# Supplementary material for: Investigating the Human Intestinal DNA Virome and Predicting Disease-Associated Virus–Host Interactions in Severe Myalgic Encephalomyelitis/Chronic Fatigue Syndrome (ME/CFS)
Source: MDPI journal article supplement (doi:10.3390/ijms242417267), 2023-12-08
Supplement: s1 [file s1]

Table 57-1. VLP viral clone analysis

| Size   | Internal Weight | External Weight | Quality     | P-value    | Min Det   | Max Det    | Total Dets | Below Thrm | Taxon Publication Score | Avy Det    | Genus       | Family | Order | Members |   |
|--------|-----------------|-----------------|-------------|------------|-----------|------------|------------|------------|-------------------------|------------|-------------|--------|-------|---------|---|
| VC_L0  | 3               | 77.97234668     | 0           | 1          | 0         | 1          | 1          | 1          | 1.577592009             | 0          | 0           | 0      | 0     | 0       |   |
| VC_L0  | 14              | 125467.6208     | 21828.6975  | 0.8518072  | 0         | 8          | 1.240384   | 1431       | 1431                    | 1          | 1.533120927 | 0      | 0     | 0       |   |
| VC_L0  | 2               | 2375.67799      | 6346.4322   | 0.3468735  | 1.976     | 0          | 8.2395468  | 300        | 281                     | 0.0733333  | 1.3918917   | 0      | 0     | 0       |   |
| VC_L00 | 2               | 219.007184      | 717.933088  | 0.1337429  | 0.0400835 | 2.23667077 | 2.2366708  | 1          | 1                       | 1          | 2.23667077  | 0      | 0     | 0       |   |
| VC_L00 | 1               | 197.749798      | 607.95959   | 0.0773367  | 0.027905  | 1.28847212 | 1.2884721  | 1          | 1                       | 1          | 1.27984865  | 0      | 0     | 0       |   |
| VC_L00 | 10              | 13500           | 17.2202797  | 0.0967237  | 4.3814    | 0          | 4.24246609 | 45         | 45                      | 0          | 1.350118396 | 0      | 0     | 0       |   |
| VC_L00 | 16              | 1014.5504       | 1166.7285   | 0.6965747  | 2.06829   | 0          | 3.16227766 | 120        | 120                     | 1          | 1.32484808  | 0      | 0     | 0       |   |
| VC_L00 | 4               | 488.096265      | 1168.7286   | 0.2949737  | 2.36045   | 0          | 1.6412216  | 6          | 6                       | 0          | 1.37941678  | 0      | 0     | 0       |   |
| VC_L00 | 3               | 825.831569      | 173.765565  | 0.2610148  | 0.002433  | 4.6991576  | 4.24498    | 3          | 3                       | 1          | 1.44017835  | 0      | 0     | 0       |   |
| VC_L00 | 9               | 1073.17101      | 361.795515  | 0.4807139  | 1.75617   | 0          | 0.412131   | 0          | 0                       | 1          | 1.52827480  | 0      | 0     | 0       |   |
| VC_L00 | 3               | 900             | 1572.2703   | 0.0541434  | 0.001609  | 0          | 0.46801276 | 3          | 3                       | 0.83761159 | 1.32094384  | 0      | 0     | 0       |   |
| VC_L00 | 34              | 42900           | 296.0187    | 0.1764672  | 4.4351128 | 0          | 6.66882398 | 276        | 6.61148308              | 0          | 0           | 0      | 0     | 0       |   |
| VC_L00 | 2               | 1               | 0           | 6407.3953  | 0         | 0          | 0          | 0          | 1                       | 1          | 0           | 0      | 0     | 0       |   |
| VC_L00 | 6               | 4500            | 1125.819    | 0.2465618  | 3.93511   | 0          | 5.7910552  | 15         | 15                      | 0          | 1.46571979  | 0      | 0     | 0       | 0 |
| VC_L00 | 8               | 8400            | 875.10385   | 0.8071302  | 9.07619   | 0          | 0.51861542 | 28         | 28                      | 1          | 1.020288549 | 0      | 0     | 0       | 0 |
| VC_L01 | 32              | 45538.25603     | 6954.21258  | 0.8626345  | 5.35841   | 0          | 0.47212595 | 496        | 496                     | 1          | 1.000834047 | 0      | 0     | 0       | 0 |
| VC_L01 | 2               | 194.287561      | 0           | 0          | 1         | 2.23667077 | 2.2366708  | 1          | 1                       | 1          | 2.23667077  | 0      | 0     | 0       | 0 |
| VC_L01 | 2               | 300             | 9645.09985  | 0.0301876  | 0.072503  | 4.12105026 | 4.1210503  | 1          | 1                       | 1          | 4.12105026  | 0      | 0     | 0       | 0 |
| VC_L01 | 5               | 300             | 1994.46519  | 0.180756   | 2.02847   | 4.1210502  | 9          | 10         | 9                       | 1          | 1.12501803  | 0      | 0     | 0       | 0 |
| VC_L01 | 2               | 300             | 10673.6668  | 0.02733569 | 0.0400801 | 5.47722575 | 5.4772258  | 1          | 1                       | 1          | 5.47722575  | 0      | 0     | 0       | 0 |
| VC_L01 | 2               | 300             | 11410.6735  | 0.0256103  | 0.119711  | 5.09901951 | 5.0990191  | 1          | 1                       | 1          | 5.09901914  | 0      | 0     | 0       | 0 |
| VC_L01 | 11              | 1600            | 3302.0205   | 0.1331059  | 1.46126   | 0          | 6.13455512 | 85         | 85                      | 1          | 4.48971938  | 0      | 0     | 0       | 0 |
| VC_L01 | 1               | 0               | 5415.88553  | 0          | 0         | 0          | 0          | 1          | 1                       | 1          | 0           | 0      | 0     | 0       | 0 |
| VC_L01 | 1               | 300             | 3464.41219  | 0.0194801  | 0.007068  | 2.23667077 | 2.2366708  | 1          | 1                       | 1          | 2.23667077  | 0      | 0     | 0       | 0 |
| VC_L01 | 2               | 300             | 3551.95307  | 0.0786238  | 0.0021281 | 5.47722575 | 5.4772258  | 1          | 1                       | 1          | 5.47722575  | 0      | 0     | 0       | 0 |
| VC_L01 | 1               | 0               | 2073.7065   | 0          | 0         | 0          | 0          | 1          | 1                       | 1          | 0           | 0      | 0     | 0       | 0 |
| VC_L01 | 2               | 118.192414      | 201.479636  | 0.0454532  | 0.059103  | 8.71779087 | 8.7177909  | 1          | 1                       | 1          | 8.71779087  | 0      | 0     | 0       | 0 |
| VC_L01 | 1               | 0               | 1454.6914   | 0          | 0         | 0          | 0          | 1          | 1                       | 1          | 0           | 0      | 0     | 0       | 0 |
| VC_L01 | 2               | 721.415671      | 12913.5886  | 0.0530904  | 0.0014831 | 1.41421352 | 4.1210503  | 3          | 3                       | 1          | 1.13057151  | 0      | 0     | 0       | 0 |
| VC_L01 | 26              | 62084.1152      | 2614.1095   | 0.6993538  | 3.42E-81  | 0.8022575  | 325        | 325        | 1                       | 6.0556808  | 0           | 0      | 0     | 0       | 0 |
| VC_L01 | 62              | 25493.5242      | 4017.0704   | 0.6887829  | 0         | 0          | 9.94967137 | 1891       | 1891                    | 0.74299125 | 7.00095116  | 0      | 0     | 0       | 0 |
| VC_L01 | 8               | 10414.8285      | 2590.53857  | 0.9757562  | 1.54E-28  | 0          | 3.74468023 | 703        | 703                     | 0          | 1.45537761  | 0      | 0     | 0       | 0 |
| VC_L02 | 15              | 19086.0782      | 1034.6772   | 0.626784   | 3.42E-16  | 0          | 8.2482125  | 105        | 105                     | 1          | 1.5645133   | 0      | 0     | 0       | 0 |
| VC_L02 | 22              | 2216.67851      | 2663.97328  | 0.0917384  | 6.66E-57  | 0          | 8.5666027  | 221        | 6.034545                | 1          | 6.034545    | 0      | 0     | 0       | 0 |
| VC_L02 | 2               | 162.704163      | 869.000051  | 0.1575915  | 0.047107  | 2.64571311 | 2.6457131  | 1          | 1                       | 1          | 2.64571311  | 0      | 0     | 0       | 0 |
| VC_L02 | 2               | 107.13165       | 798.24644   | 0.1157644  | 0.046478  | 3.7468773  | 3.7468773  | 1          | 1                       | 1          | 3.7468773   | 0      | 0     | 0       | 0 |
| VC_L02 | 3               | 900             | 556.92387   | 0.0263802  | 0.001804  | 4.63820313 | 3          | 3          | 3                       | 1          | 1.8715907   | 0      | 0     | 0       | 0 |
| VC_L02 | 12              | 91289572        | 112.70104   | 0.7489116  | 4.359894  | 4.359894   | 4.359894   | 1          | 1                       | 1          | 4.359894    | 0      | 0     | 0       | 0 |
| VC_L02 | 8               | 305.342577      | 453.460768  | 0.3680281  | 4.80E-16  | 0          | 1.73208901 | 28         | 28                      | 1          | 0.95342917  | 0      | 0     | 0       | 0 |
| VC_L02 | 1               | 0               | 27.687829   | 0          | 0         | 0          | 0          | 1          | 1                       | 0          | 0           | 0      | 0     | 0       | 0 |
| VC_L02 | 9               | 1894.10213      | 3078.45133  | 0.8465337  | 8.91E-11  | 0          | 2.6475731  | 2346       | 2346                    | 1          | 1.83981598  | 0      | 0     | 0       | 0 |
| VC_L02 | 9               | 2               | 4.1610444   | 94.578358  | 0.0215138 | 0.006185   | 2.44900701 | 5.7916212  | 1                       | 1          | 1           | 1      | 1     | 1       | 1 |
| VC_L02 | 3               | 510.182729      | 872.48806   | 0.0606738  | 0.003207  | 1.61421352 | 1.6142136  | 1          | 1                       | 1          | 1.61421352  | 0      | 0     | 0       | 0 |
| VC_L02 | 1               | 0               | 27.1815315  | 0          | 0         | 0          | 0          | 1          | 1                       | 1          | 0           | 0      | 0     | 0       | 0 |
| VC_L02 | 2               | 9.8696264       | 182.140428  | 0.0311343  | 0.008919  | 1.61421352 | 1.6142136  | 1          | 1                       | 1          | 1.61421352  | 0      | 0     | 0       | 0 |
| VC_L02 | 2               | 4.40412844      | 156.566944  | 0.0273939  | 0.201007  | 2          | 2.2366708  | 2          | 2                       | 1          | 2           | 1      | 1     | 1       | 1 |
| VC_L02 | 3               | 178.541664      | 31.701717   | 0.4338464  | 2.47E-48  | 0          | 1.451432   | 230        | 1                       | 1          | 1.451432    | 0      | 0     | 0       | 0 |
| VC_L02 | 2               | 123.026469      | 1564.41087  | 0.189996   | 0.097748  | 4.35889894 | 4.3588984  | 1          | 1                       | 1          | 4.35889894  | 0      | 0     | 0       | 0 |
| VC_L02 | 2               | 5.8002528       | 22.344944   | 0.0077782  | 0.780902  | 1.56776492 | 1.5677649  | 1          | 1                       | 1          | 1.56776492  | 0      | 0     | 0       | 0 |
| VC_L02 | 4               | 619.968034      | 93.362701   | 0.0622788  | 0.001822  | 5.67823298 | 6          | 6          | 6                       | 1          | 0.01021208  | 0      | 0     | 0       | 0 |
| VC_L02 | 2               | 213.809261      | 255.962718  | 0.4551747  | 0.071446  | 0          | 0          | 1          | 1                       | 1          | 0           | 0      | 0     | 0       | 0 |
| VC_L02 | 2               | 32.8919435      | 25.841744   | 0.1065223  | 0.055783  | 7.61618987 | 7.6161899  | 1          | 1                       | 1          | 7.61618987  | 0      | 0     | 0       | 0 |
| VC_L02 | 2               | 308.22852       | 324.088158  | 0.910115   | 0.054098  | 5.47722575 | 5.4772258  | 1          | 1                       | 1          | 5.47722575  | 0      | 0     | 0       | 0 |
| VC_L02 | 2               | 796.45085       | 281.77097   | 0.785902   | 4.07E-14  | 0          | 8.8881942  | 28         | 28                      | 1          | 8.8881942   | 0      | 0     | 0       | 0 |
| VC_L02 | 19              | 2070.6026       | 826.56416   | 0.161615   | 2.73E-54  | 0          | 4          | 171        | 171                     | 1          | 2.53478989  | 0      | 0     | 0       | 0 |
| VC_L02 | 5               | 913.0911        | 231.252084  | 0.257039   | 1.62E-06  | 0          | 1.6613208  | 10         | 10                      | 1          | 1.6613208   | 0      | 0     | 0       | 0 |
| VC_L02 | 2               | 103.704506      | 111.8717507 | 0.6797702  | 0.070784  | 1.61421352 | 1.6142136  | 1          | 1                       | 1          | 1.61421352  | 0      | 0     | 0       | 0 |
| VC_L02 | 5               | 915.49109       | 0           | 0          | 0         | 1.7120891  | 36         | 36         | 36                      | 1          | 0.96224049  | 0      | 0     | 0       | 0 |
| VC_L02 | 4               | 124.48265       | 156.42067   | 0.0431411  | 4.61E-45  | 6.855056   | 7.6577111  | 6          | 6                       | 1          | 7.2717601   | 0      | 0     | 0       | 0 |
| VC_L02 | 34              | 95057.9703      | 598.81553   | 0.9797433  | 6.86E-59  | 0          | 7.1414283  | 561        | 561                     | 1          | 5.01059196  | 0      | 0     | 0       | 0 |
| VC_L02 | 6               | 432.87923       | 1570.26172  | 0.7335388  | 2.17E-10  | 1          | 3.4661042  | 15         | 15                      | 1          | 1.28958512  | 0      | 0     | 0       | 0 |
| VC_L02 | 2               | 257.65944       | 7.9912289   | 0.0702851  | 0.055467  | 2.6475731  | 2.6475731  | 1          | 1                       | 1          | 2.6475731   | 0      | 0     | 0       | 0 |
| VC_L02 | 62              | 55600.324       | 3205.31622  | 0.9426484  | 4.58E-39  | 0          | 3.8729325  | 1891       | 1891                    | 1          | 1.16154017  | 0      | 0     | 0       | 0 |
| VC_L02 | 8               | 5476.52258      | 334.67081   | 0.4049575  | 5.11E-16  | 0          | 0          | 28         | 28                      | 1          | 0           | 0      | 0     | 0       | 0 |
| VC_L02 | 5               | 300             | 216.31572   | 0.1633615  | 3.02E-67  | 0          | 4.4989769  | 10         | 10                      | 1          | 2.8959789   | 0      | 0     | 0       | 0 |
| VC_L02 | 5               | 179.32031       | 972.48287   | 0.1894297  | 5.98E-06  | 3.3162079  | 8.8881942  | 10         | 10                      | 1          | 7.75890381  | 0      | 0     | 0       | 0 |
| VC_L02 | 4               | 558.14284       | 456.44072   | 0.9707149  | 2.86E-14  | 2.5760562  | 2.5760562  | 28         | 28                      | 0.00871429 | 7.6078908   | 0      | 0     | 0       | 0 |
| VC_L02 | 2               | 190.137429      | 297.02837   | 0.0606213  | 0.096063  | 0.1641403  | 0.164141   | 1          | 1                       | 1          | 0.1641400   | 0      | 0     | 0       | 0 |
| VC_L02 | 2               | 0               | 134.57006   | 0          | 0         | 0          | 0          | 1          | 1                       | 1          | 0           | 0      | 0     | 0       | 0 |
| VC_L02 | 2               | 300             | 380.4868    | 0.0942632  | 0.148996  | 8.24821251 | 8.2482125  | 1          | 1                       | 1          | 8.24821251  | 0      | 0     | 0       | 0 |
| VC_L02 | 1               | 900             | 334.0713    | 0.1076996  | 0.031917  | 1.68107476 | 0.8467701  | 0          | 0                       | 1          | 8.7262681   | 0      | 0     | 0       | 0 |
| VC_L02 | 2               | 0               | 1841.19001  | 0          | 0         | 0          | 0          | 1          | 1                       | 1          | 0           | 0      | 0     | 0       | 0 |
| VC_L02 | 2               | 226.303802      | 1256.6989   | 0.1526789  | 0.002722  | 0          | 0          | 1          | 1                       | 1          | 0           | 0      | 0     | 0       | 0 |
| VC_L02 | 5               | 300             | 433.69486   | 0.8811564  | 1.31E-48  | 0          | 2.44980874 | 10         | 10                      | 1          | 1.46909346  | 0      | 0     | 0       | 0 |
| VC_L02 | 2               | 1802.31101      | 39.477768   | 0.2877323  | 2.94E-67  | 0          | 4.35889894 | 10         | 10                      | 1          | 1.37894697  | 0      | 0     | 0       | 0 |
| VC_L02 | 10              | 4883.75776      | 66947.9703  | 0.0789105  | 5.43E-22  | 0          | 8.2505446  | 45         | 45                      | 1          | 1.22081495  | 0      | 0     | 0       | 0 |
| VC_L02 | 6               | 255.81771       | 536.77019   | 0.1626847  | 4.69E-10  | 2.6475731  | 7.8102098  | 15         | 15                      | 1          | 1.0915141   | 0      | 0     | 0       | 0 |
| VC_L02 | 4               | 148.54632       | 212.705609  | 0.1497115  | 4.58E-05  | 3.36855128 | 3.36855128 | 4          | 4                       | 1          | 1.48841742  | 0      | 0     | 0       | 0 |
| VC_L02 | 8               | 490.38166       | 949.50377   | 0.1791019  | 6.68E-16  | 1.5694525  | 5.21E-28   | 1          | 1                       | 1          | 3.91813907  | 0      | 0     | 0       | 0 |
| VC_L02 | 2               | 174.00521       | 192.811136  | 0.1738485  | 0.011193  | 0.78029031 | 0.7802903  | 1          | 1                       | 1          | 0.80039332  | 0      | 0     | 0       | 0 |
| VC_L02 | 2               | 120.83079       | 181.79743   | 0.1472936  | 0.046425  | 5          | 5          | 1          | 1                       | 1          | 5           | 0      | 0     | 0       | 0 |
| VC_L02 | 2               | 0               | 100         | 0          | 0         | 0          | 0          | 1          | 1                       | 1          | 0           | 0      | 0     | 0       | 0 |
| VC_L02 | 4               | 1800            | 0           | 0          | 1         | 3.4661042  | 6          | 6          |                         |            |             |        |       |         |   |







[illegible]







[illegible]











[illegible]



[illegible]



[illegible]



[illegible]











[illegible]











[illegible]



[illegible]



[illegible]



[illegible]



Table S7-2. VLP\_genome\_by\_genome\_overview

| Genome   | Order      | Family     | Genus      | VC     | VC Status           | Size | VC Subcluster | VC Subcluster Size | Quality | Adj P-value | Topology Confidence Score | Genera in VC | Families in VC | Orders in VC | Genus Confidence Score | Reference  |
|----------|------------|------------|------------|--------|---------------------|------|---------------|--------------------|---------|-------------|---------------------------|--------------|----------------|--------------|------------------------|------------|
| AB002632 | Unassigned | Unassigned | Unassigned | 0_0    | Clustered           | 3    | VC_0_0        | 3                  | 1       | 1           | 1                         | 1            | 0              | 0            | 0                      | 1 Ref      |
| AB008550 | Unassigned | Unassigned | Unassigned | 2_0    | Clustered           | 4    | VC_2_0        | 4                  | 0.13    | 0.99998694  | 0.13                      | 0            | 0              | 0            | 0                      | 1 Ref      |
| AB009866 | Unassigned | Unassigned | Unassigned | 7_0    | Clustered           | 28   | VC_7_0        | 28                 | 0.389   | 1           | 0.389                     | 0            | 0              | 0            | 0                      | 0.9947 Ref |
| AB012573 | Unassigned | Unassigned | Unassigned | 16_0   | Clustered           | 12   | VC_16_0       | 12                 | 0.6601  | 1           | 0.6601                    | 0            | 0              | 0            | 0                      | 1 Ref      |
| AB012574 | Unassigned | Unassigned | Unassigned | 16_0   | Clustered           | 12   | VC_16_0       | 12                 | 0.6601  | 1           | 0.6601                    | 0            | 0              | 0            | 0                      | 1 Ref      |
| AB016282 | Unassigned | Unassigned | Unassigned | 18_0   | Clustered           | 4    | VC_18_0       | 4                  | 0.8969  | 0.99987935  | 0.8968                    | 0            | 0              | 0            | 0                      | 1 Ref      |
| AB036666 | Unassigned | Unassigned | Unassigned | 23_0   | Clustered           | 11   | VC_23_0       | 11                 | 0.5144  | 1           | 0.5144                    | 0            | 0              | 0            | 0                      | 1 Ref      |
| AB043678 | Unassigned | Unassigned | Unassigned | 17_0   | Clustered           | 9    | VC_17_0       | 9                  | 0.6954  | 1           | 0.6954                    | 0            | 0              | 0            | 0                      | 1 Ref      |
| AB043679 | Unassigned | Unassigned | Unassigned | 17_0   | Clustered           | 9    | VC_17_0       | 9                  | 0.6954  | 1           | 0.6954                    | 0            | 0              | 0            | 0                      | 1 Ref      |
| AB044554 | Unassigned | Unassigned | Unassigned | 7_0    | Clustered           | 28   | VC_7_0        | 28                 | 0.389   | 1           | 0.389                     | 0            | 0              | 0            | 0                      | 0.9947 Ref |
| AB045978 | Unassigned | Unassigned | Unassigned | 8_0    | Clustered           | 58   | VC_8_0        | 58                 | 0.8285  | 1           | 0.8285                    | 0            | 0              | 0            | 0                      | 0.9946 Ref |
| AB063393 | Unassigned | Unassigned | Unassigned | 29_0   | Clustered           | 2    | VC_29_0       | 2                  | 1       | 1           | 1                         | 0            | 0              | 0            | 0                      | 1 Ref      |
| AB102868 | Unassigned | Unassigned | Unassigned | 30_1   | Clustered           | 53   | VC_30_1       | 53                 | 0.7151  | 1           | 0.7151                    | 0            | 0              | 0            | 0                      | 0.9325 Ref |
| AB231700 | Unassigned | Unassigned | Unassigned | 41_0   | Clustered           | 3    | VC_41_0       | 3                  | 1       | 0           | 0                         | 0            | 0              | 0            | 0                      | 1 Ref      |
| AB243556 | Unassigned | Unassigned | Unassigned | 7_0    | Clustered           | 28   | VC_7_0        | 28                 | 0.389   | 1           | 0.389                     | 0            | 0              | 0            | 0                      | 0.9947 Ref |
| AB259123 | Unassigned | Unassigned | Unassigned | 54_0   | Clustered           | 87   | VC_54_0       | 87                 | 0.9858  | 1           | 0.9858                    | 0            | 0              | 0            | 0                      | 1 Ref      |
| AB259124 | Unassigned | Unassigned | Unassigned | 56_0   | Clustered           | 6    | VC_56_0       | 6                  | 0.6713  | 0.99999999  | 0.6713                    | 0            | 0              | 0            | 0                      | 1 Ref      |
| AB276040 | Unassigned | Unassigned | Unassigned | 1_0    | Clustered           | 54   | VC_1_0        | 54                 | 0.8518  | 1           | 0.8518                    | 0            | 0              | 0            | 0                      | 1 Ref      |
| AB285204 | Unassigned | Unassigned | Unassigned | 53_0   | Clustered           | 10   | VC_53_0       | 10                 | 0.1743  | 1           | 0.1743                    | 0            | 0              | 0            | 0                      | 1 Ref      |
| AB334720 | Unassigned | Unassigned | Unassigned | 62_0   | Clustered           | 12   | VC_62_0       | 12                 | 0.7624  | 1           | 0.7624                    | 0            | 0              | 0            | 0                      | 1 Ref      |
| AB334721 | Unassigned | Unassigned | Unassigned | 62_0   | Clustered           | 12   | VC_62_0       | 12                 | 0.7624  | 1           | 0.7624                    | 0            | 0              | 0            | 0                      | 1 Ref      |
| AB362338 | Unassigned | Unassigned | Unassigned | 30_1   | Clustered           | 53   | VC_30_1       | 53                 | 0.7151  | 1           | 0.7151                    | 0            | 0              | 0            | 0                      | 0.9325 Ref |
| AB366653 | Unassigned | Unassigned | Unassigned | 67_3   | Clustered/Singleton | 1    | VC_67_3       | 1                  | 0       | 1           | 0                         | 0            | 0              | 0            | 0                      | 1 Ref      |
| AB370205 | Unassigned | Unassigned | Unassigned | 9_0    | Clustered           | 38   | VC_9_0        | 38                 | 0.4859  | 1           | 0.4859                    | 0            | 0              | 0            | 0                      | 1 Ref      |
| AB370268 | Unassigned | Unassigned | Unassigned | 12_2   | Clustered           | 19   | VC_12_2       | 19                 | 0.2009  | 1           | 0.2009                    | 0            | 0              | 0            | 0                      | 1 Ref      |
| AB374228 | Unassigned | Unassigned | Unassigned | 5_0    | Clustered           | 27   | VC_5_0        | 27                 | 0.9599  | 1           | 0.9599                    | 0            | 0              | 0            | 0                      | 1 Ref      |
| AB426868 | Unassigned | Unassigned | Unassigned | 30_1   | Clustered           | 53   | VC_30_1       | 53                 | 0.7151  | 1           | 0.7151                    | 0            | 0              | 0            | 0                      | 0.9325 Ref |
| AB434711 | Unassigned | Unassigned | Unassigned | 54_0   | Clustered           | 87   | VC_54_0       | 87                 | 0.9858  | 1           | 0.9858                    | 0            | 0              | 0            | 0                      | 1 Ref      |
| AB472900 | Unassigned | Unassigned | Unassigned | 78_0   | Clustered           | 20   | VC_78_0       | 20                 | 0.9639  | 1           | 0.9639                    | 0            | 0              | 0            | 0                      | 1 Ref      |
| AB560486 | Unassigned | Unassigned | Unassigned | 80_0   | Clustered           | 64   | VC_80_0       | 64                 | 0.418   | 1           | 0.418                     | 0            | 0              | 0            | 0                      | 0.7649 Ref |
| AB572858 | Unassigned | Unassigned | Unassigned | 16_0   | Clustered           | 12   | VC_16_0       | 12                 | 0.6601  | 1           | 0.6601                    | 0            | 0              | 0            | 0                      | 1 Ref      |
| AB597179 | Unassigned | Unassigned | Unassigned | 84_0   | Clustered           | 6    | VC_84_0       | 6                  | 0.6364  | 1           | 0.6364                    | 0            | 0              | 0            | 0                      | 1 Ref      |
| AB609718 | Unassigned | Unassigned | Unassigned | 93_0   | Clustered           | 22   | VC_93_0       | 22                 | 0.5285  | 1           | 0.5285                    | 0            | 0              | 0            | 0                      | 1 Ref      |
| AB626962 | Unassigned | Unassigned | Unassigned | 98_0   | Clustered           | 30   | VC_98_0       | 30                 | 0.7175  | 1           | 0.7175                    | 0            | 0              | 0            | 0                      | 1 Ref      |
| AB626963 | Unassigned | Unassigned | Unassigned | 98_0   | Clustered           | 30   | VC_98_0       | 30                 | 0.7175  | 1           | 0.7175                    | 0            | 0              | 0            | 0                      | 1 Ref      |
| AB647160 | Unassigned | Unassigned | Unassigned | 101_0  | Clustered           | 32   | VC_101_0      | 32                 | 0.8826  | 1           | 0.8826                    | 0            | 0              | 0            | 0                      | 1 Ref      |
| AB712291 | Unassigned | Unassigned | Unassigned | 110_0  | Clustered           | 33   | VC_110_0      | 33                 | 0.9488  | 1           | 0.9488                    | 0            | 0              | 0            | 0                      | 1 Ref      |
| AB716666 | Unassigned | Unassigned | Unassigned | 113_0  | Clustered           | 91   | VC_113_0      | 91                 | 0.9584  | 1           | 0.9584                    | 0            | 0              | 0            | 0                      | 1 Ref      |
| AB720063 | Unassigned | Unassigned | Unassigned | 115_0  | Clustered           | 9    | VC_115_0      | 9                  | 0.5166  | 1           | 0.5166                    | 0            | 0              | 0            | 0                      | 1 Ref      |
| AB720064 | Unassigned | Unassigned | Unassigned | 118_0  | Clustered           | 13   | VC_118_0      | 13                 | 1       | 1           | 1                         | 0            | 0              | 0            | 0                      | 1 Ref      |
| AB731695 | Unassigned | Unassigned | Unassigned | 101_0  | Clustered           | 32   | VC_101_0      | 32                 | 0.8826  | 1           | 0.8826                    | 0            | 0              | 0            | 0                      | 1 Ref      |
| AB746912 | Unassigned | Unassigned | Unassigned | 120_0  | Clustered           | 3    | VC_120_0      | 3                  | 0.7107  | 0.99211494  | 0.7051                    | 0            | 0              | 0            | 0                      | 1 Ref      |
| AB757800 | Unassigned | Unassigned | Unassigned | 119_0  | Clustered           | 9    | VC_119_0      | 9                  | 0.9977  | 0.98988637  | 0.9876                    | 0            | 0              | 0            | 0                      | 1 Ref      |
| AB757801 | Unassigned | Unassigned | Unassigned | 119_0  | Clustered           | 9    | VC_119_0      | 9                  | 0.9977  | 0.98988637  | 0.9876                    | 0            | 0              | 0            | 0                      | 1 Ref      |
| AB775548 | Unassigned | Unassigned | Unassigned | 127_0  | Clustered           | 17   | VC_127_0      | 17                 | 0.9222  | 1           | 0.9222                    | 0            | 0              | 0            | 0                      | 1 Ref      |
| AB775549 | Unassigned | Unassigned | Unassigned | 132_0  | Clustered           | 19   | VC_132_0      | 19                 | 0.6051  | 1           | 0.6051                    | 0            | 0              | 0            | 0                      | 1 Ref      |
| AB797215 | Unassigned | Unassigned | Unassigned | 134_2  | Clustered           | 17   | VC_134_2      | 17                 | 0.1715  | 1           | 0.1715                    | 0            | 0              | 0            | 0                      | 0.9853 Ref |
| AB828698 | Unassigned | Unassigned | Unassigned | 56_0   | Clustered           | 6    | VC_56_0       | 6                  | 0.6713  | 0.99999999  | 0.6713                    | 0            | 0              | 0            | 0                      | 1 Ref      |
| AB853330 | Unassigned | Unassigned | Unassigned | 155_13 | Clustered           | 3    | VC_155_13     | 3                  | 0.0087  | 0.95130224  | 0.0083                    | 0            | 0              | 0            | 0                      | 1 Ref      |
| AB853331 | Unassigned | Unassigned | Unassigned | 155_23 | Clustered/Singleton | 1    | VC_155_23     | 1                  | 0       | 1           | 0                         | 0            | 0              | 0            | 0                      | 1 Ref      |
| AB854109 | Unassigned | Unassigned | Unassigned | 160_0  | Clustered           | 4    | VC_160_0      | 4                  | 0.1752  | 0.9999526   | 0.1752                    | 0            | 0              | 0            | 0                      | 1 Ref      |
| AB863625 | Unassigned | Unassigned | Unassigned | 167_0  | Clustered           | 3    | VC_167_0      | 3                  | 0.5731  | 0.99804396  | 0.572                     | 0            | 0              | 0            | 0                      | 1 Ref      |
| AB897757 | Unassigned | Unassigned | Unassigned | 170_10 | Clustered           | 5    | VC_170_10     | 5                  | 0.0614  | 0.96483582  | 0.0592                    | 0            | 0              | 0            | 0                      | 1 Ref      |
| AB903967 | Unassigned | Unassigned | Unassigned | 155_14 | Clustered/Singleton | 1    | VC_155_14     | 1                  | 0       | 1           | 0                         | 0            | 0              | 0            | 0                      | 1 Ref      |
| AB910392 | Unassigned | Unassigned | Unassigned | 173_0  | Clustered           | 3    | VC_173_0      | 3                  | 0.6871  | 0.99826575  | 0.6859                    | 0            | 0              | 0            | 0                      | 1 Ref      |
| AB910393 | Unassigned | Unassigned | Unassigned | 180_0  | Clustered           | 3    | VC_180_0      | 3                  | 0.9607  | 0.99333557  | 0.9543                    | 0            | 0              | 0            | 0                      | 1 Ref      |
| AB910602 | Unassigned | Unassigned | Unassigned | 183_0  | Clustered           | 5    | VC_183_0      | 5                  | 0.7449  | 0.99885646  | 0.744                     | 0            | 0              | 0            | 0                      | 1 Ref      |
| AB916497 | Unassigned | Unassigned | Unassigned | 186_0  | Clustered           | 4    | VC_186_0      | 4                  | 0.2052  | 0.99998618  | 0.2052                    | 0            | 0              | 0            | 0                      | 1 Ref      |
| AB920995 | Unassigned | Unassigned | Unassigned | 71_0   | Clustered           | 27   | VC_71_0       | 27                 | 0.5964  | 1           | 0.5964                    | 0            | 0              | 0            | 0                      | 0.9943 Ref |
| AB930182 | Unassigned | Unassigned | Unassigned | 87_3   | Clustered           | 19   | VC_87_3       | 19                 | 0.3645  | 1           | 0.3645                    | 0            | 0              | 0            | 0                      | 0.807 Ref  |
| AB931172 | Unassigned | Unassigned | Unassigned | 56_0   | Clustered           | 6    | VC_56_0       | 6                  | 0.6713  | 0.99999999  | 0.6713                    | 0            | 0              | 0            | 0                      | 1 Ref      |
| AB937974 | Unassigned | Unassigned | Unassigned | 54_0   | Clustered           | 87   | VC_54_0       | 87                 | 0.9858  | 1           | 0.9858                    | 0            | 0              | 0            | 0                      | 1 Ref      |
| AB971354 | Unassigned | Unassigned | Unassigned | 196_0  | Clustered           | 13   | VC_196_0      | 13                 | 0.9973  | 0.99823802  | 0.9955                    | 0            | 0              | 0            | 0                      | 1 Ref      |
| AB981169 | Unassigned | Unassigned | Unassigned | 1_0    | Clustered           | 54   | VC_1_0        | 54                 | 0.8518  | 1           | 0.8518                    | 0            | 0              | 0            | 0                      | 1 Ref      |
| AB981170 | Unassigned | Unassigned | Unassigned | 54_0   | Clustered           | 87   | VC_54_0       | 87                 | 0.9858  | 1           | 0.9858                    | 0            | 0              | 0            | 0                      | 1 Ref      |
| AB983711 | Unassigned | Unassigned | Unassigned | 71_0   | Clustered           | 27   | VC_71_0       | 27                 | 0.5964  | 1           | 0.5964                    | 0            | 0              | 0            | 0                      | 0.9943 Ref |
| AC171169 | Unassigned | Unassigned | Unassigned | 198_11 | Clustered/Singleton | 1    | VC_198_11     | 1                  | 0       | 1           | 0                         | 0            | 0              | 0            | 0                      | 1 Ref      |
| AB002163 | Unassigned | Unassigned | Unassigned | 205_0  | Clustered           | 5    | VC_205_0      | 5                  | 0.1325  | 0.84698401  | 0.1122                    | 0            | 0              | 0            | 0                      | 1 Ref      |
| AF009630 | Unassigned | Unassigned | Unassigned | 210_0  | Clustered           | 105  | VC_210_0      | 105                | 0.4076  | 1           | 0.4076                    | 0            | 0              | 0            | 0                      | 0.7766 Ref |
| AF011378 | Unassigned | Unassigned | Unassigned | 210_0  | Clustered           | 105  | VC_210_0      | 105                | 0.4076  | 1           | 0.4076                    | 0            | 0              | 0            | 0                      | 0.7766 Ref |
| AF020713 | Unassigned | Unassigned | Unassigned | 91_3   | Clustered/Singleton | 1    | VC_91_3       | 1                  | 0       | 1           | 0                         | 0            | 0              | 0            | 0                      | 1 Ref      |
| AF022214 | Unassigned | Unassigned | Unassigned | 222_1  | Clustered           | 19   | VC_222_1      | 19                 | 0.4166  | 1           | 0.4166                    | 0            | 0              | 0            | 0                      | 1 Ref      |
| AF059242 | Unassigned | Unassigned | Unassigned | 196_0  | Clustered           | 13   | VC_196_0      | 13                 | 0.9973  | 0.99823802  | 0.9955                    | 0            | 0              | 0            | 0                      | 1 Ref      |
| AF059243 | Unassigned | Unassigned | Unassigned | 196_0  | Clustered           | 13   | VC_196_0      | 13                 | 0.9973  | 0.99823802  | 0.9955                    | 0            | 0              | 0            | 0                      | 1 Ref      |
| AF063097 | Unassigned | Unassigned | Unassigned | 235_0  | Clustered           | 60   | VC_235_0      | 60                 | 0.9413  | 1           | 0.9413                    | 0            | 0              | 0            | 0                      | 1 Ref      |
| AF065411 | Unassigned | Unassigned | Unassigned | 239_0  | Clustered           | 2    | VC_239_0      | 2                  | 0.926   | 0.72985431  | 0.6759                    | 0            | 0              | 0            | 0                      | 1 Ref      |
| AF083977 | Unassigned | Unassigned | Unassigned | 52_0   | Clustered           | 9    | VC_52_0       | 9                  | 0.5586  | 1           | 0.5586                    | 0            | 0              | 0            | 0                      | 1 Ref      |
| AF085222 | Unassigned | Unassigned | Unassigned | 258_0  | Clustered           | 121  | VC_258_0      | 121                | 0.7359  | 1           | 0.7359                    | 0            | 0              | 0            | 0                      | 0.9999 Ref |



|          |            |            |            |        |           |              |     |        |            |        |   |   |   |        |     |
|----------|------------|------------|------------|--------|-----------|--------------|-----|--------|------------|--------|---|---|---|--------|-----|
| AF115102 | Unassigned | Unassigned | Unassigned | 258_0  | Clustered | 121 VC_258_0 | 121 | 0.7359 | 1          | 0.7359 | 0 | 0 | 0 | 0.9999 | Ref |
| AF115103 | Unassigned | Unassigned | Unassigned | 258_0  | Clustered | 121 VC_258_0 | 121 | 0.7359 | 1          | 0.7359 | 0 | 0 | 0 | 0.9999 | Ref |
| AF125163 | Unassigned | Unassigned | Unassigned | 5_0    | Clustered | 27 VC_5_0    | 27  | 0.9599 | 1          | 0.9599 | 0 | 0 | 0 | 1      | Ref |
| AF125520 | Unassigned | Unassigned | Unassigned | 35_0   | Clustered | 35 VC_35_0   | 35  | 0.431  | 1          | 0.431  | 0 | 0 | 0 | 1      | Ref |
| AF133242 | Unassigned | Unassigned | Unassigned | 283_0  | Clustered | 2 VC_283_0   | 2   | 1      | 1          | 1      | 0 | 0 | 0 | 1      | Ref |
| AF145054 | Unassigned | Unassigned | Unassigned | 258_0  | Clustered | 121 VC_258_0 | 121 | 0.7359 | 1          | 0.7359 | 0 | 0 | 0 | 0.9999 | Ref |
| AF155037 | Unassigned | Unassigned | Unassigned | 284_0  | Clustered | 3 VC_284_0   | 3   | 1      | 1          | 1      | 0 | 0 | 0 | 1      | Ref |
| AF157835 | Unassigned | Unassigned | Unassigned | 31_0   | Clustered | 10 VC_31_0   | 10  | 0.5129 | 1          | 0.5129 | 0 | 0 | 0 | 1      | Ref |
| AF158101 | Unassigned | Unassigned | Unassigned | 290_91 | Clustered | 11 VC_290_91 | 11  | 0.0281 | 1          | 0.0281 | 0 | 0 | 0 | 1      | Ref |
| AF158600 | Unassigned | Unassigned | Unassigned | 260_0  | Clustered | 46 VC_260_0  | 46  | 0.5137 | 1          | 0.5137 | 0 | 0 | 0 | 1      | Ref |
| AF165214 | Unassigned | Unassigned | Unassigned | 182_0  | Clustered | 2 VC_182_0   | 2   | 0.0495 | 0.95664605 | 0.0473 | 0 | 0 | 0 | 1      | Ref |
| AF176025 | Unassigned | Unassigned | Unassigned | 266_0  | Clustered | 13 VC_266_0  | 13  | 0.3622 | 1          | 0.3622 | 0 | 0 | 0 | 1      | Ref |
| AF176027 | Unassigned | Unassigned | Unassigned | 310_0  | Clustered | 155 VC_310_0 | 155 | 0.9979 | 1          | 0.9979 | 0 | 0 | 0 | 1      | Ref |
| AF176028 | Unassigned | Unassigned | Unassigned | 310_0  | Clustered | 155 VC_310_0 | 155 | 0.9979 | 1          | 0.9979 | 0 | 0 | 0 | 1      | Ref |
| AF176029 | Unassigned | Unassigned | Unassigned | 310_0  | Clustered | 155 VC_310_0 | 155 | 0.9979 | 1          | 0.9979 | 0 | 0 | 0 | 1      | Ref |
| AF176030 | Unassigned | Unassigned | Unassigned | 310_0  | Clustered | 155 VC_310_0 | 155 | 0.9979 | 1          | 0.9979 | 0 | 0 | 0 | 1      | Ref |
| AF176031 | Unassigned | Unassigned | Unassigned | 310_0  | Clustered | 155 VC_310_0 | 155 | 0.9979 | 1          | 0.9979 | 0 | 0 | 0 | 1      | Ref |
| AF176032 | Unassigned | Unassigned | Unassigned | 310_0  | Clustered | 155 VC_310_0 | 155 | 0.9979 | 1          | 0.9979 | 0 | 0 | 0 | 1      | Ref |
| AF176033 | Unassigned | Unassigned | Unassigned | 310_0  | Clustered | 155 VC_310_0 | 155 | 0.9979 | 1          | 0.9979 | 0 | 0 | 0 | 1      | Ref |
| AF176034 | Unassigned | Unassigned | Unassigned | 310_0  | Clustered | 155 VC_310_0 | 155 | 0.9979 | 1          | 0.9979 | 0 | 0 | 0 | 1      | Ref |
| AF189021 | Unassigned | Unassigned | Unassigned | 311_0  | Clustered | 11 VC_311_0  | 11  | 0.7851 | 1          | 0.7851 | 0 | 0 | 0 | 1      | Ref |
| AF191797 | Unassigned | Unassigned | Unassigned | 313_0  | Clustered | 2 VC_313_0   | 2   | 1      | 1          | 1      | 0 | 0 | 0 | 1      | Ref |
| AF195902 | Unassigned | Unassigned | Unassigned | 275_0  | Clustered | 6 VC_275_0   | 6   | 0.6515 | 0.99999994 | 0.6515 | 0 | 0 | 0 | 0.9333 | Ref |
| AF217253 | Unassigned | Unassigned | Unassigned | 30_1   | Clustered | 53 VC_30_1   | 53  | 0.7151 | 1          | 0.7151 | 0 | 0 | 0 | 0.9325 | Ref |
| AF222060 | Unassigned | Unassigned | Unassigned | 317_0  | Clustered | 33 VC_317_0  | 33  | 0.8756 | 1          | 0.8756 | 0 | 0 | 0 | 1      | Ref |
| AF227250 | Unassigned | Unassigned | Unassigned | 322_0  | Clustered | 12 VC_322_0  | 12  | 0.8924 | 1          | 0.8924 | 0 | 0 | 0 | 1      | Ref |
| AF232233 | Unassigned | Unassigned | Unassigned | 192_0  | Clustered | 22 VC_192_0  | 22  | 0.6582 | 1          | 0.6582 | 0 | 0 | 0 | 1      | Ref |
| AF234172 | Unassigned | Unassigned | Unassigned | 254_0  | Clustered | 14 VC_254_0  | 14  | 0.9118 | 1          | 0.9118 | 0 | 0 | 0 | 0.967  | Ref |
| AF234173 | Unassigned | Unassigned | Unassigned | 254_0  | Clustered | 14 VC_254_0  | 14  | 0.9118 | 1          | 0.9118 | 0 | 0 | 0 | 0.967  | Ref |
| AF242738 | Unassigned | Unassigned | Unassigned | 268_0  | Clustered | 10 VC_268_0  | 10  | 0.1417 | 1          | 0.1417 | 0 | 0 | 0 | 0.9333 | Ref |
| AF271693 | Unassigned | Unassigned | Unassigned | 335_34 | Clustered | 2 VC_335_34  | 2   | 0.0045 | 0.95750889 | 0.0043 | 0 | 0 | 0 | 1      | Ref |
| AF274751 | Unassigned | Unassigned | Unassigned | 310_0  | Clustered | 155 VC_310_0 | 155 | 0.9979 | 1          | 0.9979 | 0 | 0 | 0 | 1      | Ref |
| AF299300 | Unassigned | Unassigned | Unassigned | 310_0  | Clustered | 155 VC_310_0 | 155 | 0.9979 | 1          | 0.9979 | 0 | 0 | 0 | 1      | Ref |
| AF299301 | Unassigned | Unassigned | Unassigned | 310_0  | Clustered | 155 VC_310_0 | 155 | 0.9979 | 1          | 0.9979 | 0 | 0 | 0 | 1      | Ref |
| AF299302 | Unassigned | Unassigned | Unassigned | 310_0  | Clustered | 155 VC_310_0 | 155 | 0.9979 | 1          | 0.9979 | 0 | 0 | 0 | 1      | Ref |
| AF299303 | Unassigned | Unassigned | Unassigned | 310_0  | Clustered | 155 VC_310_0 | 155 | 0.9979 | 1          | 0.9979 | 0 | 0 | 0 | 1      | Ref |
| AF299304 | Unassigned | Unassigned | Unassigned | 310_0  | Clustered | 155 VC_310_0 | 155 | 0.9979 | 1          | 0.9979 | 0 | 0 | 0 | 1      | Ref |
| AF299305 | Unassigned | Unassigned | Unassigned | 310_0  | Clustered | 155 VC_310_0 | 155 | 0.9979 | 1          | 0.9979 | 0 | 0 | 0 | 1      | Ref |
| AF299306 | Unassigned | Unassigned | Unassigned | 310_0  | Clustered | 155 VC_310_0 | 155 | 0.9979 | 1          | 0.9979 | 0 | 0 | 0 | 1      | Ref |
| AF299307 | Unassigned | Unassigned | Unassigned | 310_0  | Clustered | 155 VC_310_0 | 155 | 0.9979 | 1          | 0.9979 | 0 | 0 | 0 | 1      | Ref |
| AF299308 | Unassigned | Unassigned | Unassigned | 310_0  | Clustered | 155 VC_310_0 | 155 | 0.9979 | 1          | 0.9979 | 0 | 0 | 0 | 1      | Ref |
| AF299309 | Unassigned | Unassigned | Unassigned | 310_0  | Clustered | 155 VC_310_0 | 155 | 0.9979 | 1          | 0.9979 | 0 | 0 | 0 | 1      | Ref |
| AF299310 | Unassigned | Unassigned | Unassigned | 310_0  | Clustered | 155 VC_310_0 | 155 | 0.9979 | 1          | 0.9979 | 0 | 0 | 0 | 1      | Ref |
| AF299311 | Unassigned | Unassigned | Unassigned | 310_0  | Clustered | 155 VC_310_0 | 155 | 0.9979 | 1          | 0.9979 | 0 | 0 | 0 | 1      | Ref |
| AF299312 | Unassigned | Unassigned | Unassigned | 310_0  | Clustered | 155 VC_310_0 | 155 | 0.9979 | 1          | 0.9979 | 0 | 0 | 0 | 1      | Ref |
| AF299313 | Unassigned | Unassigned | Unassigned | 310_0  | Clustered | 155 VC_310_0 | 155 | 0.9979 | 1          | 0.9979 | 0 | 0 | 0 | 1      | Ref |
| AF299314 | Unassigned | Unassigned | Unassigned | 310_0  | Clustered | 155 VC_310_0 | 155 | 0.9979 | 1          | 0.9979 | 0 | 0 | 0 | 1      | Ref |
| AF301375 | Unassigned | Unassigned | Unassigned | 239_0  | Clustered | 2 VC_239_0   | 2   | 0.926  | 0.72985431 | 0.6759 | 0 | 0 | 0 | 1      | Ref |
| AF306496 | Unassigned | Unassigned | Unassigned | 338_0  | Clustered | 12 VC_338_0  | 12  | 0.8919 | 1          | 0.8919 | 0 | 0 | 0 | 1      | Ref |
| AF320576 | Unassigned | Unassigned | Unassigned | 340_1  | Clustered | 17 VC_340_1  | 17  | 0.0863 | 1          | 0.0863 | 0 | 0 | 0 | 0.8235 | Ref |
| AF323668 | Unassigned | Unassigned | Unassigned | 269_0  | Clustered | 7 VC_269_0   | 7   | 0.2278 | 1          | 0.2278 | 0 | 0 | 0 | 1      | Ref |
| AF323669 | Unassigned | Unassigned | Unassigned | 266_0  | Clustered | 13 VC_266_0  | 13  | 0.3622 | 1          | 0.3622 | 0 | 0 | 0 | 1      | Ref |
| AF323671 | Unassigned | Unassigned | Unassigned | 351_0  | Clustered | 9 VC_351_0   | 9   | 0.9391 | 0.99999913 | 0.9391 | 0 | 0 | 0 | 1      | Ref |
| AF334111 | Unassigned | Unassigned | Unassigned | 234_0  | Clustered | 2 VC_234_0   | 2   | 0.3333 | 0          | 0      | 0 | 0 | 0 | 1      | Ref |
| AF335538 | Unassigned | Unassigned | Unassigned | 32_1   | Clustered | 16 VC_32_1   | 16  | 0.1962 | 1          | 0.1962 | 0 | 0 | 0 | 0.8333 | Ref |
| AF338467 | Unassigned | Unassigned | Unassigned | 352_0  | Clustered | 31 VC_352_0  | 31  | 0.9547 | 1          | 0.9547 | 0 | 0 | 0 | 1      | Ref |
| AF396866 | Unassigned | Unassigned | Unassigned | 353_0  | Clustered | 3 VC_353_0   | 3   | 0.2241 | 0.81279277 | 0.1821 | 0 | 0 | 0 | 1      | Ref |
| AF399011 | Unassigned | Unassigned | Unassigned | 356_0  | Clustered | 21 VC_356_0  | 21  | 0.5409 | 1          | 0.5409 | 0 | 0 | 0 | 1      | Ref |
| AF424781 | Unassigned | Unassigned | Unassigned | 9_0    | Clustered | 38 VC_9_0    | 38  | 0.4859 | 1          | 0.4859 | 0 | 0 | 0 | 1      | Ref |
| AF424782 | Unassigned | Unassigned | Unassigned | 8_0    | Clustered | 58 VC_8_0    | 58  | 0.8285 | 1          | 0.8285 | 0 | 0 | 0 | 0.9946 | Ref |
| AF424783 | Unassigned | Unassigned | Unassigned | 7_0    | Clustered | 28 VC_7_0    | 28  | 0.389  | 1          | 0.389  | 0 | 0 | 0 | 0.9947 | Ref |
| AF440571 | Unassigned | Unassigned | Unassigned | 361_0  | Clustered | 7 VC_361_0   | 7   | 0.9353 | 0.99999998 | 0.9353 | 0 | 0 | 0 | 1      | Ref |
| AF440695 | Unassigned | Unassigned | Unassigned | 364_0  | Clustered | 3 VC_364_0   | 3   | 0.729  | 0.98867275 | 0.7207 | 0 | 0 | 0 | 1      | Ref |
| AF447491 | Unassigned | Unassigned | Unassigned | 365_0  | Clustered | 6 VC_365_0   | 6   | 0.5395 | 1          | 0.5395 | 0 | 0 | 0 | 1      | Ref |
| AF452449 | Unassigned | Unassigned | Unassigned | 16_0   | Clustered | 12 VC_16_0   | 12  | 0.6601 | 1          | 0.6601 | 0 | 0 | 0 | 1      | Ref |
| AF453500 | Unassigned | Unassigned | Unassigned | 16_0   | Clustered | 12 VC_16_0   | 12  | 0.6601 | 1          | 0.6601 | 0 | 0 | 0 | 1      | Ref |
| AF454431 | Unassigned | Unassigned | Unassigned | 373_0  | Clustered | 358 VC_373_0 | 358 | 0.9614 | 1          | 0.9614 | 0 | 0 | 0 | 1      | Ref |
| AF489521 | Unassigned | Unassigned | Unassigned | 266_0  | Clustered | 13 VC_266_0  | 13  | 0.3622 | 1          | 0.3622 | 0 | 0 | 0 | 1      | Ref |
| AF493143 | Unassigned | Unassigned | Unassigned | 131_0  | Clustered | 43 VC_131_0  | 43  | 0.8853 | 1          | 0.8853 | 0 | 0 | 0 | 1      | Ref |
| AF503408 | Unassigned | Unassigned | Unassigned | 254_0  | Clustered | 14 VC_254_0  | 14  | 0.9118 | 1          | 0.9118 | 0 | 0 | 0 | 0.967  | Ref |
| AF513032 | Unassigned | Unassigned | Unassigned | 98_0   | Clustered | 30 VC_98_0   | 30  | 0.7175 | 1          | 0.7175 | 0 | 0 | 0 | 1      | Ref |
| AF513033 | Unassigned | Unassigned | Unassigned | 98_0   | Clustered | 30 VC_98_0   | 30  | 0.7175 | 1          | 0.7175 | 0 | 0 | 0 | 1      | Ref |
| AF527608 | Unassigned | Unassigned | Unassigned | 30_1   | Clustered | 53 VC_30_1   | 53  | 0.7151 | 1          | 0.7151 | 0 | 0 | 0 | 0.9325 | Ref |
| AF547430 | Unassigned | Unassigned | Unassigned | 384_16 | Clustered | 42 VC_384_16 | 42  | 0.134  | 1          | 0.134  | 0 | 0 | 0 | 0.7282 | Ref |
| AF547987 | Unassigned | Unassigned | Unassigned | 32_1   | Clustered | 16 VC_32_1   | 16  | 0.1962 | 1          | 0.1962 | 0 | 0 | 0 | 0.8333 | Ref |
| AJ006589 | Unassigned | Unassigned | Unassigned | 386_0  | Clustered | 10 VC_386_0  | 10  | 0.7454 | 1          | 0.7454 | 0 | 0 | 0 | 1      | Ref |
| AJ242593 | Unassigned | Unassigned | Unassigned | 392_0  | Clustered | 9 VC_392_0   | 9   | 0.7527 | 1          | 0.7527 | 0 | 0 | 0 | 1      | Ref |
| AJ245616 | Unassigned | Unassigned | Unassigned | 266_0  | Clustered | 13 VC_266_0  | 13  | 0.3622 | 1          | 0.3622 | 0 | 0 | 0 | 1      | Ref |
| AJ251789 | Unassigned | Unassigned | Unassigned | 279_0  | Clustered | 11 VC_279_0  | 11  | 0.4839 | 1          | 0.4839 | 0 | 0 | 0 | 0.8727 | Ref |
| AJ251805 | Unassigned | Unassigned | Unassigned | 398_0  | Clustered | 51 VC_398_0  | 51  | 0.8741 | 1          | 0.8741 | 0 | 0 | 0 | 1      | Ref |
| AJ270057 | Unassigned | Unassigned | Unassigned | 206_0  | Clustered | 28 VC_206_0  | 28  | 0.2427 | 0.99971175 | 0.2426 | 0 | 0 | 0 | 1      | Ref |



|           |            |            |            |        |                     |             |    |        |            |        |   |   |   |            |
|-----------|------------|------------|------------|--------|---------------------|-------------|----|--------|------------|--------|---|---|---|------------|
| AJ278322  | Unassigned | Unassigned | Unassigned | 420_0  | Clustered           | 3 VC_420_0  | 3  | 0.3294 | 0.99825267 | 0.3288 | 0 | 0 | 0 | 1 Ref      |
| AJ298298  | Unassigned | Unassigned | Unassigned | 47_0   | Clustered           | 12 VC_47_0  | 12 | 0.3571 | 1          | 0.3571 | 0 | 0 | 0 | 1 Ref      |
| AJ302074  | Unassigned | Unassigned | Unassigned | 425_0  | Clustered           | 40 VC_425_0 | 40 | 0.8399 | 1          | 0.8399 | 0 | 0 | 0 | 0.9974 Ref |
| AJ312240  | Unassigned | Unassigned | Unassigned | 393_0  | Clustered           | 5 VC_393_0  | 5  | 0.4703 | 0.99999992 | 0.4703 | 0 | 0 | 0 | 0.9 Ref    |
| AJ318471  | Unassigned | Unassigned | Unassigned | 398_0  | Clustered           | 51 VC_398_0 | 51 | 0.8741 | 1          | 0.8741 | 0 | 0 | 0 | 1 Ref      |
| AJ344259  | Unassigned | Unassigned | Unassigned | 360_0  | Clustered           | 22 VC_360_0 | 22 | 0.96   | 1          | 0.96   | 0 | 0 | 0 | 1 Ref      |
| AJ414696  | Unassigned | Unassigned | Unassigned | 360_0  | Clustered           | 22 VC_360_0 | 22 | 0.96   | 1          | 0.96   | 0 | 0 | 0 | 1 Ref      |
| AJ421943  | Unassigned | Unassigned | Unassigned | 281_0  | Clustered           | 2 VC_281_0  | 2  | 0.0753 | 0.9540953  | 0.0719 | 0 | 0 | 0 | 1 Ref      |
| AJ505558  | Unassigned | Unassigned | Unassigned | 434_0  | Clustered           | 45 VC_434_0 | 45 | 0.9479 | 1          | 0.9479 | 0 | 0 | 0 | 1 Ref      |
| AJ536073  | Unassigned | Unassigned | Unassigned | 435_0  | Clustered           | 7 VC_435_0  | 7  | 0.9041 | 0.9998143  | 0.9039 | 0 | 0 | 0 | 1 Ref      |
| AJ550635  | Unassigned | Unassigned | Unassigned | 206_0  | Clustered           | 28 VC_206_0 | 28 | 0.2427 | 0.99971175 | 0.2426 | 0 | 0 | 0 | 1 Ref      |
| AJ550940  | Unassigned | Unassigned | Unassigned | 386_0  | Clustered           | 10 VC_386_0 | 10 | 0.7454 | 1          | 0.7454 | 0 | 0 | 0 | 1 Ref      |
| AJ556162  | Unassigned | Unassigned | Unassigned | 43_0   | Clustered           | 16 VC_43_0  | 16 | 0.2017 | 1          | 0.2017 | 0 | 0 | 0 | 0.9667 Ref |
| AJ604530  | Unassigned | Unassigned | Unassigned | 197_0  | Clustered           | 2 VC_197_0  | 2  | 0.0103 | 0.93953444 | 0.0097 | 0 | 0 | 0 | 1 Ref      |
| AJ604531  | Unassigned | Unassigned | Unassigned | 197_0  | Clustered           | 2 VC_197_0  | 2  | 0.0103 | 0.93953444 | 0.0097 | 0 | 0 | 0 | 1 Ref      |
| AJ630128  | Unassigned | Unassigned | Unassigned | 447_5  | Clustered           | 2 VC_447_5  | 2  | 0.0172 | 0.93642158 | 0.0161 | 0 | 0 | 0 | 1 Ref      |
| AJ635161  | Unassigned | Unassigned | Unassigned | 454_0  | Clustered           | 4 VC_454_0  | 4  | 1      | 1          | 1      | 0 | 0 | 0 | 1 Ref      |
| AJ748296  | Unassigned | Unassigned | Unassigned | 360_0  | Clustered           | 22 VC_360_0 | 22 | 0.96   | 1          | 0.96   | 0 | 0 | 0 | 1 Ref      |
| AJ783769  | Unassigned | Unassigned | Unassigned | 458_0  | Clustered           | 2 VC_458_0  | 2  | 0.8124 | 0.72985431 | 0.593  | 0 | 0 | 0 | 1 Ref      |
| AJ854042  | Unassigned | Unassigned | Unassigned | 362_0  | Clustered           | 2 VC_362_0  | 2  | 0.3217 | 0.93865445 | 0.3019 | 0 | 0 | 0 | 1 Ref      |
| AJ875026  | Unassigned | Unassigned | Unassigned | 360_0  | Clustered           | 22 VC_360_0 | 22 | 0.96   | 1          | 0.96   | 0 | 0 | 0 | 1 Ref      |
| AJ888457  | Unassigned | Unassigned | Unassigned | 461_0  | Clustered           | 3 VC_461_0  | 3  | 0.8247 | 0.99509929 | 0.8207 | 0 | 0 | 0 | 1 Ref      |
| AJ969242  | Unassigned | Unassigned | Unassigned | 283_0  | Clustered           | 2 VC_283_0  | 2  | 1      | 1          | 1      | 0 | 0 | 0 | 1 Ref      |
| AM076770  | Unassigned | Unassigned | Unassigned | 464_0  | Clustered           | 16 VC_464_0 | 16 | 0.9558 | 1          | 0.9558 | 0 | 0 | 0 | 1 Ref      |
| AM084414  | Unassigned | Unassigned | Unassigned | 465_0  | Clustered           | 80 VC_465_0 | 80 | 0.9988 | 1          | 0.9988 | 0 | 0 | 0 | 1 Ref      |
| AM084415  | Unassigned | Unassigned | Unassigned | 466_0  | Clustered           | 66 VC_466_0 | 66 | 0.9246 | 1          | 0.9246 | 0 | 0 | 0 | 1 Ref      |
| AM087120  | Unassigned | Unassigned | Unassigned | 361_0  | Clustered           | 7 VC_361_0  | 7  | 0.9353 | 0.99999998 | 0.9353 | 0 | 0 | 0 | 1 Ref      |
| AM087121  | Unassigned | Unassigned | Unassigned | 361_0  | Clustered           | 7 VC_361_0  | 7  | 0.9353 | 0.99999998 | 0.9353 | 0 | 0 | 0 | 1 Ref      |
| AM087122  | Unassigned | Unassigned | Unassigned | 361_0  | Clustered           | 7 VC_361_0  | 7  | 0.9353 | 0.99999998 | 0.9353 | 0 | 0 | 0 | 1 Ref      |
| AM087123  | Unassigned | Unassigned | Unassigned | 361_0  | Clustered           | 7 VC_361_0  | 7  | 0.9353 | 0.99999998 | 0.9353 | 0 | 0 | 0 | 1 Ref      |
| AM156909  | Unassigned | Unassigned | Unassigned | 470_0  | Clustered           | 62 VC_470_0 | 62 | 0.902  | 1          | 0.902  | 0 | 0 | 0 | 1 Ref      |
| AM183667  | Unassigned | Unassigned | Unassigned | 399_0  | Clustered           | 49 VC_399_0 | 49 | 0.7927 | 1          | 0.7927 | 0 | 0 | 0 | 1 Ref      |
| AM265638  | Unassigned | Unassigned | Unassigned | 434_0  | Clustered           | 45 VC_434_0 | 45 | 0.9479 | 1          | 0.9479 | 0 | 0 | 0 | 1 Ref      |
| AM419438  | Unassigned | Unassigned | Unassigned | 363_0  | Clustered           | 3 VC_363_0  | 3  | 0.8866 | 0.98155579 | 0.8702 | 0 | 0 | 0 | 1 Ref      |
| AM4491472 | Unassigned | Unassigned | Unassigned | 475_0  | Clustered           | 96 VC_475_0 | 96 | 0.9303 | 1          | 0.9303 | 0 | 0 | 0 | 0.9575 Ref |
| AM749121  | Unassigned | Unassigned | Unassigned | 477_0  | Clustered           | 4 VC_477_0  | 4  | 0.7825 | 0.99997292 | 0.7825 | 0 | 0 | 0 | 1 Ref      |
| AM749441  | Unassigned | Unassigned | Unassigned | 172_0  | Clustered           | 26 VC_172_0 | 26 | 0.7909 | 1          | 0.7909 | 0 | 0 | 0 | 1 Ref      |
| AM910650  | Unassigned | Unassigned | Unassigned | 486_0  | Clustered           | 47 VC_486_0 | 47 | 0.9022 | 1          | 0.9022 | 0 | 0 | 0 | 1 Ref      |
| AM910651  | Unassigned | Unassigned | Unassigned | 434_0  | Clustered           | 45 VC_434_0 | 45 | 0.9479 | 1          | 0.9479 | 0 | 0 | 0 | 1 Ref      |
| AP000363  | Unassigned | Unassigned | Unassigned | 35_0   | Clustered           | 35 VC_35_0  | 35 | 0.431  | 1          | 0.431  | 0 | 0 | 0 | 1 Ref      |
| AP000422  | Unassigned | Unassigned | Unassigned | 35_0   | Clustered           | 35 VC_35_0  | 35 | 0.431  | 1          | 0.431  | 0 | 0 | 0 | 1 Ref      |
| AP001553  | Unassigned | Unassigned | Unassigned | 12_2   | Clustered           | 19 VC_12_2  | 19 | 0.2009 | 1          | 0.2009 | 0 | 0 | 0 | 1 Ref      |
| AP004402  | Unassigned | Unassigned | Unassigned | 35_0   | Clustered           | 35 VC_35_0  | 35 | 0.431  | 1          | 0.431  | 0 | 0 | 0 | 1 Ref      |
| AP005153  | Unassigned | Unassigned | Unassigned | 35_0   | Clustered           | 35 VC_35_0  | 35 | 0.431  | 1          | 0.431  | 0 | 0 | 0 | 1 Ref      |
| AP005154  | Unassigned | Unassigned | Unassigned | 35_0   | Clustered           | 35 VC_35_0  | 35 | 0.431  | 1          | 0.431  | 0 | 0 | 0 | 1 Ref      |
| AP008953  | Unassigned | Unassigned | Unassigned | 9_0    | Clustered           | 38 VC_9_0   | 38 | 0.4859 | 1          | 0.4859 | 0 | 0 | 0 | 1 Ref      |
| AP008954  | Unassigned | Unassigned | Unassigned | 12_0   | Clustered           | 21 VC_12_0  | 21 | 0.2262 | 1          | 0.2262 | 0 | 0 | 0 | 0.9571 Ref |
| AP008979  | Unassigned | Unassigned | Unassigned | 115_0  | Clustered           | 9 VC_115_0  | 9  | 0.5166 | 1          | 0.5166 | 0 | 0 | 0 | 1 Ref      |
| AP008986  | Unassigned | Unassigned | Unassigned | 377_0  | Clustered           | 16 VC_377_0 | 16 | 0.6424 | 1          | 0.6424 | 0 | 0 | 0 | 1 Ref      |
| AP009146  | Unassigned | Unassigned | Unassigned | 64_0   | Clustered           | 2 VC_64_0   | 2  | 0.1127 | 0.95690971 | 0.1079 | 0 | 0 | 0 | 1 Ref      |
| AP009363  | Unassigned | Unassigned | Unassigned | 8_0    | Clustered           | 58 VC_8_0   | 58 | 0.8285 | 1          | 0.8285 | 0 | 0 | 0 | 0.9946 Ref |
| AP009390  | Unassigned | Unassigned | Unassigned | 93_0   | Clustered           | 22 VC_93_0  | 22 | 0.5285 | 1          | 0.5285 | 0 | 0 | 0 | 1 Ref      |
| AP011113  | Unassigned | Unassigned | Unassigned | 290_10 | Clustered/Singleton | 1 VC_290_10 | 1  | 0      | 1          | 0      | 0 | 0 | 0 | 1 Ref      |
| AP011616  | Unassigned | Unassigned | Unassigned | 493_0  | Clustered           | 4 VC_493_0  | 4  | 0.9871 | 0.99748973 | 0.9847 | 0 | 0 | 0 | 1 Ref      |
| AP011617  | Unassigned | Unassigned | Unassigned | 493_0  | Clustered           | 4 VC_493_0  | 4  | 0.9871 | 0.99748973 | 0.9847 | 0 | 0 | 0 | 1 Ref      |
| AP011955  | Unassigned | Unassigned | Unassigned | 10_0   | Clustered           | 25 VC_10_0  | 25 | 0.3437 | 1          | 0.3437 | 0 | 0 | 0 | 0.9733 Ref |
| AP011956  | Unassigned | Unassigned | Unassigned | 10_0   | Clustered           | 25 VC_10_0  | 25 | 0.3437 | 1          | 0.3437 | 0 | 0 | 0 | 0.9733 Ref |
| AP012341  | Unassigned | Unassigned | Unassigned | 8_0    | Clustered           | 58 VC_8_0   | 58 | 0.8285 | 1          | 0.8285 | 0 | 0 | 0 | 0.9946 Ref |
| AP012529  | Unassigned | Unassigned | Unassigned | 35_0   | Clustered           | 35 VC_35_0  | 35 | 0.431  | 1          | 0.431  | 0 | 0 | 0 | 1 Ref      |
| AP012530  | Unassigned | Unassigned | Unassigned | 43_1   | Clustered           | 10 VC_43_1  | 10 | 0.1173 | 1          | 0.1173 | 0 | 0 | 0 | 0.8222 Ref |
| AP012531  | Unassigned | Unassigned | Unassigned | 35_0   | Clustered           | 35 VC_35_0  | 35 | 0.431  | 1          | 0.431  | 0 | 0 | 0 | 1 Ref      |
| AP012532  | Unassigned | Unassigned | Unassigned | 35_0   | Clustered           | 35 VC_35_0  | 35 | 0.431  | 1          | 0.431  | 0 | 0 | 0 | 1 Ref      |
| AP012534  | Unassigned | Unassigned | Unassigned | 44_0   | Clustered           | 49 VC_44_0  | 49 | 0.4506 | 1          | 0.4506 | 0 | 0 | 0 | 0.8605 Ref |
| AP012535  | Unassigned | Unassigned | Unassigned | 35_0   | Clustered           | 35 VC_35_0  | 35 | 0.431  | 1          | 0.431  | 0 | 0 | 0 | 1 Ref      |
| AP012538  | Unassigned | Unassigned | Unassigned | 43_1   | Clustered           | 10 VC_43_1  | 10 | 0.1173 | 1          | 0.1173 | 0 | 0 | 0 | 0.8222 Ref |
| AP012539  | Unassigned | Unassigned | Unassigned | 43_1   | Clustered           | 10 VC_43_1  | 10 | 0.1173 | 1          | 0.1173 | 0 | 0 | 0 | 0.8222 Ref |
| AP012540  | Unassigned | Unassigned | Unassigned | 43_1   | Clustered           | 10 VC_43_1  | 10 | 0.1173 | 1          | 0.1173 | 0 | 0 | 0 | 0.8222 Ref |
| AP013029  | Unassigned | Unassigned | Unassigned | 87_3   | Clustered           | 19 VC_87_3  | 19 | 0.3645 | 1          | 0.3645 | 0 | 0 | 0 | 0.807 Ref  |
| AP013538  | Unassigned | Unassigned | Unassigned | 352_0  | Clustered           | 31 VC_352_0 | 31 | 0.9547 | 1          | 0.9547 | 0 | 0 | 0 | 1 Ref      |
| AP013539  | Unassigned | Unassigned | Unassigned | 352_0  | Clustered           | 31 VC_352_0 | 31 | 0.9547 | 1          | 0.9547 | 0 | 0 | 0 | 1 Ref      |
| AP013540  | Unassigned | Unassigned | Unassigned | 496_0  | Clustered           | 22 VC_496_0 | 22 | 0.6101 | 1          | 0.6101 | 0 | 0 | 0 | 1 Ref      |
| AP013541  | Unassigned | Unassigned | Unassigned | 496_0  | Clustered           | 22 VC_496_0 | 22 | 0.6101 | 1          | 0.6101 | 0 | 0 | 0 | 1 Ref      |
| AP013542  | Unassigned | Unassigned | Unassigned | 496_0  | Clustered           | 22 VC_496_0 | 22 | 0.6101 | 1          | 0.6101 | 0 | 0 | 0 | 1 Ref      |
| AP013545  | Unassigned | Unassigned | Unassigned | 496_0  | Clustered           | 22 VC_496_0 | 22 | 0.6101 | 1          | 0.6101 | 0 | 0 | 0 | 1 Ref      |
| AP013546  | Unassigned | Unassigned | Unassigned | 498_0  | Clustered           | 4 VC_498_0  | 4  | 0.2907 | 0.99998435 | 0.2907 | 0 | 0 | 0 | 1 Ref      |
| AP013547  | Unassigned | Unassigned | Unassigned | 498_0  | Clustered           | 4 VC_498_0  | 4  | 0.2907 | 0.99998435 | 0.2907 | 0 | 0 | 0 | 1 Ref      |
| AP013548  | Unassigned | Unassigned | Unassigned | 498_0  | Clustered           | 4 VC_498_0  | 4  | 0.2907 | 0.99998435 | 0.2907 | 0 | 0 | 0 | 1 Ref      |
| AP014714  | Unassigned | Unassigned | Unassigned | 508_0  | Clustered           | 2 VC_508_0  | 2  | 0.01   | 0.95344863 | 0.0096 | 0 | 0 | 0 | 1 Ref      |
| AP014715  | Unassigned | Unassigned | Unassigned | 508_0  | Clustered           | 2 VC_508_0  | 2  | 0.01   | 0.95344863 | 0.0096 | 0 | 0 | 0 | 1 Ref      |
| AP014858  | Unassigned | Unassigned | Unassigned | 511_5  | Clustered/Singleton | 1 VC_511_5  | 1  | 0      | 1          | 0      | 0 | 0 | 0 | 1 Ref      |
| AP014887  | Unassigned | Unassigned | Unassigned | 515_0  | Clustered           | 8 VC_515_0  | 8  | 0.3973 | 1          | 0.3973 | 0 | 0 | 0 | 1 Ref      |



|          |            |            |            |         |                     |              |     |        |            |        |   |   |   |            |
|----------|------------|------------|------------|---------|---------------------|--------------|-----|--------|------------|--------|---|---|---|------------|
| AP014888 | Unassigned | Unassigned | Unassigned | 518_0   | Clustered           | 16 VC_518_0  | 16  | 0.9983 | 1          | 0.9983 | 0 | 0 | 0 | 1 Ref      |
| AP017924 | Unassigned | Unassigned | Unassigned | 357_0   | Clustered           | 2 VC_357_0   | 2   | 0.0674 | 0.95654162 | 0.0645 | 0 | 0 | 0 | 1 Ref      |
| AP017925 | Unassigned | Unassigned | Unassigned | 357_0   | Clustered           | 2 VC_357_0   | 2   | 0.0674 | 0.95654162 | 0.0645 | 0 | 0 | 0 | 1 Ref      |
| AP018361 | Unassigned | Unassigned | Unassigned | 279_0   | Clustered           | 11 VC_279_0  | 11  | 0.4839 | 1          | 0.4839 | 0 | 0 | 0 | 0.8727 Ref |
| AP018375 | Unassigned | Unassigned | Unassigned | 155_9   | Clustered           | 3 VC_155_9   | 3   | 0.0083 | 0.97241045 | 0.0081 | 0 | 0 | 0 | 1 Ref      |
| AP018399 | Unassigned | Unassigned | Unassigned | 69_0    | Clustered/Singleton | 1 VC_69_0    | 1   | 0      | 1          | 0      | 0 | 0 | 0 | 1 Ref      |
| AP018462 | Unassigned | Unassigned | Unassigned | 525_0   | Clustered           | 8 VC_525_0   | 8   | 0.443  | 1          | 0.443  | 0 | 0 | 0 | 1 Ref      |
| AP018463 | Unassigned | Unassigned | Unassigned | 525_0   | Clustered           | 8 VC_525_0   | 8   | 0.443  | 1          | 0.443  | 0 | 0 | 0 | 1 Ref      |
| AP018469 | Unassigned | Unassigned | Unassigned | 241_0   | Clustered           | 21 VC_241_0  | 21  | 0.8342 | 1          | 0.8342 | 0 | 0 | 0 | 1 Ref      |
| AP018470 | Unassigned | Unassigned | Unassigned | 241_0   | Clustered           | 21 VC_241_0  | 21  | 0.8342 | 1          | 0.8342 | 0 | 0 | 0 | 1 Ref      |
| AP018471 | Unassigned | Unassigned | Unassigned | 241_0   | Clustered           | 21 VC_241_0  | 21  | 0.8342 | 1          | 0.8342 | 0 | 0 | 0 | 1 Ref      |
| AP018476 | Unassigned | Unassigned | Unassigned | 222_1   | Clustered           | 19 VC_222_1  | 19  | 0.4166 | 1          | 0.4166 | 0 | 0 | 0 | 1 Ref      |
| AP018477 | Unassigned | Unassigned | Unassigned | 335_43  | Clustered           | 4 VC_335_43  | 4   | 0.014  | 0.99995965 | 0.014  | 0 | 0 | 0 | 1 Ref      |
| AP018478 | Unassigned | Unassigned | Unassigned | 335_43  | Clustered           | 4 VC_335_43  | 4   | 0.014  | 0.99995965 | 0.014  | 0 | 0 | 0 | 1 Ref      |
| AP018479 | Unassigned | Unassigned | Unassigned | 223_6   | Clustered           | 42 VC_223_6  | 42  | 0.4717 | 1          | 0.4717 | 0 | 0 | 0 | 0.8351 Ref |
| AP018480 | Unassigned | Unassigned | Unassigned | 222_1   | Clustered           | 19 VC_222_1  | 19  | 0.4166 | 1          | 0.4166 | 0 | 0 | 0 | 1 Ref      |
| AP018485 | Unassigned | Unassigned | Unassigned | 531_0   | Clustered           | 32 VC_531_0  | 32  | 0.6859 | 1          | 0.6859 | 0 | 0 | 0 | 1 Ref      |
| AP018487 | Unassigned | Unassigned | Unassigned | 536_0   | Clustered           | 6 VC_536_0   | 6   | 0.129  | 1          | 0.129  | 0 | 0 | 0 | 1 Ref      |
| AP018714 | Unassigned | Unassigned | Unassigned | 93_0    | Clustered           | 22 VC_93_0   | 22  | 0.5285 | 1          | 0.5285 | 0 | 0 | 0 | 1 Ref      |
| AP018715 | Unassigned | Unassigned | Unassigned | 93_0    | Clustered           | 22 VC_93_0   | 22  | 0.5285 | 1          | 0.5285 | 0 | 0 | 0 | 1 Ref      |
| AP018813 | Unassigned | Unassigned | Unassigned | 290_92  | Clustered           | 4 VC_290_92  | 4   | 0.0078 | 0.99995066 | 0.0078 | 0 | 0 | 0 | 1 Ref      |
| AP018814 | Unassigned | Unassigned | Unassigned | 290_88  | Clustered           | 2 VC_290_88  | 2   | 0.0025 | 0.95596547 | 0.0024 | 0 | 0 | 0 | 1 Ref      |
| AP018815 | Unassigned | Unassigned | Unassigned | 80_0    | Clustered           | 64 VC_80_0   | 64  | 0.418  | 1          | 0.418  | 0 | 0 | 0 | 0.7649 Ref |
| AP018932 | Unassigned | Unassigned | Unassigned | 290_187 | Clustered/Singleton | 1 VC_290_187 | 1   | 0      | 1          | 0      | 0 | 0 | 0 | 1 Ref      |
| AP019417 | Unassigned | Unassigned | Unassigned | 548_0   | Clustered           | 9 VC_548_0   | 9   | 0.8018 | 1          | 0.8018 | 0 | 0 | 0 | 1 Ref      |
| AP019418 | Unassigned | Unassigned | Unassigned | 356_0   | Clustered           | 21 VC_356_0  | 21  | 0.5409 | 1          | 0.5409 | 0 | 0 | 0 | 1 Ref      |
| AP019522 | Unassigned | Unassigned | Unassigned | 159_0   | Clustered           | 25 VC_159_0  | 25  | 0.7699 | 1          | 0.7699 | 0 | 0 | 0 | 1 Ref      |
| AP019524 | Unassigned | Unassigned | Unassigned | 550_0   | Clustered           | 2 VC_550_0   | 2   | 0.4    | 0.89435023 | 0.3578 | 0 | 0 | 0 | 1 Ref      |
| AP019525 | Unassigned | Unassigned | Unassigned | 550_0   | Clustered           | 2 VC_550_0   | 2   | 0.4    | 0.89435023 | 0.3578 | 0 | 0 | 0 | 1 Ref      |
| AP019527 | Unassigned | Unassigned | Unassigned | 552_0   | Clustered           | 9 VC_552_0   | 9   | 1      | 1          | 1      | 0 | 0 | 0 | 1 Ref      |
| AP019535 | Unassigned | Unassigned | Unassigned | 80_10   | Clustered/Singleton | 1 VC_80_10   | 1   | 0      | 1          | 0      | 0 | 0 | 0 | 1 Ref      |
| AP019559 | Unassigned | Unassigned | Unassigned | 198_17  | Clustered/Singleton | 1 VC_198_17  | 1   | 0      | 1          | 0      | 0 | 0 | 0 | 1 Ref      |
| AP019560 | Unassigned | Unassigned | Unassigned | 11_0    | Clustered           | 19 VC_11_0   | 19  | 0.7544 | 1          | 0.7544 | 0 | 0 | 0 | 1 Ref      |
| AP019561 | Unassigned | Unassigned | Unassigned | 11_0    | Clustered           | 19 VC_11_0   | 19  | 0.7544 | 1          | 0.7544 | 0 | 0 | 0 | 1 Ref      |
| AP019562 | Unassigned | Unassigned | Unassigned | 11_0    | Clustered           | 19 VC_11_0   | 19  | 0.7544 | 1          | 0.7544 | 0 | 0 | 0 | 1 Ref      |
| AY007505 | Unassigned | Unassigned | Unassigned | 268_1   | Clustered           | 20 VC_268_1  | 20  | 0.1906 | 1          | 0.1906 | 0 | 0 | 0 | 0.6789 Ref |
| AY027935 | Unassigned | Unassigned | Unassigned | 5_0     | Clustered           | 27 VC_5_0    | 27  | 0.9599 | 1          | 0.9599 | 0 | 0 | 0 | 1 Ref      |
| AY029185 | Unassigned | Unassigned | Unassigned | 285_0   | Clustered           | 3 VC_285_0   | 3   | 0.3109 | 0.99848226 | 0.3104 | 0 | 0 | 0 | 1 Ref      |
| AY048850 | Unassigned | Unassigned | Unassigned | 559_0   | Clustered           | 3 VC_559_0   | 3   | 1      | 1          | 1      | 0 | 0 | 0 | 1 Ref      |
| AY052766 | Unassigned | Unassigned | Unassigned | 30_1    | Clustered           | 53 VC_30_1   | 53  | 0.7151 | 1          | 0.7151 | 0 | 0 | 0 | 0.9325 Ref |
| AY055382 | Unassigned | Unassigned | Unassigned | 47_0    | Clustered           | 12 VC_47_0   | 12  | 0.3571 | 1          | 0.3571 | 0 | 0 | 0 | 1 Ref      |
| AY078382 | Unassigned | Unassigned | Unassigned | 486_0   | Clustered           | 47 VC_486_0  | 47  | 0.9022 | 1          | 0.9022 | 0 | 1 | 0 | 1 Ref      |
| AY082070 | Unassigned | Unassigned | Unassigned | 561_0   | Clustered           | 3 VC_561_0   | 3   | 0.3411 | 0.99792547 | 0.3404 | 0 | 0 | 0 | 1 Ref      |
| AY129330 | Unassigned | Unassigned | Unassigned | 538_96  | Clustered/Singleton | 1 VC_538_96  | 1   | 0      | 1          | 0      | 0 | 0 | 0 | 1 Ref      |
| AY129331 | Unassigned | Unassigned | Unassigned | 571_7   | Clustered           | 28 VC_571_7  | 28  | 0.1651 | 1          | 0.1651 | 0 | 0 | 0 | 0.8519 Ref |
| AY129332 | Unassigned | Unassigned | Unassigned | 532_0   | Clustered           | 75 VC_532_0  | 75  | 0.9393 | 1          | 0.9393 | 0 | 0 | 0 | 1 Ref      |
| AY129333 | Unassigned | Unassigned | Unassigned | 536_1   | Clustered           | 2 VC_536_1   | 2   | 0.0373 | 0.95718761 | 0.0357 | 0 | 0 | 0 | 1 Ref      |
| AY129334 | Unassigned | Unassigned | Unassigned | 526_0   | Clustered           | 32 VC_526_0  | 32  | 0.9037 | 1          | 0.9037 | 0 | 0 | 0 | 1 Ref      |
| AY129335 | Unassigned | Unassigned | Unassigned | 577_0   | Clustered           | 21 VC_577_0  | 21  | 0.9908 | 1          | 0.9908 | 0 | 0 | 0 | 1 Ref      |
| AY129337 | Unassigned | Unassigned | Unassigned | 579_8   | Clustered           | 2 VC_579_8   | 2   | 0.0032 | 0.66515174 | 0.0021 | 0 | 0 | 0 | 1 Ref      |
| AY129338 | Unassigned | Unassigned | Unassigned | 566_10  | Clustered/Singleton | 1 VC_566_10  | 1   | 0      | 1          | 0      | 0 | 0 | 0 | 1 Ref      |
| AY129339 | Unassigned | Unassigned | Unassigned | 586_0   | Clustered           | 2 VC_586_0   | 2   | 0.098  | 0.95623977 | 0.0937 | 0 | 0 | 0 | 1 Ref      |
| AY131267 | Unassigned | Unassigned | Unassigned | 279_0   | Clustered           | 11 VC_279_0  | 11  | 0.4839 | 1          | 0.4839 | 0 | 0 | 0 | 0.8727 Ref |
| AY133112 | Unassigned | Unassigned | Unassigned | 24_0    | Clustered           | 3 VC_24_0    | 3   | 0.4232 | 0.9983762  | 0.4226 | 0 | 0 | 0 | 1 Ref      |
| AY135486 | Unassigned | Unassigned | Unassigned | 235_0   | Clustered           | 60 VC_235_0  | 60  | 0.9413 | 1          | 0.9413 | 0 | 0 | 0 | 1 Ref      |
| AY135739 | Unassigned | Unassigned | Unassigned | 235_0   | Clustered           | 60 VC_235_0  | 60  | 0.9413 | 1          | 0.9413 | 0 | 0 | 0 | 1 Ref      |
| AY150271 | Unassigned | Unassigned | Unassigned | 492_0   | Clustered           | 20 VC_492_0  | 20  | 0.7887 | 1          | 0.7887 | 0 | 0 | 0 | 1 Ref      |
| AY176327 | Unassigned | Unassigned | Unassigned | 155_8   | Clustered           | 66 VC_155_8  | 66  | 0.4537 | 1          | 0.4537 | 0 | 0 | 0 | 0.8182 Ref |
| AY190604 | Unassigned | Unassigned | Unassigned | 317_0   | Clustered           | 33 VC_317_0  | 33  | 0.8756 | 1          | 0.8756 | 0 | 0 | 0 | 1 Ref      |
| AY212251 | Unassigned | Unassigned | Unassigned | 99_0    | Clustered           | 5 VC_99_0    | 5   | 0.0694 | 0.98113835 | 0.0681 | 0 | 0 | 0 | 1 Ref      |
| AY216660 | Unassigned | Unassigned | Unassigned | 595_0   | Clustered           | 35 VC_595_0  | 35  | 0.8809 | 1          | 0.8809 | 0 | 0 | 0 | 1 Ref      |
| AY236756 | Unassigned | Unassigned | Unassigned | 597_0   | Clustered           | 6 VC_597_0   | 6   | 0.9222 | 0.99999993 | 0.9222 | 0 | 0 | 0 | 1 Ref      |
| AY242528 | Unassigned | Unassigned | Unassigned | 16_0    | Clustered           | 12 VC_16_0   | 12  | 0.6601 | 1          | 0.6601 | 0 | 0 | 0 | 1 Ref      |
| AY247822 | Unassigned | Unassigned | Unassigned | 405_0   | Clustered           | 126 VC_405_0 | 126 | 0.9614 | 1          | 0.9614 | 0 | 0 | 0 | 1 Ref      |
| AY251033 | Unassigned | Unassigned | Unassigned | 235_0   | Clustered           | 60 VC_235_0  | 60  | 0.9413 | 1          | 0.9413 | 0 | 0 | 0 | 1 Ref      |
| AY257527 | Unassigned | Unassigned | Unassigned | 435_0   | Clustered           | 7 VC_435_0   | 7   | 0.9041 | 0.9998143  | 0.9039 | 0 | 0 | 0 | 1 Ref      |
| AY264774 | Unassigned | Unassigned | Unassigned | 405_0   | Clustered           | 126 VC_405_0 | 126 | 0.9614 | 1          | 0.9614 | 0 | 0 | 0 | 1 Ref      |
| AY264775 | Unassigned | Unassigned | Unassigned | 405_0   | Clustered           | 126 VC_405_0 | 126 | 0.9614 | 1          | 0.9614 | 0 | 0 | 0 | 1 Ref      |
| AY264776 | Unassigned | Unassigned | Unassigned | 405_0   | Clustered           | 126 VC_405_0 | 126 | 0.9614 | 1          | 0.9614 | 0 | 0 | 0 | 1 Ref      |
| AY264777 | Unassigned | Unassigned | Unassigned | 405_0   | Clustered           | 126 VC_405_0 | 126 | 0.9614 | 1          | 0.9614 | 0 | 0 | 0 | 1 Ref      |
| AY264778 | Unassigned | Unassigned | Unassigned | 405_0   | Clustered           | 126 VC_405_0 | 126 | 0.9614 | 1          | 0.9614 | 0 | 0 | 0 | 1 Ref      |
| AY266303 | Unassigned | Unassigned | Unassigned | 457_0   | Clustered           | 7 VC_457_0   | 7   | 0.2549 | 1          | 0.2549 | 0 | 0 | 0 | 0.7143 Ref |
| AY283928 | Unassigned | Unassigned | Unassigned | 549_1   | Clustered           | 6 VC_549_1   | 6   | 0.1479 | 0.9998319  | 0.1478 | 0 | 0 | 0 | 1 Ref      |
| AY288927 | Unassigned | Unassigned | Unassigned | 466_0   | Clustered           | 66 VC_466_0  | 66  | 0.9246 | 1          | 0.9246 | 0 | 0 | 0 | 1 Ref      |
| AY299121 | Unassigned | Unassigned | Unassigned | 115_0   | Clustered           | 9 VC_115_0   | 9   | 0.5166 | 1          | 0.5166 | 0 | 0 | 0 | 1 Ref      |
| AY303349 | Unassigned | Unassigned | Unassigned | 293_10  | Clustered           | 9 VC_293_10  | 9   | 0.0615 | 0.99999884 | 0.0615 | 0 | 0 | 0 | 0.6667 Ref |
| AY308796 | Unassigned | Unassigned | Unassigned | 603_0   | Clustered           | 28 VC_603_0  | 28  | 0.7692 | 1          | 0.7692 | 0 | 0 | 0 | 1 Ref      |
| AY319521 | Unassigned | Unassigned | Unassigned | 6_0     | Clustered           | 44 VC_6_0    | 44  | 0.9068 | 1          | 0.9068 | 0 | 0 | 0 | 1 Ref      |
| AY320035 | Unassigned | Unassigned | Unassigned | 606_0   | Clustered           | 2 VC_606_0   | 2   | 0.3086 | 0.91192888 | 0.2814 | 0 | 0 | 0 | 1 Ref      |
| AY324828 | Unassigned | Unassigned | Unassigned | 608_0   | Clustered           | 2 VC_608_0   | 2   | 1      | 1          | 1      | 0 | 0 | 0 | 1 Ref      |
| AY328852 | Unassigned | Unassigned | Unassigned | 515_0   | Clustered           | 8 VC_515_0   | 8   | 0.3973 | 1          | 0.3973 | 0 | 0 | 0 | 1 Ref      |



|          |            |            |            |        |                     |              |     |        |            |        |   |   |   |            |
|----------|------------|------------|------------|--------|---------------------|--------------|-----|--------|------------|--------|---|---|---|------------|
| AY328853 | Unassigned | Unassigned | Unassigned | 515_0  | Clustered           | 8 VC_515_0   | 8   | 0.3973 | 1          | 0.3973 | 0 | 0 | 0 | 1 Ref      |
| AY343333 | Unassigned | Unassigned | Unassigned | 609_0  | Clustered           | 27 VC_609_0  | 27  | 0.9943 | 1          | 0.9943 | 0 | 0 | 0 | 1 Ref      |
| AY349011 | Unassigned | Unassigned | Unassigned | 168_0  | Clustered           | 18 VC_168_0  | 18  | 0.7394 | 1          | 0.7394 | 0 | 0 | 0 | 0.8627 Ref |
| AY370673 | Unassigned | Unassigned | Unassigned | 466_0  | Clustered           | 66 VC_466_0  | 66  | 0.9246 | 1          | 0.9246 | 0 | 0 | 0 | 1 Ref      |
| AY370674 | Unassigned | Unassigned | Unassigned | 466_0  | Clustered           | 66 VC_466_0  | 66  | 0.9246 | 1          | 0.9246 | 0 | 0 | 0 | 1 Ref      |
| AY370762 | Unassigned | Unassigned | Unassigned | 618_0  | Clustered           | 50 VC_618_0  | 50  | 0.9989 | 1          | 0.9989 | 0 | 0 | 0 | 1 Ref      |
| AY374448 | Unassigned | Unassigned | Unassigned | 37_0   | Clustered           | 4 VC_37_0    | 4   | 0.4325 | 0.99998062 | 0.4325 | 0 | 0 | 0 | 1 Ref      |
| AY375531 | Unassigned | Unassigned | Unassigned | 619_1  | Clustered           | 7 VC_619_1   | 7   | 0.1834 | 0.99999997 | 0.1834 | 0 | 0 | 0 | 1 Ref      |
| AY388628 | Unassigned | Unassigned | Unassigned | 618_0  | Clustered           | 50 VC_618_0  | 50  | 0.9989 | 1          | 0.9989 | 0 | 0 | 0 | 1 Ref      |
| AY394005 | Unassigned | Unassigned | Unassigned | 185_0  | Clustered           | 53 VC_185_0  | 53  | 0.9153 | 1          | 0.9153 | 0 | 0 | 0 | 1 Ref      |
| AY423772 | Unassigned | Unassigned | Unassigned | 618_0  | Clustered           | 50 VC_618_0  | 50  | 0.9989 | 1          | 0.9989 | 0 | 0 | 0 | 1 Ref      |
| AY441783 | Unassigned | Unassigned | Unassigned | 622_0  | Clustered           | 9 VC_622_0   | 9   | 0.9922 | 0.99999994 | 0.9922 | 0 | 0 | 0 | 1 Ref      |
| AY453853 | Unassigned | Unassigned | Unassigned | 365_0  | Clustered           | 6 VC_365_0   | 6   | 0.5395 | 1          | 0.5395 | 0 | 0 | 0 | 1 Ref      |
| AY500152 | Unassigned | Unassigned | Unassigned | 335_5  | Clustered           | 11 VC_335_5  | 11  | 0.0469 | 1          | 0.0469 | 0 | 0 | 0 | 0.7636 Ref |
| AY500153 | Unassigned | Unassigned | Unassigned | 335_9  | Clustered           | 2 VC_335_9   | 2   | 0.0055 | 0.95750934 | 0.0053 | 0 | 0 | 0 | 1 Ref      |
| AY505112 | Unassigned | Unassigned | Unassigned | 627_0  | Clustered           | 16 VC_627_0  | 16  | 0.9168 | 1          | 0.9168 | 0 | 0 | 0 | 1 Ref      |
| AY508486 | Unassigned | Unassigned | Unassigned | 10_0   | Clustered           | 25 VC_10_0   | 25  | 0.3437 | 1          | 0.3437 | 0 | 0 | 0 | 0.9733 Ref |
| AY510084 | Unassigned | Unassigned | Unassigned | 627_0  | Clustered           | 16 VC_627_0  | 16  | 0.9168 | 1          | 0.9168 | 0 | 0 | 0 | 1 Ref      |
| AY526908 | Unassigned | Unassigned | Unassigned | 285_0  | Clustered           | 3 VC_285_0   | 3   | 0.3109 | 0.99848226 | 0.3104 | 0 | 0 | 0 | 1 Ref      |
| AY526909 | Unassigned | Unassigned | Unassigned | 285_0  | Clustered           | 3 VC_285_0   | 3   | 0.3109 | 0.99848226 | 0.3104 | 0 | 0 | 0 | 1 Ref      |
| AY539836 | Unassigned | Unassigned | Unassigned | 257_0  | Clustered           | 3 VC_257_0   | 3   | 0.2099 | 0.99831999 | 0.2095 | 0 | 0 | 0 | 1 Ref      |
| AY543070 | Unassigned | Unassigned | Unassigned | 198_38 | Clustered           | 3 VC_198_38  | 3   | 0.0172 | 0.99845083 | 0.0172 | 0 | 0 | 0 | 1 Ref      |
| AY569307 | Unassigned | Unassigned | Unassigned | 631_0  | Clustered           | 2 VC_631_0   | 2   | 1      | 1          | 1      | 0 | 0 | 0 | 1 Ref      |
| AY575774 | Unassigned | Unassigned | Unassigned | 632_0  | Clustered           | 9 VC_632_0   | 9   | 0.9524 | 1          | 0.9524 | 0 | 0 | 0 | 1 Ref      |
| AY583234 | Unassigned | Unassigned | Unassigned | 253_0  | Clustered           | 3 VC_253_0   | 3   | 0.7619 | 0.9595722  | 0.7311 | 0 | 0 | 0 | 1 Ref      |
| AY583235 | Unassigned | Unassigned | Unassigned | 253_0  | Clustered           | 3 VC_253_0   | 3   | 0.7619 | 0.9595722  | 0.7311 | 0 | 0 | 0 | 1 Ref      |
| AY583236 | Unassigned | Unassigned | Unassigned | 253_0  | Clustered           | 3 VC_253_0   | 3   | 0.7619 | 0.9595722  | 0.7311 | 0 | 0 | 0 | 1 Ref      |
| AY587007 | Unassigned | Unassigned | Unassigned | 198_38 | Clustered           | 3 VC_198_38  | 3   | 0.0172 | 0.99845083 | 0.0172 | 0 | 0 | 0 | 1 Ref      |
| AY605066 | Unassigned | Unassigned | Unassigned | 279_0  | Clustered           | 11 VC_279_0  | 11  | 0.4839 | 1          | 0.4839 | 0 | 0 | 0 | 0.8727 Ref |
| AY605181 | Unassigned | Unassigned | Unassigned | 286_0  | Clustered           | 2 VC_286_0   | 2   | 0.1926 | 0.95154944 | 0.1832 | 0 | 0 | 0 | 1 Ref      |
| AY625898 | Unassigned | Unassigned | Unassigned | 645_0  | Clustered           | 20 VC_645_0  | 20  | 0.8502 | 1          | 0.8502 | 0 | 0 | 0 | 1 Ref      |
| AY682195 | Unassigned | Unassigned | Unassigned | 544_2  | Clustered/Singleton | 1 VC_544_2   | 1   | 0      | 1          | 0      | 0 | 0 | 0 | 1 Ref      |
| AY692264 | Unassigned | Unassigned | Unassigned | 198_38 | Clustered           | 3 VC_198_38  | 3   | 0.0172 | 0.99845083 | 0.0172 | 0 | 0 | 0 | 1 Ref      |
| AY699705 | Unassigned | Unassigned | Unassigned | 260_0  | Clustered           | 46 VC_260_0  | 46  | 0.5137 | 1          | 0.5137 | 0 | 0 | 0 | 1 Ref      |
| AY701338 | Unassigned | Unassigned | Unassigned | 435_0  | Clustered           | 7 VC_435_0   | 7   | 0.9041 | 0.9998143  | 0.9039 | 0 | 0 | 0 | 1 Ref      |
| AY714348 | Unassigned | Unassigned | Unassigned | 27_0   | Clustered           | 4 VC_27_0    | 4   | 0.7397 | 0.99936153 | 0.7392 | 0 | 0 | 0 | 1 Ref      |
| AY722806 | Unassigned | Unassigned | Unassigned | 454_0  | Clustered           | 4 VC_454_0   | 4   | 1      | 1          | 1      | 0 | 0 | 0 | 1 Ref      |
| AY730274 | Unassigned | Unassigned | Unassigned | 654_0  | Clustered           | 115 VC_654_0 | 115 | 0.7303 | 1          | 0.7303 | 0 | 0 | 0 | 0.8764 Ref |
| AY739900 | Unassigned | Unassigned | Unassigned | 657_0  | Clustered           | 7 VC_657_0   | 7   | 0.8495 | 1          | 0.8495 | 0 | 0 | 0 | 1 Ref      |
| AY751298 | Unassigned | Unassigned | Unassigned | 373_0  | Clustered           | 358 VC_373_0 | 358 | 0.9614 | 1          | 0.9614 | 0 | 0 | 0 | 1 Ref      |
| AY769964 | Unassigned | Unassigned | Unassigned | 206_0  | Clustered           | 28 VC_206_0  | 28  | 0.2427 | 0.99971175 | 0.2426 | 0 | 0 | 0 | 1 Ref      |
| AY772740 | Unassigned | Unassigned | Unassigned | 661_2  | Clustered           | 6 VC_661_2   | 6   | 0.1674 | 1          | 0.1674 | 0 | 1 | 0 | 1 Ref      |
| AY848684 | Unassigned | Unassigned | Unassigned | 622_0  | Clustered           | 9 VC_622_0   | 9   | 0.9922 | 0.99999994 | 0.9922 | 0 | 0 | 0 | 1 Ref      |
| AY848685 | Unassigned | Unassigned | Unassigned | 622_0  | Clustered           | 9 VC_622_0   | 9   | 0.9922 | 0.99999994 | 0.9922 | 0 | 0 | 0 | 1 Ref      |
| AY848686 | Unassigned | Unassigned | Unassigned | 622_0  | Clustered           | 9 VC_622_0   | 9   | 0.9922 | 0.99999994 | 0.9922 | 0 | 0 | 0 | 1 Ref      |
| AY848687 | Unassigned | Unassigned | Unassigned | 622_0  | Clustered           | 9 VC_622_0   | 9   | 0.9922 | 0.99999994 | 0.9922 | 0 | 0 | 0 | 1 Ref      |
| AY848688 | Unassigned | Unassigned | Unassigned | 622_0  | Clustered           | 9 VC_622_0   | 9   | 0.9922 | 0.99999994 | 0.9922 | 0 | 0 | 0 | 1 Ref      |
| AY848689 | Unassigned | Unassigned | Unassigned | 622_0  | Clustered           | 9 VC_622_0   | 9   | 0.9922 | 0.99999994 | 0.9922 | 0 | 0 | 0 | 1 Ref      |
| AY855346 | Unassigned | Unassigned | Unassigned | 140_0  | Clustered           | 2 VC_140_0   | 2   | 0.067  | 0.95523577 | 0.064  | 0 | 0 | 0 | 1 Ref      |
| AY939843 | Unassigned | Unassigned | Unassigned | 352_0  | Clustered           | 31 VC_352_0  | 31  | 0.9547 | 1          | 0.9547 | 0 | 0 | 0 | 1 Ref      |
| AY939844 | Unassigned | Unassigned | Unassigned | 446_9  | Clustered           | 3 VC_446_9   | 3   | 0.0365 | 0.99848173 | 0.0364 | 0 | 0 | 0 | 1 Ref      |
| AY940168 | Unassigned | Unassigned | Unassigned | 674_2  | Clustered           | 3 VC_674_2   | 3   | 0.0227 | 0.99860756 | 0.0227 | 0 | 0 | 0 | 1 Ref      |
| AY950802 | Unassigned | Unassigned | Unassigned | 684_0  | Clustered           | 4 VC_684_0   | 4   | 1      | 1          | 1      | 0 | 0 | 0 | 1 Ref      |
| AY954949 | Unassigned | Unassigned | Unassigned | 98_0   | Clustered           | 30 VC_98_0   | 30  | 0.7175 | 1          | 0.7175 | 0 | 0 | 0 | 1 Ref      |
| AY954951 | Unassigned | Unassigned | Unassigned | 9_0    | Clustered           | 38 VC_9_0    | 38  | 0.4859 | 1          | 0.4859 | 0 | 0 | 0 | 1 Ref      |
| AY954952 | Unassigned | Unassigned | Unassigned | 9_0    | Clustered           | 38 VC_9_0    | 38  | 0.4859 | 1          | 0.4859 | 0 | 0 | 0 | 1 Ref      |
| AY954953 | Unassigned | Unassigned | Unassigned | 9_0    | Clustered           | 38 VC_9_0    | 38  | 0.4859 | 1          | 0.4859 | 0 | 0 | 0 | 1 Ref      |
| AY954954 | Unassigned | Unassigned | Unassigned | 15_1   | Clustered           | 9 VC_15_1    | 9   | 0.1817 | 1          | 0.1817 | 0 | 0 | 0 | 0.9167 Ref |
| AY954955 | Unassigned | Unassigned | Unassigned | 8_0    | Clustered           | 58 VC_8_0    | 58  | 0.8285 | 1          | 0.8285 | 0 | 0 | 0 | 0.9946 Ref |
| AY954956 | Unassigned | Unassigned | Unassigned | 8_0    | Clustered           | 58 VC_8_0    | 58  | 0.8285 | 1          | 0.8285 | 0 | 0 | 0 | 0.9946 Ref |
| AY954957 | Unassigned | Unassigned | Unassigned | 8_0    | Clustered           | 58 VC_8_0    | 58  | 0.8285 | 1          | 0.8285 | 0 | 0 | 0 | 0.9946 Ref |
| AY954960 | Unassigned | Unassigned | Unassigned | 12_0   | Clustered           | 21 VC_12_0   | 21  | 0.2262 | 1          | 0.2262 | 0 | 0 | 0 | 0.9571 Ref |
| AY954961 | Unassigned | Unassigned | Unassigned | 12_0   | Clustered           | 21 VC_12_0   | 21  | 0.2262 | 1          | 0.2262 | 0 | 0 | 0 | 0.9571 Ref |
| AY954962 | Unassigned | Unassigned | Unassigned | 12_2   | Clustered           | 19 VC_12_2   | 19  | 0.2009 | 1          | 0.2009 | 0 | 0 | 0 | 1 Ref      |
| AY954963 | Unassigned | Unassigned | Unassigned | 12_2   | Clustered           | 19 VC_12_2   | 19  | 0.2009 | 1          | 0.2009 | 0 | 0 | 0 | 1 Ref      |
| AY954964 | Unassigned | Unassigned | Unassigned | 12_2   | Clustered           | 19 VC_12_2   | 19  | 0.2009 | 1          | 0.2009 | 0 | 0 | 0 | 1 Ref      |
| AY954965 | Unassigned | Unassigned | Unassigned | 12_2   | Clustered           | 19 VC_12_2   | 19  | 0.2009 | 1          | 0.2009 | 0 | 0 | 0 | 1 Ref      |
| AY954966 | Unassigned | Unassigned | Unassigned | 12_2   | Clustered           | 19 VC_12_2   | 19  | 0.2009 | 1          | 0.2009 | 0 | 0 | 0 | 1 Ref      |
| AY954967 | Unassigned | Unassigned | Unassigned | 12_2   | Clustered           | 19 VC_12_2   | 19  | 0.2009 | 1          | 0.2009 | 0 | 0 | 0 | 1 Ref      |
| AY954968 | Unassigned | Unassigned | Unassigned | 12_2   | Clustered           | 19 VC_12_2   | 19  | 0.2009 | 1          | 0.2009 | 0 | 0 | 0 | 1 Ref      |
| AY954969 | Unassigned | Unassigned | Unassigned | 155_8  | Clustered           | 66 VC_155_8  | 66  | 0.4537 | 1          | 0.4537 | 0 | 0 | 0 | 0.8182 Ref |
| AY962392 | Unassigned | Unassigned | Unassigned | 619_1  | Clustered           | 7 VC_619_1   | 7   | 0.1834 | 0.99999997 | 0.1834 | 0 | 0 | 0 | 1 Ref      |
| AY967407 | Unassigned | Unassigned | Unassigned | 687_1  | Clustered           | 10 VC_687_1  | 10  | 0.1263 | 1          | 0.1263 | 0 | 0 | 0 | 0.9778 Ref |
| BIU32222 | Unassigned | Unassigned | Unassigned | 235_0  | Clustered           | 60 VC_235_0  | 60  | 0.9413 | 1          | 0.9413 | 0 | 0 | 0 | 1 Ref      |
| BCP1     | Unassigned | Unassigned | Unassigned | 690_0  | Clustered           | 12 VC_690_0  | 12  | 1      | 1          | 1      | 0 | 0 | 0 | 1 Ref      |
| BHU24159 | Unassigned | Unassigned | Unassigned | 5_0    | Clustered           | 27 VC_5_0    | 27  | 0.9599 | 1          | 0.9599 | 0 | 0 | 0 | 1 Ref      |
| BK000583 | Unassigned | Unassigned | Unassigned | 30_1   | Clustered           | 53 VC_30_1   | 53  | 0.7151 | 1          | 0.7151 | 0 | 0 | 0 | 0.9325 Ref |
| BK010471 | Unassigned | Unassigned | Unassigned | 691_0  | Clustered           | 18 VC_691_0  | 18  | 0.6865 | 1          | 0.6865 | 0 | 0 | 0 | 0.9477 Ref |
| BK010646 | Unassigned | Unassigned | Unassigned | 695_0  | Clustered           | 17 VC_695_0  | 17  | 0.7188 | 1          | 0.7188 | 0 | 0 | 0 | 0.9044 Ref |
| BK013337 | Unassigned | Unassigned | Unassigned | 559_0  | Clustered           | 3 VC_559_0   | 3   | 1      | 1          | 1      | 0 | 0 | 0 | 1 Ref      |
| BK013338 | Unassigned | Unassigned | Unassigned | 559_0  | Clustered           | 3 VC_559_0   | 3   | 1      | 1          | 1      | 0 | 0 | 0 | 1 Ref      |



|                 |            |            |            |        |                     |              |     |        |            |        |   |   |   |            |
|-----------------|------------|------------|------------|--------|---------------------|--------------|-----|--------|------------|--------|---|---|---|------------|
| BK013345        | Unassigned | Unassigned | Unassigned | 697_0  | Clustered           | 3 VC_697_0   | 3   | 0.9312 | 0.81445332 | 0.7584 | 0 | 0 | 0 | 1 Ref      |
| BK013346        | Unassigned | Unassigned | Unassigned | 697_0  | Clustered           | 3 VC_697_0   | 3   | 0.9312 | 0.81445332 | 0.7584 | 0 | 0 | 0 | 1 Ref      |
| BK013347        | Unassigned | Unassigned | Unassigned | 697_0  | Clustered           | 3 VC_697_0   | 3   | 0.9312 | 0.81445332 | 0.7584 | 0 | 0 | 0 | 1 Ref      |
| BK059895        | Unassigned | Unassigned | Unassigned | 698_0  | Clustered           | 2 VC_698_0   | 2   | 1      | 1          | 1      | 0 | 0 | 0 | 1 Ref      |
| BK061308        | Unassigned | Unassigned | Unassigned | 699_0  | Clustered           | 5 VC_699_0   | 5   | 0.8925 | 0.99999977 | 0.8925 | 0 | 0 | 0 | 1 Ref      |
| BK061309        | Unassigned | Unassigned | Unassigned | 699_0  | Clustered           | 5 VC_699_0   | 5   | 0.8925 | 0.99999977 | 0.8925 | 0 | 0 | 0 | 1 Ref      |
| BK061310        | Unassigned | Unassigned | Unassigned | 699_0  | Clustered           | 5 VC_699_0   | 5   | 0.8925 | 0.99999977 | 0.8925 | 0 | 0 | 0 | 1 Ref      |
| BK061311        | Unassigned | Unassigned | Unassigned | 699_0  | Clustered           | 5 VC_699_0   | 5   | 0.8925 | 0.99999977 | 0.8925 | 0 | 0 | 0 | 1 Ref      |
| BK061312        | Unassigned | Unassigned | Unassigned | 699_0  | Clustered           | 5 VC_699_0   | 5   | 0.8925 | 0.99999977 | 0.8925 | 0 | 0 | 0 | 1 Ref      |
| C2PVCG          | Unassigned | Unassigned | Unassigned | 706_0  | Clustered           | 52 VC_706_0  | 52  | 0.9787 | 1          | 0.9787 | 0 | 0 | 0 | 1 Ref      |
| CAJCZJ010000002 | Unassigned | Unassigned | Unassigned | 707_1  | Clustered           | 5 VC_707_1   | 5   | 0.4294 | 0.99999994 | 0.4294 | 0 | 0 | 0 | 1 Ref      |
| CAJDXJ010000002 | Unassigned | Unassigned | Unassigned | 711_0  | Clustered           | 48 VC_711_0  | 48  | 0.8217 | 1          | 0.8217 | 0 | 0 | 0 | 1 Ref      |
| CAJDIY010000002 | Unassigned | Unassigned | Unassigned | 93_0   | Clustered           | 22 VC_93_0   | 22  | 0.5285 | 1          | 0.5285 | 0 | 0 | 0 | 1 Ref      |
| CAJDIJ010000002 | Unassigned | Unassigned | Unassigned | 93_0   | Clustered           | 22 VC_93_0   | 22  | 0.5285 | 1          | 0.5285 | 0 | 0 | 0 | 1 Ref      |
| CAJDKA010000002 | Unassigned | Unassigned | Unassigned | 94_0   | Clustered           | 22 VC_94_0   | 22  | 0.5602 | 1          | 0.5602 | 0 | 0 | 0 | 1 Ref      |
| CAJDKF010000002 | Unassigned | Unassigned | Unassigned | 711_0  | Clustered           | 48 VC_711_0  | 48  | 0.8217 | 1          | 0.8217 | 0 | 0 | 0 | 1 Ref      |
| CAKLQA020000001 | Unassigned | Unassigned | Unassigned | 441_1  | Clustered           | 8 VC_441_1   | 8   | 0.5443 | 1          | 0.5443 | 0 | 0 | 0 | 0.9643 Ref |
| CAKLQA020000002 | Unassigned | Unassigned | Unassigned | 688_0  | Clustered           | 2 VC_688_0   | 2   | 0.6866 | 0.72985431 | 0.5011 | 0 | 0 | 0 | 1 Ref      |
| CAKLQA020000003 | Unassigned | Unassigned | Unassigned | 634_0  | Clustered           | 2 VC_634_0   | 2   | 0.2597 | 0.94405832 | 0.2451 | 0 | 0 | 0 | 1 Ref      |
| CAKLQB020000001 | Unassigned | Unassigned | Unassigned | 714_0  | Clustered           | 71 VC_714_0  | 71  | 0.935  | 1          | 0.935  | 0 | 0 | 0 | 1 Ref      |
| CAKLQC020000001 | Unassigned | Unassigned | Unassigned | 510_1  | Clustered           | 20 VC_510_1  | 20  | 0.4172 | 1          | 0.4172 | 0 | 0 | 0 | 1 Ref      |
| CAKLQD020000001 | Unassigned | Unassigned | Unassigned | 510_1  | Clustered           | 20 VC_510_1  | 20  | 0.4172 | 1          | 0.4172 | 0 | 0 | 0 | 1 Ref      |
| CAKLQE020000001 | Unassigned | Unassigned | Unassigned | 716_2  | Clustered/Singleton | 1 VC_716_2   | 1   | 0      | 1          | 0      | 0 | 0 | 0 | 1 Ref      |
| CAKLQG020000001 | Unassigned | Unassigned | Unassigned | 714_0  | Clustered           | 71 VC_714_0  | 71  | 0.935  | 1          | 0.935  | 0 | 0 | 0 | 1 Ref      |
| CMU41758        | Unassigned | Unassigned | Unassigned | 205_0  | Clustered           | 5 VC_205_0   | 5   | 0.1325 | 0.84698401 | 0.1122 | 0 | 0 | 0 | 1 Ref      |
| CP000622        | Unassigned | Unassigned | Unassigned | 257_0  | Clustered           | 3 VC_257_0   | 3   | 0.2099 | 0.99831999 | 0.2095 | 0 | 0 | 0 | 1 Ref      |
| CP000623        | Unassigned | Unassigned | Unassigned | 3_0    | Clustered           | 17 VC_3_0    | 17  | 0.5615 | 1          | 0.5615 | 0 | 0 | 0 | 1 Ref      |
| CP000624        | Unassigned | Unassigned | Unassigned | 3_0    | Clustered           | 17 VC_3_0    | 17  | 0.5615 | 1          | 0.5615 | 0 | 0 | 0 | 1 Ref      |
| CP000625        | Unassigned | Unassigned | Unassigned | 365_0  | Clustered           | 6 VC_365_0   | 6   | 0.5395 | 1          | 0.5395 | 0 | 0 | 0 | 1 Ref      |
| CP000711        | Unassigned | Unassigned | Unassigned | 32_1   | Clustered           | 16 VC_32_1   | 16  | 0.1962 | 1          | 0.1962 | 0 | 0 | 0 | 0.8333 Ref |
| CP000917        | Unassigned | Unassigned | Unassigned | 199_17 | Clustered           | 4 VC_199_17  | 4   | 0.0165 | 0.99893269 | 0.0165 | 0 | 0 | 0 | 0.8333 Ref |
| CP002495        | Unassigned | Unassigned | Unassigned | 722_0  | Clustered           | 2 VC_722_0   | 2   | 1      | 1          | 1      | 0 | 0 | 0 | 1 Ref      |
| CP004084        | Unassigned | Unassigned | Unassigned | 310_0  | Clustered           | 155 VC_310_0 | 155 | 0.9979 | 1          | 0.9979 | 0 | 0 | 0 | 1 Ref      |
| CP006891        | Unassigned | Unassigned | Unassigned | 57_0   | Clustered           | 3 VC_57_0    | 3   | 0.2761 | 0.99850726 | 0.2757 | 0 | 0 | 0 | 1 Ref      |
| CP008753        | Unassigned | Unassigned | Unassigned | 3_0    | Clustered           | 17 VC_3_0    | 17  | 0.5615 | 1          | 0.5615 | 0 | 0 | 0 | 1 Ref      |
| CP011970        | Unassigned | Unassigned | Unassigned | 487_2  | Clustered           | 2 VC_487_2   | 2   | 0.1024 | 0.94551181 | 0.0968 | 0 | 0 | 0 | 1 Ref      |
| CP013282        | Unassigned | Unassigned | Unassigned | 435_0  | Clustered           | 7 VC_435_0   | 7   | 0.9041 | 0.9998143  | 0.9039 | 0 | 0 | 0 | 1 Ref      |
| CP013974        | Unassigned | Unassigned | Unassigned | 437_0  | Clustered           | 3 VC_437_0   | 3   | 0.107  | 0.99803965 | 0.1068 | 0 | 0 | 0 | 1 Ref      |
| CP017905        | Unassigned | Unassigned | Unassigned | 16_0   | Clustered           | 12 VC_16_0   | 12  | 0.6601 | 1          | 0.6601 | 0 | 0 | 0 | 1 Ref      |
| CP017906        | Unassigned | Unassigned | Unassigned | 16_0   | Clustered           | 12 VC_16_0   | 12  | 0.6601 | 1          | 0.6601 | 0 | 0 | 0 | 1 Ref      |
| CP019275        | Unassigned | Unassigned | Unassigned | 6_0    | Clustered           | 44 VC_6_0    | 44  | 0.9068 | 1          | 0.9068 | 0 | 0 | 0 | 1 Ref      |
| CP023680        | Unassigned | Unassigned | Unassigned | 57_0   | Clustered           | 3 VC_57_0    | 3   | 0.2761 | 0.99850726 | 0.2757 | 0 | 0 | 0 | 1 Ref      |
| CP023686        | Unassigned | Unassigned | Unassigned | 57_0   | Clustered           | 3 VC_57_0    | 3   | 0.2761 | 0.99850726 | 0.2757 | 0 | 0 | 0 | 1 Ref      |
| CP025874        | Unassigned | Unassigned | Unassigned | 236_0  | Clustered           | 32 VC_236_0  | 32  | 0.9115 | 1          | 0.9115 | 0 | 0 | 0 | 1 Ref      |
| CP025900        | Unassigned | Unassigned | Unassigned | 6_0    | Clustered           | 44 VC_6_0    | 44  | 0.9068 | 1          | 0.9068 | 0 | 0 | 0 | 1 Ref      |
| CP025901        | Unassigned | Unassigned | Unassigned | 236_0  | Clustered           | 32 VC_236_0  | 32  | 0.9115 | 1          | 0.9115 | 0 | 0 | 0 | 1 Ref      |
| CP025923        | Unassigned | Unassigned | Unassigned | 236_0  | Clustered           | 32 VC_236_0  | 32  | 0.9115 | 1          | 0.9115 | 0 | 0 | 0 | 1 Ref      |
| CP027117        | Unassigned | Unassigned | Unassigned | 735_1  | Clustered/Singleton | 1 VC_735_1   | 1   | 0      | 1          | 0      | 0 | 0 | 0 | 1 Ref      |
| CP038007        | Unassigned | Unassigned | Unassigned | 37_0   | Clustered           | 4 VC_37_0    | 4   | 0.4325 | 0.99998062 | 0.4325 | 0 | 0 | 0 | 1 Ref      |
| CP045566        | Unassigned | Unassigned | Unassigned | 736_0  | Clustered           | 9 VC_736_0   | 9   | 1      | 1          | 1      | 0 | 0 | 0 | 1 Ref      |
| CP051272        | Unassigned | Unassigned | Unassigned | 30_1   | Clustered           | 53 VC_30_1   | 53  | 0.7151 | 1          | 0.7151 | 0 | 0 | 0 | 0.9325 Ref |
| CP051278        | Unassigned | Unassigned | Unassigned | 30_1   | Clustered           | 53 VC_30_1   | 53  | 0.7151 | 1          | 0.7151 | 0 | 0 | 0 | 0.9325 Ref |
| CP051279        | Unassigned | Unassigned | Unassigned | 30_1   | Clustered           | 53 VC_30_1   | 53  | 0.7151 | 1          | 0.7151 | 0 | 0 | 0 | 0.9325 Ref |
| CP051285        | Unassigned | Unassigned | Unassigned | 30_1   | Clustered           | 53 VC_30_1   | 53  | 0.7151 | 1          | 0.7151 | 0 | 0 | 0 | 0.9325 Ref |
| CP051288        | Unassigned | Unassigned | Unassigned | 30_1   | Clustered           | 53 VC_30_1   | 53  | 0.7151 | 1          | 0.7151 | 0 | 0 | 0 | 0.9325 Ref |
| CP052639        | Unassigned | Unassigned | Unassigned | 236_0  | Clustered           | 32 VC_236_0  | 32  | 0.9115 | 1          | 0.9115 | 0 | 0 | 0 | 1 Ref      |
| CP053388        | Unassigned | Unassigned | Unassigned | 738_0  | Clustered           | 9 VC_738_0   | 9   | 0.7116 | 1          | 0.7116 | 0 | 0 | 0 | 1 Ref      |
| CP054387        | Unassigned | Unassigned | Unassigned | 738_0  | Clustered           | 9 VC_738_0   | 9   | 0.7116 | 1          | 0.7116 | 0 | 0 | 0 | 1 Ref      |
| CP058330        | Unassigned | Unassigned | Unassigned | 738_0  | Clustered           | 9 VC_738_0   | 9   | 0.7116 | 1          | 0.7116 | 0 | 0 | 0 | 1 Ref      |
| CP059058        | Unassigned | Unassigned | Unassigned | 610_0  | Clustered           | 14 VC_610_0  | 14  | 0.5159 | 1          | 0.5159 | 0 | 0 | 0 | 1 Ref      |
| CP060690        | Unassigned | Unassigned | Unassigned | 745_0  | Clustered           | 9 VC_745_0   | 9   | 0.9955 | 0.99999771 | 0.9955 | 0 | 0 | 0 | 1 Ref      |
| CP062422        | Unassigned | Unassigned | Unassigned | 12_0   | Clustered           | 21 VC_12_0   | 21  | 0.2262 | 1          | 0.2262 | 0 | 0 | 0 | 0.9571 Ref |
| CP062426        | Unassigned | Unassigned | Unassigned | 7_0    | Clustered           | 28 VC_7_0    | 28  | 0.389  | 1          | 0.389  | 0 | 0 | 0 | 0.9947 Ref |
| CP062427        | Unassigned | Unassigned | Unassigned | 9_0    | Clustered           | 38 VC_9_0    | 38  | 0.4859 | 1          | 0.4859 | 0 | 0 | 0 | 1 Ref      |
| CP062430        | Unassigned | Unassigned | Unassigned | 10_0   | Clustered           | 25 VC_10_0   | 25  | 0.3437 | 1          | 0.3437 | 0 | 0 | 0 | 0.9733 Ref |
| CP062434        | Unassigned | Unassigned | Unassigned | 8_0    | Clustered           | 58 VC_8_0    | 58  | 0.8285 | 1          | 0.8285 | 0 | 0 | 0 | 0.9946 Ref |
| CP062435        | Unassigned | Unassigned | Unassigned | 7_0    | Clustered           | 28 VC_7_0    | 28  | 0.389  | 1          | 0.389  | 0 | 0 | 0 | 0.9947 Ref |
| CP062436        | Unassigned | Unassigned | Unassigned | 10_0   | Clustered           | 25 VC_10_0   | 25  | 0.3437 | 1          | 0.3437 | 0 | 0 | 0 | 0.9733 Ref |
| CP062442        | Unassigned | Unassigned | Unassigned | 8_0    | Clustered           | 58 VC_8_0    | 58  | 0.8285 | 1          | 0.8285 | 0 | 0 | 0 | 0.9946 Ref |
| CP062444        | Unassigned | Unassigned | Unassigned | 8_0    | Clustered           | 58 VC_8_0    | 58  | 0.8285 | 1          | 0.8285 | 0 | 0 | 0 | 0.9946 Ref |
| CP062445        | Unassigned | Unassigned | Unassigned | 7_0    | Clustered           | 28 VC_7_0    | 28  | 0.389  | 1          | 0.389  | 0 | 0 | 0 | 0.9947 Ref |
| CP062447        | Unassigned | Unassigned | Unassigned | 10_0   | Clustered           | 25 VC_10_0   | 25  | 0.3437 | 1          | 0.3437 | 0 | 0 | 0 | 0.9733 Ref |
| CP062451        | Unassigned | Unassigned | Unassigned | 9_0    | Clustered           | 38 VC_9_0    | 38  | 0.4859 | 1          | 0.4859 | 0 | 0 | 0 | 1 Ref      |
| CP062454        | Unassigned | Unassigned | Unassigned | 9_0    | Clustered           | 38 VC_9_0    | 38  | 0.4859 | 1          | 0.4859 | 0 | 0 | 0 | 1 Ref      |
| CP062457        | Unassigned | Unassigned | Unassigned | 7_0    | Clustered           | 28 VC_7_0    | 28  | 0.389  | 1          | 0.389  | 0 | 0 | 0 | 0.9947 Ref |
| CP062461        | Unassigned | Unassigned | Unassigned | 8_0    | Clustered           | 58 VC_8_0    | 58  | 0.8285 | 1          | 0.8285 | 0 | 0 | 0 | 0.9946 Ref |
| CP062462        | Unassigned | Unassigned | Unassigned | 12_0   | Clustered           | 21 VC_12_0   | 21  | 0.2262 | 1          | 0.2262 | 0 | 0 | 0 | 0.9571 Ref |
| CP062992        | Unassigned | Unassigned | Unassigned | 509_0  | Clustered           | 36 VC_509_0  | 36  | 0.5291 | 1          | 0.5291 | 0 | 0 | 0 | 0.9714 Ref |
| CP067347        | Unassigned | Unassigned | Unassigned | 487_4  | Clustered/Singleton | 1 VC_487_4   | 1   | 0      | 1          | 0      | 0 | 0 | 0 | 1 Ref      |
| CP067352        | Unassigned | Unassigned | Unassigned | 487_0  | Clustered/Singleton | 1 VC_487_0   | 1   | 0      | 1          | 0      | 0 | 0 | 0 | 1 Ref      |
| CP069347        | Unassigned | Unassigned | Unassigned | 666_0  | Clustered           | 11 VC_666_0  | 11  | 0.5822 | 1          | 0.5822 | 0 | 0 | 0 | 1 Ref      |



|          |            |            |            |       |                     |     |          |     |        |            |        |   |   |   |            |
|----------|------------|------------|------------|-------|---------------------|-----|----------|-----|--------|------------|--------|---|---|---|------------|
| CP069348 | Unassigned | Unassigned | Unassigned | 487_1 | Clustered/Singleton | 1   | VC_487_1 | 1   | 0      | 1          | 0      | 0 | 0 | 0 | 1 Ref      |
| CP071049 | Unassigned | Unassigned | Unassigned | 12_0  | Clustered           | 21  | VC_12_0  | 21  | 0.2262 | 1          | 0.2262 | 0 | 0 | 0 | 0.9571 Ref |
| CP072507 | Unassigned | Unassigned | Unassigned | 37_0  | Clustered           | 4   | VC_37_0  | 4   | 0.4325 | 0.99998062 | 0.4325 | 0 | 0 | 0 | 1 Ref      |
| CP084202 | Unassigned | Unassigned | Unassigned | 751_0 | Clustered           | 2   | VC_751_0 | 2   | 0.6768 | 0.87921671 | 0.595  | 0 | 0 | 0 | 1 Ref      |
| CP091911 | Unassigned | Unassigned | Unassigned | 722_0 | Clustered           | 2   | VC_722_0 | 2   | 1      | 1          | 1      | 0 | 0 | 0 | 1 Ref      |
| CP101890 | Unassigned | Unassigned | Unassigned | 738_0 | Clustered           | 9   | VC_738_0 | 9   | 0.7116 | 1          | 0.7116 | 0 | 0 | 0 | 1 Ref      |
| CP101896 | Unassigned | Unassigned | Unassigned | 738_0 | Clustered           | 9   | VC_738_0 | 9   | 0.7116 | 1          | 0.7116 | 0 | 0 | 0 | 1 Ref      |
| D89074   | Unassigned | Unassigned | Unassigned | 16_0  | Clustered           | 12  | VC_16_0  | 12  | 0.6601 | 1          | 0.6601 | 0 | 0 | 0 | 1 Ref      |
| DQ003260 | Unassigned | Unassigned | Unassigned | 30_1  | Clustered           | 53  | VC_30_1  | 53  | 0.7151 | 1          | 0.7151 | 0 | 0 | 0 | 0.9325 Ref |
| DQ003637 | Unassigned | Unassigned | Unassigned | 392_0 | Clustered           | 9   | VC_392_0 | 9   | 0.7527 | 1          | 0.7527 | 0 | 0 | 0 | 1 Ref      |
| DQ003638 | Unassigned | Unassigned | Unassigned | 753_0 | Clustered           | 26  | VC_753_0 | 26  | 0.9562 | 1          | 0.9562 | 0 | 0 | 0 | 1 Ref      |
| DQ003639 | Unassigned | Unassigned | Unassigned | 393_0 | Clustered           | 5   | VC_393_0 | 5   | 0.4703 | 0.99999992 | 0.4703 | 0 | 0 | 0 | 0.9 Ref    |
| DQ003641 | Unassigned | Unassigned | Unassigned | 755_0 | Clustered           | 2   | VC_755_0 | 2   | 0.2367 | 0.9499739  | 0.2249 | 0 | 0 | 0 | 1 Ref      |
| DQ003642 | Unassigned | Unassigned | Unassigned | 394_0 | Clustered           | 3   | VC_394_0 | 3   | 0.1582 | 0.99545803 | 0.1575 | 0 | 0 | 0 | 1 Ref      |
| DQ004855 | Unassigned | Unassigned | Unassigned | 753_0 | Clustered           | 26  | VC_753_0 | 26  | 0.9562 | 1          | 0.9562 | 0 | 0 | 0 | 1 Ref      |
| DQ029335 | Unassigned | Unassigned | Unassigned | 83_0  | Clustered           | 24  | VC_83_0  | 24  | 0.7345 | 1          | 0.7345 | 0 | 0 | 0 | 1 Ref      |
| DQ054536 | Unassigned | Unassigned | Unassigned | 210_0 | Clustered           | 105 | VC_210_0 | 105 | 0.4076 | 1          | 0.4076 | 0 | 0 | 0 | 0.7766 Ref |
| DQ079870 | Unassigned | Unassigned | Unassigned | 760_0 | Clustered           | 15  | VC_760_0 | 15  | 1      | 1          | 1      | 0 | 0 | 0 | 1 Ref      |
| DQ079871 | Unassigned | Unassigned | Unassigned | 760_0 | Clustered           | 15  | VC_760_0 | 15  | 1      | 1          | 1      | 0 | 0 | 0 | 1 Ref      |
| DQ079872 | Unassigned | Unassigned | Unassigned | 760_0 | Clustered           | 15  | VC_760_0 | 15  | 1      | 1          | 1      | 0 | 0 | 0 | 1 Ref      |
| DQ079873 | Unassigned | Unassigned | Unassigned | 760_0 | Clustered           | 15  | VC_760_0 | 15  | 1      | 1          | 1      | 0 | 0 | 0 | 1 Ref      |
| DQ079874 | Unassigned | Unassigned | Unassigned | 760_0 | Clustered           | 15  | VC_760_0 | 15  | 1      | 1          | 1      | 0 | 0 | 0 | 1 Ref      |
| DQ079875 | Unassigned | Unassigned | Unassigned | 760_0 | Clustered           | 15  | VC_760_0 | 15  | 1      | 1          | 1      | 0 | 0 | 0 | 1 Ref      |
| DQ079876 | Unassigned | Unassigned | Unassigned | 760_0 | Clustered           | 15  | VC_760_0 | 15  | 1      | 1          | 1      | 0 | 0 | 0 | 1 Ref      |
| DQ079878 | Unassigned | Unassigned | Unassigned | 760_0 | Clustered           | 15  | VC_760_0 | 15  | 1      | 1          | 1      | 0 | 0 | 0 | 1 Ref      |
| DQ079879 | Unassigned | Unassigned | Unassigned | 760_0 | Clustered           | 15  | VC_760_0 | 15  | 1      | 1          | 1      | 0 | 0 | 0 | 1 Ref      |
| DQ079880 | Unassigned | Unassigned | Unassigned | 310_0 | Clustered           | 155 | VC_310_0 | 155 | 0.9979 | 1          | 0.9979 | 0 | 0 | 0 | 1 Ref      |
| DQ079881 | Unassigned | Unassigned | Unassigned | 310_0 | Clustered           | 155 | VC_310_0 | 155 | 0.9979 | 1          | 0.9979 | 0 | 0 | 0 | 1 Ref      |
| DQ079882 | Unassigned | Unassigned | Unassigned | 310_0 | Clustered           | 155 | VC_310_0 | 155 | 0.9979 | 1          | 0.9979 | 0 | 0 | 0 | 1 Ref      |
| DQ079883 | Unassigned | Unassigned | Unassigned | 310_0 | Clustered           | 155 | VC_310_0 | 155 | 0.9979 | 1          | 0.9979 | 0 | 0 | 0 | 1 Ref      |
| DQ079884 | Unassigned | Unassigned | Unassigned | 310_0 | Clustered           | 155 | VC_310_0 | 155 | 0.9979 | 1          | 0.9979 | 0 | 0 | 0 | 1 Ref      |
| DQ079885 | Unassigned | Unassigned | Unassigned | 310_0 | Clustered           | 155 | VC_310_0 | 155 | 0.9979 | 1          | 0.9979 | 0 | 0 | 0 | 1 Ref      |
| DQ079886 | Unassigned | Unassigned | Unassigned | 310_0 | Clustered           | 155 | VC_310_0 | 155 | 0.9979 | 1          | 0.9979 | 0 | 0 | 0 | 1 Ref      |
| DQ079887 | Unassigned | Unassigned | Unassigned | 310_0 | Clustered           | 155 | VC_310_0 | 155 | 0.9979 | 1          | 0.9979 | 0 | 0 | 0 | 1 Ref      |
| DQ079888 | Unassigned | Unassigned | Unassigned | 310_0 | Clustered           | 155 | VC_310_0 | 155 | 0.9979 | 1          | 0.9979 | 0 | 0 | 0 | 1 Ref      |
| DQ079889 | Unassigned | Unassigned | Unassigned | 310_0 | Clustered           | 155 | VC_310_0 | 155 | 0.9979 | 1          | 0.9979 | 0 | 0 | 0 | 1 Ref      |
| DQ079890 | Unassigned | Unassigned | Unassigned | 310_0 | Clustered           | 155 | VC_310_0 | 155 | 0.9979 | 1          | 0.9979 | 0 | 0 | 0 | 1 Ref      |
| DQ079891 | Unassigned | Unassigned | Unassigned | 310_0 | Clustered           | 155 | VC_310_0 | 155 | 0.9979 | 1          | 0.9979 | 0 | 0 | 0 | 1 Ref      |
| DQ079892 | Unassigned | Unassigned | Unassigned | 310_0 | Clustered           | 155 | VC_310_0 | 155 | 0.9979 | 1          | 0.9979 | 0 | 0 | 0 | 1 Ref      |
| DQ079893 | Unassigned | Unassigned | Unassigned | 310_0 | Clustered           | 155 | VC_310_0 | 155 | 0.9979 | 1          | 0.9979 | 0 | 0 | 0 | 1 Ref      |
| DQ079894 | Unassigned | Unassigned | Unassigned | 310_0 | Clustered           | 155 | VC_310_0 | 155 | 0.9979 | 1          | 0.9979 | 0 | 0 | 0 | 1 Ref      |
| DQ079895 | Unassigned | Unassigned | Unassigned | 310_0 | Clustered           | 155 | VC_310_0 | 155 | 0.9979 | 1          | 0.9979 | 0 | 0 | 0 | 1 Ref      |
| DQ079896 | Unassigned | Unassigned | Unassigned | 373_0 | Clustered           | 358 | VC_373_0 | 358 | 0.9614 | 1          | 0.9614 | 0 | 0 | 0 | 1 Ref      |
| DQ079897 | Unassigned | Unassigned | Unassigned | 373_0 | Clustered           | 358 | VC_373_0 | 358 | 0.9614 | 1          | 0.9614 | 0 | 0 | 0 | 1 Ref      |
| DQ079899 | Unassigned | Unassigned | Unassigned | 373_0 | Clustered           | 358 | VC_373_0 | 358 | 0.9614 | 1          | 0.9614 | 0 | 0 | 0 | 1 Ref      |
| DQ079900 | Unassigned | Unassigned | Unassigned | 373_0 | Clustered           | 358 | VC_373_0 | 358 | 0.9614 | 1          | 0.9614 | 0 | 0 | 0 | 1 Ref      |
| DQ079901 | Unassigned | Unassigned | Unassigned | 373_0 | Clustered           | 358 | VC_373_0 | 358 | 0.9614 | 1          | 0.9614 | 0 | 0 | 0 | 1 Ref      |
| DQ079902 | Unassigned | Unassigned | Unassigned | 373_0 | Clustered           | 358 | VC_373_0 | 358 | 0.9614 | 1          | 0.9614 | 0 | 0 | 0 | 1 Ref      |
| DQ079903 | Unassigned | Unassigned | Unassigned | 373_0 | Clustered           | 358 | VC_373_0 | 358 | 0.9614 | 1          | 0.9614 | 0 | 0 | 0 | 1 Ref      |
| DQ079904 | Unassigned | Unassigned | Unassigned | 373_0 | Clustered           | 358 | VC_373_0 | 358 | 0.9614 | 1          | 0.9614 | 0 | 0 | 0 | 1 Ref      |
| DQ079906 | Unassigned | Unassigned | Unassigned | 373_0 | Clustered           | 358 | VC_373_0 | 358 | 0.9614 | 1          | 0.9614 | 0 | 0 | 0 | 1 Ref      |
| DQ079908 | Unassigned | Unassigned | Unassigned | 373_0 | Clustered           | 358 | VC_373_0 | 358 | 0.9614 | 1          | 0.9614 | 0 | 0 | 0 | 1 Ref      |
| DQ079909 | Unassigned | Unassigned | Unassigned | 373_0 | Clustered           | 358 | VC_373_0 | 358 | 0.9614 | 1          | 0.9614 | 0 | 0 | 0 | 1 Ref      |
| DQ085810 | Unassigned | Unassigned | Unassigned | 760_0 | Clustered           | 15  | VC_760_0 | 15  | 1      | 1          | 1      | 0 | 0 | 0 | 1 Ref      |
| DQ087285 | Unassigned | Unassigned | Unassigned | 3_0   | Clustered           | 17  | VC_3_0   | 17  | 0.5615 | 1          | 0.5615 | 0 | 0 | 0 | 1 Ref      |
| DQ111067 | Unassigned | Unassigned | Unassigned | 465_0 | Clustered           | 80  | VC_465_0 | 80  | 0.9988 | 1          | 0.9988 | 0 | 0 | 0 | 1 Ref      |
| DQ113772 | Unassigned | Unassigned | Unassigned | 425_0 | Clustered           | 40  | VC_425_0 | 40  | 0.8399 | 1          | 0.8399 | 0 | 0 | 0 | 0.9974 Ref |
| DQ114220 | Unassigned | Unassigned | Unassigned | 5_0   | Clustered           | 27  | VC_5_0   | 27  | 0.9599 | 1          | 0.9599 | 0 | 0 | 0 | 1 Ref      |
| DQ121662 | Unassigned | Unassigned | Unassigned | 469_0 | Clustered           | 18  | VC_469_0 | 18  | 0.4583 | 1          | 0.4583 | 0 | 0 | 0 | 1 Ref      |
| DQ126339 | Unassigned | Unassigned | Unassigned | 492_0 | Clustered           | 20  | VC_492_0 | 20  | 0.7887 | 1          | 0.7887 | 0 | 0 | 0 | 1 Ref      |
| DQ150593 | Unassigned | Unassigned | Unassigned | 719_0 | Clustered           | 16  | VC_719_0 | 16  | 0.728  | 1          | 0.728  | 0 | 0 | 0 | 1 Ref      |
| DQ163912 | Unassigned | Unassigned | Unassigned | 764_0 | Clustered           | 23  | VC_764_0 | 23  | 0.8194 | 1          | 0.8194 | 0 | 0 | 0 | 1 Ref      |
| DQ163913 | Unassigned | Unassigned | Unassigned | 766_0 | Clustered           | 40  | VC_766_0 | 40  | 0.7511 | 1          | 0.7511 | 0 | 0 | 0 | 1 Ref      |
| DQ163914 | Unassigned | Unassigned | Unassigned | 632_0 | Clustered           | 9   | VC_632_0 | 9   | 0.9524 | 1          | 0.9524 | 0 | 0 | 0 | 1 Ref      |
| DQ163915 | Unassigned | Unassigned | Unassigned | 772_0 | Clustered           | 9   | VC_772_0 | 9   | 0.4468 | 1          | 0.4468 | 0 | 0 | 0 | 1 Ref      |
| DQ163916 | Unassigned | Unassigned | Unassigned | 172_0 | Clustered           | 26  | VC_172_0 | 26  | 0.7909 | 1          | 0.7909 | 0 | 0 | 0 | 1 Ref      |
| DQ163917 | Unassigned | Unassigned | Unassigned | 81_0  | Clustered           | 41  | VC_81_0  | 41  | 0.5815 | 1          | 0.5815 | 0 | 0 | 0 | 0.9805 Ref |
| DQ222851 | Unassigned | Unassigned | Unassigned | 719_0 | Clustered           | 16  | VC_719_0 | 16  | 0.728  | 1          | 0.728  | 0 | 0 | 0 | 1 Ref      |
| DQ222853 | Unassigned | Unassigned | Unassigned | 719_0 | Clustered           | 16  | VC_719_0 | 16  | 0.728  | 1          | 0.728  | 0 | 0 | 0 | 1 Ref      |
| DQ222855 | Unassigned | Unassigned | Unassigned | 719_0 | Clustered           | 16  | VC_719_0 | 16  | 0.728  | 1          | 0.728  | 0 | 0 | 0 | 1 Ref      |
| DQ227763 | Unassigned | Unassigned | Unassigned | 210_0 | Clustered           | 105 | VC_210_0 | 105 | 0.4076 | 1          | 0.4076 | 0 | 0 | 0 | 0.7766 Ref |
| DQ227764 | Unassigned | Unassigned | Unassigned | 210_0 | Clustered           | 105 | VC_210_0 | 105 | 0.4076 | 1          | 0.4076 | 0 | 0 | 0 | 0.7766 Ref |
| DQ289555 | Unassigned | Unassigned | Unassigned | 719_0 | Clustered           | 16  | VC_719_0 | 16  | 0.728  | 1          | 0.728  | 0 | 0 | 0 | 1 Ref      |
| DQ289556 | Unassigned | Unassigned | Unassigned | 719_0 | Clustered           | 16  | VC_719_0 | 16  | 0.728  | 1          | 0.728  | 0 | 0 | 0 | 1 Ref      |
| DQ320509 | Unassigned | Unassigned | Unassigned | 275_0 | Clustered           | 6   | VC_275_0 | 6   | 0.6515 | 0.99999994 | 0.6515 | 0 | 0 | 0 | 0.9333 Ref |
| DQ386162 | Unassigned | Unassigned | Unassigned | 477_0 | Clustered           | 4   | VC_477_0 | 4   | 0.7825 | 0.99997292 | 0.7825 | 0 | 0 | 0 | 1 Ref      |
| DQ394807 | Unassigned | Unassigned | Unassigned | 271_0 | Clustered           | 12  | VC_271_0 | 12  | 0.4255 | 1          | 0.4255 | 0 | 0 | 0 | 1 Ref      |
| DQ394808 | Unassigned | Unassigned | Unassigned | 271_0 | Clustered           | 12  | VC_271_0 | 12  | 0.4255 | 1          | 0.4255 | 0 | 0 | 0 | 1 Ref      |
| DQ394809 | Unassigned | Unassigned | Unassigned | 271_0 | Clustered           | 12  | VC_271_0 | 12  | 0.4255 | 1          | 0.4255 | 0 | 0 | 0 | 1 Ref      |
| DQ394810 | Unassigned | Unassigned | Unassigned | 271_0 | Clustered           | 12  | VC_271_0 | 12  | 0.4255 | 1          | 0.4255 | 0 | 0 | 0 | 1 Ref      |
| DQ398041 | Unassigned | Unassigned | Unassigned | 571_7 | Clustered           | 28  | VC_571_7 | 28  | 0.1651 | 1          | 0.1651 | 0 | 0 | 0 | 0.8519 Ref |



|          |            |            |            |        |                     |              |     |        |            |        |   |   |   |            |
|----------|------------|------------|------------|--------|---------------------|--------------|-----|--------|------------|--------|---|---|---|------------|
| DQ398042 | Unassigned | Unassigned | Unassigned | 783_0  | Clustered           | 67 VC_783_0  | 67  | 0.8945 | 1          | 0.8945 | 0 | 0 | 0 | 1 Ref      |
| DQ398043 | Unassigned | Unassigned | Unassigned | 222_0  | Clustered           | 5 VC_222_0   | 5   | 0.072  | 0.99999997 | 0.072  | 0 | 0 | 0 | 1 Ref      |
| DQ398044 | Unassigned | Unassigned | Unassigned | 385_0  | Clustered           | 24 VC_385_0  | 24  | 0.5516 | 1          | 0.5516 | 0 | 0 | 0 | 1 Ref      |
| DQ398045 | Unassigned | Unassigned | Unassigned | 538_60 | Clustered           | 2 VC_538_60  | 2   | 0.0091 | 0.95761233 | 0.0087 | 0 | 0 | 0 | 1 Ref      |
| DQ398046 | Unassigned | Unassigned | Unassigned | 384_16 | Clustered           | 42 VC_384_16 | 42  | 0.134  | 1          | 0.134  | 0 | 0 | 0 | 0.7282 Ref |
| DQ398047 | Unassigned | Unassigned | Unassigned | 585_0  | Clustered           | 20 VC_585_0  | 20  | 0.8376 | 1          | 0.8376 | 0 | 0 | 0 | 1 Ref      |
| DQ398048 | Unassigned | Unassigned | Unassigned | 526_0  | Clustered           | 32 VC_526_0  | 32  | 0.9037 | 1          | 0.9037 | 0 | 0 | 0 | 1 Ref      |
| DQ398049 | Unassigned | Unassigned | Unassigned | 527_0  | Clustered           | 37 VC_527_0  | 37  | 0.9679 | 1          | 0.9679 | 0 | 0 | 0 | 1 Ref      |
| DQ398050 | Unassigned | Unassigned | Unassigned | 538_58 | Clustered           | 3 VC_538_58  | 3   | 0.0208 | 0.9985993  | 0.0208 | 0 | 0 | 0 | 1 Ref      |
| DQ398051 | Unassigned | Unassigned | Unassigned | 585_0  | Clustered           | 20 VC_585_0  | 20  | 0.8376 | 1          | 0.8376 | 0 | 0 | 0 | 1 Ref      |
| DQ398052 | Unassigned | Unassigned | Unassigned | 786_0  | Clustered           | 4 VC_786_0   | 4   | 0.3519 | 0.99997469 | 0.3519 | 0 | 0 | 0 | 1 Ref      |
| DQ398053 | Unassigned | Unassigned | Unassigned | 579_31 | Clustered/Singleton | 1 VC_579_31  | 1   | 0      | 1          | 0      | 0 | 0 | 0 | 1 Ref      |
| DQ426904 | Unassigned | Unassigned | Unassigned | 4_0    | Clustered           | 7 VC_4_0     | 7   | 0.7823 | 1          | 0.7823 | 0 | 0 | 0 | 1 Ref      |
| DQ426905 | Unassigned | Unassigned | Unassigned | 4_0    | Clustered           | 7 VC_4_0     | 7   | 0.7823 | 1          | 0.7823 | 0 | 0 | 0 | 1 Ref      |
| DQ431235 | Unassigned | Unassigned | Unassigned | 787_0  | Clustered           | 132 VC_787_0 | 132 | 1      | 1          | 1      | 0 | 0 | 0 | 1 Ref      |
| DQ466086 | Unassigned | Unassigned | Unassigned | 140_1  | Clustered           | 4 VC_140_1   | 4   | 0.1766 | 0.99998565 | 0.1766 | 0 | 0 | 0 | 1 Ref      |
| DQ490056 | Unassigned | Unassigned | Unassigned | 705_0  | Clustered           | 2 VC_705_0   | 2   | 0.4153 | 0.95606213 | 0.3971 | 0 | 0 | 0 | 1 Ref      |
| DQ500118 | Unassigned | Unassigned | Unassigned | 792_0  | Clustered           | 5 VC_792_0   | 5   | 0.8313 | 0.99999405 | 0.8313 | 0 | 0 | 0 | 1 Ref      |
| DQ517338 | Unassigned | Unassigned | Unassigned | 9_0    | Clustered           | 38 VC_9_0    | 38  | 0.4859 | 1          | 0.4859 | 0 | 0 | 0 | 1 Ref      |
| DQ529280 | Unassigned | Unassigned | Unassigned | 619_2  | Clustered           | 10 VC_619_2  | 10  | 0.3034 | 1          | 0.3034 | 0 | 0 | 0 | 1 Ref      |
| DQ530359 | Unassigned | Unassigned | Unassigned | 9_0    | Clustered           | 38 VC_9_0    | 38  | 0.4859 | 1          | 0.4859 | 0 | 0 | 0 | 1 Ref      |
| DQ530360 | Unassigned | Unassigned | Unassigned | 9_0    | Clustered           | 38 VC_9_0    | 38  | 0.4859 | 1          | 0.4859 | 0 | 0 | 0 | 1 Ref      |
| DQ530361 | Unassigned | Unassigned | Unassigned | 10_0   | Clustered           | 25 VC_10_0   | 25  | 0.3437 | 1          | 0.3437 | 0 | 0 | 0 | 0.9733 Ref |
| DQ530362 | Unassigned | Unassigned | Unassigned | 12_0   | Clustered           | 21 VC_12_0   | 21  | 0.2262 | 1          | 0.2262 | 0 | 0 | 0 | 0.9571 Ref |
| DQ631426 | Unassigned | Unassigned | Unassigned | 185_0  | Clustered           | 53 VC_185_0  | 53  | 0.9153 | 1          | 0.9153 | 0 | 0 | 0 | 1 Ref      |
| DQ674738 | Unassigned | Unassigned | Unassigned | 5_0    | Clustered           | 27 VC_5_0    | 27  | 0.9599 | 1          | 0.9599 | 0 | 0 | 0 | 1 Ref      |
| DQ777876 | Unassigned | Unassigned | Unassigned | 115_0  | Clustered           | 9 VC_115_0   | 9   | 0.5166 | 1          | 0.5166 | 0 | 0 | 0 | 1 Ref      |
| DQ785801 | Unassigned | Unassigned | Unassigned | 64_0   | Clustered           | 2 VC_64_0    | 2   | 0.1127 | 0.95690971 | 0.1079 | 0 | 0 | 0 | 1 Ref      |
| DQ832317 | Unassigned | Unassigned | Unassigned | 794_15 | Clustered           | 5 VC_794_15  | 5   | 0.0243 | 0.76144861 | 0.0185 | 0 | 0 | 0 | 0.9 Ref    |
| DQ836063 | Unassigned | Unassigned | Unassigned | 321_0  | Clustered           | 2 VC_321_0   | 2   | 0.1773 | 0.99999983 | 0.1773 | 0 | 0 | 0 | 1 Ref      |
| DQ864624 | Unassigned | Unassigned | Unassigned | 795_0  | Clustered           | 23 VC_795_0  | 23  | 0.5497 | 1          | 0.5497 | 0 | 0 | 0 | 1 Ref      |
| DQ873690 | Unassigned | Unassigned | Unassigned | 185_0  | Clustered           | 53 VC_185_0  | 53  | 0.9153 | 1          | 0.9153 | 0 | 0 | 0 | 1 Ref      |
| DQ875742 | Unassigned | Unassigned | Unassigned | 800_0  | Clustered           | 4 VC_800_0   | 4   | 0.8098 | 0.99985435 | 0.8096 | 0 | 0 | 0 | 1 Ref      |
| DQ904452 | Unassigned | Unassigned | Unassigned | 290_94 | Clustered           | 2 VC_290_94  | 2   | 0.0026 | 0.95293762 | 0.0025 | 0 | 0 | 0 | 1 Ref      |
| DQ908929 | Unassigned | Unassigned | Unassigned | 12_2   | Clustered           | 19 VC_12_2   | 19  | 0.2009 | 1          | 0.2009 | 0 | 0 | 0 | 1 Ref      |
| DQ997624 | Unassigned | Unassigned | Unassigned | 493_0  | Clustered           | 4 VC_493_0   | 4   | 0.9871 | 0.99748973 | 0.9847 | 0 | 0 | 0 | 1 Ref      |
| EF056009 | Unassigned | Unassigned | Unassigned | 801_0  | Clustered           | 37 VC_801_0  | 37  | 0.5672 | 1          | 0.5672 | 0 | 0 | 0 | 1 Ref      |
| EF057797 | Unassigned | Unassigned | Unassigned | 128_0  | Clustered           | 2 VC_128_0   | 2   | 0.1645 | 0.95181568 | 0.1566 | 0 | 0 | 0 | 1 Ref      |
| EF068134 | Unassigned | Unassigned | Unassigned | 196_0  | Clustered           | 13 VC_196_0  | 13  | 0.9973 | 0.99823802 | 0.9955 | 0 | 0 | 0 | 1 Ref      |
| EF108464 | Unassigned | Unassigned | Unassigned | 322_0  | Clustered           | 12 VC_322_0  | 12  | 0.8924 | 1          | 0.8924 | 0 | 0 | 0 | 1 Ref      |
| EF108465 | Unassigned | Unassigned | Unassigned | 322_0  | Clustered           | 12 VC_322_0  | 12  | 0.8924 | 1          | 0.8924 | 0 | 0 | 0 | 1 Ref      |
| EF153632 | Unassigned | Unassigned | Unassigned | 553_0  | Clustered           | 3 VC_553_0   | 3   | 0.0872 | 0.99853671 | 0.0871 | 0 | 0 | 0 | 1 Ref      |
| EF160123 | Unassigned | Unassigned | Unassigned | 467_0  | Clustered           | 6 VC_467_0   | 6   | 0.1136 | 1          | 0.1136 | 0 | 0 | 0 | 1 Ref      |
| EF177456 | Unassigned | Unassigned | Unassigned | 654_0  | Clustered           | 115 VC_654_0 | 115 | 0.7303 | 1          | 0.7303 | 0 | 0 | 0 | 0.8764 Ref |
| EF204939 | Unassigned | Unassigned | Unassigned | 322_0  | Clustered           | 12 VC_322_0  | 12  | 0.8924 | 1          | 0.8924 | 0 | 0 | 0 | 1 Ref      |
| EF204940 | Unassigned | Unassigned | Unassigned | 322_0  | Clustered           | 12 VC_322_0  | 12  | 0.8924 | 1          | 0.8924 | 0 | 0 | 0 | 1 Ref      |
| EF372997 | Unassigned | Unassigned | Unassigned | 352_0  | Clustered           | 31 VC_352_0  | 31  | 0.9547 | 1          | 0.9547 | 0 | 0 | 0 | 1 Ref      |
| EF380009 | Unassigned | Unassigned | Unassigned | 310_0  | Clustered           | 155 VC_310_0 | 155 | 0.9979 | 1          | 0.9979 | 0 | 0 | 0 | 1 Ref      |
| EF380010 | Unassigned | Unassigned | Unassigned | 310_0  | Clustered           | 155 VC_310_0 | 155 | 0.9979 | 1          | 0.9979 | 0 | 0 | 0 | 1 Ref      |
| EF380011 | Unassigned | Unassigned | Unassigned | 310_0  | Clustered           | 155 VC_310_0 | 155 | 0.9979 | 1          | 0.9979 | 0 | 0 | 0 | 1 Ref      |
| EF380012 | Unassigned | Unassigned | Unassigned | 310_0  | Clustered           | 155 VC_310_0 | 155 | 0.9979 | 1          | 0.9979 | 0 | 0 | 0 | 1 Ref      |
| EF380013 | Unassigned | Unassigned | Unassigned | 310_0  | Clustered           | 155 VC_310_0 | 155 | 0.9979 | 1          | 0.9979 | 0 | 0 | 0 | 1 Ref      |
| EF380014 | Unassigned | Unassigned | Unassigned | 310_0  | Clustered           | 155 VC_310_0 | 155 | 0.9979 | 1          | 0.9979 | 0 | 0 | 0 | 1 Ref      |
| EF380015 | Unassigned | Unassigned | Unassigned | 310_0  | Clustered           | 155 VC_310_0 | 155 | 0.9979 | 1          | 0.9979 | 0 | 0 | 0 | 1 Ref      |
| EF380016 | Unassigned | Unassigned | Unassigned | 310_0  | Clustered           | 155 VC_310_0 | 155 | 0.9979 | 1          | 0.9979 | 0 | 0 | 0 | 1 Ref      |
| EF380017 | Unassigned | Unassigned | Unassigned | 310_0  | Clustered           | 155 VC_310_0 | 155 | 0.9979 | 1          | 0.9979 | 0 | 0 | 0 | 1 Ref      |
| EF380018 | Unassigned | Unassigned | Unassigned | 310_0  | Clustered           | 155 VC_310_0 | 155 | 0.9979 | 1          | 0.9979 | 0 | 0 | 0 | 1 Ref      |
| EF380019 | Unassigned | Unassigned | Unassigned | 310_0  | Clustered           | 155 VC_310_0 | 155 | 0.9979 | 1          | 0.9979 | 0 | 0 | 0 | 1 Ref      |
| EF380020 | Unassigned | Unassigned | Unassigned | 310_0  | Clustered           | 155 VC_310_0 | 155 | 0.9979 | 1          | 0.9979 | 0 | 0 | 0 | 1 Ref      |
| EF380021 | Unassigned | Unassigned | Unassigned | 310_0  | Clustered           | 155 VC_310_0 | 155 | 0.9979 | 1          | 0.9979 | 0 | 0 | 0 | 1 Ref      |
| EF380022 | Unassigned | Unassigned | Unassigned | 310_0  | Clustered           | 155 VC_310_0 | 155 | 0.9979 | 1          | 0.9979 | 0 | 0 | 0 | 1 Ref      |
| EF380023 | Unassigned | Unassigned | Unassigned | 310_0  | Clustered           | 155 VC_310_0 | 155 | 0.9979 | 1          | 0.9979 | 0 | 0 | 0 | 1 Ref      |
| EF380024 | Unassigned | Unassigned | Unassigned | 310_0  | Clustered           | 155 VC_310_0 | 155 | 0.9979 | 1          | 0.9979 | 0 | 0 | 0 | 1 Ref      |
| EF380025 | Unassigned | Unassigned | Unassigned | 310_0  | Clustered           | 155 VC_310_0 | 155 | 0.9979 | 1          | 0.9979 | 0 | 0 | 0 | 1 Ref      |
| EF380026 | Unassigned | Unassigned | Unassigned | 310_0  | Clustered           | 155 VC_310_0 | 155 | 0.9979 | 1          | 0.9979 | 0 | 0 | 0 | 1 Ref      |
| EF380027 | Unassigned | Unassigned | Unassigned | 310_0  | Clustered           | 155 VC_310_0 | 155 | 0.9979 | 1          | 0.9979 | 0 | 0 | 0 | 1 Ref      |
| EF380028 | Unassigned | Unassigned | Unassigned | 310_0  | Clustered           | 155 VC_310_0 | 155 | 0.9979 | 1          | 0.9979 | 0 | 0 | 0 | 1 Ref      |
| EF380029 | Unassigned | Unassigned | Unassigned | 310_0  | Clustered           | 155 VC_310_0 | 155 | 0.9979 | 1          | 0.9979 | 0 | 0 | 0 | 1 Ref      |
| EF380030 | Unassigned | Unassigned | Unassigned | 310_0  | Clustered           | 155 VC_310_0 | 155 | 0.9979 | 1          | 0.9979 | 0 | 0 | 0 | 1 Ref      |
| EF380031 | Unassigned | Unassigned | Unassigned | 310_0  | Clustered           | 155 VC_310_0 | 155 | 0.9979 | 1          | 0.9979 | 0 | 0 | 0 | 1 Ref      |
| EF380032 | Unassigned | Unassigned | Unassigned | 310_0  | Clustered           | 155 VC_310_0 | 155 | 0.9979 | 1          | 0.9979 | 0 | 0 | 0 | 1 Ref      |
| EF432053 | Unassigned | Unassigned | Unassigned | 815_0  | Clustered           | 3 VC_815_0   | 3   | 1      | 1          | 1      | 0 | 0 | 0 | 1 Ref      |
| EF437941 | Unassigned | Unassigned | Unassigned | 609_0  | Clustered           | 27 VC_609_0  | 27  | 0.9943 | 1          | 0.9943 | 0 | 0 | 0 | 1 Ref      |
| EF456602 | Unassigned | Unassigned | Unassigned | 625_0  | Clustered           | 2 VC_625_0   | 2   | 0.2121 | 0.95222028 | 0.202  | 0 | 0 | 0 | 1 Ref      |
| EF460875 | Unassigned | Unassigned | Unassigned | 816_0  | Clustered           | 35 VC_816_0  | 35  | 0.9824 | 1          | 0.9824 | 0 | 0 | 0 | 1 Ref      |
| EF462197 | Unassigned | Unassigned | Unassigned | 7_0    | Clustered           | 28 VC_7_0    | 28  | 0.389  | 1          | 0.389  | 0 | 0 | 0 | 0.9947 Ref |
| EF462198 | Unassigned | Unassigned | Unassigned | 8_0    | Clustered           | 58 VC_8_0    | 58  | 0.8285 | 1          | 0.8285 | 0 | 0 | 0 | 0.9946 Ref |
| EF462199 | Unassigned | Unassigned | Unassigned | 7_0    | Clustered           | 28 VC_7_0    | 28  | 0.389  | 1          | 0.389  | 0 | 0 | 0 | 0.9947 Ref |
| EF469154 | Unassigned | Unassigned | Unassigned | 297_6  | Clustered           | 12 VC_297_6  | 12  | 0.1139 | 1          | 0.1139 | 0 | 0 | 0 | 0.8182 Ref |
| EF506570 | Unassigned | Unassigned | Unassigned | 818_0  | Clustered           | 3 VC_818_0   | 3   | 1      | 1          | 1      | 0 | 0 | 0 | 1 Ref      |
| EF529515 | Unassigned | Unassigned | Unassigned | 260_0  | Clustered           | 46 VC_260_0  | 46  | 0.5137 | 1          | 0.5137 | 0 | 0 | 0 | 1 Ref      |



|          |            |            |            |        |                     |              |     |        |            |        |   |   |   |            |
|----------|------------|------------|------------|--------|---------------------|--------------|-----|--------|------------|--------|---|---|---|------------|
| EF536069 | Unassigned | Unassigned | Unassigned | 538_24 | Clustered/Singleton | 1 VC_538_24  | 1   | 0      | 1          | 0      | 0 | 0 | 0 | 1 Ref      |
| EF537008 | Unassigned | Unassigned | Unassigned | 799_0  | Clustered           | 3 VC_799_0   | 3   | 0.4746 | 0.9961812  | 0.4727 | 0 | 0 | 0 | 1 Ref      |
| EF579802 | Unassigned | Unassigned | Unassigned | 642_0  | Clustered           | 3 VC_642_0   | 3   | 0.1258 | 0.72377751 | 0.0911 | 0 | 0 | 0 | 1 Ref      |
| EF583821 | Unassigned | Unassigned | Unassigned | 92_2   | Clustered/Singleton | 1 VC_92_2    | 1   | 0      | 1          | 0      | 0 | 0 | 0 | 1 Ref      |
| EU030938 | Unassigned | Unassigned | Unassigned | 618_0  | Clustered           | 50 VC_618_0  | 50  | 0.9989 | 1          | 0.9989 | 0 | 0 | 0 | 1 Ref      |
| EU030939 | Unassigned | Unassigned | Unassigned | 618_0  | Clustered           | 50 VC_618_0  | 50  | 0.9989 | 1          | 0.9989 | 0 | 0 | 0 | 1 Ref      |
| EU056923 | Unassigned | Unassigned | Unassigned | 434_0  | Clustered           | 45 VC_434_0  | 45  | 0.9479 | 1          | 0.9479 | 0 | 0 | 0 | 1 Ref      |
| EU078592 | Unassigned | Unassigned | Unassigned | 45_0   | Clustered           | 38 VC_45_0   | 38  | 0.5785 | 1          | 0.5785 | 0 | 0 | 0 | 0.9659 Ref |
| EU081845 | Unassigned | Unassigned | Unassigned | 824_0  | Clustered           | 3 VC_824_0   | 3   | 0.5034 | 0.9984288  | 0.5026 | 0 | 0 | 0 | 1 Ref      |
| EU100883 | Unassigned | Unassigned | Unassigned | 829_0  | Clustered           | 4 VC_829_0   | 4   | 0.9064 | 0.99761409 | 0.9042 | 0 | 0 | 0 | 1 Ref      |
| EU100884 | Unassigned | Unassigned | Unassigned | 829_0  | Clustered           | 4 VC_829_0   | 4   | 0.9064 | 0.99761409 | 0.9042 | 0 | 0 | 0 | 1 Ref      |
| EU124666 | Unassigned | Unassigned | Unassigned | 831_0  | Clustered           | 17 VC_831_0  | 17  | 0.9057 | 1          | 0.9057 | 0 | 0 | 0 | 1 Ref      |
| EU136189 | Unassigned | Unassigned | Unassigned | 98_0   | Clustered           | 30 VC_98_0   | 30  | 0.7175 | 1          | 0.7175 | 0 | 0 | 0 | 1 Ref      |
| EU197055 | Unassigned | Unassigned | Unassigned | 356_4  | Clustered/Singleton | 1 VC_356_4   | 1   | 0      | 1          | 0      | 0 | 0 | 0 | 1 Ref      |
| EU203571 | Unassigned | Unassigned | Unassigned | 834_0  | Clustered           | 18 VC_834_0  | 18  | 0.9116 | 1          | 0.9116 | 0 | 0 | 0 | 1 Ref      |
| EU221285 | Unassigned | Unassigned | Unassigned | 210_0  | Clustered           | 105 VC_210_0 | 105 | 0.4076 | 1          | 0.4076 | 0 | 0 | 0 | 0.7766 Ref |
| EU236438 | Unassigned | Unassigned | Unassigned | 434_0  | Clustered           | 45 VC_434_0  | 45  | 0.9479 | 1          | 0.9479 | 0 | 0 | 0 | 1 Ref      |
| EU246945 | Unassigned | Unassigned | Unassigned | 279_0  | Clustered           | 11 VC_279_0  | 11  | 0.4839 | 1          | 0.4839 | 0 | 0 | 0 | 0.8727 Ref |
| EU272036 | Unassigned | Unassigned | Unassigned | 185_0  | Clustered           | 53 VC_185_0  | 53  | 0.9153 | 1          | 0.9153 | 0 | 0 | 0 | 1 Ref      |
| EU272037 | Unassigned | Unassigned | Unassigned | 185_0  | Clustered           | 53 VC_185_0  | 53  | 0.9153 | 1          | 0.9153 | 0 | 0 | 0 | 1 Ref      |
| EU311208 | Unassigned | Unassigned | Unassigned | 35_0   | Clustered           | 35 VC_35_0   | 35  | 0.431  | 1          | 0.431  | 0 | 0 | 0 | 1 Ref      |
| EU330206 | Unassigned | Unassigned | Unassigned | 837_1  | Clustered           | 24 VC_837_1  | 24  | 0.5328 | 1          | 0.5328 | 0 | 0 | 0 | 1 Ref      |
| EU340421 | Unassigned | Unassigned | Unassigned | 657_0  | Clustered           | 7 VC_657_0   | 7   | 0.8495 | 1          | 0.8495 | 0 | 0 | 0 | 1 Ref      |
| EU350361 | Unassigned | Unassigned | Unassigned | 838_0  | Clustered           | 3 VC_838_0   | 3   | 1      | 1          | 1      | 0 | 0 | 0 | 1 Ref      |
| EU399241 | Unassigned | Unassigned | Unassigned | 128_0  | Clustered           | 2 VC_128_0   | 2   | 0.1645 | 0.95181568 | 0.1566 | 0 | 0 | 0 | 1 Ref      |
| EU408779 | Unassigned | Unassigned | Unassigned | 435_0  | Clustered           | 7 VC_435_0   | 7   | 0.9041 | 0.9998143  | 0.9039 | 0 | 0 | 0 | 1 Ref      |
| EU409559 | Unassigned | Unassigned | Unassigned | 390_0  | Clustered           | 2 VC_390_0   | 2   | 0.4516 | 0.94520071 | 0.4269 | 0 | 0 | 0 | 1 Ref      |
| EU418428 | Unassigned | Unassigned | Unassigned | 155_8  | Clustered           | 66 VC_155_8  | 66  | 0.4537 | 1          | 0.4537 | 0 | 0 | 0 | 0.8182 Ref |
| EU545650 | Unassigned | Unassigned | Unassigned | 361_0  | Clustered           | 7 VC_361_0   | 7   | 0.9353 | 0.99999998 | 0.9353 | 0 | 0 | 0 | 1 Ref      |
| EU547803 | Unassigned | Unassigned | Unassigned | 398_0  | Clustered           | 51 VC_398_0  | 51  | 0.8741 | 1          | 0.8741 | 0 | 0 | 0 | 1 Ref      |
| EU568876 | Unassigned | Unassigned | Unassigned | 783_0  | Clustered           | 67 VC_783_0  | 67  | 0.8945 | 1          | 0.8945 | 0 | 0 | 0 | 1 Ref      |
| EU570103 | Unassigned | Unassigned | Unassigned | 30_1   | Clustered           | 53 VC_30_1   | 53  | 0.7151 | 1          | 0.7151 | 0 | 0 | 0 | 0.9325 Ref |
| EU588980 | Unassigned | Unassigned | Unassigned | 839_0  | Clustered           | 8 VC_839_0   | 8   | 0.9889 | 1          | 0.9889 | 0 | 0 | 0 | 1 Ref      |
| EU622808 | Unassigned | Unassigned | Unassigned | 842_0  | Clustered           | 14 VC_842_0  | 14  | 0.6581 | 1          | 0.6581 | 0 | 0 | 0 | 1 Ref      |
| EU652770 | Unassigned | Unassigned | Unassigned | 403_0  | Clustered           | 4 VC_403_0   | 4   | 0.0462 | 0.99998824 | 0.0462 | 0 | 0 | 0 | 1 Ref      |
| EU676000 | Unassigned | Unassigned | Unassigned | 585_0  | Clustered           | 20 VC_585_0  | 20  | 0.8376 | 1          | 0.8376 | 0 | 0 | 0 | 1 Ref      |
| EU710883 | Unassigned | Unassigned | Unassigned | 339_0  | Clustered           | 11 VC_339_0  | 11  | 0.4647 | 1          | 0.4647 | 0 | 0 | 0 | 1 Ref      |
| EU716414 | Unassigned | Unassigned | Unassigned | 81_0   | Clustered           | 41 VC_81_0   | 41  | 0.5815 | 1          | 0.5815 | 0 | 0 | 0 | 0.9805 Ref |
| EU717894 | Unassigned | Unassigned | Unassigned | 115_0  | Clustered           | 9 VC_115_0   | 9   | 0.5166 | 1          | 0.5166 | 0 | 0 | 0 | 1 Ref      |
| EU734170 | Unassigned | Unassigned | Unassigned | 399_0  | Clustered           | 49 VC_399_0  | 49  | 0.7927 | 1          | 0.7927 | 0 | 0 | 0 | 1 Ref      |
| EU734171 | Unassigned | Unassigned | Unassigned | 399_0  | Clustered           | 49 VC_399_0  | 49  | 0.7927 | 1          | 0.7927 | 0 | 0 | 0 | 1 Ref      |
| EU734172 | Unassigned | Unassigned | Unassigned | 465_0  | Clustered           | 80 VC_465_0  | 80  | 0.9988 | 1          | 0.9988 | 0 | 0 | 0 | 1 Ref      |
| EU734173 | Unassigned | Unassigned | Unassigned | 848_0  | Clustered           | 124 VC_848_0 | 124 | 0.9484 | 1          | 0.9484 | 0 | 0 | 0 | 1 Ref      |
| EU734174 | Unassigned | Unassigned | Unassigned | 405_0  | Clustered           | 126 VC_405_0 | 126 | 0.9614 | 1          | 0.9614 | 0 | 0 | 0 | 1 Ref      |
| EU744248 | Unassigned | Unassigned | Unassigned | 335_21 | Clustered           | 5 VC_335_21  | 5   | 0.0208 | 0.99999976 | 0.0208 | 0 | 0 | 0 | 0.8 Ref    |
| EU744249 | Unassigned | Unassigned | Unassigned | 335_13 | Clustered           | 2 VC_335_13  | 2   | 0.0082 | 0.95751436 | 0.0079 | 0 | 0 | 0 | 1 Ref      |
| EU744250 | Unassigned | Unassigned | Unassigned | 224_0  | Clustered           | 5 VC_224_0   | 5   | 0.0685 | 0.99999998 | 0.0685 | 0 | 0 | 0 | 1 Ref      |
| EU744251 | Unassigned | Unassigned | Unassigned | 335_44 | Clustered           | 3 VC_335_44  | 3   | 0.0157 | 0.99859171 | 0.0157 | 0 | 0 | 0 | 1 Ref      |
| EU744252 | Unassigned | Unassigned | Unassigned | 335_13 | Clustered           | 2 VC_335_13  | 2   | 0.0082 | 0.95751436 | 0.0079 | 0 | 0 | 0 | 1 Ref      |
| EU770221 | Unassigned | Unassigned | Unassigned | 385_0  | Clustered           | 24 VC_385_0  | 24  | 0.5516 | 1          | 0.5516 | 0 | 0 | 0 | 1 Ref      |
| EU770222 | Unassigned | Unassigned | Unassigned | 587_0  | Clustered           | 8 VC_587_0   | 8   | 0.4907 | 1          | 0.4907 | 0 | 0 | 0 | 1 Ref      |
| EU771092 | Unassigned | Unassigned | Unassigned | 842_0  | Clustered           | 14 VC_842_0  | 14  | 0.6581 | 1          | 0.6581 | 0 | 0 | 0 | 1 Ref      |
| EU794049 | Unassigned | Unassigned | Unassigned | 31_0   | Clustered           | 10 VC_31_0   | 10  | 0.5129 | 1          | 0.5129 | 0 | 0 | 0 | 1 Ref      |
| EU816588 | Unassigned | Unassigned | Unassigned | 571_6  | Clustered           | 22 VC_571_6  | 22  | 0.1207 | 1          | 0.1207 | 0 | 0 | 0 | 0.8095 Ref |
| EU816589 | Unassigned | Unassigned | Unassigned | 527_0  | Clustered           | 37 VC_527_0  | 37  | 0.9679 | 1          | 0.9679 | 0 | 0 | 0 | 1 Ref      |
| EU816590 | Unassigned | Unassigned | Unassigned | 538_58 | Clustered           | 3 VC_538_58  | 3   | 0.0208 | 0.9985993  | 0.0208 | 0 | 0 | 0 | 1 Ref      |
| EU816591 | Unassigned | Unassigned | Unassigned | 571_2  | Clustered           | 17 VC_571_2  | 17  | 0.0965 | 1          | 0.0965 | 0 | 0 | 0 | 0.9779 Ref |
| EU826466 | Unassigned | Unassigned | Unassigned | 580_0  | Clustered           | 2 VC_580_0   | 2   | 0.011  | 0.95651281 | 0.0105 | 0 | 0 | 0 | 1 Ref      |
| EU826467 | Unassigned | Unassigned | Unassigned | 579_30 | Clustered           | 3 VC_579_30  | 3   | 0.0064 | 0.74796372 | 0.0048 | 0 | 0 | 0 | 1 Ref      |
| EU826468 | Unassigned | Unassigned | Unassigned | 579_25 | Clustered/Singleton | 1 VC_579_25  | 1   | 0      | 1          | 0      | 0 | 0 | 0 | 1 Ref      |
| EU826469 | Unassigned | Unassigned | Unassigned | 579_26 | Clustered/Singleton | 1 VC_579_26  | 1   | 0      | 1          | 0      | 0 | 0 | 0 | 1 Ref      |
| EU826470 | Unassigned | Unassigned | Unassigned | 335_49 | Clustered           | 17 VC_335_49 | 17  | 0.0731 | 1          | 0.0731 | 0 | 0 | 0 | 0.7721 Ref |
| EU826471 | Unassigned | Unassigned | Unassigned | 579_2  | Clustered           | 2 VC_579_2   | 2   | 0.0032 | 0.63743142 | 0.002  | 0 | 0 | 0 | 1 Ref      |
| EU855793 | Unassigned | Unassigned | Unassigned | 755_0  | Clustered           | 2 VC_755_0   | 2   | 0.2367 | 0.9499739  | 0.2249 | 0 | 0 | 0 | 1 Ref      |
| EU861004 | Unassigned | Unassigned | Unassigned | 9_0    | Clustered           | 38 VC_9_0    | 38  | 0.4859 | 1          | 0.4859 | 0 | 0 | 0 | 1 Ref      |
| EU861005 | Unassigned | Unassigned | Unassigned | 8_0    | Clustered           | 58 VC_8_0    | 58  | 0.8285 | 1          | 0.8285 | 0 | 0 | 0 | 0.9946 Ref |
| EU863408 | Unassigned | Unassigned | Unassigned | 609_0  | Clustered           | 27 VC_609_0  | 27  | 0.9943 | 1          | 0.9943 | 0 | 0 | 0 | 1 Ref      |
| EU863409 | Unassigned | Unassigned | Unassigned | 297_6  | Clustered           | 12 VC_297_6  | 12  | 0.1139 | 1          | 0.1139 | 0 | 0 | 0 | 0.8182 Ref |
| EU874396 | Unassigned | Unassigned | Unassigned | 671_0  | Clustered           | 4 VC_671_0   | 4   | 0.4756 | 0.99998076 | 0.4756 | 0 | 0 | 0 | 1 Ref      |
| EU877232 | Unassigned | Unassigned | Unassigned | 340_7  | Clustered           | 18 VC_340_7  | 18  | 0.0936 | 1          | 0.0936 | 0 | 0 | 0 | 0.7778 Ref |
| EU887664 | Unassigned | Unassigned | Unassigned | 853_0  | Clustered           | 5 VC_853_0   | 5   | 0.8735 | 0.9999832  | 0.8735 | 0 | 0 | 0 | 1 Ref      |
| FI000341 | Unassigned | Unassigned | Unassigned | 62_0   | Clustered           | 12 VC_62_0   | 12  | 0.7624 | 1          | 0.7624 | 0 | 0 | 0 | 1 Ref      |
| FI000813 | Unassigned | Unassigned | Unassigned | 30_1   | Clustered           | 53 VC_30_1   | 53  | 0.7151 | 1          | 0.7151 | 0 | 0 | 0 | 0.9325 Ref |
| FI008913 | Unassigned | Unassigned | Unassigned | 854_0  | Clustered           | 6 VC_854_0   | 6   | 0.514  | 1          | 0.514  | 0 | 0 | 0 | 1 Ref      |
| FI168659 | Unassigned | Unassigned | Unassigned | 536_0  | Clustered           | 6 VC_536_0   | 6   | 0.129  | 1          | 0.129  | 0 | 0 | 0 | 1 Ref      |
| FI168660 | Unassigned | Unassigned | Unassigned | 585_0  | Clustered           | 20 VC_585_0  | 20  | 0.8376 | 1          | 0.8376 | 0 | 0 | 0 | 1 Ref      |
| FI168661 | Unassigned | Unassigned | Unassigned | 585_0  | Clustered           | 20 VC_585_0  | 20  | 0.8376 | 1          | 0.8376 | 0 | 0 | 0 | 1 Ref      |
| FI168662 | Unassigned | Unassigned | Unassigned | 585_0  | Clustered           | 20 VC_585_0  | 20  | 0.8376 | 1          | 0.8376 | 0 | 0 | 0 | 1 Ref      |
| FI174690 | Unassigned | Unassigned | Unassigned | 538_31 | Clustered           | 11 VC_538_31 | 11  | 0.0894 | 1          | 0.0894 | 0 | 0 | 0 | 0.6 Ref    |
| FI174691 | Unassigned | Unassigned | Unassigned | 587_0  | Clustered           | 8 VC_587_0   | 8   | 0.4907 | 1          | 0.4907 | 0 | 0 | 0 | 1 Ref      |
| FI174693 | Unassigned | Unassigned | Unassigned | 538_71 | Clustered/Singleton | 1 VC_538_71  | 1   | 0      | 1          | 0      | 0 | 0 | 0 | 1 Ref      |



|          |            |            |            |        |                     |              |     |        |            |        |   |   |   |        |     |
|----------|------------|------------|------------|--------|---------------------|--------------|-----|--------|------------|--------|---|---|---|--------|-----|
| FI174694 | Unassigned | Unassigned | Unassigned | 384_16 | Clustered           | 42 VC_384_16 | 42  | 0.134  | 1          | 0.134  | 0 | 0 | 0 | 0.7282 | Ref |
| FI184280 | Unassigned | Unassigned | Unassigned | 43_1   | Clustered           | 10 VC_43_1   | 10  | 0.1173 | 1          | 0.1173 | 0 | 0 | 0 | 0.8222 | Ref |
| FI188381 | Unassigned | Unassigned | Unassigned | 43_1   | Clustered           | 10 VC_43_1   | 10  | 0.1173 | 1          | 0.1173 | 0 | 0 | 0 | 0.8222 | Ref |
| FI194439 | Unassigned | Unassigned | Unassigned | 399_0  | Clustered           | 49 VC_399_0  | 49  | 0.7927 | 1          | 0.7927 | 0 | 0 | 0 | 1      | Ref |
| FI226752 | Unassigned | Unassigned | Unassigned | 260_0  | Clustered           | 46 VC_260_0  | 46  | 0.5137 | 1          | 0.5137 | 0 | 0 | 0 | 1      | Ref |
| FI230960 | Unassigned | Unassigned | Unassigned | 89_0   | Clustered           | 8 VC_89_0    | 8   | 0.5507 | 1          | 0.5507 | 0 | 0 | 0 | 1      | Ref |
| FI236310 | Unassigned | Unassigned | Unassigned | 258_0  | Clustered           | 121 VC_258_0 | 121 | 0.7359 | 1          | 0.7359 | 0 | 0 | 0 | 0.9999 | Ref |
| FI373894 | Unassigned | Unassigned | Unassigned | 133_2  | Clustered           | 7 VC_133_2   | 7   | 0.0679 | 1          | 0.0679 | 0 | 0 | 0 | 0.9048 | Ref |
| FI409640 | Unassigned | Unassigned | Unassigned | 83_0   | Clustered           | 24 VC_83_0   | 24  | 0.7345 | 1          | 0.7345 | 0 | 0 | 0 | 1      | Ref |
| FI429185 | Unassigned | Unassigned | Unassigned | 552_0  | Clustered           | 9 VC_552_0   | 9   | 1      | 1          | 1      | 0 | 0 | 0 | 1      | Ref |
| FI483837 | Unassigned | Unassigned | Unassigned | 322_0  | Clustered           | 12 VC_322_0  | 12  | 0.8924 | 1          | 0.8924 | 0 | 0 | 0 | 1      | Ref |
| FI483838 | Unassigned | Unassigned | Unassigned | 322_0  | Clustered           | 12 VC_322_0  | 12  | 0.8924 | 1          | 0.8924 | 0 | 0 | 0 | 1      | Ref |
| FI483839 | Unassigned | Unassigned | Unassigned | 322_0  | Clustered           | 12 VC_322_0  | 12  | 0.8924 | 1          | 0.8924 | 0 | 0 | 0 | 1      | Ref |
| FI483840 | Unassigned | Unassigned | Unassigned | 196_0  | Clustered           | 13 VC_196_0  | 13  | 0.9973 | 0.99823802 | 0.9955 | 0 | 0 | 0 | 1      | Ref |
| FI483841 | Unassigned | Unassigned | Unassigned | 196_0  | Clustered           | 13 VC_196_0  | 13  | 0.9973 | 0.99823802 | 0.9955 | 0 | 0 | 0 | 1      | Ref |
| FI483842 | Unassigned | Unassigned | Unassigned | 196_0  | Clustered           | 13 VC_196_0  | 13  | 0.9973 | 0.99823802 | 0.9955 | 0 | 0 | 0 | 1      | Ref |
| FI483843 | Unassigned | Unassigned | Unassigned | 196_0  | Clustered           | 13 VC_196_0  | 13  | 0.9973 | 0.99823802 | 0.9955 | 0 | 0 | 0 | 1      | Ref |
| FI483844 | Unassigned | Unassigned | Unassigned | 196_0  | Clustered           | 13 VC_196_0  | 13  | 0.9973 | 0.99823802 | 0.9955 | 0 | 0 | 0 | 1      | Ref |
| FI539132 | Unassigned | Unassigned | Unassigned | 196_0  | Clustered           | 13 VC_196_0  | 13  | 0.9973 | 0.99823802 | 0.9955 | 0 | 0 | 0 | 1      | Ref |
| FI539133 | Unassigned | Unassigned | Unassigned | 196_0  | Clustered           | 13 VC_196_0  | 13  | 0.9973 | 0.99823802 | 0.9955 | 0 | 0 | 0 | 1      | Ref |
| FI539134 | Unassigned | Unassigned | Unassigned | 196_0  | Clustered           | 13 VC_196_0  | 13  | 0.9973 | 0.99823802 | 0.9955 | 0 | 0 | 0 | 1      | Ref |
| FI539135 | Unassigned | Unassigned | Unassigned | 196_0  | Clustered           | 13 VC_196_0  | 13  | 0.9973 | 0.99823802 | 0.9955 | 0 | 0 | 0 | 1      | Ref |
| FI591093 | Unassigned | Unassigned | Unassigned | 857_0  | Clustered           | 16 VC_857_0  | 16  | 0.9317 | 1          | 0.9317 | 0 | 0 | 0 | 1      | Ref |
| FI591094 | Unassigned | Unassigned | Unassigned | 857_0  | Clustered           | 16 VC_857_0  | 16  | 0.9317 | 1          | 0.9317 | 0 | 0 | 0 | 1      | Ref |
| FI641182 | Unassigned | Unassigned | Unassigned | 527_0  | Clustered           | 37 VC_527_0  | 37  | 0.9679 | 1          | 0.9679 | 0 | 0 | 0 | 1      | Ref |
| FI685651 | Unassigned | Unassigned | Unassigned | 858_0  | Clustered           | 7 VC_858_0   | 7   | 1      | 1          | 1      | 0 | 0 | 0 | 1      | Ref |
| FI706171 | Unassigned | Unassigned | Unassigned | 787_0  | Clustered           | 132 VC_787_0 | 132 | 1      | 1          | 1      | 0 | 0 | 0 | 1      | Ref |
| FI706172 | Unassigned | Unassigned | Unassigned | 787_0  | Clustered           | 132 VC_787_0 | 132 | 1      | 1          | 1      | 0 | 0 | 0 | 1      | Ref |
| FI713816 | Unassigned | Unassigned | Unassigned | 7_0    | Clustered           | 28 VC_7_0    | 28  | 0.389  | 1          | 0.389  | 0 | 0 | 0 | 0.9947 | Ref |
| FI750948 | Unassigned | Unassigned | Unassigned | 859_0  | Clustered           | 67 VC_859_0  | 67  | 0.9622 | 1          | 0.9622 | 0 | 0 | 0 | 1      | Ref |
| FI822135 | Unassigned | Unassigned | Unassigned | 95_0   | Clustered           | 2 VC_95_0    | 2   | 0.1028 | 0.95671136 | 0.0984 | 0 | 0 | 0 | 1      | Ref |
| FI839692 | Unassigned | Unassigned | Unassigned | 290_84 | Clustered/Singleton | 1 VC_290_84  | 1   | 0      | 1          | 0      | 0 | 0 | 0 | 1      | Ref |
| FI839693 | Unassigned | Unassigned | Unassigned | 290_3  | Clustered           | 3 VC_290_3   | 3   | 0.0055 | 0.99676466 | 0.0054 | 0 | 0 | 0 | 1      | Ref |
| FI848881 | Unassigned | Unassigned | Unassigned | 210_0  | Clustered           | 105 VC_210_0 | 105 | 0.4076 | 1          | 0.4076 | 0 | 0 | 0 | 0.7766 | Ref |
| FI848882 | Unassigned | Unassigned | Unassigned | 210_0  | Clustered           | 105 VC_210_0 | 105 | 0.4076 | 1          | 0.4076 | 0 | 0 | 0 | 0.7766 | Ref |
| FI848883 | Unassigned | Unassigned | Unassigned | 210_0  | Clustered           | 105 VC_210_0 | 105 | 0.4076 | 1          | 0.4076 | 0 | 0 | 0 | 0.7766 | Ref |
| FI848884 | Unassigned | Unassigned | Unassigned | 210_0  | Clustered           | 105 VC_210_0 | 105 | 0.4076 | 1          | 0.4076 | 0 | 0 | 0 | 0.7766 | Ref |
| FI848885 | Unassigned | Unassigned | Unassigned | 210_0  | Clustered           | 105 VC_210_0 | 105 | 0.4076 | 1          | 0.4076 | 0 | 0 | 0 | 0.7766 | Ref |
| FI849058 | Unassigned | Unassigned | Unassigned | 310_0  | Clustered           | 155 VC_310_0 | 155 | 0.9979 | 1          | 0.9979 | 0 | 0 | 0 | 1      | Ref |
| FI867910 | Unassigned | Unassigned | Unassigned | 311_0  | Clustered           | 11 VC_311_0  | 11  | 0.7851 | 1          | 0.7851 | 0 | 0 | 0 | 1      | Ref |
| FI867911 | Unassigned | Unassigned | Unassigned | 311_0  | Clustered           | 11 VC_311_0  | 11  | 0.7851 | 1          | 0.7851 | 0 | 0 | 0 | 1      | Ref |
| FI867912 | Unassigned | Unassigned | Unassigned | 311_0  | Clustered           | 11 VC_311_0  | 11  | 0.7851 | 1          | 0.7851 | 0 | 0 | 0 | 1      | Ref |
| FI867913 | Unassigned | Unassigned | Unassigned | 311_0  | Clustered           | 11 VC_311_0  | 11  | 0.7851 | 1          | 0.7851 | 0 | 0 | 0 | 1      | Ref |
| FI867914 | Unassigned | Unassigned | Unassigned | 311_0  | Clustered           | 11 VC_311_0  | 11  | 0.7851 | 1          | 0.7851 | 0 | 0 | 0 | 1      | Ref |
| FI870915 | Unassigned | Unassigned | Unassigned | 618_0  | Clustered           | 50 VC_618_0  | 50  | 0.9989 | 1          | 0.9989 | 0 | 0 | 0 | 1      | Ref |
| FI870916 | Unassigned | Unassigned | Unassigned | 618_0  | Clustered           | 50 VC_618_0  | 50  | 0.9989 | 1          | 0.9989 | 0 | 0 | 0 | 1      | Ref |
| FI870917 | Unassigned | Unassigned | Unassigned | 618_0  | Clustered           | 50 VC_618_0  | 50  | 0.9989 | 1          | 0.9989 | 0 | 0 | 0 | 1      | Ref |
| FI896200 | Unassigned | Unassigned | Unassigned | 861_0  | Clustered           | 29 VC_861_0  | 29  | 0.9954 | 1          | 0.9954 | 0 | 0 | 0 | 1      | Ref |
| FI904927 | Unassigned | Unassigned | Unassigned | 16_0   | Clustered           | 12 VC_16_0   | 12  | 0.6601 | 1          | 0.6601 | 0 | 0 | 0 | 1      | Ref |
| FI937737 | Unassigned | Unassigned | Unassigned | 168_0  | Clustered           | 18 VC_168_0  | 18  | 0.7394 | 1          | 0.7394 | 0 | 0 | 0 | 0.8627 | Ref |
| FI965538 | Unassigned | Unassigned | Unassigned | 261_0  | Clustered           | 13 VC_261_0  | 13  | 0.2024 | 1          | 0.2024 | 0 | 0 | 0 | 1      | Ref |
| FI973624 | Unassigned | Unassigned | Unassigned | 783_0  | Clustered           | 67 VC_783_0  | 67  | 0.8945 | 1          | 0.8945 | 0 | 0 | 0 | 1      | Ref |
| FM164764 | Unassigned | Unassigned | Unassigned | 360_0  | Clustered           | 22 VC_360_0  | 22  | 0.96   | 1          | 0.96   | 0 | 0 | 0 | 1      | Ref |
| FM180578 | Unassigned | Unassigned | Unassigned | 43_1   | Clustered           | 10 VC_43_1   | 10  | 0.1173 | 1          | 0.1173 | 0 | 0 | 0 | 0.8222 | Ref |
| FM201281 | Unassigned | Unassigned | Unassigned | 80_2   | Clustered/Singleton | 1 VC_80_2    | 1   | 0      | 1          | 0      | 0 | 0 | 0 | 1      | Ref |
| FM201282 | Unassigned | Unassigned | Unassigned | 80_0   | Clustered           | 64 VC_80_0   | 64  | 0.418  | 1          | 0.418  | 0 | 0 | 0 | 0.7649 | Ref |
| FM207411 | Unassigned | Unassigned | Unassigned | 447_8  | Clustered/Singleton | 1 VC_447_8   | 1   | 0      | 1          | 0      | 0 | 0 | 0 | 1      | Ref |
| FM864213 | Unassigned | Unassigned | Unassigned | 647_0  | Clustered           | 37 VC_647_0  | 37  | 0.5847 | 1          | 0.5847 | 0 | 0 | 0 | 0.9234 | Ref |
| FM887021 | Unassigned | Unassigned | Unassigned | 80_7   | Clustered           | 33 VC_80_7   | 33  | 0.2156 | 1          | 0.2156 | 0 | 0 | 0 | 0.8409 | Ref |
| FM897211 | Unassigned | Unassigned | Unassigned | 80_7   | Clustered           | 33 VC_80_7   | 33  | 0.2156 | 1          | 0.2156 | 0 | 0 | 0 | 0.8409 | Ref |
| FN263372 | Unassigned | Unassigned | Unassigned | 434_0  | Clustered           | 45 VC_434_0  | 45  | 0.9479 | 1          | 0.9479 | 0 | 0 | 0 | 1      | Ref |
| FN297812 | Unassigned | Unassigned | Unassigned | 24_0   | Clustered           | 3 VC_24_0    | 3   | 0.4232 | 0.9983762  | 0.4226 | 0 | 0 | 0 | 1      | Ref |
| FN391954 | Unassigned | Unassigned | Unassigned | 344_0  | Clustered           | 30 VC_344_0  | 30  | 0.523  | 1          | 0.523  | 0 | 0 | 0 | 0.9954 | Ref |
| FN422398 | Unassigned | Unassigned | Unassigned | 863_0  | Clustered           | 5 VC_863_0   | 5   | 0.1633 | 0.99999995 | 0.1633 | 0 | 0 | 0 | 1      | Ref |
| FN422399 | Unassigned | Unassigned | Unassigned | 862_0  | Clustered           | 29 VC_862_0  | 29  | 0.8594 | 1          | 0.8594 | 0 | 0 | 0 | 1      | Ref |
| FN594518 | Unassigned | Unassigned | Unassigned | 161_0  | Clustered           | 14 VC_161_0  | 14  | 0.6064 | 1          | 0.6064 | 0 | 0 | 0 | 1      | Ref |
| FN667788 | Unassigned | Unassigned | Unassigned | 867_0  | Clustered           | 5 VC_867_0   | 5   | 0.2806 | 0.99999994 | 0.2806 | 0 | 0 | 0 | 1      | Ref |
| FN667789 | Unassigned | Unassigned | Unassigned | 867_0  | Clustered           | 5 VC_867_0   | 5   | 0.2806 | 0.99999994 | 0.2806 | 0 | 0 | 0 | 1      | Ref |
| FN997652 | Unassigned | Unassigned | Unassigned | 647_0  | Clustered           | 37 VC_647_0  | 37  | 0.5847 | 1          | 0.5847 | 0 | 0 | 0 | 0.9234 | Ref |
| FO818745 | Unassigned | Unassigned | Unassigned | 254_0  | Clustered           | 14 VC_254_0  | 14  | 0.9118 | 1          | 0.9118 | 0 | 0 | 0 | 0.967  | Ref |
| QQ312032 | Unassigned | Unassigned | Unassigned | 135_22 | Clustered           | 13 VC_135_22 | 13  | 0.0795 | 1          | 0.0795 | 0 | 0 | 0 | 0.8205 | Ref |
| QQ482083 | Unassigned | Unassigned | Unassigned | 339_0  | Clustered           | 11 VC_339_0  | 11  | 0.4647 | 1          | 0.4647 | 0 | 0 | 0 | 1      | Ref |
| QQ482084 | Unassigned | Unassigned | Unassigned | 467_0  | Clustered           | 6 VC_467_0   | 6   | 0.1136 | 1          | 0.1136 | 0 | 0 | 0 | 1      | Ref |
| QQ482086 | Unassigned | Unassigned | Unassigned | 467_0  | Clustered           | 6 VC_467_0   | 6   | 0.1136 | 1          | 0.1136 | 0 | 0 | 0 | 1      | Ref |
| FR667955 | Unassigned | Unassigned | Unassigned | 405_0  | Clustered           | 126 VC_405_0 | 126 | 0.9614 | 1          | 0.9614 | 0 | 0 | 0 | 1      | Ref |
| FR671405 | Unassigned | Unassigned | Unassigned | 427_0  | Clustered           | 37 VC_427_0  | 37  | 0.5729 | 1          | 0.5729 | 0 | 0 | 0 | 0.9474 | Ref |
| FR671406 | Unassigned | Unassigned | Unassigned | 427_0  | Clustered           | 37 VC_427_0  | 37  | 0.5729 | 1          | 0.5729 | 0 | 0 | 0 | 0.9474 | Ref |
| FR671407 | Unassigned | Unassigned | Unassigned | 427_0  | Clustered           | 37 VC_427_0  | 37  | 0.5729 | 1          | 0.5729 | 0 | 0 | 0 | 0.9474 | Ref |
| FR671408 | Unassigned | Unassigned | Unassigned | 268_1  | Clustered           | 20 VC_268_1  | 20  | 0.1906 | 1          | 0.1906 | 0 | 0 | 0 | 0.6789 | Ref |
| FR671409 | Unassigned | Unassigned | Unassigned | 268_1  | Clustered           | 20 VC_268_1  | 20  | 0.1906 | 1          | 0.1906 | 0 | 0 | 0 | 0.6789 | Ref |
| FR671410 | Unassigned | Unassigned | Unassigned | 427_0  | Clustered           | 37 VC_427_0  | 37  | 0.5729 | 1          | 0.5729 | 0 | 0 | 0 | 0.9474 | Ref |



|          |            |            |            |        |                     |              |     |        |            |        |   |   |   |        |       |
|----------|------------|------------|------------|--------|---------------------|--------------|-----|--------|------------|--------|---|---|---|--------|-------|
| FR671411 | Unassigned | Unassigned | Unassigned | 427_0  | Clustered           | 37 VC_427_0  | 37  | 0.5729 | 1          | 0.5729 | 0 | 0 | 0 | 0.9474 | Ref   |
| FR682616 | Unassigned | Unassigned | Unassigned | 857_0  | Clustered           | 16 VC_857_0  | 16  | 0.9317 | 1          | 0.9317 | 0 | 0 | 0 |        | 1 Ref |
| FR687252 | Unassigned | Unassigned | Unassigned | 112_0  | Clustered           | 4 VC_112_0   | 4   | 0.1133 | 0.99998733 | 0.1133 | 0 | 0 | 0 |        | 1 Ref |
| FR719956 | Unassigned | Unassigned | Unassigned | 857_0  | Clustered           | 16 VC_857_0  | 16  | 0.9317 | 1          | 0.9317 | 0 | 0 | 0 |        | 1 Ref |
| FR751545 | Unassigned | Unassigned | Unassigned | 162_0  | Clustered           | 12 VC_162_0  | 12  | 0.9051 | 1          | 0.9051 | 0 | 0 | 0 |        | 1 Ref |
| FR775895 | Unassigned | Unassigned | Unassigned | 872_0  | Clustered           | 28 VC_872_0  | 28  | 0.7887 | 1          | 0.7887 | 0 | 0 | 0 |        | 1 Ref |
| FR823298 | Unassigned | Unassigned | Unassigned | 132_0  | Clustered           | 19 VC_132_0  | 19  | 0.6051 | 1          | 0.6051 | 0 | 0 | 0 |        | 1 Ref |
| FR823450 | Unassigned | Unassigned | Unassigned | 868_0  | Clustered           | 27 VC_868_0  | 27  | 0.9372 | 1          | 0.9372 | 0 | 0 | 0 |        | 1 Ref |
| FR852584 | Unassigned | Unassigned | Unassigned | 155_8  | Clustered           | 66 VC_155_8  | 66  | 0.4537 | 1          | 0.4537 | 0 | 0 | 0 | 0.8182 | Ref   |
| GQ141189 | Unassigned | Unassigned | Unassigned | 876_0  | Clustered           | 2 VC_876_0   | 2   | 0.4559 | 0.94489191 | 0.4308 | 0 | 0 | 0 |        | 1 Ref |
| GQ149088 | Unassigned | Unassigned | Unassigned | 760_0  | Clustered           | 15 VC_760_0  | 15  | 1      | 1          | 1      | 0 | 0 | 0 |        | 1 Ref |
| GQ153912 | Unassigned | Unassigned | Unassigned | 310_0  | Clustered           | 155 VC_310_0 | 155 | 0.9979 | 1          | 0.9979 | 0 | 0 | 0 |        | 1 Ref |
| GQ153913 | Unassigned | Unassigned | Unassigned | 310_0  | Clustered           | 155 VC_310_0 | 155 | 0.9979 | 1          | 0.9979 | 0 | 0 | 0 |        | 1 Ref |
| GQ153914 | Unassigned | Unassigned | Unassigned | 310_0  | Clustered           | 155 VC_310_0 | 155 | 0.9979 | 1          | 0.9979 | 0 | 0 | 0 |        | 1 Ref |
| GQ153915 | Unassigned | Unassigned | Unassigned | 310_0  | Clustered           | 155 VC_310_0 | 155 | 0.9979 | 1          | 0.9979 | 0 | 0 | 0 |        | 1 Ref |
| GQ153916 | Unassigned | Unassigned | Unassigned | 62_0   | Clustered           | 12 VC_62_0   | 12  | 0.7624 | 1          | 0.7624 | 0 | 0 | 0 |        | 1 Ref |
| GQ153917 | Unassigned | Unassigned | Unassigned | 62_0   | Clustered           | 12 VC_62_0   | 12  | 0.7624 | 1          | 0.7624 | 0 | 0 | 0 |        | 1 Ref |
| GQ153918 | Unassigned | Unassigned | Unassigned | 62_0   | Clustered           | 12 VC_62_0   | 12  | 0.7624 | 1          | 0.7624 | 0 | 0 | 0 |        | 1 Ref |
| GQ153919 | Unassigned | Unassigned | Unassigned | 62_0   | Clustered           | 12 VC_62_0   | 12  | 0.7624 | 1          | 0.7624 | 0 | 0 | 0 |        | 1 Ref |
| GQ153920 | Unassigned | Unassigned | Unassigned | 373_0  | Clustered           | 358 VC_373_0 | 358 | 0.9614 | 1          | 0.9614 | 0 | 0 | 0 |        | 1 Ref |
| GQ153921 | Unassigned | Unassigned | Unassigned | 375_0  | Clustered           | 2 VC_375_0   | 2   | 0.002  | 0.83307735 | 0.0017 | 0 | 0 | 0 |        | 1 Ref |
| GQ153922 | Unassigned | Unassigned | Unassigned | 373_0  | Clustered           | 358 VC_373_0 | 358 | 0.9614 | 1          | 0.9614 | 0 | 0 | 0 |        | 1 Ref |
| GQ153923 | Unassigned | Unassigned | Unassigned | 373_0  | Clustered           | 358 VC_373_0 | 358 | 0.9614 | 1          | 0.9614 | 0 | 0 | 0 |        | 1 Ref |
| GQ241246 | Unassigned | Unassigned | Unassigned | 880_0  | Clustered           | 4 VC_880_0   | 4   | 0.0727 | 0.88800114 | 0.0645 | 0 | 0 | 0 |        | 1 Ref |
| GQ303259 | Unassigned | Unassigned | Unassigned | 384_3  | Clustered           | 22 VC_384_3  | 22  | 0.0786 | 1          | 0.0786 | 0 | 0 | 0 | 0.9048 | Ref   |
| GQ303260 | Unassigned | Unassigned | Unassigned | 579_1  | Clustered           | 2 VC_579_1   | 2   | 0.0032 | 0.75989446 | 0.0024 | 0 | 0 | 0 |        | 0 Ref |
| GQ303261 | Unassigned | Unassigned | Unassigned | 783_0  | Clustered           | 67 VC_783_0  | 67  | 0.8945 | 1          | 0.8945 | 0 | 0 | 0 |        | 1 Ref |
| GQ303262 | Unassigned | Unassigned | Unassigned | 579_82 | Clustered           | 3 VC_579_82  | 3   | 0.0064 | 0.86736674 | 0.0056 | 0 | 0 | 0 | 0.6667 | Ref   |
| GQ303263 | Unassigned | Unassigned | Unassigned | 535_1  | Clustered           | 108 VC_535_1 | 108 | 0.8479 | 1          | 0.8479 | 0 | 0 | 0 | 0.9955 | Ref   |
| GQ303264 | Unassigned | Unassigned | Unassigned | 384_15 | Clustered           | 44 VC_384_15 | 44  | 0.139  | 1          | 0.139  | 0 | 0 | 0 | 0.7474 | Ref   |
| GQ303265 | Unassigned | Unassigned | Unassigned | 571_7  | Clustered           | 28 VC_571_7  | 28  | 0.1651 | 1          | 0.1651 | 0 | 0 | 0 | 0.8519 | Ref   |
| GQ303266 | Unassigned | Unassigned | Unassigned | 384_15 | Clustered           | 44 VC_384_15 | 44  | 0.139  | 1          | 0.139  | 0 | 0 | 0 | 0.7474 | Ref   |
| GQ357916 | Unassigned | Unassigned | Unassigned | 52_0   | Clustered           | 9 VC_52_0    | 9   | 0.5586 | 1          | 0.5586 | 0 | 0 | 0 |        | 1 Ref |
| GQ379227 | Unassigned | Unassigned | Unassigned | 387_0  | Clustered           | 2 VC_387_0   | 2   | 0.1249 | 0.95576264 | 0.1193 | 0 | 0 | 0 |        | 1 Ref |
| GQ398772 | Unassigned | Unassigned | Unassigned | 10_0   | Clustered           | 25 VC_10_0   | 25  | 0.3437 | 1          | 0.3437 | 0 | 0 | 0 | 0.9733 | Ref   |
| GQ403789 | Unassigned | Unassigned | Unassigned | 29_0   | Clustered           | 2 VC_29_0    | 2   | 1      | 1          | 1      | 0 | 0 | 0 |        | 1 Ref |
| GQ413937 | Unassigned | Unassigned | Unassigned | 848_0  | Clustered           | 124 VC_848_0 | 124 | 0.9484 | 1          | 0.9484 | 0 | 0 | 0 |        | 1 Ref |
| GQ413938 | Unassigned | Unassigned | Unassigned | 113_0  | Clustered           | 91 VC_113_0  | 91  | 0.9584 | 1          | 0.9584 | 0 | 0 | 0 |        | 1 Ref |
| GQ421471 | Unassigned | Unassigned | Unassigned | 287_0  | Clustered           | 2 VC_287_0   | 2   | 0.2918 | 0.9525588  | 0.2779 | 0 | 0 | 0 |        | 1 Ref |
| GQ422450 | Unassigned | Unassigned | Unassigned | 30_1   | Clustered           | 53 VC_30_1   | 53  | 0.7151 | 1          | 0.7151 | 0 | 0 | 0 | 0.9325 | Ref   |
| GQ422451 | Unassigned | Unassigned | Unassigned | 30_1   | Clustered           | 53 VC_30_1   | 53  | 0.7151 | 1          | 0.7151 | 0 | 0 | 0 | 0.9325 | Ref   |
| GQ443085 | Unassigned | Unassigned | Unassigned | 839_0  | Clustered           | 8 VC_839_0   | 8   | 0.9889 | 1          | 0.9889 | 0 | 0 | 0 |        | 1 Ref |
| GQ451696 | Unassigned | Unassigned | Unassigned | 889_0  | Clustered           | 13 VC_889_0  | 13  | 0.6844 | 1          | 0.6844 | 0 | 0 | 0 |        | 1 Ref |
| GQ452243 | Unassigned | Unassigned | Unassigned | 273_0  | Clustered           | 2 VC_273_0   | 2   | 0.1017 | 0.95560536 | 0.0972 | 0 | 0 | 0 |        | 1 Ref |
| GQ468526 | Unassigned | Unassigned | Unassigned | 399_0  | Clustered           | 49 VC_399_0  | 49  | 0.7927 | 1          | 0.7927 | 0 | 1 | 0 |        | 1 Ref |
| GQ478081 | Unassigned | Unassigned | Unassigned | 796_0  | Clustered           | 5 VC_796_0   | 5   | 0.3265 | 0.99999996 | 0.3265 | 0 | 0 | 0 |        | 1 Ref |
| GQ478082 | Unassigned | Unassigned | Unassigned | 796_0  | Clustered           | 5 VC_796_0   | 5   | 0.3265 | 0.99999996 | 0.3265 | 0 | 0 | 0 |        | 1 Ref |
| GQ478083 | Unassigned | Unassigned | Unassigned | 796_0  | Clustered           | 5 VC_796_0   | 5   | 0.3265 | 0.99999996 | 0.3265 | 0 | 0 | 0 |        | 1 Ref |
| GQ478084 | Unassigned | Unassigned | Unassigned | 796_0  | Clustered           | 5 VC_796_0   | 5   | 0.3265 | 0.99999996 | 0.3265 | 0 | 0 | 0 |        | 1 Ref |
| GQ478085 | Unassigned | Unassigned | Unassigned | 796_0  | Clustered           | 5 VC_796_0   | 5   | 0.3265 | 0.99999996 | 0.3265 | 0 | 0 | 0 |        | 1 Ref |
| GQ502199 | Unassigned | Unassigned | Unassigned | 859_0  | Clustered           | 67 VC_859_0  | 67  | 0.9622 | 1          | 0.9622 | 0 | 0 | 0 |        | 1 Ref |
| GQ915271 | Unassigned | Unassigned | Unassigned | 7_0    | Clustered           | 28 VC_7_0    | 28  | 0.389  | 1          | 0.389  | 0 | 0 | 0 | 0.9947 | Ref   |
| GQ979703 | Unassigned | Unassigned | Unassigned | 210_0  | Clustered           | 105 VC_210_0 | 105 | 0.4076 | 1          | 0.4076 | 0 | 0 | 0 | 0.7766 | Ref   |
| GQ981382 | Unassigned | Unassigned | Unassigned | 297_1  | Clustered           | 8 VC_297_1   | 8   | 0.0749 | 1          | 0.0749 | 0 | 0 | 0 | 0.8571 | Ref   |
| GU060500 | Unassigned | Unassigned | Unassigned | 538_31 | Clustered           | 11 VC_538_31 | 11  | 0.0894 | 1          | 0.0894 | 0 | 0 | 0 | 0.6    | Ref   |
| GU070616 | Unassigned | Unassigned | Unassigned | 601_5  | Clustered           | 4 VC_601_5   | 4   | 0.0525 | 0.99930943 | 0.0525 | 0 | 0 | 0 | 0.8333 | Ref   |
| GU071091 | Unassigned | Unassigned | Unassigned | 405_0  | Clustered           | 126 VC_405_0 | 126 | 0.9614 | 1          | 0.9614 | 0 | 0 | 0 |        | 1 Ref |
| GU071092 | Unassigned | Unassigned | Unassigned | 446_9  | Clustered           | 3 VC_446_9   | 3   | 0.0365 | 0.99848173 | 0.0364 | 0 | 0 | 0 |        | 1 Ref |
| GU071093 | Unassigned | Unassigned | Unassigned | 352_0  | Clustered           | 31 VC_352_0  | 31  | 0.9547 | 1          | 0.9547 | 0 | 0 | 0 |        | 1 Ref |
| GU071094 | Unassigned | Unassigned | Unassigned | 674_8  | Clustered/Singleton | 1 VC_674_8   | 1   | 0      | 1          | 0      | 0 | 0 | 0 |        | 1 Ref |
| GU071095 | Unassigned | Unassigned | Unassigned | 446_2  | Clustered/Singleton | 1 VC_446_2   | 1   | 0      | 1          | 0      | 0 | 0 | 0 |        | 1 Ref |
| GU071097 | Unassigned | Unassigned | Unassigned | 674_9  | Clustered/Singleton | 1 VC_674_9   | 1   | 0      | 1          | 0      | 0 | 0 | 0 |        | 1 Ref |
| GU071098 | Unassigned | Unassigned | Unassigned | 446_10 | Clustered           | 2 VC_446_10  | 2   | 0.0211 | 0.95772926 | 0.0202 | 0 | 0 | 0 |        | 1 Ref |
| GU071099 | Unassigned | Unassigned | Unassigned | 674_0  | Clustered           | 2 VC_674_0   | 2   | 0.0109 | 0.95704495 | 0.0105 | 0 | 0 | 0 |        | 1 Ref |
| GU071100 | Unassigned | Unassigned | Unassigned | 352_0  | Clustered           | 31 VC_352_0  | 31  | 0.9547 | 1          | 0.9547 | 0 | 0 | 0 |        | 1 Ref |
| GU071102 | Unassigned | Unassigned | Unassigned | 352_0  | Clustered           | 31 VC_352_0  | 31  | 0.9547 | 1          | 0.9547 | 0 | 0 | 0 |        | 1 Ref |
| GU071103 | Unassigned | Unassigned | Unassigned | 674_1  | Clustered/Singleton | 1 VC_674_1   | 1   | 0      | 1          | 0      | 0 | 0 | 0 |        | 1 Ref |
| GU071104 | Unassigned | Unassigned | Unassigned | 352_0  | Clustered           | 31 VC_352_0  | 31  | 0.9547 | 1          | 0.9547 | 0 | 0 | 0 |        | 1 Ref |
| GU071105 | Unassigned | Unassigned | Unassigned | 447_4  | Clustered           | 9 VC_447_4   | 9   | 0.127  | 1          | 0.127  | 0 | 0 | 0 |        | 1 Ref |
| GU071106 | Unassigned | Unassigned | Unassigned | 674_6  | Clustered           | 2 VC_674_6   | 2   | 0.0077 | 0.9577529  | 0.0074 | 0 | 0 | 0 |        | 1 Ref |
| GU071107 | Unassigned | Unassigned | Unassigned | 352_0  | Clustered           | 31 VC_352_0  | 31  | 0.9547 | 1          | 0.9547 | 0 | 0 | 0 |        | 1 Ref |
| GU080336 | Unassigned | Unassigned | Unassigned | 631_0  | Clustered           | 2 VC_631_0   | 2   | 1      | 1          | 1      | 0 | 0 | 0 |        | 1 Ref |
| GU169904 | Unassigned | Unassigned | Unassigned | 340_15 | Clustered/Singleton | 1 VC_340_15  | 1   | 0      | 1          | 0      | 0 | 0 | 0 |        | 1 Ref |
| GU196277 | Unassigned | Unassigned | Unassigned | 655_0  | Clustered           | 45 VC_655_0  | 45  | 0.7722 | 1          | 0.7722 | 0 | 0 | 0 |        | 1 Ref |
| GU196278 | Unassigned | Unassigned | Unassigned | 655_0  | Clustered           | 45 VC_655_0  | 45  | 0.7722 | 1          | 0.7722 | 0 | 0 | 0 |        | 1 Ref |
| GU196279 | Unassigned | Unassigned | Unassigned | 655_0  | Clustered           | 45 VC_655_0  | 45  | 0.7722 | 1          | 0.7722 | 0 | 0 | 0 |        | 1 Ref |
| GU196280 | Unassigned | Unassigned | Unassigned | 655_0  | Clustered           | 45 VC_655_0  | 45  | 0.7722 | 1          | 0.7722 | 0 | 0 | 0 |        | 1 Ref |
| GU196281 | Unassigned | Unassigned | Unassigned | 655_0  | Clustered           | 45 VC_655_0  | 45  | 0.7722 | 1          | 0.7722 | 0 | 0 | 0 |        | 1 Ref |
| GU229986 | Unassigned | Unassigned | Unassigned | 671_0  | Clustered           | 4 VC_671_0   | 4   | 0.4756 | 0.99998076 | 0.4756 | 0 | 0 | 0 |        | 1 Ref |
| GU247132 | Unassigned | Unassigned | Unassigned | 335_14 | Clustered           | 3 VC_335_14  | 3   | 0.0094 | 0.9985917  | 0.0094 | 0 | 0 | 0 |        | 1 Ref |
| GU247133 | Unassigned | Unassigned | Unassigned | 384_16 | Clustered           | 42 VC_384_16 | 42  | 0.134  | 1          | 0.134  | 0 | 0 | 0 | 0.7282 | Ref   |



|          |            |            |            |        |                     |              |     |        |            |        |   |   |   |        |     |
|----------|------------|------------|------------|--------|---------------------|--------------|-----|--------|------------|--------|---|---|---|--------|-----|
| GU247134 | Unassigned | Unassigned | Unassigned | 384_16 | Clustered           | 42 VC_384_16 | 42  | 0.134  | 1          | 0.134  | 0 | 0 | 0 | 0.7282 | Ref |
| GU295964 | Unassigned | Unassigned | Unassigned | 686_0  | Clustered           | 25 VC_686_0  | 25  | 0.5501 | 1          | 0.5501 | 0 | 0 | 0 | 0.96   | Ref |
| GU296433 | Unassigned | Unassigned | Unassigned | 868_0  | Clustered           | 27 VC_868_0  | 27  | 0.9372 | 1          | 0.9372 | 0 | 0 | 0 | 1      | Ref |
| GU321093 | Unassigned | Unassigned | Unassigned | 858_0  | Clustered           | 7 VC_858_0   | 7   | 1      | 1          | 1      | 0 | 0 | 0 | 1      | Ref |
| GU323708 | Unassigned | Unassigned | Unassigned | 280_0  | Clustered           | 4 VC_280_0   | 4   | 0.3169 | 0.99994916 | 0.3169 | 0 | 0 | 0 | 0.8333 | Ref |
| GU339467 | Unassigned | Unassigned | Unassigned | 223_3  | Clustered           | 8 VC_223_3   | 8   | 0.0699 | 1          | 0.0699 | 0 | 0 | 0 | 0.8571 | Ref |
| GU385905 | Unassigned | Unassigned | Unassigned | 310_0  | Clustered           | 155 VC_310_0 | 155 | 0.9979 | 1          | 0.9979 | 0 | 0 | 0 | 1      | Ref |
| GU393987 | Unassigned | Unassigned | Unassigned | 71_0   | Clustered           | 27 VC_71_0   | 27  | 0.5964 | 1          | 0.5964 | 0 | 0 | 0 | 0.9943 | Ref |
| GU396103 | Unassigned | Unassigned | Unassigned | 457_0  | Clustered           | 7 VC_457_0   | 7   | 0.2549 | 1          | 0.2549 | 0 | 0 | 0 | 0.7143 | Ref |
| GU459069 | Unassigned | Unassigned | Unassigned | 457_3  | Clustered           | 2 VC_457_3   | 2   | 0.0286 | 0.89347378 | 0.0255 | 0 | 0 | 0 | 1      | Ref |
| GU477322 | Unassigned | Unassigned | Unassigned | 9_0    | Clustered           | 38 VC_9_0    | 38  | 0.4859 | 1          | 0.4859 | 0 | 0 | 0 | 1      | Ref |
| GU557055 | Unassigned | Unassigned | Unassigned | 312_0  | Clustered           | 12 VC_312_0  | 12  | 0.5719 | 1          | 0.5719 | 0 | 0 | 0 | 0.8485 | Ref |
| GU573886 | Unassigned | Unassigned | Unassigned | 30_1   | Clustered           | 53 VC_30_1   | 53  | 0.7151 | 1          | 0.7151 | 0 | 0 | 0 | 0.9325 | Ref |
| GU580941 | Unassigned | Unassigned | Unassigned | 898_0  | Clustered           | 2 VC_898_0   | 2   | 0.0372 | 0.95472903 | 0.0355 | 0 | 0 | 0 | 1      | Ref |
| GU580942 | Unassigned | Unassigned | Unassigned | 898_0  | Clustered           | 2 VC_898_0   | 2   | 0.0372 | 0.95472903 | 0.0355 | 0 | 0 | 0 | 1      | Ref |
| GU583987 | Unassigned | Unassigned | Unassigned | 132_0  | Clustered           | 19 VC_132_0  | 19  | 0.6051 | 1          | 0.6051 | 0 | 0 | 0 | 1      | Ref |
| GU595417 | Unassigned | Unassigned | Unassigned | 466_0  | Clustered           | 66 VC_466_0  | 66  | 0.9246 | 1          | 0.9246 | 0 | 0 | 0 | 1      | Ref |
| GU815091 | Unassigned | Unassigned | Unassigned | 80_7   | Clustered           | 33 VC_80_7   | 33  | 0.2156 | 1          | 0.2156 | 0 | 0 | 0 | 0.8409 | Ref |
| GU903191 | Unassigned | Unassigned | Unassigned | 127_0  | Clustered           | 17 VC_127_0  | 17  | 0.9222 | 1          | 0.9222 | 0 | 0 | 0 | 1      | Ref |
| GU911303 | Unassigned | Unassigned | Unassigned | 1_0    | Clustered           | 54 VC_1_0    | 54  | 0.8518 | 1          | 0.8518 | 0 | 0 | 0 | 1      | Ref |
| GU911304 | Unassigned | Unassigned | Unassigned | 3_0    | Clustered           | 17 VC_3_0    | 17  | 0.5615 | 1          | 0.5615 | 0 | 0 | 0 | 1      | Ref |
| GU911519 | Unassigned | Unassigned | Unassigned | 510_3  | Clustered/Singleton | 1 VC_510_3   | 1   | 0      | 1          | 0      | 0 | 0 | 0 | 1      | Ref |
| GU936715 | Unassigned | Unassigned | Unassigned | 902_0  | Clustered           | 3 VC_902_0   | 3   | 0.8989 | 0.98968122 | 0.8896 | 0 | 0 | 0 | 1      | Ref |
| GU942563 | Unassigned | Unassigned | Unassigned | 904_0  | Clustered           | 10 VC_904_0  | 10  | 0.9878 | 0.99948433 | 0.9873 | 0 | 0 | 0 | 1      | Ref |
| GU943054 | Unassigned | Unassigned | Unassigned | 352_0  | Clustered           | 31 VC_352_0  | 31  | 0.9547 | 1          | 0.9547 | 0 | 0 | 0 | 1      | Ref |
| GU967410 | Unassigned | Unassigned | Unassigned | 145_0  | Clustered           | 6 VC_145_0   | 6   | 0.2581 | 0.86251824 | 0.2226 | 0 | 0 | 0 | 0.8667 | Ref |
| GU988610 | Unassigned | Unassigned | Unassigned | 77_0   | Clustered           | 37 VC_77_0   | 37  | 0.9392 | 1          | 0.9392 | 0 | 0 | 0 | 1      | Ref |
| HE584812 | Unassigned | Unassigned | Unassigned | 185_0  | Clustered           | 53 VC_185_0  | 53  | 0.9153 | 1          | 0.9153 | 0 | 0 | 0 | 1      | Ref |
| HE600015 | Unassigned | Unassigned | Unassigned | 133_0  | Clustered           | 17 VC_133_0  | 17  | 0.2654 | 1          | 0.2654 | 0 | 0 | 0 | 1      | Ref |
| HE608841 | Unassigned | Unassigned | Unassigned | 854_0  | Clustered           | 6 VC_854_0   | 6   | 0.514  | 1          | 0.514  | 0 | 0 | 0 | 1      | Ref |
| HE664024 | Unassigned | Unassigned | Unassigned | 44_0   | Clustered           | 49 VC_44_0   | 49  | 0.4506 | 1          | 0.4506 | 0 | 0 | 0 | 0.8605 | Ref |
| HE775250 | Unassigned | Unassigned | Unassigned | 654_0  | Clustered           | 115 VC_654_0 | 115 | 0.7303 | 1          | 0.7303 | 0 | 0 | 0 | 0.8764 | Ref |
| HE806280 | Unassigned | Unassigned | Unassigned | 713_0  | Clustered           | 26 VC_713_0  | 26  | 0.9358 | 1          | 0.9358 | 0 | 0 | 0 | 1      | Ref |
| HE815464 | Unassigned | Unassigned | Unassigned | 867_0  | Clustered           | 5 VC_867_0   | 5   | 0.2806 | 0.99999994 | 0.2806 | 0 | 0 | 0 | 1      | Ref |
| HE858210 | Unassigned | Unassigned | Unassigned | 687_1  | Clustered           | 10 VC_687_1  | 10  | 0.1263 | 1          | 0.1263 | 0 | 0 | 0 | 0.9778 | Ref |
| HE861935 | Unassigned | Unassigned | Unassigned | 260_0  | Clustered           | 46 VC_260_0  | 46  | 0.5137 | 1          | 0.5137 | 0 | 0 | 0 | 1      | Ref |
| HE956704 | Unassigned | Unassigned | Unassigned | 275_0  | Clustered           | 6 VC_275_0   | 6   | 0.6515 | 0.99999994 | 0.6515 | 0 | 0 | 0 | 0.9333 | Ref |
| HE956707 | Unassigned | Unassigned | Unassigned | 907_0  | Clustered           | 32 VC_907_0  | 32  | 0.9964 | 1          | 0.9964 | 0 | 0 | 0 | 1      | Ref |
| HE956708 | Unassigned | Unassigned | Unassigned | 199_26 | Clustered/Singleton | 1 VC_199_26  | 1   | 0      | 1          | 0      | 0 | 0 | 0 | 1      | Ref |
| HE956709 | Unassigned | Unassigned | Unassigned | 508_3  | Clustered           | 2 VC_508_3   | 2   | 0.0132 | 0.95703149 | 0.0126 | 0 | 0 | 0 | 1      | Ref |
| HE956710 | Unassigned | Unassigned | Unassigned | 907_0  | Clustered           | 32 VC_907_0  | 32  | 0.9964 | 1          | 0.9964 | 0 | 0 | 0 | 1      | Ref |
| HE956711 | Unassigned | Unassigned | Unassigned | 290_69 | Clustered/Singleton | 1 VC_290_69  | 1   | 0      | 1          | 0      | 0 | 0 | 0 | 1      | Ref |
| HE962497 | Unassigned | Unassigned | Unassigned | 110_0  | Clustered           | 33 VC_110_0  | 33  | 0.9488 | 1          | 0.9488 | 0 | 0 | 0 | 1      | Ref |
| HE978309 | Unassigned | Unassigned | Unassigned | 609_0  | Clustered           | 27 VC_609_0  | 27  | 0.9943 | 1          | 0.9943 | 0 | 0 | 0 | 1      | Ref |
| HE981739 | Unassigned | Unassigned | Unassigned | 687_1  | Clustered           | 10 VC_687_1  | 10  | 0.1263 | 1          | 0.1263 | 0 | 0 | 0 | 0.9778 | Ref |
| HE983844 | Unassigned | Unassigned | Unassigned | 486_0  | Clustered           | 47 VC_486_0  | 47  | 0.9022 | 1          | 0.9022 | 0 | 0 | 0 | 1      | Ref |
| HE983845 | Unassigned | Unassigned | Unassigned | 77_0   | Clustered           | 37 VC_77_0   | 37  | 0.9392 | 1          | 0.9392 | 0 | 0 | 0 | 1      | Ref |
| HF543949 | Unassigned | Unassigned | Unassigned | 486_0  | Clustered           | 47 VC_486_0  | 47  | 0.9022 | 1          | 0.9022 | 0 | 0 | 0 | 1      | Ref |
| HF563658 | Unassigned | Unassigned | Unassigned | 425_0  | Clustered           | 40 VC_425_0  | 40  | 0.8399 | 1          | 0.8399 | 0 | 0 | 0 | 0.9974 | Ref |
| HF569088 | Unassigned | Unassigned | Unassigned | 908_0  | Clustered           | 36 VC_908_0  | 36  | 0.9943 | 1          | 0.9943 | 0 | 0 | 0 | 1      | Ref |
| HF569089 | Unassigned | Unassigned | Unassigned | 908_0  | Clustered           | 36 VC_908_0  | 36  | 0.9943 | 1          | 0.9943 | 0 | 0 | 0 | 1      | Ref |
| HF569090 | Unassigned | Unassigned | Unassigned | 908_0  | Clustered           | 36 VC_908_0  | 36  | 0.9943 | 1          | 0.9943 | 0 | 0 | 0 | 1      | Ref |
| HF569091 | Unassigned | Unassigned | Unassigned | 908_0  | Clustered           | 36 VC_908_0  | 36  | 0.9943 | 1          | 0.9943 | 0 | 0 | 0 | 1      | Ref |
| HF569092 | Unassigned | Unassigned | Unassigned | 908_0  | Clustered           | 36 VC_908_0  | 36  | 0.9943 | 1          | 0.9943 | 0 | 0 | 0 | 1      | Ref |
| HF937074 | Unassigned | Unassigned | Unassigned | 98_0   | Clustered           | 30 VC_98_0   | 30  | 0.7175 | 1          | 0.7175 | 0 | 0 | 0 | 1      | Ref |
| HG007973 | Unassigned | Unassigned | Unassigned | 909_0  | Clustered           | 2 VC_909_0   | 2   | 0.1608 | 0.83455073 | 0.1342 | 0 | 0 | 0 | 1      | Ref |
| HG315669 | Unassigned | Unassigned | Unassigned | 183_0  | Clustered           | 5 VC_183_0   | 5   | 0.7449 | 0.99885646 | 0.744  | 0 | 0 | 0 | 1      | Ref |
| HG322870 | Unassigned | Unassigned | Unassigned | 460_0  | Clustered           | 4 VC_460_0   | 4   | 0.7519 | 0.99987768 | 0.7518 | 0 | 0 | 0 | 1      | Ref |
| HG380752 | Unassigned | Unassigned | Unassigned | 260_0  | Clustered           | 46 VC_260_0  | 46  | 0.5137 | 1          | 0.5137 | 0 | 0 | 0 | 1      | Ref |
| HG424323 | Unassigned | Unassigned | Unassigned | 260_0  | Clustered           | 46 VC_260_0  | 46  | 0.5137 | 1          | 0.5137 | 0 | 0 | 0 | 1      | Ref |
| HG428758 | Unassigned | Unassigned | Unassigned | 908_0  | Clustered           | 36 VC_908_0  | 36  | 0.9943 | 1          | 0.9943 | 0 | 0 | 0 | 1      | Ref |
| HG518155 | Unassigned | Unassigned | Unassigned | 486_0  | Clustered           | 47 VC_486_0  | 47  | 0.9022 | 1          | 0.9022 | 0 | 0 | 0 | 1      | Ref |
| HG531805 | Unassigned | Unassigned | Unassigned | 140_1  | Clustered           | 4 VC_140_1   | 4   | 0.1766 | 0.99998565 | 0.1766 | 0 | 0 | 0 | 1      | Ref |
| HG792102 | Unassigned | Unassigned | Unassigned | 44_0   | Clustered           | 49 VC_44_0   | 49  | 0.4506 | 1          | 0.4506 | 0 | 0 | 0 | 0.8605 | Ref |
| HG792103 | Unassigned | Unassigned | Unassigned | 44_0   | Clustered           | 49 VC_44_0   | 49  | 0.4506 | 1          | 0.4506 | 0 | 0 | 0 | 0.8605 | Ref |
| HG792104 | Unassigned | Unassigned | Unassigned | 44_0   | Clustered           | 49 VC_44_0   | 49  | 0.4506 | 1          | 0.4506 | 0 | 0 | 0 | 0.8605 | Ref |
| HG792105 | Unassigned | Unassigned | Unassigned | 44_0   | Clustered           | 49 VC_44_0   | 49  | 0.4506 | 1          | 0.4506 | 0 | 0 | 0 | 0.8605 | Ref |
| HG793132 | Unassigned | Unassigned | Unassigned | 71_0   | Clustered           | 27 VC_71_0   | 27  | 0.5964 | 1          | 0.5964 | 0 | 0 | 0 | 0.9943 | Ref |
| HG796219 | Unassigned | Unassigned | Unassigned | 71_0   | Clustered           | 27 VC_71_0   | 27  | 0.5964 | 1          | 0.5964 | 0 | 0 | 0 | 0.9943 | Ref |
| HG796220 | Unassigned | Unassigned | Unassigned | 71_0   | Clustered           | 27 VC_71_0   | 27  | 0.5964 | 1          | 0.5964 | 0 | 0 | 0 | 0.9943 | Ref |
| HG796221 | Unassigned | Unassigned | Unassigned | 71_0   | Clustered           | 27 VC_71_0   | 27  | 0.5964 | 1          | 0.5964 | 0 | 0 | 0 | 0.9943 | Ref |
| HG796225 | Unassigned | Unassigned | Unassigned | 666_0  | Clustered           | 11 VC_666_0  | 11  | 0.5822 | 1          | 0.5822 | 0 | 0 | 0 | 1      | Ref |
| HG798901 | Unassigned | Unassigned | Unassigned | 666_0  | Clustered           | 11 VC_666_0  | 11  | 0.5822 | 1          | 0.5822 | 0 | 0 | 0 | 1      | Ref |
| HG799490 | Unassigned | Unassigned | Unassigned | 427_0  | Clustered           | 37 VC_427_0  | 37  | 0.5729 | 1          | 0.5729 | 0 | 0 | 0 | 0.9474 | Ref |
| HG799496 | Unassigned | Unassigned | Unassigned | 427_0  | Clustered           | 37 VC_427_0  | 37  | 0.5729 | 1          | 0.5729 | 0 | 0 | 0 | 0.9474 | Ref |
| HG799497 | Unassigned | Unassigned | Unassigned | 427_0  | Clustered           | 37 VC_427_0  | 37  | 0.5729 | 1          | 0.5729 | 0 | 0 | 0 | 0.9474 | Ref |
| HG803181 | Unassigned | Unassigned | Unassigned | 5_0    | Clustered           | 27 VC_5_0    | 27  | 0.9599 | 1          | 0.9599 | 0 | 0 | 0 | 1      | Ref |
| HG803182 | Unassigned | Unassigned | Unassigned | 44_0   | Clustered           | 49 VC_44_0   | 49  | 0.4506 | 1          | 0.4506 | 0 | 0 | 0 | 0.8605 | Ref |
| HG803183 | Unassigned | Unassigned | Unassigned | 44_0   | Clustered           | 49 VC_44_0   | 49  | 0.4506 | 1          | 0.4506 | 0 | 0 | 0 | 0.8605 | Ref |
| HG803184 | Unassigned | Unassigned | Unassigned | 44_0   | Clustered           | 49 VC_44_0   | 49  | 0.4506 | 1          | 0.4506 | 0 | 0 | 0 | 0.8605 | Ref |
| HG803185 | Unassigned | Unassigned | Unassigned | 44_0   | Clustered           | 49 VC_44_0   | 49  | 0.4506 | 1          | 0.4506 | 0 | 0 | 0 | 0.8605 | Ref |



|          |            |            |            |         |                     |              |     |        |            |        |   |   |   |            |
|----------|------------|------------|------------|---------|---------------------|--------------|-----|--------|------------|--------|---|---|---|------------|
| HG813241 | Unassigned | Unassigned | Unassigned | 465_0   | Clustered           | 80 VC_465_0  | 80  | 0.9988 | 1          | 0.9988 | 0 | 0 | 0 | 1 Ref      |
| HG818823 | Unassigned | Unassigned | Unassigned | 465_0   | Clustered           | 80 VC_465_0  | 80  | 0.9988 | 1          | 0.9988 | 0 | 0 | 0 | 1 Ref      |
| HG818824 | Unassigned | Unassigned | Unassigned | 465_0   | Clustered           | 80 VC_465_0  | 80  | 0.9988 | 1          | 0.9988 | 0 | 0 | 0 | 1 Ref      |
| HG934469 | Unassigned | Unassigned | Unassigned | 654_0   | Clustered           | 115 VC_654_0 | 115 | 0.7303 | 1          | 0.7303 | 0 | 0 | 0 | 0.8764 Ref |
| HG934470 | Unassigned | Unassigned | Unassigned | 654_0   | Clustered           | 115 VC_654_0 | 115 | 0.7303 | 1          | 0.7303 | 0 | 0 | 0 | 0.8764 Ref |
| HG962375 | Unassigned | Unassigned | Unassigned | 862_0   | Clustered           | 29 VC_862_0  | 29  | 0.8594 | 1          | 0.8594 | 0 | 0 | 0 | 1 Ref      |
| HG962376 | Unassigned | Unassigned | Unassigned | 766_0   | Clustered           | 40 VC_766_0  | 40  | 0.7511 | 1          | 0.7511 | 0 | 0 | 0 | 1 Ref      |
| HG992588 | Unassigned | Unassigned | Unassigned | 911_0   | Clustered           | 20 VC_911_0  | 20  | 0.9915 | 1          | 0.9915 | 0 | 0 | 0 | 1 Ref      |
| HG994092 | Unassigned | Unassigned | Unassigned | 848_0   | Clustered           | 124 VC_848_0 | 124 | 0.9484 | 1          | 0.9484 | 0 | 0 | 0 | 1 Ref      |
| HM004124 | Unassigned | Unassigned | Unassigned | 510_4   | Clustered/Singleton | 1 VC_510_4   | 1   | 0      | 1          | 0      | 0 | 0 | 0 | 1 Ref      |
| HM029250 | Unassigned | Unassigned | Unassigned | 488_0   | Clustered           | 14 VC_488_0  | 14  | 0.8516 | 1          | 0.8516 | 0 | 0 | 0 | 1 Ref      |
| HM032710 | Unassigned | Unassigned | Unassigned | 510_5   | Clustered/Singleton | 1 VC_510_5   | 1   | 0      | 1          | 0      | 0 | 0 | 0 | 1 Ref      |
| HM035024 | Unassigned | Unassigned | Unassigned | 595_0   | Clustered           | 35 VC_595_0  | 35  | 0.8809 | 1          | 0.8809 | 0 | 0 | 0 | 1 Ref      |
| HM035025 | Unassigned | Unassigned | Unassigned | 290_154 | Clustered/Singleton | 1 VC_290_154 | 1   | 0      | 1          | 0      | 0 | 0 | 0 | 1 Ref      |
| HM064452 | Unassigned | Unassigned | Unassigned | 55_0    | Clustered           | 5 VC_55_0    | 5   | 0.4963 | 0.99999808 | 0.4963 | 0 | 0 | 0 | 1 Ref      |
| HM066936 | Unassigned | Unassigned | Unassigned | 234_0   | Clustered           | 2 VC_234_0   | 2   | 0.3333 | 0          | 0      | 0 | 0 | 0 | 1 Ref      |
| HM071924 | Unassigned | Unassigned | Unassigned | 297_5   | Clustered           | 14 VC_297_5  | 14  | 0.141  | 1          | 0.141  | 0 | 0 | 0 | 0.9231 Ref |
| HM072038 | Unassigned | Unassigned | Unassigned | 18_0    | Clustered           | 4 VC_18_0    | 4   | 0.8969 | 0.99987935 | 0.8968 | 0 | 0 | 0 | 1 Ref      |
| HM114315 | Unassigned | Unassigned | Unassigned | 510_6   | Clustered/Singleton | 1 VC_510_6   | 1   | 0      | 1          | 0      | 0 | 0 | 0 | 1 Ref      |
| HM134276 | Unassigned | Unassigned | Unassigned | 687_1   | Clustered           | 10 VC_687_1  | 10  | 0.1263 | 1          | 0.1263 | 0 | 0 | 0 | 0.9778 Ref |
| HM137666 | Unassigned | Unassigned | Unassigned | 290_91  | Clustered           | 11 VC_290_91 | 11  | 0.0281 | 1          | 0.0281 | 0 | 0 | 0 | 1 Ref      |
| HM144387 | Unassigned | Unassigned | Unassigned | 913_1   | Clustered           | 8 VC_913_1   | 8   | 0.1102 | 0.99893323 | 0.11   | 0 | 0 | 0 | 0.75 Ref   |
| HM150760 | Unassigned | Unassigned | Unassigned | 909_0   | Clustered           | 2 VC_909_0   | 2   | 0.1608 | 0.83455073 | 0.1342 | 0 | 0 | 0 | 1 Ref      |
| HM152764 | Unassigned | Unassigned | Unassigned | 243_0   | Clustered           | 72 VC_243_0  | 72  | 0.8089 | 1          | 0.8089 | 0 | 0 | 0 | 1 Ref      |
| HM152765 | Unassigned | Unassigned | Unassigned | 536_0   | Clustered           | 6 VC_536_0   | 6   | 0.129  | 1          | 0.129  | 0 | 0 | 0 | 1 Ref      |
| HM152766 | Unassigned | Unassigned | Unassigned | 535_1   | Clustered           | 108 VC_535_1 | 108 | 0.8479 | 1          | 0.8479 | 0 | 0 | 0 | 0.9955 Ref |
| HM152767 | Unassigned | Unassigned | Unassigned | 243_0   | Clustered           | 72 VC_243_0  | 72  | 0.8089 | 1          | 0.8089 | 0 | 0 | 0 | 1 Ref      |
| HM159959 | Unassigned | Unassigned | Unassigned | 149_0   | Clustered/Singleton | 1 VC_149_0   | 1   | 0      | 1          | 0      | 0 | 0 | 0 | 1 Ref      |
| HM208303 | Unassigned | Unassigned | Unassigned | 35_0    | Clustered           | 35 VC_35_0   | 35  | 0.431  | 1          | 0.431  | 0 | 0 | 0 | 1 Ref      |
| HM208537 | Unassigned | Unassigned | Unassigned | 237_1   | Clustered/Singleton | 1 VC_237_1   | 1   | 0      | 1          | 0      | 0 | 0 | 0 | 1 Ref      |
| HM242243 | Unassigned | Unassigned | Unassigned | 96_0    | Clustered           | 2 VC_96_0    | 2   | 0.1257 | 0.95725182 | 0.1204 | 0 | 0 | 0 | 1 Ref      |
| HM368260 | Unassigned | Unassigned | Unassigned | 713_0   | Clustered           | 26 VC_713_0  | 26  | 0.9358 | 1          | 0.9358 | 0 | 0 | 0 | 1 Ref      |
| HM452125 | Unassigned | Unassigned | Unassigned | 619_2   | Clustered           | 10 VC_619_2  | 10  | 0.3034 | 1          | 0.3034 | 0 | 0 | 0 | 1 Ref      |
| HM452126 | Unassigned | Unassigned | Unassigned | 457_0   | Clustered           | 7 VC_457_0   | 7   | 0.2549 | 1          | 0.2549 | 0 | 0 | 0 | 0.7143 Ref |
| HM461982 | Unassigned | Unassigned | Unassigned | 3_0     | Clustered           | 17 VC_3_0    | 17  | 0.5615 | 1          | 0.5615 | 0 | 0 | 0 | 1 Ref      |
| HM480106 | Unassigned | Unassigned | Unassigned | 902_0   | Clustered           | 3 VC_902_0   | 3   | 0.8989 | 0.98968122 | 0.8896 | 0 | 0 | 0 | 1 Ref      |
| HM480846 | Unassigned | Unassigned | Unassigned | 848_0   | Clustered           | 124 VC_848_0 | 124 | 0.9484 | 1          | 0.9484 | 0 | 0 | 0 | 1 Ref      |
| HM559717 | Unassigned | Unassigned | Unassigned | 352_0   | Clustered           | 31 VC_352_0  | 31  | 0.9547 | 1          | 0.9547 | 0 | 0 | 0 | 1 Ref      |
| HM563683 | Unassigned | Unassigned | Unassigned | 297_2   | Clustered           | 2 VC_297_2   | 2   | 0.0101 | 0.92290095 | 0.0093 | 0 | 0 | 0 | 1 Ref      |
| HM568888 | Unassigned | Unassigned | Unassigned | 749_0   | Clustered           | 5 VC_749_0   | 5   | 0.4704 | 0.99999995 | 0.4704 | 0 | 0 | 0 | 1 Ref      |
| HM588722 | Unassigned | Unassigned | Unassigned | 925_0   | Clustered           | 3 VC_925_0   | 3   | 0.6333 | 0.99692152 | 0.6314 | 0 | 0 | 0 | 1 Ref      |
| HM624080 | Unassigned | Unassigned | Unassigned | 185_0   | Clustered           | 53 VC_185_0  | 53  | 0.9153 | 1          | 0.9153 | 0 | 0 | 0 | 1 Ref      |
| HM640230 | Unassigned | Unassigned | Unassigned | 928_0   | Clustered           | 6 VC_928_0   | 6   | 0.4065 | 1          | 0.4065 | 0 | 0 | 0 | 1 Ref      |
| HM753658 | Unassigned | Unassigned | Unassigned | 310_0   | Clustered           | 155 VC_310_0 | 155 | 0.9979 | 1          | 0.9979 | 0 | 0 | 0 | 1 Ref      |
| HM753659 | Unassigned | Unassigned | Unassigned | 310_0   | Clustered           | 155 VC_310_0 | 155 | 0.9979 | 1          | 0.9979 | 0 | 0 | 0 | 1 Ref      |
| HM753660 | Unassigned | Unassigned | Unassigned | 310_0   | Clustered           | 155 VC_310_0 | 155 | 0.9979 | 1          | 0.9979 | 0 | 0 | 0 | 1 Ref      |
| HM753661 | Unassigned | Unassigned | Unassigned | 310_0   | Clustered           | 155 VC_310_0 | 155 | 0.9979 | 1          | 0.9979 | 0 | 0 | 0 | 1 Ref      |
| HM753662 | Unassigned | Unassigned | Unassigned | 310_0   | Clustered           | 155 VC_310_0 | 155 | 0.9979 | 1          | 0.9979 | 0 | 0 | 0 | 1 Ref      |
| HM753663 | Unassigned | Unassigned | Unassigned | 310_0   | Clustered           | 155 VC_310_0 | 155 | 0.9979 | 1          | 0.9979 | 0 | 0 | 0 | 1 Ref      |
| HM753664 | Unassigned | Unassigned | Unassigned | 310_0   | Clustered           | 155 VC_310_0 | 155 | 0.9979 | 1          | 0.9979 | 0 | 0 | 0 | 1 Ref      |
| HM753665 | Unassigned | Unassigned | Unassigned | 310_0   | Clustered           | 155 VC_310_0 | 155 | 0.9979 | 1          | 0.9979 | 0 | 0 | 0 | 1 Ref      |
| HM753666 | Unassigned | Unassigned | Unassigned | 310_0   | Clustered           | 155 VC_310_0 | 155 | 0.9979 | 1          | 0.9979 | 0 | 0 | 0 | 1 Ref      |
| HM753667 | Unassigned | Unassigned | Unassigned | 310_0   | Clustered           | 155 VC_310_0 | 155 | 0.9979 | 1          | 0.9979 | 0 | 0 | 0 | 1 Ref      |
| HM753668 | Unassigned | Unassigned | Unassigned | 310_0   | Clustered           | 155 VC_310_0 | 155 | 0.9979 | 1          | 0.9979 | 0 | 0 | 0 | 1 Ref      |
| HM753669 | Unassigned | Unassigned | Unassigned | 310_0   | Clustered           | 155 VC_310_0 | 155 | 0.9979 | 1          | 0.9979 | 0 | 0 | 0 | 1 Ref      |
| HM753670 | Unassigned | Unassigned | Unassigned | 310_0   | Clustered           | 155 VC_310_0 | 155 | 0.9979 | 1          | 0.9979 | 0 | 0 | 0 | 1 Ref      |
| HM753671 | Unassigned | Unassigned | Unassigned | 310_0   | Clustered           | 155 VC_310_0 | 155 | 0.9979 | 1          | 0.9979 | 0 | 0 | 0 | 1 Ref      |
| HM753672 | Unassigned | Unassigned | Unassigned | 310_0   | Clustered           | 155 VC_310_0 | 155 | 0.9979 | 1          | 0.9979 | 0 | 0 | 0 | 1 Ref      |
| HM753673 | Unassigned | Unassigned | Unassigned | 310_0   | Clustered           | 155 VC_310_0 | 155 | 0.9979 | 1          | 0.9979 | 0 | 0 | 0 | 1 Ref      |
| HM753674 | Unassigned | Unassigned | Unassigned | 310_0   | Clustered           | 155 VC_310_0 | 155 | 0.9979 | 1          | 0.9979 | 0 | 0 | 0 | 1 Ref      |
| HM753675 | Unassigned | Unassigned | Unassigned | 310_0   | Clustered           | 155 VC_310_0 | 155 | 0.9979 | 1          | 0.9979 | 0 | 0 | 0 | 1 Ref      |
| HM753676 | Unassigned | Unassigned | Unassigned | 310_0   | Clustered           | 155 VC_310_0 | 155 | 0.9979 | 1          | 0.9979 | 0 | 0 | 0 | 1 Ref      |
| HM753677 | Unassigned | Unassigned | Unassigned | 310_0   | Clustered           | 155 VC_310_0 | 155 | 0.9979 | 1          | 0.9979 | 0 | 0 | 0 | 1 Ref      |
| HM753678 | Unassigned | Unassigned | Unassigned | 310_0   | Clustered           | 155 VC_310_0 | 155 | 0.9979 | 1          | 0.9979 | 0 | 0 | 0 | 1 Ref      |
| HM753679 | Unassigned | Unassigned | Unassigned | 310_0   | Clustered           | 155 VC_310_0 | 155 | 0.9979 | 1          | 0.9979 | 0 | 0 | 0 | 1 Ref      |
| HM753680 | Unassigned | Unassigned | Unassigned | 310_0   | Clustered           | 155 VC_310_0 | 155 | 0.9979 | 1          | 0.9979 | 0 | 0 | 0 | 1 Ref      |
| HM753681 | Unassigned | Unassigned | Unassigned | 310_0   | Clustered           | 155 VC_310_0 | 155 | 0.9979 | 1          | 0.9979 | 0 | 0 | 0 | 1 Ref      |
| HM753682 | Unassigned | Unassigned | Unassigned | 310_0   | Clustered           | 155 VC_310_0 | 155 | 0.9979 | 1          | 0.9979 | 0 | 0 | 0 | 1 Ref      |
| HM753683 | Unassigned | Unassigned | Unassigned | 310_0   | Clustered           | 155 VC_310_0 | 155 | 0.9979 | 1          | 0.9979 | 0 | 0 | 0 | 1 Ref      |
| HM753684 | Unassigned | Unassigned | Unassigned | 310_0   | Clustered           | 155 VC_310_0 | 155 | 0.9979 | 1          | 0.9979 | 0 | 0 | 0 | 1 Ref      |
| HM753685 | Unassigned | Unassigned | Unassigned | 310_0   | Clustered           | 155 VC_310_0 | 155 | 0.9979 | 1          | 0.9979 | 0 | 0 | 0 | 1 Ref      |
| HM753686 | Unassigned | Unassigned | Unassigned | 310_0   | Clustered           | 155 VC_310_0 | 155 | 0.9979 | 1          | 0.9979 | 0 | 0 | 0 | 1 Ref      |
| HM753687 | Unassigned | Unassigned | Unassigned | 310_0   | Clustered           | 155 VC_310_0 | 155 | 0.9979 | 1          | 0.9979 | 0 | 0 | 0 | 1 Ref      |
| HM753688 | Unassigned | Unassigned | Unassigned | 310_0   | Clustered           | 155 VC_310_0 | 155 | 0.9979 | 1          | 0.9979 | 0 | 0 | 0 | 1 Ref      |
| HM753689 | Unassigned | Unassigned | Unassigned | 310_0   | Clustered           | 155 VC_310_0 | 155 | 0.9979 | 1          | 0.9979 | 0 | 0 | 0 | 1 Ref      |
| HM753690 | Unassigned | Unassigned | Unassigned | 310_0   | Clustered           | 155 VC_310_0 | 155 | 0.9979 | 1          | 0.9979 | 0 | 0 | 0 | 1 Ref      |
| HM753691 | Unassigned | Unassigned | Unassigned | 310_0   | Clustered           | 155 VC_310_0 | 155 | 0.9979 | 1          | 0.9979 | 0 | 0 | 0 | 1 Ref      |
| HM753692 | Unassigned | Unassigned | Unassigned | 310_0   | Clustered           | 155 VC_310_0 | 155 | 0.9979 | 1          | 0.9979 | 0 | 0 | 0 | 1 Ref      |
| HM753693 | Unassigned | Unassigned | Unassigned | 310_0   | Clustered           | 155 VC_310_0 | 155 | 0.9979 | 1          | 0.9979 | 0 | 0 | 0 | 1 Ref      |
| HM753694 | Unassigned | Unassigned | Unassigned | 310_0   | Clustered           | 155 VC_310_0 | 155 | 0.9979 | 1          | 0.9979 | 0 | 0 | 0 | 1 Ref      |
| HM753695 | Unassigned | Unassigned | Unassigned | 310_0   | Clustered           | 155 VC_310_0 | 155 | 0.9979 | 1          | 0.9979 | 0 | 0 | 0 | 1 Ref      |



|           |            |            |            |        |                     |              |     |        |            |        |   |   |   |            |
|-----------|------------|------------|------------|--------|---------------------|--------------|-----|--------|------------|--------|---|---|---|------------|
| HM753696  | Unassigned | Unassigned | Unassigned | 310_0  | Clustered           | 155 VC_310_0 | 155 | 0.9979 | 1          | 0.9979 | 0 | 0 | 0 | 1 Ref      |
| HM753697  | Unassigned | Unassigned | Unassigned | 310_0  | Clustered           | 155 VC_310_0 | 155 | 0.9979 | 1          | 0.9979 | 0 | 0 | 0 | 1 Ref      |
| HM753698  | Unassigned | Unassigned | Unassigned | 310_0  | Clustered           | 155 VC_310_0 | 155 | 0.9979 | 1          | 0.9979 | 0 | 0 | 0 | 1 Ref      |
| HM753699  | Unassigned | Unassigned | Unassigned | 310_0  | Clustered           | 155 VC_310_0 | 155 | 0.9979 | 1          | 0.9979 | 0 | 0 | 0 | 1 Ref      |
| HM753700  | Unassigned | Unassigned | Unassigned | 310_0  | Clustered           | 155 VC_310_0 | 155 | 0.9979 | 1          | 0.9979 | 0 | 0 | 0 | 1 Ref      |
| HM753701  | Unassigned | Unassigned | Unassigned | 310_0  | Clustered           | 155 VC_310_0 | 155 | 0.9979 | 1          | 0.9979 | 0 | 0 | 0 | 1 Ref      |
| HM753702  | Unassigned | Unassigned | Unassigned | 310_0  | Clustered           | 155 VC_310_0 | 155 | 0.9979 | 1          | 0.9979 | 0 | 0 | 0 | 1 Ref      |
| HM753703  | Unassigned | Unassigned | Unassigned | 310_0  | Clustered           | 155 VC_310_0 | 155 | 0.9979 | 1          | 0.9979 | 0 | 0 | 0 | 1 Ref      |
| HM753704  | Unassigned | Unassigned | Unassigned | 310_0  | Clustered           | 155 VC_310_0 | 155 | 0.9979 | 1          | 0.9979 | 0 | 0 | 0 | 1 Ref      |
| HM753705  | Unassigned | Unassigned | Unassigned | 310_0  | Clustered           | 155 VC_310_0 | 155 | 0.9979 | 1          | 0.9979 | 0 | 0 | 0 | 1 Ref      |
| HM753706  | Unassigned | Unassigned | Unassigned | 310_0  | Clustered           | 155 VC_310_0 | 155 | 0.9979 | 1          | 0.9979 | 0 | 0 | 0 | 1 Ref      |
| HM753707  | Unassigned | Unassigned | Unassigned | 310_0  | Clustered           | 155 VC_310_0 | 155 | 0.9979 | 1          | 0.9979 | 0 | 0 | 0 | 1 Ref      |
| HM753708  | Unassigned | Unassigned | Unassigned | 310_0  | Clustered           | 155 VC_310_0 | 155 | 0.9979 | 1          | 0.9979 | 0 | 0 | 0 | 1 Ref      |
| HM753709  | Unassigned | Unassigned | Unassigned | 310_0  | Clustered           | 155 VC_310_0 | 155 | 0.9979 | 1          | 0.9979 | 0 | 0 | 0 | 1 Ref      |
| HM753710  | Unassigned | Unassigned | Unassigned | 310_0  | Clustered           | 155 VC_310_0 | 155 | 0.9979 | 1          | 0.9979 | 0 | 0 | 0 | 1 Ref      |
| HM753711  | Unassigned | Unassigned | Unassigned | 310_0  | Clustered           | 155 VC_310_0 | 155 | 0.9979 | 1          | 0.9979 | 0 | 0 | 0 | 1 Ref      |
| HM753712  | Unassigned | Unassigned | Unassigned | 310_0  | Clustered           | 155 VC_310_0 | 155 | 0.9979 | 1          | 0.9979 | 0 | 0 | 0 | 1 Ref      |
| HM753713  | Unassigned | Unassigned | Unassigned | 310_0  | Clustered           | 155 VC_310_0 | 155 | 0.9979 | 1          | 0.9979 | 0 | 0 | 0 | 1 Ref      |
| HM753714  | Unassigned | Unassigned | Unassigned | 310_0  | Clustered           | 155 VC_310_0 | 155 | 0.9979 | 1          | 0.9979 | 0 | 0 | 0 | 1 Ref      |
| HM753715  | Unassigned | Unassigned | Unassigned | 310_0  | Clustered           | 155 VC_310_0 | 155 | 0.9979 | 1          | 0.9979 | 0 | 0 | 0 | 1 Ref      |
| HM753716  | Unassigned | Unassigned | Unassigned | 310_0  | Clustered           | 155 VC_310_0 | 155 | 0.9979 | 1          | 0.9979 | 0 | 0 | 0 | 1 Ref      |
| HM753717  | Unassigned | Unassigned | Unassigned | 310_0  | Clustered           | 155 VC_310_0 | 155 | 0.9979 | 1          | 0.9979 | 0 | 0 | 0 | 1 Ref      |
| HM753718  | Unassigned | Unassigned | Unassigned | 310_0  | Clustered           | 155 VC_310_0 | 155 | 0.9979 | 1          | 0.9979 | 0 | 0 | 0 | 1 Ref      |
| HM755814  | Unassigned | Unassigned | Unassigned | 532_0  | Clustered           | 75 VC_532_0  | 75  | 0.9393 | 1          | 0.9393 | 0 | 0 | 0 | 1 Ref      |
| HM770079  | Unassigned | Unassigned | Unassigned | 6_0    | Clustered           | 44 VC_6_0    | 44  | 0.9068 | 1          | 0.9068 | 0 | 0 | 0 | 1 Ref      |
| HM775306  | Unassigned | Unassigned | Unassigned | 310_0  | Clustered           | 155 VC_310_0 | 155 | 0.9979 | 1          | 0.9979 | 0 | 0 | 0 | 1 Ref      |
| HM775307  | Unassigned | Unassigned | Unassigned | 310_0  | Clustered           | 155 VC_310_0 | 155 | 0.9979 | 1          | 0.9979 | 0 | 0 | 0 | 1 Ref      |
| HM775308  | Unassigned | Unassigned | Unassigned | 310_0  | Clustered           | 155 VC_310_0 | 155 | 0.9979 | 1          | 0.9979 | 0 | 0 | 0 | 1 Ref      |
| HM775309  | Unassigned | Unassigned | Unassigned | 310_0  | Clustered           | 155 VC_310_0 | 155 | 0.9979 | 1          | 0.9979 | 0 | 0 | 0 | 1 Ref      |
| HM775310  | Unassigned | Unassigned | Unassigned | 310_0  | Clustered           | 155 VC_310_0 | 155 | 0.9979 | 1          | 0.9979 | 0 | 0 | 0 | 1 Ref      |
| HM775311  | Unassigned | Unassigned | Unassigned | 310_0  | Clustered           | 155 VC_310_0 | 155 | 0.9979 | 1          | 0.9979 | 0 | 0 | 0 | 1 Ref      |
| HM997019  | Unassigned | Unassigned | Unassigned | 836_0  | Clustered           | 3 VC_836_0   | 3   | 0.1157 | 0.99842379 | 0.1155 | 0 | 0 | 0 | 1 Ref      |
| HM997020  | Unassigned | Unassigned | Unassigned | 290_2  | Clustered           | 2 VC_290_2   | 2   | 0.0027 | 0.93842619 | 0.0025 | 0 | 0 | 0 | 1 Ref      |
| HQ1 10083 | Unassigned | Unassigned | Unassigned | 5_0    | Clustered           | 27 VC_5_0    | 27  | 0.9599 | 1          | 0.9599 | 0 | 0 | 0 | 1 Ref      |
| HQ1 10084 | Unassigned | Unassigned | Unassigned | 235_0  | Clustered           | 60 VC_235_0  | 60  | 0.9413 | 1          | 0.9413 | 0 | 0 | 0 | 1 Ref      |
| HQ1 27381 | Unassigned | Unassigned | Unassigned | 9_0    | Clustered           | 38 VC_9_0    | 38  | 0.4859 | 1          | 0.4859 | 0 | 0 | 0 | 1 Ref      |
| HQ1 41410 | Unassigned | Unassigned | Unassigned | 280_0  | Clustered           | 4 VC_280_0   | 4   | 0.3169 | 0.99994916 | 0.3169 | 0 | 0 | 0 | 0.8333 Ref |
| HQ1 41411 | Unassigned | Unassigned | Unassigned | 307_0  | Clustered           | 2 VC_307_0   | 2   | 0.1267 | 0.95445632 | 0.1209 | 0 | 0 | 0 | 1 Ref      |
| HQ1 63896 | Unassigned | Unassigned | Unassigned | 155_8  | Clustered           | 66 VC_155_8  | 66  | 0.4537 | 1          | 0.4537 | 0 | 0 | 0 | 0.8182 Ref |
| HQ1 86308 | Unassigned | Unassigned | Unassigned | 714_0  | Clustered           | 71 VC_714_0  | 71  | 0.935  | 1          | 0.935  | 0 | 0 | 0 | 1 Ref      |
| HQ201307  | Unassigned | Unassigned | Unassigned | 36_0   | Clustered           | 4 VC_36_0    | 4   | 0.0597 | 0.99994573 | 0.0597 | 0 | 0 | 0 | 1 Ref      |
| HQ201308  | Unassigned | Unassigned | Unassigned | 33_2   | Clustered/Singleton | 1 VC_33_2    | 1   | 0      | 1          | 0      | 0 | 0 | 0 | 1 Ref      |
| HQ224500  | Unassigned | Unassigned | Unassigned | 904_0  | Clustered           | 10 VC_904_0  | 10  | 0.9878 | 0.99948433 | 0.9873 | 0 | 0 | 0 | 1 Ref      |
| HQ259103  | Unassigned | Unassigned | Unassigned | 135_31 | Clustered           | 6 VC_135_31  | 6   | 0.0262 | 0.99999636 | 0.0262 | 0 | 0 | 0 | 1 Ref      |
| HQ259105  | Unassigned | Unassigned | Unassigned | 801_0  | Clustered           | 37 VC_801_0  | 37  | 0.5672 | 1          | 0.5672 | 0 | 0 | 0 | 1 Ref      |
| HQ3 16579 | Unassigned | Unassigned | Unassigned | 511_14 | Clustered/Singleton | 1 VC_511_14  | 1   | 0      | 1          | 0      | 0 | 0 | 0 | 1 Ref      |
| HQ3 16581 | Unassigned | Unassigned | Unassigned | 255_0  | Clustered           | 11 VC_255_0  | 11  | 0.7034 | 1          | 0.7034 | 0 | 0 | 0 | 1 Ref      |
| HQ3 16582 | Unassigned | Unassigned | Unassigned | 933_0  | Clustered           | 3 VC_933_0   | 3   | 0.9964 | 0.94670842 | 0.9433 | 0 | 0 | 0 | 1 Ref      |
| HQ3 16583 | Unassigned | Unassigned | Unassigned | 675_0  | Clustered           | 2 VC_675_0   | 2   | 0.0088 | 0.92265122 | 0.0082 | 0 | 0 | 0 | 1 Ref      |
| HQ3 16584 | Unassigned | Unassigned | Unassigned | 352_0  | Clustered           | 31 VC_352_0  | 31  | 0.9547 | 1          | 0.9547 | 0 | 0 | 0 | 1 Ref      |
| HQ3 16603 | Unassigned | Unassigned | Unassigned | 675_0  | Clustered           | 2 VC_675_0   | 2   | 0.0088 | 0.92265122 | 0.0082 | 0 | 0 | 0 | 1 Ref      |
| HQ3 16604 | Unassigned | Unassigned | Unassigned | 935_1  | Clustered           | 4 VC_935_1   | 4   | 0.1471 | 0.99997723 | 0.1471 | 0 | 0 | 0 | 1 Ref      |
| HQ3 17290 | Unassigned | Unassigned | Unassigned | 681_0  | Clustered           | 62 VC_681_0  | 62  | 0.693  | 1          | 0.693  | 0 | 0 | 0 | 1 Ref      |
| HQ3 17291 | Unassigned | Unassigned | Unassigned | 681_0  | Clustered           | 62 VC_681_0  | 62  | 0.693  | 1          | 0.693  | 0 | 0 | 0 | 1 Ref      |
| HQ3 17292 | Unassigned | Unassigned | Unassigned | 681_0  | Clustered           | 62 VC_681_0  | 62  | 0.693  | 1          | 0.693  | 0 | 0 | 0 | 1 Ref      |
| HQ3 17384 | Unassigned | Unassigned | Unassigned | 938_0  | Clustered           | 3 VC_938_0   | 3   | 0.6623 | 0.99633114 | 0.6599 | 0 | 0 | 0 | 1 Ref      |
| HQ3 17386 | Unassigned | Unassigned | Unassigned | 941_0  | Clustered           | 5 VC_941_0   | 5   | 0.7412 | 0.99999276 | 0.7412 | 0 | 0 | 0 | 1 Ref      |
| HQ3 17387 | Unassigned | Unassigned | Unassigned | 857_0  | Clustered           | 16 VC_857_0  | 16  | 0.9317 | 1          | 0.9317 | 0 | 0 | 0 | 1 Ref      |
| HQ3 17388 | Unassigned | Unassigned | Unassigned | 352_0  | Clustered           | 31 VC_352_0  | 31  | 0.9547 | 1          | 0.9547 | 0 | 0 | 0 | 1 Ref      |
| HQ3 17389 | Unassigned | Unassigned | Unassigned | 352_0  | Clustered           | 31 VC_352_0  | 31  | 0.9547 | 1          | 0.9547 | 0 | 0 | 0 | 1 Ref      |
| HQ3 17390 | Unassigned | Unassigned | Unassigned | 942_0  | Clustered           | 2 VC_942_0   | 2   | 0.9873 | 0.5        | 0.4937 | 0 | 0 | 0 | 1 Ref      |
| HQ3 17391 | Unassigned | Unassigned | Unassigned | 446_10 | Clustered           | 2 VC_446_10  | 2   | 0.0211 | 0.95772926 | 0.0202 | 0 | 0 | 0 | 1 Ref      |
| HQ3 17392 | Unassigned | Unassigned | Unassigned | 943_0  | Clustered           | 6 VC_943_0   | 6   | 0.277  | 1          | 0.277  | 0 | 0 | 0 | 1 Ref      |
| HQ3 17393 | Unassigned | Unassigned | Unassigned | 549_2  | Clustered/Singleton | 1 VC_549_2   | 1   | 0      | 1          | 0      | 0 | 0 | 0 | 1 Ref      |
| HQ332136  | Unassigned | Unassigned | Unassigned | 945_0  | Clustered           | 2 VC_945_0   | 2   | 0.0994 | 0.83429703 | 0.0829 | 0 | 0 | 0 | 1 Ref      |
| HQ332137  | Unassigned | Unassigned | Unassigned | 352_0  | Clustered           | 31 VC_352_0  | 31  | 0.9547 | 1          | 0.9547 | 0 | 0 | 0 | 1 Ref      |
| HQ332138  | Unassigned | Unassigned | Unassigned | 349_0  | Clustered           | 5 VC_349_0   | 5   | 0.191  | 0.97099341 | 0.1855 | 0 | 0 | 0 | 1 Ref      |
| HQ332140  | Unassigned | Unassigned | Unassigned | 352_0  | Clustered           | 31 VC_352_0  | 31  | 0.9547 | 1          | 0.9547 | 0 | 0 | 0 | 1 Ref      |
| HQ332141  | Unassigned | Unassigned | Unassigned | 363_0  | Clustered           | 3 VC_363_0   | 3   | 0.8866 | 0.98155579 | 0.8702 | 0 | 0 | 0 | 1 Ref      |
| HQ332142  | Unassigned | Unassigned | Unassigned | 938_0  | Clustered           | 3 VC_938_0   | 3   | 0.6623 | 0.99633114 | 0.6599 | 0 | 0 | 0 | 1 Ref      |
| HQ333270  | Unassigned | Unassigned | Unassigned | 399_0  | Clustered           | 49 VC_399_0  | 49  | 0.7927 | 1          | 0.7927 | 0 | 0 | 0 | 1 Ref      |
| HQ337021  | Unassigned | Unassigned | Unassigned | 674_2  | Clustered           | 3 VC_674_2   | 3   | 0.0227 | 0.99860756 | 0.0227 | 0 | 0 | 0 | 1 Ref      |
| HQ337022  | Unassigned | Unassigned | Unassigned | 352_0  | Clustered           | 31 VC_352_0  | 31  | 0.9547 | 1          | 0.9547 | 0 | 0 | 0 | 1 Ref      |
| HQ377372  | Unassigned | Unassigned | Unassigned | 745_0  | Clustered           | 9 VC_745_0   | 9   | 0.9955 | 0.99999771 | 0.9955 | 0 | 0 | 0 | 1 Ref      |
| HQ377373  | Unassigned | Unassigned | Unassigned | 745_0  | Clustered           | 9 VC_745_0   | 9   | 0.9955 | 0.99999771 | 0.9955 | 0 | 0 | 0 | 1 Ref      |
| HQ396194  | Unassigned | Unassigned | Unassigned | 947_0  | Clustered           | 4 VC_947_0   | 4   | 0.8344 | 0.99992411 | 0.8343 | 0 | 0 | 0 | 1 Ref      |
| HQ403646  | Unassigned | Unassigned | Unassigned | 952_0  | Clustered           | 39 VC_952_0  | 39  | 0.9064 | 1          | 0.9064 | 0 | 0 | 0 | 1 Ref      |
| HQ406778  | Unassigned | Unassigned | Unassigned | 198_23 | Clustered           | 10 VC_198_23 | 10  | 0.0697 | 1          | 0.0697 | 0 | 0 | 0 | 0.8444 Ref |
| HQ424691  | Unassigned | Unassigned | Unassigned | 44_0   | Clustered           | 49 VC_44_0   | 49  | 0.4506 | 1          | 0.4506 | 0 | 0 | 0 | 0.8605 Ref |
| HQ630627  | Unassigned | Unassigned | Unassigned | 356_6  | Clustered/Singleton | 1 VC_356_6   | 1   | 0      | 1          | 0      | 0 | 0 | 0 | 1 Ref      |
| HQ632825  | Unassigned | Unassigned | Unassigned | 446_9  | Clustered           | 3 VC_446_9   | 3   | 0.0365 | 0.99848173 | 0.0364 | 0 | 0 | 0 | 1 Ref      |



|          |            |            |            |        |                     |              |    |        |            |        |   |   |   |            |
|----------|------------|------------|------------|--------|---------------------|--------------|----|--------|------------|--------|---|---|---|------------|
| HQ632857 | Unassigned | Unassigned | Unassigned | 954_0  | Clustered           | 2 VC_954_0   | 2  | 0.947  | 0.72985431 | 0.6911 | 0 | 0 | 0 | 1 Ref      |
| HQ632858 | Unassigned | Unassigned | Unassigned | 954_0  | Clustered           | 2 VC_954_0   | 2  | 0.947  | 0.72985431 | 0.6911 | 0 | 0 | 0 | 1 Ref      |
| HQ632859 | Unassigned | Unassigned | Unassigned | 614_0  | Clustered           | 4 VC_614_0   | 4  | 0.0588 | 0.99274182 | 0.0584 | 0 | 0 | 0 | 1 Ref      |
| HQ632860 | Unassigned | Unassigned | Unassigned | 661_0  | Clustered           | 7 VC_661_0   | 7  | 0.15   | 1          | 0.15   | 0 | 0 | 0 | 0.7619 Ref |
| HQ633062 | Unassigned | Unassigned | Unassigned | 352_0  | Clustered           | 31 VC_352_0  | 31 | 0.9547 | 1          | 0.9547 | 0 | 0 | 0 | 1 Ref      |
| HQ633071 | Unassigned | Unassigned | Unassigned | 446_11 | Clustered/Singleton | 1 VC_446_11  | 1  | 0      | 1          | 0      | 0 | 0 | 0 | 1 Ref      |
| HQ634152 | Unassigned | Unassigned | Unassigned | 352_0  | Clustered           | 31 VC_352_0  | 31 | 0.9547 | 1          | 0.9547 | 0 | 0 | 0 | 1 Ref      |
| HQ634156 | Unassigned | Unassigned | Unassigned | 511_10 | Clustered/Singleton | 1 VC_511_10  | 1  | 0      | 1          | 0      | 0 | 0 | 0 | 1 Ref      |
| HQ634157 | Unassigned | Unassigned | Unassigned | 511_7  | Clustered/Singleton | 1 VC_511_7   | 1  | 0      | 1          | 0      | 0 | 0 | 0 | 1 Ref      |
| HQ634175 | Unassigned | Unassigned | Unassigned | 674_3  | Clustered/Singleton | 1 VC_674_3   | 1  | 0      | 1          | 0      | 0 | 0 | 0 | 1 Ref      |
| HQ634176 | Unassigned | Unassigned | Unassigned | 674_2  | Clustered           | 3 VC_674_2   | 3  | 0.0227 | 0.99860756 | 0.0227 | 0 | 0 | 0 | 1 Ref      |
| HQ634177 | Unassigned | Unassigned | Unassigned | 447_0  | Clustered           | 6 VC_447_0   | 6  | 0.0775 | 1          | 0.0775 | 0 | 0 | 0 | 1 Ref      |
| HQ634187 | Unassigned | Unassigned | Unassigned | 369_0  | Clustered           | 2 VC_369_0   | 2  | 0.1984 | 0.93211095 | 0.185  | 0 | 0 | 0 | 1 Ref      |
| HQ634188 | Unassigned | Unassigned | Unassigned | 352_0  | Clustered           | 31 VC_352_0  | 31 | 0.9547 | 1          | 0.9547 | 0 | 0 | 0 | 1 Ref      |
| HQ634189 | Unassigned | Unassigned | Unassigned | 674_7  | Clustered           | 3 VC_674_7   | 3  | 0.0163 | 0.99856944 | 0.0163 | 0 | 0 | 0 | 1 Ref      |
| HQ634190 | Unassigned | Unassigned | Unassigned | 674_6  | Clustered           | 2 VC_674_6   | 2  | 0.0077 | 0.9577529  | 0.0074 | 0 | 0 | 0 | 1 Ref      |
| HQ634192 | Unassigned | Unassigned | Unassigned | 962_0  | Clustered           | 4 VC_962_0   | 4  | 0.7703 | 0.999902   | 0.7702 | 0 | 0 | 0 | 1 Ref      |
| HQ634194 | Unassigned | Unassigned | Unassigned | 809_1  | Clustered           | 3 VC_809_1   | 3  | 0.1672 | 0.99842878 | 0.1669 | 0 | 0 | 0 | 1 Ref      |
| HQ634195 | Unassigned | Unassigned | Unassigned | 511_15 | Clustered/Singleton | 1 VC_511_15  | 1  | 0      | 1          | 0      | 0 | 0 | 0 | 1 Ref      |
| HQ634196 | Unassigned | Unassigned | Unassigned | 809_1  | Clustered           | 3 VC_809_1   | 3  | 0.1672 | 0.99842878 | 0.1669 | 0 | 0 | 0 | 1 Ref      |
| HQ641340 | Unassigned | Unassigned | Unassigned | 83_0   | Clustered           | 24 VC_83_0   | 24 | 0.7345 | 1          | 0.7345 | 0 | 0 | 0 | 1 Ref      |
| HQ641341 | Unassigned | Unassigned | Unassigned | 83_0   | Clustered           | 24 VC_83_0   | 24 | 0.7345 | 1          | 0.7345 | 0 | 0 | 0 | 1 Ref      |
| HQ641342 | Unassigned | Unassigned | Unassigned | 83_0   | Clustered           | 24 VC_83_0   | 24 | 0.7345 | 1          | 0.7345 | 0 | 0 | 0 | 1 Ref      |
| HQ641343 | Unassigned | Unassigned | Unassigned | 83_0   | Clustered           | 24 VC_83_0   | 24 | 0.7345 | 1          | 0.7345 | 0 | 0 | 0 | 1 Ref      |
| HQ641344 | Unassigned | Unassigned | Unassigned | 83_0   | Clustered           | 24 VC_83_0   | 24 | 0.7345 | 1          | 0.7345 | 0 | 0 | 0 | 1 Ref      |
| HQ641345 | Unassigned | Unassigned | Unassigned | 771_0  | Clustered           | 8 VC_771_0   | 8  | 0.7491 | 1          | 0.7491 | 0 | 0 | 0 | 1 Ref      |
| HQ641346 | Unassigned | Unassigned | Unassigned | 771_0  | Clustered           | 8 VC_771_0   | 8  | 0.7491 | 1          | 0.7491 | 0 | 0 | 0 | 1 Ref      |
| HQ641347 | Unassigned | Unassigned | Unassigned | 513_1  | Clustered           | 41 VC_513_1  | 41 | 0.3276 | 1          | 0.3276 | 0 | 0 | 0 | 0.911 Ref  |
| HQ641348 | Unassigned | Unassigned | Unassigned | 513_1  | Clustered           | 41 VC_513_1  | 41 | 0.3276 | 1          | 0.3276 | 0 | 0 | 0 | 0.911 Ref  |
| HQ641349 | Unassigned | Unassigned | Unassigned | 513_1  | Clustered           | 41 VC_513_1  | 41 | 0.3276 | 1          | 0.3276 | 0 | 0 | 0 | 0.911 Ref  |
| HQ641350 | Unassigned | Unassigned | Unassigned | 513_1  | Clustered           | 41 VC_513_1  | 41 | 0.3276 | 1          | 0.3276 | 0 | 0 | 0 | 0.911 Ref  |
| HQ641351 | Unassigned | Unassigned | Unassigned | 513_1  | Clustered           | 41 VC_513_1  | 41 | 0.3276 | 1          | 0.3276 | 0 | 0 | 0 | 0.911 Ref  |
| HQ641352 | Unassigned | Unassigned | Unassigned | 513_1  | Clustered           | 41 VC_513_1  | 41 | 0.3276 | 1          | 0.3276 | 0 | 0 | 0 | 0.911 Ref  |
| HQ641353 | Unassigned | Unassigned | Unassigned | 513_1  | Clustered           | 41 VC_513_1  | 41 | 0.3276 | 1          | 0.3276 | 0 | 0 | 0 | 0.911 Ref  |
| HQ641354 | Unassigned | Unassigned | Unassigned | 513_1  | Clustered           | 41 VC_513_1  | 41 | 0.3276 | 1          | 0.3276 | 0 | 0 | 0 | 0.911 Ref  |
| HQ650011 | Unassigned | Unassigned | Unassigned | 198_24 | Clustered           | 5 VC_198_24  | 5  | 0.029  | 0.9999995  | 0.029  | 0 | 0 | 0 | 0.7 Ref    |
| HQ683709 | Unassigned | Unassigned | Unassigned | 965_0  | Clustered           | 2 VC_965_0   | 2  | 0.4025 | 0.89435023 | 0.36   | 0 | 0 | 0 | 1 Ref      |
| HQ698895 | Unassigned | Unassigned | Unassigned | 960_0  | Clustered           | 2 VC_960_0   | 2  | 0.086  | 0.75688284 | 0.0651 | 0 | 0 | 0 | 1 Ref      |
| HQ698922 | Unassigned | Unassigned | Unassigned | 510_0  | Clustered           | 2 VC_510_0   | 2  | 0.0158 | 0.67065552 | 0.0106 | 0 | 0 | 0 | 1 Ref      |
| HQ711984 | Unassigned | Unassigned | Unassigned | 304_1  | Clustered           | 20 VC_304_1  | 20 | 0.5632 | 1          | 0.5632 | 0 | 0 | 0 | 0.7684 Ref |
| HQ711985 | Unassigned | Unassigned | Unassigned | 182_0  | Clustered           | 2 VC_182_0   | 2  | 0.0495 | 0.95664605 | 0.0473 | 0 | 0 | 0 | 1 Ref      |
| HQ728263 | Unassigned | Unassigned | Unassigned | 339_0  | Clustered           | 11 VC_339_0  | 11 | 0.4647 | 1          | 0.4647 | 0 | 0 | 0 | 1 Ref      |
| HQ728264 | Unassigned | Unassigned | Unassigned | 816_0  | Clustered           | 35 VC_816_0  | 35 | 0.9824 | 1          | 0.9824 | 0 | 0 | 0 | 1 Ref      |
| HQ728265 | Unassigned | Unassigned | Unassigned | 400_0  | Clustered           | 3 VC_400_0   | 3  | 0.0419 | 0.99861633 | 0.0418 | 0 | 0 | 0 | 1 Ref      |
| HQ728524 | Unassigned | Unassigned | Unassigned | 538_26 | Clustered           | 3 VC_538_26  | 3  | 0.0258 | 0.99859898 | 0.0258 | 0 | 0 | 0 | 1 Ref      |
| HQ829472 | Unassigned | Unassigned | Unassigned | 297_5  | Clustered           | 14 VC_297_5  | 14 | 0.141  | 1          | 0.141  | 0 | 0 | 0 | 0.9231 Ref |
| HQ832595 | Unassigned | Unassigned | Unassigned | 77_0   | Clustered           | 37 VC_77_0   | 37 | 0.9392 | 1          | 0.9392 | 0 | 0 | 0 | 1 Ref      |
| HQ906662 | Unassigned | Unassigned | Unassigned | 23_0   | Clustered           | 11 VC_23_0   | 11 | 0.5144 | 1          | 0.5144 | 0 | 0 | 0 | 1 Ref      |
| HQ906663 | Unassigned | Unassigned | Unassigned | 23_0   | Clustered           | 11 VC_23_0   | 11 | 0.5144 | 1          | 0.5144 | 0 | 0 | 0 | 1 Ref      |
| HQ906664 | Unassigned | Unassigned | Unassigned | 23_0   | Clustered           | 11 VC_23_0   | 11 | 0.5144 | 1          | 0.5144 | 0 | 0 | 0 | 1 Ref      |
| HQ918180 | Unassigned | Unassigned | Unassigned | 686_0  | Clustered           | 25 VC_686_0  | 25 | 0.5501 | 1          | 0.5501 | 0 | 0 | 0 | 0.96 Ref   |
| JF344709 | Unassigned | Unassigned | Unassigned | 967_0  | Clustered           | 5 VC_967_0   | 5  | 0.992  | 0.97937098 | 0.9715 | 0 | 0 | 0 | 1 Ref      |
| JF412296 | Unassigned | Unassigned | Unassigned | 633_0  | Clustered           | 2 VC_633_0   | 2  | 0.0354 | 0.89435023 | 0.0317 | 0 | 0 | 0 | 1 Ref      |
| JF461087 | Unassigned | Unassigned | Unassigned | 340_1  | Clustered           | 17 VC_340_1  | 17 | 0.0863 | 1          | 0.0863 | 0 | 0 | 0 | 0.8235 Ref |
| JF501022 | Unassigned | Unassigned | Unassigned | 972_0  | Clustered           | 99 VC_972_0  | 99 | 0.9113 | 1          | 0.9113 | 0 | 0 | 0 | 0.9928 Ref |
| JF704091 | Unassigned | Unassigned | Unassigned | 384_18 | Clustered           | 10 VC_384_18 | 10 | 0.0301 | 1          | 0.0301 | 0 | 0 | 0 | 0.8 Ref    |
| JF704092 | Unassigned | Unassigned | Unassigned | 579_22 | Clustered           | 4 VC_579_22  | 4  | 0.0099 | 0.99020449 | 0.0098 | 0 | 0 | 0 | 0.8333 Ref |
| JF704093 | Unassigned | Unassigned | Unassigned | 535_0  | Clustered           | 18 VC_535_0  | 18 | 0.1595 | 1          | 0.1595 | 0 | 0 | 0 | 1 Ref      |
| JF704094 | Unassigned | Unassigned | Unassigned | 385_0  | Clustered           | 24 VC_385_0  | 24 | 0.5516 | 1          | 0.5516 | 0 | 0 | 0 | 1 Ref      |
| JF704095 | Unassigned | Unassigned | Unassigned | 527_0  | Clustered           | 37 VC_527_0  | 37 | 0.9679 | 1          | 0.9679 | 0 | 0 | 0 | 1 Ref      |
| JF704096 | Unassigned | Unassigned | Unassigned | 579_20 | Clustered           | 17 VC_579_20 | 17 | 0.0538 | 1          | 0.0538 | 0 | 0 | 0 | 0.9926 Ref |
| JF704097 | Unassigned | Unassigned | Unassigned | 230_0  | Clustered           | 38 VC_230_0  | 38 | 0.9076 | 1          | 0.9076 | 0 | 0 | 0 | 1 Ref      |
| JF704098 | Unassigned | Unassigned | Unassigned | 532_0  | Clustered           | 75 VC_532_0  | 75 | 0.9393 | 1          | 0.9393 | 0 | 0 | 0 | 1 Ref      |
| JF704099 | Unassigned | Unassigned | Unassigned | 384_3  | Clustered           | 22 VC_384_3  | 22 | 0.0786 | 1          | 0.0786 | 0 | 0 | 0 | 0.9048 Ref |
| JF704100 | Unassigned | Unassigned | Unassigned | 973_0  | Clustered           | 15 VC_973_0  | 15 | 1      | 0          | 0      | 0 | 0 | 0 | 1 Ref      |
| JF704101 | Unassigned | Unassigned | Unassigned | 532_0  | Clustered           | 75 VC_532_0  | 75 | 0.9393 | 1          | 0.9393 | 0 | 0 | 0 | 1 Ref      |
| JF704102 | Unassigned | Unassigned | Unassigned | 384_16 | Clustered           | 42 VC_384_16 | 42 | 0.134  | 1          | 0.134  | 0 | 0 | 0 | 0.7282 Ref |
| JF704103 | Unassigned | Unassigned | Unassigned | 384_15 | Clustered           | 44 VC_384_15 | 44 | 0.139  | 1          | 0.139  | 0 | 0 | 0 | 0.7474 Ref |
| JF704104 | Unassigned | Unassigned | Unassigned | 385_0  | Clustered           | 24 VC_385_0  | 24 | 0.5516 | 1          | 0.5516 | 0 | 0 | 0 | 1 Ref      |
| JF704105 | Unassigned | Unassigned | Unassigned | 243_0  | Clustered           | 72 VC_243_0  | 72 | 0.8089 | 1          | 0.8089 | 0 | 0 | 0 | 1 Ref      |
| JF704106 | Unassigned | Unassigned | Unassigned | 243_0  | Clustered           | 72 VC_243_0  | 72 | 0.8089 | 1          | 0.8089 | 0 | 0 | 0 | 1 Ref      |
| JF704107 | Unassigned | Unassigned | Unassigned | 974_0  | Clustered           | 34 VC_974_0  | 34 | 0.7953 | 1          | 0.7953 | 0 | 0 | 0 | 1 Ref      |
| JF704109 | Unassigned | Unassigned | Unassigned | 384_15 | Clustered           | 44 VC_384_15 | 44 | 0.139  | 1          | 0.139  | 0 | 0 | 0 | 0.7474 Ref |
| JF704110 | Unassigned | Unassigned | Unassigned | 232_0  | Clustered           | 32 VC_232_0  | 32 | 0.8471 | 1          | 0.8471 | 0 | 0 | 0 | 0.996 Ref  |
| JF704111 | Unassigned | Unassigned | Unassigned | 531_0  | Clustered           | 32 VC_531_0  | 32 | 0.6859 | 1          | 0.6859 | 0 | 0 | 0 | 1 Ref      |
| JF704112 | Unassigned | Unassigned | Unassigned | 588_0  | Clustered           | 8 VC_588_0   | 8  | 0.5695 | 1          | 0.5695 | 0 | 0 | 0 | 1 Ref      |
| JF704114 | Unassigned | Unassigned | Unassigned | 532_0  | Clustered           | 75 VC_532_0  | 75 | 0.9393 | 1          | 0.9393 | 0 | 0 | 0 | 1 Ref      |
| JF704116 | Unassigned | Unassigned | Unassigned | 579_6  | Clustered           | 2 VC_579_6   | 2  | 0.0032 | 0.72299343 | 0.0023 | 0 | 0 | 0 | 1 Ref      |
| JF704117 | Unassigned | Unassigned | Unassigned | 538_74 | Clustered           | 2 VC_538_74  | 2  | 0.0075 | 0.95760586 | 0.0072 | 0 | 0 | 0 | 1 Ref      |
| JF712866 | Unassigned | Unassigned | Unassigned | 627_0  | Clustered           | 16 VC_627_0  | 16 | 0.9168 | 1          | 0.9168 | 0 | 0 | 0 | 1 Ref      |
| JF713456 | Unassigned | Unassigned | Unassigned | 935_0  | Clustered           | 6 VC_935_0   | 6  | 0.2317 | 1          | 0.2317 | 0 | 0 | 0 | 1 Ref      |



|          |            |            |            |        |                     |              |     |        |            |        |   |   |   |            |
|----------|------------|------------|------------|--------|---------------------|--------------|-----|--------|------------|--------|---|---|---|------------|
| JF719726 | Unassigned | Unassigned | Unassigned | 310_0  | Clustered           | 155 VC_310_0 | 155 | 0.9979 | 1          | 0.9979 | 0 | 0 | 0 | 1 Ref      |
| JF719727 | Unassigned | Unassigned | Unassigned | 310_0  | Clustered           | 155 VC_310_0 | 155 | 0.9979 | 1          | 0.9979 | 0 | 0 | 0 | 1 Ref      |
| JF719728 | Unassigned | Unassigned | Unassigned | 310_0  | Clustered           | 155 VC_310_0 | 155 | 0.9979 | 1          | 0.9979 | 0 | 0 | 0 | 1 Ref      |
| JF719729 | Unassigned | Unassigned | Unassigned | 373_0  | Clustered           | 358 VC_373_0 | 358 | 0.9614 | 1          | 0.9614 | 0 | 0 | 0 | 1 Ref      |
| JF719730 | Unassigned | Unassigned | Unassigned | 373_0  | Clustered           | 358 VC_373_0 | 358 | 0.9614 | 1          | 0.9614 | 0 | 0 | 0 | 1 Ref      |
| JF719731 | Unassigned | Unassigned | Unassigned | 373_0  | Clustered           | 358 VC_373_0 | 358 | 0.9614 | 1          | 0.9614 | 0 | 0 | 0 | 1 Ref      |
| JF719732 | Unassigned | Unassigned | Unassigned | 62_0   | Clustered           | 12 VC_62_0   | 12  | 0.7624 | 1          | 0.7624 | 0 | 0 | 0 | 1 Ref      |
| JF719733 | Unassigned | Unassigned | Unassigned | 62_0   | Clustered           | 12 VC_62_0   | 12  | 0.7624 | 1          | 0.7624 | 0 | 0 | 0 | 1 Ref      |
| JF719734 | Unassigned | Unassigned | Unassigned | 62_0   | Clustered           | 12 VC_62_0   | 12  | 0.7624 | 1          | 0.7624 | 0 | 0 | 0 | 1 Ref      |
| JF731128 | Unassigned | Unassigned | Unassigned | 110_0  | Clustered           | 33 VC_110_0  | 33  | 0.9488 | 1          | 0.9488 | 0 | 0 | 0 | 1 Ref      |
| JF734911 | Unassigned | Unassigned | Unassigned | 101_0  | Clustered           | 32 VC_101_0  | 32  | 0.8826 | 1          | 0.8826 | 0 | 0 | 0 | 1 Ref      |
| JF744988 | Unassigned | Unassigned | Unassigned | 917_0  | Clustered           | 28 VC_917_0  | 28  | 0.5465 | 1          | 0.5465 | 0 | 0 | 0 | 1 Ref      |
| JF767208 | Unassigned | Unassigned | Unassigned | 839_0  | Clustered           | 8 VC_839_0   | 8   | 0.9889 | 1          | 0.9889 | 0 | 0 | 0 | 1 Ref      |
| JF767209 | Unassigned | Unassigned | Unassigned | 839_0  | Clustered           | 8 VC_839_0   | 8   | 0.9889 | 1          | 0.9889 | 0 | 0 | 0 | 1 Ref      |
| JF767210 | Unassigned | Unassigned | Unassigned | 839_0  | Clustered           | 8 VC_839_0   | 8   | 0.9889 | 1          | 0.9889 | 0 | 0 | 0 | 1 Ref      |
| JF770475 | Unassigned | Unassigned | Unassigned | 469_0  | Clustered           | 18 VC_469_0  | 18  | 0.4583 | 1          | 0.4583 | 0 | 0 | 0 | 1 Ref      |
| JF773396 | Unassigned | Unassigned | Unassigned | 745_0  | Clustered           | 9 VC_745_0   | 9   | 0.9955 | 0.99999771 | 0.9955 | 0 | 0 | 0 | 1 Ref      |
| JF792674 | Unassigned | Unassigned | Unassigned | 535_1  | Clustered           | 108 VC_535_1 | 108 | 0.8479 | 1          | 0.8479 | 0 | 0 | 0 | 0.9955 Ref |
| JF900176 | Unassigned | Unassigned | Unassigned | 30_1   | Clustered           | 53 VC_30_1   | 53  | 0.7151 | 1          | 0.7151 | 0 | 0 | 0 | 0.9325 Ref |
| JF917095 | Unassigned | Unassigned | Unassigned | 977_0  | Clustered           | 2 VC_977_0   | 2   | 1      | 1          | 1      | 0 | 0 | 0 | 1 Ref      |
| JF923796 | Unassigned | Unassigned | Unassigned | 789_0  | Clustered           | 34 VC_789_0  | 34  | 0.9167 | 1          | 0.9167 | 0 | 0 | 0 | 1 Ref      |
| JF923797 | Unassigned | Unassigned | Unassigned | 789_0  | Clustered           | 34 VC_789_0  | 34  | 0.9167 | 1          | 0.9167 | 0 | 0 | 0 | 1 Ref      |
| JF937090 | Unassigned | Unassigned | Unassigned | 566_7  | Clustered           | 4 VC_566_7   | 4   | 0.0409 | 0.99661604 | 0.0408 | 0 | 0 | 0 | 1 Ref      |
| JF937091 | Unassigned | Unassigned | Unassigned | 571_0  | Clustered           | 16 VC_571_0  | 16  | 0.091  | 1          | 0.091  | 0 | 0 | 0 | 0.6667 Ref |
| JF937092 | Unassigned | Unassigned | Unassigned | 230_0  | Clustered           | 38 VC_230_0  | 38  | 0.9076 | 1          | 0.9076 | 0 | 0 | 0 | 1 Ref      |
| JF937093 | Unassigned | Unassigned | Unassigned | 538_31 | Clustered           | 11 VC_538_31 | 11  | 0.0894 | 1          | 0.0894 | 0 | 0 | 0 | 0.6 Ref    |
| JF937094 | Unassigned | Unassigned | Unassigned | 230_0  | Clustered           | 38 VC_230_0  | 38  | 0.9076 | 1          | 0.9076 | 0 | 0 | 0 | 1 Ref      |
| JF937095 | Unassigned | Unassigned | Unassigned | 384_17 | Clustered           | 3 VC_384_17  | 3   | 0.0075 | 0.99812032 | 0.0075 | 0 | 0 | 0 | 1 Ref      |
| JF937096 | Unassigned | Unassigned | Unassigned | 571_2  | Clustered           | 17 VC_571_2  | 17  | 0.0965 | 1          | 0.0965 | 0 | 0 | 0 | 0.9779 Ref |
| JF937097 | Unassigned | Unassigned | Unassigned | 384_15 | Clustered           | 44 VC_384_15 | 44  | 0.139  | 1          | 0.139  | 0 | 0 | 0 | 0.7474 Ref |
| JF937098 | Unassigned | Unassigned | Unassigned | 538_93 | Clustered           | 2 VC_538_93  | 2   | 0.0103 | 0.95762079 | 0.0099 | 0 | 0 | 0 | 1 Ref      |
| JF937099 | Unassigned | Unassigned | Unassigned | 335_2  | Clustered/Singleton | 1 VC_335_2   | 1   | 0      | 1          | 0      | 0 | 0 | 0 | 1 Ref      |
| JF937100 | Unassigned | Unassigned | Unassigned | 335_36 | Clustered           | 2 VC_335_36  | 2   | 0.0036 | 0.94071129 | 0.0034 | 0 | 0 | 0 | 1 Ref      |
| JF937101 | Unassigned | Unassigned | Unassigned | 566_11 | Clustered/Singleton | 1 VC_566_11  | 1   | 0      | 1          | 0      | 0 | 0 | 0 | 1 Ref      |
| JF937102 | Unassigned | Unassigned | Unassigned | 538_37 | Clustered/Singleton | 1 VC_538_37  | 1   | 0      | 1          | 0      | 0 | 0 | 0 | 1 Ref      |
| JF937103 | Unassigned | Unassigned | Unassigned | 335_23 | Clustered           | 17 VC_335_23 | 17  | 0.0714 | 1          | 0.0714 | 0 | 0 | 0 | 0.6397 Ref |
| JF937104 | Unassigned | Unassigned | Unassigned | 244_1  | Clustered           | 13 VC_244_1  | 13  | 0.1766 | 1          | 0.1766 | 0 | 0 | 0 | 0.7308 Ref |
| JF937105 | Unassigned | Unassigned | Unassigned | 785_2  | Clustered           | 7 VC_785_2   | 7   | 0.2595 | 1          | 0.2595 | 0 | 0 | 0 | 1 Ref      |
| JF937106 | Unassigned | Unassigned | Unassigned | 571_0  | Clustered           | 16 VC_571_0  | 16  | 0.091  | 1          | 0.091  | 0 | 0 | 0 | 0.6667 Ref |
| JF937107 | Unassigned | Unassigned | Unassigned | 585_0  | Clustered           | 20 VC_585_0  | 20  | 0.8376 | 1          | 0.8376 | 0 | 0 | 0 | 1 Ref      |
| JF937108 | Unassigned | Unassigned | Unassigned | 335_5  | Clustered           | 11 VC_335_5  | 11  | 0.0469 | 1          | 0.0469 | 0 | 0 | 0 | 0.7636 Ref |
| JF937109 | Unassigned | Unassigned | Unassigned | 384_18 | Clustered           | 10 VC_384_18 | 10  | 0.0301 | 1          | 0.0301 | 0 | 0 | 0 | 0.8 Ref    |
| JF937110 | Unassigned | Unassigned | Unassigned | 335_5  | Clustered           | 11 VC_335_5  | 11  | 0.0469 | 1          | 0.0469 | 0 | 0 | 0 | 0.7636 Ref |
| JF939047 | Unassigned | Unassigned | Unassigned | 766_0  | Clustered           | 40 VC_766_0  | 40  | 0.7511 | 1          | 0.7511 | 0 | 0 | 0 | 1 Ref      |
| JF946695 | Unassigned | Unassigned | Unassigned | 222_2  | Clustered           | 5 VC_222_2   | 5   | 0.0569 | 0.99999997 | 0.0569 | 0 | 0 | 0 | 1 Ref      |
| JF957056 | Unassigned | Unassigned | Unassigned | 384_15 | Clustered           | 44 VC_384_15 | 44  | 0.139  | 1          | 0.139  | 0 | 0 | 0 | 0.7474 Ref |
| JF957057 | Unassigned | Unassigned | Unassigned | 335_24 | Clustered           | 3 VC_335_24  | 3   | 0.009  | 0.99853949 | 0.0089 | 0 | 0 | 0 | 1 Ref      |
| JF957058 | Unassigned | Unassigned | Unassigned | 531_0  | Clustered           | 32 VC_531_0  | 32  | 0.6859 | 1          | 0.6859 | 0 | 0 | 0 | 1 Ref      |
| JF957059 | Unassigned | Unassigned | Unassigned | 566_7  | Clustered           | 4 VC_566_7   | 4   | 0.0409 | 0.99661604 | 0.0408 | 0 | 0 | 0 | 1 Ref      |
| JF957060 | Unassigned | Unassigned | Unassigned | 226_0  | Clustered           | 5 VC_226_0   | 5   | 0.0793 | 0.99999998 | 0.0793 | 0 | 0 | 0 | 1 Ref      |
| JF966203 | Unassigned | Unassigned | Unassigned | 912_0  | Clustered           | 10 VC_912_0  | 10  | 0.1994 | 1          | 0.1994 | 0 | 0 | 0 | 1 Ref      |
| JF974286 | Unassigned | Unassigned | Unassigned | 961_0  | Clustered           | 3 VC_961_0   | 3   | 0.783  | 0.9944138  | 0.7786 | 0 | 0 | 0 | 1 Ref      |
| JF974287 | Unassigned | Unassigned | Unassigned | 662_0  | Clustered           | 2 VC_662_0   | 2   | 0.1082 | 0.95085347 | 0.1029 | 0 | 0 | 0 | 1 Ref      |
| JF974294 | Unassigned | Unassigned | Unassigned | 474_0  | Clustered           | 19 VC_474_0  | 19  | 0.3729 | 1          | 0.3729 | 0 | 0 | 0 | 1 Ref      |
| JF974296 | Unassigned | Unassigned | Unassigned | 809_1  | Clustered           | 3 VC_809_1   | 3   | 0.1672 | 0.99842878 | 0.1669 | 0 | 0 | 0 | 1 Ref      |
| JF974307 | Unassigned | Unassigned | Unassigned | 188_0  | Clustered           | 5 VC_188_0   | 5   | 0.6188 | 0.99999978 | 0.6188 | 0 | 0 | 0 | 1 Ref      |
| JF974308 | Unassigned | Unassigned | Unassigned | 188_0  | Clustered           | 5 VC_188_0   | 5   | 0.6188 | 0.99999978 | 0.6188 | 0 | 0 | 0 | 1 Ref      |
| JF974312 | Unassigned | Unassigned | Unassigned | 474_0  | Clustered           | 19 VC_474_0  | 19  | 0.3729 | 1          | 0.3729 | 0 | 0 | 0 | 1 Ref      |
| JF974313 | Unassigned | Unassigned | Unassigned | 661_2  | Clustered           | 6 VC_661_2   | 6   | 0.1674 | 1          | 0.1674 | 0 | 0 | 0 | 1 Ref      |
| JF974314 | Unassigned | Unassigned | Unassigned | 22_0   | Clustered           | 4 VC_22_0    | 4   | 0.562  | 0.91257778 | 0.5129 | 0 | 0 | 0 | 0.6667 Ref |
| JF974321 | Unassigned | Unassigned | Unassigned | 961_0  | Clustered           | 3 VC_961_0   | 3   | 0.783  | 0.9944138  | 0.7786 | 0 | 0 | 0 | 1 Ref      |
| JF974339 | Unassigned | Unassigned | Unassigned | 32_1   | Clustered           | 16 VC_32_1   | 16  | 0.1962 | 1          | 0.1962 | 0 | 0 | 0 | 0.8333 Ref |
| JN006061 | Unassigned | Unassigned | Unassigned | 571_2  | Clustered           | 17 VC_571_2  | 17  | 0.0965 | 1          | 0.0965 | 0 | 0 | 0 | 0.9779 Ref |
| JN006062 | Unassigned | Unassigned | Unassigned | 571_2  | Clustered           | 17 VC_571_2  | 17  | 0.0965 | 1          | 0.0965 | 0 | 0 | 0 | 0.9779 Ref |
| JN006063 | Unassigned | Unassigned | Unassigned | 384_15 | Clustered           | 44 VC_384_15 | 44  | 0.139  | 1          | 0.139  | 0 | 0 | 0 | 0.7474 Ref |
| JN006064 | Unassigned | Unassigned | Unassigned | 384_21 | Clustered           | 2 VC_384_21  | 2   | 0.0033 | 0.95771013 | 0.0032 | 0 | 0 | 0 | 1 Ref      |
| JN020140 | Unassigned | Unassigned | Unassigned | 335_19 | Clustered           | 3 VC_335_19  | 3   | 0.0107 | 0.99859221 | 0.0107 | 0 | 0 | 0 | 1 Ref      |
| JN020141 | Unassigned | Unassigned | Unassigned | 538_28 | Clustered           | 2 VC_538_28  | 2   | 0.0135 | 0.95761531 | 0.0129 | 0 | 0 | 0 | 1 Ref      |
| JN020142 | Unassigned | Unassigned | Unassigned | 538_88 | Clustered/Singleton | 1 VC_538_88  | 1   | 0      | 1          | 0      | 0 | 0 | 0 | 1 Ref      |
| JN020143 | Unassigned | Unassigned | Unassigned | 538_43 | Clustered           | 3 VC_538_43  | 3   | 0.0193 | 0.99837043 | 0.0192 | 0 | 0 | 0 | 1 Ref      |
| JN022534 | Unassigned | Unassigned | Unassigned | 65_0   | Clustered           | 3 VC_65_0    | 3   | 0.5621 | 0.99791205 | 0.5609 | 0 | 0 | 0 | 1 Ref      |
| JN035618 | Unassigned | Unassigned | Unassigned | 893_0  | Clustered           | 4 VC_893_0   | 4   | 0.0787 | 0.99998595 | 0.0787 | 0 | 0 | 0 | 1 Ref      |
| JN049605 | Unassigned | Unassigned | Unassigned | 230_0  | Clustered           | 38 VC_230_0  | 38  | 0.9076 | 1          | 0.9076 | 0 | 0 | 0 | 1 Ref      |
| JN051154 | Unassigned | Unassigned | Unassigned | 597_0  | Clustered           | 6 VC_597_0   | 6   | 0.9222 | 0.99999993 | 0.9222 | 0 | 0 | 0 | 1 Ref      |
| JN083852 | Unassigned | Unassigned | Unassigned | 974_0  | Clustered           | 34 VC_974_0  | 34  | 0.7953 | 1          | 0.7953 | 0 | 0 | 0 | 1 Ref      |
| JN083853 | Unassigned | Unassigned | Unassigned | 974_0  | Clustered           | 34 VC_974_0  | 34  | 0.7953 | 1          | 0.7953 | 0 | 0 | 0 | 1 Ref      |
| JN116822 | Unassigned | Unassigned | Unassigned | 984_0  | Clustered           | 5 VC_984_0   | 5   | 0.1708 | 0.99999984 | 0.1708 | 0 | 0 | 0 | 1 Ref      |
| JN116823 | Unassigned | Unassigned | Unassigned | 988_0  | Clustered           | 2 VC_988_0   | 2   | 0.2055 | 0.9488174  | 0.195  | 0 | 0 | 0 | 1 Ref      |
| JN116824 | Unassigned | Unassigned | Unassigned | 741_0  | Clustered           | 3 VC_741_0   | 3   | 0.038  | 0.88651    | 0.0337 | 0 | 0 | 0 | 1 Ref      |
| JN116826 | Unassigned | Unassigned | Unassigned | 991_0  | Clustered           | 39 VC_991_0  | 39  | 1      | 1          | 1      | 0 | 0 | 0 | 1 Ref      |
| JN116827 | Unassigned | Unassigned | Unassigned | 991_0  | Clustered           | 39 VC_991_0  | 39  | 1      | 1          | 1      | 0 | 0 | 0 | 1 Ref      |



|          |            |            |            |         |                     |     |            |     |        |            |        |   |   |   |        |     |
|----------|------------|------------|------------|---------|---------------------|-----|------------|-----|--------|------------|--------|---|---|---|--------|-----|
| JN116828 | Unassigned | Unassigned | Unassigned | 987_0   | Clustered           | 2   | VC_987_0   | 2   | 0.9225 | 0.90744399 | 0.8372 | 0 | 0 | 0 | 1      | Ref |
| JN126049 | Unassigned | Unassigned | Unassigned | 135_13  | Clustered           | 2   | VC_135_13  | 2   | 0.005  | 0.86394392 | 0.0044 | 0 | 0 | 0 | 1      | Ref |
| JN132397 | Unassigned | Unassigned | Unassigned | 868_0   | Clustered           | 27  | VC_868_0   | 27  | 0.9372 | 1          | 0.9372 | 0 | 0 | 0 | 1      | Ref |
| JN153085 | Unassigned | Unassigned | Unassigned | 335_54  | Clustered           | 5   | VC_335_54  | 5   | 0.0147 | 0.99999078 | 0.0147 | 0 | 0 | 0 | 0.7    | Ref |
| JN153086 | Unassigned | Unassigned | Unassigned | 335_61  | Clustered           | 8   | VC_335_61  | 8   | 0.0394 | 1          | 0.0394 | 0 | 0 | 0 | 0.7857 | Ref |
| JN175269 | Unassigned | Unassigned | Unassigned | 992_0   | Clustered/Singleton | 1   | VC_992_0   | 1   | 0      | 1          | 0      | 0 | 0 | 0 | 1      | Ref |
| JN185608 | Unassigned | Unassigned | Unassigned | 243_0   | Clustered           | 72  | VC_243_0   | 72  | 0.8089 | 1          | 0.8089 | 0 | 0 | 0 | 1      | Ref |
| JN190960 | Unassigned | Unassigned | Unassigned | 621_0   | Clustered           | 2   | VC_621_0   | 2   | 0.2279 | 0.95560476 | 0.2178 | 0 | 0 | 0 | 1      | Ref |
| JN192463 | Unassigned | Unassigned | Unassigned | 384_13  | Clustered           | 33  | VC_384_13  | 33  | 0.1785 | 1          | 0.1785 | 0 | 0 | 0 | 0.8769 | Ref |
| JN201525 | Unassigned | Unassigned | Unassigned | 566_0   | Clustered           | 2   | VC_566_0   | 2   | 0.0136 | 0.63748598 | 0.0087 | 0 | 0 | 0 | 1      | Ref |
| JN202312 | Unassigned | Unassigned | Unassigned | 290_148 | Clustered/Singleton | 1   | VC_290_148 | 1   | 0      | 1          | 0      | 0 | 0 | 0 | 1      | Ref |
| JN204348 | Unassigned | Unassigned | Unassigned | 579_0   | Clustered           | 2   | VC_579_0   | 2   | 0.0032 | 0.74796081 | 0.0024 | 0 | 0 | 0 | 1      | Ref |
| JN225449 | Unassigned | Unassigned | Unassigned | 340_4   | Clustered           | 2   | VC_340_4   | 2   | 0.0052 | 0.95746455 | 0.005  | 0 | 0 | 0 | 1      | Ref |
| JN243855 | Unassigned | Unassigned | Unassigned | 245_0   | Clustered           | 17  | VC_245_0   | 17  | 0.6081 | 1          | 0.6081 | 0 | 0 | 0 | 1      | Ref |
| JN243856 | Unassigned | Unassigned | Unassigned | 535_1   | Clustered           | 108 | VC_535_1   | 108 | 0.8479 | 1          | 0.8479 | 0 | 0 | 0 | 0.9955 | Ref |
| JN243857 | Unassigned | Unassigned | Unassigned | 535_0   | Clustered           | 18  | VC_535_0   | 18  | 0.1595 | 1          | 0.1595 | 0 | 0 | 0 | 1      | Ref |
| JN254800 | Unassigned | Unassigned | Unassigned | 80_0    | Clustered           | 64  | VC_80_0    | 64  | 0.418  | 1          | 0.418  | 0 | 0 | 0 | 0.7649 | Ref |
| JN254801 | Unassigned | Unassigned | Unassigned | 486_0   | Clustered           | 47  | VC_486_0   | 47  | 0.9022 | 1          | 0.9022 | 0 | 0 | 0 | 1      | Ref |
| JN255163 | Unassigned | Unassigned | Unassigned | 4_0     | Clustered           | 7   | VC_4_0     | 7   | 0.7823 | 1          | 0.7823 | 0 | 0 | 0 | 1      | Ref |
| JN256079 | Unassigned | Unassigned | Unassigned | 539_0   | Clustered           | 37  | VC_539_0   | 37  | 0.911  | 1          | 0.911  | 0 | 0 | 0 | 1      | Ref |
| JN371769 | Unassigned | Unassigned | Unassigned | 674_4   | Clustered/Singleton | 1   | VC_674_4   | 1   | 0      | 1          | 0      | 0 | 0 | 0 | 1      | Ref |
| JN377894 | Unassigned | Unassigned | Unassigned | 619_2   | Clustered           | 10  | VC_619_2   | 10  | 0.3034 | 1          | 0.3034 | 0 | 0 | 0 | 1      | Ref |
| JN377895 | Unassigned | Unassigned | Unassigned | 619_2   | Clustered           | 10  | VC_619_2   | 10  | 0.3034 | 1          | 0.3034 | 0 | 0 | 0 | 1      | Ref |
| JN382248 | Unassigned | Unassigned | Unassigned | 571_7   | Clustered           | 28  | VC_571_7   | 28  | 0.1651 | 1          | 0.1651 | 0 | 0 | 0 | 0.8519 | Ref |
| JN391180 | Unassigned | Unassigned | Unassigned | 492_0   | Clustered           | 20  | VC_492_0   | 20  | 0.7887 | 1          | 0.7887 | 0 | 0 | 0 | 1      | Ref |
| JN391441 | Unassigned | Unassigned | Unassigned | 571_7   | Clustered           | 28  | VC_571_7   | 28  | 0.1651 | 1          | 0.1651 | 0 | 0 | 0 | 0.8519 | Ref |
| JN398368 | Unassigned | Unassigned | Unassigned | 538_76  | Clustered           | 2   | VC_538_76  | 2   | 0.0091 | 0.95761376 | 0.0087 | 0 | 0 | 0 | 1      | Ref |
| JN398369 | Unassigned | Unassigned | Unassigned | 335_1   | Clustered           | 2   | VC_335_1   | 2   | 0.0043 | 0.95663348 | 0.0041 | 0 | 0 | 0 | 1      | Ref |
| JN408459 | Unassigned | Unassigned | Unassigned | 974_0   | Clustered           | 34  | VC_974_0   | 34  | 0.7953 | 1          | 0.7953 | 0 | 0 | 0 | 1      | Ref |
| JN408460 | Unassigned | Unassigned | Unassigned | 223_6   | Clustered           | 42  | VC_223_6   | 42  | 0.4717 | 1          | 0.4717 | 0 | 0 | 0 | 0.8351 | Ref |
| JN408461 | Unassigned | Unassigned | Unassigned | 223_3   | Clustered           | 8   | VC_223_3   | 8   | 0.0699 | 1          | 0.0699 | 0 | 0 | 0 | 0.8571 | Ref |
| JN412588 | Unassigned | Unassigned | Unassigned | 579_80  | Clustered/Singleton | 1   | VC_579_80  | 1   | 0      | 1          | 0      | 0 | 0 | 0 | 1      | Ref |
| JN412589 | Unassigned | Unassigned | Unassigned | 589_0   | Clustered           | 3   | VC_589_0   | 3   | 0.2072 | 0.99849937 | 0.2069 | 0 | 0 | 0 | 1      | Ref |
| JN412590 | Unassigned | Unassigned | Unassigned | 571_4   | Clustered           | 2   | VC_571_4   | 2   | 0.006  | 0.95695857 | 0.0057 | 0 | 0 | 0 | 1      | Ref |
| JN412591 | Unassigned | Unassigned | Unassigned | 537_0   | Clustered           | 39  | VC_537_0   | 39  | 0.8148 | 1          | 0.8148 | 0 | 0 | 0 | 1      | Ref |
| JN412592 | Unassigned | Unassigned | Unassigned | 579_0   | Clustered           | 2   | VC_579_0   | 2   | 0.0032 | 0.74796081 | 0.0024 | 0 | 0 | 0 | 1      | Ref |
| JN412593 | Unassigned | Unassigned | Unassigned | 783_0   | Clustered           | 67  | VC_783_0   | 67  | 0.8945 | 1          | 0.8945 | 0 | 0 | 0 | 1      | Ref |
| JN542517 | Unassigned | Unassigned | Unassigned | 538_59  | Clustered           | 5   | VC_538_59  | 5   | 0.0456 | 0.99999997 | 0.0456 | 0 | 0 | 0 | 1      | Ref |
| JN561150 | Unassigned | Unassigned | Unassigned | 535_1   | Clustered           | 108 | VC_535_1   | 108 | 0.8479 | 1          | 0.8479 | 0 | 0 | 0 | 0.9955 | Ref |
| JN572061 | Unassigned | Unassigned | Unassigned | 537_0   | Clustered           | 39  | VC_537_0   | 39  | 0.8148 | 1          | 0.8148 | 0 | 0 | 0 | 1      | Ref |
| JN572689 | Unassigned | Unassigned | Unassigned | 335_49  | Clustered           | 17  | VC_335_49  | 17  | 0.0731 | 1          | 0.0731 | 0 | 0 | 0 | 0.7721 | Ref |
| JN585957 | Unassigned | Unassigned | Unassigned | 372_0   | Clustered           | 7   | VC_372_0   | 7   | 0.3691 | 1          | 0.3691 | 0 | 0 | 0 | 1      | Ref |
| JN593240 | Unassigned | Unassigned | Unassigned | 135_25  | Clustered/Singleton | 1   | VC_135_25  | 1   | 0      | 1          | 0      | 0 | 0 | 0 | 1      | Ref |
| JN600960 | Unassigned | Unassigned | Unassigned | 32_1    | Clustered           | 16  | VC_32_1    | 16  | 0.1962 | 1          | 0.1962 | 0 | 0 | 0 | 0.8333 | Ref |
| JN618996 | Unassigned | Unassigned | Unassigned | 526_0   | Clustered           | 32  | VC_526_0   | 32  | 0.9037 | 1          | 0.9037 | 0 | 0 | 0 | 1      | Ref |
| JN624850 | Unassigned | Unassigned | Unassigned | 579_49  | Clustered           | 7   | VC_579_49  | 7   | 0.0194 | 0.98914431 | 0.0191 | 0 | 0 | 0 | 0.8571 | Ref |
| JN624851 | Unassigned | Unassigned | Unassigned | 539_0   | Clustered           | 37  | VC_539_0   | 37  | 0.911  | 1          | 0.911  | 0 | 0 | 0 | 1      | Ref |
| JN627160 | Unassigned | Unassigned | Unassigned | 456_2   | Clustered           | 4   | VC_456_2   | 4   | 0.0833 | 0.99988129 | 0.0833 | 0 | 0 | 0 | 0.8333 | Ref |
| JN638752 | Unassigned | Unassigned | Unassigned | 384_15  | Clustered           | 44  | VC_384_15  | 44  | 0.139  | 1          | 0.139  | 0 | 0 | 0 | 0.7474 | Ref |
| JN638753 | Unassigned | Unassigned | Unassigned | 384_15  | Clustered           | 44  | VC_384_15  | 44  | 0.139  | 1          | 0.139  | 0 | 0 | 0 | 0.7474 | Ref |
| JN641803 | Unassigned | Unassigned | Unassigned | 994_5   | Clustered           | 19  | VC_994_5   | 19  | 0.2622 | 1          | 0.2622 | 0 | 0 | 0 | 1      | Ref |
| JN643714 | Unassigned | Unassigned | Unassigned | 243_0   | Clustered           | 72  | VC_243_0   | 72  | 0.8089 | 1          | 0.8089 | 0 | 0 | 0 | 1      | Ref |
| JN651747 | Unassigned | Unassigned | Unassigned | 907_0   | Clustered           | 32  | VC_907_0   | 32  | 0.9964 | 1          | 0.9964 | 0 | 0 | 0 | 1      | Ref |
| JN654439 | Unassigned | Unassigned | Unassigned | 913_1   | Clustered           | 8   | VC_913_1   | 8   | 0.1102 | 0.9989323  | 0.11   | 0 | 0 | 0 | 0.75   | Ref |
| JN660814 | Unassigned | Unassigned | Unassigned | 335_44  | Clustered           | 3   | VC_335_44  | 3   | 0.0157 | 0.99859171 | 0.0157 | 0 | 0 | 0 | 1      | Ref |
| JN662425 | Unassigned | Unassigned | Unassigned | 168_0   | Clustered           | 18  | VC_168_0   | 18  | 0.7394 | 1          | 0.7394 | 0 | 0 | 0 | 0.8627 | Ref |
| JN672684 | Unassigned | Unassigned | Unassigned | 971_0   | Clustered           | 40  | VC_971_0   | 40  | 0.6793 | 1          | 0.6793 | 0 | 0 | 0 | 0.9359 | Ref |
| JN673056 | Unassigned | Unassigned | Unassigned | 135_26  | Clustered/Singleton | 1   | VC_135_26  | 1   | 0      | 1          | 0      | 0 | 0 | 0 | 1      | Ref |
| JN680858 | Unassigned | Unassigned | Unassigned | 917_0   | Clustered           | 28  | VC_917_0   | 28  | 0.5465 | 1          | 0.5465 | 0 | 0 | 0 | 1      | Ref |
| JN687951 | Unassigned | Unassigned | Unassigned | 335_60  | Clustered           | 2   | VC_335_60  | 2   | 0.0038 | 0.957513   | 0.0036 | 0 | 0 | 0 | 1      | Ref |
| JN698989 | Unassigned | Unassigned | Unassigned | 384_18  | Clustered           | 10  | VC_384_18  | 10  | 0.0301 | 1          | 0.0301 | 0 | 0 | 0 | 0.8    | Ref |
| JN698990 | Unassigned | Unassigned | Unassigned | 384_17  | Clustered           | 3   | VC_384_17  | 3   | 0.0075 | 0.99812032 | 0.0075 | 0 | 0 | 0 | 1      | Ref |
| JN698991 | Unassigned | Unassigned | Unassigned | 526_0   | Clustered           | 32  | VC_526_0   | 32  | 0.9037 | 1          | 0.9037 | 0 | 0 | 0 | 1      | Ref |
| JN698992 | Unassigned | Unassigned | Unassigned | 527_0   | Clustered           | 37  | VC_527_0   | 37  | 0.9679 | 1          | 0.9679 | 0 | 0 | 0 | 1      | Ref |
| JN698993 | Unassigned | Unassigned | Unassigned | 577_0   | Clustered           | 21  | VC_577_0   | 21  | 0.9908 | 1          | 0.9908 | 0 | 0 | 0 | 1      | Ref |
| JN698994 | Unassigned | Unassigned | Unassigned | 574_0   | Clustered           | 2   | VC_574_0   | 2   | 0.2216 | 0.9525409  | 0.2111 | 0 | 0 | 0 | 1      | Ref |
| JN698995 | Unassigned | Unassigned | Unassigned | 529_0   | Clustered           | 3   | VC_529_0   | 3   | 0.109  | 0.99858726 | 0.1089 | 0 | 0 | 0 | 1      | Ref |
| JN698996 | Unassigned | Unassigned | Unassigned | 538_26  | Clustered           | 3   | VC_538_26  | 3   | 0.0258 | 0.99859898 | 0.0258 | 0 | 0 | 0 | 1      | Ref |
| JN698997 | Unassigned | Unassigned | Unassigned | 566_2   | Clustered           | 3   | VC_566_2   | 3   | 0.0275 | 0.85806939 | 0.0236 | 0 | 0 | 0 | 1      | Ref |
| JN698998 | Unassigned | Unassigned | Unassigned | 335_61  | Clustered           | 8   | VC_335_61  | 8   | 0.0394 | 1          | 0.0394 | 0 | 0 | 0 | 0.7857 | Ref |
| JN698999 | Unassigned | Unassigned | Unassigned | 230_0   | Clustered           | 38  | VC_230_0   | 38  | 0.9076 | 1          | 0.9076 | 0 | 0 | 0 | 1      | Ref |
| JN699000 | Unassigned | Unassigned | Unassigned | 335_41  | Clustered           | 2   | VC_335_41  | 2   | 0.0045 | 0.9575092  | 0.0043 | 0 | 0 | 0 | 1      | Ref |
| JN699001 | Unassigned | Unassigned | Unassigned | 536_0   | Clustered           | 6   | VC_536_0   | 6   | 0.129  | 1          | 0.129  | 0 | 0 | 0 | 1      | Ref |
| JN699002 | Unassigned | Unassigned | Unassigned | 783_0   | Clustered           | 67  | VC_783_0   | 67  | 0.8945 | 1          | 0.8945 | 0 | 0 | 0 | 1      | Ref |
| JN699003 | Unassigned | Unassigned | Unassigned | 527_0   | Clustered           | 37  | VC_527_0   | 37  | 0.9679 | 1          | 0.9679 | 0 | 0 | 0 | 1      | Ref |
| JN699004 | Unassigned | Unassigned | Unassigned | 526_0   | Clustered           | 32  | VC_526_0   | 32  | 0.9037 | 1          | 0.9037 | 0 | 0 | 0 | 1      | Ref |
| JN699005 | Unassigned | Unassigned | Unassigned | 232_0   | Clustered           | 32  | VC_232_0   | 32  | 0.8471 | 1          | 0.8471 | 0 | 0 | 0 | 0.996  | Ref |
| JN699006 | Unassigned | Unassigned | Unassigned | 527_0   | Clustered           | 37  | VC_527_0   | 37  | 0.9679 | 1          | 0.9679 | 0 | 0 | 0 | 1      | Ref |
| JN699007 | Unassigned | Unassigned | Unassigned | 385_1   | Clustered           | 9   | VC_385_1   | 9   | 0.1928 | 1          | 0.1928 | 0 | 0 | 0 | 1      | Ref |
| JN699008 | Unassigned | Unassigned | Unassigned | 384_15  | Clustered           | 44  | VC_384_15  | 44  | 0.139  | 1          | 0.139  | 0 | 0 | 0 | 0.7474 | Ref |
| JN699009 | Unassigned | Unassigned | Unassigned | 384_16  | Clustered           | 42  | VC_384_16  | 42  | 0.134  | 1          | 0.134  | 0 | 0 | 0 | 0.7282 | Ref |



|          |            |            |            |         |                     |     |            |     |        |            |        |   |   |   |        |     |
|----------|------------|------------|------------|---------|---------------------|-----|------------|-----|--------|------------|--------|---|---|---|--------|-----|
| JN699010 | Unassigned | Unassigned | Unassigned | 384_15  | Clustered           | 44  | VC_384_15  | 44  | 0.139  | 1          | 0.139  | 0 | 0 | 0 | 0.7474 | Ref |
| JN699011 | Unassigned | Unassigned | Unassigned | 385_0   | Clustered           | 24  | VC_385_0   | 24  | 0.5516 | 1          | 0.5516 | 0 | 0 | 0 | 1      | Ref |
| JN699012 | Unassigned | Unassigned | Unassigned | 538_20  | Clustered/Singleton | 1   | VC_538_20  | 1   | 0      | 1          | 0      | 0 | 0 | 0 | 1      | Ref |
| JN699013 | Unassigned | Unassigned | Unassigned | 579_8   | Clustered           | 2   | VC_579_8   | 2   | 0.0032 | 0.66515174 | 0.0021 | 0 | 0 | 0 | 1      | Ref |
| JN699014 | Unassigned | Unassigned | Unassigned | 585_0   | Clustered           | 20  | VC_585_0   | 20  | 0.8376 | 1          | 0.8376 | 0 | 0 | 0 | 1      | Ref |
| JN699015 | Unassigned | Unassigned | Unassigned | 535_1   | Clustered           | 108 | VC_535_1   | 108 | 0.8479 | 1          | 0.8479 | 0 | 0 | 0 | 0.9955 | Ref |
| JN699016 | Unassigned | Unassigned | Unassigned | 335_37  | Clustered           | 4   | VC_335_37  | 4   | 0.0112 | 0.99980442 | 0.0112 | 0 | 0 | 0 | 0.6667 | Ref |
| JN699017 | Unassigned | Unassigned | Unassigned | 384_17  | Clustered           | 3   | VC_384_17  | 3   | 0.0075 | 0.99812032 | 0.0075 | 0 | 0 | 0 | 1      | Ref |
| JN699018 | Unassigned | Unassigned | Unassigned | 527_0   | Clustered           | 37  | VC_527_0   | 37  | 0.9679 | 1          | 0.9679 | 0 | 0 | 0 | 1      | Ref |
| JN699019 | Unassigned | Unassigned | Unassigned | 230_0   | Clustered           | 38  | VC_230_0   | 38  | 0.9076 | 1          | 0.9076 | 0 | 0 | 0 | 1      | Ref |
| JN699625 | Unassigned | Unassigned | Unassigned | 579_30  | Clustered           | 3   | VC_579_30  | 3   | 0.0064 | 0.74796372 | 0.0048 | 0 | 0 | 0 | 1      | Ref |
| JN699626 | Unassigned | Unassigned | Unassigned | 579_63  | Clustered/Singleton | 1   | VC_579_63  | 1   | 0      | 1          | 0      | 0 | 0 | 0 | 1      | Ref |
| JN699627 | Unassigned | Unassigned | Unassigned | 579_78  | Clustered/Singleton | 1   | VC_579_78  | 1   | 0      | 1          | 0      | 0 | 0 | 0 | 1      | Ref |
| JN699628 | Unassigned | Unassigned | Unassigned | 785_1   | Clustered           | 9   | VC_785_1   | 9   | 0.3679 | 1          | 0.3679 | 0 | 0 | 0 | 1      | Ref |
| JN712910 | Unassigned | Unassigned | Unassigned | 995_0   | Clustered           | 2   | VC_995_0   | 2   | 0.627  | 0.85557782 | 0.5365 | 0 | 0 | 0 | 1      | Ref |
| JN790865 | Unassigned | Unassigned | Unassigned | 912_2   | Clustered           | 2   | VC_912_2   | 2   | 0.018  | 0.88094852 | 0.0159 | 0 | 0 | 0 | 1      | Ref |
| JN797796 | Unassigned | Unassigned | Unassigned | 912_2   | Clustered           | 2   | VC_912_2   | 2   | 0.018  | 0.88094852 | 0.0159 | 0 | 0 | 0 | 1      | Ref |
| JN797797 | Unassigned | Unassigned | Unassigned | 195_1   | Clustered           | 7   | VC_195_1   | 7   | 0.1409 | 1          | 0.1409 | 0 | 0 | 0 | 1      | Ref |
| JN797798 | Unassigned | Unassigned | Unassigned | 195_1   | Clustered           | 7   | VC_195_1   | 7   | 0.1409 | 1          | 0.1409 | 0 | 0 | 0 | 1      | Ref |
| JN800508 | Unassigned | Unassigned | Unassigned | 928_0   | Clustered           | 6   | VC_928_0   | 6   | 0.4065 | 1          | 0.4065 | 0 | 0 | 0 | 1      | Ref |
| JN808773 | Unassigned | Unassigned | Unassigned | 185_0   | Clustered           | 53  | VC_185_0   | 53  | 0.9153 | 1          | 0.9153 | 0 | 0 | 0 | 1      | Ref |
| JN811560 | Unassigned | Unassigned | Unassigned | 185_0   | Clustered           | 53  | VC_185_0   | 53  | 0.9153 | 1          | 0.9153 | 0 | 0 | 0 | 1      | Ref |
| JN831653 | Unassigned | Unassigned | Unassigned | 241_0   | Clustered           | 21  | VC_241_0   | 21  | 0.8342 | 1          | 0.8342 | 0 | 0 | 0 | 1      | Ref |
| JN848801 | Unassigned | Unassigned | Unassigned | 27_0    | Clustered           | 4   | VC_27_0    | 4   | 0.7397 | 0.99936153 | 0.7392 | 0 | 0 | 0 | 1      | Ref |
| JN849462 | Unassigned | Unassigned | Unassigned | 549_1   | Clustered           | 6   | VC_549_1   | 6   | 0.1479 | 0.9998319  | 0.1478 | 0 | 0 | 0 | 1      | Ref |
| JN859129 | Unassigned | Unassigned | Unassigned | 538_23  | Clustered           | 2   | VC_538_23  | 2   | 0.0077 | 0.95763408 | 0.0074 | 0 | 0 | 0 | 1      | Ref |
| JN871591 | Unassigned | Unassigned | Unassigned | 611_0   | Clustered           | 50  | VC_611_0   | 50  | 0.7306 | 1          | 0.7306 | 0 | 0 | 0 | 1      | Ref |
| JN882264 | Unassigned | Unassigned | Unassigned | 858_0   | Clustered           | 7   | VC_858_0   | 7   | 1      | 1          | 1      | 0 | 0 | 0 | 1      | Ref |
| JN882266 | Unassigned | Unassigned | Unassigned | 858_0   | Clustered           | 7   | VC_858_0   | 7   | 1      | 1          | 1      | 0 | 0 | 0 | 1      | Ref |
| JN882267 | Unassigned | Unassigned | Unassigned | 998_0   | Clustered           | 2   | VC_998_0   | 2   | 0.3698 | 0.91237788 | 0.3374 | 0 | 0 | 0 | 1      | Ref |
| JN882284 | Unassigned | Unassigned | Unassigned | 601_4   | Clustered           | 3   | VC_601_4   | 3   | 0.0346 | 0.98052968 | 0.034  | 0 | 0 | 0 | 1      | Ref |
| JN882285 | Unassigned | Unassigned | Unassigned | 170_4   | Clustered/Singleton | 1   | VC_170_4   | 1   | 0      | 1          | 0      | 0 | 0 | 0 | 1      | Ref |
| JN882286 | Unassigned | Unassigned | Unassigned | 836_2   | Clustered           | 2   | VC_836_2   | 2   | 0.0659 | 0.95518138 | 0.063  | 0 | 0 | 0 | 1      | Ref |
| JN882287 | Unassigned | Unassigned | Unassigned | 687_0   | Clustered           | 21  | VC_687_0   | 21  | 0.3608 | 1          | 0.3608 | 0 | 0 | 0 | 1      | Ref |
| JN882298 | Unassigned | Unassigned | Unassigned | 73_0    | Clustered           | 2   | VC_73_0    | 2   | 0.077  | 0.95618005 | 0.0736 | 0 | 0 | 0 | 1      | Ref |
| JN939331 | Unassigned | Unassigned | Unassigned | 908_0   | Clustered           | 36  | VC_908_0   | 36  | 0.9943 | 1          | 0.9943 | 0 | 0 | 0 | 1      | Ref |
| JN939332 | Unassigned | Unassigned | Unassigned | 908_0   | Clustered           | 36  | VC_908_0   | 36  | 0.9943 | 1          | 0.9943 | 0 | 0 | 0 | 1      | Ref |
| JN968479 | Unassigned | Unassigned | Unassigned | 684_0   | Clustered           | 4   | VC_684_0   | 4   | 1      | 1          | 1      | 0 | 0 | 0 | 1      | Ref |
| JN984867 | Unassigned | Unassigned | Unassigned | 859_0   | Clustered           | 67  | VC_859_0   | 67  | 0.9622 | 1          | 0.9622 | 0 | 0 | 0 | 1      | Ref |
| JN986844 | Unassigned | Unassigned | Unassigned | 466_0   | Clustered           | 66  | VC_466_0   | 66  | 0.9246 | 1          | 0.9246 | 0 | 0 | 0 | 1      | Ref |
| JN986845 | Unassigned | Unassigned | Unassigned | 470_0   | Clustered           | 62  | VC_470_0   | 62  | 0.902  | 1          | 0.902  | 0 | 0 | 0 | 1      | Ref |
| JN986846 | Unassigned | Unassigned | Unassigned | 290_115 | Clustered/Singleton | 1   | VC_290_115 | 1   | 0      | 1          | 0      | 0 | 0 | 0 | 1      | Ref |
| JQ007353 | Unassigned | Unassigned | Unassigned | 654_0   | Clustered           | 115 | VC_654_0   | 115 | 0.7303 | 1          | 0.7303 | 0 | 0 | 0 | 0.8764 | Ref |
| JQ010983 | Unassigned | Unassigned | Unassigned | 977_0   | Clustered           | 2   | VC_977_0   | 2   | 1      | 1          | 1      | 0 | 0 | 0 | 1      | Ref |
| JQ011317 | Unassigned | Unassigned | Unassigned | 492_0   | Clustered           | 20  | VC_492_0   | 20  | 0.7887 | 1          | 0.7887 | 0 | 0 | 0 | 1      | Ref |
| JQ011318 | Unassigned | Unassigned | Unassigned | 44_0    | Clustered           | 49  | VC_44_0    | 49  | 0.4506 | 1          | 0.4506 | 0 | 0 | 0 | 0.8605 | Ref |
| JQ015307 | Unassigned | Unassigned | Unassigned | 873_2   | Clustered           | 2   | VC_873_2   | 2   | 0.0245 | 0.87022547 | 0.0213 | 0 | 0 | 0 | 1      | Ref |
| JQ031132 | Unassigned | Unassigned | Unassigned | 794_4   | Clustered           | 4   | VC_794_4   | 4   | 0.0181 | 0.73018303 | 0.0132 | 0 | 0 | 0 | 1      | Ref |
| JQ062992 | Unassigned | Unassigned | Unassigned | 719_0   | Clustered           | 16  | VC_719_0   | 16  | 0.728  | 1          | 0.728  | 0 | 0 | 0 | 1      | Ref |
| JQ067084 | Unassigned | Unassigned | Unassigned | 479_0   | Clustered           | 7   | VC_479_0   | 7   | 0.3294 | 1          | 0.3294 | 0 | 0 | 0 | 1      | Ref |
| JQ067085 | Unassigned | Unassigned | Unassigned | 185_0   | Clustered           | 53  | VC_185_0   | 53  | 0.9153 | 1          | 0.9153 | 0 | 0 | 0 | 1      | Ref |
| JQ067087 | Unassigned | Unassigned | Unassigned | 478_0   | Clustered           | 8   | VC_478_0   | 8   | 0.2619 | 1          | 0.2619 | 0 | 0 | 0 | 1      | Ref |
| JQ067089 | Unassigned | Unassigned | Unassigned | 175_0   | Clustered           | 20  | VC_175_0   | 20  | 0.7504 | 1          | 0.7504 | 0 | 0 | 0 | 1      | Ref |
| JQ067092 | Unassigned | Unassigned | Unassigned | 766_0   | Clustered           | 40  | VC_766_0   | 40  | 0.7511 | 1          | 0.7511 | 0 | 0 | 0 | 1      | Ref |
| JQ067093 | Unassigned | Unassigned | Unassigned | 175_0   | Clustered           | 20  | VC_175_0   | 20  | 0.7504 | 1          | 0.7504 | 0 | 0 | 0 | 1      | Ref |
| JQ086375 | Unassigned | Unassigned | Unassigned | 859_0   | Clustered           | 67  | VC_859_0   | 67  | 0.9622 | 1          | 0.9622 | 0 | 0 | 0 | 1      | Ref |
| JQ086376 | Unassigned | Unassigned | Unassigned | 45_0    | Clustered           | 38  | VC_45_0    | 38  | 0.5785 | 1          | 0.5785 | 0 | 0 | 0 | 0.9659 | Ref |
| JQ177061 | Unassigned | Unassigned | Unassigned | 123_0   | Clustered           | 4   | VC_123_0   | 4   | 0.1802 | 0.99998531 | 0.1802 | 0 | 0 | 0 | 1      | Ref |
| JQ177062 | Unassigned | Unassigned | Unassigned | 940_0   | Clustered           | 2   | VC_940_0   | 2   | 0.4996 | 0.9262493  | 0.4628 | 0 | 0 | 0 | 1      | Ref |
| JQ177063 | Unassigned | Unassigned | Unassigned | 380_0   | Clustered           | 6   | VC_380_0   | 6   | 0.51   | 1          | 0.51   | 0 | 0 | 0 | 1      | Ref |
| JQ177064 | Unassigned | Unassigned | Unassigned | 123_0   | Clustered           | 4   | VC_123_0   | 4   | 0.1802 | 0.99998531 | 0.1802 | 0 | 0 | 0 | 1      | Ref |
| JQ182728 | Unassigned | Unassigned | Unassigned | 53_0    | Clustered           | 10  | VC_53_0    | 10  | 0.1743 | 1          | 0.1743 | 0 | 0 | 0 | 1      | Ref |
| JQ182729 | Unassigned | Unassigned | Unassigned | 36_0    | Clustered           | 4   | VC_36_0    | 4   | 0.0597 | 0.99994573 | 0.0597 | 0 | 0 | 0 | 1      | Ref |
| JQ182733 | Unassigned | Unassigned | Unassigned | 32_0    | Clustered           | 2   | VC_32_0    | 2   | 0.0369 | 0.95734637 | 0.0353 | 0 | 0 | 0 | 1      | Ref |
| JQ182734 | Unassigned | Unassigned | Unassigned | 32_0    | Clustered           | 2   | VC_32_0    | 2   | 0.0369 | 0.95734637 | 0.0353 | 0 | 0 | 0 | 1      | Ref |
| JQ182735 | Unassigned | Unassigned | Unassigned | 45_0    | Clustered           | 38  | VC_45_0    | 38  | 0.5785 | 1          | 0.5785 | 0 | 0 | 0 | 0.9659 | Ref |
| JQ182736 | Unassigned | Unassigned | Unassigned | 469_0   | Clustered           | 18  | VC_469_0   | 18  | 0.4583 | 1          | 0.4583 | 0 | 0 | 0 | 1      | Ref |
| JQ245707 | Unassigned | Unassigned | Unassigned | 504_0   | Clustered           | 4   | VC_504_0   | 4   | 0.2554 | 0.99998753 | 0.2554 | 0 | 0 | 0 | 1      | Ref |
| JQ287645 | Unassigned | Unassigned | Unassigned | 458_0   | Clustered           | 2   | VC_458_0   | 2   | 0.8124 | 0.72985431 | 0.593  | 0 | 0 | 0 | 1      | Ref |
| JQ300538 | Unassigned | Unassigned | Unassigned | 538_77  | Clustered           | 3   | VC_538_77  | 3   | 0.0216 | 0.99859911 | 0.0216 | 0 | 0 | 0 | 1      | Ref |
| JQ307386 | Unassigned | Unassigned | Unassigned | 434_0   | Clustered           | 45  | VC_434_0   | 45  | 0.9479 | 1          | 0.9479 | 0 | 0 | 0 | 1      | Ref |
| JQ307387 | Unassigned | Unassigned | Unassigned | 766_0   | Clustered           | 40  | VC_766_0   | 40  | 0.7511 | 1          | 0.7511 | 0 | 0 | 0 | 1      | Ref |
| JQ309827 | Unassigned | Unassigned | Unassigned | 1003_0  | Clustered           | 16  | VC_1003_0  | 16  | 0.8967 | 1          | 0.8967 | 0 | 0 | 0 | 1      | Ref |
| JQ312117 | Unassigned | Unassigned | Unassigned | 1005_0  | Clustered           | 3   | VC_1005_0  | 3   | 0.8261 | 0.99765766 | 0.8242 | 0 | 0 | 0 | 1      | Ref |
| JQ340389 | Unassigned | Unassigned | Unassigned | 1007_1  | Clustered           | 24  | VC_1007_1  | 24  | 0.7364 | 1          | 0.7364 | 0 | 0 | 0 | 0.8877 | Ref |
| JQ340774 | Unassigned | Unassigned | Unassigned | 611_0   | Clustered           | 50  | VC_611_0   | 50  | 0.7306 | 1          | 0.7306 | 0 | 0 | 0 | 1      | Ref |
| JQ347801 | Unassigned | Unassigned | Unassigned | 43_0    | Clustered           | 16  | VC_43_0    | 16  | 0.2017 | 1          | 0.2017 | 0 | 0 | 0 | 0.9667 | Ref |
| JQ408219 | Unassigned | Unassigned | Unassigned | 56_0    | Clustered           | 6   | VC_56_0    | 6   | 0.6713 | 0.99999999 | 0.6713 | 0 | 0 | 0 | 1      | Ref |
| JQ512844 | Unassigned | Unassigned | Unassigned | 533_0   | Clustered           | 16  | VC_533_0   | 16  | 0.3765 | 1          | 0.3765 | 0 | 0 | 0 | 1      | Ref |
| JQ513383 | Unassigned | Unassigned | Unassigned | 170_10  | Clustered           | 5   | VC_170_10  | 5   | 0.0614 | 0.96483582 | 0.0592 | 0 | 0 | 0 | 1      | Ref |
| JQ617284 | Unassigned | Unassigned | Unassigned | 101_0   | Clustered           | 32  | VC_101_0   | 32  | 0.8826 | 1          | 0.8826 | 0 | 0 | 0 | 1      | Ref |



|          |            |            |            |        |                     |              |     |        |            |        |   |   |   |            |
|----------|------------|------------|------------|--------|---------------------|--------------|-----|--------|------------|--------|---|---|---|------------|
| JQ619704 | Unassigned | Unassigned | Unassigned | 852_0  | Clustered           | 3 VC_852_0   | 3   | 0.4886 | 0.99843584 | 0.4878 | 0 | 0 | 0 | 1 Ref      |
| JQ659259 | Unassigned | Unassigned | Unassigned | 888_0  | Clustered           | 9 VC_888_0   | 9   | 0.5251 | 1          | 0.5251 | 0 | 0 | 0 | 1 Ref      |
| JQ660954 | Unassigned | Unassigned | Unassigned | 561_0  | Clustered           | 3 VC_561_0   | 3   | 0.3411 | 0.99792547 | 0.3404 | 0 | 0 | 0 | 1 Ref      |
| JQ684677 | Unassigned | Unassigned | Unassigned | 974_0  | Clustered           | 34 VC_974_0  | 34  | 0.7953 | 1          | 0.7953 | 0 | 0 | 0 | 1 Ref      |
| JQ686190 | Unassigned | Unassigned | Unassigned | 155_15 | Clustered           | 16 VC_155_15 | 16  | 0.0779 | 1          | 0.0779 | 0 | 0 | 0 | 0.8083 Ref |
| JQ691610 | Unassigned | Unassigned | Unassigned | 492_0  | Clustered           | 20 VC_492_0  | 20  | 0.7887 | 1          | 0.7887 | 0 | 0 | 0 | 1 Ref      |
| JQ691611 | Unassigned | Unassigned | Unassigned | 873_6  | Clustered           | 7 VC_873_6   | 7   | 0.1635 | 0.99999999 | 0.1635 | 0 | 0 | 0 | 0.9524 Ref |
| JQ691612 | Unassigned | Unassigned | Unassigned | 873_5  | Clustered           | 3 VC_873_5   | 3   | 0.0491 | 0.9761082  | 0.0479 | 0 | 0 | 0 | 1 Ref      |
| JQ692107 | Unassigned | Unassigned | Unassigned | 911_0  | Clustered           | 20 VC_911_0  | 20  | 0.9915 | 1          | 0.9915 | 0 | 0 | 0 | 1 Ref      |
| JQ698665 | Unassigned | Unassigned | Unassigned | 335_49 | Clustered           | 17 VC_335_49 | 17  | 0.0731 | 1          | 0.0731 | 0 | 0 | 0 | 0.7721 Ref |
| JQ729990 | Unassigned | Unassigned | Unassigned | 929_0  | Clustered           | 10 VC_929_0  | 10  | 0.7185 | 1          | 0.7185 | 0 | 0 | 0 | 1 Ref      |
| JQ729991 | Unassigned | Unassigned | Unassigned | 929_0  | Clustered           | 10 VC_929_0  | 10  | 0.7185 | 1          | 0.7185 | 0 | 0 | 0 | 1 Ref      |
| JQ729992 | Unassigned | Unassigned | Unassigned | 929_0  | Clustered           | 10 VC_929_0  | 10  | 0.7185 | 1          | 0.7185 | 0 | 0 | 0 | 1 Ref      |
| JQ762257 | Unassigned | Unassigned | Unassigned | 185_0  | Clustered           | 53 VC_185_0  | 53  | 0.9153 | 1          | 0.9153 | 0 | 0 | 0 | 1 Ref      |
| JQ764986 | Unassigned | Unassigned | Unassigned | 310_0  | Clustered           | 155 VC_310_0 | 155 | 0.9979 | 1          | 0.9979 | 0 | 0 | 0 | 1 Ref      |
| JQ764987 | Unassigned | Unassigned | Unassigned | 310_0  | Clustered           | 155 VC_310_0 | 155 | 0.9979 | 1          | 0.9979 | 0 | 0 | 0 | 1 Ref      |
| JQ764988 | Unassigned | Unassigned | Unassigned | 310_0  | Clustered           | 155 VC_310_0 | 155 | 0.9979 | 1          | 0.9979 | 0 | 0 | 0 | 1 Ref      |
| JQ764989 | Unassigned | Unassigned | Unassigned | 310_0  | Clustered           | 155 VC_310_0 | 155 | 0.9979 | 1          | 0.9979 | 0 | 0 | 0 | 1 Ref      |
| JQ764990 | Unassigned | Unassigned | Unassigned | 310_0  | Clustered           | 155 VC_310_0 | 155 | 0.9979 | 1          | 0.9979 | 0 | 0 | 0 | 1 Ref      |
| JQ779023 | Unassigned | Unassigned | Unassigned | 8_0    | Clustered           | 58 VC_8_0    | 58  | 0.8285 | 1          | 0.8285 | 0 | 0 | 0 | 0.9946 Ref |
| JQ779024 | Unassigned | Unassigned | Unassigned | 9_0    | Clustered           | 38 VC_9_0    | 38  | 0.4859 | 1          | 0.4859 | 0 | 0 | 0 | 1 Ref      |
| JQ780163 | Unassigned | Unassigned | Unassigned | 83_0   | Clustered           | 24 VC_83_0   | 24  | 0.7345 | 1          | 0.7345 | 0 | 0 | 0 | 1 Ref      |
| JQ780327 | Unassigned | Unassigned | Unassigned | 237_0  | Clustered           | 3 VC_237_0   | 3   | 0.0732 | 0.99355836 | 0.0727 | 0 | 0 | 0 | 0.6667 Ref |
| JQ797329 | Unassigned | Unassigned | Unassigned | 753_0  | Clustered           | 26 VC_753_0  | 26  | 0.9562 | 1          | 0.9562 | 0 | 0 | 0 | 1 Ref      |
| JQ806763 | Unassigned | Unassigned | Unassigned | 30_1   | Clustered           | 53 VC_30_1   | 53  | 0.7151 | 1          | 0.7151 | 0 | 0 | 0 | 0.9325 Ref |
| JQ809650 | Unassigned | Unassigned | Unassigned | 311_0  | Clustered           | 11 VC_311_0  | 11  | 0.7851 | 1          | 0.7851 | 0 | 0 | 0 | 1 Ref      |
| JQ809701 | Unassigned | Unassigned | Unassigned | 535_1  | Clustered           | 108 VC_535_1 | 108 | 0.8479 | 1          | 0.8479 | 0 | 0 | 0 | 0.9955 Ref |
| JQ809703 | Unassigned | Unassigned | Unassigned | 335_49 | Clustered           | 17 VC_335_49 | 17  | 0.0731 | 1          | 0.0731 | 0 | 0 | 0 | 0.7721 Ref |
| JQ823122 | Unassigned | Unassigned | Unassigned | 1010_0 | Clustered           | 2 VC_1010_0  | 2   | 1      | 1          | 1      | 0 | 0 | 0 | 1 Ref      |
| JQ823123 | Unassigned | Unassigned | Unassigned | 1010_0 | Clustered           | 2 VC_1010_0  | 2   | 1      | 1          | 1      | 0 | 0 | 0 | 1 Ref      |
| JQ837901 | Unassigned | Unassigned | Unassigned | 466_0  | Clustered           | 66 VC_466_0  | 66  | 0.9246 | 1          | 0.9246 | 0 | 0 | 0 | 1 Ref      |
| JQ867099 | Unassigned | Unassigned | Unassigned | 855_0  | Clustered           | 12 VC_855_0  | 12  | 0.6068 | 1          | 0.6068 | 0 | 0 | 0 | 1 Ref      |
| JQ896627 | Unassigned | Unassigned | Unassigned | 535_1  | Clustered           | 108 VC_535_1 | 108 | 0.8479 | 1          | 0.8479 | 0 | 0 | 0 | 0.9955 Ref |
| JQ911768 | Unassigned | Unassigned | Unassigned | 579_50 | Clustered           | 15 VC_579_50 | 15  | 0.0467 | 1          | 0.0467 | 0 | 0 | 0 | 0.9238 Ref |
| JQ957925 | Unassigned | Unassigned | Unassigned | 405_0  | Clustered           | 126 VC_405_0 | 126 | 0.9614 | 1          | 0.9614 | 0 | 0 | 0 | 1 Ref      |
| JQ957932 | Unassigned | Unassigned | Unassigned | 8_0    | Clustered           | 58 VC_8_0    | 58  | 0.8285 | 1          | 0.8285 | 0 | 0 | 0 | 0.9946 Ref |
| JQ965645 | Unassigned | Unassigned | Unassigned | 738_0  | Clustered           | 9 VC_738_0   | 9   | 0.7116 | 1          | 0.7116 | 0 | 0 | 0 | 1 Ref      |
| JQ965700 | Unassigned | Unassigned | Unassigned | 405_0  | Clustered           | 126 VC_405_0 | 126 | 0.9614 | 1          | 0.9614 | 0 | 0 | 0 | 1 Ref      |
| JQ965701 | Unassigned | Unassigned | Unassigned | 405_0  | Clustered           | 126 VC_405_0 | 126 | 0.9614 | 1          | 0.9614 | 0 | 0 | 0 | 1 Ref      |
| JQ965702 | Unassigned | Unassigned | Unassigned | 399_0  | Clustered           | 49 VC_399_0  | 49  | 0.7927 | 1          | 0.7927 | 0 | 0 | 0 | 1 Ref      |
| JQ965703 | Unassigned | Unassigned | Unassigned | 405_0  | Clustered           | 126 VC_405_0 | 126 | 0.9614 | 1          | 0.9614 | 0 | 0 | 0 | 1 Ref      |
| JQ966307 | Unassigned | Unassigned | Unassigned | 322_0  | Clustered           | 12 VC_322_0  | 12  | 0.8924 | 1          | 0.8924 | 0 | 0 | 0 | 1 Ref      |
| JQ973847 | Unassigned | Unassigned | Unassigned | 12_0   | Clustered           | 21 VC_12_0   | 21  | 0.2262 | 1          | 0.2262 | 0 | 0 | 0 | 0.9571 Ref |
| JX000007 | Unassigned | Unassigned | Unassigned | 405_0  | Clustered           | 126 VC_405_0 | 126 | 0.9614 | 1          | 0.9614 | 0 | 0 | 0 | 1 Ref      |
| JX013863 | Unassigned | Unassigned | Unassigned | 12_2   | Clustered           | 19 VC_12_2   | 19  | 0.2009 | 1          | 0.2009 | 0 | 0 | 0 | 1 Ref      |
| JX042578 | Unassigned | Unassigned | Unassigned | 974_0  | Clustered           | 34 VC_974_0  | 34  | 0.7953 | 1          | 0.7953 | 0 | 0 | 0 | 1 Ref      |
| JX042579 | Unassigned | Unassigned | Unassigned | 244_1  | Clustered           | 13 VC_244_1  | 13  | 0.1766 | 1          | 0.1766 | 0 | 0 | 0 | 0.7308 Ref |
| JX080300 | Unassigned | Unassigned | Unassigned | 155_8  | Clustered           | 66 VC_155_8  | 66  | 0.4537 | 1          | 0.4537 | 0 | 0 | 0 | 0.8182 Ref |
| JX080301 | Unassigned | Unassigned | Unassigned | 155_8  | Clustered           | 66 VC_155_8  | 66  | 0.4537 | 1          | 0.4537 | 0 | 0 | 0 | 0.8182 Ref |
| JX080302 | Unassigned | Unassigned | Unassigned | 155_8  | Clustered           | 66 VC_155_8  | 66  | 0.4537 | 1          | 0.4537 | 0 | 0 | 0 | 0.8182 Ref |
| JX080303 | Unassigned | Unassigned | Unassigned | 155_8  | Clustered           | 66 VC_155_8  | 66  | 0.4537 | 1          | 0.4537 | 0 | 0 | 0 | 0.8182 Ref |
| JX080304 | Unassigned | Unassigned | Unassigned | 155_8  | Clustered           | 66 VC_155_8  | 66  | 0.4537 | 1          | 0.4537 | 0 | 0 | 0 | 0.8182 Ref |
| JX080305 | Unassigned | Unassigned | Unassigned | 155_8  | Clustered           | 66 VC_155_8  | 66  | 0.4537 | 1          | 0.4537 | 0 | 0 | 0 | 0.8182 Ref |
| JX094431 | Unassigned | Unassigned | Unassigned | 195_3  | Clustered           | 9 VC_195_3   | 9   | 0.1955 | 1          | 0.1955 | 0 | 0 | 0 | 0.8611 Ref |
| JX094499 | Unassigned | Unassigned | Unassigned | 611_0  | Clustered           | 50 VC_611_0  | 50  | 0.7306 | 1          | 0.7306 | 0 | 0 | 0 | 1 Ref      |
| JX094500 | Unassigned | Unassigned | Unassigned | 994_0  | Clustered           | 5 VC_994_0   | 5   | 0.0495 | 0.99983811 | 0.0494 | 0 | 0 | 0 | 1 Ref      |
| JX094501 | Unassigned | Unassigned | Unassigned | 12_2   | Clustered           | 19 VC_12_2   | 19  | 0.2009 | 1          | 0.2009 | 0 | 0 | 0 | 1 Ref      |
| JX100809 | Unassigned | Unassigned | Unassigned | 1011_4 | Clustered           | 11 VC_1011_4 | 11  | 0.3331 | 1          | 0.3331 | 0 | 0 | 0 | 1 Ref      |
| JX100810 | Unassigned | Unassigned | Unassigned | 1011_2 | Clustered           | 2 VC_1011_2  | 2   | 0.0273 | 0.95410794 | 0.0261 | 0 | 0 | 0 | 1 Ref      |
| JX100811 | Unassigned | Unassigned | Unassigned | 1011_4 | Clustered           | 11 VC_1011_4 | 11  | 0.3331 | 1          | 0.3331 | 0 | 0 | 0 | 1 Ref      |
| JX100812 | Unassigned | Unassigned | Unassigned | 1011_4 | Clustered           | 11 VC_1011_4 | 11  | 0.3331 | 1          | 0.3331 | 0 | 0 | 0 | 1 Ref      |
| JX100813 | Unassigned | Unassigned | Unassigned | 1011_4 | Clustered           | 11 VC_1011_4 | 11  | 0.3331 | 1          | 0.3331 | 0 | 0 | 0 | 1 Ref      |
| JX100814 | Unassigned | Unassigned | Unassigned | 1011_3 | Clustered           | 2 VC_1011_3  | 2   | 0.0256 | 0.88402892 | 0.0226 | 0 | 0 | 0 | 1 Ref      |
| JX104231 | Unassigned | Unassigned | Unassigned | 168_0  | Clustered           | 18 VC_168_0  | 18  | 0.7394 | 1          | 0.7394 | 0 | 0 | 0 | 0.8627 Ref |
| JX120799 | Unassigned | Unassigned | Unassigned | 393_0  | Clustered           | 5 VC_393_0   | 5   | 0.4703 | 0.99999992 | 0.4703 | 0 | 0 | 0 | 0.9 Ref    |
| JX121091 | Unassigned | Unassigned | Unassigned | 538_26 | Clustered           | 3 VC_538_26  | 3   | 0.0258 | 0.99859898 | 0.0258 | 0 | 0 | 0 | 1 Ref      |
| JX123262 | Unassigned | Unassigned | Unassigned | 457_4  | Clustered           | 10 VC_457_4  | 10  | 0.3316 | 1          | 0.3316 | 0 | 0 | 0 | 0.9333 Ref |
| JX126918 | Unassigned | Unassigned | Unassigned | 753_0  | Clustered           | 26 VC_753_0  | 26  | 0.9562 | 1          | 0.9562 | 0 | 0 | 0 | 1 Ref      |
| JX126919 | Unassigned | Unassigned | Unassigned | 1002_0 | Clustered           | 10 VC_1002_0 | 10  | 0.9987 | 1          | 0.9987 | 0 | 0 | 0 | 1 Ref      |
| JX126920 | Unassigned | Unassigned | Unassigned | 1002_0 | Clustered           | 10 VC_1002_0 | 10  | 0.9987 | 1          | 0.9987 | 0 | 0 | 0 | 1 Ref      |
| JX128257 | Unassigned | Unassigned | Unassigned | 135_22 | Clustered           | 13 VC_135_22 | 13  | 0.0795 | 1          | 0.0795 | 0 | 0 | 0 | 0.8205 Ref |
| JX128258 | Unassigned | Unassigned | Unassigned | 636_0  | Clustered           | 13 VC_636_0  | 13  | 0.6223 | 1          | 0.6223 | 0 | 0 | 0 | 1 Ref      |
| JX128259 | Unassigned | Unassigned | Unassigned | 290_95 | Clustered/Singleton | 1 VC_290_95  | 1   | 0      | 1          | 0      | 0 | 0 | 0 | 1 Ref      |
| JX131330 | Unassigned | Unassigned | Unassigned | 172_0  | Clustered           | 26 VC_172_0  | 26  | 0.7909 | 1          | 0.7909 | 0 | 0 | 0 | 1 Ref      |
| JX145342 | Unassigned | Unassigned | Unassigned | 666_0  | Clustered           | 11 VC_666_0  | 11  | 0.5822 | 1          | 0.5822 | 0 | 0 | 0 | 1 Ref      |
| JX163858 | Unassigned | Unassigned | Unassigned | 1011_4 | Clustered           | 11 VC_1011_4 | 11  | 0.3331 | 1          | 0.3331 | 0 | 0 | 0 | 1 Ref      |
| JX173487 | Unassigned | Unassigned | Unassigned | 132_0  | Clustered           | 19 VC_132_0  | 19  | 0.6051 | 1          | 0.6051 | 0 | 0 | 0 | 1 Ref      |
| JX174275 | Unassigned | Unassigned | Unassigned | 8_0    | Clustered           | 58 VC_8_0    | 58  | 0.8285 | 1          | 0.8285 | 0 | 0 | 0 | 0.9946 Ref |
| JX181822 | Unassigned | Unassigned | Unassigned | 340_1  | Clustered           | 17 VC_340_1  | 17  | 0.0863 | 1          | 0.0863 | 0 | 0 | 0 | 0.8235 Ref |
| JX181824 | Unassigned | Unassigned | Unassigned | 601_5  | Clustered           | 4 VC_601_5   | 4   | 0.0525 | 0.99930943 | 0.0525 | 0 | 0 | 0 | 0.8333 Ref |
| JX181828 | Unassigned | Unassigned | Unassigned | 135_22 | Clustered           | 13 VC_135_22 | 13  | 0.0795 | 1          | 0.0795 | 0 | 0 | 0 | 0.8205 Ref |



|          |            |            |            |        |                     |              |     |        |            |        |   |   |   |        |       |
|----------|------------|------------|------------|--------|---------------------|--------------|-----|--------|------------|--------|---|---|---|--------|-------|
| JX181829 | Unassigned | Unassigned | Unassigned | 133_2  | Clustered           | 7 VC_133_2   | 7   | 0.0679 | 1          | 0.0679 | 0 | 0 | 0 | 0.9048 | Ref   |
| JX182369 | Unassigned | Unassigned | Unassigned | 1015_0 | Clustered           | 3 VC_1015_0  | 3   | 0.0529 | 0.99853685 | 0.0528 | 0 | 0 | 0 |        | 1 Ref |
| JX182370 | Unassigned | Unassigned | Unassigned | 1015_1 | Clustered           | 26 VC_1015_1 | 26  | 0.6989 | 1          | 0.6989 | 0 | 0 | 0 |        | 1 Ref |
| JX182371 | Unassigned | Unassigned | Unassigned | 742_0  | Clustered           | 11 VC_742_0  | 11  | 0.5046 | 1          | 0.5046 | 0 | 0 | 0 |        | 1 Ref |
| JX182372 | Unassigned | Unassigned | Unassigned | 386_0  | Clustered           | 10 VC_386_0  | 10  | 0.7454 | 1          | 0.7454 | 0 | 0 | 0 |        | 1 Ref |
| JX193904 | Unassigned | Unassigned | Unassigned | 711_0  | Clustered           | 48 VC_711_0  | 48  | 0.8217 | 1          | 0.8217 | 0 | 0 | 0 |        | 1 Ref |
| JX194238 | Unassigned | Unassigned | Unassigned | 862_0  | Clustered           | 29 VC_862_0  | 29  | 0.8594 | 1          | 0.8594 | 0 | 0 | 0 |        | 1 Ref |
| JX194239 | Unassigned | Unassigned | Unassigned | 159_0  | Clustered           | 25 VC_159_0  | 25  | 0.7699 | 1          | 0.7699 | 0 | 0 | 0 |        | 1 Ref |
| JX202565 | Unassigned | Unassigned | Unassigned | 654_0  | Clustered           | 115 VC_654_0 | 115 | 0.7303 | 1          | 0.7303 | 0 | 0 | 0 | 0.8764 | Ref   |
| JX233784 | Unassigned | Unassigned | Unassigned | 356_0  | Clustered           | 21 VC_356_0  | 21  | 0.5409 | 1          | 0.5409 | 0 | 0 | 0 |        | 1 Ref |
| JX238501 | Unassigned | Unassigned | Unassigned | 87_6   | Clustered/Singleton | 1 VC_87_6    | 1   | 0      | 1          | 0      | 0 | 0 | 0 |        | 1 Ref |
| JX262215 | Unassigned | Unassigned | Unassigned | 787_0  | Clustered           | 132 VC_787_0 | 132 | 1      | 1          | 1      | 0 | 0 | 0 |        | 1 Ref |
| JX262216 | Unassigned | Unassigned | Unassigned | 787_0  | Clustered           | 132 VC_787_0 | 132 | 1      | 1          | 1      | 0 | 0 | 0 |        | 1 Ref |
| JX262217 | Unassigned | Unassigned | Unassigned | 787_0  | Clustered           | 132 VC_787_0 | 132 | 1      | 1          | 1      | 0 | 0 | 0 |        | 1 Ref |
| JX262218 | Unassigned | Unassigned | Unassigned | 787_0  | Clustered           | 132 VC_787_0 | 132 | 1      | 1          | 1      | 0 | 0 | 0 |        | 1 Ref |
| JX262219 | Unassigned | Unassigned | Unassigned | 787_0  | Clustered           | 132 VC_787_0 | 132 | 1      | 1          | 1      | 0 | 0 | 0 |        | 1 Ref |
| JX262220 | Unassigned | Unassigned | Unassigned | 787_0  | Clustered           | 132 VC_787_0 | 132 | 1      | 1          | 1      | 0 | 0 | 0 |        | 1 Ref |
| JX262221 | Unassigned | Unassigned | Unassigned | 787_0  | Clustered           | 132 VC_787_0 | 132 | 1      | 1          | 1      | 0 | 0 | 0 |        | 1 Ref |
| JX262222 | Unassigned | Unassigned | Unassigned | 787_0  | Clustered           | 132 VC_787_0 | 132 | 1      | 1          | 1      | 0 | 0 | 0 |        | 1 Ref |
| JX262223 | Unassigned | Unassigned | Unassigned | 787_0  | Clustered           | 132 VC_787_0 | 132 | 1      | 1          | 1      | 0 | 0 | 0 |        | 1 Ref |
| JX262224 | Unassigned | Unassigned | Unassigned | 787_0  | Clustered           | 132 VC_787_0 | 132 | 1      | 1          | 1      | 0 | 0 | 0 |        | 1 Ref |
| JX262225 | Unassigned | Unassigned | Unassigned | 787_0  | Clustered           | 132 VC_787_0 | 132 | 1      | 1          | 1      | 0 | 0 | 0 |        | 1 Ref |
| JX262376 | Unassigned | Unassigned | Unassigned | 1015_1 | Clustered           | 26 VC_1015_1 | 26  | 0.6989 | 1          | 0.6989 | 0 | 0 | 0 |        | 1 Ref |
| JX274646 | Unassigned | Unassigned | Unassigned | 9_0    | Clustered           | 38 VC_9_0    | 38  | 0.4859 | 1          | 0.4859 | 0 | 0 | 0 |        | 1 Ref |
| JX274647 | Unassigned | Unassigned | Unassigned | 9_0    | Clustered           | 38 VC_9_0    | 38  | 0.4859 | 1          | 0.4859 | 0 | 0 | 0 |        | 1 Ref |
| JX290549 | Unassigned | Unassigned | Unassigned | 1018_0 | Clustered           | 38 VC_1018_0 | 38  | 0.9757 | 1          | 0.9757 | 0 | 0 | 0 |        | 1 Ref |
| JX296113 | Unassigned | Unassigned | Unassigned | 611_0  | Clustered           | 50 VC_611_0  | 50  | 0.7306 | 1          | 0.7306 | 0 | 0 | 0 |        | 1 Ref |
| JX297445 | Unassigned | Unassigned | Unassigned | 654_1  | Clustered           | 27 VC_654_1  | 27  | 0.2571 | 1          | 0.2571 | 0 | 0 | 0 | 0.9858 | Ref   |
| JX306041 | Unassigned | Unassigned | Unassigned | 619_2  | Clustered           | 10 VC_619_2  | 10  | 0.3034 | 1          | 0.3034 | 0 | 0 | 0 |        | 1 Ref |
| JX307702 | Unassigned | Unassigned | Unassigned | 535_1  | Clustered           | 108 VC_535_1 | 108 | 0.8479 | 1          | 0.8479 | 0 | 0 | 0 | 0.9955 | Ref   |
| JX307703 | Unassigned | Unassigned | Unassigned | 535_1  | Clustered           | 108 VC_535_1 | 108 | 0.8479 | 1          | 0.8479 | 0 | 0 | 0 | 0.9955 | Ref   |
| JX307704 | Unassigned | Unassigned | Unassigned | 533_0  | Clustered           | 16 VC_533_0  | 16  | 0.3765 | 1          | 0.3765 | 0 | 0 | 0 |        | 1 Ref |
| JX307705 | Unassigned | Unassigned | Unassigned | 335_37 | Clustered           | 4 VC_335_37  | 4   | 0.0112 | 0.99980442 | 0.0112 | 0 | 0 | 0 | 0.6667 | Ref   |
| JX316028 | Unassigned | Unassigned | Unassigned | 994_4  | Clustered           | 3 VC_994_4   | 3   | 0.0236 | 0.75814415 | 0.0179 | 0 | 0 | 0 |        | 1 Ref |
| JX403939 | Unassigned | Unassigned | Unassigned | 304_1  | Clustered           | 20 VC_304_1  | 20  | 0.5632 | 1          | 0.5632 | 0 | 0 | 0 | 0.7684 | Ref   |
| JX403940 | Unassigned | Unassigned | Unassigned | 441_1  | Clustered           | 8 VC_441_1   | 8   | 0.5443 | 1          | 0.5443 | 0 | 0 | 0 | 0.9643 | Ref   |
| JX411619 | Unassigned | Unassigned | Unassigned | 533_0  | Clustered           | 16 VC_533_0  | 16  | 0.3765 | 1          | 0.3765 | 0 | 0 | 0 |        | 1 Ref |
| JX412914 | Unassigned | Unassigned | Unassigned | 62_0   | Clustered           | 12 VC_62_0   | 12  | 0.7624 | 1          | 0.7624 | 0 | 0 | 0 |        | 1 Ref |
| JX415535 | Unassigned | Unassigned | Unassigned | 801_0  | Clustered           | 37 VC_801_0  | 37  | 0.5672 | 1          | 0.5672 | 0 | 0 | 0 |        | 1 Ref |
| JX415536 | Unassigned | Unassigned | Unassigned | 837_0  | Clustered           | 12 VC_837_0  | 12  | 0.2327 | 1          | 0.2327 | 0 | 0 | 0 |        | 1 Ref |
| JX421753 | Unassigned | Unassigned | Unassigned | 398_0  | Clustered           | 51 VC_398_0  | 51  | 0.8741 | 1          | 0.8741 | 0 | 0 | 0 |        | 1 Ref |
| JX434030 | Unassigned | Unassigned | Unassigned | 185_0  | Clustered           | 53 VC_185_0  | 53  | 0.9153 | 1          | 0.9153 | 0 | 0 | 0 |        | 1 Ref |
| JX434031 | Unassigned | Unassigned | Unassigned | 185_0  | Clustered           | 53 VC_185_0  | 53  | 0.9153 | 1          | 0.9153 | 0 | 0 | 0 |        | 1 Ref |
| JX434032 | Unassigned | Unassigned | Unassigned | 185_0  | Clustered           | 53 VC_185_0  | 53  | 0.9153 | 1          | 0.9153 | 0 | 0 | 0 |        | 1 Ref |
| JX434033 | Unassigned | Unassigned | Unassigned | 185_0  | Clustered           | 53 VC_185_0  | 53  | 0.9153 | 1          | 0.9153 | 0 | 0 | 0 |        | 1 Ref |
| JX442241 | Unassigned | Unassigned | Unassigned | 1002_0 | Clustered           | 10 VC_1002_0 | 10  | 0.9987 | 1          | 0.9987 | 0 | 0 | 0 |        | 1 Ref |
| JX483873 | Unassigned | Unassigned | Unassigned | 497_0  | Clustered           | 4 VC_497_0   | 4   | 0.0962 | 0.999525   | 0.0961 | 0 | 0 | 0 |        | 1 Ref |
| JX483874 | Unassigned | Unassigned | Unassigned | 1020_0 | Clustered           | 22 VC_1020_0 | 22  | 0.895  | 1          | 0.895  | 0 | 0 | 0 |        | 1 Ref |
| JX483875 | Unassigned | Unassigned | Unassigned | 1020_0 | Clustered           | 22 VC_1020_0 | 22  | 0.895  | 1          | 0.895  | 0 | 0 | 0 |        | 1 Ref |
| JX483876 | Unassigned | Unassigned | Unassigned | 980_0  | Clustered           | 11 VC_980_0  | 11  | 0.7333 | 1          | 0.7333 | 0 | 0 | 0 |        | 1 Ref |
| JX483877 | Unassigned | Unassigned | Unassigned | 980_0  | Clustered           | 11 VC_980_0  | 11  | 0.7333 | 1          | 0.7333 | 0 | 0 | 0 |        | 1 Ref |
| JX483878 | Unassigned | Unassigned | Unassigned | 980_0  | Clustered           | 11 VC_980_0  | 11  | 0.7333 | 1          | 0.7333 | 0 | 0 | 0 |        | 1 Ref |
| JX483879 | Unassigned | Unassigned | Unassigned | 1020_0 | Clustered           | 22 VC_1020_0 | 22  | 0.895  | 1          | 0.895  | 0 | 0 | 0 |        | 1 Ref |
| JX483880 | Unassigned | Unassigned | Unassigned | 1020_0 | Clustered           | 22 VC_1020_0 | 22  | 0.895  | 1          | 0.895  | 0 | 0 | 0 |        | 1 Ref |
| JX483881 | Unassigned | Unassigned | Unassigned | 739_1  | Clustered           | 6 VC_739_1   | 6   | 0.434  | 1          | 0.434  | 0 | 0 | 0 |        | 1 Ref |
| JX486087 | Unassigned | Unassigned | Unassigned | 597_0  | Clustered           | 6 VC_597_0   | 6   | 0.9222 | 0.99999993 | 0.9222 | 0 | 0 | 0 |        | 1 Ref |
| JX486088 | Unassigned | Unassigned | Unassigned | 650_1  | Clustered           | 6 VC_650_1   | 6   | 0.4186 | 1          | 0.4186 | 0 | 0 | 0 |        | 1 Ref |
| JX495041 | Unassigned | Unassigned | Unassigned | 192_0  | Clustered           | 22 VC_192_0  | 22  | 0.6582 | 1          | 0.6582 | 0 | 0 | 0 |        | 1 Ref |
| JX495042 | Unassigned | Unassigned | Unassigned | 192_0  | Clustered           | 22 VC_192_0  | 22  | 0.6582 | 1          | 0.6582 | 0 | 0 | 0 |        | 1 Ref |
| JX495043 | Unassigned | Unassigned | Unassigned | 192_0  | Clustered           | 22 VC_192_0  | 22  | 0.6582 | 1          | 0.6582 | 0 | 0 | 0 |        | 1 Ref |
| JX501340 | Unassigned | Unassigned | Unassigned | 434_0  | Clustered           | 45 VC_434_0  | 45  | 0.9479 | 1          | 0.9479 | 0 | 0 | 0 |        | 1 Ref |
| JX507079 | Unassigned | Unassigned | Unassigned | 25_0   | Clustered           | 3 VC_25_0    | 3   | 0.3393 | 0.99845192 | 0.3388 | 0 | 0 | 0 |        | 1 Ref |
| JX536493 | Unassigned | Unassigned | Unassigned | 293_14 | Clustered/Singleton | 1 VC_293_14  | 1   | 0      | 1          | 0      | 0 | 0 | 0 |        | 1 Ref |
| JX556417 | Unassigned | Unassigned | Unassigned | 24_0   | Clustered           | 3 VC_24_0    | 3   | 0.4232 | 0.9983762  | 0.4226 | 0 | 0 | 0 |        | 1 Ref |
| JX556418 | Unassigned | Unassigned | Unassigned | 911_0  | Clustered           | 20 VC_911_0  | 20  | 0.9915 | 1          | 0.9915 | 0 | 0 | 0 |        | 1 Ref |
| JX560968 | Unassigned | Unassigned | Unassigned | 340_18 | Clustered           | 7 VC_340_18  | 7   | 0.0326 | 1          | 0.0326 | 0 | 0 | 0 | 0.8095 | Ref   |
| JX561091 | Unassigned | Unassigned | Unassigned | 871_1  | Clustered           | 26 VC_871_1  | 26  | 0.6303 | 1          | 0.6303 | 0 | 0 | 0 | 0.9815 | Ref   |
| JX564242 | Unassigned | Unassigned | Unassigned | 274_0  | Clustered           | 7 VC_274_0   | 7   | 0.3401 | 1          | 0.3401 | 0 | 0 | 0 |        | 1 Ref |
| JX567312 | Unassigned | Unassigned | Unassigned | 274_0  | Clustered           | 7 VC_274_0   | 7   | 0.3401 | 1          | 0.3401 | 0 | 0 | 0 |        | 1 Ref |
| JX569801 | Unassigned | Unassigned | Unassigned | 868_0  | Clustered           | 27 VC_868_0  | 27  | 0.9372 | 1          | 0.9372 | 0 | 0 | 0 |        | 1 Ref |
| JX570702 | Unassigned | Unassigned | Unassigned | 787_0  | Clustered           | 132 VC_787_0 | 132 | 1      | 1          | 1      | 0 | 0 | 0 |        | 1 Ref |
| JX570703 | Unassigned | Unassigned | Unassigned | 787_0  | Clustered           | 132 VC_787_0 | 132 | 1      | 1          | 1      | 0 | 0 | 0 |        | 1 Ref |
| JX570704 | Unassigned | Unassigned | Unassigned | 787_0  | Clustered           | 132 VC_787_0 | 132 | 1      | 1          | 1      | 0 | 0 | 0 |        | 1 Ref |
| JX570705 | Unassigned | Unassigned | Unassigned | 787_0  | Clustered           | 132 VC_787_0 | 132 | 1      | 1          | 1      | 0 | 0 | 0 |        | 1 Ref |
| JX570706 | Unassigned | Unassigned | Unassigned | 787_0  | Clustered           | 132 VC_787_0 | 132 | 1      | 1          | 1      | 0 | 0 | 0 |        | 1 Ref |
| JX570707 | Unassigned | Unassigned | Unassigned | 787_0  | Clustered           | 132 VC_787_0 | 132 | 1      | 1          | 1      | 0 | 0 | 0 |        | 1 Ref |
| JX570708 | Unassigned | Unassigned | Unassigned | 787_0  | Clustered           | 132 VC_787_0 | 132 | 1      | 1          | 1      | 0 | 0 | 0 |        | 1 Ref |
| JX570709 | Unassigned | Unassigned | Unassigned | 787_0  | Clustered           | 132 VC_787_0 | 132 | 1      | 1          | 1      | 0 | 0 | 0 |        | 1 Ref |
| JX570710 | Unassigned | Unassigned | Unassigned | 787_0  | Clustered           | 132 VC_787_0 | 132 | 1      | 1          | 1      | 0 | 0 | 0 |        | 1 Ref |
| JX570711 | Unassigned | Unassigned | Unassigned | 787_0  | Clustered           | 132 VC_787_0 | 132 | 1      | 1          | 1      | 0 | 0 | 0 |        | 1 Ref |
| JX570712 | Unassigned | Unassigned | Unassigned | 787_0  | Clustered           | 132 VC_787_0 | 132 | 1      | 1          | 1      | 0 | 0 | 0 |        | 1 Ref |



|          |            |            |            |        |           |     |           |     |        |            |        |   |   |   |        |     |
|----------|------------|------------|------------|--------|-----------|-----|-----------|-----|--------|------------|--------|---|---|---|--------|-----|
| JX570713 | Unassigned | Unassigned | Unassigned | 787_0  | Clustered | 132 | VC_787_0  | 132 | 1      | 1          | 1      | 0 | 0 | 0 | 1      | Ref |
| JX570714 | Unassigned | Unassigned | Unassigned | 787_0  | Clustered | 132 | VC_787_0  | 132 | 1      | 1          | 1      | 0 | 0 | 0 | 1      | Ref |
| JX625144 | Unassigned | Unassigned | Unassigned | 321_0  | Clustered | 2   | VC_321_0  | 2   | 0.1773 | 0.99999983 | 0.1773 | 0 | 0 | 0 | 1      | Ref |
| JX649096 | Unassigned | Unassigned | Unassigned | 384_16 | Clustered | 42  | VC_384_16 | 42  | 0.134  | 1          | 0.134  | 0 | 0 | 0 | 0.7282 | Ref |
| JX649097 | Unassigned | Unassigned | Unassigned | 384_16 | Clustered | 42  | VC_384_16 | 42  | 0.134  | 1          | 0.134  | 0 | 0 | 0 | 0.7282 | Ref |
| JX649098 | Unassigned | Unassigned | Unassigned | 384_3  | Clustered | 22  | VC_384_3  | 22  | 0.0786 | 1          | 0.0786 | 0 | 0 | 0 | 0.9048 | Ref |
| JX649099 | Unassigned | Unassigned | Unassigned | 384_3  | Clustered | 22  | VC_384_3  | 22  | 0.0786 | 1          | 0.0786 | 0 | 0 | 0 | 0.9048 | Ref |
| JX649100 | Unassigned | Unassigned | Unassigned | 384_16 | Clustered | 42  | VC_384_16 | 42  | 0.134  | 1          | 0.134  | 0 | 0 | 0 | 0.7282 | Ref |
| JX658790 | Unassigned | Unassigned | Unassigned | 714_0  | Clustered | 71  | VC_714_0  | 71  | 0.935  | 1          | 0.935  | 0 | 0 | 0 | 1      | Ref |
| JX681814 | Unassigned | Unassigned | Unassigned | 3_0    | Clustered | 17  | VC_3_0    | 17  | 0.5615 | 1          | 0.5615 | 0 | 0 | 0 | 1      | Ref |
| JX846612 | Unassigned | Unassigned | Unassigned | 159_0  | Clustered | 25  | VC_159_0  | 25  | 0.7699 | 1          | 0.7699 | 0 | 0 | 0 | 1      | Ref |
| JX846613 | Unassigned | Unassigned | Unassigned | 159_0  | Clustered | 25  | VC_159_0  | 25  | 0.7699 | 1          | 0.7699 | 0 | 0 | 0 | 1      | Ref |
| JX863101 | Unassigned | Unassigned | Unassigned | 486_0  | Clustered | 47  | VC_486_0  | 47  | 0.9022 | 1          | 0.9022 | 0 | 0 | 0 | 1      | Ref |
| JX865427 | Unassigned | Unassigned | Unassigned | 859_0  | Clustered | 67  | VC_859_0  | 67  | 0.9622 | 1          | 0.9622 | 0 | 0 | 0 | 1      | Ref |
| JX866719 | Unassigned | Unassigned | Unassigned | 125_0  | Clustered | 23  | VC_125_0  | 23  | 0.8163 | 1          | 0.8163 | 0 | 0 | 0 | 1      | Ref |
| JX867715 | Unassigned | Unassigned | Unassigned | 837_1  | Clustered | 24  | VC_837_1  | 24  | 0.5328 | 1          | 0.5328 | 0 | 0 | 0 | 1      | Ref |
| JX872508 | Unassigned | Unassigned | Unassigned | 405_0  | Clustered | 126 | VC_405_0  | 126 | 0.9614 | 1          | 0.9614 | 0 | 0 | 0 | 1      | Ref |
| JX875065 | Unassigned | Unassigned | Unassigned | 155_8  | Clustered | 66  | VC_155_8  | 66  | 0.4537 | 1          | 0.4537 | 0 | 0 | 0 | 0.8182 | Ref |
| JX878496 | Unassigned | Unassigned | Unassigned | 134_1  | Clustered | 4   | VC_134_1  | 4   | 0.0354 | 0.99998777 | 0.0354 | 0 | 0 | 0 | 1      | Ref |
| JX878671 | Unassigned | Unassigned | Unassigned | 155_13 | Clustered | 3   | VC_155_13 | 3   | 0.0087 | 0.95130224 | 0.0083 | 0 | 0 | 0 | 1      | Ref |
| JX879087 | Unassigned | Unassigned | Unassigned | 425_0  | Clustered | 40  | VC_425_0  | 40  | 0.8399 | 1          | 0.8399 | 0 | 0 | 0 | 0.9974 | Ref |
| JX880034 | Unassigned | Unassigned | Unassigned | 801_0  | Clustered | 37  | VC_801_0  | 37  | 0.5672 | 1          | 0.5672 | 0 | 0 | 0 | 1      | Ref |
| JX880072 | Unassigned | Unassigned | Unassigned | 119_0  | Clustered | 9   | VC_119_0  | 9   | 0.9977 | 0.98988637 | 0.9876 | 0 | 0 | 0 | 1      | Ref |
| JX887877 | Unassigned | Unassigned | Unassigned | 853_0  | Clustered | 5   | VC_853_0  | 5   | 0.8735 | 0.9999832  | 0.8735 | 0 | 0 | 0 | 1      | Ref |
| JX889246 | Unassigned | Unassigned | Unassigned | 1016_0 | Clustered | 62  | VC_1016_0 | 62  | 0.8638 | 1          | 0.8638 | 0 | 0 | 0 | 0.743  | Ref |
| JX899358 | Unassigned | Unassigned | Unassigned | 223_6  | Clustered | 42  | VC_223_6  | 42  | 0.4717 | 1          | 0.4717 | 0 | 0 | 0 | 0.8351 | Ref |
| JX901189 | Unassigned | Unassigned | Unassigned | 594_0  | Clustered | 7   | VC_594_0  | 7   | 0.2725 | 1          | 0.2725 | 0 | 0 | 0 | 1      | Ref |
| JX912252 | Unassigned | Unassigned | Unassigned | 595_0  | Clustered | 35  | VC_595_0  | 35  | 0.8809 | 1          | 0.8809 | 0 | 0 | 0 | 1      | Ref |
| JX976549 | Unassigned | Unassigned | Unassigned | 713_0  | Clustered | 26  | VC_713_0  | 26  | 0.9358 | 1          | 0.9358 | 0 | 0 | 0 | 1      | Ref |
| JX997978 | Unassigned | Unassigned | Unassigned | 434_0  | Clustered | 45  | VC_434_0  | 45  | 0.9479 | 1          | 0.9479 | 0 | 0 | 0 | 1      | Ref |
| KC012913 | Unassigned | Unassigned | Unassigned | 155_8  | Clustered | 66  | VC_155_8  | 66  | 0.4537 | 1          | 0.4537 | 0 | 0 | 0 | 0.8182 | Ref |
| KC013021 | Unassigned | Unassigned | Unassigned | 888_0  | Clustered | 9   | VC_888_0  | 9   | 0.5251 | 1          | 0.5251 | 0 | 0 | 0 | 1      | Ref |
| KC013022 | Unassigned | Unassigned | Unassigned | 888_0  | Clustered | 9   | VC_888_0  | 9   | 0.5251 | 1          | 0.5251 | 0 | 0 | 0 | 1      | Ref |
| KC013023 | Unassigned | Unassigned | Unassigned | 888_0  | Clustered | 9   | VC_888_0  | 9   | 0.5251 | 1          | 0.5251 | 0 | 0 | 0 | 1      | Ref |
| KC013024 | Unassigned | Unassigned | Unassigned | 888_0  | Clustered | 9   | VC_888_0  | 9   | 0.5251 | 1          | 0.5251 | 0 | 0 | 0 | 1      | Ref |
| KC013025 | Unassigned | Unassigned | Unassigned | 888_0  | Clustered | 9   | VC_888_0  | 9   | 0.5251 | 1          | 0.5251 | 0 | 0 | 0 | 1      | Ref |
| KC013026 | Unassigned | Unassigned | Unassigned | 889_0  | Clustered | 13  | VC_889_0  | 13  | 0.6844 | 1          | 0.6844 | 0 | 0 | 0 | 1      | Ref |
| KC013027 | Unassigned | Unassigned | Unassigned | 889_0  | Clustered | 13  | VC_889_0  | 13  | 0.6844 | 1          | 0.6844 | 0 | 0 | 0 | 1      | Ref |
| KC013028 | Unassigned | Unassigned | Unassigned | 889_0  | Clustered | 13  | VC_889_0  | 13  | 0.6844 | 1          | 0.6844 | 0 | 0 | 0 | 1      | Ref |
| KC013029 | Unassigned | Unassigned | Unassigned | 889_0  | Clustered | 13  | VC_889_0  | 13  | 0.6844 | 1          | 0.6844 | 0 | 0 | 0 | 1      | Ref |
| KC107834 | Unassigned | Unassigned | Unassigned | 907_0  | Clustered | 32  | VC_907_0  | 32  | 0.9964 | 1          | 0.9964 | 0 | 0 | 0 | 1      | Ref |
| KC109329 | Unassigned | Unassigned | Unassigned | 465_0  | Clustered | 80  | VC_465_0  | 80  | 0.9988 | 1          | 0.9988 | 0 | 0 | 0 | 1      | Ref |
| KC117376 | Unassigned | Unassigned | Unassigned | 318_0  | Clustered | 6   | VC_318_0  | 6   | 0.1981 | 1          | 0.1981 | 0 | 0 | 0 | 1      | Ref |
| KC117377 | Unassigned | Unassigned | Unassigned | 320_1  | Clustered | 3   | VC_320_1  | 3   | 0.346  | 0.99812624 | 0.3454 | 0 | 0 | 0 | 1      | Ref |
| KC131021 | Unassigned | Unassigned | Unassigned | 207_0  | Clustered | 12  | VC_207_0  | 12  | 0.4465 | 1          | 0.4465 | 0 | 0 | 0 | 1      | Ref |
| KC131022 | Unassigned | Unassigned | Unassigned | 1028_0 | Clustered | 69  | VC_1028_0 | 69  | 0.8547 | 1          | 0.8547 | 0 | 0 | 0 | 1      | Ref |
| KC131023 | Unassigned | Unassigned | Unassigned | 417_0  | Clustered | 20  | VC_417_0  | 20  | 0.6581 | 1          | 0.6581 | 0 | 0 | 0 | 1      | Ref |
| KC131025 | Unassigned | Unassigned | Unassigned | 417_0  | Clustered | 20  | VC_417_0  | 20  | 0.6581 | 1          | 0.6581 | 0 | 0 | 0 | 1      | Ref |
| KC131129 | Unassigned | Unassigned | Unassigned | 549_0  | Clustered | 9   | VC_549_0  | 9   | 0.2597 | 1          | 0.2597 | 0 | 0 | 0 | 1      | Ref |
| KC139511 | Unassigned | Unassigned | Unassigned | 654_0  | Clustered | 115 | VC_654_0  | 115 | 0.7303 | 1          | 0.7303 | 0 | 0 | 0 | 0.8764 | Ref |
| KC139512 | Unassigned | Unassigned | Unassigned | 611_0  | Clustered | 50  | VC_611_0  | 50  | 0.7306 | 1          | 0.7306 | 0 | 0 | 0 | 1      | Ref |
| KC139514 | Unassigned | Unassigned | Unassigned | 611_0  | Clustered | 50  | VC_611_0  | 50  | 0.7306 | 1          | 0.7306 | 0 | 0 | 0 | 1      | Ref |
| KC139515 | Unassigned | Unassigned | Unassigned | 611_0  | Clustered | 50  | VC_611_0  | 50  | 0.7306 | 1          | 0.7306 | 0 | 0 | 0 | 1      | Ref |
| KC139517 | Unassigned | Unassigned | Unassigned | 802_0  | Clustered | 8   | VC_802_0  | 8   | 0.5141 | 1          | 0.5141 | 0 | 0 | 0 | 1      | Ref |
| KC139518 | Unassigned | Unassigned | Unassigned | 560_0  | Clustered | 15  | VC_560_0  | 15  | 0.2846 | 1          | 0.2846 | 0 | 0 | 0 | 1      | Ref |
| KC139519 | Unassigned | Unassigned | Unassigned | 611_0  | Clustered | 50  | VC_611_0  | 50  | 0.7306 | 1          | 0.7306 | 0 | 0 | 0 | 1      | Ref |
| KC139520 | Unassigned | Unassigned | Unassigned | 802_0  | Clustered | 8   | VC_802_0  | 8   | 0.5141 | 1          | 0.5141 | 0 | 0 | 0 | 1      | Ref |
| KC139521 | Unassigned | Unassigned | Unassigned | 235_0  | Clustered | 60  | VC_235_0  | 60  | 0.9413 | 1          | 0.9413 | 0 | 0 | 0 | 1      | Ref |
| KC171646 | Unassigned | Unassigned | Unassigned | 279_0  | Clustered | 11  | VC_279_0  | 11  | 0.4839 | 1          | 0.4839 | 0 | 0 | 0 | 0.8727 | Ref |
| KC171647 | Unassigned | Unassigned | Unassigned | 279_0  | Clustered | 11  | VC_279_0  | 11  | 0.4839 | 1          | 0.4839 | 0 | 0 | 0 | 0.8727 | Ref |
| KC172839 | Unassigned | Unassigned | Unassigned | 531_0  | Clustered | 32  | VC_531_0  | 32  | 0.6859 | 1          | 0.6859 | 0 | 0 | 0 | 1      | Ref |
| KC182542 | Unassigned | Unassigned | Unassigned | 210_0  | Clustered | 105 | VC_210_0  | 105 | 0.4076 | 1          | 0.4076 | 0 | 0 | 0 | 0.7766 | Ref |
| KC182543 | Unassigned | Unassigned | Unassigned | 210_0  | Clustered | 105 | VC_210_0  | 105 | 0.4076 | 1          | 0.4076 | 0 | 0 | 0 | 0.7766 | Ref |
| KC182544 | Unassigned | Unassigned | Unassigned | 210_0  | Clustered | 105 | VC_210_0  | 105 | 0.4076 | 1          | 0.4076 | 0 | 0 | 0 | 0.7766 | Ref |
| KC182545 | Unassigned | Unassigned | Unassigned | 210_0  | Clustered | 105 | VC_210_0  | 105 | 0.4076 | 1          | 0.4076 | 0 | 0 | 0 | 0.7766 | Ref |
| KC182546 | Unassigned | Unassigned | Unassigned | 210_0  | Clustered | 105 | VC_210_0  | 105 | 0.4076 | 1          | 0.4076 | 0 | 0 | 0 | 0.7766 | Ref |
| KC182547 | Unassigned | Unassigned | Unassigned | 210_0  | Clustered | 105 | VC_210_0  | 105 | 0.4076 | 1          | 0.4076 | 0 | 0 | 0 | 0.7766 | Ref |
| KC182548 | Unassigned | Unassigned | Unassigned | 210_0  | Clustered | 105 | VC_210_0  | 105 | 0.4076 | 1          | 0.4076 | 0 | 0 | 0 | 0.7766 | Ref |
| KC182549 | Unassigned | Unassigned | Unassigned | 210_0  | Clustered | 105 | VC_210_0  | 105 | 0.4076 | 1          | 0.4076 | 0 | 0 | 0 | 0.7766 | Ref |
| KC182550 | Unassigned | Unassigned | Unassigned | 210_0  | Clustered | 105 | VC_210_0  | 105 | 0.4076 | 1          | 0.4076 | 0 | 0 | 0 | 0.7766 | Ref |
| KC182551 | Unassigned | Unassigned | Unassigned | 210_0  | Clustered | 105 | VC_210_0  | 105 | 0.4076 | 1          | 0.4076 | 0 | 0 | 0 | 0.7766 | Ref |
| KC182552 | Unassigned | Unassigned | Unassigned | 210_0  | Clustered | 105 | VC_210_0  | 105 | 0.4076 | 1          | 0.4076 | 0 | 0 | 0 | 0.7766 | Ref |
| KC206276 | Unassigned | Unassigned | Unassigned | 801_0  | Clustered | 37  | VC_801_0  | 37  | 0.5672 | 1          | 0.5672 | 0 | 0 | 0 | 1      | Ref |
| KC237308 | Unassigned | Unassigned | Unassigned | 375_0  | Clustered | 2   | VC_375_0  | 2   | 0.002  | 0.83307735 | 0.0017 | 0 | 0 | 0 | 1      | Ref |
| KC252997 | Unassigned | Unassigned | Unassigned | 684_0  | Clustered | 4   | VC_684_0  | 4   | 1      | 1          | 1      | 0 | 0 | 0 | 1      | Ref |
| KC262634 | Unassigned | Unassigned | Unassigned | 645_0  | Clustered | 20  | VC_645_0  | 20  | 0.8502 | 1          | 0.8502 | 0 | 0 | 0 | 1      | Ref |
| KC292020 | Unassigned | Unassigned | Unassigned | 317_0  | Clustered | 33  | VC_317_0  | 33  | 0.8756 | 1          | 0.8756 | 0 | 0 | 0 | 1      | Ref |
| KC292021 | Unassigned | Unassigned | Unassigned | 318_0  | Clustered | 6   | VC_318_0  | 6   | 0.1981 | 1          | 0.1981 | 0 | 0 | 0 | 1      | Ref |
| KC292022 | Unassigned | Unassigned | Unassigned | 317_0  | Clustered | 33  | VC_317_0  | 33  | 0.8756 | 1          | 0.8756 | 0 | 0 | 0 | 1      | Ref |
| KC292023 | Unassigned | Unassigned | Unassigned | 473_0  | Clustered | 3   | VC_473_0  | 3   | 0.8515 | 0.99054823 | 0.8434 | 0 | 0 | 0 | 1      | Ref |
| KC292024 | Unassigned | Unassigned | Unassigned | 1024_0 | Clustered | 2   | VC_1024_0 | 2   | 0.3738 | 0.91418477 | 0.3417 | 0 | 0 | 0 | 1      | Ref |



|          |            |            |            |        |                     |              |     |        |            |        |   |   |   |            |
|----------|------------|------------|------------|--------|---------------------|--------------|-----|--------|------------|--------|---|---|---|------------|
| KC292026 | Unassigned | Unassigned | Unassigned | 319_0  | Clustered           | 2 VC_319_0   | 2   | 0.0304 | 0.95436427 | 0.029  | 0 | 0 | 0 | 1 Ref      |
| KC292027 | Unassigned | Unassigned | Unassigned | 320_1  | Clustered           | 3 VC_320_1   | 3   | 0.346  | 0.99812624 | 0.3454 | 0 | 0 | 0 | 1 Ref      |
| KC292028 | Unassigned | Unassigned | Unassigned | 1024_0 | Clustered           | 2 VC_1024_0  | 2   | 0.3738 | 0.91418477 | 0.3417 | 0 | 0 | 0 | 1 Ref      |
| KC292029 | Unassigned | Unassigned | Unassigned | 320_0  | Clustered           | 2 VC_320_0   | 2   | 0.1705 | 0.90744399 | 0.1547 | 0 | 0 | 0 | 1 Ref      |
| KC294142 | Unassigned | Unassigned | Unassigned | 486_0  | Clustered           | 47 VC_486_0  | 47  | 0.9022 | 1          | 0.9022 | 0 | 0 | 0 | 1 Ref      |
| KC295538 | Unassigned | Unassigned | Unassigned | 170_11 | Clustered           | 10 VC_170_11 | 10  | 0.1502 | 0.99999797 | 0.1502 | 0 | 0 | 0 | 0.9111 Ref |
| KC310802 | Unassigned | Unassigned | Unassigned | 352_0  | Clustered           | 31 VC_352_0  | 31  | 0.9547 | 1          | 0.9547 | 0 | 0 | 0 | 1 Ref      |
| KC310803 | Unassigned | Unassigned | Unassigned | 352_0  | Clustered           | 31 VC_352_0  | 31  | 0.9547 | 1          | 0.9547 | 0 | 0 | 0 | 1 Ref      |
| KC310804 | Unassigned | Unassigned | Unassigned | 352_0  | Clustered           | 31 VC_352_0  | 31  | 0.9547 | 1          | 0.9547 | 0 | 0 | 0 | 1 Ref      |
| KC310805 | Unassigned | Unassigned | Unassigned | 352_0  | Clustered           | 31 VC_352_0  | 31  | 0.9547 | 1          | 0.9547 | 0 | 0 | 0 | 1 Ref      |
| KC310806 | Unassigned | Unassigned | Unassigned | 352_0  | Clustered           | 31 VC_352_0  | 31  | 0.9547 | 1          | 0.9547 | 0 | 0 | 0 | 1 Ref      |
| KC311669 | Unassigned | Unassigned | Unassigned | 714_0  | Clustered           | 71 VC_714_0  | 71  | 0.935  | 1          | 0.935  | 0 | 0 | 0 | 1 Ref      |
| KC330679 | Unassigned | Unassigned | Unassigned | 102_0  | Clustered           | 15 VC_102_0  | 15  | 0.653  | 1          | 0.653  | 0 | 0 | 0 | 1 Ref      |
| KC330680 | Unassigned | Unassigned | Unassigned | 102_0  | Clustered           | 15 VC_102_0  | 15  | 0.653  | 1          | 0.653  | 0 | 0 | 0 | 1 Ref      |
| KC330681 | Unassigned | Unassigned | Unassigned | 102_0  | Clustered           | 15 VC_102_0  | 15  | 0.653  | 1          | 0.653  | 0 | 0 | 0 | 1 Ref      |
| KC330682 | Unassigned | Unassigned | Unassigned | 102_0  | Clustered           | 15 VC_102_0  | 15  | 0.653  | 1          | 0.653  | 0 | 0 | 0 | 1 Ref      |
| KC330683 | Unassigned | Unassigned | Unassigned | 102_0  | Clustered           | 15 VC_102_0  | 15  | 0.653  | 1          | 0.653  | 0 | 0 | 0 | 1 Ref      |
| KC330684 | Unassigned | Unassigned | Unassigned | 102_0  | Clustered           | 15 VC_102_0  | 15  | 0.653  | 1          | 0.653  | 0 | 0 | 0 | 1 Ref      |
| KC333879 | Unassigned | Unassigned | Unassigned | 469_0  | Clustered           | 18 VC_469_0  | 18  | 0.4583 | 1          | 0.4583 | 0 | 0 | 0 | 1 Ref      |
| KC342645 | Unassigned | Unassigned | Unassigned | 7_0    | Clustered           | 28 VC_7_0    | 28  | 0.389  | 1          | 0.389  | 0 | 0 | 0 | 0.9947 Ref |
| KC348600 | Unassigned | Unassigned | Unassigned | 268_1  | Clustered           | 20 VC_268_1  | 20  | 0.1906 | 1          | 0.1906 | 0 | 0 | 0 | 0.6789 Ref |
| KC348601 | Unassigned | Unassigned | Unassigned | 268_1  | Clustered           | 20 VC_268_1  | 20  | 0.1906 | 1          | 0.1906 | 0 | 0 | 0 | 0.6789 Ref |
| KC348602 | Unassigned | Unassigned | Unassigned | 268_1  | Clustered           | 20 VC_268_1  | 20  | 0.1906 | 1          | 0.1906 | 0 | 0 | 0 | 0.6789 Ref |
| KC348603 | Unassigned | Unassigned | Unassigned | 647_0  | Clustered           | 37 VC_647_0  | 37  | 0.5847 | 1          | 0.5847 | 0 | 0 | 0 | 0.9234 Ref |
| KC357596 | Unassigned | Unassigned | Unassigned | 0_0    | Clustered           | 3 VC_0_0     | 3   | 1      | 1          | 1      | 0 | 0 | 0 | 1 Ref      |
| KC413988 | Unassigned | Unassigned | Unassigned | 425_0  | Clustered           | 40 VC_425_0  | 40  | 0.8399 | 1          | 0.8399 | 0 | 0 | 0 | 0.9974 Ref |
| KC430106 | Unassigned | Unassigned | Unassigned | 913_1  | Clustered           | 8 VC_913_1   | 8   | 0.1102 | 0.9989323  | 0.11   | 0 | 0 | 0 | 0.75 Ref   |
| KC438282 | Unassigned | Unassigned | Unassigned | 806_0  | Clustered           | 6 VC_806_0   | 6   | 0.5468 | 1          | 0.5468 | 0 | 0 | 0 | 1 Ref      |
| KC438283 | Unassigned | Unassigned | Unassigned | 806_0  | Clustered           | 6 VC_806_0   | 6   | 0.5468 | 1          | 0.5468 | 0 | 0 | 0 | 1 Ref      |
| KC465898 | Unassigned | Unassigned | Unassigned | 502_0  | Clustered           | 18 VC_502_0  | 18  | 0.8808 | 1          | 0.8808 | 0 | 0 | 0 | 1 Ref      |
| KC465901 | Unassigned | Unassigned | Unassigned | 496_0  | Clustered           | 22 VC_496_0  | 22  | 0.6101 | 1          | 0.6101 | 0 | 0 | 0 | 1 Ref      |
| KC481682 | Unassigned | Unassigned | Unassigned | 489_2  | Clustered           | 3 VC_489_2   | 3   | 0.0584 | 0.98697745 | 0.0577 | 0 | 0 | 0 | 1 Ref      |
| KC522412 | Unassigned | Unassigned | Unassigned | 210_0  | Clustered           | 105 VC_210_0 | 105 | 0.4076 | 1          | 0.4076 | 0 | 0 | 0 | 0.7766 Ref |
| KC542353 | Unassigned | Unassigned | Unassigned | 663_0  | Clustered           | 5 VC_663_0   | 5   | 0.6645 | 0.99999974 | 0.6645 | 0 | 0 | 0 | 1 Ref      |
| KC556893 | Unassigned | Unassigned | Unassigned | 908_0  | Clustered           | 36 VC_908_0  | 36  | 0.9943 | 1          | 0.9943 | 0 | 0 | 0 | 1 Ref      |
| KC556894 | Unassigned | Unassigned | Unassigned | 908_0  | Clustered           | 36 VC_908_0  | 36  | 0.9943 | 1          | 0.9943 | 0 | 0 | 0 | 1 Ref      |
| KC556895 | Unassigned | Unassigned | Unassigned | 908_0  | Clustered           | 36 VC_908_0  | 36  | 0.9943 | 1          | 0.9943 | 0 | 0 | 0 | 1 Ref      |
| KC556896 | Unassigned | Unassigned | Unassigned | 908_0  | Clustered           | 36 VC_908_0  | 36  | 0.9943 | 1          | 0.9943 | 0 | 0 | 0 | 1 Ref      |
| KC556897 | Unassigned | Unassigned | Unassigned | 908_0  | Clustered           | 36 VC_908_0  | 36  | 0.9943 | 1          | 0.9943 | 0 | 0 | 0 | 1 Ref      |
| KC556898 | Unassigned | Unassigned | Unassigned | 908_0  | Clustered           | 36 VC_908_0  | 36  | 0.9943 | 1          | 0.9943 | 0 | 0 | 0 | 1 Ref      |
| KC576783 | Unassigned | Unassigned | Unassigned | 539_0  | Clustered           | 37 VC_539_0  | 37  | 0.911  | 1          | 0.911  | 0 | 0 | 0 | 1 Ref      |
| KC576784 | Unassigned | Unassigned | Unassigned | 384_2  | Clustered           | 8 VC_384_2   | 8   | 0.0232 | 1          | 0.0232 | 0 | 0 | 0 | 0.8571 Ref |
| KC579452 | Unassigned | Unassigned | Unassigned | 469_0  | Clustered           | 18 VC_469_0  | 18  | 0.4583 | 1          | 0.4583 | 0 | 0 | 0 | 1 Ref      |
| KC581799 | Unassigned | Unassigned | Unassigned | 647_0  | Clustered           | 37 VC_647_0  | 37  | 0.5847 | 1          | 0.5847 | 0 | 0 | 0 | 0.9234 Ref |
| KC595278 | Unassigned | Unassigned | Unassigned | 10_0   | Clustered           | 25 VC_10_0   | 25  | 0.3437 | 1          | 0.3437 | 0 | 0 | 0 | 0.9733 Ref |
| KC595279 | Unassigned | Unassigned | Unassigned | 12_2   | Clustered           | 19 VC_12_2   | 19  | 0.2009 | 1          | 0.2009 | 0 | 0 | 0 | 1 Ref      |
| KC595511 | Unassigned | Unassigned | Unassigned | 1042_0 | Clustered           | 8 VC_1042_0  | 8   | 0.7385 | 1          | 0.7385 | 0 | 0 | 0 | 1 Ref      |
| KC595512 | Unassigned | Unassigned | Unassigned | 89_1   | Clustered           | 3 VC_89_1    | 3   | 0.1616 | 0.99777924 | 0.1612 | 0 | 0 | 0 | 1 Ref      |
| KC595513 | Unassigned | Unassigned | Unassigned | 89_1   | Clustered           | 3 VC_89_1    | 3   | 0.1616 | 0.99777924 | 0.1612 | 0 | 0 | 0 | 1 Ref      |
| KC595514 | Unassigned | Unassigned | Unassigned | 142_0  | Clustered           | 6 VC_142_0   | 6   | 0.7366 | 1          | 0.7366 | 0 | 0 | 0 | 1 Ref      |
| KC595515 | Unassigned | Unassigned | Unassigned | 142_0  | Clustered           | 6 VC_142_0   | 6   | 0.7366 | 1          | 0.7366 | 0 | 0 | 0 | 1 Ref      |
| KC595517 | Unassigned | Unassigned | Unassigned | 142_0  | Clustered           | 6 VC_142_0   | 6   | 0.7366 | 1          | 0.7366 | 0 | 0 | 0 | 1 Ref      |
| KC595518 | Unassigned | Unassigned | Unassigned | 142_0  | Clustered           | 6 VC_142_0   | 6   | 0.7366 | 1          | 0.7366 | 0 | 0 | 0 | 1 Ref      |
| KC618326 | Unassigned | Unassigned | Unassigned | 235_0  | Clustered           | 60 VC_235_0  | 60  | 0.9413 | 1          | 0.9413 | 0 | 0 | 0 | 1 Ref      |
| KC618393 | Unassigned | Unassigned | Unassigned | 618_0  | Clustered           | 50 VC_618_0  | 50  | 0.9989 | 1          | 0.9989 | 0 | 0 | 0 | 1 Ref      |
| KC661271 | Unassigned | Unassigned | Unassigned | 535_1  | Clustered           | 108 VC_535_1 | 108 | 0.8479 | 1          | 0.8479 | 0 | 0 | 0 | 0.9955 Ref |
| KC661272 | Unassigned | Unassigned | Unassigned | 532_0  | Clustered           | 75 VC_532_0  | 75  | 0.9393 | 1          | 0.9393 | 0 | 0 | 0 | 1 Ref      |
| KC661273 | Unassigned | Unassigned | Unassigned | 335_23 | Clustered           | 17 VC_335_23 | 17  | 0.0714 | 1          | 0.0714 | 0 | 0 | 0 | 0.6397 Ref |
| KC661274 | Unassigned | Unassigned | Unassigned | 384_3  | Clustered           | 22 VC_384_3  | 22  | 0.0786 | 1          | 0.0786 | 0 | 0 | 0 | 0.9048 Ref |
| KC661275 | Unassigned | Unassigned | Unassigned | 226_0  | Clustered           | 5 VC_226_0   | 5   | 0.0793 | 0.99999998 | 0.0793 | 0 | 0 | 0 | 1 Ref      |
| KC661276 | Unassigned | Unassigned | Unassigned | 917_0  | Clustered           | 28 VC_917_0  | 28  | 0.5465 | 1          | 0.5465 | 0 | 0 | 0 | 1 Ref      |
| KC661277 | Unassigned | Unassigned | Unassigned | 571_7  | Clustered           | 28 VC_571_7  | 28  | 0.1651 | 1          | 0.1651 | 0 | 0 | 0 | 0.8519 Ref |
| KC661278 | Unassigned | Unassigned | Unassigned | 538_79 | Clustered/Singleton | 1 VC_538_79  | 1   | 0      | 1          | 0      | 0 | 0 | 0 | 1 Ref      |
| KC661279 | Unassigned | Unassigned | Unassigned | 533_0  | Clustered           | 16 VC_533_0  | 16  | 0.3765 | 1          | 0.3765 | 0 | 0 | 0 | 1 Ref      |
| KC661280 | Unassigned | Unassigned | Unassigned | 538_70 | Clustered/Singleton | 1 VC_538_70  | 1   | 0      | 1          | 0      | 0 | 0 | 0 | 1 Ref      |
| KC661281 | Unassigned | Unassigned | Unassigned | 532_0  | Clustered           | 75 VC_532_0  | 75  | 0.9393 | 1          | 0.9393 | 0 | 0 | 0 | 1 Ref      |
| KC677662 | Unassigned | Unassigned | Unassigned | 611_0  | Clustered           | 50 VC_611_0  | 50  | 0.7306 | 1          | 0.7306 | 0 | 0 | 0 | 1 Ref      |
| KC677663 | Unassigned | Unassigned | Unassigned | 9_0    | Clustered           | 38 VC_9_0    | 38  | 0.4859 | 1          | 0.4859 | 0 | 0 | 0 | 1 Ref      |
| KC685370 | Unassigned | Unassigned | Unassigned | 843_0  | Clustered           | 20 VC_843_0  | 20  | 0.9621 | 1          | 0.9621 | 0 | 0 | 0 | 1 Ref      |
| KC690136 | Unassigned | Unassigned | Unassigned | 794_15 | Clustered           | 5 VC_794_15  | 5   | 0.0243 | 0.76144861 | 0.0185 | 0 | 0 | 0 | 0.9 Ref    |
| KC691254 | Unassigned | Unassigned | Unassigned | 917_0  | Clustered           | 28 VC_917_0  | 28  | 0.5465 | 1          | 0.5465 | 0 | 0 | 0 | 1 Ref      |
| KC691255 | Unassigned | Unassigned | Unassigned | 571_7  | Clustered           | 28 VC_571_7  | 28  | 0.1651 | 1          | 0.1651 | 0 | 0 | 0 | 0.8519 Ref |
| KC691256 | Unassigned | Unassigned | Unassigned | 537_0  | Clustered           | 39 VC_537_0  | 39  | 0.8148 | 1          | 0.8148 | 0 | 0 | 0 | 1 Ref      |
| KC691257 | Unassigned | Unassigned | Unassigned | 579_5  | Clustered/Singleton | 1 VC_579_5   | 1   | 0      | 1          | 0      | 0 | 0 | 0 | 1 Ref      |
| KC691258 | Unassigned | Unassigned | Unassigned | 384_3  | Clustered           | 22 VC_384_3  | 22  | 0.0786 | 1          | 0.0786 | 0 | 0 | 0 | 0.9048 Ref |
| KC699836 | Unassigned | Unassigned | Unassigned | 87_2   | Clustered           | 3 VC_87_2    | 3   | 0.033  | 0.99732979 | 0.0329 | 0 | 0 | 0 | 1 Ref      |
| KC700556 | Unassigned | Unassigned | Unassigned | 1016_0 | Clustered           | 62 VC_1016_0 | 62  | 0.8638 | 1          | 0.8638 | 0 | 0 | 0 | 0.743 Ref  |
| KC700557 | Unassigned | Unassigned | Unassigned | 1016_0 | Clustered           | 62 VC_1016_0 | 62  | 0.8638 | 1          | 0.8638 | 0 | 0 | 0 | 0.743 Ref  |
| KC700558 | Unassigned | Unassigned | Unassigned | 1016_0 | Clustered           | 62 VC_1016_0 | 62  | 0.8638 | 1          | 0.8638 | 0 | 0 | 0 | 0.743 Ref  |
| KC701493 | Unassigned | Unassigned | Unassigned | 335_17 | Clustered/Singleton | 1 VC_335_17  | 1   | 0      | 1          | 0      | 0 | 0 | 0 | 1 Ref      |
| KC710998 | Unassigned | Unassigned | Unassigned | 975_0  | Clustered           | 40 VC_975_0  | 40  | 0.6888 | 1          | 0.6888 | 0 | 0 | 0 | 1 Ref      |



|          |            |            |            |        |                     |    |           |    |        |            |        |   |   |   |   |        |     |
|----------|------------|------------|------------|--------|---------------------|----|-----------|----|--------|------------|--------|---|---|---|---|--------|-----|
| KC736071 | Unassigned | Unassigned | Unassigned | 538_52 | Clustered/Singleton | 1  | VC_538_52 | 1  | 0      | 1          | 0      | 0 | 0 | 0 | 1 | Ref    |     |
| KC736978 | Unassigned | Unassigned | Unassigned | 47_0   | Clustered           | 12 | VC_47_0   | 12 | 0.3571 | 1          | 0.3571 | 0 | 0 | 0 | 0 | 1      | Ref |
| KC748968 | Unassigned | Unassigned | Unassigned | 579_49 | Clustered           | 7  | VC_579_49 | 7  | 0.0194 | 0.98914431 | 0.0191 | 0 | 0 | 0 | 0 | 0.8571 | Ref |
| KC748969 | Unassigned | Unassigned | Unassigned | 571_8  | Clustered           | 19 | VC_571_8  | 19 | 0.1031 | 1          | 0.1031 | 0 | 0 | 0 | 0 | 0.8713 | Ref |
| KC748970 | Unassigned | Unassigned | Unassigned | 579_12 | Clustered           | 3  | VC_579_12 | 3  | 0.0064 | 0.86841267 | 0.0056 | 0 | 0 | 0 | 0 | 1      | Ref |
| KC748971 | Unassigned | Unassigned | Unassigned | 571_7  | Clustered           | 28 | VC_571_7  | 28 | 0.1651 | 1          | 0.1651 | 0 | 0 | 0 | 0 | 0.8519 | Ref |
| KC751414 | Unassigned | Unassigned | Unassigned | 773_0  | Clustered           | 2  | VC_773_0  | 2  | 0.1621 | 0.95427014 | 0.1547 | 0 | 0 | 0 | 0 | 1      | Ref |
| KC758116 | Unassigned | Unassigned | Unassigned | 172_0  | Clustered           | 26 | VC_172_0  | 26 | 0.7909 | 1          | 0.7909 | 0 | 0 | 0 | 0 | 1      | Ref |
| KC787102 | Unassigned | Unassigned | Unassigned | 222_1  | Clustered           | 19 | VC_222_1  | 19 | 0.4166 | 1          | 0.4166 | 0 | 0 | 0 | 0 | 1      | Ref |
| KC787103 | Unassigned | Unassigned | Unassigned | 783_0  | Clustered           | 67 | VC_783_0  | 67 | 0.8945 | 1          | 0.8945 | 0 | 0 | 0 | 0 | 1      | Ref |
| KC787104 | Unassigned | Unassigned | Unassigned | 783_0  | Clustered           | 67 | VC_783_0  | 67 | 0.8945 | 1          | 0.8945 | 0 | 0 | 0 | 0 | 1      | Ref |
| KC787105 | Unassigned | Unassigned | Unassigned | 222_1  | Clustered           | 19 | VC_222_1  | 19 | 0.4166 | 1          | 0.4166 | 0 | 0 | 0 | 0 | 1      | Ref |
| KC787106 | Unassigned | Unassigned | Unassigned | 222_1  | Clustered           | 19 | VC_222_1  | 19 | 0.4166 | 1          | 0.4166 | 0 | 0 | 0 | 0 | 1      | Ref |
| KC787107 | Unassigned | Unassigned | Unassigned | 783_0  | Clustered           | 67 | VC_783_0  | 67 | 0.8945 | 1          | 0.8945 | 0 | 0 | 0 | 0 | 1      | Ref |
| KC787108 | Unassigned | Unassigned | Unassigned | 783_0  | Clustered           | 67 | VC_783_0  | 67 | 0.8945 | 1          | 0.8945 | 0 | 0 | 0 | 0 | 1      | Ref |
| KC787109 | Unassigned | Unassigned | Unassigned | 783_0  | Clustered           | 67 | VC_783_0  | 67 | 0.8945 | 1          | 0.8945 | 0 | 0 | 0 | 0 | 1      | Ref |
| KC787110 | Unassigned | Unassigned | Unassigned | 783_0  | Clustered           | 67 | VC_783_0  | 67 | 0.8945 | 1          | 0.8945 | 0 | 0 | 0 | 0 | 1      | Ref |
| KC787111 | Unassigned | Unassigned | Unassigned | 783_0  | Clustered           | 67 | VC_783_0  | 67 | 0.8945 | 1          | 0.8945 | 0 | 0 | 0 | 0 | 1      | Ref |
| KC787112 | Unassigned | Unassigned | Unassigned | 783_0  | Clustered           | 67 | VC_783_0  | 67 | 0.8945 | 1          | 0.8945 | 0 | 0 | 0 | 0 | 1      | Ref |
| KC801932 | Unassigned | Unassigned | Unassigned | 687_1  | Clustered           | 10 | VC_687_1  | 10 | 0.1263 | 1          | 0.1263 | 0 | 0 | 0 | 0 | 0.9778 | Ref |
| KC814930 | Unassigned | Unassigned | Unassigned | 47_0   | Clustered           | 12 | VC_47_0   | 12 | 0.3571 | 1          | 0.3571 | 0 | 0 | 0 | 0 | 1      | Ref |
| KC821604 | Unassigned | Unassigned | Unassigned | 962_0  | Clustered           | 4  | VC_962_0  | 4  | 0.7703 | 0.999902   | 0.7702 | 0 | 0 | 0 | 0 | 1      | Ref |
| KC821606 | Unassigned | Unassigned | Unassigned | 1047_0 | Clustered           | 9  | VC_1047_0 | 9  | 1      | 1          | 1      | 0 | 0 | 0 | 0 | 1      | Ref |
| KC821607 | Unassigned | Unassigned | Unassigned | 459_1  | Clustered           | 2  | VC_459_1  | 2  | 0.1281 | 0.93226714 | 0.1194 | 0 | 0 | 0 | 0 | 1      | Ref |
| KC821608 | Unassigned | Unassigned | Unassigned | 1048_0 | Clustered           | 4  | VC_1048_0 | 4  | 0.8643 | 0.99995392 | 0.8643 | 0 | 0 | 0 | 0 | 1      | Ref |
| KC821609 | Unassigned | Unassigned | Unassigned | 1053_0 | Clustered           | 5  | VC_1053_0 | 5  | 0.9327 | 0.9999997  | 0.9327 | 0 | 0 | 0 | 0 | 1      | Ref |
| KC821610 | Unassigned | Unassigned | Unassigned | 943_0  | Clustered           | 6  | VC_943_0  | 6  | 0.277  | 1          | 0.277  | 0 | 0 | 0 | 0 | 1      | Ref |
| KC821612 | Unassigned | Unassigned | Unassigned | 1057_0 | Clustered           | 5  | VC_1057_0 | 5  | 0.8612 | 0.99999999 | 0.8612 | 0 | 0 | 0 | 0 | 1      | Ref |
| KC821613 | Unassigned | Unassigned | Unassigned | 1058_0 | Clustered           | 5  | VC_1058_0 | 5  | 0.8248 | 0.9999997  | 0.8248 | 0 | 0 | 0 | 0 | 1      | Ref |
| KC821614 | Unassigned | Unassigned | Unassigned | 1057_0 | Clustered           | 5  | VC_1057_0 | 5  | 0.8612 | 0.99999999 | 0.8612 | 0 | 0 | 0 | 0 | 1      | Ref |
| KC821615 | Unassigned | Unassigned | Unassigned | 1058_0 | Clustered           | 5  | VC_1058_0 | 5  | 0.8248 | 0.9999997  | 0.8248 | 0 | 0 | 0 | 0 | 1      | Ref |
| KC821616 | Unassigned | Unassigned | Unassigned | 943_0  | Clustered           | 6  | VC_943_0  | 6  | 0.277  | 1          | 0.277  | 0 | 0 | 0 | 0 | 1      | Ref |
| KC821617 | Unassigned | Unassigned | Unassigned | 1058_0 | Clustered           | 5  | VC_1058_0 | 5  | 0.8248 | 0.9999997  | 0.8248 | 0 | 0 | 0 | 0 | 1      | Ref |
| KC821618 | Unassigned | Unassigned | Unassigned | 459_1  | Clustered           | 2  | VC_459_1  | 2  | 0.1281 | 0.93226714 | 0.1194 | 0 | 0 | 0 | 0 | 1      | Ref |
| KC821619 | Unassigned | Unassigned | Unassigned | 1058_0 | Clustered           | 5  | VC_1058_0 | 5  | 0.8248 | 0.9999997  | 0.8248 | 0 | 0 | 0 | 0 | 1      | Ref |
| KC821620 | Unassigned | Unassigned | Unassigned | 1048_0 | Clustered           | 4  | VC_1048_0 | 4  | 0.8643 | 0.99995392 | 0.8643 | 0 | 0 | 0 | 0 | 1      | Ref |
| KC821621 | Unassigned | Unassigned | Unassigned | 962_0  | Clustered           | 4  | VC_962_0  | 4  | 0.7703 | 0.999902   | 0.7702 | 0 | 0 | 0 | 0 | 1      | Ref |
| KC821622 | Unassigned | Unassigned | Unassigned | 1048_0 | Clustered           | 4  | VC_1048_0 | 4  | 0.8643 | 0.99995392 | 0.8643 | 0 | 0 | 0 | 0 | 1      | Ref |
| KC821623 | Unassigned | Unassigned | Unassigned | 1047_0 | Clustered           | 9  | VC_1047_0 | 9  | 1      | 1          | 1      | 0 | 0 | 0 | 0 | 1      | Ref |
| KC821625 | Unassigned | Unassigned | Unassigned | 962_0  | Clustered           | 4  | VC_962_0  | 4  | 0.7703 | 0.999902   | 0.7702 | 0 | 0 | 0 | 0 | 1      | Ref |
| KC821627 | Unassigned | Unassigned | Unassigned | 1058_0 | Clustered           | 5  | VC_1058_0 | 5  | 0.8248 | 0.9999997  | 0.8248 | 0 | 0 | 0 | 0 | 1      | Ref |
| KC821628 | Unassigned | Unassigned | Unassigned | 1047_0 | Clustered           | 9  | VC_1047_0 | 9  | 1      | 1          | 1      | 0 | 0 | 0 | 0 | 1      | Ref |
| KC821629 | Unassigned | Unassigned | Unassigned | 943_0  | Clustered           | 6  | VC_943_0  | 6  | 0.277  | 1          | 0.277  | 0 | 0 | 0 | 0 | 1      | Ref |
| KC821630 | Unassigned | Unassigned | Unassigned | 943_0  | Clustered           | 6  | VC_943_0  | 6  | 0.277  | 1          | 0.277  | 0 | 0 | 0 | 0 | 1      | Ref |
| KC821631 | Unassigned | Unassigned | Unassigned | 1047_0 | Clustered           | 9  | VC_1047_0 | 9  | 1      | 1          | 1      | 0 | 0 | 0 | 0 | 1      | Ref |
| KC821632 | Unassigned | Unassigned | Unassigned | 1053_0 | Clustered           | 5  | VC_1053_0 | 5  | 0.9327 | 0.9999997  | 0.9327 | 0 | 0 | 0 | 0 | 1      | Ref |
| KC821633 | Unassigned | Unassigned | Unassigned | 1048_0 | Clustered           | 4  | VC_1048_0 | 4  | 0.8643 | 0.99995392 | 0.8643 | 0 | 0 | 0 | 0 | 1      | Ref |
| KC821634 | Unassigned | Unassigned | Unassigned | 943_0  | Clustered           | 6  | VC_943_0  | 6  | 0.277  | 1          | 0.277  | 0 | 0 | 0 | 0 | 1      | Ref |
| KC853746 | Unassigned | Unassigned | Unassigned | 71_0   | Clustered           | 27 | VC_71_0   | 27 | 0.5964 | 1          | 0.5964 | 0 | 0 | 0 | 0 | 0.9943 | Ref |
| KC862295 | Unassigned | Unassigned | Unassigned | 78_0   | Clustered           | 20 | VC_78_0   | 20 | 0.9639 | 1          | 0.9639 | 0 | 0 | 0 | 0 | 1      | Ref |
| KC862296 | Unassigned | Unassigned | Unassigned | 78_0   | Clustered           | 20 | VC_78_0   | 20 | 0.9639 | 1          | 0.9639 | 0 | 0 | 0 | 0 | 1      | Ref |
| KC862297 | Unassigned | Unassigned | Unassigned | 77_0   | Clustered           | 37 | VC_77_0   | 37 | 0.9392 | 1          | 0.9392 | 0 | 0 | 0 | 0 | 1      | Ref |
| KC862298 | Unassigned | Unassigned | Unassigned | 77_0   | Clustered           | 37 | VC_77_0   | 37 | 0.9392 | 1          | 0.9392 | 0 | 0 | 0 | 0 | 1      | Ref |
| KC862299 | Unassigned | Unassigned | Unassigned | 78_0   | Clustered           | 20 | VC_78_0   | 20 | 0.9639 | 1          | 0.9639 | 0 | 0 | 0 | 0 | 1      | Ref |
| KC862300 | Unassigned | Unassigned | Unassigned | 77_0   | Clustered           | 37 | VC_77_0   | 37 | 0.9392 | 1          | 0.9392 | 0 | 0 | 0 | 0 | 1      | Ref |
| KC862301 | Unassigned | Unassigned | Unassigned | 78_0   | Clustered           | 20 | VC_78_0   | 20 | 0.9639 | 1          | 0.9639 | 0 | 0 | 0 | 0 | 1      | Ref |
| KC900378 | Unassigned | Unassigned | Unassigned | 645_0  | Clustered           | 20 | VC_645_0  | 20 | 0.8502 | 1          | 0.8502 | 0 | 0 | 0 | 0 | 1      | Ref |
| KC900379 | Unassigned | Unassigned | Unassigned | 785_1  | Clustered           | 9  | VC_785_1  | 9  | 0.3679 | 1          | 0.3679 | 0 | 0 | 0 | 0 | 1      | Ref |
| KC911856 | Unassigned | Unassigned | Unassigned | 492_0  | Clustered           | 20 | VC_492_0  | 20 | 0.7887 | 1          | 0.7887 | 0 | 0 | 0 | 0 | 1      | Ref |
| KC911857 | Unassigned | Unassigned | Unassigned | 492_0  | Clustered           | 20 | VC_492_0  | 20 | 0.7887 | 1          | 0.7887 | 0 | 0 | 0 | 0 | 1      | Ref |
| KC954774 | Unassigned | Unassigned | Unassigned | 873_5  | Clustered           | 3  | VC_873_5  | 3  | 0.0491 | 0.9761082  | 0.0479 | 0 | 0 | 0 | 0 | 1      | Ref |
| KC954775 | Unassigned | Unassigned | Unassigned | 599_0  | Clustered           | 2  | VC_599_0  | 2  | 0.061  | 0.95763305 | 0.0584 | 0 | 0 | 0 | 0 | 1      | Ref |
| KC959568 | Unassigned | Unassigned | Unassigned | 1061_0 | Clustered           | 8  | VC_1061_0 | 8  | 0.8379 | 1          | 0.8379 | 0 | 0 | 0 | 0 | 1      | Ref |
| KC960489 | Unassigned | Unassigned | Unassigned | 1064_0 | Clustered           | 2  | VC_1064_0 | 2  | 1      | 1          | 1      | 0 | 0 | 0 | 0 | 1      | Ref |
| KC960671 | Unassigned | Unassigned | Unassigned | 398_0  | Clustered           | 51 | VC_398_0  | 51 | 0.8741 | 1          | 0.8741 | 0 | 0 | 0 | 0 | 1      | Ref |
| KC969441 | Unassigned | Unassigned | Unassigned | 434_0  | Clustered           | 45 | VC_434_0  | 45 | 0.9479 | 1          | 0.9479 | 0 | 0 | 0 | 0 | 1      | Ref |
| KF005317 | Unassigned | Unassigned | Unassigned | 1065_0 | Clustered           | 4  | VC_1065_0 | 4  | 1      | 0          | 0      | 0 | 0 | 0 | 0 | 1      | Ref |
| KF005318 | Unassigned | Unassigned | Unassigned | 1065_0 | Clustered           | 4  | VC_1065_0 | 4  | 1      | 0          | 0      | 0 | 0 | 0 | 0 | 1      | Ref |
| KF005319 | Unassigned | Unassigned | Unassigned | 1065_0 | Clustered           | 4  | VC_1065_0 | 4  | 1      | 0          | 0      | 0 | 0 | 0 | 0 | 1      | Ref |
| KF005320 | Unassigned | Unassigned | Unassigned | 1065_0 | Clustered           | 4  | VC_1065_0 | 4  | 1      | 0          | 0      | 0 | 0 | 0 | 0 | 1      | Ref |
| KF006817 | Unassigned | Unassigned | Unassigned | 579_9  | Clustered           | 3  | VC_579_9  | 3  |        |            |        |   |   |   |   |        |     |



|          |            |            |            |        |                     |              |     |        |            |        |   |   |   |            |
|----------|------------|------------|------------|--------|---------------------|--------------|-----|--------|------------|--------|---|---|---|------------|
| KF024725 | Unassigned | Unassigned | Unassigned | 918_0  | Clustered           | 16 VC_918_0  | 16  | 0.2945 | 1          | 0.2945 | 0 | 0 | 0 | 1 Ref      |
| KF024726 | Unassigned | Unassigned | Unassigned | 335_8  | Clustered           | 2 VC_335_8   | 2   | 0.0092 | 0.95751268 | 0.0088 | 0 | 0 | 0 | 1 Ref      |
| KF024727 | Unassigned | Unassigned | Unassigned | 385_1  | Clustered           | 9 VC_385_1   | 9   | 0.1928 | 1          | 0.1928 | 0 | 0 | 0 | 1 Ref      |
| KF024728 | Unassigned | Unassigned | Unassigned | 594_0  | Clustered           | 7 VC_594_0   | 7   | 0.2725 | 1          | 0.2725 | 0 | 0 | 0 | 1 Ref      |
| KF024729 | Unassigned | Unassigned | Unassigned | 385_3  | Clustered           | 5 VC_385_3   | 5   | 0.1118 | 0.99999997 | 0.1118 | 0 | 0 | 0 | 1 Ref      |
| KF024730 | Unassigned | Unassigned | Unassigned | 577_0  | Clustered           | 21 VC_577_0  | 21  | 0.9908 | 1          | 0.9908 | 0 | 0 | 0 | 1 Ref      |
| KF024731 | Unassigned | Unassigned | Unassigned | 917_0  | Clustered           | 28 VC_917_0  | 28  | 0.5465 | 1          | 0.5465 | 0 | 0 | 0 | 1 Ref      |
| KF024732 | Unassigned | Unassigned | Unassigned | 571_8  | Clustered           | 19 VC_571_8  | 19  | 0.1031 | 1          | 0.1031 | 0 | 0 | 0 | 0.8713 Ref |
| KF024733 | Unassigned | Unassigned | Unassigned | 535_1  | Clustered           | 108 VC_535_1 | 108 | 0.8479 | 1          | 0.8479 | 0 | 0 | 0 | 0.9955 Ref |
| KF024734 | Unassigned | Unassigned | Unassigned | 579_48 | Clustered           | 2 VC_579_48  | 2   | 0.0032 | 0.68030515 | 0.0022 | 0 | 0 | 0 | 1 Ref      |
| KF055347 | Unassigned | Unassigned | Unassigned | 340_16 | Clustered           | 4 VC_340_16  | 4   | 0.0157 | 0.9999807  | 0.0157 | 0 | 0 | 0 | 1 Ref      |
| KF056323 | Unassigned | Unassigned | Unassigned | 858_0  | Clustered           | 7 VC_858_0   | 7   | 1      | 1          | 1      | 0 | 0 | 0 | 1 Ref      |
| KF114874 | Unassigned | Unassigned | Unassigned | 538_9  | Clustered/Singleton | 1 VC_538_9   | 1   | 0      | 1          | 0      | 0 | 0 | 0 | 1 Ref      |
| KF114875 | Unassigned | Unassigned | Unassigned | 566_4  | Clustered           | 16 VC_566_4  | 16  | 0.2517 | 0.9999998  | 0.2517 | 0 | 0 | 0 | 0.9417 Ref |
| KF114876 | Unassigned | Unassigned | Unassigned | 703_1  | Clustered           | 2 VC_703_1   | 2   | 0.2226 | 0.91418477 | 0.2035 | 0 | 0 | 0 | 1 Ref      |
| KF114877 | Unassigned | Unassigned | Unassigned | 703_1  | Clustered           | 2 VC_703_1   | 2   | 0.2226 | 0.91418477 | 0.2035 | 0 | 0 | 0 | 1 Ref      |
| KF114879 | Unassigned | Unassigned | Unassigned | 703_0  | Clustered           | 3 VC_703_0   | 3   | 0.5841 | 0.99252665 | 0.5797 | 0 | 0 | 0 | 1 Ref      |
| KF114880 | Unassigned | Unassigned | Unassigned | 703_0  | Clustered           | 3 VC_703_0   | 3   | 0.5841 | 0.99252665 | 0.5797 | 0 | 0 | 0 | 1 Ref      |
| KF148055 | Unassigned | Unassigned | Unassigned | 654_2  | Clustered           | 2 VC_654_2   | 2   | 0.0038 | 0.92844927 | 0.0035 | 0 | 0 | 0 | 1 Ref      |
| KF148616 | Unassigned | Unassigned | Unassigned | 868_0  | Clustered           | 27 VC_868_0  | 27  | 0.9372 | 1          | 0.9372 | 0 | 0 | 0 | 1 Ref      |
| KF156338 | Unassigned | Unassigned | Unassigned | 447_2  | Clustered/Singleton | 1 VC_447_2   | 1   | 0      | 1          | 0      | 0 | 0 | 0 | 1 Ref      |
| KF188409 | Unassigned | Unassigned | Unassigned | 625_0  | Clustered           | 2 VC_625_0   | 2   | 0.2121 | 0.95222028 | 0.202  | 0 | 0 | 0 | 1 Ref      |
| KF188410 | Unassigned | Unassigned | Unassigned | 657_0  | Clustered           | 7 VC_657_0   | 7   | 0.8495 | 1          | 0.8495 | 0 | 0 | 0 | 1 Ref      |
| KF188414 | Unassigned | Unassigned | Unassigned | 571_2  | Clustered           | 17 VC_571_2  | 17  | 0.0965 | 1          | 0.0965 | 0 | 0 | 0 | 0.9779 Ref |
| KF192053 | Unassigned | Unassigned | Unassigned | 110_0  | Clustered           | 33 VC_110_0  | 33  | 0.9488 | 1          | 0.9488 | 0 | 0 | 0 | 1 Ref      |
| KF192075 | Unassigned | Unassigned | Unassigned | 801_0  | Clustered           | 37 VC_801_0  | 37  | 0.5672 | 1          | 0.5672 | 0 | 0 | 0 | 1 Ref      |
| KF208315 | Unassigned | Unassigned | Unassigned | 290_90 | Clustered/Singleton | 1 VC_290_90  | 1   | 0      | 1          | 0      | 0 | 0 | 0 | 1 Ref      |
| KF208639 | Unassigned | Unassigned | Unassigned | 912_1  | Clustered           | 12 VC_912_1  | 12  | 0.2423 | 1          | 0.2423 | 0 | 0 | 0 | 1 Ref      |
| KF279411 | Unassigned | Unassigned | Unassigned | 385_0  | Clustered           | 24 VC_385_0  | 24  | 0.5516 | 1          | 0.5516 | 0 | 0 | 0 | 1 Ref      |
| KF279412 | Unassigned | Unassigned | Unassigned | 385_0  | Clustered           | 24 VC_385_0  | 24  | 0.5516 | 1          | 0.5516 | 0 | 0 | 0 | 1 Ref      |
| KF279413 | Unassigned | Unassigned | Unassigned | 385_0  | Clustered           | 24 VC_385_0  | 24  | 0.5516 | 1          | 0.5516 | 0 | 0 | 0 | 1 Ref      |
| KF279415 | Unassigned | Unassigned | Unassigned | 335_49 | Clustered           | 17 VC_335_49 | 17  | 0.0731 | 1          | 0.0731 | 0 | 0 | 0 | 0.7721 Ref |
| KF279416 | Unassigned | Unassigned | Unassigned | 335_49 | Clustered           | 17 VC_335_49 | 17  | 0.0731 | 1          | 0.0731 | 0 | 0 | 0 | 0.7721 Ref |
| KF279417 | Unassigned | Unassigned | Unassigned | 571_7  | Clustered           | 28 VC_571_7  | 28  | 0.1651 | 1          | 0.1651 | 0 | 0 | 0 | 0.8519 Ref |
| KF279418 | Unassigned | Unassigned | Unassigned | 532_0  | Clustered           | 75 VC_532_0  | 75  | 0.9393 | 1          | 0.9393 | 0 | 0 | 0 | 1 Ref      |
| KF296717 | Unassigned | Unassigned | Unassigned | 853_0  | Clustered           | 5 VC_853_0   | 5   | 0.8735 | 0.9999832  | 0.8735 | 0 | 0 | 0 | 1 Ref      |
| KF302032 | Unassigned | Unassigned | Unassigned | 925_0  | Clustered           | 3 VC_925_0   | 3   | 0.6333 | 0.99692152 | 0.6314 | 0 | 0 | 0 | 1 Ref      |
| KF302033 | Unassigned | Unassigned | Unassigned | 925_0  | Clustered           | 3 VC_925_0   | 3   | 0.6333 | 0.99692152 | 0.6314 | 0 | 0 | 0 | 1 Ref      |
| KF302034 | Unassigned | Unassigned | Unassigned | 514_0  | Clustered/Singleton | 1 VC_514_0   | 1   | 0      | 1          | 0      | 0 | 0 | 0 | 1 Ref      |
| KF302035 | Unassigned | Unassigned | Unassigned | 189_0  | Clustered           | 2 VC_189_0   | 2   | 0.0711 | 0.95489589 | 0.0679 | 0 | 0 | 0 | 1 Ref      |
| KF302036 | Unassigned | Unassigned | Unassigned | 926_0  | Clustered           | 2 VC_926_0   | 2   | 0.2769 | 0.94251254 | 0.261  | 0 | 0 | 0 | 1 Ref      |
| KF302037 | Unassigned | Unassigned | Unassigned | 773_3  | Clustered           | 2 VC_773_3   | 2   | 0.1621 | 0.95427014 | 0.1547 | 0 | 0 | 0 | 1 Ref      |
| KF306380 | Unassigned | Unassigned | Unassigned | 571_3  | Clustered/Singleton | 1 VC_571_3   | 1   | 0      | 1          | 0      | 0 | 0 | 0 | 1 Ref      |
| KF319020 | Unassigned | Unassigned | Unassigned | 114_0  | Clustered           | 8 VC_114_0   | 8   | 0.2518 | 1          | 0.2518 | 0 | 0 | 0 | 1 Ref      |
| KF322026 | Unassigned | Unassigned | Unassigned | 1067_0 | Clustered           | 20 VC_1067_0 | 20  | 0.7109 | 1          | 0.7109 | 0 | 0 | 0 | 1 Ref      |
| KF322032 | Unassigned | Unassigned | Unassigned | 235_0  | Clustered           | 60 VC_235_0  | 60  | 0.9413 | 1          | 0.9413 | 0 | 0 | 0 | 1 Ref      |
| KF356199 | Unassigned | Unassigned | Unassigned | 41_0   | Clustered           | 3 VC_41_0    | 3   | 1      | 0          | 0      | 0 | 0 | 0 | 1 Ref      |
| KF361475 | Unassigned | Unassigned | Unassigned | 5_0    | Clustered           | 27 VC_5_0    | 27  | 0.9599 | 1          | 0.9599 | 0 | 0 | 0 | 1 Ref      |
| KF381361 | Unassigned | Unassigned | Unassigned | 451_0  | Clustered           | 4 VC_451_0   | 4   | 0.5528 | 0.99998171 | 0.5528 | 0 | 0 | 0 | 1 Ref      |
| KF416340 | Unassigned | Unassigned | Unassigned | 335_43 | Clustered           | 4 VC_335_43  | 4   | 0.014  | 0.99995965 | 0.014  | 0 | 0 | 0 | 1 Ref      |
| KF416341 | Unassigned | Unassigned | Unassigned | 385_1  | Clustered           | 9 VC_385_1   | 9   | 0.1928 | 1          | 0.1928 | 0 | 0 | 0 | 1 Ref      |
| KF416342 | Unassigned | Unassigned | Unassigned | 588_0  | Clustered           | 8 VC_588_0   | 8   | 0.5695 | 1          | 0.5695 | 0 | 0 | 0 | 1 Ref      |
| KF416343 | Unassigned | Unassigned | Unassigned | 571_4  | Clustered           | 2 VC_571_4   | 2   | 0.006  | 0.95695857 | 0.0057 | 0 | 0 | 0 | 1 Ref      |
| KF416344 | Unassigned | Unassigned | Unassigned | 222_0  | Clustered           | 5 VC_222_0   | 5   | 0.072  | 0.99999997 | 0.072  | 0 | 0 | 0 | 1 Ref      |
| KF475786 | Unassigned | Unassigned | Unassigned | 185_0  | Clustered           | 53 VC_185_0  | 53  | 0.9153 | 1          | 0.9153 | 0 | 0 | 0 | 1 Ref      |
| KF493879 | Unassigned | Unassigned | Unassigned | 527_0  | Clustered           | 37 VC_527_0  | 37  | 0.9679 | 1          | 0.9679 | 0 | 0 | 0 | 1 Ref      |
| KF493880 | Unassigned | Unassigned | Unassigned | 335_3  | Clustered/Singleton | 1 VC_335_3   | 1   | 0      | 1          | 0      | 0 | 0 | 0 | 1 Ref      |
| KF493881 | Unassigned | Unassigned | Unassigned | 385_0  | Clustered           | 24 VC_385_0  | 24  | 0.5516 | 1          | 0.5516 | 0 | 0 | 0 | 1 Ref      |
| KF493882 | Unassigned | Unassigned | Unassigned | 974_0  | Clustered           | 34 VC_974_0  | 34  | 0.7953 | 1          | 0.7953 | 0 | 0 | 0 | 1 Ref      |
| KF493883 | Unassigned | Unassigned | Unassigned | 571_8  | Clustered           | 19 VC_571_8  | 19  | 0.1031 | 1          | 0.1031 | 0 | 0 | 0 | 0.8713 Ref |
| KF534715 | Unassigned | Unassigned | Unassigned | 816_0  | Clustered           | 35 VC_816_0  | 35  | 0.9824 | 1          | 0.9824 | 0 | 0 | 0 | 1 Ref      |
| KF550303 | Unassigned | Unassigned | Unassigned | 601_4  | Clustered           | 3 VC_601_4   | 3   | 0.0346 | 0.98052968 | 0.034  | 0 | 0 | 0 | 1 Ref      |
| KF554508 | Unassigned | Unassigned | Unassigned | 89_1   | Clustered           | 3 VC_89_1    | 3   | 0.1616 | 0.99777924 | 0.1612 | 0 | 0 | 0 | 1 Ref      |
| KF560330 | Unassigned | Unassigned | Unassigned | 974_0  | Clustered           | 34 VC_974_0  | 34  | 0.7953 | 1          | 0.7953 | 0 | 0 | 0 | 1 Ref      |
| KF560331 | Unassigned | Unassigned | Unassigned | 335_33 | Clustered           | 4 VC_335_33  | 4   | 0.0148 | 0.99998565 | 0.0148 | 0 | 0 | 0 | 1 Ref      |
| KF560332 | Unassigned | Unassigned | Unassigned | 230_0  | Clustered           | 38 VC_230_0  | 38  | 0.9076 | 1          | 0.9076 | 0 | 0 | 0 | 1 Ref      |
| KF560333 | Unassigned | Unassigned | Unassigned | 230_0  | Clustered           | 38 VC_230_0  | 38  | 0.9076 | 1          | 0.9076 | 0 | 0 | 0 | 1 Ref      |
| KF560334 | Unassigned | Unassigned | Unassigned | 230_0  | Clustered           | 38 VC_230_0  | 38  | 0.9076 | 1          | 0.9076 | 0 | 0 | 0 | 1 Ref      |
| KF562099 | Unassigned | Unassigned | Unassigned | 571_8  | Clustered           | 19 VC_571_8  | 19  | 0.1031 | 1          | 0.1031 | 0 | 0 | 0 | 0.8713 Ref |
| KF562100 | Unassigned | Unassigned | Unassigned | 571_8  | Clustered           | 19 VC_571_8  | 19  | 0.1031 | 1          | 0.1031 | 0 | 0 | 0 | 0.8713 Ref |
| KF562101 | Unassigned | Unassigned | Unassigned | 571_8  | Clustered           | 19 VC_571_8  | 19  | 0.1031 | 1          | 0.1031 | 0 | 0 | 0 | 0.8713 Ref |
| KF562102 | Unassigned | Unassigned | Unassigned | 571_8  | Clustered           | 19 VC_571_8  | 19  | 0.1031 | 1          | 0.1031 | 0 | 0 | 0 | 0.8713 Ref |
| KF562340 | Unassigned | Unassigned | Unassigned | 801_0  | Clustered           | 37 VC_801_0  | 37  | 0.5672 | 1          | 0.5672 | 0 | 0 | 0 | 1 Ref      |
| KF562341 | Unassigned | Unassigned | Unassigned | 293_10 | Clustered           | 9 VC_293_10  | 9   | 0.0615 | 0.99999884 | 0.0615 | 0 | 0 | 0 | 0.6667 Ref |
| KF562864 | Unassigned | Unassigned | Unassigned | 654_1  | Clustered           | 27 VC_654_1  | 27  | 0.2571 | 1          | 0.2571 | 0 | 0 | 0 | 0.9858 Ref |
| KF562865 | Unassigned | Unassigned | Unassigned | 654_1  | Clustered           | 27 VC_654_1  | 27  | 0.2571 | 1          | 0.2571 | 0 | 0 | 0 | 0.9858 Ref |
| KF582788 | Unassigned | Unassigned | Unassigned | 293_13 | Clustered           | 10 VC_293_13 | 10  | 0.0698 | 0.99999931 | 0.0698 | 0 | 0 | 0 | 0.9556 Ref |
| KF591601 | Unassigned | Unassigned | Unassigned | 721_0  | Clustered           | 11 VC_721_0  | 11  | 0.8846 | 1          | 0.8846 | 0 | 0 | 0 | 1 Ref      |
| KF598856 | Unassigned | Unassigned | Unassigned | 8_0    | Clustered           | 58 VC_8_0    | 58  | 0.8285 | 1          | 0.8285 | 0 | 0 | 0 | 0.9946 Ref |
| KF598865 | Unassigned | Unassigned | Unassigned | 799_0  | Clustered           | 3 VC_799_0   | 3   | 0.4746 | 0.9961812  | 0.4727 | 0 | 0 | 0 | 1 Ref      |
| KF614509 | Unassigned | Unassigned | Unassigned | 1023_0 | Clustered           | 3 VC_1023_0  | 3   | 0.6263 | 0.99819562 | 0.6252 | 0 | 0 | 0 | 1 Ref      |



|          |            |            |            |         |                     |              |     |        |            |        |   |   |   |            |
|----------|------------|------------|------------|---------|---------------------|--------------|-----|--------|------------|--------|---|---|---|------------|
| KF620435 | Unassigned | Unassigned | Unassigned | 801_0   | Clustered           | 37 VC_801_0  | 37  | 0.5672 | 1          | 0.5672 | 0 | 0 | 0 | 1 Ref      |
| KF623293 | Unassigned | Unassigned | Unassigned | 932_0   | Clustered           | 5 VC_932_0   | 5   | 0.9252 | 0.99999497 | 0.9252 | 0 | 0 | 0 | 1 Ref      |
| KF623294 | Unassigned | Unassigned | Unassigned | 506_2   | Clustered           | 2 VC_506_2   | 2   | 0.0324 | 0.95511082 | 0.031  | 0 | 0 | 0 | 1 Ref      |
| KF626665 | Unassigned | Unassigned | Unassigned | 178_0   | Clustered           | 5 VC_178_0   | 5   | 0.3547 | 0.99999997 | 0.3547 | 0 | 0 | 0 | 1 Ref      |
| KF626667 | Unassigned | Unassigned | Unassigned | 75_0    | Clustered           | 15 VC_75_0   | 15  | 0.518  | 1          | 0.518  | 0 | 0 | 0 | 1 Ref      |
| KF626668 | Unassigned | Unassigned | Unassigned | 178_0   | Clustered           | 5 VC_178_0   | 5   | 0.3547 | 0.99999997 | 0.3547 | 0 | 0 | 0 | 1 Ref      |
| KF669647 | Unassigned | Unassigned | Unassigned | 912_1   | Clustered           | 12 VC_912_1  | 12  | 0.2423 | 1          | 0.2423 | 0 | 0 | 0 | 1 Ref      |
| KF669648 | Unassigned | Unassigned | Unassigned | 102_0   | Clustered           | 15 VC_102_0  | 15  | 0.653  | 1          | 0.653  | 0 | 0 | 0 | 1 Ref      |
| KF669649 | Unassigned | Unassigned | Unassigned | 89_0    | Clustered           | 8 VC_89_0    | 8   | 0.5507 | 1          | 0.5507 | 0 | 0 | 0 | 1 Ref      |
| KF669650 | Unassigned | Unassigned | Unassigned | 880_0   | Clustered           | 4 VC_880_0   | 4   | 0.0727 | 0.88800114 | 0.0645 | 0 | 0 | 0 | 1 Ref      |
| KF669651 | Unassigned | Unassigned | Unassigned | 102_0   | Clustered           | 15 VC_102_0  | 15  | 0.653  | 1          | 0.653  | 0 | 0 | 0 | 1 Ref      |
| KF669652 | Unassigned | Unassigned | Unassigned | 87_3    | Clustered           | 19 VC_87_3   | 19  | 0.3645 | 1          | 0.3645 | 0 | 0 | 0 | 0.807 Ref  |
| KF669653 | Unassigned | Unassigned | Unassigned | 135_0   | Clustered           | 2 VC_135_0   | 2   | 0.0062 | 0.94038885 | 0.0059 | 0 | 0 | 0 | 1 Ref      |
| KF669654 | Unassigned | Unassigned | Unassigned | 135_0   | Clustered           | 2 VC_135_0   | 2   | 0.0062 | 0.94038885 | 0.0059 | 0 | 0 | 0 | 1 Ref      |
| KF669655 | Unassigned | Unassigned | Unassigned | 1071_0  | Clustered           | 7 VC_1071_0  | 7   | 0.9883 | 0.99999504 | 0.9883 | 0 | 0 | 0 | 1 Ref      |
| KF669657 | Unassigned | Unassigned | Unassigned | 1071_0  | Clustered           | 7 VC_1071_0  | 7   | 0.9883 | 0.99999504 | 0.9883 | 0 | 0 | 0 | 1 Ref      |
| KF669659 | Unassigned | Unassigned | Unassigned | 102_0   | Clustered           | 15 VC_102_0  | 15  | 0.653  | 1          | 0.653  | 0 | 0 | 0 | 1 Ref      |
| KF669660 | Unassigned | Unassigned | Unassigned | 1071_0  | Clustered           | 7 VC_1071_0  | 7   | 0.9883 | 0.99999504 | 0.9883 | 0 | 0 | 0 | 1 Ref      |
| KF669662 | Unassigned | Unassigned | Unassigned | 912_3   | Clustered           | 2 VC_912_3   | 2   | 0.0181 | 0.87900236 | 0.0159 | 0 | 0 | 0 | 1 Ref      |
| KF676640 | Unassigned | Unassigned | Unassigned | 210_0   | Clustered           | 105 VC_210_0 | 105 | 0.4076 | 1          | 0.4076 | 0 | 0 | 0 | 0.7766 Ref |
| KF692088 | Unassigned | Unassigned | Unassigned | 1073_1  | Clustered/Singleton | 1 VC_1073_1  | 1   | 0.076  | 1          | 0      | 0 | 0 | 0 | 1 Ref      |
| KF700371 | Unassigned | Unassigned | Unassigned | 399_0   | Clustered           | 49 VC_399_0  | 49  | 0.7927 | 1          | 0.7927 | 0 | 0 | 0 | 1 Ref      |
| KF713485 | Unassigned | Unassigned | Unassigned | 384_3   | Clustered           | 22 VC_384_3  | 22  | 0.0786 | 1          | 0.0786 | 0 | 0 | 0 | 0.9048 Ref |
| KF713486 | Unassigned | Unassigned | Unassigned | 244_0   | Clustered           | 4 VC_244_0   | 4   | 0.0426 | 0.99998759 | 0.0426 | 0 | 0 | 0 | 1 Ref      |
| KF728385 | Unassigned | Unassigned | Unassigned | 711_0   | Clustered           | 48 VC_711_0  | 48  | 0.8217 | 1          | 0.8217 | 0 | 0 | 0 | 1 Ref      |
| KF733017 | Unassigned | Unassigned | Unassigned | 711_0   | Clustered           | 48 VC_711_0  | 48  | 0.8217 | 1          | 0.8217 | 0 | 0 | 0 | 1 Ref      |
| KF751793 | Unassigned | Unassigned | Unassigned | 1078_0  | Clustered           | 5 VC_1078_0  | 5   | 1      | 1          | 1      | 0 | 0 | 0 | 1 Ref      |
| KF751794 | Unassigned | Unassigned | Unassigned | 1078_0  | Clustered           | 5 VC_1078_0  | 5   | 1      | 1          | 1      | 0 | 0 | 0 | 1 Ref      |
| KF751795 | Unassigned | Unassigned | Unassigned | 1078_0  | Clustered           | 5 VC_1078_0  | 5   | 1      | 1          | 1      | 0 | 0 | 0 | 1 Ref      |
| KF751796 | Unassigned | Unassigned | Unassigned | 1078_0  | Clustered           | 5 VC_1078_0  | 5   | 1      | 1          | 1      | 0 | 0 | 0 | 1 Ref      |
| KF751797 | Unassigned | Unassigned | Unassigned | 1078_0  | Clustered           | 5 VC_1078_0  | 5   | 1      | 1          | 1      | 0 | 0 | 0 | 1 Ref      |
| KF765493 | Unassigned | Unassigned | Unassigned | 113_0   | Clustered           | 91 VC_113_0  | 91  | 0.9584 | 1          | 0.9584 | 0 | 0 | 0 | 1 Ref      |
| KF766114 | Unassigned | Unassigned | Unassigned | 155_8   | Clustered           | 66 VC_155_8  | 66  | 0.4537 | 1          | 0.4537 | 0 | 0 | 0 | 0.8182 Ref |
| KF766125 | Unassigned | Unassigned | Unassigned | 48_0    | Clustered           | 2 VC_48_0    | 2   | 0.018  | 0.95763863 | 0.0172 | 0 | 0 | 0 | 1 Ref      |
| KF767351 | Unassigned | Unassigned | Unassigned | 275_0   | Clustered           | 6 VC_275_0   | 6   | 0.6515 | 0.99999994 | 0.6515 | 0 | 0 | 0 | 0.9333 Ref |
| KF771236 | Unassigned | Unassigned | Unassigned | 469_0   | Clustered           | 18 VC_469_0  | 18  | 0.4583 | 1          | 0.4583 | 0 | 0 | 0 | 1 Ref      |
| KF771237 | Unassigned | Unassigned | Unassigned | 469_0   | Clustered           | 18 VC_469_0  | 18  | 0.4583 | 1          | 0.4583 | 0 | 0 | 0 | 1 Ref      |
| KF771238 | Unassigned | Unassigned | Unassigned | 469_0   | Clustered           | 18 VC_469_0  | 18  | 0.4583 | 1          | 0.4583 | 0 | 0 | 0 | 1 Ref      |
| KF771239 | Unassigned | Unassigned | Unassigned | 469_0   | Clustered           | 18 VC_469_0  | 18  | 0.4583 | 1          | 0.4583 | 0 | 0 | 0 | 1 Ref      |
| KF787094 | Unassigned | Unassigned | Unassigned | 801_1   | Clustered           | 11 VC_801_1  | 11  | 0.1583 | 1          | 0.1583 | 0 | 0 | 0 | 1 Ref      |
| KF787095 | Unassigned | Unassigned | Unassigned | 801_1   | Clustered           | 11 VC_801_1  | 11  | 0.1583 | 1          | 0.1583 | 0 | 0 | 0 | 1 Ref      |
| KF800937 | Unassigned | Unassigned | Unassigned | 1067_0  | Clustered           | 20 VC_1067_0 | 20  | 0.7109 | 1          | 0.7109 | 0 | 0 | 0 | 1 Ref      |
| KF806588 | Unassigned | Unassigned | Unassigned | 801_2   | Clustered           | 5 VC_801_2   | 5   | 0.087  | 0.99999997 | 0.087  | 0 | 0 | 0 | 1 Ref      |
| KF806589 | Unassigned | Unassigned | Unassigned | 507_1   | Clustered           | 11 VC_507_1  | 11  | 0.4612 | 1          | 0.4612 | 0 | 0 | 0 | 1 Ref      |
| KF831354 | Unassigned | Unassigned | Unassigned | 10_0    | Clustered           | 25 VC_10_0   | 25  | 0.3437 | 1          | 0.3437 | 0 | 0 | 0 | 0.9733 Ref |
| KF835987 | Unassigned | Unassigned | Unassigned | 508_2   | Clustered/Singleton | 1 VC_508_2   | 1   | 0      | 1          | 0      | 0 | 0 | 0 | 1 Ref      |
| KF841475 | Unassigned | Unassigned | Unassigned | 535_1   | Clustered           | 108 VC_535_1 | 108 | 0.8479 | 1          | 0.8479 | 0 | 0 | 0 | 0.9955 Ref |
| KF841476 | Unassigned | Unassigned | Unassigned | 535_1   | Clustered           | 108 VC_535_1 | 108 | 0.8479 | 1          | 0.8479 | 0 | 0 | 0 | 0.9955 Ref |
| KF841477 | Unassigned | Unassigned | Unassigned | 537_0   | Clustered           | 39 VC_537_0  | 39  | 0.8148 | 1          | 0.8148 | 0 | 0 | 0 | 1 Ref      |
| KF854250 | Unassigned | Unassigned | Unassigned | 515_0   | Clustered           | 8 VC_515_0   | 8   | 0.3973 | 1          | 0.3973 | 0 | 0 | 0 | 1 Ref      |
| KF856712 | Unassigned | Unassigned | Unassigned | 486_0   | Clustered           | 47 VC_486_0  | 47  | 0.9022 | 1          | 0.9022 | 0 | 0 | 0 | 1 Ref      |
| KF861510 | Unassigned | Unassigned | Unassigned | 225_0   | Clustered           | 3 VC_225_0   | 3   | 0.0477 | 0.99860979 | 0.0477 | 0 | 0 | 0 | 1 Ref      |
| KF925257 | Unassigned | Unassigned | Unassigned | 290_163 | Clustered           | 2 VC_290_163 | 2   | 0.0029 | 0.93227927 | 0.0027 | 0 | 0 | 0 | 1 Ref      |
| KF926093 | Unassigned | Unassigned | Unassigned | 488_0   | Clustered           | 14 VC_488_0  | 14  | 0.8516 | 1          | 0.8516 | 0 | 0 | 0 | 1 Ref      |
| KF929199 | Unassigned | Unassigned | Unassigned | 685_0   | Clustered           | 7 VC_685_0   | 7   | 0.4045 | 1          | 0.4045 | 0 | 0 | 0 | 1 Ref      |
| KF954506 | Unassigned | Unassigned | Unassigned | 535_1   | Clustered           | 108 VC_535_1 | 108 | 0.8479 | 1          | 0.8479 | 0 | 0 | 0 | 0.9955 Ref |
| KF959563 | Unassigned | Unassigned | Unassigned | 535_1   | Clustered           | 108 VC_535_1 | 108 | 0.8479 | 1          | 0.8479 | 0 | 0 | 0 | 0.9955 Ref |
| KF971864 | Unassigned | Unassigned | Unassigned | 44_0    | Clustered           | 49 VC_44_0   | 49  | 0.4506 | 1          | 0.4506 | 0 | 0 | 0 | 0.8605 Ref |
| KF977490 | Unassigned | Unassigned | Unassigned | 126_0   | Clustered           | 2 VC_126_0   | 2   | 0.373  | 0.95337092 | 0.3556 | 0 | 0 | 0 | 1 Ref      |
| KF981601 | Unassigned | Unassigned | Unassigned | 223_6   | Clustered           | 42 VC_223_6  | 42  | 0.4717 | 1          | 0.4717 | 0 | 0 | 0 | 0.8351 Ref |
| KF981730 | Unassigned | Unassigned | Unassigned | 837_1   | Clustered           | 24 VC_837_1  | 24  | 0.5328 | 1          | 0.5328 | 0 | 0 | 0 | 1 Ref      |
| KF981875 | Unassigned | Unassigned | Unassigned | 81_0    | Clustered           | 41 VC_81_0   | 41  | 0.5815 | 1          | 0.5815 | 0 | 0 | 0 | 0.9805 Ref |
| KF981876 | Unassigned | Unassigned | Unassigned | 1064_0  | Clustered           | 2 VC_1064_0  | 2   | 1      | 1          | 1      | 0 | 0 | 0 | 1 Ref      |
| KF986246 | Unassigned | Unassigned | Unassigned | 539_0   | Clustered           | 37 VC_539_0  | 37  | 0.911  | 1          | 0.911  | 0 | 0 | 0 | 1 Ref      |
| KF986247 | Unassigned | Unassigned | Unassigned | 587_0   | Clustered           | 8 VC_587_0   | 8   | 0.4907 | 1          | 0.4907 | 0 | 0 | 0 | 1 Ref      |
| KJ002054 | Unassigned | Unassigned | Unassigned | 817_0   | Clustered           | 12 VC_817_0  | 12  | 0.8497 | 1          | 0.8497 | 0 | 0 | 0 | 1 Ref      |
| KJ003983 | Unassigned | Unassigned | Unassigned | 1054_2  | Clustered           | 2 VC_1054_2  | 2   | 0.06   | 0.95033624 | 0.057  | 0 | 0 | 0 | 1 Ref      |
| KJ010547 | Unassigned | Unassigned | Unassigned | 87_0    | Clustered           | 3 VC_87_0    | 3   | 0.0416 | 0.99823485 | 0.0415 | 0 | 0 | 0 | 1 Ref      |
| KJ010548 | Unassigned | Unassigned | Unassigned | 87_0    | Clustered           | 3 VC_87_0    | 3   | 0.0416 | 0.99823485 | 0.0415 | 0 | 0 | 0 | 1 Ref      |
| KJ018213 | Unassigned | Unassigned | Unassigned | 851_0   | Clustered           | 6 VC_851_0   | 6   | 0.7471 | 1          | 0.7471 | 0 | 0 | 0 | 1 Ref      |
| KJ019028 | Unassigned | Unassigned | Unassigned | 675_1   | Clustered           | 46 VC_675_1  | 46  | 0.8493 | 1          | 0.8493 | 0 | 0 | 0 | 1 Ref      |
| KJ019029 | Unassigned | Unassigned | Unassigned | 675_1   | Clustered           | 46 VC_675_1  | 46  | 0.8493 | 1          | 0.8493 | 0 | 0 | 0 | 1 Ref      |
| KJ019031 | Unassigned | Unassigned | Unassigned | 675_1   | Clustered           | 46 VC_675_1  | 46  | 0.8493 | 1          | 0.8493 | 0 | 0 | 0 | 1 Ref      |
| KJ019032 | Unassigned | Unassigned | Unassigned | 675_1   | Clustered           | 46 VC_675_1  | 46  | 0.8493 | 1          | 0.8493 | 0 | 0 | 0 | 1 Ref      |
| KJ019034 | Unassigned | Unassigned | Unassigned | 675_1   | Clustered           | 46 VC_675_1  | 46  | 0.8493 | 1          | 0.8493 | 0 | 0 | 0 | 1 Ref      |
| KJ019035 | Unassigned | Unassigned | Unassigned | 675_1   | Clustered           | 46 VC_675_1  | 46  | 0.8493 | 1          | 0.8493 | 0 | 0 | 0 | 1 Ref      |
| KJ019036 | Unassigned | Unassigned | Unassigned | 675_1   | Clustered           | 46 VC_675_1  | 46  | 0.8493 | 1          | 0.8493 | 0 | 0 | 0 | 1 Ref      |
| KJ019037 | Unassigned | Unassigned | Unassigned | 676_1   | Clustered           | 41 VC_676_1  | 41  | 0.7464 | 1          | 0.7464 | 0 | 0 | 0 | 1 Ref      |
| KJ019045 | Unassigned | Unassigned | Unassigned | 676_1   | Clustered           | 41 VC_676_1  | 41  | 0.7464 | 1          | 0.7464 | 0 | 0 | 0 | 1 Ref      |
| KJ019046 | Unassigned | Unassigned | Unassigned | 675_1   | Clustered           | 46 VC_675_1  | 46  | 0.8493 | 1          | 0.8493 | 0 | 0 | 0 | 1 Ref      |
| KJ019047 | Unassigned | Unassigned | Unassigned | 675_1   | Clustered           | 46 VC_675_1  | 46  | 0.8493 | 1          | 0.8493 | 0 | 0 | 0 | 1 Ref      |



[illegible]



|          |            |            |            |        |                     |              |    |        |            |        |   |   |   |            |
|----------|------------|------------|------------|--------|---------------------|--------------|----|--------|------------|--------|---|---|---|------------|
| KJ019165 | Unassigned | Unassigned | Unassigned | 675_1  | Clustered           | 46 VC_675_1  | 46 | 0.8493 | 1          | 0.8493 | 0 | 0 | 0 | 1 Ref      |
| KJ021043 | Unassigned | Unassigned | Unassigned | 125_0  | Clustered           | 23 VC_125_0  | 23 | 0.8163 | 1          | 0.8163 | 0 | 0 | 0 | 1 Ref      |
| KJ025956 | Unassigned | Unassigned | Unassigned | 538_38 | Clustered           | 6 VC_538_38  | 6  | 0.0517 | 1          | 0.0517 | 0 | 0 | 0 | 0.8667 Ref |
| KJ025957 | Unassigned | Unassigned | Unassigned | 291_0  | Clustered           | 3 VC_291_0   | 3  | 0.0482 | 0.99860971 | 0.0482 | 0 | 0 | 0 | 1 Ref      |
| KJ028219 | Unassigned | Unassigned | Unassigned | 833_0  | Clustered           | 2 VC_833_0   | 2  | 0.1786 | 0.96299906 | 0.172  | 0 | 0 | 0 | 1 Ref      |
| KJ081346 | Unassigned | Unassigned | Unassigned | 195_2  | Clustered           | 2 VC_195_2   | 2  | 0.0208 | 0.93079499 | 0.0193 | 0 | 0 | 0 | 1 Ref      |
| KJ094020 | Unassigned | Unassigned | Unassigned | 1002_0 | Clustered           | 10 VC_1002_0 | 10 | 0.9987 | 1          | 0.9987 | 0 | 0 | 0 | 1 Ref      |
| KJ094021 | Unassigned | Unassigned | Unassigned | 1002_0 | Clustered           | 10 VC_1002_0 | 10 | 0.9987 | 1          | 0.9987 | 0 | 0 | 0 | 1 Ref      |
| KJ094022 | Unassigned | Unassigned | Unassigned | 392_0  | Clustered           | 9 VC_392_0   | 9  | 0.7527 | 1          | 0.7527 | 0 | 0 | 0 | 1 Ref      |
| KJ094023 | Unassigned | Unassigned | Unassigned | 393_0  | Clustered           | 5 VC_393_0   | 5  | 0.4703 | 0.99999992 | 0.4703 | 0 | 0 | 0 | 0.9 Ref    |
| KJ094029 | Unassigned | Unassigned | Unassigned | 753_0  | Clustered           | 26 VC_753_0  | 26 | 0.9562 | 1          | 0.9562 | 0 | 0 | 0 | 1 Ref      |
| KJ094030 | Unassigned | Unassigned | Unassigned | 753_0  | Clustered           | 26 VC_753_0  | 26 | 0.9562 | 1          | 0.9562 | 0 | 0 | 0 | 1 Ref      |
| KJ094031 | Unassigned | Unassigned | Unassigned | 753_0  | Clustered           | 26 VC_753_0  | 26 | 0.9562 | 1          | 0.9562 | 0 | 0 | 0 | 1 Ref      |
| KJ094032 | Unassigned | Unassigned | Unassigned | 110_0  | Clustered           | 33 VC_110_0  | 33 | 0.9488 | 1          | 0.9488 | 0 | 0 | 0 | 1 Ref      |
| KJ094033 | Unassigned | Unassigned | Unassigned | 753_0  | Clustered           | 26 VC_753_0  | 26 | 0.9562 | 1          | 0.9562 | 0 | 0 | 0 | 1 Ref      |
| KJ127303 | Unassigned | Unassigned | Unassigned | 110_0  | Clustered           | 33 VC_110_0  | 33 | 0.9488 | 1          | 0.9488 | 0 | 0 | 0 | 1 Ref      |
| KJ127304 | Unassigned | Unassigned | Unassigned | 711_0  | Clustered           | 48 VC_711_0  | 48 | 0.8217 | 1          | 0.8217 | 0 | 0 | 0 | 1 Ref      |
| KJ133688 | Unassigned | Unassigned | Unassigned | 908_0  | Clustered           | 36 VC_908_0  | 36 | 0.9943 | 1          | 0.9943 | 0 | 0 | 0 | 1 Ref      |
| KJ133689 | Unassigned | Unassigned | Unassigned | 908_0  | Clustered           | 36 VC_908_0  | 36 | 0.9943 | 1          | 0.9943 | 0 | 0 | 0 | 1 Ref      |
| KJ133690 | Unassigned | Unassigned | Unassigned | 908_0  | Clustered           | 36 VC_908_0  | 36 | 0.9943 | 1          | 0.9943 | 0 | 0 | 0 | 1 Ref      |
| KJ133691 | Unassigned | Unassigned | Unassigned | 908_0  | Clustered           | 36 VC_908_0  | 36 | 0.9943 | 1          | 0.9943 | 0 | 0 | 0 | 1 Ref      |
| KJ133692 | Unassigned | Unassigned | Unassigned | 908_0  | Clustered           | 36 VC_908_0  | 36 | 0.9943 | 1          | 0.9943 | 0 | 0 | 0 | 1 Ref      |
| KJ133693 | Unassigned | Unassigned | Unassigned | 908_0  | Clustered           | 36 VC_908_0  | 36 | 0.9943 | 1          | 0.9943 | 0 | 0 | 0 | 1 Ref      |
| KJ133694 | Unassigned | Unassigned | Unassigned | 908_0  | Clustered           | 36 VC_908_0  | 36 | 0.9943 | 1          | 0.9943 | 0 | 0 | 0 | 1 Ref      |
| KJ133695 | Unassigned | Unassigned | Unassigned | 908_0  | Clustered           | 36 VC_908_0  | 36 | 0.9943 | 1          | 0.9943 | 0 | 0 | 0 | 1 Ref      |
| KJ133696 | Unassigned | Unassigned | Unassigned | 908_0  | Clustered           | 36 VC_908_0  | 36 | 0.9943 | 1          | 0.9943 | 0 | 0 | 0 | 1 Ref      |
| KJ133697 | Unassigned | Unassigned | Unassigned | 908_0  | Clustered           | 36 VC_908_0  | 36 | 0.9943 | 1          | 0.9943 | 0 | 0 | 0 | 1 Ref      |
| KJ133698 | Unassigned | Unassigned | Unassigned | 908_0  | Clustered           | 36 VC_908_0  | 36 | 0.9943 | 1          | 0.9943 | 0 | 0 | 0 | 1 Ref      |
| KJ133699 | Unassigned | Unassigned | Unassigned | 908_0  | Clustered           | 36 VC_908_0  | 36 | 0.9943 | 1          | 0.9943 | 0 | 0 | 0 | 1 Ref      |
| KJ133700 | Unassigned | Unassigned | Unassigned | 908_0  | Clustered           | 36 VC_908_0  | 36 | 0.9943 | 1          | 0.9943 | 0 | 0 | 0 | 1 Ref      |
| KJ133701 | Unassigned | Unassigned | Unassigned | 908_0  | Clustered           | 36 VC_908_0  | 36 | 0.9943 | 1          | 0.9943 | 0 | 0 | 0 | 1 Ref      |
| KJ133702 | Unassigned | Unassigned | Unassigned | 908_0  | Clustered           | 36 VC_908_0  | 36 | 0.9943 | 1          | 0.9943 | 0 | 0 | 0 | 1 Ref      |
| KJ133703 | Unassigned | Unassigned | Unassigned | 908_0  | Clustered           | 36 VC_908_0  | 36 | 0.9943 | 1          | 0.9943 | 0 | 0 | 0 | 1 Ref      |
| KJ133704 | Unassigned | Unassigned | Unassigned | 908_0  | Clustered           | 36 VC_908_0  | 36 | 0.9943 | 1          | 0.9943 | 0 | 0 | 0 | 1 Ref      |
| KJ133705 | Unassigned | Unassigned | Unassigned | 908_0  | Clustered           | 36 VC_908_0  | 36 | 0.9943 | 1          | 0.9943 | 0 | 0 | 0 | 1 Ref      |
| KJ133706 | Unassigned | Unassigned | Unassigned | 908_0  | Clustered           | 36 VC_908_0  | 36 | 0.9943 | 1          | 0.9943 | 0 | 0 | 0 | 1 Ref      |
| KJ133707 | Unassigned | Unassigned | Unassigned | 908_0  | Clustered           | 36 VC_908_0  | 36 | 0.9943 | 1          | 0.9943 | 0 | 0 | 0 | 1 Ref      |
| KJ135004 | Unassigned | Unassigned | Unassigned | 801_0  | Clustered           | 37 VC_801_0  | 37 | 0.5672 | 1          | 0.5672 | 0 | 0 | 0 | 1 Ref      |
| KJ140076 | Unassigned | Unassigned | Unassigned | 12_0   | Clustered           | 21 VC_12_0   | 21 | 0.2262 | 1          | 0.2262 | 0 | 0 | 0 | 0.9571 Ref |
| KJ156985 | Unassigned | Unassigned | Unassigned | 533_0  | Clustered           | 16 VC_533_0  | 16 | 0.3765 | 1          | 0.3765 | 0 | 0 | 0 | 1 Ref      |
| KJ159566 | Unassigned | Unassigned | Unassigned | 104_0  | Clustered           | 2 VC_104_0   | 2  | 0.1066 | 0.94642368 | 0.1008 | 0 | 0 | 0 | 1 Ref      |
| KJ173786 | Unassigned | Unassigned | Unassigned | 881_1  | Clustered           | 13 VC_881_1  | 13 | 0.5859 | 1          | 0.5859 | 0 | 0 | 0 | 1 Ref      |
| KJ174156 | Unassigned | Unassigned | Unassigned | 335_15 | Clustered/Singleton | 1 VC_335_15  | 1  | 0      | 1          | 0      | 0 | 0 | 0 | 1 Ref      |
| KJ174157 | Unassigned | Unassigned | Unassigned | 384_3  | Clustered           | 22 VC_384_3  | 22 | 0.0786 | 1          | 0.0786 | 0 | 0 | 0 | 0.9048 Ref |
| KJ174317 | Unassigned | Unassigned | Unassigned | 135_22 | Clustered           | 13 VC_135_22 | 13 | 0.0795 | 1          | 0.0795 | 0 | 0 | 0 | 0.8205 Ref |
| KJ174318 | Unassigned | Unassigned | Unassigned | 135_16 | Clustered/Singleton | 1 VC_135_16  | 1  | 0      | 1          | 0      | 0 | 0 | 0 | 1 Ref      |
| KJ183191 | Unassigned | Unassigned | Unassigned | 500_0  | Clustered           | 3 VC_500_0   | 3  | 0.3143 | 0.99843638 | 0.3138 | 0 | 0 | 0 | 1 Ref      |
| KJ183192 | Unassigned | Unassigned | Unassigned | 500_0  | Clustered           | 3 VC_500_0   | 3  | 0.3143 | 0.99843638 | 0.3138 | 0 | 0 | 0 | 1 Ref      |
| KJ183193 | Unassigned | Unassigned | Unassigned | 500_0  | Clustered           | 3 VC_500_0   | 3  | 0.3143 | 0.99843638 | 0.3138 | 0 | 0 | 0 | 1 Ref      |
| KJ190157 | Unassigned | Unassigned | Unassigned | 198_15 | Clustered           | 3 VC_198_15  | 3  | 0.0144 | 0.99754982 | 0.0144 | 0 | 0 | 0 | 0.6667 Ref |
| KJ190158 | Unassigned | Unassigned | Unassigned | 794_16 | Clustered           | 10 VC_794_16 | 10 | 0.0563 | 0.9411319  | 0.053  | 0 | 0 | 0 | 0.8667 Ref |
| KJ194579 | Unassigned | Unassigned | Unassigned | 384_18 | Clustered           | 10 VC_384_18 | 10 | 0.0301 | 1          | 0.0301 | 0 | 0 | 0 | 0.8 Ref    |
| KJ194580 | Unassigned | Unassigned | Unassigned | 384_16 | Clustered           | 42 VC_384_16 | 42 | 0.134  | 1          | 0.134  | 0 | 0 | 0 | 0.7282 Ref |
| KJ194581 | Unassigned | Unassigned | Unassigned | 527_0  | Clustered           | 37 VC_527_0  | 37 | 0.9679 | 1          | 0.9679 | 0 | 0 | 0 | 1 Ref      |
| KJ194582 | Unassigned | Unassigned | Unassigned | 585_0  | Clustered           | 20 VC_585_0  | 20 | 0.8376 | 1          | 0.8376 | 0 | 0 | 0 | 1 Ref      |
| KJ194583 | Unassigned | Unassigned | Unassigned | 384_16 | Clustered           | 42 VC_384_16 | 42 | 0.134  | 1          | 0.134  | 0 | 0 | 0 | 0.7282 Ref |
| KJ194584 | Unassigned | Unassigned | Unassigned | 527_0  | Clustered           | 37 VC_527_0  | 37 | 0.9679 | 1          | 0.9679 | 0 | 0 | 0 | 1 Ref      |
| KJ194585 | Unassigned | Unassigned | Unassigned | 335_5  | Clustered           | 11 VC_335_5  | 11 | 0.0469 | 1          | 0.0469 | 0 | 0 | 0 | 0.7636 Ref |
| KJ206559 | Unassigned | Unassigned | Unassigned | 155_8  | Clustered           | 66 VC_155_8  | 66 | 0.4537 | 1          | 0.4537 | 0 | 0 | 0 | 0.8182 Ref |
| KJ206560 | Unassigned | Unassigned | Unassigned | 155_8  | Clustered           | 66 VC_155_8  | 66 | 0.4537 | 1          | 0.4537 | 0 | 0 | 0 | 0.8182 Ref |
| KJ206561 | Unassigned | Unassigned | Unassigned | 155_8  | Clustered           | 66 VC_155_8  | 66 | 0.4537 | 1          | 0.4537 | 0 | 0 | 0 | 0.8182 Ref |
| KJ206562 | Unassigned | Unassigned | Unassigned | 155_8  | Clustered           | 66 VC_155_8  | 66 | 0.4537 | 1          | 0.4537 | 0 | 0 | 0 | 0.8182 Ref |
| KJ206563 | Unassigned | Unassigned | Unassigned | 155_8  | Clustered           | 66 VC_155_8  | 66 | 0.4537 | 1          | 0.4537 | 0 | 0 | 0 | 0.8182 Ref |
| KJ210330 | Unassigned | Unassigned | Unassigned | 98_0   | Clustered           | 30 VC_98_0   | 30 | 0.7175 | 1          | 0.7175 | 0 | 0 | 0 | 1 Ref      |
| KJ409696 | Unassigned | Unassigned | Unassigned | 335_45 | Clustered           | 4 VC_335_45  | 4  | 0.0143 | 0.99998616 | 0.0143 | 0 | 0 | 0 | 0.8333 Ref |
| KJ409772 | Unassigned | Unassigned | Unassigned | 79_3   | Clustered           | 11 VC_79_3   | 11 | 0.2561 | 1          | 0.2561 | 0 | 0 | 0 | 1 Ref      |
| KJ410132 | Unassigned | Unassigned | Unassigned | 223_6  | Clustered           | 42 VC_223_6  | 42 | 0.4717 | 1          | 0.4717 | 0 | 0 | 0 | 0.8351 Ref |
| KJ410133 | Unassigned | Unassigned | Unassigned | 784_0  | Clustered           | 9 VC_784_0   | 9  | 0.0884 | 1          | 0.0884 | 0 | 0 | 0 | 1 Ref      |
| KJ410134 | Unassigned | Unassigned | Unassigned | 223_6  | Clustered           | 42 VC_223_6  | 42 | 0.4717 | 1          | 0.4717 | 0 | 0 | 0 | 0.8351 Ref |
| KJ410740 | Unassigned | Unassigned | Unassigned | 960_0  | Clustered           | 2 VC_960_0   | 2  | 0.086  | 0.75688284 | 0.0651 | 0 | 0 | 0 | 1 Ref      |
| KJ417497 | Unassigned | Unassigned | Unassigned | 427_0  | Clustered           | 37 VC_427_0  | 37 | 0.5729 | 1          | 0.5729 | 0 | 0 | 0 | 0.9474 Ref |
| KJ419279 | Unassigned | Unassigned | Unassigned | 737_0  | Clustered           | 13 VC_737_0  | 13 | 0.5083 | 1          | 0.5083 | 0 | 0 | 0 | 1 Ref      |
| KJ433973 | Unassigned | Unassigned | Unassigned | 385_3  | Clustered           | 5 VC_385_3   | 5  | 0.1118 | 0.99999997 | 0.1118 | 0 | 0 | 0 | 1 Ref      |
| KJ433974 | Unassigned | Unassigned | Unassigned | 385_3  | Clustered           | 5 VC_385_3   | 5  | 0.1118 | 0.99999997 | 0.1118 | 0 | 0 | 0 | 1 Ref      |
| KJ433975 | Unassigned | Unassigned | Unassigned | 385_3  | Clustered           | 5 VC_385_3   | 5  | 0.1118 | 0.99999997 | 0.1118 | 0 | 0 | 0 | 1 Ref      |
| KJ433976 | Unassigned | Unassigned | Unassigned | 385_3  | Clustered           | 5 VC_385_3   | 5  | 0.1118 | 0.99999997 | 0.1118 | 0 | 0 | 0 | 1 Ref      |
| KJ451625 | Unassigned | Unassigned | Unassigned | 195_3  | Clustered           | 9 VC_195_3   | 9  | 0.1955 | 1          | 0.1955 | 0 | 0 | 0 | 0.8611 Ref |
| KJ452291 | Unassigned | Unassigned | Unassigned | 12_0   | Clustered           | 21 VC_12_0   | 21 | 0.2262 | 1          | 0.2262 | 0 | 0 | 0 | 0.9571 Ref |
| KJ452292 | Unassigned | Unassigned | Unassigned | 10_0   | Clustered           | 25 VC_10_0   | 25 | 0.3437 | 1          | 0.3437 | 0 | 0 | 0 | 0.9733 Ref |
| KJ473422 | Unassigned | Unassigned | Unassigned | 715_1  | Clustered/Singleton | 1 VC_715_1   | 1  | 0      | 1          | 0      | 0 | 0 | 0 | 1 Ref      |
| KJ477077 | Unassigned | Unassigned | Unassigned | 185_0  | Clustered           | 53 VC_185_0  | 53 | 0.9153 | 1          | 0.9153 | 0 | 0 | 0 | 1 Ref      |



|          |            |            |            |        |                     |              |     |        |            |        |   |   |   |            |
|----------|------------|------------|------------|--------|---------------------|--------------|-----|--------|------------|--------|---|---|---|------------|
| KJ477684 | Unassigned | Unassigned | Unassigned | 290_91 | Clustered           | 11 VC_290_91 | 11  | 0.0281 | 1          | 0.0281 | 0 | 0 | 0 | 1 Ref      |
| KJ477685 | Unassigned | Unassigned | Unassigned | 290_91 | Clustered           | 11 VC_290_91 | 11  | 0.0281 | 1          | 0.0281 | 0 | 0 | 0 | 1 Ref      |
| KJ477686 | Unassigned | Unassigned | Unassigned | 290_91 | Clustered           | 11 VC_290_91 | 11  | 0.0281 | 1          | 0.0281 | 0 | 0 | 0 | 1 Ref      |
| KJ489010 | Unassigned | Unassigned | Unassigned | 823_0  | Clustered           | 4 VC_823_0   | 4   | 0.5645 | 0.99998533 | 0.5645 | 0 | 0 | 0 | 1 Ref      |
| KJ489011 | Unassigned | Unassigned | Unassigned | 823_0  | Clustered           | 4 VC_823_0   | 4   | 0.5645 | 0.99998533 | 0.5645 | 0 | 0 | 0 | 1 Ref      |
| KJ489012 | Unassigned | Unassigned | Unassigned | 823_0  | Clustered           | 4 VC_823_0   | 4   | 0.5645 | 0.99998533 | 0.5645 | 0 | 0 | 0 | 1 Ref      |
| KJ489013 | Unassigned | Unassigned | Unassigned | 823_0  | Clustered           | 4 VC_823_0   | 4   | 0.5645 | 0.99998533 | 0.5645 | 0 | 0 | 0 | 1 Ref      |
| KJ489397 | Unassigned | Unassigned | Unassigned | 912_0  | Clustered           | 10 VC_912_0  | 10  | 0.1994 | 1          | 0.1994 | 0 | 0 | 0 | 1 Ref      |
| KJ489398 | Unassigned | Unassigned | Unassigned | 912_0  | Clustered           | 10 VC_912_0  | 10  | 0.1994 | 1          | 0.1994 | 0 | 0 | 0 | 1 Ref      |
| KJ489399 | Unassigned | Unassigned | Unassigned | 913_0  | Clustered           | 28 VC_913_0  | 28  | 0.6206 | 1          | 0.6206 | 0 | 0 | 0 | 0.9841 Ref |
| KJ489400 | Unassigned | Unassigned | Unassigned | 912_0  | Clustered           | 10 VC_912_0  | 10  | 0.1994 | 1          | 0.1994 | 0 | 0 | 0 | 1 Ref      |
| KJ489401 | Unassigned | Unassigned | Unassigned | 913_0  | Clustered           | 28 VC_913_0  | 28  | 0.6206 | 1          | 0.6206 | 0 | 0 | 0 | 0.9841 Ref |
| KJ489402 | Unassigned | Unassigned | Unassigned | 912_1  | Clustered           | 12 VC_912_1  | 12  | 0.2423 | 1          | 0.2423 | 0 | 0 | 0 | 1 Ref      |
| KJ502657 | Unassigned | Unassigned | Unassigned | 1067_0 | Clustered           | 20 VC_1067_0 | 20  | 0.7109 | 1          | 0.7109 | 0 | 0 | 0 | 1 Ref      |
| KJ507099 | Unassigned | Unassigned | Unassigned | 131_0  | Clustered           | 43 VC_131_0  | 43  | 0.8853 | 1          | 0.8853 | 0 | 0 | 0 | 1 Ref      |
| KJ507100 | Unassigned | Unassigned | Unassigned | 712_0  | Clustered           | 5 VC_712_0   | 5   | 0.828  | 0.99999971 | 0.828  | 0 | 0 | 0 | 1 Ref      |
| KJ510413 | Unassigned | Unassigned | Unassigned | 1087_0 | Clustered           | 7 VC_1087_0  | 7   | 0.94   | 1          | 0.94   | 0 | 0 | 0 | 1 Ref      |
| KJ510414 | Unassigned | Unassigned | Unassigned | 535_1  | Clustered           | 108 VC_535_1 | 108 | 0.8479 | 1          | 0.8479 | 0 | 0 | 0 | 0.9955 Ref |
| KJ510415 | Unassigned | Unassigned | Unassigned | 531_0  | Clustered           | 32 VC_531_0  | 32  | 0.6859 | 1          | 0.6859 | 0 | 0 | 0 | 1 Ref      |
| KJ528544 | Unassigned | Unassigned | Unassigned | 99_0   | Clustered           | 5 VC_99_0    | 5   | 0.0694 | 0.98113835 | 0.0681 | 0 | 0 | 0 | 1 Ref      |
| KJ535721 | Unassigned | Unassigned | Unassigned | 753_0  | Clustered           | 26 VC_753_0  | 26  | 0.9562 | 1          | 0.9562 | 0 | 0 | 0 | 1 Ref      |
| KJ535722 | Unassigned | Unassigned | Unassigned | 753_0  | Clustered           | 26 VC_753_0  | 26  | 0.9562 | 1          | 0.9562 | 0 | 0 | 0 | 1 Ref      |
| KJ538721 | Unassigned | Unassigned | Unassigned | 973_0  | Clustered           | 15 VC_973_0  | 15  | 1      | 0          | 0      | 0 | 0 | 0 | 1 Ref      |
| KJ538722 | Unassigned | Unassigned | Unassigned | 834_0  | Clustered           | 18 VC_834_0  | 18  | 0.9116 | 1          | 0.9116 | 0 | 0 | 0 | 1 Ref      |
| KJ538723 | Unassigned | Unassigned | Unassigned | 384_3  | Clustered           | 22 VC_384_3  | 22  | 0.0786 | 1          | 0.0786 | 0 | 0 | 0 | 0.9048 Ref |
| KJ564036 | Unassigned | Unassigned | Unassigned | 657_0  | Clustered           | 7 VC_657_0   | 7   | 0.8495 | 1          | 0.8495 | 0 | 0 | 0 | 1 Ref      |
| KJ564037 | Unassigned | Unassigned | Unassigned | 657_0  | Clustered           | 7 VC_657_0   | 7   | 0.8495 | 1          | 0.8495 | 0 | 0 | 0 | 1 Ref      |
| KJ564038 | Unassigned | Unassigned | Unassigned | 657_0  | Clustered           | 7 VC_657_0   | 7   | 0.8495 | 1          | 0.8495 | 0 | 0 | 0 | 1 Ref      |
| KJ567042 | Unassigned | Unassigned | Unassigned | 245_0  | Clustered           | 17 VC_245_0  | 17  | 0.6081 | 1          | 0.6081 | 0 | 0 | 0 | 1 Ref      |
| KJ567043 | Unassigned | Unassigned | Unassigned | 583_0  | Clustered           | 2 VC_583_0   | 2   | 0.0713 | 0.956426   | 0.0682 | 0 | 0 | 0 | 1 Ref      |
| KJ567044 | Unassigned | Unassigned | Unassigned | 384_2  | Clustered           | 8 VC_384_2   | 8   | 0.0232 | 1          | 0.0232 | 0 | 0 | 0 | 0.8571 Ref |
| KJ567045 | Unassigned | Unassigned | Unassigned | 243_0  | Clustered           | 72 VC_243_0  | 72  | 0.8089 | 1          | 0.8089 | 0 | 0 | 0 | 1 Ref      |
| KJ567046 | Unassigned | Unassigned | Unassigned | 587_0  | Clustered           | 8 VC_587_0   | 8   | 0.4907 | 1          | 0.4907 | 0 | 0 | 0 | 1 Ref      |
| KJ572844 | Unassigned | Unassigned | Unassigned | 123_0  | Clustered           | 4 VC_123_0   | 4   | 0.1802 | 0.99998531 | 0.1802 | 0 | 0 | 0 | 1 Ref      |
| KJ578758 | Unassigned | Unassigned | Unassigned | 787_0  | Clustered           | 132 VC_787_0 | 132 | 1      | 1          | 1      | 0 | 0 | 0 | 1 Ref      |
| KJ578759 | Unassigned | Unassigned | Unassigned | 787_0  | Clustered           | 132 VC_787_0 | 132 | 1      | 1          | 1      | 0 | 0 | 0 | 1 Ref      |
| KJ578760 | Unassigned | Unassigned | Unassigned | 787_0  | Clustered           | 132 VC_787_0 | 132 | 1      | 1          | 1      | 0 | 0 | 0 | 1 Ref      |
| KJ578761 | Unassigned | Unassigned | Unassigned | 787_0  | Clustered           | 132 VC_787_0 | 132 | 1      | 1          | 1      | 0 | 0 | 0 | 1 Ref      |
| KJ578762 | Unassigned | Unassigned | Unassigned | 787_0  | Clustered           | 132 VC_787_0 | 132 | 1      | 1          | 1      | 0 | 0 | 0 | 1 Ref      |
| KJ578763 | Unassigned | Unassigned | Unassigned | 787_0  | Clustered           | 132 VC_787_0 | 132 | 1      | 1          | 1      | 0 | 0 | 0 | 1 Ref      |
| KJ578764 | Unassigned | Unassigned | Unassigned | 787_0  | Clustered           | 132 VC_787_0 | 132 | 1      | 1          | 1      | 0 | 0 | 0 | 1 Ref      |
| KJ578765 | Unassigned | Unassigned | Unassigned | 787_0  | Clustered           | 132 VC_787_0 | 132 | 1      | 1          | 1      | 0 | 0 | 0 | 1 Ref      |
| KJ578766 | Unassigned | Unassigned | Unassigned | 787_0  | Clustered           | 132 VC_787_0 | 132 | 1      | 1          | 1      | 0 | 0 | 0 | 1 Ref      |
| KJ578767 | Unassigned | Unassigned | Unassigned | 787_0  | Clustered           | 132 VC_787_0 | 132 | 1      | 1          | 1      | 0 | 0 | 0 | 1 Ref      |
| KJ578768 | Unassigned | Unassigned | Unassigned | 787_0  | Clustered           | 132 VC_787_0 | 132 | 1      | 1          | 1      | 0 | 0 | 0 | 1 Ref      |
| KJ578769 | Unassigned | Unassigned | Unassigned | 787_0  | Clustered           | 132 VC_787_0 | 132 | 1      | 1          | 1      | 0 | 0 | 0 | 1 Ref      |
| KJ578770 | Unassigned | Unassigned | Unassigned | 787_0  | Clustered           | 132 VC_787_0 | 132 | 1      | 1          | 1      | 0 | 0 | 0 | 1 Ref      |
| KJ578771 | Unassigned | Unassigned | Unassigned | 787_0  | Clustered           | 132 VC_787_0 | 132 | 1      | 1          | 1      | 0 | 0 | 0 | 1 Ref      |
| KJ578772 | Unassigned | Unassigned | Unassigned | 787_0  | Clustered           | 132 VC_787_0 | 132 | 1      | 1          | 1      | 0 | 0 | 0 | 1 Ref      |
| KJ578773 | Unassigned | Unassigned | Unassigned | 787_0  | Clustered           | 132 VC_787_0 | 132 | 1      | 1          | 1      | 0 | 0 | 0 | 1 Ref      |
| KJ578774 | Unassigned | Unassigned | Unassigned | 787_0  | Clustered           | 132 VC_787_0 | 132 | 1      | 1          | 1      | 0 | 0 | 0 | 1 Ref      |
| KJ578775 | Unassigned | Unassigned | Unassigned | 787_0  | Clustered           | 132 VC_787_0 | 132 | 1      | 1          | 1      | 0 | 0 | 0 | 1 Ref      |
| KJ578776 | Unassigned | Unassigned | Unassigned | 787_0  | Clustered           | 132 VC_787_0 | 132 | 1      | 1          | 1      | 0 | 0 | 0 | 1 Ref      |
| KJ578777 | Unassigned | Unassigned | Unassigned | 787_0  | Clustered           | 132 VC_787_0 | 132 | 1      | 1          | 1      | 0 | 0 | 0 | 1 Ref      |
| KJ578778 | Unassigned | Unassigned | Unassigned | 787_0  | Clustered           | 132 VC_787_0 | 132 | 1      | 1          | 1      | 0 | 0 | 0 | 1 Ref      |
| KJ578779 | Unassigned | Unassigned | Unassigned | 787_0  | Clustered           | 132 VC_787_0 | 132 | 1      | 1          | 1      | 0 | 0 | 0 | 1 Ref      |
| KJ578780 | Unassigned | Unassigned | Unassigned | 787_0  | Clustered           | 132 VC_787_0 | 132 | 1      | 1          | 1      | 0 | 0 | 0 | 1 Ref      |
| KJ578781 | Unassigned | Unassigned | Unassigned | 787_0  | Clustered           | 132 VC_787_0 | 132 | 1      | 1          | 1      | 0 | 0 | 0 | 1 Ref      |
| KJ578782 | Unassigned | Unassigned | Unassigned | 787_0  | Clustered           | 132 VC_787_0 | 132 | 1      | 1          | 1      | 0 | 0 | 0 | 1 Ref      |
| KJ578783 | Unassigned | Unassigned | Unassigned | 787_0  | Clustered           | 132 VC_787_0 | 132 | 1      | 1          | 1      | 0 | 0 | 0 | 1 Ref      |
| KJ578784 | Unassigned | Unassigned | Unassigned | 787_0  | Clustered           | 132 VC_787_0 | 132 | 1      | 1          | 1      | 0 | 0 | 0 | 1 Ref      |
| KJ578785 | Unassigned | Unassigned | Unassigned | 787_0  | Clustered           | 132 VC_787_0 | 132 | 1      | 1          | 1      | 0 | 0 | 0 | 1 Ref      |
| KJ578786 | Unassigned | Unassigned | Unassigned | 787_0  | Clustered           | 132 VC_787_0 | 132 | 1      | 1          | 1      | 0 | 0 | 0 | 1 Ref      |
| KJ578787 | Unassigned | Unassigned | Unassigned | 787_0  | Clustered           | 132 VC_787_0 | 132 | 1      | 1          | 1      | 0 | 0 | 0 | 1 Ref      |
| KJ578788 | Unassigned | Unassigned | Unassigned | 787_0  | Clustered           | 132 VC_787_0 | 132 | 1      | 1          | 1      | 0 | 0 | 0 | 1 Ref      |
| KJ578789 | Unassigned | Unassigned | Unassigned | 787_0  | Clustered           | 132 VC_787_0 | 132 | 1      | 1          | 1      | 0 | 0 | 0 | 1 Ref      |
| KJ578790 | Unassigned | Unassigned | Unassigned | 787_0  | Clustered           | 132 VC_787_0 | 132 | 1      | 1          | 1      | 0 | 0 | 0 | 1 Ref      |
| KJ578791 | Unassigned | Unassigned | Unassigned | 787_0  | Clustered           | 132 VC_787_0 | 132 | 1      | 1          | 1      | 0 | 0 | 0 | 1 Ref      |
| KJ578792 | Unassigned | Unassigned | Unassigned | 787_0  | Clustered           | 132 VC_787_0 | 132 | 1      | 1          | 1      | 0 | 0 | 0 | 1 Ref      |
| KJ586794 | Unassigned | Unassigned | Unassigned | 753_0  | Clustered           | 26 VC_753_0  | 26  | 0.9562 | 1          | 0.9562 | 0 | 0 | 0 | 1 Ref      |
| KJ586795 | Unassigned | Unassigned | Unassigned | 753_0  | Clustered           | 26 VC_753_0  | 26  | 0.9562 | 1          | 0.9562 | 0 | 0 | 0 | 1 Ref      |
| KJ591604 | Unassigned | Unassigned | Unassigned | 753_0  | Clustered           | 26 VC_753_0  | 26  | 0.9562 | 1          | 0.9562 | 0 | 0 | 0 | 1 Ref      |
| KJ591605 | Unassigned | Unassigned | Unassigned | 753_0  | Clustered           | 26 VC_753_0  | 26  | 0.9562 | 1          | 0.9562 | 0 | 0 | 0 | 1 Ref      |
| KJ595575 | Unassigned | Unassigned | Unassigned | 579_50 | Clustered           | 15 VC_579_50 | 15  | 0.0467 | 1          | 0.0467 | 0 | 0 | 0 | 0.9238 Ref |
| KJ595576 | Unassigned | Unassigned | Unassigned | 384_1  | Clustered           | 11 VC_384_1  | 11  | 0.0378 | 1          | 0.0378 | 0 | 0 | 0 | 0.8545 Ref |
| KJ596420 | Unassigned | Unassigned | Unassigned | 10_0   | Clustered           | 25 VC_10_0   | 25  | 0.3437 | 1          | 0.3437 | 0 | 0 | 0 | 0.9733 Ref |
| KJ603229 | Unassigned | Unassigned | Unassigned | 48_0   | Clustered           | 2 VC_48_0    | 2   | 0.018  | 0.95763863 | 0.0172 | 0 | 0 | 0 | 1 Ref      |
| KJ608189 | Unassigned | Unassigned | Unassigned | 336_0  | Clustered/Singleton | 1 VC_336_0   | 1   | 0      | 1          | 0      | 0 | 0 | 0 | 1 Ref      |
| KJ617393 | Unassigned | Unassigned | Unassigned | 1089_0 | Clustered           | 3 VC_1089_0  | 3   | 1      | 1          | 1      | 0 | 0 | 0 | 1 Ref      |
| KJ619459 | Unassigned | Unassigned | Unassigned | 904_0  | Clustered           | 10 VC_904_0  | 10  | 0.9878 | 0.99948433 | 0.9873 | 0 | 0 | 0 | 1 Ref      |
| KJ621082 | Unassigned | Unassigned | Unassigned | 857_0  | Clustered           | 16 VC_857_0  | 16  | 0.9317 | 1          | 0.9317 | 0 | 0 | 0 | 1 Ref      |



|          |            |            |            |        |                     |              |     |        |            |        |   |   |   |            |
|----------|------------|------------|------------|--------|---------------------|--------------|-----|--------|------------|--------|---|---|---|------------|
| KJ628499 | Unassigned | Unassigned | Unassigned | 715_0  | Clustered           | 10 VC_715_0  | 10  | 0.8045 | 1          | 0.8045 | 0 | 0 | 0 | 1 Ref      |
| KJ668713 | Unassigned | Unassigned | Unassigned | 469_0  | Clustered           | 18 VC_469_0  | 18  | 0.4583 | 1          | 0.4583 | 0 | 0 | 0 | 1 Ref      |
| KJ668714 | Unassigned | Unassigned | Unassigned | 290_99 | Clustered/Singleton | 1 VC_290_99  | 1   | 0      | 1          | 0      | 0 | 0 | 0 | 1 Ref      |
| KJ668715 | Unassigned | Unassigned | Unassigned | 753_0  | Clustered           | 26 VC_753_0  | 26  | 0.9562 | 1          | 0.9562 | 0 | 0 | 0 | 1 Ref      |
| KJ676859 | Unassigned | Unassigned | Unassigned | 195_2  | Clustered           | 2 VC_195_2   | 2   | 0.0208 | 0.93079499 | 0.0193 | 0 | 0 | 0 | 1 Ref      |
| KJ690250 | Unassigned | Unassigned | Unassigned | 335_53 | Clustered           | 2 VC_335_53  | 2   | 0.0039 | 0.95663826 | 0.0037 | 0 | 0 | 0 | 1 Ref      |
| KJ716334 | Unassigned | Unassigned | Unassigned | 9_0    | Clustered           | 38 VC_9_0    | 38  | 0.4859 | 1          | 0.4859 | 0 | 0 | 0 | 1 Ref      |
| KJ716335 | Unassigned | Unassigned | Unassigned | 133_0  | Clustered           | 17 VC_133_0  | 17  | 0.2654 | 1          | 0.2654 | 0 | 0 | 0 | 1 Ref      |
| KJ722067 | Unassigned | Unassigned | Unassigned | 787_0  | Clustered           | 132 VC_787_0 | 132 | 1      | 1          | 1      | 0 | 0 | 0 | 1 Ref      |
| KJ725374 | Unassigned | Unassigned | Unassigned | 783_0  | Clustered           | 67 VC_783_0  | 67  | 0.8945 | 1          | 0.8945 | 0 | 0 | 0 | 1 Ref      |
| KJ746502 | Unassigned | Unassigned | Unassigned | 22_0   | Clustered           | 4 VC_22_0    | 4   | 0.562  | 0.91257778 | 0.5129 | 0 | 0 | 0 | 0.6667 Ref |
| KJ748011 | Unassigned | Unassigned | Unassigned | 465_0  | Clustered           | 80 VC_465_0  | 80  | 0.9988 | 1          | 0.9988 | 0 | 0 | 0 | 1 Ref      |
| KJ801817 | Unassigned | Unassigned | Unassigned | 93_0   | Clustered           | 22 VC_93_0   | 22  | 0.5285 | 1          | 0.5285 | 0 | 0 | 0 | 1 Ref      |
| KJ802832 | Unassigned | Unassigned | Unassigned | 1090_0 | Clustered           | 8 VC_1090_0  | 8   | 0.6377 | 1          | 0.6377 | 0 | 0 | 0 | 1 Ref      |
| KJ803031 | Unassigned | Unassigned | Unassigned | 857_0  | Clustered           | 16 VC_857_0  | 16  | 0.9317 | 1          | 0.9317 | 0 | 0 | 0 | 1 Ref      |
| KJ804259 | Unassigned | Unassigned | Unassigned | 685_0  | Clustered           | 7 VC_685_0   | 7   | 0.4045 | 1          | 0.4045 | 0 | 0 | 0 | 1 Ref      |
| KJ817802 | Unassigned | Unassigned | Unassigned | 713_0  | Clustered           | 26 VC_713_0  | 26  | 0.9358 | 1          | 0.9358 | 0 | 0 | 0 | 1 Ref      |
| KJ829260 | Unassigned | Unassigned | Unassigned | 577_0  | Clustered           | 21 VC_577_0  | 21  | 0.9908 | 1          | 0.9908 | 0 | 0 | 0 | 1 Ref      |
| KJ832078 | Unassigned | Unassigned | Unassigned | 32_1   | Clustered           | 16 VC_32_1   | 16  | 0.1962 | 1          | 0.1962 | 0 | 0 | 0 | 0.8333 Ref |
| KJ847052 | Unassigned | Unassigned | Unassigned | 958_0  | Clustered           | 3 VC_958_0   | 3   | 0.2752 | 0.95138727 | 0.2618 | 0 | 0 | 0 | 1 Ref      |
| KJ858521 | Unassigned | Unassigned | Unassigned | 817_0  | Clustered           | 12 VC_817_0  | 12  | 0.8497 | 1          | 0.8497 | 0 | 0 | 0 | 1 Ref      |
| KJ888149 | Unassigned | Unassigned | Unassigned | 155_16 | Clustered/Singleton | 1 VC_155_16  | 1   | 0      | 1          | 0      | 0 | 0 | 0 | 1 Ref      |
| KJ909655 | Unassigned | Unassigned | Unassigned | 35_0   | Clustered           | 35 VC_35_0   | 35  | 0.431  | 1          | 0.431  | 0 | 0 | 0 | 1 Ref      |
| KJ936628 | Unassigned | Unassigned | Unassigned | 548_0  | Clustered           | 9 VC_548_0   | 9   | 0.8018 | 1          | 0.8018 | 0 | 0 | 0 | 1 Ref      |
| KJ944841 | Unassigned | Unassigned | Unassigned | 241_0  | Clustered           | 21 VC_241_0  | 21  | 0.8342 | 1          | 0.8342 | 0 | 0 | 0 | 1 Ref      |
| KJ959591 | Unassigned | Unassigned | Unassigned | 764_0  | Clustered           | 23 VC_764_0  | 23  | 0.8194 | 1          | 0.8194 | 0 | 0 | 0 | 1 Ref      |
| KJ959632 | Unassigned | Unassigned | Unassigned | 223_4  | Clustered           | 13 VC_223_4  | 13  | 0.1649 | 1          | 0.1649 | 0 | 0 | 0 | 1 Ref      |
| KJ997912 | Unassigned | Unassigned | Unassigned | 310_0  | Clustered           | 155 VC_310_0 | 155 | 0.9979 | 1          | 0.9979 | 0 | 0 | 0 | 1 Ref      |
| KM044272 | Unassigned | Unassigned | Unassigned | 837_1  | Clustered           | 24 VC_837_1  | 24  | 0.5328 | 1          | 0.5328 | 0 | 0 | 0 | 1 Ref      |
| KM051843 | Unassigned | Unassigned | Unassigned | 87_0   | Clustered           | 3 VC_87_0    | 3   | 0.0416 | 0.99823485 | 0.0415 | 0 | 0 | 0 | 1 Ref      |
| KM058087 | Unassigned | Unassigned | Unassigned | 1092_0 | Clustered           | 2 VC_1092_0  | 2   | 1      | 1          | 1      | 0 | 0 | 0 | 1 Ref      |
| KM067278 | Unassigned | Unassigned | Unassigned | 434_0  | Clustered           | 45 VC_434_0  | 45  | 0.9479 | 1          | 0.9479 | 0 | 0 | 0 | 1 Ref      |
| KM091442 | Unassigned | Unassigned | Unassigned | 210_0  | Clustered           | 105 VC_210_0 | 105 | 0.4076 | 1          | 0.4076 | 0 | 0 | 0 | 0.7766 Ref |
| KM092515 | Unassigned | Unassigned | Unassigned | 340_17 | Clustered           | 4 VC_340_17  | 4   | 0.0161 | 0.99996247 | 0.0161 | 0 | 0 | 0 | 1 Ref      |
| KM101117 | Unassigned | Unassigned | Unassigned | 526_0  | Clustered           | 32 VC_526_0  | 32  | 0.9037 | 1          | 0.9037 | 0 | 0 | 0 | 1 Ref      |
| KM101118 | Unassigned | Unassigned | Unassigned | 974_0  | Clustered           | 34 VC_974_0  | 34  | 0.7953 | 1          | 0.7953 | 0 | 0 | 0 | 1 Ref      |
| KM101119 | Unassigned | Unassigned | Unassigned | 532_0  | Clustered           | 75 VC_532_0  | 75  | 0.9393 | 1          | 0.9393 | 0 | 0 | 0 | 1 Ref      |
| KM101120 | Unassigned | Unassigned | Unassigned | 533_0  | Clustered           | 16 VC_533_0  | 16  | 0.3765 | 1          | 0.3765 | 0 | 0 | 0 | 1 Ref      |
| KM101122 | Unassigned | Unassigned | Unassigned | 538_49 | Clustered/Singleton | 1 VC_538_49  | 1   | 0      | 1          | 0      | 0 | 0 | 0 | 1 Ref      |
| KM101123 | Unassigned | Unassigned | Unassigned | 566_7  | Clustered           | 1 VC_566_7   | 4   | 0.0409 | 0.99661604 | 0.0408 | 0 | 0 | 0 | 1 Ref      |
| KM190144 | Unassigned | Unassigned | Unassigned | 601_2  | Clustered/Singleton | 1 VC_601_2   | 1   | 0      | 1          | 0      | 0 | 0 | 0 | 1 Ref      |
| KM197169 | Unassigned | Unassigned | Unassigned | 223_4  | Clustered           | 13 VC_223_4  | 13  | 0.1649 | 1          | 0.1649 | 0 | 1 | 0 | 1 Ref      |
| KM199770 | Unassigned | Unassigned | Unassigned | 1093_3 | Clustered           | 5 VC_1093_3  | 5   | 0.1846 | 0.98656422 | 0.1822 | 0 | 0 | 0 | 1 Ref      |
| KM209228 | Unassigned | Unassigned | Unassigned | 133_0  | Clustered           | 17 VC_133_0  | 17  | 0.2654 | 1          | 0.2654 | 0 | 0 | 0 | 1 Ref      |
| KM209270 | Unassigned | Unassigned | Unassigned | 133_0  | Clustered           | 17 VC_133_0  | 17  | 0.2654 | 1          | 0.2654 | 0 | 0 | 0 | 1 Ref      |
| KM209320 | Unassigned | Unassigned | Unassigned | 133_0  | Clustered           | 17 VC_133_0  | 17  | 0.2654 | 1          | 0.2654 | 0 | 0 | 0 | 1 Ref      |
| KM216423 | Unassigned | Unassigned | Unassigned | 155_15 | Clustered           | 16 VC_155_15 | 16  | 0.0779 | 1          | 0.0779 | 0 | 0 | 0 | 0.8083 Ref |
| KM224878 | Unassigned | Unassigned | Unassigned | 771_0  | Clustered           | 8 VC_771_0   | 8   | 0.7491 | 1          | 0.7491 | 0 | 0 | 0 | 1 Ref      |
| KM224879 | Unassigned | Unassigned | Unassigned | 771_0  | Clustered           | 8 VC_771_0   | 8   | 0.7491 | 1          | 0.7491 | 0 | 0 | 0 | 1 Ref      |
| KM233151 | Unassigned | Unassigned | Unassigned | 859_0  | Clustered           | 67 VC_859_0  | 67  | 0.9622 | 1          | 0.9622 | 0 | 0 | 0 | 1 Ref      |
| KM233261 | Unassigned | Unassigned | Unassigned | 938_0  | Clustered           | 3 VC_938_0   | 3   | 0.6623 | 0.99633114 | 0.6599 | 0 | 0 | 0 | 1 Ref      |
| KM233454 | Unassigned | Unassigned | Unassigned | 532_0  | Clustered           | 75 VC_532_0  | 75  | 0.9393 | 1          | 0.9393 | 0 | 0 | 0 | 1 Ref      |
| KM233455 | Unassigned | Unassigned | Unassigned | 532_0  | Clustered           | 75 VC_532_0  | 75  | 0.9393 | 1          | 0.9393 | 0 | 0 | 0 | 1 Ref      |
| KM233689 | Unassigned | Unassigned | Unassigned | 185_0  | Clustered           | 53 VC_185_0  | 53  | 0.9153 | 1          | 0.9153 | 0 | 0 | 0 | 1 Ref      |
| KM236237 | Unassigned | Unassigned | Unassigned | 687_1  | Clustered           | 10 VC_687_1  | 10  | 0.1263 | 1          | 0.1263 | 0 | 0 | 0 | 0.9778 Ref |
| KM236239 | Unassigned | Unassigned | Unassigned | 341_0  | Clustered           | 27 VC_341_0  | 27  | 0.5058 | 1          | 0.5058 | 0 | 0 | 0 | 0.8661 Ref |
| KM236241 | Unassigned | Unassigned | Unassigned | 603_0  | Clustered           | 28 VC_603_0  | 28  | 0.7692 | 1          | 0.7692 | 0 | 0 | 0 | 1 Ref      |
| KM236242 | Unassigned | Unassigned | Unassigned | 802_0  | Clustered           | 8 VC_802_0   | 8   | 0.5141 | 1          | 0.5141 | 0 | 0 | 0 | 1 Ref      |
| KM236243 | Unassigned | Unassigned | Unassigned | 819_0  | Clustered           | 19 VC_819_0  | 19  | 0.6835 | 1          | 0.6835 | 0 | 0 | 0 | 1 Ref      |
| KM236244 | Unassigned | Unassigned | Unassigned | 199_19 | Clustered           | 12 VC_199_19 | 12  | 0.0651 | 1          | 0.0651 | 0 | 0 | 0 | 0.8636 Ref |
| KM236245 | Unassigned | Unassigned | Unassigned | 87_9   | Clustered/Singleton | 1 VC_87_9    | 1   | 0      | 1          | 0      | 0 | 0 | 0 | 1 Ref      |
| KM236246 | Unassigned | Unassigned | Unassigned | 87_7   | Clustered/Singleton | 1 VC_87_7    | 1   | 0      | 1          | 0      | 0 | 0 | 0 | 1 Ref      |
| KM236247 | Unassigned | Unassigned | Unassigned | 1071_0 | Clustered           | 7 VC_1071_0  | 7   | 0.9883 | 0.99999504 | 0.9883 | 0 | 0 | 0 | 1 Ref      |
| KM236248 | Unassigned | Unassigned | Unassigned | 1071_0 | Clustered           | 7 VC_1071_0  | 7   | 0.9883 | 0.99999504 | 0.9883 | 0 | 0 | 0 | 1 Ref      |
| KM236502 | Unassigned | Unassigned | Unassigned | 384_3  | Clustered           | 22 VC_384_3  | 22  | 0.0786 | 1          | 0.0786 | 0 | 0 | 0 | 0.9048 Ref |
| KM242061 | Unassigned | Unassigned | Unassigned | 405_0  | Clustered           | 126 VC_405_0 | 126 | 0.9614 | 1          | 0.9614 | 0 | 0 | 0 | 1 Ref      |
| KM247287 | Unassigned | Unassigned | Unassigned | 162_0  | Clustered           | 12 VC_162_0  | 12  | 0.9051 | 1          | 0.9051 | 0 | 0 | 0 | 1 Ref      |
| KM253764 | Unassigned | Unassigned | Unassigned | 398_0  | Clustered           | 51 VC_398_0  | 51  | 0.8741 | 1          | 0.8741 | 0 | 0 | 0 | 1 Ref      |
| KM262191 | Unassigned | Unassigned | Unassigned | 889_0  | Clustered           | 13 VC_889_0  | 13  | 0.6844 | 1          | 0.6844 | 0 | 0 | 0 | 1 Ref      |
| KM262192 | Unassigned | Unassigned | Unassigned | 889_0  | Clustered           | 13 VC_889_0  | 13  | 0.6844 | 1          | 0.6844 | 0 | 0 | 0 | 1 Ref      |
| KM272358 | Unassigned | Unassigned | Unassigned | 654_2  | Clustered           | 2 VC_654_2   | 2   | 0.0038 | 0.92844927 | 0.0035 | 0 | 0 | 0 | 1 Ref      |
| KM279937 | Unassigned | Unassigned | Unassigned | 538_56 | Clustered/Singleton | 1 VC_538_56  | 1   | 0      | 1          | 0      | 0 | 0 | 0 | 1 Ref      |
| KM289195 | Unassigned | Unassigned | Unassigned | 653_0  | Clustered           | 9 VC_653_0   | 9   | 0.2315 | 1          | 0.2315 | 0 | 0 | 0 | 0.9722 Ref |
| KM347889 | Unassigned | Unassigned | Unassigned | 538_68 | Clustered/Singleton | 1 VC_538_68  | 1   | 0      | 1          | 0      | 0 | 0 | 0 | 1 Ref      |
| KM347890 | Unassigned | Unassigned | Unassigned | 384_1  | Clustered           | 11 VC_384_1  | 11  | 0.0378 | 1          | 0.0378 | 0 | 0 | 0 | 0.8545 Ref |
| KM359505 | Unassigned | Unassigned | Unassigned | 446_8  | Clustered/Singleton | 1 VC_446_8   | 1   | 0      | 1          | 0      | 0 | 0 | 0 | 1 Ref      |
| KM360178 | Unassigned | Unassigned | Unassigned | 127_0  | Clustered           | 17 VC_127_0  | 17  | 0.9222 | 1          | 0.9222 | 0 | 0 | 0 | 1 Ref      |
| KM363596 | Unassigned | Unassigned | Unassigned | 245_0  | Clustered           | 17 VC_245_0  | 17  | 0.6081 | 1          | 0.6081 | 0 | 0 | 0 | 1 Ref      |
| KM363597 | Unassigned | Unassigned | Unassigned | 384_13 | Clustered           | 33 VC_384_13 | 33  | 0.1785 | 1          | 0.1785 | 0 | 0 | 0 | 0.8769 Ref |
| KM366096 | Unassigned | Unassigned | Unassigned | 399_0  | Clustered           | 49 VC_399_0  | 49  | 0.7927 | 1          | 0.7927 | 0 | 0 | 0 | 1 Ref      |
| KM366097 | Unassigned | Unassigned | Unassigned | 466_0  | Clustered           | 66 VC_466_0  | 66  | 0.9246 | 1          | 0.9246 | 0 | 0 | 0 | 1 Ref      |



|          |            |            |            |         |                     |              |    |        |            |        |   |   |   |            |
|----------|------------|------------|------------|---------|---------------------|--------------|----|--------|------------|--------|---|---|---|------------|
| KM366098 | Unassigned | Unassigned | Unassigned | 611_0   | Clustered           | 50 VC_611_0  | 50 | 0.7306 | 1          | 0.7306 | 0 | 0 | 0 | 1 Ref      |
| KM366099 | Unassigned | Unassigned | Unassigned | 440_0   | Clustered           | 33 VC_440_0  | 33 | 0.992  | 1          | 0.992  | 0 | 0 | 0 | 1 Ref      |
| KM366100 | Unassigned | Unassigned | Unassigned | 98_0    | Clustered           | 30 VC_98_0   | 30 | 0.7175 | 1          | 0.7175 | 0 | 0 | 0 | 1 Ref      |
| KM370384 | Unassigned | Unassigned | Unassigned | 466_0   | Clustered           | 66 VC_466_0  | 66 | 0.9246 | 1          | 0.9246 | 0 | 0 | 0 | 1 Ref      |
| KM373208 | Unassigned | Unassigned | Unassigned | 753_0   | Clustered           | 26 VC_753_0  | 26 | 0.9562 | 1          | 0.9562 | 0 | 0 | 0 | 1 Ref      |
| KM389210 | Unassigned | Unassigned | Unassigned | 304_0   | Clustered           | 5 VC_304_0   | 5  | 0.1053 | 0.99999993 | 0.1053 | 0 | 0 | 0 | 0.9 Ref    |
| KM400683 | Unassigned | Unassigned | Unassigned | 566_2   | Clustered           | 3 VC_566_2   | 3  | 0.0275 | 0.85806939 | 0.0236 | 0 | 0 | 0 | 1 Ref      |
| KM401838 | Unassigned | Unassigned | Unassigned | 230_0   | Clustered           | 38 VC_230_0  | 38 | 0.9076 | 1          | 0.9076 | 0 | 0 | 0 | 1 Ref      |
| KM402757 | Unassigned | Unassigned | Unassigned | 538_92  | Clustered           | 5 VC_538_92  | 5  | 0.0653 | 0.99999997 | 0.0653 | 0 | 0 | 0 | 1 Ref      |
| KM407600 | Unassigned | Unassigned | Unassigned | 293_10  | Clustered           | 9 VC_293_10  | 9  | 0.0615 | 0.99999884 | 0.0615 | 0 | 0 | 0 | 0.6667 Ref |
| KM408320 | Unassigned | Unassigned | Unassigned | 384_15  | Clustered           | 44 VC_384_15 | 44 | 0.139  | 1          | 0.139  | 0 | 0 | 0 | 0.7474 Ref |
| KM411958 | Unassigned | Unassigned | Unassigned | 862_0   | Clustered           | 29 VC_862_0  | 29 | 0.8594 | 1          | 0.8594 | 0 | 0 | 0 | 1 Ref      |
| KM411959 | Unassigned | Unassigned | Unassigned | 862_0   | Clustered           | 29 VC_862_0  | 29 | 0.8594 | 1          | 0.8594 | 0 | 0 | 0 | 1 Ref      |
| KM411960 | Unassigned | Unassigned | Unassigned | 862_0   | Clustered           | 29 VC_862_0  | 29 | 0.8594 | 1          | 0.8594 | 0 | 0 | 0 | 1 Ref      |
| KM434184 | Unassigned | Unassigned | Unassigned | 80_8    | Clustered/Singleton | 1 VC_80_8    | 1  | 0      | 1          | 0      | 0 | 0 | 0 | 1 Ref      |
| KM434185 | Unassigned | Unassigned | Unassigned | 766_0   | Clustered           | 40 VC_766_0  | 40 | 0.7511 | 1          | 0.7511 | 0 | 0 | 0 | 1 Ref      |
| KM434186 | Unassigned | Unassigned | Unassigned | 78_0    | Clustered           | 20 VC_78_0   | 20 | 0.9639 | 1          | 0.9639 | 0 | 0 | 0 | 1 Ref      |
| KM458633 | Unassigned | Unassigned | Unassigned | 611_0   | Clustered           | 50 VC_611_0  | 50 | 0.7306 | 1          | 0.7306 | 0 | 0 | 0 | 1 Ref      |
| KM463009 | Unassigned | Unassigned | Unassigned | 223_6   | Clustered           | 42 VC_223_6  | 42 | 0.4717 | 1          | 0.4717 | 0 | 0 | 0 | 0.8351 Ref |
| KM501444 | Unassigned | Unassigned | Unassigned | 290_145 | Clustered/Singleton | 1 VC_290_145 | 1  | 0      | 1          | 0      | 0 | 0 | 0 | 1 Ref      |
| KM507819 | Unassigned | Unassigned | Unassigned | 170_11  | Clustered           | 10 VC_170_11 | 10 | 0.1502 | 0.99999797 | 0.1502 | 0 | 0 | 0 | 0.9111 Ref |
| KM576124 | Unassigned | Unassigned | Unassigned | 113_0   | Clustered           | 91 VC_113_0  | 91 | 0.9584 | 1          | 0.9584 | 0 | 0 | 0 | 1 Ref      |
| KM581061 | Unassigned | Unassigned | Unassigned | 612_0   | Clustered           | 5 VC_612_0   | 5  | 0.4531 | 0.99999995 | 0.4531 | 0 | 0 | 0 | 1 Ref      |
| KM588359 | Unassigned | Unassigned | Unassigned | 539_0   | Clustered           | 37 VC_539_0  | 37 | 0.911  | 1          | 0.911  | 0 | 0 | 0 | 1 Ref      |
| KM589498 | Unassigned | Unassigned | Unassigned | 1095_0  | Clustered           | 12 VC_1095_0 | 12 | 0.2819 | 0.99837092 | 0.2814 | 0 | 0 | 0 | 1 Ref      |
| KM589499 | Unassigned | Unassigned | Unassigned | 1103_0  | Clustered           | 2 VC_1103_0  | 2  | 0.7048 | 0.76024994 | 0.5358 | 0 | 0 | 0 | 1 Ref      |
| KM589500 | Unassigned | Unassigned | Unassigned | 1104_0  | Clustered           | 44 VC_1104_0 | 44 | 0.9574 | 0.72818579 | 0.6972 | 0 | 0 | 0 | 1 Ref      |
| KM589502 | Unassigned | Unassigned | Unassigned | 1028_0  | Clustered           | 69 VC_1028_0 | 69 | 0.8547 | 1          | 0.8547 | 0 | 0 | 0 | 1 Ref      |
| KM589503 | Unassigned | Unassigned | Unassigned | 1104_0  | Clustered           | 44 VC_1104_0 | 44 | 0.9574 | 0.72818579 | 0.6972 | 0 | 0 | 0 | 1 Ref      |
| KM589504 | Unassigned | Unassigned | Unassigned | 1104_0  | Clustered           | 44 VC_1104_0 | 44 | 0.9574 | 0.72818579 | 0.6972 | 0 | 0 | 0 | 1 Ref      |
| KM589505 | Unassigned | Unassigned | Unassigned | 1104_0  | Clustered           | 44 VC_1104_0 | 44 | 0.9574 | 0.72818579 | 0.6972 | 0 | 0 | 0 | 1 Ref      |
| KM589507 | Unassigned | Unassigned | Unassigned | 1103_0  | Clustered           | 2 VC_1103_0  | 2  | 0.7048 | 0.76024994 | 0.5358 | 0 | 0 | 0 | 1 Ref      |
| KM589508 | Unassigned | Unassigned | Unassigned | 1108_0  | Clustered           | 52 VC_1108_0 | 52 | 0.7674 | 1          | 0.7674 | 0 | 0 | 0 | 1 Ref      |
| KM589509 | Unassigned | Unassigned | Unassigned | 1104_0  | Clustered           | 44 VC_1104_0 | 44 | 0.9574 | 0.72818579 | 0.6972 | 0 | 0 | 0 | 1 Ref      |
| KM589510 | Unassigned | Unassigned | Unassigned | 1104_0  | Clustered           | 44 VC_1104_0 | 44 | 0.9574 | 0.72818579 | 0.6972 | 0 | 0 | 0 | 1 Ref      |
| KM589511 | Unassigned | Unassigned | Unassigned | 1028_0  | Clustered           | 69 VC_1028_0 | 69 | 0.8547 | 1          | 0.8547 | 0 | 0 | 0 | 1 Ref      |
| KM589512 | Unassigned | Unassigned | Unassigned | 1104_0  | Clustered           | 44 VC_1104_0 | 44 | 0.9574 | 0.72818579 | 0.6972 | 0 | 0 | 0 | 1 Ref      |
| KM589513 | Unassigned | Unassigned | Unassigned | 1104_0  | Clustered           | 44 VC_1104_0 | 44 | 0.9574 | 0.72818579 | 0.6972 | 0 | 0 | 0 | 1 Ref      |
| KM589514 | Unassigned | Unassigned | Unassigned | 1111_0  | Clustered           | 5 VC_1111_0  | 5  | 1      | 1          | 1      | 0 | 0 | 0 | 1 Ref      |
| KM589515 | Unassigned | Unassigned | Unassigned | 1112_0  | Clustered           | 4 VC_1112_0  | 4  | 1      | 1          | 1      | 0 | 0 | 0 | 1 Ref      |
| KM589516 | Unassigned | Unassigned | Unassigned | 1112_0  | Clustered           | 4 VC_1112_0  | 4  | 1      | 1          | 1      | 0 | 0 | 0 | 1 Ref      |
| KM591905 | Unassigned | Unassigned | Unassigned | 1087_0  | Clustered           | 7 VC_1087_0  | 7  | 0.94   | 1          | 0.94   | 0 | 0 | 0 | 1 Ref      |
| KM591906 | Unassigned | Unassigned | Unassigned | 223_6   | Clustered           | 42 VC_223_6  | 42 | 0.4717 | 1          | 0.4717 | 0 | 0 | 0 | 0.8351 Ref |
| KM592966 | Unassigned | Unassigned | Unassigned | 531_0   | Clustered           | 32 VC_531_0  | 32 | 0.6859 | 1          | 0.6859 | 0 | 0 | 0 | 1 Ref      |
| KM597530 | Unassigned | Unassigned | Unassigned | 538_29  | Clustered/Singleton | 1 VC_538_29  | 1  | 0      | 1          | 0      | 0 | 0 | 0 | 1 Ref      |
| KM597531 | Unassigned | Unassigned | Unassigned | 335_49  | Clustered           | 17 VC_335_49 | 17 | 0.0731 | 1          | 0.0731 | 0 | 0 | 0 | 0.7721 Ref |
| KM606994 | Unassigned | Unassigned | Unassigned | 290_82  | Clustered           | 6 VC_290_82  | 6  | 0.0128 | 1          | 0.0128 | 0 | 0 | 0 | 1 Ref      |
| KM606995 | Unassigned | Unassigned | Unassigned | 290_82  | Clustered           | 6 VC_290_82  | 6  | 0.0128 | 1          | 0.0128 | 0 | 0 | 0 | 1 Ref      |
| KM606996 | Unassigned | Unassigned | Unassigned | 290_82  | Clustered           | 6 VC_290_82  | 6  | 0.0128 | 1          | 0.0128 | 0 | 0 | 0 | 1 Ref      |
| KM606997 | Unassigned | Unassigned | Unassigned | 290_82  | Clustered           | 6 VC_290_82  | 6  | 0.0128 | 1          | 0.0128 | 0 | 0 | 0 | 1 Ref      |
| KM606998 | Unassigned | Unassigned | Unassigned | 290_82  | Clustered           | 6 VC_290_82  | 6  | 0.0128 | 1          | 0.0128 | 0 | 0 | 0 | 1 Ref      |
| KM606999 | Unassigned | Unassigned | Unassigned | 290_82  | Clustered           | 6 VC_290_82  | 6  | 0.0128 | 1          | 0.0128 | 0 | 0 | 0 | 1 Ref      |
| KM607000 | Unassigned | Unassigned | Unassigned | 290_83  | Clustered/Singleton | 1 VC_290_83  | 1  | 0      | 1          | 0      | 0 | 0 | 0 | 1 Ref      |
| KM607001 | Unassigned | Unassigned | Unassigned | 290_94  | Clustered           | 2 VC_290_94  | 2  | 0.0026 | 0.95293762 | 0.0025 | 0 | 0 | 0 | 1 Ref      |
| KM607002 | Unassigned | Unassigned | Unassigned | 290_91  | Clustered           | 11 VC_290_91 | 11 | 0.0281 | 1          | 0.0281 | 0 | 0 | 0 | 1 Ref      |
| KM607003 | Unassigned | Unassigned | Unassigned | 290_91  | Clustered           | 11 VC_290_91 | 11 | 0.0281 | 1          | 0.0281 | 0 | 0 | 0 | 1 Ref      |
| KM607004 | Unassigned | Unassigned | Unassigned | 290_3   | Clustered           | 3 VC_290_3   | 3  | 0.0055 | 0.99676466 | 0.0054 | 0 | 0 | 0 | 1 Ref      |
| KM612259 | Unassigned | Unassigned | Unassigned | 627_0   | Clustered           | 16 VC_627_0  | 16 | 0.9168 | 1          | 0.9168 | 0 | 0 | 0 | 1 Ref      |
| KM612260 | Unassigned | Unassigned | Unassigned | 627_0   | Clustered           | 16 VC_627_0  | 16 | 0.9168 | 1          | 0.9168 | 0 | 0 | 0 | 1 Ref      |
| KM612261 | Unassigned | Unassigned | Unassigned | 627_0   | Clustered           | 16 VC_627_0  | 16 | 0.9168 | 1          | 0.9168 | 0 | 0 | 0 | 1 Ref      |
| KM612262 | Unassigned | Unassigned | Unassigned | 627_0   | Clustered           | 16 VC_627_0  | 16 | 0.9168 | 1          | 0.9168 | 0 | 0 | 0 | 1 Ref      |
| KM612263 | Unassigned | Unassigned | Unassigned | 627_0   | Clustered           | 16 VC_627_0  | 16 | 0.9168 | 1          | 0.9168 | 0 | 0 | 0 | 1 Ref      |
| KM612264 | Unassigned | Unassigned | Unassigned | 627_0   | Clustered           | 16 VC_627_0  | 16 | 0.9168 | 1          | 0.9168 | 0 | 0 | 0 | 1 Ref      |
| KM612265 | Unassigned | Unassigned | Unassigned | 627_0   | Clustered           | 16 VC_627_0  | 16 | 0.9168 | 1          | 0.9168 | 0 | 0 | 0 | 1 Ref      |
| KM652553 | Unassigned | Unassigned | Unassigned | 538_19  | Clustered           | 2 VC_538_19  | 2  | 0.0097 | 0.95761552 | 0.0093 | 0 | 0 | 0 | 1 Ref      |
| KM652554 | Unassigned | Unassigned | Unassigned | 1114_3  | Clustered           | 16 VC_1114_3 | 16 | 0.2336 | 1          | 0.2336 | 0 | 0 | 0 | 0.9667 Ref |
| KM657822 | Unassigned | Unassigned | Unassigned | 340_13  | Clustered/Singleton | 1 VC_340_13  | 1  | 0      | 1          | 0      | 0 | 0 | 0 | 1 Ref      |
| KM672662 | Unassigned | Unassigned | Unassigned | 717_0   | Clustered           | 5 VC_717_0   | 5  | 0.7757 | 0.99999988 | 0.7757 | 0 | 0 | 0 | 1 Ref      |
| KM677185 | Unassigned | Unassigned | Unassigned | 488_0   | Clustered           | 14 VC_488_0  | 14 | 0.8516 | 1          | 0.8516 | 0 | 0 | 0 | 1 Ref      |
| KM677210 | Unassigned | Unassigned | Unassigned | 223_4   | Clustered           | 13 VC_223_4  | 13 | 0.1649 | 1          | 0.1649 | 0 | 0 | 0 | 1 Ref      |
| KM677211 | Unassigned | Unassigned | Unassigned | 243_0   | Clustered           | 72 VC_243_0  | 72 | 0.8089 | 1          | 0.8089 | 0 | 0 | 0 | 1 Ref      |
| KM819694 | Unassigned | Unassigned | Unassigned | 114_0   | Clustered           | 8 VC_114_0   | 8  | 0.2518 | 1          | 0.2518 | 0 | 0 | 0 | 1 Ref      |
| KM819695 | Unassigned | Unassigned | Unassigned | 466_0   | Clustered           | 66 VC_466_0  | 66 | 0.9246 | 1          | 0.9246 | 0 | 0 | 0 | 1 Ref      |
| KM819696 | Unassigned | Unassigned | Unassigned | 466_0   | Clustered           | 66 VC_466_0  | 66 | 0.9246 | 1          | 0.9246 | 0 | 0 | 0 | 1 Ref      |
| KM873719 | Unassigned | Unassigned | Unassigned | 944_0   | Clustered           | 76 VC_944_0  | 76 | 0.9789 | 1          | 0.9789 | 0 | 0 | 0 | 1 Ref      |
| KM879463 | Unassigned | Unassigned | Unassigned | 1117_0  | Clustered           | 19 VC_1117_0 | 19 | 0.9177 | 1          | 0.9177 | 0 | 0 | 0 | 1 Ref      |
| KM881426 | Unassigned | Unassigned | Unassigned | 579_50  | Clustered           | 15 VC_579_50 | 15 | 0.0467 | 1          | 0.0467 | 0 | 0 | 0 | 0.9238 Ref |
| KM896878 | Unassigned | Unassigned | Unassigned | 859_0   | Clustered           | 67 VC_859_0  | 67 | 0.9622 | 1          | 0.9622 | 0 | 0 | 0 | 1 Ref      |
| KM923970 | Unassigned | Unassigned | Unassigned | 783_0   | Clustered           | 67 VC_783_0  | 67 | 0.8945 | 1          | 0.8945 | 0 | 0 | 0 | 1 Ref      |
| KM923971 | Unassigned | Unassigned | Unassigned | 245_0   | Clustered           | 17 VC_245_0  | 17 | 0.6081 | 1          | 0.6081 | 0 | 0 | 0 | 1 Ref      |
| KM925136 | Unassigned | Unassigned | Unassigned | 566_3   | Clustered           | 4 VC_566_3   | 4  | 0.0418 | 0.92781401 | 0.0388 | 0 | 0 | 0 | 1 Ref      |



|          |            |            |            |        |                     |              |     |        |            |        |   |   |   |            |
|----------|------------|------------|------------|--------|---------------------|--------------|-----|--------|------------|--------|---|---|---|------------|
| KM974184 | Unassigned | Unassigned | Unassigned | 862_0  | Clustered           | 29 VC_862_0  | 29  | 0.8594 | 1          | 0.8594 | 0 | 0 | 0 | 1 Ref      |
| KM979354 | Unassigned | Unassigned | Unassigned | 198_22 | Clustered           | 3 VC_198_22  | 3   | 0.0183 | 0.99859679 | 0.0183 | 0 | 0 | 0 | 1 Ref      |
| KM979355 | Unassigned | Unassigned | Unassigned | 198_22 | Clustered           | 3 VC_198_22  | 3   | 0.0183 | 0.99859679 | 0.0183 | 0 | 0 | 0 | 1 Ref      |
| KM983328 | Unassigned | Unassigned | Unassigned | 19_0   | Clustered           | 3 VC_19_0    | 3   | 0.3002 | 0.99840096 | 0.2997 | 0 | 0 | 0 | 1 Ref      |
| KM983329 | Unassigned | Unassigned | Unassigned | 146_0  | Clustered/Singleton | 1 VC_146_0   | 1   | 0      | 1          | 0      | 0 | 0 | 0 | 1 Ref      |
| KM983331 | Unassigned | Unassigned | Unassigned | 19_0   | Clustered           | 3 VC_19_0    | 3   | 0.3002 | 0.99840096 | 0.2997 | 0 | 0 | 0 | 1 Ref      |
| KM983334 | Unassigned | Unassigned | Unassigned | 19_0   | Clustered           | 3 VC_19_0    | 3   | 0.3002 | 0.99840096 | 0.2997 | 0 | 0 | 0 | 1 Ref      |
| KP007359 | Unassigned | Unassigned | Unassigned | 297_4  | Clustered           | 2 VC_297_4   | 2   | 0.0091 | 0.90221774 | 0.0082 | 0 | 0 | 0 | 1 Ref      |
| KP007360 | Unassigned | Unassigned | Unassigned | 297_1  | Clustered           | 8 VC_297_1   | 8   | 0.0749 | 1          | 0.0749 | 0 | 0 | 0 | 0.8571 Ref |
| KP007361 | Unassigned | Unassigned | Unassigned | 297_2  | Clustered           | 2 VC_297_2   | 2   | 0.0101 | 0.92290095 | 0.0093 | 0 | 0 | 0 | 1 Ref      |
| KP007362 | Unassigned | Unassigned | Unassigned | 297_3  | Clustered           | 2 VC_297_3   | 2   | 0.0101 | 0.92273843 | 0.0093 | 0 | 0 | 0 | 1 Ref      |
| KP010268 | Unassigned | Unassigned | Unassigned | 52_0   | Clustered           | 9 VC_52_0    | 9   | 0.5586 | 1          | 0.5586 | 0 | 0 | 0 | 1 Ref      |
| KP010413 | Unassigned | Unassigned | Unassigned | 340_11 | Clustered           | 15 VC_340_11 | 15  | 0.079  | 1          | 0.079  | 0 | 0 | 0 | 0.9333 Ref |
| KP017310 | Unassigned | Unassigned | Unassigned | 532_0  | Clustered           | 75 VC_532_0  | 75  | 0.9393 | 1          | 0.9393 | 0 | 0 | 0 | 1 Ref      |
| KP017311 | Unassigned | Unassigned | Unassigned | 532_0  | Clustered           | 75 VC_532_0  | 75  | 0.9393 | 1          | 0.9393 | 0 | 0 | 0 | 1 Ref      |
| KP025626 | Unassigned | Unassigned | Unassigned | 132_0  | Clustered           | 19 VC_132_0  | 19  | 0.6051 | 1          | 0.6051 | 0 | 0 | 0 | 1 Ref      |
| KP027195 | Unassigned | Unassigned | Unassigned | 786_0  | Clustered           | 4 VC_786_0   | 4   | 0.3519 | 0.99997469 | 0.3519 | 0 | 0 | 0 | 1 Ref      |
| KP027196 | Unassigned | Unassigned | Unassigned | 335_30 | Clustered           | 3 VC_335_30  | 3   | 0.0115 | 0.99857442 | 0.0115 | 0 | 0 | 0 | 1 Ref      |
| KP027197 | Unassigned | Unassigned | Unassigned | 384_18 | Clustered           | 10 VC_384_18 | 10  | 0.0301 | 1          | 0.0301 | 0 | 0 | 0 | 0.8 Ref    |
| KP027198 | Unassigned | Unassigned | Unassigned | 535_1  | Clustered           | 108 VC_535_1 | 108 | 0.8479 | 1          | 0.8479 | 0 | 0 | 0 | 0.9955 Ref |
| KP027199 | Unassigned | Unassigned | Unassigned | 244_1  | Clustered           | 13 VC_244_1  | 13  | 0.1766 | 1          | 0.1766 | 0 | 0 | 0 | 0.7308 Ref |
| KP027200 | Unassigned | Unassigned | Unassigned | 537_0  | Clustered           | 39 VC_537_0  | 39  | 0.8148 | 1          | 0.8148 | 0 | 0 | 0 | 1 Ref      |
| KP027201 | Unassigned | Unassigned | Unassigned | 536_1  | Clustered           | 2 VC_536_1   | 2   | 0.0373 | 0.95718761 | 0.0357 | 0 | 0 | 0 | 1 Ref      |
| KP027202 | Unassigned | Unassigned | Unassigned | 532_0  | Clustered           | 75 VC_532_0  | 75  | 0.9393 | 1          | 0.9393 | 0 | 0 | 0 | 1 Ref      |
| KP027203 | Unassigned | Unassigned | Unassigned | 335_30 | Clustered           | 3 VC_335_30  | 3   | 0.0115 | 0.99857442 | 0.0115 | 0 | 0 | 0 | 1 Ref      |
| KP027204 | Unassigned | Unassigned | Unassigned | 335_8  | Clustered           | 2 VC_335_8   | 2   | 0.0092 | 0.95751268 | 0.0088 | 0 | 0 | 0 | 1 Ref      |
| KP027205 | Unassigned | Unassigned | Unassigned | 335_35 | Clustered           | 2 VC_335_35  | 2   | 0.004  | 0.95574341 | 0.0038 | 0 | 0 | 0 | 1 Ref      |
| KP027207 | Unassigned | Unassigned | Unassigned | 527_0  | Clustered           | 37 VC_527_0  | 37  | 0.9679 | 1          | 0.9679 | 0 | 0 | 0 | 1 Ref      |
| KP027208 | Unassigned | Unassigned | Unassigned | 384_15 | Clustered           | 44 VC_384_15 | 44  | 0.139  | 1          | 0.139  | 0 | 0 | 0 | 0.7474 Ref |
| KP027209 | Unassigned | Unassigned | Unassigned | 384_18 | Clustered           | 10 VC_384_18 | 10  | 0.0301 | 1          | 0.0301 | 0 | 0 | 0 | 0.8 Ref    |
| KP027446 | Unassigned | Unassigned | Unassigned | 155_20 | Clustered/Singleton | 1 VC_155_20  | 1   | 0      | 1          | 0      | 0 | 0 | 0 | 1 Ref      |
| KP027447 | Unassigned | Unassigned | Unassigned | 156_0  | Clustered           | 13 VC_156_0  | 13  | 0.2378 | 1          | 0.2378 | 0 | 0 | 0 | 0.9872 Ref |
| KP037007 | Unassigned | Unassigned | Unassigned | 134_0  | Clustered           | 2 VC_134_0   | 2   | 0.0123 | 0.95745739 | 0.0118 | 0 | 0 | 0 | 1 Ref      |
| KP057620 | Unassigned | Unassigned | Unassigned | 535_1  | Clustered           | 108 VC_535_1 | 108 | 0.8479 | 1          | 0.8479 | 0 | 0 | 0 | 0.9955 Ref |
| KP063118 | Unassigned | Unassigned | Unassigned | 610_0  | Clustered           | 14 VC_610_0  | 14  | 0.5159 | 1          | 0.5159 | 0 | 0 | 0 | 1 Ref      |
| KP063541 | Unassigned | Unassigned | Unassigned | 236_0  | Clustered           | 32 VC_236_0  | 32  | 0.9115 | 1          | 0.9115 | 0 | 0 | 0 | 1 Ref      |
| KP063902 | Unassigned | Unassigned | Unassigned | 849_0  | Clustered           | 2 VC_849_0   | 2   | 0.4243 | 0.94750084 | 0.402  | 0 | 0 | 0 | 1 Ref      |
| KP063903 | Unassigned | Unassigned | Unassigned | 849_0  | Clustered           | 2 VC_849_0   | 2   | 0.4243 | 0.94750084 | 0.402  | 0 | 0 | 0 | 1 Ref      |
| KP064094 | Unassigned | Unassigned | Unassigned | 819_0  | Clustered           | 19 VC_819_0  | 19  | 0.6835 | 1          | 0.6835 | 0 | 0 | 0 | 1 Ref      |
| KP085586 | Unassigned | Unassigned | Unassigned | 595_0  | Clustered           | 35 VC_595_0  | 35  | 0.8809 | 1          | 0.8809 | 0 | 0 | 0 | 1 Ref      |
| KP087938 | Unassigned | Unassigned | Unassigned | 1119_0 | Clustered           | 48 VC_1119_0 | 48  | 0.852  | 1          | 0.852  | 0 | 0 | 0 | 1 Ref      |
| KP087939 | Unassigned | Unassigned | Unassigned | 411_0  | Clustered           | 48 VC_411_0  | 48  | 0.4808 | 1          | 0.4808 | 0 | 0 | 0 | 1 Ref      |
| KP087942 | Unassigned | Unassigned | Unassigned | 1119_0 | Clustered           | 48 VC_1119_0 | 48  | 0.852  | 1          | 0.852  | 0 | 0 | 0 | 1 Ref      |
| KP087943 | Unassigned | Unassigned | Unassigned | 1128_0 | Clustered           | 3 VC_1128_0  | 3   | 0.8404 | 0.81445332 | 0.6845 | 0 | 0 | 0 | 1 Ref      |
| KP087945 | Unassigned | Unassigned | Unassigned | 411_0  | Clustered           | 48 VC_411_0  | 48  | 0.4808 | 1          | 0.4808 | 0 | 0 | 0 | 1 Ref      |
| KP087948 | Unassigned | Unassigned | Unassigned | 1104_0 | Clustered           | 44 VC_1104_0 | 44  | 0.9574 | 0.72818579 | 0.6972 | 0 | 0 | 0 | 1 Ref      |
| KP087951 | Unassigned | Unassigned | Unassigned | 1128_0 | Clustered           | 3 VC_1128_0  | 3   | 0.8404 | 0.81445332 | 0.6845 | 0 | 0 | 0 | 1 Ref      |
| KP087953 | Unassigned | Unassigned | Unassigned | 1129_0 | Clustered           | 5 VC_1129_0  | 5   | 0.8077 | 0.98759579 | 0.7976 | 0 | 0 | 0 | 1 Ref      |
| KP087954 | Unassigned | Unassigned | Unassigned | 1025_0 | Clustered           | 8 VC_1025_0  | 8   | 0.386  | 1          | 0.386  | 0 | 0 | 0 | 1 Ref      |
| KP087955 | Unassigned | Unassigned | Unassigned | 1130_0 | Clustered           | 3 VC_1130_0  | 3   | 0.7736 | 0.82711071 | 0.6399 | 0 | 0 | 0 | 1 Ref      |
| KP087957 | Unassigned | Unassigned | Unassigned | 1128_0 | Clustered           | 3 VC_1128_0  | 3   | 0.8404 | 0.81445332 | 0.6845 | 0 | 0 | 0 | 1 Ref      |
| KP090453 | Unassigned | Unassigned | Unassigned | 399_0  | Clustered           | 49 VC_399_0  | 49  | 0.7927 | 1          | 0.7927 | 0 | 0 | 0 | 1 Ref      |
| KP090454 | Unassigned | Unassigned | Unassigned | 399_0  | Clustered           | 49 VC_399_0  | 49  | 0.7927 | 1          | 0.7927 | 0 | 0 | 0 | 1 Ref      |
| KP137432 | Unassigned | Unassigned | Unassigned | 4_0    | Clustered           | 7 VC_4_0     | 7   | 0.7823 | 1          | 0.7823 | 0 | 0 | 0 | 1 Ref      |
| KP137433 | Unassigned | Unassigned | Unassigned | 734_0  | Clustered           | 4 VC_734_0   | 4   | 0.636  | 0.99996676 | 0.6359 | 0 | 0 | 0 | 0.8333 Ref |
| KP137434 | Unassigned | Unassigned | Unassigned | 4_0    | Clustered           | 7 VC_4_0     | 7   | 0.7823 | 1          | 0.7823 | 0 | 0 | 0 | 1 Ref      |
| KP137435 | Unassigned | Unassigned | Unassigned | 734_0  | Clustered           | 4 VC_734_0   | 4   | 0.636  | 0.99996676 | 0.6359 | 0 | 0 | 0 | 0.8333 Ref |
| KP137436 | Unassigned | Unassigned | Unassigned | 4_0    | Clustered           | 7 VC_4_0     | 7   | 0.7823 | 1          | 0.7823 | 0 | 0 | 0 | 1 Ref      |
| KP137437 | Unassigned | Unassigned | Unassigned | 734_0  | Clustered           | 4 VC_734_0   | 4   | 0.636  | 0.99996676 | 0.6359 | 0 | 0 | 0 | 0.8333 Ref |
| KP137438 | Unassigned | Unassigned | Unassigned | 4_0    | Clustered           | 7 VC_4_0     | 7   | 0.7823 | 1          | 0.7823 | 0 | 0 | 0 | 1 Ref      |
| KP137439 | Unassigned | Unassigned | Unassigned | 734_0  | Clustered           | 4 VC_734_0   | 4   | 0.636  | 0.99996676 | 0.6359 | 0 | 0 | 0 | 0.8333 Ref |
| KP143762 | Unassigned | Unassigned | Unassigned | 340_1  | Clustered           | 17 VC_340_1  | 17  | 0.0863 | 1          | 0.0863 | 0 | 0 | 0 | 0.8235 Ref |
| KP143763 | Unassigned | Unassigned | Unassigned | 198_0  | Clustered           | 2 VC_198_0   | 2   | 0.0086 | 0.95763473 | 0.0082 | 0 | 0 | 0 | 1 Ref      |
| KP202158 | Unassigned | Unassigned | Unassigned | 508_4  | Clustered/Singleton | 1 VC_508_4   | 1   | 0      | 1          | 0      | 0 | 0 | 0 | 1 Ref      |
| KP202969 | Unassigned | Unassigned | Unassigned | 177_0  | Clustered           | 8 VC_177_0   | 8   | 0.5848 | 1          | 0.5848 | 0 | 0 | 0 | 1 Ref      |
| KP202970 | Unassigned | Unassigned | Unassigned | 177_0  | Clustered           | 8 VC_177_0   | 8   | 0.5848 | 1          | 0.5848 | 0 | 0 | 0 | 1 Ref      |
| KP202971 | Unassigned | Unassigned | Unassigned | 1132_0 | Clustered           | 4 VC_1132_0  | 4   | 1      | 1          | 1      | 0 | 0 | 0 | 1 Ref      |
| KP202972 | Unassigned | Unassigned | Unassigned | 725_0  | Clustered           | 47 VC_725_0  | 47  | 0.8649 | 1          | 0.8649 | 0 | 0 | 0 | 1 Ref      |
| KP208803 | Unassigned | Unassigned | Unassigned | 268_2  | Clustered/Singleton | 1 VC_268_2   | 1   | 0      | 1          | 0      | 0 | 0 | 0 | 1 Ref      |
| KP209285 | Unassigned | Unassigned | Unassigned | 12_0   | Clustered           | 21 VC_12_0   | 21  | 0.2262 | 1          | 0.2262 | 0 | 0 | 0 | 0.9571 Ref |
| KP233880 | Unassigned | Unassigned | Unassigned | 486_0  | Clustered           | 47 VC_486_0  | 47  | 0.9022 | 1          | 0.9022 | 0 | 0 | 0 | 1 Ref      |
| KP238129 | Unassigned | Unassigned | Unassigned | 460_0  | Clustered           | 4 VC_460_0   | 4   | 0.7519 | 0.99987768 | 0.7518 | 0 | 0 | 0 | 1 Ref      |
| KP273225 | Unassigned | Unassigned | Unassigned | 226_0  | Clustered           | 5 VC_226_0   | 5   | 0.0793 | 0.99999998 | 0.0793 | 0 | 0 | 0 | 1 Ref      |
| KP280062 | Unassigned | Unassigned | Unassigned | 806_0  | Clustered           | 6 VC_806_0   | 6   | 0.5468 | 1          | 0.5468 | 0 | 0 | 0 | 1 Ref      |
| KP280063 | Unassigned | Unassigned | Unassigned | 1007_0 | Clustered           | 3 VC_1007_0  | 3   | 0.0541 | 0.99838914 | 0.0541 | 0 | 0 | 0 | 1 Ref      |
| KP282673 | Unassigned | Unassigned | Unassigned | 815_0  | Clustered           | 3 VC_815_0   | 3   | 1      | 1          | 1      | 0 | 0 | 0 | 1 Ref      |
| KP282674 | Unassigned | Unassigned | Unassigned | 815_0  | Clustered           | 3 VC_815_0   | 3   | 1      | 1          | 1      | 0 | 0 | 0 | 1 Ref      |
| KP282675 | Unassigned | Unassigned | Unassigned | 360_0  | Clustered           | 22 VC_360_0  | 22  | 0.96   | 1          | 0.96   | 0 | 0 | 0 | 1 Ref      |
| KP282677 | Unassigned | Unassigned | Unassigned | 460_0  | Clustered           | 4 VC_460_0   | 4   | 0.7519 | 0.99987768 | 0.7518 | 0 | 0 | 0 | 1 Ref      |
| KP282678 | Unassigned | Unassigned | Unassigned | 460_0  | Clustered           | 4 VC_460_0   | 4   | 0.7519 | 0.99987768 | 0.7518 | 0 | 0 | 0 | 1 Ref      |
| KP282679 | Unassigned | Unassigned | Unassigned | 910_0  | Clustered           | 2 VC_910_0   | 2   | 0.6744 | 0.91813282 | 0.6192 | 0 | 0 | 0 | 1 Ref      |



|          |            |            |            |        |           |              |     |        |            |        |   |   |   |            |
|----------|------------|------------|------------|--------|-----------|--------------|-----|--------|------------|--------|---|---|---|------------|
| KP282680 | Unassigned | Unassigned | Unassigned | 910_0  | Clustered | 2 VC_910_0   | 2   | 0.6744 | 0.91813282 | 0.6192 | 0 | 0 | 0 | 1 Ref      |
| KP296791 | Unassigned | Unassigned | Unassigned | 725_0  | Clustered | 47 VC_725_0  | 47  | 0.8649 | 1          | 0.8649 | 0 | 0 | 0 | 1 Ref      |
| KP296793 | Unassigned | Unassigned | Unassigned | 725_0  | Clustered | 47 VC_725_0  | 47  | 0.8649 | 1          | 0.8649 | 0 | 0 | 0 | 1 Ref      |
| KP296794 | Unassigned | Unassigned | Unassigned | 725_0  | Clustered | 47 VC_725_0  | 47  | 0.8649 | 1          | 0.8649 | 0 | 0 | 0 | 1 Ref      |
| KP296795 | Unassigned | Unassigned | Unassigned | 725_0  | Clustered | 47 VC_725_0  | 47  | 0.8649 | 1          | 0.8649 | 0 | 0 | 0 | 1 Ref      |
| KP296796 | Unassigned | Unassigned | Unassigned | 725_0  | Clustered | 47 VC_725_0  | 47  | 0.8649 | 1          | 0.8649 | 0 | 0 | 0 | 1 Ref      |
| KP308307 | Unassigned | Unassigned | Unassigned | 837_1  | Clustered | 24 VC_837_1  | 24  | 0.5328 | 1          | 0.5328 | 0 | 0 | 0 | 1 Ref      |
| KP313531 | Unassigned | Unassigned | Unassigned | 398_0  | Clustered | 51 VC_398_0  | 51  | 0.8741 | 1          | 0.8741 | 0 | 0 | 0 | 1 Ref      |
| KP313532 | Unassigned | Unassigned | Unassigned | 768_0  | Clustered | 4 VC_768_0   | 4   | 0.1754 | 0.99998526 | 0.1754 | 0 | 0 | 0 | 1 Ref      |
| KP339049 | Unassigned | Unassigned | Unassigned | 94_0   | Clustered | 22 VC_94_0   | 22  | 0.5602 | 1          | 0.5602 | 0 | 0 | 0 | 1 Ref      |
| KP340287 | Unassigned | Unassigned | Unassigned | 80_0   | Clustered | 64 VC_80_0   | 64  | 0.418  | 1          | 0.418  | 0 | 0 | 0 | 0.7649 Ref |
| KP340288 | Unassigned | Unassigned | Unassigned | 80_0   | Clustered | 64 VC_80_0   | 64  | 0.418  | 1          | 0.418  | 0 | 0 | 0 | 0.7649 Ref |
| KP343639 | Unassigned | Unassigned | Unassigned | 84_0   | Clustered | 6 VC_84_0    | 6   | 0.6364 | 1          | 0.6364 | 0 | 0 | 0 | 1 Ref      |
| KP399677 | Unassigned | Unassigned | Unassigned | 394_0  | Clustered | 3 VC_394_0   | 3   | 0.1582 | 0.99545803 | 0.1575 | 0 | 0 | 0 | 1 Ref      |
| KP399678 | Unassigned | Unassigned | Unassigned | 392_0  | Clustered | 9 VC_392_0   | 9   | 0.7527 | 1          | 0.7527 | 0 | 0 | 0 | 1 Ref      |
| KP411017 | Unassigned | Unassigned | Unassigned | 1071_0 | Clustered | 7 VC_1071_0  | 7   | 0.9883 | 0.99999504 | 0.9883 | 0 | 0 | 0 | 1 Ref      |
| KP658157 | Unassigned | Unassigned | Unassigned | 972_0  | Clustered | 99 VC_972_0  | 99  | 0.9113 | 1          | 0.9113 | 0 | 0 | 0 | 0.9928 Ref |
| KP671755 | Unassigned | Unassigned | Unassigned | 549_0  | Clustered | 9 VC_549_0   | 9   | 0.2597 | 1          | 0.2597 | 0 | 0 | 0 | 1 Ref      |
| KP682371 | Unassigned | Unassigned | Unassigned | 44_0   | Clustered | 49 VC_44_0   | 49  | 0.4506 | 1          | 0.4506 | 0 | 0 | 0 | 0.8605 Ref |
| KP682372 | Unassigned | Unassigned | Unassigned | 35_0   | Clustered | 35 VC_35_0   | 35  | 0.431  | 1          | 0.431  | 0 | 0 | 0 | 1 Ref      |
| KP682373 | Unassigned | Unassigned | Unassigned | 35_0   | Clustered | 35 VC_35_0   | 35  | 0.431  | 1          | 0.431  | 0 | 0 | 0 | 1 Ref      |
| KP682374 | Unassigned | Unassigned | Unassigned | 44_0   | Clustered | 49 VC_44_0   | 49  | 0.4506 | 1          | 0.4506 | 0 | 0 | 0 | 0.8605 Ref |
| KP682375 | Unassigned | Unassigned | Unassigned | 35_0   | Clustered | 35 VC_35_0   | 35  | 0.431  | 1          | 0.431  | 0 | 0 | 0 | 1 Ref      |
| KP682376 | Unassigned | Unassigned | Unassigned | 35_0   | Clustered | 35 VC_35_0   | 35  | 0.431  | 1          | 0.431  | 0 | 0 | 0 | 1 Ref      |
| KP682377 | Unassigned | Unassigned | Unassigned | 35_0   | Clustered | 35 VC_35_0   | 35  | 0.431  | 1          | 0.431  | 0 | 0 | 0 | 1 Ref      |
| KP682378 | Unassigned | Unassigned | Unassigned | 35_0   | Clustered | 35 VC_35_0   | 35  | 0.431  | 1          | 0.431  | 0 | 0 | 0 | 1 Ref      |
| KP682379 | Unassigned | Unassigned | Unassigned | 35_0   | Clustered | 35 VC_35_0   | 35  | 0.431  | 1          | 0.431  | 0 | 0 | 0 | 1 Ref      |
| KP682380 | Unassigned | Unassigned | Unassigned | 35_0   | Clustered | 35 VC_35_0   | 35  | 0.431  | 1          | 0.431  | 0 | 0 | 0 | 1 Ref      |
| KP682382 | Unassigned | Unassigned | Unassigned | 35_0   | Clustered | 35 VC_35_0   | 35  | 0.431  | 1          | 0.431  | 0 | 0 | 0 | 1 Ref      |
| KP682383 | Unassigned | Unassigned | Unassigned | 35_0   | Clustered | 35 VC_35_0   | 35  | 0.431  | 1          | 0.431  | 0 | 0 | 0 | 1 Ref      |
| KP682384 | Unassigned | Unassigned | Unassigned | 35_0   | Clustered | 35 VC_35_0   | 35  | 0.431  | 1          | 0.431  | 0 | 0 | 0 | 1 Ref      |
| KP682385 | Unassigned | Unassigned | Unassigned | 35_0   | Clustered | 35 VC_35_0   | 35  | 0.431  | 1          | 0.431  | 0 | 0 | 0 | 1 Ref      |
| KP682386 | Unassigned | Unassigned | Unassigned | 35_0   | Clustered | 35 VC_35_0   | 35  | 0.431  | 1          | 0.431  | 0 | 0 | 0 | 1 Ref      |
| KP682387 | Unassigned | Unassigned | Unassigned | 35_0   | Clustered | 35 VC_35_0   | 35  | 0.431  | 1          | 0.431  | 0 | 0 | 0 | 1 Ref      |
| KP682388 | Unassigned | Unassigned | Unassigned | 35_0   | Clustered | 35 VC_35_0   | 35  | 0.431  | 1          | 0.431  | 0 | 0 | 0 | 1 Ref      |
| KP682389 | Unassigned | Unassigned | Unassigned | 35_0   | Clustered | 35 VC_35_0   | 35  | 0.431  | 1          | 0.431  | 0 | 0 | 0 | 1 Ref      |
| KP682390 | Unassigned | Unassigned | Unassigned | 35_0   | Clustered | 35 VC_35_0   | 35  | 0.431  | 1          | 0.431  | 0 | 0 | 0 | 1 Ref      |
| KP682391 | Unassigned | Unassigned | Unassigned | 35_0   | Clustered | 35 VC_35_0   | 35  | 0.431  | 1          | 0.431  | 0 | 0 | 0 | 1 Ref      |
| KP682392 | Unassigned | Unassigned | Unassigned | 35_0   | Clustered | 35 VC_35_0   | 35  | 0.431  | 1          | 0.431  | 0 | 0 | 0 | 1 Ref      |
| KP687431 | Unassigned | Unassigned | Unassigned | 155_8  | Clustered | 66 VC_155_8  | 66  | 0.4537 | 1          | 0.4537 | 0 | 0 | 0 | 0.8182 Ref |
| KP687432 | Unassigned | Unassigned | Unassigned | 155_8  | Clustered | 66 VC_155_8  | 66  | 0.4537 | 1          | 0.4537 | 0 | 0 | 0 | 0.8182 Ref |
| KP708985 | Unassigned | Unassigned | Unassigned | 113_0  | Clustered | 91 VC_113_0  | 91  | 0.9584 | 1          | 0.9584 | 0 | 0 | 0 | 1 Ref      |
| KP708986 | Unassigned | Unassigned | Unassigned | 113_0  | Clustered | 91 VC_113_0  | 91  | 0.9584 | 1          | 0.9584 | 0 | 0 | 0 | 1 Ref      |
| KP719132 | Unassigned | Unassigned | Unassigned | 737_0  | Clustered | 13 VC_737_0  | 13  | 0.5083 | 1          | 0.5083 | 0 | 0 | 0 | 1 Ref      |
| KP719133 | Unassigned | Unassigned | Unassigned | 737_0  | Clustered | 13 VC_737_0  | 13  | 0.5083 | 1          | 0.5083 | 0 | 0 | 0 | 1 Ref      |
| KP719134 | Unassigned | Unassigned | Unassigned | 737_0  | Clustered | 13 VC_737_0  | 13  | 0.5083 | 1          | 0.5083 | 0 | 0 | 0 | 1 Ref      |
| KP790008 | Unassigned | Unassigned | Unassigned | 894_0  | Clustered | 6 VC_894_0   | 6   | 0.3171 | 1          | 0.3171 | 0 | 0 | 0 | 1 Ref      |
| KP790009 | Unassigned | Unassigned | Unassigned | 894_0  | Clustered | 6 VC_894_0   | 6   | 0.3171 | 1          | 0.3171 | 0 | 0 | 0 | 1 Ref      |
| KP790010 | Unassigned | Unassigned | Unassigned | 894_0  | Clustered | 6 VC_894_0   | 6   | 0.3171 | 1          | 0.3171 | 0 | 0 | 0 | 1 Ref      |
| KP790011 | Unassigned | Unassigned | Unassigned | 419_0  | Clustered | 11 VC_419_0  | 11  | 0.9465 | 1          | 0.9465 | 0 | 0 | 0 | 1 Ref      |
| KP791805 | Unassigned | Unassigned | Unassigned | 398_0  | Clustered | 51 VC_398_0  | 51  | 0.8741 | 1          | 0.8741 | 0 | 0 | 0 | 1 Ref      |
| KP791806 | Unassigned | Unassigned | Unassigned | 398_0  | Clustered | 51 VC_398_0  | 51  | 0.8741 | 1          | 0.8741 | 0 | 0 | 0 | 1 Ref      |
| KP791807 | Unassigned | Unassigned | Unassigned | 398_0  | Clustered | 51 VC_398_0  | 51  | 0.8741 | 1          | 0.8741 | 0 | 0 | 0 | 1 Ref      |
| KP792623 | Unassigned | Unassigned | Unassigned | 830_0  | Clustered | 3 VC_830_0   | 3   | 0.5256 | 0.99825218 | 0.5246 | 0 | 0 | 0 | 1 Ref      |
| KP793104 | Unassigned | Unassigned | Unassigned | 210_0  | Clustered | 105 VC_210_0 | 105 | 0.4076 | 1          | 0.4076 | 0 | 0 | 0 | 0.7766 Ref |
| KP793105 | Unassigned | Unassigned | Unassigned | 210_0  | Clustered | 105 VC_210_0 | 105 | 0.4076 | 1          | 0.4076 | 0 | 0 | 0 | 0.7766 Ref |
| KP793108 | Unassigned | Unassigned | Unassigned | 210_0  | Clustered | 105 VC_210_0 | 105 | 0.4076 | 1          | 0.4076 | 0 | 0 | 0 | 0.7766 Ref |
| KP793109 | Unassigned | Unassigned | Unassigned | 210_0  | Clustered | 105 VC_210_0 | 105 | 0.4076 | 1          | 0.4076 | 0 | 0 | 0 | 0.7766 Ref |
| KP793111 | Unassigned | Unassigned | Unassigned | 210_0  | Clustered | 105 VC_210_0 | 105 | 0.4076 | 1          | 0.4076 | 0 | 0 | 0 | 0.7766 Ref |
| KP793113 | Unassigned | Unassigned | Unassigned | 210_0  | Clustered | 105 VC_210_0 | 105 | 0.4076 | 1          | 0.4076 | 0 | 0 | 0 | 0.7766 Ref |
| KP793115 | Unassigned | Unassigned | Unassigned | 210_0  | Clustered | 105 VC_210_0 | 105 | 0.4076 | 1          | 0.4076 | 0 | 0 | 0 | 0.7766 Ref |
| KP793116 | Unassigned | Unassigned | Unassigned | 210_0  | Clustered | 105 VC_210_0 | 105 | 0.4076 | 1          | 0.4076 | 0 | 0 | 0 | 0.7766 Ref |
| KP793117 | Unassigned | Unassigned | Unassigned | 210_0  | Clustered | 105 VC_210_0 | 105 | 0.4076 | 1          | 0.4076 | 0 | 0 | 0 | 0.7766 Ref |
| KP793118 | Unassigned | Unassigned | Unassigned | 210_0  | Clustered | 105 VC_210_0 | 105 | 0.4076 | 1          | 0.4076 | 0 | 0 | 0 | 0.7766 Ref |
| KP793123 | Unassigned | Unassigned | Unassigned | 210_0  | Clustered | 105 VC_210_0 | 105 | 0.4076 | 1          | 0.4076 | 0 | 0 | 0 | 0.7766 Ref |
| KP793124 | Unassigned | Unassigned | Unassigned | 210_0  | Clustered | 105 VC_210_0 | 105 | 0.4076 | 1          | 0.4076 | 0 | 0 | 0 | 0.7766 Ref |
| KP793129 | Unassigned | Unassigned | Unassigned | 210_0  | Clustered | 105 VC_210_0 | 105 | 0.4076 | 1          | 0.4076 | 0 | 0 | 0 | 0.7766 Ref |
| KP793134 | Unassigned | Unassigned | Unassigned | 210_0  | Clustered | 105 VC_210_0 | 105 | 0.4076 | 1          | 0.4076 | 0 | 0 | 0 | 0.7766 Ref |
| KP797973 | Unassigned | Unassigned | Unassigned | 135_9  | Clustered | 3 VC_135_9   | 3   | 0.0098 | 0.98303301 | 0.0097 | 0 | 0 | 0 | 1 Ref      |
| KP836355 | Unassigned | Unassigned | Unassigned | 1134_0 | Clustered | 2 VC_1134_0  | 2   | 1      | 1          | 1      | 0 | 0 | 0 | 1 Ref      |
| KP836356 | Unassigned | Unassigned | Unassigned | 1134_0 | Clustered | 2 VC_1134_0  | 2   | 1      | 1          | 1      | 0 | 0 | 0 | 1 Ref      |
| KP861229 | Unassigned | Unassigned | Unassigned | 713_0  | Clustered | 26 VC_713_0  | 26  | 0.9358 | 1          | 0.9358 | 0 | 0 | 0 | 1 Ref      |
| KP861230 | Unassigned | Unassigned | Unassigned | 441_1  | Clustered | 8 VC_441_1   | 8   | 0.5443 | 1          | 0.5443 | 0 | 0 | 0 | 0.9643 Ref |
| KP861231 | Unassigned | Unassigned | Unassigned | 713_0  | Clustered | 26 VC_713_0  | 26  | 0.9358 | 1          | 0.9358 | 0 | 0 | 0 | 1 Ref      |
| KP869100 | Unassigned | Unassigned | Unassigned | 340_7  | Clustered | 18 VC_340_7  | 18  | 0.0936 | 1          | 0.0936 | 0 | 0 | 0 | 0.7778 Ref |
| KP869101 | Unassigned | Unassigned | Unassigned | 293_17 | Clustered | 8 VC_293_17  | 8   | 0.0534 | 0.99997879 | 0.0534 | 0 | 0 | 0 | 0.6071 Ref |
| KP869102 | Unassigned | Unassigned | Unassigned | 794_15 | Clustered | 5 VC_794_15  | 5   | 0.0243 | 0.76144861 | 0.0185 | 0 | 0 | 0 | 0.9 Ref    |
| KP869103 | Unassigned | Unassigned | Unassigned | 794_15 | Clustered | 5 VC_794_15  | 5   | 0.0243 | 0.76144861 | 0.0185 | 0 | 0 | 0 | 0.9 Ref    |
| KP869104 | Unassigned | Unassigned | Unassigned | 293_17 | Clustered | 8 VC_293_17  | 8   | 0.0534 | 0.99997879 | 0.0534 | 0 | 0 | 0 | 0.6071 Ref |
| KP869105 | Unassigned | Unassigned | Unassigned | 290_2  | Clustered | 2 VC_290_2   | 2   | 0.0027 | 0.93842619 | 0.0025 | 0 | 0 | 0 | 1 Ref      |
| KP869106 | Unassigned | Unassigned | Unassigned | 340_7  | Clustered | 18 VC_340_7  | 18  | 0.0936 | 1          | 0.0936 | 0 | 0 | 0 | 0.7778 Ref |



|          |            |            |            |        |                     |              |    |        |            |        |   |   |   |            |
|----------|------------|------------|------------|--------|---------------------|--------------|----|--------|------------|--------|---|---|---|------------|
| KP869107 | Unassigned | Unassigned | Unassigned | 492_0  | Clustered           | 20 VC_492_0  | 20 | 0.7887 | 1          | 0.7887 | 0 | 0 | 0 | 1 Ref      |
| KP869108 | Unassigned | Unassigned | Unassigned | 492_0  | Clustered           | 20 VC_492_0  | 20 | 0.7887 | 1          | 0.7887 | 0 | 0 | 0 | 1 Ref      |
| KP869109 | Unassigned | Unassigned | Unassigned | 340_7  | Clustered           | 18 VC_340_7  | 18 | 0.0936 | 1          | 0.0936 | 0 | 0 | 0 | 0.7778 Ref |
| KP869110 | Unassigned | Unassigned | Unassigned | 340_7  | Clustered           | 18 VC_340_7  | 18 | 0.0936 | 1          | 0.0936 | 0 | 0 | 0 | 0.7778 Ref |
| KP869111 | Unassigned | Unassigned | Unassigned | 293_17 | Clustered           | 8 VC_293_17  | 8  | 0.0534 | 0.99997879 | 0.0534 | 0 | 0 | 0 | 0.6071 Ref |
| KP869112 | Unassigned | Unassigned | Unassigned | 794_15 | Clustered           | 5 VC_794_15  | 5  | 0.0243 | 0.76144861 | 0.0185 | 0 | 0 | 0 | 0.9 Ref    |
| KP869113 | Unassigned | Unassigned | Unassigned | 340_7  | Clustered           | 18 VC_340_7  | 18 | 0.0936 | 1          | 0.0936 | 0 | 0 | 0 | 0.7778 Ref |
| KP876465 | Unassigned | Unassigned | Unassigned | 891_0  | Clustered           | 11 VC_891_0  | 11 | 0.9663 | 1          | 0.9663 | 0 | 0 | 0 | 1 Ref      |
| KP876466 | Unassigned | Unassigned | Unassigned | 891_0  | Clustered           | 11 VC_891_0  | 11 | 0.9663 | 1          | 0.9663 | 0 | 0 | 0 | 1 Ref      |
| KP881232 | Unassigned | Unassigned | Unassigned | 1093_1 | Clustered/Singleton | 1 VC_1093_1  | 1  | 0      | 1          | 0      | 0 | 0 | 0 | 1 Ref      |
| KP881332 | Unassigned | Unassigned | Unassigned | 159_0  | Clustered           | 25 VC_159_0  | 25 | 0.7699 | 1          | 0.7699 | 0 | 0 | 0 | 1 Ref      |
| KP890822 | Unassigned | Unassigned | Unassigned | 466_0  | Clustered           | 66 VC_466_0  | 66 | 0.9246 | 1          | 0.9246 | 0 | 0 | 0 | 1 Ref      |
| KP890823 | Unassigned | Unassigned | Unassigned | 295_3  | Clustered           | 3 VC_295_3   | 3  | 0.0443 | 0.99844642 | 0.0442 | 0 | 0 | 0 | 1 Ref      |
| KP893289 | Unassigned | Unassigned | Unassigned | 12_0   | Clustered           | 21 VC_12_0   | 21 | 0.2262 | 1          | 0.2262 | 0 | 0 | 0 | 0.9571 Ref |
| KP893290 | Unassigned | Unassigned | Unassigned | 12_2   | Clustered           | 19 VC_12_2   | 19 | 0.2009 | 1          | 0.2009 | 0 | 0 | 0 | 1 Ref      |
| KP966108 | Unassigned | Unassigned | Unassigned | 1_0    | Clustered           | 54 VC_1_0    | 54 | 0.8518 | 1          | 0.8518 | 0 | 0 | 0 | 1 Ref      |
| KP972568 | Unassigned | Unassigned | Unassigned | 904_0  | Clustered           | 10 VC_904_0  | 10 | 0.9878 | 0.99948433 | 0.9873 | 0 | 0 | 0 | 1 Ref      |
| KP972569 | Unassigned | Unassigned | Unassigned | 904_0  | Clustered           | 10 VC_904_0  | 10 | 0.9878 | 0.99948433 | 0.9873 | 0 | 0 | 0 | 1 Ref      |
| KP994390 | Unassigned | Unassigned | Unassigned | 862_0  | Clustered           | 29 VC_862_0  | 29 | 0.8594 | 1          | 0.8594 | 0 | 0 | 0 | 1 Ref      |
| KP994596 | Unassigned | Unassigned | Unassigned | 663_0  | Clustered           | 5 VC_663_0   | 5  | 0.6645 | 0.99999974 | 0.6645 | 0 | 0 | 0 | 1 Ref      |
| KR011062 | Unassigned | Unassigned | Unassigned | 893_2  | Clustered           | 3 VC_893_2   | 3  | 0.0458 | 0.99850411 | 0.0457 | 0 | 0 | 0 | 1 Ref      |
| KR011063 | Unassigned | Unassigned | Unassigned | 893_2  | Clustered           | 3 VC_893_2   | 3  | 0.0458 | 0.99850411 | 0.0457 | 0 | 0 | 0 | 1 Ref      |
| KR011064 | Unassigned | Unassigned | Unassigned | 893_2  | Clustered           | 3 VC_893_2   | 3  | 0.0458 | 0.99850411 | 0.0457 | 0 | 0 | 0 | 1 Ref      |
| KR014248 | Unassigned | Unassigned | Unassigned | 340_4  | Clustered           | 2 VC_340_4   | 2  | 0.0052 | 0.95746455 | 0.005  | 0 | 0 | 0 | 1 Ref      |
| KR029086 | Unassigned | Unassigned | Unassigned | 384_13 | Clustered           | 33 VC_384_13 | 33 | 0.1785 | 1          | 0.1785 | 0 | 0 | 0 | 0.8769 Ref |
| KR029087 | Unassigned | Unassigned | Unassigned | 384_13 | Clustered           | 33 VC_384_13 | 33 | 0.1785 | 1          | 0.1785 | 0 | 0 | 0 | 0.8769 Ref |
| KR049063 | Unassigned | Unassigned | Unassigned | 93_0   | Clustered           | 22 VC_93_0   | 22 | 0.5285 | 1          | 0.5285 | 0 | 0 | 0 | 1 Ref      |
| KR052142 | Unassigned | Unassigned | Unassigned | 862_0  | Clustered           | 29 VC_862_0  | 29 | 0.8594 | 1          | 0.8594 | 0 | 0 | 0 | 1 Ref      |
| KR052143 | Unassigned | Unassigned | Unassigned | 77_0   | Clustered           | 37 VC_77_0   | 37 | 0.9392 | 1          | 0.9392 | 0 | 0 | 0 | 1 Ref      |
| KR052480 | Unassigned | Unassigned | Unassigned | 451_0  | Clustered           | 4 VC_451_0   | 4  | 0.5528 | 0.99998171 | 0.5528 | 0 | 0 | 0 | 1 Ref      |
| KR052481 | Unassigned | Unassigned | Unassigned | 451_0  | Clustered           | 4 VC_451_0   | 4  | 0.5528 | 0.99998171 | 0.5528 | 0 | 0 | 0 | 1 Ref      |
| KR052482 | Unassigned | Unassigned | Unassigned | 451_0  | Clustered           | 4 VC_451_0   | 4  | 0.5528 | 0.99998171 | 0.5528 | 0 | 0 | 0 | 1 Ref      |
| KR053195 | Unassigned | Unassigned | Unassigned | 741_0  | Clustered           | 3 VC_741_0   | 3  | 0.038  | 0.88651    | 0.0337 | 0 | 0 | 0 | 1 Ref      |
| KR053201 | Unassigned | Unassigned | Unassigned | 789_0  | Clustered           | 34 VC_789_0  | 34 | 0.9167 | 1          | 0.9167 | 0 | 0 | 0 | 1 Ref      |
| KR054028 | Unassigned | Unassigned | Unassigned | 81_0   | Clustered           | 41 VC_81_0   | 41 | 0.5815 | 1          | 0.5815 | 0 | 0 | 0 | 0.9805 Ref |
| KR054029 | Unassigned | Unassigned | Unassigned | 486_0  | Clustered           | 47 VC_486_0  | 47 | 0.9022 | 1          | 0.9022 | 0 | 0 | 0 | 1 Ref      |
| KR054030 | Unassigned | Unassigned | Unassigned | 81_0   | Clustered           | 41 VC_81_0   | 41 | 0.5815 | 1          | 0.5815 | 0 | 0 | 0 | 0.9805 Ref |
| KR054031 | Unassigned | Unassigned | Unassigned | 434_0  | Clustered           | 45 VC_434_0  | 45 | 0.9479 | 1          | 0.9479 | 0 | 0 | 0 | 1 Ref      |
| KR054032 | Unassigned | Unassigned | Unassigned | 862_0  | Clustered           | 29 VC_862_0  | 29 | 0.8594 | 1          | 0.8594 | 0 | 0 | 0 | 1 Ref      |
| KR054033 | Unassigned | Unassigned | Unassigned | 80_7   | Clustered           | 33 VC_80_7   | 33 | 0.2156 | 1          | 0.2156 | 0 | 0 | 0 | 0.8409 Ref |
| KR060090 | Unassigned | Unassigned | Unassigned | 927_0  | Clustered           | 5 VC_927_0   | 5  | 0.4988 | 0.99999981 | 0.4988 | 0 | 0 | 0 | 1 Ref      |
| KR063267 | Unassigned | Unassigned | Unassigned | 904_0  | Clustered           | 10 VC_904_0  | 10 | 0.9878 | 0.99948433 | 0.9873 | 0 | 0 | 0 | 1 Ref      |
| KR063268 | Unassigned | Unassigned | Unassigned | 904_0  | Clustered           | 10 VC_904_0  | 10 | 0.9878 | 0.99948433 | 0.9873 | 0 | 0 | 0 | 1 Ref      |
| KR063278 | Unassigned | Unassigned | Unassigned | 893_0  | Clustered           | 4 VC_893_0   | 4  | 0.0787 | 0.99998595 | 0.0787 | 0 | 0 | 0 | 1 Ref      |
| KR063279 | Unassigned | Unassigned | Unassigned | 894_0  | Clustered           | 6 VC_894_0   | 6  | 0.3171 | 1          | 0.3171 | 0 | 0 | 0 | 1 Ref      |
| KR063280 | Unassigned | Unassigned | Unassigned | 1139_0 | Clustered           | 5 VC_1139_0  | 5  | 0.8556 | 0.99869977 | 0.8545 | 0 | 0 | 0 | 1 Ref      |
| KR063281 | Unassigned | Unassigned | Unassigned | 1141_1 | Clustered/Singleton | 1 VC_1141_1  | 1  | 0      | 1          | 0      | 0 | 0 | 0 | 1 Ref      |
| KR072689 | Unassigned | Unassigned | Unassigned | 955_0  | Clustered           | 2 VC_955_0   | 2  | 0.2751 | 0.89435023 | 0.2461 | 0 | 0 | 0 | 1 Ref      |
| KR073660 | Unassigned | Unassigned | Unassigned | 235_0  | Clustered           | 60 VC_235_0  | 60 | 0.9413 | 1          | 0.9413 | 0 | 0 | 0 | 1 Ref      |
| KR073661 | Unassigned | Unassigned | Unassigned | 235_0  | Clustered           | 60 VC_235_0  | 60 | 0.9413 | 1          | 0.9413 | 0 | 0 | 0 | 1 Ref      |
| KR080193 | Unassigned | Unassigned | Unassigned | 227_0  | Clustered           | 4 VC_227_0   | 4  | 0.0609 | 0.99998808 | 0.0609 | 0 | 0 | 0 | 1 Ref      |
| KR080194 | Unassigned | Unassigned | Unassigned | 385_0  | Clustered           | 24 VC_385_0  | 24 | 0.5516 | 1          | 0.5516 | 0 | 0 | 0 | 1 Ref      |
| KR080195 | Unassigned | Unassigned | Unassigned | 537_0  | Clustered           | 39 VC_537_0  | 39 | 0.8148 | 1          | 0.8148 | 0 | 0 | 0 | 1 Ref      |
| KR080196 | Unassigned | Unassigned | Unassigned | 579_20 | Clustered           | 17 VC_579_20 | 17 | 0.0538 | 1          | 0.0538 | 0 | 0 | 0 | 0.9926 Ref |
| KR080197 | Unassigned | Unassigned | Unassigned | 784_0  | Clustered           | 9 VC_784_0   | 9  | 0.0884 | 1          | 0.0884 | 0 | 0 | 0 | 1 Ref      |
| KR080198 | Unassigned | Unassigned | Unassigned | 784_0  | Clustered           | 9 VC_784_0   | 9  | 0.0884 | 1          | 0.0884 | 0 | 0 | 0 | 1 Ref      |
| KR080199 | Unassigned | Unassigned | Unassigned | 385_1  | Clustered           | 9 VC_385_1   | 9  | 0.1928 | 1          | 0.1928 | 0 | 0 | 0 | 1 Ref      |
| KR080200 | Unassigned | Unassigned | Unassigned | 385_0  | Clustered           | 24 VC_385_0  | 24 | 0.5516 | 1          | 0.5516 | 0 | 0 | 0 | 1 Ref      |
| KR080201 | Unassigned | Unassigned | Unassigned | 335_49 | Clustered           | 17 VC_335_49 | 17 | 0.0731 | 1          | 0.0731 | 0 | 0 | 0 | 0.7721 Ref |
| KR080202 | Unassigned | Unassigned | Unassigned | 784_0  | Clustered           | 9 VC_784_0   | 9  | 0.0884 | 1          | 0.0884 | 0 | 0 | 0 | 1 Ref      |
| KR080203 | Unassigned | Unassigned | Unassigned | 527_0  | Clustered           | 37 VC_527_0  | 37 | 0.9679 | 1          | 0.9679 | 0 | 0 | 0 | 1 Ref      |
| KR080204 | Unassigned | Unassigned | Unassigned | 571_2  | Clustered           | 17 VC_571_2  | 17 | 0.0965 | 1          | 0.0965 | 0 | 0 | 0 | 0.9779 Ref |
| KR080205 | Unassigned | Unassigned | Unassigned | 527_0  | Clustered           | 37 VC_527_0  | 37 | 0.9679 | 1          | 0.9679 | 0 | 0 | 0 | 1 Ref      |
| KR080206 | Unassigned | Unassigned | Unassigned | 244_1  | Clustered           | 13 VC_244_1  | 13 | 0.1766 | 1          | 0.1766 | 0 | 0 | 0 | 0.7308 Ref |
| KR091952 | Unassigned | Unassigned | Unassigned | 131_0  | Clustered           | 43 VC_131_0  | 43 | 0.8853 | 1          | 0.8853 | 0 | 0 | 0 | 1 Ref      |
| KR093625 | Unassigned | Unassigned | Unassigned | 966_0  | Clustered           | 8 VC_966_0   | 8  | 0.3637 | 1          | 0.3637 | 0 | 0 | 0 | 1 Ref      |
| KR093626 | Unassigned | Unassigned | Unassigned | 966_0  | Clustered           | 8 VC_966_0   | 8  | 0.3637 | 1          | 0.3637 | 0 | 0 | 0 | 1 Ref      |
| KR093627 | Unassigned | Unassigned | Unassigned | 966_0  | Clustered           | 8 VC_966_0   | 8  | 0.3637 | 1          | 0.3637 | 0 | 0 | 0 | 1 Ref      |
| KR093628 | Unassigned | Unassigned | Unassigned | 966_0  | Clustered           | 8 VC_966_0   | 8  | 0.3637 | 1          | 0.3637 | 0 | 0 | 0 | 1 Ref      |
| KR093629 | Unassigned | Unassigned | Unassigned | 966_0  | Clustered           | 8 VC_966_0   | 8  | 0.3637 | 1          | 0.3637 | 0 | 0 | 0 | 1 Ref      |
| KR093630 | Unassigned | Unassigned | Unassigned | 966_0  | Clustered           | 8 VC_966_0   | 8  | 0.3637 | 1          | 0.3637 | 0 | 0 | 0 | 1 Ref      |
| KR093631 | Unassigned | Unassigned | Unassigned | 966_0  | Clustered           | 8 VC_966_0   | 8  | 0.3637 | 1          | 0.3637 | 0 | 0 | 0 | 1 Ref      |
| KR093633 | Unassigned | Unassigned | Unassigned | 966_0  | Clustered           | 8 VC_966_0   | 8  | 0.3637 | 1          | 0.3637 | 0 | 0 | 0 | 1 Ref      |
| KR093634 | Unassigned | Unassigned | Unassigned | 623_0  | Clustered           | 22 VC_623_0  | 22 | 0.784  | 1          | 0.784  | 0 | 0 | 0 | 1 Ref      |
| KR093635 | Unassigned | Unassigned | Unassigned | 623_0  | Clustered           | 22 VC_623_0  | 22 | 0.784  | 1          | 0.784  | 0 | 0 | 0 | 1 Ref      |
| KR093636 | Unassigned | Unassigned | Unassigned | 623_0  | Clustered           | 22 VC_623_0  | 22 | 0.784  | 1          | 0.784  | 0 | 0 | 0 | 1 Ref      |
| KR093637 | Unassigned | Unassigned | Unassigned | 623_0  | Clustered           | 22 VC_623_0  | 22 | 0.784  | 1          | 0.784  | 0 | 0 | 0 | 1 Ref      |
| KR093639 | Unassigned | Unassigned | Unassigned | 623_0  | Clustered           | 22 VC_623_0  | 22 | 0.784  | 1          | 0.784  | 0 | 0 | 0 | 1 Ref      |
| KR093640 | Unassigned | Unassigned | Unassigned | 623_0  | Clustered           | 22 VC_623_0  | 22 | 0.784  | 1          | 0.784  | 0 | 0 | 0 | 1 Ref      |
| KR093641 | Unassigned | Unassigned | Unassigned | 623_0  | Clustered           | 22 VC_623_0  | 22 | 0.784  | 1          | 0.784  | 0 | 0 | 0 | 1 Ref      |
| KR093642 | Unassigned | Unassigned | Unassigned | 623_0  | Clustered           | 22 VC_623_0  | 22 | 0.784  | 1          | 0.784  | 0 | 0 | 0 | 1 Ref      |



|          |            |            |            |         |                     |              |     |        |            |        |   |   |   |            |
|----------|------------|------------|------------|---------|---------------------|--------------|-----|--------|------------|--------|---|---|---|------------|
| KR093643 | Unassigned | Unassigned | Unassigned | 623_0   | Clustered           | 22 VC_623_0  | 22  | 0.784  | 1          | 0.784  | 0 | 0 | 0 | 1 Ref      |
| KR093644 | Unassigned | Unassigned | Unassigned | 623_0   | Clustered           | 22 VC_623_0  | 22  | 0.784  | 1          | 0.784  | 0 | 0 | 0 | 1 Ref      |
| KR093645 | Unassigned | Unassigned | Unassigned | 623_0   | Clustered           | 22 VC_623_0  | 22  | 0.784  | 1          | 0.784  | 0 | 0 | 0 | 1 Ref      |
| KR093646 | Unassigned | Unassigned | Unassigned | 623_0   | Clustered           | 22 VC_623_0  | 22  | 0.784  | 1          | 0.784  | 0 | 0 | 0 | 1 Ref      |
| KR093647 | Unassigned | Unassigned | Unassigned | 623_0   | Clustered           | 22 VC_623_0  | 22  | 0.784  | 1          | 0.784  | 0 | 0 | 0 | 1 Ref      |
| KR093648 | Unassigned | Unassigned | Unassigned | 623_0   | Clustered           | 22 VC_623_0  | 22  | 0.784  | 1          | 0.784  | 0 | 0 | 0 | 1 Ref      |
| KR093649 | Unassigned | Unassigned | Unassigned | 623_0   | Clustered           | 22 VC_623_0  | 22  | 0.784  | 1          | 0.784  | 0 | 0 | 0 | 1 Ref      |
| KR093650 | Unassigned | Unassigned | Unassigned | 623_0   | Clustered           | 22 VC_623_0  | 22  | 0.784  | 1          | 0.784  | 0 | 0 | 0 | 1 Ref      |
| KR093651 | Unassigned | Unassigned | Unassigned | 623_0   | Clustered           | 22 VC_623_0  | 22  | 0.784  | 1          | 0.784  | 0 | 0 | 0 | 1 Ref      |
| KR093652 | Unassigned | Unassigned | Unassigned | 623_0   | Clustered           | 22 VC_623_0  | 22  | 0.784  | 1          | 0.784  | 0 | 0 | 0 | 1 Ref      |
| KR093653 | Unassigned | Unassigned | Unassigned | 623_0   | Clustered           | 22 VC_623_0  | 22  | 0.784  | 1          | 0.784  | 0 | 0 | 0 | 1 Ref      |
| KR093654 | Unassigned | Unassigned | Unassigned | 623_0   | Clustered           | 22 VC_623_0  | 22  | 0.784  | 1          | 0.784  | 0 | 0 | 0 | 1 Ref      |
| KR093655 | Unassigned | Unassigned | Unassigned | 623_0   | Clustered           | 22 VC_623_0  | 22  | 0.784  | 1          | 0.784  | 0 | 0 | 0 | 1 Ref      |
| KR093656 | Unassigned | Unassigned | Unassigned | 623_0   | Clustered           | 22 VC_623_0  | 22  | 0.784  | 1          | 0.784  | 0 | 0 | 0 | 1 Ref      |
| KR131750 | Unassigned | Unassigned | Unassigned | 711_0   | Clustered           | 48 VC_711_0  | 48  | 0.8217 | 1          | 0.8217 | 0 | 0 | 0 | 1 Ref      |
| KR136259 | Unassigned | Unassigned | Unassigned | 1050_0  | Clustered           | 2 VC_1050_0  | 2   | 0.9703 | 0.81445332 | 0.7903 | 0 | 0 | 0 | 1 Ref      |
| KR136260 | Unassigned | Unassigned | Unassigned | 1050_0  | Clustered           | 2 VC_1050_0  | 2   | 0.9703 | 0.81445332 | 0.7903 | 0 | 0 | 0 | 1 Ref      |
| KR149290 | Unassigned | Unassigned | Unassigned | 714_0   | Clustered           | 71 VC_714_0  | 71  | 0.935  | 1          | 0.935  | 0 | 0 | 0 | 1 Ref      |
| KR149291 | Unassigned | Unassigned | Unassigned | 848_0   | Clustered           | 124 VC_848_0 | 124 | 0.9484 | 1          | 0.9484 | 0 | 0 | 0 | 1 Ref      |
| KR153145 | Unassigned | Unassigned | Unassigned | 477_0   | Clustered           | 4 VC_477_0   | 4   | 0.7825 | 0.99997292 | 0.7825 | 0 | 0 | 0 | 1 Ref      |
| KR233164 | Unassigned | Unassigned | Unassigned | 198_27  | Clustered/Singleton | 1 VC_198_27  | 1   | 0      | 1          | 0      | 0 | 0 | 0 | 1 Ref      |
| KR233165 | Unassigned | Unassigned | Unassigned | 290_163 | Clustered           | 2 VC_290_163 | 2   | 0.0029 | 0.93227927 | 0.0027 | 0 | 0 | 0 | 1 Ref      |
| KR262148 | Unassigned | Unassigned | Unassigned | 972_0   | Clustered           | 99 VC_972_0  | 99  | 0.9113 | 1          | 0.9113 | 0 | 0 | 0 | 0.9928 Ref |
| KR269718 | Unassigned | Unassigned | Unassigned | 290_81  | Clustered/Singleton | 1 VC_290_81  | 1   | 0      | 1          | 0      | 0 | 0 | 0 | 1 Ref      |
| KR269719 | Unassigned | Unassigned | Unassigned | 971_0   | Clustered           | 40 VC_971_0  | 40  | 0.6793 | 1          | 0.6793 | 0 | 0 | 0 | 0.9359 Ref |
| KR269720 | Unassigned | Unassigned | Unassigned | 509_0   | Clustered           | 36 VC_509_0  | 36  | 0.5291 | 1          | 0.5291 | 0 | 0 | 0 | 0.9714 Ref |
| KR270151 | Unassigned | Unassigned | Unassigned | 654_0   | Clustered           | 115 VC_654_0 | 115 | 0.7303 | 1          | 0.7303 | 0 | 0 | 0 | 0.8764 Ref |
| KR296686 | Unassigned | Unassigned | Unassigned | 30_1    | Clustered           | 53 VC_30_1   | 53  | 0.7151 | 1          | 0.7151 | 0 | 0 | 0 | 0.9325 Ref |
| KR296687 | Unassigned | Unassigned | Unassigned | 30_1    | Clustered           | 53 VC_30_1   | 53  | 0.7151 | 1          | 0.7151 | 0 | 0 | 0 | 0.9325 Ref |
| KR296688 | Unassigned | Unassigned | Unassigned | 30_1    | Clustered           | 53 VC_30_1   | 53  | 0.7151 | 1          | 0.7151 | 0 | 0 | 0 | 0.9325 Ref |
| KR296689 | Unassigned | Unassigned | Unassigned | 611_0   | Clustered           | 50 VC_611_0  | 50  | 0.7306 | 1          | 0.7306 | 0 | 0 | 0 | 1 Ref      |
| KR296691 | Unassigned | Unassigned | Unassigned | 611_0   | Clustered           | 50 VC_611_0  | 50  | 0.7306 | 1          | 0.7306 | 0 | 0 | 0 | 1 Ref      |
| KR296692 | Unassigned | Unassigned | Unassigned | 135_18  | Clustered/Singleton | 1 VC_135_18  | 1   | 0      | 1          | 0      | 0 | 0 | 0 | 1 Ref      |
| KR337643 | Unassigned | Unassigned | Unassigned | 787_0   | Clustered           | 132 VC_787_0 | 132 | 1      | 1          | 1      | 0 | 0 | 0 | 1 Ref      |
| KR337644 | Unassigned | Unassigned | Unassigned | 787_0   | Clustered           | 132 VC_787_0 | 132 | 1      | 1          | 1      | 0 | 0 | 0 | 1 Ref      |
| KR337645 | Unassigned | Unassigned | Unassigned | 787_0   | Clustered           | 132 VC_787_0 | 132 | 1      | 1          | 1      | 0 | 0 | 0 | 1 Ref      |
| KR337646 | Unassigned | Unassigned | Unassigned | 787_0   | Clustered           | 132 VC_787_0 | 132 | 1      | 1          | 1      | 0 | 0 | 0 | 1 Ref      |
| KR337647 | Unassigned | Unassigned | Unassigned | 787_0   | Clustered           | 132 VC_787_0 | 132 | 1      | 1          | 1      | 0 | 0 | 0 | 1 Ref      |
| KR337648 | Unassigned | Unassigned | Unassigned | 787_0   | Clustered           | 132 VC_787_0 | 132 | 1      | 1          | 1      | 0 | 0 | 0 | 1 Ref      |
| KR337649 | Unassigned | Unassigned | Unassigned | 787_0   | Clustered           | 132 VC_787_0 | 132 | 1      | 1          | 1      | 0 | 0 | 0 | 1 Ref      |
| KR337650 | Unassigned | Unassigned | Unassigned | 787_0   | Clustered           | 132 VC_787_0 | 132 | 1      | 1          | 1      | 0 | 0 | 0 | 1 Ref      |
| KR337651 | Unassigned | Unassigned | Unassigned | 787_0   | Clustered           | 132 VC_787_0 | 132 | 1      | 1          | 1      | 0 | 0 | 0 | 1 Ref      |
| KR337652 | Unassigned | Unassigned | Unassigned | 787_0   | Clustered           | 132 VC_787_0 | 132 | 1      | 1          | 1      | 0 | 0 | 0 | 1 Ref      |
| KR337653 | Unassigned | Unassigned | Unassigned | 787_0   | Clustered           | 132 VC_787_0 | 132 | 1      | 1          | 1      | 0 | 0 | 0 | 1 Ref      |
| KR337654 | Unassigned | Unassigned | Unassigned | 787_0   | Clustered           | 132 VC_787_0 | 132 | 1      | 1          | 1      | 0 | 0 | 0 | 1 Ref      |
| KR347352 | Unassigned | Unassigned | Unassigned | 787_0   | Clustered           | 132 VC_787_0 | 132 | 1      | 1          | 1      | 0 | 0 | 0 | 1 Ref      |
| KR347353 | Unassigned | Unassigned | Unassigned | 787_0   | Clustered           | 132 VC_787_0 | 132 | 1      | 1          | 1      | 0 | 0 | 0 | 1 Ref      |
| KR347354 | Unassigned | Unassigned | Unassigned | 787_0   | Clustered           | 132 VC_787_0 | 132 | 1      | 1          | 1      | 0 | 0 | 0 | 1 Ref      |
| KR347355 | Unassigned | Unassigned | Unassigned | 787_0   | Clustered           | 132 VC_787_0 | 132 | 1      | 1          | 1      | 0 | 0 | 0 | 1 Ref      |
| KR422352 | Unassigned | Unassigned | Unassigned | 293_1   | Clustered           | 21 VC_293_1  | 21  | 0.1694 | 1          | 0.1694 | 0 | 0 | 0 | 0.9048 Ref |
| KR422353 | Unassigned | Unassigned | Unassigned | 198_10  | Clustered/Singleton | 1 VC_198_10  | 1   | 0      | 1          | 0      | 0 | 0 | 0 | 1 Ref      |
| KR534323 | Unassigned | Unassigned | Unassigned | 514_2   | Clustered/Singleton | 1 VC_514_2   | 1   | 0      | 1          | 0      | 0 | 0 | 0 | 1 Ref      |
| KR537871 | Unassigned | Unassigned | Unassigned | 766_0   | Clustered           | 40 VC_766_0  | 40  | 0.7511 | 1          | 0.7511 | 0 | 0 | 0 | 1 Ref      |
| KR537872 | Unassigned | Unassigned | Unassigned | 766_0   | Clustered           | 40 VC_766_0  | 40  | 0.7511 | 1          | 0.7511 | 0 | 0 | 0 | 1 Ref      |
| KR560069 | Unassigned | Unassigned | Unassigned | 524_0   | Clustered           | 8 VC_524_0   | 8   | 0.7365 | 1          | 0.7365 | 0 | 0 | 0 | 1 Ref      |
| KR604693 | Unassigned | Unassigned | Unassigned | 1018_0  | Clustered           | 38 VC_1018_0 | 38  | 0.9757 | 1          | 0.9757 | 0 | 0 | 0 | 1 Ref      |
| KR698074 | Unassigned | Unassigned | Unassigned | 794_8   | Clustered           | 2 VC_794_8   | 2   | 0.006  | 0.58293682 | 0.0035 | 0 | 0 | 0 | 1 Ref      |
| KR704913 | Unassigned | Unassigned | Unassigned | 1144_0  | Clustered           | 2 VC_1144_0  | 2   | 1      | 1          | 1      | 0 | 0 | 0 | 1 Ref      |
| KR704915 | Unassigned | Unassigned | Unassigned | 1144_0  | Clustered           | 2 VC_1144_0  | 2   | 1      | 1          | 1      | 0 | 0 | 0 | 1 Ref      |
| KR709302 | Unassigned | Unassigned | Unassigned | 12_2    | Clustered           | 19 VC_12_2   | 19  | 0.2009 | 1          | 0.2009 | 0 | 0 | 0 | 1 Ref      |
| KR709303 | Unassigned | Unassigned | Unassigned | 12_2    | Clustered           | 19 VC_12_2   | 19  | 0.2009 | 1          | 0.2009 | 0 | 0 | 0 | 1 Ref      |
| KR781349 | Unassigned | Unassigned | Unassigned | 384_21  | Clustered           | 2 VC_384_21  | 2   | 0.0033 | 0.95771013 | 0.0032 | 0 | 0 | 0 | 1 Ref      |
| KR781488 | Unassigned | Unassigned | Unassigned | 44_0    | Clustered           | 49 VC_44_0   | 49  | 0.4506 | 1          | 0.4506 | 0 | 0 | 0 | 0.8605 Ref |
| KR816508 | Unassigned | Unassigned | Unassigned | 384_18  | Clustered           | 10 VC_384_18 | 10  | 0.0301 | 1          | 0.0301 | 0 | 0 | 0 | 0.8 Ref    |
| KR824843 | Unassigned | Unassigned | Unassigned | 538_2   | Clustered/Singleton | 1 VC_538_2   | 1   | 0      | 1          | 0      | 0 | 0 | 0 | 1 Ref      |
| KR869157 | Unassigned | Unassigned | Unassigned | 80_0    | Clustered           | 64 VC_80_0   | 64  | 0.418  | 1          | 0.418  | 0 | 0 | 0 | 0.7649 Ref |
| KR869820 | Unassigned | Unassigned | Unassigned | 687_1   | Clustered           | 10 VC_687_1  | 10  | 0.1263 | 1          | 0.1263 | 0 | 0 | 0 | 0.9778 Ref |
| KR902361 | Unassigned | Unassigned | Unassigned | 155_8   | Clustered           | 66 VC_155_8  | 66  | 0.4537 | 1          | 0.4537 | 0 | 0 | 0 | 0.8182 Ref |
| KR902978 | Unassigned | Unassigned | Unassigned | 787_0   | Clustered           | 132 VC_787_0 | 132 | 1      | 1          | 1      | 0 | 0 | 0 | 1 Ref      |
| KR902979 | Unassigned | Unassigned | Unassigned | 787_0   | Clustered           | 132 VC_787_0 | 132 | 1      | 1          | 1      | 0 | 0 | 0 | 1 Ref      |
| KR902980 | Unassigned | Unassigned | Unassigned | 787_0   | Clustered           | 132 VC_787_0 | 132 | 1      | 1          | 1      | 0 | 0 | 0 | 1 Ref      |
| KR902981 | Unassigned | Unassigned | Unassigned | 787_0   | Clustered           | 132 VC_787_0 | 132 | 1      | 1          | 1      | 0 | 0 | 0 | 1 Ref      |
| KR902982 | Unassigned | Unassigned | Unassigned | 787_0   | Clustered           | 132 VC_787_0 | 132 | 1      | 1          | 1      | 0 | 0 | 0 | 1 Ref      |
| KR902983 | Unassigned | Unassigned | Unassigned | 787_0   | Clustered           | 132 VC_787_0 | 132 | 1      | 1          | 1      | 0 | 0 | 0 | 1 Ref      |
| KR902984 | Unassigned | Unassigned | Unassigned | 787_0   | Clustered           | 132 VC_787_0 | 132 | 1      | 1          | 1      | 0 | 0 | 0 | 1 Ref      |
| KR902985 | Unassigned | Unassigned | Unassigned | 787_0   | Clustered           | 132 VC_787_0 | 132 | 1      | 1          | 1      | 0 | 0 | 0 | 1 Ref      |
| KR902986 | Unassigned | Unassigned | Unassigned | 787_0   | Clustered           | 132 VC_787_0 | 132 | 1      | 1          | 1      | 0 | 0 | 0 | 1 Ref      |
| KR902987 | Unassigned | Unassigned | Unassigned | 787_0   | Clustered           | 132 VC_787_0 | 132 | 1      | 1          | 1      | 0 | 0 | 0 | 1 Ref      |
| KR905068 | Unassigned | Unassigned | Unassigned | 396_0   | Clustered           | 3 VC_396_0   | 3   | 0.3827 | 0.99764103 | 0.3818 | 0 | 0 | 0 | 1 Ref      |
| KR908644 | Unassigned | Unassigned | Unassigned | 155_8   | Clustered           | 66 VC_155_8  | 66  | 0.4537 | 1          | 0.4537 | 0 | 0 | 0 | 0.8182 Ref |
| KR935213 | Unassigned | Unassigned | Unassigned | 766_0   | Clustered           | 40 VC_766_0  | 40  | 0.7511 | 1          | 0.7511 | 0 | 0 | 0 | 1 Ref      |



|          |            |            |            |        |                     |               |     |        |            |        |   |   |   |            |
|----------|------------|------------|------------|--------|---------------------|---------------|-----|--------|------------|--------|---|---|---|------------|
| KR935214 | Unassigned | Unassigned | Unassigned | 538_73 | Clustered           | 2 VC_538_73   | 2   | 0.0107 | 0.95762743 | 0.0102 | 0 | 0 | 0 | 1 Ref      |
| KR935215 | Unassigned | Unassigned | Unassigned | 766_0  | Clustered           | 40 VC_766_0   | 40  | 0.7511 | 1          | 0.7511 | 0 | 0 | 0 | 1 Ref      |
| KR935216 | Unassigned | Unassigned | Unassigned | 903_0  | Clustered           | 3 VC_903_0    | 3   | 0.6217 | 0.99814904 | 0.6206 | 0 | 0 | 0 | 1 Ref      |
| KR935217 | Unassigned | Unassigned | Unassigned | 903_0  | Clustered           | 3 VC_903_0    | 3   | 0.6217 | 0.99814904 | 0.6206 | 0 | 0 | 0 | 1 Ref      |
| KR997929 | Unassigned | Unassigned | Unassigned | 335_7  | Clustered           | 3 VC_335_7    | 3   | 0.0085 | 0.99739782 | 0.0085 | 0 | 0 | 0 | 0.6667 Ref |
| KR997930 | Unassigned | Unassigned | Unassigned | 538_35 | Clustered           | 3 VC_538_35   | 3   | 0.0249 | 0.99859857 | 0.0249 | 0 | 0 | 0 | 1 Ref      |
| KR997931 | Unassigned | Unassigned | Unassigned | 538_35 | Clustered           | 3 VC_538_35   | 3   | 0.0249 | 0.99859857 | 0.0249 | 0 | 0 | 0 | 1 Ref      |
| KR997932 | Unassigned | Unassigned | Unassigned | 526_0  | Clustered           | 32 VC_526_0   | 32  | 0.9037 | 1          | 0.9037 | 0 | 0 | 0 | 1 Ref      |
| KR997933 | Unassigned | Unassigned | Unassigned | 589_0  | Clustered           | 3 VC_589_0    | 3   | 0.2072 | 0.99849937 | 0.2069 | 0 | 0 | 0 | 1 Ref      |
| KR997934 | Unassigned | Unassigned | Unassigned | 335_7  | Clustered           | 3 VC_335_7    | 3   | 0.0085 | 0.99739782 | 0.0085 | 0 | 0 | 0 | 0.6667 Ref |
| KR997967 | Unassigned | Unassigned | Unassigned | 384_1  | Clustered           | 11 VC_384_1   | 11  | 0.0378 | 1          | 0.0378 | 0 | 0 | 0 | 0.8545 Ref |
| KR997968 | Unassigned | Unassigned | Unassigned | 538_35 | Clustered           | 3 VC_538_35   | 3   | 0.0249 | 0.99859857 | 0.0249 | 0 | 0 | 0 | 1 Ref      |
| KT001911 | Unassigned | Unassigned | Unassigned | 1071_0 | Clustered           | 7 VC_1071_0   | 7   | 0.9883 | 0.99999504 | 0.9883 | 0 | 0 | 0 | 1 Ref      |
| KT001912 | Unassigned | Unassigned | Unassigned | 104_0  | Clustered           | 2 VC_104_0    | 2   | 0.1066 | 0.94642368 | 0.1008 | 0 | 0 | 0 | 1 Ref      |
| KT001913 | Unassigned | Unassigned | Unassigned | 176_0  | Clustered/Singleton | 1 VC_176_0    | 1   | 0      | 1          | 0      | 0 | 0 | 0 | 1 Ref      |
| KT001914 | Unassigned | Unassigned | Unassigned | 1132_0 | Clustered           | 4 VC_1132_0   | 4   | 1      | 1          | 1      | 0 | 0 | 0 | 1 Ref      |
| KT001916 | Unassigned | Unassigned | Unassigned | 341_0  | Clustered           | 27 VC_341_0   | 27  | 0.5058 | 1          | 0.5058 | 0 | 0 | 0 | 0.8661 Ref |
| KT001917 | Unassigned | Unassigned | Unassigned | 794_19 | Clustered           | 16 VC_794_19  | 16  | 0.0975 | 0.99616626 | 0.0971 | 0 | 0 | 0 | 0.8083 Ref |
| KT001918 | Unassigned | Unassigned | Unassigned | 686_0  | Clustered           | 25 VC_686_0   | 25  | 0.5501 | 1          | 0.5501 | 0 | 0 | 0 | 0.96 Ref   |
| KT001919 | Unassigned | Unassigned | Unassigned | 686_0  | Clustered           | 25 VC_686_0   | 25  | 0.5501 | 1          | 0.5501 | 0 | 0 | 0 | 0.96 Ref   |
| KT001920 | Unassigned | Unassigned | Unassigned | 972_0  | Clustered           | 99 VC_972_0   | 99  | 0.9113 | 1          | 0.9113 | 0 | 0 | 0 | 0.9928 Ref |
| KT004677 | Unassigned | Unassigned | Unassigned | 974_0  | Clustered           | 34 VC_974_0   | 34  | 0.7953 | 1          | 0.7953 | 0 | 0 | 0 | 1 Ref      |
| KT008108 | Unassigned | Unassigned | Unassigned | 398_0  | Clustered           | 51 VC_398_0   | 51  | 0.8741 | 1          | 0.8741 | 0 | 0 | 0 | 1 Ref      |
| KT020852 | Unassigned | Unassigned | Unassigned | 571_7  | Clustered           | 28 VC_571_7   | 28  | 0.1651 | 1          | 0.1651 | 0 | 0 | 0 | 0.8519 Ref |
| KT070866 | Unassigned | Unassigned | Unassigned | 1042_0 | Clustered           | 8 VC_1042_0   | 8   | 0.7385 | 1          | 0.7385 | 0 | 0 | 0 | 1 Ref      |
| KT070867 | Unassigned | Unassigned | Unassigned | 489_6  | Clustered/Singleton | 1 VC_489_6    | 1   | 0      | 1          | 0      | 0 | 0 | 0 | 1 Ref      |
| KT124227 | Unassigned | Unassigned | Unassigned | 1016_0 | Clustered           | 62 VC_1016_0  | 62  | 0.8638 | 1          | 0.8638 | 0 | 0 | 0 | 0.743 Ref  |
| KT124228 | Unassigned | Unassigned | Unassigned | 1016_0 | Clustered           | 62 VC_1016_0  | 62  | 0.8638 | 1          | 0.8638 | 0 | 0 | 0 | 0.743 Ref  |
| KT124229 | Unassigned | Unassigned | Unassigned | 1016_0 | Clustered           | 62 VC_1016_0  | 62  | 0.8638 | 1          | 0.8638 | 0 | 0 | 0 | 0.743 Ref  |
| KT151955 | Unassigned | Unassigned | Unassigned | 735_0  | Clustered           | 2 VC_735_0    | 2   | 0.5598 | 0.89435023 | 0.5007 | 0 | 0 | 0 | 1 Ref      |
| KT151956 | Unassigned | Unassigned | Unassigned | 142_0  | Clustered           | 6 VC_142_0    | 6   | 0.7366 | 1          | 0.7366 | 0 | 0 | 0 | 1 Ref      |
| KT151957 | Unassigned | Unassigned | Unassigned | 735_0  | Clustered           | 2 VC_735_0    | 2   | 0.5598 | 0.89435023 | 0.5007 | 0 | 0 | 0 | 1 Ref      |
| KT151958 | Unassigned | Unassigned | Unassigned | 142_0  | Clustered           | 6 VC_142_0    | 6   | 0.7366 | 1          | 0.7366 | 0 | 0 | 0 | 1 Ref      |
| KT152029 | Unassigned | Unassigned | Unassigned | 1016_0 | Clustered           | 62 VC_1016_0  | 62  | 0.8638 | 1          | 0.8638 | 0 | 0 | 0 | 0.743 Ref  |
| KT160311 | Unassigned | Unassigned | Unassigned | 516_0  | Clustered           | 24 VC_516_0   | 24  | 0.8556 | 1          | 0.8556 | 0 | 0 | 0 | 0.9493 Ref |
| KT176190 | Unassigned | Unassigned | Unassigned | 297_5  | Clustered           | 14 VC_297_5   | 14  | 0.141  | 1          | 0.141  | 0 | 0 | 0 | 0.9231 Ref |
| KT184308 | Unassigned | Unassigned | Unassigned | 290_66 | Clustered/Singleton | 1 VC_290_66   | 1   | 0      | 1          | 0      | 0 | 0 | 0 | 1 Ref      |
| KT184309 | Unassigned | Unassigned | Unassigned | 293_17 | Clustered           | 8 VC_293_17   | 8   | 0.0534 | 0.99997879 | 0.0534 | 0 | 0 | 0 | 0.6071 Ref |
| KT184310 | Unassigned | Unassigned | Unassigned | 293_17 | Clustered           | 8 VC_293_17   | 8   | 0.0534 | 0.99997879 | 0.0534 | 0 | 0 | 0 | 0.6071 Ref |
| KT184311 | Unassigned | Unassigned | Unassigned | 290_57 | Clustered/Singleton | 1 VC_290_57   | 1   | 0      | 1          | 0      | 0 | 0 | 0 | 1 Ref      |
| KT184312 | Unassigned | Unassigned | Unassigned | 290_63 | Clustered/Singleton | 1 VC_290_63   | 1   | 0      | 1          | 0      | 0 | 0 | 0 | 1 Ref      |
| KT184313 | Unassigned | Unassigned | Unassigned | 340_7  | Clustered           | 18 VC_340_7   | 18  | 0.0936 | 1          | 0.0936 | 0 | 0 | 0 | 0.7778 Ref |
| KT184314 | Unassigned | Unassigned | Unassigned | 340_7  | Clustered           | 18 VC_340_7   | 18  | 0.0936 | 1          | 0.0936 | 0 | 0 | 0 | 0.7778 Ref |
| KT184315 | Unassigned | Unassigned | Unassigned | 340_7  | Clustered           | 18 VC_340_7   | 18  | 0.0936 | 1          | 0.0936 | 0 | 0 | 0 | 0.7778 Ref |
| KT184316 | Unassigned | Unassigned | Unassigned | 340_7  | Clustered           | 18 VC_340_7   | 18  | 0.0936 | 1          | 0.0936 | 0 | 0 | 0 | 0.7778 Ref |
| KT184390 | Unassigned | Unassigned | Unassigned | 1016_0 | Clustered           | 62 VC_1016_0  | 62  | 0.8638 | 1          | 0.8638 | 0 | 0 | 0 | 0.743 Ref  |
| KT184391 | Unassigned | Unassigned | Unassigned | 1016_0 | Clustered           | 62 VC_1016_0  | 62  | 0.8638 | 1          | 0.8638 | 0 | 0 | 0 | 0.743 Ref  |
| KT184661 | Unassigned | Unassigned | Unassigned | 907_0  | Clustered           | 32 VC_907_0   | 32  | 0.9964 | 1          | 0.9964 | 0 | 0 | 0 | 1 Ref      |
| KT186228 | Unassigned | Unassigned | Unassigned | 1016_0 | Clustered           | 62 VC_1016_0  | 62  | 0.8638 | 1          | 0.8638 | 0 | 0 | 0 | 0.743 Ref  |
| KT186229 | Unassigned | Unassigned | Unassigned | 1016_0 | Clustered           | 62 VC_1016_0  | 62  | 0.8638 | 1          | 0.8638 | 0 | 0 | 0 | 0.743 Ref  |
| KT186243 | Unassigned | Unassigned | Unassigned | 8_0    | Clustered           | 58 VC_8_0     | 58  | 0.8285 | 1          | 0.8285 | 0 | 0 | 0 | 0.9946 Ref |
| KT187252 | Unassigned | Unassigned | Unassigned | 195_1  | Clustered           | 7 VC_195_1    | 7   | 0.1409 | 1          | 0.1409 | 0 | 0 | 0 | 1 Ref      |
| KT207918 | Unassigned | Unassigned | Unassigned | 913_0  | Clustered           | 28 VC_913_0   | 28  | 0.6206 | 1          | 0.6206 | 0 | 0 | 0 | 0.9841 Ref |
| KT221034 | Unassigned | Unassigned | Unassigned | 606_0  | Clustered           | 2 VC_606_0    | 2   | 0.3086 | 0.91192888 | 0.2814 | 0 | 0 | 0 | 1 Ref      |
| KT222940 | Unassigned | Unassigned | Unassigned | 834_0  | Clustered           | 18 VC_834_0   | 18  | 0.9116 | 1          | 0.9116 | 0 | 0 | 0 | 1 Ref      |
| KT222941 | Unassigned | Unassigned | Unassigned | 571_2  | Clustered           | 17 VC_571_2   | 17  | 0.0965 | 1          | 0.0965 | 0 | 0 | 0 | 0.9779 Ref |
| KT222942 | Unassigned | Unassigned | Unassigned | 571_2  | Clustered           | 17 VC_571_2   | 17  | 0.0965 | 1          | 0.0965 | 0 | 0 | 0 | 0.9779 Ref |
| KT224359 | Unassigned | Unassigned | Unassigned | 195_1  | Clustered           | 7 VC_195_1    | 7   | 0.1409 | 1          | 0.1409 | 0 | 0 | 0 | 1 Ref      |
| KT232076 | Unassigned | Unassigned | Unassigned | 45_0   | Clustered           | 38 VC_45_0    | 38  | 0.5785 | 1          | 0.5785 | 0 | 0 | 0 | 0.9659 Ref |
| KT239446 | Unassigned | Unassigned | Unassigned | 509_0  | Clustered           | 36 VC_509_0   | 36  | 0.5291 | 1          | 0.5291 | 0 | 0 | 0 | 0.9714 Ref |
| KT240186 | Unassigned | Unassigned | Unassigned | 1018_0 | Clustered           | 38 VC_1018_0  | 38  | 0.9757 | 1          | 0.9757 | 0 | 0 | 0 | 1 Ref      |
| KT246485 | Unassigned | Unassigned | Unassigned | 834_0  | Clustered           | 18 VC_834_0   | 18  | 0.9116 | 1          | 0.9116 | 0 | 0 | 0 | 1 Ref      |
| KT246486 | Unassigned | Unassigned | Unassigned | 974_0  | Clustered           | 34 VC_974_0   | 34  | 0.7953 | 1          | 0.7953 | 0 | 0 | 0 | 1 Ref      |
| KT253150 | Unassigned | Unassigned | Unassigned | 903_0  | Clustered           | 3 VC_903_0    | 3   | 0.6217 | 0.99814904 | 0.6206 | 0 | 0 | 0 | 1 Ref      |
| KT254130 | Unassigned | Unassigned | Unassigned | 81_0   | Clustered           | 41 VC_81_0    | 41  | 0.5815 | 1          | 0.5815 | 0 | 0 | 0 | 0.9805 Ref |
| KT254131 | Unassigned | Unassigned | Unassigned | 81_0   | Clustered           | 41 VC_81_0    | 41  | 0.5815 | 1          | 0.5815 | 0 | 0 | 0 | 0.9805 Ref |
| KT254132 | Unassigned | Unassigned | Unassigned | 81_0   | Clustered           | 41 VC_81_0    | 41  | 0.5815 | 1          | 0.5815 | 0 | 0 | 0 | 0.9805 Ref |
| KT254133 | Unassigned | Unassigned | Unassigned | 81_0   | Clustered           | 41 VC_81_0    | 41  | 0.5815 | 1          | 0.5815 | 0 | 0 | 0 | 0.9805 Ref |
| KT259047 | Unassigned | Unassigned | Unassigned | 335_23 | Clustered           | 17 VC_335_23  | 17  | 0.0714 | 1          | 0.0714 | 0 | 0 | 0 | 0.6397 Ref |
| KT264749 | Unassigned | Unassigned | Unassigned | 1145_0 | Clustered           | 164 VC_1145_0 | 164 | 0.8868 | 1          | 0.8868 | 0 | 0 | 0 | 1 Ref      |
| KT264750 | Unassigned | Unassigned | Unassigned | 1145_0 | Clustered           | 164 VC_1145_0 | 164 | 0.8868 | 1          | 0.8868 | 0 | 0 | 0 | 1 Ref      |
| KT264751 | Unassigned | Unassigned | Unassigned | 1145_0 | Clustered           | 164 VC_1145_0 | 164 | 0.8868 | 1          | 0.8868 | 0 | 0 | 0 | 1 Ref      |
| KT264752 | Unassigned | Unassigned | Unassigned | 1145_0 | Clustered           | 164 VC_1145_0 | 164 | 0.8868 | 1          | 0.8868 | 0 | 0 | 0 | 1 Ref      |
| KT264753 | Unassigned | Unassigned | Unassigned | 1145_0 | Clustered           | 164 VC_1145_0 | 164 | 0.8868 | 1          | 0.8868 | 0 | 0 | 0 | 1 Ref      |
| KT264754 | Unassigned | Unassigned | Unassigned | 1145_0 | Clustered           | 164 VC_1145_0 | 164 | 0.8868 | 1          | 0.8868 | 0 | 0 | 0 | 1 Ref      |
| KT264755 | Unassigned | Unassigned | Unassigned | 1145_0 | Clustered           | 164 VC_1145_0 | 164 | 0.8868 | 1          | 0.8868 | 0 | 0 | 0 | 1 Ref      |
| KT264756 | Unassigned | Unassigned | Unassigned | 1145_0 | Clustered           | 164 VC_1145_0 | 164 | 0.8868 | 1          | 0.8868 | 0 | 0 | 0 | 1 Ref      |
| KT264757 | Unassigned | Unassigned | Unassigned | 1145_0 | Clustered           | 164 VC_1145_0 | 164 | 0.8868 | 1          | 0.8868 | 0 | 0 | 0 | 1 Ref      |
| KT264758 | Unassigned | Unassigned | Unassigned | 1145_0 | Clustered           | 164 VC_1145_0 | 164 | 0.8868 | 1          | 0.8868 | 0 | 0 | 0 | 1 Ref      |
| KT264759 | Unassigned | Unassigned | Unassigned | 1145_0 | Clustered           | 164 VC_1145_0 | 164 | 0.8868 | 1          | 0.8868 | 0 | 0 | 0 | 1 Ref      |
| KT264760 | Unassigned | Unassigned | Unassigned | 1145_0 | Clustered           | 164 VC_1145_0 | 164 | 0.8868 | 1          | 0.8868 | 0 | 0 | 0 | 1 Ref      |



|           |            |            |            |        |                     |               |     |        |            |        |   |   |   |            |
|-----------|------------|------------|------------|--------|---------------------|---------------|-----|--------|------------|--------|---|---|---|------------|
| KT264761  | Unassigned | Unassigned | Unassigned | 1145_0 | Clustered           | 164 VC_1145_0 | 164 | 0.8868 | 1          | 0.8868 | 0 | 0 | 0 | 1 Ref      |
| KT264763  | Unassigned | Unassigned | Unassigned | 1145_0 | Clustered           | 164 VC_1145_0 | 164 | 0.8868 | 1          | 0.8868 | 0 | 0 | 0 | 1 Ref      |
| KT264764  | Unassigned | Unassigned | Unassigned | 1145_0 | Clustered           | 164 VC_1145_0 | 164 | 0.8868 | 1          | 0.8868 | 0 | 0 | 0 | 1 Ref      |
| KT264765  | Unassigned | Unassigned | Unassigned | 1145_0 | Clustered           | 164 VC_1145_0 | 164 | 0.8868 | 1          | 0.8868 | 0 | 0 | 0 | 1 Ref      |
| KT264766  | Unassigned | Unassigned | Unassigned | 1145_0 | Clustered           | 164 VC_1145_0 | 164 | 0.8868 | 1          | 0.8868 | 0 | 0 | 0 | 1 Ref      |
| KT264767  | Unassigned | Unassigned | Unassigned | 1145_0 | Clustered           | 164 VC_1145_0 | 164 | 0.8868 | 1          | 0.8868 | 0 | 0 | 0 | 1 Ref      |
| KT264768  | Unassigned | Unassigned | Unassigned | 1145_0 | Clustered           | 164 VC_1145_0 | 164 | 0.8868 | 1          | 0.8868 | 0 | 0 | 0 | 1 Ref      |
| KT264769  | Unassigned | Unassigned | Unassigned | 1145_0 | Clustered           | 164 VC_1145_0 | 164 | 0.8868 | 1          | 0.8868 | 0 | 0 | 0 | 1 Ref      |
| KT264770  | Unassigned | Unassigned | Unassigned | 1147_0 | Clustered           | 6 VC_1147_0   | 6   | 0.3066 | 0.99999957 | 0.3066 | 0 | 0 | 0 | 1 Ref      |
| KT264771  | Unassigned | Unassigned | Unassigned | 1145_0 | Clustered           | 164 VC_1145_0 | 164 | 0.8868 | 1          | 0.8868 | 0 | 0 | 0 | 1 Ref      |
| KT264772  | Unassigned | Unassigned | Unassigned | 1145_0 | Clustered           | 164 VC_1145_0 | 164 | 0.8868 | 1          | 0.8868 | 0 | 0 | 0 | 1 Ref      |
| KT264774  | Unassigned | Unassigned | Unassigned | 1145_0 | Clustered           | 164 VC_1145_0 | 164 | 0.8868 | 1          | 0.8868 | 0 | 0 | 0 | 1 Ref      |
| KT264775  | Unassigned | Unassigned | Unassigned | 1148_0 | Clustered           | 4 VC_1148_0   | 4   | 0.0503 | 0.99998999 | 0.0503 | 0 | 0 | 0 | 1 Ref      |
| KT264776  | Unassigned | Unassigned | Unassigned | 1155_0 | Clustered           | 14 VC_1155_0  | 14  | 0.8287 | 1          | 0.8287 | 0 | 0 | 0 | 1 Ref      |
| KT264779  | Unassigned | Unassigned | Unassigned | 1145_0 | Clustered           | 164 VC_1145_0 | 164 | 0.8868 | 1          | 0.8868 | 0 | 0 | 0 | 1 Ref      |
| KT264781  | Unassigned | Unassigned | Unassigned | 1156_0 | Clustered           | 5 VC_1156_0   | 5   | 0.4454 | 0.99999977 | 0.4454 | 0 | 0 | 0 | 1 Ref      |
| KT264782  | Unassigned | Unassigned | Unassigned | 1161_0 | Clustered           | 16 VC_1161_0  | 16  | 0.4834 | 0.99999958 | 0.4834 | 0 | 0 | 0 | 1 Ref      |
| KT264783  | Unassigned | Unassigned | Unassigned | 1161_0 | Clustered           | 16 VC_1161_0  | 16  | 0.4834 | 0.99999958 | 0.4834 | 0 | 0 | 0 | 1 Ref      |
| KT264784  | Unassigned | Unassigned | Unassigned | 1166_0 | Clustered           | 2 VC_1166_0   | 2   | 0.3171 | 0.93270267 | 0.2957 | 0 | 0 | 0 | 1 Ref      |
| KT264785  | Unassigned | Unassigned | Unassigned | 1165_0 | Clustered           | 10 VC_1165_0  | 10  | 0.9263 | 1          | 0.9263 | 0 | 0 | 0 | 1 Ref      |
| KT264788  | Unassigned | Unassigned | Unassigned | 1169_0 | Clustered           | 8 VC_1169_0   | 8   | 0.2897 | 1          | 0.2897 | 0 | 0 | 0 | 1 Ref      |
| KT264789  | Unassigned | Unassigned | Unassigned | 1169_0 | Clustered           | 8 VC_1169_0   | 8   | 0.2897 | 1          | 0.2897 | 0 | 0 | 0 | 1 Ref      |
| KT264790  | Unassigned | Unassigned | Unassigned | 1169_0 | Clustered           | 8 VC_1169_0   | 8   | 0.2897 | 1          | 0.2897 | 0 | 0 | 0 | 1 Ref      |
| KT264791  | Unassigned | Unassigned | Unassigned | 1170_0 | Clustered           | 19 VC_1170_0  | 19  | 0.7497 | 1          | 0.7497 | 0 | 0 | 0 | 1 Ref      |
| KT264792  | Unassigned | Unassigned | Unassigned | 1170_0 | Clustered           | 19 VC_1170_0  | 19  | 0.7497 | 1          | 0.7497 | 0 | 0 | 0 | 1 Ref      |
| KT264793  | Unassigned | Unassigned | Unassigned | 1170_0 | Clustered           | 19 VC_1170_0  | 19  | 0.7497 | 1          | 0.7497 | 0 | 0 | 0 | 1 Ref      |
| KT264794  | Unassigned | Unassigned | Unassigned | 1171_0 | Clustered/Singleton | 1 VC_1171_0   | 1   | 0      | 1          | 0      | 0 | 0 | 0 | 1 Ref      |
| KT264795  | Unassigned | Unassigned | Unassigned | 1173_0 | Clustered           | 3 VC_1173_0   | 3   | 0.0986 | 0.78721935 | 0.0776 | 0 | 0 | 0 | 1 Ref      |
| KT264796  | Unassigned | Unassigned | Unassigned | 1152_0 | Clustered           | 26 VC_1152_0  | 26  | 0.6685 | 1          | 0.6685 | 0 | 0 | 0 | 1 Ref      |
| KT264797  | Unassigned | Unassigned | Unassigned | 1152_0 | Clustered           | 26 VC_1152_0  | 26  | 0.6685 | 1          | 0.6685 | 0 | 0 | 0 | 1 Ref      |
| KT264798  | Unassigned | Unassigned | Unassigned | 1167_0 | Clustered           | 11 VC_1167_0  | 11  | 0.5637 | 1          | 0.5637 | 0 | 0 | 0 | 1 Ref      |
| KT264799  | Unassigned | Unassigned | Unassigned | 1167_0 | Clustered           | 11 VC_1167_0  | 11  | 0.5637 | 1          | 0.5637 | 0 | 0 | 0 | 1 Ref      |
| KT264800  | Unassigned | Unassigned | Unassigned | 1167_0 | Clustered           | 11 VC_1167_0  | 11  | 0.5637 | 1          | 0.5637 | 0 | 0 | 0 | 1 Ref      |
| KT264801  | Unassigned | Unassigned | Unassigned | 1167_0 | Clustered           | 11 VC_1167_0  | 11  | 0.5637 | 1          | 0.5637 | 0 | 0 | 0 | 1 Ref      |
| KT264802  | Unassigned | Unassigned | Unassigned | 1178_0 | Clustered           | 3 VC_1178_0   | 3   | 0.877  | 0.96173875 | 0.8434 | 0 | 0 | 0 | 1 Ref      |
| KT264803  | Unassigned | Unassigned | Unassigned | 1177_0 | Clustered           | 2 VC_1177_0   | 2   | 0.6063 | 0.90610936 | 0.5494 | 0 | 0 | 0 | 1 Ref      |
| KT264805  | Unassigned | Unassigned | Unassigned | 1179_0 | Clustered           | 4 VC_1179_0   | 4   | 0.9241 | 0.99468305 | 0.9191 | 0 | 0 | 0 | 1 Ref      |
| KT264806  | Unassigned | Unassigned | Unassigned | 1180_0 | Clustered           | 4 VC_1180_0   | 4   | 1      | 1          | 1      | 0 | 0 | 0 | 1 Ref      |
| KT264808  | Unassigned | Unassigned | Unassigned | 1108_0 | Clustered           | 52 VC_1108_0  | 52  | 0.7674 | 1          | 0.7674 | 0 | 0 | 0 | 1 Ref      |
| KT264809  | Unassigned | Unassigned | Unassigned | 1108_0 | Clustered           | 52 VC_1108_0  | 52  | 0.7674 | 1          | 0.7674 | 0 | 0 | 0 | 1 Ref      |
| KT264810  | Unassigned | Unassigned | Unassigned | 1108_0 | Clustered           | 52 VC_1108_0  | 52  | 0.7674 | 1          | 0.7674 | 0 | 0 | 0 | 1 Ref      |
| KT264811  | Unassigned | Unassigned | Unassigned | 1108_0 | Clustered           | 48 VC_411_0   | 48  | 0.4808 | 1          | 0.4808 | 0 | 1 | 0 | 1 Ref      |
| KT264812  | Unassigned | Unassigned | Unassigned | 1127_0 | Clustered           | 2 VC_1127_0   | 2   | 0.5888 | 0.9331928  | 0.5494 | 0 | 0 | 0 | 1 Ref      |
| KT264813  | Unassigned | Unassigned | Unassigned | 1028_0 | Clustered           | 69 VC_1028_0  | 69  | 0.8547 | 1          | 0.8547 | 0 | 0 | 0 | 1 Ref      |
| KT264814  | Unassigned | Unassigned | Unassigned | 1028_0 | Clustered           | 69 VC_1028_0  | 69  | 0.8547 | 1          | 0.8547 | 0 | 0 | 0 | 1 Ref      |
| KT264815  | Unassigned | Unassigned | Unassigned | 1028_0 | Clustered           | 69 VC_1028_0  | 69  | 0.8547 | 1          | 0.8547 | 0 | 0 | 0 | 1 Ref      |
| KT264816  | Unassigned | Unassigned | Unassigned | 1183_0 | Clustered           | 2 VC_1183_0   | 2   | 0.4211 | 0.91600907 | 0.3857 | 0 | 0 | 0 | 1 Ref      |
| KT264817  | Unassigned | Unassigned | Unassigned | 1183_0 | Clustered           | 2 VC_1183_0   | 2   | 0.4211 | 0.91600907 | 0.3857 | 0 | 0 | 0 | 1 Ref      |
| KT264818  | Unassigned | Unassigned | Unassigned | 1184_0 | Clustered           | 10 VC_1184_0  | 10  | 0.7506 | 1          | 0.7506 | 0 | 0 | 0 | 1 Ref      |
| KT264819  | Unassigned | Unassigned | Unassigned | 1184_0 | Clustered           | 10 VC_1184_0  | 10  | 0.7506 | 1          | 0.7506 | 0 | 0 | 0 | 1 Ref      |
| KT264820  | Unassigned | Unassigned | Unassigned | 1181_0 | Clustered           | 4 VC_1181_0   | 4   | 0.1325 | 0.65559538 | 0.0869 | 0 | 0 | 0 | 1 Ref      |
| KT264821  | Unassigned | Unassigned | Unassigned | 1181_0 | Clustered           | 4 VC_1181_0   | 4   | 0.1325 | 0.65559538 | 0.0869 | 0 | 0 | 0 | 1 Ref      |
| KT264822  | Unassigned | Unassigned | Unassigned | 1188_0 | Clustered           | 3 VC_1188_0   | 3   | 0.2005 | 0.95837083 | 0.1922 | 0 | 0 | 0 | 1 Ref      |
| KT264823  | Unassigned | Unassigned | Unassigned | 1189_0 | Clustered           | 16 VC_1189_0  | 16  | 0.8814 | 1          | 0.8814 | 0 | 0 | 0 | 1 Ref      |
| KT264824  | Unassigned | Unassigned | Unassigned | 1189_0 | Clustered           | 16 VC_1189_0  | 16  | 0.8814 | 1          | 0.8814 | 0 | 0 | 0 | 1 Ref      |
| KT264825  | Unassigned | Unassigned | Unassigned | 1189_0 | Clustered           | 16 VC_1189_0  | 16  | 0.8814 | 1          | 0.8814 | 0 | 0 | 0 | 1 Ref      |
| KT264826  | Unassigned | Unassigned | Unassigned | 1095_0 | Clustered           | 12 VC_1095_0  | 12  | 0.2819 | 0.99837092 | 0.2814 | 0 | 0 | 0 | 1 Ref      |
| KT264827  | Unassigned | Unassigned | Unassigned | 1095_0 | Clustered           | 12 VC_1095_0  | 12  | 0.2819 | 0.99837092 | 0.2814 | 0 | 0 | 0 | 1 Ref      |
| KT264828  | Unassigned | Unassigned | Unassigned | 1191_0 | Clustered           | 9 VC_1191_0   | 9   | 0.8537 | 1          | 0.8537 | 0 | 0 | 0 | 1 Ref      |
| KT264830  | Unassigned | Unassigned | Unassigned | 1188_0 | Clustered           | 3 VC_1188_0   | 3   | 0.2005 | 0.95837083 | 0.1922 | 0 | 0 | 0 | 1 Ref      |
| KT264831  | Unassigned | Unassigned | Unassigned | 1193_0 | Clustered           | 2 VC_1193_0   | 2   | 0.0731 | 0.80562642 | 0.0589 | 0 | 0 | 0 | 1 Ref      |
| KT264833  | Unassigned | Unassigned | Unassigned | 1161_0 | Clustered           | 16 VC_1161_0  | 16  | 0.4834 | 0.99999958 | 0.4834 | 0 | 0 | 0 | 1 Ref      |
| KT264834  | Unassigned | Unassigned | Unassigned | 1194_0 | Clustered           | 2 VC_1194_0   | 2   | 1      | 1          | 1      | 0 | 0 | 0 | 1 Ref      |
| KT270441  | Unassigned | Unassigned | Unassigned | 385_0  | Clustered           | 24 VC_385_0   | 24  | 0.5516 | 1          | 0.5516 | 0 | 0 | 0 | 1 Ref      |
| KT279576  | Unassigned | Unassigned | Unassigned | 538_60 | Clustered           | 2 VC_538_60   | 2   | 0.0091 | 0.95761233 | 0.0087 | 0 | 0 | 0 | 1 Ref      |
| KT281790  | Unassigned | Unassigned | Unassigned | 579_11 | Clustered           | 2 VC_579_11   | 2   | 0.0032 | 0.76766997 | 0.0025 | 0 | 0 | 0 | 1 Ref      |
| KT281791  | Unassigned | Unassigned | Unassigned | 918_0  | Clustered           | 16 VC_918_0   | 16  | 0.2945 | 1          | 0.2945 | 0 | 0 | 0 | 1 Ref      |
| KT281792  | Unassigned | Unassigned | Unassigned | 538_27 | Clustered           | 2 VC_538_27   | 2   | 0.0141 | 0.95761635 | 0.0135 | 0 | 0 | 0 | 1 Ref      |
| KT281793  | Unassigned | Unassigned | Unassigned | 538_13 | Clustered/Singleton | 1 VC_538_13   | 1   | 0      | 1          | 0      | 0 | 0 | 0 | 1 Ref      |
| KT281794  | Unassigned | Unassigned | Unassigned | 918_0  | Clustered           | 16 VC_918_0   | 16  | 0.2945 | 1          | 0.2945 | 0 | 0 | 0 | 1 Ref      |
| KT281795  | Unassigned | Unassigned | Unassigned | 538_31 | Clustered           | 11 VC_538_31  | 11  | 0.0894 | 1          | 0.0894 | 0 | 0 | 0 | 0.6 Ref    |
| KT281796  | Unassigned | Unassigned | Unassigned | 577_0  | Clustered           | 21 VC_577_0   | 21  | 0.9908 | 1          | 0.9908 | 0 | 0 | 0 | 1 Ref      |
| KT285706  | Unassigned | Unassigned | Unassigned | 232_0  | Clustered           | 32 VC_232_0   | 32  | 0.8471 | 1          | 0.8471 | 0 | 0 | 0 | 0.996 Ref  |
| KT287080  | Unassigned | Unassigned | Unassigned | 560_0  | Clustered           | 15 VC_560_0   | 15  | 0.2846 | 1          | 0.2846 | 0 | 0 | 0 | 1 Ref      |
| KT307976  | Unassigned | Unassigned | Unassigned | 912_1  | Clustered           | 12 VC_912_1   | 12  | 0.2423 | 1          | 0.2423 | 0 | 0 | 0 | 1 Ref      |
| KT309034  | Unassigned | Unassigned | Unassigned | 538_0  | Clustered/Singleton | 1 VC_538_0    | 1   | 0      | 1          | 0      | 0 | 0 | 0 | 1 Ref      |
| KT3212134 | Unassigned | Unassigned | Unassigned | 401_0  | Clustered           | 4 VC_401_0    | 4   | 0.0343 | 0.99998813 | 0.0343 | 0 | 0 | 0 | 1 Ref      |
| KT3212135 | Unassigned | Unassigned | Unassigned | 686_0  | Clustered           | 25 VC_686_0   | 25  | 0.5501 | 1          | 0.5501 | 0 | 0 | 0 | 0.96 Ref   |
| KT3212136 | Unassigned | Unassigned | Unassigned | 613_0  | Clustered           | 2 VC_613_0    | 2   | 0.0728 | 0.95685859 | 0.0696 | 0 | 0 | 0 | 1 Ref      |
| KT3212137 | Unassigned | Unassigned | Unassigned | 801_1  | Clustered           | 11 VC_801_1   | 11  | 0.1583 | 1          | 0.1583 | 0 | 0 | 0 | 1 Ref      |
| KT321476  | Unassigned | Unassigned | Unassigned | 579_50 | Clustered           | 15 VC_579_50  | 15  | 0.0467 | 1          | 0.0467 | 0 | 0 | 0 | 0.9238 Ref |



|          |            |            |            |        |                     |              |     |        |            |        |   |   |   |            |
|----------|------------|------------|------------|--------|---------------------|--------------|-----|--------|------------|--------|---|---|---|------------|
| KT326767 | Unassigned | Unassigned | Unassigned | 531_0  | Clustered           | 32 VC_531_0  | 32  | 0.6859 | 1          | 0.6859 | 0 | 0 | 0 | 1 Ref      |
| KT326768 | Unassigned | Unassigned | Unassigned | 335_45 | Clustered           | 4 VC_335_45  | 4   | 0.0143 | 0.99998616 | 0.0143 | 0 | 0 | 0 | 0.8333 Ref |
| KT336320 | Unassigned | Unassigned | Unassigned | 647_0  | Clustered           | 37 VC_647_0  | 37  | 0.5847 | 1          | 0.5847 | 0 | 0 | 0 | 0.9234 Ref |
| KT336321 | Unassigned | Unassigned | Unassigned | 647_0  | Clustered           | 37 VC_647_0  | 37  | 0.5847 | 1          | 0.5847 | 0 | 0 | 0 | 0.9234 Ref |
| KT337339 | Unassigned | Unassigned | Unassigned | 427_0  | Clustered           | 37 VC_427_0  | 37  | 0.5729 | 1          | 0.5729 | 0 | 0 | 0 | 0.9474 Ref |
| KT337340 | Unassigned | Unassigned | Unassigned | 427_0  | Clustered           | 37 VC_427_0  | 37  | 0.5729 | 1          | 0.5729 | 0 | 0 | 0 | 0.9474 Ref |
| KT337341 | Unassigned | Unassigned | Unassigned | 427_0  | Clustered           | 37 VC_427_0  | 37  | 0.5729 | 1          | 0.5729 | 0 | 0 | 0 | 0.9474 Ref |
| KT337342 | Unassigned | Unassigned | Unassigned | 344_0  | Clustered           | 30 VC_344_0  | 30  | 0.523  | 1          | 0.523  | 0 | 0 | 0 | 0.9954 Ref |
| KT337352 | Unassigned | Unassigned | Unassigned | 427_0  | Clustered           | 37 VC_427_0  | 37  | 0.5729 | 1          | 0.5729 | 0 | 0 | 0 | 0.9474 Ref |
| KT337354 | Unassigned | Unassigned | Unassigned | 427_0  | Clustered           | 37 VC_427_0  | 37  | 0.5729 | 1          | 0.5729 | 0 | 0 | 0 | 0.9474 Ref |
| KT337355 | Unassigned | Unassigned | Unassigned | 427_0  | Clustered           | 37 VC_427_0  | 37  | 0.5729 | 1          | 0.5729 | 0 | 0 | 0 | 0.9474 Ref |
| KT337356 | Unassigned | Unassigned | Unassigned | 427_0  | Clustered           | 37 VC_427_0  | 37  | 0.5729 | 1          | 0.5729 | 0 | 0 | 0 | 0.9474 Ref |
| KT337358 | Unassigned | Unassigned | Unassigned | 425_0  | Clustered           | 40 VC_425_0  | 40  | 0.8399 | 1          | 0.8399 | 0 | 0 | 0 | 0.9974 Ref |
| KT337359 | Unassigned | Unassigned | Unassigned | 427_0  | Clustered           | 37 VC_427_0  | 37  | 0.5729 | 1          | 0.5729 | 0 | 0 | 0 | 0.9474 Ref |
| KT337360 | Unassigned | Unassigned | Unassigned | 268_1  | Clustered           | 20 VC_268_1  | 20  | 0.1906 | 1          | 0.1906 | 0 | 0 | 0 | 0.6789 Ref |
| KT337362 | Unassigned | Unassigned | Unassigned | 427_0  | Clustered           | 37 VC_427_0  | 37  | 0.5729 | 1          | 0.5729 | 0 | 0 | 0 | 0.9474 Ref |
| KT337364 | Unassigned | Unassigned | Unassigned | 425_0  | Clustered           | 40 VC_425_0  | 40  | 0.8399 | 1          | 0.8399 | 0 | 0 | 0 | 0.9974 Ref |
| KT339321 | Unassigned | Unassigned | Unassigned | 714_0  | Clustered           | 71 VC_714_0  | 71  | 0.935  | 1          | 0.935  | 0 | 0 | 0 | 1 Ref      |
| KT344895 | Unassigned | Unassigned | Unassigned | 12_0   | Clustered           | 21 VC_12_0   | 21  | 0.2262 | 1          | 0.2262 | 0 | 0 | 0 | 0.9571 Ref |
| KT345706 | Unassigned | Unassigned | Unassigned | 1007_2 | Clustered/Singleton | 1 VC_1007_2  | 1   | 0      | 1          | 0      | 0 | 0 | 0 | 1 Ref      |
| KT347313 | Unassigned | Unassigned | Unassigned | 537_0  | Clustered           | 39 VC_537_0  | 39  | 0.8148 | 1          | 0.8148 | 0 | 0 | 0 | 1 Ref      |
| KT347314 | Unassigned | Unassigned | Unassigned | 783_0  | Clustered           | 67 VC_783_0  | 67  | 0.8945 | 1          | 0.8945 | 0 | 0 | 0 | 1 Ref      |
| KT353109 | Unassigned | Unassigned | Unassigned | 873_5  | Clustered           | 3 VC_873_5   | 3   | 0.0491 | 0.9761082  | 0.0491 | 0 | 0 | 0 | 1 Ref      |
| KT355471 | Unassigned | Unassigned | Unassigned | 985_0  | Clustered           | 38 VC_985_0  | 38  | 0.9334 | 1          | 0.9334 | 0 | 0 | 0 | 1 Ref      |
| KT355472 | Unassigned | Unassigned | Unassigned | 783_0  | Clustered           | 67 VC_783_0  | 67  | 0.8945 | 1          | 0.8945 | 0 | 0 | 0 | 1 Ref      |
| KT355473 | Unassigned | Unassigned | Unassigned | 985_0  | Clustered           | 38 VC_985_0  | 38  | 0.9334 | 1          | 0.9334 | 0 | 0 | 0 | 1 Ref      |
| KT355474 | Unassigned | Unassigned | Unassigned | 783_0  | Clustered           | 67 VC_783_0  | 67  | 0.8945 | 1          | 0.8945 | 0 | 0 | 0 | 1 Ref      |
| KT355475 | Unassigned | Unassigned | Unassigned | 985_0  | Clustered           | 38 VC_985_0  | 38  | 0.9334 | 1          | 0.9334 | 0 | 0 | 0 | 1 Ref      |
| KT359365 | Unassigned | Unassigned | Unassigned | 532_0  | Clustered           | 75 VC_532_0  | 75  | 0.9393 | 1          | 0.9393 | 0 | 0 | 0 | 1 Ref      |
| KT361649 | Unassigned | Unassigned | Unassigned | 725_0  | Clustered           | 47 VC_725_0  | 47  | 0.8649 | 1          | 0.8649 | 0 | 0 | 0 | 1 Ref      |
| KT361650 | Unassigned | Unassigned | Unassigned | 725_0  | Clustered           | 47 VC_725_0  | 47  | 0.8649 | 1          | 0.8649 | 0 | 0 | 0 | 1 Ref      |
| KT361652 | Unassigned | Unassigned | Unassigned | 725_0  | Clustered           | 47 VC_725_0  | 47  | 0.8649 | 1          | 0.8649 | 0 | 0 | 0 | 1 Ref      |
| KT361654 | Unassigned | Unassigned | Unassigned | 637_0  | Clustered           | 27 VC_637_0  | 27  | 0.8807 | 1          | 0.8807 | 0 | 0 | 0 | 1 Ref      |
| KT361655 | Unassigned | Unassigned | Unassigned | 637_0  | Clustered           | 27 VC_637_0  | 27  | 0.8807 | 1          | 0.8807 | 0 | 0 | 0 | 1 Ref      |
| KT361656 | Unassigned | Unassigned | Unassigned | 637_0  | Clustered           | 27 VC_637_0  | 27  | 0.8807 | 1          | 0.8807 | 0 | 0 | 0 | 1 Ref      |
| KT361657 | Unassigned | Unassigned | Unassigned | 637_0  | Clustered           | 27 VC_637_0  | 27  | 0.8807 | 1          | 0.8807 | 0 | 0 | 0 | 1 Ref      |
| KT361920 | Unassigned | Unassigned | Unassigned | 241_0  | Clustered           | 21 VC_241_0  | 21  | 0.8342 | 1          | 0.8342 | 0 | 0 | 0 | 1 Ref      |
| KT363731 | Unassigned | Unassigned | Unassigned | 335_37 | Clustered           | 4 VC_335_37  | 4   | 0.0112 | 0.99980442 | 0.0112 | 0 | 0 | 0 | 0.6667 Ref |
| KT363872 | Unassigned | Unassigned | Unassigned | 341_0  | Clustered           | 27 VC_341_0  | 27  | 0.5058 | 1          | 0.5058 | 0 | 0 | 0 | 0.8661 Ref |
| KT364588 | Unassigned | Unassigned | Unassigned | 384_4  | Clustered           | 5 VC_384_4   | 5   | 0.0134 | 0.99999971 | 0.0134 | 0 | 0 | 0 | 1 Ref      |
| KT365397 | Unassigned | Unassigned | Unassigned | 535_1  | Clustered           | 108 VC_535_1 | 108 | 0.8479 | 1          | 0.8479 | 0 | 1 | 0 | 0.9955 Ref |
| KT365398 | Unassigned | Unassigned | Unassigned | 579_6  | Clustered           | 2 VC_579_6   | 2   | 0.0032 | 0.72299343 | 0.0023 | 0 | 0 | 0 | 1 Ref      |
| KT365399 | Unassigned | Unassigned | Unassigned | 783_0  | Clustered           | 67 VC_783_0  | 67  | 0.8945 | 1          | 0.8945 | 0 | 0 | 0 | 1 Ref      |
| KT365400 | Unassigned | Unassigned | Unassigned | 579_37 | Clustered/Singleton | 1 VC_579_37  | 1   | 0      | 1          | 0      | 0 | 0 | 0 | 1 Ref      |
| KT365401 | Unassigned | Unassigned | Unassigned | 1116_0 | Clustered           | 24 VC_1116_0 | 24  | 0.8376 | 1          | 0.8376 | 0 | 0 | 0 | 1 Ref      |
| KT365402 | Unassigned | Unassigned | Unassigned | 526_0  | Clustered           | 32 VC_526_0  | 32  | 0.9037 | 1          | 0.9037 | 0 | 0 | 0 | 1 Ref      |
| KT367885 | Unassigned | Unassigned | Unassigned | 848_0  | Clustered           | 124 VC_848_0 | 124 | 0.9484 | 1          | 0.9484 | 0 | 0 | 0 | 1 Ref      |
| KT367886 | Unassigned | Unassigned | Unassigned | 113_0  | Clustered           | 91 VC_113_0  | 91  | 0.9584 | 1          | 0.9584 | 0 | 0 | 0 | 1 Ref      |
| KT367887 | Unassigned | Unassigned | Unassigned | 860_0  | Clustered           | 9 VC_860_0   | 9   | 0.7723 | 1          | 0.7723 | 0 | 0 | 0 | 1 Ref      |
| KT372002 | Unassigned | Unassigned | Unassigned | 991_0  | Clustered           | 39 VC_991_0  | 39  | 1      | 1          | 1      | 0 | 0 | 0 | 1 Ref      |
| KT372003 | Unassigned | Unassigned | Unassigned | 918_0  | Clustered           | 16 VC_918_0  | 16  | 0.2945 | 1          | 0.2945 | 0 | 0 | 0 | 1 Ref      |
| KT372690 | Unassigned | Unassigned | Unassigned | 81_0   | Clustered           | 41 VC_81_0   | 41  | 0.5815 | 1          | 0.5815 | 0 | 0 | 0 | 0.9805 Ref |
| KT372691 | Unassigned | Unassigned | Unassigned | 81_0   | Clustered           | 41 VC_81_0   | 41  | 0.5815 | 1          | 0.5815 | 0 | 0 | 0 | 0.9805 Ref |
| KT372692 | Unassigned | Unassigned | Unassigned | 81_0   | Clustered           | 41 VC_81_0   | 41  | 0.5815 | 1          | 0.5815 | 0 | 0 | 0 | 0.9805 Ref |
| KT372693 | Unassigned | Unassigned | Unassigned | 81_0   | Clustered           | 41 VC_81_0   | 41  | 0.5815 | 1          | 0.5815 | 0 | 0 | 0 | 0.9805 Ref |
| KT372694 | Unassigned | Unassigned | Unassigned | 81_0   | Clustered           | 41 VC_81_0   | 41  | 0.5815 | 1          | 0.5815 | 0 | 0 | 0 | 0.9805 Ref |
| KT372695 | Unassigned | Unassigned | Unassigned | 81_0   | Clustered           | 41 VC_81_0   | 41  | 0.5815 | 1          | 0.5815 | 0 | 0 | 0 | 0.9805 Ref |
| KT372696 | Unassigned | Unassigned | Unassigned | 81_0   | Clustered           | 41 VC_81_0   | 41  | 0.5815 | 1          | 0.5815 | 0 | 0 | 0 | 0.9805 Ref |
| KT372697 | Unassigned | Unassigned | Unassigned | 81_0   | Clustered           | 41 VC_81_0   | 41  | 0.5815 | 1          | 0.5815 | 0 | 0 | 0 | 0.9805 Ref |
| KT372698 | Unassigned | Unassigned | Unassigned | 81_0   | Clustered           | 41 VC_81_0   | 41  | 0.5815 | 1          | 0.5815 | 0 | 0 | 0 | 0.9805 Ref |
| KT372714 | Unassigned | Unassigned | Unassigned | 20_0   | Clustered           | 5 VC_20_0    | 5   | 0.4268 | 0.99999994 | 0.4268 | 0 | 0 | 0 | 1 Ref      |
| KT373978 | Unassigned | Unassigned | Unassigned | 571_7  | Clustered           | 28 VC_571_7  | 28  | 0.1651 | 1          | 0.1651 | 0 | 0 | 0 | 0.8519 Ref |
| KT375356 | Unassigned | Unassigned | Unassigned | 991_0  | Clustered           | 39 VC_991_0  | 39  | 1      | 1          | 1      | 0 | 0 | 0 | 1 Ref      |
| KT381276 | Unassigned | Unassigned | Unassigned | 222_2  | Clustered           | 5 VC_222_2   | 5   | 0.0569 | 0.99999997 | 0.0569 | 0 | 0 | 0 | 1 Ref      |
| KT381277 | Unassigned | Unassigned | Unassigned | 532_0  | Clustered           | 75 VC_532_0  | 75  | 0.9393 | 1          | 0.9393 | 0 | 0 | 0 | 1 Ref      |
| KT381864 | Unassigned | Unassigned | Unassigned | 188_0  | Clustered           | 5 VC_188_0   | 5   | 0.6188 | 0.99999978 | 0.6188 | 0 | 0 | 0 | 1 Ref      |
| KT381865 | Unassigned | Unassigned | Unassigned | 188_0  | Clustered           | 5 VC_188_0   | 5   | 0.6188 | 0.99999978 | 0.6188 | 0 | 0 | 0 | 1 Ref      |
| KT381879 | Unassigned | Unassigned | Unassigned | 71_0   | Clustered           | 27 VC_71_0   | 27  | 0.5964 | 1          | 0.5964 | 0 | 0 | 0 | 0.9943 Ref |
| KT381880 | Unassigned | Unassigned | Unassigned | 687_0  | Clustered           | 21 VC_687_0  | 21  | 0.3608 | 1          | 0.3608 | 0 | 0 | 0 | 1 Ref      |
| KT388014 | Unassigned | Unassigned | Unassigned | 335_56 | Clustered           | 7 VC_335_56  | 7   | 0.0242 | 1          | 0.0242 | 0 | 0 | 0 | 0.9048 Ref |
| KT388093 | Unassigned | Unassigned | Unassigned | 425_0  | Clustered           | 40 VC_425_0  | 40  | 0.8399 | 1          | 0.8399 | 0 | 0 | 0 | 0.9974 Ref |
| KT388102 | Unassigned | Unassigned | Unassigned | 714_0  | Clustered           | 71 VC_714_0  | 71  | 0.935  | 1          | 0.935  | 0 | 0 | 0 | 1 Ref      |
| KT388103 | Unassigned | Unassigned | Unassigned | 714_0  | Clustered           | 71 VC_714_0  | 71  | 0.935  | 1          | 0.935  | 0 | 0 | 0 | 1 Ref      |
| KT429160 | Unassigned | Unassigned | Unassigned | 220_0  | Clustered           | 2 VC_220_0   | 2   | 0.491  | 0.9528045  | 0.4678 | 0 | 0 | 0 | 1 Ref      |
| KT438500 | Unassigned | Unassigned | Unassigned | 335_9  | Clustered           | 2 VC_335_9   | 2   | 0.0055 | 0.95750934 | 0.0053 | 0 | 0 | 0 | 1 Ref      |
| KT438501 | Unassigned | Unassigned | Unassigned | 974_0  | Clustered           | 34 VC_974_0  | 34  | 0.7953 | 1          | 0.7953 | 0 | 0 | 0 | 1 Ref      |
| KT454805 | Unassigned | Unassigned | Unassigned | 341_0  | Clustered           | 27 VC_341_0  | 27  | 0.5058 | 1          | 0.5058 | 0 | 0 | 0 | 0.8661 Ref |
| KT454806 | Unassigned | Unassigned | Unassigned | 341_0  | Clustered           | 27 VC_341_0  | 27  | 0.5058 | 1          | 0.5058 | 0 | 0 | 0 | 0.8661 Ref |
| KT454972 | Unassigned | Unassigned | Unassigned | 834_0  | Clustered           | 18 VC_834_0  | 18  | 0.9116 | 1          | 0.9116 | 0 | 0 | 0 | 1 Ref      |
| KT588073 | Unassigned | Unassigned | Unassigned | 441_1  | Clustered           | 8 VC_441_1   | 8   | 0.5443 | 1          | 0.5443 | 0 | 0 | 0 | 0.9643 Ref |
| KT588074 | Unassigned | Unassigned | Unassigned | 249_0  | Clustered           | 2 VC_249_0   | 2   | 0.0834 | 0.95416588 | 0.0795 | 0 | 0 | 0 | 1 Ref      |



|          |            |            |            |        |                     |              |     |        |            |        |   |   |   |            |
|----------|------------|------------|------------|--------|---------------------|--------------|-----|--------|------------|--------|---|---|---|------------|
| KT588075 | Unassigned | Unassigned | Unassigned | 441_0  | Clustered           | 2 VC_441_0   | 2   | 0.1619 | 0.94573679 | 0.1531 | 0 | 0 | 0 | 1 Ref      |
| KT588442 | Unassigned | Unassigned | Unassigned | 223_6  | Clustered           | 42 VC_223_6  | 42  | 0.4717 | 1          | 0.4717 | 0 | 0 | 0 | 0.8351 Ref |
| KT591076 | Unassigned | Unassigned | Unassigned | 588_0  | Clustered           | 8 VC_588_0   | 8   | 0.5695 | 1          | 0.5695 | 0 | 0 | 0 | 1 Ref      |
| KT591489 | Unassigned | Unassigned | Unassigned | 917_0  | Clustered           | 28 VC_917_0  | 28  | 0.5465 | 1          | 0.5465 | 0 | 0 | 0 | 1 Ref      |
| KT591491 | Unassigned | Unassigned | Unassigned | 785_1  | Clustered           | 9 VC_785_1   | 9   | 0.3679 | 1          | 0.3679 | 0 | 0 | 0 | 1 Ref      |
| KT599441 | Unassigned | Unassigned | Unassigned | 384_15 | Clustered           | 44 VC_384_15 | 44  | 0.139  | 1          | 0.139  | 0 | 0 | 0 | 0.7474 Ref |
| KT624200 | Unassigned | Unassigned | Unassigned | 90_0   | Clustered/Singleton | 1 VC_90_0    | 1   | 0      | 1          | 0      | 0 | 0 | 0 | 1 Ref      |
| KT626047 | Unassigned | Unassigned | Unassigned | 335_5  | Clustered           | 11 VC_335_5  | 11  | 0.0469 | 1          | 0.0469 | 0 | 0 | 0 | 0.7636 Ref |
| KT626446 | Unassigned | Unassigned | Unassigned | 144_0  | Clustered           | 2 VC_144_0   | 2   | 0.1118 | 0.95020171 | 0.1062 | 0 | 0 | 0 | 1 Ref      |
| KT630644 | Unassigned | Unassigned | Unassigned | 235_0  | Clustered           | 60 VC_235_0  | 60  | 0.9413 | 1          | 0.9413 | 0 | 0 | 0 | 1 Ref      |
| KT630647 | Unassigned | Unassigned | Unassigned | 6_0    | Clustered           | 44 VC_6_0    | 44  | 0.9068 | 1          | 0.9068 | 0 | 0 | 0 | 1 Ref      |
| KT630649 | Unassigned | Unassigned | Unassigned | 249_1  | Clustered           | 21 VC_249_1  | 21  | 0.6775 | 1          | 0.6775 | 0 | 0 | 0 | 0.8476 Ref |
| KT716493 | Unassigned | Unassigned | Unassigned | 535_1  | Clustered           | 108 VC_535_1 | 108 | 0.8479 | 1          | 0.8479 | 0 | 0 | 0 | 0.9955 Ref |
| KT717083 | Unassigned | Unassigned | Unassigned | 258_0  | Clustered           | 121 VC_258_0 | 121 | 0.7359 | 1          | 0.7359 | 0 | 0 | 0 | 0.9999 Ref |
| KT717084 | Unassigned | Unassigned | Unassigned | 258_0  | Clustered           | 121 VC_258_0 | 121 | 0.7359 | 1          | 0.7359 | 0 | 0 | 0 | 0.9999 Ref |
| KT717085 | Unassigned | Unassigned | Unassigned | 258_0  | Clustered           | 121 VC_258_0 | 121 | 0.7359 | 1          | 0.7359 | 0 | 0 | 0 | 0.9999 Ref |
| KT725776 | Unassigned | Unassigned | Unassigned | 673_0  | Clustered           | 4 VC_673_0   | 4   | 0.2891 | 0.99998263 | 0.2891 | 0 | 0 | 0 | 1 Ref      |
| KT728930 | Unassigned | Unassigned | Unassigned | 904_0  | Clustered           | 10 VC_904_0  | 10  | 0.9878 | 0.99948433 | 0.9873 | 0 | 0 | 0 | 1 Ref      |
| KT728931 | Unassigned | Unassigned | Unassigned | 904_0  | Clustered           | 10 VC_904_0  | 10  | 0.9878 | 0.99948433 | 0.9873 | 0 | 0 | 0 | 1 Ref      |
| KT734862 | Unassigned | Unassigned | Unassigned | 172_0  | Clustered           | 26 VC_172_0  | 26  | 0.7909 | 1          | 0.7909 | 0 | 0 | 0 | 1 Ref      |
| KT736033 | Unassigned | Unassigned | Unassigned | 77_0   | Clustered           | 37 VC_77_0   | 37  | 0.9392 | 1          | 0.9392 | 0 | 0 | 0 | 1 Ref      |
| KT755656 | Unassigned | Unassigned | Unassigned | 1197_0 | Clustered           | 8 VC_1197_0  | 8   | 0.8167 | 1          | 0.8167 | 0 | 0 | 0 | 1 Ref      |
| KT780304 | Unassigned | Unassigned | Unassigned | 844_0  | Clustered           | 3 VC_844_0   | 3   | 0.0967 | 0.99840149 | 0.0966 | 0 | 0 | 0 | 1 Ref      |
| KT783672 | Unassigned | Unassigned | Unassigned | 985_0  | Clustered           | 38 VC_985_0  | 38  | 0.9334 | 1          | 0.9334 | 0 | 0 | 0 | 1 Ref      |
| KT804908 | Unassigned | Unassigned | Unassigned | 714_0  | Clustered           | 71 VC_714_0  | 71  | 0.935  | 1          | 0.935  | 0 | 0 | 0 | 1 Ref      |
| KT804923 | Unassigned | Unassigned | Unassigned | 77_0   | Clustered           | 37 VC_77_0   | 37  | 0.9392 | 1          | 0.9392 | 0 | 0 | 0 | 1 Ref      |
| KT809302 | Unassigned | Unassigned | Unassigned | 684_0  | Clustered           | 4 VC_684_0   | 4   | 1      | 1          | 1      | 0 | 0 | 0 | 1 Ref      |
| KT809368 | Unassigned | Unassigned | Unassigned | 10_0   | Clustered           | 25 VC_10_0   | 25  | 0.3437 | 1          | 0.3437 | 0 | 0 | 0 | 0.9733 Ref |
| KT809369 | Unassigned | Unassigned | Unassigned | 10_0   | Clustered           | 25 VC_10_0   | 25  | 0.3437 | 1          | 0.3437 | 0 | 0 | 0 | 0.9733 Ref |
| KT818595 | Unassigned | Unassigned | Unassigned | 335_14 | Clustered           | 3 VC_335_14  | 3   | 0.0094 | 0.9985917  | 0.0094 | 0 | 0 | 0 | 1 Ref      |
| KT825490 | Unassigned | Unassigned | Unassigned | 469_0  | Clustered           | 18 VC_469_0  | 18  | 0.4583 | 1          | 0.4583 | 0 | 0 | 0 | 1 Ref      |
| KT852578 | Unassigned | Unassigned | Unassigned | 20_0   | Clustered           | 5 VC_20_0    | 5   | 0.4268 | 0.9999994  | 0.4268 | 0 | 0 | 0 | 1 Ref      |
| KT870145 | Unassigned | Unassigned | Unassigned | 1012_0 | Clustered           | 2 VC_1012_0  | 2   | 0.0796 | 0.93920319 | 0.0747 | 0 | 0 | 0 | 1 Ref      |
| KT876724 | Unassigned | Unassigned | Unassigned | 1198_0 | Clustered           | 24 VC_1198_0 | 24  | 1      | 1          | 1      | 0 | 0 | 0 | 1 Ref      |
| KT876725 | Unassigned | Unassigned | Unassigned | 1080_0 | Clustered           | 23 VC_1080_0 | 23  | 0.9603 | 1          | 0.9603 | 0 | 0 | 0 | 1 Ref      |
| KT876726 | Unassigned | Unassigned | Unassigned | 1198_0 | Clustered           | 24 VC_1198_0 | 24  | 1      | 1          | 1      | 0 | 0 | 0 | 1 Ref      |
| KT878766 | Unassigned | Unassigned | Unassigned | 10_0   | Clustered           | 25 VC_10_0   | 25  | 0.3437 | 1          | 0.3437 | 0 | 0 | 0 | 0.9733 Ref |
| KT880194 | Unassigned | Unassigned | Unassigned | 526_0  | Clustered           | 32 VC_526_0  | 32  | 0.9037 | 1          | 0.9037 | 0 | 0 | 0 | 1 Ref      |
| KT881477 | Unassigned | Unassigned | Unassigned | 654_0  | Clustered           | 115 VC_654_0 | 115 | 0.7303 | 1          | 0.7303 | 0 | 0 | 0 | 0.8764 Ref |
| KT887557 | Unassigned | Unassigned | Unassigned | 182_1  | Clustered           | 2 VC_182_1   | 2   | 0.0361 | 0.95657568 | 0.0345 | 0 | 0 | 0 | 1 Ref      |
| KT887558 | Unassigned | Unassigned | Unassigned | 179_0  | Clustered           | 2 VC_179_0   | 2   | 0.0795 | 0.95489091 | 0.0759 | 0 | 0 | 0 | 1 Ref      |
| KT887559 | Unassigned | Unassigned | Unassigned | 5_0    | Clustered           | 27 VC_5_0    | 27  | 0.9599 | 1          | 0.9599 | 0 | 0 | 0 | 1 Ref      |
| KT895280 | Unassigned | Unassigned | Unassigned | 538_85 | Clustered           | 2 VC_538_85  | 2   | 0.0146 | 0.95762405 | 0.014  | 0 | 0 | 0 | 1 Ref      |
| KT895281 | Unassigned | Unassigned | Unassigned | 538_45 | Clustered           | 7 VC_538_45  | 7   | 0.0632 | 1          | 0.0632 | 0 | 0 | 0 | 0.8095 Ref |
| KT895374 | Unassigned | Unassigned | Unassigned | 462_1  | Clustered/Singleton | 1 VC_462_1   | 1   | 0      | 1          | 0      | 0 | 0 | 0 | 1 Ref      |
| KT919972 | Unassigned | Unassigned | Unassigned | 549_0  | Clustered           | 9 VC_549_0   | 9   | 0.2597 | 1          | 0.2597 | 0 | 0 | 0 | 1 Ref      |
| KT919973 | Unassigned | Unassigned | Unassigned | 549_0  | Clustered           | 9 VC_549_0   | 9   | 0.2597 | 1          | 0.2597 | 0 | 0 | 0 | 1 Ref      |
| KT932418 | Unassigned | Unassigned | Unassigned | 511_0  | Clustered/Singleton | 1 VC_511_0   | 1   | 0      | 1          | 0      | 0 | 0 | 0 | 1 Ref      |
| KT932699 | Unassigned | Unassigned | Unassigned | 110_0  | Clustered           | 33 VC_110_0  | 33  | 0.9488 | 1          | 0.9488 | 0 | 0 | 0 | 1 Ref      |
| KT932700 | Unassigned | Unassigned | Unassigned | 1003_0 | Clustered           | 16 VC_1003_0 | 16  | 0.8967 | 1          | 0.8967 | 0 | 0 | 0 | 1 Ref      |
| KT932701 | Unassigned | Unassigned | Unassigned | 711_0  | Clustered           | 48 VC_711_0  | 48  | 0.8217 | 1          | 0.8217 | 0 | 0 | 0 | 1 Ref      |
| KT934381 | Unassigned | Unassigned | Unassigned | 787_0  | Clustered           | 132 VC_787_0 | 132 | 1      | 1          | 1      | 0 | 0 | 0 | 1 Ref      |
| KT934943 | Unassigned | Unassigned | Unassigned | 601_3  | Clustered           | 12 VC_601_3  | 12  | 0.2339 | 1          | 0.2339 | 0 | 0 | 0 | 0.8636 Ref |
| KT945994 | Unassigned | Unassigned | Unassigned | 273_0  | Clustered           | 2 VC_273_0   | 2   | 0.1017 | 0.95560536 | 0.0972 | 0 | 0 | 0 | 1 Ref      |
| KT945995 | Unassigned | Unassigned | Unassigned | 1004_0 | Clustered           | 4 VC_1004_0  | 4   | 0.2949 | 0.99997642 | 0.2949 | 0 | 0 | 0 | 1 Ref      |
| KT949345 | Unassigned | Unassigned | Unassigned | 907_0  | Clustered           | 32 VC_907_0  | 32  | 0.9964 | 1          | 0.9964 | 0 | 0 | 0 | 1 Ref      |
| KT959213 | Unassigned | Unassigned | Unassigned | 991_0  | Clustered           | 39 VC_991_0  | 39  | 1      | 1          | 1      | 0 | 0 | 0 | 1 Ref      |
| KT962245 | Unassigned | Unassigned | Unassigned | 1053_0 | Clustered           | 5 VC_1053_0  | 5   | 0.9327 | 0.9999997  | 0.9327 | 0 | 0 | 0 | 1 Ref      |
| KT962246 | Unassigned | Unassigned | Unassigned | 1053_0 | Clustered           | 5 VC_1053_0  | 5   | 0.9327 | 0.9999997  | 0.9327 | 0 | 0 | 0 | 1 Ref      |
| KT962247 | Unassigned | Unassigned | Unassigned | 1053_0 | Clustered           | 5 VC_1053_0  | 5   | 0.9327 | 0.9999997  | 0.9327 | 0 | 0 | 0 | 1 Ref      |
| KT962832 | Unassigned | Unassigned | Unassigned | 654_0  | Clustered           | 115 VC_654_0 | 115 | 0.7303 | 1          | 0.7303 | 0 | 0 | 0 | 0.8764 Ref |
| KT964103 | Unassigned | Unassigned | Unassigned | 113_0  | Clustered           | 91 VC_113_0  | 91  | 0.9584 | 1          | 0.9584 | 0 | 0 | 0 | 1 Ref      |
| KT968831 | Unassigned | Unassigned | Unassigned | 182_3  | Clustered/Singleton | 1 VC_182_3   | 1   | 0      | 1          | 0      | 0 | 0 | 0 | 1 Ref      |
| KT968832 | Unassigned | Unassigned | Unassigned | 185_0  | Clustered           | 53 VC_185_0  | 53  | 0.9153 | 1          | 0.9153 | 0 | 0 | 0 | 1 Ref      |
| KT989433 | Unassigned | Unassigned | Unassigned | 891_0  | Clustered           | 11 VC_891_0  | 11  | 0.9663 | 1          | 0.9663 | 0 | 0 | 0 | 1 Ref      |
| KT990215 | Unassigned | Unassigned | Unassigned | 465_0  | Clustered           | 80 VC_465_0  | 80  | 0.9988 | 1          | 0.9988 | 0 | 0 | 0 | 1 Ref      |
| KT990218 | Unassigned | Unassigned | Unassigned | 991_0  | Clustered           | 39 VC_991_0  | 39  | 1      | 1          | 1      | 0 | 0 | 0 | 1 Ref      |
| KT995480 | Unassigned | Unassigned | Unassigned | 195_3  | Clustered           | 9 VC_195_3   | 9   | 0.1955 | 1          | 0.1955 | 0 | 0 | 0 | 0.8611 Ref |
| KT997847 | Unassigned | Unassigned | Unassigned | 497_0  | Clustered           | 4 VC_497_0   | 4   | 0.0962 | 0.999525   | 0.0961 | 0 | 0 | 0 | 1 Ref      |
| KU052037 | Unassigned | Unassigned | Unassigned | 40_0   | Clustered           | 6 VC_40_0    | 6   | 0.5677 | 1          | 0.5677 | 0 | 0 | 0 | 0.8667 Ref |
| KU052488 | Unassigned | Unassigned | Unassigned | 650_0  | Clustered           | 3 VC_650_0   | 3   | 0.2008 | 0.99838296 | 0.2005 | 0 | 0 | 0 | 1 Ref      |
| KU055616 | Unassigned | Unassigned | Unassigned | 535_1  | Clustered           | 108 VC_535_1 | 108 | 0.8479 | 1          | 0.8479 | 0 | 0 | 0 | 0.9955 Ref |
| KU057941 | Unassigned | Unassigned | Unassigned | 749_0  | Clustered           | 5 VC_749_0   | 5   | 0.4704 | 0.99999995 | 0.4704 | 0 | 0 | 0 | 1 Ref      |
| KU064779 | Unassigned | Unassigned | Unassigned | 131_0  | Clustered           | 43 VC_131_0  | 43  | 0.8853 | 1          | 0.8853 | 0 | 0 | 0 | 1 Ref      |
| KU130126 | Unassigned | Unassigned | Unassigned | 79_1   | Clustered           | 6 VC_79_1    | 6   | 0.1348 | 1          | 0.1348 | 0 | 0 | 0 | 1 Ref      |
| KU130127 | Unassigned | Unassigned | Unassigned | 79_1   | Clustered           | 6 VC_79_1    | 6   | 0.1348 | 1          | 0.1348 | 0 | 0 | 0 | 1 Ref      |
| KU130128 | Unassigned | Unassigned | Unassigned | 79_1   | Clustered           | 6 VC_79_1    | 6   | 0.1348 | 1          | 0.1348 | 0 | 0 | 0 | 1 Ref      |
| KU130129 | Unassigned | Unassigned | Unassigned | 79_1   | Clustered           | 6 VC_79_1    | 6   | 0.1348 | 1          | 0.1348 | 0 | 0 | 0 | 1 Ref      |
| KU130130 | Unassigned | Unassigned | Unassigned | 79_1   | Clustered           | 6 VC_79_1    | 6   | 0.1348 | 1          | 0.1348 | 0 | 0 | 0 | 1 Ref      |
| KU130131 | Unassigned | Unassigned | Unassigned | 79_1   | Clustered           | 6 VC_79_1    | 6   | 0.1348 | 1          | 0.1348 | 0 | 0 | 0 | 1 Ref      |
| KU160638 | Unassigned | Unassigned | Unassigned | 882_0  | Clustered           | 11 VC_882_0  | 11  | 0.943  | 1          | 0.943  | 0 | 0 | 0 | 1 Ref      |



|          |            |            |            |        |                     |              |     |        |            |        |   |   |   |            |
|----------|------------|------------|------------|--------|---------------------|--------------|-----|--------|------------|--------|---|---|---|------------|
| KU160639 | Unassigned | Unassigned | Unassigned | 882_0  | Clustered           | 11 VC_882_0  | 11  | 0.943  | 1          | 0.943  | 0 | 0 | 0 | 1 Ref      |
| KU160640 | Unassigned | Unassigned | Unassigned | 1200_0 | Clustered           | 73 VC_1200_0 | 73  | 0.9825 | 1          | 0.9825 | 0 | 0 | 0 | 1 Ref      |
| KU160641 | Unassigned | Unassigned | Unassigned | 1204_0 | Clustered           | 25 VC_1204_0 | 25  | 0.7382 | 1          | 0.7382 | 0 | 0 | 0 | 1 Ref      |
| KU160642 | Unassigned | Unassigned | Unassigned | 825_0  | Clustered           | 17 VC_825_0  | 17  | 0.8364 | 1          | 0.8364 | 0 | 0 | 0 | 1 Ref      |
| KU160643 | Unassigned | Unassigned | Unassigned | 1200_0 | Clustered           | 73 VC_1200_0 | 73  | 0.9825 | 1          | 0.9825 | 0 | 0 | 0 | 1 Ref      |
| KU160644 | Unassigned | Unassigned | Unassigned | 1207_0 | Clustered           | 20 VC_1207_0 | 20  | 0.9898 | 1          | 0.9898 | 0 | 0 | 0 | 1 Ref      |
| KU160645 | Unassigned | Unassigned | Unassigned | 1200_0 | Clustered           | 73 VC_1200_0 | 73  | 0.9825 | 1          | 0.9825 | 0 | 0 | 0 | 1 Ref      |
| KU160646 | Unassigned | Unassigned | Unassigned | 1204_0 | Clustered           | 25 VC_1204_0 | 25  | 0.7382 | 1          | 0.7382 | 0 | 0 | 0 | 1 Ref      |
| KU160647 | Unassigned | Unassigned | Unassigned | 882_0  | Clustered           | 11 VC_882_0  | 11  | 0.943  | 1          | 0.943  | 0 | 0 | 0 | 1 Ref      |
| KU160648 | Unassigned | Unassigned | Unassigned | 1200_0 | Clustered           | 73 VC_1200_0 | 73  | 0.9825 | 1          | 0.9825 | 0 | 0 | 0 | 1 Ref      |
| KU160649 | Unassigned | Unassigned | Unassigned | 1200_0 | Clustered           | 73 VC_1200_0 | 73  | 0.9825 | 1          | 0.9825 | 0 | 0 | 0 | 1 Ref      |
| KU160650 | Unassigned | Unassigned | Unassigned | 1208_0 | Clustered           | 6 VC_1208_0  | 6   | 0.8634 | 0.99999946 | 0.8634 | 0 | 0 | 0 | 1 Ref      |
| KU160651 | Unassigned | Unassigned | Unassigned | 1116_0 | Clustered           | 24 VC_1116_0 | 24  | 0.8376 | 1          | 0.8376 | 0 | 0 | 0 | 1 Ref      |
| KU160652 | Unassigned | Unassigned | Unassigned | 1200_0 | Clustered           | 73 VC_1200_0 | 73  | 0.9825 | 1          | 0.9825 | 0 | 0 | 0 | 1 Ref      |
| KU160653 | Unassigned | Unassigned | Unassigned | 1200_0 | Clustered           | 73 VC_1200_0 | 73  | 0.9825 | 1          | 0.9825 | 0 | 0 | 0 | 1 Ref      |
| KU160654 | Unassigned | Unassigned | Unassigned | 1210_0 | Clustered           | 7 VC_1210_0  | 7   | 0.9808 | 0.99995963 | 0.9807 | 0 | 0 | 0 | 1 Ref      |
| KU160655 | Unassigned | Unassigned | Unassigned | 985_0  | Clustered           | 38 VC_985_0  | 38  | 0.9334 | 1          | 0.9334 | 0 | 0 | 0 | 1 Ref      |
| KU160656 | Unassigned | Unassigned | Unassigned | 1116_0 | Clustered           | 24 VC_1116_0 | 24  | 0.8376 | 1          | 0.8376 | 0 | 0 | 0 | 1 Ref      |
| KU160657 | Unassigned | Unassigned | Unassigned | 985_0  | Clustered           | 38 VC_985_0  | 38  | 0.9334 | 1          | 0.9334 | 0 | 0 | 0 | 1 Ref      |
| KU160658 | Unassigned | Unassigned | Unassigned | 985_0  | Clustered           | 38 VC_985_0  | 38  | 0.9334 | 1          | 0.9334 | 0 | 0 | 0 | 1 Ref      |
| KU160659 | Unassigned | Unassigned | Unassigned | 1200_0 | Clustered           | 73 VC_1200_0 | 73  | 0.9825 | 1          | 0.9825 | 0 | 0 | 0 | 1 Ref      |
| KU160660 | Unassigned | Unassigned | Unassigned | 1117_0 | Clustered           | 19 VC_1117_0 | 19  | 0.9177 | 1          | 0.9177 | 0 | 0 | 0 | 1 Ref      |
| KU160661 | Unassigned | Unassigned | Unassigned | 1200_0 | Clustered           | 73 VC_1200_0 | 73  | 0.9825 | 1          | 0.9825 | 0 | 0 | 0 | 1 Ref      |
| KU160662 | Unassigned | Unassigned | Unassigned | 1200_0 | Clustered           | 73 VC_1200_0 | 73  | 0.9825 | 1          | 0.9825 | 0 | 0 | 0 | 1 Ref      |
| KU160663 | Unassigned | Unassigned | Unassigned | 882_0  | Clustered           | 11 VC_882_0  | 11  | 0.943  | 1          | 0.943  | 0 | 0 | 0 | 1 Ref      |
| KU160664 | Unassigned | Unassigned | Unassigned | 1210_0 | Clustered           | 7 VC_1210_0  | 7   | 0.9808 | 0.99995963 | 0.9807 | 0 | 0 | 0 | 1 Ref      |
| KU160665 | Unassigned | Unassigned | Unassigned | 1116_0 | Clustered           | 24 VC_1116_0 | 24  | 0.8376 | 1          | 0.8376 | 0 | 0 | 0 | 1 Ref      |
| KU160666 | Unassigned | Unassigned | Unassigned | 882_0  | Clustered           | 11 VC_882_0  | 11  | 0.943  | 1          | 0.943  | 0 | 0 | 0 | 1 Ref      |
| KU160667 | Unassigned | Unassigned | Unassigned | 985_0  | Clustered           | 38 VC_985_0  | 38  | 0.9334 | 1          | 0.9334 | 0 | 0 | 0 | 1 Ref      |
| KU160668 | Unassigned | Unassigned | Unassigned | 1116_0 | Clustered           | 24 VC_1116_0 | 24  | 0.8376 | 1          | 0.8376 | 0 | 0 | 0 | 1 Ref      |
| KU160669 | Unassigned | Unassigned | Unassigned | 1211_1 | Clustered           | 3 VC_1211_1  | 3   | 0.3052 | 0.99836447 | 0.3047 | 0 | 0 | 0 | 1 Ref      |
| KU160670 | Unassigned | Unassigned | Unassigned | 985_0  | Clustered           | 38 VC_985_0  | 38  | 0.9334 | 1          | 0.9334 | 0 | 0 | 0 | 1 Ref      |
| KU160671 | Unassigned | Unassigned | Unassigned | 1200_0 | Clustered           | 73 VC_1200_0 | 73  | 0.9825 | 1          | 0.9825 | 0 | 0 | 0 | 1 Ref      |
| KU160672 | Unassigned | Unassigned | Unassigned | 1200_0 | Clustered           | 73 VC_1200_0 | 73  | 0.9825 | 1          | 0.9825 | 0 | 0 | 0 | 1 Ref      |
| KU160673 | Unassigned | Unassigned | Unassigned | 1211_1 | Clustered           | 3 VC_1211_1  | 3   | 0.3052 | 0.99836447 | 0.3047 | 0 | 0 | 0 | 1 Ref      |
| KU160674 | Unassigned | Unassigned | Unassigned | 985_0  | Clustered           | 38 VC_985_0  | 38  | 0.9334 | 1          | 0.9334 | 0 | 0 | 0 | 1 Ref      |
| KU183006 | Unassigned | Unassigned | Unassigned | 848_0  | Clustered           | 124 VC_848_0 | 124 | 0.9484 | 1          | 0.9484 | 0 | 0 | 0 | 1 Ref      |
| KU189325 | Unassigned | Unassigned | Unassigned | 891_0  | Clustered           | 11 VC_891_0  | 11  | 0.9663 | 1          | 0.9663 | 0 | 0 | 0 | 1 Ref      |
| KU194205 | Unassigned | Unassigned | Unassigned | 595_0  | Clustered           | 35 VC_595_0  | 35  | 0.8809 | 1          | 0.8809 | 0 | 0 | 0 | 1 Ref      |
| KU194206 | Unassigned | Unassigned | Unassigned | 595_0  | Clustered           | 35 VC_595_0  | 35  | 0.8809 | 1          | 0.8809 | 0 | 0 | 0 | 1 Ref      |
| KU197013 | Unassigned | Unassigned | Unassigned | 75_0   | Clustered           | 15 VC_75_0   | 15  | 0.518  | 1          | 0.518  | 0 | 0 | 0 | 1 Ref      |
| KU197014 | Unassigned | Unassigned | Unassigned | 766_0  | Clustered           | 40 VC_766_0  | 40  | 0.7511 | 1          | 0.7511 | 0 | 0 | 0 | 1 Ref      |
| KU198331 | Unassigned | Unassigned | Unassigned | 80_7   | Clustered           | 33 VC_80_7   | 33  | 0.2156 | 1          | 0.2156 | 0 | 0 | 0 | 0.8409 Ref |
| KU199707 | Unassigned | Unassigned | Unassigned | 185_0  | Clustered           | 53 VC_185_0  | 53  | 0.9153 | 1          | 0.9153 | 0 | 0 | 0 | 1 Ref      |
| KU199708 | Unassigned | Unassigned | Unassigned | 185_0  | Clustered           | 53 VC_185_0  | 53  | 0.9153 | 1          | 0.9153 | 0 | 0 | 0 | 1 Ref      |
| KU199709 | Unassigned | Unassigned | Unassigned | 185_0  | Clustered           | 53 VC_185_0  | 53  | 0.9153 | 1          | 0.9153 | 0 | 0 | 0 | 1 Ref      |
| KU199710 | Unassigned | Unassigned | Unassigned | 304_0  | Clustered           | 5 VC_304_0   | 5   | 0.1053 | 0.99999993 | 0.1053 | 0 | 0 | 0 | 0.9 Ref    |
| KU204984 | Unassigned | Unassigned | Unassigned | 175_0  | Clustered           | 20 VC_175_0  | 20  | 0.7504 | 1          | 0.7504 | 0 | 0 | 0 | 1 Ref      |
| KU230356 | Unassigned | Unassigned | Unassigned | 1214_0 | Clustered           | 6 VC_1214_0  | 6   | 0.9948 | 0.99999296 | 0.9948 | 0 | 0 | 0 | 1 Ref      |
| KU234099 | Unassigned | Unassigned | Unassigned | 917_0  | Clustered           | 28 VC_917_0  | 28  | 0.5465 | 1          | 0.5465 | 0 | 0 | 0 | 1 Ref      |
| KU234532 | Unassigned | Unassigned | Unassigned | 1215_0 | Clustered           | 4 VC_1215_0  | 4   | 1      | 1          | 1      | 0 | 0 | 0 | 1 Ref      |
| KU234533 | Unassigned | Unassigned | Unassigned | 1215_0 | Clustered           | 4 VC_1215_0  | 4   | 1      | 1          | 1      | 0 | 0 | 0 | 1 Ref      |
| KU238068 | Unassigned | Unassigned | Unassigned | 35_0   | Clustered           | 35 VC_35_0   | 35  | 0.431  | 1          | 0.431  | 0 | 0 | 0 | 1 Ref      |
| KU238069 | Unassigned | Unassigned | Unassigned | 35_0   | Clustered           | 35 VC_35_0   | 35  | 0.431  | 1          | 0.431  | 0 | 0 | 0 | 1 Ref      |
| KU238070 | Unassigned | Unassigned | Unassigned | 35_0   | Clustered           | 35 VC_35_0   | 35  | 0.431  | 1          | 0.431  | 0 | 0 | 0 | 1 Ref      |
| KU245542 | Unassigned | Unassigned | Unassigned | 1068_0 | Clustered           | 8 VC_1068_0  | 8   | 0.9291 | 1          | 0.9291 | 0 | 0 | 0 | 1 Ref      |
| KU253712 | Unassigned | Unassigned | Unassigned | 87_8   | Clustered/Singleton | 1 VC_87_8    | 1   | 0      | 1          | 0      | 0 | 0 | 0 | 1 Ref      |
| KU255188 | Unassigned | Unassigned | Unassigned | 532_0  | Clustered           | 75 VC_532_0  | 75  | 0.9393 | 1          | 0.9393 | 0 | 0 | 0 | 1 Ref      |
| KU255730 | Unassigned | Unassigned | Unassigned | 293_8  | Clustered/Singleton | 1 VC_293_8   | 1   | 0      | 1          | 0      | 0 | 0 | 0 | 1 Ref      |
| KU297675 | Unassigned | Unassigned | Unassigned | 77_0   | Clustered           | 37 VC_77_0   | 37  | 0.9392 | 1          | 0.9392 | 0 | 0 | 0 | 1 Ref      |
| KU297783 | Unassigned | Unassigned | Unassigned | 223_4  | Clustered           | 13 VC_223_4  | 13  | 0.1649 | 1          | 0.1649 | 0 | 0 | 0 | 1 Ref      |
| KU298437 | Unassigned | Unassigned | Unassigned | 44_0   | Clustered           | 49 VC_44_0   | 49  | 0.4506 | 1          | 0.4506 | 0 | 0 | 0 | 0.8605 Ref |
| KU310943 | Unassigned | Unassigned | Unassigned | 304_1  | Clustered           | 20 VC_304_1  | 20  | 0.5632 | 1          | 0.5632 | 0 | 0 | 0 | 0.7684 Ref |
| KU356689 | Unassigned | Unassigned | Unassigned | 478_0  | Clustered           | 8 VC_478_0   | 8   | 0.2619 | 1          | 0.2619 | 0 | 0 | 0 | 1 Ref      |
| KU356690 | Unassigned | Unassigned | Unassigned | 803_0  | Clustered           | 2 VC_803_0   | 2   | 0.0373 | 0.95692559 | 0.0357 | 0 | 0 | 0 | 1 Ref      |
| KU356691 | Unassigned | Unassigned | Unassigned | 803_0  | Clustered           | 2 VC_803_0   | 2   | 0.0373 | 0.95692559 | 0.0357 | 0 | 0 | 0 | 1 Ref      |
| KU497559 | Unassigned | Unassigned | Unassigned | 77_0   | Clustered           | 37 VC_77_0   | 37  | 0.9392 | 1          | 0.9392 | 0 | 0 | 0 | 1 Ref      |
| KU504502 | Unassigned | Unassigned | Unassigned | 5_0    | Clustered           | 27 VC_5_0    | 27  | 0.9599 | 1          | 0.9599 | 0 | 0 | 0 | 1 Ref      |
| KU510289 | Unassigned | Unassigned | Unassigned | 713_0  | Clustered           | 26 VC_713_0  | 26  | 0.9358 | 1          | 0.9358 | 0 | 0 | 0 | 1 Ref      |
| KU517658 | Unassigned | Unassigned | Unassigned | 349_0  | Clustered           | 5 VC_349_0   | 5   | 0.191  | 0.97099341 | 0.1855 | 0 | 0 | 0 | 1 Ref      |
| KU521356 | Unassigned | Unassigned | Unassigned | 356_0  | Clustered           | 21 VC_356_0  | 21  | 0.5409 | 1          | 0.5409 | 0 | 0 | 0 | 1 Ref      |
| KU522583 | Unassigned | Unassigned | Unassigned | 872_0  | Clustered           | 28 VC_872_0  | 28  | 0.7887 | 1          | 0.7887 | 0 | 0 | 0 | 1 Ref      |
| KU530220 | Unassigned | Unassigned | Unassigned | 891_0  | Clustered           | 11 VC_891_0  | 11  | 0.9663 | 1          | 0.9663 | 0 | 0 | 0 | 1 Ref      |
| KU535860 | Unassigned | Unassigned | Unassigned | 772_0  | Clustered           | 9 VC_772_0   | 9   | 0.4468 | 1          | 0.4468 | 0 | 0 | 0 | 1 Ref      |
| KU568494 | Unassigned | Unassigned | Unassigned | 224_0  | Clustered           | 5 VC_224_0   | 5   | 0.0685 | 0.99999998 | 0.0685 | 0 | 0 | 0 | 1 Ref      |
| KU574722 | Unassigned | Unassigned | Unassigned | 170_5  | Clustered/Singleton | 1 VC_170_5   | 1   | 0      | 1          | 0      | 0 | 0 | 0 | 1 Ref      |
| KU577463 | Unassigned | Unassigned | Unassigned | 195_3  | Clustered           | 9 VC_195_3   | 9   | 0.1955 | 1          | 0.1955 | 0 | 0 | 0 | 0.8611 Ref |
| KU578077 | Unassigned | Unassigned | Unassigned | 532_0  | Clustered           | 75 VC_532_0  | 75  | 0.9393 | 1          | 0.9393 | 0 | 0 | 0 | 1 Ref      |
| KU594606 | Unassigned | Unassigned | Unassigned | 447_6  | Clustered/Singleton | 1 VC_447_6   | 1   | 0      | 1          | 0      | 0 | 0 | 0 | 1 Ref      |
| KU594607 | Unassigned | Unassigned | Unassigned | 447_4  | Clustered           | 9 VC_447_4   | 9   | 0.127  | 1          | 0.127  | 0 | 0 | 0 | 1 Ref      |
| KU595432 | Unassigned | Unassigned | Unassigned | 75_0   | Clustered           | 15 VC_75_0   | 15  | 0.518  | 1          | 0.518  | 0 | 0 | 0 | 1 Ref      |



|          |            |            |            |        |                     |              |     |        |            |        |   |   |   |            |
|----------|------------|------------|------------|--------|---------------------|--------------|-----|--------|------------|--------|---|---|---|------------|
| KU595433 | Unassigned | Unassigned | Unassigned | 75_0   | Clustered           | 15 VC_75_0   | 15  | 0.518  | 1          | 0.518  | 0 | 0 | 0 | 1 Ref      |
| KU595434 | Unassigned | Unassigned | Unassigned | 654_0  | Clustered           | 115 VC_654_0 | 115 | 0.7303 | 1          | 0.7303 | 0 | 0 | 0 | 0.8764 Ref |
| KU599877 | Unassigned | Unassigned | Unassigned | 1198_0 | Clustered           | 24 VC_1198_0 | 24  | 1      | 1          | 1      | 0 | 0 | 0 | 1 Ref      |
| KU599878 | Unassigned | Unassigned | Unassigned | 1198_0 | Clustered           | 24 VC_1198_0 | 24  | 1      | 1          | 1      | 0 | 0 | 0 | 1 Ref      |
| KU599879 | Unassigned | Unassigned | Unassigned | 1198_0 | Clustered           | 24 VC_1198_0 | 24  | 1      | 1          | 1      | 0 | 0 | 0 | 1 Ref      |
| KU599880 | Unassigned | Unassigned | Unassigned | 1080_0 | Clustered           | 23 VC_1080_0 | 23  | 0.9603 | 1          | 0.9603 | 0 | 0 | 0 | 1 Ref      |
| KU599881 | Unassigned | Unassigned | Unassigned | 1080_0 | Clustered           | 23 VC_1080_0 | 23  | 0.9603 | 1          | 0.9603 | 0 | 0 | 0 | 1 Ref      |
| KU599882 | Unassigned | Unassigned | Unassigned | 1080_0 | Clustered           | 23 VC_1080_0 | 23  | 0.9603 | 1          | 0.9603 | 0 | 0 | 0 | 1 Ref      |
| KU599883 | Unassigned | Unassigned | Unassigned | 1080_0 | Clustered           | 23 VC_1080_0 | 23  | 0.9603 | 1          | 0.9603 | 0 | 0 | 0 | 1 Ref      |
| KU599884 | Unassigned | Unassigned | Unassigned | 1080_0 | Clustered           | 23 VC_1080_0 | 23  | 0.9603 | 1          | 0.9603 | 0 | 0 | 0 | 1 Ref      |
| KU599885 | Unassigned | Unassigned | Unassigned | 1080_0 | Clustered           | 23 VC_1080_0 | 23  | 0.9603 | 1          | 0.9603 | 0 | 0 | 0 | 1 Ref      |
| KU599886 | Unassigned | Unassigned | Unassigned | 1198_0 | Clustered           | 24 VC_1198_0 | 24  | 1      | 1          | 1      | 0 | 0 | 0 | 1 Ref      |
| KU599887 | Unassigned | Unassigned | Unassigned | 1061_0 | Clustered           | 8 VC_1061_0  | 8   | 0.8379 | 1          | 0.8379 | 0 | 0 | 0 | 1 Ref      |
| KU599888 | Unassigned | Unassigned | Unassigned | 1061_0 | Clustered           | 8 VC_1061_0  | 8   | 0.8379 | 1          | 0.8379 | 0 | 0 | 0 | 1 Ref      |
| KU599889 | Unassigned | Unassigned | Unassigned | 1061_0 | Clustered           | 8 VC_1061_0  | 8   | 0.8379 | 1          | 0.8379 | 0 | 0 | 0 | 1 Ref      |
| KU613353 | Unassigned | Unassigned | Unassigned | 232_0  | Clustered           | 32 VC_232_0  | 32  | 0.8471 | 1          | 0.8471 | 0 | 0 | 0 | 0.996 Ref  |
| KU640380 | Unassigned | Unassigned | Unassigned | 87_13  | Clustered/Singleton | 1 VC_87_13   | 1   | 0      | 1          | 0      | 0 | 0 | 0 | 1 Ref      |
| KU647626 | Unassigned | Unassigned | Unassigned | 1221_0 | Clustered           | 3 VC_1221_0  | 3   | 0.7566 | 0.96819872 | 0.7326 | 0 | 0 | 0 | 1 Ref      |
| KU647627 | Unassigned | Unassigned | Unassigned | 1221_0 | Clustered           | 3 VC_1221_0  | 3   | 0.7566 | 0.96819872 | 0.7326 | 0 | 0 | 0 | 1 Ref      |
| KU647628 | Unassigned | Unassigned | Unassigned | 825_0  | Clustered           | 17 VC_825_0  | 17  | 0.8364 | 1          | 0.8364 | 0 | 0 | 0 | 1 Ref      |
| KU647629 | Unassigned | Unassigned | Unassigned | 1116_0 | Clustered           | 24 VC_1116_0 | 24  | 0.8376 | 1          | 0.8376 | 0 | 0 | 0 | 1 Ref      |
| KU666550 | Unassigned | Unassigned | Unassigned | 113_0  | Clustered           | 91 VC_113_0  | 91  | 0.9584 | 1          | 0.9584 | 0 | 0 | 0 | 1 Ref      |
| KU678389 | Unassigned | Unassigned | Unassigned | 262_0  | Clustered           | 14 VC_262_0  | 14  | 0.2364 | 1          | 0.2364 | 0 | 0 | 0 | 1 Ref      |
| KU678390 | Unassigned | Unassigned | Unassigned | 262_0  | Clustered           | 14 VC_262_0  | 14  | 0.2364 | 1          | 0.2364 | 0 | 0 | 0 | 1 Ref      |
| KU678391 | Unassigned | Unassigned | Unassigned | 262_0  | Clustered           | 14 VC_262_0  | 14  | 0.2364 | 1          | 0.2364 | 0 | 0 | 0 | 1 Ref      |
| KU678392 | Unassigned | Unassigned | Unassigned | 262_0  | Clustered           | 14 VC_262_0  | 14  | 0.2364 | 1          | 0.2364 | 0 | 0 | 0 | 1 Ref      |
| KU686192 | Unassigned | Unassigned | Unassigned | 447_0  | Clustered           | 6 VC_447_0   | 6   | 0.0775 | 1          | 0.0775 | 0 | 0 | 0 | 1 Ref      |
| KU686193 | Unassigned | Unassigned | Unassigned | 447_0  | Clustered           | 6 VC_447_0   | 6   | 0.0775 | 1          | 0.0775 | 0 | 0 | 0 | 1 Ref      |
| KU686194 | Unassigned | Unassigned | Unassigned | 447_0  | Clustered           | 6 VC_447_0   | 6   | 0.0775 | 1          | 0.0775 | 0 | 0 | 0 | 1 Ref      |
| KU686195 | Unassigned | Unassigned | Unassigned | 447_0  | Clustered           | 6 VC_447_0   | 6   | 0.0775 | 1          | 0.0775 | 0 | 0 | 0 | 1 Ref      |
| KU686196 | Unassigned | Unassigned | Unassigned | 447_0  | Clustered           | 6 VC_447_0   | 6   | 0.0775 | 1          | 0.0775 | 0 | 0 | 0 | 1 Ref      |
| KU686197 | Unassigned | Unassigned | Unassigned | 447_3  | Clustered           | 3 VC_447_3   | 3   | 0.0288 | 0.9981281  | 0.0288 | 0 | 0 | 0 | 1 Ref      |
| KU686198 | Unassigned | Unassigned | Unassigned | 447_3  | Clustered           | 3 VC_447_3   | 3   | 0.0288 | 0.9981281  | 0.0288 | 0 | 0 | 0 | 1 Ref      |
| KU686199 | Unassigned | Unassigned | Unassigned | 447_3  | Clustered           | 3 VC_447_3   | 3   | 0.0288 | 0.9981281  | 0.0288 | 0 | 0 | 0 | 1 Ref      |
| KU686200 | Unassigned | Unassigned | Unassigned | 447_1  | Clustered           | 9 VC_447_1   | 9   | 0.1269 | 1          | 0.1269 | 0 | 0 | 0 | 0.8611 Ref |
| KU686201 | Unassigned | Unassigned | Unassigned | 447_1  | Clustered           | 9 VC_447_1   | 9   | 0.1269 | 1          | 0.1269 | 0 | 0 | 0 | 0.8611 Ref |
| KU686202 | Unassigned | Unassigned | Unassigned | 447_1  | Clustered           | 9 VC_447_1   | 9   | 0.1269 | 1          | 0.1269 | 0 | 0 | 0 | 0.8611 Ref |
| KU686204 | Unassigned | Unassigned | Unassigned | 446_15 | Clustered           | 3 VC_446_15  | 3   | 0.0409 | 0.99855682 | 0.0409 | 0 | 0 | 0 | 1 Ref      |
| KU686205 | Unassigned | Unassigned | Unassigned | 446_15 | Clustered           | 3 VC_446_15  | 3   | 0.0409 | 0.99855682 | 0.0409 | 0 | 0 | 0 | 1 Ref      |
| KU686206 | Unassigned | Unassigned | Unassigned | 446_15 | Clustered           | 3 VC_446_15  | 3   | 0.0409 | 0.99855682 | 0.0409 | 0 | 0 | 0 | 1 Ref      |
| KU686207 | Unassigned | Unassigned | Unassigned | 674_5  | Clustered           | 3 VC_674_5   | 3   | 0.0163 | 0.9986063  | 0.0163 | 0 | 0 | 0 | 1 Ref      |
| KU686208 | Unassigned | Unassigned | Unassigned | 674_5  | Clustered           | 3 VC_674_5   | 3   | 0.0163 | 0.9986063  | 0.0163 | 0 | 0 | 0 | 1 Ref      |
| KU686209 | Unassigned | Unassigned | Unassigned | 674_5  | Clustered           | 3 VC_674_5   | 3   | 0.0163 | 0.9986063  | 0.0163 | 0 | 0 | 0 | 1 Ref      |
| KU686211 | Unassigned | Unassigned | Unassigned | 447_10 | Clustered/Singleton | 1 VC_447_10  | 1   | 0      | 1          | 0      | 0 | 0 | 0 | 1 Ref      |
| KU686212 | Unassigned | Unassigned | Unassigned | 676_0  | Clustered           | 3 VC_676_0   | 3   | 0.0217 | 0.92459149 | 0.0201 | 0 | 0 | 0 | 1 Ref      |
| KU686213 | Unassigned | Unassigned | Unassigned | 676_0  | Clustered           | 3 VC_676_0   | 3   | 0.0217 | 0.92459149 | 0.0201 | 0 | 0 | 0 | 1 Ref      |
| KU687347 | Unassigned | Unassigned | Unassigned | 398_0  | Clustered           | 51 VC_398_0  | 51  | 0.8741 | 1          | 0.8741 | 0 | 0 | 0 | 1 Ref      |
| KU687348 | Unassigned | Unassigned | Unassigned | 398_0  | Clustered           | 51 VC_398_0  | 51  | 0.8741 | 1          | 0.8741 | 0 | 0 | 0 | 1 Ref      |
| KU687349 | Unassigned | Unassigned | Unassigned | 465_0  | Clustered           | 80 VC_465_0  | 80  | 0.9988 | 1          | 0.9988 | 0 | 0 | 0 | 1 Ref      |
| KU687350 | Unassigned | Unassigned | Unassigned | 465_0  | Clustered           | 80 VC_465_0  | 80  | 0.9988 | 1          | 0.9988 | 0 | 0 | 0 | 1 Ref      |
| KU687351 | Unassigned | Unassigned | Unassigned | 465_0  | Clustered           | 80 VC_465_0  | 80  | 0.9988 | 1          | 0.9988 | 0 | 0 | 0 | 1 Ref      |
| KU695581 | Unassigned | Unassigned | Unassigned | 228_0  | Clustered           | 22 VC_228_0  | 22  | 0.7411 | 1          | 0.7411 | 0 | 0 | 0 | 1 Ref      |
| KU695582 | Unassigned | Unassigned | Unassigned | 230_0  | Clustered           | 38 VC_230_0  | 38  | 0.9076 | 1          | 0.9076 | 0 | 0 | 0 | 1 Ref      |
| KU708004 | Unassigned | Unassigned | Unassigned | 305_0  | Clustered/Singleton | 1 VC_305_0   | 1   | 0      | 1          | 0      | 0 | 0 | 0 | 1 Ref      |
| KU716094 | Unassigned | Unassigned | Unassigned | 232_0  | Clustered           | 32 VC_232_0  | 32  | 0.8471 | 1          | 0.8471 | 0 | 0 | 0 | 0.996 Ref  |
| KU716095 | Unassigned | Unassigned | Unassigned | 232_0  | Clustered           | 32 VC_232_0  | 32  | 0.8471 | 1          | 0.8471 | 0 | 0 | 0 | 0.996 Ref  |
| KU726251 | Unassigned | Unassigned | Unassigned | 994_5  | Clustered           | 19 VC_994_5  | 19  | 0.2622 | 1          | 0.2622 | 0 | 0 | 0 | 1 Ref      |
| KU728633 | Unassigned | Unassigned | Unassigned | 702_1  | Clustered           | 2 VC_702_1   | 2   | 0.2185 | 0.91327915 | 0.1996 | 0 | 0 | 0 | 1 Ref      |
| KU737344 | Unassigned | Unassigned | Unassigned | 913_0  | Clustered           | 28 VC_913_0  | 28  | 0.6206 | 1          | 0.6206 | 0 | 0 | 0 | 0.9841 Ref |
| KU737345 | Unassigned | Unassigned | Unassigned | 912_1  | Clustered           | 12 VC_912_1  | 12  | 0.2423 | 1          | 0.2423 | 0 | 0 | 0 | 1 Ref      |
| KU737346 | Unassigned | Unassigned | Unassigned | 912_0  | Clustered           | 10 VC_912_0  | 10  | 0.1994 | 1          | 0.1994 | 0 | 0 | 0 | 1 Ref      |
| KU737347 | Unassigned | Unassigned | Unassigned | 912_1  | Clustered           | 12 VC_912_1  | 12  | 0.2423 | 1          | 0.2423 | 0 | 0 | 0 | 1 Ref      |
| KU737348 | Unassigned | Unassigned | Unassigned | 913_0  | Clustered           | 28 VC_913_0  | 28  | 0.6206 | 1          | 0.6206 | 0 | 0 | 0 | 0.9841 Ref |
| KU737349 | Unassigned | Unassigned | Unassigned | 913_0  | Clustered           | 28 VC_913_0  | 28  | 0.6206 | 1          | 0.6206 | 0 | 0 | 0 | 0.9841 Ref |
| KU737350 | Unassigned | Unassigned | Unassigned | 913_0  | Clustered           | 28 VC_913_0  | 28  | 0.6206 | 1          | 0.6206 | 0 | 0 | 0 | 0.9841 Ref |
| KU737351 | Unassigned | Unassigned | Unassigned | 913_0  | Clustered           | 28 VC_913_0  | 28  | 0.6206 | 1          | 0.6206 | 0 | 0 | 0 | 0.9841 Ref |
| KU737352 | Unassigned | Unassigned | Unassigned | 913_0  | Clustered           | 28 VC_913_0  | 28  | 0.6206 | 1          | 0.6206 | 0 | 0 | 0 | 0.9841 Ref |
| KU743887 | Unassigned | Unassigned | Unassigned | 434_0  | Clustered           | 45 VC_434_0  | 45  | 0.9479 | 1          | 0.9479 | 0 | 0 | 0 | 1 Ref      |
| KU747973 | Unassigned | Unassigned | Unassigned | 663_0  | Clustered           | 5 VC_663_0   | 5   | 0.6645 | 0.99999974 | 0.6645 | 0 | 0 | 0 | 1 Ref      |
| KU760857 | Unassigned | Unassigned | Unassigned | 254_0  | Clustered           | 14 VC_254_0  | 14  | 0.9118 | 1          | 0.9118 | 0 | 0 | 0 | 0.967 Ref  |
| KU761558 | Unassigned | Unassigned | Unassigned | 223_3  | Clustered           | 8 VC_223_3   | 8   | 0.0699 | 1          | 0.0699 | 0 | 0 | 0 | 0.8571 Ref |
| KU761559 | Unassigned | Unassigned | Unassigned | 223_3  | Clustered           | 8 VC_223_3   | 8   | 0.0699 | 1          | 0.0699 | 0 | 0 | 0 | 0.8571 Ref |
| KU761955 | Unassigned | Unassigned | Unassigned | 77_0   | Clustered           | 37 VC_77_0   | 37  | 0.9392 | 1          | 0.9392 | 0 | 0 | 0 | 1 Ref      |
| KU831549 | Unassigned | Unassigned | Unassigned | 842_0  | Clustered           | 14 VC_842_0  | 14  | 0.6581 | 1          | 0.6581 | 0 | 0 | 0 | 1 Ref      |
| KU836751 | Unassigned | Unassigned | Unassigned | 102_0  | Clustered           | 15 VC_102_0  | 15  | 0.653  | 1          | 0.653  | 0 | 0 | 0 | 1 Ref      |
| KU847400 | Unassigned | Unassigned | Unassigned | 913_1  | Clustered           | 8 VC_913_1   | 8   | 0.1102 | 0.9989323  | 0.11   | 0 | 0 | 0 | 0.75 Ref   |
| KU848187 | Unassigned | Unassigned | Unassigned | 396_0  | Clustered           | 3 VC_396_0   | 3   | 0.3827 | 0.99764103 | 0.3818 | 0 | 0 | 0 | 1 Ref      |
| KU862660 | Unassigned | Unassigned | Unassigned | 992_1  | Clustered/Singleton | 1 VC_992_1   | 1   | 0      | 1          | 0      | 0 | 0 | 0 | 1 Ref      |
| KU865302 | Unassigned | Unassigned | Unassigned | 538_40 | Clustered           | 4 VC_538_40  | 4   | 0.0395 | 0.99998776 | 0.0394 | 0 | 0 | 0 | 1 Ref      |
| KU865303 | Unassigned | Unassigned | Unassigned | 571_2  | Clustered           | 17 VC_571_2  | 17  | 0.0965 | 1          | 0.0965 | 0 | 0 | 0 | 0.9779 Ref |
| KU867876 | Unassigned | Unassigned | Unassigned | 290_25 | Clustered/Singleton | 1 VC_290_25  | 1   | 0      | 1          | 0      | 0 | 0 | 0 | 1 Ref      |



|          |            |            |            |        |                     |              |     |        |            |        |   |   |   |        |     |
|----------|------------|------------|------------|--------|---------------------|--------------|-----|--------|------------|--------|---|---|---|--------|-----|
| KU867906 | Unassigned | Unassigned | Unassigned | 535_1  | Clustered           | 108 VC_535_1 | 108 | 0.8479 | 1          | 0.8479 | 0 | 0 | 0 | 0.9955 | Ref |
| KU867907 | Unassigned | Unassigned | Unassigned | 384_15 | Clustered           | 44 VC_384_15 | 44  | 0.139  | 1          | 0.139  | 0 | 0 | 0 | 0.7474 | Ref |
| KU878088 | Unassigned | Unassigned | Unassigned | 462_0  | Clustered           | 4 VC_462_0   | 4   | 0.3031 | 0.99978853 | 0.303  | 0 | 0 | 0 | 1      | Ref |
| KU878967 | Unassigned | Unassigned | Unassigned | 30_1   | Clustered           | 53 VC_30_1   | 53  | 0.7151 | 1          | 0.7151 | 0 | 0 | 0 | 0.9325 | Ref |
| KU878968 | Unassigned | Unassigned | Unassigned | 297_5  | Clustered           | 14 VC_297_5  | 14  | 0.141  | 1          | 0.141  | 0 | 0 | 0 | 0.9231 | Ref |
| KU878969 | Unassigned | Unassigned | Unassigned | 297_5  | Clustered           | 14 VC_297_5  | 14  | 0.141  | 1          | 0.141  | 0 | 0 | 0 | 0.9231 | Ref |
| KU884561 | Unassigned | Unassigned | Unassigned | 632_0  | Clustered           | 9 VC_632_0   | 9   | 0.9524 | 1          | 0.9524 | 0 | 0 | 0 | 1      | Ref |
| KU884562 | Unassigned | Unassigned | Unassigned | 632_0  | Clustered           | 9 VC_632_0   | 9   | 0.9524 | 1          | 0.9524 | 0 | 0 | 0 | 1      | Ref |
| KU884563 | Unassigned | Unassigned | Unassigned | 632_0  | Clustered           | 9 VC_632_0   | 9   | 0.9524 | 1          | 0.9524 | 0 | 0 | 0 | 1      | Ref |
| KU884564 | Unassigned | Unassigned | Unassigned | 632_0  | Clustered           | 9 VC_632_0   | 9   | 0.9524 | 1          | 0.9524 | 0 | 0 | 0 | 1      | Ref |
| KU884565 | Unassigned | Unassigned | Unassigned | 632_0  | Clustered           | 9 VC_632_0   | 9   | 0.9524 | 1          | 0.9524 | 0 | 0 | 0 | 1      | Ref |
| KU885988 | Unassigned | Unassigned | Unassigned | 857_0  | Clustered           | 16 VC_857_0  | 16  | 0.9317 | 1          | 0.9317 | 0 | 0 | 0 | 1      | Ref |
| KU885989 | Unassigned | Unassigned | Unassigned | 857_0  | Clustered           | 16 VC_857_0  | 16  | 0.9317 | 1          | 0.9317 | 0 | 0 | 0 | 1      | Ref |
| KU885990 | Unassigned | Unassigned | Unassigned | 857_0  | Clustered           | 16 VC_857_0  | 16  | 0.9317 | 1          | 0.9317 | 0 | 0 | 0 | 1      | Ref |
| KU886222 | Unassigned | Unassigned | Unassigned | 507_1  | Clustered           | 11 VC_507_1  | 11  | 0.4612 | 1          | 0.4612 | 0 | 0 | 0 | 1      | Ref |
| KU886223 | Unassigned | Unassigned | Unassigned | 507_1  | Clustered           | 11 VC_507_1  | 11  | 0.4612 | 1          | 0.4612 | 0 | 0 | 0 | 1      | Ref |
| KU886224 | Unassigned | Unassigned | Unassigned | 507_1  | Clustered           | 11 VC_507_1  | 11  | 0.4612 | 1          | 0.4612 | 0 | 0 | 0 | 1      | Ref |
| KU886225 | Unassigned | Unassigned | Unassigned | 507_1  | Clustered           | 11 VC_507_1  | 11  | 0.4612 | 1          | 0.4612 | 0 | 0 | 0 | 1      | Ref |
| KU925172 | Unassigned | Unassigned | Unassigned | 290_8  | Clustered/Singleton | 1 VC_290_8   | 1   | 0      |            | 0      | 0 | 0 | 0 | 1      | Ref |
| KU927491 | Unassigned | Unassigned | Unassigned | 30_1   | Clustered           | 53 VC_30_1   | 53  | 0.7151 | 1          | 0.7151 | 0 | 0 | 0 | 0.9325 | Ref |
| KU927492 | Unassigned | Unassigned | Unassigned | 30_1   | Clustered           | 53 VC_30_1   | 53  | 0.7151 | 1          | 0.7151 | 0 | 0 | 0 | 0.9325 | Ref |
| KU927493 | Unassigned | Unassigned | Unassigned | 47_0   | Clustered           | 12 VC_47_0   | 12  | 0.3571 | 1          | 0.3571 | 0 | 0 | 0 | 1      | Ref |
| KU927494 | Unassigned | Unassigned | Unassigned | 30_1   | Clustered           | 53 VC_30_1   | 53  | 0.7151 | 1          | 0.7151 | 0 | 0 | 0 | 0.9325 | Ref |
| KU927495 | Unassigned | Unassigned | Unassigned | 30_1   | Clustered           | 53 VC_30_1   | 53  | 0.7151 | 1          | 0.7151 | 0 | 0 | 0 | 0.9325 | Ref |
| KU927496 | Unassigned | Unassigned | Unassigned | 30_1   | Clustered           | 53 VC_30_1   | 53  | 0.7151 | 1          | 0.7151 | 0 | 0 | 0 | 0.9325 | Ref |
| KU927497 | Unassigned | Unassigned | Unassigned | 199_19 | Clustered           | 12 VC_199_19 | 12  | 0.0651 | 1          | 0.0651 | 0 | 0 | 0 | 0.8636 | Ref |
| KU927498 | Unassigned | Unassigned | Unassigned | 30_1   | Clustered           | 53 VC_30_1   | 53  | 0.7151 | 1          | 0.7151 | 0 | 0 | 0 | 0.9325 | Ref |
| KU927499 | Unassigned | Unassigned | Unassigned | 405_0  | Clustered           | 126 VC_405_0 | 126 | 0.9614 | 1          | 0.9614 | 0 | 0 | 0 | 1      | Ref |
| KU927500 | Unassigned | Unassigned | Unassigned | 611_0  | Clustered           | 50 VC_611_0  | 50  | 0.7306 | 1          | 0.7306 | 0 | 0 | 0 | 1      | Ref |
| KU935726 | Unassigned | Unassigned | Unassigned | 539_0  | Clustered           | 37 VC_539_0  | 37  | 0.911  | 1          | 0.911  | 0 | 0 | 0 | 1      | Ref |
| KU935727 | Unassigned | Unassigned | Unassigned | 539_0  | Clustered           | 37 VC_539_0  | 37  | 0.911  | 1          | 0.911  | 0 | 0 | 0 | 1      | Ref |
| KU935728 | Unassigned | Unassigned | Unassigned | 539_0  | Clustered           | 37 VC_539_0  | 37  | 0.911  | 1          | 0.911  | 0 | 0 | 0 | 1      | Ref |
| KU935729 | Unassigned | Unassigned | Unassigned | 539_0  | Clustered           | 37 VC_539_0  | 37  | 0.911  | 1          | 0.911  | 0 | 0 | 0 | 1      | Ref |
| KU935730 | Unassigned | Unassigned | Unassigned | 539_0  | Clustered           | 37 VC_539_0  | 37  | 0.911  | 1          | 0.911  | 0 | 0 | 0 | 1      | Ref |
| KU935731 | Unassigned | Unassigned | Unassigned | 539_0  | Clustered           | 37 VC_539_0  | 37  | 0.911  | 1          | 0.911  | 0 | 0 | 0 | 1      | Ref |
| KU946962 | Unassigned | Unassigned | Unassigned | 466_0  | Clustered           | 66 VC_466_0  | 66  | 0.9246 | 1          | 0.9246 | 0 | 0 | 0 | 1      | Ref |
| KU948710 | Unassigned | Unassigned | Unassigned | 862_0  | Clustered           | 29 VC_862_0  | 29  | 0.8594 | 1          | 0.8594 | 0 | 0 | 0 | 1      | Ref |
| KU951146 | Unassigned | Unassigned | Unassigned | 654_0  | Clustered           | 115 VC_654_0 | 115 | 0.7303 | 1          | 0.7303 | 0 | 0 | 0 | 0.8764 | Ref |
| KU951147 | Unassigned | Unassigned | Unassigned | 654_0  | Clustered           | 115 VC_654_0 | 115 | 0.7303 | 1          | 0.7303 | 0 | 0 | 0 | 0.8764 | Ref |
| KU958700 | Unassigned | Unassigned | Unassigned | 607_0  | Clustered           | 2 VC_607_0   | 2   | 0.0776 | 0.94661631 | 0.0735 | 0 | 0 | 0 | 1      | Ref |
| KU963245 | Unassigned | Unassigned | Unassigned | 895_0  | Clustered           | 25 VC_895_0  | 25  | 0.5768 | 1          | 0.5768 | 0 | 0 | 0 | 1      | Ref |
| KU963246 | Unassigned | Unassigned | Unassigned | 1216_0 | Clustered           | 22 VC_1216_0 | 22  | 0.4546 | 1          | 0.4546 | 0 | 0 | 0 | 1      | Ref |
| KU963247 | Unassigned | Unassigned | Unassigned | 1216_0 | Clustered           | 22 VC_1216_0 | 22  | 0.4546 | 1          | 0.4546 | 0 | 0 | 0 | 1      | Ref |
| KU963249 | Unassigned | Unassigned | Unassigned | 543_1  | Clustered           | 5 VC_543_1   | 5   | 0.0484 | 0.99999947 | 0.0484 | 0 | 0 | 0 | 0.9    | Ref |
| KU963250 | Unassigned | Unassigned | Unassigned | 1136_0 | Clustered           | 40 VC_1136_0 | 40  | 0.8746 | 1          | 0.8746 | 0 | 0 | 0 | 1      | Ref |
| KU963251 | Unassigned | Unassigned | Unassigned | 1217_0 | Clustered           | 41 VC_1217_0 | 41  | 0.9546 | 1          | 0.9546 | 0 | 0 | 0 | 0.9976 | Ref |
| KU963252 | Unassigned | Unassigned | Unassigned | 1218_0 | Clustered           | 14 VC_1218_0 | 14  | 0.7811 | 1          | 0.7811 | 0 | 0 | 0 | 0.989  | Ref |
| KU963253 | Unassigned | Unassigned | Unassigned | 1138_0 | Clustered           | 16 VC_1138_0 | 16  | 0.4566 | 1          | 0.4566 | 0 | 0 | 0 | 1      | Ref |
| KU963254 | Unassigned | Unassigned | Unassigned | 1217_0 | Clustered           | 41 VC_1217_0 | 41  | 0.9546 | 1          | 0.9546 | 0 | 0 | 0 | 0.9976 | Ref |
| KU963255 | Unassigned | Unassigned | Unassigned | 543_0  | Clustered           | 25 VC_543_0  | 25  | 0.4584 | 1          | 0.4584 | 0 | 0 | 0 | 1      | Ref |
| KU963256 | Unassigned | Unassigned | Unassigned | 540_0  | Clustered           | 3 VC_540_0   | 3   | 0.083  | 0.9985266  | 0.0829 | 0 | 0 | 0 | 1      | Ref |
| KU963257 | Unassigned | Unassigned | Unassigned | 543_0  | Clustered           | 25 VC_543_0  | 25  | 0.4584 | 1          | 0.4584 | 0 | 0 | 0 | 1      | Ref |
| KU963258 | Unassigned | Unassigned | Unassigned | 896_0  | Clustered           | 9 VC_896_0   | 9   | 0.2604 | 1          | 0.2604 | 0 | 0 | 0 | 1      | Ref |
| KU963259 | Unassigned | Unassigned | Unassigned | 1217_0 | Clustered           | 41 VC_1217_0 | 41  | 0.9546 | 1          | 0.9546 | 0 | 0 | 0 | 0.9976 | Ref |
| KU963260 | Unassigned | Unassigned | Unassigned | 952_0  | Clustered           | 39 VC_952_0  | 39  | 0.9064 | 1          | 0.9064 | 0 | 0 | 0 | 1      | Ref |
| KU963261 | Unassigned | Unassigned | Unassigned | 989_0  | Clustered           | 13 VC_989_0  | 13  | 0.8622 | 1          | 0.8622 | 0 | 0 | 0 | 1      | Ref |
| KU963262 | Unassigned | Unassigned | Unassigned | 896_0  | Clustered           | 9 VC_896_0   | 9   | 0.2604 | 1          | 0.2604 | 0 | 0 | 0 | 1      | Ref |
| KU963263 | Unassigned | Unassigned | Unassigned | 543_1  | Clustered           | 5 VC_543_1   | 5   | 0.0484 | 0.99999947 | 0.0484 | 0 | 0 | 0 | 0.9    | Ref |
| KU984914 | Unassigned | Unassigned | Unassigned | 532_0  | Clustered           | 75 VC_532_0  | 75  | 0.9393 | 1          | 0.9393 | 0 | 0 | 0 | 1      | Ref |
| KU985090 | Unassigned | Unassigned | Unassigned | 537_0  | Clustered           | 39 VC_537_0  | 39  | 0.8148 | 1          | 0.8148 | 0 | 0 | 0 | 1      | Ref |
| KU985091 | Unassigned | Unassigned | Unassigned | 532_0  | Clustered           | 75 VC_532_0  | 75  | 0.9393 | 1          | 0.9393 | 0 | 0 | 0 | 1      | Ref |
| KU985092 | Unassigned | Unassigned | Unassigned | 535_1  | Clustered           | 108 VC_535_1 | 108 | 0.8479 | 1          | 0.8479 | 0 | 0 | 0 | 0.9955 | Ref |
| KU985093 | Unassigned | Unassigned | Unassigned | 223_6  | Clustered           | 42 VC_223_6  | 42  | 0.4717 | 1          | 0.4717 | 0 | 0 | 0 | 0.8351 | Ref |
| KU985094 | Unassigned | Unassigned | Unassigned | 535_1  | Clustered           | 108 VC_535_1 | 108 | 0.8479 | 1          | 0.8479 | 0 | 0 | 0 | 0.9955 | Ref |
| KU985095 | Unassigned | Unassigned | Unassigned | 223_6  | Clustered           | 42 VC_223_6  | 42  | 0.4717 | 1          | 0.4717 | 0 | 0 | 0 | 0.8351 | Ref |
| KU985096 | Unassigned | Unassigned | Unassigned | 230_0  | Clustered           | 38 VC_230_0  | 38  | 0.9076 | 1          | 0.9076 | 0 | 0 | 0 | 1      | Ref |
| KU992911 | Unassigned | Unassigned | Unassigned | 98_0   | Clustered           | 30 VC_98_0   | 30  | 0.7175 | 1          | 0.7175 | 0 | 0 | 0 | 1      | Ref |
| KU997639 | Unassigned | Unassigned | Unassigned | 917_0  | Clustered           | 28 VC_917_0  | 28  | 0.5465 | 1          | 0.5465 | 0 | 0 | 0 | 1      | Ref |
| KU998234 | Unassigned | Unassigned | Unassigned | 1219_0 | Clustered           | 24 VC_1219_0 | 24  | 0.9519 | 1          | 0.9519 | 0 | 0 | 0 | 1      | Ref |
| KU998235 | Unassigned | Unassigned | Unassigned | 1218_0 | Clustered           | 14 VC_1218_0 | 14  | 0.7811 | 1          | 0.7811 | 0 | 0 | 0 | 0.989  | Ref |
| KU998236 | Unassigned | Unassigned | Unassigned | 1217_0 | Clustered           | 41 VC_1217_0 | 41  | 0.9546 | 1          | 0.9546 | 0 | 0 | 0 | 0.9976 | Ref |
| KU998237 | Unassigned | Unassigned | Unassigned | 419_0  | Clustered           | 11 VC_419_0  | 11  | 0.9465 | 1          | 0.9465 | 0 | 0 | 0 | 1      | Ref |
| KU998238 | Unassigned | Unassigned | Unassigned | 419_0  | Clustered           | 11 VC_419_0  | 11  | 0.9465 | 1          | 0.9465 | 0 | 0 | 0 | 1      | Ref |
| KU998239 | Unassigned | Unassigned | Unassigned | 952_0  | Clustered           | 39 VC_952_0  | 39  | 0.9064 | 1          | 0.9064 | 0 | 0 | 0 | 1      | Ref |
| KU998240 | Unassigned | Unassigned | Unassigned | 893_1  | Clustered           | 20 VC_893_1  | 20  | 0.4792 | 1          | 0.4792 | 0 | 0 | 0 | 1      | Ref |
| KU998241 | Unassigned | Unassigned | Unassigned | 895_0  | Clustered           | 25 VC_895_0  | 25  | 0.5768 | 1          | 0.5768 | 0 | 0 | 0 | 1      | Ref |
| KU998242 | Unassigned | Unassigned | Unassigned | 896_0  | Clustered           | 9 VC_896_0   | 9   | 0.2604 | 1          | 0.2604 | 0 | 0 | 0 | 1      | Ref |
| KU998243 | Unassigned | Unassigned | Unassigned | 896_0  | Clustered           | 9 VC_896_0   | 9   | 0.2604 | 1          | 0.2604 | 0 | 0 | 0 | 1      | Ref |
| KU998244 | Unassigned | Unassigned | Unassigned | 1223_1 | Clustered           | 10 VC_1223_1 | 10  | 0.5795 | 1          | 0.5795 | 0 | 0 | 0 | 1      | Ref |
| KU998245 | Unassigned | Unassigned | Unassigned | 1223_0 | Clustered           | 2 VC_1223_0  | 2   | 0.0456 | 0.95126432 | 0.0434 | 0 | 0 | 0 | 1      | Ref |
| KU998246 | Unassigned | Unassigned | Unassigned | 1223_1 | Clustered           | 10 VC_1223_1 | 10  | 0.5795 | 1          | 0.5795 | 0 | 0 | 0 | 1      | Ref |



|          |            |            |            |         |                     |              |    |        |            |        |   |   |   |            |
|----------|------------|------------|------------|---------|---------------------|--------------|----|--------|------------|--------|---|---|---|------------|
| KU998247 | Unassigned | Unassigned | Unassigned | 1223_1  | Clustered           | 10 VC_1223_1 | 10 | 0.5795 | 1          | 0.5795 | 0 | 0 | 0 | 1 Ref      |
| KU998248 | Unassigned | Unassigned | Unassigned | 1217_0  | Clustered           | 41 VC_1217_0 | 41 | 0.9546 | 1          | 0.9546 | 0 | 0 | 0 | 0.9976 Ref |
| KU998249 | Unassigned | Unassigned | Unassigned | 231_0   | Clustered           | 19 VC_231_0  | 19 | 0.9378 | 1          | 0.9378 | 0 | 0 | 0 | 1 Ref      |
| KU998250 | Unassigned | Unassigned | Unassigned | 231_0   | Clustered           | 19 VC_231_0  | 19 | 0.9378 | 1          | 0.9378 | 0 | 0 | 0 | 1 Ref      |
| KU998251 | Unassigned | Unassigned | Unassigned | 231_0   | Clustered           | 19 VC_231_0  | 19 | 0.9378 | 1          | 0.9378 | 0 | 0 | 0 | 1 Ref      |
| KU998252 | Unassigned | Unassigned | Unassigned | 897_0   | Clustered           | 5 VC_897_0   | 5  | 0.4183 | 0.99999997 | 0.4183 | 0 | 0 | 0 | 1 Ref      |
| KU998253 | Unassigned | Unassigned | Unassigned | 897_0   | Clustered           | 5 VC_897_0   | 5  | 0.4183 | 0.99999997 | 0.4183 | 0 | 0 | 0 | 1 Ref      |
| KU998254 | Unassigned | Unassigned | Unassigned | 897_0   | Clustered           | 5 VC_897_0   | 5  | 0.4183 | 0.99999997 | 0.4183 | 0 | 0 | 0 | 1 Ref      |
| KX009778 | Unassigned | Unassigned | Unassigned | 290_139 | Clustered/Singleton | 1 VC_290_139 | 1  | 0      | 1          | 0      | 0 | 0 | 0 | 1 Ref      |
| KX011028 | Unassigned | Unassigned | Unassigned | 155_27  | Clustered/Singleton | 1 VC_155_27  | 1  | 0      | 1          | 0      | 0 | 0 | 0 | 1 Ref      |
| KX011169 | Unassigned | Unassigned | Unassigned | 913_1   | Clustered           | 8 VC_913_1   | 8  | 0.1102 | 0.9989323  | 0.11   | 0 | 0 | 0 | 0.75 Ref   |
| KX015770 | Unassigned | Unassigned | Unassigned | 603_0   | Clustered           | 28 VC_603_0  | 28 | 0.7692 | 1          | 0.7692 | 0 | 0 | 0 | 1 Ref      |
| KX015771 | Unassigned | Unassigned | Unassigned | 603_0   | Clustered           | 28 VC_603_0  | 28 | 0.7692 | 1          | 0.7692 | 0 | 0 | 0 | 1 Ref      |
| KX017520 | Unassigned | Unassigned | Unassigned | 475_0   | Clustered           | 96 VC_475_0  | 96 | 0.9303 | 1          | 0.9303 | 0 | 0 | 0 | 0.9575 Ref |
| KX017521 | Unassigned | Unassigned | Unassigned | 199_19  | Clustered           | 12 VC_199_19 | 12 | 0.0651 | 1          | 0.0651 | 0 | 0 | 0 | 0.8636 Ref |
| KX058879 | Unassigned | Unassigned | Unassigned | 5_0     | Clustered           | 27 VC_5_0    | 27 | 0.9599 | 1          | 0.9599 | 0 | 0 | 0 | 1 Ref      |
| KX077179 | Unassigned | Unassigned | Unassigned | 188_0   | Clustered           | 5 VC_188_0   | 5  | 0.6188 | 0.99999978 | 0.6188 | 0 | 0 | 0 | 1 Ref      |
| KX077892 | Unassigned | Unassigned | Unassigned | 1229_0  | Clustered           | 5 VC_1229_0  | 5  | 0.9893 | 0.91813282 | 0.9083 | 0 | 0 | 0 | 1 Ref      |
| KX077893 | Unassigned | Unassigned | Unassigned | 1229_0  | Clustered           | 5 VC_1229_0  | 5  | 0.9893 | 0.91813282 | 0.9083 | 0 | 0 | 0 | 1 Ref      |
| KX077894 | Unassigned | Unassigned | Unassigned | 268_1   | Clustered           | 20 VC_268_1  | 20 | 0.1906 | 1          | 0.1906 | 0 | 0 | 0 | 0.6789 Ref |
| KX077896 | Unassigned | Unassigned | Unassigned | 647_0   | Clustered           | 37 VC_647_0  | 37 | 0.5847 | 1          | 0.5847 | 0 | 0 | 0 | 0.9234 Ref |
| KX078568 | Unassigned | Unassigned | Unassigned | 403_0   | Clustered           | 4 VC_403_0   | 4  | 0.0462 | 0.99998824 | 0.0462 | 0 | 0 | 0 | 1 Ref      |
| KX078569 | Unassigned | Unassigned | Unassigned | 295_1   | Clustered/Singleton | 1 VC_295_1   | 1  | 0      | 1          | 0      | 0 | 0 | 0 | 1 Ref      |
| KX098389 | Unassigned | Unassigned | Unassigned | 801_2   | Clustered           | 5 VC_801_2   | 5  | 0.087  | 0.99999997 | 0.087  | 0 | 0 | 0 | 1 Ref      |
| KX098390 | Unassigned | Unassigned | Unassigned | 801_2   | Clustered           | 5 VC_801_2   | 5  | 0.087  | 0.99999997 | 0.087  | 0 | 0 | 0 | 1 Ref      |
| KX098391 | Unassigned | Unassigned | Unassigned | 801_2   | Clustered           | 5 VC_801_2   | 5  | 0.087  | 0.99999997 | 0.087  | 0 | 0 | 0 | 1 Ref      |
| KX119174 | Unassigned | Unassigned | Unassigned | 101_0   | Clustered           | 32 VC_101_0  | 32 | 0.8826 | 1          | 0.8826 | 0 | 0 | 0 | 1 Ref      |
| KX119175 | Unassigned | Unassigned | Unassigned | 101_0   | Clustered           | 32 VC_101_0  | 32 | 0.8826 | 1          | 0.8826 | 0 | 0 | 0 | 1 Ref      |
| KX119176 | Unassigned | Unassigned | Unassigned | 101_0   | Clustered           | 32 VC_101_0  | 32 | 0.8826 | 1          | 0.8826 | 0 | 0 | 0 | 1 Ref      |
| KX119177 | Unassigned | Unassigned | Unassigned | 101_0   | Clustered           | 32 VC_101_0  | 32 | 0.8826 | 1          | 0.8826 | 0 | 0 | 0 | 1 Ref      |
| KX119182 | Unassigned | Unassigned | Unassigned | 101_0   | Clustered           | 32 VC_101_0  | 32 | 0.8826 | 1          | 0.8826 | 0 | 0 | 0 | 1 Ref      |
| KX119188 | Unassigned | Unassigned | Unassigned | 101_0   | Clustered           | 32 VC_101_0  | 32 | 0.8826 | 1          | 0.8826 | 0 | 0 | 0 | 1 Ref      |
| KX119189 | Unassigned | Unassigned | Unassigned | 101_0   | Clustered           | 32 VC_101_0  | 32 | 0.8826 | 1          | 0.8826 | 0 | 0 | 0 | 1 Ref      |
| KX119190 | Unassigned | Unassigned | Unassigned | 101_0   | Clustered           | 32 VC_101_0  | 32 | 0.8826 | 1          | 0.8826 | 0 | 0 | 0 | 1 Ref      |
| KX119191 | Unassigned | Unassigned | Unassigned | 101_0   | Clustered           | 32 VC_101_0  | 32 | 0.8826 | 1          | 0.8826 | 0 | 0 | 0 | 1 Ref      |
| KX119192 | Unassigned | Unassigned | Unassigned | 101_0   | Clustered           | 32 VC_101_0  | 32 | 0.8826 | 1          | 0.8826 | 0 | 0 | 0 | 1 Ref      |
| KX119193 | Unassigned | Unassigned | Unassigned | 101_0   | Clustered           | 32 VC_101_0  | 32 | 0.8826 | 1          | 0.8826 | 0 | 0 | 0 | 1 Ref      |
| KX119194 | Unassigned | Unassigned | Unassigned | 101_0   | Clustered           | 32 VC_101_0  | 32 | 0.8826 | 1          | 0.8826 | 0 | 0 | 0 | 1 Ref      |
| KX119195 | Unassigned | Unassigned | Unassigned | 101_0   | Clustered           | 32 VC_101_0  | 32 | 0.8826 | 1          | 0.8826 | 0 | 0 | 0 | 1 Ref      |
| KX119196 | Unassigned | Unassigned | Unassigned | 101_0   | Clustered           | 32 VC_101_0  | 32 | 0.8826 | 1          | 0.8826 | 0 | 0 | 0 | 1 Ref      |
| KX119197 | Unassigned | Unassigned | Unassigned | 101_0   | Clustered           | 32 VC_101_0  | 32 | 0.8826 | 1          | 0.8826 | 0 | 0 | 0 | 1 Ref      |
| KX119198 | Unassigned | Unassigned | Unassigned | 101_0   | Clustered           | 32 VC_101_0  | 32 | 0.8826 | 1          | 0.8826 | 0 | 0 | 0 | 1 Ref      |
| KX119199 | Unassigned | Unassigned | Unassigned | 101_0   | Clustered           | 32 VC_101_0  | 32 | 0.8826 | 1          | 0.8826 | 0 | 0 | 0 | 1 Ref      |
| KX119200 | Unassigned | Unassigned | Unassigned | 101_0   | Clustered           | 32 VC_101_0  | 32 | 0.8826 | 1          | 0.8826 | 0 | 0 | 0 | 1 Ref      |
| KX119201 | Unassigned | Unassigned | Unassigned | 101_0   | Clustered           | 32 VC_101_0  | 32 | 0.8826 | 1          | 0.8826 | 0 | 0 | 0 | 1 Ref      |
| KX119202 | Unassigned | Unassigned | Unassigned | 101_0   | Clustered           | 32 VC_101_0  | 32 | 0.8826 | 1          | 0.8826 | 0 | 0 | 0 | 1 Ref      |
| KX119203 | Unassigned | Unassigned | Unassigned | 101_0   | Clustered           | 32 VC_101_0  | 32 | 0.8826 | 1          | 0.8826 | 0 | 0 | 0 | 1 Ref      |
| KX119204 | Unassigned | Unassigned | Unassigned | 101_0   | Clustered           | 32 VC_101_0  | 32 | 0.8826 | 1          | 0.8826 | 0 | 0 | 0 | 1 Ref      |
| KX119205 | Unassigned | Unassigned | Unassigned | 101_0   | Clustered           | 32 VC_101_0  | 32 | 0.8826 | 1          | 0.8826 | 0 | 0 | 0 | 1 Ref      |
| KX119206 | Unassigned | Unassigned | Unassigned | 101_0   | Clustered           | 32 VC_101_0  | 32 | 0.8826 | 1          | 0.8826 | 0 | 0 | 0 | 1 Ref      |
| KX129925 | Unassigned | Unassigned | Unassigned | 479_0   | Clustered           | 7 VC_479_0   | 7  | 0.3294 | 1          | 0.3294 | 0 | 0 | 0 | 1 Ref      |
| KX130726 | Unassigned | Unassigned | Unassigned | 398_0   | Clustered           | 51 VC_398_0  | 51 | 0.8741 | 1          | 0.8741 | 0 | 0 | 0 | 1 Ref      |
| KX130727 | Unassigned | Unassigned | Unassigned | 686_0   | Clustered           | 25 VC_686_0  | 25 | 0.5501 | 1          | 0.5501 | 0 | 0 | 0 | 0.96 Ref   |
| KX130861 | Unassigned | Unassigned | Unassigned | 290_114 | Clustered/Singleton | 1 VC_290_114 | 1  | 0      | 1          | 0      | 0 | 0 | 0 | 1 Ref      |
| KX130862 | Unassigned | Unassigned | Unassigned | 290_125 | Clustered/Singleton | 1 VC_290_125 | 1  | 0      | 1          | 0      | 0 | 0 | 0 | 1 Ref      |
| KX130863 | Unassigned | Unassigned | Unassigned | 198_0   | Clustered           | 2 VC_198_0   | 2  | 0.0086 | 0.95763473 | 0.0082 | 0 | 0 | 0 | 1 Ref      |
| KX130864 | Unassigned | Unassigned | Unassigned | 290_58  | Clustered/Singleton | 1 VC_290_58  | 1  | 0      | 1          | 0      | 0 | 0 | 0 | 1 Ref      |
| KX130865 | Unassigned | Unassigned | Unassigned | 293_16  | Clustered/Singleton | 1 VC_293_16  | 1  | 0      | 1          | 0      | 0 | 0 | 0 | 1 Ref      |
| KX130960 | Unassigned | Unassigned | Unassigned | 470_0   | Clustered           | 62 VC_470_0  | 62 | 0.902  | 1          | 0.902  | 0 | 0 | 0 | 1 Ref      |
| KX147096 | Unassigned | Unassigned | Unassigned | 134_2   | Clustered           | 17 VC_134_2  | 17 | 0.1715 | 1          | 0.1715 | 0 | 0 | 0 | 0.9853 Ref |
| KX147229 | Unassigned | Unassigned | Unassigned | 913_0   | Clustered           | 28 VC_913_0  | 28 | 0.6206 | 1          | 0.6206 | 0 | 0 | 0 | 0.9841 Ref |
| KX156152 | Unassigned | Unassigned | Unassigned | 913_0   | Clustered           | 28 VC_913_0  | 28 | 0.6206 | 1          | 0.6206 | 0 | 0 | 0 | 0.9841 Ref |
| KX159477 | Unassigned | Unassigned | Unassigned | 973_0   | Clustered           | 15 VC_973_0  | 15 | 1      | 0          | 0      | 0 | 0 | 0 | 1 Ref      |
| KX160204 | Unassigned | Unassigned | Unassigned | 268_0   | Clustered           | 10 VC_268_0  | 10 | 0.1417 | 1          | 0.1417 | 0 | 0 | 0 | 0.9333 Ref |
| KX160206 | Unassigned | Unassigned | Unassigned | 274_0   | Clustered           | 7 VC_274_0   | 7  | 0.3401 | 1          | 0.3401 | 0 | 0 | 0 | 1 Ref      |
| KX160209 | Unassigned | Unassigned | Unassigned | 274_0   | Clustered           | 7 VC_274_0   | 7  | 0.3401 | 1          | 0.3401 | 0 | 0 | 0 | 1 Ref      |
| KX160210 | Unassigned | Unassigned | Unassigned | 274_0   | Clustered           | 7 VC_274_0   | 7  | 0.3401 | 1          | 0.3401 | 0 | 0 | 0 | 1 Ref      |
| KX160211 | Unassigned | Unassigned | Unassigned | 274_0   | Clustered           | 7 VC_274_0   | 7  | 0.3401 | 1          | 0.3401 | 0 | 0 | 0 | 1 Ref      |
| KX160219 | Unassigned | Unassigned | Unassigned | 268_0   | Clustered           | 10 VC_268_0  | 10 | 0.1417 | 1          | 0.1417 | 0 | 0 | 0 | 0.9333 Ref |
| KX160220 | Unassigned | Unassigned | Unassigned | 268_0   | Clustered           | 10 VC_268_0  | 10 | 0.1417 | 1          | 0.1417 | 0 | 0 | 0 | 0.9333 Ref |
| KX171208 | Unassigned | Unassigned | Unassigned | 80_0    | Clustered           | 64 VC_80_0   | 64 | 0.418  | 1          | 0.418  | 0 | 0 | 0 | 0.7649 Ref |
| KX171209 | Unassigned | Unassigned | Unassigned | 862_0   | Clustered           | 29 VC_862_0  | 29 | 0.8594 | 1          | 0.8594 | 0 | 0 | 0 | 1 Ref      |
| KX171210 | Unassigned | Unassigned | Unassigned | 862_0   | Clustered           | 29 VC_862_0  | 29 | 0.8594 | 1          | 0.8594 | 0 | 0 | 0 | 1 Ref      |
| KX171211 | Unassigned | Unassigned | Unassigned | 135_9   | Clustered           | 3 VC_135_9   | 3  | 0.0098 | 0.98303301 | 0.0097 | 0 | 0 | 0 | 1 Ref      |
| KX171212 | Unassigned | Unassigned | Unassigned | 157_0   | Clustered           | 6 VC_157_0   | 6  | 0.0724 | 1          | 0.0724 | 0 | 0 | 0 | 1 Ref      |
| KX171213 | Unassigned | Unassigned | Unassigned | 157_0   | Clustered           | 6 VC_157_0   | 6  | 0.0724 | 1          | 0.0724 | 0 | 0 | 0 | 1 Ref      |
| KX179905 | Unassigned | Unassigned | Unassigned | 54_0    | Clustered           | 87 VC_54_0   | 87 | 0.9858 | 1          | 0.9858 | 0 | 0 | 0 | 1 Ref      |
| KX181651 | Unassigned | Unassigned | Unassigned | 183_0   | Clustered           | 5 VC_183_0   | 5  | 0.7449 | 0.99885646 | 0.744  | 0 | 0 | 0 | 1 Ref      |
| KX190832 | Unassigned | Unassigned | Unassigned | 667_0   | Clustered           | 12 VC_667_0  | 12 | 0.2907 | 0.99999999 | 0.2907 | 0 | 0 | 0 | 1 Ref      |
| KX190833 | Unassigned | Unassigned | Unassigned | 746_0   | Clustered           | 2 VC_746_0   | 2  | 0.3667 | 0.95002548 | 0.3484 | 0 | 0 | 0 | 1 Ref      |
| KX190834 | Unassigned | Unassigned | Unassigned | 853_0   | Clustered           | 5 VC_853_0   | 5  | 0.8735 | 0.99999832 | 0.8735 | 0 | 0 | 0 | 1 Ref      |



|          |            |            |            |        |           |              |     |        |            |        |   |   |   |            |
|----------|------------|------------|------------|--------|-----------|--------------|-----|--------|------------|--------|---|---|---|------------|
| KX190835 | Unassigned | Unassigned | Unassigned | 20_0   | Clustered | 5 VC_20_0    | 5   | 0.4268 | 0.9999994  | 0.4268 | 0 | 0 | 0 | 1 Ref      |
| KX196154 | Unassigned | Unassigned | Unassigned | 515_0  | Clustered | 8 VC_515_0   | 8   | 0.3973 | 1          | 0.3973 | 0 | 0 | 0 | 1 Ref      |
| KX198613 | Unassigned | Unassigned | Unassigned | 172_0  | Clustered | 26 VC_172_0  | 26  | 0.7909 | 1          | 0.7909 | 0 | 0 | 0 | 1 Ref      |
| KX198614 | Unassigned | Unassigned | Unassigned | 821_0  | Clustered | 5 VC_821_0   | 5   | 0.2385 | 0.9999997  | 0.2385 | 0 | 0 | 0 | 1 Ref      |
| KX198615 | Unassigned | Unassigned | Unassigned | 935_1  | Clustered | 4 VC_935_1   | 4   | 0.1471 | 0.99997723 | 0.1471 | 0 | 0 | 0 | 1 Ref      |
| KX211991 | Unassigned | Unassigned | Unassigned | 113_0  | Clustered | 91 VC_113_0  | 91  | 0.9584 | 1          | 0.9584 | 0 | 0 | 0 | 1 Ref      |
| KX223815 | Unassigned | Unassigned | Unassigned | 650_1  | Clustered | 6 VC_650_1   | 6   | 0.4186 | 1          | 0.4186 | 0 | 0 | 0 | 1 Ref      |
| KX227757 | Unassigned | Unassigned | Unassigned | 673_0  | Clustered | 4 VC_673_0   | 4   | 0.2891 | 0.99998263 | 0.2891 | 0 | 0 | 0 | 1 Ref      |
| KX227758 | Unassigned | Unassigned | Unassigned | 671_0  | Clustered | 4 VC_671_0   | 4   | 0.4756 | 0.99998076 | 0.4756 | 0 | 0 | 0 | 1 Ref      |
| KX227759 | Unassigned | Unassigned | Unassigned | 671_0  | Clustered | 4 VC_671_0   | 4   | 0.4756 | 0.99998076 | 0.4756 | 0 | 0 | 0 | 1 Ref      |
| KX227760 | Unassigned | Unassigned | Unassigned | 673_0  | Clustered | 4 VC_673_0   | 4   | 0.2891 | 0.99998263 | 0.2891 | 0 | 0 | 0 | 1 Ref      |
| KX229736 | Unassigned | Unassigned | Unassigned | 868_0  | Clustered | 27 VC_868_0  | 27  | 0.9372 | 1          | 0.9372 | 0 | 0 | 0 | 1 Ref      |
| KX231828 | Unassigned | Unassigned | Unassigned | 127_0  | Clustered | 17 VC_127_0  | 17  | 0.9222 | 1          | 0.9222 | 0 | 0 | 0 | 1 Ref      |
| KX231829 | Unassigned | Unassigned | Unassigned | 492_0  | Clustered | 20 VC_492_0  | 20  | 0.7887 | 1          | 0.7887 | 0 | 0 | 0 | 1 Ref      |
| KX232515 | Unassigned | Unassigned | Unassigned | 7_0    | Clustered | 28 VC_7_0    | 28  | 0.389  | 1          | 0.389  | 0 | 0 | 0 | 0.9947 Ref |
| KX236333 | Unassigned | Unassigned | Unassigned | 868_0  | Clustered | 27 VC_868_0  | 27  | 0.9372 | 1          | 0.9372 | 0 | 0 | 0 | 1 Ref      |
| KX237514 | Unassigned | Unassigned | Unassigned | 113_0  | Clustered | 91 VC_113_0  | 91  | 0.9584 | 1          | 0.9584 | 0 | 0 | 0 | 1 Ref      |
| KX237515 | Unassigned | Unassigned | Unassigned | 971_0  | Clustered | 40 VC_971_0  | 40  | 0.6793 | 1          | 0.6793 | 0 | 0 | 0 | 0.9359 Ref |
| KX237516 | Unassigned | Unassigned | Unassigned | 125_0  | Clustered | 23 VC_125_0  | 23  | 0.8163 | 1          | 0.8163 | 0 | 0 | 0 | 1 Ref      |
| KX241618 | Unassigned | Unassigned | Unassigned | 175_0  | Clustered | 20 VC_175_0  | 20  | 0.7504 | 1          | 0.7504 | 0 | 0 | 0 | 1 Ref      |
| KX245012 | Unassigned | Unassigned | Unassigned | 135_30 | Clustered | 2 VC_135_30  | 2   | 0.0052 | 0.87577187 | 0.0045 | 0 | 0 | 0 | 1 Ref      |
| KX245013 | Unassigned | Unassigned | Unassigned | 654_0  | Clustered | 115 VC_654_0 | 115 | 0.7303 | 1          | 0.7303 | 0 | 0 | 0 | 0.8764 Ref |
| KX245890 | Unassigned | Unassigned | Unassigned | 687_1  | Clustered | 10 VC_687_1  | 10  | 0.1263 | 1          | 0.1263 | 0 | 0 | 0 | 0.9778 Ref |
| KX257490 | Unassigned | Unassigned | Unassigned | 1066_0 | Clustered | 2 VC_1066_0  | 2   | 0.2951 | 0.81445332 | 0.2404 | 0 | 0 | 0 | 1 Ref      |
| KX258185 | Unassigned | Unassigned | Unassigned | 509_0  | Clustered | 36 VC_509_0  | 36  | 0.5291 | 1          | 0.5291 | 0 | 0 | 0 | 0.9714 Ref |
| KX266300 | Unassigned | Unassigned | Unassigned | 373_0  | Clustered | 358 VC_373_0 | 358 | 0.9614 | 1          | 0.9614 | 0 | 0 | 0 | 1 Ref      |
| KX266301 | Unassigned | Unassigned | Unassigned | 373_0  | Clustered | 358 VC_373_0 | 358 | 0.9614 | 1          | 0.9614 | 0 | 0 | 0 | 1 Ref      |
| KX266302 | Unassigned | Unassigned | Unassigned | 373_0  | Clustered | 358 VC_373_0 | 358 | 0.9614 | 1          | 0.9614 | 0 | 0 | 0 | 1 Ref      |
| KX266303 | Unassigned | Unassigned | Unassigned | 373_0  | Clustered | 358 VC_373_0 | 358 | 0.9614 | 1          | 0.9614 | 0 | 0 | 0 | 1 Ref      |
| KX266304 | Unassigned | Unassigned | Unassigned | 373_0  | Clustered | 358 VC_373_0 | 358 | 0.9614 | 1          | 0.9614 | 0 | 0 | 0 | 1 Ref      |
| KX266305 | Unassigned | Unassigned | Unassigned | 373_0  | Clustered | 358 VC_373_0 | 358 | 0.9614 | 1          | 0.9614 | 0 | 0 | 0 | 1 Ref      |
| KX266306 | Unassigned | Unassigned | Unassigned | 373_0  | Clustered | 358 VC_373_0 | 358 | 0.9614 | 1          | 0.9614 | 0 | 0 | 0 | 1 Ref      |
| KX266307 | Unassigned | Unassigned | Unassigned | 373_0  | Clustered | 358 VC_373_0 | 358 | 0.9614 | 1          | 0.9614 | 0 | 0 | 0 | 1 Ref      |
| KX266308 | Unassigned | Unassigned | Unassigned | 373_0  | Clustered | 358 VC_373_0 | 358 | 0.9614 | 1          | 0.9614 | 0 | 0 | 0 | 1 Ref      |
| KX266309 | Unassigned | Unassigned | Unassigned | 373_0  | Clustered | 358 VC_373_0 | 358 | 0.9614 | 1          | 0.9614 | 0 | 0 | 0 | 1 Ref      |
| KX266310 | Unassigned | Unassigned | Unassigned | 373_0  | Clustered | 358 VC_373_0 | 358 | 0.9614 | 1          | 0.9614 | 0 | 0 | 0 | 1 Ref      |
| KX266311 | Unassigned | Unassigned | Unassigned | 373_0  | Clustered | 358 VC_373_0 | 358 | 0.9614 | 1          | 0.9614 | 0 | 0 | 0 | 1 Ref      |
| KX266312 | Unassigned | Unassigned | Unassigned | 373_0  | Clustered | 358 VC_373_0 | 358 | 0.9614 | 1          | 0.9614 | 0 | 0 | 0 | 1 Ref      |
| KX266313 | Unassigned | Unassigned | Unassigned | 373_0  | Clustered | 358 VC_373_0 | 358 | 0.9614 | 1          | 0.9614 | 0 | 0 | 0 | 1 Ref      |
| KX266314 | Unassigned | Unassigned | Unassigned | 373_0  | Clustered | 358 VC_373_0 | 358 | 0.9614 | 1          | 0.9614 | 0 | 0 | 0 | 1 Ref      |
| KX266315 | Unassigned | Unassigned | Unassigned | 373_0  | Clustered | 358 VC_373_0 | 358 | 0.9614 | 1          | 0.9614 | 0 | 0 | 0 | 1 Ref      |
| KX266316 | Unassigned | Unassigned | Unassigned | 373_0  | Clustered | 358 VC_373_0 | 358 | 0.9614 | 1          | 0.9614 | 0 | 0 | 0 | 1 Ref      |
| KX266317 | Unassigned | Unassigned | Unassigned | 373_0  | Clustered | 358 VC_373_0 | 358 | 0.9614 | 1          | 0.9614 | 0 | 0 | 0 | 1 Ref      |
| KX266318 | Unassigned | Unassigned | Unassigned | 373_0  | Clustered | 358 VC_373_0 | 358 | 0.9614 | 1          | 0.9614 | 0 | 0 | 0 | 1 Ref      |
| KX266319 | Unassigned | Unassigned | Unassigned | 373_0  | Clustered | 358 VC_373_0 | 358 | 0.9614 | 1          | 0.9614 | 0 | 0 | 0 | 1 Ref      |
| KX266320 | Unassigned | Unassigned | Unassigned | 373_0  | Clustered | 358 VC_373_0 | 358 | 0.9614 | 1          | 0.9614 | 0 | 0 | 0 | 1 Ref      |
| KX266321 | Unassigned | Unassigned | Unassigned | 373_0  | Clustered | 358 VC_373_0 | 358 | 0.9614 | 1          | 0.9614 | 0 | 0 | 0 | 1 Ref      |
| KX266322 | Unassigned | Unassigned | Unassigned | 373_0  | Clustered | 358 VC_373_0 | 358 | 0.9614 | 1          | 0.9614 | 0 | 0 | 0 | 1 Ref      |
| KX266323 | Unassigned | Unassigned | Unassigned | 373_0  | Clustered | 358 VC_373_0 | 358 | 0.9614 | 1          | 0.9614 | 0 | 0 | 0 | 1 Ref      |
| KX266324 | Unassigned | Unassigned | Unassigned | 373_0  | Clustered | 358 VC_373_0 | 358 | 0.9614 | 1          | 0.9614 | 0 | 0 | 0 | 1 Ref      |
| KX266325 | Unassigned | Unassigned | Unassigned | 373_0  | Clustered | 358 VC_373_0 | 358 | 0.9614 | 1          | 0.9614 | 0 | 0 | 0 | 1 Ref      |
| KX266326 | Unassigned | Unassigned | Unassigned | 373_0  | Clustered | 358 VC_373_0 | 358 | 0.9614 | 1          | 0.9614 | 0 | 0 | 0 | 1 Ref      |
| KX266327 | Unassigned | Unassigned | Unassigned | 373_0  | Clustered | 358 VC_373_0 | 358 | 0.9614 | 1          | 0.9614 | 0 | 0 | 0 | 1 Ref      |
| KX266328 | Unassigned | Unassigned | Unassigned | 373_0  | Clustered | 358 VC_373_0 | 358 | 0.9614 | 1          | 0.9614 | 0 | 0 | 0 | 1 Ref      |
| KX266329 | Unassigned | Unassigned | Unassigned | 373_0  | Clustered | 358 VC_373_0 | 358 | 0.9614 | 1          | 0.9614 | 0 | 0 | 0 | 1 Ref      |
| KX266330 | Unassigned | Unassigned | Unassigned | 373_0  | Clustered | 358 VC_373_0 | 358 | 0.9614 | 1          | 0.9614 | 0 | 0 | 0 | 1 Ref      |
| KX266331 | Unassigned | Unassigned | Unassigned | 373_0  | Clustered | 358 VC_373_0 | 358 | 0.9614 | 1          | 0.9614 | 0 | 0 | 0 | 1 Ref      |
| KX266332 | Unassigned | Unassigned | Unassigned | 373_0  | Clustered | 358 VC_373_0 | 358 | 0.9614 | 1          | 0.9614 | 0 | 0 | 0 | 1 Ref      |
| KX266333 | Unassigned | Unassigned | Unassigned | 373_0  | Clustered | 358 VC_373_0 | 358 | 0.9614 | 1          | 0.9614 | 0 | 0 | 0 | 1 Ref      |
| KX266334 | Unassigned | Unassigned | Unassigned | 373_0  | Clustered | 358 VC_373_0 | 358 | 0.9614 | 1          | 0.9614 | 0 | 0 | 0 | 1 Ref      |
| KX266335 | Unassigned | Unassigned | Unassigned | 373_0  | Clustered | 358 VC_373_0 | 358 | 0.9614 | 1          | 0.9614 | 0 | 0 | 0 | 1 Ref      |
| KX266336 | Unassigned | Unassigned | Unassigned | 373_0  | Clustered | 358 VC_373_0 | 358 | 0.9614 | 1          | 0.9614 | 0 | 0 | 0 | 1 Ref      |
| KX266337 | Unassigned | Unassigned | Unassigned | 373_0  | Clustered | 358 VC_373_0 | 358 | 0.9614 | 1          | 0.9614 | 0 | 0 | 0 | 1 Ref      |
| KX266338 | Unassigned | Unassigned | Unassigned | 373_0  | Clustered | 358 VC_373_0 | 358 | 0.9614 | 1          | 0.9614 | 0 | 0 | 0 | 1 Ref      |
| KX266339 | Unassigned | Unassigned | Unassigned | 373_0  | Clustered | 358 VC_373_0 | 358 | 0.9614 | 1          | 0.9614 | 0 | 0 | 0 | 1 Ref      |
| KX266340 | Unassigned | Unassigned | Unassigned | 373_0  | Clustered | 358 VC_373_0 | 358 | 0.9614 | 1          | 0.9614 | 0 | 0 | 0 | 1 Ref      |
| KX266341 | Unassigned | Unassigned | Unassigned | 373_0  | Clustered | 358 VC_373_0 | 358 | 0.9614 | 1          | 0.9614 | 0 | 0 | 0 | 1 Ref      |
| KX266342 | Unassigned | Unassigned | Unassigned | 373_0  | Clustered | 358 VC_373_0 | 358 | 0.9614 | 1          | 0.9614 | 0 | 0 | 0 | 1 Ref      |
| KX266343 | Unassigned | Unassigned | Unassigned | 373_0  | Clustered | 358 VC_373_0 | 358 | 0.9614 | 1          | 0.9614 | 0 | 0 | 0 | 1 Ref      |
| KX266344 | Unassigned | Unassigned | Unassigned | 373_0  | Clustered | 358 VC_373_0 | 358 | 0.9614 | 1          | 0.9614 | 0 | 0 | 0 | 1 Ref      |
| KX266345 | Unassigned | Unassigned | Unassigned | 373_0  | Clustered | 358 VC_373_0 | 358 | 0.9614 | 1          | 0.9614 | 0 | 0 | 0 | 1 Ref      |
| KX266346 | Unassigned | Unassigned | Unassigned | 373_0  | Clustered | 358 VC_373_0 | 358 | 0.9614 | 1          | 0.9614 | 0 | 0 | 0 | 1 Ref      |
| KX266347 | Unassigned | Unassigned | Unassigned | 373_0  | Clustered | 358 VC_373_0 | 358 | 0.9614 | 1          | 0.9614 | 0 | 0 | 0 | 1 Ref      |
| KX266348 | Unassigned | Unassigned | Unassigned | 373_0  | Clustered | 358 VC_373_0 | 358 | 0.9614 | 1          | 0.9614 | 0 | 0 | 0 | 1 Ref      |
| KX266349 | Unassigned | Unassigned | Unassigned | 373_0  | Clustered | 358 VC_373_0 | 358 | 0.9614 | 1          | 0.9614 | 0 | 0 | 0 | 1 Ref      |
| KX266350 | Unassigned | Unassigned | Unassigned | 373_0  | Clustered | 358 VC_373_0 | 358 | 0.9614 | 1          | 0.9614 | 0 | 0 | 0 | 1 Ref      |
| KX266351 | Unassigned | Unassigned | Unassigned | 373_0  | Clustered | 358 VC_373_0 | 358 | 0.9614 | 1          | 0.9614 | 0 | 0 | 0 | 1 Ref      |
| KX266352 | Unassigned | Unassigned | Unassigned | 373_0  | Clustered | 358 VC_373_0 | 358 | 0.9614 | 1          | 0.9614 | 0 | 0 | 0 | 1 Ref      |
| KX266353 | Unassigned | Unassigned | Unassigned | 373_0  | Clustered | 358 VC_373_0 | 358 | 0.9614 | 1          | 0.9614 | 0 | 0 | 0 | 1 Ref      |
| KX266354 | Unassigned | Unassigned | Unassigned | 373_0  | Clustered | 358 VC_373_0 | 358 | 0.9614 | 1          | 0.9614 | 0 | 0 | 0 | 1 Ref      |
| KX266355 | Unassigned | Unassigned | Unassigned | 373_0  | Clustered | 358 VC_373_0 | 358 | 0.9614 | 1          | 0.9614 | 0 | 0 | 0 | 1 Ref      |



[illegible]



[illegible]



[illegible]



[illegible]



|          |            |            |            |        |                     |              |     |        |            |        |   |   |   |            |
|----------|------------|------------|------------|--------|---------------------|--------------|-----|--------|------------|--------|---|---|---|------------|
| KX349261 | Unassigned | Unassigned | Unassigned | 681_0  | Clustered           | 62 VC_681_0  | 62  | 0.693  | 1          | 0.693  | 0 | 0 | 0 | 1 Ref      |
| KX349262 | Unassigned | Unassigned | Unassigned | 681_0  | Clustered           | 62 VC_681_0  | 62  | 0.693  | 1          | 0.693  | 0 | 0 | 0 | 1 Ref      |
| KX349263 | Unassigned | Unassigned | Unassigned | 681_0  | Clustered           | 62 VC_681_0  | 62  | 0.693  | 1          | 0.693  | 0 | 0 | 0 | 1 Ref      |
| KX349264 | Unassigned | Unassigned | Unassigned | 681_0  | Clustered           | 62 VC_681_0  | 62  | 0.693  | 1          | 0.693  | 0 | 0 | 0 | 1 Ref      |
| KX349265 | Unassigned | Unassigned | Unassigned | 681_0  | Clustered           | 62 VC_681_0  | 62  | 0.693  | 1          | 0.693  | 0 | 0 | 0 | 1 Ref      |
| KX349266 | Unassigned | Unassigned | Unassigned | 681_0  | Clustered           | 62 VC_681_0  | 62  | 0.693  | 1          | 0.693  | 0 | 0 | 0 | 1 Ref      |
| KX349267 | Unassigned | Unassigned | Unassigned | 681_0  | Clustered           | 62 VC_681_0  | 62  | 0.693  | 1          | 0.693  | 0 | 0 | 0 | 1 Ref      |
| KX349268 | Unassigned | Unassigned | Unassigned | 681_0  | Clustered           | 62 VC_681_0  | 62  | 0.693  | 1          | 0.693  | 0 | 0 | 0 | 1 Ref      |
| KX349269 | Unassigned | Unassigned | Unassigned | 681_0  | Clustered           | 62 VC_681_0  | 62  | 0.693  | 1          | 0.693  | 0 | 0 | 0 | 1 Ref      |
| KX349270 | Unassigned | Unassigned | Unassigned | 681_0  | Clustered           | 62 VC_681_0  | 62  | 0.693  | 1          | 0.693  | 0 | 0 | 0 | 1 Ref      |
| KX349271 | Unassigned | Unassigned | Unassigned | 681_0  | Clustered           | 62 VC_681_0  | 62  | 0.693  | 1          | 0.693  | 0 | 0 | 0 | 1 Ref      |
| KX349272 | Unassigned | Unassigned | Unassigned | 681_0  | Clustered           | 62 VC_681_0  | 62  | 0.693  | 1          | 0.693  | 0 | 0 | 0 | 1 Ref      |
| KX349273 | Unassigned | Unassigned | Unassigned | 681_0  | Clustered           | 62 VC_681_0  | 62  | 0.693  | 1          | 0.693  | 0 | 0 | 0 | 1 Ref      |
| KX349274 | Unassigned | Unassigned | Unassigned | 681_0  | Clustered           | 62 VC_681_0  | 62  | 0.693  | 1          | 0.693  | 0 | 0 | 0 | 1 Ref      |
| KX349275 | Unassigned | Unassigned | Unassigned | 681_0  | Clustered           | 62 VC_681_0  | 62  | 0.693  | 1          | 0.693  | 0 | 0 | 0 | 1 Ref      |
| KX349276 | Unassigned | Unassigned | Unassigned | 681_0  | Clustered           | 62 VC_681_0  | 62  | 0.693  | 1          | 0.693  | 0 | 0 | 0 | 1 Ref      |
| KX349277 | Unassigned | Unassigned | Unassigned | 681_0  | Clustered           | 62 VC_681_0  | 62  | 0.693  | 1          | 0.693  | 0 | 0 | 0 | 1 Ref      |
| KX349278 | Unassigned | Unassigned | Unassigned | 681_0  | Clustered           | 62 VC_681_0  | 62  | 0.693  | 1          | 0.693  | 0 | 0 | 0 | 1 Ref      |
| KX349279 | Unassigned | Unassigned | Unassigned | 681_0  | Clustered           | 62 VC_681_0  | 62  | 0.693  | 1          | 0.693  | 0 | 0 | 0 | 1 Ref      |
| KX349280 | Unassigned | Unassigned | Unassigned | 681_0  | Clustered           | 62 VC_681_0  | 62  | 0.693  | 1          | 0.693  | 0 | 0 | 0 | 1 Ref      |
| KX349281 | Unassigned | Unassigned | Unassigned | 681_0  | Clustered           | 62 VC_681_0  | 62  | 0.693  | 1          | 0.693  | 0 | 0 | 0 | 1 Ref      |
| KX349282 | Unassigned | Unassigned | Unassigned | 681_0  | Clustered           | 62 VC_681_0  | 62  | 0.693  | 1          | 0.693  | 0 | 0 | 0 | 1 Ref      |
| KX349283 | Unassigned | Unassigned | Unassigned | 681_0  | Clustered           | 62 VC_681_0  | 62  | 0.693  | 1          | 0.693  | 0 | 0 | 0 | 1 Ref      |
| KX349284 | Unassigned | Unassigned | Unassigned | 681_0  | Clustered           | 62 VC_681_0  | 62  | 0.693  | 1          | 0.693  | 0 | 0 | 0 | 1 Ref      |
| KX349291 | Unassigned | Unassigned | Unassigned | 447_4  | Clustered           | 9 VC_447_4   | 9   | 0.127  | 1          | 0.127  | 0 | 0 | 0 | 1 Ref      |
| KX349292 | Unassigned | Unassigned | Unassigned | 447_4  | Clustered           | 9 VC_447_4   | 9   | 0.127  | 1          | 0.127  | 0 | 0 | 0 | 1 Ref      |
| KX349293 | Unassigned | Unassigned | Unassigned | 447_4  | Clustered           | 9 VC_447_4   | 9   | 0.127  | 1          | 0.127  | 0 | 0 | 0 | 1 Ref      |
| KX349294 | Unassigned | Unassigned | Unassigned | 447_4  | Clustered           | 9 VC_447_4   | 9   | 0.127  | 1          | 0.127  | 0 | 0 | 0 | 1 Ref      |
| KX349295 | Unassigned | Unassigned | Unassigned | 447_4  | Clustered           | 9 VC_447_4   | 9   | 0.127  | 1          | 0.127  | 0 | 0 | 0 | 1 Ref      |
| KX349296 | Unassigned | Unassigned | Unassigned | 447_4  | Clustered           | 9 VC_447_4   | 9   | 0.127  | 1          | 0.127  | 0 | 0 | 0 | 1 Ref      |
| KX349297 | Unassigned | Unassigned | Unassigned | 447_4  | Clustered           | 9 VC_447_4   | 9   | 0.127  | 1          | 0.127  | 0 | 0 | 0 | 1 Ref      |
| KX349899 | Unassigned | Unassigned | Unassigned | 843_0  | Clustered           | 20 VC_843_0  | 20  | 0.9621 | 1          | 0.9621 | 0 | 0 | 0 | 1 Ref      |
| KX349900 | Unassigned | Unassigned | Unassigned | 843_0  | Clustered           | 20 VC_843_0  | 20  | 0.9621 | 1          | 0.9621 | 0 | 0 | 0 | 1 Ref      |
| KX349901 | Unassigned | Unassigned | Unassigned | 843_0  | Clustered           | 20 VC_843_0  | 20  | 0.9621 | 1          | 0.9621 | 0 | 0 | 0 | 1 Ref      |
| KX349902 | Unassigned | Unassigned | Unassigned | 913_0  | Clustered           | 28 VC_913_0  | 28  | 0.6206 | 1          | 0.6206 | 0 | 0 | 0 | 0.9841 Ref |
| KX349903 | Unassigned | Unassigned | Unassigned | 913_0  | Clustered           | 28 VC_913_0  | 28  | 0.6206 | 1          | 0.6206 | 0 | 0 | 0 | 0.9841 Ref |
| KX365747 | Unassigned | Unassigned | Unassigned | 119_0  | Clustered           | 9 VC_119_0   | 9   | 0.9977 | 0.98988637 | 0.9876 | 0 | 0 | 0 | 1 Ref      |
| KX365748 | Unassigned | Unassigned | Unassigned | 926_0  | Clustered           | 2 VC_926_0   | 2   | 0.2769 | 0.94251254 | 0.261  | 0 | 0 | 0 | 1 Ref      |
| KX369583 | Unassigned | Unassigned | Unassigned | 579_23 | Clustered/Singleton | 1 VC_579_23  | 1   | 0      | 1          | 0      | 0 | 0 | 0 | 1 Ref      |
| KX369584 | Unassigned | Unassigned | Unassigned | 335_29 | Clustered/Singleton | 1 VC_335_29  | 1   | 0      | 1          | 0      | 0 | 0 | 0 | 1 Ref      |
| KX369585 | Unassigned | Unassigned | Unassigned | 384_16 | Clustered           | 42 VC_384_16 | 42  | 0.134  | 1          | 0.134  | 0 | 0 | 0 | 0.7282 Ref |
| KX369586 | Unassigned | Unassigned | Unassigned | 335_4  | Clustered/Singleton | 1 VC_335_4   | 1   | 0      | 1          | 0      | 0 | 0 | 0 | 1 Ref      |
| KX373685 | Unassigned | Unassigned | Unassigned | 706_0  | Clustered           | 52 VC_706_0  | 52  | 0.9787 | 1          | 0.9787 | 0 | 0 | 0 | 1 Ref      |
| KX373686 | Unassigned | Unassigned | Unassigned | 706_0  | Clustered           | 52 VC_706_0  | 52  | 0.9787 | 1          | 0.9787 | 0 | 0 | 0 | 1 Ref      |
| KX373687 | Unassigned | Unassigned | Unassigned | 706_0  | Clustered           | 52 VC_706_0  | 52  | 0.9787 | 1          | 0.9787 | 0 | 0 | 0 | 1 Ref      |
| KX373688 | Unassigned | Unassigned | Unassigned | 706_0  | Clustered           | 52 VC_706_0  | 52  | 0.9787 | 1          | 0.9787 | 0 | 0 | 0 | 1 Ref      |
| KX373689 | Unassigned | Unassigned | Unassigned | 706_0  | Clustered           | 52 VC_706_0  | 52  | 0.9787 | 1          | 0.9787 | 0 | 0 | 0 | 1 Ref      |
| KX373690 | Unassigned | Unassigned | Unassigned | 706_0  | Clustered           | 52 VC_706_0  | 52  | 0.9787 | 1          | 0.9787 | 0 | 0 | 0 | 1 Ref      |
| KX373691 | Unassigned | Unassigned | Unassigned | 706_0  | Clustered           | 52 VC_706_0  | 52  | 0.9787 | 1          | 0.9787 | 0 | 0 | 0 | 1 Ref      |
| KX373692 | Unassigned | Unassigned | Unassigned | 706_0  | Clustered           | 52 VC_706_0  | 52  | 0.9787 | 1          | 0.9787 | 0 | 0 | 0 | 1 Ref      |
| KX375815 | Unassigned | Unassigned | Unassigned | 230_0  | Clustered           | 38 VC_230_0  | 38  | 0.9076 | 1          | 0.9076 | 0 | 0 | 0 | 1 Ref      |
| KX377933 | Unassigned | Unassigned | Unassigned | 340_3  | Clustered           | 24 VC_340_3  | 24  | 0.1205 | 1          | 0.1205 | 0 | 0 | 0 | 0.7283 Ref |
| KX379667 | Unassigned | Unassigned | Unassigned | 210_0  | Clustered           | 105 VC_210_0 | 105 | 0.4076 | 1          | 0.4076 | 0 | 0 | 0 | 0.7766 Ref |
| KX379668 | Unassigned | Unassigned | Unassigned | 210_0  | Clustered           | 105 VC_210_0 | 105 | 0.4076 | 1          | 0.4076 | 0 | 0 | 0 | 0.7766 Ref |
| KX379670 | Unassigned | Unassigned | Unassigned | 210_0  | Clustered           | 105 VC_210_0 | 105 | 0.4076 | 1          | 0.4076 | 0 | 0 | 0 | 0.7766 Ref |
| KX379671 | Unassigned | Unassigned | Unassigned | 210_0  | Clustered           | 105 VC_210_0 | 105 | 0.4076 | 1          | 0.4076 | 0 | 0 | 0 | 0.7766 Ref |
| KX397364 | Unassigned | Unassigned | Unassigned | 994_4  | Clustered           | 3 VC_994_4   | 3   | 0.0236 | 0.75814415 | 0.0179 | 0 | 0 | 0 | 1 Ref      |
| KX397365 | Unassigned | Unassigned | Unassigned | 994_2  | Clustered           | 5 VC_994_2   | 5   | 0.0483 | 0.88370509 | 0.0427 | 0 | 0 | 0 | 1 Ref      |
| KX397366 | Unassigned | Unassigned | Unassigned | 994_2  | Clustered           | 5 VC_994_2   | 5   | 0.0483 | 0.88370509 | 0.0427 | 0 | 0 | 0 | 1 Ref      |
| KX397367 | Unassigned | Unassigned | Unassigned | 994_0  | Clustered           | 5 VC_994_0   | 5   | 0.0495 | 0.99983811 | 0.0494 | 0 | 0 | 0 | 1 Ref      |
| KX397368 | Unassigned | Unassigned | Unassigned | 994_1  | Clustered           | 8 VC_994_1   | 8   | 0.0877 | 0.92136649 | 0.0808 | 0 | 0 | 0 | 1 Ref      |
| KX397369 | Unassigned | Unassigned | Unassigned | 994_3  | Clustered           | 3 VC_994_3   | 3   | 0.0236 | 0.75215638 | 0.0178 | 0 | 0 | 0 | 1 Ref      |
| KX397370 | Unassigned | Unassigned | Unassigned | 994_1  | Clustered           | 8 VC_994_1   | 8   | 0.0877 | 0.92136649 | 0.0808 | 0 | 0 | 0 | 1 Ref      |
| KX397371 | Unassigned | Unassigned | Unassigned | 994_1  | Clustered           | 8 VC_994_1   | 8   | 0.0877 | 0.92136649 | 0.0808 | 0 | 0 | 0 | 1 Ref      |
| KX397372 | Unassigned | Unassigned | Unassigned | 994_0  | Clustered           | 5 VC_994_0   | 5   | 0.0495 | 0.99983811 | 0.0494 | 0 | 0 | 0 | 1 Ref      |
| KX397373 | Unassigned | Unassigned | Unassigned | 994_4  | Clustered           | 3 VC_994_4   | 3   | 0.0236 | 0.75814415 | 0.0179 | 0 | 0 | 0 | 1 Ref      |
| KX405002 | Unassigned | Unassigned | Unassigned | 654_0  | Clustered           | 115 VC_654_0 | 115 | 0.7303 | 1          | 0.7303 | 0 | 0 | 0 | 0.8764 Ref |
| KX405003 | Unassigned | Unassigned | Unassigned | 340_16 | Clustered           | 4 VC_340_16  | 4   | 0.0157 | 0.99998807 | 0.0157 | 0 | 0 | 0 | 1 Ref      |
| KX431559 | Unassigned | Unassigned | Unassigned | 687_0  | Clustered           | 21 VC_687_0  | 21  | 0.3608 | 1          | 0.3608 | 0 | 0 | 0 | 1 Ref      |
| KX431560 | Unassigned | Unassigned | Unassigned | 687_0  | Clustered           | 21 VC_687_0  | 21  | 0.3608 | 1          | 0.3608 | 0 | 0 | 0 | 1 Ref      |
| KX431888 | Unassigned | Unassigned | Unassigned | 132_0  | Clustered           | 19 VC_132_0  | 19  | 0.6051 | 1          | 0.6051 | 0 | 0 | 0 | 1 Ref      |
| KX438380 | Unassigned | Unassigned | Unassigned | 135_14 | Clustered           | 3 VC_135_14  | 3   | 0.0101 | 0.96146265 | 0.0097 | 0 | 0 | 0 | 1 Ref      |
| KX443326 | Unassigned | Unassigned | Unassigned | 783_0  | Clustered           | 67 VC_783_0  | 67  | 0.8945 | 1          | 0.8945 | 0 | 0 | 0 | 1 Ref      |
| KX443552 | Unassigned | Unassigned | Unassigned | 687_0  | Clustered           | 21 VC_687_0  | 21  | 0.3608 | 1          | 0.3608 | 0 | 0 | 0 | 1 Ref      |
| KX443695 | Unassigned | Unassigned | Unassigned | 985_0  | Clustered           | 38 VC_985_0  | 38  | 0.9334 | 1          | 0.9334 | 0 | 0 | 0 | 1 Ref      |
| KX443696 | Unassigned | Unassigned | Unassigned | 526_0  | Clustered           | 32 VC_526_0  | 32  | 0.9037 | 1          | 0.9037 | 0 | 0 | 0 | 1 Ref      |
| KX449361 | Unassigned | Unassigned | Unassigned | 132_0  | Clustered           | 19 VC_132_0  | 19  | 0.6051 | 1          | 0.6051 | 0 | 0 | 0 | 1 Ref      |
| KX449362 | Unassigned | Unassigned | Unassigned | 132_0  | Clustered           | 19 VC_132_0  | 19  | 0.6051 | 1          | 0.6051 | 0 | 0 | 0 | 1 Ref      |
| KX449363 | Unassigned | Unassigned | Unassigned | 132_0  | Clustered           | 19 VC_132_0  | 19  | 0.6051 | 1          | 0.6051 | 0 | 0 | 0 | 1 Ref      |
| KX452695 | Unassigned | Unassigned | Unassigned | 601_3  | Clustered           | 12 VC_601_3  | 12  | 0.2339 | 1          | 0.2339 | 0 | 0 | 0 | 0.8636 Ref |
| KX452696 | Unassigned | Unassigned | Unassigned | 398_0  | Clustered           | 51 VC_398_0  | 51  | 0.8741 | 1          | 0.8741 | 0 | 0 | 0 | 1 Ref      |



|          |            |            |            |         |                     |               |     |        |            |        |   |   |   |            |
|----------|------------|------------|------------|---------|---------------------|---------------|-----|--------|------------|--------|---|---|---|------------|
| KX452697 | Unassigned | Unassigned | Unassigned | 134_1   | Clustered           | 4 VC_134_1    | 4   | 0.0354 | 0.99998777 | 0.0354 | 0 | 0 | 0 | 1 Ref      |
| KX452698 | Unassigned | Unassigned | Unassigned | 290_143 | Clustered/Singleton | 1 VC_290_143  | 1   | 0      | 1          | 0      | 0 | 0 | 0 | 1 Ref      |
| KX452699 | Unassigned | Unassigned | Unassigned | 611_0   | Clustered           | 50 VC_611_0   | 50  | 0.7306 | 1          | 0.7306 | 0 | 0 | 0 | 1 Ref      |
| KX452700 | Unassigned | Unassigned | Unassigned | 611_0   | Clustered           | 50 VC_611_0   | 50  | 0.7306 | 1          | 0.7306 | 0 | 0 | 0 | 1 Ref      |
| KX455876 | Unassigned | Unassigned | Unassigned | 1233_0  | Clustered           | 9 VC_1233_0   | 9   | 0.9676 | 1          | 0.9676 | 0 | 0 | 0 | 1 Ref      |
| KX456206 | Unassigned | Unassigned | Unassigned | 271_0   | Clustered           | 12 VC_271_0   | 12  | 0.4255 | 1          | 0.4255 | 0 | 0 | 0 | 1 Ref      |
| KX456207 | Unassigned | Unassigned | Unassigned | 268_0   | Clustered           | 10 VC_268_0   | 10  | 0.1417 | 1          | 0.1417 | 0 | 0 | 0 | 0.9333 Ref |
| KX456208 | Unassigned | Unassigned | Unassigned | 271_0   | Clustered           | 12 VC_271_0   | 12  | 0.4255 | 1          | 0.4255 | 0 | 0 | 0 | 1 Ref      |
| KX456209 | Unassigned | Unassigned | Unassigned | 271_0   | Clustered           | 12 VC_271_0   | 12  | 0.4255 | 1          | 0.4255 | 0 | 0 | 0 | 1 Ref      |
| KX456210 | Unassigned | Unassigned | Unassigned | 271_0   | Clustered           | 12 VC_271_0   | 12  | 0.4255 | 1          | 0.4255 | 0 | 0 | 0 | 1 Ref      |
| KX456211 | Unassigned | Unassigned | Unassigned | 268_0   | Clustered           | 10 VC_268_0   | 10  | 0.1417 | 1          | 0.1417 | 0 | 0 | 0 | 0.9333 Ref |
| KX456212 | Unassigned | Unassigned | Unassigned | 268_0   | Clustered           | 10 VC_268_0   | 10  | 0.1417 | 1          | 0.1417 | 0 | 0 | 0 | 0.9333 Ref |
| KX456213 | Unassigned | Unassigned | Unassigned | 271_0   | Clustered           | 12 VC_271_0   | 12  | 0.4255 | 1          | 0.4255 | 0 | 0 | 0 | 1 Ref      |
| KX458236 | Unassigned | Unassigned | Unassigned | 535_1   | Clustered           | 108 VC_535_1  | 108 | 0.8479 | 1          | 0.8479 | 0 | 0 | 0 | 0.9955 Ref |
| KX458237 | Unassigned | Unassigned | Unassigned | 532_0   | Clustered           | 75 VC_532_0   | 75  | 0.9393 | 1          | 0.9393 | 0 | 0 | 0 | 1 Ref      |
| KX467643 | Unassigned | Unassigned | Unassigned | 361_0   | Clustered           | 7 VC_361_0    | 7   | 0.9353 | 0.99999998 | 0.9353 | 0 | 0 | 0 | 1 Ref      |
| KX495186 | Unassigned | Unassigned | Unassigned | 195_3   | Clustered           | 9 VC_195_3    | 9   | 0.1955 | 1          | 0.1955 | 0 | 0 | 0 | 0.8611 Ref |
| KX507045 | Unassigned | Unassigned | Unassigned | 661_3   | Clustered           | 9 VC_661_3    | 9   | 0.2124 | 1          | 0.2124 | 0 | 0 | 0 | 0.6944 Ref |
| KX507046 | Unassigned | Unassigned | Unassigned | 511_11  | Clustered/Singleton | 1 VC_511_11   | 1   | 0      | 1          | 0      | 0 | 0 | 0 | 1 Ref      |
| KX507343 | Unassigned | Unassigned | Unassigned | 1016_0  | Clustered           | 62 VC_1016_0  | 62  | 0.8638 | 1          | 0.8638 | 0 | 0 | 0 | 0.743 Ref  |
| KX507344 | Unassigned | Unassigned | Unassigned | 1016_0  | Clustered           | 62 VC_1016_0  | 62  | 0.8638 | 1          | 0.8638 | 0 | 0 | 0 | 0.743 Ref  |
| KX507345 | Unassigned | Unassigned | Unassigned | 1016_0  | Clustered           | 62 VC_1016_0  | 62  | 0.8638 | 1          | 0.8638 | 0 | 0 | 0 | 0.743 Ref  |
| KX507361 | Unassigned | Unassigned | Unassigned | 917_0   | Clustered           | 28 VC_917_0   | 28  | 0.5465 | 1          | 0.5465 | 0 | 0 | 0 | 1 Ref      |
| KX507362 | Unassigned | Unassigned | Unassigned | 532_0   | Clustered           | 75 VC_532_0   | 75  | 0.9393 | 1          | 0.9393 | 0 | 0 | 0 | 1 Ref      |
| KX513864 | Unassigned | Unassigned | Unassigned | 1166_0  | Clustered           | 2 VC_1166_0   | 2   | 0.3171 | 0.93270267 | 0.2957 | 0 | 0 | 0 | 1 Ref      |
| KX513865 | Unassigned | Unassigned | Unassigned | 1145_0  | Clustered           | 164 VC_1145_0 | 164 | 0.8868 | 1          | 0.8868 | 0 | 0 | 0 | 1 Ref      |
| KX513867 | Unassigned | Unassigned | Unassigned | 1184_0  | Clustered           | 10 VC_1184_0  | 10  | 0.7506 | 1          | 0.7506 | 0 | 0 | 0 | 1 Ref      |
| KX513868 | Unassigned | Unassigned | Unassigned | 1170_0  | Clustered           | 19 VC_1170_0  | 19  | 0.7497 | 1          | 0.7497 | 0 | 0 | 0 | 1 Ref      |
| KX513871 | Unassigned | Unassigned | Unassigned | 1235_0  | Clustered           | 3 VC_1235_0   | 3   | 0.1401 | 0.98976974 | 0.1387 | 0 | 0 | 0 | 1 Ref      |
| KX513872 | Unassigned | Unassigned | Unassigned | 1184_0  | Clustered           | 10 VC_1184_0  | 10  | 0.7506 | 1          | 0.7506 | 0 | 0 | 0 | 1 Ref      |
| KX513873 | Unassigned | Unassigned | Unassigned | 1165_0  | Clustered           | 10 VC_1165_0  | 10  | 0.9263 | 1          | 0.9263 | 0 | 0 | 0 | 1 Ref      |
| KX513874 | Unassigned | Unassigned | Unassigned | 1184_0  | Clustered           | 10 VC_1184_0  | 10  | 0.7506 | 1          | 0.7506 | 0 | 0 | 0 | 1 Ref      |
| KX513875 | Unassigned | Unassigned | Unassigned | 1241_0  | Clustered           | 13 VC_1241_0  | 13  | 0.8675 | 0.76044592 | 0.6597 | 0 | 0 | 0 | 1 Ref      |
| KX513877 | Unassigned | Unassigned | Unassigned | 1170_0  | Clustered           | 19 VC_1170_0  | 19  | 0.7497 | 1          | 0.7497 | 0 | 0 | 0 | 1 Ref      |
| KX522565 | Unassigned | Unassigned | Unassigned | 23_0    | Clustered           | 11 VC_23_0    | 11  | 0.5144 | 1          | 0.5144 | 0 | 0 | 0 | 1 Ref      |
| KX522649 | Unassigned | Unassigned | Unassigned | 335_21  | Clustered           | 5 VC_335_21   | 5   | 0.0208 | 0.99999976 | 0.0208 | 0 | 0 | 0 | 0.8 Ref    |
| KX522650 | Unassigned | Unassigned | Unassigned | 1117_0  | Clustered           | 19 VC_1117_0  | 19  | 0.9177 | 1          | 0.9177 | 0 | 0 | 0 | 1 Ref      |
| KX522943 | Unassigned | Unassigned | Unassigned | 335_21  | Clustered           | 5 VC_335_21   | 5   | 0.0208 | 0.99999976 | 0.0208 | 0 | 0 | 0 | 0.8 Ref    |
| KX523125 | Unassigned | Unassigned | Unassigned | 532_0   | Clustered           | 75 VC_532_0   | 75  | 0.9393 | 1          | 0.9393 | 0 | 0 | 0 | 1 Ref      |
| KX523699 | Unassigned | Unassigned | Unassigned | 475_0   | Clustered           | 96 VC_475_0   | 96  | 0.9303 | 1          | 0.9303 | 0 | 0 | 0 | 0.9575 Ref |
| KX532239 | Unassigned | Unassigned | Unassigned | 159_0   | Clustered           | 25 VC_159_0   | 25  | 0.7699 | 1          | 0.7699 | 0 | 0 | 0 | 1 Ref      |
| KX534004 | Unassigned | Unassigned | Unassigned | 783_0   | Clustered           | 67 VC_783_0   | 67  | 0.8945 | 1          | 0.8945 | 0 | 0 | 0 | 1 Ref      |
| KX534335 | Unassigned | Unassigned | Unassigned | 859_0   | Clustered           | 67 VC_859_0   | 67  | 0.9622 | 1          | 0.9622 | 0 | 0 | 0 | 1 Ref      |
| KX534336 | Unassigned | Unassigned | Unassigned | 859_0   | Clustered           | 67 VC_859_0   | 67  | 0.9622 | 1          | 0.9622 | 0 | 0 | 0 | 1 Ref      |
| KX534337 | Unassigned | Unassigned | Unassigned | 819_0   | Clustered           | 19 VC_819_0   | 19  | 0.6835 | 1          | 0.6835 | 0 | 0 | 0 | 1 Ref      |
| KX534338 | Unassigned | Unassigned | Unassigned | 859_0   | Clustered           | 67 VC_859_0   | 67  | 0.9622 | 1          | 0.9622 | 0 | 0 | 0 | 1 Ref      |
| KX534339 | Unassigned | Unassigned | Unassigned | 859_0   | Clustered           | 67 VC_859_0   | 67  | 0.9622 | 1          | 0.9622 | 0 | 0 | 0 | 1 Ref      |
| KX534340 | Unassigned | Unassigned | Unassigned | 20_0    | Clustered           | 5 VC_20_0     | 5   | 0.4268 | 0.99999994 | 0.4268 | 0 | 0 | 0 | 1 Ref      |
| KX534341 | Unassigned | Unassigned | Unassigned | 859_0   | Clustered           | 67 VC_859_0   | 67  | 0.9622 | 1          | 0.9622 | 0 | 0 | 0 | 1 Ref      |
| KX550065 | Unassigned | Unassigned | Unassigned | 425_0   | Clustered           | 40 VC_425_0   | 40  | 0.8399 | 1          | 0.8399 | 0 | 0 | 0 | 0.9974 Ref |
| KX550082 | Unassigned | Unassigned | Unassigned | 991_0   | Clustered           | 39 VC_991_0   | 39  | 1      | 1          | 1      | 0 | 0 | 0 | 1 Ref      |
| KX550441 | Unassigned | Unassigned | Unassigned | 535_1   | Clustered           | 108 VC_535_1  | 108 | 0.8479 | 1          | 0.8479 | 0 | 0 | 0 | 0.9955 Ref |
| KX550442 | Unassigned | Unassigned | Unassigned | 535_0   | Clustered           | 18 VC_535_0   | 18  | 0.1595 | 1          | 0.1595 | 0 | 0 | 0 | 1 Ref      |
| KX550443 | Unassigned | Unassigned | Unassigned | 335_56  | Clustered           | 7 VC_335_56   | 7   | 0.0242 | 1          | 0.0242 | 0 | 0 | 0 | 0.9048 Ref |
| KX552041 | Unassigned | Unassigned | Unassigned | 871_1   | Clustered           | 26 VC_871_1   | 26  | 0.6303 | 1          | 0.6303 | 0 | 0 | 0 | 0.9815 Ref |
| KX555527 | Unassigned | Unassigned | Unassigned | 888_0   | Clustered           | 9 VC_888_0    | 9   | 0.5251 | 1          | 0.5251 | 0 | 0 | 0 | 1 Ref      |
| KX557234 | Unassigned | Unassigned | Unassigned | 535_1   | Clustered           | 108 VC_535_1  | 108 | 0.8479 | 1          | 0.8479 | 0 | 0 | 0 | 0.9955 Ref |
| KX557272 | Unassigned | Unassigned | Unassigned | 1224_0  | Clustered           | 4 VC_1224_0   | 4   | 0.2813 | 0.99997676 | 0.2813 | 0 | 0 | 0 | 1 Ref      |
| KX557273 | Unassigned | Unassigned | Unassigned | 543_0   | Clustered           | 25 VC_543_0   | 25  | 0.4584 | 1          | 0.4584 | 0 | 0 | 0 | 1 Ref      |
| KX557274 | Unassigned | Unassigned | Unassigned | 1217_0  | Clustered           | 41 VC_1217_0  | 41  | 0.9546 | 1          | 0.9546 | 0 | 0 | 0 | 0.9976 Ref |
| KX557275 | Unassigned | Unassigned | Unassigned | 1217_0  | Clustered           | 41 VC_1217_0  | 41  | 0.9546 | 1          | 0.9546 | 0 | 0 | 0 | 0.9976 Ref |
| KX557276 | Unassigned | Unassigned | Unassigned | 1223_1  | Clustered           | 10 VC_1223_1  | 10  | 0.5795 | 1          | 0.5795 | 0 | 0 | 0 | 1 Ref      |
| KX557278 | Unassigned | Unassigned | Unassigned | 1201_0  | Clustered           | 2 VC_1201_0   | 2   | 0.0266 | 0.95737687 | 0.0254 | 0 | 0 | 0 | 1 Ref      |
| KX557279 | Unassigned | Unassigned | Unassigned | 1218_0  | Clustered           | 14 VC_1218_0  | 14  | 0.7811 | 1          | 0.7811 | 0 | 0 | 0 | 0.989 Ref  |
| KX557280 | Unassigned | Unassigned | Unassigned | 231_0   | Clustered           | 19 VC_231_0   | 19  | 0.9378 | 1          | 0.9378 | 0 | 0 | 0 | 1 Ref      |
| KX557281 | Unassigned | Unassigned | Unassigned | 894_0   | Clustered           | 6 VC_894_0    | 6   | 0.3171 | 1          | 0.3171 | 0 | 0 | 0 | 1 Ref      |
| KX557282 | Unassigned | Unassigned | Unassigned | 1226_0  | Clustered           | 5 VC_1226_0   | 5   | 0.6594 | 0.99999982 | 0.6594 | 0 | 0 | 0 | 1 Ref      |
| KX557283 | Unassigned | Unassigned | Unassigned | 231_0   | Clustered           | 19 VC_231_0   | 19  | 0.9378 | 1          | 0.9378 | 0 | 0 | 0 | 1 Ref      |
| KX557284 | Unassigned | Unassigned | Unassigned | 231_0   | Clustered           | 19 VC_231_0   | 19  | 0.9378 | 1          | 0.9378 | 0 | 0 | 0 | 1 Ref      |
| KX557285 | Unassigned | Unassigned | Unassigned | 590_0   | Clustered           | 9 VC_590_0    | 9   | 0.4952 | 1          | 0.4952 | 0 | 0 | 0 | 1 Ref      |
| KX557286 | Unassigned | Unassigned | Unassigned | 1219_0  | Clustered           | 24 VC_1219_0  | 24  | 0.9519 | 1          | 0.9519 | 0 | 0 | 0 | 1 Ref      |
| KX557287 | Unassigned | Unassigned | Unassigned | 543_0   | Clustered           | 25 VC_543_0   | 25  | 0.4584 | 1          | 0.4584 | 0 | 0 | 0 | 1 Ref      |
| KX574454 | Unassigned | Unassigned | Unassigned | 335_21  | Clustered           | 5 VC_335_21   | 5   | 0.0208 | 0.99999976 | 0.0208 | 0 | 0 | 0 | 0.8 Ref    |
| KX574455 | Unassigned | Unassigned | Unassigned | 222_1   | Clustered           | 19 VC_222_1   | 19  | 0.4166 | 1          | 0.4166 | 0 | 0 | 0 | 1 Ref      |
| KX576638 | Unassigned | Unassigned | Unassigned | 230_0   | Clustered           | 38 VC_230_0   | 38  | 0.9076 | 1          | 0.9076 | 0 | 0 | 0 | 1 Ref      |
| KX576639 | Unassigned | Unassigned | Unassigned | 223_6   | Clustered           | 42 VC_223_6   | 42  | 0.4717 | 1          | 0.4717 | 0 | 0 | 0 | 0.8351 Ref |
| KX576640 | Unassigned | Unassigned | Unassigned | 1200_0  | Clustered           | 73 VC_1200_0  | 73  | 0.9825 | 1          | 0.9825 | 0 | 0 | 0 | 1 Ref      |
| KX576641 | Unassigned | Unassigned | Unassigned | 1200_0  | Clustered           | 73 VC_1200_0  | 73  | 0.9825 | 1          | 0.9825 | 0 | 0 | 0 | 1 Ref      |
| KX576642 | Unassigned | Unassigned | Unassigned | 985_0   | Clustered           | 38 VC_985_0   | 38  | 0.9334 | 1          | 0.9334 | 0 | 0 | 0 | 1 Ref      |
| KX576643 | Unassigned | Unassigned | Unassigned | 384_18  | Clustered           | 10 VC_384_18  | 10  | 0.0301 | 1          | 0.0301 | 0 | 0 | 0 | 0.8 Ref    |
| KX576644 | Unassigned | Unassigned | Unassigned | 538_77  | Clustered           | 3 VC_538_77   | 3   | 0.0216 | 0.99859911 | 0.0216 | 0 | 0 | 0 | 1 Ref      |



|          |            |            |            |        |                     |              |     |        |            |        |   |   |   |        |     |
|----------|------------|------------|------------|--------|---------------------|--------------|-----|--------|------------|--------|---|---|---|--------|-----|
| KX576645 | Unassigned | Unassigned | Unassigned | 384_13 | Clustered           | 33 VC_384_13 | 33  | 0.1785 | 1          | 0.1785 | 0 | 0 | 0 | 0.8769 | Ref |
| KX576646 | Unassigned | Unassigned | Unassigned | 384_13 | Clustered           | 33 VC_384_13 | 33  | 0.1785 | 1          | 0.1785 | 0 | 0 | 0 | 0.8769 | Ref |
| KX576647 | Unassigned | Unassigned | Unassigned | 384_13 | Clustered           | 33 VC_384_13 | 33  | 0.1785 | 1          | 0.1785 | 0 | 0 | 0 | 0.8769 | Ref |
| KX578042 | Unassigned | Unassigned | Unassigned | 889_0  | Clustered           | 13 VC_889_0  | 13  | 0.6844 | 1          | 0.6844 | 0 | 0 | 0 | 1      | Ref |
| KX578043 | Unassigned | Unassigned | Unassigned | 889_0  | Clustered           | 13 VC_889_0  | 13  | 0.6844 | 1          | 0.6844 | 0 | 0 | 0 | 1      | Ref |
| KX578044 | Unassigned | Unassigned | Unassigned | 889_0  | Clustered           | 13 VC_889_0  | 13  | 0.6844 | 1          | 0.6844 | 0 | 0 | 0 | 1      | Ref |
| KX578071 | Unassigned | Unassigned | Unassigned | 384_15 | Clustered           | 44 VC_384_15 | 44  | 0.139  | 1          | 0.139  | 0 | 0 | 0 | 0.7474 | Ref |
| KX579975 | Unassigned | Unassigned | Unassigned | 535_0  | Clustered           | 18 VC_535_0  | 18  | 0.1595 | 1          | 0.1595 | 0 | 0 | 0 | 1      | Ref |
| KX580961 | Unassigned | Unassigned | Unassigned | 917_0  | Clustered           | 28 VC_917_0  | 28  | 0.5465 | 1          | 0.5465 | 0 | 0 | 0 | 1      | Ref |
| KX580962 | Unassigned | Unassigned | Unassigned | 917_0  | Clustered           | 28 VC_917_0  | 28  | 0.5465 | 1          | 0.5465 | 0 | 0 | 0 | 1      | Ref |
| KX581090 | Unassigned | Unassigned | Unassigned | 306_0  | Clustered           | 24 VC_306_0  | 24  | 0.9902 | 1          | 0.9902 | 0 | 0 | 0 | 1      | Ref |
| KX581091 | Unassigned | Unassigned | Unassigned | 306_0  | Clustered           | 24 VC_306_0  | 24  | 0.9902 | 1          | 0.9902 | 0 | 0 | 0 | 1      | Ref |
| KX581092 | Unassigned | Unassigned | Unassigned | 306_0  | Clustered           | 24 VC_306_0  | 24  | 0.9902 | 1          | 0.9902 | 0 | 0 | 0 | 1      | Ref |
| KX581093 | Unassigned | Unassigned | Unassigned | 306_0  | Clustered           | 24 VC_306_0  | 24  | 0.9902 | 1          | 0.9902 | 0 | 0 | 0 | 1      | Ref |
| KX581094 | Unassigned | Unassigned | Unassigned | 306_0  | Clustered           | 24 VC_306_0  | 24  | 0.9902 | 1          | 0.9902 | 0 | 0 | 0 | 1      | Ref |
| KX581095 | Unassigned | Unassigned | Unassigned | 306_0  | Clustered           | 24 VC_306_0  | 24  | 0.9902 | 1          | 0.9902 | 0 | 0 | 0 | 1      | Ref |
| KX581096 | Unassigned | Unassigned | Unassigned | 306_0  | Clustered           | 24 VC_306_0  | 24  | 0.9902 | 1          | 0.9902 | 0 | 0 | 0 | 1      | Ref |
| KX581097 | Unassigned | Unassigned | Unassigned | 306_0  | Clustered           | 24 VC_306_0  | 24  | 0.9902 | 1          | 0.9902 | 0 | 0 | 0 | 1      | Ref |
| KX581098 | Unassigned | Unassigned | Unassigned | 306_0  | Clustered           | 24 VC_306_0  | 24  | 0.9902 | 1          | 0.9902 | 0 | 0 | 0 | 1      | Ref |
| KX581099 | Unassigned | Unassigned | Unassigned | 306_0  | Clustered           | 24 VC_306_0  | 24  | 0.9902 | 1          | 0.9902 | 0 | 0 | 0 | 1      | Ref |
| KX581100 | Unassigned | Unassigned | Unassigned | 306_0  | Clustered           | 24 VC_306_0  | 24  | 0.9902 | 1          | 0.9902 | 0 | 0 | 0 | 1      | Ref |
| KX585251 | Unassigned | Unassigned | Unassigned | 245_0  | Clustered           | 17 VC_245_0  | 17  | 0.6081 | 1          | 0.6081 | 0 | 0 | 0 | 1      | Ref |
| KX585252 | Unassigned | Unassigned | Unassigned | 232_0  | Clustered           | 32 VC_232_0  | 32  | 0.8471 | 1          | 0.8471 | 0 | 0 | 0 | 0.996  | Ref |
| KX585253 | Unassigned | Unassigned | Unassigned | 243_0  | Clustered           | 72 VC_243_0  | 72  | 0.8089 | 1          | 0.8089 | 0 | 0 | 0 | 1      | Ref |
| KX587949 | Unassigned | Unassigned | Unassigned | 113_0  | Clustered           | 91 VC_113_0  | 91  | 0.9584 | 1          | 0.9584 | 0 | 0 | 0 | 1      | Ref |
| KX588251 | Unassigned | Unassigned | Unassigned | 783_0  | Clustered           | 67 VC_783_0  | 67  | 0.8945 | 1          | 0.8945 | 0 | 0 | 0 | 1      | Ref |
| KX589269 | Unassigned | Unassigned | Unassigned | 385_0  | Clustered           | 24 VC_385_0  | 24  | 0.5516 | 1          | 0.5516 | 0 | 0 | 0 | 1      | Ref |
| KX591654 | Unassigned | Unassigned | Unassigned | 848_0  | Clustered           | 124 VC_848_0 | 124 | 0.9484 | 1          | 0.9484 | 0 | 0 | 0 | 1      | Ref |
| KX592589 | Unassigned | Unassigned | Unassigned | 384_11 | Clustered           | 31 VC_384_11 | 31  | 0.0926 | 1          | 0.0926 | 0 | 0 | 0 | 0.7011 | Ref |
| KX607101 | Unassigned | Unassigned | Unassigned | 461_0  | Clustered           | 3 VC_461_0   | 3   | 0.8247 | 0.99509929 | 0.8207 | 0 | 0 | 0 | 1      | Ref |
| KX607102 | Unassigned | Unassigned | Unassigned | 461_0  | Clustered           | 3 VC_461_0   | 3   | 0.8247 | 0.99509929 | 0.8207 | 0 | 0 | 0 | 1      | Ref |
| KX610764 | Unassigned | Unassigned | Unassigned | 538_83 | Clustered/Singleton | 1 VC_538_83  | 1   | 0      | 1          | 0      | 0 | 0 | 0 | 1      | Ref |
| KX610765 | Unassigned | Unassigned | Unassigned | 985_0  | Clustered           | 38 VC_985_0  | 38  | 0.9334 | 1          | 0.9334 | 0 | 0 | 0 | 1      | Ref |
| KX611788 | Unassigned | Unassigned | Unassigned | 991_0  | Clustered           | 39 VC_991_0  | 39  | 1      | 1          | 1      | 0 | 0 | 0 | 1      | Ref |
| KX611831 | Unassigned | Unassigned | Unassigned | 571_6  | Clustered           | 22 VC_571_6  | 22  | 0.1207 | 1          | 0.1207 | 0 | 0 | 0 | 0.8095 | Ref |
| KX619650 | Unassigned | Unassigned | Unassigned | 223_6  | Clustered           | 42 VC_223_6  | 42  | 0.4717 | 1          | 0.4717 | 0 | 0 | 0 | 0.8351 | Ref |
| KX619651 | Unassigned | Unassigned | Unassigned | 535_1  | Clustered           | 108 VC_535_1 | 108 | 0.8479 | 1          | 0.8479 | 0 | 0 | 0 | 0.9955 | Ref |
| KX620750 | Unassigned | Unassigned | Unassigned | 1228_0 | Clustered           | 4 VC_1228_0  | 4   | 0.463  | 0.99990292 | 0.463  | 0 | 0 | 0 | 1      | Ref |
| KX620751 | Unassigned | Unassigned | Unassigned | 1228_0 | Clustered           | 4 VC_1228_0  | 4   | 0.463  | 0.99990292 | 0.463  | 0 | 0 | 0 | 1      | Ref |
| KX620753 | Unassigned | Unassigned | Unassigned | 1228_0 | Clustered           | 4 VC_1228_0  | 4   | 0.463  | 0.99990292 | 0.463  | 0 | 0 | 0 | 1      | Ref |
| KX620754 | Unassigned | Unassigned | Unassigned | 1228_0 | Clustered           | 4 VC_1228_0  | 4   | 0.463  | 0.99990292 | 0.463  | 0 | 0 | 0 | 1      | Ref |
| KX620786 | Unassigned | Unassigned | Unassigned | 384_16 | Clustered           | 42 VC_384_16 | 42  | 0.134  | 1          | 0.134  | 0 | 0 | 0 | 0.7282 | Ref |
| KX621004 | Unassigned | Unassigned | Unassigned | 1200_0 | Clustered           | 73 VC_1200_0 | 73  | 0.9825 | 1          | 0.9825 | 0 | 0 | 0 | 1      | Ref |
| KX621005 | Unassigned | Unassigned | Unassigned | 1200_0 | Clustered           | 73 VC_1200_0 | 73  | 0.9825 | 1          | 0.9825 | 0 | 0 | 0 | 1      | Ref |
| KX621007 | Unassigned | Unassigned | Unassigned | 241_0  | Clustered           | 21 VC_241_0  | 21  | 0.8342 | 1          | 0.8342 | 0 | 0 | 0 | 1      | Ref |
| KX636165 | Unassigned | Unassigned | Unassigned | 245_0  | Clustered           | 17 VC_245_0  | 17  | 0.6081 | 1          | 0.6081 | 0 | 0 | 0 | 1      | Ref |
| KX640831 | Unassigned | Unassigned | Unassigned | 531_0  | Clustered           | 32 VC_531_0  | 32  | 0.6859 | 1          | 0.6859 | 0 | 0 | 0 | 1      | Ref |
| KX641260 | Unassigned | Unassigned | Unassigned | 535_0  | Clustered           | 18 VC_535_0  | 18  | 0.1595 | 1          | 0.1595 | 0 | 0 | 0 | 1      | Ref |
| KX641261 | Unassigned | Unassigned | Unassigned | 230_0  | Clustered           | 38 VC_230_0  | 38  | 0.9076 | 1          | 0.9076 | 0 | 0 | 0 | 1      | Ref |
| KX641262 | Unassigned | Unassigned | Unassigned | 537_0  | Clustered           | 39 VC_537_0  | 39  | 0.8148 | 1          | 0.8148 | 0 | 0 | 0 | 1      | Ref |
| KX641263 | Unassigned | Unassigned | Unassigned | 223_3  | Clustered           | 8 VC_223_3   | 8   | 0.0699 | 1          | 0.0699 | 0 | 0 | 0 | 0.8571 | Ref |
| KX641264 | Unassigned | Unassigned | Unassigned | 243_0  | Clustered           | 72 VC_243_0  | 72  | 0.8089 | 1          | 0.8089 | 0 | 0 | 0 | 1      | Ref |
| KX641265 | Unassigned | Unassigned | Unassigned | 783_0  | Clustered           | 67 VC_783_0  | 67  | 0.8945 | 1          | 0.8945 | 0 | 0 | 0 | 1      | Ref |
| KX641266 | Unassigned | Unassigned | Unassigned | 783_0  | Clustered           | 67 VC_783_0  | 67  | 0.8945 | 1          | 0.8945 | 0 | 0 | 0 | 1      | Ref |
| KX648373 | Unassigned | Unassigned | Unassigned | 535_1  | Clustered           | 108 VC_535_1 | 108 | 0.8479 | 1          | 0.8479 | 0 | 0 | 0 | 0.9955 | Ref |
| KX649889 | Unassigned | Unassigned | Unassigned | 654_0  | Clustered           | 115 VC_654_0 | 115 | 0.7303 | 1          | 0.7303 | 0 | 0 | 0 | 0.8764 | Ref |
| KX656785 | Unassigned | Unassigned | Unassigned | 703_0  | Clustered           | 3 VC_703_0   | 3   | 0.5841 | 0.99252665 | 0.5797 | 0 | 0 | 0 | 1      | Ref |
| KX657793 | Unassigned | Unassigned | Unassigned | 229_0  | Clustered           | 5 VC_229_0   | 5   | 0.0566 | 0.99999997 | 0.0566 | 0 | 0 | 0 | 1      | Ref |
| KX657794 | Unassigned | Unassigned | Unassigned | 243_0  | Clustered           | 72 VC_243_0  | 72  | 0.8089 | 1          | 0.8089 | 0 | 0 | 0 | 1      | Ref |
| KX657795 | Unassigned | Unassigned | Unassigned | 243_0  | Clustered           | 72 VC_243_0  | 72  | 0.8089 | 1          | 0.8089 | 0 | 0 | 0 | 1      | Ref |
| KX657796 | Unassigned | Unassigned | Unassigned | 243_0  | Clustered           | 72 VC_243_0  | 72  | 0.8089 | 1          | 0.8089 | 0 | 0 | 0 | 1      | Ref |
| KX660669 | Unassigned | Unassigned | Unassigned | 71_0   | Clustered           | 27 VC_71_0   | 27  | 0.5964 | 1          | 0.5964 | 0 | 0 | 0 | 0.9943 | Ref |
| KX664447 | Unassigned | Unassigned | Unassigned | 232_0  | Clustered           | 32 VC_232_0  | 32  | 0.8471 | 1          | 0.8471 | 0 | 0 | 0 | 0.996  | Ref |
| KX664448 | Unassigned | Unassigned | Unassigned | 532_0  | Clustered           | 75 VC_532_0  | 75  | 0.9393 | 1          | 0.9393 | 0 | 0 | 0 | 1      | Ref |
| KX664455 | Unassigned | Unassigned | Unassigned | 783_0  | Clustered           | 67 VC_783_0  | 67  | 0.8945 | 1          | 0.8945 | 0 | 0 | 0 | 1      | Ref |
| KX664695 | Unassigned | Unassigned | Unassigned | 871_1  | Clustered           | 26 VC_871_1  | 26  | 0.6303 | 1          | 0.6303 | 0 | 0 | 0 | 0.9815 | Ref |
| KX669227 | Unassigned | Unassigned | Unassigned | 465_0  | Clustered           | 80 VC_465_0  | 80  | 0.9988 | 1          | 0.9988 | 0 | 0 | 0 | 1      | Ref |
| KX670786 | Unassigned | Unassigned | Unassigned | 1117_0 | Clustered           | 19 VC_1117_0 | 19  | 0.9177 | 1          | 0.9177 | 0 | 0 | 0 | 1      | Ref |
| KX670787 | Unassigned | Unassigned | Unassigned | 1117_0 | Clustered           | 19 VC_1117_0 | 19  | 0.9177 | 1          | 0.9177 | 0 | 0 | 0 | 1      | Ref |
| KX670788 | Unassigned | Unassigned | Unassigned | 532_0  | Clustered           | 75 VC_532_0  | 75  | 0.9393 | 1          | 0.9393 | 0 | 0 | 0 | 1      | Ref |
| KX670789 | Unassigned | Unassigned | Unassigned | 901_0  | Clustered           | 31 VC_901_0  | 31  | 0.8235 | 1          | 0.8235 | 0 | 0 | 0 | 0.8194 | Ref |
| KX670790 | Unassigned | Unassigned | Unassigned | 901_0  | Clustered           | 31 VC_901_0  | 31  | 0.8235 | 1          | 0.8235 | 0 | 0 | 0 | 0.8194 | Ref |
| KX670813 | Unassigned | Unassigned | Unassigned | 384_15 | Clustered           | 44 VC_384_15 | 44  | 0.139  | 1          | 0.139  | 0 | 0 | 0 | 0.7474 | Ref |
| KX670828 | Unassigned | Unassigned | Unassigned | 531_0  | Clustered           | 32 VC_531_0  | 32  | 0.6859 | 1          | 0.6859 | 0 | 0 | 0 | 1      | Ref |
| KX683292 | Unassigned | Unassigned | Unassigned | 384_15 | Clustered           | 44 VC_384_15 | 44  | 0.139  | 1          | 0.139  | 0 | 0 | 0 | 0.7474 | Ref |
| KX683293 | Unassigned | Unassigned | Unassigned | 384_15 | Clustered           | 44 VC_384_15 | 44  | 0.139  | 1          | 0.139  | 0 | 0 | 0 | 0.7474 | Ref |
| KX683423 | Unassigned | Unassigned | Unassigned | 531_0  | Clustered           | 32 VC_531_0  | 32  | 0.6859 | 1          | 0.6859 | 0 | 0 | 0 | 1      | Ref |
| KX683428 | Unassigned | Unassigned | Unassigned | 244_1  | Clustered           | 13 VC_244_1  | 13  | 0.1766 | 1          | 0.1766 | 0 | 0 | 0 | 0.7308 | Ref |
| KX683875 | Unassigned | Unassigned | Unassigned | 223_4  | Clustered           | 13 VC_223_4  | 13  | 0.1649 | 1          | 0.1649 | 0 | 0 | 0 | 1      | Ref |
| KX683876 | Unassigned | Unassigned | Unassigned | 335_27 | Clustered           | 6 VC_335_27  | 6   | 0.0266 | 1          | 0.0266 | 0 | 0 | 0 | 0.8    | Ref |
| KX685355 | Unassigned | Unassigned | Unassigned | 232_0  | Clustered           | 32 VC_232_0  | 32  | 0.8471 | 1          | 0.8471 | 0 | 0 | 0 | 0.996  | Ref |



|          |            |            |            |        |                     |              |     |        |            |        |   |   |   |            |
|----------|------------|------------|------------|--------|---------------------|--------------|-----|--------|------------|--------|---|---|---|------------|
| KX688102 | Unassigned | Unassigned | Unassigned | 1200_0 | Clustered           | 73 VC_1200_0 | 73  | 0.9825 | 1          | 0.9825 | 0 | 0 | 0 | 1 Ref      |
| KX688103 | Unassigned | Unassigned | Unassigned | 1200_0 | Clustered           | 73 VC_1200_0 | 73  | 0.9825 | 1          | 0.9825 | 0 | 0 | 0 | 1 Ref      |
| KX689784 | Unassigned | Unassigned | Unassigned | 465_0  | Clustered           | 80 VC_465_0  | 80  | 0.9988 | 1          | 0.9988 | 0 | 0 | 0 | 1 Ref      |
| KX702319 | Unassigned | Unassigned | Unassigned | 384_13 | Clustered           | 33 VC_384_13 | 33  | 0.1785 | 1          | 0.1785 | 0 | 0 | 0 | 0.8769 Ref |
| KX702320 | Unassigned | Unassigned | Unassigned | 335_27 | Clustered           | 6 VC_335_27  | 6   | 0.0266 | 1          | 0.0266 | 0 | 0 | 0 | 0.8 Ref    |
| KX711710 | Unassigned | Unassigned | Unassigned | 434_0  | Clustered           | 45 VC_434_0  | 45  | 0.9479 | 1          | 0.9479 | 0 | 0 | 0 | 1 Ref      |
| KX712070 | Unassigned | Unassigned | Unassigned | 848_0  | Clustered           | 124 VC_848_0 | 124 | 0.9484 | 1          | 0.9484 | 0 | 0 | 0 | 1 Ref      |
| KX712071 | Unassigned | Unassigned | Unassigned | 848_0  | Clustered           | 124 VC_848_0 | 124 | 0.9484 | 1          | 0.9484 | 0 | 0 | 0 | 1 Ref      |
| KX712143 | Unassigned | Unassigned | Unassigned | 360_0  | Clustered           | 22 VC_360_0  | 22  | 0.96   | 1          | 0.96   | 0 | 0 | 0 | 1 Ref      |
| KX712236 | Unassigned | Unassigned | Unassigned | 991_0  | Clustered           | 39 VC_991_0  | 39  | 1      | 1          | 1      | 0 | 0 | 0 | 1 Ref      |
| KX712237 | Unassigned | Unassigned | Unassigned | 991_0  | Clustered           | 39 VC_991_0  | 39  | 1      | 1          | 1      | 0 | 0 | 0 | 1 Ref      |
| KX712238 | Unassigned | Unassigned | Unassigned | 335_38 | Clustered/Singleton | 1 VC_335_38  | 1   | 0      | 1          | 0      | 0 | 0 | 0 | 1 Ref      |
| KX721255 | Unassigned | Unassigned | Unassigned | 579_49 | Clustered           | 7 VC_579_49  | 7   | 0.0194 | 0.98914431 | 0.0191 | 0 | 0 | 0 | 0.8571 Ref |
| KX721256 | Unassigned | Unassigned | Unassigned | 579_48 | Clustered           | 2 VC_579_48  | 2   | 0.0032 | 0.68030515 | 0.0022 | 0 | 0 | 0 | 1 Ref      |
| KX752698 | Unassigned | Unassigned | Unassigned | 579_81 | Clustered/Singleton | 1 VC_579_81  | 1   | 0      | 1          | 0      | 0 | 0 | 0 | 1 Ref      |
| KX756439 | Unassigned | Unassigned | Unassigned | 539_0  | Clustered           | 37 VC_539_0  | 37  | 0.911  | 1          | 0.911  | 0 | 0 | 0 | 1 Ref      |
| KX756572 | Unassigned | Unassigned | Unassigned | 907_0  | Clustered           | 32 VC_907_0  | 32  | 0.9964 | 1          | 0.9964 | 0 | 0 | 0 | 1 Ref      |
| KX758538 | Unassigned | Unassigned | Unassigned | 222_1  | Clustered           | 19 VC_222_1  | 19  | 0.4166 | 1          | 0.4166 | 0 | 0 | 0 | 1 Ref      |
| KX758539 | Unassigned | Unassigned | Unassigned | 224_0  | Clustered           | 5 VC_224_0   | 5   | 0.0685 | 0.99999998 | 0.0685 | 0 | 0 | 0 | 1 Ref      |
| KX765862 | Unassigned | Unassigned | Unassigned | 611_0  | Clustered           | 50 VC_611_0  | 50  | 0.7306 | 1          | 0.7306 | 0 | 0 | 0 | 1 Ref      |
| KX765863 | Unassigned | Unassigned | Unassigned | 611_0  | Clustered           | 50 VC_611_0  | 50  | 0.7306 | 1          | 0.7306 | 0 | 0 | 0 | 1 Ref      |
| KX765864 | Unassigned | Unassigned | Unassigned | 611_0  | Clustered           | 50 VC_611_0  | 50  | 0.7306 | 1          | 0.7306 | 0 | 0 | 0 | 1 Ref      |
| KX765865 | Unassigned | Unassigned | Unassigned | 135_15 | Clustered           | 2 VC_135_15  | 2   | 0.0051 | 0.84262835 | 0.0043 | 0 | 0 | 0 | 1 Ref      |
| KX774321 | Unassigned | Unassigned | Unassigned | 1113_1 | Clustered/Singleton | 1 VC_1113_1  | 1   | 0      | 1          | 0      | 0 | 0 | 0 | 1 Ref      |
| KX774374 | Unassigned | Unassigned | Unassigned | 5_0    | Clustered           | 27 VC_5_0    | 27  | 0.9599 | 1          | 0.9599 | 0 | 0 | 0 | 1 Ref      |
| KX776161 | Unassigned | Unassigned | Unassigned | 30_1   | Clustered           | 53 VC_30_1   | 53  | 0.7151 | 1          | 0.7151 | 0 | 0 | 0 | 0.9325 Ref |
| KX778611 | Unassigned | Unassigned | Unassigned | 398_0  | Clustered           | 51 VC_398_0  | 51  | 0.8741 | 1          | 0.8741 | 0 | 0 | 0 | 1 Ref      |
| KX781992 | Unassigned | Unassigned | Unassigned | 579_9  | Clustered           | 3 VC_579_9   | 3   | 0.0064 | 0.81181703 | 0.0052 | 0 | 0 | 0 | 0.6667 Ref |
| KX808129 | Unassigned | Unassigned | Unassigned | 532_0  | Clustered           | 75 VC_532_0  | 75  | 0.9393 | 1          | 0.9393 | 0 | 0 | 0 | 1 Ref      |
| KX808130 | Unassigned | Unassigned | Unassigned | 535_1  | Clustered           | 108 VC_535_1 | 108 | 0.8479 | 1          | 0.8479 | 0 | 0 | 0 | 0.9955 Ref |
| KX808131 | Unassigned | Unassigned | Unassigned | 538_16 | Clustered/Singleton | 1 VC_538_16  | 1   | 0      | 1          | 0      | 0 | 0 | 0 | 1 Ref      |
| KX815338 | Unassigned | Unassigned | Unassigned | 1016_0 | Clustered           | 62 VC_1016_0 | 62  | 0.8638 | 1          | 0.8638 | 0 | 0 | 0 | 0.743 Ref  |
| KX817173 | Unassigned | Unassigned | Unassigned | 571_2  | Clustered           | 17 VC_571_2  | 17  | 0.0965 | 1          | 0.0965 | 0 | 0 | 0 | 0.9779 Ref |
| KX817174 | Unassigned | Unassigned | Unassigned | 535_1  | Clustered           | 108 VC_535_1 | 108 | 0.8479 | 1          | 0.8479 | 0 | 0 | 0 | 0.9955 Ref |
| KX817175 | Unassigned | Unassigned | Unassigned | 535_1  | Clustered           | 108 VC_535_1 | 108 | 0.8479 | 1          | 0.8479 | 0 | 0 | 0 | 0.9955 Ref |
| KX822733 | Unassigned | Unassigned | Unassigned | 514_3  | Clustered/Singleton | 1 VC_514_3   | 1   | 0      | 1          | 0      | 0 | 0 | 0 | 1 Ref      |
| KX826077 | Unassigned | Unassigned | Unassigned | 440_0  | Clustered           | 33 VC_440_0  | 33  | 0.992  | 1          | 0.992  | 0 | 0 | 0 | 1 Ref      |
| KX827368 | Unassigned | Unassigned | Unassigned | 11_0   | Clustered           | 19 VC_11_0   | 19  | 0.7544 | 1          | 0.7544 | 0 | 0 | 0 | 1 Ref      |
| KX827369 | Unassigned | Unassigned | Unassigned | 11_0   | Clustered           | 19 VC_11_0   | 19  | 0.7544 | 1          | 0.7544 | 0 | 0 | 0 | 1 Ref      |
| KX827370 | Unassigned | Unassigned | Unassigned | 11_0   | Clustered           | 19 VC_11_0   | 19  | 0.7544 | 1          | 0.7544 | 0 | 0 | 0 | 1 Ref      |
| KX827371 | Unassigned | Unassigned | Unassigned | 15_0   | Clustered           | 3 VC_15_0    | 3   | 0.0477 | 0.99853676 | 0.0476 | 0 | 0 | 0 | 1 Ref      |
| KX828710 | Unassigned | Unassigned | Unassigned | 595_0  | Clustered           | 35 VC_595_0  | 35  | 0.8809 | 1          | 0.8809 | 0 | 0 | 0 | 1 Ref      |
| KX828711 | Unassigned | Unassigned | Unassigned | 290_85 | Clustered/Singleton | 1 VC_290_85  | 1   | 0      | 1          | 0      | 0 | 0 | 0 | 1 Ref      |
| KX831080 | Unassigned | Unassigned | Unassigned | 579_82 | Clustered           | 3 VC_579_82  | 3   | 0.0064 | 0.86736674 | 0.0056 | 0 | 0 | 0 | 0.6667 Ref |
| KX833211 | Unassigned | Unassigned | Unassigned | 235_0  | Clustered           | 60 VC_235_0  | 60  | 0.9413 | 1          | 0.9413 | 0 | 0 | 0 | 1 Ref      |
| KX834009 | Unassigned | Unassigned | Unassigned | 571_6  | Clustered           | 22 VC_571_6  | 22  | 0.1207 | 1          | 0.1207 | 0 | 0 | 0 | 0.8095 Ref |
| KX845404 | Unassigned | Unassigned | Unassigned | 200_0  | Clustered           | 15 VC_200_0  | 15  | 0.5004 | 1          | 0.5004 | 0 | 0 | 0 | 1 Ref      |
| KX855961 | Unassigned | Unassigned | Unassigned | 1117_0 | Clustered           | 19 VC_1117_0 | 19  | 0.9177 | 1          | 0.9177 | 0 | 0 | 0 | 1 Ref      |
| KX855962 | Unassigned | Unassigned | Unassigned | 1117_0 | Clustered           | 19 VC_1117_0 | 19  | 0.9177 | 1          | 0.9177 | 0 | 0 | 0 | 1 Ref      |
| KX856662 | Unassigned | Unassigned | Unassigned | 113_0  | Clustered           | 91 VC_113_0  | 91  | 0.9584 | 1          | 0.9584 | 0 | 0 | 0 | 1 Ref      |
| KX879601 | Unassigned | Unassigned | Unassigned | 745_0  | Clustered           | 9 VC_745_0   | 9   | 0.9955 | 0.99999771 | 0.9955 | 0 | 0 | 0 | 1 Ref      |
| KX879602 | Unassigned | Unassigned | Unassigned | 745_0  | Clustered           | 9 VC_745_0   | 9   | 0.9955 | 0.99999771 | 0.9955 | 0 | 0 | 0 | 1 Ref      |
| KX879627 | Unassigned | Unassigned | Unassigned | 868_0  | Clustered           | 27 VC_868_0  | 27  | 0.9372 | 1          | 0.9372 | 0 | 0 | 0 | 1 Ref      |
| KX879641 | Unassigned | Unassigned | Unassigned | 262_0  | Clustered           | 14 VC_262_0  | 14  | 0.2364 | 1          | 0.2364 | 0 | 0 | 0 | 1 Ref      |
| KX879642 | Unassigned | Unassigned | Unassigned | 262_0  | Clustered           | 14 VC_262_0  | 14  | 0.2364 | 1          | 0.2364 | 0 | 0 | 0 | 1 Ref      |
| KX879643 | Unassigned | Unassigned | Unassigned | 261_0  | Clustered           | 13 VC_261_0  | 13  | 0.2024 | 1          | 0.2024 | 0 | 0 | 0 | 1 Ref      |
| KX889068 | Unassigned | Unassigned | Unassigned | 809_0  | Clustered           | 7 VC_809_0   | 7   | 0.5153 | 1          | 0.5153 | 0 | 0 | 0 | 1 Ref      |
| KX897981 | Unassigned | Unassigned | Unassigned | 222_1  | Clustered           | 19 VC_222_1  | 19  | 0.4166 | 1          | 0.4166 | 0 | 0 | 0 | 1 Ref      |
| KX898399 | Unassigned | Unassigned | Unassigned | 479_0  | Clustered           | 7 VC_479_0   | 7   | 0.3294 | 1          | 0.3294 | 0 | 0 | 0 | 1 Ref      |
| KX898400 | Unassigned | Unassigned | Unassigned | 479_0  | Clustered           | 7 VC_479_0   | 7   | 0.3294 | 1          | 0.3294 | 0 | 0 | 0 | 1 Ref      |
| KX911187 | Unassigned | Unassigned | Unassigned | 642_0  | Clustered           | 3 VC_642_0   | 3   | 0.1258 | 0.72377751 | 0.0911 | 0 | 0 | 0 | 1 Ref      |
| KX912252 | Unassigned | Unassigned | Unassigned | 927_0  | Clustered           | 5 VC_927_0   | 5   | 0.4988 | 0.99999981 | 0.4988 | 0 | 0 | 0 | 1 Ref      |
| KX961385 | Unassigned | Unassigned | Unassigned | 172_0  | Clustered           | 26 VC_172_0  | 26  | 0.7909 | 1          | 0.7909 | 0 | 0 | 0 | 1 Ref      |
| KX961629 | Unassigned | Unassigned | Unassigned | 913_0  | Clustered           | 28 VC_913_0  | 28  | 0.6206 | 1          | 0.6206 | 0 | 0 | 0 | 0.9841 Ref |
| KX961630 | Unassigned | Unassigned | Unassigned | 195_0  | Clustered           | 4 VC_195_0   | 4   | 0.0656 | 0.9999431  | 0.0656 | 0 | 0 | 0 | 1 Ref      |
| KX961631 | Unassigned | Unassigned | Unassigned | 843_0  | Clustered           | 20 VC_843_0  | 20  | 0.9621 | 1          | 0.9621 | 0 | 0 | 0 | 1 Ref      |
| KX961632 | Unassigned | Unassigned | Unassigned | 913_0  | Clustered           | 28 VC_913_0  | 28  | 0.6206 | 1          | 0.6206 | 0 | 0 | 0 | 0.9841 Ref |
| KX965989 | Unassigned | Unassigned | Unassigned | 145_1  | Clustered/Singleton | 1 VC_145_1   | 1   | 0      | 1          | 0      | 0 | 0 | 0 | 1 Ref      |
| KX982260 | Unassigned | Unassigned | Unassigned | 958_0  | Clustered           | 3 VC_958_0   | 3   | 0.2752 | 0.95138727 | 0.2618 | 0 | 0 | 0 | 1 Ref      |
| KX987127 | Unassigned | Unassigned | Unassigned | 829_0  | Clustered           | 4 VC_829_0   | 4   | 0.9064 | 0.99761409 | 0.9042 | 0 | 0 | 0 | 1 Ref      |
| KX987158 | Unassigned | Unassigned | Unassigned | 1090_0 | Clustered           | 8 VC_1090_0  | 8   | 0.6377 | 1          | 0.6377 | 0 | 0 | 0 | 1 Ref      |
| KX987999 | Unassigned | Unassigned | Unassigned | 195_1  | Clustered           | 7 VC_195_1   | 7   | 0.1409 | 1          | 0.1409 | 0 | 0 | 0 | 1 Ref      |
| KY000003 | Unassigned | Unassigned | Unassigned | 135_30 | Clustered           | 2 VC_135_30  | 2   | 0.0052 | 0.87577187 | 0.0045 | 0 | 0 | 0 | 1 Ref      |
| KY000079 | Unassigned | Unassigned | Unassigned | 717_0  | Clustered           | 5 VC_717_0   | 5   | 0.7757 | 0.99999988 | 0.7757 | 0 | 0 | 0 | 1 Ref      |
| KY000080 | Unassigned | Unassigned | Unassigned | 509_0  | Clustered           | 36 VC_509_0  | 36  | 0.5291 | 1          | 0.5291 | 0 | 0 | 0 | 0.9714 Ref |
| KY000081 | Unassigned | Unassigned | Unassigned | 113_0  | Clustered           | 91 VC_113_0  | 91  | 0.9584 | 1          | 0.9584 | 0 | 0 | 0 | 1 Ref      |
| KY000082 | Unassigned | Unassigned | Unassigned | 80_11  | Clustered/Singleton | 1 VC_80_11   | 1   | 0      | 1          | 0      | 0 | 0 | 0 | 1 Ref      |
| KY000083 | Unassigned | Unassigned | Unassigned | 77_0   | Clustered           | 37 VC_77_0   | 37  | 0.9392 | 1          | 0.9392 | 0 | 0 | 0 | 1 Ref      |
| KY000084 | Unassigned | Unassigned | Unassigned | 98_0   | Clustered           | 30 VC_98_0   | 30  | 0.7175 | 1          | 0.7175 | 0 | 0 | 0 | 1 Ref      |
| KY000085 | Unassigned | Unassigned | Unassigned | 98_0   | Clustered           | 30 VC_98_0   | 30  | 0.7175 | 1          | 0.7175 | 0 | 0 | 0 | 1 Ref      |
| KY000218 | Unassigned | Unassigned | Unassigned | 172_0  | Clustered           | 26 VC_172_0  | 26  | 0.7909 | 1          | 0.7909 | 0 | 0 | 0 | 1 Ref      |



|          |            |            |            |        |                     |              |     |        |            |        |   |   |   |            |
|----------|------------|------------|------------|--------|---------------------|--------------|-----|--------|------------|--------|---|---|---|------------|
| KY000219 | Unassigned | Unassigned | Unassigned | 172_0  | Clustered           | 26 VC_172_0  | 26  | 0.7909 | 1          | 0.7909 | 0 | 0 | 0 | 1 Ref      |
| KY000220 | Unassigned | Unassigned | Unassigned | 172_0  | Clustered           | 26 VC_172_0  | 26  | 0.7909 | 1          | 0.7909 | 0 | 0 | 0 | 1 Ref      |
| KY000221 | Unassigned | Unassigned | Unassigned | 172_0  | Clustered           | 26 VC_172_0  | 26  | 0.7909 | 1          | 0.7909 | 0 | 0 | 0 | 1 Ref      |
| KY002061 | Unassigned | Unassigned | Unassigned | 1090_0 | Clustered           | 8 VC_1090_0  | 8   | 0.6377 | 1          | 0.6377 | 0 | 0 | 0 | 1 Ref      |
| KY006473 | Unassigned | Unassigned | Unassigned | 535_1  | Clustered           | 108 VC_535_1 | 108 | 0.8479 | 1          | 0.8479 | 0 | 0 | 0 | 0.9955 Ref |
| KY006474 | Unassigned | Unassigned | Unassigned | 384_1  | Clustered           | 11 VC_384_1  | 11  | 0.0378 | 1          | 0.0378 | 0 | 0 | 0 | 0.8545 Ref |
| KY006853 | Unassigned | Unassigned | Unassigned | 176_1  | Clustered/Singleton | 1 VC_176_1   | 1   | 0      | 1          | 0      | 0 | 0 | 0 | 1 Ref      |
| KY014601 | Unassigned | Unassigned | Unassigned | 611_0  | Clustered           | 50 VC_611_0  | 50  | 0.7306 | 1          | 0.7306 | 0 | 0 | 0 | 1 Ref      |
| KY022433 | Unassigned | Unassigned | Unassigned | 935_2  | Clustered           | 7 VC_935_2   | 7   | 0.2837 | 1          | 0.2837 | 0 | 0 | 0 | 1 Ref      |
| KY030782 | Unassigned | Unassigned | Unassigned | 91_2   | Clustered           | 5 VC_91_2    | 5   | 0.2025 | 0.99999726 | 0.2025 | 0 | 0 | 0 | 1 Ref      |
| KY045851 | Unassigned | Unassigned | Unassigned | 5_0    | Clustered           | 27 VC_5_0    | 27  | 0.9599 | 1          | 0.9599 | 0 | 0 | 0 | 1 Ref      |
| KY053532 | Unassigned | Unassigned | Unassigned | 826_0  | Clustered           | 7 VC_826_0   | 7   | 0.0509 | 0.99909926 | 0.0508 | 0 | 0 | 0 | 1 Ref      |
| KY056619 | Unassigned | Unassigned | Unassigned | 908_0  | Clustered           | 36 VC_908_0  | 36  | 0.9943 | 1          | 0.9943 | 0 | 0 | 0 | 1 Ref      |
| KY056620 | Unassigned | Unassigned | Unassigned | 8_0    | Clustered           | 58 VC_8_0    | 58  | 0.8285 | 1          | 0.8285 | 0 | 0 | 0 | 0.9946 Ref |
| KY065147 | Unassigned | Unassigned | Unassigned | 513_1  | Clustered           | 41 VC_513_1  | 41  | 0.3276 | 1          | 0.3276 | 0 | 0 | 0 | 0.911 Ref  |
| KY065148 | Unassigned | Unassigned | Unassigned | 806_0  | Clustered           | 6 VC_806_0   | 6   | 0.5468 | 1          | 0.5468 | 0 | 0 | 0 | 1 Ref      |
| KY065149 | Unassigned | Unassigned | Unassigned | 1022_0 | Clustered           | 2 VC_1022_0  | 2   | 0.1197 | 0.95251219 | 0.114  | 0 | 0 | 0 | 1 Ref      |
| KY065449 | Unassigned | Unassigned | Unassigned | 428_0  | Clustered/Singleton | 1 VC_428_0   | 1   | 0      | 1          | 0      | 0 | 0 | 0 | 1 Ref      |
| KY065450 | Unassigned | Unassigned | Unassigned | 427_0  | Clustered           | 37 VC_427_0  | 37  | 0.5729 | 1          | 0.5729 | 0 | 0 | 0 | 0.9474 Ref |
| KY065451 | Unassigned | Unassigned | Unassigned | 427_0  | Clustered           | 37 VC_427_0  | 37  | 0.5729 | 1          | 0.5729 | 0 | 0 | 0 | 0.9474 Ref |
| KY065452 | Unassigned | Unassigned | Unassigned | 427_0  | Clustered           | 37 VC_427_0  | 37  | 0.5729 | 1          | 0.5729 | 0 | 0 | 0 | 0.9474 Ref |
| KY065453 | Unassigned | Unassigned | Unassigned | 344_0  | Clustered           | 30 VC_344_0  | 30  | 0.523  | 1          | 0.523  | 0 | 0 | 0 | 0.9954 Ref |
| KY065454 | Unassigned | Unassigned | Unassigned | 344_0  | Clustered           | 30 VC_344_0  | 30  | 0.523  | 1          | 0.523  | 0 | 0 | 0 | 0.9954 Ref |
| KY065455 | Unassigned | Unassigned | Unassigned | 425_0  | Clustered           | 40 VC_425_0  | 40  | 0.8399 | 1          | 0.8399 | 0 | 0 | 0 | 0.9974 Ref |
| KY065456 | Unassigned | Unassigned | Unassigned | 427_0  | Clustered           | 37 VC_427_0  | 37  | 0.5729 | 1          | 0.5729 | 0 | 0 | 0 | 0.9474 Ref |
| KY065457 | Unassigned | Unassigned | Unassigned | 757_0  | Clustered           | 5 VC_757_0   | 5   | 0.0972 | 0.99999635 | 0.0972 | 0 | 0 | 0 | 0.6 Ref    |
| KY065458 | Unassigned | Unassigned | Unassigned | 344_0  | Clustered           | 30 VC_344_0  | 30  | 0.523  | 1          | 0.523  | 0 | 0 | 0 | 0.9954 Ref |
| KY065459 | Unassigned | Unassigned | Unassigned | 344_0  | Clustered           | 30 VC_344_0  | 30  | 0.523  | 1          | 0.523  | 0 | 0 | 0 | 0.9954 Ref |
| KY065460 | Unassigned | Unassigned | Unassigned | 344_0  | Clustered           | 30 VC_344_0  | 30  | 0.523  | 1          | 0.523  | 0 | 0 | 0 | 0.9954 Ref |
| KY065461 | Unassigned | Unassigned | Unassigned | 344_0  | Clustered           | 30 VC_344_0  | 30  | 0.523  | 1          | 0.523  | 0 | 0 | 0 | 0.9954 Ref |
| KY065462 | Unassigned | Unassigned | Unassigned | 344_0  | Clustered           | 30 VC_344_0  | 30  | 0.523  | 1          | 0.523  | 0 | 0 | 0 | 0.9954 Ref |
| KY065463 | Unassigned | Unassigned | Unassigned | 344_0  | Clustered           | 30 VC_344_0  | 30  | 0.523  | 1          | 0.523  | 0 | 0 | 0 | 0.9954 Ref |
| KY065464 | Unassigned | Unassigned | Unassigned | 757_0  | Clustered           | 5 VC_757_0   | 5   | 0.0972 | 0.99999635 | 0.0972 | 0 | 0 | 0 | 0.6 Ref    |
| KY065465 | Unassigned | Unassigned | Unassigned | 426_0  | Clustered           | 3 VC_426_0   | 3   | 0.041  | 0.99840705 | 0.0409 | 0 | 0 | 0 | 1 Ref      |
| KY065466 | Unassigned | Unassigned | Unassigned | 324_0  | Clustered           | 2 VC_324_0   | 2   | 0.0438 | 0.9562359  | 0.0419 | 0 | 0 | 0 | 1 Ref      |
| KY065468 | Unassigned | Unassigned | Unassigned | 324_0  | Clustered           | 2 VC_324_0   | 2   | 0.0438 | 0.9562359  | 0.0419 | 0 | 0 | 0 | 1 Ref      |
| KY065469 | Unassigned | Unassigned | Unassigned | 344_0  | Clustered           | 30 VC_344_0  | 30  | 0.523  | 1          | 0.523  | 0 | 0 | 0 | 0.9954 Ref |
| KY065470 | Unassigned | Unassigned | Unassigned | 344_0  | Clustered           | 30 VC_344_0  | 30  | 0.523  | 1          | 0.523  | 0 | 0 | 0 | 0.9954 Ref |
| KY065471 | Unassigned | Unassigned | Unassigned | 344_0  | Clustered           | 30 VC_344_0  | 30  | 0.523  | 1          | 0.523  | 0 | 0 | 0 | 0.9954 Ref |
| KY065472 | Unassigned | Unassigned | Unassigned | 344_0  | Clustered           | 30 VC_344_0  | 30  | 0.523  | 1          | 0.523  | 0 | 0 | 0 | 0.9954 Ref |
| KY065473 | Unassigned | Unassigned | Unassigned | 427_0  | Clustered           | 37 VC_427_0  | 37  | 0.5729 | 1          | 0.5729 | 0 | 0 | 0 | 0.9474 Ref |
| KY065474 | Unassigned | Unassigned | Unassigned | 427_0  | Clustered           | 37 VC_427_0  | 37  | 0.5729 | 1          | 0.5729 | 0 | 0 | 0 | 0.9474 Ref |
| KY065475 | Unassigned | Unassigned | Unassigned | 427_0  | Clustered           | 37 VC_427_0  | 37  | 0.5729 | 1          | 0.5729 | 0 | 0 | 0 | 0.9474 Ref |
| KY065476 | Unassigned | Unassigned | Unassigned | 427_0  | Clustered           | 37 VC_427_0  | 37  | 0.5729 | 1          | 0.5729 | 0 | 0 | 0 | 0.9474 Ref |
| KY065477 | Unassigned | Unassigned | Unassigned | 427_0  | Clustered           | 37 VC_427_0  | 37  | 0.5729 | 1          | 0.5729 | 0 | 0 | 0 | 0.9474 Ref |
| KY065478 | Unassigned | Unassigned | Unassigned | 427_0  | Clustered           | 37 VC_427_0  | 37  | 0.5729 | 1          | 0.5729 | 0 | 0 | 0 | 0.9474 Ref |
| KY065479 | Unassigned | Unassigned | Unassigned | 425_0  | Clustered           | 40 VC_425_0  | 40  | 0.8399 | 1          | 0.8399 | 0 | 0 | 0 | 0.9974 Ref |
| KY065480 | Unassigned | Unassigned | Unassigned | 427_0  | Clustered           | 37 VC_427_0  | 37  | 0.5729 | 1          | 0.5729 | 0 | 0 | 0 | 0.9474 Ref |
| KY065485 | Unassigned | Unassigned | Unassigned | 268_1  | Clustered           | 20 VC_268_1  | 20  | 0.1906 | 1          | 0.1906 | 0 | 0 | 0 | 0.6789 Ref |
| KY065486 | Unassigned | Unassigned | Unassigned | 427_0  | Clustered           | 37 VC_427_0  | 37  | 0.5729 | 1          | 0.5729 | 0 | 0 | 0 | 0.9474 Ref |
| KY065487 | Unassigned | Unassigned | Unassigned | 425_0  | Clustered           | 40 VC_425_0  | 40  | 0.8399 | 1          | 0.8399 | 0 | 0 | 0 | 0.9974 Ref |
| KY065488 | Unassigned | Unassigned | Unassigned | 427_0  | Clustered           | 37 VC_427_0  | 37  | 0.5729 | 1          | 0.5729 | 0 | 0 | 0 | 0.9474 Ref |
| KY065490 | Unassigned | Unassigned | Unassigned | 425_0  | Clustered           | 40 VC_425_0  | 40  | 0.8399 | 1          | 0.8399 | 0 | 0 | 0 | 0.9974 Ref |
| KY065491 | Unassigned | Unassigned | Unassigned | 425_0  | Clustered           | 40 VC_425_0  | 40  | 0.8399 | 1          | 0.8399 | 0 | 0 | 0 | 0.9974 Ref |
| KY065492 | Unassigned | Unassigned | Unassigned | 425_0  | Clustered           | 40 VC_425_0  | 40  | 0.8399 | 1          | 0.8399 | 0 | 0 | 0 | 0.9974 Ref |
| KY065493 | Unassigned | Unassigned | Unassigned | 425_0  | Clustered           | 40 VC_425_0  | 40  | 0.8399 | 1          | 0.8399 | 0 | 0 | 0 | 0.9974 Ref |
| KY065494 | Unassigned | Unassigned | Unassigned | 344_0  | Clustered           | 30 VC_344_0  | 30  | 0.523  | 1          | 0.523  | 0 | 0 | 0 | 0.9954 Ref |
| KY065495 | Unassigned | Unassigned | Unassigned | 344_0  | Clustered           | 30 VC_344_0  | 30  | 0.523  | 1          | 0.523  | 0 | 0 | 0 | 0.9954 Ref |
| KY065496 | Unassigned | Unassigned | Unassigned | 427_0  | Clustered           | 37 VC_427_0  | 37  | 0.5729 | 1          | 0.5729 | 0 | 0 | 0 | 0.9474 Ref |
| KY065497 | Unassigned | Unassigned | Unassigned | 427_0  | Clustered           | 37 VC_427_0  | 37  | 0.5729 | 1          | 0.5729 | 0 | 0 | 0 | 0.9474 Ref |
| KY065499 | Unassigned | Unassigned | Unassigned | 344_0  | Clustered           | 30 VC_344_0  | 30  | 0.523  | 1          | 0.523  | 0 | 0 | 0 | 0.9954 Ref |
| KY065500 | Unassigned | Unassigned | Unassigned | 427_0  | Clustered           | 37 VC_427_0  | 37  | 0.5729 | 1          | 0.5729 | 0 | 0 | 0 | 0.9474 Ref |
| KY065501 | Unassigned | Unassigned | Unassigned | 425_0  | Clustered           | 40 VC_425_0  | 40  | 0.8399 | 1          | 0.8399 | 0 | 0 | 0 | 0.9974 Ref |
| KY065502 | Unassigned | Unassigned | Unassigned | 425_0  | Clustered           | 40 VC_425_0  | 40  | 0.8399 | 1          | 0.8399 | 0 | 0 | 0 | 0.9974 Ref |
| KY065503 | Unassigned | Unassigned | Unassigned | 268_1  | Clustered           | 20 VC_268_1  | 20  | 0.1906 | 1          | 0.1906 | 0 | 0 | 0 | 0.6789 Ref |
| KY065504 | Unassigned | Unassigned | Unassigned | 268_1  | Clustered           | 20 VC_268_1  | 20  | 0.1906 | 1          | 0.1906 | 0 | 0 | 0 | 0.6789 Ref |
| KY065505 | Unassigned | Unassigned | Unassigned | 427_0  | Clustered           | 37 VC_427_0  | 37  | 0.5729 | 1          | 0.5729 | 0 | 0 | 0 | 0.9474 Ref |
| KY073123 | Unassigned | Unassigned | Unassigned | 134_2  | Clustered           | 17 VC_134_2  | 17  | 0.1715 | 1          | 0.1715 | 0 | 0 | 0 | 0.9853 Ref |
| KY073228 | Unassigned | Unassigned | Unassigned | 77_0   | Clustered           | 37 VC_77_0   | 37  | 0.9392 | 1          | 0.9392 | 0 | 0 | 0 | 1 Ref      |
| KY082667 | Unassigned | Unassigned | Unassigned | 714_0  | Clustered           | 71 VC_714_0  | 71  | 0.935  | 1          | 0.935  | 0 | 0 | 0 | 1 Ref      |
| KY083058 | Unassigned | Unassigned | Unassigned | 535_1  | Clustered           | 108 VC_535_1 | 108 | 0.8479 | 1          | 0.8479 | 0 | 0 | 0 | 0.9955 Ref |
| KY083059 | Unassigned | Unassigned | Unassigned | 535_0  | Clustered           | 18 VC_535_0  | 18  | 0.1595 | 1          | 0.1595 | 0 | 0 | 0 | 1 Ref      |
| KY083060 | Unassigned | Unassigned | Unassigned | 535_1  | Clustered           | 108 VC_535_1 | 108 | 0.8479 | 1          | 0.8479 | 0 | 0 | 0 | 0.9955 Ref |
| KY083061 | Unassigned | Unassigned | Unassigned | 535_1  | Clustered           | 108 VC_535_1 | 108 | 0.8479 | 1          | 0.8479 | 0 | 0 | 0 | 0.9955 Ref |
| KY083062 | Unassigned | Unassigned | Unassigned | 535_1  | Clustered           | 108 VC_535_1 | 108 | 0.8479 | 1          | 0.8479 | 0 | 0 | 0 | 0.9955 Ref |
| KY083063 | Unassigned | Unassigned | Unassigned | 535_1  | Clustered           | 108 VC_535_1 | 108 | 0.8479 | 1          | 0.8479 | 0 | 0 | 0 | 0.9955 Ref |
| KY083726 | Unassigned | Unassigned | Unassigned | 865_0  | Clustered           | 10 VC_865_0  | 10  | 0.5975 | 1          | 0.5975 | 0 | 0 | 0 | 1 Ref      |
| KY084243 | Unassigned | Unassigned | Unassigned | 399_0  | Clustered           | 49 VC_399_0  | 49  | 0.7927 | 1          | 0.7927 | 0 | 0 | 0 | 1 Ref      |
| KY087898 | Unassigned | Unassigned | Unassigned | 816_0  | Clustered           | 35 VC_816_0  | 35  | 0.9824 | 1          | 0.9824 | 0 | 0 | 0 | 1 Ref      |
| KY087992 | Unassigned | Unassigned | Unassigned | 241_0  | Clustered           | 21 VC_241_0  | 21  | 0.8342 | 1          | 0.8342 | 0 | 0 | 0 | 1 Ref      |
| KY087993 | Unassigned | Unassigned | Unassigned | 244_1  | Clustered           | 13 VC_244_1  | 13  | 0.1766 | 1          | 0.1766 | 0 | 0 | 0 | 0.7308 Ref |



|          |            |            |            |         |                     |     |            |     |        |            |        |   |   |   |        |     |
|----------|------------|------------|------------|---------|---------------------|-----|------------|-----|--------|------------|--------|---|---|---|--------|-----|
| KY092479 | Unassigned | Unassigned | Unassigned | 742_0   | Clustered           | 11  | VC_742_0   | 11  | 0.5046 | 1          | 0.5046 | 0 | 0 | 0 | 1      | Ref |
| KY092480 | Unassigned | Unassigned | Unassigned | 742_0   | Clustered           | 11  | VC_742_0   | 11  | 0.5046 | 1          | 0.5046 | 0 | 0 | 0 | 1      | Ref |
| KY092481 | Unassigned | Unassigned | Unassigned | 742_0   | Clustered           | 11  | VC_742_0   | 11  | 0.5046 | 1          | 0.5046 | 0 | 0 | 0 | 1      | Ref |
| KY092482 | Unassigned | Unassigned | Unassigned | 742_0   | Clustered           | 11  | VC_742_0   | 11  | 0.5046 | 1          | 0.5046 | 0 | 0 | 0 | 1      | Ref |
| KY092483 | Unassigned | Unassigned | Unassigned | 742_0   | Clustered           | 11  | VC_742_0   | 11  | 0.5046 | 1          | 0.5046 | 0 | 0 | 0 | 1      | Ref |
| KY092484 | Unassigned | Unassigned | Unassigned | 742_0   | Clustered           | 11  | VC_742_0   | 11  | 0.5046 | 1          | 0.5046 | 0 | 0 | 0 | 1      | Ref |
| KY114934 | Unassigned | Unassigned | Unassigned | 198_21  | Clustered/Singleton | 1   | VC_198_21  | 1   | 0      | 1          | 0      | 0 | 0 | 0 | 1      | Ref |
| KY117485 | Unassigned | Unassigned | Unassigned | 160_0   | Clustered           | 4   | VC_160_0   | 4   | 0.1752 | 0.9999526  | 0.1752 | 0 | 0 | 0 | 1      | Ref |
| KY130461 | Unassigned | Unassigned | Unassigned | 525_0   | Clustered           | 8   | VC_525_0   | 8   | 0.443  | 1          | 0.443  | 0 | 0 | 0 | 1      | Ref |
| KY176369 | Unassigned | Unassigned | Unassigned | 654_1   | Clustered           | 27  | VC_654_1   | 27  | 0.2571 | 1          | 0.2571 | 0 | 0 | 0 | 0.9858 | Ref |
| KY203335 | Unassigned | Unassigned | Unassigned | 422_0   | Clustered           | 3   | VC_422_0   | 3   | 0.1422 | 0.98161408 | 0.1396 | 0 | 0 | 0 | 1      | Ref |
| KY204244 | Unassigned | Unassigned | Unassigned | 535_1   | Clustered           | 108 | VC_535_1   | 108 | 0.8479 | 1          | 0.8479 | 0 | 0 | 0 | 0.9955 | Ref |
| KY204245 | Unassigned | Unassigned | Unassigned | 535_1   | Clustered           | 108 | VC_535_1   | 108 | 0.8479 | 1          | 0.8479 | 0 | 0 | 0 | 0.9955 | Ref |
| KY204246 | Unassigned | Unassigned | Unassigned | 535_1   | Clustered           | 108 | VC_535_1   | 108 | 0.8479 | 1          | 0.8479 | 0 | 0 | 0 | 0.9955 | Ref |
| KY204247 | Unassigned | Unassigned | Unassigned | 535_1   | Clustered           | 108 | VC_535_1   | 108 | 0.8479 | 1          | 0.8479 | 0 | 0 | 0 | 0.9955 | Ref |
| KY204248 | Unassigned | Unassigned | Unassigned | 535_1   | Clustered           | 108 | VC_535_1   | 108 | 0.8479 | 1          | 0.8479 | 0 | 0 | 0 | 0.9955 | Ref |
| KY204249 | Unassigned | Unassigned | Unassigned | 535_1   | Clustered           | 108 | VC_535_1   | 108 | 0.8479 | 1          | 0.8479 | 0 | 0 | 0 | 0.9955 | Ref |
| KY204250 | Unassigned | Unassigned | Unassigned | 535_1   | Clustered           | 108 | VC_535_1   | 108 | 0.8479 | 1          | 0.8479 | 0 | 0 | 0 | 0.9955 | Ref |
| KY204251 | Unassigned | Unassigned | Unassigned | 535_1   | Clustered           | 108 | VC_535_1   | 108 | 0.8479 | 1          | 0.8479 | 0 | 0 | 0 | 0.9955 | Ref |
| KY206887 | Unassigned | Unassigned | Unassigned | 1060_0  | Clustered           | 4   | VC_1060_0  | 4   | 0.875  | 0.99993415 | 0.8749 | 0 | 0 | 0 | 1      | Ref |
| KY210139 | Unassigned | Unassigned | Unassigned | 377_0   | Clustered           | 16  | VC_377_0   | 16  | 0.6424 | 1          | 0.6424 | 0 | 0 | 0 | 1      | Ref |
| KY213952 | Unassigned | Unassigned | Unassigned | 335_42  | Clustered           | 2   | VC_335_42  | 2   | 0.0039 | 0.95008941 | 0.0037 | 0 | 0 | 0 | 1      | Ref |
| KY223999 | Unassigned | Unassigned | Unassigned | 785_2   | Clustered           | 7   | VC_785_2   | 7   | 0.2595 | 1          | 0.2595 | 0 | 0 | 0 | 1      | Ref |
| KY224000 | Unassigned | Unassigned | Unassigned | 385_1   | Clustered           | 9   | VC_385_1   | 9   | 0.1928 | 1          | 0.1928 | 0 | 0 | 0 | 1      | Ref |
| KY224001 | Unassigned | Unassigned | Unassigned | 335_57  | Clustered/Singleton | 1   | VC_335_57  | 1   | 0      | 1          | 0      | 0 | 0 | 0 | 1      | Ref |
| KY249644 | Unassigned | Unassigned | Unassigned | 614_0   | Clustered           | 4   | VC_614_0   | 4   | 0.0588 | 0.99274182 | 0.0584 | 0 | 0 | 0 | 1      | Ref |
| KY250482 | Unassigned | Unassigned | Unassigned | 422_0   | Clustered           | 3   | VC_422_0   | 3   | 0.1422 | 0.98161408 | 0.1396 | 0 | 0 | 0 | 1      | Ref |
| KY264020 | Unassigned | Unassigned | Unassigned | 996_0   | Clustered           | 3   | VC_996_0   | 3   | 0.6852 | 0.9859071  | 0.6755 | 0 | 0 | 0 | 1      | Ref |
| KY268295 | Unassigned | Unassigned | Unassigned | 714_0   | Clustered           | 71  | VC_714_0   | 71  | 0.935  | 1          | 0.935  | 0 | 0 | 0 | 1      | Ref |
| KY268296 | Unassigned | Unassigned | Unassigned | 714_0   | Clustered           | 71  | VC_714_0   | 71  | 0.935  | 1          | 0.935  | 0 | 0 | 0 | 1      | Ref |
| KY271395 | Unassigned | Unassigned | Unassigned | 33_0    | Clustered           | 9   | VC_33_0    | 9   | 0.3409 | 1          | 0.3409 | 0 | 0 | 0 | 0.6944 | Ref |
| KY271396 | Unassigned | Unassigned | Unassigned | 33_0    | Clustered           | 9   | VC_33_0    | 9   | 0.3409 | 1          | 0.3409 | 0 | 0 | 0 | 0.6944 | Ref |
| KY271397 | Unassigned | Unassigned | Unassigned | 236_0   | Clustered           | 32  | VC_236_0   | 32  | 0.9115 | 1          | 0.9115 | 0 | 0 | 0 | 1      | Ref |
| KY271398 | Unassigned | Unassigned | Unassigned | 6_0     | Clustered           | 44  | VC_6_0     | 44  | 0.9068 | 1          | 0.9068 | 0 | 0 | 0 | 1      | Ref |
| KY271401 | Unassigned | Unassigned | Unassigned | 252_0   | Clustered           | 12  | VC_252_0   | 12  | 0.4075 | 1          | 0.4075 | 0 | 0 | 0 | 1      | Ref |
| KY271402 | Unassigned | Unassigned | Unassigned | 37_0    | Clustered           | 4   | VC_37_0    | 4   | 0.4325 | 0.99998062 | 0.4325 | 0 | 0 | 0 | 1      | Ref |
| KY290756 | Unassigned | Unassigned | Unassigned | 1067_0  | Clustered           | 20  | VC_1067_0  | 20  | 0.7109 | 1          | 0.7109 | 0 | 0 | 0 | 1      | Ref |
| KY290947 | Unassigned | Unassigned | Unassigned | 1233_0  | Clustered           | 9   | VC_1233_0  | 9   | 0.9676 | 1          | 0.9676 | 0 | 0 | 0 | 1      | Ref |
| KY290948 | Unassigned | Unassigned | Unassigned | 619_1   | Clustered           | 7   | VC_619_1   | 7   | 0.1834 | 0.99999997 | 0.1834 | 0 | 0 | 0 | 1      | Ref |
| KY290949 | Unassigned | Unassigned | Unassigned | 1233_0  | Clustered           | 9   | VC_1233_0  | 9   | 0.9676 | 1          | 0.9676 | 0 | 0 | 0 | 1      | Ref |
| KY290950 | Unassigned | Unassigned | Unassigned | 1233_0  | Clustered           | 9   | VC_1233_0  | 9   | 0.9676 | 1          | 0.9676 | 0 | 0 | 0 | 1      | Ref |
| KY290951 | Unassigned | Unassigned | Unassigned | 619_1   | Clustered           | 7   | VC_619_1   | 7   | 0.1834 | 0.99999997 | 0.1834 | 0 | 0 | 0 | 1      | Ref |
| KY290952 | Unassigned | Unassigned | Unassigned | 1233_0  | Clustered           | 9   | VC_1233_0  | 9   | 0.9676 | 1          | 0.9676 | 0 | 0 | 0 | 1      | Ref |
| KY290953 | Unassigned | Unassigned | Unassigned | 380_0   | Clustered           | 6   | VC_380_0   | 6   | 0.51   | 1          | 0.51   | 0 | 0 | 0 | 1      | Ref |
| KY290954 | Unassigned | Unassigned | Unassigned | 380_0   | Clustered           | 6   | VC_380_0   | 6   | 0.51   | 1          | 0.51   | 0 | 0 | 0 | 1      | Ref |
| KY290955 | Unassigned | Unassigned | Unassigned | 457_3   | Clustered           | 2   | VC_457_3   | 2   | 0.0286 | 0.89347378 | 0.0255 | 0 | 0 | 0 | 1      | Ref |
| KY290956 | Unassigned | Unassigned | Unassigned | 619_1   | Clustered           | 7   | VC_619_1   | 7   | 0.1834 | 0.99999997 | 0.1834 | 0 | 0 | 0 | 1      | Ref |
| KY290957 | Unassigned | Unassigned | Unassigned | 619_1   | Clustered           | 7   | VC_619_1   | 7   | 0.1834 | 0.99999997 | 0.1834 | 0 | 0 | 0 | 1      | Ref |
| KY290958 | Unassigned | Unassigned | Unassigned | 619_1   | Clustered           | 7   | VC_619_1   | 7   | 0.1834 | 0.99999997 | 0.1834 | 0 | 0 | 0 | 1      | Ref |
| KY290975 | Unassigned | Unassigned | Unassigned | 290_111 | Clustered/Singleton | 1   | VC_290_111 | 1   | 0      | 1          | 0      | 0 | 0 | 0 | 1      | Ref |
| KY295891 | Unassigned | Unassigned | Unassigned | 466_0   | Clustered           | 66  | VC_466_0   | 66  | 0.9246 | 1          | 0.9246 | 0 | 0 | 0 | 1      | Ref |
| KY295892 | Unassigned | Unassigned | Unassigned | 466_0   | Clustered           | 66  | VC_466_0   | 66  | 0.9246 | 1          | 0.9246 | 0 | 0 | 0 | 1      | Ref |
| KY295893 | Unassigned | Unassigned | Unassigned | 466_0   | Clustered           | 66  | VC_466_0   | 66  | 0.9246 | 1          | 0.9246 | 0 | 0 | 0 | 1      | Ref |
| KY295894 | Unassigned | Unassigned | Unassigned | 465_0   | Clustered           | 80  | VC_465_0   | 80  | 0.9988 | 1          | 0.9988 | 0 | 0 | 0 | 1      | Ref |
| KY295895 | Unassigned | Unassigned | Unassigned | 655_0   | Clustered           | 45  | VC_655_0   | 45  | 0.7722 | 1          | 0.7722 | 0 | 0 | 0 | 1      | Ref |
| KY295896 | Unassigned | Unassigned | Unassigned | 655_0   | Clustered           | 45  | VC_655_0   | 45  | 0.7722 | 1          | 0.7722 | 0 | 0 | 0 | 1      | Ref |
| KY295897 | Unassigned | Unassigned | Unassigned | 466_0   | Clustered           | 66  | VC_466_0   | 66  | 0.9246 | 1          | 0.9246 | 0 | 0 | 0 | 1      | Ref |
| KY295898 | Unassigned | Unassigned | Unassigned | 655_0   | Clustered           | 45  | VC_655_0   | 45  | 0.7722 | 1          | 0.7722 | 0 | 0 | 0 | 1      | Ref |
| KY295899 | Unassigned | Unassigned | Unassigned | 466_0   | Clustered           | 66  | VC_466_0   | 66  | 0.9246 | 1          | 0.9246 | 0 | 0 | 0 | 1      | Ref |
| KY296500 | Unassigned | Unassigned | Unassigned | 838_0   | Clustered           | 3   | VC_838_0   | 3   | 1      | 1          | 1      | 0 | 0 | 0 | 1      | Ref |
| KY296501 | Unassigned | Unassigned | Unassigned | 838_0   | Clustered           | 3   | VC_838_0   | 3   | 1      | 1          | 1      | 0 | 0 | 0 | 1      | Ref |
| KY303907 | Unassigned | Unassigned | Unassigned | 110_0   | Clustered           | 33  | VC_110_0   | 33  | 0.9488 | 1          | 0.9488 | 0 | 0 | 0 | 1      | Ref |
| KY316062 | Unassigned | Unassigned | Unassigned | 71_0    | Clustered           | 27  | VC_71_0    | 27  | 0.5964 | 1          | 0.5964 | 0 | 0 | 0 | 0.9943 | Ref |
| KY318515 | Unassigned | Unassigned | Unassigned | 907_0   | Clustered           | 32  | VC_907_0   | 32  | 0.9964 | 1          | 0.9964 | 0 | 0 | 0 | 1      | Ref |
| KY319168 | Unassigned | Unassigned | Unassigned | 571_2   | Clustered           | 17  | VC_571_2   | 17  | 0.0965 | 1          | 0.0965 | 0 | 0 | 0 | 0.9779 | Ref |
| KY348865 | Unassigned | Unassigned | Unassigned | 538_44  | Clustered/Singleton | 1   | VC_538_44  | 1   | 0      | 1          | 0      | 0 | 0 | 0 | 1      | Ref |
| KY349816 | Unassigned | Unassigned | Unassigned | 425_0   | Clustered           | 40  | VC_425_0   | 40  | 0.8399 | 1          | 0.8399 | 0 | 0 | 0 | 0.9974 | Ref |
| KY363465 | Unassigned | Unassigned | Unassigned | 201_0   | Clustered           | 2   | VC_201_0   | 2   | 0.0315 | 0.95762656 | 0.0301 | 0 | 0 | 0 | 1      | Ref |
| KY365739 | Unassigned | Unassigned | Unassigned | 891_0   | Clustered           | 11  | VC_891_0   | 11  | 0.9663 | 1          | 0.9663 | 0 | 0 | 0 | 1      | Ref |
| KY368639 | Unassigned | Unassigned | Unassigned | 89_0    | Clustered           | 8   | VC_89_0    | 8   | 0.5507 | 1          | 0.5507 | 0 | 0 | 0 | 1      | Ref |
| KY368640 | Unassigned | Unassigned | Unassigned | 87_4    | Clustered           | 3   | VC_87_4    | 3   | 0.0292 | 0.98125255 | 0.0286 | 0 | 0 | 0 | 1      | Ref |
| KY379511 | Unassigned | Unassigned | Unassigned | 927_0   | Clustered           | 5   | VC_927_0   | 5   | 0.4988 | 0.99999981 | 0.4988 | 0 | 0 | 0 | 1      | Ref |
| KY379853 | Unassigned | Unassigned | Unassigned | 654_0   | Clustered           | 115 | VC_654_0   | 115 | 0.7303 | 1          | 0.7303 | 0 | 0 | 0 | 0.8764 | Ref |
| KY380102 | Unassigned | Unassigned | Unassigned | 243_0   | Clustered           | 72  | VC_243_0   | 72  | 0.8089 | 1          | 0.8089 | 0 | 0 | 0 | 1      | Ref |
| KY381600 | Unassigned | Unassigned | Unassigned | 650_1   | Clustered           | 6   | VC_650_1   | 6   | 0.4186 | 1          | 0.4186 | 0 | 0 | 0 | 1      | Ref |
| KY385380 | Unassigned | Unassigned | Unassigned | 384_13  | Clustered           | 33  | VC_384_13  | 33  | 0.1785 | 1          | 0.1785 | 0 | 0 | 0 | 0.8769 | Ref |
| KY385381 | Unassigned | Unassigned | Unassigned | 786_0   | Clustered           | 4   | VC_786_0   | 4   | 0.3519 | 0.99997469 | 0.3519 | 0 | 0 | 0 | 1      | Ref |
| KY385382 | Unassigned | Unassigned | Unassigned | 384_13  | Clustered           | 33  | VC_384_13  | 33  | 0.1785 | 1          | 0.1785 | 0 | 0 | 0 | 0.8769 | Ref |
| KY385383 | Unassigned | Unassigned | Unassigned | 384_13  | Clustered           | 33  | VC_384_13  | 33  | 0.1785 | 1          | 0.1785 | 0 | 0 | 0 | 0.8769 | Ref |
| KY385384 | Unassigned | Unassigned | Unassigned | 538_53  | Clustered/Singleton | 1   | VC_538_53  | 1   | 0      | 1          | 0      | 0 | 0 | 0 | 1      | Ref |
| KY385423 | Unassigned | Unassigned | Unassigned | 113_0   | Clustered           | 91  | VC_113_0   | 91  | 0.9584 | 1          | 0.9584 | 0 | 0 | 0 | 1      | Ref |



|          |            |            |            |         |           |              |     |        |            |        |   |   |   |        |     |
|----------|------------|------------|------------|---------|-----------|--------------|-----|--------|------------|--------|---|---|---|--------|-----|
| KY389063 | Unassigned | Unassigned | Unassigned | 7_0     | Clustered | 28 VC_7_0    | 28  | 0.389  | 1          | 0.389  | 0 | 0 | 0 | 0.9947 | Ref |
| KY389064 | Unassigned | Unassigned | Unassigned | 7_0     | Clustered | 28 VC_7_0    | 28  | 0.389  | 1          | 0.389  | 0 | 0 | 0 | 0.9947 | Ref |
| KY389315 | Unassigned | Unassigned | Unassigned | 848_0   | Clustered | 124 VC_848_0 | 124 | 0.9484 | 1          | 0.9484 | 0 | 0 | 0 | 1      | Ref |
| KY389316 | Unassigned | Unassigned | Unassigned | 848_0   | Clustered | 124 VC_848_0 | 124 | 0.9484 | 1          | 0.9484 | 0 | 0 | 0 | 1      | Ref |
| KY398841 | Unassigned | Unassigned | Unassigned | 470_0   | Clustered | 62 VC_470_0  | 62  | 0.902  | 1          | 0.902  | 0 | 0 | 0 | 1      | Ref |
| KY434670 | Unassigned | Unassigned | Unassigned | 985_0   | Clustered | 38 VC_985_0  | 38  | 0.9334 | 1          | 0.9334 | 0 | 0 | 0 | 1      | Ref |
| KY435490 | Unassigned | Unassigned | Unassigned | 466_0   | Clustered | 66 VC_466_0  | 66  | 0.9246 | 1          | 0.9246 | 0 | 0 | 0 | 1      | Ref |
| KY448244 | Unassigned | Unassigned | Unassigned | 68_0    | Clustered | 2 VC_68_0    | 2   | 0.0139 | 0.69357611 | 0.0097 | 0 | 0 | 0 | 1      | Ref |
| KY450753 | Unassigned | Unassigned | Unassigned | 848_0   | Clustered | 124 VC_848_0 | 124 | 0.9484 | 1          | 0.9484 | 0 | 0 | 0 | 1      | Ref |
| KY464836 | Unassigned | Unassigned | Unassigned | 71_0    | Clustered | 27 VC_71_0   | 27  | 0.5964 | 1          | 0.5964 | 0 | 0 | 0 | 0.9943 | Ref |
| KY464936 | Unassigned | Unassigned | Unassigned | 531_0   | Clustered | 32 VC_531_0  | 32  | 0.6859 | 1          | 0.6859 | 0 | 0 | 0 | 1      | Ref |
| KY471266 | Unassigned | Unassigned | Unassigned | 535_1   | Clustered | 108 VC_535_1 | 108 | 0.8479 | 1          | 0.8479 | 0 | 0 | 0 | 0.9955 | Ref |
| KY471267 | Unassigned | Unassigned | Unassigned | 538_27  | Clustered | 2 VC_538_27  | 2   | 0.0141 | 0.95761635 | 0.0135 | 0 | 0 | 0 | 1      | Ref |
| KY471268 | Unassigned | Unassigned | Unassigned | 419_0   | Clustered | 11 VC_419_0  | 11  | 0.9465 | 1          | 0.9465 | 0 | 0 | 0 | 1      | Ref |
| KY471269 | Unassigned | Unassigned | Unassigned | 419_0   | Clustered | 11 VC_419_0  | 11  | 0.9465 | 1          | 0.9465 | 0 | 0 | 0 | 1      | Ref |
| KY471460 | Unassigned | Unassigned | Unassigned | 228_0   | Clustered | 22 VC_228_0  | 22  | 0.7411 | 1          | 0.7411 | 0 | 0 | 0 | 1      | Ref |
| KY472224 | Unassigned | Unassigned | Unassigned | 110_0   | Clustered | 33 VC_110_0  | 33  | 0.9488 | 1          | 0.9488 | 0 | 0 | 0 | 1      | Ref |
| KY514263 | Unassigned | Unassigned | Unassigned | 873_2   | Clustered | 2 VC_873_2   | 2   | 0.0245 | 0.87022547 | 0.0213 | 0 | 0 | 0 | 1      | Ref |
| KY514264 | Unassigned | Unassigned | Unassigned | 865_0   | Clustered | 10 VC_865_0  | 10  | 0.5975 | 1          | 0.5975 | 0 | 0 | 0 | 1      | Ref |
| KY514265 | Unassigned | Unassigned | Unassigned | 865_0   | Clustered | 10 VC_865_0  | 10  | 0.5975 | 1          | 0.5975 | 0 | 0 | 0 | 1      | Ref |
| KY549152 | Unassigned | Unassigned | Unassigned | 571_7   | Clustered | 28 VC_571_7  | 28  | 0.1651 | 1          | 0.1651 | 0 | 0 | 0 | 0.8519 | Ref |
| KY549153 | Unassigned | Unassigned | Unassigned | 991_0   | Clustered | 39 VC_991_0  | 39  | 1      | 1          | 1      | 0 | 0 | 0 | 1      | Ref |
| KY549154 | Unassigned | Unassigned | Unassigned | 991_0   | Clustered | 39 VC_991_0  | 39  | 1      | 1          | 1      | 0 | 0 | 0 | 1      | Ref |
| KY549155 | Unassigned | Unassigned | Unassigned | 535_1   | Clustered | 108 VC_535_1 | 108 | 0.8479 | 1          | 0.8479 | 0 | 0 | 0 | 0.9955 | Ref |
| KY549443 | Unassigned | Unassigned | Unassigned | 94_0    | Clustered | 22 VC_94_0   | 22  | 0.5602 | 1          | 0.5602 | 0 | 0 | 0 | 1      | Ref |
| KY549659 | Unassigned | Unassigned | Unassigned | 865_0   | Clustered | 10 VC_865_0  | 10  | 0.5975 | 1          | 0.5975 | 0 | 0 | 0 | 1      | Ref |
| KY554760 | Unassigned | Unassigned | Unassigned | 210_0   | Clustered | 105 VC_210_0 | 105 | 0.4076 | 1          | 0.4076 | 0 | 0 | 0 | 0.7766 | Ref |
| KY554761 | Unassigned | Unassigned | Unassigned | 210_0   | Clustered | 105 VC_210_0 | 105 | 0.4076 | 1          | 0.4076 | 0 | 0 | 0 | 0.7766 | Ref |
| KY554762 | Unassigned | Unassigned | Unassigned | 552_0   | Clustered | 9 VC_552_0   | 9   | 1      | 1          | 1      | 0 | 0 | 0 | 1      | Ref |
| KY554763 | Unassigned | Unassigned | Unassigned | 552_0   | Clustered | 9 VC_552_0   | 9   | 1      | 1          | 1      | 0 | 0 | 0 | 1      | Ref |
| KY554764 | Unassigned | Unassigned | Unassigned | 552_0   | Clustered | 9 VC_552_0   | 9   | 1      | 1          | 1      | 0 | 0 | 0 | 1      | Ref |
| KY554765 | Unassigned | Unassigned | Unassigned | 552_0   | Clustered | 9 VC_552_0   | 9   | 1      | 1          | 1      | 0 | 0 | 0 | 1      | Ref |
| KY554766 | Unassigned | Unassigned | Unassigned | 552_0   | Clustered | 9 VC_552_0   | 9   | 1      | 1          | 1      | 0 | 0 | 0 | 1      | Ref |
| KY554767 | Unassigned | Unassigned | Unassigned | 552_0   | Clustered | 9 VC_552_0   | 9   | 1      | 1          | 1      | 0 | 0 | 0 | 1      | Ref |
| KY554768 | Unassigned | Unassigned | Unassigned | 488_0   | Clustered | 14 VC_488_0  | 14  | 0.8516 | 1          | 0.8516 | 0 | 0 | 0 | 1      | Ref |
| KY554769 | Unassigned | Unassigned | Unassigned | 488_0   | Clustered | 14 VC_488_0  | 14  | 0.8516 | 1          | 0.8516 | 0 | 0 | 0 | 1      | Ref |
| KY554770 | Unassigned | Unassigned | Unassigned | 488_0   | Clustered | 14 VC_488_0  | 14  | 0.8516 | 1          | 0.8516 | 0 | 0 | 0 | 1      | Ref |
| KY554771 | Unassigned | Unassigned | Unassigned | 488_0   | Clustered | 14 VC_488_0  | 14  | 0.8516 | 1          | 0.8516 | 0 | 0 | 0 | 1      | Ref |
| KY554772 | Unassigned | Unassigned | Unassigned | 488_0   | Clustered | 14 VC_488_0  | 14  | 0.8516 | 1          | 0.8516 | 0 | 0 | 0 | 1      | Ref |
| KY554773 | Unassigned | Unassigned | Unassigned | 488_0   | Clustered | 14 VC_488_0  | 14  | 0.8516 | 1          | 0.8516 | 0 | 0 | 0 | 1      | Ref |
| KY554774 | Unassigned | Unassigned | Unassigned | 488_0   | Clustered | 14 VC_488_0  | 14  | 0.8516 | 1          | 0.8516 | 0 | 0 | 0 | 1      | Ref |
| KY554775 | Unassigned | Unassigned | Unassigned | 488_0   | Clustered | 14 VC_488_0  | 14  | 0.8516 | 1          | 0.8516 | 0 | 0 | 0 | 1      | Ref |
| KY554776 | Unassigned | Unassigned | Unassigned | 488_0   | Clustered | 14 VC_488_0  | 14  | 0.8516 | 1          | 0.8516 | 0 | 0 | 0 | 1      | Ref |
| KY554777 | Unassigned | Unassigned | Unassigned | 488_0   | Clustered | 14 VC_488_0  | 14  | 0.8516 | 1          | 0.8516 | 0 | 0 | 0 | 1      | Ref |
| KY555142 | Unassigned | Unassigned | Unassigned | 1011_4  | Clustered | 11 VC_1011_4 | 11  | 0.3331 | 1          | 0.3331 | 0 | 0 | 0 | 1      | Ref |
| KY555143 | Unassigned | Unassigned | Unassigned | 1011_4  | Clustered | 11 VC_1011_4 | 11  | 0.3331 | 1          | 0.3331 | 0 | 0 | 0 | 1      | Ref |
| KY555144 | Unassigned | Unassigned | Unassigned | 1011_4  | Clustered | 11 VC_1011_4 | 11  | 0.3331 | 1          | 0.3331 | 0 | 0 | 0 | 1      | Ref |
| KY555145 | Unassigned | Unassigned | Unassigned | 1011_4  | Clustered | 11 VC_1011_4 | 11  | 0.3331 | 1          | 0.3331 | 0 | 0 | 0 | 1      | Ref |
| KY555146 | Unassigned | Unassigned | Unassigned | 1011_4  | Clustered | 11 VC_1011_4 | 11  | 0.3331 | 1          | 0.3331 | 0 | 0 | 0 | 1      | Ref |
| KY555147 | Unassigned | Unassigned | Unassigned | 1011_4  | Clustered | 11 VC_1011_4 | 11  | 0.3331 | 1          | 0.3331 | 0 | 0 | 0 | 1      | Ref |
| KY563228 | Unassigned | Unassigned | Unassigned | 618_0   | Clustered | 50 VC_618_0  | 50  | 0.9989 | 1          | 0.9989 | 0 | 0 | 0 | 1      | Ref |
| KY565347 | Unassigned | Unassigned | Unassigned | 103_0   | Clustered | 3 VC_103_0   | 3   | 0.369  | 0.99763908 | 0.3682 | 0 | 0 | 0 | 1      | Ref |
| KY566218 | Unassigned | Unassigned | Unassigned | 421_0   | Clustered | 9 VC_421_0   | 9   | 0.855  | 1          | 0.855  | 0 | 0 | 0 | 1      | Ref |
| KY575286 | Unassigned | Unassigned | Unassigned | 972_0   | Clustered | 99 VC_972_0  | 99  | 0.9113 | 1          | 0.9113 | 0 | 0 | 0 | 0.9928 | Ref |
| KY579375 | Unassigned | Unassigned | Unassigned | 618_0   | Clustered | 50 VC_618_0  | 50  | 0.9989 | 1          | 0.9989 | 0 | 0 | 0 | 1      | Ref |
| KY581279 | Unassigned | Unassigned | Unassigned | 155_8   | Clustered | 66 VC_155_8  | 66  | 0.4537 | 1          | 0.4537 | 0 | 0 | 0 | 0.8182 | Ref |
| KY593455 | Unassigned | Unassigned | Unassigned | 508_3   | Clustered | 2 VC_508_3   | 2   | 0.0132 | 0.95703149 | 0.0126 | 0 | 0 | 0 | 1      | Ref |
| KY608966 | Unassigned | Unassigned | Unassigned | 440_0   | Clustered | 33 VC_440_0  | 33  | 0.992  | 1          | 0.992  | 0 | 0 | 0 | 1      | Ref |
| KY608967 | Unassigned | Unassigned | Unassigned | 290_109 | Clustered | 2 VC_290_109 | 2   | 0.0026 | 0.91436748 | 0.0024 | 0 | 0 | 0 | 1      | Ref |
| KY612839 | Unassigned | Unassigned | Unassigned | 806_0   | Clustered | 6 VC_806_0   | 6   | 0.5468 | 1          | 0.5468 | 0 | 0 | 0 | 1      | Ref |
| KY613597 | Unassigned | Unassigned | Unassigned | 421_0   | Clustered | 9 VC_421_0   | 9   | 0.855  | 1          | 0.855  | 0 | 0 | 0 | 1      | Ref |
| KY618819 | Unassigned | Unassigned | Unassigned | 434_0   | Clustered | 45 VC_434_0  | 45  | 0.9479 | 1          | 0.9479 | 0 | 0 | 0 | 1      | Ref |
| KY620117 | Unassigned | Unassigned | Unassigned | 611_0   | Clustered | 50 VC_611_0  | 50  | 0.7306 | 1          | 0.7306 | 0 | 0 | 0 | 1      | Ref |
| KY622015 | Unassigned | Unassigned | Unassigned | 515_0   | Clustered | 8 VC_515_0   | 8   | 0.3973 | 1          | 0.3973 | 0 | 0 | 0 | 1      | Ref |
| KY624610 | Unassigned | Unassigned | Unassigned | 421_0   | Clustered | 9 VC_421_0   | 9   | 0.855  | 1          | 0.855  | 0 | 0 | 0 | 1      | Ref |
| KY624611 | Unassigned | Unassigned | Unassigned | 421_0   | Clustered | 9 VC_421_0   | 9   | 0.855  | 1          | 0.855  | 0 | 0 | 0 | 1      | Ref |
| KY624612 | Unassigned | Unassigned | Unassigned | 421_0   | Clustered | 9 VC_421_0   | 9   | 0.855  | 1          | 0.855  | 0 | 0 | 0 | 1      | Ref |
| KY624613 | Unassigned | Unassigned | Unassigned | 421_0   | Clustered | 9 VC_421_0   | 9   | 0.855  | 1          | 0.855  | 0 | 0 | 0 | 1      | Ref |
| KY624614 | Unassigned | Unassigned | Unassigned | 421_0   | Clustered | 9 VC_421_0   | 9   | 0.855  | 1          | 0.855  | 0 | 0 | 0 | 1      | Ref |
| KY624615 | Unassigned | Unassigned | Unassigned | 421_0   | Clustered | 9 VC_421_0   | 9   | 0.855  | 1          | 0.855  | 0 | 0 | 0 | 1      | Ref |
| KY624616 | Unassigned | Unassigned | Unassigned | 421_0   | Clustered | 9 VC_421_0   | 9   | 0.855  | 1          | 0.855  | 0 | 0 | 0 | 1      | Ref |
| KY626162 | Unassigned | Unassigned | Unassigned | 340_1   | Clustered | 17 VC_340_1  | 17  | 0.0863 | 1          | 0.0863 | 0 | 0 | 0 | 0.8235 | Ref |
| KY626163 | Unassigned | Unassigned | Unassigned | 654_0   | Clustered | 115 VC_654_0 | 115 | 0.7303 | 1          | 0.7303 | 0 | 0 | 0 | 0.8764 | Ref |
| KY626176 | Unassigned | Unassigned | Unassigned | 1067_0  | Clustered | 20 VC_1067_0 | 20  | 0.7109 | 1          | 0.7109 | 0 | 0 | 0 | 1      | Ref |
| KY626177 | Unassigned | Unassigned | Unassigned | 1067_0  | Clustered | 20 VC_1067_0 | 20  | 0.7109 | 1          | 0.7109 | 0 | 0 | 0 | 1      | Ref |
| KY629563 | Unassigned | Unassigned | Unassigned | 1013_0  | Clustered | 2 VC_1013_0  | 2   | 0.0455 | 0.94948967 | 0.0432 | 0 | 0 | 0 | 1      | Ref |
| KY630163 | Unassigned | Unassigned | Unassigned | 135_34  | Clustered | 3 VC_135_34  | 3   | 0.0102 | 0.97231548 | 0.0099 | 0 | 0 | 0 | 0.6667 | Ref |
| KY630187 | Unassigned | Unassigned | Unassigned | 170_7   | Clustered | 7 VC_170_7   | 7   | 0.0952 | 0.99874946 | 0.0951 | 0 | 0 | 0 | 1      | Ref |
| KY652723 | Unassigned | Unassigned | Unassigned | 848_0   | Clustered | 124 VC_848_0 | 124 | 0.9484 | 1          | 0.9484 | 0 | 0 | 0 | 1      | Ref |
| KY652724 | Unassigned | Unassigned | Unassigned | 848_0   | Clustered | 124 VC_848_0 | 124 | 0.9484 | 1          | 0.9484 | 0 | 0 | 0 | 1      | Ref |
| KY652725 | Unassigned | Unassigned | Unassigned | 848_0   | Clustered | 124 VC_848_0 | 124 | 0.9484 | 1          | 0.9484 | 0 | 0 | 0 | 1      | Ref |



|          |            |            |            |        |           |              |     |        |            |        |   |   |   |        |     |
|----------|------------|------------|------------|--------|-----------|--------------|-----|--------|------------|--------|---|---|---|--------|-----|
| KY652726 | Unassigned | Unassigned | Unassigned | 601_3  | Clustered | 12 VC_601_3  | 12  | 0.2339 | 1          | 0.2339 | 0 | 0 | 0 | 0.8636 | Ref |
| KY653123 | Unassigned | Unassigned | Unassigned | 10_0   | Clustered | 25 VC_10_0   | 25  | 0.3437 | 1          | 0.3437 | 0 | 0 | 0 | 0.9733 | Ref |
| KY653125 | Unassigned | Unassigned | Unassigned | 7_0    | Clustered | 28 VC_7_0    | 28  | 0.389  | 1          | 0.389  | 0 | 0 | 0 | 0.9947 | Ref |
| KY653237 | Unassigned | Unassigned | Unassigned | 310_0  | Clustered | 155 VC_310_0 | 155 | 0.9979 | 1          | 0.9979 | 0 | 0 | 0 | 1      | Ref |
| KY654690 | Unassigned | Unassigned | Unassigned | 341_0  | Clustered | 27 VC_341_0  | 27  | 0.5058 | 1          | 0.5058 | 0 | 0 | 0 | 0.8661 | Ref |
| KY657202 | Unassigned | Unassigned | Unassigned | 603_0  | Clustered | 28 VC_603_0  | 28  | 0.7692 | 1          | 0.7692 | 0 | 0 | 0 | 1      | Ref |
| KY658673 | Unassigned | Unassigned | Unassigned | 306_0  | Clustered | 24 VC_306_0  | 24  | 0.9902 | 1          | 0.9902 | 0 | 0 | 0 | 1      | Ref |
| KY658674 | Unassigned | Unassigned | Unassigned | 306_0  | Clustered | 24 VC_306_0  | 24  | 0.9902 | 1          | 0.9902 | 0 | 0 | 0 | 1      | Ref |
| KY658675 | Unassigned | Unassigned | Unassigned | 306_0  | Clustered | 24 VC_306_0  | 24  | 0.9902 | 1          | 0.9902 | 0 | 0 | 0 | 1      | Ref |
| KY658676 | Unassigned | Unassigned | Unassigned | 306_0  | Clustered | 24 VC_306_0  | 24  | 0.9902 | 1          | 0.9902 | 0 | 0 | 0 | 1      | Ref |
| KY658677 | Unassigned | Unassigned | Unassigned | 306_0  | Clustered | 24 VC_306_0  | 24  | 0.9902 | 1          | 0.9902 | 0 | 0 | 0 | 1      | Ref |
| KY658678 | Unassigned | Unassigned | Unassigned | 306_0  | Clustered | 24 VC_306_0  | 24  | 0.9902 | 1          | 0.9902 | 0 | 0 | 0 | 1      | Ref |
| KY658679 | Unassigned | Unassigned | Unassigned | 306_0  | Clustered | 24 VC_306_0  | 24  | 0.9902 | 1          | 0.9902 | 0 | 0 | 0 | 1      | Ref |
| KY658680 | Unassigned | Unassigned | Unassigned | 306_0  | Clustered | 24 VC_306_0  | 24  | 0.9902 | 1          | 0.9902 | 0 | 0 | 0 | 1      | Ref |
| KY661963 | Unassigned | Unassigned | Unassigned | 745_0  | Clustered | 9 VC_745_0   | 9   | 0.9955 | 0.99999771 | 0.9955 | 0 | 0 | 0 | 1      | Ref |
| KY670595 | Unassigned | Unassigned | Unassigned | 713_0  | Clustered | 26 VC_713_0  | 26  | 0.9358 | 1          | 0.9358 | 0 | 0 | 0 | 1      | Ref |
| KY676783 | Unassigned | Unassigned | Unassigned | 384_15 | Clustered | 44 VC_384_15 | 44  | 0.139  | 1          | 0.139  | 0 | 0 | 0 | 0.7474 | Ref |
| KY676784 | Unassigned | Unassigned | Unassigned | 742_0  | Clustered | 11 VC_742_0  | 11  | 0.5046 | 1          | 0.5046 | 0 | 0 | 0 | 1      | Ref |
| KY677846 | Unassigned | Unassigned | Unassigned | 198_15 | Clustered | 3 VC_198_15  | 3   | 0.0144 | 0.99754982 | 0.0144 | 0 | 0 | 0 | 0.6667 | Ref |
| KY683735 | Unassigned | Unassigned | Unassigned | 609_0  | Clustered | 27 VC_609_0  | 27  | 0.9943 | 1          | 0.9943 | 0 | 0 | 0 | 1      | Ref |
| KY683736 | Unassigned | Unassigned | Unassigned | 794_9  | Clustered | 7 VC_794_9   | 7   | 0.0369 | 0.87330366 | 0.0322 | 0 | 0 | 0 | 1      | Ref |
| KY684082 | Unassigned | Unassigned | Unassigned | 113_0  | Clustered | 91 VC_113_0  | 91  | 0.9584 | 1          | 0.9584 | 0 | 0 | 0 | 1      | Ref |
| KY694971 | Unassigned | Unassigned | Unassigned | 603_0  | Clustered | 28 VC_603_0  | 28  | 0.7692 | 1          | 0.7692 | 0 | 0 | 0 | 1      | Ref |
| KY695153 | Unassigned | Unassigned | Unassigned | 7_0    | Clustered | 28 VC_7_0    | 28  | 0.389  | 1          | 0.389  | 0 | 0 | 0 | 0.9947 | Ref |
| KY703222 | Unassigned | Unassigned | Unassigned | 293_10 | Clustered | 9 VC_293_10  | 9   | 0.0615 | 0.99999884 | 0.0615 | 0 | 0 | 0 | 0.6667 | Ref |
| KY705251 | Unassigned | Unassigned | Unassigned | 258_0  | Clustered | 121 VC_258_0 | 121 | 0.7359 | 1          | 0.7359 | 0 | 0 | 0 | 0.9999 | Ref |
| KY705252 | Unassigned | Unassigned | Unassigned | 261_0  | Clustered | 13 VC_261_0  | 13  | 0.2024 | 1          | 0.2024 | 0 | 0 | 0 | 1      | Ref |
| KY705253 | Unassigned | Unassigned | Unassigned | 261_0  | Clustered | 13 VC_261_0  | 13  | 0.2024 | 1          | 0.2024 | 0 | 0 | 0 | 1      | Ref |
| KY705254 | Unassigned | Unassigned | Unassigned | 261_0  | Clustered | 13 VC_261_0  | 13  | 0.2024 | 1          | 0.2024 | 0 | 0 | 0 | 1      | Ref |
| KY705255 | Unassigned | Unassigned | Unassigned | 261_0  | Clustered | 13 VC_261_0  | 13  | 0.2024 | 1          | 0.2024 | 0 | 0 | 0 | 1      | Ref |
| KY705256 | Unassigned | Unassigned | Unassigned | 258_0  | Clustered | 121 VC_258_0 | 121 | 0.7359 | 1          | 0.7359 | 0 | 0 | 0 | 0.9999 | Ref |
| KY705257 | Unassigned | Unassigned | Unassigned | 258_0  | Clustered | 121 VC_258_0 | 121 | 0.7359 | 1          | 0.7359 | 0 | 0 | 0 | 0.9999 | Ref |
| KY705258 | Unassigned | Unassigned | Unassigned | 260_0  | Clustered | 46 VC_260_0  | 46  | 0.5137 | 1          | 0.5137 | 0 | 0 | 0 | 1      | Ref |
| KY705259 | Unassigned | Unassigned | Unassigned | 258_0  | Clustered | 121 VC_258_0 | 121 | 0.7359 | 1          | 0.7359 | 0 | 0 | 0 | 0.9999 | Ref |
| KY705260 | Unassigned | Unassigned | Unassigned | 258_0  | Clustered | 121 VC_258_0 | 121 | 0.7359 | 1          | 0.7359 | 0 | 0 | 0 | 0.9999 | Ref |
| KY705261 | Unassigned | Unassigned | Unassigned | 258_0  | Clustered | 121 VC_258_0 | 121 | 0.7359 | 1          | 0.7359 | 0 | 0 | 0 | 0.9999 | Ref |
| KY705262 | Unassigned | Unassigned | Unassigned | 258_0  | Clustered | 121 VC_258_0 | 121 | 0.7359 | 1          | 0.7359 | 0 | 0 | 0 | 0.9999 | Ref |
| KY705263 | Unassigned | Unassigned | Unassigned | 258_0  | Clustered | 121 VC_258_0 | 121 | 0.7359 | 1          | 0.7359 | 0 | 0 | 0 | 0.9999 | Ref |
| KY705264 | Unassigned | Unassigned | Unassigned | 258_0  | Clustered | 121 VC_258_0 | 121 | 0.7359 | 1          | 0.7359 | 0 | 0 | 0 | 0.9999 | Ref |
| KY705265 | Unassigned | Unassigned | Unassigned | 258_0  | Clustered | 121 VC_258_0 | 121 | 0.7359 | 1          | 0.7359 | 0 | 0 | 0 | 0.9999 | Ref |
| KY705266 | Unassigned | Unassigned | Unassigned | 258_0  | Clustered | 121 VC_258_0 | 121 | 0.7359 | 1          | 0.7359 | 0 | 0 | 0 | 0.9999 | Ref |
| KY705267 | Unassigned | Unassigned | Unassigned | 258_0  | Clustered | 121 VC_258_0 | 121 | 0.7359 | 1          | 0.7359 | 0 | 0 | 0 | 0.9999 | Ref |
| KY705268 | Unassigned | Unassigned | Unassigned | 260_0  | Clustered | 46 VC_260_0  | 46  | 0.5137 | 1          | 0.5137 | 0 | 0 | 0 | 1      | Ref |
| KY705269 | Unassigned | Unassigned | Unassigned | 260_0  | Clustered | 46 VC_260_0  | 46  | 0.5137 | 1          | 0.5137 | 0 | 0 | 0 | 1      | Ref |
| KY705270 | Unassigned | Unassigned | Unassigned | 258_0  | Clustered | 121 VC_258_0 | 121 | 0.7359 | 1          | 0.7359 | 0 | 0 | 0 | 0.9999 | Ref |
| KY705271 | Unassigned | Unassigned | Unassigned | 258_0  | Clustered | 121 VC_258_0 | 121 | 0.7359 | 1          | 0.7359 | 0 | 0 | 0 | 0.9999 | Ref |
| KY705272 | Unassigned | Unassigned | Unassigned | 258_0  | Clustered | 121 VC_258_0 | 121 | 0.7359 | 1          | 0.7359 | 0 | 0 | 0 | 0.9999 | Ref |
| KY705273 | Unassigned | Unassigned | Unassigned | 258_0  | Clustered | 121 VC_258_0 | 121 | 0.7359 | 1          | 0.7359 | 0 | 0 | 0 | 0.9999 | Ref |
| KY705274 | Unassigned | Unassigned | Unassigned | 258_0  | Clustered | 121 VC_258_0 | 121 | 0.7359 | 1          | 0.7359 | 0 | 0 | 0 | 0.9999 | Ref |
| KY705275 | Unassigned | Unassigned | Unassigned | 258_0  | Clustered | 121 VC_258_0 | 121 | 0.7359 | 1          | 0.7359 | 0 | 0 | 0 | 0.9999 | Ref |
| KY705276 | Unassigned | Unassigned | Unassigned | 258_0  | Clustered | 121 VC_258_0 | 121 | 0.7359 | 1          | 0.7359 | 0 | 0 | 0 | 0.9999 | Ref |
| KY705277 | Unassigned | Unassigned | Unassigned | 260_0  | Clustered | 46 VC_260_0  | 46  | 0.5137 | 1          | 0.5137 | 0 | 0 | 0 | 1      | Ref |
| KY705278 | Unassigned | Unassigned | Unassigned | 260_0  | Clustered | 46 VC_260_0  | 46  | 0.5137 | 1          | 0.5137 | 0 | 0 | 0 | 1      | Ref |
| KY705279 | Unassigned | Unassigned | Unassigned | 260_0  | Clustered | 46 VC_260_0  | 46  | 0.5137 | 1          | 0.5137 | 0 | 0 | 0 | 1      | Ref |
| KY705280 | Unassigned | Unassigned | Unassigned | 260_0  | Clustered | 46 VC_260_0  | 46  | 0.5137 | 1          | 0.5137 | 0 | 0 | 0 | 1      | Ref |
| KY705281 | Unassigned | Unassigned | Unassigned | 260_0  | Clustered | 46 VC_260_0  | 46  | 0.5137 | 1          | 0.5137 | 0 | 0 | 0 | 1      | Ref |
| KY705282 | Unassigned | Unassigned | Unassigned | 258_0  | Clustered | 121 VC_258_0 | 121 | 0.7359 | 1          | 0.7359 | 0 | 0 | 0 | 0.9999 | Ref |
| KY705283 | Unassigned | Unassigned | Unassigned | 258_0  | Clustered | 121 VC_258_0 | 121 | 0.7359 | 1          | 0.7359 | 0 | 0 | 0 | 0.9999 | Ref |
| KY705284 | Unassigned | Unassigned | Unassigned | 258_0  | Clustered | 121 VC_258_0 | 121 | 0.7359 | 1          | 0.7359 | 0 | 0 | 0 | 0.9999 | Ref |
| KY705285 | Unassigned | Unassigned | Unassigned | 260_0  | Clustered | 46 VC_260_0  | 46  | 0.5137 | 1          | 0.5137 | 0 | 0 | 0 | 1      | Ref |
| KY705286 | Unassigned | Unassigned | Unassigned | 260_0  | Clustered | 46 VC_260_0  | 46  | 0.5137 | 1          | 0.5137 | 0 | 0 | 0 | 1      | Ref |
| KY705287 | Unassigned | Unassigned | Unassigned | 258_0  | Clustered | 121 VC_258_0 | 121 | 0.7359 | 1          | 0.7359 | 0 | 0 | 0 | 0.9999 | Ref |
| KY705288 | Unassigned | Unassigned | Unassigned | 258_0  | Clustered | 121 VC_258_0 | 121 | 0.7359 | 1          | 0.7359 | 0 | 0 | 0 | 0.9999 | Ref |
| KY705289 | Unassigned | Unassigned | Unassigned | 258_0  | Clustered | 121 VC_258_0 | 121 | 0.7359 | 1          | 0.7359 | 0 | 0 | 0 | 0.9999 | Ref |
| KY705290 | Unassigned | Unassigned | Unassigned | 258_0  | Clustered | 121 VC_258_0 | 121 | 0.7359 | 1          | 0.7359 | 0 | 0 | 0 | 0.9999 | Ref |
| KY705409 | Unassigned | Unassigned | Unassigned | 127_0  | Clustered | 17 VC_127_0  | 17  | 0.9222 | 1          | 0.9222 | 0 | 0 | 0 | 1      | Ref |
| KY707339 | Unassigned | Unassigned | Unassigned | 764_0  | Clustered | 23 VC_764_0  | 23  | 0.8194 | 1          | 0.8194 | 0 | 0 | 0 | 1      | Ref |
| KY709296 | Unassigned | Unassigned | Unassigned | 817_0  | Clustered | 12 VC_817_0  | 12  | 0.8497 | 1          | 0.8497 | 0 | 0 | 0 | 1      | Ref |
| KY744228 | Unassigned | Unassigned | Unassigned | 360_0  | Clustered | 22 VC_360_0  | 22  | 0.96   | 1          | 0.96   | 0 | 0 | 0 | 1      | Ref |
| KY744229 | Unassigned | Unassigned | Unassigned | 360_0  | Clustered | 22 VC_360_0  | 22  | 0.96   | 1          | 0.96   | 0 | 0 | 0 | 1      | Ref |
| KY744230 | Unassigned | Unassigned | Unassigned | 360_0  | Clustered | 22 VC_360_0  | 22  | 0.96   | 1          | 0.96   | 0 | 0 | 0 | 1      | Ref |
| KY744231 | Unassigned | Unassigned | Unassigned | 360_0  | Clustered | 22 VC_360_0  | 22  | 0.96   | 1          | 0.96   | 0 | 0 | 0 | 1      | Ref |
| KY744232 | Unassigned | Unassigned | Unassigned | 360_0  | Clustered | 22 VC_360_0  | 22  | 0.96   | 1          | 0.96   | 0 | 0 | 0 | 1      | Ref |
| KY744233 | Unassigned | Unassigned | Unassigned | 360_0  | Clustered | 22 VC_360_0  | 22  | 0.96   | 1          | 0.96   | 0 | 0 | 0 | 1      | Ref |
| KY744234 | Unassigned | Unassigned | Unassigned | 360_0  | Clustered | 22 VC_360_0  | 22  | 0.96   | 1          | 0.96   | 0 | 0 | 0 | 1      | Ref |
| KY744235 | Unassigned | Unassigned | Unassigned | 360_0  | Clustered | 22 VC_360_0  | 22  | 0.96   | 1          | 0.96   | 0 | 0 | 0 | 1      | Ref |
| KY745466 | Unassigned | Unassigned | Unassigned | 466_0  | Clustered | 66 VC_466_0  | 66  | 0.9246 | 1          | 0.9246 | 0 | 0 | 0 | 1      | Ref |
| KY769270 | Unassigned | Unassigned | Unassigned | 865_0  | Clustered | 10 VC_865_0  | 10  | 0.5975 | 1          | 0.5975 | 0 | 0 | 0 | 1      | Ref |
| KY779848 | Unassigned | Unassigned | Unassigned | 159_0  | Clustered | 25 VC_159_0  | 25  | 0.7699 | 1          | 0.7699 | 0 | 0 | 0 | 1      | Ref |
| KY779849 | Unassigned | Unassigned | Unassigned | 155_15 | Clustered | 16 VC_155_15 | 16  | 0.0779 | 1          | 0.0779 | 0 | 0 | 0 | 0.8083 | Ref |
| KY780482 | Unassigned | Unassigned | Unassigned | 971_0  | Clustered | 40 VC_971_0  | 40  | 0.6793 | 1          | 0.6793 | 0 | 0 | 0 | 0.9359 | Ref |



|          |            |            |            |        |                     |              |     |        |            |        |   |   |   |            |
|----------|------------|------------|------------|--------|---------------------|--------------|-----|--------|------------|--------|---|---|---|------------|
| KY783914 | Unassigned | Unassigned | Unassigned | 785_2  | Clustered           | 7 VC_785_2   | 7   | 0.2595 | 1          | 0.2595 | 0 | 0 | 0 | 1 Ref      |
| KY787212 | Unassigned | Unassigned | Unassigned | 199_16 | Clustered           | 12 VC_199_16 | 12  | 0.064  | 1          | 0.064  | 0 | 0 | 0 | 0.9394 Ref |
| KY787213 | Unassigned | Unassigned | Unassigned | 135_34 | Clustered           | 3 VC_135_34  | 3   | 0.0102 | 0.97231548 | 0.0099 | 0 | 0 | 0 | 0.6667 Ref |
| KY794641 | Unassigned | Unassigned | Unassigned | 155_10 | Clustered/Singleton | 1 VC_155_10  | 1   | 0      | 1          | 0      | 0 | 0 | 0 | 1 Ref      |
| KY794642 | Unassigned | Unassigned | Unassigned | 155_29 | Clustered           | 3 VC_155_29  | 3   | 0.0119 | 0.99412742 | 0.0118 | 0 | 0 | 0 | 1 Ref      |
| KY794643 | Unassigned | Unassigned | Unassigned | 155_29 | Clustered           | 3 VC_155_29  | 3   | 0.0119 | 0.99412742 | 0.0118 | 0 | 0 | 0 | 1 Ref      |
| KY798120 | Unassigned | Unassigned | Unassigned | 131_0  | Clustered           | 43 VC_131_0  | 43  | 0.8853 | 1          | 0.8853 | 0 | 0 | 0 | 1 Ref      |
| KY798121 | Unassigned | Unassigned | Unassigned | 131_0  | Clustered           | 43 VC_131_0  | 43  | 0.8853 | 1          | 0.8853 | 0 | 0 | 0 | 1 Ref      |
| KY817360 | Unassigned | Unassigned | Unassigned | 1245_0 | Clustered           | 2 VC_1245_0  | 2   | 0.8888 | 0.81445332 | 0.7239 | 0 | 0 | 0 | 1 Ref      |
| KY821088 | Unassigned | Unassigned | Unassigned | 844_0  | Clustered           | 3 VC_844_0   | 3   | 0.0967 | 0.99840149 | 0.0966 | 0 | 0 | 0 | 1 Ref      |
| KY829116 | Unassigned | Unassigned | Unassigned | 713_0  | Clustered           | 26 VC_713_0  | 26  | 0.9358 | 1          | 0.9358 | 0 | 0 | 0 | 1 Ref      |
| KY853667 | Unassigned | Unassigned | Unassigned | 183_0  | Clustered           | 5 VC_183_0   | 5   | 0.7449 | 0.99885646 | 0.744  | 0 | 0 | 0 | 1 Ref      |
| KY860935 | Unassigned | Unassigned | Unassigned | 475_0  | Clustered           | 96 VC_475_0  | 96  | 0.9303 | 1          | 0.9303 | 0 | 0 | 0 | 0.9575 Ref |
| KY883634 | Unassigned | Unassigned | Unassigned | 513_1  | Clustered           | 41 VC_513_1  | 41  | 0.3276 | 1          | 0.3276 | 0 | 0 | 0 | 0.911 Ref  |
| KY883635 | Unassigned | Unassigned | Unassigned | 513_1  | Clustered           | 41 VC_513_1  | 41  | 0.3276 | 1          | 0.3276 | 0 | 0 | 0 | 0.911 Ref  |
| KY883636 | Unassigned | Unassigned | Unassigned | 513_1  | Clustered           | 41 VC_513_1  | 41  | 0.3276 | 1          | 0.3276 | 0 | 0 | 0 | 0.911 Ref  |
| KY883637 | Unassigned | Unassigned | Unassigned | 513_1  | Clustered           | 41 VC_513_1  | 41  | 0.3276 | 1          | 0.3276 | 0 | 0 | 0 | 0.911 Ref  |
| KY883638 | Unassigned | Unassigned | Unassigned | 513_0  | Clustered           | 39 VC_513_0  | 39  | 0.3078 | 1          | 0.3078 | 0 | 0 | 0 | 1 Ref      |
| KY883639 | Unassigned | Unassigned | Unassigned | 513_0  | Clustered           | 39 VC_513_0  | 39  | 0.3078 | 1          | 0.3078 | 0 | 0 | 0 | 1 Ref      |
| KY883640 | Unassigned | Unassigned | Unassigned | 513_0  | Clustered           | 39 VC_513_0  | 39  | 0.3078 | 1          | 0.3078 | 0 | 0 | 0 | 1 Ref      |
| KY883641 | Unassigned | Unassigned | Unassigned | 83_0   | Clustered           | 24 VC_83_0   | 24  | 0.7345 | 1          | 0.7345 | 0 | 0 | 0 | 1 Ref      |
| KY883642 | Unassigned | Unassigned | Unassigned | 627_0  | Clustered           | 16 VC_627_0  | 16  | 0.9168 | 1          | 0.9168 | 0 | 0 | 0 | 1 Ref      |
| KY883643 | Unassigned | Unassigned | Unassigned | 83_0   | Clustered           | 24 VC_83_0   | 24  | 0.7345 | 1          | 0.7345 | 0 | 0 | 0 | 1 Ref      |
| KY883644 | Unassigned | Unassigned | Unassigned | 83_0   | Clustered           | 24 VC_83_0   | 24  | 0.7345 | 1          | 0.7345 | 0 | 0 | 0 | 1 Ref      |
| KY883645 | Unassigned | Unassigned | Unassigned | 83_0   | Clustered           | 24 VC_83_0   | 24  | 0.7345 | 1          | 0.7345 | 0 | 0 | 0 | 1 Ref      |
| KY883646 | Unassigned | Unassigned | Unassigned | 83_0   | Clustered           | 24 VC_83_0   | 24  | 0.7345 | 1          | 0.7345 | 0 | 0 | 0 | 1 Ref      |
| KY883647 | Unassigned | Unassigned | Unassigned | 627_0  | Clustered           | 16 VC_627_0  | 16  | 0.9168 | 1          | 0.9168 | 0 | 0 | 0 | 1 Ref      |
| KY883648 | Unassigned | Unassigned | Unassigned | 83_0   | Clustered           | 24 VC_83_0   | 24  | 0.7345 | 1          | 0.7345 | 0 | 0 | 0 | 1 Ref      |
| KY883649 | Unassigned | Unassigned | Unassigned | 83_0   | Clustered           | 24 VC_83_0   | 24  | 0.7345 | 1          | 0.7345 | 0 | 0 | 0 | 1 Ref      |
| KY883650 | Unassigned | Unassigned | Unassigned | 83_0   | Clustered           | 24 VC_83_0   | 24  | 0.7345 | 1          | 0.7345 | 0 | 0 | 0 | 1 Ref      |
| KY883651 | Unassigned | Unassigned | Unassigned | 83_0   | Clustered           | 24 VC_83_0   | 24  | 0.7345 | 1          | 0.7345 | 0 | 0 | 0 | 1 Ref      |
| KY883652 | Unassigned | Unassigned | Unassigned | 83_0   | Clustered           | 24 VC_83_0   | 24  | 0.7345 | 1          | 0.7345 | 0 | 0 | 0 | 1 Ref      |
| KY883653 | Unassigned | Unassigned | Unassigned | 83_0   | Clustered           | 24 VC_83_0   | 24  | 0.7345 | 1          | 0.7345 | 0 | 0 | 0 | 1 Ref      |
| KY883654 | Unassigned | Unassigned | Unassigned | 1007_0 | Clustered           | 3 VC_1007_0  | 3   | 0.0541 | 0.99838914 | 0.0541 | 0 | 0 | 0 | 1 Ref      |
| KY883655 | Unassigned | Unassigned | Unassigned | 1007_0 | Clustered           | 3 VC_1007_0  | 3   | 0.0541 | 0.99838914 | 0.0541 | 0 | 0 | 0 | 1 Ref      |
| KY883656 | Unassigned | Unassigned | Unassigned | 627_0  | Clustered           | 16 VC_627_0  | 16  | 0.9168 | 1          | 0.9168 | 0 | 0 | 0 | 1 Ref      |
| KY883657 | Unassigned | Unassigned | Unassigned | 771_0  | Clustered           | 8 VC_771_0   | 8   | 0.7491 | 1          | 0.7491 | 0 | 0 | 0 | 1 Ref      |
| KY883658 | Unassigned | Unassigned | Unassigned | 771_0  | Clustered           | 8 VC_771_0   | 8   | 0.7491 | 1          | 0.7491 | 0 | 0 | 0 | 1 Ref      |
| KY888143 | Unassigned | Unassigned | Unassigned | 218_0  | Clustered           | 4 VC_218_0   | 4   | 0.1097 | 0.99998788 | 0.1097 | 0 | 0 | 0 | 1 Ref      |
| KY888680 | Unassigned | Unassigned | Unassigned | 714_0  | Clustered           | 71 VC_714_0  | 71  | 0.935  | 1          | 0.935  | 0 | 0 | 0 | 1 Ref      |
| KY888882 | Unassigned | Unassigned | Unassigned | 912_3  | Clustered           | 2 VC_912_3   | 2   | 0.0181 | 0.87900236 | 0.0159 | 0 | 0 | 0 | 1 Ref      |
| KY914478 | Unassigned | Unassigned | Unassigned | 44_0   | Clustered           | 49 VC_44_0   | 49  | 0.4506 | 1          | 0.4506 | 0 | 0 | 0 | 0.8605 Ref |
| KY921761 | Unassigned | Unassigned | Unassigned | 844_0  | Clustered           | 3 VC_844_0   | 3   | 0.0967 | 0.99840149 | 0.0966 | 0 | 0 | 0 | 1 Ref      |
| KY926698 | Unassigned | Unassigned | Unassigned | 218_0  | Clustered           | 4 VC_218_0   | 4   | 0.1097 | 0.99998788 | 0.1097 | 0 | 0 | 0 | 1 Ref      |
| KY926699 | Unassigned | Unassigned | Unassigned | 218_0  | Clustered           | 4 VC_218_0   | 4   | 0.1097 | 0.99998788 | 0.1097 | 0 | 0 | 0 | 1 Ref      |
| KY926791 | Unassigned | Unassigned | Unassigned | 737_0  | Clustered           | 13 VC_737_0  | 13  | 0.5083 | 1          | 0.5083 | 0 | 0 | 0 | 1 Ref      |
| KY926792 | Unassigned | Unassigned | Unassigned | 787_0  | Clustered           | 132 VC_787_0 | 132 | 1      | 1          | 1      | 0 | 0 | 0 | 1 Ref      |
| KY926793 | Unassigned | Unassigned | Unassigned | 787_0  | Clustered           | 132 VC_787_0 | 132 | 1      | 1          | 1      | 0 | 0 | 0 | 1 Ref      |
| KY939598 | Unassigned | Unassigned | Unassigned | 256_0  | Clustered           | 2 VC_256_0   | 2   | 0.0437 | 0.95611024 | 0.0418 | 0 | 0 | 0 | 1 Ref      |
| KY942056 | Unassigned | Unassigned | Unassigned | 133_0  | Clustered           | 17 VC_133_0  | 17  | 0.2654 | 1          | 0.2654 | 0 | 0 | 0 | 1 Ref      |
| KY942057 | Unassigned | Unassigned | Unassigned | 133_0  | Clustered           | 17 VC_133_0  | 17  | 0.2654 | 1          | 0.2654 | 0 | 0 | 0 | 1 Ref      |
| KY945355 | Unassigned | Unassigned | Unassigned | 244_2  | Clustered           | 11 VC_244_2  | 11  | 0.1403 | 1          | 0.1403 | 0 | 0 | 0 | 0.9818 Ref |
| KY947509 | Unassigned | Unassigned | Unassigned | 843_0  | Clustered           | 20 VC_843_0  | 20  | 0.9621 | 1          | 0.9621 | 0 | 0 | 0 | 1 Ref      |
| KY951963 | Unassigned | Unassigned | Unassigned | 944_0  | Clustered           | 76 VC_944_0  | 76  | 0.9789 | 1          | 0.9789 | 0 | 0 | 0 | 1 Ref      |
| KY951964 | Unassigned | Unassigned | Unassigned | 944_0  | Clustered           | 76 VC_944_0  | 76  | 0.9789 | 1          | 0.9789 | 0 | 0 | 0 | 1 Ref      |
| KY953156 | Unassigned | Unassigned | Unassigned | 1018_0 | Clustered           | 38 VC_1018_0 | 38  | 0.9757 | 1          | 0.9757 | 0 | 0 | 0 | 1 Ref      |
| KY962008 | Unassigned | Unassigned | Unassigned | 465_0  | Clustered           | 80 VC_465_0  | 80  | 0.9988 | 1          | 0.9988 | 0 | 0 | 0 | 1 Ref      |
| KY963369 | Unassigned | Unassigned | Unassigned | 719_0  | Clustered           | 16 VC_719_0  | 16  | 0.728  | 1          | 0.728  | 0 | 0 | 0 | 1 Ref      |
| KY963370 | Unassigned | Unassigned | Unassigned | 719_0  | Clustered           | 16 VC_719_0  | 16  | 0.728  | 1          | 0.728  | 0 | 0 | 0 | 1 Ref      |
| KY963371 | Unassigned | Unassigned | Unassigned | 719_0  | Clustered           | 16 VC_719_0  | 16  | 0.728  | 1          | 0.728  | 0 | 0 | 0 | 1 Ref      |
| KY963424 | Unassigned | Unassigned | Unassigned | 198_23 | Clustered           | 10 VC_198_23 | 10  | 0.0697 | 1          | 0.0697 | 0 | 0 | 0 | 0.8444 Ref |
| KY965063 | Unassigned | Unassigned | Unassigned | 532_0  | Clustered           | 75 VC_532_0  | 75  | 0.9393 | 1          | 0.9393 | 0 | 0 | 0 | 1 Ref      |
| KY965064 | Unassigned | Unassigned | Unassigned | 538_40 | Clustered           | 4 VC_538_40  | 4   | 0.0395 | 0.99998776 | 0.0394 | 0 | 0 | 0 | 1 Ref      |
| KY965065 | Unassigned | Unassigned | Unassigned | 223_6  | Clustered           | 42 VC_223_6  | 42  | 0.4717 | 1          | 0.4717 | 0 | 0 | 0 | 0.8351 Ref |
| KY965066 | Unassigned | Unassigned | Unassigned | 384_18 | Clustered           | 10 VC_384_18 | 10  | 0.0301 | 1          | 0.0301 | 0 | 0 | 0 | 0.8 Ref    |
| KY965934 | Unassigned | Unassigned | Unassigned | 997_0  | Clustered           | 4 VC_997_0   | 4   | 0.8491 | 0.99879268 | 0.8481 | 0 | 0 | 0 | 1 Ref      |
| KY969628 | Unassigned | Unassigned | Unassigned | 588_0  | Clustered           | 8 VC_588_0   | 8   | 0.5695 | 1          | 0.5695 | 0 | 0 | 0 | 1 Ref      |
| KY971610 | Unassigned | Unassigned | Unassigned | 294_1  | Clustered/Singleton | 1 VC_294_1   | 1   | 0      | 1          | 0      | 0 | 0 | 0 | 1 Ref      |
| KY971611 | Unassigned | Unassigned | Unassigned | 131_0  | Clustered           | 43 VC_131_0  | 43  | 0.8853 | 1          | 0.8853 | 0 | 0 | 0 | 1 Ref      |
| KY979235 | Unassigned | Unassigned | Unassigned | 944_0  | Clustered           | 76 VC_944_0  | 76  | 0.9789 | 1          | 0.9789 | 0 | 0 | 0 | 1 Ref      |
| KY979236 | Unassigned | Unassigned | Unassigned | 944_0  | Clustered           | 76 VC_944_0  | 76  | 0.9789 | 1          | 0.9789 | 0 | 0 | 0 | 1 Ref      |
| KY979237 | Unassigned | Unassigned | Unassigned | 944_0  | Clustered           | 76 VC_944_0  | 76  | 0.9789 | 1          | 0.9789 | 0 | 0 | 0 | 1 Ref      |
| KY979238 | Unassigned | Unassigned | Unassigned | 944_0  | Clustered           | 76 VC_944_0  | 76  | 0.9789 | 1          | 0.9789 | 0 | 0 | 0 | 1 Ref      |
| KY979239 | Unassigned | Unassigned | Unassigned | 944_0  | Clustered           | 76 VC_944_0  | 76  | 0.9789 | 1          | 0.9789 | 0 | 0 | 0 | 1 Ref      |
| KY979240 | Unassigned | Unassigned | Unassigned | 944_0  | Clustered           | 76 VC_944_0  | 76  | 0.9789 | 1          | 0.9789 | 0 | 0 | 0 | 1 Ref      |
| KY979241 | Unassigned | Unassigned | Unassigned | 944_0  | Clustered           | 76 VC_944_0  | 76  | 0.9789 | 1          | 0.9789 | 0 | 0 | 0 | 1 Ref      |
| KY979242 | Unassigned | Unassigned | Unassigned | 944_0  | Clustered           | 76 VC_944_0  | 76  | 0.9789 | 1          | 0.9789 | 0 | 0 | 0 | 1 Ref      |
| KY979243 | Unassigned | Unassigned | Unassigned | 944_0  | Clustered           | 76 VC_944_0  | 76  | 0.9789 | 1          | 0.9789 | 0 | 0 | 0 | 1 Ref      |
| KY979244 | Unassigned | Unassigned | Unassigned | 944_0  | Clustered           | 76 VC_944_0  | 76  | 0.9789 | 1          | 0.9789 | 0 | 0 | 0 | 1 Ref      |
| KY979245 | Unassigned | Unassigned | Unassigned | 944_0  | Clustered           | 76 VC_944_0  | 76  | 0.9789 | 1          | 0.9789 | 0 | 0 | 0 | 1 Ref      |
| KY979246 | Unassigned | Unassigned | Unassigned | 944_0  | Clustered           | 76 VC_944_0  | 76  | 0.9789 | 1          | 0.9789 | 0 | 0 | 0 | 1 Ref      |



|          |            |            |            |         |                     |              |     |        |            |        |   |   |   |            |
|----------|------------|------------|------------|---------|---------------------|--------------|-----|--------|------------|--------|---|---|---|------------|
| KY979247 | Unassigned | Unassigned | Unassigned | 944_0   | Clustered           | 76 VC_944_0  | 76  | 0.9789 | 1          | 0.9789 | 0 | 0 | 0 | 1 Ref      |
| KY981272 | Unassigned | Unassigned | Unassigned | 71_0    | Clustered           | 27 VC_71_0   | 27  | 0.5964 | 1          | 0.5964 | 0 | 0 | 0 | 0.9943 Ref |
| KY984068 | Unassigned | Unassigned | Unassigned | 68_2    | Clustered           | 2 VC_68_2    | 2   | 0.0139 | 0.69357611 | 0.0097 | 0 | 0 | 0 | 1 Ref      |
| KY985004 | Unassigned | Unassigned | Unassigned | 595_0   | Clustered           | 35 VC_595_0  | 35  | 0.8809 | 1          | 0.8809 | 0 | 0 | 0 | 1 Ref      |
| KY992519 | Unassigned | Unassigned | Unassigned | 944_0   | Clustered           | 76 VC_944_0  | 76  | 0.9789 | 1          | 0.9789 | 0 | 0 | 0 | 1 Ref      |
| KY992520 | Unassigned | Unassigned | Unassigned | 944_0   | Clustered           | 76 VC_944_0  | 76  | 0.9789 | 1          | 0.9789 | 0 | 0 | 0 | 1 Ref      |
| KY994101 | Unassigned | Unassigned | Unassigned | 78_0    | Clustered           | 20 VC_78_0   | 20  | 0.9639 | 1          | 0.9639 | 0 | 0 | 0 | 1 Ref      |
| KY996523 | Unassigned | Unassigned | Unassigned | 928_0   | Clustered           | 6 VC_928_0   | 6   | 0.4065 | 1          | 0.4065 | 0 | 0 | 0 | 1 Ref      |
| L67CG    | Unassigned | Unassigned | Unassigned | 706_0   | Clustered           | 52 VC_706_0  | 52  | 0.9787 | 1          | 0.9787 | 0 | 0 | 0 | 1 Ref      |
| LAMCG    | Unassigned | Unassigned | Unassigned | 45_0    | Clustered           | 38 VC_45_0   | 38  | 0.5785 | 1          | 0.5785 | 0 | 0 | 0 | 0.9659 Ref |
| LC035386 | Unassigned | Unassigned | Unassigned | 1246_0  | Clustered           | 2 VC_1246_0  | 2   | 1      | 1          | 1      | 0 | 0 | 0 | 1 Ref      |
| LC063634 | Unassigned | Unassigned | Unassigned | 1018_0  | Clustered           | 38 VC_1018_0 | 38  | 0.9757 | 1          | 0.9757 | 0 | 0 | 0 | 1 Ref      |
| LC064302 | Unassigned | Unassigned | Unassigned | 863_0   | Clustered           | 5 VC_863_0   | 5   | 0.1633 | 0.99999995 | 0.1633 | 0 | 0 | 0 | 1 Ref      |
| LC066596 | Unassigned | Unassigned | Unassigned | 56_0    | Clustered           | 6 VC_56_0    | 6   | 0.6713 | 0.99999999 | 0.6713 | 0 | 0 | 0 | 1 Ref      |
| LC102729 | Unassigned | Unassigned | Unassigned | 180_0   | Clustered           | 3 VC_180_0   | 3   | 0.9607 | 0.99333557 | 0.9543 | 0 | 0 | 0 | 1 Ref      |
| LC102730 | Unassigned | Unassigned | Unassigned | 80_0    | Clustered           | 64 VC_80_0   | 64  | 0.418  | 1          | 0.418  | 0 | 0 | 0 | 0.7649 Ref |
| LC105987 | Unassigned | Unassigned | Unassigned | 80_0    | Clustered           | 64 VC_80_0   | 64  | 0.418  | 1          | 0.418  | 0 | 0 | 0 | 0.7649 Ref |
| LC105988 | Unassigned | Unassigned | Unassigned | 80_0    | Clustered           | 64 VC_80_0   | 64  | 0.418  | 1          | 0.418  | 0 | 0 | 0 | 0.7649 Ref |
| LC105989 | Unassigned | Unassigned | Unassigned | 80_0    | Clustered           | 64 VC_80_0   | 64  | 0.418  | 1          | 0.418  | 0 | 0 | 0 | 0.7649 Ref |
| LC105990 | Unassigned | Unassigned | Unassigned | 80_0    | Clustered           | 64 VC_80_0   | 64  | 0.418  | 1          | 0.418  | 0 | 0 | 0 | 0.7649 Ref |
| LC168164 | Unassigned | Unassigned | Unassigned | 550_1   | Clustered/Singleton | 1 VC_550_1   | 1   | 0      | 1          | 0      | 0 | 0 | 0 | 1 Ref      |
| LC210520 | Unassigned | Unassigned | Unassigned | 1246_0  | Clustered           | 2 VC_1246_0  | 2   | 1      | 1          | 1      | 0 | 0 | 0 | 1 Ref      |
| LC348379 | Unassigned | Unassigned | Unassigned | 290_182 | Clustered/Singleton | 1 VC_290_182 | 1   | 0      | 1          | 0      | 0 | 0 | 0 | 1 Ref      |
| LC348380 | Unassigned | Unassigned | Unassigned | 290_92  | Clustered           | 4 VC_290_92  | 4   | 0.0078 | 0.99995066 | 0.0078 | 0 | 0 | 0 | 1 Ref      |
| LC373201 | Unassigned | Unassigned | Unassigned | 133_2   | Clustered           | 7 VC_133_2   | 7   | 0.0679 | 1          | 0.0679 | 0 | 0 | 0 | 0.9048 Ref |
| LC375533 | Unassigned | Unassigned | Unassigned | 1018_0  | Clustered           | 38 VC_1018_0 | 38  | 0.9757 | 1          | 0.9757 | 0 | 0 | 0 | 1 Ref      |
| LC413193 | Unassigned | Unassigned | Unassigned | 848_0   | Clustered           | 124 VC_848_0 | 124 | 0.9484 | 1          | 0.9484 | 0 | 0 | 0 | 1 Ref      |
| LC413194 | Unassigned | Unassigned | Unassigned | 848_0   | Clustered           | 124 VC_848_0 | 124 | 0.9484 | 1          | 0.9484 | 0 | 0 | 0 | 1 Ref      |
| LC413195 | Unassigned | Unassigned | Unassigned | 848_0   | Clustered           | 124 VC_848_0 | 124 | 0.9484 | 1          | 0.9484 | 0 | 0 | 0 | 1 Ref      |
| LC465543 | Unassigned | Unassigned | Unassigned | 290_15  | Clustered/Singleton | 1 VC_290_15  | 1   | 0      | 1          | 0      | 0 | 0 | 0 | 1 Ref      |
| LC472881 | Unassigned | Unassigned | Unassigned | 80_1    | Clustered           | 2 VC_80_1    | 2   | 0.006  | 0.95748743 | 0.0057 | 0 | 0 | 0 | 1 Ref      |
| LC472882 | Unassigned | Unassigned | Unassigned | 81_0    | Clustered           | 41 VC_81_0   | 41  | 0.5815 | 1          | 0.5815 | 0 | 0 | 0 | 0.9805 Ref |
| LC472883 | Unassigned | Unassigned | Unassigned | 80_0    | Clustered           | 64 VC_80_0   | 64  | 0.418  | 1          | 0.418  | 0 | 0 | 0 | 0.7649 Ref |
| LC472884 | Unassigned | Unassigned | Unassigned | 80_0    | Clustered           | 64 VC_80_0   | 64  | 0.418  | 1          | 0.418  | 0 | 0 | 0 | 0.7649 Ref |
| LC473039 | Unassigned | Unassigned | Unassigned | 340_8   | Clustered           | 2 VC_340_8   | 2   | 0.0048 | 0.95654014 | 0.0046 | 0 | 0 | 0 | 1 Ref      |
| LC487410 | Unassigned | Unassigned | Unassigned | 1007_1  | Clustered           | 24 VC_1007_1 | 24  | 0.7364 | 1          | 0.7364 | 0 | 0 | 0 | 0.8877 Ref |
| LC492751 | Unassigned | Unassigned | Unassigned | 159_0   | Clustered           | 25 VC_159_0  | 25  | 0.7699 | 1          | 0.7699 | 0 | 0 | 0 | 1 Ref      |
| LC492752 | Unassigned | Unassigned | Unassigned | 159_0   | Clustered           | 25 VC_159_0  | 25  | 0.7699 | 1          | 0.7699 | 0 | 0 | 0 | 1 Ref      |
| LC494302 | Unassigned | Unassigned | Unassigned | 170_11  | Clustered           | 10 VC_170_11 | 10  | 0.1502 | 0.99999797 | 0.1502 | 0 | 0 | 0 | 0.9111 Ref |
| LC507823 | Unassigned | Unassigned | Unassigned | 654_0   | Clustered           | 115 VC_654_0 | 115 | 0.7303 | 1          | 0.7303 | 0 | 0 | 0 | 0.8764 Ref |
| LC516895 | Unassigned | Unassigned | Unassigned | 595_0   | Clustered           | 35 VC_595_0  | 35  | 0.8809 | 1          | 0.8809 | 0 | 0 | 0 | 1 Ref      |
| LC519489 | Unassigned | Unassigned | Unassigned | 340_7   | Clustered           | 18 VC_340_7  | 18  | 0.0936 | 1          | 0.0936 | 0 | 0 | 0 | 0.7778 Ref |
| LC519601 | Unassigned | Unassigned | Unassigned | 836_1   | Clustered           | 4 VC_836_1   | 4   | 0.2236 | 0.99998426 | 0.2236 | 0 | 0 | 0 | 1 Ref      |
| LC528882 | Unassigned | Unassigned | Unassigned | 3_0     | Clustered           | 17 VC_3_0    | 17  | 0.5615 | 1          | 0.5615 | 0 | 0 | 0 | 1 Ref      |
| LC541428 | Unassigned | Unassigned | Unassigned | 8_0     | Clustered           | 58 VC_8_0    | 58  | 0.8285 | 1          | 0.8285 | 0 | 0 | 0 | 0.9946 Ref |
| LC545443 | Unassigned | Unassigned | Unassigned | 120_0   | Clustered           | 3 VC_120_0   | 3   | 0.7107 | 0.99211494 | 0.7051 | 0 | 0 | 0 | 1 Ref      |
| LC545444 | Unassigned | Unassigned | Unassigned | 120_0   | Clustered           | 3 VC_120_0   | 3   | 0.7107 | 0.99211494 | 0.7051 | 0 | 0 | 0 | 1 Ref      |
| LC545445 | Unassigned | Unassigned | Unassigned | 121_0   | Clustered           | 2 VC_121_0   | 2   | 0.5501 | 0.91840661 | 0.5052 | 0 | 0 | 0 | 1 Ref      |
| LC545446 | Unassigned | Unassigned | Unassigned | 121_0   | Clustered           | 2 VC_121_0   | 2   | 0.5501 | 0.91840661 | 0.5052 | 0 | 0 | 0 | 1 Ref      |
| LC547238 | Unassigned | Unassigned | Unassigned | 110_0   | Clustered           | 33 VC_110_0  | 33  | 0.9488 | 1          | 0.9488 | 0 | 0 | 0 | 1 Ref      |
| LC552830 | Unassigned | Unassigned | Unassigned | 766_0   | Clustered           | 40 VC_766_0  | 40  | 0.7511 | 1          | 0.7511 | 0 | 0 | 0 | 1 Ref      |
| LC553734 | Unassigned | Unassigned | Unassigned | 837_0   | Clustered           | 12 VC_837_0  | 12  | 0.2327 | 1          | 0.2327 | 0 | 0 | 0 | 1 Ref      |
| LC553735 | Unassigned | Unassigned | Unassigned | 837_1   | Clustered           | 24 VC_837_1  | 24  | 0.5328 | 1          | 0.5328 | 0 | 0 | 0 | 1 Ref      |
| LC553736 | Unassigned | Unassigned | Unassigned | 611_0   | Clustered           | 50 VC_611_0  | 50  | 0.7306 | 1          | 0.7306 | 0 | 0 | 0 | 1 Ref      |
| LC567830 | Unassigned | Unassigned | Unassigned | 42_0    | Clustered           | 5 VC_42_0    | 5   | 0.0844 | 0.99999995 | 0.0844 | 0 | 0 | 0 | 1 Ref      |
| LC567838 | Unassigned | Unassigned | Unassigned | 42_0    | Clustered           | 5 VC_42_0    | 5   | 0.0844 | 0.99999995 | 0.0844 | 0 | 0 | 0 | 1 Ref      |
| LC567842 | Unassigned | Unassigned | Unassigned | 42_0    | Clustered           | 5 VC_42_0    | 5   | 0.0844 | 0.99999995 | 0.0844 | 0 | 0 | 0 | 1 Ref      |
| LC574321 | Unassigned | Unassigned | Unassigned | 155_15  | Clustered           | 16 VC_155_15 | 16  | 0.0779 | 1          | 0.0779 | 0 | 0 | 0 | 0.8083 Ref |
| LC576631 | Unassigned | Unassigned | Unassigned | 159_1   | Clustered/Singleton | 1 VC_159_1   | 1   | 0      | 1          | 0      | 0 | 0 | 0 | 1 Ref      |
| LC589952 | Unassigned | Unassigned | Unassigned | 687_0   | Clustered           | 21 VC_687_0  | 21  | 0.3608 | 1          | 0.3608 | 0 | 0 | 0 | 1 Ref      |
| LC596377 | Unassigned | Unassigned | Unassigned | 93_0    | Clustered           | 22 VC_93_0   | 22  | 0.5285 | 1          | 0.5285 | 0 | 0 | 0 | 1 Ref      |
| LC596378 | Unassigned | Unassigned | Unassigned | 93_0    | Clustered           | 22 VC_93_0   | 22  | 0.5285 | 1          | 0.5285 | 0 | 0 | 0 | 1 Ref      |
| LC596379 | Unassigned | Unassigned | Unassigned | 93_0    | Clustered           | 22 VC_93_0   | 22  | 0.5285 | 1          | 0.5285 | 0 | 0 | 0 | 1 Ref      |
| LC597490 | Unassigned | Unassigned | Unassigned | 92_0    | Clustered/Singleton | 1 VC_92_0    | 1   | 0      | 1          | 0      | 0 | 0 | 0 | 1 Ref      |
| LC616031 | Unassigned | Unassigned | Unassigned | 49_0    | Clustered           | 48 VC_49_0   | 48  | 0.7748 | 1          | 0.7748 | 0 | 0 | 0 | 1 Ref      |
| LC616032 | Unassigned | Unassigned | Unassigned | 49_0    | Clustered           | 48 VC_49_0   | 48  | 0.7748 | 1          | 0.7748 | 0 | 0 | 0 | 1 Ref      |
| LC616033 | Unassigned | Unassigned | Unassigned | 49_0    | Clustered           | 48 VC_49_0   | 48  | 0.7748 | 1          | 0.7748 | 0 | 0 | 0 | 1 Ref      |
| LC616034 | Unassigned | Unassigned | Unassigned | 49_0    | Clustered           | 48 VC_49_0   | 48  | 0.7748 | 1          | 0.7748 | 0 | 0 | 0 | 1 Ref      |
| LC616035 | Unassigned | Unassigned | Unassigned | 49_0    | Clustered           | 48 VC_49_0   | 48  | 0.7748 | 1          | 0.7748 | 0 | 0 | 0 | 1 Ref      |
| LC616036 | Unassigned | Unassigned | Unassigned | 49_0    | Clustered           | 48 VC_49_0   | 48  | 0.7748 | 1          | 0.7748 | 0 | 0 | 0 | 1 Ref      |
| LC616037 | Unassigned | Unassigned | Unassigned | 49_0    | Clustered           | 48 VC_49_0   | 48  | 0.7748 | 1          | 0.7748 | 0 | 0 | 0 | 1 Ref      |
| LC616038 | Unassigned | Unassigned | Unassigned | 49_0    | Clustered           | 48 VC_49_0   | 48  | 0.7748 | 1          | 0.7748 | 0 | 0 | 0 | 1 Ref      |
| LC616039 | Unassigned | Unassigned | Unassigned | 49_0    | Clustered           | 48 VC_49_0   | 48  | 0.7748 | 1          | 0.7748 | 0 | 0 | 0 | 1 Ref      |
| LC616040 | Unassigned | Unassigned | Unassigned | 49_0    | Clustered           | 48 VC_49_0   | 48  | 0.7748 | 1          | 0.7748 | 0 | 0 | 0 | 1 Ref      |
| LC616041 | Unassigned | Unassigned | Unassigned | 49_0    | Clustered           | 48 VC_49_0   | 48  | 0.7748 | 1          | 0.7748 | 0 | 0 | 0 | 1 Ref      |
| LC616042 | Unassigned | Unassigned | Unassigned | 49_0    | Clustered           | 48 VC_49_0   | 48  | 0.7748 | 1          | 0.7748 | 0 | 0 | 0 | 1 Ref      |
| LC616043 | Unassigned | Unassigned | Unassigned | 49_0    | Clustered           | 48 VC_49_0   | 48  | 0.7748 | 1          | 0.7748 | 0 | 0 | 0 | 1 Ref      |
| LC616044 | Unassigned | Unassigned | Unassigned | 49_0    | Clustered           | 48 VC_49_0   | 48  | 0.7748 | 1          | 0.7748 | 0 | 0 | 0 | 1 Ref      |
| LC616045 | Unassigned | Unassigned | Unassigned | 49_0    | Clustered           | 48 VC_49_0   | 48  | 0.7748 | 1          | 0.7748 | 0 | 0 | 0 | 1 Ref      |
| LC616046 | Unassigned | Unassigned | Unassigned | 49_0    | Clustered           | 48 VC_49_0   | 48  | 0.7748 | 1          | 0.7748 | 0 | 0 | 0 | 1 Ref      |
| LC616047 | Unassigned | Unassigned | Unassigned | 49_0    | Clustered           | 48 VC_49_0   | 48  | 0.7748 | 1          | 0.7748 | 0 | 0 | 0 | 1 Ref      |



[illegible]



|          |            |            |            |        |                     |              |     |        |            |        |   |   |   |            |
|----------|------------|------------|------------|--------|---------------------|--------------|-----|--------|------------|--------|---|---|---|------------|
| LC645451 | Unassigned | Unassigned | Unassigned | 44_0   | Clustered           | 49 VC_44_0   | 49  | 0.4506 | 1          | 0.4506 | 0 | 0 | 0 | 0.8605 Ref |
| LC648442 | Unassigned | Unassigned | Unassigned | 155_7  | Clustered/Singleton | 1 VC_155_7   | 1   | 0      | 1          | 0      | 0 | 0 | 0 | 1 Ref      |
| LC648443 | Unassigned | Unassigned | Unassigned | 486_0  | Clustered           | 47 VC_486_0  | 47  | 0.9022 | 1          | 0.9022 | 0 | 0 | 0 | 1 Ref      |
| LC659915 | Unassigned | Unassigned | Unassigned | 199_19 | Clustered           | 12 VC_199_19 | 12  | 0.0651 | 1          | 0.0651 | 0 | 0 | 0 | 0.8636 Ref |
| LC667451 | Unassigned | Unassigned | Unassigned | 357_1  | Clustered/Singleton | 1 VC_357_1   | 1   | 0      | 1          | 0      | 0 | 0 | 0 | 1 Ref      |
| LC667452 | Unassigned | Unassigned | Unassigned | 3_0    | Clustered           | 17 VC_3_0    | 17  | 0.5615 | 1          | 0.5615 | 0 | 0 | 0 | 1 Ref      |
| LC680884 | Unassigned | Unassigned | Unassigned | 462_0  | Clustered           | 4 VC_462_0   | 4   | 0.3031 | 0.99978853 | 0.303  | 0 | 0 | 0 | 1 Ref      |
| LC680885 | Unassigned | Unassigned | Unassigned | 463_0  | Clustered           | 7 VC_463_0   | 7   | 0.5971 | 1          | 0.5971 | 0 | 0 | 0 | 1 Ref      |
| LC709172 | Unassigned | Unassigned | Unassigned | 98_0   | Clustered           | 30 VC_98_0   | 30  | 0.7175 | 1          | 0.7175 | 0 | 0 | 0 | 1 Ref      |
| LC727695 | Unassigned | Unassigned | Unassigned | 356_0  | Clustered           | 21 VC_356_0  | 21  | 0.5409 | 1          | 0.5409 | 0 | 0 | 0 | 1 Ref      |
| LC727696 | Unassigned | Unassigned | Unassigned | 356_0  | Clustered           | 21 VC_356_0  | 21  | 0.5409 | 1          | 0.5409 | 0 | 0 | 0 | 1 Ref      |
| LC727697 | Unassigned | Unassigned | Unassigned | 171_0  | Clustered           | 4 VC_171_0   | 4   | 0.2204 | 0.99998328 | 0.2204 | 0 | 0 | 0 | 1 Ref      |
| LC727698 | Unassigned | Unassigned | Unassigned | 171_0  | Clustered           | 4 VC_171_0   | 4   | 0.2204 | 0.99998328 | 0.2204 | 0 | 0 | 0 | 1 Ref      |
| LC727699 | Unassigned | Unassigned | Unassigned | 356_0  | Clustered           | 21 VC_356_0  | 21  | 0.5409 | 1          | 0.5409 | 0 | 0 | 0 | 1 Ref      |
| LC727700 | Unassigned | Unassigned | Unassigned | 434_0  | Clustered           | 45 VC_434_0  | 45  | 0.9479 | 1          | 0.9479 | 0 | 0 | 0 | 1 Ref      |
| LC727701 | Unassigned | Unassigned | Unassigned | 356_0  | Clustered           | 21 VC_356_0  | 21  | 0.5409 | 1          | 0.5409 | 0 | 0 | 0 | 1 Ref      |
| LC727840 | Unassigned | Unassigned | Unassigned | 51_0   | Clustered           | 36 VC_51_0   | 36  | 0.6086 | 1          | 0.6086 | 0 | 0 | 0 | 1 Ref      |
| LC727841 | Unassigned | Unassigned | Unassigned | 51_0   | Clustered           | 36 VC_51_0   | 36  | 0.6086 | 1          | 0.6086 | 0 | 0 | 0 | 1 Ref      |
| LC727842 | Unassigned | Unassigned | Unassigned | 51_0   | Clustered           | 36 VC_51_0   | 36  | 0.6086 | 1          | 0.6086 | 0 | 0 | 0 | 1 Ref      |
| LC727843 | Unassigned | Unassigned | Unassigned | 51_0   | Clustered           | 36 VC_51_0   | 36  | 0.6086 | 1          | 0.6086 | 0 | 0 | 0 | 1 Ref      |
| LC727844 | Unassigned | Unassigned | Unassigned | 51_0   | Clustered           | 36 VC_51_0   | 36  | 0.6086 | 1          | 0.6086 | 0 | 0 | 0 | 1 Ref      |
| LC727845 | Unassigned | Unassigned | Unassigned | 51_0   | Clustered           | 36 VC_51_0   | 36  | 0.6086 | 1          | 0.6086 | 0 | 0 | 0 | 1 Ref      |
| LC727846 | Unassigned | Unassigned | Unassigned | 51_0   | Clustered           | 36 VC_51_0   | 36  | 0.6086 | 1          | 0.6086 | 0 | 0 | 0 | 1 Ref      |
| LC727847 | Unassigned | Unassigned | Unassigned | 51_0   | Clustered           | 36 VC_51_0   | 36  | 0.6086 | 1          | 0.6086 | 0 | 0 | 0 | 1 Ref      |
| LC727848 | Unassigned | Unassigned | Unassigned | 51_0   | Clustered           | 36 VC_51_0   | 36  | 0.6086 | 1          | 0.6086 | 0 | 0 | 0 | 1 Ref      |
| LC727849 | Unassigned | Unassigned | Unassigned | 51_0   | Clustered           | 36 VC_51_0   | 36  | 0.6086 | 1          | 0.6086 | 0 | 0 | 0 | 1 Ref      |
| LC727850 | Unassigned | Unassigned | Unassigned | 51_0   | Clustered           | 36 VC_51_0   | 36  | 0.6086 | 1          | 0.6086 | 0 | 0 | 0 | 1 Ref      |
| LC727851 | Unassigned | Unassigned | Unassigned | 51_0   | Clustered           | 36 VC_51_0   | 36  | 0.6086 | 1          | 0.6086 | 0 | 0 | 0 | 1 Ref      |
| LC727852 | Unassigned | Unassigned | Unassigned | 51_0   | Clustered           | 36 VC_51_0   | 36  | 0.6086 | 1          | 0.6086 | 0 | 0 | 0 | 1 Ref      |
| LC727853 | Unassigned | Unassigned | Unassigned | 51_0   | Clustered           | 36 VC_51_0   | 36  | 0.6086 | 1          | 0.6086 | 0 | 0 | 0 | 1 Ref      |
| LC727854 | Unassigned | Unassigned | Unassigned | 51_0   | Clustered           | 36 VC_51_0   | 36  | 0.6086 | 1          | 0.6086 | 0 | 0 | 0 | 1 Ref      |
| LC727855 | Unassigned | Unassigned | Unassigned | 51_0   | Clustered           | 36 VC_51_0   | 36  | 0.6086 | 1          | 0.6086 | 0 | 0 | 0 | 1 Ref      |
| LC727856 | Unassigned | Unassigned | Unassigned | 51_0   | Clustered           | 36 VC_51_0   | 36  | 0.6086 | 1          | 0.6086 | 0 | 0 | 0 | 1 Ref      |
| LC727857 | Unassigned | Unassigned | Unassigned | 51_0   | Clustered           | 36 VC_51_0   | 36  | 0.6086 | 1          | 0.6086 | 0 | 0 | 0 | 1 Ref      |
| LC727858 | Unassigned | Unassigned | Unassigned | 51_0   | Clustered           | 36 VC_51_0   | 36  | 0.6086 | 1          | 0.6086 | 0 | 0 | 0 | 1 Ref      |
| LC727859 | Unassigned | Unassigned | Unassigned | 51_0   | Clustered           | 36 VC_51_0   | 36  | 0.6086 | 1          | 0.6086 | 0 | 0 | 0 | 1 Ref      |
| LC727860 | Unassigned | Unassigned | Unassigned | 51_0   | Clustered           | 36 VC_51_0   | 36  | 0.6086 | 1          | 0.6086 | 0 | 0 | 0 | 1 Ref      |
| LC727861 | Unassigned | Unassigned | Unassigned | 51_0   | Clustered           | 36 VC_51_0   | 36  | 0.6086 | 1          | 0.6086 | 0 | 0 | 0 | 1 Ref      |
| LC727862 | Unassigned | Unassigned | Unassigned | 51_0   | Clustered           | 36 VC_51_0   | 36  | 0.6086 | 1          | 0.6086 | 0 | 0 | 0 | 1 Ref      |
| LC727863 | Unassigned | Unassigned | Unassigned | 51_0   | Clustered           | 36 VC_51_0   | 36  | 0.6086 | 1          | 0.6086 | 0 | 0 | 0 | 1 Ref      |
| LC727864 | Unassigned | Unassigned | Unassigned | 51_0   | Clustered           | 36 VC_51_0   | 36  | 0.6086 | 1          | 0.6086 | 0 | 0 | 0 | 1 Ref      |
| LC727865 | Unassigned | Unassigned | Unassigned | 51_0   | Clustered           | 36 VC_51_0   | 36  | 0.6086 | 1          | 0.6086 | 0 | 0 | 0 | 1 Ref      |
| LC727866 | Unassigned | Unassigned | Unassigned | 51_0   | Clustered           | 36 VC_51_0   | 36  | 0.6086 | 1          | 0.6086 | 0 | 0 | 0 | 1 Ref      |
| LC727867 | Unassigned | Unassigned | Unassigned | 51_0   | Clustered           | 36 VC_51_0   | 36  | 0.6086 | 1          | 0.6086 | 0 | 0 | 0 | 1 Ref      |
| LC727868 | Unassigned | Unassigned | Unassigned | 51_0   | Clustered           | 36 VC_51_0   | 36  | 0.6086 | 1          | 0.6086 | 0 | 0 | 0 | 1 Ref      |
| LC727869 | Unassigned | Unassigned | Unassigned | 51_0   | Clustered           | 36 VC_51_0   | 36  | 0.6086 | 1          | 0.6086 | 0 | 0 | 0 | 1 Ref      |
| LC727870 | Unassigned | Unassigned | Unassigned | 51_0   | Clustered           | 36 VC_51_0   | 36  | 0.6086 | 1          | 0.6086 | 0 | 0 | 0 | 1 Ref      |
| LC727871 | Unassigned | Unassigned | Unassigned | 51_0   | Clustered           | 36 VC_51_0   | 36  | 0.6086 | 1          | 0.6086 | 0 | 0 | 0 | 1 Ref      |
| LC727872 | Unassigned | Unassigned | Unassigned | 51_0   | Clustered           | 36 VC_51_0   | 36  | 0.6086 | 1          | 0.6086 | 0 | 0 | 0 | 1 Ref      |
| LC727873 | Unassigned | Unassigned | Unassigned | 51_0   | Clustered           | 36 VC_51_0   | 36  | 0.6086 | 1          | 0.6086 | 0 | 0 | 0 | 1 Ref      |
| LC727874 | Unassigned | Unassigned | Unassigned | 51_0   | Clustered           | 36 VC_51_0   | 36  | 0.6086 | 1          | 0.6086 | 0 | 0 | 0 | 1 Ref      |
| LC727875 | Unassigned | Unassigned | Unassigned | 51_0   | Clustered           | 36 VC_51_0   | 36  | 0.6086 | 1          | 0.6086 | 0 | 0 | 0 | 1 Ref      |
| LC727891 | Unassigned | Unassigned | Unassigned | 43_0   | Clustered           | 16 VC_43_0   | 16  | 0.2017 | 1          | 0.2017 | 0 | 0 | 0 | 0.9667 Ref |
| LC727892 | Unassigned | Unassigned | Unassigned | 43_0   | Clustered           | 16 VC_43_0   | 16  | 0.2017 | 1          | 0.2017 | 0 | 0 | 0 | 0.9667 Ref |
| LC727893 | Unassigned | Unassigned | Unassigned | 43_0   | Clustered           | 16 VC_43_0   | 16  | 0.2017 | 1          | 0.2017 | 0 | 0 | 0 | 0.9667 Ref |
| LC727894 | Unassigned | Unassigned | Unassigned | 43_0   | Clustered           | 16 VC_43_0   | 16  | 0.2017 | 1          | 0.2017 | 0 | 0 | 0 | 0.9667 Ref |
| LC727895 | Unassigned | Unassigned | Unassigned | 43_0   | Clustered           | 16 VC_43_0   | 16  | 0.2017 | 1          | 0.2017 | 0 | 0 | 0 | 0.9667 Ref |
| LC727896 | Unassigned | Unassigned | Unassigned | 43_0   | Clustered           | 16 VC_43_0   | 16  | 0.2017 | 1          | 0.2017 | 0 | 0 | 0 | 0.9667 Ref |
| LC727897 | Unassigned | Unassigned | Unassigned | 43_0   | Clustered           | 16 VC_43_0   | 16  | 0.2017 | 1          | 0.2017 | 0 | 0 | 0 | 0.9667 Ref |
| LC727898 | Unassigned | Unassigned | Unassigned | 43_0   | Clustered           | 16 VC_43_0   | 16  | 0.2017 | 1          | 0.2017 | 0 | 0 | 0 | 0.9667 Ref |
| LC727899 | Unassigned | Unassigned | Unassigned | 43_0   | Clustered           | 16 VC_43_0   | 16  | 0.2017 | 1          | 0.2017 | 0 | 0 | 0 | 0.9667 Ref |
| LC727900 | Unassigned | Unassigned | Unassigned | 43_0   | Clustered           | 16 VC_43_0   | 16  | 0.2017 | 1          | 0.2017 | 0 | 0 | 0 | 0.9667 Ref |
| LC727901 | Unassigned | Unassigned | Unassigned | 43_0   | Clustered           | 16 VC_43_0   | 16  | 0.2017 | 1          | 0.2017 | 0 | 0 | 0 | 0.9667 Ref |
| LC727902 | Unassigned | Unassigned | Unassigned | 43_0   | Clustered           | 16 VC_43_0   | 16  | 0.2017 | 1          | 0.2017 | 0 | 0 | 0 | 0.9667 Ref |
| LC727903 | Unassigned | Unassigned | Unassigned | 44_0   | Clustered           | 49 VC_44_0   | 49  | 0.4506 | 1          | 0.4506 | 0 | 0 | 0 | 0.8605 Ref |
| LC730317 | Unassigned | Unassigned | Unassigned | 531_0  | Clustered           | 32 VC_531_0  | 32  | 0.6859 | 1          | 0.6859 | 0 | 0 | 0 | 1 Ref      |
| LC730318 | Unassigned | Unassigned | Unassigned | 222_1  | Clustered           | 19 VC_222_1  | 19  | 0.4166 | 1          | 0.4166 | 0 | 0 | 0 | 1 Ref      |
| LC730319 | Unassigned | Unassigned | Unassigned | 131_0  | Clustered           | 43 VC_131_0  | 43  | 0.8853 | 1          | 0.8853 | 0 | 0 | 0 | 1 Ref      |
| LC730320 | Unassigned | Unassigned | Unassigned | 223_6  | Clustered           | 42 VC_223_6  | 42  | 0.4717 | 1          | 0.4717 | 0 | 0 | 0 | 0.8351 Ref |
| LC730321 | Unassigned | Unassigned | Unassigned | 45_0   | Clustered           | 38 VC_45_0   | 38  | 0.5785 | 1          | 0.5785 | 0 | 0 | 0 | 0.9659 Ref |
| LC730322 | Unassigned | Unassigned | Unassigned | 30_1   | Clustered           | 53 VC_30_1   | 53  | 0.7151 | 1          | 0.7151 | 0 | 0 | 0 | 0.9325 Ref |
| LC730323 | Unassigned | Unassigned | Unassigned | 466_0  | Clustered           | 66 VC_466_0  | 66  | 0.9246 | 1          | 0.9246 | 0 | 0 | 0 | 1 Ref      |
| LC730324 | Unassigned | Unassigned | Unassigned | 398_0  | Clustered           | 51 VC_398_0  | 51  | 0.8741 | 1          | 0.8741 | 0 | 0 | 0 | 1 Ref      |
| LC730325 | Unassigned | Unassigned | Unassigned | 405_0  | Clustered           | 126 VC_405_0 | 126 | 0.9614 | 1          | 0.9614 | 0 | 0 | 0 | 1 Ref      |
| LC739530 | Unassigned | Unassigned | Unassigned | 340_20 | Clustered           | 4 VC_340_20  | 4   | 0.0173 | 0.99998777 | 0.0173 | 0 | 0 | 0 | 1 Ref      |
| LC739531 | Unassigned | Unassigned | Unassigned | 340_20 | Clustered           | 4 VC_340_20  | 4   | 0.0173 | 0.99998777 | 0.0173 | 0 | 0 | 0 | 1 Ref      |
| LC739532 | Unassigned | Unassigned | Unassigned | 340_20 | Clustered           | 4 VC_340_20  | 4   | 0.0173 | 0.99998777 | 0.0173 | 0 | 0 | 0 | 1 Ref      |
| LC739533 | Unassigned | Unassigned | Unassigned | 871_0  | Clustered           | 5 VC_871_0   | 5   | 0.0619 | 0.99921937 | 0.0619 | 0 | 0 | 0 | 1 Ref      |
| LC739534 | Unassigned | Unassigned | Unassigned | 871_0  | Clustered           | 5 VC_871_0   | 5   | 0.0619 | 0.99921937 | 0.0619 | 0 | 0 | 0 | 1 Ref      |
| LC739535 | Unassigned | Unassigned | Unassigned | 871_0  | Clustered           | 5 VC_871_0   | 5   | 0.0619 | 0.99921937 | 0.0619 | 0 | 0 | 0 | 1 Ref      |
| LC739536 | Unassigned | Unassigned | Unassigned | 872_0  | Clustered           | 28 VC_872_0  | 28  | 0.7887 | 1          | 0.7887 | 0 | 0 | 0 | 1 Ref      |



|          |            |            |            |        |                     |              |     |        |            |        |   |   |   |            |
|----------|------------|------------|------------|--------|---------------------|--------------|-----|--------|------------|--------|---|---|---|------------|
| LC739537 | Unassigned | Unassigned | Unassigned | 871_0  | Clustered           | 5 VC_871_0   | 5   | 0.0619 | 0.99921937 | 0.0619 | 0 | 0 | 0 | 1 Ref      |
| LC739538 | Unassigned | Unassigned | Unassigned | 794_16 | Clustered           | 10 VC_794_16 | 10  | 0.0563 | 0.9411319  | 0.053  | 0 | 0 | 0 | 0.8667 Ref |
| LC739539 | Unassigned | Unassigned | Unassigned | 871_0  | Clustered           | 5 VC_871_0   | 5   | 0.0619 | 0.99921937 | 0.0619 | 0 | 0 | 0 | 1 Ref      |
| LC739540 | Unassigned | Unassigned | Unassigned | 794_16 | Clustered           | 10 VC_794_16 | 10  | 0.0563 | 0.9411319  | 0.053  | 0 | 0 | 0 | 0.8667 Ref |
| LC739541 | Unassigned | Unassigned | Unassigned | 794_11 | Clustered           | 6 VC_794_11  | 6   | 0.0305 | 0.83830784 | 0.0256 | 0 | 0 | 0 | 0.8 Ref    |
| LC739542 | Unassigned | Unassigned | Unassigned | 794_11 | Clustered           | 6 VC_794_11  | 6   | 0.0305 | 0.83830784 | 0.0256 | 0 | 0 | 0 | 0.8 Ref    |
| LK392619 | Unassigned | Unassigned | Unassigned | 1089_0 | Clustered           | 3 VC_1089_0  | 3   | 1      | 1          | 1      | 0 | 0 | 0 | 1 Ref      |
| LK985321 | Unassigned | Unassigned | Unassigned | 666_0  | Clustered           | 11 VC_666_0  | 11  | 0.5822 | 1          | 0.5822 | 0 | 0 | 0 | 1 Ref      |
| LK985322 | Unassigned | Unassigned | Unassigned | 140_0  | Clustered           | 2 VC_140_0   | 2   | 0.067  | 0.95523577 | 0.064  | 0 | 0 | 0 | 1 Ref      |
| LN610572 | Unassigned | Unassigned | Unassigned | 77_0   | Clustered           | 37 VC_77_0   | 37  | 0.9392 | 1          | 0.9392 | 0 | 0 | 0 | 1 Ref      |
| LN610573 | Unassigned | Unassigned | Unassigned | 78_0   | Clustered           | 20 VC_78_0   | 20  | 0.9639 | 1          | 0.9639 | 0 | 0 | 0 | 1 Ref      |
| LN610574 | Unassigned | Unassigned | Unassigned | 434_0  | Clustered           | 45 VC_434_0  | 45  | 0.9479 | 1          | 0.9479 | 0 | 0 | 0 | 1 Ref      |
| LN610575 | Unassigned | Unassigned | Unassigned | 77_0   | Clustered           | 37 VC_77_0   | 37  | 0.9392 | 1          | 0.9392 | 0 | 0 | 0 | 1 Ref      |
| LN610576 | Unassigned | Unassigned | Unassigned | 78_0   | Clustered           | 20 VC_78_0   | 20  | 0.9639 | 1          | 0.9639 | 0 | 0 | 0 | 1 Ref      |
| LN610577 | Unassigned | Unassigned | Unassigned | 478_0  | Clustered           | 8 VC_478_0   | 8   | 0.2619 | 1          | 0.2619 | 0 | 0 | 0 | 1 Ref      |
| LN610578 | Unassigned | Unassigned | Unassigned | 486_0  | Clustered           | 47 VC_486_0  | 47  | 0.9022 | 1          | 0.9022 | 0 | 0 | 0 | 1 Ref      |
| LN610579 | Unassigned | Unassigned | Unassigned | 80_0   | Clustered           | 64 VC_80_0   | 64  | 0.418  | 1          | 0.418  | 0 | 0 | 0 | 0.7649 Ref |
| LN610580 | Unassigned | Unassigned | Unassigned | 434_0  | Clustered           | 45 VC_434_0  | 45  | 0.9479 | 1          | 0.9479 | 0 | 0 | 0 | 1 Ref      |
| LN610581 | Unassigned | Unassigned | Unassigned | 78_0   | Clustered           | 20 VC_78_0   | 20  | 0.9639 | 1          | 0.9639 | 0 | 0 | 0 | 1 Ref      |
| LN610582 | Unassigned | Unassigned | Unassigned | 78_0   | Clustered           | 20 VC_78_0   | 20  | 0.9639 | 1          | 0.9639 | 0 | 0 | 0 | 1 Ref      |
| LN610583 | Unassigned | Unassigned | Unassigned | 78_0   | Clustered           | 20 VC_78_0   | 20  | 0.9639 | 1          | 0.9639 | 0 | 0 | 0 | 1 Ref      |
| LN610584 | Unassigned | Unassigned | Unassigned | 478_0  | Clustered           | 8 VC_478_0   | 8   | 0.2619 | 1          | 0.2619 | 0 | 0 | 0 | 1 Ref      |
| LN610585 | Unassigned | Unassigned | Unassigned | 478_0  | Clustered           | 8 VC_478_0   | 8   | 0.2619 | 1          | 0.2619 | 0 | 0 | 0 | 1 Ref      |
| LN610586 | Unassigned | Unassigned | Unassigned | 77_0   | Clustered           | 37 VC_77_0   | 37  | 0.9392 | 1          | 0.9392 | 0 | 0 | 0 | 1 Ref      |
| LN610587 | Unassigned | Unassigned | Unassigned | 77_0   | Clustered           | 37 VC_77_0   | 37  | 0.9392 | 1          | 0.9392 | 0 | 0 | 0 | 1 Ref      |
| LN610588 | Unassigned | Unassigned | Unassigned | 80_0   | Clustered           | 64 VC_80_0   | 64  | 0.418  | 1          | 0.418  | 0 | 0 | 0 | 0.7649 Ref |
| LN610589 | Unassigned | Unassigned | Unassigned | 81_0   | Clustered           | 41 VC_81_0   | 41  | 0.5815 | 1          | 0.5815 | 0 | 0 | 0 | 0.9805 Ref |
| LN610590 | Unassigned | Unassigned | Unassigned | 185_0  | Clustered           | 53 VC_185_0  | 53  | 0.9153 | 1          | 0.9153 | 0 | 0 | 0 | 1 Ref      |
| LN681534 | Unassigned | Unassigned | Unassigned | 788_0  | Clustered           | 2 VC_788_0   | 2   | 0.2235 | 0.95055313 | 0.2125 | 0 | 0 | 0 | 1 Ref      |
| LN681535 | Unassigned | Unassigned | Unassigned | 749_0  | Clustered           | 5 VC_749_0   | 5   | 0.4704 | 0.99999995 | 0.4704 | 0 | 0 | 0 | 1 Ref      |
| LN681536 | Unassigned | Unassigned | Unassigned | 749_0  | Clustered           | 5 VC_749_0   | 5   | 0.4704 | 0.99999995 | 0.4704 | 0 | 0 | 0 | 1 Ref      |
| LN681537 | Unassigned | Unassigned | Unassigned | 487_2  | Clustered           | 2 VC_487_2   | 2   | 0.1024 | 0.94551181 | 0.0968 | 0 | 0 | 0 | 1 Ref      |
| LN681538 | Unassigned | Unassigned | Unassigned | 666_0  | Clustered           | 11 VC_666_0  | 11  | 0.5822 | 1          | 0.5822 | 0 | 0 | 0 | 1 Ref      |
| LN681540 | Unassigned | Unassigned | Unassigned | 666_0  | Clustered           | 11 VC_666_0  | 11  | 0.5822 | 1          | 0.5822 | 0 | 0 | 0 | 1 Ref      |
| LN681541 | Unassigned | Unassigned | Unassigned | 140_1  | Clustered           | 4 VC_140_1   | 4   | 0.1766 | 0.99998565 | 0.1766 | 0 | 0 | 0 | 1 Ref      |
| LN681542 | Unassigned | Unassigned | Unassigned | 140_1  | Clustered           | 4 VC_140_1   | 4   | 0.1766 | 0.99998565 | 0.1766 | 0 | 0 | 0 | 1 Ref      |
| LN828717 | Unassigned | Unassigned | Unassigned | 447_5  | Clustered           | 2 VC_447_5   | 2   | 0.0172 | 0.93642158 | 0.0161 | 0 | 0 | 0 | 1 Ref      |
| LN866626 | Unassigned | Unassigned | Unassigned | 848_0  | Clustered           | 124 VC_848_0 | 124 | 0.9484 | 1          | 0.9484 | 0 | 0 | 0 | 1 Ref      |
| LN878149 | Unassigned | Unassigned | Unassigned | 907_0  | Clustered           | 32 VC_907_0  | 32  | 0.9964 | 1          | 0.9964 | 0 | 0 | 0 | 1 Ref      |
| LN881725 | Unassigned | Unassigned | Unassigned | 819_0  | Clustered           | 19 VC_819_0  | 19  | 0.6835 | 1          | 0.6835 | 0 | 0 | 0 | 1 Ref      |
| LN881726 | Unassigned | Unassigned | Unassigned | 290_33 | Clustered           | 4 VC_290_33  | 4   | 0.0075 | 0.99975449 | 0.0075 | 0 | 0 | 0 | 1 Ref      |
| LN881727 | Unassigned | Unassigned | Unassigned | 794_9  | Clustered           | 7 VC_794_9   | 7   | 0.0369 | 0.87330366 | 0.0322 | 0 | 0 | 0 | 1 Ref      |
| LN881728 | Unassigned | Unassigned | Unassigned | 290_73 | Clustered           | 3 VC_290_73  | 3   | 0.0051 | 0.99726944 | 0.0051 | 0 | 0 | 0 | 1 Ref      |
| LN881729 | Unassigned | Unassigned | Unassigned | 290_33 | Clustered           | 4 VC_290_33  | 4   | 0.0075 | 0.99975449 | 0.0075 | 0 | 0 | 0 | 1 Ref      |
| LN881730 | Unassigned | Unassigned | Unassigned | 859_0  | Clustered           | 67 VC_859_0  | 67  | 0.9622 | 1          | 0.9622 | 0 | 0 | 0 | 1 Ref      |
| LN881731 | Unassigned | Unassigned | Unassigned | 859_0  | Clustered           | 67 VC_859_0  | 67  | 0.9622 | 1          | 0.9622 | 0 | 0 | 0 | 1 Ref      |
| LN881732 | Unassigned | Unassigned | Unassigned | 290_37 | Clustered/Singleton | 1 VC_290_37  | 1   | 0      | 1          | 0      | 0 | 0 | 0 | 1 Ref      |
| LN881733 | Unassigned | Unassigned | Unassigned | 290_73 | Clustered           | 3 VC_290_73  | 3   | 0.0051 | 0.99726944 | 0.0051 | 0 | 0 | 0 | 1 Ref      |
| LN881734 | Unassigned | Unassigned | Unassigned | 290_33 | Clustered           | 4 VC_290_33  | 4   | 0.0075 | 0.99975449 | 0.0075 | 0 | 0 | 0 | 1 Ref      |
| LN881735 | Unassigned | Unassigned | Unassigned | 794_9  | Clustered           | 7 VC_794_9   | 7   | 0.0369 | 0.87330366 | 0.0322 | 0 | 0 | 0 | 1 Ref      |
| LN881736 | Unassigned | Unassigned | Unassigned | 290_73 | Clustered           | 3 VC_290_73  | 3   | 0.0051 | 0.99726944 | 0.0051 | 0 | 0 | 0 | 1 Ref      |
| LN881737 | Unassigned | Unassigned | Unassigned | 290_33 | Clustered           | 4 VC_290_33  | 4   | 0.0075 | 0.99975449 | 0.0075 | 0 | 0 | 0 | 1 Ref      |
| LN881738 | Unassigned | Unassigned | Unassigned | 749_0  | Clustered           | 5 VC_749_0   | 5   | 0.4704 | 0.99999995 | 0.4704 | 0 | 0 | 0 | 1 Ref      |
| LN887844 | Unassigned | Unassigned | Unassigned | 79_5   | Clustered           | 6 VC_79_5    | 6   | 0.1083 | 0.99974986 | 0.1083 | 0 | 0 | 0 | 1 Ref      |
| LN887948 | Unassigned | Unassigned | Unassigned | 198_20 | Clustered           | 4 VC_198_20  | 4   | 0.0227 | 0.99997722 | 0.0227 | 0 | 0 | 0 | 1 Ref      |
| LN889756 | Unassigned | Unassigned | Unassigned | 131_0  | Clustered           | 43 VC_131_0  | 43  | 0.8853 | 1          | 0.8853 | 0 | 0 | 0 | 1 Ref      |
| LN889995 | Unassigned | Unassigned | Unassigned | 131_0  | Clustered           | 43 VC_131_0  | 43  | 0.8853 | 1          | 0.8853 | 0 | 0 | 0 | 1 Ref      |
| LN898172 | Unassigned | Unassigned | Unassigned | 192_0  | Clustered           | 22 VC_192_0  | 22  | 0.6582 | 1          | 0.6582 | 0 | 0 | 0 | 1 Ref      |
| LN907801 | Unassigned | Unassigned | Unassigned | 185_0  | Clustered           | 53 VC_185_0  | 53  | 0.9153 | 1          | 0.9153 | 0 | 0 | 0 | 1 Ref      |
| LN913017 | Unassigned | Unassigned | Unassigned | 131_0  | Clustered           | 43 VC_131_0  | 43  | 0.8853 | 1          | 0.8853 | 0 | 0 | 0 | 1 Ref      |
| LR025195 | Unassigned | Unassigned | Unassigned | 819_0  | Clustered           | 19 VC_819_0  | 19  | 0.6835 | 1          | 0.6835 | 0 | 0 | 0 | 1 Ref      |
| LR025196 | Unassigned | Unassigned | Unassigned | 819_0  | Clustered           | 19 VC_819_0  | 19  | 0.6835 | 1          | 0.6835 | 0 | 0 | 0 | 1 Ref      |
| LR025197 | Unassigned | Unassigned | Unassigned | 819_0  | Clustered           | 19 VC_819_0  | 19  | 0.6835 | 1          | 0.6835 | 0 | 0 | 0 | 1 Ref      |
| LR025198 | Unassigned | Unassigned | Unassigned | 819_0  | Clustered           | 19 VC_819_0  | 19  | 0.6835 | 1          | 0.6835 | 0 | 0 | 0 | 1 Ref      |
| LR026998 | Unassigned | Unassigned | Unassigned | 611_0  | Clustered           | 50 VC_611_0  | 50  | 0.7306 | 1          | 0.7306 | 0 | 0 | 0 | 1 Ref      |
| LR027383 | Unassigned | Unassigned | Unassigned | 293_1  | Clustered           | 21 VC_293_1  | 21  | 0.1694 | 1          | 0.1694 | 0 | 0 | 0 | 0.9048 Ref |
| LR027384 | Unassigned | Unassigned | Unassigned | 198_12 | Clustered/Singleton | 1 VC_198_12  | 1   | 0      | 1          | 0      | 0 | 0 | 0 | 1 Ref      |
| LR027385 | Unassigned | Unassigned | Unassigned | 976_0  | Clustered           | 36 VC_976_0  | 36  | 0.7833 | 1          | 0.7833 | 0 | 0 | 0 | 1 Ref      |
| LR027386 | Unassigned | Unassigned | Unassigned | 293_1  | Clustered           | 21 VC_293_1  | 21  | 0.1694 | 1          | 0.1694 | 0 | 0 | 0 | 0.9048 Ref |
| LR027387 | Unassigned | Unassigned | Unassigned | 293_1  | Clustered           | 21 VC_293_1  | 21  | 0.1694 | 1          | 0.1694 | 0 | 0 | 0 | 0.9048 Ref |
| LR027388 | Unassigned | Unassigned | Unassigned | 976_0  | Clustered           | 36 VC_976_0  | 36  | 0.7833 | 1          | 0.7833 | 0 | 0 | 0 | 1 Ref      |
| LR027389 | Unassigned | Unassigned | Unassigned | 199_14 | Clustered/Singleton | 1 VC_199_14  | 1   | 0      | 1          | 0      | 0 | 0 | 0 | 1 Ref      |
| LR027390 | Unassigned | Unassigned | Unassigned | 293_1  | Clustered           | 21 VC_293_1  | 21  | 0.1694 | 1          | 0.1694 | 0 | 0 | 0 | 0.9048 Ref |
| LR027391 | Unassigned | Unassigned | Unassigned | 293_1  | Clustered           | 21 VC_293_1  | 21  | 0.1694 | 1          | 0.1694 | 0 | 0 | 0 | 0.9048 Ref |
| LR031359 | Unassigned | Unassigned | Unassigned | 93_0   | Clustered           | 22 VC_93_0   | 22  | 0.5285 | 1          | 0.5285 | 0 | 0 | 0 | 1 Ref      |
| LR215718 | Unassigned | Unassigned | Unassigned | 155_15 | Clustered           | 16 VC_155_15 | 16  | 0.0779 | 1          | 0.0779 | 0 | 0 | 0 | 0.8083 Ref |
| LR215719 | Unassigned | Unassigned | Unassigned | 155_13 | Clustered           | 3 VC_155_13  | 3   | 0.0087 | 0.95130224 | 0.0083 | 0 | 0 | 0 | 1 Ref      |
| LR215720 | Unassigned | Unassigned | Unassigned | 155_2  | Clustered/Singleton | 1 VC_155_2   | 1   | 0      | 1          | 0      | 0 | 0 | 0 | 1 Ref      |
| LR215721 | Unassigned | Unassigned | Unassigned | 155_29 | Clustered           | 3 VC_155_29  | 3   | 0.0119 | 0.99412742 | 0.0118 | 0 | 0 | 0 | 1 Ref      |
| LR215722 | Unassigned | Unassigned | Unassigned | 290_97 | Clustered/Singleton | 1 VC_290_97  | 1   | 0      | 1          | 0      | 0 | 0 | 0 | 1 Ref      |
| LR215723 | Unassigned | Unassigned | Unassigned | 290_71 | Clustered/Singleton | 1 VC_290_71  | 1   | 0      | 1          | 0      | 0 | 0 | 0 | 1 Ref      |



|          |            |            |            |         |                     |              |    |        |            |        |   |   |   |            |
|----------|------------|------------|------------|---------|---------------------|--------------|----|--------|------------|--------|---|---|---|------------|
| LR215724 | Unassigned | Unassigned | Unassigned | 290_113 | Clustered/Singleton | 1 VC_290_113 | 1  | 0      | 1          | 0      | 0 | 0 | 0 | 1 Ref      |
| LR535901 | Unassigned | Unassigned | Unassigned | 1251_0  | Clustered           | 11 VC_1251_0 | 11 | 1      | 0          | 0      | 0 | 0 | 0 | 1 Ref      |
| LR535902 | Unassigned | Unassigned | Unassigned | 994_5   | Clustered           | 19 VC_994_5  | 19 | 0.2622 | 1          | 0.2622 | 0 | 0 | 0 | 1 Ref      |
| LR535903 | Unassigned | Unassigned | Unassigned | 1251_0  | Clustered           | 11 VC_1251_0 | 11 | 1      | 0          | 0      | 0 | 0 | 0 | 1 Ref      |
| LR535904 | Unassigned | Unassigned | Unassigned | 1251_0  | Clustered           | 11 VC_1251_0 | 11 | 1      | 0          | 0      | 0 | 0 | 0 | 1 Ref      |
| LR535905 | Unassigned | Unassigned | Unassigned | 1251_0  | Clustered           | 11 VC_1251_0 | 11 | 1      | 0          | 0      | 0 | 0 | 0 | 1 Ref      |
| LR535906 | Unassigned | Unassigned | Unassigned | 1251_0  | Clustered           | 11 VC_1251_0 | 11 | 1      | 0          | 0      | 0 | 0 | 0 | 1 Ref      |
| LR535907 | Unassigned | Unassigned | Unassigned | 1251_0  | Clustered           | 11 VC_1251_0 | 11 | 1      | 0          | 0      | 0 | 0 | 0 | 1 Ref      |
| LR535908 | Unassigned | Unassigned | Unassigned | 1251_0  | Clustered           | 11 VC_1251_0 | 11 | 1      | 0          | 0      | 0 | 0 | 0 | 1 Ref      |
| LR535909 | Unassigned | Unassigned | Unassigned | 994_5   | Clustered           | 19 VC_994_5  | 19 | 0.2622 | 1          | 0.2622 | 0 | 0 | 0 | 1 Ref      |
| LR535910 | Unassigned | Unassigned | Unassigned | 994_5   | Clustered           | 19 VC_994_5  | 19 | 0.2622 | 1          | 0.2622 | 0 | 0 | 0 | 1 Ref      |
| LR535911 | Unassigned | Unassigned | Unassigned | 1251_0  | Clustered           | 11 VC_1251_0 | 11 | 1      | 0          | 0      | 0 | 0 | 0 | 1 Ref      |
| LR535912 | Unassigned | Unassigned | Unassigned | 1251_0  | Clustered           | 11 VC_1251_0 | 11 | 1      | 0          | 0      | 0 | 0 | 0 | 1 Ref      |
| LR535913 | Unassigned | Unassigned | Unassigned | 1251_0  | Clustered           | 11 VC_1251_0 | 11 | 1      | 0          | 0      | 0 | 0 | 0 | 1 Ref      |
| LR535914 | Unassigned | Unassigned | Unassigned | 994_5   | Clustered           | 19 VC_994_5  | 19 | 0.2622 | 1          | 0.2622 | 0 | 0 | 0 | 1 Ref      |
| LR535915 | Unassigned | Unassigned | Unassigned | 994_5   | Clustered           | 19 VC_994_5  | 19 | 0.2622 | 1          | 0.2622 | 0 | 0 | 0 | 1 Ref      |
| LR535916 | Unassigned | Unassigned | Unassigned | 994_5   | Clustered           | 19 VC_994_5  | 19 | 0.2622 | 1          | 0.2622 | 0 | 0 | 0 | 1 Ref      |
| LR535917 | Unassigned | Unassigned | Unassigned | 1251_0  | Clustered           | 11 VC_1251_0 | 11 | 1      | 0          | 0      | 0 | 0 | 0 | 1 Ref      |
| LR535918 | Unassigned | Unassigned | Unassigned | 994_5   | Clustered           | 19 VC_994_5  | 19 | 0.2622 | 1          | 0.2622 | 0 | 0 | 0 | 1 Ref      |
| LR535919 | Unassigned | Unassigned | Unassigned | 994_5   | Clustered           | 19 VC_994_5  | 19 | 0.2622 | 1          | 0.2622 | 0 | 0 | 0 | 1 Ref      |
| LR535920 | Unassigned | Unassigned | Unassigned | 994_5   | Clustered           | 19 VC_994_5  | 19 | 0.2622 | 1          | 0.2622 | 0 | 0 | 0 | 1 Ref      |
| LR535921 | Unassigned | Unassigned | Unassigned | 994_5   | Clustered           | 19 VC_994_5  | 19 | 0.2622 | 1          | 0.2622 | 0 | 0 | 0 | 1 Ref      |
| LR588166 | Unassigned | Unassigned | Unassigned | 171_0   | Clustered           | 4 VC_171_0   | 4  | 0.2204 | 0.99998328 | 0.2204 | 0 | 0 | 0 | 1 Ref      |
| LR595850 | Unassigned | Unassigned | Unassigned | 45_0    | Clustered           | 38 VC_45_0   | 38 | 0.5785 | 1          | 0.5785 | 0 | 0 | 0 | 0.9659 Ref |
| LR595859 | Unassigned | Unassigned | Unassigned | 45_0    | Clustered           | 38 VC_45_0   | 38 | 0.5785 | 1          | 0.5785 | 0 | 0 | 0 | 0.9659 Ref |
| LR595860 | Unassigned | Unassigned | Unassigned | 45_0    | Clustered           | 38 VC_45_0   | 38 | 0.5785 | 1          | 0.5785 | 0 | 0 | 0 | 0.9659 Ref |
| LR595861 | Unassigned | Unassigned | Unassigned | 45_0    | Clustered           | 38 VC_45_0   | 38 | 0.5785 | 1          | 0.5785 | 0 | 0 | 0 | 0.9659 Ref |
| LR595863 | Unassigned | Unassigned | Unassigned | 45_0    | Clustered           | 38 VC_45_0   | 38 | 0.5785 | 1          | 0.5785 | 0 | 0 | 0 | 0.9659 Ref |
| LR595864 | Unassigned | Unassigned | Unassigned | 45_0    | Clustered           | 38 VC_45_0   | 38 | 0.5785 | 1          | 0.5785 | 0 | 0 | 0 | 0.9659 Ref |
| LR595865 | Unassigned | Unassigned | Unassigned | 45_0    | Clustered           | 38 VC_45_0   | 38 | 0.5785 | 1          | 0.5785 | 0 | 0 | 0 | 0.9659 Ref |
| LR595866 | Unassigned | Unassigned | Unassigned | 45_0    | Clustered           | 38 VC_45_0   | 38 | 0.5785 | 1          | 0.5785 | 0 | 0 | 0 | 0.9659 Ref |
| LR595867 | Unassigned | Unassigned | Unassigned | 52_0    | Clustered           | 9 VC_52_0    | 9  | 0.5586 | 1          | 0.5586 | 0 | 0 | 0 | 1 Ref      |
| LR595868 | Unassigned | Unassigned | Unassigned | 53_0    | Clustered           | 10 VC_53_0   | 10 | 0.1743 | 1          | 0.1743 | 0 | 0 | 0 | 1 Ref      |
| LR595869 | Unassigned | Unassigned | Unassigned | 235_0   | Clustered           | 60 VC_235_0  | 60 | 0.9413 | 1          | 0.9413 | 0 | 0 | 0 | 1 Ref      |
| LR595870 | Unassigned | Unassigned | Unassigned | 235_0   | Clustered           | 60 VC_235_0  | 60 | 0.9413 | 1          | 0.9413 | 0 | 0 | 0 | 1 Ref      |
| LR595873 | Unassigned | Unassigned | Unassigned | 235_0   | Clustered           | 60 VC_235_0  | 60 | 0.9413 | 1          | 0.9413 | 0 | 0 | 0 | 1 Ref      |
| LR595883 | Unassigned | Unassigned | Unassigned | 235_0   | Clustered           | 60 VC_235_0  | 60 | 0.9413 | 1          | 0.9413 | 0 | 0 | 0 | 1 Ref      |
| LR595885 | Unassigned | Unassigned | Unassigned | 235_0   | Clustered           | 60 VC_235_0  | 60 | 0.9413 | 1          | 0.9413 | 0 | 0 | 0 | 1 Ref      |
| LR595887 | Unassigned | Unassigned | Unassigned | 235_0   | Clustered           | 60 VC_235_0  | 60 | 0.9413 | 1          | 0.9413 | 0 | 0 | 0 | 1 Ref      |
| LR595891 | Unassigned | Unassigned | Unassigned | 235_0   | Clustered           | 32 VC_235_0  | 32 | 0.9115 | 1          | 0.9115 | 0 | 0 | 0 | 1 Ref      |
| LR596614 | Unassigned | Unassigned | Unassigned | 976_0   | Clustered           | 36 VC_976_0  | 36 | 0.7833 | 1          | 0.7833 | 0 | 0 | 0 | 1 Ref      |
| LR596615 | Unassigned | Unassigned | Unassigned | 170_8   | Clustered           | 3 VC_170_8   | 3  | 0.0298 | 0.85155589 | 0.0254 | 0 | 0 | 0 | 1 Ref      |
| LR596902 | Unassigned | Unassigned | Unassigned | 1252_0  | Clustered           | 2 VC_1252_0  | 2  | 0.1373 | 0.95236699 | 0.1307 | 0 | 0 | 0 | 1 Ref      |
| LR596903 | Unassigned | Unassigned | Unassigned | 727_0   | Clustered           | 8 VC_727_0   | 8  | 0.6106 | 1          | 0.6106 | 0 | 0 | 0 | 0.9286 Ref |
| LR597635 | Unassigned | Unassigned | Unassigned | 45_0    | Clustered           | 38 VC_45_0   | 38 | 0.5785 | 1          | 0.5785 | 0 | 0 | 0 | 0.9659 Ref |
| LR597636 | Unassigned | Unassigned | Unassigned | 45_0    | Clustered           | 38 VC_45_0   | 38 | 0.5785 | 1          | 0.5785 | 0 | 0 | 0 | 0.9659 Ref |
| LR597637 | Unassigned | Unassigned | Unassigned | 5_0     | Clustered           | 27 VC_5_0    | 27 | 0.9599 | 1          | 0.9599 | 0 | 0 | 0 | 1 Ref      |
| LR597638 | Unassigned | Unassigned | Unassigned | 5_0     | Clustered           | 27 VC_5_0    | 27 | 0.9599 | 1          | 0.9599 | 0 | 0 | 0 | 1 Ref      |
| LR597639 | Unassigned | Unassigned | Unassigned | 45_0    | Clustered           | 38 VC_45_0   | 38 | 0.5785 | 1          | 0.5785 | 0 | 0 | 0 | 0.9659 Ref |
| LR597640 | Unassigned | Unassigned | Unassigned | 5_0     | Clustered           | 27 VC_5_0    | 27 | 0.9599 | 1          | 0.9599 | 0 | 0 | 0 | 1 Ref      |
| LR597641 | Unassigned | Unassigned | Unassigned | 53_0    | Clustered           | 10 VC_53_0   | 10 | 0.1743 | 1          | 0.1743 | 0 | 0 | 0 | 1 Ref      |
| LR597643 | Unassigned | Unassigned | Unassigned | 45_0    | Clustered           | 38 VC_45_0   | 38 | 0.5785 | 1          | 0.5785 | 0 | 0 | 0 | 0.9659 Ref |
| LR597644 | Unassigned | Unassigned | Unassigned | 45_0    | Clustered           | 38 VC_45_0   | 38 | 0.5785 | 1          | 0.5785 | 0 | 0 | 0 | 0.9659 Ref |
| LR597646 | Unassigned | Unassigned | Unassigned | 859_0   | Clustered           | 67 VC_859_0  | 67 | 0.9622 | 1          | 0.9622 | 0 | 0 | 0 | 1 Ref      |
| LR597647 | Unassigned | Unassigned | Unassigned | 794_9   | Clustered           | 7 VC_794_9   | 7  | 0.0369 | 0.87330366 | 0.0322 | 0 | 0 | 0 | 1 Ref      |
| LR597648 | Unassigned | Unassigned | Unassigned | 45_0    | Clustered           | 38 VC_45_0   | 38 | 0.5785 | 1          | 0.5785 | 0 | 0 | 0 | 0.9659 Ref |
| LR597649 | Unassigned | Unassigned | Unassigned | 5_0     | Clustered           | 27 VC_5_0    | 27 | 0.9599 | 1          | 0.9599 | 0 | 0 | 0 | 1 Ref      |
| LR597650 | Unassigned | Unassigned | Unassigned | 45_0    | Clustered           | 38 VC_45_0   | 38 | 0.5785 | 1          | 0.5785 | 0 | 0 | 0 | 0.9659 Ref |
| LR597651 | Unassigned | Unassigned | Unassigned | 45_0    | Clustered           | 38 VC_45_0   | 38 | 0.5785 | 1          | 0.5785 | 0 | 0 | 0 | 0.9659 Ref |
| LR597652 | Unassigned | Unassigned | Unassigned | 45_0    | Clustered           | 38 VC_45_0   | 38 | 0.5785 | 1          | 0.5785 | 0 | 0 | 0 | 0.9659 Ref |
| LR597653 | Unassigned | Unassigned | Unassigned | 45_0    | Clustered           | 38 VC_45_0   | 38 | 0.5785 | 1          | 0.5785 | 0 | 0 | 0 | 0.9659 Ref |
| LR597654 | Unassigned | Unassigned | Unassigned | 871_1   | Clustered           | 26 VC_871_1  | 26 | 0.6303 | 1          | 0.6303 | 0 | 0 | 0 | 0.9815 Ref |
| LR597655 | Unassigned | Unassigned | Unassigned | 198_14  | Clustered           | 3 VC_198_14  | 3  | 0.0142 | 0.99685589 | 0.0142 | 0 | 0 | 0 | 0.6667 Ref |
| LR597656 | Unassigned | Unassigned | Unassigned | 603_0   | Clustered           | 28 VC_603_0  | 28 | 0.7692 | 1          | 0.7692 | 0 | 0 | 0 | 1 Ref      |
| LR597657 | Unassigned | Unassigned | Unassigned | 290_137 | Clustered/Singleton | 1 VC_290_137 | 1  | 0      | 1          | 0      | 0 | 0 | 0 | 1 Ref      |
| LR597658 | Unassigned | Unassigned | Unassigned | 340_6   | Clustered           | 3 VC_340_6   | 3  | 0.0106 | 0.99833469 | 0.0106 | 0 | 0 | 0 | 1 Ref      |
| LR597659 | Unassigned | Unassigned | Unassigned | 198_24  | Clustered           | 5 VC_198_24  | 5  | 0.029  | 0.99999995 | 0.029  | 0 | 0 | 0 | 0.7 Ref    |
| LR597660 | Unassigned | Unassigned | Unassigned | 290_101 | Clustered/Singleton | 1 VC_290_101 | 1  | 0      | 1          | 0      | 0 | 0 | 0 | 1 Ref      |
| LR597663 | Unassigned | Unassigned | Unassigned | 340_9   | Clustered/Singleton | 1 VC_340_9   | 1  | 0      | 1          | 0      | 0 | 0 | 0 | 1 Ref      |
| LR694165 | Unassigned | Unassigned | Unassigned | 794_9   | Clustered           | 7 VC_794_9   | 7  | 0.0369 | 0.87330366 | 0.0322 | 0 | 0 | 0 | 1 Ref      |
| LR694610 | Unassigned | Unassigned | Unassigned | 794_7   | Clustered           | 2 VC_794_7   | 2  | 0.006  | 0.58868714 | 0.0035 | 0 | 0 | 0 | 1 Ref      |
| LR694611 | Unassigned | Unassigned | Unassigned | 794_7   | Clustered           | 2 VC_794_7   | 2  | 0.006  | 0.58868714 | 0.0035 | 0 | 0 | 0 | 1 Ref      |
| LR699048 | Unassigned | Unassigned | Unassigned | 340_7   | Clustered           | 18 VC_340_7  | 18 | 0.0936 | 1          | 0.0936 | 0 | 0 | 0 | 0.7778 Ref |
| LR699804 | Unassigned | Unassigned | Unassigned | 794_19  | Clustered           | 16 VC_794_19 | 16 | 0.0975 | 0.99616626 | 0.0971 | 0 | 0 | 0 | 0.8083 Ref |
| LR743523 | Unassigned | Unassigned | Unassigned | 118_0   | Clustered           | 13 VC_118_0  | 13 | 1      | 1          | 1      | 0 | 0 | 0 | 1 Ref      |
| LR743524 | Unassigned | Unassigned | Unassigned | 178_0   | Clustered           | 5 VC_178_0   | 5  | 0.3547 | 0.99999997 | 0.3547 | 0 | 0 | 0 | 1 Ref      |
| LR743528 | Unassigned | Unassigned | Unassigned | 118_0   | Clustered           | 13 VC_118_0  | 13 | 1      | 1          | 1      | 0 | 0 | 0 | 1 Ref      |
| LR743529 | Unassigned | Unassigned | Unassigned | 118_0   | Clustered           | 13 VC_118_0  | 13 | 1      | 1          | 1      | 0 | 0 | 0 | 1 Ref      |
| LR743530 | Unassigned | Unassigned | Unassigned | 766_0   | Clustered           | 40 VC_766_0  | 40 | 0.7511 | 1          | 0.7511 | 0 | 0 | 0 | 1 Ref      |
| LR743531 | Unassigned | Unassigned | Unassigned | 118_0   | Clustered           | 13 VC_118_0  | 13 | 1      | 1          | 1      | 0 | 0 | 0 | 1 Ref      |
| LR743532 | Unassigned | Unassigned | Unassigned | 175_0   | Clustered           | 20 VC_175_0  | 20 | 0.7504 | 1          | 0.7504 | 0 | 0 | 0 | 1 Ref      |



|           |            |            |            |         |                     |              |     |        |            |        |   |   |   |            |
|-----------|------------|------------|------------|---------|---------------------|--------------|-----|--------|------------|--------|---|---|---|------------|
| LR745206  | Unassigned | Unassigned | Unassigned | 551_1   | Clustered/Singleton | 1 VC_551_1   | 1   | 0      | 1          | 0      | 0 | 0 | 0 | 1 Ref      |
| LR745706  | Unassigned | Unassigned | Unassigned | 405_0   | Clustered           | 126 VC_405_0 | 126 | 0.9614 | 1          | 0.9614 | 0 | 0 | 0 | 1 Ref      |
| LR745707  | Unassigned | Unassigned | Unassigned | 405_0   | Clustered           | 126 VC_405_0 | 126 | 0.9614 | 1          | 0.9614 | 0 | 0 | 0 | 1 Ref      |
| LR745708  | Unassigned | Unassigned | Unassigned | 405_0   | Clustered           | 126 VC_405_0 | 126 | 0.9614 | 1          | 0.9614 | 0 | 0 | 0 | 1 Ref      |
| LR745709  | Unassigned | Unassigned | Unassigned | 405_0   | Clustered           | 126 VC_405_0 | 126 | 0.9614 | 1          | 0.9614 | 0 | 0 | 0 | 1 Ref      |
| LR745710  | Unassigned | Unassigned | Unassigned | 405_0   | Clustered           | 126 VC_405_0 | 126 | 0.9614 | 1          | 0.9614 | 0 | 0 | 0 | 1 Ref      |
| LR746137  | Unassigned | Unassigned | Unassigned | 871_1   | Clustered           | 26 VC_871_1  | 26  | 0.6303 | 1          | 0.6303 | 0 | 0 | 0 | 0.9815 Ref |
| LR746310  | Unassigned | Unassigned | Unassigned | 686_0   | Clustered           | 25 VC_686_0  | 25  | 0.5501 | 1          | 0.5501 | 0 | 0 | 0 | 0.96 Ref   |
| LR746311  | Unassigned | Unassigned | Unassigned | 290_141 | Clustered/Singleton | 1 VC_290_141 | 1   | 0      | 1          | 0      | 0 | 0 | 0 | 1 Ref      |
| LR756501  | Unassigned | Unassigned | Unassigned | 551_0   | Clustered           | 2 VC_551_0   | 2   | 0.2587 | 0.94530405 | 0.2445 | 0 | 0 | 0 | 1 Ref      |
| LR756502  | Unassigned | Unassigned | Unassigned | 551_2   | Clustered/Singleton | 1 VC_551_2   | 1   | 0      | 1          | 0      | 0 | 0 | 0 | 1 Ref      |
| LR756503  | Unassigned | Unassigned | Unassigned | 551_0   | Clustered           | 2 VC_551_0   | 2   | 0.2587 | 0.94530405 | 0.2445 | 0 | 0 | 0 | 1 Ref      |
| LR756504  | Unassigned | Unassigned | Unassigned | 551_3   | Clustered/Singleton | 1 VC_551_3   | 1   | 0      | 1          | 0      | 0 | 0 | 0 | 1 Ref      |
| LR757892  | Unassigned | Unassigned | Unassigned | 972_0   | Clustered           | 99 VC_972_0  | 99  | 0.9113 | 1          | 0.9113 | 0 | 0 | 0 | 0.9928 Ref |
| LR778216  | Unassigned | Unassigned | Unassigned | 75_0    | Clustered           | 15 VC_75_0   | 15  | 0.518  | 1          | 0.518  | 0 | 0 | 0 | 1 Ref      |
| LR794124  | Unassigned | Unassigned | Unassigned | 861_0   | Clustered           | 29 VC_861_0  | 29  | 0.9954 | 1          | 0.9954 | 0 | 0 | 0 | 1 Ref      |
| LR794146  | Unassigned | Unassigned | Unassigned | 31_0    | Clustered           | 10 VC_31_0   | 10  | 0.5129 | 1          | 0.5129 | 0 | 0 | 0 | 1 Ref      |
| LR794147  | Unassigned | Unassigned | Unassigned | 31_0    | Clustered           | 10 VC_31_0   | 10  | 0.5129 | 1          | 0.5129 | 0 | 0 | 0 | 1 Ref      |
| LR794148  | Unassigned | Unassigned | Unassigned | 31_0    | Clustered           | 10 VC_31_0   | 10  | 0.5129 | 1          | 0.5129 | 0 | 0 | 0 | 1 Ref      |
| LR794149  | Unassigned | Unassigned | Unassigned | 31_0    | Clustered           | 10 VC_31_0   | 10  | 0.5129 | 1          | 0.5129 | 0 | 0 | 0 | 1 Ref      |
| LR794150  | Unassigned | Unassigned | Unassigned | 31_0    | Clustered           | 10 VC_31_0   | 10  | 0.5129 | 1          | 0.5129 | 0 | 0 | 0 | 1 Ref      |
| LR794151  | Unassigned | Unassigned | Unassigned | 31_0    | Clustered           | 10 VC_31_0   | 10  | 0.5129 | 1          | 0.5129 | 0 | 0 | 0 | 1 Ref      |
| LR794152  | Unassigned | Unassigned | Unassigned | 31_0    | Clustered           | 10 VC_31_0   | 10  | 0.5129 | 1          | 0.5129 | 0 | 0 | 0 | 1 Ref      |
| LR797314  | Unassigned | Unassigned | Unassigned | 193_0   | Clustered           | 3 VC_193_0   | 3   | 0.4439 | 0.97148006 | 0.4313 | 0 | 0 | 0 | 1 Ref      |
| LR797923  | Unassigned | Unassigned | Unassigned | 31_0    | Clustered           | 10 VC_31_0   | 10  | 0.5129 | 1          | 0.5129 | 0 | 0 | 0 | 1 Ref      |
| LR800396  | Unassigned | Unassigned | Unassigned | 135_13  | Clustered           | 2 VC_135_13  | 2   | 0.005  | 0.86394392 | 0.0044 | 0 | 0 | 0 | 1 Ref      |
| LR811967  | Unassigned | Unassigned | Unassigned | 135_28  | Clustered           | 3 VC_135_28  | 3   | 0.0105 | 0.97349514 | 0.0102 | 0 | 0 | 0 | 0.6667 Ref |
| LR811968  | Unassigned | Unassigned | Unassigned | 135_4   | Clustered/Singleton | 1 VC_135_4   | 1   | 0      | 1          | 0      | 0 | 0 | 0 | 1 Ref      |
| LR811969  | Unassigned | Unassigned | Unassigned | 135_28  | Clustered           | 3 VC_135_28  | 3   | 0.0105 | 0.97349514 | 0.0102 | 0 | 0 | 0 | 0.6667 Ref |
| LR813619  | Unassigned | Unassigned | Unassigned | 817_0   | Clustered           | 12 VC_817_0  | 12  | 0.8497 | 1          | 0.8497 | 0 | 0 | 0 | 1 Ref      |
| LR865361  | Unassigned | Unassigned | Unassigned | 872_0   | Clustered           | 28 VC_872_0  | 28  | 0.7887 | 1          | 0.7887 | 0 | 0 | 0 | 1 Ref      |
| LR877331  | Unassigned | Unassigned | Unassigned | 509_0   | Clustered           | 36 VC_509_0  | 36  | 0.5291 | 1          | 0.5291 | 0 | 0 | 0 | 0.9714 Ref |
| LR877332  | Unassigned | Unassigned | Unassigned | 290_67  | Clustered           | 2 VC_290_67  | 2   | 0.0027 | 0.90726003 | 0.0025 | 0 | 0 | 0 | 1 Ref      |
| LR880803  | Unassigned | Unassigned | Unassigned | 340_3   | Clustered           | 24 VC_340_3  | 24  | 0.1205 | 1          | 0.1205 | 0 | 0 | 0 | 0.7283 Ref |
| LR881104  | Unassigned | Unassigned | Unassigned | 359_0   | Clustered           | 3 VC_359_0   | 3   | 0.1509 | 0.99844728 | 0.1507 | 0 | 0 | 0 | 1 Ref      |
| LR900702  | Unassigned | Unassigned | Unassigned | 859_0   | Clustered           | 67 VC_859_0  | 67  | 0.9622 | 1          | 0.9622 | 0 | 0 | 0 | 1 Ref      |
| LR900704  | Unassigned | Unassigned | Unassigned | 290_38  | Clustered/Singleton | 1 VC_290_38  | 1   | 0      | 1          | 0      | 0 | 0 | 0 | 1 Ref      |
| LR900835  | Unassigned | Unassigned | Unassigned | 94_0    | Clustered           | 22 VC_94_0   | 22  | 0.5602 | 1          | 0.5602 | 0 | 0 | 0 | 1 Ref      |
| LR9009870 | Unassigned | Unassigned | Unassigned | 859_0   | Clustered           | 67 VC_859_0  | 67  | 0.9622 | 1          | 0.9622 | 0 | 0 | 0 | 1 Ref      |
| LR9009871 | Unassigned | Unassigned | Unassigned | 801_0   | Clustered           | 37 VC_801_0  | 37  | 0.5672 | 1          | 0.5672 | 0 | 0 | 0 | 1 Ref      |
| LT546029  | Unassigned | Unassigned | Unassigned | 707_1   | Clustered           | 5 VC_707_1   | 5   | 0.4294 | 0.99999994 | 0.4294 | 0 | 0 | 0 | 1 Ref      |
| LT594300  | Unassigned | Unassigned | Unassigned | 465_0   | Clustered           | 80 VC_465_0  | 80  | 0.9988 | 1          | 0.9988 | 0 | 0 | 0 | 1 Ref      |
| LT598654  | Unassigned | Unassigned | Unassigned | 68_5    | Clustered/Singleton | 1 VC_68_5    | 1   | 0      | 1          | 0      | 0 | 0 | 0 | 1 Ref      |
| LT603033  | Unassigned | Unassigned | Unassigned | 170_11  | Clustered           | 10 VC_170_11 | 10  | 0.1502 | 0.99999797 | 0.1502 | 0 | 0 | 0 | 0.9111 Ref |
| LT603684  | Unassigned | Unassigned | Unassigned | 645_0   | Clustered           | 20 VC_645_0  | 20  | 0.8502 | 1          | 0.8502 | 0 | 0 | 0 | 1 Ref      |
| LT607758  | Unassigned | Unassigned | Unassigned | 686_0   | Clustered           | 25 VC_686_0  | 25  | 0.5501 | 1          | 0.5501 | 0 | 0 | 0 | 0.96 Ref   |
| LT608331  | Unassigned | Unassigned | Unassigned | 185_0   | Clustered           | 53 VC_185_0  | 53  | 0.9153 | 1          | 0.9153 | 0 | 0 | 0 | 1 Ref      |
| LT615366  | Unassigned | Unassigned | Unassigned | 707_1   | Clustered           | 5 VC_707_1   | 5   | 0.4294 | 0.99999994 | 0.4294 | 0 | 0 | 0 | 1 Ref      |
| LT630001  | Unassigned | Unassigned | Unassigned | 1003_0  | Clustered           | 16 VC_1003_0 | 16  | 0.8967 | 1          | 0.8967 | 0 | 0 | 0 | 1 Ref      |
| LT714109  | Unassigned | Unassigned | Unassigned | 30_1    | Clustered           | 53 VC_30_1   | 53  | 0.7151 | 1          | 0.7151 | 0 | 0 | 0 | 0.9325 Ref |
| LT841304  | Unassigned | Unassigned | Unassigned | 976_0   | Clustered           | 36 VC_976_0  | 36  | 0.7833 | 1          | 0.7833 | 0 | 0 | 0 | 1 Ref      |
| LT898437  | Unassigned | Unassigned | Unassigned | 322_0   | Clustered           | 12 VC_322_0  | 12  | 0.8924 | 1          | 0.8924 | 0 | 0 | 0 | 1 Ref      |
| LT907986  | Unassigned | Unassigned | Unassigned | 819_0   | Clustered           | 19 VC_819_0  | 19  | 0.6835 | 1          | 0.6835 | 0 | 0 | 0 | 1 Ref      |
| LT960551  | Unassigned | Unassigned | Unassigned | 170_8   | Clustered           | 3 VC_170_8   | 3   | 0.0298 | 0.85155589 | 0.0254 | 0 | 0 | 0 | 1 Ref      |
| LT960552  | Unassigned | Unassigned | Unassigned | 170_8   | Clustered           | 3 VC_170_8   | 3   | 0.0298 | 0.85155589 | 0.0254 | 0 | 0 | 0 | 1 Ref      |
| LT960606  | Unassigned | Unassigned | Unassigned | 399_0   | Clustered           | 49 VC_399_0  | 49  | 0.7927 | 1          | 0.7927 | 0 | 0 | 0 | 1 Ref      |
| LT960608  | Unassigned | Unassigned | Unassigned | 87_3    | Clustered           | 19 VC_87_3   | 19  | 0.3645 | 1          | 0.3645 | 0 | 0 | 0 | 0.807 Ref  |
| LT960609  | Unassigned | Unassigned | Unassigned | 859_0   | Clustered           | 67 VC_859_0  | 67  | 0.9622 | 1          | 0.9622 | 0 | 0 | 0 | 1 Ref      |
| LT961732  | Unassigned | Unassigned | Unassigned | 976_0   | Clustered           | 36 VC_976_0  | 36  | 0.7833 | 1          | 0.7833 | 0 | 0 | 0 | 1 Ref      |
| LT961836  | Unassigned | Unassigned | Unassigned | 399_0   | Clustered           | 49 VC_399_0  | 49  | 0.7927 | 1          | 0.7927 | 0 | 0 | 0 | 1 Ref      |
| LT961837  | Unassigned | Unassigned | Unassigned | 399_0   | Clustered           | 49 VC_399_0  | 49  | 0.7927 | 1          | 0.7927 | 0 | 0 | 0 | 1 Ref      |
| LT961838  | Unassigned | Unassigned | Unassigned | 399_0   | Clustered           | 49 VC_399_0  | 49  | 0.7927 | 1          | 0.7927 | 0 | 0 | 0 | 1 Ref      |
| LT961840  | Unassigned | Unassigned | Unassigned | 399_0   | Clustered           | 49 VC_399_0  | 49  | 0.7927 | 1          | 0.7927 | 0 | 0 | 0 | 1 Ref      |
| LT961841  | Unassigned | Unassigned | Unassigned | 399_0   | Clustered           | 49 VC_399_0  | 49  | 0.7927 | 1          | 0.7927 | 0 | 0 | 0 | 1 Ref      |
| LT961842  | Unassigned | Unassigned | Unassigned | 399_0   | Clustered           | 49 VC_399_0  | 49  | 0.7927 | 1          | 0.7927 | 0 | 0 | 0 | 1 Ref      |
| LT961843  | Unassigned | Unassigned | Unassigned | 399_0   | Clustered           | 49 VC_399_0  | 49  | 0.7927 | 1          | 0.7927 | 0 | 0 | 0 | 1 Ref      |
| LT961844  | Unassigned | Unassigned | Unassigned | 399_0   | Clustered           | 49 VC_399_0  | 49  | 0.7927 | 1          | 0.7927 | 0 | 0 | 0 | 1 Ref      |
| LT961845  | Unassigned | Unassigned | Unassigned | 399_0   | Clustered           | 49 VC_399_0  | 49  | 0.7927 | 1          | 0.7927 | 0 | 0 | 0 | 1 Ref      |
| LT961846  | Unassigned | Unassigned | Unassigned | 399_0   | Clustered           | 49 VC_399_0  | 49  | 0.7927 | 1          | 0.7927 | 0 | 0 | 0 | 1 Ref      |
| LT962379  | Unassigned | Unassigned | Unassigned | 399_0   | Clustered           | 49 VC_399_0  | 49  | 0.7927 | 1          | 0.7927 | 0 | 0 | 0 | 1 Ref      |
| LT962380  | Unassigned | Unassigned | Unassigned | 399_0   | Clustered           | 49 VC_399_0  | 49  | 0.7927 | 1          | 0.7927 | 0 | 0 | 0 | 1 Ref      |
| LT962475  | Unassigned | Unassigned | Unassigned | 399_0   | Clustered           | 49 VC_399_0  | 49  | 0.7927 | 1          | 0.7927 | 0 | 0 | 0 | 1 Ref      |
| LT962906  | Unassigned | Unassigned | Unassigned | 399_0   | Clustered           | 49 VC_399_0  | 49  | 0.7927 | 1          | 0.7927 | 0 | 0 | 0 | 1 Ref      |
| LT962907  | Unassigned | Unassigned | Unassigned | 399_0   | Clustered           | 49 VC_399_0  | 49  | 0.7927 | 1          | 0.7927 | 0 | 0 | 0 | 1 Ref      |
| LT985568  | Unassigned | Unassigned | Unassigned | 266_0   | Clustered           | 13 VC_266_0  | 13  | 0.3622 | 1          | 0.3622 | 0 | 0 | 0 | 1 Ref      |
| LT985569  | Unassigned | Unassigned | Unassigned | 269_0   | Clustered           | 7 VC_269_0   | 7   | 0.2278 | 1          | 0.2278 | 0 | 0 | 0 | 1 Ref      |
| LT985571  | Unassigned | Unassigned | Unassigned | 266_0   | Clustered           | 13 VC_266_0  | 13  | 0.3622 | 1          | 0.3622 | 0 | 0 | 0 | 1 Ref      |
| LT985572  | Unassigned | Unassigned | Unassigned | 351_0   | Clustered           | 9 VC_351_0   | 9   | 0.9391 | 0.99999913 | 0.9391 | 0 | 0 | 0 | 1 Ref      |
| LT985574  | Unassigned | Unassigned | Unassigned | 269_0   | Clustered           | 7 VC_269_0   | 7   | 0.2278 | 1          | 0.2278 | 0 | 0 | 0 | 1 Ref      |
| LT985575  | Unassigned | Unassigned | Unassigned | 271_0   | Clustered           | 12 VC_271_0  | 12  | 0.4255 | 1          | 0.4255 | 0 | 0 | 0 | 1 Ref      |
| LT985576  | Unassigned | Unassigned | Unassigned | 271_0   | Clustered           | 12 VC_271_0  | 12  | 0.4255 | 1          | 0.4255 | 0 | 0 | 0 | 1 Ref      |



|          |            |            |            |         |                     |              |     |        |            |        |   |   |   |            |
|----------|------------|------------|------------|---------|---------------------|--------------|-----|--------|------------|--------|---|---|---|------------|
| LT985578 | Unassigned | Unassigned | Unassigned | 269_0   | Clustered           | 7 VC_269_0   | 7   | 0.2278 | 1          | 0.2278 | 0 | 0 | 0 | 1 Ref      |
| LT985581 | Unassigned | Unassigned | Unassigned | 351_0   | Clustered           | 9 VC_351_0   | 9   | 0.9391 | 0.99999913 | 0.9391 | 0 | 0 | 0 | 1 Ref      |
| LT985583 | Unassigned | Unassigned | Unassigned | 269_0   | Clustered           | 7 VC_269_0   | 7   | 0.2278 | 1          | 0.2278 | 0 | 0 | 0 | 1 Ref      |
| LT985584 | Unassigned | Unassigned | Unassigned | 351_0   | Clustered           | 9 VC_351_0   | 9   | 0.9391 | 0.99999913 | 0.9391 | 0 | 0 | 0 | 1 Ref      |
| LT985586 | Unassigned | Unassigned | Unassigned | 351_0   | Clustered           | 9 VC_351_0   | 9   | 0.9391 | 0.99999913 | 0.9391 | 0 | 0 | 0 | 1 Ref      |
| LT985587 | Unassigned | Unassigned | Unassigned | 351_0   | Clustered           | 9 VC_351_0   | 9   | 0.9391 | 0.99999913 | 0.9391 | 0 | 0 | 0 | 1 Ref      |
| LT985589 | Unassigned | Unassigned | Unassigned | 308_0   | Clustered           | 2 VC_308_0   | 2   | 0.1277 | 0.94930205 | 0.1213 | 0 | 0 | 0 | 1 Ref      |
| LT985593 | Unassigned | Unassigned | Unassigned | 351_0   | Clustered           | 9 VC_351_0   | 9   | 0.9391 | 0.99999913 | 0.9391 | 0 | 0 | 0 | 1 Ref      |
| LT986460 | Unassigned | Unassigned | Unassigned | 772_0   | Clustered           | 9 VC_772_0   | 9   | 0.4468 | 1          | 0.4468 | 0 | 0 | 0 | 1 Ref      |
| LT986678 | Unassigned | Unassigned | Unassigned | 1267_0  | Clustered           | 26 VC_1267_0 | 26  | 0.9597 | 0.99999998 | 0.9597 | 0 | 0 | 0 | 1 Ref      |
| LT993224 | Unassigned | Unassigned | Unassigned | 266_0   | Clustered           | 13 VC_266_0  | 13  | 0.3622 | 1          | 0.3622 | 0 | 0 | 0 | 1 Ref      |
| LT993227 | Unassigned | Unassigned | Unassigned | 351_0   | Clustered           | 9 VC_351_0   | 9   | 0.9391 | 0.99999913 | 0.9391 | 0 | 0 | 0 | 1 Ref      |
| LT993229 | Unassigned | Unassigned | Unassigned | 269_0   | Clustered           | 7 VC_269_0   | 7   | 0.2278 | 1          | 0.2278 | 0 | 0 | 0 | 1 Ref      |
| LT993247 | Unassigned | Unassigned | Unassigned | 308_0   | Clustered           | 2 VC_308_0   | 2   | 0.1277 | 0.94930205 | 0.1213 | 0 | 0 | 0 | 1 Ref      |
| LT996080 | Unassigned | Unassigned | Unassigned | 351_0   | Clustered           | 9 VC_351_0   | 9   | 0.9391 | 0.99999913 | 0.9391 | 0 | 0 | 0 | 1 Ref      |
| LT996081 | Unassigned | Unassigned | Unassigned | 271_0   | Clustered           | 12 VC_271_0  | 12  | 0.4255 | 1          | 0.4255 | 0 | 0 | 0 | 1 Ref      |
| LT996082 | Unassigned | Unassigned | Unassigned | 269_0   | Clustered           | 7 VC_269_0   | 7   | 0.2278 | 1          | 0.2278 | 0 | 0 | 0 | 1 Ref      |
| LT999987 | Unassigned | Unassigned | Unassigned | 185_0   | Clustered           | 53 VC_185_0  | 53  | 0.9153 | 1          | 0.9153 | 0 | 0 | 0 | 1 Ref      |
| MF001354 | Unassigned | Unassigned | Unassigned | 290_79  | Clustered/Singleton | 1 VC_290_79  | 1   | 0      | 1          | 0      | 0 | 0 | 0 | 1 Ref      |
| MF001355 | Unassigned | Unassigned | Unassigned | 295_3   | Clustered           | 3 VC_295_3   | 3   | 0.0443 | 0.99844642 | 0.0442 | 0 | 0 | 0 | 1 Ref      |
| MF001356 | Unassigned | Unassigned | Unassigned | 654_0   | Clustered           | 115 VC_654_0 | 115 | 0.7303 | 1          | 0.7303 | 0 | 0 | 0 | 0.8764 Ref |
| MF001358 | Unassigned | Unassigned | Unassigned | 708_0   | Clustered           | 2 VC_708_0   | 2   | 0.4166 | 0.95368907 | 0.3973 | 0 | 0 | 0 | 1 Ref      |
| MF001359 | Unassigned | Unassigned | Unassigned | 290_183 | Clustered/Singleton | 1 VC_290_183 | 1   | 0      | 1          | 0      | 0 | 0 | 0 | 1 Ref      |
| MF001360 | Unassigned | Unassigned | Unassigned | 290_14  | Clustered/Singleton | 1 VC_290_14  | 1   | 0      | 1          | 0      | 0 | 0 | 0 | 1 Ref      |
| MF001361 | Unassigned | Unassigned | Unassigned | 708_0   | Clustered           | 2 VC_708_0   | 2   | 0.4166 | 0.95368907 | 0.3973 | 0 | 0 | 0 | 1 Ref      |
| MF001362 | Unassigned | Unassigned | Unassigned | 135_24  | Clustered/Singleton | 1 VC_135_24  | 1   | 0      | 1          | 0      | 0 | 0 | 0 | 1 Ref      |
| MF001363 | Unassigned | Unassigned | Unassigned | 199_16  | Clustered           | 12 VC_199_16 | 12  | 0.064  | 1          | 0.064  | 0 | 0 | 0 | 0.9394 Ref |
| MF001365 | Unassigned | Unassigned | Unassigned | 155_15  | Clustered           | 16 VC_155_15 | 16  | 0.0779 | 1          | 0.0779 | 0 | 0 | 0 | 0.8083 Ref |
| MF001366 | Unassigned | Unassigned | Unassigned | 654_0   | Clustered           | 115 VC_654_0 | 115 | 0.7303 | 1          | 0.7303 | 0 | 0 | 0 | 0.8764 Ref |
| MF033347 | Unassigned | Unassigned | Unassigned | 714_0   | Clustered           | 71 VC_714_0  | 71  | 0.935  | 1          | 0.935  | 0 | 0 | 0 | 1 Ref      |
| MF033348 | Unassigned | Unassigned | Unassigned | 714_0   | Clustered           | 71 VC_714_0  | 71  | 0.935  | 1          | 0.935  | 0 | 0 | 0 | 1 Ref      |
| MF033349 | Unassigned | Unassigned | Unassigned | 714_0   | Clustered           | 71 VC_714_0  | 71  | 0.935  | 1          | 0.935  | 0 | 0 | 0 | 1 Ref      |
| MF033350 | Unassigned | Unassigned | Unassigned | 714_0   | Clustered           | 71 VC_714_0  | 71  | 0.935  | 1          | 0.935  | 0 | 0 | 0 | 1 Ref      |
| MF033351 | Unassigned | Unassigned | Unassigned | 714_0   | Clustered           | 71 VC_714_0  | 71  | 0.935  | 1          | 0.935  | 0 | 0 | 0 | 1 Ref      |
| MF034659 | Unassigned | Unassigned | Unassigned | 433_0   | Clustered           | 5 VC_433_0   | 5   | 0.2526 | 0.99999998 | 0.2526 | 0 | 0 | 0 | 1 Ref      |
| MF038790 | Unassigned | Unassigned | Unassigned | 1204_0  | Clustered           | 25 VC_1204_0 | 25  | 0.7382 | 1          | 0.7382 | 0 | 0 | 0 | 1 Ref      |
| MF038791 | Unassigned | Unassigned | Unassigned | 1204_0  | Clustered           | 25 VC_1204_0 | 25  | 0.7382 | 1          | 0.7382 | 0 | 0 | 0 | 1 Ref      |
| MF041990 | Unassigned | Unassigned | Unassigned | 315_0   | Clustered           | 4 VC_315_0   | 4   | 0.2058 | 0.99995817 | 0.2057 | 0 | 0 | 0 | 1 Ref      |
| MF042360 | Unassigned | Unassigned | Unassigned | 356_5   | Clustered/Singleton | 1 VC_356_5   | 1   | 0      | 1          | 0      | 0 | 0 | 0 | 1 Ref      |
| MF044457 | Unassigned | Unassigned | Unassigned | 293_13  | Clustered           | 10 VC_293_13 | 10  | 0.0698 | 0.99999931 | 0.0698 | 0 | 0 | 0 | 0.9556 Ref |
| MF044458 | Unassigned | Unassigned | Unassigned | 816_0   | Clustered           | 35 VC_816_0  | 35  | 0.9824 | 1          | 0.9824 | 0 | 0 | 0 | 1 Ref      |
| MF063068 | Unassigned | Unassigned | Unassigned | 356_2   | Clustered/Singleton | 1 VC_356_2   | 1   | 0      | 1          | 0      | 0 | 0 | 0 | 1 Ref      |
| MF072690 | Unassigned | Unassigned | Unassigned | 566_3   | Clustered           | 4 VC_566_3   | 4   | 0.0418 | 0.92781401 | 0.0388 | 0 | 0 | 0 | 1 Ref      |
| MF074189 | Unassigned | Unassigned | Unassigned | 629_0   | Clustered           | 4 VC_629_0   | 4   | 0.4856 | 0.99992419 | 0.4856 | 0 | 0 | 0 | 1 Ref      |
| MF093736 | Unassigned | Unassigned | Unassigned | 595_0   | Clustered           | 35 VC_595_0  | 35  | 0.8809 | 1          | 0.8809 | 0 | 0 | 0 | 1 Ref      |
| MF098558 | Unassigned | Unassigned | Unassigned | 1132_0  | Clustered           | 4 VC_1132_0  | 4   | 1      | 1          | 1      | 0 | 0 | 0 | 1 Ref      |
| MF101922 | Unassigned | Unassigned | Unassigned | 1268_0  | Clustered           | 2 VC_1268_0  | 2   | 1      | 1          | 1      | 0 | 0 | 0 | 1 Ref      |
| MF133445 | Unassigned | Unassigned | Unassigned | 566_3   | Clustered           | 4 VC_566_3   | 4   | 0.0418 | 0.92781401 | 0.0388 | 0 | 0 | 0 | 1 Ref      |
| MF133446 | Unassigned | Unassigned | Unassigned | 537_0   | Clustered           | 39 VC_537_0  | 39  | 0.8148 | 1          | 0.8148 | 0 | 0 | 0 | 1 Ref      |
| MF140397 | Unassigned | Unassigned | Unassigned | 1207_0  | Clustered           | 20 VC_1207_0 | 20  | 0.9898 | 1          | 0.9898 | 0 | 0 | 0 | 1 Ref      |
| MF140398 | Unassigned | Unassigned | Unassigned | 244_1   | Clustered           | 13 VC_244_1  | 13  | 0.1766 | 1          | 0.1766 | 0 | 0 | 0 | 0.7308 Ref |
| MF140399 | Unassigned | Unassigned | Unassigned | 537_0   | Clustered           | 39 VC_537_0  | 39  | 0.8148 | 1          | 0.8148 | 0 | 0 | 0 | 1 Ref      |
| MF140400 | Unassigned | Unassigned | Unassigned | 1200_0  | Clustered           | 73 VC_1200_0 | 73  | 0.9825 | 1          | 0.9825 | 0 | 0 | 0 | 1 Ref      |
| MF140401 | Unassigned | Unassigned | Unassigned | 1204_0  | Clustered           | 25 VC_1204_0 | 25  | 0.7382 | 1          | 0.7382 | 0 | 0 | 0 | 1 Ref      |
| MF140402 | Unassigned | Unassigned | Unassigned | 241_0   | Clustered           | 21 VC_241_0  | 21  | 0.8342 | 1          | 0.8342 | 0 | 0 | 0 | 1 Ref      |
| MF140403 | Unassigned | Unassigned | Unassigned | 223_3   | Clustered           | 8 VC_223_3   | 8   | 0.0699 | 1          | 0.0699 | 0 | 0 | 0 | 0.8571 Ref |
| MF140404 | Unassigned | Unassigned | Unassigned | 1200_0  | Clustered           | 73 VC_1200_0 | 73  | 0.9825 | 1          | 0.9825 | 0 | 0 | 0 | 1 Ref      |
| MF140405 | Unassigned | Unassigned | Unassigned | 918_0   | Clustered           | 16 VC_918_0  | 16  | 0.2945 | 1          | 0.2945 | 0 | 0 | 0 | 1 Ref      |
| MF140406 | Unassigned | Unassigned | Unassigned | 244_1   | Clustered           | 13 VC_244_1  | 13  | 0.1766 | 1          | 0.1766 | 0 | 0 | 0 | 0.7308 Ref |
| MF140407 | Unassigned | Unassigned | Unassigned | 1200_0  | Clustered           | 73 VC_1200_0 | 73  | 0.9825 | 1          | 0.9825 | 0 | 0 | 0 | 1 Ref      |
| MF140409 | Unassigned | Unassigned | Unassigned | 985_0   | Clustered           | 38 VC_985_0  | 38  | 0.9334 | 1          | 0.9334 | 0 | 0 | 0 | 1 Ref      |
| MF140410 | Unassigned | Unassigned | Unassigned | 228_0   | Clustered           | 22 VC_228_0  | 22  | 0.7411 | 1          | 0.7411 | 0 | 0 | 0 | 1 Ref      |
| MF140412 | Unassigned | Unassigned | Unassigned | 243_0   | Clustered           | 72 VC_243_0  | 72  | 0.8089 | 1          | 0.8089 | 0 | 0 | 0 | 1 Ref      |
| MF140413 | Unassigned | Unassigned | Unassigned | 918_0   | Clustered           | 16 VC_918_0  | 16  | 0.2945 | 1          | 0.2945 | 0 | 0 | 0 | 1 Ref      |
| MF140414 | Unassigned | Unassigned | Unassigned | 918_0   | Clustered           | 16 VC_918_0  | 16  | 0.2945 | 1          | 0.2945 | 0 | 0 | 0 | 1 Ref      |
| MF140415 | Unassigned | Unassigned | Unassigned | 985_0   | Clustered           | 38 VC_985_0  | 38  | 0.9334 | 1          | 0.9334 | 0 | 0 | 0 | 1 Ref      |
| MF140416 | Unassigned | Unassigned | Unassigned | 243_1   | Clustered           | 5 VC_243_1   | 5   | 0.0356 | 0.99999997 | 0.0356 | 0 | 0 | 0 | 1 Ref      |
| MF140417 | Unassigned | Unassigned | Unassigned | 985_0   | Clustered           | 38 VC_985_0  | 38  | 0.9334 | 1          | 0.9334 | 0 | 0 | 0 | 1 Ref      |
| MF140418 | Unassigned | Unassigned | Unassigned | 1210_0  | Clustered           | 7 VC_1210_0  | 7   | 0.9808 | 0.99995963 | 0.9807 | 0 | 0 | 0 | 1 Ref      |
| MF140419 | Unassigned | Unassigned | Unassigned | 985_0   | Clustered           | 38 VC_985_0  | 38  | 0.9334 | 1          | 0.9334 | 0 | 0 | 0 | 1 Ref      |
| MF140420 | Unassigned | Unassigned | Unassigned | 985_0   | Clustered           | 38 VC_985_0  | 38  | 0.9334 | 1          | 0.9334 | 0 | 0 | 0 | 1 Ref      |
| MF140421 | Unassigned | Unassigned | Unassigned | 918_0   | Clustered           | 16 VC_918_0  | 16  | 0.2945 | 1          | 0.2945 | 0 | 0 | 0 | 1 Ref      |
| MF140422 | Unassigned | Unassigned | Unassigned | 917_0   | Clustered           | 28 VC_917_0  | 28  | 0.5465 | 1          | 0.5465 | 0 | 0 | 0 | 1 Ref      |
| MF140423 | Unassigned | Unassigned | Unassigned | 1204_0  | Clustered           | 25 VC_1204_0 | 25  | 0.7382 | 1          | 0.7382 | 0 | 0 | 0 | 1 Ref      |
| MF140424 | Unassigned | Unassigned | Unassigned | 1200_0  | Clustered           | 73 VC_1200_0 | 73  | 0.9825 | 1          | 0.9825 | 0 | 0 | 0 | 1 Ref      |
| MF140425 | Unassigned | Unassigned | Unassigned | 1200_0  | Clustered           | 73 VC_1200_0 | 73  | 0.9825 | 1          | 0.9825 | 0 | 0 | 0 | 1 Ref      |
| MF140426 | Unassigned | Unassigned | Unassigned | 985_0   | Clustered           | 38 VC_985_0  | 38  | 0.9334 | 1          | 0.9334 | 0 | 0 | 0 | 1 Ref      |
| MF140427 | Unassigned | Unassigned | Unassigned | 1210_0  | Clustered           | 7 VC_1210_0  | 7   | 0.9808 | 0.99995963 | 0.9807 | 0 | 0 | 0 | 1 Ref      |
| MF140428 | Unassigned | Unassigned | Unassigned | 243_0   | Clustered           | 72 VC_243_0  | 72  | 0.8089 | 1          | 0.8089 | 0 | 0 | 0 | 1 Ref      |
| MF140429 | Unassigned | Unassigned | Unassigned | 985_0   | Clustered           | 38 VC_985_0  | 38  | 0.9334 | 1          | 0.9334 | 0 | 0 | 0 | 1 Ref      |
| MF140430 | Unassigned | Unassigned | Unassigned | 243_0   | Clustered           | 72 VC_243_0  | 72  | 0.8089 | 1          | 0.8089 | 0 | 0 | 0 | 1 Ref      |



|          |            |            |            |         |                     |              |     |        |            |        |   |   |   |            |
|----------|------------|------------|------------|---------|---------------------|--------------|-----|--------|------------|--------|---|---|---|------------|
| MFI40431 | Unassigned | Unassigned | Unassigned | 985_0   | Clustered           | 38 VC_985_0  | 38  | 0.9334 | 1          | 0.9334 | 0 | 0 | 0 | 1 Ref      |
| MFI40432 | Unassigned | Unassigned | Unassigned | 1204_0  | Clustered           | 25 VC_1204_0 | 25  | 0.7382 | 1          | 0.7382 | 0 | 0 | 0 | 1 Ref      |
| MFI40433 | Unassigned | Unassigned | Unassigned | 985_0   | Clustered           | 38 VC_985_0  | 38  | 0.9334 | 1          | 0.9334 | 0 | 0 | 0 | 1 Ref      |
| MFI40434 | Unassigned | Unassigned | Unassigned | 1210_0  | Clustered           | 7 VC_1210_0  | 7   | 0.9808 | 0.99995963 | 0.9807 | 0 | 0 | 0 | 1 Ref      |
| MFI40435 | Unassigned | Unassigned | Unassigned | 241_0   | Clustered           | 21 VC_241_0  | 21  | 0.8342 | 1          | 0.8342 | 0 | 0 | 0 | 1 Ref      |
| MFI41540 | Unassigned | Unassigned | Unassigned | 784_0   | Clustered           | 9 VC_784_0   | 9   | 0.0884 | 1          | 0.0884 | 0 | 0 | 0 | 1 Ref      |
| MFI50911 | Unassigned | Unassigned | Unassigned | 166_0   | Clustered           | 2 VC_166_0   | 2   | 0.4832 | 0.94544348 | 0.4568 | 0 | 0 | 0 | 1 Ref      |
| MFI53391 | Unassigned | Unassigned | Unassigned | 655_0   | Clustered           | 45 VC_655_0  | 45  | 0.7722 | 1          | 0.7722 | 0 | 0 | 0 | 1 Ref      |
| MFI55889 | Unassigned | Unassigned | Unassigned | 904_0   | Clustered           | 10 VC_904_0  | 10  | 0.9878 | 0.99948433 | 0.9873 | 0 | 0 | 0 | 1 Ref      |
| MFI55936 | Unassigned | Unassigned | Unassigned | 1087_0  | Clustered           | 7 VC_1087_0  | 7   | 0.94   | 1          | 0.94   | 0 | 0 | 0 | 1 Ref      |
| MFI55946 | Unassigned | Unassigned | Unassigned | 1114_2  | Clustered           | 5 VC_1114_2  | 5   | 0.0531 | 0.99997362 | 0.0531 | 0 | 0 | 0 | 0.9 Ref    |
| MFI55947 | Unassigned | Unassigned | Unassigned | 384_11  | Clustered           | 31 VC_384_11 | 31  | 0.0926 | 1          | 0.0926 | 0 | 0 | 0 | 0.7011 Ref |
| MFI56577 | Unassigned | Unassigned | Unassigned | 843_0   | Clustered           | 20 VC_843_0  | 20  | 0.9621 | 1          | 0.9621 | 0 | 0 | 0 | 1 Ref      |
| MFI56578 | Unassigned | Unassigned | Unassigned | 843_0   | Clustered           | 20 VC_843_0  | 20  | 0.9621 | 1          | 0.9621 | 0 | 0 | 0 | 1 Ref      |
| MFI56580 | Unassigned | Unassigned | Unassigned | 843_0   | Clustered           | 20 VC_843_0  | 20  | 0.9621 | 1          | 0.9621 | 0 | 0 | 0 | 1 Ref      |
| MFI58036 | Unassigned | Unassigned | Unassigned | 560_0   | Clustered           | 15 VC_560_0  | 15  | 0.2846 | 1          | 0.2846 | 0 | 0 | 0 | 1 Ref      |
| MFI58037 | Unassigned | Unassigned | Unassigned | 560_0   | Clustered           | 15 VC_560_0  | 15  | 0.2846 | 1          | 0.2846 | 0 | 0 | 0 | 1 Ref      |
| MFI58038 | Unassigned | Unassigned | Unassigned | 475_0   | Clustered           | 96 VC_475_0  | 96  | 0.9303 | 1          | 0.9303 | 0 | 0 | 0 | 0.9575 Ref |
| MFI58039 | Unassigned | Unassigned | Unassigned | 469_0   | Clustered           | 18 VC_469_0  | 18  | 0.4583 | 1          | 0.4583 | 0 | 0 | 0 | 1 Ref      |
| MFI58040 | Unassigned | Unassigned | Unassigned | 341_0   | Clustered           | 27 VC_341_0  | 27  | 0.5058 | 1          | 0.5058 | 0 | 0 | 0 | 0.8661 Ref |
| MFI58041 | Unassigned | Unassigned | Unassigned | 341_0   | Clustered           | 27 VC_341_0  | 27  | 0.5058 | 1          | 0.5058 | 0 | 0 | 0 | 0.8661 Ref |
| MFI58042 | Unassigned | Unassigned | Unassigned | 469_0   | Clustered           | 18 VC_469_0  | 18  | 0.4583 | 1          | 0.4583 | 0 | 0 | 0 | 1 Ref      |
| MFI58043 | Unassigned | Unassigned | Unassigned | 341_0   | Clustered           | 27 VC_341_0  | 27  | 0.5058 | 1          | 0.5058 | 0 | 0 | 0 | 0.8661 Ref |
| MFI58044 | Unassigned | Unassigned | Unassigned | 341_0   | Clustered           | 27 VC_341_0  | 27  | 0.5058 | 1          | 0.5058 | 0 | 0 | 0 | 0.8661 Ref |
| MFI58045 | Unassigned | Unassigned | Unassigned | 290_64  | Clustered/Singleton | 1 VC_290_64  | 1   | 0      | 1          | 0      | 0 | 0 | 0 | 1 Ref      |
| MFI58046 | Unassigned | Unassigned | Unassigned | 290_189 | Clustered/Singleton | 1 VC_290_189 | 1   | 0      | 1          | 0      | 0 | 0 | 0 | 1 Ref      |
| MFI61328 | Unassigned | Unassigned | Unassigned | 258_0   | Clustered           | 121 VC_258_0 | 121 | 0.7359 | 1          | 0.7359 | 0 | 0 | 0 | 0.9999 Ref |
| MFI66859 | Unassigned | Unassigned | Unassigned | 433_0   | Clustered           | 5 VC_433_0   | 5   | 0.5226 | 0.99999998 | 0.5226 | 0 | 0 | 0 | 1 Ref      |
| MFI72979 | Unassigned | Unassigned | Unassigned | 649_1   | Clustered           | 14 VC_649_1  | 14  | 0.5226 | 1          | 0.5226 | 0 | 0 | 0 | 0.8352 Ref |
| MFI85717 | Unassigned | Unassigned | Unassigned | 245_0   | Clustered           | 17 VC_245_0  | 17  | 0.6081 | 1          | 0.6081 | 0 | 0 | 0 | 1 Ref      |
| MFI85718 | Unassigned | Unassigned | Unassigned | 1117_0  | Clustered           | 19 VC_1117_0 | 19  | 0.9177 | 1          | 0.9177 | 0 | 0 | 0 | 1 Ref      |
| MFI85719 | Unassigned | Unassigned | Unassigned | 245_0   | Clustered           | 17 VC_245_0  | 17  | 0.6081 | 1          | 0.6081 | 0 | 0 | 0 | 1 Ref      |
| MFI85720 | Unassigned | Unassigned | Unassigned | 245_0   | Clustered           | 17 VC_245_0  | 17  | 0.6081 | 1          | 0.6081 | 0 | 0 | 0 | 1 Ref      |
| MFI85721 | Unassigned | Unassigned | Unassigned | 1117_0  | Clustered           | 19 VC_1117_0 | 19  | 0.9177 | 1          | 0.9177 | 0 | 0 | 0 | 1 Ref      |
| MFI85722 | Unassigned | Unassigned | Unassigned | 244_0   | Clustered           | 4 VC_244_0   | 4   | 0.0426 | 0.99998759 | 0.0426 | 0 | 0 | 0 | 1 Ref      |
| MFI85723 | Unassigned | Unassigned | Unassigned | 1117_0  | Clustered           | 19 VC_1117_0 | 19  | 0.9177 | 1          | 0.9177 | 0 | 0 | 0 | 1 Ref      |
| MFI85724 | Unassigned | Unassigned | Unassigned | 1117_0  | Clustered           | 19 VC_1117_0 | 19  | 0.9177 | 1          | 0.9177 | 0 | 0 | 0 | 1 Ref      |
| MFI85725 | Unassigned | Unassigned | Unassigned | 1117_0  | Clustered           | 19 VC_1117_0 | 19  | 0.9177 | 1          | 0.9177 | 0 | 0 | 0 | 1 Ref      |
| MFI85727 | Unassigned | Unassigned | Unassigned | 223_0   | Clustered           | 4 VC_223_0   | 4   | 0.0478 | 0.9999878  | 0.0478 | 0 | 0 | 0 | 1 Ref      |
| MFI85728 | Unassigned | Unassigned | Unassigned | 917_0   | Clustered           | 28 VC_917_0  | 28  | 0.5465 | 1          | 0.5465 | 0 | 0 | 0 | 1 Ref      |
| MFI85729 | Unassigned | Unassigned | Unassigned | 532_0   | Clustered           | 75 VC_532_0  | 75  | 0.9393 | 1          | 0.9393 | 0 | 0 | 0 | 1 Ref      |
| MFI85730 | Unassigned | Unassigned | Unassigned | 917_0   | Clustered           | 28 VC_917_0  | 28  | 0.5465 | 1          | 0.5465 | 0 | 0 | 0 | 1 Ref      |
| MFI85731 | Unassigned | Unassigned | Unassigned | 882_0   | Clustered           | 11 VC_882_0  | 11  | 0.943  | 1          | 0.943  | 0 | 0 | 0 | 1 Ref      |
| MFI85732 | Unassigned | Unassigned | Unassigned | 532_0   | Clustered           | 75 VC_532_0  | 75  | 0.9393 | 1          | 0.9393 | 0 | 0 | 0 | 1 Ref      |
| MFI85733 | Unassigned | Unassigned | Unassigned | 532_0   | Clustered           | 75 VC_532_0  | 75  | 0.9393 | 1          | 0.9393 | 0 | 0 | 0 | 1 Ref      |
| MFI88997 | Unassigned | Unassigned | Unassigned | 30_1    | Clustered           | 53 VC_30_1   | 53  | 0.7151 | 1          | 0.7151 | 0 | 0 | 0 | 0.9325 Ref |
| MFI89170 | Unassigned | Unassigned | Unassigned | 825_0   | Clustered           | 17 VC_825_0  | 17  | 0.8364 | 1          | 0.8364 | 0 | 0 | 0 | 1 Ref      |
| MFI89171 | Unassigned | Unassigned | Unassigned | 825_0   | Clustered           | 17 VC_825_0  | 17  | 0.8364 | 1          | 0.8364 | 0 | 0 | 0 | 1 Ref      |
| MFI89172 | Unassigned | Unassigned | Unassigned | 825_0   | Clustered           | 17 VC_825_0  | 17  | 0.8364 | 1          | 0.8364 | 0 | 0 | 0 | 1 Ref      |
| MFI89173 | Unassigned | Unassigned | Unassigned | 825_0   | Clustered           | 17 VC_825_0  | 17  | 0.8364 | 1          | 0.8364 | 0 | 0 | 0 | 1 Ref      |
| MFI89174 | Unassigned | Unassigned | Unassigned | 825_0   | Clustered           | 17 VC_825_0  | 17  | 0.8364 | 1          | 0.8364 | 0 | 0 | 0 | 1 Ref      |
| MFI89175 | Unassigned | Unassigned | Unassigned | 825_0   | Clustered           | 17 VC_825_0  | 17  | 0.8364 | 1          | 0.8364 | 0 | 0 | 0 | 1 Ref      |
| MFI89176 | Unassigned | Unassigned | Unassigned | 1116_0  | Clustered           | 24 VC_1116_0 | 24  | 0.8376 | 1          | 0.8376 | 0 | 0 | 0 | 1 Ref      |
| MFI89177 | Unassigned | Unassigned | Unassigned | 1116_0  | Clustered           | 24 VC_1116_0 | 24  | 0.8376 | 1          | 0.8376 | 0 | 0 | 0 | 1 Ref      |
| MFI89178 | Unassigned | Unassigned | Unassigned | 1116_0  | Clustered           | 24 VC_1116_0 | 24  | 0.8376 | 1          | 0.8376 | 0 | 0 | 0 | 1 Ref      |
| MFI89179 | Unassigned | Unassigned | Unassigned | 991_0   | Clustered           | 39 VC_991_0  | 39  | 1      | 1          | 1      | 0 | 0 | 0 | 1 Ref      |
| MFI97383 | Unassigned | Unassigned | Unassigned | 1244_0  | Clustered           | 4 VC_1244_0  | 4   | 0.8666 | 0.9999992  | 0.8666 | 0 | 0 | 0 | 1 Ref      |
| MF276773 | Unassigned | Unassigned | Unassigned | 235_0   | Clustered           | 60 VC_235_0  | 60  | 0.9413 | 1          | 0.9413 | 0 | 0 | 0 | 1 Ref      |
| MF278336 | Unassigned | Unassigned | Unassigned | 1021_0  | Clustered           | 2 VC_1021_0  | 2   | 0.1576 | 0.95268934 | 0.1501 | 0 | 0 | 0 | 1 Ref      |
| MF281061 | Unassigned | Unassigned | Unassigned | 537_0   | Clustered           | 39 VC_537_0  | 39  | 0.8148 | 1          | 0.8148 | 0 | 0 | 0 | 1 Ref      |
| MF285615 | Unassigned | Unassigned | Unassigned | 848_0   | Clustered           | 124 VC_848_0 | 124 | 0.9484 | 1          | 0.9484 | 0 | 0 | 0 | 1 Ref      |
| MF285616 | Unassigned | Unassigned | Unassigned | 398_0   | Clustered           | 51 VC_398_0  | 51  | 0.8741 | 1          | 0.8741 | 0 | 0 | 0 | 1 Ref      |
| MF285617 | Unassigned | Unassigned | Unassigned | 398_0   | Clustered           | 51 VC_398_0  | 51  | 0.8741 | 1          | 0.8741 | 0 | 0 | 0 | 1 Ref      |
| MF285618 | Unassigned | Unassigned | Unassigned | 506_1   | Clustered           | 8 VC_506_1   | 8   | 0.2893 | 1          | 0.2893 | 0 | 0 | 0 | 1 Ref      |
| MF285619 | Unassigned | Unassigned | Unassigned | 134_1   | Clustered           | 4 VC_134_1   | 4   | 0.0354 | 0.99998777 | 0.0354 | 0 | 0 | 0 | 1 Ref      |
| MF285620 | Unassigned | Unassigned | Unassigned | 398_0   | Clustered           | 51 VC_398_0  | 51  | 0.8741 | 1          | 0.8741 | 0 | 0 | 0 | 1 Ref      |
| MF288917 | Unassigned | Unassigned | Unassigned | 913_0   | Clustered           | 28 VC_913_0  | 28  | 0.6206 | 1          | 0.6206 | 0 | 0 | 0 | 0.9841 Ref |
| MF288918 | Unassigned | Unassigned | Unassigned | 913_0   | Clustered           | 28 VC_913_0  | 28  | 0.6206 | 1          | 0.6206 | 0 | 0 | 0 | 0.9841 Ref |
| MF288919 | Unassigned | Unassigned | Unassigned | 913_0   | Clustered           | 28 VC_913_0  | 28  | 0.6206 | 1          | 0.6206 | 0 | 0 | 0 | 0.9841 Ref |
| MF288920 | Unassigned | Unassigned | Unassigned | 913_0   | Clustered           | 28 VC_913_0  | 28  | 0.6206 | 1          | 0.6206 | 0 | 0 | 0 | 0.9841 Ref |
| MF288921 | Unassigned | Unassigned | Unassigned | 912_0   | Clustered           | 10 VC_912_0  | 10  | 0.1994 | 1          | 0.1994 | 0 | 0 | 0 | 1 Ref      |
| MF288922 | Unassigned | Unassigned | Unassigned | 912_0   | Clustered           | 10 VC_912_0  | 10  | 0.1994 | 1          | 0.1994 | 0 | 0 | 0 | 1 Ref      |
| MF319184 | Unassigned | Unassigned | Unassigned | 785_2   | Clustered           | 7 VC_785_2   | 7   | 0.2595 | 1          | 0.2595 | 0 | 0 | 0 | 1 Ref      |
| MF324898 | Unassigned | Unassigned | Unassigned | 991_0   | Clustered           | 39 VC_991_0  | 39  | 1      | 1          | 1      | 0 | 0 | 0 | 1 Ref      |
| MF324899 | Unassigned | Unassigned | Unassigned | 223_0   | Clustered           | 4 VC_223_0   | 4   | 0.0478 | 0.9999878  | 0.0478 | 0 | 0 | 0 | 1 Ref      |
| MF324900 | Unassigned | Unassigned | Unassigned | 991_0   | Clustered           | 39 VC_991_0  | 39  | 1      | 1          | 1      | 0 | 0 | 0 | 1 Ref      |
| MF324901 | Unassigned | Unassigned | Unassigned | 991_0   | Clustered           | 39 VC_991_0  | 39  | 1      | 1          | 1      | 0 | 0 | 0 | 1 Ref      |
| MF324902 | Unassigned | Unassigned | Unassigned | 991_0   | Clustered           | 39 VC_991_0  | 39  | 1      | 1          | 1      | 0 | 0 | 0 | 1 Ref      |
| MF324903 | Unassigned | Unassigned | Unassigned | 991_0   | Clustered           | 39 VC_991_0  | 39  | 1      | 1          | 1      | 0 | 0 | 0 | 1 Ref      |
| MF324904 | Unassigned | Unassigned | Unassigned | 991_0   | Clustered           | 39 VC_991_0  | 39  | 1      | 1          | 1      | 0 | 0 | 0 | 1 Ref      |
| MF324905 | Unassigned | Unassigned | Unassigned | 991_0   | Clustered           | 39 VC_991_0  | 39  | 1      | 1          | 1      | 0 | 0 | 0 | 1 Ref      |



|          |            |            |            |         |                     |              |     |        |            |        |   |   |   |            |
|----------|------------|------------|------------|---------|---------------------|--------------|-----|--------|------------|--------|---|---|---|------------|
| MF324906 | Unassigned | Unassigned | Unassigned | 825_0   | Clustered           | 17 VC_825_0  | 17  | 0.8364 | 1          | 0.8364 | 0 | 0 | 0 | 1 Ref      |
| MF324907 | Unassigned | Unassigned | Unassigned | 1116_0  | Clustered           | 24 VC_1116_0 | 24  | 0.8376 | 1          | 0.8376 | 0 | 0 | 0 | 1 Ref      |
| MF324908 | Unassigned | Unassigned | Unassigned | 244_2   | Clustered           | 11 VC_244_2  | 11  | 0.1403 | 1          | 0.1403 | 0 | 0 | 0 | 0.9818 Ref |
| MF324909 | Unassigned | Unassigned | Unassigned | 244_2   | Clustered           | 11 VC_244_2  | 11  | 0.1403 | 1          | 0.1403 | 0 | 0 | 0 | 0.9818 Ref |
| MF324910 | Unassigned | Unassigned | Unassigned | 917_0   | Clustered           | 28 VC_917_0  | 28  | 0.5465 | 1          | 0.5465 | 0 | 0 | 0 | 1 Ref      |
| MF324911 | Unassigned | Unassigned | Unassigned | 244_2   | Clustered           | 11 VC_244_2  | 11  | 0.1403 | 1          | 0.1403 | 0 | 0 | 0 | 0.9818 Ref |
| MF324912 | Unassigned | Unassigned | Unassigned | 244_2   | Clustered           | 11 VC_244_2  | 11  | 0.1403 | 1          | 0.1403 | 0 | 0 | 0 | 0.9818 Ref |
| MF324913 | Unassigned | Unassigned | Unassigned | 244_2   | Clustered           | 11 VC_244_2  | 11  | 0.1403 | 1          | 0.1403 | 0 | 0 | 0 | 0.9818 Ref |
| MF324914 | Unassigned | Unassigned | Unassigned | 244_2   | Clustered           | 11 VC_244_2  | 11  | 0.1403 | 1          | 0.1403 | 0 | 0 | 0 | 0.9818 Ref |
| MF324915 | Unassigned | Unassigned | Unassigned | 244_1   | Clustered           | 13 VC_244_1  | 13  | 0.1766 | 1          | 0.1766 | 0 | 0 | 0 | 0.7308 Ref |
| MF327003 | Unassigned | Unassigned | Unassigned | 341_0   | Clustered           | 27 VC_341_0  | 27  | 0.5058 | 1          | 0.5058 | 0 | 0 | 0 | 0.8661 Ref |
| MF327004 | Unassigned | Unassigned | Unassigned | 341_0   | Clustered           | 27 VC_341_0  | 27  | 0.5058 | 1          | 0.5058 | 0 | 0 | 0 | 0.8661 Ref |
| MF327005 | Unassigned | Unassigned | Unassigned | 341_0   | Clustered           | 27 VC_341_0  | 27  | 0.5058 | 1          | 0.5058 | 0 | 0 | 0 | 0.8661 Ref |
| MF327006 | Unassigned | Unassigned | Unassigned | 609_0   | Clustered           | 27 VC_609_0  | 27  | 0.9943 | 1          | 0.9943 | 0 | 0 | 0 | 1 Ref      |
| MF327007 | Unassigned | Unassigned | Unassigned | 290_158 | Clustered/Singleton | 1 VC_290_158 | 1   | 0      | 1          | 0      | 0 | 0 | 0 | 1 Ref      |
| MF327008 | Unassigned | Unassigned | Unassigned | 290_19  | Clustered/Singleton | 1 VC_290_19  | 1   | 0      | 1          | 0      | 0 | 0 | 0 | 1 Ref      |
| MF327009 | Unassigned | Unassigned | Unassigned | 290_20  | Clustered/Singleton | 1 VC_290_20  | 1   | 0      | 1          | 0      | 0 | 0 | 0 | 1 Ref      |
| MF346584 | Unassigned | Unassigned | Unassigned | 713_0   | Clustered           | 26 VC_713_0  | 26  | 0.9358 | 1          | 0.9358 | 0 | 0 | 0 | 1 Ref      |
| MF346933 | Unassigned | Unassigned | Unassigned | 210_0   | Clustered           | 105 VC_210_0 | 105 | 0.4076 | 1          | 0.4076 | 0 | 0 | 0 | 0.7766 Ref |
| MF347636 | Unassigned | Unassigned | Unassigned | 1114_3  | Clustered           | 16 VC_1114_3 | 16  | 0.2336 | 1          | 0.2336 | 0 | 0 | 0 | 0.9667 Ref |
| MF347637 | Unassigned | Unassigned | Unassigned | 1114_3  | Clustered           | 16 VC_1114_3 | 16  | 0.2336 | 1          | 0.2336 | 0 | 0 | 0 | 0.9667 Ref |
| MF347638 | Unassigned | Unassigned | Unassigned | 1114_3  | Clustered           | 16 VC_1114_3 | 16  | 0.2336 | 1          | 0.2336 | 0 | 0 | 0 | 0.9667 Ref |
| MF347639 | Unassigned | Unassigned | Unassigned | 1114_3  | Clustered           | 16 VC_1114_3 | 16  | 0.2336 | 1          | 0.2336 | 0 | 0 | 0 | 0.9667 Ref |
| MF351863 | Unassigned | Unassigned | Unassigned | 446_3   | Clustered/Singleton | 1 VC_446_3   | 1   | 0      | 1          | 0      | 0 | 0 | 0 | 1 Ref      |
| MF356679 | Unassigned | Unassigned | Unassigned | 254_1   | Clustered/Singleton | 1 VC_254_1   | 1   | 0      | 1          | 0      | 0 | 0 | 0 | 1 Ref      |
| MF358541 | Unassigned | Unassigned | Unassigned | 1114_3  | Clustered           | 16 VC_1114_3 | 16  | 0.2336 | 1          | 0.2336 | 0 | 0 | 0 | 0.9667 Ref |
| MF358542 | Unassigned | Unassigned | Unassigned | 1114_3  | Clustered           | 16 VC_1114_3 | 16  | 0.2336 | 1          | 0.2336 | 0 | 0 | 0 | 0.9667 Ref |
| MF360957 | Unassigned | Unassigned | Unassigned | 462_0   | Clustered           | 4 VC_462_0   | 4   | 0.3031 | 0.99978853 | 0.303  | 0 | 0 | 0 | 1 Ref      |
| MF370225 | Unassigned | Unassigned | Unassigned | 340_1   | Clustered           | 17 VC_340_1  | 17  | 0.0863 | 1          | 0.0863 | 0 | 0 | 0 | 0.8235 Ref |
| MF370964 | Unassigned | Unassigned | Unassigned | 514_1   | Clustered/Singleton | 1 VC_514_1   | 1   | 0      | 1          | 0      | 0 | 0 | 0 | 1 Ref      |
| MF370965 | Unassigned | Unassigned | Unassigned | 927_0   | Clustered           | 5 VC_927_0   | 5   | 0.4988 | 0.99999981 | 0.4988 | 0 | 0 | 0 | 1 Ref      |
| MF373840 | Unassigned | Unassigned | Unassigned | 531_0   | Clustered           | 32 VC_531_0  | 32  | 0.6859 | 1          | 0.6859 | 0 | 0 | 0 | 1 Ref      |
| MF373841 | Unassigned | Unassigned | Unassigned | 244_1   | Clustered           | 13 VC_244_1  | 13  | 0.1766 | 1          | 0.1766 | 0 | 0 | 0 | 0.7308 Ref |
| MF373842 | Unassigned | Unassigned | Unassigned | 991_0   | Clustered           | 39 VC_991_0  | 39  | 1      | 1          | 1      | 0 | 0 | 0 | 1 Ref      |
| MF373843 | Unassigned | Unassigned | Unassigned | 537_0   | Clustered           | 39 VC_537_0  | 39  | 0.8148 | 1          | 0.8148 | 0 | 0 | 0 | 1 Ref      |
| MF374379 | Unassigned | Unassigned | Unassigned | 45_0    | Clustered           | 38 VC_45_0   | 38  | 0.5785 | 1          | 0.5785 | 0 | 0 | 0 | 0.9659 Ref |
| MF375456 | Unassigned | Unassigned | Unassigned | 75_0    | Clustered           | 15 VC_75_0   | 15  | 0.518  | 1          | 0.518  | 0 | 0 | 0 | 1 Ref      |
| MF377440 | Unassigned | Unassigned | Unassigned | 243_0   | Clustered           | 72 VC_243_0  | 72  | 0.8089 | 1          | 0.8089 | 0 | 0 | 0 | 1 Ref      |
| MF377441 | Unassigned | Unassigned | Unassigned | 1116_0  | Clustered           | 24 VC_1116_0 | 24  | 0.8376 | 1          | 0.8376 | 0 | 0 | 0 | 1 Ref      |
| MF377442 | Unassigned | Unassigned | Unassigned | 1116_0  | Clustered           | 24 VC_1116_0 | 24  | 0.8376 | 1          | 0.8376 | 0 | 0 | 0 | 1 Ref      |
| MF398190 | Unassigned | Unassigned | Unassigned | 155_8   | Clustered           | 66 VC_155_8  | 66  | 0.4537 | 1          | 0.4537 | 0 | 0 | 0 | 0.8182 Ref |
| MF402939 | Unassigned | Unassigned | Unassigned | 198_18  | Clustered/Singleton | 1 VC_198_18  | 1   | 0      | 1          | 0      | 0 | 0 | 0 | 1 Ref      |
| MF403005 | Unassigned | Unassigned | Unassigned | 1020_0  | Clustered           | 22 VC_1020_0 | 22  | 0.895  | 1          | 0.895  | 0 | 0 | 0 | 1 Ref      |
| MF403006 | Unassigned | Unassigned | Unassigned | 1020_0  | Clustered           | 22 VC_1020_0 | 22  | 0.895  | 1          | 0.895  | 0 | 0 | 0 | 1 Ref      |
| MF403007 | Unassigned | Unassigned | Unassigned | 1093_2  | Clustered/Singleton | 1 VC_1093_2  | 1   | 0      | 1          | 0      | 0 | 0 | 0 | 1 Ref      |
| MF405094 | Unassigned | Unassigned | Unassigned | 155_8   | Clustered           | 66 VC_155_8  | 66  | 0.4537 | 1          | 0.4537 | 0 | 0 | 0 | 0.8182 Ref |
| MF407276 | Unassigned | Unassigned | Unassigned | 842_0   | Clustered           | 14 VC_842_0  | 14  | 0.6581 | 1          | 0.6581 | 0 | 0 | 0 | 1 Ref      |
| MF415412 | Unassigned | Unassigned | Unassigned | 972_0   | Clustered           | 99 VC_972_0  | 99  | 0.9113 | 1          | 0.9113 | 0 | 0 | 0 | 0.9928 Ref |
| MF418016 | Unassigned | Unassigned | Unassigned | 90_1    | Clustered/Singleton | 1 VC_90_1    | 1   | 0      | 1          | 0      | 0 | 0 | 0 | 1 Ref      |
| MF422185 | Unassigned | Unassigned | Unassigned | 87_3    | Clustered           | 19 VC_87_3   | 19  | 0.3645 | 1          | 0.3645 | 0 | 0 | 0 | 0.807 Ref  |
| MF428478 | Unassigned | Unassigned | Unassigned | 11_0    | Clustered           | 19 VC_11_0   | 19  | 0.7544 | 1          | 0.7544 | 0 | 0 | 0 | 1 Ref      |
| MF428479 | Unassigned | Unassigned | Unassigned | 11_0    | Clustered           | 19 VC_11_0   | 19  | 0.7544 | 1          | 0.7544 | 0 | 0 | 0 | 1 Ref      |
| MF428480 | Unassigned | Unassigned | Unassigned | 11_0    | Clustered           | 19 VC_11_0   | 19  | 0.7544 | 1          | 0.7544 | 0 | 0 | 0 | 1 Ref      |
| MF428481 | Unassigned | Unassigned | Unassigned | 11_0    | Clustered           | 19 VC_11_0   | 19  | 0.7544 | 1          | 0.7544 | 0 | 0 | 0 | 1 Ref      |
| MF431252 | Unassigned | Unassigned | Unassigned | 654_0   | Clustered           | 115 VC_654_0 | 115 | 0.7303 | 1          | 0.7303 | 0 | 0 | 0 | 0.8764 Ref |
| MF431615 | Unassigned | Unassigned | Unassigned | 311_0   | Clustered           | 11 VC_311_0  | 11  | 0.7851 | 1          | 0.7851 | 0 | 0 | 0 | 1 Ref      |
| MF431616 | Unassigned | Unassigned | Unassigned | 311_0   | Clustered           | 11 VC_311_0  | 11  | 0.7851 | 1          | 0.7851 | 0 | 0 | 0 | 1 Ref      |
| MF431617 | Unassigned | Unassigned | Unassigned | 311_0   | Clustered           | 11 VC_311_0  | 11  | 0.7851 | 1          | 0.7851 | 0 | 0 | 0 | 1 Ref      |
| MF431726 | Unassigned | Unassigned | Unassigned | 548_0   | Clustered           | 9 VC_548_0   | 9   | 0.8018 | 1          | 0.8018 | 0 | 0 | 0 | 1 Ref      |
| MF431730 | Unassigned | Unassigned | Unassigned | 198_7   | Clustered           | 7 VC_198_7   | 7   | 0.047  | 1          | 0.047  | 0 | 0 | 0 | 1 Ref      |
| MF431731 | Unassigned | Unassigned | Unassigned | 198_7   | Clustered           | 7 VC_198_7   | 7   | 0.047  | 1          | 0.047  | 0 | 0 | 0 | 1 Ref      |
| MF431732 | Unassigned | Unassigned | Unassigned | 198_7   | Clustered           | 7 VC_198_7   | 7   | 0.047  | 1          | 0.047  | 0 | 0 | 0 | 1 Ref      |
| MF431733 | Unassigned | Unassigned | Unassigned | 198_7   | Clustered           | 7 VC_198_7   | 7   | 0.047  | 1          | 0.047  | 0 | 0 | 0 | 1 Ref      |
| MF431734 | Unassigned | Unassigned | Unassigned | 198_7   | Clustered           | 7 VC_198_7   | 7   | 0.047  | 1          | 0.047  | 0 | 0 | 0 | 1 Ref      |
| MF431735 | Unassigned | Unassigned | Unassigned | 198_7   | Clustered           | 7 VC_198_7   | 7   | 0.047  | 1          | 0.047  | 0 | 0 | 0 | 1 Ref      |
| MF431736 | Unassigned | Unassigned | Unassigned | 199_32  | Clustered           | 12 VC_199_32 | 12  | 0.0676 | 1          | 0.0676 | 0 | 0 | 0 | 0.7576 Ref |
| MF431737 | Unassigned | Unassigned | Unassigned | 199_32  | Clustered           | 12 VC_199_32 | 12  | 0.0676 | 1          | 0.0676 | 0 | 0 | 0 | 0.7576 Ref |
| MF431738 | Unassigned | Unassigned | Unassigned | 199_32  | Clustered           | 12 VC_199_32 | 12  | 0.0676 | 1          | 0.0676 | 0 | 0 | 0 | 0.7576 Ref |
| MF431739 | Unassigned | Unassigned | Unassigned | 199_32  | Clustered           | 12 VC_199_32 | 12  | 0.0676 | 1          | 0.0676 | 0 | 0 | 0 | 0.7576 Ref |
| MF431740 | Unassigned | Unassigned | Unassigned | 199_32  | Clustered           | 12 VC_199_32 | 12  | 0.0676 | 1          | 0.0676 | 0 | 0 | 0 | 0.7576 Ref |
| MF431741 | Unassigned | Unassigned | Unassigned | 199_32  | Clustered           | 12 VC_199_32 | 12  | 0.0676 | 1          | 0.0676 | 0 | 0 | 0 | 0.7576 Ref |
| MF443119 | Unassigned | Unassigned | Unassigned | 706_0   | Clustered           | 52 VC_706_0  | 52  | 0.9787 | 1          | 0.9787 | 0 | 0 | 0 | 1 Ref      |
| MF443120 | Unassigned | Unassigned | Unassigned | 706_0   | Clustered           | 52 VC_706_0  | 52  | 0.9787 | 1          | 0.9787 | 0 | 0 | 0 | 1 Ref      |
| MF443121 | Unassigned | Unassigned | Unassigned | 706_0   | Clustered           | 52 VC_706_0  | 52  | 0.9787 | 1          | 0.9787 | 0 | 0 | 0 | 1 Ref      |
| MF443122 | Unassigned | Unassigned | Unassigned | 706_0   | Clustered           | 52 VC_706_0  | 52  | 0.9787 | 1          | 0.9787 | 0 | 0 | 0 | 1 Ref      |
| MF443123 | Unassigned | Unassigned | Unassigned | 706_0   | Clustered           | 52 VC_706_0  | 52  | 0.9787 | 1          | 0.9787 | 0 | 0 | 0 | 1 Ref      |
| MF443124 | Unassigned | Unassigned | Unassigned | 706_0   | Clustered           | 52 VC_706_0  | 52  | 0.9787 | 1          | 0.9787 | 0 | 0 | 0 | 1 Ref      |
| MF443125 | Unassigned | Unassigned | Unassigned | 706_0   | Clustered           | 52 VC_706_0  | 52  | 0.9787 | 1          | 0.9787 | 0 | 0 | 0 | 1 Ref      |
| MF443126 | Unassigned | Unassigned | Unassigned | 706_0   | Clustered           | 52 VC_706_0  | 52  | 0.9787 | 1          | 0.9787 | 0 | 0 | 0 | 1 Ref      |
| MF443783 | Unassigned | Unassigned | Unassigned | 1269_0  | Clustered           | 2 VC_1269_0  | 2   | 1      | 1          | 1      | 0 | 0 | 0 | 1 Ref      |
| MF443784 | Unassigned | Unassigned | Unassigned | 1269_0  | Clustered           | 2 VC_1269_0  | 2   | 1      | 1          | 1      | 0 | 0 | 0 | 1 Ref      |



|          |            |            |            |        |           |              |     |        |            |        |   |   |   |        |     |
|----------|------------|------------|------------|--------|-----------|--------------|-----|--------|------------|--------|---|---|---|--------|-----|
| MF448340 | Unassigned | Unassigned | Unassigned | 457_4  | Clustered | 10 VC_457_4  | 10  | 0.3316 | 1          | 0.3316 | 0 | 0 | 0 | 0.9333 | Ref |
| MF448554 | Unassigned | Unassigned | Unassigned | 210_0  | Clustered | 105 VC_210_0 | 105 | 0.4076 | 1          | 0.4076 | 0 | 0 | 0 | 0.7766 | Ref |
| MF448555 | Unassigned | Unassigned | Unassigned | 210_0  | Clustered | 105 VC_210_0 | 105 | 0.4076 | 1          | 0.4076 | 0 | 0 | 0 | 0.7766 | Ref |
| MF448556 | Unassigned | Unassigned | Unassigned | 210_0  | Clustered | 105 VC_210_0 | 105 | 0.4076 | 1          | 0.4076 | 0 | 0 | 0 | 0.7766 | Ref |
| MF448557 | Unassigned | Unassigned | Unassigned | 210_0  | Clustered | 105 VC_210_0 | 105 | 0.4076 | 1          | 0.4076 | 0 | 0 | 0 | 0.7766 | Ref |
| MF448558 | Unassigned | Unassigned | Unassigned | 210_0  | Clustered | 105 VC_210_0 | 105 | 0.4076 | 1          | 0.4076 | 0 | 0 | 0 | 0.7766 | Ref |
| MF448559 | Unassigned | Unassigned | Unassigned | 210_0  | Clustered | 105 VC_210_0 | 105 | 0.4076 | 1          | 0.4076 | 0 | 0 | 0 | 0.7766 | Ref |
| MF448560 | Unassigned | Unassigned | Unassigned | 210_0  | Clustered | 105 VC_210_0 | 105 | 0.4076 | 1          | 0.4076 | 0 | 0 | 0 | 0.7766 | Ref |
| MF448561 | Unassigned | Unassigned | Unassigned | 210_0  | Clustered | 105 VC_210_0 | 105 | 0.4076 | 1          | 0.4076 | 0 | 0 | 0 | 0.7766 | Ref |
| MF448562 | Unassigned | Unassigned | Unassigned | 210_0  | Clustered | 105 VC_210_0 | 105 | 0.4076 | 1          | 0.4076 | 0 | 0 | 0 | 0.7766 | Ref |
| MF448563 | Unassigned | Unassigned | Unassigned | 210_0  | Clustered | 105 VC_210_0 | 105 | 0.4076 | 1          | 0.4076 | 0 | 0 | 0 | 0.7766 | Ref |
| MF448564 | Unassigned | Unassigned | Unassigned | 210_0  | Clustered | 105 VC_210_0 | 105 | 0.4076 | 1          | 0.4076 | 0 | 0 | 0 | 0.7766 | Ref |
| MF448565 | Unassigned | Unassigned | Unassigned | 210_0  | Clustered | 105 VC_210_0 | 105 | 0.4076 | 1          | 0.4076 | 0 | 0 | 0 | 0.7766 | Ref |
| MF448566 | Unassigned | Unassigned | Unassigned | 210_0  | Clustered | 105 VC_210_0 | 105 | 0.4076 | 1          | 0.4076 | 0 | 0 | 0 | 0.7766 | Ref |
| MF448567 | Unassigned | Unassigned | Unassigned | 210_0  | Clustered | 105 VC_210_0 | 105 | 0.4076 | 1          | 0.4076 | 0 | 0 | 0 | 0.7766 | Ref |
| MF448568 | Unassigned | Unassigned | Unassigned | 210_0  | Clustered | 105 VC_210_0 | 105 | 0.4076 | 1          | 0.4076 | 0 | 0 | 0 | 0.7766 | Ref |
| MF448569 | Unassigned | Unassigned | Unassigned | 210_0  | Clustered | 105 VC_210_0 | 105 | 0.4076 | 1          | 0.4076 | 0 | 0 | 0 | 0.7766 | Ref |
| MF448570 | Unassigned | Unassigned | Unassigned | 210_0  | Clustered | 105 VC_210_0 | 105 | 0.4076 | 1          | 0.4076 | 0 | 0 | 0 | 0.7766 | Ref |
| MF448571 | Unassigned | Unassigned | Unassigned | 210_0  | Clustered | 105 VC_210_0 | 105 | 0.4076 | 1          | 0.4076 | 0 | 0 | 0 | 0.7766 | Ref |
| MF448572 | Unassigned | Unassigned | Unassigned | 210_0  | Clustered | 105 VC_210_0 | 105 | 0.4076 | 1          | 0.4076 | 0 | 0 | 0 | 0.7766 | Ref |
| MF467948 | Unassigned | Unassigned | Unassigned | 901_0  | Clustered | 31 VC_901_0  | 31  | 0.8235 | 1          | 0.8235 | 0 | 0 | 0 | 0.8194 | Ref |
| MF467949 | Unassigned | Unassigned | Unassigned | 901_0  | Clustered | 31 VC_901_0  | 31  | 0.8235 | 1          | 0.8235 | 0 | 0 | 0 | 0.8194 | Ref |
| MF468274 | Unassigned | Unassigned | Unassigned | 595_0  | Clustered | 35 VC_595_0  | 35  | 0.8809 | 1          | 0.8809 | 0 | 0 | 0 | 1      | Ref |
| MF472892 | Unassigned | Unassigned | Unassigned | 243_0  | Clustered | 72 VC_243_0  | 72  | 0.8089 | 1          | 0.8089 | 0 | 0 | 0 | 1      | Ref |
| MF472894 | Unassigned | Unassigned | Unassigned | 537_0  | Clustered | 39 VC_537_0  | 39  | 0.8148 | 1          | 0.8148 | 0 | 0 | 0 | 1      | Ref |
| MF472896 | Unassigned | Unassigned | Unassigned | 223_6  | Clustered | 42 VC_223_6  | 42  | 0.4717 | 1          | 0.4717 | 0 | 0 | 0 | 0.8351 | Ref |
| MF476925 | Unassigned | Unassigned | Unassigned | 614_0  | Clustered | 4 VC_614_0   | 4   | 0.0588 | 0.99274182 | 0.0584 | 0 | 0 | 0 | 1      | Ref |
| MF479730 | Unassigned | Unassigned | Unassigned | 619_2  | Clustered | 10 VC_619_2  | 10  | 0.3034 | 1          | 0.3034 | 0 | 0 | 0 | 1      | Ref |
| MF481197 | Unassigned | Unassigned | Unassigned | 1067_0 | Clustered | 20 VC_1067_0 | 20  | 0.7109 | 1          | 0.7109 | 0 | 0 | 0 | 1      | Ref |
| MF490236 | Unassigned | Unassigned | Unassigned | 862_0  | Clustered | 29 VC_862_0  | 29  | 0.8594 | 1          | 0.8594 | 0 | 0 | 0 | 1      | Ref |
| MF490237 | Unassigned | Unassigned | Unassigned | 645_0  | Clustered | 20 VC_645_0  | 20  | 0.8502 | 1          | 0.8502 | 0 | 0 | 0 | 1      | Ref |
| MF490238 | Unassigned | Unassigned | Unassigned | 862_0  | Clustered | 29 VC_862_0  | 29  | 0.8594 | 1          | 0.8594 | 0 | 0 | 0 | 1      | Ref |
| MF490239 | Unassigned | Unassigned | Unassigned | 172_0  | Clustered | 26 VC_172_0  | 26  | 0.7909 | 1          | 0.7909 | 0 | 0 | 0 | 1      | Ref |
| MF490240 | Unassigned | Unassigned | Unassigned | 80_0   | Clustered | 64 VC_80_0   | 64  | 0.418  | 1          | 0.418  | 0 | 0 | 0 | 0.7649 | Ref |
| MF490241 | Unassigned | Unassigned | Unassigned | 80_7   | Clustered | 33 VC_80_7   | 33  | 0.2156 | 1          | 0.2156 | 0 | 0 | 0 | 0.8409 | Ref |
| MF498773 | Unassigned | Unassigned | Unassigned | 457_4  | Clustered | 10 VC_457_4  | 10  | 0.3316 | 1          | 0.3316 | 0 | 0 | 0 | 0.9333 | Ref |
| MF498775 | Unassigned | Unassigned | Unassigned | 457_4  | Clustered | 10 VC_457_4  | 10  | 0.3316 | 1          | 0.3316 | 0 | 0 | 0 | 0.9333 | Ref |
| MF498901 | Unassigned | Unassigned | Unassigned | 912_0  | Clustered | 10 VC_912_0  | 10  | 0.1994 | 1          | 0.1994 | 0 | 0 | 0 | 1      | Ref |
| MF537628 | Unassigned | Unassigned | Unassigned | 991_0  | Clustered | 39 VC_991_0  | 39  | 1      | 1          | 1      | 0 | 0 | 0 | 1      | Ref |
| MF541403 | Unassigned | Unassigned | Unassigned | 1016_0 | Clustered | 62 VC_1016_0 | 62  | 0.8638 | 1          | 0.8638 | 0 | 0 | 0 | 0.743  | Ref |
| MF541404 | Unassigned | Unassigned | Unassigned | 1016_0 | Clustered | 62 VC_1016_0 | 62  | 0.8638 | 1          | 0.8638 | 0 | 0 | 0 | 0.743  | Ref |
| MF541405 | Unassigned | Unassigned | Unassigned | 1016_0 | Clustered | 62 VC_1016_0 | 62  | 0.8638 | 1          | 0.8638 | 0 | 0 | 0 | 0.743  | Ref |
| MF541406 | Unassigned | Unassigned | Unassigned | 1016_0 | Clustered | 62 VC_1016_0 | 62  | 0.8638 | 1          | 0.8638 | 0 | 0 | 0 | 0.743  | Ref |
| MF541407 | Unassigned | Unassigned | Unassigned | 1016_0 | Clustered | 62 VC_1016_0 | 62  | 0.8638 | 1          | 0.8638 | 0 | 0 | 0 | 0.743  | Ref |
| MF541408 | Unassigned | Unassigned | Unassigned | 1016_0 | Clustered | 62 VC_1016_0 | 62  | 0.8638 | 1          | 0.8638 | 0 | 0 | 0 | 0.743  | Ref |
| MF541409 | Unassigned | Unassigned | Unassigned | 1016_0 | Clustered | 62 VC_1016_0 | 62  | 0.8638 | 1          | 0.8638 | 0 | 0 | 0 | 0.743  | Ref |
| MF541410 | Unassigned | Unassigned | Unassigned | 1016_0 | Clustered | 62 VC_1016_0 | 62  | 0.8638 | 1          | 0.8638 | 0 | 0 | 0 | 0.743  | Ref |
| MF547662 | Unassigned | Unassigned | Unassigned | 487_3  | Clustered | 2 VC_487_3   | 2   | 0.1071 | 0.94066235 | 0.1008 | 0 | 0 | 0 | 1      | Ref |
| MF547663 | Unassigned | Unassigned | Unassigned | 487_3  | Clustered | 2 VC_487_3   | 2   | 0.1071 | 0.94066235 | 0.1008 | 0 | 0 | 0 | 1      | Ref |
| MF564201 | Unassigned | Unassigned | Unassigned | 976_0  | Clustered | 36 VC_976_0  | 36  | 0.7833 | 1          | 0.7833 | 0 | 0 | 0 | 1      | Ref |
| MF574151 | Unassigned | Unassigned | Unassigned | 83_0   | Clustered | 24 VC_83_0   | 24  | 0.7345 | 1          | 0.7345 | 0 | 0 | 0 | 1      | Ref |
| MF580410 | Unassigned | Unassigned | Unassigned | 8_0    | Clustered | 58 VC_8_0    | 58  | 0.8285 | 1          | 0.8285 | 0 | 0 | 0 | 0.9946 | Ref |
| MF580759 | Unassigned | Unassigned | Unassigned | 258_0  | Clustered | 121 VC_258_0 | 121 | 0.7359 | 1          | 0.7359 | 0 | 0 | 0 | 0.9999 | Ref |
| MF580760 | Unassigned | Unassigned | Unassigned | 258_0  | Clustered | 121 VC_258_0 | 121 | 0.7359 | 1          | 0.7359 | 0 | 0 | 0 | 0.9999 | Ref |
| MF580761 | Unassigned | Unassigned | Unassigned | 258_0  | Clustered | 121 VC_258_0 | 121 | 0.7359 | 1          | 0.7359 | 0 | 0 | 0 | 0.9999 | Ref |
| MF580762 | Unassigned | Unassigned | Unassigned | 258_0  | Clustered | 121 VC_258_0 | 121 | 0.7359 | 1          | 0.7359 | 0 | 0 | 0 | 0.9999 | Ref |
| MF580763 | Unassigned | Unassigned | Unassigned | 258_0  | Clustered | 121 VC_258_0 | 121 | 0.7359 | 1          | 0.7359 | 0 | 0 | 0 | 0.9999 | Ref |
| MF580764 | Unassigned | Unassigned | Unassigned | 258_0  | Clustered | 121 VC_258_0 | 121 | 0.7359 | 1          | 0.7359 | 0 | 0 | 0 | 0.9999 | Ref |
| MF580765 | Unassigned | Unassigned | Unassigned | 258_0  | Clustered | 121 VC_258_0 | 121 | 0.7359 | 1          | 0.7359 | 0 | 0 | 0 | 0.9999 | Ref |
| MF580766 | Unassigned | Unassigned | Unassigned | 258_0  | Clustered | 121 VC_258_0 | 121 | 0.7359 | 1          | 0.7359 | 0 | 0 | 0 | 0.9999 | Ref |
| MF580767 | Unassigned | Unassigned | Unassigned | 258_0  | Clustered | 121 VC_258_0 | 121 | 0.7359 | 1          | 0.7359 | 0 | 0 | 0 | 0.9999 | Ref |
| MF580768 | Unassigned | Unassigned | Unassigned | 258_0  | Clustered | 121 VC_258_0 | 121 | 0.7359 | 1          | 0.7359 | 0 | 0 | 0 | 0.9999 | Ref |
| MF580769 | Unassigned | Unassigned | Unassigned | 258_0  | Clustered | 121 VC_258_0 | 121 | 0.7359 | 1          | 0.7359 | 0 | 0 | 0 | 0.9999 | Ref |
| MF580770 | Unassigned | Unassigned | Unassigned | 258_0  | Clustered | 121 VC_258_0 | 121 | 0.7359 | 1          | 0.7359 | 0 | 0 | 0 | 0.9999 | Ref |
| MF580771 | Unassigned | Unassigned | Unassigned | 258_0  | Clustered | 121 VC_258_0 | 121 | 0.7359 | 1          | 0.7359 | 0 | 0 | 0 | 0.9999 | Ref |
| MF580772 | Unassigned | Unassigned | Unassigned | 258_0  | Clustered | 121 VC_258_0 | 121 | 0.7359 | 1          | 0.7359 | 0 | 0 | 0 | 0.9999 | Ref |
| MF580773 | Unassigned | Unassigned | Unassigned | 258_0  | Clustered | 121 VC_258_0 | 121 | 0.7359 | 1          | 0.7359 | 0 | 0 | 0 | 0.9999 | Ref |
| MF580774 | Unassigned | Unassigned | Unassigned | 258_0  | Clustered | 121 VC_258_0 | 121 | 0.7359 | 1          | 0.7359 | 0 | 0 | 0 | 0.9999 | Ref |
| MF580775 | Unassigned | Unassigned | Unassigned | 258_0  | Clustered | 121 VC_258_0 | 121 | 0.7359 | 1          | 0.7359 | 0 | 0 | 0 | 0.9999 | Ref |
| MF580955 | Unassigned | Unassigned | Unassigned | 1271_0 | Clustered | 3 VC_1271_0  | 3   | 1      | 1          | 1      | 0 | 0 | 0 | 1      | Ref |
| MF580956 | Unassigned | Unassigned | Unassigned | 1272_0 | Clustered | 3 VC_1272_0  | 3   | 0.8121 | 0.99225442 | 0.8058 | 0 | 0 | 0 | 1      | Ref |
| MF580957 | Unassigned | Unassigned | Unassigned | 1271_0 | Clustered | 3 VC_1271_0  | 3   | 1      | 1          | 1      | 0 | 0 | 0 | 1      | Ref |
| MF580958 | Unassigned | Unassigned | Unassigned | 1271_0 | Clustered | 3 VC_1271_0  | 3   | 1      | 1          | 1      | 0 | 0 | 0 | 1      | Ref |
| MF580959 | Unassigned | Unassigned | Unassigned | 1272_0 | Clustered | 3 VC_1272_0  | 3   | 0.8121 | 0.99225442 | 0.8058 | 0 | 0 | 0 | 1      | Ref |
| MF580960 | Unassigned | Unassigned | Unassigned | 1272_0 | Clustered | 3 VC_1272_0  | 3   | 0.8121 | 0.99225442 | 0.8058 | 0 | 0 | 0 | 1      | Ref |
| MF580961 | Unassigned | Unassigned | Unassigned | 1273_0 | Clustered | 3 VC_1273_0  | 3   | 0.7979 | 0.99216275 | 0.7916 | 0 | 0 | 0 | 1      | Ref |
| MF580962 | Unassigned | Unassigned | Unassigned | 1273_0 | Clustered | 3 VC_1273_0  | 3   | 0.7979 | 0.99216275 | 0.7916 | 0 | 0 | 0 | 1      | Ref |
| MF595878 | Unassigned | Unassigned | Unassigned | 349_0  | Clustered | 5 VC_349_0   | 5   | 0.191  | 0.97099341 | 0.1855 | 0 | 0 | 0 | 1      | Ref |
| MF612071 | Unassigned | Unassigned | Unassigned | 113_0  | Clustered | 91 VC_113_0  | 91  | 0.9584 | 1          | 0.9584 | 0 | 0 | 0 | 1      | Ref |
| MF612072 | Unassigned | Unassigned | Unassigned | 972_0  | Clustered | 99 VC_972_0  | 99  | 0.9113 | 1          | 0.9113 | 0 | 0 | 0 | 0.9928 | Ref |
| MF612073 | Unassigned | Unassigned | Unassigned | 372_0  | Clustered | 7 VC_372_0   | 7   | 0.3691 | 1          | 0.3691 | 0 | 0 | 0 | 1      | Ref |



|          |            |            |            |        |                     |              |     |        |            |        |   |   |   |            |
|----------|------------|------------|------------|--------|---------------------|--------------|-----|--------|------------|--------|---|---|---|------------|
| MF614100 | Unassigned | Unassigned | Unassigned | 721_0  | Clustered           | 11 VC_721_0  | 11  | 0.8846 | 1          | 0.8846 | 0 | 0 | 0 | 1 Ref      |
| MF614627 | Unassigned | Unassigned | Unassigned | 22_0   | Clustered           | 4 VC_22_0    | 4   | 0.562  | 0.91257778 | 0.5129 | 0 | 0 | 0 | 0.6667 Ref |
| MF614628 | Unassigned | Unassigned | Unassigned | 22_0   | Clustered           | 4 VC_22_0    | 4   | 0.562  | 0.91257778 | 0.5129 | 0 | 0 | 0 | 0.6667 Ref |
| MF621978 | Unassigned | Unassigned | Unassigned | 71_0   | Clustered           | 27 VC_71_0   | 27  | 0.5964 | 1          | 0.5964 | 0 | 0 | 0 | 0.9943 Ref |
| MF623055 | Unassigned | Unassigned | Unassigned | 80_4   | Clustered           | 3 VC_80_4    | 3   | 0.0106 | 0.99632092 | 0.0105 | 0 | 0 | 0 | 0.6667 Ref |
| MF629150 | Unassigned | Unassigned | Unassigned | 1273_0 | Clustered           | 3 VC_1273_0  | 3   | 0.7979 | 0.99216275 | 0.7916 | 0 | 0 | 0 | 1 Ref      |
| MF630921 | Unassigned | Unassigned | Unassigned | 465_0  | Clustered           | 80 VC_465_0  | 80  | 0.9988 | 1          | 0.9988 | 0 | 0 | 0 | 1 Ref      |
| MF663761 | Unassigned | Unassigned | Unassigned | 125_0  | Clustered           | 23 VC_125_0  | 23  | 0.8163 | 1          | 0.8163 | 0 | 0 | 0 | 1 Ref      |
| MF663786 | Unassigned | Unassigned | Unassigned | 129_0  | Clustered/Singleton | 1 VC_129_0   | 1   | 0      | 1          | 0      | 0 | 0 | 0 | 1 Ref      |
| MF668266 | Unassigned | Unassigned | Unassigned | 1208_0 | Clustered           | 6 VC_1208_0  | 6   | 0.8634 | 0.99999946 | 0.8634 | 0 | 0 | 0 | 1 Ref      |
| MF668267 | Unassigned | Unassigned | Unassigned | 243_0  | Clustered           | 72 VC_243_0  | 72  | 0.8089 | 1          | 0.8089 | 0 | 0 | 0 | 1 Ref      |
| MF668268 | Unassigned | Unassigned | Unassigned | 783_0  | Clustered           | 67 VC_783_0  | 67  | 0.8945 | 1          | 0.8945 | 0 | 0 | 0 | 1 Ref      |
| MF668269 | Unassigned | Unassigned | Unassigned | 223_4  | Clustered           | 13 VC_223_4  | 13  | 0.1649 | 1          | 0.1649 | 0 | 0 | 0 | 1 Ref      |
| MF668270 | Unassigned | Unassigned | Unassigned | 538_15 | Clustered           | 2 VC_538_15  | 2   | 0.0078 | 0.957604   | 0.0075 | 0 | 0 | 0 | 0 Ref      |
| MF668272 | Unassigned | Unassigned | Unassigned | 783_0  | Clustered           | 67 VC_783_0  | 67  | 0.8945 | 1          | 0.8945 | 0 | 0 | 0 | 1 Ref      |
| MF668273 | Unassigned | Unassigned | Unassigned | 1208_0 | Clustered           | 6 VC_1208_0  | 6   | 0.8634 | 0.99999946 | 0.8634 | 0 | 0 | 0 | 1 Ref      |
| MF668274 | Unassigned | Unassigned | Unassigned | 1117_0 | Clustered           | 19 VC_1117_0 | 19  | 0.9177 | 1          | 0.9177 | 0 | 0 | 0 | 1 Ref      |
| MF668275 | Unassigned | Unassigned | Unassigned | 883_0  | Clustered           | 5 VC_883_0   | 5   | 0.3514 | 0.99996062 | 0.3514 | 0 | 0 | 0 | 1 Ref      |
| MF668276 | Unassigned | Unassigned | Unassigned | 384_11 | Clustered           | 31 VC_384_11 | 31  | 0.0926 | 1          | 0.0926 | 0 | 0 | 0 | 0.7011 Ref |
| MF668277 | Unassigned | Unassigned | Unassigned | 571_7  | Clustered           | 28 VC_571_7  | 28  | 0.1651 | 1          | 0.1651 | 0 | 0 | 0 | 0.8519 Ref |
| MF668278 | Unassigned | Unassigned | Unassigned | 535_0  | Clustered           | 18 VC_535_0  | 18  | 0.1595 | 1          | 0.1595 | 0 | 0 | 0 | 1 Ref      |
| MF668279 | Unassigned | Unassigned | Unassigned | 1208_0 | Clustered           | 6 VC_1208_0  | 6   | 0.8634 | 0.99999946 | 0.8634 | 0 | 0 | 0 | 1 Ref      |
| MF668280 | Unassigned | Unassigned | Unassigned | 580_0  | Clustered           | 2 VC_580_0   | 2   | 0.011  | 0.95651281 | 0.0105 | 0 | 0 | 0 | 1 Ref      |
| MF668282 | Unassigned | Unassigned | Unassigned | 231_0  | Clustered           | 19 VC_231_0  | 19  | 0.9378 | 1          | 0.9378 | 0 | 0 | 0 | 1 Ref      |
| MF668283 | Unassigned | Unassigned | Unassigned | 335_49 | Clustered           | 17 VC_335_49 | 17  | 0.0731 | 1          | 0.0731 | 0 | 0 | 0 | 0.7721 Ref |
| MF668284 | Unassigned | Unassigned | Unassigned | 566_3  | Clustered           | 4 VC_566_3   | 4   | 0.0418 | 0.92781401 | 0.0388 | 0 | 0 | 0 | 1 Ref      |
| MF668285 | Unassigned | Unassigned | Unassigned | 1200_0 | Clustered           | 73 VC_1200_0 | 73  | 0.9825 | 1          | 0.9825 | 0 | 0 | 0 | 1 Ref      |
| MF668287 | Unassigned | Unassigned | Unassigned | 538_3  | Clustered/Singleton | 1 VC_538_3   | 1   | 0      | 1          | 0      | 0 | 0 | 0 | 1 Ref      |
| MF668288 | Unassigned | Unassigned | Unassigned | 230_0  | Clustered           | 38 VC_230_0  | 38  | 0.9076 | 1          | 0.9076 | 0 | 0 | 0 | 1 Ref      |
| MF678788 | Unassigned | Unassigned | Unassigned | 711_0  | Clustered           | 48 VC_711_0  | 48  | 0.8217 | 1          | 0.8217 | 0 | 0 | 0 | 1 Ref      |
| MF678789 | Unassigned | Unassigned | Unassigned | 711_0  | Clustered           | 48 VC_711_0  | 48  | 0.8217 | 1          | 0.8217 | 0 | 0 | 0 | 1 Ref      |
| MF678790 | Unassigned | Unassigned | Unassigned | 711_0  | Clustered           | 48 VC_711_0  | 48  | 0.8217 | 1          | 0.8217 | 0 | 0 | 0 | 1 Ref      |
| MF681663 | Unassigned | Unassigned | Unassigned | 199_11 | Clustered/Singleton | 1 VC_199_11  | 1   | 0      | 1          | 0      | 0 | 0 | 0 | 1 Ref      |
| MF683623 | Unassigned | Unassigned | Unassigned | 907_0  | Clustered           | 32 VC_907_0  | 32  | 0.9964 | 1          | 0.9964 | 0 | 0 | 0 | 1 Ref      |
| MF695815 | Unassigned | Unassigned | Unassigned | 251_0  | Clustered           | 2 VC_251_0   | 2   | 0.0633 | 0.95608273 | 0.0605 | 0 | 0 | 0 | 1 Ref      |
| MF716957 | Unassigned | Unassigned | Unassigned | 54_0   | Clustered           | 87 VC_54_0   | 87  | 0.9858 | 1          | 0.9858 | 0 | 0 | 0 | 1 Ref      |
| MF740800 | Unassigned | Unassigned | Unassigned | 440_0  | Clustered           | 33 VC_440_0  | 33  | 0.992  | 1          | 0.992  | 0 | 0 | 0 | 1 Ref      |
| MF754111 | Unassigned | Unassigned | Unassigned | 861_0  | Clustered           | 29 VC_861_0  | 29  | 0.9954 | 1          | 0.9954 | 0 | 0 | 0 | 1 Ref      |
| MF754112 | Unassigned | Unassigned | Unassigned | 861_0  | Clustered           | 29 VC_861_0  | 29  | 0.9954 | 1          | 0.9954 | 0 | 0 | 0 | 1 Ref      |
| MF754113 | Unassigned | Unassigned | Unassigned | 911_0  | Clustered           | 20 VC_911_0  | 20  | 0.9915 | 1          | 0.9915 | 0 | 0 | 0 | 1 Ref      |
| MF754114 | Unassigned | Unassigned | Unassigned | 911_0  | Clustered           | 20 VC_911_0  | 20  | 0.9915 | 1          | 0.9915 | 0 | 0 | 0 | 1 Ref      |
| MF754115 | Unassigned | Unassigned | Unassigned | 911_0  | Clustered           | 20 VC_911_0  | 20  | 0.9915 | 1          | 0.9915 | 0 | 0 | 0 | 1 Ref      |
| MF754116 | Unassigned | Unassigned | Unassigned | 911_0  | Clustered           | 20 VC_911_0  | 20  | 0.9915 | 1          | 0.9915 | 0 | 0 | 0 | 1 Ref      |
| MF765814 | Unassigned | Unassigned | Unassigned | 912_1  | Clustered           | 12 VC_912_1  | 12  | 0.2423 | 1          | 0.2423 | 0 | 0 | 0 | 1 Ref      |
| MF766044 | Unassigned | Unassigned | Unassigned | 1015_1 | Clustered           | 26 VC_1015_1 | 26  | 0.6989 | 1          | 0.6989 | 0 | 0 | 0 | 1 Ref      |
| MF766045 | Unassigned | Unassigned | Unassigned | 1015_1 | Clustered           | 26 VC_1015_1 | 26  | 0.6989 | 1          | 0.6989 | 0 | 0 | 0 | 1 Ref      |
| MF766046 | Unassigned | Unassigned | Unassigned | 1015_1 | Clustered           | 26 VC_1015_1 | 26  | 0.6989 | 1          | 0.6989 | 0 | 0 | 0 | 1 Ref      |
| MF766047 | Unassigned | Unassigned | Unassigned | 1015_1 | Clustered           | 26 VC_1015_1 | 26  | 0.6989 | 1          | 0.6989 | 0 | 0 | 0 | 1 Ref      |
| MF766048 | Unassigned | Unassigned | Unassigned | 1015_1 | Clustered           | 26 VC_1015_1 | 26  | 0.6989 | 1          | 0.6989 | 0 | 0 | 0 | 1 Ref      |
| MF768469 | Unassigned | Unassigned | Unassigned | 486_0  | Clustered           | 47 VC_486_0  | 47  | 0.9022 | 1          | 0.9022 | 0 | 0 | 0 | 1 Ref      |
| MF768470 | Unassigned | Unassigned | Unassigned | 80_7   | Clustered           | 33 VC_80_7   | 33  | 0.2156 | 1          | 0.2156 | 0 | 0 | 0 | 0.8409 Ref |
| MF773750 | Unassigned | Unassigned | Unassigned | 533_0  | Clustered           | 16 VC_533_0  | 16  | 0.3765 | 1          | 0.3765 | 0 | 0 | 0 | 1 Ref      |
| MF774688 | Unassigned | Unassigned | Unassigned | 198_30 | Clustered/Singleton | 1 VC_198_30  | 1   | 0      | 1          | 0      | 0 | 0 | 0 | 1 Ref      |
| MF775703 | Unassigned | Unassigned | Unassigned | 210_0  | Clustered           | 105 VC_210_0 | 105 | 0.4076 | 1          | 0.4076 | 0 | 0 | 0 | 0.7766 Ref |
| MF775704 | Unassigned | Unassigned | Unassigned | 210_0  | Clustered           | 105 VC_210_0 | 105 | 0.4076 | 1          | 0.4076 | 0 | 0 | 0 | 0.7766 Ref |
| MF775705 | Unassigned | Unassigned | Unassigned | 210_0  | Clustered           | 105 VC_210_0 | 105 | 0.4076 | 1          | 0.4076 | 0 | 0 | 0 | 0.7766 Ref |
| MF787246 | Unassigned | Unassigned | Unassigned | 544_1  | Clustered/Singleton | 1 VC_544_1   | 1   | 0      | 1          | 0      | 0 | 0 | 0 | 1 Ref      |
| MF788075 | Unassigned | Unassigned | Unassigned | 772_0  | Clustered           | 9 VC_772_0   | 9   | 0.4468 | 1          | 0.4468 | 0 | 0 | 0 | 1 Ref      |
| MF805716 | Unassigned | Unassigned | Unassigned | 356_0  | Clustered           | 21 VC_356_0  | 21  | 0.5409 | 1          | 0.5409 | 0 | 0 | 0 | 1 Ref      |
| MF805809 | Unassigned | Unassigned | Unassigned | 872_0  | Clustered           | 28 VC_872_0  | 28  | 0.7887 | 1          | 0.7887 | 0 | 0 | 0 | 1 Ref      |
| MF807953 | Unassigned | Unassigned | Unassigned | 53_0   | Clustered           | 10 VC_53_0   | 10  | 0.1743 | 1          | 0.1743 | 0 | 0 | 0 | 1 Ref      |
| MF893271 | Unassigned | Unassigned | Unassigned | 145_0  | Clustered           | 6 VC_145_0   | 6   | 0.2581 | 0.86251824 | 0.2226 | 0 | 0 | 0 | 0.8667 Ref |
| MF893340 | Unassigned | Unassigned | Unassigned | 79_6   | Clustered/Singleton | 1 VC_79_6    | 1   | 0      | 1          | 0      | 0 | 0 | 0 | 1 Ref      |
| MF919490 | Unassigned | Unassigned | Unassigned | 223_6  | Clustered           | 42 VC_223_6  | 42  | 0.4717 | 1          | 0.4717 | 0 | 0 | 0 | 0.8351 Ref |
| MF919491 | Unassigned | Unassigned | Unassigned | 787_0  | Clustered           | 132 VC_787_0 | 132 | 1      | 1          | 1      | 0 | 0 | 0 | 1 Ref      |
| MF919492 | Unassigned | Unassigned | Unassigned | 537_0  | Clustered           | 39 VC_537_0  | 39  | 0.8148 | 1          | 0.8148 | 0 | 0 | 0 | 1 Ref      |
| MF919493 | Unassigned | Unassigned | Unassigned | 579_20 | Clustered           | 17 VC_579_20 | 17  | 0.0538 | 1          | 0.0538 | 0 | 0 | 0 | 0.9926 Ref |
| MF919494 | Unassigned | Unassigned | Unassigned | 579_55 | Clustered/Singleton | 1 VC_579_55  | 1   | 0      | 1          | 0      | 0 | 0 | 0 | 1 Ref      |
| MF919495 | Unassigned | Unassigned | Unassigned | 579_74 | Clustered/Singleton | 1 VC_579_74  | 1   | 0      | 1          | 0      | 0 | 0 | 0 | 1 Ref      |
| MF919496 | Unassigned | Unassigned | Unassigned | 535_1  | Clustered           | 108 VC_535_1 | 108 | 0.8479 | 1          | 0.8479 | 0 | 0 | 0 | 0.9955 Ref |
| MF919497 | Unassigned | Unassigned | Unassigned | 783_0  | Clustered           | 67 VC_783_0  | 67  | 0.8945 | 1          | 0.8945 | 0 | 0 | 0 | 1 Ref      |
| MF919499 | Unassigned | Unassigned | Unassigned | 579_50 | Clustered           | 15 VC_579_50 | 15  | 0.0467 | 1          | 0.0467 | 0 | 0 | 0 | 0.9238 Ref |
| MF919500 | Unassigned | Unassigned | Unassigned | 223_6  | Clustered           | 42 VC_223_6  | 42  | 0.4717 | 1          | 0.4717 | 0 | 0 | 0 | 0.8351 Ref |
| MF919501 | Unassigned | Unassigned | Unassigned | 538_63 | Clustered/Singleton | 1 VC_538_63  | 1   | 0      | 1          | 0      | 0 | 0 | 0 | 1 Ref      |
| MF919503 | Unassigned | Unassigned | Unassigned | 384_3  | Clustered           | 22 VC_384_3  | 22  | 0.0786 | 1          | 0.0786 | 0 | 0 | 0 | 0.9048 Ref |
| MF919504 | Unassigned | Unassigned | Unassigned | 566_5  | Clustered/Singleton | 1 VC_566_5   | 1   | 0      | 1          | 0      | 0 | 0 | 0 | 1 Ref      |
| MF919505 | Unassigned | Unassigned | Unassigned | 787_0  | Clustered           | 132 VC_787_0 | 132 | 1      | 1          | 1      | 0 | 0 | 0 | 1 Ref      |
| MF919506 | Unassigned | Unassigned | Unassigned | 571_8  | Clustered           | 19 VC_571_8  | 19  | 0.1031 | 1          | 0.1031 | 0 | 0 | 0 | 0.8713 Ref |
| MF919507 | Unassigned | Unassigned | Unassigned | 384_3  | Clustered           | 22 VC_384_3  | 22  | 0.0786 | 1          | 0.0786 | 0 | 0 | 0 | 0.9048 Ref |
| MF919508 | Unassigned | Unassigned | Unassigned | 335_31 | Clustered           | 2 VC_335_31  | 2   | 0.0036 | 0.94604798 | 0.0034 | 0 | 0 | 0 | 0 Ref      |
| MF919509 | Unassigned | Unassigned | Unassigned | 535_1  | Clustered           | 108 VC_535_1 | 108 | 0.8479 | 1          | 0.8479 | 0 | 0 | 0 | 0.9955 Ref |



|          |            |            |            |        |                     |               |     |        |            |        |   |   |   |            |
|----------|------------|------------|------------|--------|---------------------|---------------|-----|--------|------------|--------|---|---|---|------------|
| MF919510 | Unassigned | Unassigned | Unassigned | 789_0  | Clustered           | 34 VC_789_0   | 34  | 0.9167 | 1          | 0.9167 | 0 | 0 | 0 | 1 Ref      |
| MF919511 | Unassigned | Unassigned | Unassigned | 384_13 | Clustered           | 33 VC_384_13  | 33  | 0.1785 | 1          | 0.1785 | 0 | 0 | 0 | 0.8769 Ref |
| MF919512 | Unassigned | Unassigned | Unassigned | 566_6  | Clustered           | 2 VC_566_6    | 2   | 0.0135 | 0.7810929  | 0.0105 | 0 | 0 | 0 | 1 Ref      |
| MF919513 | Unassigned | Unassigned | Unassigned | 579_77 | Clustered           | 3 VC_579_77   | 3   | 0.0065 | 0.89175063 | 0.0058 | 0 | 0 | 0 | 0.6667 Ref |
| MF919514 | Unassigned | Unassigned | Unassigned | 1136_0 | Clustered           | 40 VC_1136_0  | 40  | 0.8746 | 1          | 0.8746 | 0 | 0 | 0 | 1 Ref      |
| MF919515 | Unassigned | Unassigned | Unassigned | 787_0  | Clustered           | 132 VC_787_0  | 132 | 1      | 1          | 1      | 0 | 0 | 0 | 1 Ref      |
| MF919516 | Unassigned | Unassigned | Unassigned | 787_0  | Clustered           | 132 VC_787_0  | 132 | 1      | 1          | 1      | 0 | 0 | 0 | 1 Ref      |
| MF919517 | Unassigned | Unassigned | Unassigned | 834_0  | Clustered           | 18 VC_834_0   | 18  | 0.9116 | 1          | 0.9116 | 0 | 0 | 0 | 1 Ref      |
| MF919519 | Unassigned | Unassigned | Unassigned | 384_6  | Clustered/Singleton | 1 VC_384_6    | 1   | 0      | 1          | 0      | 0 | 0 | 0 | 1 Ref      |
| MF919520 | Unassigned | Unassigned | Unassigned | 1223_1 | Clustered           | 10 VC_1223_1  | 10  | 0.5795 | 1          | 0.5795 | 0 | 0 | 0 | 1 Ref      |
| MF919521 | Unassigned | Unassigned | Unassigned | 1217_0 | Clustered           | 41 VC_1217_0  | 41  | 0.9546 | 1          | 0.9546 | 0 | 0 | 0 | 0.9976 Ref |
| MF919522 | Unassigned | Unassigned | Unassigned | 787_0  | Clustered           | 132 VC_787_0  | 132 | 1      | 1          | 1      | 0 | 0 | 0 | 1 Ref      |
| MF919523 | Unassigned | Unassigned | Unassigned | 384_3  | Clustered           | 22 VC_384_3   | 22  | 0.0786 | 1          | 0.0786 | 0 | 0 | 0 | 0.9048 Ref |
| MF919524 | Unassigned | Unassigned | Unassigned | 571_8  | Clustered           | 19 VC_571_8   | 19  | 0.1031 | 1          | 0.1031 | 0 | 0 | 0 | 0.8713 Ref |
| MF919525 | Unassigned | Unassigned | Unassigned | 571_8  | Clustered           | 19 VC_571_8   | 19  | 0.1031 | 1          | 0.1031 | 0 | 0 | 0 | 0.8713 Ref |
| MF919526 | Unassigned | Unassigned | Unassigned | 538_81 | Clustered/Singleton | 1 VC_538_81   | 1   | 0      | 1          | 0      | 0 | 0 | 0 | 1 Ref      |
| MF919527 | Unassigned | Unassigned | Unassigned | 579_82 | Clustered           | 3 VC_579_82   | 3   | 0.0064 | 0.86736674 | 0.0056 | 0 | 0 | 0 | 0.6667 Ref |
| MF919528 | Unassigned | Unassigned | Unassigned | 384_11 | Clustered           | 31 VC_384_11  | 31  | 0.0926 | 1          | 0.0926 | 0 | 0 | 0 | 0.7011 Ref |
| MF919529 | Unassigned | Unassigned | Unassigned | 571_8  | Clustered           | 19 VC_571_8   | 19  | 0.1031 | 1          | 0.1031 | 0 | 0 | 0 | 0.8713 Ref |
| MF919530 | Unassigned | Unassigned | Unassigned | 384_3  | Clustered           | 22 VC_384_3   | 22  | 0.0786 | 1          | 0.0786 | 0 | 0 | 0 | 0.9048 Ref |
| MF919531 | Unassigned | Unassigned | Unassigned | 223_6  | Clustered           | 42 VC_223_6   | 42  | 0.4717 | 1          | 0.4717 | 0 | 0 | 0 | 0.8351 Ref |
| MF919532 | Unassigned | Unassigned | Unassigned | 243_0  | Clustered           | 72 VC_243_0   | 72  | 0.8089 | 1          | 0.8089 | 0 | 0 | 0 | 1 Ref      |
| MF919533 | Unassigned | Unassigned | Unassigned | 787_0  | Clustered           | 132 VC_787_0  | 132 | 1      | 1          | 1      | 0 | 0 | 0 | 1 Ref      |
| MF919534 | Unassigned | Unassigned | Unassigned | 566_2  | Clustered           | 3 VC_566_2    | 3   | 0.0275 | 0.85806939 | 0.0236 | 0 | 0 | 0 | 1 Ref      |
| MF919535 | Unassigned | Unassigned | Unassigned | 571_8  | Clustered           | 19 VC_571_8   | 19  | 0.1031 | 1          | 0.1031 | 0 | 0 | 0 | 0.8713 Ref |
| MF919536 | Unassigned | Unassigned | Unassigned | 222_2  | Clustered           | 5 VC_222_2    | 5   | 0.0569 | 0.99999997 | 0.0569 | 0 | 0 | 0 | 1 Ref      |
| MF919537 | Unassigned | Unassigned | Unassigned | 1223_1 | Clustered           | 10 VC_1223_1  | 10  | 0.5795 | 1          | 0.5795 | 0 | 0 | 0 | 1 Ref      |
| MF919538 | Unassigned | Unassigned | Unassigned | 223_4  | Clustered           | 13 VC_223_4   | 13  | 0.1649 | 1          | 0.1649 | 0 | 0 | 0 | 1 Ref      |
| MF919539 | Unassigned | Unassigned | Unassigned | 384_11 | Clustered           | 31 VC_384_11  | 31  | 0.0926 | 1          | 0.0926 | 0 | 0 | 0 | 0.7011 Ref |
| MF919540 | Unassigned | Unassigned | Unassigned | 571_8  | Clustered           | 19 VC_571_8   | 19  | 0.1031 | 1          | 0.1031 | 0 | 0 | 0 | 0.8713 Ref |
| MF919541 | Unassigned | Unassigned | Unassigned | 571_1  | Clustered           | 4 VC_571_1    | 4   | 0.0158 | 0.99966394 | 0.0158 | 0 | 0 | 0 | 0.6667 Ref |
| MF919542 | Unassigned | Unassigned | Unassigned | 789_0  | Clustered           | 34 VC_789_0   | 34  | 0.9167 | 1          | 0.9167 | 0 | 0 | 0 | 1 Ref      |
| MF959099 | Unassigned | Unassigned | Unassigned | 193_0  | Clustered           | 3 VC_193_0    | 3   | 0.4439 | 0.97148006 | 0.4313 | 0 | 0 | 0 | 1 Ref      |
| MF974178 | Unassigned | Unassigned | Unassigned | 77_0   | Clustered           | 37 VC_77_0    | 37  | 0.9392 | 1          | 0.9392 | 0 | 0 | 0 | 1 Ref      |
| MF974396 | Unassigned | Unassigned | Unassigned | 704_0  | Clustered           | 2 VC_704_0    | 2   | 0.9942 | 0.5        | 0.4971 | 0 | 0 | 0 | 1 Ref      |
| MF974397 | Unassigned | Unassigned | Unassigned | 704_0  | Clustered           | 2 VC_704_0    | 2   | 0.9942 | 0.5        | 0.4971 | 0 | 0 | 0 | 1 Ref      |
| MF975638 | Unassigned | Unassigned | Unassigned | 891_0  | Clustered           | 11 VC_891_0   | 11  | 0.9663 | 1          | 0.9663 | 0 | 1 | 0 | 1 Ref      |
| MF975720 | Unassigned | Unassigned | Unassigned | 248_0  | Clustered           | 2 VC_248_0    | 2   | 0.0714 | 0.95429016 | 0.0681 | 0 | 0 | 0 | 1 Ref      |
| MF975721 | Unassigned | Unassigned | Unassigned | 190_0  | Clustered           | 2 VC_190_0    | 2   | 0.0361 | 0.95635532 | 0.0345 | 0 | 0 | 0 | 1 Ref      |
| MF979560 | Unassigned | Unassigned | Unassigned | 873_3  | Clustered           | 2 VC_873_3    | 2   | 0.0243 | 0.85188229 | 0.0207 | 0 | 0 | 0 | 1 Ref      |
| MF979561 | Unassigned | Unassigned | Unassigned | 402_0  | Clustered           | 3 VC_402_0    | 3   | 0.051  | 0.99861562 | 0.051  | 0 | 0 | 0 | 1 Ref      |
| MF979562 | Unassigned | Unassigned | Unassigned | 1275_0 | Clustered           | 4 VC_1275_0   | 4   | 0.747  | 0.9991311  | 0.7463 | 0 | 0 | 0 | 1 Ref      |
| MF979563 | Unassigned | Unassigned | Unassigned | 873_3  | Clustered           | 2 VC_873_3    | 2   | 0.0243 | 0.85188229 | 0.0207 | 0 | 0 | 0 | 1 Ref      |
| MF996376 | Unassigned | Unassigned | Unassigned | 596_0  | Clustered           | 4 VC_596_0    | 4   | 0.0604 | 0.99998766 | 0.0604 | 0 | 0 | 0 | 1 Ref      |
| MF992224 | Unassigned | Unassigned | Unassigned | 279_0  | Clustered           | 11 VC_279_0   | 11  | 0.4839 | 1          | 0.4839 | 0 | 0 | 0 | 0.8727 Ref |
| MG000860 | Unassigned | Unassigned | Unassigned | 87_3   | Clustered           | 19 VC_87_3    | 19  | 0.3645 | 1          | 0.3645 | 0 | 0 | 0 | 0.807 Ref  |
| MG004687 | Unassigned | Unassigned | Unassigned | 466_0  | Clustered           | 66 VC_466_0   | 66  | 0.9246 | 1          | 0.9246 | 0 | 0 | 0 | 1 Ref      |
| MG018224 | Unassigned | Unassigned | Unassigned | 175_0  | Clustered           | 20 VC_175_0   | 20  | 0.7504 | 1          | 0.7504 | 0 | 0 | 0 | 1 Ref      |
| MG018927 | Unassigned | Unassigned | Unassigned | 740_0  | Clustered           | 4 VC_740_0    | 4   | 0.4223 | 0.99997355 | 0.4223 | 0 | 0 | 0 | 1 Ref      |
| MG018928 | Unassigned | Unassigned | Unassigned | 801_1  | Clustered           | 11 VC_801_1   | 11  | 0.1583 | 1          | 0.1583 | 0 | 0 | 0 | 1 Ref      |
| MG018929 | Unassigned | Unassigned | Unassigned | 1067_0 | Clustered           | 20 VC_1067_0  | 20  | 0.7109 | 1          | 0.7109 | 0 | 0 | 0 | 1 Ref      |
| MG018930 | Unassigned | Unassigned | Unassigned | 79_0   | Clustered           | 2 VC_79_0     | 2   | 0.0302 | 0.95617387 | 0.0289 | 0 | 0 | 0 | 1 Ref      |
| MG020111 | Unassigned | Unassigned | Unassigned | 598_0  | Clustered           | 2 VC_598_0    | 2   | 0.1903 | 0.93875121 | 0.1786 | 0 | 0 | 0 | 1 Ref      |
| MG022439 | Unassigned | Unassigned | Unassigned | 794_9  | Clustered           | 7 VC_794_9    | 7   | 0.0369 | 0.87330366 | 0.0322 | 0 | 0 | 0 | 1 Ref      |
| MG022440 | Unassigned | Unassigned | Unassigned | 794_9  | Clustered           | 7 VC_794_9    | 7   | 0.0369 | 0.87330366 | 0.0322 | 0 | 0 | 0 | 1 Ref      |
| MG025518 | Unassigned | Unassigned | Unassigned | 1145_0 | Clustered           | 164 VC_1145_0 | 164 | 0.8868 | 1          | 0.8868 | 0 | 0 | 0 | 1 Ref      |
| MG029509 | Unassigned | Unassigned | Unassigned | 8_0    | Clustered           | 58 VC_8_0     | 58  | 0.8285 | 1          | 0.8285 | 0 | 0 | 0 | 0.9946 Ref |
| MG029510 | Unassigned | Unassigned | Unassigned | 10_0   | Clustered           | 25 VC_10_0    | 25  | 0.3437 | 1          | 0.3437 | 0 | 0 | 0 | 0.9733 Ref |
| MG029511 | Unassigned | Unassigned | Unassigned | 8_0    | Clustered           | 58 VC_8_0     | 58  | 0.8285 | 1          | 0.8285 | 0 | 0 | 0 | 0.9946 Ref |
| MG029512 | Unassigned | Unassigned | Unassigned | 10_0   | Clustered           | 25 VC_10_0    | 25  | 0.3437 | 1          | 0.3437 | 0 | 0 | 0 | 0.9733 Ref |
| MG029513 | Unassigned | Unassigned | Unassigned | 8_0    | Clustered           | 58 VC_8_0     | 58  | 0.8285 | 1          | 0.8285 | 0 | 0 | 0 | 0.9946 Ref |
| MG029514 | Unassigned | Unassigned | Unassigned | 8_0    | Clustered           | 58 VC_8_0     | 58  | 0.8285 | 1          | 0.8285 | 0 | 0 | 0 | 0.9946 Ref |
| MG029515 | Unassigned | Unassigned | Unassigned | 8_0    | Clustered           | 58 VC_8_0     | 58  | 0.8285 | 1          | 0.8285 | 0 | 0 | 0 | 0.9946 Ref |
| MG029516 | Unassigned | Unassigned | Unassigned | 8_0    | Clustered           | 58 VC_8_0     | 58  | 0.8285 | 1          | 0.8285 | 0 | 0 | 0 | 0.9946 Ref |
| MG029517 | Unassigned | Unassigned | Unassigned | 8_0    | Clustered           | 58 VC_8_0     | 58  | 0.8285 | 1          | 0.8285 | 0 | 0 | 0 | 0.9946 Ref |
| MG029518 | Unassigned | Unassigned | Unassigned | 8_0    | Clustered           | 58 VC_8_0     | 58  | 0.8285 | 1          | 0.8285 | 0 | 0 | 0 | 0.9946 Ref |
| MG030346 | Unassigned | Unassigned | Unassigned | 610_0  | Clustered           | 14 VC_610_0   | 14  | 0.5159 | 1          | 0.5159 | 0 | 0 | 0 | 1 Ref      |
| MG049919 | Unassigned | Unassigned | Unassigned | 595_0  | Clustered           | 35 VC_595_0   | 35  | 0.8809 | 1          | 0.8809 | 0 | 0 | 0 | 1 Ref      |
| MG050172 | Unassigned | Unassigned | Unassigned | 470_0  | Clustered           | 62 VC_470_0   | 62  | 0.902  | 1          | 0.902  | 0 | 0 | 0 | 1 Ref      |
| MG065635 | Unassigned | Unassigned | Unassigned | 794_19 | Clustered           | 16 VC_794_19  | 16  | 0.0975 | 0.99616626 | 0.0971 | 0 | 0 | 0 | 0.8083 Ref |
| MG065636 | Unassigned | Unassigned | Unassigned | 975_0  | Clustered           | 40 VC_975_0   | 40  | 0.6888 | 1          | 0.6888 | 0 | 0 | 0 | 1 Ref      |
| MG065639 | Unassigned | Unassigned | Unassigned | 872_0  | Clustered           | 28 VC_872_0   | 28  | 0.7887 | 1          | 0.7887 | 0 | 0 | 0 | 1 Ref      |
| MG065640 | Unassigned | Unassigned | Unassigned | 975_0  | Clustered           | 40 VC_975_0   | 40  | 0.6888 | 1          | 0.6888 | 0 | 0 | 0 | 1 Ref      |
| MG065641 | Unassigned | Unassigned | Unassigned | 975_0  | Clustered           | 40 VC_975_0   | 40  | 0.6888 | 1          | 0.6888 | 0 | 0 | 0 | 1 Ref      |
| MG065642 | Unassigned | Unassigned | Unassigned | 199_19 | Clustered           | 12 VC_199_19  | 12  | 0.0651 | 1          | 0.0651 | 0 | 0 | 0 | 0.8636 Ref |
| MG065643 | Unassigned | Unassigned | Unassigned | 975_0  | Clustered           | 40 VC_975_0   | 40  | 0.6888 | 1          | 0.6888 | 0 | 0 | 0 | 1 Ref      |
| MG065644 | Unassigned | Unassigned | Unassigned | 794_0  | Clustered           | 6 VC_794_0    | 6   | 0.0305 | 0.8101283  | 0.0247 | 0 | 0 | 0 | 1 Ref      |
| MG065645 | Unassigned | Unassigned | Unassigned | 872_0  | Clustered           | 28 VC_872_0   | 28  | 0.7887 | 1          | 0.7887 | 0 | 0 | 0 | 1 Ref      |
| MG065646 | Unassigned | Unassigned | Unassigned | 794_16 | Clustered           | 10 VC_794_16  | 10  | 0.0563 | 0.9411319  | 0.053  | 0 | 0 | 0 | 0.8667 Ref |
| MG065647 | Unassigned | Unassigned | Unassigned | 794_16 | Clustered           | 10 VC_794_16  | 10  | 0.0563 | 0.9411319  | 0.053  | 0 | 0 | 0 | 0.8667 Ref |
| MG065648 | Unassigned | Unassigned | Unassigned | 859_0  | Clustered           | 67 VC_859_0   | 67  | 0.9622 | 1          | 0.9622 | 0 | 0 | 0 | 1 Ref      |



|          |            |            |            |        |                     |              |     |        |            |        |   |   |   |            |
|----------|------------|------------|------------|--------|---------------------|--------------|-----|--------|------------|--------|---|---|---|------------|
| MG065649 | Unassigned | Unassigned | Unassigned | 975_0  | Clustered           | 40 VC_975_0  | 40  | 0.6888 | 1          | 0.6888 | 0 | 0 | 0 | 1 Ref      |
| MG065650 | Unassigned | Unassigned | Unassigned | 871_1  | Clustered           | 26 VC_871_1  | 26  | 0.6303 | 1          | 0.6303 | 0 | 0 | 0 | 0.9815 Ref |
| MG065653 | Unassigned | Unassigned | Unassigned | 794_13 | Clustered/Singleton | 1 VC_794_13  | 1   | 0      | 1          | 0      | 0 | 0 | 0 | 1 Ref      |
| MG065654 | Unassigned | Unassigned | Unassigned | 794_14 | Clustered           | 3 VC_794_14  | 3   | 0.012  | 0.63979507 | 0.0077 | 0 | 0 | 0 | 1 Ref      |
| MG065655 | Unassigned | Unassigned | Unassigned | 794_14 | Clustered           | 3 VC_794_14  | 3   | 0.012  | 0.63979507 | 0.0077 | 0 | 0 | 0 | 1 Ref      |
| MG065656 | Unassigned | Unassigned | Unassigned | 872_0  | Clustered           | 28 VC_872_0  | 28  | 0.7887 | 1          | 0.7887 | 0 | 0 | 0 | 1 Ref      |
| MG065657 | Unassigned | Unassigned | Unassigned | 975_0  | Clustered           | 40 VC_975_0  | 40  | 0.6888 | 1          | 0.6888 | 0 | 0 | 0 | 1 Ref      |
| MG065658 | Unassigned | Unassigned | Unassigned | 794_16 | Clustered           | 10 VC_794_16 | 10  | 0.0563 | 0.9411319  | 0.053  | 0 | 0 | 0 | 0.8667 Ref |
| MG065659 | Unassigned | Unassigned | Unassigned | 794_12 | Clustered/Singleton | 1 VC_794_12  | 1   | 0      | 1          | 0      | 0 | 0 | 0 | 1 Ref      |
| MG065661 | Unassigned | Unassigned | Unassigned | 794_16 | Clustered           | 10 VC_794_16 | 10  | 0.0563 | 0.9411319  | 0.053  | 0 | 0 | 0 | 0.8667 Ref |
| MG065662 | Unassigned | Unassigned | Unassigned | 794_0  | Clustered           | 6 VC_794_0   | 6   | 0.0305 | 0.8101283  | 0.0247 | 0 | 0 | 0 | 1 Ref      |
| MG065663 | Unassigned | Unassigned | Unassigned | 975_0  | Clustered           | 40 VC_975_0  | 40  | 0.6888 | 1          | 0.6888 | 0 | 0 | 0 | 1 Ref      |
| MG065664 | Unassigned | Unassigned | Unassigned | 340_12 | Clustered           | 2 VC_340_12  | 2   | 0.0041 | 0.72605466 | 0.003  | 0 | 0 | 0 | 1 Ref      |
| MG065665 | Unassigned | Unassigned | Unassigned | 975_0  | Clustered           | 40 VC_975_0  | 40  | 0.6888 | 1          | 0.6888 | 0 | 0 | 0 | 1 Ref      |
| MG065666 | Unassigned | Unassigned | Unassigned | 794_14 | Clustered           | 3 VC_794_14  | 3   | 0.012  | 0.63979507 | 0.0077 | 0 | 0 | 0 | 1 Ref      |
| MG065667 | Unassigned | Unassigned | Unassigned | 975_0  | Clustered           | 40 VC_975_0  | 40  | 0.6888 | 1          | 0.6888 | 0 | 0 | 0 | 1 Ref      |
| MG065669 | Unassigned | Unassigned | Unassigned | 975_0  | Clustered           | 40 VC_975_0  | 40  | 0.6888 | 1          | 0.6888 | 0 | 0 | 0 | 1 Ref      |
| MG065670 | Unassigned | Unassigned | Unassigned | 975_0  | Clustered           | 40 VC_975_0  | 40  | 0.6888 | 1          | 0.6888 | 0 | 0 | 0 | 1 Ref      |
| MG065671 | Unassigned | Unassigned | Unassigned | 975_0  | Clustered           | 40 VC_975_0  | 40  | 0.6888 | 1          | 0.6888 | 0 | 0 | 0 | 1 Ref      |
| MG065672 | Unassigned | Unassigned | Unassigned | 794_0  | Clustered           | 6 VC_794_0   | 6   | 0.0305 | 0.8101283  | 0.0247 | 0 | 0 | 0 | 1 Ref      |
| MG065673 | Unassigned | Unassigned | Unassigned | 975_0  | Clustered           | 40 VC_975_0  | 40  | 0.6888 | 1          | 0.6888 | 0 | 0 | 0 | 1 Ref      |
| MG065674 | Unassigned | Unassigned | Unassigned | 794_0  | Clustered           | 6 VC_794_0   | 6   | 0.0305 | 0.8101283  | 0.0247 | 0 | 0 | 0 | 1 Ref      |
| MG065675 | Unassigned | Unassigned | Unassigned | 975_0  | Clustered           | 40 VC_975_0  | 40  | 0.6888 | 1          | 0.6888 | 0 | 0 | 0 | 1 Ref      |
| MG065677 | Unassigned | Unassigned | Unassigned | 794_0  | Clustered           | 6 VC_794_0   | 6   | 0.0305 | 0.8101283  | 0.0247 | 0 | 0 | 0 | 1 Ref      |
| MG065679 | Unassigned | Unassigned | Unassigned | 975_0  | Clustered           | 40 VC_975_0  | 40  | 0.6888 | 1          | 0.6888 | 0 | 0 | 0 | 1 Ref      |
| MG065680 | Unassigned | Unassigned | Unassigned | 975_0  | Clustered           | 40 VC_975_0  | 40  | 0.6888 | 1          | 0.6888 | 0 | 0 | 0 | 1 Ref      |
| MG065681 | Unassigned | Unassigned | Unassigned | 975_0  | Clustered           | 40 VC_975_0  | 40  | 0.6888 | 1          | 0.6888 | 0 | 0 | 0 | 1 Ref      |
| MG065682 | Unassigned | Unassigned | Unassigned | 794_16 | Clustered           | 10 VC_794_16 | 10  | 0.0563 | 0.9411319  | 0.053  | 0 | 0 | 0 | 0.8667 Ref |
| MG065687 | Unassigned | Unassigned | Unassigned | 975_0  | Clustered           | 40 VC_975_0  | 40  | 0.6888 | 1          | 0.6888 | 0 | 0 | 0 | 1 Ref      |
| MG065688 | Unassigned | Unassigned | Unassigned | 470_0  | Clustered           | 62 VC_470_0  | 62  | 0.902  | 1          | 0.902  | 0 | 0 | 0 | 1 Ref      |
| MG065689 | Unassigned | Unassigned | Unassigned | 872_0  | Clustered           | 28 VC_872_0  | 28  | 0.7887 | 1          | 0.7887 | 0 | 0 | 0 | 1 Ref      |
| MG065690 | Unassigned | Unassigned | Unassigned | 794_0  | Clustered           | 6 VC_794_0   | 6   | 0.0305 | 0.8101283  | 0.0247 | 0 | 0 | 0 | 1 Ref      |
| MG065692 | Unassigned | Unassigned | Unassigned | 198_31 | Clustered/Singleton | 1 VC_198_31  | 1   | 0      | 1          | 0      | 0 | 0 | 0 | 1 Ref      |
| MG099933 | Unassigned | Unassigned | Unassigned | 655_0  | Clustered           | 45 VC_655_0  | 45  | 0.7722 | 1          | 0.7722 | 0 | 0 | 0 | 1 Ref      |
| MG099934 | Unassigned | Unassigned | Unassigned | 974_0  | Clustered           | 34 VC_974_0  | 34  | 0.7953 | 1          | 0.7953 | 0 | 0 | 0 | 1 Ref      |
| MG099935 | Unassigned | Unassigned | Unassigned | 893_1  | Clustered           | 20 VC_893_1  | 20  | 0.4792 | 1          | 0.4792 | 0 | 0 | 0 | 1 Ref      |
| MG099936 | Unassigned | Unassigned | Unassigned | 539_0  | Clustered           | 37 VC_539_0  | 37  | 0.911  | 1          | 0.911  | 0 | 0 | 0 | 1 Ref      |
| MG099937 | Unassigned | Unassigned | Unassigned | 974_0  | Clustered           | 34 VC_974_0  | 34  | 0.7953 | 1          | 0.7953 | 0 | 0 | 0 | 1 Ref      |
| MG099938 | Unassigned | Unassigned | Unassigned | 974_0  | Clustered           | 34 VC_974_0  | 34  | 0.7953 | 1          | 0.7953 | 0 | 0 | 0 | 1 Ref      |
| MG099939 | Unassigned | Unassigned | Unassigned | 578_1  | Clustered           | 11 VC_578_1  | 11  | 0.4919 | 1          | 0.4919 | 0 | 0 | 0 | 0.7818 Ref |
| MG099940 | Unassigned | Unassigned | Unassigned | 895_0  | Clustered           | 25 VC_895_0  | 25  | 0.5768 | 1          | 0.5768 | 0 | 0 | 0 | 1 Ref      |
| MG099941 | Unassigned | Unassigned | Unassigned | 1216_0 | Clustered           | 22 VC_1216_0 | 22  | 0.4546 | 1          | 0.4546 | 0 | 0 | 0 | 1 Ref      |
| MG099942 | Unassigned | Unassigned | Unassigned | 535_1  | Clustered           | 108 VC_535_1 | 108 | 0.8479 | 1          | 0.8479 | 0 | 0 | 0 | 0.9955 Ref |
| MG099943 | Unassigned | Unassigned | Unassigned | 577_0  | Clustered           | 21 VC_577_0  | 21  | 0.9908 | 1          | 0.9908 | 0 | 0 | 0 | 1 Ref      |
| MG099944 | Unassigned | Unassigned | Unassigned | 974_0  | Clustered           | 34 VC_974_0  | 34  | 0.7953 | 1          | 0.7953 | 0 | 0 | 0 | 1 Ref      |
| MG099945 | Unassigned | Unassigned | Unassigned | 230_0  | Clustered           | 38 VC_230_0  | 38  | 0.9076 | 1          | 0.9076 | 0 | 0 | 0 | 1 Ref      |
| MG099946 | Unassigned | Unassigned | Unassigned | 783_0  | Clustered           | 67 VC_783_0  | 67  | 0.8945 | 1          | 0.8945 | 0 | 0 | 0 | 1 Ref      |
| MG099947 | Unassigned | Unassigned | Unassigned | 222_0  | Clustered           | 5 VC_222_0   | 5   | 0.072  | 0.99999997 | 0.072  | 0 | 0 | 0 | 1 Ref      |
| MG099948 | Unassigned | Unassigned | Unassigned | 539_0  | Clustered           | 37 VC_539_0  | 37  | 0.911  | 1          | 0.911  | 0 | 0 | 0 | 1 Ref      |
| MG099949 | Unassigned | Unassigned | Unassigned | 974_0  | Clustered           | 34 VC_974_0  | 34  | 0.7953 | 1          | 0.7953 | 0 | 0 | 0 | 1 Ref      |
| MG099950 | Unassigned | Unassigned | Unassigned | 1210_0 | Clustered           | 7 VC_1210_0  | 7   | 0.9808 | 0.99995963 | 0.9807 | 0 | 0 | 0 | 1 Ref      |
| MG099951 | Unassigned | Unassigned | Unassigned | 335_27 | Clustered           | 6 VC_335_27  | 6   | 0.0266 | 1          | 0.0266 | 0 | 0 | 0 | 0.8 Ref    |
| MG099952 | Unassigned | Unassigned | Unassigned | 230_0  | Clustered           | 38 VC_230_0  | 38  | 0.9076 | 1          | 0.9076 | 0 | 0 | 0 | 1 Ref      |
| MG099953 | Unassigned | Unassigned | Unassigned | 571_8  | Clustered           | 19 VC_571_8  | 19  | 0.1031 | 1          | 0.1031 | 0 | 0 | 0 | 0.8713 Ref |
| MG189906 | Unassigned | Unassigned | Unassigned | 936_0  | Clustered           | 3 VC_936_0   | 3   | 0.3378 | 0.99823775 | 0.3372 | 0 | 0 | 0 | 1 Ref      |
| MG197810 | Unassigned | Unassigned | Unassigned | 125_0  | Clustered           | 23 VC_125_0  | 23  | 0.8163 | 1          | 0.8163 | 0 | 0 | 0 | 1 Ref      |
| MG198776 | Unassigned | Unassigned | Unassigned | 790_0  | Clustered           | 8 VC_790_0   | 8   | 0.6981 | 1          | 0.6981 | 0 | 0 | 0 | 1 Ref      |
| MG198777 | Unassigned | Unassigned | Unassigned | 790_0  | Clustered           | 8 VC_790_0   | 8   | 0.6981 | 1          | 0.6981 | 0 | 0 | 0 | 1 Ref      |
| MG198778 | Unassigned | Unassigned | Unassigned | 790_0  | Clustered           | 8 VC_790_0   | 8   | 0.6981 | 1          | 0.6981 | 0 | 0 | 0 | 1 Ref      |
| MG198779 | Unassigned | Unassigned | Unassigned | 1200_0 | Clustered           | 73 VC_1200_0 | 73  | 0.9825 | 1          | 0.9825 | 0 | 0 | 0 | 1 Ref      |
| MG198780 | Unassigned | Unassigned | Unassigned | 790_0  | Clustered           | 8 VC_790_0   | 8   | 0.6981 | 1          | 0.6981 | 0 | 0 | 0 | 1 Ref      |
| MG198781 | Unassigned | Unassigned | Unassigned | 1200_0 | Clustered           | 73 VC_1200_0 | 73  | 0.9825 | 1          | 0.9825 | 0 | 0 | 0 | 1 Ref      |
| MG198782 | Unassigned | Unassigned | Unassigned | 1200_0 | Clustered           | 73 VC_1200_0 | 73  | 0.9825 | 1          | 0.9825 | 0 | 0 | 0 | 1 Ref      |
| MG198783 | Unassigned | Unassigned | Unassigned | 423_0  | Clustered           | 7 VC_423_0   | 7   | 0.7874 | 1          | 0.7874 | 0 | 0 | 0 | 1 Ref      |
| MG198784 | Unassigned | Unassigned | Unassigned | 423_0  | Clustered           | 7 VC_423_0   | 7   | 0.7874 | 1          | 0.7874 | 0 | 0 | 0 | 1 Ref      |
| MG198785 | Unassigned | Unassigned | Unassigned | 537_0  | Clustered           | 39 VC_537_0  | 39  | 0.8148 | 1          | 0.8148 | 0 | 0 | 0 | 1 Ref      |
| MG201401 | Unassigned | Unassigned | Unassigned | 73_0   | Clustered           | 2 VC_73_0    | 2   | 0.077  | 0.95618005 | 0.0736 | 0 | 0 | 0 | 1 Ref      |
| MG208881 | Unassigned | Unassigned | Unassigned | 801_0  | Clustered           | 37 VC_801_0  | 37  | 0.5672 | 1          | 0.5672 | 0 | 0 | 0 | 1 Ref      |
| MG209611 | Unassigned | Unassigned | Unassigned | 965_0  | Clustered           | 2 VC_965_0   | 2   | 0.4025 | 0.89435023 | 0.36   | 0 | 0 | 0 | 1 Ref      |
| MG210949 | Unassigned | Unassigned | Unassigned | 1200_0 | Clustered           | 73 VC_1200_0 | 73  | 0.9825 | 1          | 0.9825 | 0 | 0 | 0 | 1 Ref      |
| MG214764 | Unassigned | Unassigned | Unassigned | 1276_0 | Clustered           | 3 VC_1276_0  | 3   | 1      | 0          | 0      | 0 | 0 | 0 | 1 Ref      |
| MG241338 | Unassigned | Unassigned | Unassigned | 603_0  | Clustered           | 28 VC_603_0  | 28  | 0.7692 | 1          | 0.7692 | 0 | 0 | 0 | 1 Ref      |
| MG250483 | Unassigned | Unassigned | Unassigned | 457_0  | Clustered           | 7 VC_457_0   | 7   | 0.2549 | 1          | 0.2549 | 0 | 0 | 0 | 0.7143 Ref |
| MG250485 | Unassigned | Unassigned | Unassigned | 131_0  | Clustered           | 43 VC_131_0  | 43  | 0.8853 | 1          | 0.8853 | 0 | 0 | 0 | 1 Ref      |
| MG250486 | Unassigned | Unassigned | Unassigned | 601_3  | Clustered           | 12 VC_601_3  | 12  | 0.2339 | 1          | 0.2339 | 0 | 0 | 0 | 0.8636 Ref |
| MG251390 | Unassigned | Unassigned | Unassigned | 466_0  | Clustered           | 66 VC_466_0  | 66  | 0.9246 | 1          | 0.9246 | 0 | 0 | 0 | 1 Ref      |
| MG251391 | Unassigned | Unassigned | Unassigned | 340_1  | Clustered           | 17 VC_340_1  | 17  | 0.0863 | 1          | 0.0863 | 0 | 0 | 0 | 0.8235 Ref |
| MG251392 | Unassigned | Unassigned | Unassigned | 340_1  | Clustered           | 17 VC_340_1  | 17  | 0.0863 | 1          | 0.0863 | 0 | 0 | 0 | 0.8235 Ref |
| MG252615 | Unassigned | Unassigned | Unassigned | 655_0  | Clustered           | 45 VC_655_0  | 45  | 0.7722 | 1          | 0.7722 | 0 | 0 | 0 | 1 Ref      |
| MG252693 | Unassigned | Unassigned | Unassigned | 650_0  | Clustered           | 3 VC_650_0   | 3   | 0.2008 | 0.99838296 | 0.2005 | 0 | 0 | 0 | 1 Ref      |
| MG253647 | Unassigned | Unassigned | Unassigned | 210_0  | Clustered           | 105 VC_210_0 | 105 | 0.4076 | 1          | 0.4076 | 0 | 0 | 0 | 0.7766 Ref |



|          |            |            |            |        |                     |              |     |        |            |        |   |   |   |        |     |
|----------|------------|------------|------------|--------|---------------------|--------------|-----|--------|------------|--------|---|---|---|--------|-----|
| MG253648 | Unassigned | Unassigned | Unassigned | 210_0  | Clustered           | 105 VC_210_0 | 105 | 0.4076 | 1          | 0.4076 | 0 | 0 | 0 | 0.7766 | Ref |
| MG253649 | Unassigned | Unassigned | Unassigned | 210_0  | Clustered           | 105 VC_210_0 | 105 | 0.4076 | 1          | 0.4076 | 0 | 0 | 0 | 0.7766 | Ref |
| MG253650 | Unassigned | Unassigned | Unassigned | 210_0  | Clustered           | 105 VC_210_0 | 105 | 0.4076 | 1          | 0.4076 | 0 | 0 | 0 | 0.7766 | Ref |
| MG253651 | Unassigned | Unassigned | Unassigned | 210_0  | Clustered           | 105 VC_210_0 | 105 | 0.4076 | 1          | 0.4076 | 0 | 0 | 0 | 0.7766 | Ref |
| MG253652 | Unassigned | Unassigned | Unassigned | 210_0  | Clustered           | 105 VC_210_0 | 105 | 0.4076 | 1          | 0.4076 | 0 | 0 | 0 | 0.7766 | Ref |
| MG253653 | Unassigned | Unassigned | Unassigned | 210_0  | Clustered           | 105 VC_210_0 | 105 | 0.4076 | 1          | 0.4076 | 0 | 0 | 0 | 0.7766 | Ref |
| MG264739 | Unassigned | Unassigned | Unassigned | 711_0  | Clustered           | 48 VC_711_0  | 48  | 0.8217 | 1          | 0.8217 | 0 | 0 | 0 | 1      | Ref |
| MG266157 | Unassigned | Unassigned | Unassigned | 133_0  | Clustered           | 17 VC_133_0  | 17  | 0.2654 | 1          | 0.2654 | 0 | 0 | 0 | 1      | Ref |
| MG269973 | Unassigned | Unassigned | Unassigned | 1277_0 | Clustered           | 2 VC_1277_0  | 2   | 1      | 1          | 1      | 0 | 0 | 0 | 1      | Ref |
| MG271909 | Unassigned | Unassigned | Unassigned | 902_0  | Clustered           | 3 VC_902_0   | 3   | 0.8989 | 0.98968122 | 0.8896 | 0 | 0 | 0 | 1      | Ref |
| MG280946 | Unassigned | Unassigned | Unassigned | 611_0  | Clustered           | 50 VC_611_0  | 50  | 0.7306 | 1          | 0.7306 | 0 | 0 | 0 | 1      | Ref |
| MG298964 | Unassigned | Unassigned | Unassigned | 1016_0 | Clustered           | 62 VC_1016_0 | 62  | 0.8638 | 1          | 0.8638 | 0 | 0 | 0 | 0.743  | Ref |
| MG309717 | Unassigned | Unassigned | Unassigned | 210_0  | Clustered           | 105 VC_210_0 | 105 | 0.4076 | 1          | 0.4076 | 0 | 0 | 0 | 0.7766 | Ref |
| MG309718 | Unassigned | Unassigned | Unassigned | 210_0  | Clustered           | 105 VC_210_0 | 105 | 0.4076 | 1          | 0.4076 | 0 | 0 | 0 | 0.7766 | Ref |
| MG324353 | Unassigned | Unassigned | Unassigned | 420_0  | Clustered           | 3 VC_420_0   | 3   | 0.3294 | 0.99825267 | 0.3288 | 0 | 0 | 0 | 1      | Ref |
| MG324354 | Unassigned | Unassigned | Unassigned | 420_0  | Clustered           | 3 VC_420_0   | 3   | 0.3294 | 0.99825267 | 0.3288 | 0 | 0 | 0 | 1      | Ref |
| MG366115 | Unassigned | Unassigned | Unassigned | 767_0  | Clustered/Singleton | 1 VC_767_0   | 1   | 0      | 1          | 0      | 0 | 0 | 0 | 1      | Ref |
| MG383452 | Unassigned | Unassigned | Unassigned | 135_27 | Clustered/Singleton | 1 VC_135_27  | 1   | 0      | 1          | 0      | 0 | 0 | 0 | 1      | Ref |
| MG387042 | Unassigned | Unassigned | Unassigned | 198_26 | Clustered/Singleton | 1 VC_198_26  | 1   | 0      | 1          | 0      | 0 | 0 | 0 | 1      | Ref |
| MG407615 | Unassigned | Unassigned | Unassigned | 30_1   | Clustered           | 53 VC_30_1   | 53  | 0.7151 | 1          | 0.7151 | 0 | 0 | 0 | 0.9325 | Ref |
| MG428990 | Unassigned | Unassigned | Unassigned | 134_2  | Clustered           | 17 VC_134_2  | 17  | 0.1715 | 1          | 0.1715 | 0 | 0 | 0 | 0.9853 | Ref |
| MG428991 | Unassigned | Unassigned | Unassigned | 134_2  | Clustered           | 17 VC_134_2  | 17  | 0.1715 | 1          | 0.1715 | 0 | 0 | 0 | 0.9853 | Ref |
| MG428992 | Unassigned | Unassigned | Unassigned | 135_1  | Clustered/Singleton | 1 VC_135_1   | 1   | 0      | 1          | 0      | 0 | 0 | 0 | 1      | Ref |
| MG432137 | Unassigned | Unassigned | Unassigned | 125_0  | Clustered           | 23 VC_125_0  | 23  | 0.8163 | 1          | 0.8163 | 0 | 0 | 0 | 1      | Ref |
| MG432151 | Unassigned | Unassigned | Unassigned | 486_0  | Clustered           | 47 VC_486_0  | 47  | 0.9022 | 1          | 0.9022 | 0 | 0 | 0 | 1      | Ref |
| MG459218 | Unassigned | Unassigned | Unassigned | 714_0  | Clustered           | 71 VC_714_0  | 71  | 0.935  | 1          | 0.935  | 0 | 0 | 0 | 1      | Ref |
| MG459987 | Unassigned | Unassigned | Unassigned | 200_0  | Clustered           | 15 VC_200_0  | 15  | 0.5004 | 1          | 0.5004 | 0 | 0 | 0 | 1      | Ref |
| MG471392 | Unassigned | Unassigned | Unassigned | 399_0  | Clustered           | 49 VC_399_0  | 49  | 0.7927 | 1          | 0.7927 | 0 | 0 | 0 | 1      | Ref |
| MG488277 | Unassigned | Unassigned | Unassigned | 405_0  | Clustered           | 126 VC_405_0 | 126 | 0.9614 | 1          | 0.9614 | 0 | 0 | 0 | 1      | Ref |
| MG515223 | Unassigned | Unassigned | Unassigned | 1278_0 | Clustered           | 19 VC_1278_0 | 19  | 1      | 1          | 1      | 0 | 0 | 0 | 1      | Ref |
| MG518519 | Unassigned | Unassigned | Unassigned | 1278_0 | Clustered           | 19 VC_1278_0 | 19  | 1      | 1          | 1      | 0 | 0 | 0 | 1      | Ref |
| MG518520 | Unassigned | Unassigned | Unassigned | 1278_0 | Clustered           | 19 VC_1278_0 | 19  | 1      | 1          | 1      | 0 | 0 | 0 | 1      | Ref |
| MG543995 | Unassigned | Unassigned | Unassigned | 12_1   | Clustered           | 2 VC_12_1    | 2   | 0.0189 | 0.95740699 | 0.0181 | 0 | 0 | 0 | 1      | Ref |
| MG545917 | Unassigned | Unassigned | Unassigned | 1067_0 | Clustered           | 20 VC_1067_0 | 20  | 0.7109 | 1          | 0.7109 | 0 | 0 | 0 | 1      | Ref |
| MG550110 | Unassigned | Unassigned | Unassigned | 997_0  | Clustered           | 4 VC_997_0   | 4   | 0.8491 | 0.99879268 | 0.8481 | 0 | 0 | 0 | 1      | Ref |
| MG550111 | Unassigned | Unassigned | Unassigned | 997_0  | Clustered           | 4 VC_997_0   | 4   | 0.8491 | 0.99879268 | 0.8481 | 0 | 0 | 0 | 1      | Ref |
| MG550112 | Unassigned | Unassigned | Unassigned | 473_0  | Clustered           | 3 VC_473_0   | 3   | 0.8515 | 0.99054823 | 0.8434 | 0 | 0 | 0 | 1      | Ref |
| MG550113 | Unassigned | Unassigned | Unassigned | 997_0  | Clustered           | 4 VC_997_0   | 4   | 0.8491 | 0.99879268 | 0.8481 | 0 | 0 | 0 | 1      | Ref |
| MG552615 | Unassigned | Unassigned | Unassigned | 972_0  | Clustered           | 99 VC_972_0  | 99  | 0.9113 | 1          | 0.9113 | 0 | 0 | 0 | 0.9928 | Ref |
| MG557618 | Unassigned | Unassigned | Unassigned | 155_15 | Clustered           | 16 VC_155_15 | 16  | 0.0779 | 1          | 0.0779 | 0 | 0 | 0 | 0.8083 | Ref |
| MG557619 | Unassigned | Unassigned | Unassigned | 9_0    | Clustered           | 38 VC_9_0    | 38  | 0.4859 | 1          | 0.4859 | 0 | 0 | 0 | 1      | Ref |
| MG557979 | Unassigned | Unassigned | Unassigned | 544_0  | Clustered           | 6 VC_544_0   | 6   | 0.4346 | 1          | 0.4346 | 0 | 0 | 0 | 1      | Ref |
| MG563770 | Unassigned | Unassigned | Unassigned | 373_0  | Clustered           | 358 VC_373_0 | 358 | 0.9614 | 1          | 0.9614 | 0 | 0 | 0 | 1      | Ref |
| MG564297 | Unassigned | Unassigned | Unassigned | 12_1   | Clustered           | 2 VC_12_1    | 2   | 0.0189 | 0.95740699 | 0.0181 | 0 | 0 | 0 | 1      | Ref |
| MG575418 | Unassigned | Unassigned | Unassigned | 114_0  | Clustered           | 8 VC_114_0   | 8   | 0.2518 | 1          | 0.2518 | 0 | 0 | 0 | 1      | Ref |
| MG575419 | Unassigned | Unassigned | Unassigned | 114_0  | Clustered           | 8 VC_114_0   | 8   | 0.2518 | 1          | 0.2518 | 0 | 0 | 0 | 1      | Ref |
| MG575421 | Unassigned | Unassigned | Unassigned | 437_0  | Clustered           | 3 VC_437_0   | 3   | 0.107  | 0.99803965 | 0.1068 | 0 | 0 | 0 | 1      | Ref |
| MG581355 | Unassigned | Unassigned | Unassigned | 859_0  | Clustered           | 67 VC_859_0  | 67  | 0.9622 | 1          | 0.9622 | 0 | 0 | 0 | 1      | Ref |
| MG589383 | Unassigned | Unassigned | Unassigned | 293_12 | Clustered           | 3 VC_293_12  | 3   | 0.0146 | 0.92328265 | 0.0135 | 0 | 0 | 0 | 1      | Ref |
| MG589384 | Unassigned | Unassigned | Unassigned | 339_0  | Clustered           | 11 VC_339_0  | 11  | 0.4647 | 1          | 0.4647 | 0 | 0 | 0 | 1      | Ref |
| MG589385 | Unassigned | Unassigned | Unassigned | 486_0  | Clustered           | 47 VC_486_0  | 47  | 0.9022 | 1          | 0.9022 | 0 | 0 | 0 | 1      | Ref |
| MG589386 | Unassigned | Unassigned | Unassigned | 486_0  | Clustered           | 47 VC_486_0  | 47  | 0.9022 | 1          | 0.9022 | 0 | 0 | 0 | 1      | Ref |
| MG589387 | Unassigned | Unassigned | Unassigned | 236_0  | Clustered           | 32 VC_236_0  | 32  | 0.9115 | 1          | 0.9115 | 0 | 0 | 0 | 1      | Ref |
| MG592390 | Unassigned | Unassigned | Unassigned | 664_0  | Clustered           | 8 VC_664_0   | 8   | 0.3124 | 1          | 0.3124 | 0 | 0 | 0 | 1      | Ref |
| MG592391 | Unassigned | Unassigned | Unassigned | 1081_0 | Clustered           | 9 VC_1081_0  | 9   | 0.6523 | 1          | 0.6523 | 0 | 0 | 0 | 1      | Ref |
| MG592392 | Unassigned | Unassigned | Unassigned | 516_0  | Clustered           | 24 VC_516_0  | 24  | 0.8556 | 1          | 0.8556 | 0 | 0 | 0 | 0.9493 | Ref |
| MG592393 | Unassigned | Unassigned | Unassigned | 665_0  | Clustered           | 29 VC_665_0  | 29  | 0.9121 | 1          | 0.9121 | 0 | 0 | 0 | 1      | Ref |
| MG592394 | Unassigned | Unassigned | Unassigned | 1279_0 | Clustered           | 4 VC_1279_0  | 4   | 0.9613 | 0.99374885 | 0.9553 | 0 | 0 | 0 | 1      | Ref |
| MG592395 | Unassigned | Unassigned | Unassigned | 515_0  | Clustered           | 8 VC_515_0   | 8   | 0.3973 | 1          | 0.3973 | 0 | 0 | 0 | 1      | Ref |
| MG592397 | Unassigned | Unassigned | Unassigned | 1091_1 | Clustered           | 29 VC_1091_1 | 29  | 0.4856 | 1          | 0.4856 | 0 | 0 | 0 | 0.9581 | Ref |
| MG592398 | Unassigned | Unassigned | Unassigned | 978_0  | Clustered           | 6 VC_978_0   | 6   | 0.8163 | 1          | 0.8163 | 0 | 0 | 0 | 1      | Ref |
| MG592399 | Unassigned | Unassigned | Unassigned | 563_0  | Clustered           | 6 VC_563_0   | 6   | 0.8633 | 0.99999948 | 0.8633 | 0 | 0 | 0 | 1      | Ref |
| MG592400 | Unassigned | Unassigned | Unassigned | 124_0  | Clustered           | 5 VC_124_0   | 5   | 0.2064 | 0.99999996 | 0.2064 | 0 | 0 | 0 | 1      | Ref |
| MG592401 | Unassigned | Unassigned | Unassigned | 516_0  | Clustered           | 24 VC_516_0  | 24  | 0.8556 | 1          | 0.8556 | 0 | 0 | 0 | 0.9493 | Ref |
| MG592402 | Unassigned | Unassigned | Unassigned | 1279_0 | Clustered           | 4 VC_1279_0  | 4   | 0.9613 | 0.99374885 | 0.9553 | 0 | 0 | 0 | 1      | Ref |
| MG592403 | Unassigned | Unassigned | Unassigned | 303_0  | Clustered           | 6 VC_303_0   | 6   | 0.5341 | 1          | 0.5341 | 0 | 0 | 0 | 1      | Ref |
| MG592404 | Unassigned | Unassigned | Unassigned | 303_0  | Clustered           | 6 VC_303_0   | 6   | 0.5341 | 1          | 0.5341 | 0 | 0 | 0 | 1      | Ref |
| MG592405 | Unassigned | Unassigned | Unassigned | 303_0  | Clustered           | 6 VC_303_0   | 6   | 0.5341 | 1          | 0.5341 | 0 | 0 | 0 | 1      | Ref |
| MG592406 | Unassigned | Unassigned | Unassigned | 1091_1 | Clustered           | 29 VC_1091_1 | 29  | 0.4856 | 1          | 0.4856 | 0 | 0 | 0 | 0.9581 | Ref |
| MG592407 | Unassigned | Unassigned | Unassigned | 1091_1 | Clustered           | 29 VC_1091_1 | 29  | 0.4856 | 1          | 0.4856 | 0 | 0 | 0 | 0.9581 | Ref |
| MG592408 | Unassigned | Unassigned | Unassigned | 1091_1 | Clustered           | 29 VC_1091_1 | 29  | 0.4856 | 1          | 0.4856 | 0 | 0 | 0 | 0.9581 | Ref |
| MG592409 | Unassigned | Unassigned | Unassigned | 809_0  | Clustered           | 7 VC_809_0   | 7   | 0.5153 | 1          | 0.5153 | 0 | 0 | 0 | 1      | Ref |
| MG592410 | Unassigned | Unassigned | Unassigned | 809_0  | Clustered           | 7 VC_809_0   | 7   | 0.5153 | 1          | 0.5153 | 0 | 0 | 0 | 1      | Ref |
| MG592411 | Unassigned | Unassigned | Unassigned | 1091_0 | Clustered           | 24 VC_1091_0 | 24  | 0.5254 | 1          | 0.5254 | 0 | 0 | 0 | 1      | Ref |
| MG592412 | Unassigned | Unassigned | Unassigned | 255_0  | Clustered           | 11 VC_255_0  | 11  | 0.7034 | 1          | 0.7034 | 0 | 0 | 0 | 1      | Ref |
| MG592414 | Unassigned | Unassigned | Unassigned | 516_0  | Clustered           | 24 VC_516_0  | 24  | 0.8556 | 1          | 0.8556 | 0 | 0 | 0 | 0.9493 | Ref |
| MG592415 | Unassigned | Unassigned | Unassigned | 494_0  | Clustered           | 2 VC_494_0   | 2   | 0.3459 | 0.94728727 | 0.3277 | 0 | 0 | 0 | 1      | Ref |
| MG592416 | Unassigned | Unassigned | Unassigned | 1091_1 | Clustered           | 29 VC_1091_1 | 29  | 0.4856 | 1          | 0.4856 | 0 | 0 | 0 | 0.9581 | Ref |
| MG592417 | Unassigned | Unassigned | Unassigned | 1091_1 | Clustered           | 29 VC_1091_1 | 29  | 0.4856 | 1          | 0.4856 | 0 | 0 | 0 | 0.9581 | Ref |
| MG592418 | Unassigned | Unassigned | Unassigned | 563_0  | Clustered           | 6 VC_563_0   | 6   | 0.8633 | 0.99999948 | 0.8633 | 0 | 0 | 0 | 1      | Ref |
| MG592419 | Unassigned | Unassigned | Unassigned | 563_0  | Clustered           | 6 VC_563_0   | 6   | 0.8633 | 0.99999948 | 0.8633 | 0 | 0 | 0 | 1      | Ref |



|          |            |            |            |        |                     |              |    |        |            |        |   |   |   |            |
|----------|------------|------------|------------|--------|---------------------|--------------|----|--------|------------|--------|---|---|---|------------|
| MG592420 | Unassigned | Unassigned | Unassigned | 664_0  | Clustered           | 8 VC_664_0   | 8  | 0.3124 | 1          | 0.3124 | 0 | 0 | 0 | 1 Ref      |
| MG592421 | Unassigned | Unassigned | Unassigned | 1081_0 | Clustered           | 9 VC_1081_0  | 9  | 0.6523 | 1          | 0.6523 | 0 | 0 | 0 | 1 Ref      |
| MG592422 | Unassigned | Unassigned | Unassigned | 124_0  | Clustered           | 5 VC_124_0   | 5  | 0.2064 | 0.99999996 | 0.2064 | 0 | 0 | 0 | 1 Ref      |
| MG592423 | Unassigned | Unassigned | Unassigned | 664_0  | Clustered           | 8 VC_664_0   | 8  | 0.3124 | 1          | 0.3124 | 0 | 0 | 0 | 1 Ref      |
| MG592425 | Unassigned | Unassigned | Unassigned | 124_0  | Clustered           | 5 VC_124_0   | 5  | 0.2064 | 0.99999996 | 0.2064 | 0 | 0 | 0 | 1 Ref      |
| MG592427 | Unassigned | Unassigned | Unassigned | 1279_0 | Clustered           | 4 VC_1279_0  | 4  | 0.9613 | 0.99374885 | 0.9553 | 0 | 0 | 0 | 1 Ref      |
| MG592428 | Unassigned | Unassigned | Unassigned | 1091_1 | Clustered           | 29 VC_1091_1 | 29 | 0.4856 | 1          | 0.4856 | 0 | 0 | 0 | 0.9581 Ref |
| MG592429 | Unassigned | Unassigned | Unassigned | 981_0  | Clustered           | 9 VC_981_0   | 9  | 0.5418 | 1          | 0.5418 | 0 | 0 | 0 | 1 Ref      |
| MG592431 | Unassigned | Unassigned | Unassigned | 851_0  | Clustered           | 6 VC_851_0   | 6  | 0.7471 | 1          | 0.7471 | 0 | 0 | 0 | 1 Ref      |
| MG592432 | Unassigned | Unassigned | Unassigned | 851_0  | Clustered           | 6 VC_851_0   | 6  | 0.7471 | 1          | 0.7471 | 0 | 0 | 0 | 1 Ref      |
| MG592434 | Unassigned | Unassigned | Unassigned | 124_1  | Clustered/Singleton | 1 VC_124_1   | 1  | 0      | 1          | 0      | 0 | 0 | 0 | 1 Ref      |
| MG592435 | Unassigned | Unassigned | Unassigned | 851_0  | Clustered           | 6 VC_851_0   | 6  | 0.7471 | 1          | 0.7471 | 0 | 0 | 0 | 1 Ref      |
| MG592436 | Unassigned | Unassigned | Unassigned | 1081_0 | Clustered           | 9 VC_1081_0  | 9  | 0.6523 | 1          | 0.6523 | 0 | 0 | 0 | 1 Ref      |
| MG592438 | Unassigned | Unassigned | Unassigned | 981_0  | Clustered           | 9 VC_981_0   | 9  | 0.5418 | 1          | 0.5418 | 0 | 0 | 0 | 1 Ref      |
| MG592439 | Unassigned | Unassigned | Unassigned | 664_0  | Clustered           | 8 VC_664_0   | 8  | 0.3124 | 1          | 0.3124 | 0 | 0 | 0 | 1 Ref      |
| MG592441 | Unassigned | Unassigned | Unassigned | 511_8  | Clustered/Singleton | 1 VC_511_8   | 1  | 0      | 1          | 0      | 0 | 0 | 0 | 1 Ref      |
| MG592442 | Unassigned | Unassigned | Unassigned | 957_0  | Clustered           | 34 VC_957_0  | 34 | 0.8934 | 1          | 0.8934 | 0 | 0 | 0 | 0.9768 Ref |
| MG592443 | Unassigned | Unassigned | Unassigned | 1081_0 | Clustered           | 9 VC_1081_0  | 9  | 0.6523 | 1          | 0.6523 | 0 | 0 | 0 | 1 Ref      |
| MG592444 | Unassigned | Unassigned | Unassigned | 664_0  | Clustered           | 8 VC_664_0   | 8  | 0.3124 | 1          | 0.3124 | 0 | 0 | 0 | 1 Ref      |
| MG592445 | Unassigned | Unassigned | Unassigned | 1081_0 | Clustered           | 9 VC_1081_0  | 9  | 0.6523 | 1          | 0.6523 | 0 | 0 | 0 | 1 Ref      |
| MG592447 | Unassigned | Unassigned | Unassigned | 564_0  | Clustered           | 2 VC_564_0   | 2  | 0.3503 | 0.94059057 | 0.3295 | 0 | 0 | 0 | 1 Ref      |
| MG592448 | Unassigned | Unassigned | Unassigned | 124_0  | Clustered           | 5 VC_124_0   | 5  | 0.2064 | 0.99999996 | 0.2064 | 0 | 0 | 0 | 1 Ref      |
| MG592449 | Unassigned | Unassigned | Unassigned | 1081_0 | Clustered           | 9 VC_1081_0  | 9  | 0.6523 | 1          | 0.6523 | 0 | 0 | 0 | 1 Ref      |
| MG592450 | Unassigned | Unassigned | Unassigned | 957_0  | Clustered           | 34 VC_957_0  | 34 | 0.8934 | 1          | 0.8934 | 0 | 0 | 0 | 0.9768 Ref |
| MG592451 | Unassigned | Unassigned | Unassigned | 516_0  | Clustered           | 24 VC_516_0  | 24 | 0.8556 | 1          | 0.8556 | 0 | 0 | 0 | 0.9493 Ref |
| MG592453 | Unassigned | Unassigned | Unassigned | 564_0  | Clustered           | 2 VC_564_0   | 2  | 0.3503 | 0.94059057 | 0.3295 | 0 | 0 | 0 | 1 Ref      |
| MG592454 | Unassigned | Unassigned | Unassigned | 664_0  | Clustered           | 8 VC_664_0   | 8  | 0.3124 | 1          | 0.3124 | 0 | 0 | 0 | 1 Ref      |
| MG592455 | Unassigned | Unassigned | Unassigned | 1279_0 | Clustered           | 4 VC_1279_0  | 4  | 0.9613 | 0.99374885 | 0.9553 | 0 | 0 | 0 | 1 Ref      |
| MG592456 | Unassigned | Unassigned | Unassigned | 549_4  | Clustered/Singleton | 1 VC_549_4   | 1  | 0      | 1          | 0      | 0 | 0 | 0 | 1 Ref      |
| MG592457 | Unassigned | Unassigned | Unassigned | 957_0  | Clustered           | 34 VC_957_0  | 34 | 0.8934 | 1          | 0.8934 | 0 | 0 | 0 | 0.9768 Ref |
| MG592458 | Unassigned | Unassigned | Unassigned | 851_0  | Clustered           | 6 VC_851_0   | 6  | 0.7471 | 1          | 0.7471 | 0 | 0 | 0 | 1 Ref      |
| MG592460 | Unassigned | Unassigned | Unassigned | 957_0  | Clustered           | 34 VC_957_0  | 34 | 0.8934 | 1          | 0.8934 | 0 | 0 | 0 | 0.9768 Ref |
| MG592461 | Unassigned | Unassigned | Unassigned | 516_0  | Clustered           | 24 VC_516_0  | 24 | 0.8556 | 1          | 0.8556 | 0 | 0 | 0 | 0.9493 Ref |
| MG592462 | Unassigned | Unassigned | Unassigned | 516_0  | Clustered           | 24 VC_516_0  | 24 | 0.8556 | 1          | 0.8556 | 0 | 0 | 0 | 0.9493 Ref |
| MG592463 | Unassigned | Unassigned | Unassigned | 1091_1 | Clustered           | 29 VC_1091_1 | 29 | 0.4856 | 1          | 0.4856 | 0 | 0 | 0 | 0.9581 Ref |
| MG592464 | Unassigned | Unassigned | Unassigned | 1091_1 | Clustered           | 29 VC_1091_1 | 29 | 0.4856 | 1          | 0.4856 | 0 | 0 | 0 | 0.9581 Ref |
| MG592465 | Unassigned | Unassigned | Unassigned | 664_0  | Clustered           | 8 VC_664_0   | 8  | 0.3124 | 1          | 0.3124 | 0 | 0 | 0 | 1 Ref      |
| MG592466 | Unassigned | Unassigned | Unassigned | 664_0  | Clustered           | 8 VC_664_0   | 8  | 0.3124 | 1          | 0.3124 | 0 | 0 | 0 | 1 Ref      |
| MG592467 | Unassigned | Unassigned | Unassigned | 516_0  | Clustered           | 24 VC_516_0  | 24 | 0.8556 | 1          | 0.8556 | 0 | 0 | 0 | 0.9493 Ref |
| MG592468 | Unassigned | Unassigned | Unassigned | 516_0  | Clustered           | 24 VC_516_0  | 24 | 0.8556 | 1          | 0.8556 | 0 | 0 | 0 | 0.9493 Ref |
| MG592470 | Unassigned | Unassigned | Unassigned | 809_0  | Clustered           | 7 VC_809_0   | 7  | 0.5153 | 1          | 0.5153 | 0 | 0 | 0 | 1 Ref      |
| MG592471 | Unassigned | Unassigned | Unassigned | 1091_1 | Clustered           | 29 VC_1091_1 | 29 | 0.4856 | 1          | 0.4856 | 0 | 0 | 0 | 0.9581 Ref |
| MG592472 | Unassigned | Unassigned | Unassigned | 516_0  | Clustered           | 24 VC_516_0  | 24 | 0.8556 | 1          | 0.8556 | 0 | 0 | 0 | 0.9493 Ref |
| MG592475 | Unassigned | Unassigned | Unassigned | 1091_1 | Clustered           | 29 VC_1091_1 | 29 | 0.4856 | 1          | 0.4856 | 0 | 0 | 0 | 0.9581 Ref |
| MG592476 | Unassigned | Unassigned | Unassigned | 1091_1 | Clustered           | 29 VC_1091_1 | 29 | 0.4856 | 1          | 0.4856 | 0 | 0 | 0 | 0.9581 Ref |
| MG592477 | Unassigned | Unassigned | Unassigned | 665_0  | Clustered           | 29 VC_665_0  | 29 | 0.9121 | 1          | 0.9121 | 0 | 0 | 0 | 1 Ref      |
| MG592478 | Unassigned | Unassigned | Unassigned | 665_0  | Clustered           | 29 VC_665_0  | 29 | 0.9121 | 1          | 0.9121 | 0 | 0 | 0 | 1 Ref      |
| MG592482 | Unassigned | Unassigned | Unassigned | 957_0  | Clustered           | 34 VC_957_0  | 34 | 0.8934 | 1          | 0.8934 | 0 | 0 | 0 | 0.9768 Ref |
| MG592483 | Unassigned | Unassigned | Unassigned | 957_0  | Clustered           | 34 VC_957_0  | 34 | 0.8934 | 1          | 0.8934 | 0 | 0 | 0 | 0.9768 Ref |
| MG592484 | Unassigned | Unassigned | Unassigned | 1234_0 | Clustered           | 2 VC_1234_0  | 2  | 0.5074 | 0.94764538 | 0.4809 | 0 | 0 | 0 | 1 Ref      |
| MG592485 | Unassigned | Unassigned | Unassigned | 1234_0 | Clustered           | 2 VC_1234_0  | 2  | 0.5074 | 0.94764538 | 0.4809 | 0 | 0 | 0 | 1 Ref      |
| MG592486 | Unassigned | Unassigned | Unassigned | 124_0  | Clustered           | 5 VC_124_0   | 5  | 0.2064 | 0.99999996 | 0.2064 | 0 | 0 | 0 | 1 Ref      |
| MG592487 | Unassigned | Unassigned | Unassigned | 981_0  | Clustered           | 9 VC_981_0   | 9  | 0.5418 | 1          | 0.5418 | 0 | 0 | 0 | 1 Ref      |
| MG592488 | Unassigned | Unassigned | Unassigned | 957_0  | Clustered           | 34 VC_957_0  | 34 | 0.8934 | 1          | 0.8934 | 0 | 0 | 0 | 0.9768 Ref |
| MG592489 | Unassigned | Unassigned | Unassigned | 957_0  | Clustered           | 34 VC_957_0  | 34 | 0.8934 | 1          | 0.8934 | 0 | 0 | 0 | 0.9768 Ref |
| MG592490 | Unassigned | Unassigned | Unassigned | 957_0  | Clustered           | 34 VC_957_0  | 34 | 0.8934 | 1          | 0.8934 | 0 | 0 | 0 | 0.9768 Ref |
| MG592492 | Unassigned | Unassigned | Unassigned | 1091_1 | Clustered           | 29 VC_1091_1 | 29 | 0.4856 | 1          | 0.4856 | 0 | 0 | 0 | 0.9581 Ref |
| MG592493 | Unassigned | Unassigned | Unassigned | 1091_1 | Clustered           | 29 VC_1091_1 | 29 | 0.4856 | 1          | 0.4856 | 0 | 0 | 0 | 0.9581 Ref |
| MG592494 | Unassigned | Unassigned | Unassigned | 661_3  | Clustered           | 9 VC_661_3   | 9  | 0.2124 | 1          | 0.2124 | 0 | 0 | 0 | 0.6944 Ref |
| MG592495 | Unassigned | Unassigned | Unassigned | 511_6  | Clustered/Singleton | 1 VC_511_6   | 1  | 0      | 1          | 0      | 0 | 0 | 0 | 1 Ref      |
| MG592496 | Unassigned | Unassigned | Unassigned | 978_0  | Clustered           | 6 VC_978_0   | 6  | 0.8163 | 1          | 0.8163 | 0 | 0 | 0 | 1 Ref      |
| MG592497 | Unassigned | Unassigned | Unassigned | 978_0  | Clustered           | 6 VC_978_0   | 6  | 0.8163 | 1          | 0.8163 | 0 | 0 | 0 | 1 Ref      |
| MG592499 | Unassigned | Unassigned | Unassigned | 516_0  | Clustered           | 24 VC_516_0  | 24 | 0.8556 | 1          | 0.8556 | 0 | 0 | 0 | 0.9493 Ref |
| MG592501 | Unassigned | Unassigned | Unassigned | 661_3  | Clustered           | 9 VC_661_3   | 9  | 0.2124 | 1          | 0.2124 | 0 | 0 | 0 | 0.6944 Ref |
| MG592502 | Unassigned | Unassigned | Unassigned | 957_0  | Clustered           | 34 VC_957_0  | 34 | 0.8934 | 1          | 0.8934 | 0 | 0 | 0 | 0.9768 Ref |
| MG592503 | Unassigned | Unassigned | Unassigned | 957_0  | Clustered           | 34 VC_957_0  | 34 | 0.8934 | 1          | 0.8934 | 0 | 0 | 0 | 0.9768 Ref |
| MG592504 | Unassigned | Unassigned | Unassigned | 957_0  | Clustered           | 34 VC_957_0  | 34 | 0.8934 | 1          | 0.8934 | 0 | 0 | 0 | 0.9768 Ref |
| MG592505 | Unassigned | Unassigned | Unassigned | 957_0  | Clustered           | 34 VC_957_0  | 34 | 0.8934 | 1          | 0.8934 | 0 | 0 | 0 | 0.9768 Ref |
| MG592506 | Unassigned | Unassigned | Unassigned | 661_0  | Clustered           | 7 VC_661_0   | 7  | 0.15   | 1          | 0.15   | 0 | 0 | 0 | 0.7619 Ref |
| MG592507 | Unassigned | Unassigned | Unassigned | 255_0  | Clustered           | 11 VC_255_0  | 11 | 0.7034 | 1          | 0.7034 | 0 | 0 | 0 | 1 Ref      |
| MG592508 | Unassigned | Unassigned | Unassigned | 661_3  | Clustered           | 9 VC_661_3   | 9  | 0.2124 | 1          | 0.2124 | 0 | 0 | 0 | 0.6944 Ref |
| MG592509 | Unassigned | Unassigned | Unassigned | 518_0  | Clustered           | 16 VC_518_0  | 16 | 0.9983 | 1          | 0.9983 | 0 | 0 | 0 | 1 Ref      |
| MG592510 | Unassigned | Unassigned | Unassigned | 563_0  | Clustered           | 6 VC_563_0   | 6  | 0.8633 | 0.99999948 | 0.8633 | 0 | 0 | 0 | 1 Ref      |
| MG592511 | Unassigned | Unassigned | Unassigned | 563_0  | Clustered           | 6 VC_563_0   | 6  | 0.8633 | 0.99999948 | 0.8633 | 0 | 0 | 0 | 1 Ref      |
| MG592513 | Unassigned | Unassigned | Unassigned | 255_0  | Clustered           | 11 VC_255_0  | 11 | 0.7034 | 1          | 0.7034 | 0 | 0 | 0 | 1 Ref      |
| MG592514 | Unassigned | Unassigned | Unassigned | 661_3  | Clustered           | 9 VC_661_3   | 9  | 0.2124 | 1          | 0.2124 | 0 | 0 | 0 | 0.6944 Ref |
| MG592516 | Unassigned | Unassigned | Unassigned | 957_0  | Clustered           | 34 VC_957_0  | 34 | 0.8934 | 1          | 0.8934 | 0 | 0 | 0 | 0.9768 Ref |
| MG592517 | Unassigned | Unassigned | Unassigned | 957_0  | Clustered           | 34 VC_957_0  | 34 | 0.8934 | 1          | 0.8934 | 0 | 0 | 0 | 0.9768 Ref |
| MG592518 | Unassigned | Unassigned | Unassigned | 665_0  | Clustered           | 29 VC_665_0  | 29 | 0.9121 | 1          | 0.9121 | 0 | 0 | 0 | 1 Ref      |
| MG592519 | Unassigned | Unassigned | Unassigned | 809_0  | Clustered           | 7 VC_809_0   | 7  | 0.5153 | 1          | 0.5153 | 0 | 0 | 0 | 1 Ref      |
| MG592520 | Unassigned | Unassigned | Unassigned | 959_0  | Clustered           | 3 VC_959_0   | 3  | 0.9422 | 0.99430386 | 0.9369 | 0 | 0 | 0 | 1 Ref      |



|          |            |            |            |        |                     |              |    |        |            |        |   |   |   |            |
|----------|------------|------------|------------|--------|---------------------|--------------|----|--------|------------|--------|---|---|---|------------|
| MG592521 | Unassigned | Unassigned | Unassigned | 809_0  | Clustered           | 7 VC_809_0   | 7  | 0.5153 | 1          | 0.5153 | 0 | 0 | 0 | 1 Ref      |
| MG592522 | Unassigned | Unassigned | Unassigned | 941_0  | Clustered           | 5 VC_941_0   | 5  | 0.7412 | 0.99999276 | 0.7412 | 0 | 0 | 0 | 1 Ref      |
| MG592523 | Unassigned | Unassigned | Unassigned | 117_0  | Clustered           | 2 VC_117_0   | 2  | 0.4363 | 0.8861     | 0.3866 | 0 | 0 | 0 | 1 Ref      |
| MG592524 | Unassigned | Unassigned | Unassigned | 255_0  | Clustered           | 11 VC_255_0  | 11 | 0.7034 | 1          | 0.7034 | 0 | 0 | 0 | 1 Ref      |
| MG592525 | Unassigned | Unassigned | Unassigned | 957_0  | Clustered           | 34 VC_957_0  | 34 | 0.8934 | 1          | 0.8934 | 0 | 0 | 0 | 0.9768 Ref |
| MG592526 | Unassigned | Unassigned | Unassigned | 516_0  | Clustered           | 24 VC_516_0  | 24 | 0.8556 | 1          | 0.8556 | 0 | 0 | 0 | 0.9493 Ref |
| MG592527 | Unassigned | Unassigned | Unassigned | 255_0  | Clustered           | 11 VC_255_0  | 11 | 0.7034 | 1          | 0.7034 | 0 | 0 | 0 | 1 Ref      |
| MG592528 | Unassigned | Unassigned | Unassigned | 1091_1 | Clustered           | 29 VC_1091_1 | 29 | 0.4856 | 1          | 0.4856 | 0 | 0 | 0 | 0.9581 Ref |
| MG592529 | Unassigned | Unassigned | Unassigned | 511_2  | Clustered/Singleton | 1 VC_511_2   | 1  | 0      | 1          | 0      | 0 | 0 | 0 | 1 Ref      |
| MG592530 | Unassigned | Unassigned | Unassigned | 957_0  | Clustered           | 34 VC_957_0  | 34 | 0.8934 | 1          | 0.8934 | 0 | 0 | 0 | 0.9768 Ref |
| MG592531 | Unassigned | Unassigned | Unassigned | 516_0  | Clustered           | 24 VC_516_0  | 24 | 0.8556 | 1          | 0.8556 | 0 | 0 | 0 | 0.9493 Ref |
| MG592532 | Unassigned | Unassigned | Unassigned | 957_0  | Clustered           | 34 VC_957_0  | 34 | 0.8934 | 1          | 0.8934 | 0 | 0 | 0 | 0.9768 Ref |
| MG592533 | Unassigned | Unassigned | Unassigned | 1280_0 | Clustered           | 2 VC_1280_0  | 2  | 0.6481 | 0.86822376 | 0.5627 | 0 | 0 | 0 | 1 Ref      |
| MG592534 | Unassigned | Unassigned | Unassigned | 957_0  | Clustered           | 34 VC_957_0  | 34 | 0.8934 | 1          | 0.8934 | 0 | 0 | 0 | 0.9768 Ref |
| MG592535 | Unassigned | Unassigned | Unassigned | 957_0  | Clustered           | 34 VC_957_0  | 34 | 0.8934 | 1          | 0.8934 | 0 | 0 | 0 | 0.9768 Ref |
| MG592536 | Unassigned | Unassigned | Unassigned | 1133_0 | Clustered           | 6 VC_1133_0  | 6  | 0.9291 | 0.99999982 | 0.9291 | 0 | 0 | 0 | 1 Ref      |
| MG592538 | Unassigned | Unassigned | Unassigned | 1091_0 | Clustered           | 24 VC_1091_0 | 24 | 0.5254 | 1          | 0.5254 | 0 | 0 | 0 | 1 Ref      |
| MG592539 | Unassigned | Unassigned | Unassigned | 957_0  | Clustered           | 34 VC_957_0  | 34 | 0.8934 | 1          | 0.8934 | 0 | 0 | 0 | 0.9768 Ref |
| MG592540 | Unassigned | Unassigned | Unassigned | 665_0  | Clustered           | 29 VC_665_0  | 29 | 0.9121 | 1          | 0.9121 | 0 | 0 | 0 | 1 Ref      |
| MG592541 | Unassigned | Unassigned | Unassigned | 516_0  | Clustered           | 24 VC_516_0  | 24 | 0.8556 | 1          | 0.8556 | 0 | 0 | 0 | 0.9493 Ref |
| MG592542 | Unassigned | Unassigned | Unassigned | 516_0  | Clustered           | 24 VC_516_0  | 24 | 0.8556 | 1          | 0.8556 | 0 | 0 | 0 | 0.9493 Ref |
| MG592543 | Unassigned | Unassigned | Unassigned | 957_0  | Clustered           | 34 VC_957_0  | 34 | 0.8934 | 1          | 0.8934 | 0 | 0 | 0 | 0.9768 Ref |
| MG592544 | Unassigned | Unassigned | Unassigned | 661_5  | Clustered           | 4 VC_661_5   | 4  | 0.0894 | 0.99996664 | 0.0894 | 0 | 0 | 0 | 1 Ref      |
| MG592545 | Unassigned | Unassigned | Unassigned | 661_0  | Clustered           | 7 VC_661_0   | 7  | 0.15   | 1          | 0.15   | 0 | 0 | 0 | 0.7619 Ref |
| MG592546 | Unassigned | Unassigned | Unassigned | 518_0  | Clustered           | 16 VC_518_0  | 16 | 0.9983 | 1          | 0.9983 | 0 | 0 | 0 | 1 Ref      |
| MG592547 | Unassigned | Unassigned | Unassigned | 516_0  | Clustered           | 24 VC_516_0  | 24 | 0.8556 | 1          | 0.8556 | 0 | 0 | 0 | 0.9493 Ref |
| MG592549 | Unassigned | Unassigned | Unassigned | 831_0  | Clustered           | 17 VC_831_0  | 17 | 0.9057 | 1          | 0.9057 | 0 | 0 | 0 | 1 Ref      |
| MG592550 | Unassigned | Unassigned | Unassigned | 831_0  | Clustered           | 17 VC_831_0  | 17 | 0.9057 | 1          | 0.9057 | 0 | 0 | 0 | 1 Ref      |
| MG592551 | Unassigned | Unassigned | Unassigned | 303_0  | Clustered           | 6 VC_303_0   | 6  | 0.5341 | 1          | 0.5341 | 0 | 0 | 0 | 1 Ref      |
| MG592552 | Unassigned | Unassigned | Unassigned | 665_0  | Clustered           | 29 VC_665_0  | 29 | 0.9121 | 1          | 0.9121 | 0 | 0 | 0 | 1 Ref      |
| MG592553 | Unassigned | Unassigned | Unassigned | 511_16 | Clustered/Singleton | 1 VC_511_16  | 1  | 0      | 1          | 0      | 0 | 0 | 0 | 1 Ref      |
| MG592554 | Unassigned | Unassigned | Unassigned | 1133_0 | Clustered           | 6 VC_1133_0  | 6  | 0.9291 | 0.99999982 | 0.9291 | 0 | 0 | 0 | 1 Ref      |
| MG592555 | Unassigned | Unassigned | Unassigned | 1133_0 | Clustered           | 6 VC_1133_0  | 6  | 0.9291 | 0.99999982 | 0.9291 | 0 | 0 | 0 | 1 Ref      |
| MG592556 | Unassigned | Unassigned | Unassigned | 1133_0 | Clustered           | 6 VC_1133_0  | 6  | 0.9291 | 0.99999982 | 0.9291 | 0 | 0 | 0 | 1 Ref      |
| MG592557 | Unassigned | Unassigned | Unassigned | 957_0  | Clustered           | 34 VC_957_0  | 34 | 0.8934 | 1          | 0.8934 | 0 | 0 | 0 | 0.9768 Ref |
| MG592558 | Unassigned | Unassigned | Unassigned | 957_0  | Clustered           | 34 VC_957_0  | 34 | 0.8934 | 1          | 0.8934 | 0 | 0 | 0 | 0.9768 Ref |
| MG592559 | Unassigned | Unassigned | Unassigned | 957_0  | Clustered           | 34 VC_957_0  | 34 | 0.8934 | 1          | 0.8934 | 0 | 0 | 0 | 0.9768 Ref |
| MG592560 | Unassigned | Unassigned | Unassigned | 1280_0 | Clustered           | 2 VC_1280_0  | 2  | 0.6481 | 0.86822376 | 0.5627 | 0 | 0 | 0 | 1 Ref      |
| MG592561 | Unassigned | Unassigned | Unassigned | 516_0  | Clustered           | 24 VC_516_0  | 24 | 0.8556 | 1          | 0.8556 | 0 | 0 | 0 | 0.9493 Ref |
| MG592562 | Unassigned | Unassigned | Unassigned | 511_1  | Clustered/Singleton | 1 VC_511_1   | 1  | 0      | 1          | 0      | 0 | 0 | 0 | 1 Ref      |
| MG592563 | Unassigned | Unassigned | Unassigned | 1091_0 | Clustered           | 24 VC_1091_0 | 24 | 0.5254 | 1          | 0.5254 | 0 | 0 | 0 | 1 Ref      |
| MG592564 | Unassigned | Unassigned | Unassigned | 1091_0 | Clustered           | 24 VC_1091_0 | 24 | 0.5254 | 1          | 0.5254 | 0 | 0 | 0 | 1 Ref      |
| MG592565 | Unassigned | Unassigned | Unassigned | 1091_0 | Clustered           | 24 VC_1091_0 | 24 | 0.5254 | 1          | 0.5254 | 0 | 0 | 0 | 1 Ref      |
| MG592566 | Unassigned | Unassigned | Unassigned | 981_0  | Clustered           | 9 VC_981_0   | 9  | 0.5418 | 1          | 0.5418 | 0 | 0 | 0 | 1 Ref      |
| MG592567 | Unassigned | Unassigned | Unassigned | 661_0  | Clustered           | 7 VC_661_0   | 7  | 0.15   | 1          | 0.15   | 0 | 0 | 0 | 0.7619 Ref |
| MG592568 | Unassigned | Unassigned | Unassigned | 661_0  | Clustered           | 7 VC_661_0   | 7  | 0.15   | 1          | 0.15   | 0 | 0 | 0 | 0.7619 Ref |
| MG592569 | Unassigned | Unassigned | Unassigned | 665_0  | Clustered           | 29 VC_665_0  | 29 | 0.9121 | 1          | 0.9121 | 0 | 0 | 0 | 1 Ref      |
| MG592570 | Unassigned | Unassigned | Unassigned | 665_0  | Clustered           | 29 VC_665_0  | 29 | 0.9121 | 1          | 0.9121 | 0 | 0 | 0 | 1 Ref      |
| MG592571 | Unassigned | Unassigned | Unassigned | 1091_0 | Clustered           | 24 VC_1091_0 | 24 | 0.5254 | 1          | 0.5254 | 0 | 0 | 0 | 1 Ref      |
| MG592572 | Unassigned | Unassigned | Unassigned | 516_0  | Clustered           | 24 VC_516_0  | 24 | 0.8556 | 1          | 0.8556 | 0 | 0 | 0 | 0.9493 Ref |
| MG592573 | Unassigned | Unassigned | Unassigned | 5_0    | Clustered           | 27 VC_5_0    | 27 | 0.9599 | 1          | 0.9599 | 0 | 0 | 0 | 1 Ref      |
| MG592576 | Unassigned | Unassigned | Unassigned | 957_0  | Clustered           | 34 VC_957_0  | 34 | 0.8934 | 1          | 0.8934 | 0 | 0 | 0 | 0.9768 Ref |
| MG592578 | Unassigned | Unassigned | Unassigned | 181_0  | Clustered           | 4 VC_181_0   | 4  | 0.3817 | 0.99998259 | 0.3817 | 0 | 0 | 0 | 1 Ref      |
| MG592579 | Unassigned | Unassigned | Unassigned | 563_0  | Clustered           | 6 VC_563_0   | 6  | 0.8633 | 0.99999948 | 0.8633 | 0 | 0 | 0 | 1 Ref      |
| MG592581 | Unassigned | Unassigned | Unassigned | 831_0  | Clustered           | 17 VC_831_0  | 17 | 0.9057 | 1          | 0.9057 | 0 | 0 | 0 | 1 Ref      |
| MG592582 | Unassigned | Unassigned | Unassigned | 831_0  | Clustered           | 17 VC_831_0  | 17 | 0.9057 | 1          | 0.9057 | 0 | 0 | 0 | 1 Ref      |
| MG592583 | Unassigned | Unassigned | Unassigned | 661_3  | Clustered           | 9 VC_661_3   | 9  | 0.2124 | 1          | 0.2124 | 0 | 0 | 0 | 0.6944 Ref |
| MG592584 | Unassigned | Unassigned | Unassigned | 978_0  | Clustered           | 6 VC_978_0   | 6  | 0.8163 | 1          | 0.8163 | 0 | 0 | 0 | 1 Ref      |
| MG592585 | Unassigned | Unassigned | Unassigned | 935_0  | Clustered           | 6 VC_935_0   | 6  | 0.2317 | 1          | 0.2317 | 0 | 0 | 0 | 1 Ref      |
| MG592586 | Unassigned | Unassigned | Unassigned | 935_0  | Clustered           | 6 VC_935_0   | 6  | 0.2317 | 1          | 0.2317 | 0 | 0 | 0 | 1 Ref      |
| MG592587 | Unassigned | Unassigned | Unassigned | 661_3  | Clustered           | 9 VC_661_3   | 9  | 0.2124 | 1          | 0.2124 | 0 | 0 | 0 | 0.6944 Ref |
| MG592588 | Unassigned | Unassigned | Unassigned | 255_0  | Clustered           | 11 VC_255_0  | 11 | 0.7034 | 1          | 0.7034 | 0 | 0 | 0 | 1 Ref      |
| MG592589 | Unassigned | Unassigned | Unassigned | 255_0  | Clustered           | 11 VC_255_0  | 11 | 0.7034 | 1          | 0.7034 | 0 | 0 | 0 | 1 Ref      |
| MG592590 | Unassigned | Unassigned | Unassigned | 516_0  | Clustered           | 24 VC_516_0  | 24 | 0.8556 | 1          | 0.8556 | 0 | 0 | 0 | 0.9493 Ref |
| MG592591 | Unassigned | Unassigned | Unassigned | 1133_0 | Clustered           | 6 VC_1133_0  | 6  | 0.9291 | 0.99999982 | 0.9291 | 0 | 0 | 0 | 1 Ref      |
| MG592592 | Unassigned | Unassigned | Unassigned | 516_0  | Clustered           | 24 VC_516_0  | 24 | 0.8556 | 1          | 0.8556 | 0 | 0 | 0 | 0.9493 Ref |
| MG592593 | Unassigned | Unassigned | Unassigned | 957_0  | Clustered           | 34 VC_957_0  | 34 | 0.8934 | 1          | 0.8934 | 0 | 0 | 0 | 0.9768 Ref |
| MG592594 | Unassigned | Unassigned | Unassigned | 957_0  | Clustered           | 34 VC_957_0  | 34 | 0.8934 | 1          | 0.8934 | 0 | 0 | 0 | 0.9768 Ref |
| MG592595 | Unassigned | Unassigned | Unassigned | 661_3  | Clustered           | 9 VC_661_3   | 9  | 0.2124 | 1          | 0.2124 | 0 | 0 | 0 | 0.6944 Ref |
| MG592596 | Unassigned | Unassigned | Unassigned | 1282_0 | Clustered           | 7 VC_1282_0  | 7  | 0.992  | 0.99999987 | 0.992  | 0 | 0 | 0 | 1 Ref      |
| MG592597 | Unassigned | Unassigned | Unassigned | 957_0  | Clustered           | 34 VC_957_0  | 34 | 0.8934 | 1          | 0.8934 | 0 | 0 | 0 | 0.9768 Ref |
| MG592598 | Unassigned | Unassigned | Unassigned | 957_0  | Clustered           | 34 VC_957_0  | 34 | 0.8934 | 1          | 0.8934 | 0 | 0 | 0 | 0.9768 Ref |
| MG592599 | Unassigned | Unassigned | Unassigned | 774_0  | Clustered           | 2 VC_774_0   | 2  | 0.0723 | 0.95532983 | 0.0691 | 0 | 0 | 0 | 1 Ref      |
| MG592600 | Unassigned | Unassigned | Unassigned | 661_0  | Clustered           | 7 VC_661_0   | 7  | 0.15   | 1          | 0.15   | 0 | 0 | 0 | 0.7619 Ref |
| MG592601 | Unassigned | Unassigned | Unassigned | 1091_1 | Clustered           | 29 VC_1091_1 | 29 | 0.4856 | 1          | 0.4856 | 0 | 0 | 0 | 0.9581 Ref |
| MG592602 | Unassigned | Unassigned | Unassigned | 1091_1 | Clustered           | 29 VC_1091_1 | 29 | 0.4856 | 1          | 0.4856 | 0 | 0 | 0 | 0.9581 Ref |
| MG592603 | Unassigned | Unassigned | Unassigned | 804_0  | Clustered           | 3 VC_804_0   | 3  | 0.2887 | 0.99856687 | 0.2883 | 0 | 0 | 0 | 1 Ref      |
| MG592604 | Unassigned | Unassigned | Unassigned | 804_0  | Clustered           | 3 VC_804_0   | 3  | 0.2887 | 0.99856687 | 0.2883 | 0 | 0 | 0 | 1 Ref      |
| MG592605 | Unassigned | Unassigned | Unassigned | 957_0  | Clustered           | 34 VC_957_0  | 34 | 0.8934 | 1          | 0.8934 | 0 | 0 | 0 | 0.9768 Ref |
| MG592606 | Unassigned | Unassigned | Unassigned | 957_0  | Clustered           | 34 VC_957_0  | 34 | 0.8934 | 1          | 0.8934 | 0 | 0 | 0 | 0.9768 Ref |
| MG592607 | Unassigned | Unassigned | Unassigned | 957_0  | Clustered           | 34 VC_957_0  | 34 | 0.8934 | 1          | 0.8934 | 0 | 0 | 0 | 0.9768 Ref |



|          |            |            |            |        |                     |               |     |        |            |        |   |   |   |            |
|----------|------------|------------|------------|--------|---------------------|---------------|-----|--------|------------|--------|---|---|---|------------|
| MG592608 | Unassigned | Unassigned | Unassigned | 665_0  | Clustered           | 29 VC_665_0   | 29  | 0.9121 | 1          | 0.9121 | 0 | 0 | 0 | 1 Ref      |
| MG592609 | Unassigned | Unassigned | Unassigned | 137_0  | Clustered           | 2 VC_137_0    | 2   | 0.0296 | 0.95557467 | 0.0283 | 0 | 0 | 0 | 1 Ref      |
| MG592610 | Unassigned | Unassigned | Unassigned | 804_0  | Clustered           | 3 VC_804_0    | 3   | 0.2887 | 0.99856687 | 0.2883 | 0 | 0 | 0 | 1 Ref      |
| MG592611 | Unassigned | Unassigned | Unassigned | 516_0  | Clustered           | 24 VC_516_0   | 24  | 0.8556 | 1          | 0.8556 | 0 | 0 | 0 | 0.9493 Ref |
| MG592612 | Unassigned | Unassigned | Unassigned | 978_0  | Clustered           | 6 VC_978_0    | 6   | 0.8163 | 1          | 0.8163 | 0 | 0 | 0 | 1 Ref      |
| MG592613 | Unassigned | Unassigned | Unassigned | 978_0  | Clustered           | 6 VC_978_0    | 6   | 0.8163 | 1          | 0.8163 | 0 | 0 | 0 | 1 Ref      |
| MG592614 | Unassigned | Unassigned | Unassigned | 665_0  | Clustered           | 29 VC_665_0   | 29  | 0.9121 | 1          | 0.9121 | 0 | 0 | 0 | 1 Ref      |
| MG592617 | Unassigned | Unassigned | Unassigned | 1091_1 | Clustered           | 29 VC_1091_1  | 29  | 0.4856 | 1          | 0.4856 | 0 | 0 | 0 | 0.9581 Ref |
| MG592618 | Unassigned | Unassigned | Unassigned | 1091_1 | Clustered           | 29 VC_1091_1  | 29  | 0.4856 | 1          | 0.4856 | 0 | 0 | 0 | 0.9581 Ref |
| MG592619 | Unassigned | Unassigned | Unassigned | 774_0  | Clustered           | 2 VC_774_0    | 2   | 0.0723 | 0.95532983 | 0.0691 | 0 | 0 | 0 | 1 Ref      |
| MG592620 | Unassigned | Unassigned | Unassigned | 518_0  | Clustered           | 16 VC_518_0   | 16  | 0.9983 | 1          | 0.9983 | 0 | 0 | 0 | 1 Ref      |
| MG592621 | Unassigned | Unassigned | Unassigned | 137_0  | Clustered           | 2 VC_137_0    | 2   | 0.0296 | 0.95557467 | 0.0283 | 0 | 0 | 0 | 1 Ref      |
| MG592622 | Unassigned | Unassigned | Unassigned | 665_0  | Clustered           | 29 VC_665_0   | 29  | 0.9121 | 1          | 0.9121 | 0 | 0 | 0 | 1 Ref      |
| MG592623 | Unassigned | Unassigned | Unassigned | 518_0  | Clustered           | 16 VC_518_0   | 16  | 0.9983 | 1          | 0.9983 | 0 | 0 | 0 | 1 Ref      |
| MG592625 | Unassigned | Unassigned | Unassigned | 1133_0 | Clustered           | 6 VC_1133_0   | 6   | 0.9291 | 0.99999982 | 0.9291 | 0 | 0 | 0 | 1 Ref      |
| MG592626 | Unassigned | Unassigned | Unassigned | 548_0  | Clustered           | 9 VC_548_0    | 9   | 0.8018 | 1          | 0.8018 | 0 | 0 | 0 | 1 Ref      |
| MG592627 | Unassigned | Unassigned | Unassigned | 665_0  | Clustered           | 29 VC_665_0   | 29  | 0.9121 | 1          | 0.9121 | 0 | 0 | 0 | 1 Ref      |
| MG592628 | Unassigned | Unassigned | Unassigned | 665_0  | Clustered           | 29 VC_665_0   | 29  | 0.9121 | 1          | 0.9121 | 0 | 0 | 0 | 1 Ref      |
| MG592629 | Unassigned | Unassigned | Unassigned | 775_0  | Clustered           | 18 VC_775_0   | 18  | 0.7364 | 1          | 0.7364 | 0 | 0 | 0 | 1 Ref      |
| MG592630 | Unassigned | Unassigned | Unassigned | 661_0  | Clustered           | 7 VC_661_0    | 7   | 0.15   | 1          | 0.15   | 0 | 0 | 0 | 0.7619 Ref |
| MG592631 | Unassigned | Unassigned | Unassigned | 957_0  | Clustered           | 34 VC_957_0   | 34  | 0.8934 | 1          | 0.8934 | 0 | 0 | 0 | 0.9768 Ref |
| MG592632 | Unassigned | Unassigned | Unassigned | 1091_0 | Clustered           | 24 VC_1091_0  | 24  | 0.5254 | 1          | 0.5254 | 0 | 0 | 0 | 1 Ref      |
| MG592633 | Unassigned | Unassigned | Unassigned | 1091_0 | Clustered           | 24 VC_1091_0  | 24  | 0.5254 | 1          | 0.5254 | 0 | 0 | 0 | 1 Ref      |
| MG592634 | Unassigned | Unassigned | Unassigned | 1091_0 | Clustered           | 24 VC_1091_0  | 24  | 0.5254 | 1          | 0.5254 | 0 | 0 | 0 | 1 Ref      |
| MG592635 | Unassigned | Unassigned | Unassigned | 1091_0 | Clustered           | 24 VC_1091_0  | 24  | 0.5254 | 1          | 0.5254 | 0 | 0 | 0 | 1 Ref      |
| MG592636 | Unassigned | Unassigned | Unassigned | 1091_0 | Clustered           | 24 VC_1091_0  | 24  | 0.5254 | 1          | 0.5254 | 0 | 0 | 0 | 1 Ref      |
| MG592637 | Unassigned | Unassigned | Unassigned | 1091_0 | Clustered           | 24 VC_1091_0  | 24  | 0.5254 | 1          | 0.5254 | 0 | 0 | 0 | 1 Ref      |
| MG592638 | Unassigned | Unassigned | Unassigned | 1091_0 | Clustered           | 24 VC_1091_0  | 24  | 0.5254 | 1          | 0.5254 | 0 | 0 | 0 | 1 Ref      |
| MG592639 | Unassigned | Unassigned | Unassigned | 1091_0 | Clustered           | 24 VC_1091_0  | 24  | 0.5254 | 1          | 0.5254 | 0 | 0 | 0 | 1 Ref      |
| MG592640 | Unassigned | Unassigned | Unassigned | 1091_0 | Clustered           | 24 VC_1091_0  | 24  | 0.5254 | 1          | 0.5254 | 0 | 0 | 0 | 1 Ref      |
| MG592641 | Unassigned | Unassigned | Unassigned | 665_0  | Clustered           | 29 VC_665_0   | 29  | 0.9121 | 1          | 0.9121 | 0 | 0 | 0 | 1 Ref      |
| MG592642 | Unassigned | Unassigned | Unassigned | 1091_0 | Clustered           | 24 VC_1091_0  | 24  | 0.5254 | 1          | 0.5254 | 0 | 0 | 0 | 1 Ref      |
| MG592644 | Unassigned | Unassigned | Unassigned | 661_3  | Clustered           | 9 VC_661_3    | 9   | 0.2124 | 1          | 0.2124 | 0 | 0 | 0 | 0.6944 Ref |
| MG592645 | Unassigned | Unassigned | Unassigned | 1091_0 | Clustered           | 24 VC_1091_0  | 24  | 0.5254 | 1          | 0.5254 | 0 | 0 | 0 | 1 Ref      |
| MG592646 | Unassigned | Unassigned | Unassigned | 1091_0 | Clustered           | 24 VC_1091_0  | 24  | 0.5254 | 1          | 0.5254 | 0 | 0 | 0 | 1 Ref      |
| MG592647 | Unassigned | Unassigned | Unassigned | 665_0  | Clustered           | 29 VC_665_0   | 29  | 0.9121 | 1          | 0.9121 | 0 | 0 | 0 | 1 Ref      |
| MG592648 | Unassigned | Unassigned | Unassigned | 1091_0 | Clustered           | 24 VC_1091_0  | 24  | 0.5254 | 1          | 0.5254 | 0 | 0 | 0 | 1 Ref      |
| MG592649 | Unassigned | Unassigned | Unassigned | 1091_0 | Clustered           | 24 VC_1091_0  | 24  | 0.5254 | 1          | 0.5254 | 0 | 0 | 0 | 1 Ref      |
| MG592650 | Unassigned | Unassigned | Unassigned | 1091_0 | Clustered           | 24 VC_1091_0  | 24  | 0.5254 | 1          | 0.5254 | 0 | 0 | 0 | 1 Ref      |
| MG592651 | Unassigned | Unassigned | Unassigned | 1091_0 | Clustered           | 24 VC_1091_0  | 24  | 0.5254 | 1          | 0.5254 | 0 | 0 | 0 | 1 Ref      |
| MG592652 | Unassigned | Unassigned | Unassigned | 1091_0 | Clustered           | 24 VC_1091_0  | 24  | 0.5254 | 1          | 0.5254 | 0 | 0 | 0 | 1 Ref      |
| MG592653 | Unassigned | Unassigned | Unassigned | 1091_0 | Clustered           | 24 VC_1091_0  | 24  | 0.5254 | 1          | 0.5254 | 0 | 0 | 0 | 1 Ref      |
| MG592654 | Unassigned | Unassigned | Unassigned | 981_0  | Clustered           | 9 VC_981_0    | 9   | 0.5418 | 1          | 0.5418 | 0 | 0 | 0 | 1 Ref      |
| MG592655 | Unassigned | Unassigned | Unassigned | 1091_1 | Clustered           | 29 VC_1091_1  | 29  | 0.4856 | 1          | 0.4856 | 0 | 0 | 0 | 0.9581 Ref |
| MG592656 | Unassigned | Unassigned | Unassigned | 665_0  | Clustered           | 29 VC_665_0   | 29  | 0.9121 | 1          | 0.9121 | 0 | 0 | 0 | 1 Ref      |
| MG592657 | Unassigned | Unassigned | Unassigned | 981_0  | Clustered           | 9 VC_981_0    | 9   | 0.5418 | 1          | 0.5418 | 0 | 0 | 0 | 1 Ref      |
| MG592658 | Unassigned | Unassigned | Unassigned | 981_0  | Clustered           | 9 VC_981_0    | 9   | 0.5418 | 1          | 0.5418 | 0 | 0 | 0 | 1 Ref      |
| MG592659 | Unassigned | Unassigned | Unassigned | 981_0  | Clustered           | 9 VC_981_0    | 9   | 0.5418 | 1          | 0.5418 | 0 | 0 | 0 | 1 Ref      |
| MG592660 | Unassigned | Unassigned | Unassigned | 181_0  | Clustered           | 4 VC_181_0    | 4   | 0.3817 | 0.99998259 | 0.3817 | 0 | 0 | 0 | 1 Ref      |
| MG592661 | Unassigned | Unassigned | Unassigned | 1081_0 | Clustered           | 9 VC_1081_0   | 9   | 0.6523 | 1          | 0.6523 | 0 | 0 | 0 | 1 Ref      |
| MG592662 | Unassigned | Unassigned | Unassigned | 933_0  | Clustered           | 3 VC_933_0    | 3   | 0.9964 | 0.94670842 | 0.9433 | 0 | 0 | 0 | 1 Ref      |
| MG592664 | Unassigned | Unassigned | Unassigned | 661_5  | Clustered           | 4 VC_661_5    | 4   | 0.0894 | 0.99996664 | 0.0894 | 0 | 0 | 0 | 1 Ref      |
| MG592665 | Unassigned | Unassigned | Unassigned | 661_5  | Clustered           | 4 VC_661_5    | 4   | 0.0894 | 0.99996664 | 0.0894 | 0 | 0 | 0 | 1 Ref      |
| MG592666 | Unassigned | Unassigned | Unassigned | 851_0  | Clustered           | 6 VC_851_0    | 6   | 0.7471 | 1          | 0.7471 | 0 | 0 | 0 | 1 Ref      |
| MG592668 | Unassigned | Unassigned | Unassigned | 809_0  | Clustered           | 7 VC_809_0    | 7   | 0.5153 | 1          | 0.5153 | 0 | 0 | 0 | 1 Ref      |
| MG592669 | Unassigned | Unassigned | Unassigned | 255_0  | Clustered           | 11 VC_255_0   | 11  | 0.7034 | 1          | 0.7034 | 0 | 0 | 0 | 1 Ref      |
| MG592670 | Unassigned | Unassigned | Unassigned | 255_0  | Clustered           | 11 VC_255_0   | 11  | 0.7034 | 1          | 0.7034 | 0 | 0 | 0 | 1 Ref      |
| MG592671 | Unassigned | Unassigned | Unassigned | 170_9  | Clustered/Singleton | 1 VC_170_9    | 1   | 0      | 1          | 0      | 0 | 0 | 0 | 1 Ref      |
| MG592672 | Unassigned | Unassigned | Unassigned | 933_0  | Clustered           | 3 VC_933_0    | 3   | 0.9964 | 0.94670842 | 0.9433 | 0 | 0 | 0 | 1 Ref      |
| MG593800 | Unassigned | Unassigned | Unassigned | 388_0  | Clustered           | 3 VC_388_0    | 3   | 0.2477 | 0.99807286 | 0.2473 | 0 | 0 | 0 | 1 Ref      |
| MG593802 | Unassigned | Unassigned | Unassigned | 1015_1 | Clustered           | 26 VC_1015_1  | 26  | 0.6989 | 1          | 0.6989 | 0 | 0 | 0 | 1 Ref      |
| MG593803 | Unassigned | Unassigned | Unassigned | 388_0  | Clustered           | 3 VC_388_0    | 3   | 0.2477 | 0.99807286 | 0.2473 | 0 | 0 | 0 | 1 Ref      |
| MG596799 | Unassigned | Unassigned | Unassigned | 1070_0 | Clustered           | 3 VC_1070_0   | 3   | 0.7872 | 0.99542416 | 0.7836 | 0 | 0 | 0 | 1 Ref      |
| MG596800 | Unassigned | Unassigned | Unassigned | 1000_0 | Clustered           | 2 VC_1000_0   | 2   | 0.2337 | 0.95692166 | 0.2237 | 0 | 0 | 0 | 1 Ref      |
| MG599035 | Unassigned | Unassigned | Unassigned | 714_0  | Clustered           | 71 VC_714_0   | 71  | 0.935  | 1          | 0.935  | 0 | 0 | 0 | 1 Ref      |
| MG602476 | Unassigned | Unassigned | Unassigned | 911_0  | Clustered           | 20 VC_911_0   | 20  | 0.9915 | 1          | 0.9915 | 0 | 0 | 0 | 1 Ref      |
| MG602477 | Unassigned | Unassigned | Unassigned | 195_3  | Clustered           | 9 VC_195_3    | 9   | 0.1955 | 1          | 0.1955 | 0 | 0 | 0 | 0.8611 Ref |
| MG640035 | Unassigned | Unassigned | Unassigned | 941_0  | Clustered           | 5 VC_941_0    | 5   | 0.7412 | 0.99999276 | 0.7412 | 0 | 0 | 0 | 1 Ref      |
| MG641179 | Unassigned | Unassigned | Unassigned | 1145_0 | Clustered           | 164 VC_1145_0 | 164 | 0.8868 | 1          | 0.8868 | 0 | 0 | 0 | 1 Ref      |
| MG641180 | Unassigned | Unassigned | Unassigned | 1145_0 | Clustered           | 164 VC_1145_0 | 164 | 0.8868 | 1          | 0.8868 | 0 | 0 | 0 | 1 Ref      |
| MG641183 | Unassigned | Unassigned | Unassigned | 205_0  | Clustered           | 5 VC_205_0    | 5   | 0.1325 | 0.84698401 | 0.1122 | 0 | 0 | 0 | 1 Ref      |
| MG641184 | Unassigned | Unassigned | Unassigned | 1174_0 | Clustered           | 4 VC_1174_0   | 4   | 0.1295 | 0.97665214 | 0.1265 | 0 | 0 | 0 | 1 Ref      |
| MG641185 | Unassigned | Unassigned | Unassigned | 1285_0 | Clustered           | 3 VC_1285_0   | 3   | 0.7418 | 0.80676188 | 0.5984 | 0 | 0 | 0 | 1 Ref      |
| MG641186 | Unassigned | Unassigned | Unassigned | 1145_0 | Clustered           | 164 VC_1145_0 | 164 | 0.8868 | 1          | 0.8868 | 0 | 0 | 0 | 1 Ref      |
| MG641188 | Unassigned | Unassigned | Unassigned | 1286_0 | Clustered           | 16 VC_1286_0  | 16  | 0.9448 | 1          | 0.9448 | 0 | 0 | 0 | 1 Ref      |
| MG646668 | Unassigned | Unassigned | Unassigned | 654_0  | Clustered           | 115 VC_654_0  | 115 | 0.7303 | 1          | 0.7303 | 0 | 0 | 0 | 0.8764 Ref |
| MG646669 | Unassigned | Unassigned | Unassigned | 340_11 | Clustered           | 15 VC_340_11  | 15  | 0.079  | 1          | 0.079  | 0 | 0 | 0 | 0.9333 Ref |
| MG646670 | Unassigned | Unassigned | Unassigned | 340_11 | Clustered           | 15 VC_340_11  | 15  | 0.079  | 1          | 0.079  | 0 | 0 | 0 | 0.9333 Ref |
| MG646671 | Unassigned | Unassigned | Unassigned | 340_11 | Clustered           | 15 VC_340_11  | 15  | 0.079  | 1          | 0.079  | 0 | 0 | 0 | 0.9333 Ref |
| MG646672 | Unassigned | Unassigned | Unassigned | 340_0  | Clustered           | 2 VC_340_0    | 2   | 0.0051 | 0.9546458  | 0.0048 | 0 | 0 | 0 | 1 Ref      |
| MG649966 | Unassigned | Unassigned | Unassigned | 1007_1 | Clustered           | 24 VC_1007_1  | 24  | 0.7364 | 1          | 0.7364 | 0 | 0 | 0 | 0.8877 Ref |



|          |            |            |            |        |                     |              |     |        |            |        |   |   |   |        |     |
|----------|------------|------------|------------|--------|---------------------|--------------|-----|--------|------------|--------|---|---|---|--------|-----|
| MG649967 | Unassigned | Unassigned | Unassigned | 1007_1 | Clustered           | 24 VC_1007_1 | 24  | 0.7364 | 1          | 0.7364 | 0 | 0 | 0 | 0.8877 | Ref |
| MG655267 | Unassigned | Unassigned | Unassigned | 507_1  | Clustered           | 11 VC_507_1  | 11  | 0.4612 | 1          | 0.4612 | 0 | 0 | 0 | 1      | Ref |
| MG655268 | Unassigned | Unassigned | Unassigned | 507_1  | Clustered           | 11 VC_507_1  | 11  | 0.4612 | 1          | 0.4612 | 0 | 0 | 0 | 1      | Ref |
| MG655269 | Unassigned | Unassigned | Unassigned | 507_1  | Clustered           | 11 VC_507_1  | 11  | 0.4612 | 1          | 0.4612 | 0 | 0 | 0 | 1      | Ref |
| MG655270 | Unassigned | Unassigned | Unassigned | 507_1  | Clustered           | 11 VC_507_1  | 11  | 0.4612 | 1          | 0.4612 | 0 | 0 | 0 | 1      | Ref |
| MG656408 | Unassigned | Unassigned | Unassigned | 155_8  | Clustered           | 66 VC_155_8  | 66  | 0.4537 | 1          | 0.4537 | 0 | 0 | 0 | 0.8182 | Ref |
| MG663582 | Unassigned | Unassigned | Unassigned | 1278_0 | Clustered           | 19 VC_1278_0 | 19  | 1      | 1          | 1      | 0 | 0 | 0 | 1      | Ref |
| MG663583 | Unassigned | Unassigned | Unassigned | 1278_0 | Clustered           | 19 VC_1278_0 | 19  | 1      | 1          | 1      | 0 | 0 | 0 | 1      | Ref |
| MG663584 | Unassigned | Unassigned | Unassigned | 1278_0 | Clustered           | 19 VC_1278_0 | 19  | 1      | 1          | 1      | 0 | 0 | 0 | 1      | Ref |
| MG663585 | Unassigned | Unassigned | Unassigned | 1278_0 | Clustered           | 19 VC_1278_0 | 19  | 1      | 1          | 1      | 0 | 0 | 0 | 1      | Ref |
| MG663586 | Unassigned | Unassigned | Unassigned | 1278_0 | Clustered           | 19 VC_1278_0 | 19  | 1      | 1          | 1      | 0 | 0 | 0 | 1      | Ref |
| MG670586 | Unassigned | Unassigned | Unassigned | 1287_0 | Clustered           | 44 VC_1287_0 | 44  | 1      | 1          | 1      | 0 | 0 | 0 | 1      | Ref |
| MG673519 | Unassigned | Unassigned | Unassigned | 837_1  | Clustered           | 24 VC_837_1  | 24  | 0.5328 | 1          | 0.5328 | 0 | 0 | 0 | 1      | Ref |
| MG674163 | Unassigned | Unassigned | Unassigned | 628_0  | Clustered           | 5 VC_628_0   | 5   | 0.4297 | 0.99999996 | 0.4297 | 0 | 0 | 0 | 1      | Ref |
| MG676223 | Unassigned | Unassigned | Unassigned | 661_2  | Clustered           | 6 VC_661_2   | 6   | 0.1674 | 1          | 0.1674 | 0 | 0 | 0 | 1      | Ref |
| MG676224 | Unassigned | Unassigned | Unassigned | 203_0  | Clustered           | 2 VC_203_0   | 2   | 0.117  | 0.95681582 | 0.112  | 0 | 0 | 0 | 1      | Ref |
| MG676225 | Unassigned | Unassigned | Unassigned | 203_0  | Clustered           | 2 VC_203_0   | 2   | 0.117  | 0.95681582 | 0.112  | 0 | 0 | 0 | 1      | Ref |
| MG676466 | Unassigned | Unassigned | Unassigned | 772_0  | Clustered           | 9 VC_772_0   | 9   | 0.4468 | 1          | 0.4468 | 0 | 0 | 0 | 1      | Ref |
| MG696114 | Unassigned | Unassigned | Unassigned | 295_2  | Clustered           | 2 VC_295_2   | 2   | 0.0224 | 0.95539992 | 0.0214 | 0 | 0 | 0 | 1      | Ref |
| MG707188 | Unassigned | Unassigned | Unassigned | 179_0  | Clustered           | 2 VC_179_0   | 2   | 0.0795 | 0.95489091 | 0.0759 | 0 | 0 | 0 | 1      | Ref |
| MG708273 | Unassigned | Unassigned | Unassigned | 258_0  | Clustered           | 121 VC_258_0 | 121 | 0.7359 | 1          | 0.7359 | 0 | 0 | 0 | 0.9999 | Ref |
| MG708274 | Unassigned | Unassigned | Unassigned | 258_0  | Clustered           | 121 VC_258_0 | 121 | 0.7359 | 1          | 0.7359 | 0 | 0 | 0 | 0.9999 | Ref |
| MG708275 | Unassigned | Unassigned | Unassigned | 258_0  | Clustered           | 121 VC_258_0 | 121 | 0.7359 | 1          | 0.7359 | 0 | 0 | 0 | 0.9999 | Ref |
| MG708276 | Unassigned | Unassigned | Unassigned | 711_0  | Clustered           | 48 VC_711_0  | 48  | 0.8217 | 1          | 0.8217 | 0 | 0 | 0 | 1      | Ref |
| MG710528 | Unassigned | Unassigned | Unassigned | 44_0   | Clustered           | 49 VC_44_0   | 49  | 0.4506 | 1          | 0.4506 | 0 | 0 | 0 | 0.8605 | Ref |
| MG711460 | Unassigned | Unassigned | Unassigned | 1288_0 | Clustered           | 7 VC_1288_0  | 7   | 0.9846 | 0.99997693 | 0.9846 | 0 | 0 | 0 | 1      | Ref |
| MG711461 | Unassigned | Unassigned | Unassigned | 727_0  | Clustered           | 8 VC_727_0   | 8   | 0.6106 | 1          | 0.6106 | 0 | 0 | 0 | 0.9286 | Ref |
| MG711462 | Unassigned | Unassigned | Unassigned | 723_0  | Clustered           | 20 VC_723_0  | 20  | 0.7344 | 1          | 0.7344 | 0 | 0 | 0 | 0.7    | Ref |
| MG711466 | Unassigned | Unassigned | Unassigned | 728_0  | Clustered           | 7 VC_728_0   | 7   | 0.2344 | 1          | 0.2344 | 0 | 0 | 0 | 0.8095 | Ref |
| MG720309 | Unassigned | Unassigned | Unassigned | 935_0  | Clustered           | 6 VC_935_0   | 6   | 0.2317 | 1          | 0.2317 | 0 | 0 | 0 | 1      | Ref |
| MG721208 | Unassigned | Unassigned | Unassigned | 155_21 | Clustered/Singleton | 1 VC_155_21  | 1   | 0      | 1          | 0      | 0 | 0 | 0 | 1      | Ref |
| MG727695 | Unassigned | Unassigned | Unassigned | 725_0  | Clustered           | 47 VC_725_0  | 47  | 0.8649 | 1          | 0.8649 | 0 | 0 | 0 | 1      | Ref |
| MG727696 | Unassigned | Unassigned | Unassigned | 725_0  | Clustered           | 47 VC_725_0  | 47  | 0.8649 | 1          | 0.8649 | 0 | 0 | 0 | 1      | Ref |
| MG727698 | Unassigned | Unassigned | Unassigned | 725_0  | Clustered           | 47 VC_725_0  | 47  | 0.8649 | 1          | 0.8649 | 0 | 0 | 0 | 1      | Ref |
| MG727699 | Unassigned | Unassigned | Unassigned | 725_0  | Clustered           | 47 VC_725_0  | 47  | 0.8649 | 1          | 0.8649 | 0 | 0 | 0 | 1      | Ref |
| MG727700 | Unassigned | Unassigned | Unassigned | 725_0  | Clustered           | 47 VC_725_0  | 47  | 0.8649 | 1          | 0.8649 | 0 | 0 | 0 | 1      | Ref |
| MG727701 | Unassigned | Unassigned | Unassigned | 725_0  | Clustered           | 47 VC_725_0  | 47  | 0.8649 | 1          | 0.8649 | 0 | 0 | 0 | 1      | Ref |
| MG727702 | Unassigned | Unassigned | Unassigned | 725_0  | Clustered           | 47 VC_725_0  | 47  | 0.8649 | 1          | 0.8649 | 0 | 0 | 0 | 1      | Ref |
| MG736918 | Unassigned | Unassigned | Unassigned | 467_0  | Clustered           | 6 VC_467_0   | 6   | 0.1136 | 1          | 0.1136 | 0 | 0 | 0 | 1      | Ref |
| MG744354 | Unassigned | Unassigned | Unassigned | 650_1  | Clustered           | 6 VC_650_1   | 6   | 0.4186 | 1          | 0.4186 | 0 | 0 | 0 | 1      | Ref |
| MG747435 | Unassigned | Unassigned | Unassigned | 1_0    | Clustered           | 54 VC_1_0    | 54  | 0.8518 | 1          | 0.8518 | 0 | 0 | 0 | 1      | Ref |
| MG748547 | Unassigned | Unassigned | Unassigned | 135_5  | Clustered/Singleton | 1 VC_135_5   | 1   | 0      | 1          | 0      | 0 | 0 | 0 | 1      | Ref |
| MG748548 | Unassigned | Unassigned | Unassigned | 837_1  | Clustered           | 24 VC_837_1  | 24  | 0.5328 | 1          | 0.5328 | 0 | 0 | 0 | 1      | Ref |
| MG751100 | Unassigned | Unassigned | Unassigned | 509_0  | Clustered           | 36 VC_509_0  | 36  | 0.5291 | 1          | 0.5291 | 0 | 0 | 0 | 0.9714 | Ref |
| MG757152 | Unassigned | Unassigned | Unassigned | 895_0  | Clustered           | 25 VC_895_0  | 25  | 0.5768 | 1          | 0.5768 | 0 | 0 | 0 | 1      | Ref |
| MG757153 | Unassigned | Unassigned | Unassigned | 1115_0 | Clustered           | 2 VC_1115_0  | 2   | 0.0262 | 0.95117088 | 0.0249 | 0 | 0 | 0 | 1      | Ref |
| MG757154 | Unassigned | Unassigned | Unassigned | 901_0  | Clustered           | 31 VC_901_0  | 31  | 0.8235 | 1          | 0.8235 | 0 | 0 | 0 | 0.8194 | Ref |
| MG757155 | Unassigned | Unassigned | Unassigned | 895_0  | Clustered           | 25 VC_895_0  | 25  | 0.5768 | 1          | 0.5768 | 0 | 0 | 0 | 1      | Ref |
| MG757156 | Unassigned | Unassigned | Unassigned | 591_0  | Clustered           | 4 VC_591_0   | 4   | 0.1897 | 0.9999859  | 0.1897 | 0 | 0 | 0 | 1      | Ref |
| MG757157 | Unassigned | Unassigned | Unassigned | 789_0  | Clustered           | 34 VC_789_0  | 34  | 0.9167 | 1          | 0.9167 | 0 | 0 | 0 | 1      | Ref |
| MG757158 | Unassigned | Unassigned | Unassigned | 384_16 | Clustered           | 42 VC_384_16 | 42  | 0.134  | 1          | 0.134  | 0 | 0 | 0 | 0.7282 | Ref |
| MG757159 | Unassigned | Unassigned | Unassigned | 384_11 | Clustered           | 31 VC_384_11 | 31  | 0.0926 | 1          | 0.0926 | 0 | 0 | 0 | 0.7011 | Ref |
| MG757160 | Unassigned | Unassigned | Unassigned | 571_6  | Clustered           | 22 VC_571_6  | 22  | 0.1207 | 1          | 0.1207 | 0 | 0 | 0 | 0.8095 | Ref |
| MG757161 | Unassigned | Unassigned | Unassigned | 532_0  | Clustered           | 75 VC_532_0  | 75  | 0.9393 | 1          | 0.9393 | 0 | 0 | 0 | 1      | Ref |
| MG757162 | Unassigned | Unassigned | Unassigned | 526_0  | Clustered           | 32 VC_526_0  | 32  | 0.9037 | 1          | 0.9037 | 0 | 0 | 0 | 1      | Ref |
| MG757163 | Unassigned | Unassigned | Unassigned | 1016_0 | Clustered           | 62 VC_1016_0 | 62  | 0.8638 | 1          | 0.8638 | 0 | 0 | 0 | 0.743  | Ref |
| MG757164 | Unassigned | Unassigned | Unassigned | 384_13 | Clustered           | 33 VC_384_13 | 33  | 0.1785 | 1          | 0.1785 | 0 | 0 | 0 | 0.8769 | Ref |
| MG757165 | Unassigned | Unassigned | Unassigned | 384_13 | Clustered           | 33 VC_384_13 | 33  | 0.1785 | 1          | 0.1785 | 0 | 0 | 0 | 0.8769 | Ref |
| MG757166 | Unassigned | Unassigned | Unassigned | 789_0  | Clustered           | 34 VC_789_0  | 34  | 0.9167 | 1          | 0.9167 | 0 | 0 | 0 | 1      | Ref |
| MG757167 | Unassigned | Unassigned | Unassigned | 973_0  | Clustered           | 15 VC_973_0  | 15  | 1      | 0          | 0      | 0 | 0 | 0 | 1      | Ref |
| MG763894 | Unassigned | Unassigned | Unassigned | 913_0  | Clustered           | 28 VC_913_0  | 28  | 0.6206 | 1          | 0.6206 | 0 | 0 | 0 | 0.9841 | Ref |
| MG765274 | Unassigned | Unassigned | Unassigned | 650_1  | Clustered           | 6 VC_650_1   | 6   | 0.4186 | 1          | 0.4186 | 0 | 0 | 0 | 1      | Ref |
| MG765275 | Unassigned | Unassigned | Unassigned | 597_0  | Clustered           | 6 VC_597_0   | 6   | 0.9222 | 0.99999993 | 0.9222 | 0 | 0 | 0 | 1      | Ref |
| MG765276 | Unassigned | Unassigned | Unassigned | 650_0  | Clustered           | 3 VC_650_0   | 3   | 0.2008 | 0.99838296 | 0.2005 | 0 | 0 | 0 | 1      | Ref |
| MG765277 | Unassigned | Unassigned | Unassigned | 544_0  | Clustered           | 6 VC_544_0   | 6   | 0.4346 | 1          | 0.4346 | 0 | 0 | 0 | 1      | Ref |
| MG765278 | Unassigned | Unassigned | Unassigned | 597_0  | Clustered           | 6 VC_597_0   | 6   | 0.9222 | 0.99999993 | 0.9222 | 0 | 0 | 0 | 1      | Ref |
| MG765279 | Unassigned | Unassigned | Unassigned | 544_0  | Clustered           | 6 VC_544_0   | 6   | 0.4346 | 1          | 0.4346 | 0 | 0 | 0 | 1      | Ref |
| MG766218 | Unassigned | Unassigned | Unassigned | 98_0   | Clustered           | 30 VC_98_0   | 30  | 0.7175 | 1          | 0.7175 | 0 | 0 | 0 | 1      | Ref |
| MG766219 | Unassigned | Unassigned | Unassigned | 98_0   | Clustered           | 30 VC_98_0   | 30  | 0.7175 | 1          | 0.7175 | 0 | 0 | 0 | 1      | Ref |
| MG770211 | Unassigned | Unassigned | Unassigned | 895_0  | Clustered           | 25 VC_895_0  | 25  | 0.5768 | 1          | 0.5768 | 0 | 0 | 0 | 1      | Ref |
| MG770212 | Unassigned | Unassigned | Unassigned | 384_15 | Clustered           | 44 VC_384_15 | 44  | 0.139  | 1          | 0.139  | 0 | 0 | 0 | 0.7474 | Ref |
| MG770214 | Unassigned | Unassigned | Unassigned | 895_0  | Clustered           | 25 VC_895_0  | 25  | 0.5768 | 1          | 0.5768 | 0 | 0 | 0 | 1      | Ref |
| MG770215 | Unassigned | Unassigned | Unassigned | 952_0  | Clustered           | 39 VC_952_0  | 39  | 0.9064 | 1          | 0.9064 | 0 | 0 | 0 | 1      | Ref |
| MG770216 | Unassigned | Unassigned | Unassigned | 833_0  | Clustered           | 2 VC_833_0   | 2   | 0.1786 | 0.96299906 | 0.172  | 0 | 0 | 0 | 1      | Ref |
| MG770228 | Unassigned | Unassigned | Unassigned | 801_0  | Clustered           | 37 VC_801_0  | 37  | 0.5672 | 1          | 0.5672 | 0 | 0 | 0 | 1      | Ref |
| MG770379 | Unassigned | Unassigned | Unassigned | 134_2  | Clustered           | 17 VC_134_2  | 17  | 0.1715 | 1          | 0.1715 | 0 | 0 | 0 | 0.9853 | Ref |
| MG770897 | Unassigned | Unassigned | Unassigned | 8_0    | Clustered           | 58 VC_8_0    | 58  | 0.8285 | 1          | 0.8285 | 0 | 0 | 0 | 0.9946 | Ref |
| MG775042 | Unassigned | Unassigned | Unassigned | 466_0  | Clustered           | 66 VC_466_0  | 66  | 0.9246 | 1          | 0.9246 | 0 | 0 | 0 | 1      | Ref |
| MG775043 | Unassigned | Unassigned | Unassigned | 290_24 | Clustered/Singleton | 1 VC_290_24  | 1   | 0      | 1          | 0      | 0 | 0 | 0 | 1      | Ref |
| MG775258 | Unassigned | Unassigned | Unassigned | 131_0  | Clustered           | 43 VC_131_0  | 43  | 0.8853 | 1          | 0.8853 | 0 | 0 | 0 | 1      | Ref |
| MG775260 | Unassigned | Unassigned | Unassigned | 866_0  | Clustered           | 2 VC_866_0   | 2   | 0.0566 | 0.95560116 | 0.0541 | 0 | 0 | 0 | 1      | Ref |



|          |            |            |            |         |                     |               |     |        |            |        |   |   |   |            |
|----------|------------|------------|------------|---------|---------------------|---------------|-----|--------|------------|--------|---|---|---|------------|
| MG781190 | Unassigned | Unassigned | Unassigned | 290_89  | Clustered           | 2 VC_290_89   | 2   | 0.0027 | 0.91112556 | 0.0024 | 0 | 0 | 0 | 1 Ref      |
| MG781191 | Unassigned | Unassigned | Unassigned | 290_89  | Clustered           | 2 VC_290_89   | 2   | 0.0027 | 0.91112556 | 0.0024 | 0 | 0 | 0 | 1 Ref      |
| MG784342 | Unassigned | Unassigned | Unassigned | 852_0   | Clustered           | 3 VC_852_0    | 3   | 0.4886 | 0.99843584 | 0.4878 | 0 | 0 | 0 | 1 Ref      |
| MG788324 | Unassigned | Unassigned | Unassigned | 307_1   | Clustered/Singleton | 1 VC_307_1    | 1   | 0      | 1          | 0      | 0 | 0 | 0 | 1 Ref      |
| MG793454 | Unassigned | Unassigned | Unassigned | 226_0   | Clustered           | 5 VC_226_0    | 5   | 0.0793 | 0.99999998 | 0.0793 | 0 | 0 | 0 | 1 Ref      |
| MG812486 | Unassigned | Unassigned | Unassigned | 335_52  | Clustered           | 4 VC_335_52   | 4   | 0.0181 | 0.99998785 | 0.0181 | 0 | 0 | 0 | 1 Ref      |
| MG812487 | Unassigned | Unassigned | Unassigned | 1136_0  | Clustered           | 40 VC_1136_0  | 40  | 0.8746 | 1          | 0.8746 | 0 | 0 | 0 | 1 Ref      |
| MG812488 | Unassigned | Unassigned | Unassigned | 538_98  | Clustered/Singleton | 1 VC_538_98   | 1   | 0      | 1          | 0      | 0 | 0 | 0 | 1 Ref      |
| MG812489 | Unassigned | Unassigned | Unassigned | 335_52  | Clustered           | 4 VC_335_52   | 4   | 0.0181 | 0.99998785 | 0.0181 | 0 | 0 | 0 | 1 Ref      |
| MG812490 | Unassigned | Unassigned | Unassigned | 526_0   | Clustered           | 32 VC_526_0   | 32  | 0.9037 | 1          | 0.9037 | 0 | 0 | 0 | 1 Ref      |
| MG812491 | Unassigned | Unassigned | Unassigned | 526_0   | Clustered           | 32 VC_526_0   | 32  | 0.9037 | 1          | 0.9037 | 0 | 0 | 0 | 1 Ref      |
| MG812492 | Unassigned | Unassigned | Unassigned | 531_0   | Clustered           | 32 VC_531_0   | 32  | 0.6859 | 1          | 0.6859 | 0 | 0 | 0 | 1 Ref      |
| MG812493 | Unassigned | Unassigned | Unassigned | 579_72  | Clustered/Singleton | 1 VC_579_72   | 1   | 0      | 1          | 0      | 0 | 0 | 0 | 1 Ref      |
| MG812494 | Unassigned | Unassigned | Unassigned | 579_68  | Clustered/Singleton | 1 VC_579_68   | 1   | 0      | 1          | 0      | 0 | 0 | 0 | 1 Ref      |
| MG812495 | Unassigned | Unassigned | Unassigned | 335_52  | Clustered           | 4 VC_335_52   | 4   | 0.0181 | 0.99998785 | 0.0181 | 0 | 0 | 0 | 1 Ref      |
| MG812496 | Unassigned | Unassigned | Unassigned | 984_0   | Clustered           | 5 VC_984_0    | 5   | 0.1708 | 0.99999984 | 0.1708 | 0 | 0 | 0 | 1 Ref      |
| MG820632 | Unassigned | Unassigned | Unassigned | 787_0   | Clustered           | 132 VC_787_0  | 132 | 1      | 1          | 1      | 0 | 0 | 0 | 1 Ref      |
| MG820633 | Unassigned | Unassigned | Unassigned | 787_0   | Clustered           | 132 VC_787_0  | 132 | 1      | 1          | 1      | 0 | 0 | 0 | 1 Ref      |
| MG820634 | Unassigned | Unassigned | Unassigned | 787_0   | Clustered           | 132 VC_787_0  | 132 | 1      | 1          | 1      | 0 | 0 | 0 | 1 Ref      |
| MG820635 | Unassigned | Unassigned | Unassigned | 787_0   | Clustered           | 132 VC_787_0  | 132 | 1      | 1          | 1      | 0 | 0 | 0 | 1 Ref      |
| MG820636 | Unassigned | Unassigned | Unassigned | 787_0   | Clustered           | 132 VC_787_0  | 132 | 1      | 1          | 1      | 0 | 0 | 0 | 1 Ref      |
| MG820637 | Unassigned | Unassigned | Unassigned | 787_0   | Clustered           | 132 VC_787_0  | 132 | 1      | 1          | 1      | 0 | 0 | 0 | 1 Ref      |
| MG820638 | Unassigned | Unassigned | Unassigned | 787_0   | Clustered           | 132 VC_787_0  | 132 | 1      | 1          | 1      | 0 | 0 | 0 | 1 Ref      |
| MG820639 | Unassigned | Unassigned | Unassigned | 787_0   | Clustered           | 132 VC_787_0  | 132 | 1      | 1          | 1      | 0 | 0 | 0 | 1 Ref      |
| MG820640 | Unassigned | Unassigned | Unassigned | 787_0   | Clustered           | 132 VC_787_0  | 132 | 1      | 1          | 1      | 0 | 0 | 0 | 1 Ref      |
| MG820641 | Unassigned | Unassigned | Unassigned | 787_0   | Clustered           | 132 VC_787_0  | 132 | 1      | 1          | 1      | 0 | 0 | 0 | 1 Ref      |
| MG820642 | Unassigned | Unassigned | Unassigned | 787_0   | Clustered           | 132 VC_787_0  | 132 | 1      | 1          | 1      | 0 | 0 | 0 | 1 Ref      |
| MG820643 | Unassigned | Unassigned | Unassigned | 787_0   | Clustered           | 132 VC_787_0  | 132 | 1      | 1          | 1      | 0 | 0 | 0 | 1 Ref      |
| MG820644 | Unassigned | Unassigned | Unassigned | 787_0   | Clustered           | 132 VC_787_0  | 132 | 1      | 1          | 1      | 0 | 0 | 0 | 1 Ref      |
| MG820645 | Unassigned | Unassigned | Unassigned | 787_0   | Clustered           | 132 VC_787_0  | 132 | 1      | 1          | 1      | 0 | 0 | 0 | 1 Ref      |
| MG832642 | Unassigned | Unassigned | Unassigned | 405_0   | Clustered           | 126 VC_405_0  | 126 | 0.9614 | 1          | 0.9614 | 0 | 0 | 0 | 1 Ref      |
| MG833025 | Unassigned | Unassigned | Unassigned | 405_0   | Clustered           | 126 VC_405_0  | 126 | 0.9614 | 1          | 0.9614 | 0 | 0 | 0 | 1 Ref      |
| MG835568 | Unassigned | Unassigned | Unassigned | 848_0   | Clustered           | 124 VC_848_0  | 124 | 0.9484 | 1          | 0.9484 | 0 | 0 | 0 | 1 Ref      |
| MG839014 | Unassigned | Unassigned | Unassigned | 527_0   | Clustered           | 37 VC_527_0   | 37  | 0.9679 | 1          | 0.9679 | 0 | 0 | 0 | 1 Ref      |
| MG839015 | Unassigned | Unassigned | Unassigned | 1296_0  | Clustered           | 82 VC_1296_0  | 82  | 0.7938 | 1          | 0.7938 | 0 | 0 | 0 | 1 Ref      |
| MG839016 | Unassigned | Unassigned | Unassigned | 1296_0  | Clustered           | 82 VC_1296_0  | 82  | 0.7938 | 1          | 0.7938 | 0 | 0 | 0 | 1 Ref      |
| MG839017 | Unassigned | Unassigned | Unassigned | 1296_0  | Clustered           | 82 VC_1296_0  | 82  | 0.7938 | 1          | 0.7938 | 0 | 0 | 0 | 1 Ref      |
| MG839018 | Unassigned | Unassigned | Unassigned | 1296_0  | Clustered           | 82 VC_1296_0  | 82  | 0.7938 | 1          | 0.7938 | 0 | 0 | 0 | 1 Ref      |
| MG839020 | Unassigned | Unassigned | Unassigned | 1296_0  | Clustered           | 82 VC_1296_0  | 82  | 0.7938 | 1          | 0.7938 | 0 | 0 | 0 | 1 Ref      |
| MG839021 | Unassigned | Unassigned | Unassigned | 1296_0  | Clustered           | 82 VC_1296_0  | 82  | 0.7938 | 1          | 0.7938 | 0 | 0 | 0 | 1 Ref      |
| MG839022 | Unassigned | Unassigned | Unassigned | 1296_0  | Clustered           | 82 VC_1296_0  | 82  | 0.7938 | 1          | 0.7938 | 0 | 0 | 0 | 1 Ref      |
| MG839023 | Unassigned | Unassigned | Unassigned | 1296_0  | Clustered           | 82 VC_1296_0  | 82  | 0.7938 | 1          | 0.7938 | 0 | 0 | 0 | 1 Ref      |
| MG839026 | Unassigned | Unassigned | Unassigned | 1296_0  | Clustered           | 82 VC_1296_0  | 82  | 0.7938 | 1          | 0.7938 | 0 | 0 | 0 | 1 Ref      |
| MG839027 | Unassigned | Unassigned | Unassigned | 1203_0  | Clustered           | 28 VC_1203_0  | 28  | 0.4905 | 1          | 0.4905 | 0 | 0 | 0 | 1 Ref      |
| MG839028 | Unassigned | Unassigned | Unassigned | 1296_0  | Clustered           | 82 VC_1296_0  | 82  | 0.7938 | 1          | 0.7938 | 0 | 0 | 0 | 1 Ref      |
| MG839029 | Unassigned | Unassigned | Unassigned | 1296_0  | Clustered           | 82 VC_1296_0  | 82  | 0.7938 | 1          | 0.7938 | 0 | 0 | 0 | 1 Ref      |
| MG845684 | Unassigned | Unassigned | Unassigned | 486_0   | Clustered           | 47 VC_486_0   | 47  | 0.9022 | 1          | 0.9022 | 0 | 0 | 0 | 1 Ref      |
| MG845865 | Unassigned | Unassigned | Unassigned | 465_0   | Clustered           | 80 VC_465_0   | 80  | 0.9988 | 1          | 0.9988 | 0 | 0 | 0 | 1 Ref      |
| MG852086 | Unassigned | Unassigned | Unassigned | 655_0   | Clustered           | 45 VC_655_0   | 45  | 0.7722 | 1          | 0.7722 | 0 | 0 | 0 | 1 Ref      |
| MG867727 | Unassigned | Unassigned | Unassigned | 290_138 | Clustered/Singleton | 1 VC_290_138  | 1   | 0      | 1          | 0      | 0 | 0 | 0 | 1 Ref      |
| MG872831 | Unassigned | Unassigned | Unassigned | 571_0   | Clustered           | 16 VC_571_0   | 16  | 0.091  | 1          | 0.091  | 0 | 0 | 0 | 0.6667 Ref |
| MG872832 | Unassigned | Unassigned | Unassigned | 571_0   | Clustered           | 16 VC_571_0   | 16  | 0.091  | 1          | 0.091  | 0 | 0 | 0 | 0.6667 Ref |
| MG872833 | Unassigned | Unassigned | Unassigned | 335_5   | Clustered           | 11 VC_335_5   | 11  | 0.0469 | 1          | 0.0469 | 0 | 0 | 0 | 0.7636 Ref |
| MG872834 | Unassigned | Unassigned | Unassigned | 701_0   | Clustered           | 16 VC_701_0   | 16  | 0.2957 | 1          | 0.2957 | 0 | 0 | 0 | 0.9167 Ref |
| MG872835 | Unassigned | Unassigned | Unassigned | 232_0   | Clustered           | 32 VC_232_0   | 32  | 0.8471 | 1          | 0.8471 | 0 | 0 | 0 | 0.996 Ref  |
| MG872836 | Unassigned | Unassigned | Unassigned | 335_52  | Clustered           | 4 VC_335_52   | 4   | 0.0181 | 0.99998785 | 0.0181 | 0 | 0 | 0 | 1 Ref      |
| MG872837 | Unassigned | Unassigned | Unassigned | 571_6   | Clustered           | 22 VC_571_6   | 22  | 0.1207 | 1          | 0.1207 | 0 | 0 | 0 | 0.8095 Ref |
| MG872838 | Unassigned | Unassigned | Unassigned | 577_0   | Clustered           | 21 VC_577_0   | 21  | 0.9908 | 1          | 0.9908 | 0 | 0 | 0 | 1 Ref      |
| MG872839 | Unassigned | Unassigned | Unassigned | 579_14  | Clustered           | 8 VC_579_14   | 8   | 0.0227 | 0.99904117 | 0.0227 | 0 | 0 | 0 | 0.8214 Ref |
| MG872840 | Unassigned | Unassigned | Unassigned | 232_0   | Clustered           | 32 VC_232_0   | 32  | 0.8471 | 1          | 0.8471 | 0 | 0 | 0 | 0.996 Ref  |
| MG872841 | Unassigned | Unassigned | Unassigned | 538_45  | Clustered           | 7 VC_538_45   | 7   | 0.0632 | 1          | 0.0632 | 0 | 0 | 0 | 0.8095 Ref |
| MG872842 | Unassigned | Unassigned | Unassigned | 232_0   | Clustered           | 32 VC_232_0   | 32  | 0.8471 | 1          | 0.8471 | 0 | 0 | 0 | 0.996 Ref  |
| MG872843 | Unassigned | Unassigned | Unassigned | 571_0   | Clustered           | 16 VC_571_0   | 16  | 0.091  | 1          | 0.091  | 0 | 0 | 0 | 0.6667 Ref |
| MG873442 | Unassigned | Unassigned | Unassigned | 836_0   | Clustered           | 3 VC_836_0    | 3   | 0.1157 | 0.99842379 | 0.1155 | 0 | 0 | 0 | 1 Ref      |
| MG878892 | Unassigned | Unassigned | Unassigned | 907_0   | Clustered           | 32 VC_907_0   | 32  | 0.9964 | 1          | 0.9964 | 0 | 0 | 0 | 1 Ref      |
| MG883709 | Unassigned | Unassigned | Unassigned | 1299_0  | Clustered           | 53 VC_1299_0  | 53  | 0.8666 | 1          | 0.8666 | 0 | 0 | 0 | 1 Ref      |
| MG883710 | Unassigned | Unassigned | Unassigned | 1302_0  | Clustered           | 2 VC_1302_0   | 2   | 1      | 1          | 1      | 0 | 0 | 0 | 1 Ref      |
| MG883711 | Unassigned | Unassigned | Unassigned | 1147_0  | Clustered           | 6 VC_1147_0   | 6   | 0.3066 | 0.99999957 | 0.3066 | 0 | 0 | 0 | 1 Ref      |
| MG883712 | Unassigned | Unassigned | Unassigned | 1241_0  | Clustered           | 13 VC_1241_0  | 13  | 0.8675 | 0.76044592 | 0.6597 | 0 | 0 | 0 | 1 Ref      |
| MG883713 | Unassigned | Unassigned | Unassigned | 1303_0  | Clustered           | 2 VC_1303_0   | 2   | 1      | 1          | 1      | 0 | 0 | 0 | 1 Ref      |
| MG883714 | Unassigned | Unassigned | Unassigned | 1185_0  | Clustered           | 7 VC_1185_0   | 7   | 0.6862 | 1          | 0.6862 | 0 | 0 | 0 | 1 Ref      |
| MG883715 | Unassigned | Unassigned | Unassigned | 690_0   | Clustered           | 12 VC_690_0   | 12  | 1      | 1          | 1      | 0 | 0 | 0 | 1 Ref      |
| MG883717 | Unassigned | Unassigned | Unassigned | 1145_0  | Clustered           | 164 VC_1145_0 | 164 | 0.8868 | 1          | 0.8868 | 0 | 0 | 0 | 1 Ref      |
| MG883718 | Unassigned | Unassigned | Unassigned | 1148_0  | Clustered           | 4 VC_1148_0   | 4   | 0.0503 | 0.99998999 | 0.0503 | 0 | 0 | 0 | 1 Ref      |
| MG883719 | Unassigned | Unassigned | Unassigned | 1155_0  | Clustered           | 14 VC_1155_0  | 14  | 0.8287 | 1          | 0.8287 | 0 | 0 | 0 | 1 Ref      |
| MG883720 | Unassigned | Unassigned | Unassigned | 1304_0  | Clustered           | 7 VC_1304_0   | 7   | 0.9079 | 0.99998959 | 0.9079 | 0 | 0 | 0 | 1 Ref      |
| MG883722 | Unassigned | Unassigned | Unassigned | 1152_0  | Clustered           | 26 VC_1152_0  | 26  | 0.6685 | 1          | 0.6685 | 0 | 0 | 0 | 1 Ref      |
| MG883723 | Unassigned | Unassigned | Unassigned | 206_0   | Clustered           | 28 VC_206_0   | 28  | 0.2427 | 0.99971175 | 0.2426 | 0 | 0 | 0 | 1 Ref      |
| MG883724 | Unassigned | Unassigned | Unassigned | 1307_0  | Clustered           | 5 VC_1307_0   | 5   | 0.6369 | 0.99918945 | 0.6364 | 0 | 0 | 0 | 1 Ref      |
| MG883725 | Unassigned | Unassigned | Unassigned | 690_0   | Clustered           | 12 VC_690_0   | 12  | 1      | 1          | 1      | 0 | 0 | 0 | 1 Ref      |
| MG883726 | Unassigned | Unassigned | Unassigned | 1119_0  | Clustered           | 48 VC_1119_0  | 48  | 0.852  | 1          | 0.852  | 0 | 0 | 0 | 1 Ref      |



|          |            |            |            |        |                     |               |     |        |            |        |   |   |   |            |
|----------|------------|------------|------------|--------|---------------------|---------------|-----|--------|------------|--------|---|---|---|------------|
| MG893203 | Unassigned | Unassigned | Unassigned | 911_0  | Clustered           | 20 VC_911_0   | 20  | 0.9915 | 1          | 0.9915 | 0 | 0 | 0 | 1 Ref      |
| MG894052 | Unassigned | Unassigned | Unassigned | 972_0  | Clustered           | 99 VC_972_0   | 99  | 0.9113 | 1          | 0.9113 | 0 | 0 | 0 | 0.9928 Ref |
| MG897799 | Unassigned | Unassigned | Unassigned | 80_0   | Clustered           | 64 VC_80_0    | 64  | 0.418  | 1          | 0.418  | 0 | 0 | 0 | 0.7649 Ref |
| MG897800 | Unassigned | Unassigned | Unassigned | 766_0  | Clustered           | 40 VC_766_0   | 40  | 0.7511 | 1          | 0.7511 | 0 | 0 | 0 | 1 Ref      |
| MG913376 | Unassigned | Unassigned | Unassigned | 657_0  | Clustered           | 7 VC_657_0    | 7   | 0.8495 | 1          | 0.8495 | 0 | 0 | 0 | 1 Ref      |
| MG920059 | Unassigned | Unassigned | Unassigned | 527_0  | Clustered           | 37 VC_527_0   | 37  | 0.9679 | 1          | 0.9679 | 0 | 0 | 0 | 1 Ref      |
| MG920060 | Unassigned | Unassigned | Unassigned | 335_23 | Clustered           | 17 VC_335_23  | 17  | 0.0714 | 1          | 0.0714 | 0 | 0 | 0 | 0.6397 Ref |
| MG920061 | Unassigned | Unassigned | Unassigned | 1296_0 | Clustered           | 82 VC_1296_0  | 82  | 0.7938 | 1          | 0.7938 | 0 | 0 | 0 | 1 Ref      |
| MG922974 | Unassigned | Unassigned | Unassigned | 801_0  | Clustered           | 37 VC_801_0   | 37  | 0.5672 | 1          | 0.5672 | 0 | 0 | 0 | 1 Ref      |
| MG925338 | Unassigned | Unassigned | Unassigned | 527_0  | Clustered           | 37 VC_527_0   | 37  | 0.9679 | 1          | 0.9679 | 0 | 0 | 0 | 1 Ref      |
| MG925339 | Unassigned | Unassigned | Unassigned | 384_3  | Clustered           | 22 VC_384_3   | 22  | 0.0786 | 1          | 0.0786 | 0 | 0 | 0 | 0.9048 Ref |
| MG925340 | Unassigned | Unassigned | Unassigned | 335_61 | Clustered           | 8 VC_335_61   | 8   | 0.0394 | 1          | 0.0394 | 0 | 0 | 0 | 0.7857 Ref |
| MG925341 | Unassigned | Unassigned | Unassigned | 532_0  | Clustered           | 75 VC_532_0   | 75  | 0.9393 | 1          | 0.9393 | 0 | 0 | 0 | 1 Ref      |
| MG925342 | Unassigned | Unassigned | Unassigned | 335_61 | Clustered           | 8 VC_335_61   | 8   | 0.0394 | 1          | 0.0394 | 0 | 0 | 0 | 0.7857 Ref |
| MG925343 | Unassigned | Unassigned | Unassigned | 1203_0 | Clustered           | 28 VC_1203_0  | 28  | 0.4905 | 1          | 0.4905 | 0 | 0 | 0 | 1 Ref      |
| MG925344 | Unassigned | Unassigned | Unassigned | 335_5  | Clustered           | 11 VC_335_5   | 11  | 0.0469 | 1          | 0.0469 | 0 | 0 | 0 | 0.7636 Ref |
| MG925345 | Unassigned | Unassigned | Unassigned | 1203_0 | Clustered           | 28 VC_1203_0  | 28  | 0.4905 | 1          | 0.4905 | 0 | 0 | 0 | 1 Ref      |
| MG925346 | Unassigned | Unassigned | Unassigned | 384_15 | Clustered           | 44 VC_384_15  | 44  | 0.139  | 1          | 0.139  | 0 | 0 | 0 | 0.7474 Ref |
| MG925347 | Unassigned | Unassigned | Unassigned | 1203_0 | Clustered           | 28 VC_1203_0  | 28  | 0.4905 | 1          | 0.4905 | 0 | 0 | 0 | 1 Ref      |
| MG925348 | Unassigned | Unassigned | Unassigned | 384_16 | Clustered           | 42 VC_384_16  | 42  | 0.134  | 1          | 0.134  | 0 | 0 | 0 | 0.7282 Ref |
| MG925349 | Unassigned | Unassigned | Unassigned | 1087_0 | Clustered           | 7 VC_1087_0   | 7   | 0.94   | 1          | 0.94   | 0 | 0 | 0 | 1 Ref      |
| MG925350 | Unassigned | Unassigned | Unassigned | 384_15 | Clustered           | 44 VC_384_15  | 44  | 0.139  | 1          | 0.139  | 0 | 0 | 0 | 0.7474 Ref |
| MG925351 | Unassigned | Unassigned | Unassigned | 335_23 | Clustered           | 17 VC_335_23  | 17  | 0.0714 | 1          | 0.0714 | 0 | 0 | 0 | 0.6397 Ref |
| MG925352 | Unassigned | Unassigned | Unassigned | 1296_0 | Clustered           | 82 VC_1296_0  | 82  | 0.7938 | 1          | 0.7938 | 0 | 0 | 0 | 1 Ref      |
| MG925353 | Unassigned | Unassigned | Unassigned | 527_0  | Clustered           | 37 VC_527_0   | 37  | 0.9679 | 1          | 0.9679 | 0 | 0 | 0 | 1 Ref      |
| MG925354 | Unassigned | Unassigned | Unassigned | 538_97 | Clustered/Singleton | 1 VC_538_97   | 1   | 0      | 1          | 0      | 0 | 0 | 0 | 1 Ref      |
| MG925355 | Unassigned | Unassigned | Unassigned | 532_0  | Clustered           | 75 VC_532_0   | 75  | 0.9393 | 1          | 0.9393 | 0 | 0 | 0 | 1 Ref      |
| MG925356 | Unassigned | Unassigned | Unassigned | 384_2  | Clustered           | 8 VC_384_2    | 8   | 0.0232 | 1          | 0.0232 | 0 | 0 | 0 | 0.8571 Ref |
| MG941013 | Unassigned | Unassigned | Unassigned | 877_0  | Clustered           | 2 VC_877_0    | 2   | 0.2717 | 0.72985431 | 0.1983 | 0 | 0 | 0 | 1 Ref      |
| MG944216 | Unassigned | Unassigned | Unassigned | 1203_0 | Clustered           | 28 VC_1203_0  | 28  | 0.4905 | 1          | 0.4905 | 0 | 0 | 0 | 1 Ref      |
| MG944217 | Unassigned | Unassigned | Unassigned | 535_1  | Clustered           | 108 VC_535_1  | 108 | 0.8479 | 1          | 0.8479 | 0 | 0 | 0 | 0.9955 Ref |
| MG944218 | Unassigned | Unassigned | Unassigned | 1203_0 | Clustered           | 28 VC_1203_0  | 28  | 0.4905 | 1          | 0.4905 | 0 | 0 | 0 | 1 Ref      |
| MG944219 | Unassigned | Unassigned | Unassigned | 1296_0 | Clustered           | 82 VC_1296_0  | 82  | 0.7938 | 1          | 0.7938 | 0 | 0 | 0 | 1 Ref      |
| MG944220 | Unassigned | Unassigned | Unassigned | 335_26 | Clustered/Singleton | 1 VC_335_26   | 1   | 0      | 0          | 0      | 0 | 0 | 0 | 1 Ref      |
| MG944221 | Unassigned | Unassigned | Unassigned | 335_7  | Clustered           | 3 VC_335_7    | 3   | 0.0085 | 0.99739782 | 0.0085 | 0 | 0 | 0 | 0.6667 Ref |
| MG944222 | Unassigned | Unassigned | Unassigned | 1296_0 | Clustered           | 82 VC_1296_0  | 82  | 0.7938 | 1          | 0.7938 | 0 | 0 | 0 | 1 Ref      |
| MG944223 | Unassigned | Unassigned | Unassigned | 384_13 | Clustered           | 33 VC_384_13  | 33  | 0.1785 | 1          | 0.1785 | 0 | 0 | 0 | 0.8769 Ref |
| MG944224 | Unassigned | Unassigned | Unassigned | 535_1  | Clustered           | 108 VC_535_1  | 108 | 0.8479 | 1          | 0.8479 | 0 | 0 | 0 | 0.9955 Ref |
| MG944225 | Unassigned | Unassigned | Unassigned | 384_15 | Clustered           | 44 VC_384_15  | 44  | 0.139  | 1          | 0.139  | 0 | 0 | 0 | 0.7474 Ref |
| MG944226 | Unassigned | Unassigned | Unassigned | 1203_0 | Clustered           | 28 VC_1203_0  | 28  | 0.4905 | 1          | 0.4905 | 0 | 0 | 0 | 1 Ref      |
| MG944227 | Unassigned | Unassigned | Unassigned | 377_0  | Clustered           | 16 VC_377_0   | 16  | 0.6424 | 1          | 0.6424 | 0 | 0 | 0 | 1 Ref      |
| MG944228 | Unassigned | Unassigned | Unassigned | 377_0  | Clustered           | 16 VC_377_0   | 16  | 0.6424 | 1          | 0.6424 | 0 | 0 | 0 | 1 Ref      |
| MG944229 | Unassigned | Unassigned | Unassigned | 377_0  | Clustered           | 16 VC_377_0   | 16  | 0.6424 | 1          | 0.6424 | 0 | 0 | 0 | 1 Ref      |
| MG944230 | Unassigned | Unassigned | Unassigned | 377_0  | Clustered           | 16 VC_377_0   | 16  | 0.6424 | 1          | 0.6424 | 0 | 0 | 0 | 1 Ref      |
| MG944231 | Unassigned | Unassigned | Unassigned | 377_0  | Clustered           | 16 VC_377_0   | 16  | 0.6424 | 1          | 0.6424 | 0 | 0 | 0 | 1 Ref      |
| MG944232 | Unassigned | Unassigned | Unassigned | 377_0  | Clustered           | 16 VC_377_0   | 16  | 0.6424 | 1          | 0.6424 | 0 | 0 | 0 | 1 Ref      |
| MG944233 | Unassigned | Unassigned | Unassigned | 377_0  | Clustered           | 16 VC_377_0   | 16  | 0.6424 | 1          | 0.6424 | 0 | 0 | 0 | 1 Ref      |
| MG944234 | Unassigned | Unassigned | Unassigned | 377_0  | Clustered           | 16 VC_377_0   | 16  | 0.6424 | 1          | 0.6424 | 0 | 0 | 0 | 1 Ref      |
| MG944235 | Unassigned | Unassigned | Unassigned | 377_0  | Clustered           | 16 VC_377_0   | 16  | 0.6424 | 1          | 0.6424 | 0 | 0 | 0 | 1 Ref      |
| MG944236 | Unassigned | Unassigned | Unassigned | 377_0  | Clustered           | 16 VC_377_0   | 16  | 0.6424 | 1          | 0.6424 | 0 | 0 | 0 | 1 Ref      |
| MG945128 | Unassigned | Unassigned | Unassigned | 1308_0 | Clustered           | 15 VC_1308_0  | 15  | 0.9074 | 1          | 0.9074 | 0 | 0 | 0 | 1 Ref      |
| MG945129 | Unassigned | Unassigned | Unassigned | 1119_0 | Clustered           | 48 VC_1119_0  | 48  | 0.852  | 1          | 0.852  | 0 | 0 | 0 | 1 Ref      |
| MG945130 | Unassigned | Unassigned | Unassigned | 1286_0 | Clustered           | 16 VC_1286_0  | 16  | 0.9448 | 1          | 0.9448 | 0 | 0 | 0 | 1 Ref      |
| MG945131 | Unassigned | Unassigned | Unassigned | 1153_0 | Clustered           | 2 VC_1153_0   | 2   | 0.0506 | 0.94785574 | 0.048  | 0 | 0 | 0 | 1 Ref      |
| MG945134 | Unassigned | Unassigned | Unassigned | 1147_0 | Clustered           | 6 VC_1147_0   | 6   | 0.3066 | 0.99999957 | 0.3066 | 0 | 0 | 0 | 1 Ref      |
| MG945135 | Unassigned | Unassigned | Unassigned | 1167_0 | Clustered           | 11 VC_1167_0  | 11  | 0.5637 | 1          | 0.5637 | 0 | 0 | 0 | 1 Ref      |
| MG945136 | Unassigned | Unassigned | Unassigned | 1167_0 | Clustered           | 11 VC_1167_0  | 11  | 0.5637 | 1          | 0.5637 | 0 | 0 | 0 | 1 Ref      |
| MG945138 | Unassigned | Unassigned | Unassigned | 1169_0 | Clustered           | 8 VC_1169_0   | 8   | 0.2897 | 1          | 0.2897 | 0 | 0 | 0 | 1 Ref      |
| MG945139 | Unassigned | Unassigned | Unassigned | 1155_0 | Clustered           | 14 VC_1155_0  | 14  | 0.8287 | 1          | 0.8287 | 0 | 0 | 0 | 1 Ref      |
| MG945140 | Unassigned | Unassigned | Unassigned | 1314_0 | Clustered           | 6 VC_1314_0   | 6   | 0.6504 | 0.99999969 | 0.6504 | 0 | 0 | 0 | 1 Ref      |
| MG945141 | Unassigned | Unassigned | Unassigned | 1267_0 | Clustered           | 26 VC_1267_0  | 26  | 0.9597 | 0.99999998 | 0.9597 | 0 | 0 | 0 | 1 Ref      |
| MG945142 | Unassigned | Unassigned | Unassigned | 1177_0 | Clustered           | 2 VC_1177_0   | 2   | 0.6063 | 0.90610936 | 0.5494 | 0 | 0 | 0 | 1 Ref      |
| MG945153 | Unassigned | Unassigned | Unassigned | 1145_0 | Clustered           | 164 VC_1145_0 | 164 | 0.8868 | 1          | 0.8868 | 0 | 0 | 0 | 1 Ref      |
| MG945154 | Unassigned | Unassigned | Unassigned | 1161_0 | Clustered           | 16 VC_1161_0  | 16  | 0.4834 | 0.99999958 | 0.4834 | 0 | 0 | 0 | 1 Ref      |
| MG945157 | Unassigned | Unassigned | Unassigned | 1167_0 | Clustered           | 11 VC_1167_0  | 11  | 0.5637 | 1          | 0.5637 | 0 | 0 | 0 | 1 Ref      |
| MG945158 | Unassigned | Unassigned | Unassigned | 1145_0 | Clustered           | 164 VC_1145_0 | 164 | 0.8868 | 1          | 0.8868 | 0 | 0 | 0 | 1 Ref      |
| MG945159 | Unassigned | Unassigned | Unassigned | 1308_0 | Clustered           | 15 VC_1308_0  | 15  | 0.9074 | 1          | 0.9074 | 0 | 0 | 0 | 1 Ref      |
| MG945160 | Unassigned | Unassigned | Unassigned | 1235_0 | Clustered           | 3 VC_1235_0   | 3   | 0.1401 | 0.98976974 | 0.1387 | 0 | 0 | 0 | 1 Ref      |
| MG945161 | Unassigned | Unassigned | Unassigned | 1033_0 | Clustered           | 21 VC_1033_0  | 21  | 0.8433 | 0.99999998 | 0.8433 | 0 | 0 | 0 | 1 Ref      |
| MG945162 | Unassigned | Unassigned | Unassigned | 1170_0 | Clustered           | 19 VC_1170_0  | 19  | 0.7497 | 1          | 0.7497 | 0 | 0 | 0 | 1 Ref      |
| MG945163 | Unassigned | Unassigned | Unassigned | 1145_0 | Clustered           | 164 VC_1145_0 | 164 | 0.8868 | 1          | 0.8868 | 0 | 0 | 0 | 1 Ref      |
| MG945164 | Unassigned | Unassigned | Unassigned | 411_0  | Clustered           | 48 VC_411_0   | 48  | 0.4808 | 1          | 0.4808 | 0 | 0 | 0 | 1 Ref      |
| MG945165 | Unassigned | Unassigned | Unassigned | 1317_0 | Clustered           | 2 VC_1317_0   | 2   | 1      | 1          | 1      | 0 | 0 | 0 | 1 Ref      |
| MG945166 | Unassigned | Unassigned | Unassigned | 1316_0 | Clustered           | 8 VC_1316_0   | 8   | 0.821  | 1          | 0.821  | 0 | 0 | 0 | 1 Ref      |
| MG945177 | Unassigned | Unassigned | Unassigned | 1318_0 | Clustered           | 5 VC_1318_0   | 5   | 0.764  | 0.99993003 | 0.7639 | 0 | 0 | 0 | 1 Ref      |
| MG945178 | Unassigned | Unassigned | Unassigned | 1104_0 | Clustered           | 44 VC_1104_0  | 44  | 0.9574 | 0.72818579 | 0.6972 | 0 | 0 | 0 | 1 Ref      |
| MG945179 | Unassigned | Unassigned | Unassigned | 1189_0 | Clustered           | 16 VC_1189_0  | 16  | 0.8814 | 1          | 0.8814 | 0 | 0 | 0 | 1 Ref      |
| MG945181 | Unassigned | Unassigned | Unassigned | 1320_0 | Clustered           | 10 VC_1320_0  | 10  | 0.8478 | 1          | 0.8478 | 0 | 0 | 0 | 1 Ref      |
| MG945183 | Unassigned | Unassigned | Unassigned | 1321_0 | Clustered           | 2 VC_1321_0   | 2   | 1      | 1          | 1      | 0 | 0 | 0 | 1 Ref      |
| MG945185 | Unassigned | Unassigned | Unassigned | 1235_0 | Clustered           | 3 VC_1235_0   | 3   | 0.1401 | 0.98976974 | 0.1387 | 0 | 0 | 0 | 1 Ref      |
| MG945186 | Unassigned | Unassigned | Unassigned | 1165_0 | Clustered           | 10 VC_1165_0  | 10  | 0.9263 | 1          | 0.9263 | 0 | 0 | 0 | 1 Ref      |



|          |            |            |            |        |           |               |     |        |            |        |   |   |   |       |
|----------|------------|------------|------------|--------|-----------|---------------|-----|--------|------------|--------|---|---|---|-------|
| MG945188 | Unassigned | Unassigned | Unassigned | 1308.0 | Clustered | 15 VC_1308_0  | 15  | 0.9074 | 1          | 0.9074 | 0 | 0 | 0 | 1 Ref |
| MG945189 | Unassigned | Unassigned | Unassigned | 1324.0 | Clustered | 5 VC_1324_0   | 5   | 1      | 1          | 1      | 0 | 0 | 0 | 1 Ref |
| MG945190 | Unassigned | Unassigned | Unassigned | 1145.0 | Clustered | 164 VC_1145_0 | 164 | 0.8868 | 1          | 0.8868 | 0 | 0 | 0 | 1 Ref |
| MG945202 | Unassigned | Unassigned | Unassigned | 1028.0 | Clustered | 69 VC_1028_0  | 69  | 0.8547 | 1          | 0.8547 | 0 | 0 | 0 | 1 Ref |
| MG945203 | Unassigned | Unassigned | Unassigned | 1145.0 | Clustered | 164 VC_1145_0 | 164 | 0.8868 | 1          | 0.8868 | 0 | 0 | 0 | 1 Ref |
| MG945204 | Unassigned | Unassigned | Unassigned | 1192.0 | Clustered | 4 VC_1192_0   | 4   | 0.7187 | 0.99971165 | 0.7185 | 0 | 0 | 0 | 1 Ref |
| MG945205 | Unassigned | Unassigned | Unassigned | 1145.0 | Clustered | 164 VC_1145_0 | 164 | 0.8868 | 1          | 0.8868 | 0 | 0 | 0 | 1 Ref |
| MG945206 | Unassigned | Unassigned | Unassigned | 1119.0 | Clustered | 48 VC_1119_0  | 48  | 0.852  | 1          | 0.852  | 0 | 0 | 0 | 1 Ref |
| MG945207 | Unassigned | Unassigned | Unassigned | 1145.0 | Clustered | 164 VC_1145_0 | 164 | 0.8868 | 1          | 0.8868 | 0 | 0 | 0 | 1 Ref |
| MG945208 | Unassigned | Unassigned | Unassigned | 1316.0 | Clustered | 8 VC_1316_0   | 8   | 0.821  | 1          | 0.821  | 0 | 0 | 0 | 1 Ref |
| MG945209 | Unassigned | Unassigned | Unassigned | 1325.0 | Clustered | 7 VC_1325_0   | 7   | 1      | 1          | 1      | 0 | 0 | 0 | 1 Ref |
| MG945210 | Unassigned | Unassigned | Unassigned | 1238.0 | Clustered | 5 VC_1238_0   | 5   | 0.5217 | 0.9999899  | 0.5217 | 0 | 0 | 0 | 1 Ref |
| MG945211 | Unassigned | Unassigned | Unassigned | 1320.0 | Clustered | 10 VC_1320_0  | 10  | 0.8478 | 1          | 0.8478 | 0 | 0 | 0 | 1 Ref |
| MG945212 | Unassigned | Unassigned | Unassigned | 1326.0 | Clustered | 3 VC_1326_0   | 3   | 0.0804 | 0.6862532  | 0.0552 | 0 | 0 | 0 | 1 Ref |
| MG945213 | Unassigned | Unassigned | Unassigned | 1145.0 | Clustered | 164 VC_1145_0 | 164 | 0.8868 | 1          | 0.8868 | 0 | 0 | 0 | 1 Ref |
| MG945214 | Unassigned | Unassigned | Unassigned | 1328.0 | Clustered | 3 VC_1328_0   | 3   | 0.6791 | 0.98688028 | 0.6702 | 0 | 0 | 0 | 1 Ref |
| MG945215 | Unassigned | Unassigned | Unassigned | 690.0  | Clustered | 12 VC_690_0   | 12  | 1      | 1          | 1      | 0 | 0 | 0 | 1 Ref |
| MG945227 | Unassigned | Unassigned | Unassigned | 1145.0 | Clustered | 164 VC_1145_0 | 164 | 0.8868 | 1          | 0.8868 | 0 | 0 | 0 | 1 Ref |
| MG945228 | Unassigned | Unassigned | Unassigned | 1191.0 | Clustered | 9 VC_1191_0   | 9   | 0.8537 | 0          | 0.8537 | 0 | 0 | 0 | 1 Ref |
| MG945229 | Unassigned | Unassigned | Unassigned | 1308.0 | Clustered | 15 VC_1308_0  | 15  | 0.9074 | 1          | 0.9074 | 0 | 0 | 0 | 1 Ref |
| MG945230 | Unassigned | Unassigned | Unassigned | 1329.0 | Clustered | 2 VC_1329_0   | 2   | 1      | 1          | 1      | 0 | 0 | 0 | 1 Ref |
| MG945232 | Unassigned | Unassigned | Unassigned | 1320.0 | Clustered | 10 VC_1320_0  | 10  | 0.8478 | 1          | 0.8478 | 0 | 0 | 0 | 1 Ref |
| MG945233 | Unassigned | Unassigned | Unassigned | 1170.0 | Clustered | 19 VC_1170_0  | 19  | 0.7497 | 1          | 0.7497 | 0 | 0 | 0 | 1 Ref |
| MG945234 | Unassigned | Unassigned | Unassigned | 1187.0 | Clustered | 3 VC_1187_0   | 3   | 0.5022 | 0.99747895 | 0.501  | 0 | 0 | 0 | 1 Ref |
| MG945235 | Unassigned | Unassigned | Unassigned | 1330.0 | Clustered | 5 VC_1330_0   | 5   | 1      | 1          | 1      | 0 | 0 | 0 | 1 Ref |
| MG945236 | Unassigned | Unassigned | Unassigned | 1331.0 | Clustered | 6 VC_1331_0   | 6   | 0.7375 | 0.9999804  | 0.7375 | 0 | 0 | 0 | 1 Ref |
| MG945237 | Unassigned | Unassigned | Unassigned | 1145.0 | Clustered | 164 VC_1145_0 | 164 | 0.8868 | 1          | 0.8868 | 0 | 0 | 0 | 1 Ref |
| MG945238 | Unassigned | Unassigned | Unassigned | 1145.0 | Clustered | 164 VC_1145_0 | 164 | 0.8868 | 1          | 0.8868 | 0 | 0 | 0 | 1 Ref |
| MG945241 | Unassigned | Unassigned | Unassigned | 1313.0 | Clustered | 4 VC_1313_0   | 4   | 0.5804 | 0.94751743 | 0.5499 | 0 | 0 | 0 | 1 Ref |
| MG945252 | Unassigned | Unassigned | Unassigned | 1333.0 | Clustered | 4 VC_1333_0   | 4   | 1      | 1          | 1      | 0 | 0 | 0 | 1 Ref |
| MG945254 | Unassigned | Unassigned | Unassigned | 760.0  | Clustered | 15 VC_760_0   | 15  | 1      | 1          | 1      | 0 | 0 | 0 | 1 Ref |
| MG945255 | Unassigned | Unassigned | Unassigned | 1308.0 | Clustered | 15 VC_1308_0  | 15  | 0.9074 | 1          | 0.9074 | 0 | 0 | 0 | 1 Ref |
| MG945256 | Unassigned | Unassigned | Unassigned | 1286.0 | Clustered | 16 VC_1286_0  | 16  | 0.9448 | 1          | 0.9448 | 0 | 0 | 0 | 1 Ref |
| MG945257 | Unassigned | Unassigned | Unassigned | 1314.0 | Clustered | 6 VC_1314_0   | 6   | 0.6504 | 0.99999969 | 0.6504 | 0 | 0 | 0 | 1 Ref |
| MG945258 | Unassigned | Unassigned | Unassigned | 1338.0 | Clustered | 4 VC_1338_0   | 4   | 0.6053 | 0.76972092 | 0.4659 | 0 | 0 | 0 | 1 Ref |
| MG945260 | Unassigned | Unassigned | Unassigned | 1299.0 | Clustered | 53 VC_1299_0  | 53  | 0.8666 | 1          | 0.8666 | 0 | 0 | 0 | 1 Ref |
| MG945261 | Unassigned | Unassigned | Unassigned | 1322.0 | Clustered | 6 VC_1322_0   | 6   | 0.7063 | 0.92055725 | 0.6502 | 0 | 0 | 0 | 1 Ref |
| MG945263 | Unassigned | Unassigned | Unassigned | 1325.0 | Clustered | 7 VC_1325_0   | 7   | 1      | 1          | 1      | 0 | 0 | 0 | 1 Ref |
| MG945275 | Unassigned | Unassigned | Unassigned | 1324.0 | Clustered | 5 VC_1324_0   | 5   | 1      | 1          | 1      | 0 | 0 | 0 | 1 Ref |
| MG945276 | Unassigned | Unassigned | Unassigned | 1313.0 | Clustered | 4 VC_1313_0   | 4   | 0.5804 | 0.94751743 | 0.5499 | 0 | 0 | 0 | 1 Ref |
| MG945278 | Unassigned | Unassigned | Unassigned | 1340.0 | Clustered | 7 VC_1340_0   | 7   | 0.9206 | 0.99995294 | 0.9206 | 0 | 0 | 0 | 1 Ref |
| MG945279 | Unassigned | Unassigned | Unassigned | 1325.0 | Clustered | 7 VC_1325_0   | 7   | 1      | 1          | 1      | 0 | 0 | 0 | 1 Ref |
| MG945280 | Unassigned | Unassigned | Unassigned | 1341.0 | Clustered | 4 VC_1341_0   | 4   | 1      | 1          | 1      | 0 | 0 | 0 | 1 Ref |
| MG945282 | Unassigned | Unassigned | Unassigned | 1299.0 | Clustered | 53 VC_1299_0  | 53  | 0.8666 | 1          | 0.8666 | 0 | 0 | 0 | 1 Ref |
| MG945284 | Unassigned | Unassigned | Unassigned | 1241.0 | Clustered | 13 VC_1241_0  | 13  | 0.8675 | 0.76044592 | 0.6597 | 0 | 0 | 0 | 1 Ref |
| MG945285 | Unassigned | Unassigned | Unassigned | 1340.0 | Clustered | 7 VC_1340_0   | 7   | 0.9206 | 0.99995294 | 0.9206 | 0 | 0 | 0 | 1 Ref |
| MG945286 | Unassigned | Unassigned | Unassigned | 1152.0 | Clustered | 26 VC_1152_0  | 26  | 0.6685 | 1          | 0.6685 | 0 | 0 | 0 | 1 Ref |
| MG945309 | Unassigned | Unassigned | Unassigned | 1343.0 | Clustered | 2 VC_1343_0   | 2   | 1      | 1          | 1      | 0 | 0 | 0 | 1 Ref |
| MG945310 | Unassigned | Unassigned | Unassigned | 1152.0 | Clustered | 26 VC_1152_0  | 26  | 0.6685 | 1          | 0.6685 | 0 | 0 | 0 | 1 Ref |
| MG945311 | Unassigned | Unassigned | Unassigned | 1152.0 | Clustered | 26 VC_1152_0  | 26  | 0.6685 | 1          | 0.6685 | 0 | 0 | 0 | 1 Ref |
| MG945312 | Unassigned | Unassigned | Unassigned | 1152.0 | Clustered | 26 VC_1152_0  | 26  | 0.6685 | 1          | 0.6685 | 0 | 0 | 0 | 1 Ref |
| MG945314 | Unassigned | Unassigned | Unassigned | 1321.0 | Clustered | 2 VC_1321_0   | 2   | 1      | 1          | 1      | 0 | 0 | 0 | 1 Ref |
| MG945316 | Unassigned | Unassigned | Unassigned | 1346.0 | Clustered | 25 VC_1346_0  | 25  | 1      | 1          | 1      | 0 | 0 | 0 | 1 Ref |
| MG945318 | Unassigned | Unassigned | Unassigned | 1145.0 | Clustered | 164 VC_1145_0 | 164 | 0.8868 | 1          | 0.8868 | 0 | 0 | 0 | 1 Ref |
| MG945319 | Unassigned | Unassigned | Unassigned | 1152.0 | Clustered | 26 VC_1152_0  | 26  | 0.6685 | 1          | 0.6685 | 0 | 0 | 0 | 1 Ref |
| MG945320 | Unassigned | Unassigned | Unassigned | 1180.0 | Clustered | 4 VC_1180_0   | 4   | 1      | 1          | 1      | 0 | 0 | 0 | 1 Ref |
| MG945323 | Unassigned | Unassigned | Unassigned | 1308.0 | Clustered | 15 VC_1308_0  | 15  | 0.9074 | 1          | 0.9074 | 0 | 0 | 0 | 1 Ref |
| MG945324 | Unassigned | Unassigned | Unassigned | 206.0  | Clustered | 28 VC_206_0   | 28  | 0.2427 | 0.99971175 | 0.2426 | 0 | 0 | 0 | 1 Ref |
| MG945325 | Unassigned | Unassigned | Unassigned | 1145.0 | Clustered | 164 VC_1145_0 | 164 | 0.8868 | 1          | 0.8868 | 0 | 0 | 0 | 1 Ref |
| MG945327 | Unassigned | Unassigned | Unassigned | 1238.0 | Clustered | 5 VC_1238_0   | 5   | 0.5217 | 0.9999899  | 0.5217 | 0 | 0 | 0 | 1 Ref |
| MG945329 | Unassigned | Unassigned | Unassigned | 1316.0 | Clustered | 8 VC_1316_0   | 8   | 0.821  | 1          | 0.821  | 0 | 0 | 0 | 1 Ref |
| MG945330 | Unassigned | Unassigned | Unassigned | 1145.0 | Clustered | 164 VC_1145_0 | 164 | 0.8868 | 1          | 0.8868 | 0 | 0 | 0 | 1 Ref |
| MG945331 | Unassigned | Unassigned | Unassigned | 1348.0 | Clustered | 7 VC_1348_0   | 7   | 1      | 1          | 1      | 0 | 0 | 0 | 1 Ref |
| MG945332 | Unassigned | Unassigned | Unassigned | 1308.0 | Clustered | 15 VC_1308_0  | 15  | 0.9074 | 1          | 0.9074 | 0 | 0 | 0 | 1 Ref |
| MG945333 | Unassigned | Unassigned | Unassigned | 1145.0 | Clustered | 164 VC_1145_0 | 164 | 0.8868 | 1          | 0.8868 | 0 | 0 | 0 | 1 Ref |
| MG945334 | Unassigned | Unassigned | Unassigned | 1170.0 | Clustered | 19 VC_1170_0  | 19  | 0.7497 | 1          | 0.7497 | 0 | 0 | 0 | 1 Ref |
| MG945335 | Unassigned | Unassigned | Unassigned | 1349.0 | Clustered | 3 VC_1349_0   | 3   | 1      | 1          | 1      | 0 | 0 | 0 | 1 Ref |
| MG945336 | Unassigned | Unassigned | Unassigned | 1347.0 | Clustered | 3 VC_1347_0   | 3   | 0.655  | 0.86585706 | 0.5671 | 0 | 0 | 0 | 1 Ref |
| MG945337 | Unassigned | Unassigned | Unassigned | 1350.0 | Clustered | 2 VC_1350_0   | 2   | 1      | 1          | 1      | 0 | 0 | 0 | 1 Ref |
| MG945338 | Unassigned | Unassigned | Unassigned | 1152.0 | Clustered | 26 VC_1152_0  | 26  | 0.6685 | 1          | 0.6685 | 0 | 0 | 0 | 1 Ref |
| MG945339 | Unassigned | Unassigned | Unassigned | 1155.0 | Clustered | 14 VC_1155_0  | 14  | 0.8287 | 1          | 0.8287 | 0 | 0 | 0 | 1 Ref |
| MG945340 | Unassigned | Unassigned | Unassigned | 1320.0 | Clustered | 10 VC_1320_0  | 10  | 0.8478 | 1          | 0.8478 | 0 | 0 | 0 | 1 Ref |
| MG945341 | Unassigned | Unassigned | Unassigned | 690.0  | Clustered | 12 VC_690_0   | 12  | 1      | 1          | 1      | 0 | 0 | 0 | 1 Ref |
| MG945343 | Unassigned | Unassigned | Unassigned | 1348.0 | Clustered | 7 VC_1348_0   | 7   | 1      | 1          | 1      | 0 | 0 | 0 | 1 Ref |
| MG945344 | Unassigned | Unassigned | Unassigned | 1346.0 | Clustered | 25 VC_1346_0  | 25  | 1      | 1          | 1      | 0 | 0 | 0 | 1 Ref |
| MG945345 | Unassigned | Unassigned | Unassigned | 1351.0 | Clustered | 2 VC_1351_0   | 2   | 1      | 1          | 1      | 0 | 0 | 0 | 1 Ref |
| MG945346 | Unassigned | Unassigned | Unassigned | 1145.0 | Clustered | 164 VC_1145_0 | 164 | 0.8868 | 1          | 0.8868 | 0 | 0 | 0 | 1 Ref |
| MG945347 | Unassigned | Unassigned | Unassigned | 1152.0 | Clustered | 26 VC_1152_0  | 26  | 0.6685 | 1          | 0.6685 | 0 | 0 | 0 | 1 Ref |
| MG945348 | Unassigned | Unassigned | Unassigned | 1352.0 | Clustered | 3 VC_1352_0   | 3   | 1      | 1          | 1      | 0 | 0 | 0 | 1 Ref |
| MG945349 | Unassigned | Unassigned | Unassigned | 1318.0 | Clustered | 5 VC_1318_0   | 5   | 0.764  | 0.99993003 | 0.7639 | 0 | 0 | 0 | 1 Ref |
| MG945350 | Unassigned | Unassigned | Unassigned | 1353.0 | Clustered | 4 VC_1353_0   | 4   | 0.7838 | 0.99289298 | 0.7782 | 0 | 0 | 0 | 1 Ref |



|          |            |            |            |        |           |               |     |        |            |        |   |   |   |       |
|----------|------------|------------|------------|--------|-----------|---------------|-----|--------|------------|--------|---|---|---|-------|
| MG945351 | Unassigned | Unassigned | Unassigned | 1145_0 | Clustered | 164 VC_1145_0 | 164 | 0.8868 | 1          | 0.8868 | 0 | 0 | 0 | 1 Ref |
| MG945352 | Unassigned | Unassigned | Unassigned | 1237_0 | Clustered | 3 VC_1237_0   | 3   | 0.5448 | 0.99523779 | 0.5422 | 0 | 0 | 0 | 1 Ref |
| MG945354 | Unassigned | Unassigned | Unassigned | 1354_0 | Clustered | 6 VC_1354_0   | 6   | 0.6609 | 0.99999272 | 0.6609 | 0 | 0 | 0 | 1 Ref |
| MG945355 | Unassigned | Unassigned | Unassigned | 1145_0 | Clustered | 164 VC_1145_0 | 164 | 0.8868 | 1          | 0.8868 | 0 | 0 | 0 | 1 Ref |
| MG945357 | Unassigned | Unassigned | Unassigned | 1189_0 | Clustered | 16 VC_1189_0  | 16  | 0.8814 | 1          | 0.8814 | 0 | 0 | 0 | 1 Ref |
| MG945359 | Unassigned | Unassigned | Unassigned | 1146_0 | Clustered | 3 VC_1146_0   | 3   | 0.3655 | 0.99631816 | 0.3642 | 0 | 0 | 0 | 1 Ref |
| MG945360 | Unassigned | Unassigned | Unassigned | 1355_0 | Clustered | 3 VC_1355_0   | 3   | 1      | 0          | 0      | 0 | 0 | 0 | 1 Ref |
| MG945361 | Unassigned | Unassigned | Unassigned | 1145_0 | Clustered | 164 VC_1145_0 | 164 | 0.8868 | 1          | 0.8868 | 0 | 0 | 0 | 1 Ref |
| MG945362 | Unassigned | Unassigned | Unassigned | 1356_0 | Clustered | 4 VC_1356_0   | 4   | 0.8682 | 0.91151676 | 0.7914 | 0 | 0 | 0 | 1 Ref |
| MG945363 | Unassigned | Unassigned | Unassigned | 1145_0 | Clustered | 164 VC_1145_0 | 164 | 0.8868 | 1          | 0.8868 | 0 | 0 | 0 | 1 Ref |
| MG945364 | Unassigned | Unassigned | Unassigned | 1185_0 | Clustered | 7 VC_1185_0   | 7   | 0.6862 | 1          | 0.6862 | 0 | 0 | 0 | 1 Ref |
| MG945365 | Unassigned | Unassigned | Unassigned | 1316_0 | Clustered | 8 VC_1316_0   | 8   | 0.821  | 1          | 0.821  | 0 | 0 | 0 | 1 Ref |
| MG945381 | Unassigned | Unassigned | Unassigned | 1169_0 | Clustered | 8 VC_1169_0   | 8   | 0.2897 | 1          | 0.2897 | 0 | 0 | 0 | 1 Ref |
| MG945382 | Unassigned | Unassigned | Unassigned | 1169_0 | Clustered | 8 VC_1169_0   | 8   | 0.2897 | 1          | 0.2897 | 0 | 0 | 0 | 1 Ref |
| MG945383 | Unassigned | Unassigned | Unassigned | 1170_0 | Clustered | 19 VC_1170_0  | 19  | 0.7497 | 1          | 0.7497 | 0 | 0 | 0 | 1 Ref |
| MG945384 | Unassigned | Unassigned | Unassigned | 1304_0 | Clustered | 7 VC_1304_0   | 7   | 0.9079 | 0.99998959 | 0.9079 | 0 | 0 | 0 | 1 Ref |
| MG945385 | Unassigned | Unassigned | Unassigned | 1152_0 | Clustered | 26 VC_1152_0  | 26  | 0.6685 | 1          | 0.6685 | 0 | 0 | 0 | 1 Ref |
| MG945386 | Unassigned | Unassigned | Unassigned | 1148_0 | Clustered | 4 VC_1148_0   | 4   | 0.0503 | 0.99998999 | 0.0503 | 0 | 0 | 0 | 1 Ref |
| MG945387 | Unassigned | Unassigned | Unassigned | 1145_0 | Clustered | 164 VC_1145_0 | 164 | 0.8868 | 1          | 0.8868 | 0 | 0 | 0 | 1 Ref |
| MG945389 | Unassigned | Unassigned | Unassigned | 1152_0 | Clustered | 26 VC_1152_0  | 26  | 0.6685 | 1          | 0.6685 | 0 | 0 | 0 | 1 Ref |
| MG945390 | Unassigned | Unassigned | Unassigned | 1299_0 | Clustered | 53 VC_1299_0  | 53  | 0.8666 | 1          | 0.8666 | 0 | 0 | 0 | 1 Ref |
| MG945391 | Unassigned | Unassigned | Unassigned | 1167_0 | Clustered | 11 VC_1167_0  | 11  | 0.5637 | 1          | 0.5637 | 0 | 0 | 0 | 1 Ref |
| MG945392 | Unassigned | Unassigned | Unassigned | 1330_0 | Clustered | 5 VC_1330_0   | 5   | 1      | 1          | 1      | 0 | 0 | 0 | 1 Ref |
| MG945393 | Unassigned | Unassigned | Unassigned | 1145_0 | Clustered | 164 VC_1145_0 | 164 | 0.8868 | 1          | 0.8868 | 0 | 0 | 0 | 1 Ref |
| MG945394 | Unassigned | Unassigned | Unassigned | 1155_0 | Clustered | 14 VC_1155_0  | 14  | 0.8287 | 1          | 0.8287 | 0 | 0 | 0 | 1 Ref |
| MG945395 | Unassigned | Unassigned | Unassigned | 1357_0 | Clustered | 7 VC_1357_0   | 7   | 1      | 1          | 1      | 0 | 0 | 0 | 1 Ref |
| MG945396 | Unassigned | Unassigned | Unassigned | 1299_0 | Clustered | 53 VC_1299_0  | 53  | 0.8666 | 1          | 0.8666 | 0 | 0 | 0 | 1 Ref |
| MG945398 | Unassigned | Unassigned | Unassigned | 1145_0 | Clustered | 164 VC_1145_0 | 164 | 0.8868 | 1          | 0.8868 | 0 | 0 | 0 | 1 Ref |
| MG945399 | Unassigned | Unassigned | Unassigned | 1147_0 | Clustered | 6 VC_1147_0   | 6   | 0.3066 | 0.99999957 | 0.3066 | 0 | 0 | 0 | 1 Ref |
| MG945401 | Unassigned | Unassigned | Unassigned | 1308_0 | Clustered | 15 VC_1308_0  | 15  | 0.9074 | 1          | 0.9074 | 0 | 0 | 0 | 1 Ref |
| MG945402 | Unassigned | Unassigned | Unassigned | 1145_0 | Clustered | 164 VC_1145_0 | 164 | 0.8868 | 1          | 0.8868 | 0 | 0 | 0 | 1 Ref |
| MG945403 | Unassigned | Unassigned | Unassigned | 1155_0 | Clustered | 14 VC_1155_0  | 14  | 0.8287 | 1          | 0.8287 | 0 | 0 | 0 | 1 Ref |
| MG945404 | Unassigned | Unassigned | Unassigned | 1325_0 | Clustered | 7 VC_1325_0   | 7   | 1      | 1          | 1      | 0 | 0 | 0 | 1 Ref |
| MG945405 | Unassigned | Unassigned | Unassigned | 1187_0 | Clustered | 3 VC_1187_0   | 3   | 0.5022 | 0.99747895 | 0.501  | 0 | 0 | 0 | 1 Ref |
| MG945407 | Unassigned | Unassigned | Unassigned | 1145_0 | Clustered | 164 VC_1145_0 | 164 | 0.8868 | 1          | 0.8868 | 0 | 0 | 0 | 1 Ref |
| MG945408 | Unassigned | Unassigned | Unassigned | 1324_0 | Clustered | 5 VC_1324_0   | 5   | 1      | 1          | 1      | 0 | 0 | 0 | 1 Ref |
| MG945409 | Unassigned | Unassigned | Unassigned | 1360_0 | Clustered | 2 VC_1360_0   | 2   | 1      | 1          | 1      | 0 | 0 | 0 | 1 Ref |
| MG945410 | Unassigned | Unassigned | Unassigned | 1152_0 | Clustered | 26 VC_1152_0  | 26  | 0.6685 | 1          | 0.6685 | 0 | 0 | 0 | 1 Ref |
| MG945411 | Unassigned | Unassigned | Unassigned | 1318_0 | Clustered | 5 VC_1318_0   | 5   | 0.764  | 0.99993003 | 0.7639 | 0 | 0 | 0 | 1 Ref |
| MG945412 | Unassigned | Unassigned | Unassigned | 1361_0 | Clustered | 2 VC_1361_0   | 2   | 0.6617 | 0.72985431 | 0.4820 | 0 | 0 | 0 | 1 Ref |
| MG945413 | Unassigned | Unassigned | Unassigned | 1189_0 | Clustered | 16 VC_1189_0  | 16  | 0.8814 | 1          | 0.8814 | 0 | 0 | 0 | 1 Ref |
| MG945414 | Unassigned | Unassigned | Unassigned | 1310_0 | Clustered | 6 VC_1310_0   | 6   | 0.6075 | 1          | 0.6075 | 0 | 0 | 0 | 1 Ref |
| MG945415 | Unassigned | Unassigned | Unassigned | 1145_0 | Clustered | 164 VC_1145_0 | 164 | 0.8868 | 1          | 0.8868 | 0 | 0 | 0 | 1 Ref |
| MG945416 | Unassigned | Unassigned | Unassigned | 1152_0 | Clustered | 26 VC_1152_0  | 26  | 0.6685 | 1          | 0.6685 | 0 | 0 | 0 | 1 Ref |
| MG945417 | Unassigned | Unassigned | Unassigned | 1362_0 | Clustered | 2 VC_1362_0   | 2   | 1      | 1          | 1      | 0 | 0 | 0 | 1 Ref |
| MG945418 | Unassigned | Unassigned | Unassigned | 1162_0 | Clustered | 3 VC_1162_0   | 3   | 0.6188 | 0.98688028 | 0.6106 | 0 | 0 | 0 | 1 Ref |
| MG945419 | Unassigned | Unassigned | Unassigned | 1362_0 | Clustered | 2 VC_1362_0   | 2   | 1      | 1          | 1      | 0 | 0 | 0 | 1 Ref |
| MG945420 | Unassigned | Unassigned | Unassigned | 1322_0 | Clustered | 6 VC_1322_0   | 6   | 0.7063 | 0.92055725 | 0.6502 | 0 | 0 | 0 | 1 Ref |
| MG945421 | Unassigned | Unassigned | Unassigned | 1357_0 | Clustered | 7 VC_1357_0   | 7   | 1      | 1          | 1      | 0 | 0 | 0 | 1 Ref |
| MG945424 | Unassigned | Unassigned | Unassigned | 1145_0 | Clustered | 164 VC_1145_0 | 164 | 0.8868 | 1          | 0.8868 | 0 | 0 | 0 | 1 Ref |
| MG945425 | Unassigned | Unassigned | Unassigned | 1337_0 | Clustered | 3 VC_1337_0   | 3   | 0.394  | 0.99705286 | 0.3928 | 0 | 0 | 0 | 1 Ref |
| MG945426 | Unassigned | Unassigned | Unassigned | 1191_0 | Clustered | 9 VC_1191_0   | 9   | 0.8537 | 1          | 0.8537 | 0 | 0 | 0 | 1 Ref |
| MG945427 | Unassigned | Unassigned | Unassigned | 1363_0 | Clustered | 3 VC_1363_0   | 3   | 1      | 1          | 1      | 0 | 0 | 0 | 1 Ref |
| MG945429 | Unassigned | Unassigned | Unassigned | 1145_0 | Clustered | 164 VC_1145_0 | 164 | 0.8868 | 1          | 0.8868 | 0 | 0 | 0 | 1 Ref |
| MG945430 | Unassigned | Unassigned | Unassigned | 1170_0 | Clustered | 19 VC_1170_0  | 19  | 0.7497 | 1          | 0.7497 | 0 | 0 | 0 | 1 Ref |
| MG945431 | Unassigned | Unassigned | Unassigned | 1146_0 | Clustered | 3 VC_1146_0   | 3   | 0.3655 | 0.99631816 | 0.3642 | 0 | 0 | 0 | 1 Ref |
| MG945432 | Unassigned | Unassigned | Unassigned | 1353_0 | Clustered | 4 VC_1353_0   | 4   | 0.7838 | 0.99289298 | 0.7782 | 0 | 0 | 0 | 1 Ref |
| MG945433 | Unassigned | Unassigned | Unassigned | 1343_0 | Clustered | 2 VC_1343_0   | 2   | 1      | 1          | 1      | 0 | 0 | 0 | 1 Ref |
| MG945434 | Unassigned | Unassigned | Unassigned | 1338_0 | Clustered | 4 VC_1338_0   | 4   | 0.6053 | 0.76972092 | 0.4659 | 0 | 0 | 0 | 1 Ref |
| MG945435 | Unassigned | Unassigned | Unassigned | 1145_0 | Clustered | 164 VC_1145_0 | 164 | 0.8868 | 1          | 0.8868 | 0 | 0 | 0 | 1 Ref |
| MG945437 | Unassigned | Unassigned | Unassigned | 1152_0 | Clustered | 26 VC_1152_0  | 26  | 0.6685 | 1          | 0.6685 | 0 | 0 | 0 | 1 Ref |
| MG945438 | Unassigned | Unassigned | Unassigned | 1145_0 | Clustered | 164 VC_1145_0 | 164 | 0.8868 | 1          | 0.8868 | 0 | 0 | 0 | 1 Ref |
| MG945439 | Unassigned | Unassigned | Unassigned | 1364_0 | Clustered | 6 VC_1364_0   | 6   | 0.9472 | 0.54366909 | 0.515  | 0 | 0 | 0 | 1 Ref |
| MG945441 | Unassigned | Unassigned | Unassigned | 1190_0 | Clustered | 5 VC_1190_0   | 5   | 0.4604 | 0.99999982 | 0.4604 | 0 | 0 | 0 | 1 Ref |
| MG945444 | Unassigned | Unassigned | Unassigned | 1145_0 | Clustered | 164 VC_1145_0 | 164 | 0.8868 | 1          | 0.8868 | 0 | 0 | 0 | 1 Ref |
| MG945445 | Unassigned | Unassigned | Unassigned | 1310_0 | Clustered | 6 VC_1310_0   | 6   | 0.6075 | 1          | 0.6075 | 0 | 0 | 0 | 1 Ref |
| MG945447 | Unassigned | Unassigned | Unassigned | 1170_0 | Clustered | 19 VC_1170_0  | 19  | 0.7497 | 1          | 0.7497 | 0 | 0 | 0 | 1 Ref |
| MG945448 | Unassigned | Unassigned | Unassigned | 1313_0 | Clustered | 4 VC_1313_0   | 4   | 0.5804 | 0.94751743 | 0.5499 | 0 | 0 | 0 | 1 Ref |
| MG945449 | Unassigned | Unassigned | Unassigned | 1314_0 | Clustered | 6 VC_1314_0   | 6   | 0.6504 | 0.99999969 | 0.6504 | 0 | 0 | 0 | 1 Ref |
| MG945452 | Unassigned | Unassigned | Unassigned | 1299_0 | Clustered | 53 VC_1299_0  | 53  | 0.8666 | 1          | 0.8666 | 0 | 0 | 0 | 1 Ref |
| MG945453 | Unassigned | Unassigned | Unassigned | 1267_0 | Clustered | 26 VC_1267_0  | 26  | 0.9597 | 0.99999998 | 0.9597 | 0 | 0 | 0 | 1 Ref |
| MG945455 | Unassigned | Unassigned | Unassigned | 1267_0 | Clustered | 26 VC_1267_0  | 26  | 0.9597 | 0.99999998 | 0.9597 | 0 | 0 | 0 | 1 Ref |
| MG945456 | Unassigned | Unassigned | Unassigned | 1267_0 | Clustered | 26 VC_1267_0  | 26  | 0.9597 | 0.99999998 | 0.9597 | 0 | 0 | 0 | 1 Ref |
| MG945457 | Unassigned | Unassigned | Unassigned | 1286_0 | Clustered | 16 VC_1286_0  | 16  | 0.9448 | 1          | 0.9448 | 0 | 0 | 0 | 1 Ref |
| MG945458 | Unassigned | Unassigned | Unassigned | 1314_0 | Clustered | 6 VC_1314_0   | 6   | 0.6504 | 0.99999969 | 0.6504 | 0 | 0 | 0 | 1 Ref |
| MG945459 | Unassigned | Unassigned | Unassigned | 1145_0 | Clustered | 164 VC_1145_0 | 164 | 0.8868 | 1          | 0.8868 | 0 | 0 | 0 | 1 Ref |
| MG945461 | Unassigned | Unassigned | Unassigned | 1145_0 | Clustered | 164 VC_1145_0 | 164 | 0.8868 | 1          | 0.8868 | 0 | 0 | 0 | 1 Ref |
| MG945462 | Unassigned | Unassigned | Unassigned | 1318_0 | Clustered | 5 VC_1318_0   | 5   | 0.764  | 0.99993003 | 0.7639 | 0 | 0 | 0 | 1 Ref |
| MG945463 | Unassigned | Unassigned | Unassigned | 1104_0 | Clustered | 44 VC_1104_0  | 44  | 0.9574 | 0.72818579 | 0.6972 | 0 | 0 | 0 | 1 Ref |
| MG945464 | Unassigned | Unassigned | Unassigned | 1302_0 | Clustered | 2 VC_1302_0   | 2   | 1      | 1          | 1      | 0 | 0 | 0 | 1 Ref |
| MG945465 | Unassigned | Unassigned | Unassigned | 1028_0 | Clustered | 69 VC_1028_0  | 69  | 0.8547 | 1          | 0.8547 | 0 | 0 | 0 | 1 Ref |



|          |            |            |            |        |           |               |     |        |            |        |   |   |   |       |
|----------|------------|------------|------------|--------|-----------|---------------|-----|--------|------------|--------|---|---|---|-------|
| MG945467 | Unassigned | Unassigned | Unassigned | 1145_0 | Clustered | 164 VC_1145_0 | 164 | 0.8868 | 1          | 0.8868 | 0 | 0 | 0 | 1 Ref |
| MG945468 | Unassigned | Unassigned | Unassigned | 1346_0 | Clustered | 25 VC_1346_0  | 25  | 1      | 1          | 1      | 0 | 0 | 0 | 1 Ref |
| MG945469 | Unassigned | Unassigned | Unassigned | 1367_0 | Clustered | 5 VC_1367_0   | 5   | 0.7699 | 0.66985041 | 0.5157 | 0 | 0 | 0 | 1 Ref |
| MG945470 | Unassigned | Unassigned | Unassigned | 1322_0 | Clustered | 6 VC_1322_0   | 6   | 0.7063 | 0.92055725 | 0.6502 | 0 | 0 | 0 | 1 Ref |
| MG945472 | Unassigned | Unassigned | Unassigned | 1161_0 | Clustered | 16 VC_1161_0  | 16  | 0.4834 | 0.99999958 | 0.4834 | 0 | 0 | 0 | 1 Ref |
| MG945473 | Unassigned | Unassigned | Unassigned | 1095_0 | Clustered | 12 VC_1095_0  | 12  | 0.2819 | 0.99837092 | 0.2814 | 0 | 0 | 0 | 1 Ref |
| MG945475 | Unassigned | Unassigned | Unassigned | 1127_0 | Clustered | 2 VC_1127_0   | 2   | 0.5888 | 0.9331928  | 0.5494 | 0 | 0 | 0 | 1 Ref |
| MG945476 | Unassigned | Unassigned | Unassigned | 1145_0 | Clustered | 164 VC_1145_0 | 164 | 0.8868 | 1          | 0.8868 | 0 | 0 | 0 | 1 Ref |
| MG945477 | Unassigned | Unassigned | Unassigned | 1028_0 | Clustered | 69 VC_1028_0  | 69  | 0.8547 | 1          | 0.8547 | 0 | 0 | 0 | 1 Ref |
| MG945478 | Unassigned | Unassigned | Unassigned | 1355_0 | Clustered | 3 VC_1355_0   | 3   | 1      | 0          | 0      | 0 | 0 | 0 | 1 Ref |
| MG945480 | Unassigned | Unassigned | Unassigned | 1357_0 | Clustered | 7 VC_1357_0   | 7   | 1      | 1          | 1      | 0 | 0 | 0 | 1 Ref |
| MG945481 | Unassigned | Unassigned | Unassigned | 1156_0 | Clustered | 5 VC_1156_0   | 5   | 0.4454 | 0.99999977 | 0.4454 | 0 | 0 | 0 | 1 Ref |
| MG945482 | Unassigned | Unassigned | Unassigned | 1304_0 | Clustered | 7 VC_1304_0   | 7   | 0.9079 | 0.99998959 | 0.9079 | 0 | 0 | 0 | 1 Ref |
| MG945483 | Unassigned | Unassigned | Unassigned | 1368_0 | Clustered | 2 VC_1368_0   | 2   | 1      | 1          | 1      | 0 | 0 | 0 | 1 Ref |
| MG945485 | Unassigned | Unassigned | Unassigned | 1299_0 | Clustered | 53 VC_1299_0  | 53  | 0.8666 | 1          | 0.8666 | 0 | 0 | 0 | 1 Ref |
| MG945486 | Unassigned | Unassigned | Unassigned | 1145_0 | Clustered | 164 VC_1145_0 | 164 | 0.8868 | 1          | 0.8868 | 0 | 0 | 0 | 1 Ref |
| MG945487 | Unassigned | Unassigned | Unassigned | 1190_0 | Clustered | 5 VC_1190_0   | 5   | 0.4604 | 0.99999982 | 0.4604 | 0 | 0 | 0 | 1 Ref |
| MG945488 | Unassigned | Unassigned | Unassigned | 1334_0 | Clustered | 7 VC_1334_0   | 7   | 0.6918 | 1          | 0.6918 | 0 | 0 | 0 | 1 Ref |
| MG945489 | Unassigned | Unassigned | Unassigned | 1150_0 | Clustered | 2 VC_1150_0   | 2   | 0.2628 | 0.89847992 | 0.2361 | 0 | 0 | 0 | 1 Ref |
| MG945490 | Unassigned | Unassigned | Unassigned | 1348_0 | Clustered | 7 VC_1348_0   | 7   | 1      | 1          | 1      | 0 | 0 | 0 | 1 Ref |
| MG945492 | Unassigned | Unassigned | Unassigned | 1340_0 | Clustered | 7 VC_1340_0   | 7   | 0.9206 | 0.99995294 | 0.9206 | 0 | 0 | 0 | 1 Ref |
| MG945494 | Unassigned | Unassigned | Unassigned | 1335_0 | Clustered | 13 VC_1335_0  | 13  | 0.7519 | 1          | 0.7519 | 0 | 0 | 0 | 1 Ref |
| MG945495 | Unassigned | Unassigned | Unassigned | 1318_0 | Clustered | 5 VC_1318_0   | 5   | 0.764  | 0.99993003 | 0.7639 | 0 | 0 | 0 | 1 Ref |
| MG945497 | Unassigned | Unassigned | Unassigned | 1285_0 | Clustered | 3 VC_1285_0   | 3   | 0.7418 | 0.80676188 | 0.5984 | 0 | 0 | 0 | 1 Ref |
| MG945498 | Unassigned | Unassigned | Unassigned | 1267_0 | Clustered | 26 VC_1267_0  | 26  | 0.9597 | 0.99999998 | 0.9597 | 0 | 0 | 0 | 1 Ref |
| MG945499 | Unassigned | Unassigned | Unassigned | 1145_0 | Clustered | 164 VC_1145_0 | 164 | 0.8868 | 1          | 0.8868 | 0 | 0 | 0 | 1 Ref |
| MG945500 | Unassigned | Unassigned | Unassigned | 1369_0 | Clustered | 10 VC_1369_0  | 10  | 0.6223 | 0.95845085 | 0.5964 | 0 | 0 | 0 | 1 Ref |
| MG945501 | Unassigned | Unassigned | Unassigned | 1348_0 | Clustered | 7 VC_1348_0   | 7   | 1      | 1          | 1      | 0 | 0 | 0 | 1 Ref |
| MG945502 | Unassigned | Unassigned | Unassigned | 1241_0 | Clustered | 13 VC_1241_0  | 13  | 0.8675 | 0.76044592 | 0.6597 | 0 | 0 | 0 | 1 Ref |
| MG945504 | Unassigned | Unassigned | Unassigned | 1373_0 | Clustered | 2 VC_1373_0   | 2   | 1      | 1          | 1      | 0 | 0 | 0 | 1 Ref |
| MG945505 | Unassigned | Unassigned | Unassigned | 1190_0 | Clustered | 5 VC_1190_0   | 5   | 0.4604 | 0.99999982 | 0.4604 | 0 | 0 | 0 | 1 Ref |
| MG945506 | Unassigned | Unassigned | Unassigned | 1189_0 | Clustered | 16 VC_1189_0  | 16  | 0.8814 | 1          | 0.8814 | 0 | 0 | 0 | 1 Ref |
| MG945507 | Unassigned | Unassigned | Unassigned | 1189_0 | Clustered | 16 VC_1189_0  | 16  | 0.8814 | 1          | 0.8814 | 0 | 0 | 0 | 1 Ref |
| MG945508 | Unassigned | Unassigned | Unassigned | 1145_0 | Clustered | 164 VC_1145_0 | 164 | 0.8868 | 1          | 0.8868 | 0 | 0 | 0 | 1 Ref |
| MG945509 | Unassigned | Unassigned | Unassigned | 1267_0 | Clustered | 26 VC_1267_0  | 26  | 0.9597 | 0.99999998 | 0.9597 | 0 | 0 | 0 | 1 Ref |
| MG945511 | Unassigned | Unassigned | Unassigned | 1299_0 | Clustered | 53 VC_1299_0  | 53  | 0.8666 | 1          | 0.8666 | 0 | 0 | 0 | 1 Ref |
| MG945512 | Unassigned | Unassigned | Unassigned | 1316_0 | Clustered | 8 VC_1316_0   | 8   | 0.821  | 1          | 0.821  | 0 | 0 | 0 | 1 Ref |
| MG945514 | Unassigned | Unassigned | Unassigned | 1170_0 | Clustered | 19 VC_1170_0  | 19  | 0.7497 | 1          | 0.7497 | 0 | 0 | 0 | 1 Ref |
| MG945515 | Unassigned | Unassigned | Unassigned | 1299_0 | Clustered | 53 VC_1299_0  | 53  | 0.8666 | 1          | 0.8666 | 0 | 0 | 0 | 1 Ref |
| MG945517 | Unassigned | Unassigned | Unassigned | 1145_0 | Clustered | 164 VC_1145_0 | 164 | 0.8868 | 1          | 0.8868 | 0 | 0 | 0 | 1 Ref |
| MG945518 | Unassigned | Unassigned | Unassigned | 1322_0 | Clustered | 6 VC_1322_0   | 6   | 0.7063 | 0.92055725 | 0.6502 | 0 | 0 | 0 | 1 Ref |
| MG945519 | Unassigned | Unassigned | Unassigned | 1179_0 | Clustered | 4 VC_1179_0   | 4   | 0.9241 | 0.99468305 | 0.9191 | 0 | 0 | 0 | 1 Ref |
| MG945520 | Unassigned | Unassigned | Unassigned | 690_0  | Clustered | 12 VC_690_0   | 12  | 1      | 1          | 1      | 0 | 0 | 0 | 1 Ref |
| MG945524 | Unassigned | Unassigned | Unassigned | 1346_0 | Clustered | 25 VC_1346_0  | 25  | 1      | 1          | 1      | 0 | 0 | 0 | 1 Ref |
| MG945525 | Unassigned | Unassigned | Unassigned | 1185_0 | Clustered | 7 VC_1185_0   | 7   | 0.6862 | 1          | 0.6862 | 0 | 0 | 0 | 1 Ref |
| MG945526 | Unassigned | Unassigned | Unassigned | 1145_0 | Clustered | 164 VC_1145_0 | 164 | 0.8868 | 1          | 0.8868 | 0 | 0 | 0 | 1 Ref |
| MG945529 | Unassigned | Unassigned | Unassigned | 1164_0 | Clustered | 5 VC_1164_0   | 5   | 0.831  | 0.99879053 | 0.83   | 0 | 0 | 0 | 1 Ref |
| MG945531 | Unassigned | Unassigned | Unassigned | 1145_0 | Clustered | 164 VC_1145_0 | 164 | 0.8868 | 1          | 0.8868 | 0 | 0 | 0 | 1 Ref |
| MG945533 | Unassigned | Unassigned | Unassigned | 1374_0 | Clustered | 3 VC_1374_0   | 3   | 1      | 1          | 1      | 0 | 0 | 0 | 1 Ref |
| MG945534 | Unassigned | Unassigned | Unassigned | 1161_0 | Clustered | 16 VC_1161_0  | 16  | 0.4834 | 0.99999958 | 0.4834 | 0 | 0 | 0 | 1 Ref |
| MG945538 | Unassigned | Unassigned | Unassigned | 1152_0 | Clustered | 26 VC_1152_0  | 26  | 0.6685 | 1          | 0.6685 | 0 | 0 | 0 | 1 Ref |
| MG945539 | Unassigned | Unassigned | Unassigned | 1357_0 | Clustered | 7 VC_1357_0   | 7   | 1      | 1          | 1      | 0 | 0 | 0 | 1 Ref |
| MG945540 | Unassigned | Unassigned | Unassigned | 1316_0 | Clustered | 8 VC_1316_0   | 8   | 0.821  | 1          | 0.821  | 0 | 0 | 0 | 1 Ref |
| MG945541 | Unassigned | Unassigned | Unassigned | 1145_0 | Clustered | 164 VC_1145_0 | 164 | 0.8868 | 1          | 0.8868 | 0 | 0 | 0 | 1 Ref |
| MG945542 | Unassigned | Unassigned | Unassigned | 1155_0 | Clustered | 14 VC_1155_0  | 14  | 0.8287 | 1          | 0.8287 | 0 | 0 | 0 | 1 Ref |
| MG945544 | Unassigned | Unassigned | Unassigned | 1309_0 | Clustered | 3 VC_1309_0   | 3   | 0.3217 | 0.99790393 | 0.321  | 0 | 0 | 0 | 1 Ref |
| MG945546 | Unassigned | Unassigned | Unassigned | 206_0  | Clustered | 28 VC_206_0   | 28  | 0.2427 | 0.99971175 | 0.2426 | 0 | 0 | 0 | 1 Ref |
| MG945548 | Unassigned | Unassigned | Unassigned | 1145_0 | Clustered | 164 VC_1145_0 | 164 | 0.8868 | 1          | 0.8868 | 0 | 0 | 0 | 1 Ref |
| MG945549 | Unassigned | Unassigned | Unassigned | 1162_0 | Clustered | 3 VC_1162_0   | 3   | 0.6188 | 0.98688028 | 0.6106 | 0 | 0 | 0 | 1 Ref |
| MG945550 | Unassigned | Unassigned | Unassigned | 1155_0 | Clustered | 14 VC_1155_0  | 14  | 0.8287 | 1          | 0.8287 | 0 | 0 | 0 | 1 Ref |
| MG945551 | Unassigned | Unassigned | Unassigned | 690_0  | Clustered | 12 VC_690_0   | 12  | 1      | 1          | 1      | 0 | 0 | 0 | 1 Ref |
| MG945553 | Unassigned | Unassigned | Unassigned | 1320_0 | Clustered | 10 VC_1320_0  | 10  | 0.8478 | 1          | 0.8478 | 0 | 0 | 0 | 1 Ref |
| MG945554 | Unassigned | Unassigned | Unassigned | 1382_0 | Clustered | 2 VC_1382_0   | 2   | 1      | 1          | 1      | 0 | 0 | 0 | 1 Ref |
| MG945556 | Unassigned | Unassigned | Unassigned | 1346_0 | Clustered | 25 VC_1346_0  | 25  | 1      | 1          | 1      | 0 | 0 | 0 | 1 Ref |
| MG945557 | Unassigned | Unassigned | Unassigned | 1286_0 | Clustered | 16 VC_1286_0  | 16  | 0.9448 | 1          | 0.9448 | 0 | 0 | 0 | 1 Ref |
| MG945559 | Unassigned | Unassigned | Unassigned | 1145_0 | Clustered | 164 VC_1145_0 | 164 | 0.8868 | 1          | 0.8868 | 0 | 0 | 0 | 1 Ref |
| MG945561 | Unassigned | Unassigned | Unassigned | 1180_0 | Clustered | 4 VC_1180_0   | 4   | 1      | 1          | 1      | 0 | 0 | 0 | 1 Ref |
| MG945562 | Unassigned | Unassigned | Unassigned | 1346_0 | Clustered | 25 VC_1346_0  | 25  | 1      | 1          | 1      | 0 | 0 | 0 | 1 Ref |
| MG945563 | Unassigned | Unassigned | Unassigned | 1335_0 | Clustered | 13 VC_1335_0  | 13  | 0.7519 | 1          | 0.7519 | 0 | 0 | 0 | 1 Ref |
| MG945564 | Unassigned | Unassigned | Unassigned | 1267_0 | Clustered | 26 VC_1267_0  | 26  | 0.9597 | 0.99999998 | 0.9597 | 0 | 0 | 0 | 1 Ref |
| MG945565 | Unassigned | Unassigned | Unassigned | 1145_0 | Clustered | 164 VC_1145_0 | 164 | 0.8868 | 1          | 0.8868 | 0 | 0 | 0 | 1 Ref |
| MG945566 | Unassigned | Unassigned | Unassigned | 1145_0 | Clustered | 164 VC_1145_0 | 164 | 0.8868 | 1          | 0.8868 | 0 | 0 | 0 | 1 Ref |
| MG945567 | Unassigned | Unassigned | Unassigned | 1332_0 | Clustered | 2 VC_1332_0   | 2   | 0.6366 | 0.72985431 | 0.4646 | 0 | 0 | 0 | 1 Ref |
| MG945568 | Unassigned | Unassigned | Unassigned | 1164_0 | Clustered | 5 VC_1164_0   | 5   | 0.831  | 0.99879053 | 0.83   | 0 | 0 | 0 | 1 Ref |
| MG945569 | Unassigned | Unassigned | Unassigned | 1165_0 | Clustered | 10 VC_1165_0  | 10  | 0.9263 | 1          | 0.9263 | 0 | 0 | 0 | 1 Ref |
| MG945570 | Unassigned | Unassigned | Unassigned | 1145_0 | Clustered | 164 VC_1145_0 | 164 | 0.8868 | 1          | 0.8868 | 0 | 0 | 0 | 1 Ref |
| MG945571 | Unassigned | Unassigned | Unassigned | 206_0  | Clustered | 28 VC_206_0   | 28  | 0.2427 | 0.99971175 | 0.2426 | 0 | 0 | 0 | 1 Ref |
| MG945572 | Unassigned | Unassigned | Unassigned | 1334_0 | Clustered | 7 VC_1334_0   | 7   | 0.6918 | 1          | 0.6918 | 0 | 0 | 0 | 1 Ref |
| MG945573 | Unassigned | Unassigned | Unassigned | 1184_0 | Clustered | 10 VC_1184_0  | 10  | 0.7506 | 1          | 0.7506 | 0 | 0 | 0 | 1 Ref |
| MG945574 | Unassigned | Unassigned | Unassigned | 1363_0 | Clustered | 3 VC_1363_0   | 3   | 1      | 1          | 1      | 0 | 0 | 0 | 1 Ref |
| MG945575 | Unassigned | Unassigned | Unassigned | 1382_0 | Clustered | 2 VC_1382_0   | 2   | 1      | 1          | 1      | 0 | 0 | 0 | 1 Ref |



|          |            |            |            |        |                     |               |     |        |            |        |   |   |   |       |
|----------|------------|------------|------------|--------|---------------------|---------------|-----|--------|------------|--------|---|---|---|-------|
| MG945576 | Unassigned | Unassigned | Unassigned | 1354_0 | Clustered           | 6 VC_1354_0   | 6   | 0.6609 | 0.99999272 | 0.6609 | 0 | 0 | 0 | 1 Ref |
| MG945578 | Unassigned | Unassigned | Unassigned | 1310_0 | Clustered           | 6 VC_1310_0   | 6   | 0.6075 | 1          | 0.6075 | 0 | 0 | 0 | 1 Ref |
| MG945579 | Unassigned | Unassigned | Unassigned | 1346_0 | Clustered           | 25 VC_1346_0  | 25  | 1      | 1          | 1      | 0 | 0 | 0 | 1 Ref |
| MG945580 | Unassigned | Unassigned | Unassigned | 1315_0 | Clustered           | 3 VC_1315_0   | 3   | 0.2423 | 0.85925819 | 0.2082 | 0 | 0 | 0 | 1 Ref |
| MG945582 | Unassigned | Unassigned | Unassigned | 1326_0 | Clustered           | 3 VC_1326_0   | 3   | 0.0804 | 0.6862532  | 0.0552 | 0 | 0 | 0 | 1 Ref |
| MG945584 | Unassigned | Unassigned | Unassigned | 1333_0 | Clustered           | 4 VC_1333_0   | 4   | 1      | 1          | 1      | 0 | 0 | 0 | 1 Ref |
| MG945585 | Unassigned | Unassigned | Unassigned | 1335_0 | Clustered           | 13 VC_1335_0  | 13  | 0.7519 | 1          | 0.7519 | 0 | 0 | 0 | 1 Ref |
| MG945586 | Unassigned | Unassigned | Unassigned | 1145_0 | Clustered           | 164 VC_1145_0 | 164 | 0.8868 | 1          | 0.8868 | 0 | 0 | 0 | 1 Ref |
| MG945587 | Unassigned | Unassigned | Unassigned | 1145_0 | Clustered           | 164 VC_1145_0 | 164 | 0.8868 | 1          | 0.8868 | 0 | 0 | 0 | 1 Ref |
| MG945589 | Unassigned | Unassigned | Unassigned | 1145_0 | Clustered           | 164 VC_1145_0 | 164 | 0.8868 | 1          | 0.8868 | 0 | 0 | 0 | 1 Ref |
| MG945592 | Unassigned | Unassigned | Unassigned | 1145_0 | Clustered           | 164 VC_1145_0 | 164 | 0.8868 | 1          | 0.8868 | 0 | 0 | 0 | 1 Ref |
| MG945594 | Unassigned | Unassigned | Unassigned | 1094_0 | Clustered/Singleton | 1 VC_1094_0   | 1   | 0      | 1          | 0      | 0 | 0 | 0 | 1 Ref |
| MG945596 | Unassigned | Unassigned | Unassigned | 1145_0 | Clustered           | 164 VC_1145_0 | 164 | 0.8868 | 1          | 0.8868 | 0 | 0 | 0 | 1 Ref |
| MG945598 | Unassigned | Unassigned | Unassigned | 1385_0 | Clustered           | 4 VC_1385_0   | 4   | 0.1856 | 0.61974159 | 0.115  | 0 | 0 | 0 | 1 Ref |
| MG945600 | Unassigned | Unassigned | Unassigned | 1152_0 | Clustered           | 26 VC_1152_0  | 26  | 0.6685 | 1          | 0.6685 | 0 | 0 | 0 | 1 Ref |
| MG945602 | Unassigned | Unassigned | Unassigned | 1145_0 | Clustered           | 164 VC_1145_0 | 164 | 0.8868 | 1          | 0.8868 | 0 | 0 | 0 | 1 Ref |
| MG945605 | Unassigned | Unassigned | Unassigned | 1340_0 | Clustered           | 7 VC_1340_0   | 7   | 0.9206 | 0.99995294 | 0.9206 | 0 | 0 | 0 | 1 Ref |
| MG945609 | Unassigned | Unassigned | Unassigned | 1189_0 | Clustered           | 16 VC_1189_0  | 16  | 0.8814 | 1          | 0.8814 | 0 | 0 | 0 | 1 Ref |
| MG945611 | Unassigned | Unassigned | Unassigned | 1310_0 | Clustered           | 6 VC_1310_0   | 6   | 0.6075 | 1          | 0.6075 | 0 | 0 | 0 | 1 Ref |
| MG945612 | Unassigned | Unassigned | Unassigned | 1346_0 | Clustered           | 25 VC_1346_0  | 25  | 1      | 1          | 1      | 0 | 0 | 0 | 1 Ref |
| MG945614 | Unassigned | Unassigned | Unassigned | 1355_0 | Clustered           | 3 VC_1355_0   | 3   | 1      | 0          | 0      | 0 | 0 | 0 | 1 Ref |
| MG945615 | Unassigned | Unassigned | Unassigned | 1386_0 | Clustered           | 2 VC_1386_0   | 2   | 1      | 1          | 1      | 0 | 0 | 0 | 1 Ref |
| MG945616 | Unassigned | Unassigned | Unassigned | 1241_0 | Clustered           | 13 VC_1241_0  | 13  | 0.8675 | 0.76044592 | 0.6597 | 0 | 0 | 0 | 1 Ref |
| MG945617 | Unassigned | Unassigned | Unassigned | 1373_0 | Clustered           | 2 VC_1373_0   | 2   | 1      | 1          | 1      | 0 | 0 | 0 | 1 Ref |
| MG945618 | Unassigned | Unassigned | Unassigned | 1299_0 | Clustered           | 53 VC_1299_0  | 53  | 0.8666 | 1          | 0.8666 | 0 | 0 | 0 | 1 Ref |
| MG945619 | Unassigned | Unassigned | Unassigned | 1388_0 | Clustered           | 4 VC_1388_0   | 4   | 0.6008 | 0.54407361 | 0.3269 | 0 | 0 | 0 | 1 Ref |
| MG945620 | Unassigned | Unassigned | Unassigned | 1178_0 | Clustered           | 3 VC_1178_0   | 3   | 0.877  | 0.96173875 | 0.8434 | 0 | 0 | 0 | 1 Ref |
| MG945621 | Unassigned | Unassigned | Unassigned | 1369_0 | Clustered           | 10 VC_1369_0  | 10  | 0.6223 | 0.95845085 | 0.5964 | 0 | 0 | 0 | 1 Ref |
| MG945623 | Unassigned | Unassigned | Unassigned | 1238_0 | Clustered           | 5 VC_1238_0   | 5   | 0.5217 | 0.99999899 | 0.5217 | 0 | 0 | 0 | 1 Ref |
| MG945624 | Unassigned | Unassigned | Unassigned | 1173_0 | Clustered           | 3 VC_1173_0   | 3   | 0.0986 | 0.78721935 | 0.0776 | 0 | 0 | 0 | 1 Ref |
| MG945625 | Unassigned | Unassigned | Unassigned | 1307_0 | Clustered           | 5 VC_1307_0   | 5   | 0.6369 | 0.99918945 | 0.6364 | 0 | 0 | 0 | 1 Ref |
| MG945627 | Unassigned | Unassigned | Unassigned | 1152_0 | Clustered           | 26 VC_1152_0  | 26  | 0.6685 | 1          | 0.6685 | 0 | 0 | 0 | 1 Ref |
| MG945628 | Unassigned | Unassigned | Unassigned | 1364_0 | Clustered           | 6 VC_1364_0   | 6   | 0.9472 | 0.54366909 | 0.515  | 0 | 0 | 0 | 1 Ref |
| MG945629 | Unassigned | Unassigned | Unassigned | 1307_0 | Clustered           | 5 VC_1307_0   | 5   | 0.6369 | 0.99918945 | 0.6364 | 0 | 0 | 0 | 1 Ref |
| MG945631 | Unassigned | Unassigned | Unassigned | 1332_0 | Clustered           | 2 VC_1332_0   | 2   | 0.6366 | 0.72985431 | 0.4646 | 0 | 0 | 0 | 1 Ref |
| MG945632 | Unassigned | Unassigned | Unassigned | 1307_0 | Clustered           | 5 VC_1307_0   | 5   | 0.6369 | 0.99918945 | 0.6364 | 0 | 0 | 0 | 1 Ref |
| MG945633 | Unassigned | Unassigned | Unassigned | 1307_0 | Clustered           | 5 VC_1307_0   | 5   | 0.6369 | 0.99918945 | 0.6364 | 0 | 0 | 0 | 1 Ref |
| MG945634 | Unassigned | Unassigned | Unassigned | 1299_0 | Clustered           | 53 VC_1299_0  | 53  | 0.8666 | 1          | 0.8666 | 0 | 0 | 0 | 1 Ref |
| MG945635 | Unassigned | Unassigned | Unassigned | 1152_0 | Clustered           | 26 VC_1152_0  | 26  | 0.6685 | 1          | 0.6685 | 0 | 0 | 0 | 1 Ref |
| MG945637 | Unassigned | Unassigned | Unassigned | 1354_0 | Clustered           | 6 VC_1354_0   | 6   | 0.6609 | 0.99999272 | 0.6609 | 0 | 0 | 0 | 1 Ref |
| MG945639 | Unassigned | Unassigned | Unassigned | 1152_0 | Clustered           | 26 VC_1152_0  | 26  | 0.6685 | 1          | 0.6685 | 0 | 0 | 0 | 1 Ref |
| MG945640 | Unassigned | Unassigned | Unassigned | 1346_0 | Clustered           | 25 VC_1346_0  | 25  | 1      | 1          | 1      | 0 | 0 | 0 | 1 Ref |
| MG945641 | Unassigned | Unassigned | Unassigned | 1299_0 | Clustered           | 53 VC_1299_0  | 53  | 0.8666 | 1          | 0.8666 | 0 | 0 | 0 | 1 Ref |
| MG945642 | Unassigned | Unassigned | Unassigned | 1170_0 | Clustered           | 19 VC_1170_0  | 19  | 0.7497 | 1          | 0.7497 | 0 | 0 | 0 | 1 Ref |
| MG945643 | Unassigned | Unassigned | Unassigned | 1313_0 | Clustered           | 4 VC_1313_0   | 4   | 0.5804 | 0.94751743 | 0.5499 | 0 | 0 | 0 | 1 Ref |
| MG945644 | Unassigned | Unassigned | Unassigned | 1181_0 | Clustered           | 4 VC_1181_0   | 4   | 0.1325 | 0.65559538 | 0.0869 | 0 | 0 | 0 | 1 Ref |
| MG945645 | Unassigned | Unassigned | Unassigned | 1155_0 | Clustered           | 14 VC_1155_0  | 14  | 0.8287 | 1          | 0.8287 | 0 | 0 | 0 | 1 Ref |
| MG945646 | Unassigned | Unassigned | Unassigned | 1145_0 | Clustered           | 164 VC_1145_0 | 164 | 0.8868 | 1          | 0.8868 | 0 | 0 | 0 | 1 Ref |
| MG945647 | Unassigned | Unassigned | Unassigned | 1299_0 | Clustered           | 53 VC_1299_0  | 53  | 0.8666 | 1          | 0.8666 | 0 | 0 | 0 | 1 Ref |
| MG945662 | Unassigned | Unassigned | Unassigned | 1314_0 | Clustered           | 6 VC_1314_0   | 6   | 0.6504 | 0.99999969 | 0.6504 | 0 | 0 | 0 | 1 Ref |
| MG945663 | Unassigned | Unassigned | Unassigned | 1028_0 | Clustered           | 69 VC_1028_0  | 69  | 0.8547 | 1          | 0.8547 | 0 | 0 | 0 | 1 Ref |
| MG945664 | Unassigned | Unassigned | Unassigned | 1267_0 | Clustered           | 26 VC_1267_0  | 26  | 0.9597 | 0.99999998 | 0.9597 | 0 | 0 | 0 | 1 Ref |
| MG945665 | Unassigned | Unassigned | Unassigned | 1348_0 | Clustered           | 7 VC_1348_0   | 7   | 1      | 1          | 1      | 0 | 0 | 0 | 1 Ref |
| MG945667 | Unassigned | Unassigned | Unassigned | 1285_0 | Clustered           | 3 VC_1285_0   | 3   | 0.7418 | 0.80676188 | 0.5984 | 0 | 0 | 0 | 1 Ref |
| MG945668 | Unassigned | Unassigned | Unassigned | 1346_0 | Clustered           | 25 VC_1346_0  | 25  | 1      | 1          | 1      | 0 | 0 | 0 | 1 Ref |
| MG945669 | Unassigned | Unassigned | Unassigned | 206_0  | Clustered           | 28 VC_206_0   | 28  | 0.2427 | 0.99971175 | 0.2426 | 0 | 0 | 0 | 1 Ref |
| MG945670 | Unassigned | Unassigned | Unassigned | 1119_0 | Clustered           | 48 VC_1119_0  | 48  | 0.852  | 1          | 0.852  | 0 | 0 | 0 | 1 Ref |
| MG945671 | Unassigned | Unassigned | Unassigned | 1145_0 | Clustered           | 164 VC_1145_0 | 164 | 0.8868 | 1          | 0.8868 | 0 | 0 | 0 | 1 Ref |
| MG945672 | Unassigned | Unassigned | Unassigned | 1152_0 | Clustered           | 26 VC_1152_0  | 26  | 0.6685 | 1          | 0.6685 | 0 | 0 | 0 | 1 Ref |
| MG945673 | Unassigned | Unassigned | Unassigned | 1145_0 | Clustered           | 164 VC_1145_0 | 164 | 0.8868 | 1          | 0.8868 | 0 | 0 | 0 | 1 Ref |
| MG945674 | Unassigned | Unassigned | Unassigned | 1145_0 | Clustered           | 164 VC_1145_0 | 164 | 0.8868 | 1          | 0.8868 | 0 | 0 | 0 | 1 Ref |
| MG945676 | Unassigned | Unassigned | Unassigned | 1189_0 | Clustered           | 16 VC_1189_0  | 16  | 0.8814 | 1          | 0.8814 | 0 | 0 | 0 | 1 Ref |
| MG945678 | Unassigned | Unassigned | Unassigned | 1194_0 | Clustered           | 2 VC_1194_0   | 2   | 1      | 1          | 1      | 0 | 0 | 0 | 1 Ref |
| MG945680 | Unassigned | Unassigned | Unassigned | 1267_0 | Clustered           | 26 VC_1267_0  | 26  | 0.9597 | 0.99999998 | 0.9597 | 0 | 0 | 0 | 1 Ref |
| MG945681 | Unassigned | Unassigned | Unassigned | 1145_0 | Clustered           | 164 VC_1145_0 | 164 | 0.8868 | 1          | 0.8868 | 0 | 0 | 0 | 1 Ref |
| MG945682 | Unassigned | Unassigned | Unassigned | 411_0  | Clustered           | 48 VC_411_0   | 48  | 0.4808 | 1          | 0.4808 | 0 | 0 | 0 | 1 Ref |
| MG945683 | Unassigned | Unassigned | Unassigned | 1267_0 | Clustered           | 26 VC_1267_0  | 26  | 0.9597 | 0.99999998 | 0.9597 | 0 | 0 | 0 | 1 Ref |
| MG945685 | Unassigned | Unassigned | Unassigned | 1308_0 | Clustered           | 15 VC_1308_0  | 15  | 0.9074 | 1          | 0.9074 | 0 | 0 | 0 | 1 Ref |
| MG945686 | Unassigned | Unassigned | Unassigned | 690_0  | Clustered           | 12 VC_690_0   | 12  | 1      | 1          | 1      | 0 | 0 | 0 | 1 Ref |
| MG945687 | Unassigned | Unassigned | Unassigned | 1316_0 | Clustered           | 8 VC_1316_0   | 8   | 0.821  | 1          | 0.821  | 0 | 0 | 0 | 1 Ref |
| MG945689 | Unassigned | Unassigned | Unassigned | 1165_0 | Clustered           | 10 VC_1165_0  | 10  | 0.9263 | 1          | 0.9263 | 0 | 0 | 0 | 1 Ref |
| MG945690 | Unassigned | Unassigned | Unassigned | 1390_0 | Clustered           | 2 VC_1390_0   | 2   | 1      | 1          | 1      | 0 | 0 | 0 | 1 Ref |
| MG945691 | Unassigned | Unassigned | Unassigned | 1145_0 | Clustered           | 164 VC_1145_0 | 164 | 0.8868 | 1          | 0.8868 | 0 | 0 | 0 | 1 Ref |
| MG945692 | Unassigned | Unassigned | Unassigned | 1304_0 | Clustered           | 7 VC_1304_0   | 7   | 0.9079 | 0.99998959 | 0.9079 | 0 | 0 | 0 | 1 Ref |
| MG945693 | Unassigned | Unassigned | Unassigned | 1179_0 | Clustered           | 4 VC_1179_0   | 4   | 0.9241 | 0.99468305 | 0.9191 | 0 | 0 | 0 | 1 Ref |
| MG945694 | Unassigned | Unassigned | Unassigned | 1170_0 | Clustered           | 19 VC_1170_0  | 19  | 0.7497 | 1          | 0.7497 | 0 | 0 | 0 | 1 Ref |
| MG945696 | Unassigned | Unassigned | Unassigned | 1357_0 | Clustered           | 7 VC_1357_0   | 7   | 1      | 1          | 1      | 0 | 0 | 0 | 1 Ref |
| MG945697 | Unassigned | Unassigned | Unassigned | 1304_0 | Clustered           | 7 VC_1304_0   | 7   | 0.9079 | 0.99998959 | 0.9079 | 0 | 0 | 0 | 1 Ref |
| MG945698 | Unassigned | Unassigned | Unassigned | 1304_0 | Clustered           | 7 VC_1304_0   | 7   | 0.9079 | 0.99998959 | 0.9079 | 0 | 0 | 0 | 1 Ref |
| MG945699 | Unassigned | Unassigned | Unassigned | 1145_0 | Clustered           | 164 VC_1145_0 | 164 | 0.8868 | 1          | 0.8868 | 0 | 0 | 0 | 1 Ref |
| MG945700 | Unassigned | Unassigned | Unassigned | 1146_0 | Clustered           | 3 VC_1146_0   | 3   | 0.3655 | 0.99631816 | 0.3642 | 0 | 0 | 0 | 1 Ref |



|          |            |            |            |        |                     |     |           |     |        |             |        |   |   |   |   |     |
|----------|------------|------------|------------|--------|---------------------|-----|-----------|-----|--------|-------------|--------|---|---|---|---|-----|
| MG945702 | Unassigned | Unassigned | Unassigned | 1352_0 | Clustered           | 3   | VC_1352_0 | 3   | 1      | 1           | 1      | 0 | 0 | 0 | 1 | Ref |
| MG945703 | Unassigned | Unassigned | Unassigned | 1095_0 | Clustered           | 12  | VC_1095_0 | 12  | 0.2819 | 0.99837092  | 0.2814 | 0 | 0 | 0 | 1 | Ref |
| MG945705 | Unassigned | Unassigned | Unassigned | 1145_0 | Clustered           | 164 | VC_1145_0 | 164 | 0.8868 | 1           | 0.8868 | 0 | 0 | 0 | 1 | Ref |
| MG945706 | Unassigned | Unassigned | Unassigned | 1189_0 | Clustered           | 16  | VC_1189_0 | 16  | 0.8814 | 1           | 0.8814 | 0 | 0 | 0 | 1 | Ref |
| MG945707 | Unassigned | Unassigned | Unassigned | 1147_0 | Clustered           | 6   | VC_1147_0 | 6   | 0.3066 | 0.999999957 | 0.3066 | 0 | 0 | 0 | 1 | Ref |
| MG945708 | Unassigned | Unassigned | Unassigned | 1145_0 | Clustered           | 164 | VC_1145_0 | 164 | 0.8868 | 1           | 0.8868 | 0 | 0 | 0 | 1 | Ref |
| MG945710 | Unassigned | Unassigned | Unassigned | 1145_0 | Clustered           | 164 | VC_1145_0 | 164 | 0.8868 | 1           | 0.8868 | 0 | 0 | 0 | 1 | Ref |
| MG945712 | Unassigned | Unassigned | Unassigned | 1346_0 | Clustered           | 25  | VC_1346_0 | 25  | 1      | 1           | 1      | 0 | 0 | 0 | 1 | Ref |
| MG945713 | Unassigned | Unassigned | Unassigned | 1267_0 | Clustered           | 26  | VC_1267_0 | 26  | 0.9597 | 0.999999998 | 0.9597 | 0 | 0 | 0 | 1 | Ref |
| MG945715 | Unassigned | Unassigned | Unassigned | 1145_0 | Clustered           | 164 | VC_1145_0 | 164 | 0.8868 | 1           | 0.8868 | 0 | 0 | 0 | 1 | Ref |
| MG945716 | Unassigned | Unassigned | Unassigned | 1267_0 | Clustered           | 26  | VC_1267_0 | 26  | 0.9597 | 0.999999998 | 0.9597 | 0 | 0 | 0 | 1 | Ref |
| MG945717 | Unassigned | Unassigned | Unassigned | 1164_0 | Clustered           | 5   | VC_1164_0 | 5   | 0.831  | 0.99879053  | 0.83   | 0 | 0 | 0 | 1 | Ref |
| MG945718 | Unassigned | Unassigned | Unassigned | 1320_0 | Clustered           | 10  | VC_1320_0 | 10  | 0.8478 | 1           | 0.8478 | 0 | 0 | 0 | 1 | Ref |
| MG945719 | Unassigned | Unassigned | Unassigned | 1185_0 | Clustered           | 7   | VC_1185_0 | 7   | 0.6862 | 1           | 0.6862 | 0 | 0 | 0 | 1 | Ref |
| MG945721 | Unassigned | Unassigned | Unassigned | 1180_0 | Clustered           | 4   | VC_1180_0 | 4   | 1      | 1           | 1      | 0 | 0 | 0 | 1 | Ref |
| MG945723 | Unassigned | Unassigned | Unassigned | 1309_0 | Clustered           | 3   | VC_1309_0 | 3   | 0.3217 | 0.99790393  | 0.321  | 0 | 0 | 0 | 1 | Ref |
| MG945724 | Unassigned | Unassigned | Unassigned | 1306_0 | Clustered           | 4   | VC_1306_0 | 4   | 0.8184 | 0.99530591  | 0.8146 | 0 | 0 | 0 | 1 | Ref |
| MG945725 | Unassigned | Unassigned | Unassigned | 1286_0 | Clustered           | 16  | VC_1286_0 | 16  | 0.9448 | 1           | 0.9448 | 0 | 0 | 0 | 1 | Ref |
| MG945726 | Unassigned | Unassigned | Unassigned | 1191_0 | Clustered           | 9   | VC_1191_0 | 9   | 0.8537 | 1           | 0.8537 | 0 | 0 | 0 | 1 | Ref |
| MG945727 | Unassigned | Unassigned | Unassigned | 1192_0 | Clustered           | 4   | VC_1192_0 | 4   | 0.7187 | 0.99971165  | 0.7185 | 0 | 0 | 0 | 1 | Ref |
| MG945728 | Unassigned | Unassigned | Unassigned | 1145_0 | Clustered           | 164 | VC_1145_0 | 164 | 0.8868 | 1           | 0.8868 | 0 | 0 | 0 | 1 | Ref |
| MG945729 | Unassigned | Unassigned | Unassigned | 1348_0 | Clustered           | 7   | VC_1348_0 | 7   | 1      | 1           | 1      | 0 | 0 | 0 | 1 | Ref |
| MG945730 | Unassigned | Unassigned | Unassigned | 1267_0 | Clustered           | 26  | VC_1267_0 | 26  | 0.9597 | 0.999999998 | 0.9597 | 0 | 0 | 0 | 1 | Ref |
| MG945731 | Unassigned | Unassigned | Unassigned | 1145_0 | Clustered           | 164 | VC_1145_0 | 164 | 0.8868 | 1           | 0.8868 | 0 | 0 | 0 | 1 | Ref |
| MG945733 | Unassigned | Unassigned | Unassigned | 1346_0 | Clustered           | 25  | VC_1346_0 | 25  | 1      | 1           | 1      | 0 | 0 | 0 | 1 | Ref |
| MG945734 | Unassigned | Unassigned | Unassigned | 1304_0 | Clustered           | 7   | VC_1304_0 | 7   | 0.9079 | 0.99998959  | 0.9079 | 0 | 0 | 0 | 1 | Ref |
| MG945735 | Unassigned | Unassigned | Unassigned | 1237_0 | Clustered           | 3   | VC_1237_0 | 3   | 0.5448 | 0.99523779  | 0.5422 | 0 | 0 | 0 | 1 | Ref |
| MG945736 | Unassigned | Unassigned | Unassigned | 1155_0 | Clustered           | 14  | VC_1155_0 | 14  | 0.8287 | 1           | 0.8287 | 0 | 0 | 0 | 1 | Ref |
| MG945738 | Unassigned | Unassigned | Unassigned | 1173_0 | Clustered           | 3   | VC_1173_0 | 3   | 0.0986 | 0.78721935  | 0.0776 | 0 | 0 | 0 | 1 | Ref |
| MG945739 | Unassigned | Unassigned | Unassigned | 1164_0 | Clustered           | 5   | VC_1164_0 | 5   | 0.831  | 0.99879053  | 0.83   | 0 | 0 | 0 | 1 | Ref |
| MG945740 | Unassigned | Unassigned | Unassigned | 1155_0 | Clustered           | 14  | VC_1155_0 | 14  | 0.8287 | 1           | 0.8287 | 0 | 0 | 0 | 1 | Ref |
| MG945741 | Unassigned | Unassigned | Unassigned | 1178_0 | Clustered           | 3   | VC_1178_0 | 3   | 0.877  | 0.96173875  | 0.8434 | 0 | 0 | 0 | 1 | Ref |
| MG945742 | Unassigned | Unassigned | Unassigned | 1153_0 | Clustered           | 2   | VC_1153_0 | 2   | 0.0506 | 0.94785574  | 0.048  | 0 | 0 | 0 | 1 | Ref |
| MG945743 | Unassigned | Unassigned | Unassigned | 1299_0 | Clustered           | 53  | VC_1299_0 | 53  | 0.8666 | 1           | 0.8666 | 0 | 0 | 0 | 1 | Ref |
| MG945744 | Unassigned | Unassigned | Unassigned | 1145_0 | Clustered           | 164 | VC_1145_0 | 164 | 0.8868 | 1           | 0.8868 | 0 | 0 | 0 | 1 | Ref |
| MG945745 | Unassigned | Unassigned | Unassigned | 1308_0 | Clustered           | 15  | VC_1308_0 | 15  | 0.9074 | 1           | 0.9074 | 0 | 0 | 0 | 1 | Ref |
| MG945746 | Unassigned | Unassigned | Unassigned | 1152_0 | Clustered           | 26  | VC_1152_0 | 26  | 0.6685 | 1           | 0.6685 | 0 | 0 | 0 | 1 | Ref |
| MG945747 | Unassigned | Unassigned | Unassigned | 1162_0 | Clustered           | 3   | VC_1162_0 | 3   | 0.6188 | 0.98688028  | 0.6106 | 0 | 0 | 0 | 1 | Ref |
| MG945748 | Unassigned | Unassigned | Unassigned | 1240_0 | Clustered           | 3   | VC_1240_0 | 3   | 0.3359 | 0.99743975  | 0.3351 | 0 | 0 | 0 | 1 | Ref |
| MG945749 | Unassigned | Unassigned | Unassigned | 1365_0 | Clustered/Singleton | 1   | VC_1365_0 | 1   | 0      | 1           | 0      | 0 | 0 | 0 | 1 | Ref |
| MG945750 | Unassigned | Unassigned | Unassigned | 1325_0 | Clustered           | 7   | VC_1325_0 | 7   | 1      | 1           | 1      | 0 | 0 | 0 | 1 | Ref |
| MG945751 | Unassigned | Unassigned | Unassigned | 1340_0 | Clustered           | 7   | VC_1340_0 | 7   | 0.9206 | 0.99995294  | 0.9206 | 0 | 0 | 0 | 1 | Ref |
| MG945752 | Unassigned | Unassigned | Unassigned | 1237_0 | Clustered           | 3   | VC_1237_0 | 3   | 0.5448 | 0.99523779  | 0.5422 | 0 | 0 | 0 | 1 | Ref |
| MG945753 | Unassigned | Unassigned | Unassigned | 1170_0 | Clustered           | 19  | VC_1170_0 | 19  | 0.7497 | 1           | 0.7497 | 0 | 0 | 0 | 1 | Ref |
| MG945754 | Unassigned | Unassigned | Unassigned | 1191_0 | Clustered           | 9   | VC_1191_0 | 9   | 0.8537 | 1           | 0.8537 | 0 | 0 | 0 | 1 | Ref |
| MG945755 | Unassigned | Unassigned | Unassigned | 1353_0 | Clustered           | 4   | VC_1353_0 | 4   | 0.7838 | 0.99289298  | 0.7782 | 0 | 0 | 0 | 1 | Ref |
| MG945756 | Unassigned | Unassigned | Unassigned | 690_0  | Clustered           | 12  | VC_690_0  | 12  | 1      | 1           | 1      | 0 | 0 | 0 | 1 | Ref |
| MG945757 | Unassigned | Unassigned | Unassigned | 1286_0 | Clustered           | 16  | VC_1286_0 | 16  | 0.9448 | 1           | 0.9448 | 0 | 0 | 0 | 1 | Ref |
| MG945758 | Unassigned | Unassigned | Unassigned | 1145_0 | Clustered           | 164 | VC_1145_0 | 164 | 0.8868 | 1           | 0.8868 | 0 | 0 | 0 | 1 | Ref |
| MG945759 | Unassigned | Unassigned | Unassigned | 1184_0 | Clustered           | 10  | VC_1184_0 | 10  | 0.7506 | 1           | 0.7506 | 0 | 0 | 0 | 1 | Ref |
| MG945760 | Unassigned | Unassigned | Unassigned | 1184_0 | Clustered           | 10  | VC_1184_0 | 10  | 0.7506 | 1           | 0.7506 | 0 | 0 | 0 | 1 | Ref |
| MG945761 | Unassigned | Unassigned | Unassigned | 1145_0 | Clustered           | 164 | VC_1145_0 | 164 | 0.8868 | 1           | 0.8868 | 0 | 0 | 0 | 1 | Ref |
| MG945764 | Unassigned | Unassigned | Unassigned | 1189_0 | Clustered           | 16  | VC_1189_0 | 16  | 0.8814 | 1           | 0.8814 | 0 | 0 | 0 | 1 | Ref |
| MG945765 | Unassigned | Unassigned | Unassigned | 1145_0 | Clustered           | 164 | VC_1145_0 | 164 | 0.8868 | 1           | 0.8868 | 0 | 0 | 0 | 1 | Ref |
| MG945766 | Unassigned | Unassigned | Unassigned | 1391_0 | Clustered           | 2   | VC_1391_0 | 2   | 1      | 1           | 1      | 0 | 0 | 0 | 1 | Ref |
| MG945767 | Unassigned | Unassigned | Unassigned | 1152_0 | Clustered           | 26  | VC_1152_0 | 26  | 0.6685 | 1           | 0.6685 | 0 | 0 | 0 | 1 | Ref |
| MG945768 | Unassigned | Unassigned | Unassigned | 1145_0 | Clustered           | 164 | VC_1145_0 | 164 | 0.8868 | 1           | 0.8868 | 0 | 0 | 0 | 1 | Ref |
| MG945769 | Unassigned | Unassigned | Unassigned | 1392_0 | Clustered           | 2   | VC_1392_0 | 2   | 1      | 1           | 1      | 0 | 0 | 0 | 1 | Ref |
| MG945770 | Unassigned | Unassigned | Unassigned | 1145_0 | Clustered           | 164 | VC_1145_0 | 164 | 0.8868 | 1           | 0.8868 | 0 | 0 | 0 | 1 | Ref |
| MG945771 | Unassigned | Unassigned | Unassigned | 1155_0 | Clustered           | 14  | VC_1155_0 | 14  | 0.8287 | 1           | 0.8287 | 0 | 0 | 0 | 1 | Ref |
| MG945774 | Unassigned | Unassigned | Unassigned | 1308_0 | Clustered           | 15  | VC_1308_0 | 15  | 0.9074 | 1           | 0.9074 | 0 | 0 | 0 | 1 | Ref |
| MG945775 | Unassigned | Unassigned | Unassigned | 1148_0 | Clustered           | 4   | VC_1148_0 | 4   | 0.0503 | 0.99998999  | 0.0503 | 0 | 0 | 0 | 1 | Ref |
| MG945776 | Unassigned | Unassigned | Unassigned | 1325_0 | Clustered           | 7   | VC_1325_0 | 7   | 1      | 1           | 1      | 0 | 0 | 0 | 1 | Ref |
| MG945778 | Unassigned | Unassigned | Unassigned | 1349_0 | Clustered           | 3   | VC_1349_0 | 3   | 1      | 1           | 1      | 0 | 0 | 0 | 1 | Ref |
| MG945780 | Unassigned | Unassigned | Unassigned | 1169_0 | Clustered           | 8   | VC_1169_0 | 8   | 0.2897 | 1           | 0.2897 | 0 | 0 | 0 | 1 | Ref |
| MG945781 | Unassigned | Unassigned | Unassigned | 1170_0 | Clustered           | 19  | VC_1170_0 | 19  | 0.7497 | 1           | 0.7497 | 0 | 0 | 0 | 1 | Ref |
| MG945782 | Unassigned | Unassigned | Unassigned | 1348_0 | Clustered           | 7   | VC_1348_0 | 7   | 1      | 1           | 1      | 0 | 0 | 0 | 1 | Ref |
| MG945783 | Unassigned | Unassigned | Unassigned | 1320_0 | Clustered           | 10  | VC_1320_0 | 10  | 0.8478 | 1           | 0.8478 | 0 | 0 | 0 | 1 | Ref |
| MG945784 | Unassigned | Unassigned | Unassigned | 1267_0 | Clustered           | 26  | VC_1267_0 | 26  | 0.9597 | 0.999999998 | 0.9597 | 0 | 0 | 0 | 1 | Ref |
| MG945785 | Unassigned | Unassigned | Unassigned | 1192_0 | Clustered           | 4   | VC_1192_0 | 4   | 0.7187 | 0.99971165  | 0.7185 | 0 | 0 | 0 | 1 | Ref |
| MG945786 | Unassigned | Unassigned | Unassigned | 1145_0 | Clustered           | 164 | VC_1145_0 | 164 | 0.8868 | 1           | 0.8868 | 0 | 0 | 0 | 1 | Ref |
| MG945787 | Unassigned | Unassigned | Unassigned | 1145_0 | Clustered           | 164 | VC_1145_0 | 164 | 0.8868 | 1           | 0.8868 | 0 | 0 | 0 | 1 | Ref |
| MG945788 | Unassigned | Unassigned | Unassigned | 1393_0 | Clustered           | 2   | VC_1393_0 | 2   | 1      | 1           | 1      | 0 | 0 | 0 | 1 | Ref |
| MG945789 | Unassigned | Unassigned | Unassigned | 1337_0 | Clustered           | 3   | VC_1337_0 | 3   | 0.394  | 0.99705286  | 0.3928 | 0 | 0 | 0 | 1 | Ref |
| MG945790 | Unassigned | Unassigned | Unassigned | 1267_0 | Clustered           | 26  | VC_1267_0 | 26  | 0.9597 | 0.999999998 | 0.9597 | 0 | 0 | 0 | 1 | Ref |
| MG945791 | Unassigned | Unassigned | Unassigned | 1325_0 | Clustered           | 7   | VC_1325_0 | 7   | 1      | 1           | 1      | 0 | 0 | 0 | 1 | Ref |
| MG945792 | Unassigned | Unassigned | Unassigned | 1392_0 | Clustered           | 2   | VC_1392_0 | 2   | 1      | 1           | 1      | 0 | 0 | 0 | 1 | Ref |
| MG945793 | Unassigned | Unassigned | Unassigned | 1145_0 | Clustered           | 164 | VC_1145_0 | 164 | 0.8868 | 1           | 0.8868 | 0 | 0 | 0 | 1 | Ref |
| MG945794 | Unassigned | Unassigned | Unassigned | 1241_0 | Clustered           | 13  | VC_1241_0 | 13  | 0.8675 | 0.76044592  | 0.6597 | 0 | 0 | 0 | 1 | Ref |
| MG945795 | Unassigned | Unassigned | Unassigned | 1393_0 | Clustered           | 2   | VC_1393_0 | 2   | 1      | 1           | 1      | 0 | 0 | 0 | 1 | Ref |
| MG945796 | Unassigned | Unassigned | Unassigned | 1145_0 | Clustered           | 164 | VC_1145_0 | 164 | 0.8868 | 1           | 0.8868 | 0 | 0 | 0 | 1 | Ref |



|          |            |            |            |        |                     |               |     |        |            |        |   |   |   |            |
|----------|------------|------------|------------|--------|---------------------|---------------|-----|--------|------------|--------|---|---|---|------------|
| MG945797 | Unassigned | Unassigned | Unassigned | 1165_0 | Clustered           | 10 VC_1165_0  | 10  | 0.9263 | 1          | 0.9263 | 0 | 0 | 0 | 1 Ref      |
| MG945798 | Unassigned | Unassigned | Unassigned | 1394_0 | Clustered           | 4 VC_1394_0   | 4   | 0.7326 | 0.99899459 | 0.7318 | 0 | 0 | 0 | 1 Ref      |
| MG945799 | Unassigned | Unassigned | Unassigned | 1240_0 | Clustered           | 3 VC_1240_0   | 3   | 0.3359 | 0.99743975 | 0.3351 | 0 | 0 | 0 | 1 Ref      |
| MG945800 | Unassigned | Unassigned | Unassigned | 1240_0 | Clustered           | 3 VC_1240_0   | 3   | 0.3359 | 0.99743975 | 0.3351 | 0 | 0 | 0 | 1 Ref      |
| MG945801 | Unassigned | Unassigned | Unassigned | 1145_0 | Clustered           | 164 VC_1145_0 | 164 | 0.8868 | 1          | 0.8868 | 0 | 0 | 0 | 1 Ref      |
| MG945802 | Unassigned | Unassigned | Unassigned | 1145_0 | Clustered           | 164 VC_1145_0 | 164 | 0.8868 | 1          | 0.8868 | 0 | 0 | 0 | 1 Ref      |
| MG945803 | Unassigned | Unassigned | Unassigned | 1308_0 | Clustered           | 15 VC_1308_0  | 15  | 0.9074 | 1          | 0.9074 | 0 | 0 | 0 | 1 Ref      |
| MG945804 | Unassigned | Unassigned | Unassigned | 1315_0 | Clustered           | 3 VC_1315_0   | 3   | 0.2423 | 0.85925819 | 0.2082 | 0 | 0 | 0 | 1 Ref      |
| MG945805 | Unassigned | Unassigned | Unassigned | 1185_0 | Clustered           | 7 VC_1185_0   | 7   | 0.6862 | 1          | 0.6862 | 0 | 0 | 0 | 1 Ref      |
| MG945806 | Unassigned | Unassigned | Unassigned | 1346_0 | Clustered           | 25 VC_1346_0  | 25  | 1      | 1          | 1      | 0 | 0 | 0 | 1 Ref      |
| MG945807 | Unassigned | Unassigned | Unassigned | 1156_0 | Clustered           | 5 VC_1156_0   | 5   | 0.4454 | 0.99999977 | 0.4454 | 0 | 0 | 0 | 1 Ref      |
| MG945808 | Unassigned | Unassigned | Unassigned | 1396_0 | Clustered           | 2 VC_1396_0   | 2   | 1      | 1          | 1      | 0 | 0 | 0 | 1 Ref      |
| MG945809 | Unassigned | Unassigned | Unassigned | 1179_0 | Clustered           | 4 VC_1179_0   | 4   | 0.9241 | 0.99468305 | 0.9191 | 0 | 0 | 0 | 1 Ref      |
| MG945810 | Unassigned | Unassigned | Unassigned | 1192_0 | Clustered           | 4 VC_1192_0   | 4   | 0.7187 | 0.99971165 | 0.7185 | 0 | 0 | 0 | 1 Ref      |
| MG945811 | Unassigned | Unassigned | Unassigned | 1184_0 | Clustered           | 10 VC_1184_0  | 10  | 0.7506 | 1          | 0.7506 | 0 | 0 | 0 | 1 Ref      |
| MG945812 | Unassigned | Unassigned | Unassigned | 1340_0 | Clustered           | 7 VC_1340_0   | 7   | 0.9206 | 0.99995294 | 0.9206 | 0 | 0 | 0 | 1 Ref      |
| MG945813 | Unassigned | Unassigned | Unassigned | 1267_0 | Clustered           | 26 VC_1267_0  | 26  | 0.9597 | 0.99999998 | 0.9597 | 0 | 0 | 0 | 1 Ref      |
| MG945814 | Unassigned | Unassigned | Unassigned | 1346_0 | Clustered           | 25 VC_1346_0  | 25  | 1      | 1          | 1      | 0 | 0 | 0 | 1 Ref      |
| MG945815 | Unassigned | Unassigned | Unassigned | 1314_0 | Clustered           | 6 VC_1314_0   | 6   | 0.6504 | 0.99999969 | 0.6504 | 0 | 0 | 0 | 1 Ref      |
| MG945816 | Unassigned | Unassigned | Unassigned | 1191_0 | Clustered           | 9 VC_1191_0   | 9   | 0.8537 | 1          | 0.8537 | 0 | 0 | 0 | 1 Ref      |
| MG945817 | Unassigned | Unassigned | Unassigned | 1189_0 | Clustered           | 16 VC_1189_0  | 16  | 0.8814 | 1          | 0.8814 | 0 | 0 | 0 | 1 Ref      |
| MG945818 | Unassigned | Unassigned | Unassigned | 1351_0 | Clustered           | 2 VC_1351_0   | 2   | 1      | 1          | 1      | 0 | 0 | 0 | 1 Ref      |
| MG945819 | Unassigned | Unassigned | Unassigned | 1155_0 | Clustered           | 14 VC_1155_0  | 14  | 0.8287 | 1          | 0.8287 | 0 | 0 | 0 | 1 Ref      |
| MG945820 | Unassigned | Unassigned | Unassigned | 1145_0 | Clustered           | 164 VC_1145_0 | 164 | 0.8868 | 1          | 0.8868 | 0 | 0 | 0 | 1 Ref      |
| MG945821 | Unassigned | Unassigned | Unassigned | 1397_0 | Clustered/Singleton | 1 VC_1397_0   | 1   | 0      | 1          | 0      | 0 | 0 | 0 | 1 Ref      |
| MG945822 | Unassigned | Unassigned | Unassigned | 1331_0 | Clustered           | 6 VC_1331_0   | 6   | 0.7375 | 0.9999804  | 0.7375 | 0 | 0 | 0 | 1 Ref      |
| MG945823 | Unassigned | Unassigned | Unassigned | 1391_0 | Clustered           | 2 VC_1391_0   | 2   | 1      | 1          | 1      | 0 | 0 | 0 | 1 Ref      |
| MG945824 | Unassigned | Unassigned | Unassigned | 1367_0 | Clustered           | 5 VC_1367_0   | 5   | 0.7699 | 0.66985041 | 0.5157 | 0 | 0 | 0 | 1 Ref      |
| MG945825 | Unassigned | Unassigned | Unassigned | 1340_0 | Clustered           | 7 VC_1340_0   | 7   | 0.9206 | 0.99995294 | 0.9206 | 0 | 0 | 0 | 1 Ref      |
| MG945826 | Unassigned | Unassigned | Unassigned | 1161_0 | Clustered           | 16 VC_1161_0  | 16  | 0.4834 | 0.99999958 | 0.4834 | 0 | 0 | 0 | 1 Ref      |
| MG945827 | Unassigned | Unassigned | Unassigned | 1187_0 | Clustered           | 3 VC_1187_0   | 3   | 0.5022 | 0.99747895 | 0.501  | 0 | 0 | 0 | 1 Ref      |
| MG945828 | Unassigned | Unassigned | Unassigned | 1361_0 | Clustered           | 2 VC_1361_0   | 2   | 0.6617 | 0.72985431 | 0.4829 | 0 | 0 | 0 | 1 Ref      |
| MG945829 | Unassigned | Unassigned | Unassigned | 1308_0 | Clustered           | 15 VC_1308_0  | 15  | 0.9074 | 1          | 0.9074 | 0 | 0 | 0 | 1 Ref      |
| MG945831 | Unassigned | Unassigned | Unassigned | 1398_0 | Clustered           | 7 VC_1398_0   | 7   | 0.8336 | 0.99999844 | 0.8336 | 0 | 0 | 0 | 1 Ref      |
| MG945832 | Unassigned | Unassigned | Unassigned | 1400_0 | Clustered           | 2 VC_1400_0   | 2   | 1      | 1          | 1      | 0 | 0 | 0 | 1 Ref      |
| MG945835 | Unassigned | Unassigned | Unassigned | 1101_0 | Clustered           | 3 VC_1101_0   | 3   | 0.3918 | 0.9839946  | 0.3856 | 0 | 0 | 0 | 1 Ref      |
| MG945836 | Unassigned | Unassigned | Unassigned | 1119_0 | Clustered           | 48 VC_1119_0  | 48  | 0.852  | 1          | 0.852  | 0 | 0 | 0 | 1 Ref      |
| MG945837 | Unassigned | Unassigned | Unassigned | 411_0  | Clustered           | 48 VC_411_0   | 48  | 0.4808 | 1          | 0.4808 | 0 | 0 | 0 | 1 Ref      |
| MG945838 | Unassigned | Unassigned | Unassigned | 1028_0 | Clustered           | 69 VC_1028_0  | 69  | 0.8547 | 1          | 0.8547 | 0 | 0 | 0 | 1 Ref      |
| MG945839 | Unassigned | Unassigned | Unassigned | 1401_0 | Clustered           | 4 VC_1401_0   | 4   | 1      | 1          | 1      | 0 | 0 | 0 | 1 Ref      |
| MG945840 | Unassigned | Unassigned | Unassigned | 1119_0 | Clustered           | 48 VC_1119_0  | 48  | 0.852  | 1          | 0.852  | 0 | 0 | 0 | 1 Ref      |
| MG945842 | Unassigned | Unassigned | Unassigned | 1402_0 | Clustered           | 7 VC_1402_0   | 7   | 0.9174 | 0.99772305 | 0.9153 | 0 | 0 | 0 | 1 Ref      |
| MG945843 | Unassigned | Unassigned | Unassigned | 1028_0 | Clustered           | 69 VC_1028_0  | 69  | 0.8547 | 1          | 0.8547 | 0 | 1 | 0 | 1 Ref      |
| MG945845 | Unassigned | Unassigned | Unassigned | 1267_0 | Clustered           | 26 VC_1267_0  | 26  | 0.9597 | 0.99999998 | 0.9597 | 0 | 0 | 0 | 1 Ref      |
| MG945846 | Unassigned | Unassigned | Unassigned | 1119_0 | Clustered           | 48 VC_1119_0  | 48  | 0.852  | 1          | 0.852  | 0 | 0 | 0 | 1 Ref      |
| MG945848 | Unassigned | Unassigned | Unassigned | 1324_0 | Clustered           | 5 VC_1324_0   | 5   | 1      | 1          | 1      | 0 | 0 | 0 | 1 Ref      |
| MG945849 | Unassigned | Unassigned | Unassigned | 1396_0 | Clustered           | 2 VC_1396_0   | 2   | 1      | 1          | 1      | 0 | 0 | 0 | 1 Ref      |
| MG945850 | Unassigned | Unassigned | Unassigned | 1403_0 | Clustered           | 5 VC_1403_0   | 5   | 1      | 1          | 1      | 0 | 0 | 0 | 1 Ref      |
| MG945852 | Unassigned | Unassigned | Unassigned | 1324_0 | Clustered           | 5 VC_1324_0   | 5   | 1      | 1          | 1      | 0 | 0 | 0 | 1 Ref      |
| MG945853 | Unassigned | Unassigned | Unassigned | 1145_0 | Clustered           | 164 VC_1145_0 | 164 | 0.8868 | 1          | 0.8868 | 0 | 0 | 0 | 1 Ref      |
| MG945855 | Unassigned | Unassigned | Unassigned | 1145_0 | Clustered           | 164 VC_1145_0 | 164 | 0.8868 | 1          | 0.8868 | 0 | 0 | 0 | 1 Ref      |
| MG945857 | Unassigned | Unassigned | Unassigned | 1405_0 | Clustered           | 3 VC_1405_0   | 3   | 1      | 1          | 1      | 0 | 0 | 0 | 1 Ref      |
| MG945858 | Unassigned | Unassigned | Unassigned | 1152_0 | Clustered           | 26 VC_1152_0  | 26  | 0.6685 | 1          | 0.6685 | 0 | 0 | 0 | 1 Ref      |
| MG945859 | Unassigned | Unassigned | Unassigned | 1405_0 | Clustered           | 3 VC_1405_0   | 3   | 1      | 1          | 1      | 0 | 0 | 0 | 1 Ref      |
| MG945862 | Unassigned | Unassigned | Unassigned | 1145_0 | Clustered           | 164 VC_1145_0 | 164 | 0.8868 | 1          | 0.8868 | 0 | 0 | 0 | 1 Ref      |
| MG945864 | Unassigned | Unassigned | Unassigned | 1145_0 | Clustered           | 164 VC_1145_0 | 164 | 0.8868 | 1          | 0.8868 | 0 | 0 | 0 | 1 Ref      |
| MG945866 | Unassigned | Unassigned | Unassigned | 1405_0 | Clustered           | 3 VC_1405_0   | 3   | 1      | 1          | 1      | 0 | 0 | 0 | 1 Ref      |
| MG945867 | Unassigned | Unassigned | Unassigned | 1167_0 | Clustered           | 11 VC_1167_0  | 11  | 0.5637 | 1          | 0.5637 | 0 | 0 | 0 | 1 Ref      |
| MG945869 | Unassigned | Unassigned | Unassigned | 1145_0 | Clustered           | 164 VC_1145_0 | 164 | 0.8868 | 1          | 0.8868 | 0 | 0 | 0 | 1 Ref      |
| MG945870 | Unassigned | Unassigned | Unassigned | 1165_0 | Clustered           | 10 VC_1165_0  | 10  | 0.9263 | 1          | 0.9263 | 0 | 0 | 0 | 1 Ref      |
| MG945909 | Unassigned | Unassigned | Unassigned | 1315_0 | Clustered           | 3 VC_1315_0   | 3   | 0.2423 | 0.85925819 | 0.2082 | 0 | 0 | 0 | 1 Ref      |
| MG957431 | Unassigned | Unassigned | Unassigned | 83_0   | Clustered           | 24 VC_83_0    | 24  | 0.7345 | 1          | 0.7345 | 0 | 0 | 0 | 1 Ref      |
| MG962360 | Unassigned | Unassigned | Unassigned | 1296_0 | Clustered           | 82 VC_1296_0  | 82  | 0.7938 | 1          | 0.7938 | 0 | 0 | 0 | 1 Ref      |
| MG962361 | Unassigned | Unassigned | Unassigned | 538_64 | Clustered/Singleton | 1 VC_538_64   | 1   | 0      | 1          | 0      | 0 | 0 | 0 | 1 Ref      |
| MG962362 | Unassigned | Unassigned | Unassigned | 384_3  | Clustered           | 22 VC_384_3   | 22  | 0.0786 | 1          | 0.0786 | 0 | 0 | 0 | 0.9048 Ref |
| MG962363 | Unassigned | Unassigned | Unassigned | 384_13 | Clustered           | 33 VC_384_13  | 33  | 0.1785 | 1          | 0.1785 | 0 | 0 | 0 | 0.8769 Ref |
| MG962364 | Unassigned | Unassigned | Unassigned | 243_0  | Clustered           | 72 VC_243_0   | 72  | 0.8089 | 1          | 0.8089 | 0 | 0 | 0 | 1 Ref      |
| MG962365 | Unassigned | Unassigned | Unassigned | 384_16 | Clustered           | 42 VC_384_16  | 42  | 0.134  | 1          | 0.134  | 0 | 0 | 0 | 0.7282 Ref |
| MG962367 | Unassigned | Unassigned | Unassigned | 1296_0 | Clustered           | 82 VC_1296_0  | 82  | 0.7938 | 1          | 0.7938 | 0 | 0 | 0 | 1 Ref      |
| MG962368 | Unassigned | Unassigned | Unassigned | 898_1  | Clustered           | 27 VC_898_1   | 27  | 0.8894 | 1          | 0.8894 | 0 | 0 | 0 | 1 Ref      |
| MG962369 | Unassigned | Unassigned | Unassigned | 898_1  | Clustered           | 27 VC_898_1   | 27  | 0.8894 | 1          | 0.8894 | 0 | 0 | 0 | 1 Ref      |
| MG962370 | Unassigned | Unassigned | Unassigned | 335_41 | Clustered           | 2 VC_335_41   | 2   | 0.0045 | 0.9575092  | 0.0043 | 0 | 0 | 0 | 1 Ref      |
| MG962371 | Unassigned | Unassigned | Unassigned | 243_0  | Clustered           | 72 VC_243_0   | 72  | 0.8089 | 1          | 0.8089 | 0 | 0 | 0 | 1 Ref      |
| MG962372 | Unassigned | Unassigned | Unassigned | 335_5  | Clustered           | 11 VC_335_5   | 11  | 0.0469 | 1          | 0.0469 | 0 | 0 | 0 | 0.7636 Ref |
| MG962373 | Unassigned | Unassigned | Unassigned | 535_1  | Clustered           | 108 VC_535_1  | 108 | 0.8479 | 1          | 0.8479 | 0 | 0 | 0 | 0.9955 Ref |
| MG962374 | Unassigned | Unassigned | Unassigned | 245_0  | Clustered           | 17 VC_245_0   | 17  | 0.6081 | 1          | 0.6081 | 0 | 0 | 0 | 1 Ref      |
| MG962375 | Unassigned | Unassigned | Unassigned | 384_2  | Clustered           | 8 VC_384_2    | 8   | 0.0232 | 1          | 0.0232 | 0 | 0 | 0 | 0.8571 Ref |
| MG962376 | Unassigned | Unassigned | Unassigned | 587_0  | Clustered           | 8 VC_587_0    | 8   | 0.4907 | 1          | 0.4907 | 0 | 0 | 0 | 1 Ref      |
| MG963916 | Unassigned | Unassigned | Unassigned | 794_16 | Clustered           | 10 VC_794_16  | 10  | 0.0563 | 0.9411319  | 0.053  | 0 | 0 | 0 | 0.8667 Ref |
| MG966531 | Unassigned | Unassigned | Unassigned | 405_0  | Clustered           | 126 VC_405_0  | 126 | 0.9614 | 1          | 0.9614 | 0 | 0 | 0 | 1 Ref      |
| MG966533 | Unassigned | Unassigned | Unassigned | 284_0  | Clustered           | 3 VC_284_0    | 3   | 1      | 1          | 1      | 0 | 0 | 0 | 1 Ref      |



|          |            |            |            |        |                     |              |     |        |            |        |   |   |   |            |
|----------|------------|------------|------------|--------|---------------------|--------------|-----|--------|------------|--------|---|---|---|------------|
| MC967616 | Unassigned | Unassigned | Unassigned | 1042_0 | Clustered           | 8 VC_1042_0  | 8   | 0.7385 | 1          | 0.7385 | 0 | 0 | 0 | 1 Ref      |
| MC967617 | Unassigned | Unassigned | Unassigned | 1042_0 | Clustered           | 8 VC_1042_0  | 8   | 0.7385 | 1          | 0.7385 | 0 | 0 | 0 | 1 Ref      |
| MC967618 | Unassigned | Unassigned | Unassigned | 1042_0 | Clustered           | 8 VC_1042_0  | 8   | 0.7385 | 1          | 0.7385 | 0 | 0 | 0 | 1 Ref      |
| MC969404 | Unassigned | Unassigned | Unassigned | 340_14 | Clustered/Singleton | 1 VC_340_14  | 1   | 0      | 1          | 0      | 0 | 0 | 0 | 1 Ref      |
| MC969405 | Unassigned | Unassigned | Unassigned | 340_1  | Clustered           | 17 VC_340_1  | 17  | 0.0863 | 1          | 0.0863 | 0 | 0 | 0 | 0.8235 Ref |
| MC969406 | Unassigned | Unassigned | Unassigned | 340_1  | Clustered           | 17 VC_340_1  | 17  | 0.0863 | 1          | 0.0863 | 0 | 0 | 0 | 0.8235 Ref |
| MC969408 | Unassigned | Unassigned | Unassigned | 654_0  | Clustered           | 115 VC_654_0 | 115 | 0.7303 | 1          | 0.7303 | 0 | 0 | 0 | 0.8764 Ref |
| MC969409 | Unassigned | Unassigned | Unassigned | 654_0  | Clustered           | 115 VC_654_0 | 115 | 0.7303 | 1          | 0.7303 | 0 | 0 | 0 | 0.8764 Ref |
| MC969410 | Unassigned | Unassigned | Unassigned | 654_0  | Clustered           | 115 VC_654_0 | 115 | 0.7303 | 1          | 0.7303 | 0 | 0 | 0 | 0.8764 Ref |
| MC969411 | Unassigned | Unassigned | Unassigned | 601_6  | Clustered/Singleton | 1 VC_601_6   | 1   | 0      | 1          | 0      | 0 | 0 | 0 | 1 Ref      |
| MC969412 | Unassigned | Unassigned | Unassigned | 198_40 | Clustered           | 2 VC_198_40  | 2   | 0.0082 | 0.95556395 | 0.0078 | 0 | 0 | 0 | 1 Ref      |
| MC969415 | Unassigned | Unassigned | Unassigned | 30_1   | Clustered           | 53 VC_30_1   | 53  | 0.7151 | 1          | 0.7151 | 0 | 0 | 0 | 0.9325 Ref |
| MC972768 | Unassigned | Unassigned | Unassigned | 113_0  | Clustered           | 91 VC_113_0  | 91  | 0.9584 | 1          | 0.9584 | 0 | 0 | 0 | 1 Ref      |
| MC973030 | Unassigned | Unassigned | Unassigned | 134_0  | Clustered           | 2 VC_134_0   | 2   | 0.0123 | 0.95745739 | 0.0118 | 0 | 0 | 0 | 1 Ref      |
| MC976803 | Unassigned | Unassigned | Unassigned | 837_1  | Clustered           | 24 VC_837_1  | 24  | 0.5328 | 1          | 0.5328 | 0 | 0 | 0 | 1 Ref      |
| MC983742 | Unassigned | Unassigned | Unassigned | 102_0  | Clustered           | 15 VC_102_0  | 15  | 0.653  | 1          | 0.653  | 0 | 0 | 0 | 1 Ref      |
| MC983743 | Unassigned | Unassigned | Unassigned | 801_3  | Clustered           | 7 VC_801_3   | 7   | 0.0764 | 1          | 0.0764 | 0 | 0 | 0 | 0.7143 Ref |
| MC983840 | Unassigned | Unassigned | Unassigned | 837_1  | Clustered           | 24 VC_837_1  | 24  | 0.5328 | 1          | 0.5328 | 0 | 0 | 0 | 1 Ref      |
| MH000602 | Unassigned | Unassigned | Unassigned | 258_0  | Clustered           | 121 VC_258_0 | 121 | 0.7359 | 1          | 0.7359 | 0 | 0 | 0 | 0.9999 Ref |
| MH000603 | Unassigned | Unassigned | Unassigned | 258_0  | Clustered           | 121 VC_258_0 | 121 | 0.7359 | 1          | 0.7359 | 0 | 0 | 0 | 0.9999 Ref |
| MH000604 | Unassigned | Unassigned | Unassigned | 258_0  | Clustered           | 121 VC_258_0 | 121 | 0.7359 | 1          | 0.7359 | 0 | 0 | 0 | 0.9999 Ref |
| MH000606 | Unassigned | Unassigned | Unassigned | 335_27 | Clustered           | 6 VC_335_27  | 6   | 0.0266 | 1          | 0.0266 | 0 | 0 | 0 | 0.8 Ref    |
| MH000607 | Unassigned | Unassigned | Unassigned | 571_7  | Clustered           | 28 VC_571_7  | 28  | 0.1651 | 1          | 0.1651 | 0 | 0 | 0 | 0.8519 Ref |
| MH001446 | Unassigned | Unassigned | Unassigned | 525_0  | Clustered           | 8 VC_525_0   | 8   | 0.443  | 1          | 0.443  | 0 | 0 | 0 | 1 Ref      |
| MH001447 | Unassigned | Unassigned | Unassigned | 588_0  | Clustered           | 8 VC_588_0   | 8   | 0.5695 | 1          | 0.5695 | 0 | 0 | 0 | 1 Ref      |
| MH001448 | Unassigned | Unassigned | Unassigned | 538_59 | Clustered           | 5 VC_538_59  | 5   | 0.0456 | 0.99999997 | 0.0456 | 0 | 0 | 0 | 1 Ref      |
| MH001450 | Unassigned | Unassigned | Unassigned | 525_0  | Clustered           | 8 VC_525_0   | 8   | 0.443  | 1          | 0.443  | 0 | 0 | 0 | 1 Ref      |
| MH001451 | Unassigned | Unassigned | Unassigned | 1087_0 | Clustered           | 7 VC_1087_0  | 7   | 0.94   | 1          | 0.94   | 0 | 0 | 0 | 1 Ref      |
| MH001452 | Unassigned | Unassigned | Unassigned | 526_0  | Clustered           | 32 VC_526_0  | 32  | 0.9037 | 1          | 0.9037 | 0 | 0 | 0 | 1 Ref      |
| MH001453 | Unassigned | Unassigned | Unassigned | 243_0  | Clustered           | 72 VC_243_0  | 72  | 0.8089 | 1          | 0.8089 | 0 | 0 | 0 | 1 Ref      |
| MH001454 | Unassigned | Unassigned | Unassigned | 231_0  | Clustered           | 19 VC_231_0  | 19  | 0.9378 | 1          | 0.9378 | 0 | 0 | 0 | 1 Ref      |
| MH001455 | Unassigned | Unassigned | Unassigned | 783_0  | Clustered           | 67 VC_783_0  | 67  | 0.8945 | 1          | 0.8945 | 0 | 0 | 0 | 1 Ref      |
| MH001456 | Unassigned | Unassigned | Unassigned | 783_0  | Clustered           | 67 VC_783_0  | 67  | 0.8945 | 1          | 0.8945 | 0 | 0 | 0 | 1 Ref      |
| MH001457 | Unassigned | Unassigned | Unassigned | 388_0  | Clustered           | 3 VC_388_0   | 3   | 0.2477 | 0.99807286 | 0.2473 | 0 | 0 | 0 | 1 Ref      |
| MH001458 | Unassigned | Unassigned | Unassigned | 335_11 | Clustered/Singleton | 1 VC_335_11  | 1   | 0      | 1          | 0      | 0 | 0 | 0 | 1 Ref      |
| MH001459 | Unassigned | Unassigned | Unassigned | 533_0  | Clustered           | 16 VC_533_0  | 16  | 0.3765 | 1          | 0.3765 | 0 | 0 | 0 | 1 Ref      |
| MH001460 | Unassigned | Unassigned | Unassigned | 1015_1 | Clustered           | 26 VC_1015_1 | 26  | 0.6989 | 1          | 0.6989 | 0 | 0 | 0 | 1 Ref      |
| MH015249 | Unassigned | Unassigned | Unassigned | 612_0  | Clustered           | 5 VC_612_0   | 5   | 0.4531 | 0.99999995 | 0.4531 | 0 | 0 | 0 | 1 Ref      |
| MH015250 | Unassigned | Unassigned | Unassigned | 857_0  | Clustered           | 16 VC_857_0  | 16  | 0.9317 | 1          | 0.9317 | 0 | 0 | 0 | 1 Ref      |
| MH015251 | Unassigned | Unassigned | Unassigned | 1268_0 | Clustered           | 2 VC_1268_0  | 2   | 1      | 1          | 1      | 0 | 0 | 0 | 1 Ref      |
| MH015252 | Unassigned | Unassigned | Unassigned | 612_0  | Clustered           | 5 VC_612_0   | 5   | 0.4531 | 0.99999995 | 0.4531 | 0 | 0 | 0 | 1 Ref      |
| MH015253 | Unassigned | Unassigned | Unassigned | 857_0  | Clustered           | 16 VC_857_0  | 16  | 0.9317 | 1          | 0.9317 | 0 | 0 | 0 | 1 Ref      |
| MH015254 | Unassigned | Unassigned | Unassigned | 612_0  | Clustered           | 5 VC_612_0   | 5   | 0.4531 | 0.99999995 | 0.4531 | 0 | 0 | 0 | 1 Ref      |
| MH015255 | Unassigned | Unassigned | Unassigned | 1012_0 | Clustered           | 2 VC_1012_0  | 2   | 0.0796 | 0.93920319 | 0.0747 | 0 | 0 | 0 | 1 Ref      |
| MH015256 | Unassigned | Unassigned | Unassigned | 857_0  | Clustered           | 16 VC_857_0  | 16  | 0.9317 | 1          | 0.9317 | 0 | 0 | 0 | 1 Ref      |
| MH015257 | Unassigned | Unassigned | Unassigned | 857_0  | Clustered           | 16 VC_857_0  | 16  | 0.9317 | 1          | 0.9317 | 0 | 0 | 0 | 1 Ref      |
| MH015258 | Unassigned | Unassigned | Unassigned | 612_0  | Clustered           | 5 VC_612_0   | 5   | 0.4531 | 0.99999995 | 0.4531 | 0 | 0 | 0 | 1 Ref      |
| MH015259 | Unassigned | Unassigned | Unassigned | 857_0  | Clustered           | 16 VC_857_0  | 16  | 0.9317 | 1          | 0.9317 | 0 | 0 | 0 | 1 Ref      |
| MH019215 | Unassigned | Unassigned | Unassigned | 885_0  | Clustered           | 9 VC_885_0   | 9   | 0.9403 | 1          | 0.9403 | 0 | 0 | 0 | 1 Ref      |
| MH019216 | Unassigned | Unassigned | Unassigned | 885_0  | Clustered           | 9 VC_885_0   | 9   | 0.9403 | 1          | 0.9403 | 0 | 0 | 0 | 1 Ref      |
| MH020235 | Unassigned | Unassigned | Unassigned | 538_31 | Clustered           | 11 VC_538_31 | 11  | 0.0894 | 1          | 0.0894 | 0 | 0 | 0 | 0.6 Ref    |
| MH020236 | Unassigned | Unassigned | Unassigned | 335_56 | Clustered           | 7 VC_335_56  | 7   | 0.0242 | 1          | 0.0242 | 0 | 0 | 0 | 0.9048 Ref |
| MH020237 | Unassigned | Unassigned | Unassigned | 222_2  | Clustered           | 5 VC_222_2   | 5   | 0.0569 | 0.99999997 | 0.0569 | 0 | 0 | 0 | 1 Ref      |
| MH020238 | Unassigned | Unassigned | Unassigned | 532_0  | Clustered           | 75 VC_532_0  | 75  | 0.9393 | 1          | 0.9393 | 0 | 0 | 0 | 1 Ref      |
| MH020239 | Unassigned | Unassigned | Unassigned | 974_0  | Clustered           | 34 VC_974_0  | 34  | 0.7953 | 1          | 0.7953 | 0 | 0 | 0 | 1 Ref      |
| MH020240 | Unassigned | Unassigned | Unassigned | 230_0  | Clustered           | 38 VC_230_0  | 38  | 0.9076 | 1          | 0.9076 | 0 | 0 | 0 | 1 Ref      |
| MH020241 | Unassigned | Unassigned | Unassigned | 1217_0 | Clustered           | 41 VC_1217_0 | 41  | 0.9546 | 1          | 0.9546 | 0 | 0 | 0 | 0.9976 Ref |
| MH020244 | Unassigned | Unassigned | Unassigned | 335_23 | Clustered           | 17 VC_335_23 | 17  | 0.0714 | 1          | 0.0714 | 0 | 0 | 0 | 0.6397 Ref |
| MH020246 | Unassigned | Unassigned | Unassigned | 577_0  | Clustered           | 21 VC_577_0  | 21  | 0.9908 | 1          | 0.9908 | 0 | 0 | 0 | 1 Ref      |
| MH020247 | Unassigned | Unassigned | Unassigned | 571_8  | Clustered           | 19 VC_571_8  | 19  | 0.1031 | 1          | 0.1031 | 0 | 0 | 0 | 0.8713 Ref |
| MH020248 | Unassigned | Unassigned | Unassigned | 531_0  | Clustered           | 32 VC_531_0  | 32  | 0.6859 | 1          | 0.6859 | 0 | 0 | 0 | 1 Ref      |
| MH020249 | Unassigned | Unassigned | Unassigned | 535_1  | Clustered           | 108 VC_535_1 | 108 | 0.8479 | 1          | 0.8479 | 0 | 0 | 0 | 0.9955 Ref |
| MH023293 | Unassigned | Unassigned | Unassigned | 475_0  | Clustered           | 96 VC_475_0  | 96  | 0.9303 | 1          | 0.9303 | 0 | 0 | 0 | 0.9575 Ref |
| MH025888 | Unassigned | Unassigned | Unassigned | 585_0  | Clustered           | 20 VC_585_0  | 20  | 0.8376 | 1          | 0.8376 | 0 | 0 | 0 | 1 Ref      |
| MH025889 | Unassigned | Unassigned | Unassigned | 893_1  | Clustered           | 20 VC_893_1  | 20  | 0.4792 | 1          | 0.4792 | 0 | 0 | 0 | 1 Ref      |
| MH025890 | Unassigned | Unassigned | Unassigned | 590_0  | Clustered           | 9 VC_590_0   | 9   | 0.4952 | 1          | 0.4952 | 0 | 0 | 0 | 1 Ref      |
| MH031343 | Unassigned | Unassigned | Unassigned | 399_0  | Clustered           | 49 VC_399_0  | 49  | 0.7927 | 1          | 0.7927 | 0 | 0 | 0 | 1 Ref      |
| MH042230 | Unassigned | Unassigned | Unassigned | 714_0  | Clustered           | 71 VC_714_0  | 71  | 0.935  | 1          | 0.935  | 0 | 0 | 0 | 1 Ref      |
| MH045554 | Unassigned | Unassigned | Unassigned | 1296_0 | Clustered           | 82 VC_1296_0 | 82  | 0.7938 | 1          | 0.7938 | 0 | 0 | 0 | 1 Ref      |
| MH045557 | Unassigned | Unassigned | Unassigned | 1407_0 | Clustered           | 78 VC_1407_0 | 78  | 0.9731 | 1          | 0.9731 | 0 | 0 | 0 | 1 Ref      |
| MH045558 | Unassigned | Unassigned | Unassigned | 1296_0 | Clustered           | 82 VC_1296_0 | 82  | 0.7938 | 1          | 0.7938 | 0 | 0 | 0 | 1 Ref      |
| MH045560 | Unassigned | Unassigned | Unassigned | 1296_0 | Clustered           | 82 VC_1296_0 | 82  | 0.7938 | 1          | 0.7938 | 0 | 0 | 0 | 1 Ref      |
| MH045561 | Unassigned | Unassigned | Unassigned | 1407_0 | Clustered           | 78 VC_1407_0 | 78  | 0.9731 | 1          | 0.9731 | 0 | 0 | 0 | 1 Ref      |
| MH045562 | Unassigned | Unassigned | Unassigned | 1296_0 | Clustered           | 82 VC_1296_0 | 82  | 0.7938 | 1          | 0.7938 | 0 | 0 | 0 | 1 Ref      |
| MH045563 | Unassigned | Unassigned | Unassigned | 1296_0 | Clustered           | 82 VC_1296_0 | 82  | 0.7938 | 1          | 0.7938 | 0 | 0 | 0 | 1 Ref      |
| MH045564 | Unassigned | Unassigned | Unassigned | 1296_0 | Clustered           | 82 VC_1296_0 | 82  | 0.7938 | 1          | 0.7938 | 0 | 0 | 0 | 1 Ref      |
| MH045565 | Unassigned | Unassigned | Unassigned | 1296_0 | Clustered           | 82 VC_1296_0 | 82  | 0.7938 | 1          | 0.7938 | 0 | 0 | 0 | 1 Ref      |
| MH045566 | Unassigned | Unassigned | Unassigned | 1287_0 | Clustered           | 44 VC_1287_0 | 44  | 1      | 1          | 1      | 0 | 0 | 0 | 1 Ref      |
| MH045567 | Unassigned | Unassigned | Unassigned | 1287_0 | Clustered           | 44 VC_1287_0 | 44  | 1      | 1          | 1      | 0 | 0 | 0 | 1 Ref      |
| MH045568 | Unassigned | Unassigned | Unassigned | 1287_0 | Clustered           | 44 VC_1287_0 | 44  | 1      | 1          | 1      | 0 | 0 | 0 | 1 Ref      |
| MH045569 | Unassigned | Unassigned | Unassigned | 783_0  | Clustered           | 67 VC_783_0  | 67  | 0.8945 | 1          | 0.8945 | 0 | 0 | 0 | 1 Ref      |



|          |            |            |            |         |                     |              |     |        |            |        |   |   |   |            |
|----------|------------|------------|------------|---------|---------------------|--------------|-----|--------|------------|--------|---|---|---|------------|
| MH047632 | Unassigned | Unassigned | Unassigned | 531_0   | Clustered           | 32 VC_531_0  | 32  | 0.6859 | 1          | 0.6859 | 0 | 0 | 0 | 1 Ref      |
| MH047633 | Unassigned | Unassigned | Unassigned | 531_0   | Clustered           | 32 VC_531_0  | 32  | 0.6859 | 1          | 0.6859 | 0 | 0 | 0 | 1 Ref      |
| MH051246 | Unassigned | Unassigned | Unassigned | 243_0   | Clustered           | 72 VC_243_0  | 72  | 0.8089 | 1          | 0.8089 | 0 | 0 | 0 | 1 Ref      |
| MH051247 | Unassigned | Unassigned | Unassigned | 535_1   | Clustered           | 108 VC_535_1 | 108 | 0.8479 | 1          | 0.8479 | 0 | 0 | 0 | 0.9955 Ref |
| MH051249 | Unassigned | Unassigned | Unassigned | 526_0   | Clustered           | 32 VC_526_0  | 32  | 0.9037 | 1          | 0.9037 | 0 | 0 | 0 | 1 Ref      |
| MH051250 | Unassigned | Unassigned | Unassigned | 974_0   | Clustered           | 34 VC_974_0  | 34  | 0.7953 | 1          | 0.7953 | 0 | 0 | 0 | 1 Ref      |
| MH051251 | Unassigned | Unassigned | Unassigned | 384_13  | Clustered           | 33 VC_384_13 | 33  | 0.1785 | 1          | 0.1785 | 0 | 0 | 0 | 0.8769 Ref |
| MH051252 | Unassigned | Unassigned | Unassigned | 223_6   | Clustered           | 42 VC_223_6  | 42  | 0.4717 | 1          | 0.4717 | 0 | 0 | 0 | 0.8351 Ref |
| MH051253 | Unassigned | Unassigned | Unassigned | 230_0   | Clustered           | 38 VC_230_0  | 38  | 0.9076 | 1          | 0.9076 | 0 | 0 | 0 | 1 Ref      |
| MH051254 | Unassigned | Unassigned | Unassigned | 974_0   | Clustered           | 34 VC_974_0  | 34  | 0.7953 | 1          | 0.7953 | 0 | 0 | 0 | 1 Ref      |
| MH051255 | Unassigned | Unassigned | Unassigned | 245_0   | Clustered           | 17 VC_245_0  | 17  | 0.6081 | 1          | 0.6081 | 0 | 0 | 0 | 1 Ref      |
| MH051256 | Unassigned | Unassigned | Unassigned | 974_0   | Clustered           | 34 VC_974_0  | 34  | 0.7953 | 1          | 0.7953 | 0 | 0 | 0 | 1 Ref      |
| MH051257 | Unassigned | Unassigned | Unassigned | 538_51  | Clustered/Singleton | 1 VC_538_51  | 1   | 0      | 1          | 0      | 0 | 0 | 0 | 1 Ref      |
| MH051258 | Unassigned | Unassigned | Unassigned | 241_0   | Clustered           | 21 VC_241_0  | 21  | 0.8342 | 1          | 0.8342 | 0 | 0 | 0 | 1 Ref      |
| MH051259 | Unassigned | Unassigned | Unassigned | 531_0   | Clustered           | 32 VC_531_0  | 32  | 0.6859 | 1          | 0.6859 | 0 | 0 | 0 | 1 Ref      |
| MH051260 | Unassigned | Unassigned | Unassigned | 579_61  | Clustered           | 2 VC_579_61  | 2   | 0.0032 | 0.64519808 | 0.002  | 0 | 0 | 0 | 1 Ref      |
| MH051261 | Unassigned | Unassigned | Unassigned | 579_7   | Clustered/Singleton | 1 VC_579_7   | 1   | 0      | 1          | 0      | 0 | 0 | 0 | 1 Ref      |
| MH051264 | Unassigned | Unassigned | Unassigned | 384_5   | Clustered           | 2 VC_384_5   | 2   | 0.0035 | 0.95771071 | 0.0033 | 0 | 0 | 0 | 1 Ref      |
| MH051265 | Unassigned | Unassigned | Unassigned | 527_0   | Clustered           | 37 VC_527_0  | 37  | 0.9679 | 1          | 0.9679 | 0 | 0 | 0 | 1 Ref      |
| MH051266 | Unassigned | Unassigned | Unassigned | 579_50  | Clustered           | 15 VC_579_50 | 15  | 0.0467 | 1          | 0.0467 | 0 | 0 | 0 | 0.9238 Ref |
| MH051333 | Unassigned | Unassigned | Unassigned | 871_1   | Clustered           | 26 VC_871_1  | 26  | 0.6303 | 1          | 0.6303 | 0 | 0 | 0 | 0.9815 Ref |
| MH051334 | Unassigned | Unassigned | Unassigned | 655_0   | Clustered           | 45 VC_655_0  | 45  | 0.7722 | 1          | 0.7722 | 0 | 0 | 0 | 1 Ref      |
| MH051335 | Unassigned | Unassigned | Unassigned | 636_0   | Clustered           | 13 VC_636_0  | 13  | 0.6223 | 1          | 0.6223 | 0 | 0 | 0 | 1 Ref      |
| MH051911 | Unassigned | Unassigned | Unassigned | 595_0   | Clustered           | 35 VC_595_0  | 35  | 0.8809 | 1          | 0.8809 | 0 | 0 | 0 | 1 Ref      |
| MH051912 | Unassigned | Unassigned | Unassigned | 595_0   | Clustered           | 35 VC_595_0  | 35  | 0.8809 | 1          | 0.8809 | 0 | 0 | 0 | 1 Ref      |
| MH051913 | Unassigned | Unassigned | Unassigned | 297_6   | Clustered           | 12 VC_297_6  | 12  | 0.1139 | 1          | 0.1139 | 0 | 0 | 0 | 0.8182 Ref |
| MH051914 | Unassigned | Unassigned | Unassigned | 340_21  | Clustered/Singleton | 1 VC_340_21  | 1   | 0      | 1          | 0      | 0 | 0 | 0 | 1 Ref      |
| MH051915 | Unassigned | Unassigned | Unassigned | 290_151 | Clustered/Singleton | 1 VC_290_151 | 1   | 0      | 1          | 0      | 0 | 0 | 0 | 1 Ref      |
| MH051916 | Unassigned | Unassigned | Unassigned | 290_170 | Clustered/Singleton | 1 VC_290_170 | 1   | 0      | 1          | 0      | 0 | 0 | 0 | 1 Ref      |
| MH051917 | Unassigned | Unassigned | Unassigned | 297_5   | Clustered           | 14 VC_297_5  | 14  | 0.141  | 1          | 0.141  | 0 | 0 | 0 | 0.9231 Ref |
| MH051918 | Unassigned | Unassigned | Unassigned | 596_0   | Clustered           | 4 VC_596_0   | 4   | 0.0604 | 0.99998766 | 0.0604 | 0 | 0 | 0 | 1 Ref      |
| MH059632 | Unassigned | Unassigned | Unassigned | 472_0   | Clustered           | 5 VC_472_0   | 5   | 0.1909 | 0.99999997 | 0.1909 | 0 | 0 | 0 | 1 Ref      |
| MH059635 | Unassigned | Unassigned | Unassigned | 119_0   | Clustered           | 9 VC_119_0   | 9   | 0.9977 | 0.98988637 | 0.9876 | 0 | 0 | 0 | 1 Ref      |
| MH059636 | Unassigned | Unassigned | Unassigned | 508_5   | Clustered/Singleton | 1 VC_508_5   | 1   | 0      | 1          | 0      | 0 | 0 | 0 | 1 Ref      |
| MH059638 | Unassigned | Unassigned | Unassigned | 865_0   | Clustered           | 10 VC_865_0  | 10  | 0.5975 | 1          | 0.5975 | 0 | 0 | 0 | 1 Ref      |
| MH059639 | Unassigned | Unassigned | Unassigned | 406_0   | Clustered           | 7 VC_406_0   | 7   | 0.176  | 1          | 0.176  | 0 | 0 | 0 | 1 Ref      |
| MH077576 | Unassigned | Unassigned | Unassigned | 223_6   | Clustered           | 42 VC_223_6  | 42  | 0.4717 | 1          | 0.4717 | 0 | 0 | 0 | 0.8351 Ref |
| MH077577 | Unassigned | Unassigned | Unassigned | 243_0   | Clustered           | 72 VC_243_0  | 72  | 0.8089 | 1          | 0.8089 | 0 | 0 | 0 | 1 Ref      |
| MH077578 | Unassigned | Unassigned | Unassigned | 538_34  | Clustered/Singleton | 1 VC_538_34  | 1   | 0      | 1          | 0      | 0 | 0 | 0 | 1 Ref      |
| MH077579 | Unassigned | Unassigned | Unassigned | 566_4   | Clustered           | 16 VC_566_4  | 16  | 0.2517 | 0.99999998 | 0.2517 | 0 | 0 | 0 | 0.9417 Ref |
| MH077580 | Unassigned | Unassigned | Unassigned | 538_31  | Clustered           | 11 VC_538_31 | 11  | 0.0894 | 1          | 0.0894 | 0 | 0 | 0 | 0.6 Ref    |
| MH077581 | Unassigned | Unassigned | Unassigned | 535_1   | Clustered           | 108 VC_535_1 | 108 | 0.8479 | 1          | 0.8479 | 0 | 0 | 0 | 0.9955 Ref |
| MH077582 | Unassigned | Unassigned | Unassigned | 384_2   | Clustered           | 8 VC_384_2   | 8   | 0.0232 | 1          | 0.0232 | 0 | 0 | 0 | 0.8571 Ref |
| MH077583 | Unassigned | Unassigned | Unassigned | 532_0   | Clustered           | 75 VC_532_0  | 75  | 0.9393 | 1          | 0.9393 | 0 | 0 | 0 | 1 Ref      |
| MH077584 | Unassigned | Unassigned | Unassigned | 783_0   | Clustered           | 67 VC_783_0  | 67  | 0.8945 | 1          | 0.8945 | 0 | 0 | 0 | 1 Ref      |
| MH102284 | Unassigned | Unassigned | Unassigned | 603_0   | Clustered           | 28 VC_603_0  | 28  | 0.7692 | 1          | 0.7692 | 0 | 0 | 0 | 1 Ref      |
| MH102285 | Unassigned | Unassigned | Unassigned | 198_23  | Clustered           | 10 VC_198_23 | 10  | 0.0697 | 1          | 0.0697 | 0 | 0 | 0 | 0.8444 Ref |
| MH105773 | Unassigned | Unassigned | Unassigned | 627_0   | Clustered           | 16 VC_627_0  | 16  | 0.9168 | 1          | 0.9168 | 0 | 0 | 0 | 1 Ref      |
| MH107028 | Unassigned | Unassigned | Unassigned | 868_0   | Clustered           | 27 VC_868_0  | 27  | 0.9372 | 1          | 0.9372 | 0 | 0 | 0 | 1 Ref      |
| MH107118 | Unassigned | Unassigned | Unassigned | 98_0    | Clustered           | 30 VC_98_0   | 30  | 0.7175 | 1          | 0.7175 | 0 | 0 | 0 | 1 Ref      |
| MH107769 | Unassigned | Unassigned | Unassigned | 155_12  | Clustered           | 2 VC_155_12  | 2   | 0.0044 | 0.82943952 | 0.0037 | 0 | 0 | 0 | 1 Ref      |
| MH107770 | Unassigned | Unassigned | Unassigned | 434_0   | Clustered           | 45 VC_434_0  | 45  | 0.9479 | 1          | 0.9479 | 0 | 0 | 0 | 1 Ref      |
| MH113812 | Unassigned | Unassigned | Unassigned | 1067_0  | Clustered           | 20 VC_1067_0 | 20  | 0.7109 | 1          | 0.7109 | 0 | 0 | 0 | 1 Ref      |
| MH113813 | Unassigned | Unassigned | Unassigned | 1067_0  | Clustered           | 20 VC_1067_0 | 20  | 0.7109 | 1          | 0.7109 | 0 | 0 | 0 | 1 Ref      |
| MH113814 | Unassigned | Unassigned | Unassigned | 1067_0  | Clustered           | 20 VC_1067_0 | 20  | 0.7109 | 1          | 0.7109 | 0 | 0 | 0 | 1 Ref      |
| MH113815 | Unassigned | Unassigned | Unassigned | 1067_0  | Clustered           | 20 VC_1067_0 | 20  | 0.7109 | 1          | 0.7109 | 0 | 0 | 0 | 1 Ref      |
| MH115576 | Unassigned | Unassigned | Unassigned | 441_1   | Clustered           | 8 VC_441_1   | 8   | 0.5443 | 1          | 0.5443 | 0 | 0 | 0 | 0.9643 Ref |
| MH128984 | Unassigned | Unassigned | Unassigned | 286_0   | Clustered           | 2 VC_286_0   | 2   | 0.1926 | 0.95154944 | 0.1832 | 0 | 0 | 0 | 1 Ref      |
| MH133207 | Unassigned | Unassigned | Unassigned | 716_1   | Clustered           | 2 VC_716_1   | 2   | 0.1291 | 0.95114164 | 0.1227 | 0 | 0 | 0 | 1 Ref      |
| MH136584 | Unassigned | Unassigned | Unassigned | 155_8   | Clustered           | 66 VC_155_8  | 66  | 0.4537 | 1          | 0.4537 | 0 | 0 | 0 | 0.8182 Ref |
| MH142219 | Unassigned | Unassigned | Unassigned | 25_0    | Clustered           | 3 VC_25_0    | 3   | 0.3393 | 0.99845192 | 0.3388 | 0 | 0 | 0 | 1 Ref      |
| MH142220 | Unassigned | Unassigned | Unassigned | 25_0    | Clustered           | 3 VC_25_0    | 3   | 0.3393 | 0.99845192 | 0.3388 | 0 | 0 | 0 | 1 Ref      |
| MH153799 | Unassigned | Unassigned | Unassigned | 1411_0  | Clustered           | 5 VC_1411_0  | 5   | 0.5446 | 0.99999985 | 0.5446 | 0 | 0 | 0 | 1 Ref      |
| MH153800 | Unassigned | Unassigned | Unassigned | 899_0   | Clustered           | 2 VC_899_0   | 2   | 0.0476 | 0.95725601 | 0.0456 | 0 | 0 | 0 | 1 Ref      |
| MH153801 | Unassigned | Unassigned | Unassigned | 899_1   | Clustered/Singleton | 1 VC_899_1   | 1   | 0      | 1          | 0      | 0 | 0 | 0 | 1 Ref      |
| MH153802 | Unassigned | Unassigned | Unassigned | 1296_0  | Clustered           | 82 VC_1296_0 | 82  | 0.7938 | 1          | 0.7938 | 0 | 0 | 0 | 1 Ref      |
| MH153803 | Unassigned | Unassigned | Unassigned | 1212_0  | Clustered           | 21 VC_1212_0 | 21  | 0.711  | 1          | 0.711  | 0 | 0 | 0 | 1 Ref      |
| MH153804 | Unassigned | Unassigned | Unassigned | 741_0   | Clustered           | 3 VC_741_0   | 3   | 0.038  | 0.88651    | 0.0337 | 0 | 0 | 0 | 1 Ref      |
| MH153805 | Unassigned | Unassigned | Unassigned | 1296_0  | Clustered           | 82 VC_1296_0 | 82  | 0.7938 | 1          | 0.7938 | 0 | 0 | 0 | 1 Ref      |
| MH153806 | Unassigned | Unassigned | Unassigned | 1296_0  | Clustered           | 82 VC_1296_0 | 82  | 0.7938 | 1          | 0.7938 | 0 | 0 | 0 | 1 Ref      |
| MH153807 | Unassigned | Unassigned | Unassigned | 1113_0  | Clustered           | 2 VC_1113_0  | 2   | 0.127  | 0.95375267 | 0.1212 | 0 | 0 | 0 | 1 Ref      |
| MH153808 | Unassigned | Unassigned | Unassigned | 1217_0  | Clustered           | 41 VC_1217_0 | 41  | 0.9546 | 1          | 0.9546 | 0 | 0 | 0 | 0.9976 Ref |
| MH153809 | Unassigned | Unassigned | Unassigned | 1136_0  | Clustered           | 40 VC_1136_0 | 40  | 0.8746 | 1          | 0.8746 | 0 | 0 | 0 | 1 Ref      |
| MH153810 | Unassigned | Unassigned | Unassigned | 528_0   | Clustered           | 12 VC_528_0  | 12  | 0.3923 | 1          | 0.3923 | 0 | 0 | 0 | 0.9697 Ref |
| MH153811 | Unassigned | Unassigned | Unassigned | 1296_0  | Clustered           | 82 VC_1296_0 | 82  | 0.7938 | 1          | 0.7938 | 0 | 0 | 0 | 1 Ref      |
| MH153812 | Unassigned | Unassigned | Unassigned | 1113_0  | Clustered           | 2 VC_1113_0  | 2   | 0.127  | 0.95375267 | 0.1212 | 0 | 0 | 0 | 1 Ref      |
| MH153813 | Unassigned | Unassigned | Unassigned | 1212_0  | Clustered           | 21 VC_1212_0 | 21  | 0.711  | 1          | 0.711  | 0 | 0 | 0 | 1 Ref      |
| MH155864 | Unassigned | Unassigned | Unassigned | 532_0   | Clustered           | 75 VC_532_0  | 75  | 0.9393 | 1          | 0.9393 | 0 | 0 | 0 | 1 Ref      |
| MH155865 | Unassigned | Unassigned | Unassigned | 538_38  | Clustered           | 6 VC_538_38  | 6   | 0.0517 | 1          | 0.0517 | 0 | 0 | 0 | 0.8667 Ref |
| MH155866 | Unassigned | Unassigned | Unassigned | 538_4   | Clustered/Singleton | 1 VC_538_4   | 1   | 0      | 1          | 0      | 0 | 0 | 0 | 1 Ref      |
| MH155868 | Unassigned | Unassigned | Unassigned | 1278_0  | Clustered           | 19 VC_1278_0 | 19  | 1      | 1          | 1      | 0 | 0 | 0 | 1 Ref      |



|           |            |            |            |         |                     |              |     |        |            |        |   |   |   |            |
|-----------|------------|------------|------------|---------|---------------------|--------------|-----|--------|------------|--------|---|---|---|------------|
| MHI55870  | Unassigned | Unassigned | Unassigned | 1414_0  | Clustered           | 2 VC_1414_0  | 2   | 1      | 1          | 1      | 0 | 0 | 0 | 1 Ref      |
| MHI55871  | Unassigned | Unassigned | Unassigned | 538_38  | Clustered           | 6 VC_538_38  | 6   | 0.0517 | 1          | 0.0517 | 0 | 0 | 0 | 0.8667 Ref |
| MHI55873  | Unassigned | Unassigned | Unassigned | 1415_0  | Clustered           | 31 VC_1415_0 | 31  | 0.8456 | 1          | 0.8456 | 0 | 0 | 0 | 1 Ref      |
| MHI55874  | Unassigned | Unassigned | Unassigned | 384_13  | Clustered           | 33 VC_384_13 | 33  | 0.1785 | 1          | 0.1785 | 0 | 0 | 0 | 0.8769 Ref |
| MHI55875  | Unassigned | Unassigned | Unassigned | 535_1   | Clustered           | 108 VC_535_1 | 108 | 0.8479 | 1          | 0.8479 | 0 | 0 | 0 | 0.9955 Ref |
| MHI55876  | Unassigned | Unassigned | Unassigned | 230_0   | Clustered           | 38 VC_230_0  | 38  | 0.9076 | 1          | 0.9076 | 0 | 0 | 0 | 1 Ref      |
| MHI55877  | Unassigned | Unassigned | Unassigned | 901_0   | Clustered           | 31 VC_901_0  | 31  | 0.8235 | 1          | 0.8235 | 0 | 0 | 0 | 0.8194 Ref |
| MHI55879  | Unassigned | Unassigned | Unassigned | 535_1   | Clustered           | 108 VC_535_1 | 108 | 0.8479 | 1          | 0.8479 | 0 | 0 | 0 | 0.9955 Ref |
| MHI55880  | Unassigned | Unassigned | Unassigned | 901_0   | Clustered           | 31 VC_901_0  | 31  | 0.8235 | 1          | 0.8235 | 0 | 0 | 0 | 0.8194 Ref |
| MHI59197  | Unassigned | Unassigned | Unassigned | 155_15  | Clustered           | 16 VC_155_15 | 16  | 0.0779 | 1          | 0.0779 | 0 | 0 | 0 | 0.8083 Ref |
| MHI60392  | Unassigned | Unassigned | Unassigned | 801_2   | Clustered           | 5 VC_801_2   | 5   | 0.087  | 0.99999997 | 0.087  | 0 | 0 | 0 | 1 Ref      |
| MHI60766  | Unassigned | Unassigned | Unassigned | 871_1   | Clustered           | 26 VC_871_1  | 26  | 0.6303 | 1          | 0.6303 | 0 | 0 | 0 | 0.9815 Ref |
| MHI60767  | Unassigned | Unassigned | Unassigned | 254_0   | Clustered           | 14 VC_254_0  | 14  | 0.9118 | 1          | 0.9118 | 0 | 0 | 0 | 0.967 Ref  |
| MHI65274  | Unassigned | Unassigned | Unassigned | 510_1   | Clustered           | 20 VC_510_1  | 20  | 0.4172 | 1          | 0.4172 | 0 | 0 | 0 | 1 Ref      |
| MHI71093  | Unassigned | Unassigned | Unassigned | 1016_0  | Clustered           | 62 VC_1016_0 | 62  | 0.8638 | 1          | 0.8638 | 0 | 0 | 0 | 0.743 Ref  |
| MHI71094  | Unassigned | Unassigned | Unassigned | 1016_0  | Clustered           | 62 VC_1016_0 | 62  | 0.8638 | 1          | 0.8638 | 0 | 0 | 0 | 0.743 Ref  |
| MHI71095  | Unassigned | Unassigned | Unassigned | 1016_0  | Clustered           | 62 VC_1016_0 | 62  | 0.8638 | 1          | 0.8638 | 0 | 0 | 0 | 0.743 Ref  |
| MHI71096  | Unassigned | Unassigned | Unassigned | 1016_0  | Clustered           | 62 VC_1016_0 | 62  | 0.8638 | 1          | 0.8638 | 0 | 0 | 0 | 0.743 Ref  |
| MHI71097  | Unassigned | Unassigned | Unassigned | 1016_0  | Clustered           | 62 VC_1016_0 | 62  | 0.8638 | 1          | 0.8638 | 0 | 0 | 0 | 0.743 Ref  |
| MHI71098  | Unassigned | Unassigned | Unassigned | 1016_0  | Clustered           | 62 VC_1016_0 | 62  | 0.8638 | 1          | 0.8638 | 0 | 0 | 0 | 0.743 Ref  |
| MHI72261  | Unassigned | Unassigned | Unassigned | 848_0   | Clustered           | 124 VC_848_0 | 124 | 0.9484 | 1          | 0.9484 | 0 | 0 | 0 | 1 Ref      |
| MHI72262  | Unassigned | Unassigned | Unassigned | 848_0   | Clustered           | 124 VC_848_0 | 124 | 0.9484 | 1          | 0.9484 | 0 | 0 | 0 | 1 Ref      |
| MHI72263  | Unassigned | Unassigned | Unassigned | 848_0   | Clustered           | 124 VC_848_0 | 124 | 0.9484 | 1          | 0.9484 | 0 | 0 | 0 | 1 Ref      |
| MHI72264  | Unassigned | Unassigned | Unassigned | 848_0   | Clustered           | 124 VC_848_0 | 124 | 0.9484 | 1          | 0.9484 | 0 | 0 | 0 | 1 Ref      |
| MHI78096  | Unassigned | Unassigned | Unassigned | 36_0    | Clustered           | 4 VC_36_0    | 4   | 0.0597 | 0.99994573 | 0.0597 | 0 | 0 | 0 | 1 Ref      |
| MHI78381  | Unassigned | Unassigned | Unassigned | 891_0   | Clustered           | 11 VC_891_0  | 11  | 0.9663 | 1          | 0.9663 | 0 | 0 | 0 | 1 Ref      |
| MHI78382  | Unassigned | Unassigned | Unassigned | 891_0   | Clustered           | 11 VC_891_0  | 11  | 0.9663 | 1          | 0.9663 | 0 | 0 | 0 | 1 Ref      |
| MHI79470  | Unassigned | Unassigned | Unassigned | 1233_0  | Clustered           | 9 VC_1233_0  | 9   | 0.9676 | 1          | 0.9676 | 0 | 0 | 0 | 1 Ref      |
| MHI79471  | Unassigned | Unassigned | Unassigned | 1233_0  | Clustered           | 9 VC_1233_0  | 9   | 0.9676 | 1          | 0.9676 | 0 | 0 | 0 | 1 Ref      |
| MHI79472  | Unassigned | Unassigned | Unassigned | 132_0   | Clustered           | 19 VC_132_0  | 19  | 0.6051 | 1          | 0.6051 | 0 | 0 | 0 | 1 Ref      |
| MHI79473  | Unassigned | Unassigned | Unassigned | 907_0   | Clustered           | 32 VC_907_0  | 32  | 0.9964 | 1          | 0.9964 | 0 | 0 | 0 | 1 Ref      |
| MHI79474  | Unassigned | Unassigned | Unassigned | 380_0   | Clustered           | 6 VC_380_0   | 6   | 0.51   | 1          | 0.51   | 0 | 0 | 0 | 1 Ref      |
| MHI79475  | Unassigned | Unassigned | Unassigned | 132_0   | Clustered           | 19 VC_132_0  | 19  | 0.6051 | 1          | 0.6051 | 0 | 0 | 0 | 1 Ref      |
| MHI79476  | Unassigned | Unassigned | Unassigned | 619_2   | Clustered           | 10 VC_619_2  | 10  | 0.3034 | 1          | 0.3034 | 0 | 0 | 0 | 1 Ref      |
| MHI79477  | Unassigned | Unassigned | Unassigned | 619_2   | Clustered           | 10 VC_619_2  | 10  | 0.3034 | 1          | 0.3034 | 0 | 0 | 0 | 1 Ref      |
| MHI79478  | Unassigned | Unassigned | Unassigned | 132_0   | Clustered           | 19 VC_132_0  | 19  | 0.6051 | 1          | 0.6051 | 0 | 0 | 0 | 1 Ref      |
| MHI79479  | Unassigned | Unassigned | Unassigned | 1233_0  | Clustered           | 9 VC_1233_0  | 9   | 0.9676 | 1          | 0.9676 | 0 | 0 | 0 | 1 Ref      |
| MHI79480  | Unassigned | Unassigned | Unassigned | 866_0   | Clustered           | 2 VC_866_0   | 2   | 0.0566 | 0.95560116 | 0.0541 | 0 | 0 | 0 | 1 Ref      |
| MHI81876  | Unassigned | Unassigned | Unassigned | 440_0   | Clustered           | 33 VC_440_0  | 33  | 0.992  | 1          | 0.992  | 0 | 0 | 0 | 1 Ref      |
| MHI83162  | Unassigned | Unassigned | Unassigned | 1408_1  | Clustered           | 2 VC_1408_1  | 2   | 0.0937 | 0.95622325 | 0.0896 | 0 | 0 | 0 | 1 Ref      |
| MHI91398  | Unassigned | Unassigned | Unassigned | 816_0   | Clustered           | 35 VC_816_0  | 35  | 0.9824 | 1          | 0.9824 | 0 | 0 | 0 | 1 Ref      |
| MHI93369  | Unassigned | Unassigned | Unassigned | 711_0   | Clustered           | 48 VC_711_0  | 48  | 0.8217 | 1          | 0.8217 | 0 | 0 | 0 | 1 Ref      |
| MH203051  | Unassigned | Unassigned | Unassigned | 198_22  | Clustered           | 3 VC_198_22  | 3   | 0.0183 | 0.99859679 | 0.0183 | 0 | 0 | 0 | 1 Ref      |
| MH203383  | Unassigned | Unassigned | Unassigned | 711_0   | Clustered           | 48 VC_711_0  | 48  | 0.8217 | 1          | 0.8217 | 0 | 0 | 0 | 1 Ref      |
| MH203384  | Unassigned | Unassigned | Unassigned | 711_0   | Clustered           | 48 VC_711_0  | 48  | 0.8217 | 1          | 0.8217 | 0 | 0 | 0 | 1 Ref      |
| MH206183  | Unassigned | Unassigned | Unassigned | 184_0   | Clustered           | 5 VC_184_0   | 5   | 0.7721 | 0.99998991 | 0.7721 | 0 | 0 | 0 | 1 Ref      |
| MH206184  | Unassigned | Unassigned | Unassigned | 184_0   | Clustered           | 5 VC_184_0   | 5   | 0.7721 | 0.99998991 | 0.7721 | 0 | 0 | 0 | 1 Ref      |
| MH218848  | Unassigned | Unassigned | Unassigned | 184_0   | Clustered           | 5 VC_184_0   | 5   | 0.7721 | 0.99998991 | 0.7721 | 0 | 0 | 0 | 1 Ref      |
| MH220877  | Unassigned | Unassigned | Unassigned | 281_0   | Clustered           | 2 VC_281_0   | 2   | 0.0753 | 0.9540953  | 0.0719 | 0 | 0 | 0 | 1 Ref      |
| MH2221128 | Unassigned | Unassigned | Unassigned | 994_6   | Clustered/Singleton | 1 VC_994_6   | 1   | 0      | 1          | 0      | 0 | 0 | 0 | 1 Ref      |
| MH2221129 | Unassigned | Unassigned | Unassigned | 994_5   | Clustered           | 19 VC_994_5  | 19  | 0.2622 | 1          | 0.2622 | 0 | 0 | 0 | 1 Ref      |
| MH229862  | Unassigned | Unassigned | Unassigned | 1416_0  | Clustered           | 10 VC_1416_0 | 10  | 1      | 1          | 1      | 0 | 0 | 0 | 1 Ref      |
| MH229863  | Unassigned | Unassigned | Unassigned | 1416_0  | Clustered           | 10 VC_1416_0 | 10  | 1      | 1          | 1      | 0 | 0 | 0 | 1 Ref      |
| MH229864  | Unassigned | Unassigned | Unassigned | 1416_0  | Clustered           | 10 VC_1416_0 | 10  | 1      | 1          | 1      | 0 | 0 | 0 | 1 Ref      |
| MH229865  | Unassigned | Unassigned | Unassigned | 1416_0  | Clustered           | 10 VC_1416_0 | 10  | 1      | 1          | 1      | 0 | 0 | 0 | 1 Ref      |
| MH230177  | Unassigned | Unassigned | Unassigned | 819_0   | Clustered           | 19 VC_819_0  | 19  | 0.6835 | 1          | 0.6835 | 0 | 0 | 0 | 1 Ref      |
| MH230874  | Unassigned | Unassigned | Unassigned | 384_11  | Clustered           | 31 VC_384_11 | 31  | 0.0926 | 1          | 0.0926 | 0 | 0 | 0 | 0.7011 Ref |
| MH230875  | Unassigned | Unassigned | Unassigned | 384_3   | Clustered           | 22 VC_384_3  | 22  | 0.0786 | 1          | 0.0786 | 0 | 0 | 0 | 0.9048 Ref |
| MH230876  | Unassigned | Unassigned | Unassigned | 335_24  | Clustered           | 3 VC_335_24  | 3   | 0.009  | 0.99853949 | 0.0089 | 0 | 0 | 0 | 1 Ref      |
| MH230877  | Unassigned | Unassigned | Unassigned | 535_1   | Clustered           | 108 VC_535_1 | 108 | 0.8479 | 1          | 0.8479 | 0 | 0 | 0 | 0.9955 Ref |
| MH230878  | Unassigned | Unassigned | Unassigned | 335_54  | Clustered           | 5 VC_335_54  | 5   | 0.0147 | 0.99999078 | 0.0147 | 0 | 0 | 0 | 0.7 Ref    |
| MH243438  | Unassigned | Unassigned | Unassigned | 293_1   | Clustered           | 21 VC_293_1  | 21  | 0.1694 | 1          | 0.1694 | 0 | 0 | 0 | 0.9048 Ref |
| MH243439  | Unassigned | Unassigned | Unassigned | 290_181 | Clustered/Singleton | 1 VC_290_181 | 1   | 0      | 1          | 0      | 0 | 0 | 0 | 1 Ref      |
| MH248069  | Unassigned | Unassigned | Unassigned | 929_0   | Clustered           | 10 VC_929_0  | 10  | 0.7185 | 1          | 0.7185 | 0 | 0 | 0 | 1 Ref      |
| MH248138  | Unassigned | Unassigned | Unassigned | 68_3    | Clustered           | 20 VC_68_3   | 20  | 0.3537 | 1          | 0.3537 | 0 | 0 | 0 | 1 Ref      |
| MH248947  | Unassigned | Unassigned | Unassigned | 1016_0  | Clustered           | 62 VC_1016_0 | 62  | 0.8638 | 1          | 0.8638 | 0 | 0 | 0 | 0.743 Ref  |
| MH252123  | Unassigned | Unassigned | Unassigned | 871_1   | Clustered           | 26 VC_871_1  | 26  | 0.6303 | 1          | 0.6303 | 0 | 0 | 0 | 0.9815 Ref |
| MH252365  | Unassigned | Unassigned | Unassigned | 127_0   | Clustered           | 17 VC_127_0  | 17  | 0.9222 | 1          | 0.9222 | 0 | 0 | 0 | 1 Ref      |
| MH268168  | Unassigned | Unassigned | Unassigned | 132_0   | Clustered           | 19 VC_132_0  | 19  | 0.6051 | 1          | 0.6051 | 0 | 0 | 0 | 1 Ref      |
| MH271291  | Unassigned | Unassigned | Unassigned | 991_0   | Clustered           | 39 VC_991_0  | 39  | 1      | 1          | 1      | 0 | 0 | 0 | 1 Ref      |
| MH271292  | Unassigned | Unassigned | Unassigned | 1406_0  | Clustered           | 21 VC_1406_0 | 21  | 0.9836 | 1          | 0.9836 | 0 | 0 | 0 | 1 Ref      |
| MH271293  | Unassigned | Unassigned | Unassigned | 991_0   | Clustered           | 39 VC_991_0  | 39  | 1      | 1          | 1      | 0 | 0 | 0 | 1 Ref      |
| MH271294  | Unassigned | Unassigned | Unassigned | 991_0   | Clustered           | 39 VC_991_0  | 39  | 1      | 1          | 1      | 0 | 0 | 0 | 1 Ref      |
| MH271295  | Unassigned | Unassigned | Unassigned | 1216_0  | Clustered           | 22 VC_1216_0 | 22  | 0.4546 | 1          | 0.4546 | 0 | 0 | 0 | 1 Ref      |
| MH271296  | Unassigned | Unassigned | Unassigned | 984_0   | Clustered           | 5 VC_984_0   | 5   | 0.1708 | 0.99999984 | 0.1708 | 0 | 0 | 0 | 1 Ref      |
| MH271297  | Unassigned | Unassigned | Unassigned | 991_0   | Clustered           | 39 VC_991_0  | 39  | 1      | 1          | 1      | 0 | 0 | 0 | 1 Ref      |
| MH271298  | Unassigned | Unassigned | Unassigned | 1249_0  | Clustered           | 8 VC_1249_0  | 8   | 0.191  | 1          | 0.191  | 0 | 0 | 0 | 1 Ref      |
| MH271299  | Unassigned | Unassigned | Unassigned | 991_0   | Clustered           | 39 VC_991_0  | 39  | 1      | 1          | 1      | 0 | 0 | 0 | 1 Ref      |
| MH271300  | Unassigned | Unassigned | Unassigned | 881_1   | Clustered           | 13 VC_881_1  | 13  | 0.5859 | 1          | 0.5859 | 0 | 0 | 0 | 1 Ref      |
| MH271301  | Unassigned | Unassigned | Unassigned | 1406_0  | Clustered           | 21 VC_1406_0 | 21  | 0.9836 | 1          | 0.9836 | 0 | 0 | 0 | 1 Ref      |
| MH271302  | Unassigned | Unassigned | Unassigned | 952_0   | Clustered           | 39 VC_952_0  | 39  | 0.9064 | 1          | 0.9064 | 0 | 0 | 0 | 1 Ref      |



|          |            |            |            |        |                     |              |     |        |            |        |   |   |   |            |
|----------|------------|------------|------------|--------|---------------------|--------------|-----|--------|------------|--------|---|---|---|------------|
| MH271303 | Unassigned | Unassigned | Unassigned | 1412_0 | Clustered           | 7 VC_1412_0  | 7   | 0.2471 | 1          | 0.2471 | 0 | 0 | 0 | 1 Ref      |
| MH271304 | Unassigned | Unassigned | Unassigned | 1415_0 | Clustered           | 31 VC_1415_0 | 31  | 0.8456 | 1          | 0.8456 | 0 | 0 | 0 | 1 Ref      |
| MH271305 | Unassigned | Unassigned | Unassigned | 423_0  | Clustered           | 7 VC_423_0   | 7   | 0.7874 | 1          | 0.7874 | 0 | 0 | 0 | 1 Ref      |
| MH271306 | Unassigned | Unassigned | Unassigned | 991_0  | Clustered           | 39 VC_991_0  | 39  | 1      | 1          | 1      | 0 | 0 | 0 | 1 Ref      |
| MH271307 | Unassigned | Unassigned | Unassigned | 881_1  | Clustered           | 13 VC_881_1  | 13  | 0.5859 | 1          | 0.5859 | 0 | 0 | 0 | 1 Ref      |
| MH271308 | Unassigned | Unassigned | Unassigned | 1249_0 | Clustered           | 8 VC_1249_0  | 8   | 0.191  | 1          | 0.191  | 0 | 0 | 0 | 1 Ref      |
| MH271309 | Unassigned | Unassigned | Unassigned | 991_0  | Clustered           | 39 VC_991_0  | 39  | 1      | 1          | 1      | 0 | 0 | 0 | 1 Ref      |
| MH271310 | Unassigned | Unassigned | Unassigned | 881_1  | Clustered           | 13 VC_881_1  | 13  | 0.5859 | 1          | 0.5859 | 0 | 0 | 0 | 1 Ref      |
| MH271311 | Unassigned | Unassigned | Unassigned | 991_0  | Clustered           | 39 VC_991_0  | 39  | 1      | 1          | 1      | 0 | 0 | 0 | 1 Ref      |
| MH271312 | Unassigned | Unassigned | Unassigned | 1415_0 | Clustered           | 31 VC_1415_0 | 31  | 0.8456 | 1          | 0.8456 | 0 | 0 | 0 | 1 Ref      |
| MH271313 | Unassigned | Unassigned | Unassigned | 590_0  | Clustered           | 9 VC_590_0   | 9   | 0.4952 | 1          | 0.4952 | 0 | 0 | 0 | 1 Ref      |
| MH271314 | Unassigned | Unassigned | Unassigned | 991_0  | Clustered           | 39 VC_991_0  | 39  | 1      | 1          | 1      | 0 | 0 | 0 | 1 Ref      |
| MH271315 | Unassigned | Unassigned | Unassigned | 991_0  | Clustered           | 39 VC_991_0  | 39  | 1      | 1          | 1      | 0 | 0 | 0 | 1 Ref      |
| MH271316 | Unassigned | Unassigned | Unassigned | 881_1  | Clustered           | 13 VC_881_1  | 13  | 0.5859 | 1          | 0.5859 | 0 | 0 | 0 | 1 Ref      |
| MH271317 | Unassigned | Unassigned | Unassigned | 1244_0 | Clustered           | 4 VC_1244_0  | 4   | 0.8666 | 0.9999992  | 0.8666 | 0 | 0 | 0 | 1 Ref      |
| MH271318 | Unassigned | Unassigned | Unassigned | 423_0  | Clustered           | 7 VC_423_0   | 7   | 0.7874 | 1          | 0.7874 | 0 | 0 | 0 | 1 Ref      |
| MH271319 | Unassigned | Unassigned | Unassigned | 991_0  | Clustered           | 39 VC_991_0  | 39  | 1      | 1          | 1      | 0 | 0 | 0 | 1 Ref      |
| MH271320 | Unassigned | Unassigned | Unassigned | 1249_0 | Clustered           | 8 VC_1249_0  | 8   | 0.191  | 1          | 0.191  | 0 | 0 | 0 | 1 Ref      |
| MH271321 | Unassigned | Unassigned | Unassigned | 1415_0 | Clustered           | 31 VC_1415_0 | 31  | 0.8456 | 1          | 0.8456 | 0 | 0 | 0 | 1 Ref      |
| MH285980 | Unassigned | Unassigned | Unassigned | 595_0  | Clustered           | 35 VC_595_0  | 35  | 0.8809 | 1          | 0.8809 | 0 | 0 | 0 | 1 Ref      |
| MH299806 | Unassigned | Unassigned | Unassigned | 1002_0 | Clustered           | 10 VC_1002_0 | 10  | 0.9987 | 1          | 0.9987 | 0 | 0 | 0 | 1 Ref      |
| MH310933 | Unassigned | Unassigned | Unassigned | 513_0  | Clustered           | 39 VC_513_0  | 39  | 0.3078 | 1          | 0.3078 | 0 | 0 | 0 | 1 Ref      |
| MH310934 | Unassigned | Unassigned | Unassigned | 513_1  | Clustered           | 41 VC_513_1  | 41  | 0.3276 | 1          | 0.3276 | 0 | 0 | 0 | 0.911 Ref  |
| MH310935 | Unassigned | Unassigned | Unassigned | 513_0  | Clustered           | 39 VC_513_0  | 39  | 0.3078 | 1          | 0.3078 | 0 | 0 | 0 | 1 Ref      |
| MH310936 | Unassigned | Unassigned | Unassigned | 513_1  | Clustered           | 41 VC_513_1  | 41  | 0.3276 | 1          | 0.3276 | 0 | 0 | 0 | 0.911 Ref  |
| MH316561 | Unassigned | Unassigned | Unassigned | 579_14 | Clustered           | 8 VC_579_14  | 8   | 0.0227 | 0.99904117 | 0.0227 | 0 | 0 | 0 | 0.8214 Ref |
| MH316562 | Unassigned | Unassigned | Unassigned | 585_0  | Clustered           | 20 VC_585_0  | 20  | 0.8376 | 1          | 0.8376 | 0 | 0 | 0 | 1 Ref      |
| MH316563 | Unassigned | Unassigned | Unassigned | 531_0  | Clustered           | 32 VC_531_0  | 32  | 0.6859 | 1          | 0.6859 | 0 | 0 | 0 | 1 Ref      |
| MH316564 | Unassigned | Unassigned | Unassigned | 538_45 | Clustered           | 7 VC_538_45  | 7   | 0.0632 | 1          | 0.0632 | 0 | 0 | 0 | 0.8095 Ref |
| MH316565 | Unassigned | Unassigned | Unassigned | 527_0  | Clustered           | 37 VC_527_0  | 37  | 0.9679 | 1          | 0.9679 | 0 | 0 | 0 | 1 Ref      |
| MH316566 | Unassigned | Unassigned | Unassigned | 231_0  | Clustered           | 19 VC_231_0  | 19  | 0.9378 | 1          | 0.9378 | 0 | 0 | 0 | 1 Ref      |
| MH316567 | Unassigned | Unassigned | Unassigned | 579_50 | Clustered           | 15 VC_579_50 | 15  | 0.0467 | 1          | 0.0467 | 0 | 0 | 0 | 0.9238 Ref |
| MH316568 | Unassigned | Unassigned | Unassigned | 384_13 | Clustered           | 33 VC_384_13 | 33  | 0.1785 | 1          | 0.1785 | 0 | 0 | 0 | 0.8769 Ref |
| MH316569 | Unassigned | Unassigned | Unassigned | 991_0  | Clustered           | 39 VC_991_0  | 39  | 1      | 1          | 1      | 0 | 0 | 0 | 1 Ref      |
| MH316570 | Unassigned | Unassigned | Unassigned | 539_0  | Clustered           | 37 VC_539_0  | 37  | 0.911  | 1          | 0.911  | 0 | 0 | 0 | 1 Ref      |
| MH319720 | Unassigned | Unassigned | Unassigned | 452_0  | Clustered           | 6 VC_452_0   | 6   | 0.0909 | 0.9999413  | 0.0909 | 0 | 0 | 0 | 1 Ref      |
| MH319733 | Unassigned | Unassigned | Unassigned | 452_0  | Clustered           | 6 VC_452_0   | 6   | 0.0909 | 0.9999413  | 0.0909 | 0 | 0 | 0 | 1 Ref      |
| MH319737 | Unassigned | Unassigned | Unassigned | 678_0  | Clustered           | 2 VC_678_0   | 2   | 0.0249 | 0.58574469 | 0.0146 | 0 | 0 | 0 | 1 Ref      |
| MH319742 | Unassigned | Unassigned | Unassigned | 452_0  | Clustered           | 6 VC_452_0   | 6   | 0.0909 | 0.9999413  | 0.0909 | 0 | 0 | 0 | 1 Ref      |
| MH319746 | Unassigned | Unassigned | Unassigned | 678_0  | Clustered           | 2 VC_678_0   | 2   | 0.0249 | 0.58574469 | 0.0146 | 0 | 0 | 0 | 1 Ref      |
| MH319749 | Unassigned | Unassigned | Unassigned | 446_6  | Clustered/Singleton | 1 VC_446_6   | 1   | 0      | 1          | 0      | 0 | 1 | 0 | 1 Ref      |
| MH319750 | Unassigned | Unassigned | Unassigned | 453_0  | Clustered           | 2 VC_453_0   | 2   | 0.0289 | 0.90638816 | 0.0262 | 0 | 0 | 0 | 1 Ref      |
| MH319753 | Unassigned | Unassigned | Unassigned | 452_0  | Clustered           | 6 VC_452_0   | 6   | 0.0909 | 0.9999413  | 0.0909 | 0 | 0 | 0 | 1 Ref      |
| MH319754 | Unassigned | Unassigned | Unassigned | 446_7  | Clustered/Singleton | 1 VC_446_7   | 1   | 0      | 1          | 0      | 0 | 1 | 0 | 1 Ref      |
| MH319758 | Unassigned | Unassigned | Unassigned | 452_0  | Clustered           | 6 VC_452_0   | 6   | 0.0909 | 0.9999413  | 0.0909 | 0 | 0 | 0 | 1 Ref      |
| MH319759 | Unassigned | Unassigned | Unassigned | 453_0  | Clustered           | 2 VC_453_0   | 2   | 0.0289 | 0.90638816 | 0.0262 | 0 | 0 | 0 | 1 Ref      |
| MH321490 | Unassigned | Unassigned | Unassigned | 156_0  | Clustered           | 13 VC_156_0  | 13  | 0.2378 | 1          | 0.2378 | 0 | 0 | 0 | 0.9872 Ref |
| MH321491 | Unassigned | Unassigned | Unassigned | 156_0  | Clustered           | 13 VC_156_0  | 13  | 0.2378 | 1          | 0.2378 | 0 | 0 | 0 | 0.9872 Ref |
| MH321492 | Unassigned | Unassigned | Unassigned | 9_0    | Clustered           | 38 VC_9_0    | 38  | 0.4859 | 1          | 0.4859 | 0 | 0 | 0 | 1 Ref      |
| MH321493 | Unassigned | Unassigned | Unassigned | 475_0  | Clustered           | 96 VC_475_0  | 96  | 0.9303 | 1          | 0.9303 | 0 | 0 | 0 | 0.9575 Ref |
| MH327487 | Unassigned | Unassigned | Unassigned | 452_0  | Clustered           | 6 VC_452_0   | 6   | 0.0909 | 0.9999413  | 0.0909 | 0 | 0 | 0 | 1 Ref      |
| MH333064 | Unassigned | Unassigned | Unassigned | 509_0  | Clustered           | 36 VC_509_0  | 36  | 0.5291 | 1          | 0.5291 | 0 | 0 | 0 | 0.9714 Ref |
| MH338234 | Unassigned | Unassigned | Unassigned | 223_6  | Clustered           | 42 VC_223_6  | 42  | 0.4717 | 1          | 0.4717 | 0 | 0 | 0 | 0.8351 Ref |
| MH338235 | Unassigned | Unassigned | Unassigned | 974_0  | Clustered           | 34 VC_974_0  | 34  | 0.7953 | 1          | 0.7953 | 0 | 0 | 0 | 1 Ref      |
| MH338236 | Unassigned | Unassigned | Unassigned | 228_0  | Clustered           | 22 VC_228_0  | 22  | 0.7411 | 1          | 0.7411 | 0 | 0 | 0 | 1 Ref      |
| MH338237 | Unassigned | Unassigned | Unassigned | 228_0  | Clustered           | 22 VC_228_0  | 22  | 0.7411 | 1          | 0.7411 | 0 | 0 | 0 | 1 Ref      |
| MH338238 | Unassigned | Unassigned | Unassigned | 335_19 | Clustered           | 3 VC_335_19  | 3   | 0.0107 | 0.99859221 | 0.0107 | 0 | 0 | 0 | 1 Ref      |
| MH338239 | Unassigned | Unassigned | Unassigned | 335_60 | Clustered           | 2 VC_335_60  | 2   | 0.0038 | 0.957513   | 0.0036 | 0 | 0 | 0 | 1 Ref      |
| MH338240 | Unassigned | Unassigned | Unassigned | 532_0  | Clustered           | 75 VC_532_0  | 75  | 0.9393 | 1          | 0.9393 | 0 | 0 | 0 | 1 Ref      |
| MH338241 | Unassigned | Unassigned | Unassigned | 974_0  | Clustered           | 34 VC_974_0  | 34  | 0.7953 | 1          | 0.7953 | 0 | 0 | 0 | 1 Ref      |
| MH341451 | Unassigned | Unassigned | Unassigned | 394_0  | Clustered           | 3 VC_394_0   | 3   | 0.1582 | 0.99545803 | 0.1575 | 0 | 0 | 0 | 1 Ref      |
| MH341452 | Unassigned | Unassigned | Unassigned | 392_0  | Clustered           | 9 VC_392_0   | 9   | 0.7527 | 1          | 0.7527 | 0 | 0 | 0 | 1 Ref      |
| MH355583 | Unassigned | Unassigned | Unassigned | 711_0  | Clustered           | 48 VC_711_0  | 48  | 0.8217 | 1          | 0.8217 | 0 | 0 | 0 | 1 Ref      |
| MH355584 | Unassigned | Unassigned | Unassigned | 290_45 | Clustered/Singleton | 1 VC_290_45  | 1   | 0      | 1          | 0      | 0 | 0 | 0 | 1 Ref      |
| MH356729 | Unassigned | Unassigned | Unassigned | 862_0  | Clustered           | 29 VC_862_0  | 29  | 0.8594 | 1          | 0.8594 | 0 | 0 | 0 | 1 Ref      |
| MH356730 | Unassigned | Unassigned | Unassigned | 685_1  | Clustered/Singleton | 1 VC_685_1   | 1   | 0      | 1          | 0      | 0 | 0 | 0 | 1 Ref      |
| MH358359 | Unassigned | Unassigned | Unassigned | 654_0  | Clustered           | 115 VC_654_0 | 115 | 0.7303 | 1          | 0.7303 | 0 | 0 | 0 | 0.8764 Ref |
| MH358458 | Unassigned | Unassigned | Unassigned | 801_0  | Clustered           | 37 VC_801_0  | 37  | 0.5672 | 1          | 0.5672 | 0 | 0 | 0 | 1 Ref      |
| MH359124 | Unassigned | Unassigned | Unassigned | 293_11 | Clustered           | 3 VC_293_11  | 3   | 0.0146 | 0.93460284 | 0.0136 | 0 | 0 | 0 | 1 Ref      |
| MH363700 | Unassigned | Unassigned | Unassigned | 136_0  | Clustered           | 3 VC_136_0   | 3   | 0.0934 | 0.99858535 | 0.0932 | 0 | 0 | 0 | 1 Ref      |
| MH363708 | Unassigned | Unassigned | Unassigned | 721_0  | Clustered           | 11 VC_721_0  | 11  | 0.8846 | 1          | 0.8846 | 0 | 0 | 0 | 1 Ref      |
| MH370358 | Unassigned | Unassigned | Unassigned | 654_0  | Clustered           | 115 VC_654_0 | 115 | 0.7303 | 1          | 0.7303 | 0 | 0 | 0 | 0.8764 Ref |
| MH370359 | Unassigned | Unassigned | Unassigned | 654_0  | Clustered           | 115 VC_654_0 | 115 | 0.7303 | 1          | 0.7303 | 0 | 0 | 0 | 0.8764 Ref |
| MH370360 | Unassigned | Unassigned | Unassigned | 654_0  | Clustered           | 115 VC_654_0 | 115 | 0.7303 | 1          | 0.7303 | 0 | 0 | 0 | 0.8764 Ref |
| MH370361 | Unassigned | Unassigned | Unassigned | 654_0  | Clustered           | 115 VC_654_0 | 115 | 0.7303 | 1          | 0.7303 | 0 | 0 | 0 | 0.8764 Ref |
| MH370362 | Unassigned | Unassigned | Unassigned | 654_0  | Clustered           | 115 VC_654_0 | 115 | 0.7303 | 1          | 0.7303 | 0 | 0 | 0 | 0.8764 Ref |
| MH370363 | Unassigned | Unassigned | Unassigned | 654_0  | Clustered           | 115 VC_654_0 | 115 | 0.7303 | 1          | 0.7303 | 0 | 0 | 0 | 0.8764 Ref |
| MH370365 | Unassigned | Unassigned | Unassigned | 654_0  | Clustered           | 115 VC_654_0 | 115 | 0.7303 | 1          | 0.7303 | 0 | 0 | 0 | 0.8764 Ref |
| MH370366 | Unassigned | Unassigned | Unassigned | 199_4  | Clustered           | 2 VC_199_4   | 2   | 0.0055 | 0.88232441 | 0.0048 | 0 | 0 | 0 | 1 Ref      |
| MH370367 | Unassigned | Unassigned | Unassigned | 199_9  | Clustered           | 5 VC_199_9   | 5   | 0.0226 | 0.99999452 | 0.0226 | 0 | 0 | 0 | 0.7 Ref    |
| MH370368 | Unassigned | Unassigned | Unassigned | 135_3  | Clustered           | 3 VC_135_3   | 3   | 0.0104 | 0.99060433 | 0.0103 | 0 | 0 | 0 | 1 Ref      |



|          |            |            |            |        |                     |              |     |        |            |        |   |   |   |        |     |
|----------|------------|------------|------------|--------|---------------------|--------------|-----|--------|------------|--------|---|---|---|--------|-----|
| MH370369 | Unassigned | Unassigned | Unassigned | 199_16 | Clustered           | 12 VC_199_16 | 12  | 0.064  | 1          | 0.064  | 0 | 0 | 0 | 0.9394 | Ref |
| MH370370 | Unassigned | Unassigned | Unassigned | 135_31 | Clustered           | 6 VC_135_31  | 6   | 0.0262 | 0.99999636 | 0.0262 | 0 | 0 | 0 | 1      | Ref |
| MH370371 | Unassigned | Unassigned | Unassigned | 135_3  | Clustered           | 3 VC_135_3   | 3   | 0.0104 | 0.99060433 | 0.0103 | 0 | 0 | 0 | 1      | Ref |
| MH370372 | Unassigned | Unassigned | Unassigned | 654_0  | Clustered           | 115 VC_654_0 | 115 | 0.7303 | 1          | 0.7303 | 0 | 0 | 0 | 0.8764 | Ref |
| MH370373 | Unassigned | Unassigned | Unassigned | 654_0  | Clustered           | 115 VC_654_0 | 115 | 0.7303 | 1          | 0.7303 | 0 | 0 | 0 | 0.8764 | Ref |
| MH370374 | Unassigned | Unassigned | Unassigned | 654_0  | Clustered           | 115 VC_654_0 | 115 | 0.7303 | 1          | 0.7303 | 0 | 0 | 0 | 0.8764 | Ref |
| MH370375 | Unassigned | Unassigned | Unassigned | 199_29 | Clustered/Singleton | 1 VC_199_29  | 1   | 0      | 1          | 0      | 0 | 0 | 0 | 1      | Ref |
| MH370376 | Unassigned | Unassigned | Unassigned | 199_8  | Clustered           | 2 VC_199_8   | 2   | 0.0055 | 0.91325319 | 0.005  | 0 | 0 | 0 | 1      | Ref |
| MH370377 | Unassigned | Unassigned | Unassigned | 198_13 | Clustered           | 4 VC_198_13  | 4   | 0.0214 | 0.99996706 | 0.0214 | 0 | 0 | 0 | 0.6667 | Ref |
| MH370378 | Unassigned | Unassigned | Unassigned | 198_13 | Clustered           | 4 VC_198_13  | 4   | 0.0214 | 0.99996706 | 0.0214 | 0 | 0 | 0 | 0.6667 | Ref |
| MH370379 | Unassigned | Unassigned | Unassigned | 199_23 | Clustered/Singleton | 1 VC_199_23  | 1   | 0      | 1          | 0      | 0 | 0 | 0 | 1      | Ref |
| MH370380 | Unassigned | Unassigned | Unassigned | 199_9  | Clustered           | 5 VC_199_9   | 5   | 0.0226 | 0.99999452 | 0.0226 | 0 | 0 | 0 | 0.7    | Ref |
| MH370381 | Unassigned | Unassigned | Unassigned | 654_0  | Clustered           | 115 VC_654_0 | 115 | 0.7303 | 1          | 0.7303 | 0 | 0 | 0 | 0.8764 | Ref |
| MH370384 | Unassigned | Unassigned | Unassigned | 654_0  | Clustered           | 115 VC_654_0 | 115 | 0.7303 | 1          | 0.7303 | 0 | 0 | 0 | 0.8764 | Ref |
| MH370385 | Unassigned | Unassigned | Unassigned | 654_0  | Clustered           | 115 VC_654_0 | 115 | 0.7303 | 1          | 0.7303 | 0 | 0 | 0 | 0.8764 | Ref |
| MH370386 | Unassigned | Unassigned | Unassigned | 199_5  | Clustered           | 6 VC_199_5   | 6   | 0.0283 | 0.99999992 | 0.0283 | 0 | 0 | 0 | 1      | Ref |
| MH370387 | Unassigned | Unassigned | Unassigned | 30_1   | Clustered           | 53 VC_30_1   | 53  | 0.7151 | 1          | 0.7151 | 0 | 0 | 0 | 0.9325 | Ref |
| MH370477 | Unassigned | Unassigned | Unassigned | 407_0  | Clustered           | 2 VC_407_0   | 2   | 0.0209 | 0.95793174 | 0.02   | 0 | 0 | 0 | 1      | Ref |
| MH370478 | Unassigned | Unassigned | Unassigned | 77_0   | Clustered           | 37 VC_77_0   | 37  | 0.9392 | 1          | 0.9392 | 0 | 0 | 0 | 1      | Ref |
| MH371107 | Unassigned | Unassigned | Unassigned | 384_13 | Clustered           | 33 VC_384_13 | 33  | 0.1785 | 1          | 0.1785 | 0 | 0 | 0 | 0.8769 | Ref |
| MH371108 | Unassigned | Unassigned | Unassigned | 881_0  | Clustered           | 7 VC_881_0   | 7   | 0.3448 | 1          | 0.3448 | 0 | 0 | 0 | 1      | Ref |
| MH371109 | Unassigned | Unassigned | Unassigned | 881_0  | Clustered           | 7 VC_881_0   | 7   | 0.3448 | 1          | 0.3448 | 0 | 0 | 0 | 1      | Ref |
| MH371110 | Unassigned | Unassigned | Unassigned | 335_50 | Clustered           | 2 VC_335_50  | 2   | 0.0043 | 0.95751115 | 0.0041 | 0 | 0 | 0 | 1      | Ref |
| MH371111 | Unassigned | Unassigned | Unassigned | 1407_0 | Clustered           | 78 VC_1407_0 | 78  | 0.9731 | 1          | 0.9731 | 0 | 0 | 0 | 1      | Ref |
| MH371112 | Unassigned | Unassigned | Unassigned | 571_6  | Clustered           | 22 VC_571_6  | 22  | 0.1207 | 1          | 0.1207 | 0 | 0 | 0 | 0.8095 | Ref |
| MH371113 | Unassigned | Unassigned | Unassigned | 243_0  | Clustered           | 72 VC_243_0  | 72  | 0.8089 | 1          | 0.8089 | 0 | 0 | 0 | 1      | Ref |
| MH371114 | Unassigned | Unassigned | Unassigned | 384_16 | Clustered           | 42 VC_384_16 | 42  | 0.134  | 1          | 0.134  | 0 | 0 | 0 | 0.7282 | Ref |
| MH371115 | Unassigned | Unassigned | Unassigned | 538_40 | Clustered           | 4 VC_538_40  | 4   | 0.0395 | 0.99998776 | 0.0394 | 0 | 0 | 0 | 1      | Ref |
| MH371116 | Unassigned | Unassigned | Unassigned | 783_0  | Clustered           | 67 VC_783_0  | 67  | 0.8945 | 1          | 0.8945 | 0 | 0 | 0 | 1      | Ref |
| MH371117 | Unassigned | Unassigned | Unassigned | 384_16 | Clustered           | 42 VC_384_16 | 42  | 0.134  | 1          | 0.134  | 0 | 0 | 0 | 0.7282 | Ref |
| MH371118 | Unassigned | Unassigned | Unassigned | 1407_0 | Clustered           | 78 VC_1407_0 | 78  | 0.9731 | 1          | 0.9731 | 0 | 0 | 0 | 1      | Ref |
| MH371119 | Unassigned | Unassigned | Unassigned | 783_0  | Clustered           | 67 VC_783_0  | 67  | 0.8945 | 1          | 0.8945 | 0 | 0 | 0 | 1      | Ref |
| MH371120 | Unassigned | Unassigned | Unassigned | 538_39 | Clustered/Singleton | 1 VC_538_39  | 1   | 0      | 1          | 0      | 0 | 0 | 0 | 1      | Ref |
| MH371121 | Unassigned | Unassigned | Unassigned | 532_0  | Clustered           | 75 VC_532_0  | 75  | 0.9393 | 1          | 0.9393 | 0 | 0 | 0 | 1      | Ref |
| MH371122 | Unassigned | Unassigned | Unassigned | 232_0  | Clustered           | 32 VC_232_0  | 32  | 0.8471 | 1          | 0.8471 | 0 | 0 | 0 | 0.996  | Ref |
| MH371123 | Unassigned | Unassigned | Unassigned | 538_23 | Clustered           | 2 VC_538_33  | 2   | 0.0087 | 0.95761754 | 0.0083 | 0 | 0 | 0 | 1      | Ref |
| MH371124 | Unassigned | Unassigned | Unassigned | 1407_0 | Clustered           | 78 VC_1407_0 | 78  | 0.9731 | 1          | 0.9731 | 0 | 0 | 0 | 1      | Ref |
| MH371125 | Unassigned | Unassigned | Unassigned | 384_16 | Clustered           | 42 VC_384_16 | 42  | 0.134  | 1          | 0.134  | 0 | 0 | 0 | 0.7282 | Ref |
| MH375074 | Unassigned | Unassigned | Unassigned | 711_0  | Clustered           | 48 VC_711_0  | 48  | 0.8217 | 1          | 0.8217 | 0 | 0 | 0 | 1      | Ref |
| MH375593 | Unassigned | Unassigned | Unassigned | 260_0  | Clustered           | 46 VC_260_0  | 46  | 0.5137 | 1          | 0.5137 | 0 | 0 | 0 | 1      | Ref |
| MH375594 | Unassigned | Unassigned | Unassigned | 258_0  | Clustered           | 121 VC_258_0 | 121 | 0.7359 | 1          | 0.7359 | 0 | 0 | 0 | 0.9999 | Ref |
| MH375595 | Unassigned | Unassigned | Unassigned | 258_0  | Clustered           | 121 VC_258_0 | 121 | 0.7359 | 1          | 0.7359 | 0 | 0 | 0 | 0.9999 | Ref |
| MH375596 | Unassigned | Unassigned | Unassigned | 258_0  | Clustered           | 121 VC_258_0 | 121 | 0.7359 | 1          | 0.7359 | 0 | 0 | 0 | 0.9999 | Ref |
| MH375597 | Unassigned | Unassigned | Unassigned | 258_0  | Clustered           | 121 VC_258_0 | 121 | 0.7359 | 1          | 0.7359 | 0 | 0 | 0 | 0.9999 | Ref |
| MH375598 | Unassigned | Unassigned | Unassigned | 258_0  | Clustered           | 121 VC_258_0 | 121 | 0.7359 | 1          | 0.7359 | 0 | 0 | 0 | 0.9999 | Ref |
| MH375599 | Unassigned | Unassigned | Unassigned | 258_0  | Clustered           | 121 VC_258_0 | 121 | 0.7359 | 1          | 0.7359 | 0 | 0 | 0 | 0.9999 | Ref |
| MH375600 | Unassigned | Unassigned | Unassigned | 258_0  | Clustered           | 121 VC_258_0 | 121 | 0.7359 | 1          | 0.7359 | 0 | 0 | 0 | 0.9999 | Ref |
| MH375644 | Unassigned | Unassigned | Unassigned | 138_0  | Clustered           | 2 VC_138_0   | 2   | 0.0413 | 0.95740923 | 0.0395 | 0 | 0 | 0 | 1      | Ref |
| MH378441 | Unassigned | Unassigned | Unassigned | 310_0  | Clustered           | 155 VC_310_0 | 155 | 0.9979 | 1          | 0.9979 | 0 | 0 | 0 | 1      | Ref |
| MH378442 | Unassigned | Unassigned | Unassigned | 310_0  | Clustered           | 155 VC_310_0 | 155 | 0.9979 | 1          | 0.9979 | 0 | 0 | 0 | 1      | Ref |
| MH378443 | Unassigned | Unassigned | Unassigned | 310_0  | Clustered           | 155 VC_310_0 | 155 | 0.9979 | 1          | 0.9979 | 0 | 0 | 0 | 1      | Ref |
| MH382198 | Unassigned | Unassigned | Unassigned | 405_0  | Clustered           | 126 VC_405_0 | 126 | 0.9614 | 1          | 0.9614 | 0 | 0 | 0 | 1      | Ref |
| MH383160 | Unassigned | Unassigned | Unassigned | 170_11 | Clustered           | 10 VC_170_11 | 10  | 0.1502 | 0.99999797 | 0.1502 | 0 | 0 | 0 | 0.9111 | Ref |
| MH384259 | Unassigned | Unassigned | Unassigned | 10_0   | Clustered           | 25 VC_10_0   | 25  | 0.3437 | 1          | 0.3437 | 0 | 0 | 0 | 0.9733 | Ref |
| MH384260 | Unassigned | Unassigned | Unassigned | 7_0    | Clustered           | 28 VC_7_0    | 28  | 0.389  | 1          | 0.389  | 0 | 0 | 0 | 0.9947 | Ref |
| MH384261 | Unassigned | Unassigned | Unassigned | 8_0    | Clustered           | 58 VC_8_0    | 58  | 0.8285 | 1          | 0.8285 | 0 | 0 | 0 | 0.9946 | Ref |
| MH389777 | Unassigned | Unassigned | Unassigned | 68_4   | Clustered           | 4 VC_68_4    | 4   | 0.0431 | 0.90943035 | 0.0392 | 0 | 0 | 0 | 1      | Ref |
| MH393889 | Unassigned | Unassigned | Unassigned | 930_0  | Clustered           | 4 VC_930_0   | 4   | 0.2568 | 0.99997246 | 0.2568 | 0 | 0 | 0 | 1      | Ref |
| MH399771 | Unassigned | Unassigned | Unassigned | 538_42 | Clustered/Singleton | 1 VC_538_42  | 1   | 0      | 1          | 0      | 0 | 0 | 0 | 1      | Ref |
| MH399772 | Unassigned | Unassigned | Unassigned | 566_0  | Clustered           | 2 VC_566_0   | 2   | 0.0136 | 0.63748598 | 0.0087 | 0 | 0 | 0 | 1      | Ref |
| MH399773 | Unassigned | Unassigned | Unassigned | 384_16 | Clustered           | 42 VC_384_16 | 42  | 0.134  | 1          | 0.134  | 0 | 0 | 0 | 0.7282 | Ref |
| MH399774 | Unassigned | Unassigned | Unassigned | 571_0  | Clustered           | 16 VC_571_0  | 16  | 0.091  | 1          | 0.091  | 0 | 0 | 0 | 0.6667 | Ref |
| MH399775 | Unassigned | Unassigned | Unassigned | 384_15 | Clustered           | 44 VC_384_15 | 44  | 0.139  | 1          | 0.139  | 0 | 0 | 0 | 0.7474 | Ref |
| MH399776 | Unassigned | Unassigned | Unassigned | 532_0  | Clustered           | 75 VC_532_0  | 75  | 0.9393 | 1          | 0.9393 | 0 | 0 | 0 | 1      | Ref |
| MH399777 | Unassigned | Unassigned | Unassigned | 535_1  | Clustered           | 108 VC_535_1 | 108 | 0.8479 | 1          | 0.8479 | 0 | 0 | 0 | 0.9955 | Ref |
| MH399778 | Unassigned | Unassigned | Unassigned | 571_0  | Clustered           | 16 VC_571_0  | 16  | 0.091  | 1          | 0.091  | 0 | 0 | 0 | 0.6667 | Ref |
| MH399779 | Unassigned | Unassigned | Unassigned | 881_1  | Clustered           | 13 VC_881_1  | 13  | 0.5859 | 1          | 0.5859 | 0 | 0 | 0 | 1      | Ref |
| MH399780 | Unassigned | Unassigned | Unassigned | 384_16 | Clustered           | 42 VC_384_16 | 42  | 0.134  | 1          | 0.134  | 0 | 0 | 0 | 0.7282 | Ref |
| MH399781 | Unassigned | Unassigned | Unassigned | 989_0  | Clustered           | 13 VC_989_0  | 13  | 0.8622 | 1          | 0.8622 | 0 | 0 | 0 | 1      | Ref |
| MH399782 | Unassigned | Unassigned | Unassigned | 335_56 | Clustered           | 7 VC_335_56  | 7   | 0.0242 | 1          | 0.0242 | 0 | 0 | 0 | 0.9048 | Ref |
| MH399783 | Unassigned | Unassigned | Unassigned | 1407_0 | Clustered           | 78 VC_1407_0 | 78  | 0.9731 | 1          | 0.9731 | 0 | 0 | 0 | 1      | Ref |
| MH399784 | Unassigned | Unassigned | Unassigned | 538_45 | Clustered           | 7 VC_538_45  | 7   | 0.0632 | 1          | 0.0632 | 0 | 0 | 0 | 0.8095 | Ref |
| MH399785 | Unassigned | Unassigned | Unassigned | 535_1  | Clustered           | 108 VC_535_1 | 108 | 0.8479 | 1          | 0.8479 | 0 | 0 | 0 | 0.9955 | Ref |
| MH399786 | Unassigned | Unassigned | Unassigned | 384_15 | Clustered           | 44 VC_384_15 | 44  | 0.139  | 1          | 0.139  | 0 | 0 | 0 | 0.7474 | Ref |
| MH399787 | Unassigned | Unassigned | Unassigned | 539_0  | Clustered           | 37 VC_539_0  | 37  | 0.911  | 1          | 0.911  | 0 | 0 | 0 | 1      | Ref |
| MH399788 | Unassigned | Unassigned | Unassigned | 585_0  | Clustered           | 20 VC_585_0  | 20  | 0.8376 | 1          | 0.8376 | 0 | 0 | 0 | 1      | Ref |
| MH399789 | Unassigned | Unassigned | Unassigned | 1204_0 | Clustered           | 25 VC_1204_0 | 25  | 0.7382 | 1          | 0.7382 | 0 | 0 | 0 | 1      | Ref |
| MH400309 | Unassigned | Unassigned | Unassigned | 465_0  | Clustered           | 80 VC_465_0  | 80  | 0.9988 | 1          | 0.9988 | 0 | 0 | 0 | 1      | Ref |
| MH401414 | Unassigned | Unassigned | Unassigned | 7_0    | Clustered           | 28 VC_7_0    | 28  | 0.389  | 1          | 0.389  | 0 | 0 | 0 | 0.9947 | Ref |
| MH401415 | Unassigned | Unassigned | Unassigned | 7_0    | Clustered           | 28 VC_7_0    | 28  | 0.389  | 1          | 0.389  | 0 | 0 | 0 | 0.9947 | Ref |
| MH401416 | Unassigned | Unassigned | Unassigned | 10_0   | Clustered           | 25 VC_10_0   | 25  | 0.3437 | 1          | 0.3437 | 0 | 0 | 0 | 0.9733 | Ref |



|          |            |            |            |        |                     |              |     |        |            |        |   |   |   |            |
|----------|------------|------------|------------|--------|---------------------|--------------|-----|--------|------------|--------|---|---|---|------------|
| MH412654 | Unassigned | Unassigned | Unassigned | 446_1  | Clustered/Singleton | 1 VC_446_1   | 1   | 0      | 1          | 0      | 0 | 0 | 0 | 1 Ref      |
| MH422554 | Unassigned | Unassigned | Unassigned | 254_0  | Clustered           | 14 VC_254_0  | 14  | 0.9118 | 1          | 0.9118 | 0 | 0 | 0 | 0.967 Ref  |
| MH424443 | Unassigned | Unassigned | Unassigned | 654_0  | Clustered           | 115 VC_654_0 | 115 | 0.7303 | 1          | 0.7303 | 0 | 0 | 0 | 0.8764 Ref |
| MH424444 | Unassigned | Unassigned | Unassigned | 560_0  | Clustered           | 15 VC_560_0  | 15  | 0.2846 | 1          | 0.2846 | 0 | 0 | 0 | 1 Ref      |
| MH424445 | Unassigned | Unassigned | Unassigned | 654_0  | Clustered           | 115 VC_654_0 | 115 | 0.7303 | 1          | 0.7303 | 0 | 0 | 0 | 0.8764 Ref |
| MH424446 | Unassigned | Unassigned | Unassigned | 475_0  | Clustered           | 96 VC_475_0  | 96  | 0.9303 | 1          | 0.9303 | 0 | 0 | 0 | 0.9575 Ref |
| MH426724 | Unassigned | Unassigned | Unassigned | 994_3  | Clustered           | 3 VC_994_3   | 3   | 0.0236 | 0.75215638 | 0.0178 | 0 | 0 | 0 | 1 Ref      |
| MH426725 | Unassigned | Unassigned | Unassigned | 339_0  | Clustered           | 11 VC_339_0  | 11  | 0.4647 | 1          | 0.4647 | 0 | 0 | 0 | 1 Ref      |
| MH426726 | Unassigned | Unassigned | Unassigned | 372_0  | Clustered           | 7 VC_372_0   | 7   | 0.3691 | 1          | 0.3691 | 0 | 0 | 0 | 1 Ref      |
| MH427377 | Unassigned | Unassigned | Unassigned | 135_22 | Clustered           | 13 VC_135_22 | 13  | 0.0795 | 1          | 0.0795 | 0 | 0 | 0 | 0.8205 Ref |
| MH431931 | Unassigned | Unassigned | Unassigned | 725_0  | Clustered           | 47 VC_725_0  | 47  | 0.8649 | 1          | 0.8649 | 0 | 0 | 0 | 1 Ref      |
| MH431932 | Unassigned | Unassigned | Unassigned | 725_0  | Clustered           | 47 VC_725_0  | 47  | 0.8649 | 1          | 0.8649 | 0 | 0 | 0 | 1 Ref      |
| MH431933 | Unassigned | Unassigned | Unassigned | 725_0  | Clustered           | 47 VC_725_0  | 47  | 0.8649 | 1          | 0.8649 | 0 | 0 | 0 | 1 Ref      |
| MH431934 | Unassigned | Unassigned | Unassigned | 725_0  | Clustered           | 47 VC_725_0  | 47  | 0.8649 | 1          | 0.8649 | 0 | 0 | 0 | 1 Ref      |
| MH431935 | Unassigned | Unassigned | Unassigned | 725_0  | Clustered           | 47 VC_725_0  | 47  | 0.8649 | 1          | 0.8649 | 0 | 0 | 0 | 1 Ref      |
| MH431936 | Unassigned | Unassigned | Unassigned | 725_0  | Clustered           | 47 VC_725_0  | 47  | 0.8649 | 1          | 0.8649 | 0 | 0 | 0 | 1 Ref      |
| MH431937 | Unassigned | Unassigned | Unassigned | 725_0  | Clustered           | 47 VC_725_0  | 47  | 0.8649 | 1          | 0.8649 | 0 | 0 | 0 | 1 Ref      |
| MH431938 | Unassigned | Unassigned | Unassigned | 1197_0 | Clustered           | 8 VC_1197_0  | 8   | 0.8167 | 1          | 0.8167 | 0 | 0 | 0 | 1 Ref      |
| MH443100 | Unassigned | Unassigned | Unassigned | 34_0   | Clustered/Singleton | 1 VC_34_0    | 1   | 0      | 1          | 0      | 0 | 0 | 0 | 1 Ref      |
| MH444512 | Unassigned | Unassigned | Unassigned | 875_0  | Clustered           | 2 VC_875_0   | 2   | 0.3804 | 0.94412959 | 0.3591 | 0 | 0 | 0 | 1 Ref      |
| MH445380 | Unassigned | Unassigned | Unassigned | 254_0  | Clustered           | 14 VC_254_0  | 14  | 0.9118 | 1          | 0.9118 | 0 | 0 | 0 | 0.967 Ref  |
| MH445381 | Unassigned | Unassigned | Unassigned | 254_0  | Clustered           | 14 VC_254_0  | 14  | 0.9118 | 1          | 0.9118 | 0 | 0 | 0 | 0.967 Ref  |
| MH445453 | Unassigned | Unassigned | Unassigned | 972_0  | Clustered           | 99 VC_972_0  | 99  | 0.9113 | 1          | 0.9113 | 0 | 0 | 0 | 0.9928 Ref |
| MH447526 | Unassigned | Unassigned | Unassigned | 1417_0 | Clustered           | 3 VC_1417_0  | 3   | 0.9824 | 0.9595722  | 0.9427 | 0 | 0 | 0 | 1 Ref      |
| MH450113 | Unassigned | Unassigned | Unassigned | 335_23 | Clustered           | 17 VC_335_23 | 17  | 0.0714 | 1          | 0.0714 | 0 | 0 | 0 | 0.6397 Ref |
| MH450114 | Unassigned | Unassigned | Unassigned | 1208_0 | Clustered           | 6 VC_1208_0  | 6   | 0.8634 | 0.99999946 | 0.8634 | 0 | 0 | 0 | 1 Ref      |
| MH450115 | Unassigned | Unassigned | Unassigned | 1204_0 | Clustered           | 25 VC_1204_0 | 25  | 0.7382 | 1          | 0.7382 | 0 | 0 | 0 | 1 Ref      |
| MH450116 | Unassigned | Unassigned | Unassigned | 384_16 | Clustered           | 42 VC_384_16 | 42  | 0.134  | 1          | 0.134  | 0 | 0 | 0 | 0.7282 Ref |
| MH450117 | Unassigned | Unassigned | Unassigned | 1200_0 | Clustered           | 73 VC_1200_0 | 73  | 0.9825 | 1          | 0.9825 | 0 | 0 | 0 | 1 Ref      |
| MH450118 | Unassigned | Unassigned | Unassigned | 1200_0 | Clustered           | 73 VC_1200_0 | 73  | 0.9825 | 1          | 0.9825 | 0 | 0 | 0 | 1 Ref      |
| MH450119 | Unassigned | Unassigned | Unassigned | 532_0  | Clustered           | 75 VC_532_0  | 75  | 0.9393 | 1          | 0.9393 | 0 | 0 | 0 | 1 Ref      |
| MH450120 | Unassigned | Unassigned | Unassigned | 825_0  | Clustered           | 17 VC_825_0  | 17  | 0.8364 | 1          | 0.8364 | 0 | 0 | 0 | 1 Ref      |
| MH450121 | Unassigned | Unassigned | Unassigned | 1200_0 | Clustered           | 73 VC_1200_0 | 73  | 0.9825 | 1          | 0.9825 | 0 | 0 | 0 | 1 Ref      |
| MH450122 | Unassigned | Unassigned | Unassigned | 384_16 | Clustered           | 42 VC_384_16 | 42  | 0.134  | 1          | 0.134  | 0 | 0 | 0 | 0.7282 Ref |
| MH450124 | Unassigned | Unassigned | Unassigned | 532_0  | Clustered           | 75 VC_532_0  | 75  | 0.9393 | 1          | 0.9393 | 0 | 0 | 0 | 1 Ref      |
| MH450125 | Unassigned | Unassigned | Unassigned | 1204_0 | Clustered           | 25 VC_1204_0 | 25  | 0.7382 | 1          | 0.7382 | 0 | 0 | 0 | 1 Ref      |
| MH450126 | Unassigned | Unassigned | Unassigned | 532_0  | Clustered           | 75 VC_532_0  | 75  | 0.9393 | 1          | 0.9393 | 0 | 0 | 0 | 1 Ref      |
| MH450127 | Unassigned | Unassigned | Unassigned | 783_0  | Clustered           | 67 VC_783_0  | 67  | 0.8945 | 1          | 0.8945 | 0 | 0 | 0 | 1 Ref      |
| MH450128 | Unassigned | Unassigned | Unassigned | 532_0  | Clustered           | 75 VC_532_0  | 75  | 0.9393 | 1          | 0.9393 | 0 | 0 | 0 | 1 Ref      |
| MH450129 | Unassigned | Unassigned | Unassigned | 1136_0 | Clustered           | 40 VC_1136_0 | 40  | 0.8746 | 1          | 0.8746 | 0 | 0 | 0 | 1 Ref      |
| MH450130 | Unassigned | Unassigned | Unassigned | 335_23 | Clustered           | 17 VC_335_23 | 17  | 0.0714 | 1          | 0.0714 | 0 | 0 | 0 | 0.6397 Ref |
| MH450131 | Unassigned | Unassigned | Unassigned | 1200_0 | Clustered           | 73 VC_1200_0 | 73  | 0.9825 | 1          | 0.9825 | 0 | 0 | 0 | 1 Ref      |
| MH450132 | Unassigned | Unassigned | Unassigned | 952_0  | Clustered           | 39 VC_952_0  | 39  | 0.9064 | 1          | 0.9064 | 0 | 0 | 0 | 1 Ref      |
| MH450133 | Unassigned | Unassigned | Unassigned | 335_61 | Clustered           | 8 VC_335_61  | 8   | 0.0394 | 1          | 0.0394 | 0 | 0 | 0 | 0.7857 Ref |
| MH454076 | Unassigned | Unassigned | Unassigned | 1197_0 | Clustered           | 8 VC_1197_0  | 8   | 0.8167 | 1          | 0.8167 | 0 | 0 | 0 | 1 Ref      |
| MH454077 | Unassigned | Unassigned | Unassigned | 725_0  | Clustered           | 47 VC_725_0  | 47  | 0.8649 | 1          | 0.8649 | 0 | 0 | 0 | 1 Ref      |
| MH454078 | Unassigned | Unassigned | Unassigned | 725_0  | Clustered           | 47 VC_725_0  | 47  | 0.8649 | 1          | 0.8649 | 0 | 0 | 0 | 1 Ref      |
| MH454079 | Unassigned | Unassigned | Unassigned | 725_0  | Clustered           | 47 VC_725_0  | 47  | 0.8649 | 1          | 0.8649 | 0 | 0 | 0 | 1 Ref      |
| MH454080 | Unassigned | Unassigned | Unassigned | 1197_0 | Clustered           | 8 VC_1197_0  | 8   | 0.8167 | 1          | 0.8167 | 0 | 0 | 0 | 1 Ref      |
| MH454082 | Unassigned | Unassigned | Unassigned | 725_0  | Clustered           | 47 VC_725_0  | 47  | 0.8649 | 1          | 0.8649 | 0 | 0 | 0 | 1 Ref      |
| MH454083 | Unassigned | Unassigned | Unassigned | 725_0  | Clustered           | 47 VC_725_0  | 47  | 0.8649 | 1          | 0.8649 | 0 | 0 | 0 | 1 Ref      |
| MH454084 | Unassigned | Unassigned | Unassigned | 725_0  | Clustered           | 47 VC_725_0  | 47  | 0.8649 | 1          | 0.8649 | 0 | 0 | 0 | 1 Ref      |
| MH460459 | Unassigned | Unassigned | Unassigned | 406_0  | Clustered           | 7 VC_406_0   | 7   | 0.176  | 1          | 0.176  | 0 | 0 | 0 | 1 Ref      |
| MH460460 | Unassigned | Unassigned | Unassigned | 68_4   | Clustered           | 4 VC_68_4    | 4   | 0.0431 | 0.90943035 | 0.0392 | 0 | 0 | 0 | 1 Ref      |
| MH460461 | Unassigned | Unassigned | Unassigned | 68_4   | Clustered           | 4 VC_68_4    | 4   | 0.0431 | 0.90943035 | 0.0392 | 0 | 0 | 0 | 1 Ref      |
| MH460462 | Unassigned | Unassigned | Unassigned | 68_4   | Clustered           | 4 VC_68_4    | 4   | 0.0431 | 0.90943035 | 0.0392 | 0 | 0 | 0 | 1 Ref      |
| MH460463 | Unassigned | Unassigned | Unassigned | 68_3   | Clustered           | 20 VC_68_3   | 20  | 0.3537 | 1          | 0.3537 | 0 | 0 | 0 | 1 Ref      |
| MH460824 | Unassigned | Unassigned | Unassigned | 1197_0 | Clustered           | 8 VC_1197_0  | 8   | 0.8167 | 1          | 0.8167 | 0 | 0 | 0 | 1 Ref      |
| MH460825 | Unassigned | Unassigned | Unassigned | 1197_0 | Clustered           | 8 VC_1197_0  | 8   | 0.8167 | 1          | 0.8167 | 0 | 0 | 0 | 1 Ref      |
| MH460826 | Unassigned | Unassigned | Unassigned | 1197_0 | Clustered           | 8 VC_1197_0  | 8   | 0.8167 | 1          | 0.8167 | 0 | 0 | 0 | 1 Ref      |
| MH460827 | Unassigned | Unassigned | Unassigned | 1197_0 | Clustered           | 8 VC_1197_0  | 8   | 0.8167 | 1          | 0.8167 | 0 | 0 | 0 | 1 Ref      |
| MH460829 | Unassigned | Unassigned | Unassigned | 510_1  | Clustered           | 20 VC_510_1  | 20  | 0.4172 | 1          | 0.4172 | 0 | 0 | 0 | 1 Ref      |
| MH464253 | Unassigned | Unassigned | Unassigned | 465_0  | Clustered           | 80 VC_465_0  | 80  | 0.9988 | 1          | 0.9988 | 0 | 0 | 0 | 1 Ref      |
| MH479909 | Unassigned | Unassigned | Unassigned | 535_1  | Clustered           | 108 VC_535_1 | 108 | 0.8479 | 1          | 0.8479 | 0 | 0 | 0 | 0.9955 Ref |
| MH479910 | Unassigned | Unassigned | Unassigned | 1219_0 | Clustered           | 24 VC_1219_0 | 24  | 0.9519 | 1          | 0.9519 | 0 | 0 | 0 | 1 Ref      |
| MH479911 | Unassigned | Unassigned | Unassigned | 535_1  | Clustered           | 108 VC_535_1 | 108 | 0.8479 | 1          | 0.8479 | 0 | 0 | 0 | 0.9955 Ref |
| MH479912 | Unassigned | Unassigned | Unassigned | 543_0  | Clustered           | 25 VC_543_0  | 25  | 0.4584 | 1          | 0.4584 | 0 | 0 | 0 | 1 Ref      |
| MH479913 | Unassigned | Unassigned | Unassigned | 1225_0 | Clustered           | 6 VC_1225_0  | 6   | 0.9947 | 0.99996974 | 0.9947 | 0 | 0 | 0 | 1 Ref      |
| MH479914 | Unassigned | Unassigned | Unassigned | 384_16 | Clustered           | 42 VC_384_16 | 42  | 0.134  | 1          | 0.134  | 0 | 0 | 0 | 0.7282 Ref |
| MH479915 | Unassigned | Unassigned | Unassigned | 1218_0 | Clustered           | 14 VC_1218_0 | 14  | 0.7811 | 1          | 0.7811 | 0 | 0 | 0 | 0.989 Ref  |
| MH479916 | Unassigned | Unassigned | Unassigned | 384_13 | Clustered           | 33 VC_384_13 | 33  | 0.1785 | 1          | 0.1785 | 0 | 0 | 0 | 0.8769 Ref |
| MH479917 | Unassigned | Unassigned | Unassigned | 1219_0 | Clustered           | 24 VC_1219_0 | 24  | 0.9519 | 1          | 0.9519 | 0 | 0 | 0 | 1 Ref      |
| MH479918 | Unassigned | Unassigned | Unassigned | 384_13 | Clustered           | 33 VC_384_13 | 33  | 0.1785 | 1          | 0.1785 | 0 | 0 | 0 | 0.8769 Ref |
| MH479919 | Unassigned | Unassigned | Unassigned | 335_61 | Clustered           | 8 VC_335_61  | 8   | 0.0394 | 1          | 0.0394 | 0 | 0 | 0 | 0.7857 Ref |
| MH479920 | Unassigned | Unassigned | Unassigned | 783_0  | Clustered           | 67 VC_783_0  | 67  | 0.8945 | 1          | 0.8945 | 0 | 0 | 0 | 1 Ref      |
| MH479921 | Unassigned | Unassigned | Unassigned | 384_16 | Clustered           | 42 VC_384_16 | 42  | 0.134  | 1          | 0.134  | 0 | 0 | 0 | 0.7282 Ref |
| MH479923 | Unassigned | Unassigned | Unassigned | 897_0  | Clustered           | 5 VC_897_0   | 5   | 0.4183 | 0.99999997 | 0.4183 | 0 | 0 | 0 | 1 Ref      |
| MH479924 | Unassigned | Unassigned | Unassigned | 1136_0 | Clustered           | 40 VC_1136_0 | 40  | 0.8746 | 1          | 0.8746 | 0 | 0 | 0 | 1 Ref      |
| MH479925 | Unassigned | Unassigned | Unassigned | 1225_0 | Clustered           | 6 VC_1225_0  | 6   | 0.9947 | 0.99996974 | 0.9947 | 0 | 0 | 0 | 1 Ref      |
| MH479926 | Unassigned | Unassigned | Unassigned | 1204_0 | Clustered           | 25 VC_1204_0 | 25  | 0.7382 | 1          | 0.7382 | 0 | 0 | 0 | 1 Ref      |
| MH479927 | Unassigned | Unassigned | Unassigned | 543_0  | Clustered           | 25 VC_543_0  | 25  | 0.4584 | 1          | 0.4584 | 0 | 0 | 0 | 1 Ref      |



|          |            |            |            |        |                     |              |     |        |            |        |   |   |   |            |
|----------|------------|------------|------------|--------|---------------------|--------------|-----|--------|------------|--------|---|---|---|------------|
| MH487649 | Unassigned | Unassigned | Unassigned | 195_1  | Clustered           | 7 VC_195_1   | 7   | 0.1409 | 1          | 0.1409 | 0 | 0 | 0 | 1 Ref      |
| MH491167 | Unassigned | Unassigned | Unassigned | 465_0  | Clustered           | 80 VC_465_0  | 80  | 0.9988 | 1          | 0.9988 | 0 | 0 | 0 | 1 Ref      |
| MH491968 | Unassigned | Unassigned | Unassigned | 603_0  | Clustered           | 28 VC_603_0  | 28  | 0.7692 | 1          | 0.7692 | 0 | 0 | 0 | 1 Ref      |
| MH491969 | Unassigned | Unassigned | Unassigned | 794_11 | Clustered           | 6 VC_794_11  | 6   | 0.0305 | 0.83830784 | 0.0256 | 0 | 0 | 0 | 0.8 Ref    |
| MH494197 | Unassigned | Unassigned | Unassigned | 170_2  | Clustered/Singleton | 1 VC_170_2   | 1   | 0      | 1          | 0      | 0 | 0 | 0 | 1 Ref      |
| MH509443 | Unassigned | Unassigned | Unassigned | 535_1  | Clustered           | 108 VC_535_1 | 108 | 0.8479 | 1          | 0.8479 | 0 | 0 | 0 | 0.9955 Ref |
| MH509444 | Unassigned | Unassigned | Unassigned | 243_0  | Clustered           | 72 VC_243_0  | 72  | 0.8089 | 1          | 0.8089 | 0 | 0 | 0 | 1 Ref      |
| MH509445 | Unassigned | Unassigned | Unassigned | 587_0  | Clustered           | 8 VC_587_0   | 8   | 0.4907 | 1          | 0.4907 | 0 | 0 | 0 | 1 Ref      |
| MH509446 | Unassigned | Unassigned | Unassigned | 989_0  | Clustered           | 13 VC_989_0  | 13  | 0.8622 | 1          | 0.8622 | 0 | 0 | 0 | 1 Ref      |
| MH509447 | Unassigned | Unassigned | Unassigned | 1287_0 | Clustered           | 44 VC_1287_0 | 44  | 1      | 1          | 1      | 0 | 0 | 0 | 1 Ref      |
| MH512890 | Unassigned | Unassigned | Unassigned | 674_0  | Clustered           | 2 VC_674_0   | 2   | 0.0109 | 0.95704495 | 0.0105 | 0 | 0 | 0 | 1 Ref      |
| MH513970 | Unassigned | Unassigned | Unassigned | 385_0  | Clustered           | 24 VC_385_0  | 24  | 0.5516 | 1          | 0.5516 | 0 | 0 | 0 | 1 Ref      |
| MH513971 | Unassigned | Unassigned | Unassigned | 335_0  | Clustered           | 2 VC_335_0   | 2   | 0.0041 | 0.95574439 | 0.0039 | 0 | 0 | 0 | 1 Ref      |
| MH513972 | Unassigned | Unassigned | Unassigned | 571_2  | Clustered           | 17 VC_571_2  | 17  | 0.0965 | 1          | 0.0965 | 0 | 0 | 0 | 0.9779 Ref |
| MH513973 | Unassigned | Unassigned | Unassigned | 384_13 | Clustered           | 33 VC_384_13 | 33  | 0.1785 | 1          | 0.1785 | 0 | 0 | 0 | 0.8769 Ref |
| MH513974 | Unassigned | Unassigned | Unassigned | 231_0  | Clustered           | 19 VC_231_0  | 19  | 0.9378 | 1          | 0.9378 | 0 | 0 | 0 | 1 Ref      |
| MH513975 | Unassigned | Unassigned | Unassigned | 532_0  | Clustered           | 75 VC_532_0  | 75  | 0.9393 | 1          | 0.9393 | 0 | 0 | 0 | 1 Ref      |
| MH513976 | Unassigned | Unassigned | Unassigned | 527_0  | Clustered           | 37 VC_527_0  | 37  | 0.9679 | 1          | 0.9679 | 0 | 0 | 0 | 1 Ref      |
| MH513977 | Unassigned | Unassigned | Unassigned | 243_0  | Clustered           | 72 VC_243_0  | 72  | 0.8089 | 1          | 0.8089 | 0 | 0 | 0 | 1 Ref      |
| MH513978 | Unassigned | Unassigned | Unassigned | 571_2  | Clustered           | 17 VC_571_2  | 17  | 0.0965 | 1          | 0.0965 | 0 | 0 | 0 | 0.9779 Ref |
| MH513979 | Unassigned | Unassigned | Unassigned | 701_0  | Clustered           | 16 VC_701_0  | 16  | 0.2957 | 1          | 0.2957 | 0 | 0 | 0 | 0.9167 Ref |
| MH513980 | Unassigned | Unassigned | Unassigned | 384_11 | Clustered           | 31 VC_384_11 | 31  | 0.0926 | 1          | 0.0926 | 0 | 0 | 0 | 0.7011 Ref |
| MH513981 | Unassigned | Unassigned | Unassigned | 1296_0 | Clustered           | 82 VC_1296_0 | 82  | 0.7938 | 1          | 0.7938 | 0 | 0 | 0 | 1 Ref      |
| MH513982 | Unassigned | Unassigned | Unassigned | 1203_0 | Clustered           | 28 VC_1203_0 | 28  | 0.4905 | 1          | 0.4905 | 0 | 0 | 0 | 1 Ref      |
| MH513983 | Unassigned | Unassigned | Unassigned | 571_6  | Clustered           | 22 VC_571_6  | 22  | 0.1207 | 1          | 0.1207 | 0 | 0 | 0 | 0.8095 Ref |
| MH513984 | Unassigned | Unassigned | Unassigned | 229_0  | Clustered           | 5 VC_229_0   | 5   | 0.0566 | 0.99999997 | 0.0566 | 0 | 0 | 0 | 1 Ref      |
| MH513985 | Unassigned | Unassigned | Unassigned | 222_1  | Clustered           | 19 VC_222_1  | 19  | 0.4166 | 1          | 0.4166 | 0 | 0 | 0 | 1 Ref      |
| MH523359 | Unassigned | Unassigned | Unassigned | 135_40 | Clustered/Singleton | 1 VC_135_40  | 1   | 0      | 1          | 0      | 0 | 0 | 0 | 1 Ref      |
| MH533020 | Unassigned | Unassigned | Unassigned | 873_0  | Clustered           | 3 VC_873_0   | 3   | 0.0679 | 0.9984794  | 0.0677 | 0 | 0 | 0 | 1 Ref      |
| MH536736 | Unassigned | Unassigned | Unassigned | 81_0   | Clustered           | 41 VC_81_0   | 41  | 0.5815 | 1          | 0.5815 | 0 | 0 | 0 | 0.9805 Ref |
| MH536811 | Unassigned | Unassigned | Unassigned | 1115_4 | Clustered           | 4 VC_1115_4  | 4   | 0.0733 | 0.99956559 | 0.0732 | 0 | 0 | 0 | 1 Ref      |
| MH536812 | Unassigned | Unassigned | Unassigned | 578_2  | Clustered/Singleton | 1 VC_578_2   | 1   | 0      | 1          | 0      | 0 | 0 | 0 | 1 Ref      |
| MH536813 | Unassigned | Unassigned | Unassigned | 532_0  | Clustered           | 75 VC_532_0  | 75  | 0.9393 | 1          | 0.9393 | 0 | 0 | 0 | 1 Ref      |
| MH536814 | Unassigned | Unassigned | Unassigned | 1115_4 | Clustered           | 4 VC_1115_4  | 4   | 0.0733 | 0.99956559 | 0.0732 | 0 | 0 | 0 | 1 Ref      |
| MH536815 | Unassigned | Unassigned | Unassigned | 1416_0 | Clustered           | 10 VC_1416_0 | 10  | 1      | 1          | 1      | 0 | 0 | 0 | 1 Ref      |
| MH536816 | Unassigned | Unassigned | Unassigned | 335_28 | Clustered           | 2 VC_335_28  | 2   | 0.0044 | 0.95750955 | 0.0042 | 0 | 0 | 0 | 1 Ref      |
| MH536817 | Unassigned | Unassigned | Unassigned | 535_1  | Clustered           | 108 VC_535_1 | 108 | 0.8479 | 1          | 0.8479 | 0 | 0 | 0 | 0.9955 Ref |
| MH536818 | Unassigned | Unassigned | Unassigned | 1217_0 | Clustered           | 41 VC_1217_0 | 41  | 0.9546 | 1          | 0.9546 | 0 | 0 | 0 | 0.9976 Ref |
| MH536819 | Unassigned | Unassigned | Unassigned | 789_0  | Clustered           | 34 VC_789_0  | 34  | 0.9167 | 1          | 0.9167 | 0 | 0 | 0 | 1 Ref      |
| MH536820 | Unassigned | Unassigned | Unassigned | 571_0  | Clustered           | 16 VC_571_0  | 16  | 0.091  | 1          | 0.091  | 0 | 0 | 0 | 0.6667 Ref |
| MH536821 | Unassigned | Unassigned | Unassigned | 243_0  | Clustered           | 72 VC_243_0  | 72  | 0.8089 | 1          | 0.8089 | 0 | 0 | 0 | 1 Ref      |
| MH536822 | Unassigned | Unassigned | Unassigned | 243_0  | Clustered           | 72 VC_243_0  | 72  | 0.8089 | 1          | 0.8089 | 0 | 0 | 0 | 1 Ref      |
| MH536823 | Unassigned | Unassigned | Unassigned | 881_0  | Clustered           | 7 VC_881_0   | 7   | 0.3448 | 1          | 0.3448 | 0 | 0 | 0 | 1 Ref      |
| MH536824 | Unassigned | Unassigned | Unassigned | 789_0  | Clustered           | 34 VC_789_0  | 34  | 0.9167 | 1          | 0.9167 | 0 | 0 | 0 | 1 Ref      |
| MH536825 | Unassigned | Unassigned | Unassigned | 532_0  | Clustered           | 75 VC_532_0  | 75  | 0.9393 | 1          | 0.9393 | 0 | 0 | 0 | 1 Ref      |
| MH536827 | Unassigned | Unassigned | Unassigned | 571_7  | Clustered           | 28 VC_571_7  | 28  | 0.1651 | 1          | 0.1651 | 0 | 0 | 0 | 0.8519 Ref |
| MH536828 | Unassigned | Unassigned | Unassigned | 228_0  | Clustered           | 22 VC_228_0  | 22  | 0.7411 | 1          | 0.7411 | 0 | 0 | 0 | 1 Ref      |
| MH536829 | Unassigned | Unassigned | Unassigned | 571_6  | Clustered           | 22 VC_571_6  | 22  | 0.1207 | 1          | 0.1207 | 0 | 0 | 0 | 0.8095 Ref |
| MH538193 | Unassigned | Unassigned | Unassigned | 913_0  | Clustered           | 28 VC_913_0  | 28  | 0.6206 | 1          | 0.6206 | 0 | 0 | 0 | 0.9841 Ref |
| MH540083 | Unassigned | Unassigned | Unassigned | 352_0  | Clustered           | 31 VC_352_0  | 31  | 0.9547 | 1          | 0.9547 | 0 | 0 | 0 | 1 Ref      |
| MH542234 | Unassigned | Unassigned | Unassigned | 156_0  | Clustered           | 13 VC_156_0  | 13  | 0.2378 | 1          | 0.2378 | 0 | 0 | 0 | 0.9872 Ref |
| MH547045 | Unassigned | Unassigned | Unassigned | 45_0   | Clustered           | 38 VC_45_0   | 38  | 0.5785 | 1          | 0.5785 | 0 | 0 | 0 | 0.9659 Ref |
| MH550421 | Unassigned | Unassigned | Unassigned | 290_88 | Clustered           | 2 VC_290_88  | 2   | 0.0025 | 0.95596547 | 0.0024 | 0 | 0 | 0 | 1 Ref      |
| MH552500 | Unassigned | Unassigned | Unassigned | 691_1  | Clustered           | 5 VC_691_1   | 5   | 0.1605 | 0.99999993 | 0.1605 | 0 | 0 | 0 | 0.8 Ref    |
| MH553563 | Unassigned | Unassigned | Unassigned | 290_52 | Clustered/Singleton | 1 VC_290_52  | 1   | 0      | 1          | 0      | 0 | 0 | 0 | 1 Ref      |
| MH560358 | Unassigned | Unassigned | Unassigned | 609_0  | Clustered           | 27 VC_609_0  | 27  | 0.9943 | 1          | 0.9943 | 0 | 0 | 0 | 1 Ref      |
| MH571750 | Unassigned | Unassigned | Unassigned | 340_7  | Clustered           | 18 VC_340_7  | 18  | 0.0936 | 1          | 0.0936 | 0 | 0 | 0 | 0.7778 Ref |
| MH572269 | Unassigned | Unassigned | Unassigned | 411_0  | Clustered           | 48 VC_411_0  | 48  | 0.4808 | 1          | 0.4808 | 0 | 0 | 0 | 1 Ref      |
| MH572274 | Unassigned | Unassigned | Unassigned | 1418_0 | Clustered           | 3 VC_1418_0  | 3   | 1      | 1          | 1      | 0 | 0 | 0 | 1 Ref      |
| MH572275 | Unassigned | Unassigned | Unassigned | 1418_0 | Clustered           | 3 VC_1418_0  | 3   | 1      | 1          | 1      | 0 | 0 | 0 | 1 Ref      |
| MH572276 | Unassigned | Unassigned | Unassigned | 1418_0 | Clustered           | 3 VC_1418_0  | 3   | 1      | 1          | 1      | 0 | 0 | 0 | 1 Ref      |
| MH572277 | Unassigned | Unassigned | Unassigned | 206_0  | Clustered           | 28 VC_206_0  | 28  | 0.2427 | 0.99971175 | 0.2426 | 0 | 0 | 0 | 1 Ref      |
| MH572279 | Unassigned | Unassigned | Unassigned | 412_0  | Clustered           | 25 VC_412_0  | 25  | 0.5642 | 1          | 0.5642 | 0 | 0 | 0 | 1 Ref      |
| MH572280 | Unassigned | Unassigned | Unassigned | 206_0  | Clustered           | 28 VC_206_0  | 28  | 0.2427 | 0.99971175 | 0.2426 | 0 | 0 | 0 | 1 Ref      |
| MH572282 | Unassigned | Unassigned | Unassigned | 206_0  | Clustered           | 28 VC_206_0  | 28  | 0.2427 | 0.99971175 | 0.2426 | 0 | 0 | 0 | 1 Ref      |
| MH572283 | Unassigned | Unassigned | Unassigned | 1028_0 | Clustered           | 69 VC_1028_0 | 69  | 0.8547 | 1          | 0.8547 | 0 | 0 | 0 | 1 Ref      |
| MH572284 | Unassigned | Unassigned | Unassigned | 1028_0 | Clustered           | 69 VC_1028_0 | 69  | 0.8547 | 1          | 0.8547 | 0 | 0 | 0 | 1 Ref      |
| MH572285 | Unassigned | Unassigned | Unassigned | 1028_0 | Clustered           | 69 VC_1028_0 | 69  | 0.8547 | 1          | 0.8547 | 0 | 0 | 0 | 1 Ref      |
| MH572286 | Unassigned | Unassigned | Unassigned | 1028_0 | Clustered           | 69 VC_1028_0 | 69  | 0.8547 | 1          | 0.8547 | 0 | 0 | 0 | 1 Ref      |
| MH572287 | Unassigned | Unassigned | Unassigned | 1126_0 | Clustered           | 9 VC_1126_0  | 9   | 0.6544 | 1          | 0.6544 | 0 | 0 | 0 | 1 Ref      |
| MH572288 | Unassigned | Unassigned | Unassigned | 1126_0 | Clustered           | 9 VC_1126_0  | 9   | 0.6544 | 1          | 0.6544 | 0 | 0 | 0 | 1 Ref      |
| MH572290 | Unassigned | Unassigned | Unassigned | 206_0  | Clustered           | 28 VC_206_0  | 28  | 0.2427 | 0.99971175 | 0.2426 | 0 | 0 | 0 | 1 Ref      |
| MH572291 | Unassigned | Unassigned | Unassigned | 1028_0 | Clustered           | 69 VC_1028_0 | 69  | 0.8547 | 1          | 0.8547 | 0 | 0 | 0 | 1 Ref      |
| MH572292 | Unassigned | Unassigned | Unassigned | 1028_0 | Clustered           | 69 VC_1028_0 | 69  | 0.8547 | 1          | 0.8547 | 0 | 0 | 0 | 1 Ref      |
| MH572293 | Unassigned | Unassigned | Unassigned | 1028_0 | Clustered           | 69 VC_1028_0 | 69  | 0.8547 | 1          | 0.8547 | 0 | 0 | 0 | 1 Ref      |
| MH572294 | Unassigned | Unassigned | Unassigned | 417_0  | Clustered           | 20 VC_417_0  | 20  | 0.6581 | 1          | 0.6581 | 0 | 0 | 0 | 1 Ref      |
| MH572295 | Unassigned | Unassigned | Unassigned | 417_0  | Clustered           | 20 VC_417_0  | 20  | 0.6581 | 1          | 0.6581 | 0 | 0 | 0 | 1 Ref      |
| MH572296 | Unassigned | Unassigned | Unassigned | 417_0  | Clustered           | 20 VC_417_0  | 20  | 0.6581 | 1          | 0.6581 | 0 | 0 | 0 | 1 Ref      |
| MH572299 | Unassigned | Unassigned | Unassigned | 1031_0 | Clustered           | 2 VC_1031_0  | 2   | 0.0513 | 0.93901809 | 0.0482 | 0 | 0 | 0 | 1 Ref      |
| MH572300 | Unassigned | Unassigned | Unassigned | 412_0  | Clustered           | 25 VC_412_0  | 25  | 0.5642 | 1          | 0.5642 | 0 | 0 | 0 | 1 Ref      |
| MH572301 | Unassigned | Unassigned | Unassigned | 412_0  | Clustered           | 25 VC_412_0  | 25  | 0.5642 | 1          | 0.5642 | 0 | 0 | 0 | 1 Ref      |



[illegible]



|          |            |            |            |        |                     |              |    |        |            |        |   |   |   |       |
|----------|------------|------------|------------|--------|---------------------|--------------|----|--------|------------|--------|---|---|---|-------|
| MH572407 | Unassigned | Unassigned | Unassigned | 1419_0 | Clustered           | 8 VC_1419_0  | 8  | 0.8724 | 0.99998222 | 0.8724 | 0 | 0 | 0 | 1 Ref |
| MH572408 | Unassigned | Unassigned | Unassigned | 1419_0 | Clustered           | 8 VC_1419_0  | 8  | 0.8724 | 0.99998222 | 0.8724 | 0 | 0 | 0 | 1 Ref |
| MH572409 | Unassigned | Unassigned | Unassigned | 1121_0 | Clustered           | 6 VC_1121_0  | 6  | 0.9299 | 0.89096579 | 0.8285 | 0 | 0 | 0 | 1 Ref |
| MH572410 | Unassigned | Unassigned | Unassigned | 1119_0 | Clustered           | 48 VC_1119_0 | 48 | 0.852  | 1          | 0.852  | 0 | 0 | 0 | 1 Ref |
| MH572411 | Unassigned | Unassigned | Unassigned | 1119_0 | Clustered           | 48 VC_1119_0 | 48 | 0.852  | 1          | 0.852  | 0 | 0 | 0 | 1 Ref |
| MH572412 | Unassigned | Unassigned | Unassigned | 1119_0 | Clustered           | 48 VC_1119_0 | 48 | 0.852  | 1          | 0.852  | 0 | 0 | 0 | 1 Ref |
| MH572414 | Unassigned | Unassigned | Unassigned | 1387_0 | Clustered           | 6 VC_1387_0  | 6  | 0.5972 | 0.99460389 | 0.5939 | 0 | 0 | 0 | 1 Ref |
| MH572418 | Unassigned | Unassigned | Unassigned | 1025_0 | Clustered           | 8 VC_1025_0  | 8  | 0.386  | 1          | 0.386  | 0 | 0 | 0 | 1 Ref |
| MH572419 | Unassigned | Unassigned | Unassigned | 411_0  | Clustered           | 48 VC_411_0  | 48 | 0.4808 | 1          | 0.4808 | 0 | 0 | 0 | 1 Ref |
| MH572422 | Unassigned | Unassigned | Unassigned | 206_0  | Clustered           | 28 VC_206_0  | 28 | 0.2427 | 0.99971175 | 0.2426 | 0 | 0 | 0 | 1 Ref |
| MH572423 | Unassigned | Unassigned | Unassigned | 1028_0 | Clustered           | 69 VC_1028_0 | 69 | 0.8547 | 1          | 0.8547 | 0 | 0 | 0 | 1 Ref |
| MH572424 | Unassigned | Unassigned | Unassigned | 1028_0 | Clustered           | 69 VC_1028_0 | 69 | 0.8547 | 1          | 0.8547 | 0 | 0 | 0 | 1 Ref |
| MH572425 | Unassigned | Unassigned | Unassigned | 1031_0 | Clustered           | 2 VC_1031_0  | 2  | 0.0513 | 0.93901809 | 0.0482 | 0 | 0 | 0 | 1 Ref |
| MH572426 | Unassigned | Unassigned | Unassigned | 1032_0 | Clustered           | 2 VC_1032_0  | 2  | 0.0274 | 0.73989325 | 0.0202 | 0 | 0 | 0 | 1 Ref |
| MH572427 | Unassigned | Unassigned | Unassigned | 1028_0 | Clustered           | 69 VC_1028_0 | 69 | 0.8547 | 1          | 0.8547 | 0 | 0 | 0 | 1 Ref |
| MH572428 | Unassigned | Unassigned | Unassigned | 1028_0 | Clustered           | 69 VC_1028_0 | 69 | 0.8547 | 1          | 0.8547 | 0 | 0 | 0 | 1 Ref |
| MH572430 | Unassigned | Unassigned | Unassigned | 417_0  | Clustered           | 20 VC_417_0  | 20 | 0.6581 | 1          | 0.6581 | 0 | 0 | 0 | 1 Ref |
| MH572431 | Unassigned | Unassigned | Unassigned | 411_0  | Clustered           | 48 VC_411_0  | 48 | 0.4808 | 1          | 0.4808 | 0 | 0 | 0 | 1 Ref |
| MH572434 | Unassigned | Unassigned | Unassigned | 209_0  | Clustered           | 3 VC_209_0   | 3  | 0.0996 | 0.69690761 | 0.0694 | 0 | 0 | 0 | 1 Ref |
| MH572435 | Unassigned | Unassigned | Unassigned | 412_0  | Clustered           | 25 VC_412_0  | 25 | 0.5642 | 1          | 0.5642 | 0 | 0 | 0 | 1 Ref |
| MH572436 | Unassigned | Unassigned | Unassigned | 412_0  | Clustered           | 25 VC_412_0  | 25 | 0.5642 | 1          | 0.5642 | 0 | 0 | 0 | 1 Ref |
| MH572437 | Unassigned | Unassigned | Unassigned | 412_0  | Clustered           | 25 VC_412_0  | 25 | 0.5642 | 1          | 0.5642 | 0 | 0 | 0 | 1 Ref |
| MH572438 | Unassigned | Unassigned | Unassigned | 206_0  | Clustered           | 28 VC_206_0  | 28 | 0.2427 | 0.99971175 | 0.2426 | 0 | 0 | 0 | 1 Ref |
| MH572439 | Unassigned | Unassigned | Unassigned | 411_0  | Clustered           | 48 VC_411_0  | 48 | 0.4808 | 1          | 0.4808 | 0 | 0 | 0 | 1 Ref |
| MH572441 | Unassigned | Unassigned | Unassigned | 411_0  | Clustered           | 48 VC_411_0  | 48 | 0.4808 | 1          | 0.4808 | 0 | 0 | 0 | 1 Ref |
| MH572443 | Unassigned | Unassigned | Unassigned | 411_0  | Clustered           | 48 VC_411_0  | 48 | 0.4808 | 1          | 0.4808 | 0 | 0 | 0 | 1 Ref |
| MH572444 | Unassigned | Unassigned | Unassigned | 206_0  | Clustered           | 28 VC_206_0  | 28 | 0.2427 | 0.99971175 | 0.2426 | 0 | 0 | 0 | 1 Ref |
| MH572445 | Unassigned | Unassigned | Unassigned | 411_0  | Clustered           | 48 VC_411_0  | 48 | 0.4808 | 1          | 0.4808 | 0 | 0 | 0 | 1 Ref |
| MH572446 | Unassigned | Unassigned | Unassigned | 411_0  | Clustered           | 48 VC_411_0  | 48 | 0.4808 | 1          | 0.4808 | 0 | 0 | 0 | 1 Ref |
| MH572448 | Unassigned | Unassigned | Unassigned | 206_0  | Clustered           | 28 VC_206_0  | 28 | 0.2427 | 0.99971175 | 0.2426 | 0 | 0 | 0 | 1 Ref |
| MH572451 | Unassigned | Unassigned | Unassigned | 411_0  | Clustered           | 48 VC_411_0  | 48 | 0.4808 | 1          | 0.4808 | 0 | 0 | 0 | 1 Ref |
| MH572452 | Unassigned | Unassigned | Unassigned | 206_0  | Clustered           | 28 VC_206_0  | 28 | 0.2427 | 0.99971175 | 0.2426 | 0 | 0 | 0 | 1 Ref |
| MH572453 | Unassigned | Unassigned | Unassigned | 207_0  | Clustered           | 12 VC_207_0  | 12 | 0.4465 | 1          | 0.4465 | 0 | 0 | 0 | 1 Ref |
| MH572454 | Unassigned | Unassigned | Unassigned | 206_0  | Clustered           | 28 VC_206_0  | 28 | 0.2427 | 0.99971175 | 0.2426 | 0 | 0 | 0 | 1 Ref |
| MH572455 | Unassigned | Unassigned | Unassigned | 1025_0 | Clustered           | 8 VC_1025_0  | 8  | 0.386  | 1          | 0.386  | 0 | 0 | 0 | 1 Ref |
| MH572457 | Unassigned | Unassigned | Unassigned | 1121_0 | Clustered           | 6 VC_1121_0  | 6  | 0.9299 | 0.89096579 | 0.8285 | 0 | 0 | 0 | 1 Ref |
| MH572458 | Unassigned | Unassigned | Unassigned | 1130_0 | Clustered           | 3 VC_1130_0  | 3  | 0.7736 | 0.82711071 | 0.6399 | 0 | 0 | 0 | 1 Ref |
| MH572459 | Unassigned | Unassigned | Unassigned | 1104_0 | Clustered           | 44 VC_1104_0 | 44 | 0.9574 | 0.72818579 | 0.6972 | 0 | 0 | 0 | 1 Ref |
| MH572460 | Unassigned | Unassigned | Unassigned | 1104_0 | Clustered           | 44 VC_1104_0 | 44 | 0.9574 | 0.72818579 | 0.6972 | 0 | 0 | 0 | 1 Ref |
| MH572461 | Unassigned | Unassigned | Unassigned | 1104_0 | Clustered           | 44 VC_1104_0 | 44 | 0.9574 | 0.72818579 | 0.6972 | 0 | 0 | 0 | 1 Ref |
| MH572462 | Unassigned | Unassigned | Unassigned | 1104_0 | Clustered           | 44 VC_1104_0 | 44 | 0.9574 | 0.72818579 | 0.6972 | 0 | 0 | 0 | 1 Ref |
| MH572463 | Unassigned | Unassigned | Unassigned | 1104_0 | Clustered           | 44 VC_1104_0 | 44 | 0.9574 | 0.72818579 | 0.6972 | 0 | 0 | 0 | 1 Ref |
| MH572465 | Unassigned | Unassigned | Unassigned | 1104_0 | Clustered           | 44 VC_1104_0 | 44 | 0.9574 | 0.72818579 | 0.6972 | 0 | 0 | 0 | 1 Ref |
| MH572466 | Unassigned | Unassigned | Unassigned | 1028_0 | Clustered           | 69 VC_1028_0 | 69 | 0.8547 | 1          | 0.8547 | 0 | 0 | 0 | 1 Ref |
| MH572467 | Unassigned | Unassigned | Unassigned | 1126_0 | Clustered           | 9 VC_1126_0  | 9  | 0.6544 | 1          | 0.6544 | 0 | 0 | 0 | 1 Ref |
| MH572468 | Unassigned | Unassigned | Unassigned | 1126_0 | Clustered           | 9 VC_1126_0  | 9  | 0.6544 | 1          | 0.6544 | 0 | 0 | 0 | 1 Ref |
| MH572469 | Unassigned | Unassigned | Unassigned | 412_0  | Clustered           | 25 VC_412_0  | 25 | 0.5642 | 1          | 0.5642 | 0 | 0 | 0 | 1 Ref |
| MH572470 | Unassigned | Unassigned | Unassigned | 417_0  | Clustered           | 20 VC_417_0  | 20 | 0.6581 | 1          | 0.6581 | 0 | 0 | 0 | 1 Ref |
| MH572471 | Unassigned | Unassigned | Unassigned | 417_0  | Clustered           | 20 VC_417_0  | 20 | 0.6581 | 1          | 0.6581 | 0 | 0 | 0 | 1 Ref |
| MH572472 | Unassigned | Unassigned | Unassigned | 417_0  | Clustered           | 20 VC_417_0  | 20 | 0.6581 | 1          | 0.6581 | 0 | 0 | 0 | 1 Ref |
| MH572473 | Unassigned | Unassigned | Unassigned | 411_0  | Clustered           | 48 VC_411_0  | 48 | 0.4808 | 1          | 0.4808 | 0 | 0 | 0 | 1 Ref |
| MH572475 | Unassigned | Unassigned | Unassigned | 209_0  | Clustered           | 3 VC_209_0   | 3  | 0.0996 | 0.69690761 | 0.0694 | 0 | 0 | 0 | 1 Ref |
| MH572479 | Unassigned | Unassigned | Unassigned | 415_0  | Clustered/Singleton | 1 VC_415_0   | 1  | 0      | 1          | 0      | 0 | 0 | 0 | 1 Ref |
| MH572480 | Unassigned | Unassigned | Unassigned | 412_0  | Clustered           | 25 VC_412_0  | 25 | 0.5642 | 1          | 0.5642 | 0 | 0 | 0 | 1 Ref |
| MH572482 | Unassigned | Unassigned | Unassigned | 1121_0 | Clustered           | 6 VC_1121_0  | 6  | 0.9299 | 0.89096579 | 0.8285 | 0 | 0 | 0 | 1 Ref |
| MH572483 | Unassigned | Unassigned | Unassigned | 1121_0 | Clustered           | 6 VC_1121_0  | 6  | 0.9299 | 0.89096579 | 0.8285 | 0 | 0 | 0 | 1 Ref |
| MH572484 | Unassigned | Unassigned | Unassigned | 1401_0 | Clustered           | 4 VC_1401_0  | 4  | 1      | 1          | 1      | 0 | 0 | 0 | 1 Ref |
| MH572485 | Unassigned | Unassigned | Unassigned | 1387_0 | Clustered           | 6 VC_1387_0  | 6  | 0.5972 | 0.99460389 | 0.5939 | 0 | 0 | 0 | 1 Ref |
| MH572486 | Unassigned | Unassigned | Unassigned | 1119_0 | Clustered           | 48 VC_1119_0 | 48 | 0.852  | 1          | 0.852  | 0 | 0 | 0 | 1 Ref |
| MH572487 | Unassigned | Unassigned | Unassigned | 411_0  | Clustered           | 48 VC_411_0  | 48 | 0.4808 | 1          | 0.4808 | 0 | 0 | 0 | 1 Ref |
| MH572489 | Unassigned | Unassigned | Unassigned | 1131_0 | Clustered           | 2 VC_1131_0  | 2  | 0.5449 | 0.5        | 0.2725 | 0 | 0 | 0 | 1 Ref |
| MH572490 | Unassigned | Unassigned | Unassigned | 1420_0 | Clustered           | 6 VC_1420_0  | 6  | 1      | 1          | 1      | 0 | 0 | 0 | 1 Ref |
| MH572491 | Unassigned | Unassigned | Unassigned | 1420_0 | Clustered           | 6 VC_1420_0  | 6  | 1      | 1          | 1      | 0 | 0 | 0 | 1 Ref |
| MH572492 | Unassigned | Unassigned | Unassigned | 411_0  | Clustered           | 48 VC_411_0  | 48 | 0.4808 | 1          | 0.4808 | 0 | 0 | 0 | 1 Ref |
| MH572493 | Unassigned | Unassigned | Unassigned | 411_0  | Clustered           | 48 VC_411_0  | 48 | 0.4808 | 1          | 0.4808 | 0 | 0 | 0 | 1 Ref |
| MH572494 | Unassigned | Unassigned | Unassigned | 411_0  | Clustered           | 48 VC_411_0  | 48 | 0.4808 | 1          | 0.4808 | 0 | 0 | 0 | 1 Ref |
| MH572495 | Unassigned | Unassigned | Unassigned | 1028_0 | Clustered           | 69 VC_1028_0 | 69 | 0.8547 | 1          | 0.8547 | 0 | 0 | 0 | 1 Ref |
| MH572496 | Unassigned | Unassigned | Unassigned | 1126_0 | Clustered           | 9 VC_1126_0  | 9  | 0.6544 | 1          | 0.6544 | 0 | 0 | 0 | 1 Ref |
| MH572497 | Unassigned | Unassigned | Unassigned | 1126_0 | Clustered           | 9 VC_1126_0  | 9  | 0.6544 | 1          | 0.6544 | 0 | 0 | 0 | 1 Ref |
| MH572498 | Unassigned | Unassigned | Unassigned | 1126_0 | Clustered           | 9 VC_1126_0  | 9  | 0.6544 | 1          | 0.6544 | 0 | 0 | 0 | 1 Ref |
| MH572499 | Unassigned | Unassigned | Unassigned | 1126_0 | Clustered           | 9 VC_1126_0  | 9  | 0.6544 | 1          | 0.6544 | 0 | 0 | 0 | 1 Ref |
| MH572500 | Unassigned | Unassigned | Unassigned | 1126_0 | Clustered           | 9 VC_1126_0  | 9  | 0.6544 | 1          | 0.6544 | 0 | 0 | 0 | 1 Ref |
| MH572503 | Unassigned | Unassigned | Unassigned | 411_0  | Clustered           | 48 VC_411_0  | 48 | 0.4808 | 1          | 0.4808 | 0 | 0 | 0 | 1 Ref |
| MH572504 | Unassigned | Unassigned | Unassigned | 1028_0 | Clustered           | 69 VC_1028_0 | 69 | 0.8547 | 1          | 0.8547 | 0 | 0 | 0 | 1 Ref |
| MH572505 | Unassigned | Unassigned | Unassigned | 417_0  | Clustered           | 20 VC_417_0  | 20 | 0.6581 | 1          | 0.6581 | 0 | 0 | 0 | 1 Ref |
| MH572506 | Unassigned | Unassigned | Unassigned | 417_0  | Clustered           | 20 VC_417_0  | 20 | 0.6581 | 1          | 0.6581 | 0 | 0 | 0 | 1 Ref |
| MH572507 | Unassigned | Unassigned | Unassigned | 417_0  | Clustered           | 20 VC_417_0  | 20 | 0.6581 | 1          | 0.6581 | 0 | 0 | 0 | 1 Ref |
| MH572508 | Unassigned | Unassigned | Unassigned | 412_0  | Clustered           | 25 VC_412_0  | 25 | 0.5642 | 1          | 0.5642 | 0 | 0 | 0 | 1 Ref |
| MH572509 | Unassigned | Unassigned | Unassigned | 412_0  | Clustered           | 25 VC_412_0  | 25 | 0.5642 | 1          | 0.5642 | 0 | 0 | 0 | 1 Ref |
| MH572510 | Unassigned | Unassigned | Unassigned | 411_0  | Clustered           | 48 VC_411_0  | 48 | 0.4808 | 1          | 0.4808 | 0 | 0 | 0 | 1 Ref |
| MH572511 | Unassigned | Unassigned | Unassigned | 411_0  | Clustered           | 48 VC_411_0  | 48 | 0.4808 | 1          | 0.4808 | 0 | 0 | 0 | 1 Ref |



|          |            |            |            |        |                     |              |     |        |            |        |   |   |   |            |
|----------|------------|------------|------------|--------|---------------------|--------------|-----|--------|------------|--------|---|---|---|------------|
| MH572512 | Unassigned | Unassigned | Unassigned | 416_0  | Clustered/Singleton | 1 VC_416_0   | 1   | 0      | 1          | 0      | 0 | 0 | 0 | 1 Ref      |
| MH572513 | Unassigned | Unassigned | Unassigned | 207_0  | Clustered           | 12 VC_207_0  | 12  | 0.4465 | 1          | 0.4465 | 0 | 0 | 0 | 1 Ref      |
| MH572514 | Unassigned | Unassigned | Unassigned | 207_0  | Clustered           | 12 VC_207_0  | 12  | 0.4465 | 1          | 0.4465 | 0 | 0 | 0 | 1 Ref      |
| MH572515 | Unassigned | Unassigned | Unassigned | 1025_0 | Clustered           | 8 VC_1025_0  | 8   | 0.386  | 1          | 0.386  | 0 | 0 | 0 | 1 Ref      |
| MH572516 | Unassigned | Unassigned | Unassigned | 1419_0 | Clustered           | 8 VC_1419_0  | 8   | 0.8724 | 0.99998222 | 0.8724 | 0 | 0 | 0 | 1 Ref      |
| MH572517 | Unassigned | Unassigned | Unassigned | 1420_0 | Clustered           | 6 VC_1420_0  | 6   | 1      | 1          | 1      | 0 | 0 | 0 | 1 Ref      |
| MH572518 | Unassigned | Unassigned | Unassigned | 1420_0 | Clustered           | 6 VC_1420_0  | 6   | 1      | 1          | 1      | 0 | 0 | 0 | 1 Ref      |
| MH572519 | Unassigned | Unassigned | Unassigned | 1420_0 | Clustered           | 6 VC_1420_0  | 6   | 1      | 1          | 1      | 0 | 0 | 0 | 1 Ref      |
| MH572520 | Unassigned | Unassigned | Unassigned | 1420_0 | Clustered           | 6 VC_1420_0  | 6   | 1      | 1          | 1      | 0 | 0 | 0 | 1 Ref      |
| MH572521 | Unassigned | Unassigned | Unassigned | 1119_0 | Clustered           | 48 VC_1119_0 | 48  | 0.852  | 1          | 0.852  | 0 | 0 | 0 | 1 Ref      |
| MH572522 | Unassigned | Unassigned | Unassigned | 1387_0 | Clustered           | 6 VC_1387_0  | 6   | 0.5972 | 0.99460389 | 0.5939 | 0 | 0 | 0 | 1 Ref      |
| MH572524 | Unassigned | Unassigned | Unassigned | 1388_0 | Clustered           | 4 VC_1388_0  | 4   | 0.6008 | 0.54407361 | 0.3269 | 0 | 0 | 0 | 1 Ref      |
| MH572525 | Unassigned | Unassigned | Unassigned | 1299_0 | Clustered           | 53 VC_1299_0 | 53  | 0.8666 | 1          | 0.8666 | 0 | 0 | 0 | 1 Ref      |
| MH572526 | Unassigned | Unassigned | Unassigned | 1299_0 | Clustered           | 53 VC_1299_0 | 53  | 0.8666 | 1          | 0.8666 | 0 | 0 | 0 | 1 Ref      |
| MH576948 | Unassigned | Unassigned | Unassigned | 985_0  | Clustered           | 38 VC_985_0  | 38  | 0.9334 | 1          | 0.9334 | 0 | 0 | 0 | 1 Ref      |
| MH576949 | Unassigned | Unassigned | Unassigned | 532_0  | Clustered           | 75 VC_532_0  | 75  | 0.9393 | 1          | 0.9393 | 0 | 0 | 0 | 1 Ref      |
| MH576950 | Unassigned | Unassigned | Unassigned | 985_0  | Clustered           | 38 VC_985_0  | 38  | 0.9334 | 1          | 0.9334 | 0 | 0 | 0 | 1 Ref      |
| MH576951 | Unassigned | Unassigned | Unassigned | 985_0  | Clustered           | 38 VC_985_0  | 38  | 0.9334 | 1          | 0.9334 | 0 | 0 | 0 | 1 Ref      |
| MH576952 | Unassigned | Unassigned | Unassigned | 985_0  | Clustered           | 38 VC_985_0  | 38  | 0.9334 | 1          | 0.9334 | 0 | 0 | 0 | 1 Ref      |
| MH576953 | Unassigned | Unassigned | Unassigned | 571_7  | Clustered           | 28 VC_571_7  | 28  | 0.1651 | 1          | 0.1651 | 0 | 0 | 0 | 0.8519 Ref |
| MH576954 | Unassigned | Unassigned | Unassigned | 384_4  | Clustered           | 5 VC_384_4   | 5   | 0.0134 | 0.99999971 | 0.0134 | 0 | 0 | 0 | 1 Ref      |
| MH576955 | Unassigned | Unassigned | Unassigned | 985_0  | Clustered           | 38 VC_985_0  | 38  | 0.9334 | 1          | 0.9334 | 0 | 0 | 0 | 1 Ref      |
| MH576956 | Unassigned | Unassigned | Unassigned | 571_1  | Clustered           | 4 VC_571_1   | 4   | 0.0158 | 0.99966394 | 0.0158 | 0 | 0 | 0 | 0.6667 Ref |
| MH576957 | Unassigned | Unassigned | Unassigned | 985_0  | Clustered           | 38 VC_985_0  | 38  | 0.9334 | 1          | 0.9334 | 0 | 0 | 0 | 1 Ref      |
| MH576958 | Unassigned | Unassigned | Unassigned | 384_13 | Clustered           | 33 VC_384_13 | 33  | 0.1785 | 1          | 0.1785 | 0 | 0 | 0 | 0.8769 Ref |
| MH576959 | Unassigned | Unassigned | Unassigned | 335_23 | Clustered           | 17 VC_335_23 | 17  | 0.0714 | 1          | 0.0714 | 0 | 0 | 0 | 0.6397 Ref |
| MH576960 | Unassigned | Unassigned | Unassigned | 789_0  | Clustered           | 34 VC_789_0  | 34  | 0.9167 | 1          | 0.9167 | 0 | 0 | 0 | 1 Ref      |
| MH576961 | Unassigned | Unassigned | Unassigned | 985_0  | Clustered           | 38 VC_985_0  | 38  | 0.9334 | 1          | 0.9334 | 0 | 0 | 0 | 1 Ref      |
| MH576962 | Unassigned | Unassigned | Unassigned | 1199_0 | Clustered           | 3 VC_1199_0  | 3   | 0.3136 | 0.99425123 | 0.3118 | 0 | 0 | 0 | 1 Ref      |
| MH576963 | Unassigned | Unassigned | Unassigned | 1407_0 | Clustered           | 78 VC_1407_0 | 78  | 0.9731 | 1          | 0.9731 | 0 | 0 | 0 | 1 Ref      |
| MH576964 | Unassigned | Unassigned | Unassigned | 1114_0 | Clustered           | 20 VC_1114_0 | 20  | 0.3238 | 1          | 0.3238 | 0 | 0 | 0 | 0.9842 Ref |
| MH576965 | Unassigned | Unassigned | Unassigned | 1114_0 | Clustered           | 20 VC_1114_0 | 20  | 0.3238 | 1          | 0.3238 | 0 | 0 | 0 | 0.9842 Ref |
| MH576966 | Unassigned | Unassigned | Unassigned | 245_0  | Clustered           | 17 VC_245_0  | 17  | 0.6081 | 1          | 0.6081 | 0 | 0 | 0 | 1 Ref      |
| MH576967 | Unassigned | Unassigned | Unassigned | 384_4  | Clustered           | 5 VC_384_4   | 5   | 0.0134 | 0.99999971 | 0.0134 | 0 | 0 | 0 | 1 Ref      |
| MH576968 | Unassigned | Unassigned | Unassigned | 1114_0 | Clustered           | 20 VC_1114_0 | 20  | 0.3238 | 1          | 0.3238 | 0 | 0 | 0 | 0.9842 Ref |
| MH576969 | Unassigned | Unassigned | Unassigned | 1217_0 | Clustered           | 41 VC_1217_0 | 41  | 0.9546 | 1          | 0.9546 | 0 | 0 | 0 | 0.9976 Ref |
| MH576970 | Unassigned | Unassigned | Unassigned | 384_15 | Clustered           | 44 VC_384_15 | 44  | 0.139  | 1          | 0.139  | 0 | 0 | 0 | 0.7474 Ref |
| MH576971 | Unassigned | Unassigned | Unassigned | 335_23 | Clustered           | 17 VC_335_23 | 17  | 0.0714 | 1          | 0.0714 | 0 | 0 | 0 | 0.6397 Ref |
| MH576972 | Unassigned | Unassigned | Unassigned | 590_0  | Clustered           | 9 VC_590_0   | 9   | 0.4952 | 1          | 0.4952 | 0 | 0 | 0 | 1 Ref      |
| MH576974 | Unassigned | Unassigned | Unassigned | 335_23 | Clustered           | 17 VC_335_23 | 17  | 0.0714 | 1          | 0.0714 | 0 | 0 | 0 | 0.6397 Ref |
| MH576975 | Unassigned | Unassigned | Unassigned | 335_40 | Clustered           | 2 VC_335_40  | 2   | 0.004  | 0.95751617 | 0.0039 | 0 | 0 | 0 | 1 Ref      |
| MH576976 | Unassigned | Unassigned | Unassigned | 896_0  | Clustered           | 9 VC_896_0   | 9   | 0.2604 | 1          | 0.2604 | 0 | 0 | 0 | 1 Ref      |
| MH576977 | Unassigned | Unassigned | Unassigned | 527_0  | Clustered           | 37 VC_527_0  | 37  | 0.9679 | 1          | 0.9679 | 0 | 0 | 0 | 1 Ref      |
| MH579717 | Unassigned | Unassigned | Unassigned | 496_0  | Clustered           | 22 VC_496_0  | 22  | 0.6101 | 1          | 0.6101 | 0 | 0 | 0 | 1 Ref      |
| MH586730 | Unassigned | Unassigned | Unassigned | 1090_0 | Clustered           | 8 VC_1090_0  | 8   | 0.6377 | 1          | 0.6377 | 0 | 0 | 0 | 1 Ref      |
| MH586731 | Unassigned | Unassigned | Unassigned | 340_0  | Clustered           | 2 VC_340_0   | 2   | 0.0051 | 0.9546458  | 0.0048 | 0 | 0 | 0 | 1 Ref      |
| MH587638 | Unassigned | Unassigned | Unassigned | 848_0  | Clustered           | 124 VC_848_0 | 124 | 0.9484 | 1          | 0.9484 | 0 | 0 | 0 | 1 Ref      |
| MH588544 | Unassigned | Unassigned | Unassigned | 1011_3 | Clustered           | 2 VC_1011_3  | 2   | 0.0256 | 0.88402892 | 0.0226 | 0 | 0 | 0 | 1 Ref      |
| MH588545 | Unassigned | Unassigned | Unassigned | 1011_2 | Clustered           | 2 VC_1011_2  | 2   | 0.0273 | 0.95410794 | 0.0261 | 0 | 0 | 0 | 1 Ref      |
| MH590587 | Unassigned | Unassigned | Unassigned | 571_8  | Clustered           | 19 VC_571_8  | 19  | 0.1031 | 1          | 0.1031 | 0 | 0 | 0 | 0.8713 Ref |
| MH590588 | Unassigned | Unassigned | Unassigned | 384_11 | Clustered           | 31 VC_384_11 | 31  | 0.0926 | 1          | 0.0926 | 0 | 0 | 0 | 0.7011 Ref |
| MH590589 | Unassigned | Unassigned | Unassigned | 1115_2 | Clustered           | 5 VC_1115_2  | 5   | 0.0998 | 0.99999315 | 0.0998 | 0 | 0 | 0 | 1 Ref      |
| MH590591 | Unassigned | Unassigned | Unassigned | 526_0  | Clustered           | 32 VC_526_0  | 32  | 0.9037 | 1          | 0.9037 | 0 | 0 | 0 | 1 Ref      |
| MH590592 | Unassigned | Unassigned | Unassigned | 577_0  | Clustered           | 21 VC_577_0  | 21  | 0.9908 | 1          | 0.9908 | 0 | 0 | 0 | 1 Ref      |
| MH590593 | Unassigned | Unassigned | Unassigned | 579_22 | Clustered           | 4 VC_579_22  | 4   | 0.0099 | 0.99020449 | 0.0098 | 0 | 0 | 0 | 0.8333 Ref |
| MH590594 | Unassigned | Unassigned | Unassigned | 384_10 | Clustered/Singleton | 1 VC_384_10  | 1   | 0      | 1          | 0      | 0 | 0 | 0 | 1 Ref      |
| MH590595 | Unassigned | Unassigned | Unassigned | 335_56 | Clustered           | 7 VC_335_56  | 7   | 0.0242 | 1          | 0.0242 | 0 | 0 | 0 | 0.9048 Ref |
| MH590596 | Unassigned | Unassigned | Unassigned | 538_78 | Clustered           | 2 VC_538_78  | 2   | 0.008  | 0.95761522 | 0.0076 | 0 | 0 | 0 | 1 Ref      |
| MH590597 | Unassigned | Unassigned | Unassigned | 1114_0 | Clustered           | 20 VC_1114_0 | 20  | 0.3238 | 1          | 0.3238 | 0 | 0 | 0 | 0.9842 Ref |
| MH590598 | Unassigned | Unassigned | Unassigned | 538_25 | Clustered/Singleton | 1 VC_538_25  | 1   | 0      | 1          | 0      | 0 | 0 | 0 | 1 Ref      |
| MH590599 | Unassigned | Unassigned | Unassigned | 1114_0 | Clustered           | 20 VC_1114_0 | 20  | 0.3238 | 1          | 0.3238 | 0 | 0 | 0 | 0.9842 Ref |
| MH590600 | Unassigned | Unassigned | Unassigned | 1415_0 | Clustered           | 31 VC_1415_0 | 31  | 0.8456 | 1          | 0.8456 | 0 | 0 | 0 | 1 Ref      |
| MH590601 | Unassigned | Unassigned | Unassigned | 1015_1 | Clustered           | 26 VC_1015_1 | 26  | 0.6989 | 1          | 0.6989 | 0 | 0 | 0 | 1 Ref      |
| MH590602 | Unassigned | Unassigned | Unassigned | 538_38 | Clustered           | 6 VC_538_38  | 6   | 0.0517 | 1          | 0.0517 | 0 | 0 | 0 | 0.8667 Ref |
| MH590603 | Unassigned | Unassigned | Unassigned | 1224_1 | Clustered/Singleton | 1 VC_1224_1  | 1   | 0      | 1          | 0      | 0 | 0 | 0 | 1 Ref      |
| MH590604 | Unassigned | Unassigned | Unassigned | 1203_0 | Clustered           | 28 VC_1203_0 | 28  | 0.4905 | 1          | 0.4905 | 0 | 0 | 0 | 1 Ref      |
| MH590605 | Unassigned | Unassigned | Unassigned | 783_0  | Clustered           | 67 VC_783_0  | 67  | 0.8945 | 1          | 0.8945 | 0 | 0 | 0 | 1 Ref      |
| MH590606 | Unassigned | Unassigned | Unassigned | 1203_0 | Clustered           | 28 VC_1203_0 | 28  | 0.4905 | 1          | 0.4905 | 0 | 0 | 0 | 1 Ref      |
| MH595538 | Unassigned | Unassigned | Unassigned | 358_3  | Clustered/Singleton | 1 VC_358_3   | 1   | 0      | 1          | 0      | 0 | 0 | 0 | 1 Ref      |
| MH598512 | Unassigned | Unassigned | Unassigned | 852_0  | Clustered           | 3 VC_852_0   | 3   | 0.4886 | 0.99843584 | 0.4878 | 0 | 0 | 0 | 1 Ref      |
| MH598798 | Unassigned | Unassigned | Unassigned | 496_0  | Clustered           | 22 VC_496_0  | 22  | 0.6101 | 1          | 0.6101 | 0 | 0 | 0 | 1 Ref      |
| MH598800 | Unassigned | Unassigned | Unassigned | 496_0  | Clustered           | 22 VC_496_0  | 22  | 0.6101 | 1          | 0.6101 | 0 | 0 | 0 | 1 Ref      |
| MH598801 | Unassigned | Unassigned | Unassigned | 496_0  | Clustered           | 22 VC_496_0  | 22  | 0.6101 | 1          | 0.6101 | 0 | 0 | 0 | 1 Ref      |
| MH598802 | Unassigned | Unassigned | Unassigned | 496_0  | Clustered           | 22 VC_496_0  | 22  | 0.6101 | 1          | 0.6101 | 0 | 0 | 0 | 1 Ref      |
| MH598803 | Unassigned | Unassigned | Unassigned | 496_0  | Clustered           | 22 VC_496_0  | 22  | 0.6101 | 1          | 0.6101 | 0 | 0 | 0 | 1 Ref      |
| MH598804 | Unassigned | Unassigned | Unassigned | 496_0  | Clustered           | 22 VC_496_0  | 22  | 0.6101 | 1          | 0.6101 | 0 | 0 | 0 | 1 Ref      |
| MH598805 | Unassigned | Unassigned | Unassigned | 496_0  | Clustered           | 22 VC_496_0  | 22  | 0.6101 | 1          | 0.6101 | 0 | 0 | 0 | 1 Ref      |
| MH598806 | Unassigned | Unassigned | Unassigned | 496_0  | Clustered           | 22 VC_496_0  | 22  | 0.6101 | 1          | 0.6101 | 0 | 0 | 0 | 1 Ref      |
| MH598807 | Unassigned | Unassigned | Unassigned | 496_0  | Clustered           | 22 VC_496_0  | 22  | 0.6101 | 1          | 0.6101 | 0 | 0 | 0 | 1 Ref      |
| MH599087 | Unassigned | Unassigned | Unassigned | 911_0  | Clustered           | 20 VC_911_0  | 20  | 0.9915 | 1          | 0.9915 | 0 | 0 | 0 | 1 Ref      |
| MH606185 | Unassigned | Unassigned | Unassigned | 87_5   | Clustered/Singleton | 1 VC_87_5    | 1   | 0      | 1          | 0      | 0 | 0 | 0 | 1 Ref      |



|          |            |            |            |        |                     |              |     |        |            |        |   |   |   |        |     |
|----------|------------|------------|------------|--------|---------------------|--------------|-----|--------|------------|--------|---|---|---|--------|-----|
| MH616963 | Unassigned | Unassigned | Unassigned | 691_0  | Clustered           | 18 VC_691_0  | 18  | 0.6865 | 1          | 0.6865 | 0 | 0 | 0 | 0.9477 | Ref |
| MH618488 | Unassigned | Unassigned | Unassigned | 110_0  | Clustered           | 33 VC_110_0  | 33  | 0.9488 | 1          | 0.9488 | 0 | 0 | 0 | 1      | Ref |
| MH629685 | Unassigned | Unassigned | Unassigned | 446_16 | Clustered/Singleton | 1 VC_446_16  | 1   | 0      | 1          | 0      | 0 | 0 | 0 | 1      | Ref |
| MH631453 | Unassigned | Unassigned | Unassigned | 611_0  | Clustered           | 50 VC_611_0  | 50  | 0.7306 | 1          | 0.7306 | 0 | 0 | 0 | 1      | Ref |
| MH631454 | Unassigned | Unassigned | Unassigned | 199_19 | Clustered           | 12 VC_199_19 | 12  | 0.0651 | 1          | 0.0651 | 0 | 0 | 0 | 0.8636 | Ref |
| MH632117 | Unassigned | Unassigned | Unassigned | 335_43 | Clustered           | 4 VC_335_43  | 4   | 0.014  | 0.99995965 | 0.014  | 0 | 0 | 0 | 1      | Ref |
| MH632118 | Unassigned | Unassigned | Unassigned | 335_28 | Clustered           | 2 VC_335_28  | 2   | 0.0044 | 0.95750955 | 0.0042 | 0 | 0 | 0 | 1      | Ref |
| MH632119 | Unassigned | Unassigned | Unassigned | 538_93 | Clustered           | 2 VC_538_93  | 2   | 0.0103 | 0.95762079 | 0.0099 | 0 | 0 | 0 | 1      | Ref |
| MH633484 | Unassigned | Unassigned | Unassigned | 972_0  | Clustered           | 99 VC_972_0  | 99  | 0.9113 | 1          | 0.9113 | 0 | 0 | 0 | 0.9928 | Ref |
| MH633485 | Unassigned | Unassigned | Unassigned | 972_0  | Clustered           | 99 VC_972_0  | 99  | 0.9113 | 1          | 0.9113 | 0 | 0 | 0 | 0.9928 | Ref |
| MH633486 | Unassigned | Unassigned | Unassigned | 972_0  | Clustered           | 99 VC_972_0  | 99  | 0.9113 | 1          | 0.9113 | 0 | 0 | 0 | 0.9928 | Ref |
| MH633487 | Unassigned | Unassigned | Unassigned | 972_0  | Clustered           | 99 VC_972_0  | 99  | 0.9113 | 1          | 0.9113 | 0 | 0 | 0 | 0.9928 | Ref |
| MH638294 | Unassigned | Unassigned | Unassigned | 168_0  | Clustered           | 18 VC_168_0  | 18  | 0.7394 | 1          | 0.7394 | 0 | 0 | 0 | 0.8627 | Ref |
| MH638309 | Unassigned | Unassigned | Unassigned | 195_3  | Clustered           | 9 VC_195_3   | 9   | 0.1955 | 1          | 0.1955 | 0 | 0 | 0 | 0.8611 | Ref |
| MH638310 | Unassigned | Unassigned | Unassigned | 912_0  | Clustered           | 10 VC_912_0  | 10  | 0.1994 | 1          | 0.1994 | 0 | 0 | 0 | 1      | Ref |
| MH638311 | Unassigned | Unassigned | Unassigned | 913_0  | Clustered           | 28 VC_913_0  | 28  | 0.6206 | 1          | 0.6206 | 0 | 0 | 0 | 0.9841 | Ref |
| MH638312 | Unassigned | Unassigned | Unassigned | 195_3  | Clustered           | 9 VC_195_3   | 9   | 0.1955 | 1          | 0.1955 | 0 | 0 | 0 | 0.8611 | Ref |
| MH643777 | Unassigned | Unassigned | Unassigned | 185_0  | Clustered           | 53 VC_185_0  | 53  | 0.9153 | 1          | 0.9153 | 0 | 0 | 0 | 1      | Ref |
| MH643778 | Unassigned | Unassigned | Unassigned | 185_0  | Clustered           | 53 VC_185_0  | 53  | 0.9153 | 1          | 0.9153 | 0 | 0 | 0 | 1      | Ref |
| MH645904 | Unassigned | Unassigned | Unassigned | 1008_0 | Clustered           | 6 VC_1008_0  | 6   | 0.2856 | 1          | 0.2856 | 0 | 0 | 0 | 1      | Ref |
| MH651166 | Unassigned | Unassigned | Unassigned | 1136_0 | Clustered           | 40 VC_1136_0 | 40  | 0.8746 | 1          | 0.8746 | 0 | 0 | 0 | 1      | Ref |
| MH651167 | Unassigned | Unassigned | Unassigned | 701_0  | Clustered           | 16 VC_701_0  | 16  | 0.2957 | 1          | 0.2957 | 0 | 0 | 0 | 0.9167 | Ref |
| MH651168 | Unassigned | Unassigned | Unassigned | 1136_0 | Clustered           | 40 VC_1136_0 | 40  | 0.8746 | 1          | 0.8746 | 0 | 0 | 0 | 1      | Ref |
| MH651169 | Unassigned | Unassigned | Unassigned | 538_45 | Clustered           | 7 VC_538_45  | 7   | 0.0632 | 1          | 0.0632 | 0 | 0 | 0 | 0.8095 | Ref |
| MH651170 | Unassigned | Unassigned | Unassigned | 535_1  | Clustered           | 108 VC_535_1 | 108 | 0.8479 | 1          | 0.8479 | 0 | 0 | 0 | 0.9955 | Ref |
| MH651171 | Unassigned | Unassigned | Unassigned | 245_0  | Clustered           | 17 VC_245_0  | 17  | 0.6081 | 1          | 0.6081 | 0 | 0 | 0 | 1      | Ref |
| MH651172 | Unassigned | Unassigned | Unassigned | 1115_2 | Clustered           | 5 VC_1115_2  | 5   | 0.0998 | 0.99999315 | 0.0998 | 0 | 0 | 0 | 1      | Ref |
| MH651174 | Unassigned | Unassigned | Unassigned | 571_6  | Clustered           | 22 VC_571_6  | 22  | 0.1207 | 1          | 0.1207 | 0 | 0 | 0 | 0.8095 | Ref |
| MH651175 | Unassigned | Unassigned | Unassigned | 384_16 | Clustered           | 42 VC_384_16 | 42  | 0.134  | 1          | 0.134  | 0 | 0 | 0 | 0.7282 | Ref |
| MH651176 | Unassigned | Unassigned | Unassigned | 578_1  | Clustered           | 11 VC_578_1  | 11  | 0.4919 | 1          | 0.4919 | 0 | 0 | 0 | 0.7818 | Ref |
| MH651177 | Unassigned | Unassigned | Unassigned | 384_4  | Clustered           | 5 VC_384_4   | 5   | 0.0134 | 0.99999971 | 0.0134 | 0 | 0 | 0 | 1      | Ref |
| MH651178 | Unassigned | Unassigned | Unassigned | 538_32 | Clustered/Singleton | 1 VC_538_32  | 1   | 0      | 1          | 0      | 0 | 0 | 0 | 1      | Ref |
| MH651179 | Unassigned | Unassigned | Unassigned | 532_0  | Clustered           | 75 VC_532_0  | 75  | 0.9393 | 1          | 0.9393 | 0 | 0 | 0 | 1      | Ref |
| MH651180 | Unassigned | Unassigned | Unassigned | 335_27 | Clustered           | 6 VC_335_27  | 6   | 0.0266 | 1          | 0.0266 | 0 | 0 | 0 | 0.8    | Ref |
| MH651181 | Unassigned | Unassigned | Unassigned | 1407_0 | Clustered           | 78 VC_1407_0 | 78  | 0.9731 | 1          | 0.9731 | 0 | 0 | 0 | 1      | Ref |
| MH651182 | Unassigned | Unassigned | Unassigned | 919_0  | Clustered           | 3 VC_919_0   | 3   | 0.3486 | 0.99831298 | 0.348  | 0 | 0 | 0 | 1      | Ref |
| MH651183 | Unassigned | Unassigned | Unassigned | 538_41 | Clustered           | 2 VC_538_41  | 2   | 0.0138 | 0.95761457 | 0.0132 | 0 | 0 | 0 | 1      | Ref |
| MH651184 | Unassigned | Unassigned | Unassigned | 384_15 | Clustered           | 44 VC_384_15 | 44  | 0.139  | 1          | 0.139  | 0 | 0 | 0 | 0.7474 | Ref |
| MH651185 | Unassigned | Unassigned | Unassigned | 578_1  | Clustered           | 11 VC_578_1  | 11  | 0.4919 | 1          | 0.4919 | 0 | 0 | 0 | 0.7818 | Ref |
| MH651186 | Unassigned | Unassigned | Unassigned | 384_16 | Clustered           | 42 VC_384_16 | 42  | 0.134  | 1          | 0.134  | 0 | 0 | 0 | 0.7282 | Ref |
| MH651188 | Unassigned | Unassigned | Unassigned | 538_80 | Clustered           | 3 VC_538_80  | 3   | 0.0291 | 0.99859904 | 0.0291 | 0 | 0 | 0 | 1      | Ref |
| MH651189 | Unassigned | Unassigned | Unassigned | 419_0  | Clustered           | 11 VC_419_0  | 11  | 0.9465 | 1          | 0.9465 | 0 | 0 | 0 | 1      | Ref |
| MH651190 | Unassigned | Unassigned | Unassigned | 1015_1 | Clustered           | 26 VC_1015_1 | 26  | 0.6989 | 1          | 0.6989 | 0 | 0 | 0 | 1      | Ref |
| MH669000 | Unassigned | Unassigned | Unassigned | 1138_0 | Clustered           | 16 VC_1138_0 | 16  | 0.4566 | 1          | 0.4566 | 0 | 0 | 0 | 1      | Ref |
| MH669001 | Unassigned | Unassigned | Unassigned | 538_21 | Clustered/Singleton | 1 VC_538_21  | 1   | 0      | 1          | 0      | 0 | 0 | 0 | 1      | Ref |
| MH669002 | Unassigned | Unassigned | Unassigned | 571_6  | Clustered           | 22 VC_571_6  | 22  | 0.1207 | 1          | 0.1207 | 0 | 0 | 0 | 0.8095 | Ref |
| MH669003 | Unassigned | Unassigned | Unassigned | 538_80 | Clustered           | 3 VC_538_80  | 3   | 0.0291 | 0.99859904 | 0.0291 | 0 | 0 | 0 | 1      | Ref |
| MH669004 | Unassigned | Unassigned | Unassigned | 1015_1 | Clustered           | 26 VC_1015_1 | 26  | 0.6989 | 1          | 0.6989 | 0 | 0 | 0 | 1      | Ref |
| MH669006 | Unassigned | Unassigned | Unassigned | 901_0  | Clustered           | 31 VC_901_0  | 31  | 0.8235 | 1          | 0.8235 | 0 | 0 | 0 | 0.8194 | Ref |
| MH669007 | Unassigned | Unassigned | Unassigned | 789_0  | Clustered           | 34 VC_789_0  | 34  | 0.9167 | 1          | 0.9167 | 0 | 0 | 0 | 1      | Ref |
| MH669008 | Unassigned | Unassigned | Unassigned | 579_50 | Clustered           | 15 VC_579_50 | 15  | 0.0467 | 1          | 0.0467 | 0 | 0 | 0 | 0.9238 | Ref |
| MH669011 | Unassigned | Unassigned | Unassigned | 335_44 | Clustered           | 3 VC_335_44  | 3   | 0.0157 | 0.99859171 | 0.0157 | 0 | 0 | 0 | 1      | Ref |
| MH669012 | Unassigned | Unassigned | Unassigned | 538_73 | Clustered           | 2 VC_538_73  | 2   | 0.0107 | 0.95762743 | 0.0102 | 0 | 0 | 0 | 1      | Ref |
| MH669013 | Unassigned | Unassigned | Unassigned | 789_0  | Clustered           | 34 VC_789_0  | 34  | 0.9167 | 1          | 0.9167 | 0 | 0 | 0 | 1      | Ref |
| MH669014 | Unassigned | Unassigned | Unassigned | 538_69 | Clustered/Singleton | 1 VC_538_69  | 1   | 0      | 1          | 0      | 0 | 0 | 0 | 1      | Ref |
| MH669015 | Unassigned | Unassigned | Unassigned | 1219_0 | Clustered           | 24 VC_1219_0 | 24  | 0.9519 | 1          | 0.9519 | 0 | 0 | 0 | 1      | Ref |
| MH669016 | Unassigned | Unassigned | Unassigned | 1015_1 | Clustered           | 26 VC_1015_1 | 26  | 0.6989 | 1          | 0.6989 | 0 | 0 | 0 | 1      | Ref |
| MH669017 | Unassigned | Unassigned | Unassigned | 566_4  | Clustered           | 16 VC_566_4  | 16  | 0.2517 | 0.99999998 | 0.2517 | 0 | 0 | 0 | 0.9417 | Ref |
| MH669274 | Unassigned | Unassigned | Unassigned | 801_0  | Clustered           | 37 VC_801_0  | 37  | 0.5672 | 1          | 0.5672 | 0 | 0 | 0 | 1      | Ref |
| MH674343 | Unassigned | Unassigned | Unassigned | 240_0  | Clustered           | 2 VC_240_0   | 2   | 0.7151 | 0.72985431 | 0.5219 | 0 | 0 | 0 | 1      | Ref |
| MH675552 | Unassigned | Unassigned | Unassigned | 1054_1 | Clustered           | 8 VC_1054_1  | 8   | 0.3937 | 1          | 0.3937 | 0 | 0 | 0 | 0.9286 | Ref |
| MH675927 | Unassigned | Unassigned | Unassigned | 872_0  | Clustered           | 28 VC_872_0  | 28  | 0.7887 | 1          | 0.7887 | 0 | 0 | 0 | 1      | Ref |
| MH684921 | Unassigned | Unassigned | Unassigned | 71_0   | Clustered           | 27 VC_71_0   | 27  | 0.5964 | 1          | 0.5964 | 0 | 0 | 0 | 0.9943 | Ref |
| MH688040 | Unassigned | Unassigned | Unassigned | 135_22 | Clustered           | 13 VC_135_22 | 13  | 0.0795 | 1          | 0.0795 | 0 | 0 | 0 | 0.8205 | Ref |
| MH688453 | Unassigned | Unassigned | Unassigned | 972_0  | Clustered           | 99 VC_972_0  | 99  | 0.9113 | 1          | 0.9113 | 0 | 0 | 0 | 0.9928 | Ref |
| MH697575 | Unassigned | Unassigned | Unassigned | 335_54 | Clustered           | 5 VC_335_54  | 5   | 0.0147 | 0.99999078 | 0.0147 | 0 | 0 | 0 | 0.7    | Ref |
| MH697576 | Unassigned | Unassigned | Unassigned | 539_0  | Clustered           | 37 VC_539_0  | 37  | 0.911  | 1          | 0.911  | 0 | 0 | 0 | 1      | Ref |
| MH697577 | Unassigned | Unassigned | Unassigned | 834_0  | Clustered           | 18 VC_834_0  | 18  | 0.9116 | 1          | 0.9116 | 0 | 0 | 0 | 1      | Ref |
| MH697578 | Unassigned | Unassigned | Unassigned | 243_0  | Clustered           | 72 VC_243_0  | 72  | 0.8089 | 1          | 0.8089 | 0 | 0 | 0 | 1      | Ref |
| MH697579 | Unassigned | Unassigned | Unassigned | 579_73 | Clustered           | 2 VC_579_73  | 2   | 0.0033 | 0.82635115 | 0.0027 | 0 | 0 | 0 | 1      | Ref |
| MH697580 | Unassigned | Unassigned | Unassigned | 419_0  | Clustered           | 11 VC_419_0  | 11  | 0.9465 | 1          | 0.9465 | 0 | 0 | 0 | 1      | Ref |
| MH697581 | Unassigned | Unassigned | Unassigned | 335_35 | Clustered           | 2 VC_335_35  | 2   | 0.004  | 0.95574341 | 0.0038 | 0 | 0 | 0 | 1      | Ref |
| MH697582 | Unassigned | Unassigned | Unassigned | 566_4  | Clustered           | 16 VC_566_4  | 16  | 0.2517 | 0.99999998 | 0.2517 | 0 | 0 | 0 | 0.9417 | Ref |
| MH697583 | Unassigned | Unassigned | Unassigned | 566_4  | Clustered           | 16 VC_566_4  | 16  | 0.2517 | 0.99999998 | 0.2517 | 0 | 0 | 0 | 0.9417 | Ref |
| MH697584 | Unassigned | Unassigned | Unassigned | 526_0  | Clustered           | 32 VC_526_0  | 32  | 0.9037 | 1          | 0.9037 | 0 | 0 | 0 | 1      | Ref |
| MH697585 | Unassigned | Unassigned | Unassigned | 539_0  | Clustered           | 37 VC_539_0  | 37  | 0.911  | 1          | 0.911  | 0 | 0 | 0 | 1      | Ref |
| MH697586 | Unassigned | Unassigned | Unassigned | 579_20 | Clustered           | 17 VC_579_20 | 17  | 0.0538 | 1          | 0.0538 | 0 | 0 | 0 | 0.9926 | Ref |
| MH697587 | Unassigned | Unassigned | Unassigned | 785_1  | Clustered           | 9 VC_785_1   | 9   | 0.3679 | 1          | 0.3679 | 0 | 0 | 0 | 1      | Ref |
| MH697588 | Unassigned | Unassigned | Unassigned | 535_1  | Clustered           | 108 VC_535_1 | 108 | 0.8479 | 1          | 0.8479 | 0 | 0 | 0 | 0.9955 | Ref |
| MH697590 | Unassigned | Unassigned | Unassigned | 579_20 | Clustered           | 17 VC_579_20 | 17  | 0.0538 | 1          | 0.0538 | 0 | 0 | 0 | 0.9926 | Ref |
| MH697591 | Unassigned | Unassigned | Unassigned | 223_6  | Clustered           | 42 VC_223_6  | 42  | 0.4717 | 1          | 0.4717 | 0 | 0 | 0 | 0.8351 | Ref |



|          |            |            |            |        |                     |              |     |        |            |        |   |   |   |            |
|----------|------------|------------|------------|--------|---------------------|--------------|-----|--------|------------|--------|---|---|---|------------|
| MH697592 | Unassigned | Unassigned | Unassigned | 245_0  | Clustered           | 17 VC_245_0  | 17  | 0.6081 | 1          | 0.6081 | 0 | 0 | 0 | 1 Ref      |
| MH697593 | Unassigned | Unassigned | Unassigned | 539_0  | Clustered           | 37 VC_539_0  | 37  | 0.911  | 1          | 0.911  | 0 | 0 | 0 | 1 Ref      |
| MH707430 | Unassigned | Unassigned | Unassigned | 1422_0 | Clustered           | 5 VC_1422_0  | 5   | 1      | 1          | 1      | 0 | 0 | 0 | 1 Ref      |
| MH709120 | Unassigned | Unassigned | Unassigned | 135_17 | Clustered/Singleton | 1 VC_135_17  | 1   | 0      | 1          | 0      | 0 | 0 | 0 | 1 Ref      |
| MH709121 | Unassigned | Unassigned | Unassigned | 135_10 | Clustered           | 10 VC_135_10 | 10  | 0.0522 | 1          | 0.0522 | 0 | 0 | 0 | 1 Ref      |
| MH713599 | Unassigned | Unassigned | Unassigned | 510_1  | Clustered           | 20 VC_510_1  | 20  | 0.4172 | 1          | 0.4172 | 0 | 0 | 0 | 1 Ref      |
| MH717096 | Unassigned | Unassigned | Unassigned | 32_1   | Clustered           | 16 VC_32_1   | 16  | 0.1962 | 1          | 0.1962 | 0 | 0 | 0 | 0.8333 Ref |
| MH717097 | Unassigned | Unassigned | Unassigned | 475_0  | Clustered           | 96 VC_475_0  | 96  | 0.9303 | 1          | 0.9303 | 0 | 0 | 0 | 0.9575 Ref |
| MH717098 | Unassigned | Unassigned | Unassigned | 405_0  | Clustered           | 126 VC_405_0 | 126 | 0.9614 | 1          | 0.9614 | 0 | 0 | 0 | 1 Ref      |
| MH717099 | Unassigned | Unassigned | Unassigned | 405_0  | Clustered           | 126 VC_405_0 | 126 | 0.9614 | 1          | 0.9614 | 0 | 0 | 0 | 1 Ref      |
| MH717709 | Unassigned | Unassigned | Unassigned | 398_0  | Clustered           | 51 VC_398_0  | 51  | 0.8741 | 1          | 0.8741 | 0 | 0 | 0 | 1 Ref      |
| MH719189 | Unassigned | Unassigned | Unassigned | 192_0  | Clustered           | 22 VC_192_0  | 22  | 0.6582 | 1          | 0.6582 | 0 | 0 | 0 | 1 Ref      |
| MH719190 | Unassigned | Unassigned | Unassigned | 192_0  | Clustered           | 22 VC_192_0  | 22  | 0.6582 | 1          | 0.6582 | 0 | 0 | 0 | 1 Ref      |
| MH719191 | Unassigned | Unassigned | Unassigned | 192_0  | Clustered           | 22 VC_192_0  | 22  | 0.6582 | 1          | 0.6582 | 0 | 0 | 0 | 1 Ref      |
| MH719192 | Unassigned | Unassigned | Unassigned | 192_0  | Clustered           | 22 VC_192_0  | 22  | 0.6582 | 1          | 0.6582 | 0 | 0 | 0 | 1 Ref      |
| MH719193 | Unassigned | Unassigned | Unassigned | 192_0  | Clustered           | 22 VC_192_0  | 22  | 0.6582 | 1          | 0.6582 | 0 | 0 | 0 | 1 Ref      |
| MH719194 | Unassigned | Unassigned | Unassigned | 192_0  | Clustered           | 22 VC_192_0  | 22  | 0.6582 | 1          | 0.6582 | 0 | 0 | 0 | 1 Ref      |
| MH719195 | Unassigned | Unassigned | Unassigned | 192_0  | Clustered           | 22 VC_192_0  | 22  | 0.6582 | 1          | 0.6582 | 0 | 0 | 0 | 1 Ref      |
| MH725810 | Unassigned | Unassigned | Unassigned | 77_0   | Clustered           | 37 VC_77_0   | 37  | 0.9392 | 1          | 0.9392 | 0 | 0 | 0 | 1 Ref      |
| MH727543 | Unassigned | Unassigned | Unassigned | 579_2  | Clustered           | 2 VC_579_2   | 2   | 0.0032 | 0.63743142 | 0.002  | 0 | 0 | 0 | 1 Ref      |
| MH727544 | Unassigned | Unassigned | Unassigned | 243_0  | Clustered           | 72 VC_243_0  | 72  | 0.8089 | 1          | 0.8089 | 0 | 0 | 0 | 1 Ref      |
| MH727546 | Unassigned | Unassigned | Unassigned | 526_0  | Clustered           | 32 VC_526_0  | 32  | 0.9037 | 1          | 0.9037 | 0 | 0 | 0 | 1 Ref      |
| MH727547 | Unassigned | Unassigned | Unassigned | 789_0  | Clustered           | 34 VC_789_0  | 34  | 0.9167 | 1          | 0.9167 | 0 | 0 | 0 | 1 Ref      |
| MH727548 | Unassigned | Unassigned | Unassigned | 538_5  | Clustered/Singleton | 1 VC_538_5   | 1   | 0      | 1          | 0      | 0 | 0 | 0 | 1 Ref      |
| MH727549 | Unassigned | Unassigned | Unassigned | 834_0  | Clustered           | 18 VC_834_0  | 18  | 0.9116 | 1          | 0.9116 | 0 | 0 | 0 | 1 Ref      |
| MH727551 | Unassigned | Unassigned | Unassigned | 566_4  | Clustered           | 16 VC_566_4  | 16  | 0.2517 | 0.9999998  | 0.2517 | 0 | 0 | 0 | 0.9417 Ref |
| MH727552 | Unassigned | Unassigned | Unassigned | 789_0  | Clustered           | 34 VC_789_0  | 34  | 0.9167 | 1          | 0.9167 | 0 | 0 | 0 | 1 Ref      |
| MH727553 | Unassigned | Unassigned | Unassigned | 973_0  | Clustered           | 15 VC_973_0  | 15  | 1      | 0          | 0      | 0 | 0 | 0 | 1 Ref      |
| MH727554 | Unassigned | Unassigned | Unassigned | 532_0  | Clustered           | 75 VC_532_0  | 75  | 0.9393 | 1          | 0.9393 | 0 | 0 | 0 | 1 Ref      |
| MH727555 | Unassigned | Unassigned | Unassigned | 384_16 | Clustered           | 42 VC_384_16 | 42  | 0.134  | 1          | 0.134  | 0 | 0 | 0 | 0.7282 Ref |
| MH727557 | Unassigned | Unassigned | Unassigned | 571_6  | Clustered           | 22 VC_571_6  | 22  | 0.1207 | 1          | 0.1207 | 0 | 0 | 0 | 0.8095 Ref |
| MH727558 | Unassigned | Unassigned | Unassigned | 579_56 | Clustered/Singleton | 1 VC_579_56  | 1   | 0      | 1          | 0      | 0 | 0 | 0 | 1 Ref      |
| MH727559 | Unassigned | Unassigned | Unassigned | 918_0  | Clustered           | 16 VC_918_0  | 16  | 0.2945 | 1          | 0.2945 | 0 | 0 | 0 | 1 Ref      |
| MH727560 | Unassigned | Unassigned | Unassigned | 1243_0 | Clustered           | 8 VC_1243_0  | 8   | 0.8266 | 1          | 0.8266 | 0 | 0 | 0 | 1 Ref      |
| MH727561 | Unassigned | Unassigned | Unassigned | 385_1  | Clustered           | 9 VC_385_1   | 9   | 0.1928 | 1          | 0.1928 | 0 | 0 | 0 | 1 Ref      |
| MH727562 | Unassigned | Unassigned | Unassigned | 973_0  | Clustered           | 15 VC_973_0  | 15  | 1      | 0          | 0      | 0 | 0 | 0 | 1 Ref      |
| MH727563 | Unassigned | Unassigned | Unassigned | 535_1  | Clustered           | 108 VC_535_1 | 108 | 0.8479 | 1          | 0.8479 | 0 | 0 | 0 | 0.9955 Ref |
| MH727564 | Unassigned | Unassigned | Unassigned | 1114_0 | Clustered           | 20 VC_1114_0 | 20  | 0.3238 | 0.93668477 | 0.3238 | 0 | 0 | 0 | 0.9842 Ref |
| MH727593 | Unassigned | Unassigned | Unassigned | 191_0  | Clustered           | 2 VC_191_0   | 2   | 0.7873 | 1          | 0.7375 | 0 | 0 | 0 | 1 Ref      |
| MH729818 | Unassigned | Unassigned | Unassigned | 466_0  | Clustered           | 66 VC_466_0  | 66  | 0.9246 | 1          | 0.9246 | 0 | 0 | 0 | 1 Ref      |
| MH729819 | Unassigned | Unassigned | Unassigned | 603_0  | Clustered           | 28 VC_603_0  | 28  | 0.7692 | 1          | 0.7692 | 0 | 0 | 0 | 1 Ref      |
| MH729874 | Unassigned | Unassigned | Unassigned | 509_0  | Clustered           | 36 VC_509_0  | 36  | 0.5291 | 1          | 0.5291 | 0 | 0 | 0 | 0.9714 Ref |
| MH730557 | Unassigned | Unassigned | Unassigned | 1423_0 | Clustered           | 11 VC_1423_0 | 11  | 1      | 0          | 0      | 0 | 0 | 0 | 1 Ref      |
| MH733496 | Unassigned | Unassigned | Unassigned | 801_0  | Clustered           | 37 VC_801_0  | 37  | 0.5672 | 1          | 0.5672 | 0 | 0 | 0 | 1 Ref      |
| MH744414 | Unassigned | Unassigned | Unassigned | 335_10 | Clustered           | 3 VC_335_10  | 3   | 0.012  | 0.99859169 | 0.012  | 0 | 0 | 0 | 1 Ref      |
| MH744415 | Unassigned | Unassigned | Unassigned | 538_36 | Clustered/Singleton | 1 VC_538_36  | 1   | 0      | 1          | 0      | 0 | 0 | 0 | 1 Ref      |
| MH744416 | Unassigned | Unassigned | Unassigned | 1407_0 | Clustered           | 78 VC_1407_0 | 78  | 0.9731 | 1          | 0.9731 | 0 | 0 | 0 | 1 Ref      |
| MH744417 | Unassigned | Unassigned | Unassigned | 384_16 | Clustered           | 42 VC_384_16 | 42  | 0.134  | 1          | 0.134  | 0 | 0 | 0 | 0.7282 Ref |
| MH744418 | Unassigned | Unassigned | Unassigned | 1199_1 | Clustered           | 2 VC_1199_1  | 2   | 0.1356 | 0.9073018  | 0.1231 | 0 | 0 | 0 | 1 Ref      |
| MH744419 | Unassigned | Unassigned | Unassigned | 1117_0 | Clustered           | 19 VC_1117_0 | 19  | 0.9177 | 1          | 0.9177 | 0 | 0 | 0 | 1 Ref      |
| MH744420 | Unassigned | Unassigned | Unassigned | 607_0  | Clustered           | 2 VC_607_0   | 2   | 0.0776 | 0.94661631 | 0.0735 | 0 | 0 | 0 | 1 Ref      |
| MH744421 | Unassigned | Unassigned | Unassigned | 1200_0 | Clustered           | 73 VC_1200_0 | 73  | 0.9825 | 1          | 0.9825 | 0 | 0 | 0 | 1 Ref      |
| MH744422 | Unassigned | Unassigned | Unassigned | 579_52 | Clustered/Singleton | 1 VC_579_52  | 1   | 0      | 1          | 0      | 0 | 0 | 0 | 1 Ref      |
| MH744423 | Unassigned | Unassigned | Unassigned | 385_2  | Clustered           | 5 VC_385_2   | 5   | 0.0717 | 0.99999997 | 0.0717 | 0 | 0 | 0 | 0.9 Ref    |
| MH744424 | Unassigned | Unassigned | Unassigned | 789_0  | Clustered           | 34 VC_789_0  | 34  | 0.9167 | 1          | 0.9167 | 0 | 0 | 0 | 1 Ref      |
| MH746814 | Unassigned | Unassigned | Unassigned | 715_0  | Clustered           | 10 VC_715_0  | 10  | 0.8045 | 1          | 0.8045 | 0 | 0 | 0 | 1 Ref      |
| MH746817 | Unassigned | Unassigned | Unassigned | 177_0  | Clustered           | 8 VC_177_0   | 8   | 0.5848 | 1          | 0.5848 | 0 | 0 | 0 | 1 Ref      |
| MH751506 | Unassigned | Unassigned | Unassigned | 290_92 | Clustered           | 4 VC_290_92  | 4   | 0.0078 | 0.99995066 | 0.0078 | 0 | 0 | 0 | 1 Ref      |
| MH752385 | Unassigned | Unassigned | Unassigned | 106_0  | Clustered           | 6 VC_106_0   | 6   | 0.8265 | 1          | 0.8265 | 0 | 0 | 0 | 1 Ref      |
| MH752840 | Unassigned | Unassigned | Unassigned | 794_11 | Clustered           | 6 VC_794_11  | 6   | 0.0305 | 0.83830784 | 0.0256 | 0 | 0 | 0 | 0.8 Ref    |
| MH763831 | Unassigned | Unassigned | Unassigned | 714_0  | Clustered           | 71 VC_714_0  | 71  | 0.935  | 1          | 0.935  | 0 | 0 | 0 | 1 Ref      |
| MH779498 | Unassigned | Unassigned | Unassigned | 579_49 | Clustered           | 7 VC_579_49  | 7   | 0.0194 | 0.98914431 | 0.0191 | 0 | 0 | 0 | 0.8571 Ref |
| MH779499 | Unassigned | Unassigned | Unassigned | 789_0  | Clustered           | 34 VC_789_0  | 34  | 0.9167 | 1          | 0.9167 | 0 | 0 | 0 | 1 Ref      |
| MH779500 | Unassigned | Unassigned | Unassigned | 384_3  | Clustered           | 22 VC_384_3  | 22  | 0.0786 | 1          | 0.0786 | 0 | 0 | 0 | 0.9048 Ref |
| MH779501 | Unassigned | Unassigned | Unassigned | 789_0  | Clustered           | 34 VC_789_0  | 34  | 0.9167 | 1          | 0.9167 | 0 | 0 | 0 | 1 Ref      |
| MH779502 | Unassigned | Unassigned | Unassigned | 579_54 | Clustered/Singleton | 1 VC_579_54  | 1   | 0      | 1          | 0      | 0 | 0 | 0 | 1 Ref      |
| MH779503 | Unassigned | Unassigned | Unassigned | 571_6  | Clustered           | 22 VC_571_6  | 22  | 0.1207 | 1          | 0.1207 | 0 | 0 | 0 | 0.8095 Ref |
| MH779504 | Unassigned | Unassigned | Unassigned | 578_1  | Clustered           | 11 VC_578_1  | 11  | 0.4919 | 1          | 0.4919 | 0 | 0 | 0 | 0.7818 Ref |
| MH779505 | Unassigned | Unassigned | Unassigned | 783_0  | Clustered           | 67 VC_783_0  | 67  | 0.8945 | 1          | 0.8945 | 0 | 0 | 0 | 1 Ref      |
| MH779506 | Unassigned | Unassigned | Unassigned | 985_0  | Clustered           | 38 VC_985_0  | 38  | 0.9334 | 1          | 0.9334 | 0 | 0 | 0 | 1 Ref      |
| MH779507 | Unassigned | Unassigned | Unassigned | 783_0  | Clustered           | 67 VC_783_0  | 67  | 0.8945 | 1          | 0.8945 | 0 | 0 | 0 | 1 Ref      |
| MH779508 | Unassigned | Unassigned | Unassigned | 789_0  | Clustered           | 34 VC_789_0  | 34  | 0.9167 | 1          | 0.9167 | 0 | 0 | 0 | 1 Ref      |
| MH779509 | Unassigned | Unassigned | Unassigned | 783_0  | Clustered           | 67 VC_783_0  | 67  | 0.8945 | 1          | 0.8945 | 0 | 0 | 0 | 1 Ref      |
| MH779510 | Unassigned | Unassigned | Unassigned | 789_0  | Clustered           | 34 VC_789_0  | 34  | 0.9167 | 1          | 0.9167 | 0 | 0 | 0 | 1 Ref      |
| MH779511 | Unassigned | Unassigned | Unassigned | 917_0  | Clustered           | 28 VC_917_0  | 28  | 0.5465 | 1          | 0.5465 | 0 | 0 | 0 | 1 Ref      |
| MH779512 | Unassigned | Unassigned | Unassigned | 1407_0 | Clustered           | 78 VC_1407_0 | 78  | 0.9731 | 1          | 0.9731 | 0 | 0 | 0 | 1 Ref      |
| MH779513 | Unassigned | Unassigned | Unassigned | 783_0  | Clustered           | 67 VC_783_0  | 67  | 0.8945 | 1          | 0.8945 | 0 | 0 | 0 | 1 Ref      |
| MH779514 | Unassigned | Unassigned | Unassigned | 783_0  | Clustered           | 67 VC_783_0  | 67  | 0.8945 | 1          | 0.8945 | 0 | 0 | 0 | 1 Ref      |
| MH779515 | Unassigned | Unassigned | Unassigned | 783_0  | Clustered           | 67 VC_783_0  | 67  | 0.8945 | 1          | 0.8945 | 0 | 0 | 0 | 1 Ref      |
| MH779516 | Unassigned | Unassigned | Unassigned | 384_16 | Clustered           | 42 VC_384_16 | 42  | 0.134  | 1          | 0.134  | 0 | 0 | 0 | 0.7282 Ref |
| MH779517 | Unassigned | Unassigned | Unassigned | 230_0  | Clustered           | 38 VC_230_0  | 38  | 0.9076 | 1          | 0.9076 | 0 | 0 | 0 | 1 Ref      |



|          |            |            |            |        |                     |              |     |        |            |        |   |   |   |            |
|----------|------------|------------|------------|--------|---------------------|--------------|-----|--------|------------|--------|---|---|---|------------|
| MH779518 | Unassigned | Unassigned | Unassigned | 706_0  | Clustered           | 52 VC_706_0  | 52  | 0.9787 | 1          | 0.9787 | 0 | 0 | 0 | 1 Ref      |
| MH779519 | Unassigned | Unassigned | Unassigned | 706_0  | Clustered           | 52 VC_706_0  | 52  | 0.9787 | 1          | 0.9787 | 0 | 0 | 0 | 1 Ref      |
| MH779520 | Unassigned | Unassigned | Unassigned | 706_0  | Clustered           | 52 VC_706_0  | 52  | 0.9787 | 1          | 0.9787 | 0 | 0 | 0 | 1 Ref      |
| MH779521 | Unassigned | Unassigned | Unassigned | 706_0  | Clustered           | 52 VC_706_0  | 52  | 0.9787 | 1          | 0.9787 | 0 | 0 | 0 | 1 Ref      |
| MH779522 | Unassigned | Unassigned | Unassigned | 706_0  | Clustered           | 52 VC_706_0  | 52  | 0.9787 | 1          | 0.9787 | 0 | 0 | 0 | 1 Ref      |
| MH779523 | Unassigned | Unassigned | Unassigned | 706_0  | Clustered           | 52 VC_706_0  | 52  | 0.9787 | 1          | 0.9787 | 0 | 0 | 0 | 1 Ref      |
| MH779524 | Unassigned | Unassigned | Unassigned | 706_0  | Clustered           | 52 VC_706_0  | 52  | 0.9787 | 1          | 0.9787 | 0 | 0 | 0 | 1 Ref      |
| MH779525 | Unassigned | Unassigned | Unassigned | 706_0  | Clustered           | 52 VC_706_0  | 52  | 0.9787 | 1          | 0.9787 | 0 | 0 | 0 | 1 Ref      |
| MH779526 | Unassigned | Unassigned | Unassigned | 706_0  | Clustered           | 52 VC_706_0  | 52  | 0.9787 | 1          | 0.9787 | 0 | 0 | 0 | 1 Ref      |
| MH779527 | Unassigned | Unassigned | Unassigned | 706_0  | Clustered           | 52 VC_706_0  | 52  | 0.9787 | 1          | 0.9787 | 0 | 0 | 0 | 1 Ref      |
| MH779619 | Unassigned | Unassigned | Unassigned | 405_0  | Clustered           | 126 VC_405_0 | 126 | 0.9614 | 1          | 0.9614 | 0 | 0 | 0 | 1 Ref      |
| MH791395 | Unassigned | Unassigned | Unassigned | 611_0  | Clustered           | 50 VC_611_0  | 50  | 0.7306 | 1          | 0.7306 | 0 | 0 | 0 | 1 Ref      |
| MH791396 | Unassigned | Unassigned | Unassigned | 611_0  | Clustered           | 50 VC_611_0  | 50  | 0.7306 | 1          | 0.7306 | 0 | 0 | 0 | 1 Ref      |
| MH791397 | Unassigned | Unassigned | Unassigned | 94_0   | Clustered           | 22 VC_94_0   | 22  | 0.5602 | 1          | 0.5602 | 0 | 0 | 0 | 1 Ref      |
| MH791398 | Unassigned | Unassigned | Unassigned | 457_4  | Clustered           | 10 VC_457_4  | 10  | 0.3316 | 1          | 0.3316 | 0 | 0 | 0 | 0.9333 Ref |
| MH791399 | Unassigned | Unassigned | Unassigned | 77_0   | Clustered           | 37 VC_77_0   | 37  | 0.9392 | 1          | 0.9392 | 0 | 0 | 0 | 1 Ref      |
| MH791400 | Unassigned | Unassigned | Unassigned | 341_0  | Clustered           | 27 VC_341_0  | 27  | 0.5058 | 1          | 0.5058 | 0 | 0 | 0 | 0.8661 Ref |
| MH791401 | Unassigned | Unassigned | Unassigned | 457_0  | Clustered           | 7 VC_457_0   | 7   | 0.2549 | 1          | 0.2549 | 0 | 0 | 0 | 0.7143 Ref |
| MH791402 | Unassigned | Unassigned | Unassigned | 475_0  | Clustered           | 96 VC_475_0  | 96  | 0.9303 | 1          | 0.9303 | 0 | 0 | 0 | 0.9575 Ref |
| MH791403 | Unassigned | Unassigned | Unassigned | 172_0  | Clustered           | 26 VC_172_0  | 26  | 0.7909 | 1          | 0.7909 | 0 | 0 | 0 | 1 Ref      |
| MH791404 | Unassigned | Unassigned | Unassigned | 457_4  | Clustered           | 10 VC_457_4  | 10  | 0.3316 | 1          | 0.3316 | 0 | 0 | 0 | 0.9333 Ref |
| MH791405 | Unassigned | Unassigned | Unassigned | 135_6  | Clustered/Singleton | 1 VC_135_6   | 1   | 0      | 1          | 0      | 0 | 0 | 0 | 1 Ref      |
| MH791406 | Unassigned | Unassigned | Unassigned | 172_0  | Clustered           | 26 VC_172_0  | 26  | 0.7909 | 1          | 0.7909 | 0 | 0 | 0 | 1 Ref      |
| MH791407 | Unassigned | Unassigned | Unassigned | 457_0  | Clustered           | 7 VC_457_0   | 7   | 0.2549 | 1          | 0.2549 | 0 | 0 | 0 | 0.7143 Ref |
| MH791408 | Unassigned | Unassigned | Unassigned | 77_0   | Clustered           | 37 VC_77_0   | 37  | 0.9392 | 1          | 0.9392 | 0 | 0 | 0 | 1 Ref      |
| MH791409 | Unassigned | Unassigned | Unassigned | 297_6  | Clustered           | 12 VC_297_6  | 12  | 0.1139 | 1          | 0.1139 | 0 | 0 | 0 | 0.8182 Ref |
| MH791410 | Unassigned | Unassigned | Unassigned | 475_0  | Clustered           | 96 VC_475_0  | 96  | 0.9303 | 1          | 0.9303 | 0 | 0 | 0 | 0.9575 Ref |
| MH791411 | Unassigned | Unassigned | Unassigned | 170_11 | Clustered           | 10 VC_170_11 | 10  | 0.1502 | 0.99999797 | 0.1502 | 0 | 0 | 0 | 0.9111 Ref |
| MH791412 | Unassigned | Unassigned | Unassigned | 475_0  | Clustered           | 96 VC_475_0  | 96  | 0.9303 | 1          | 0.9303 | 0 | 0 | 0 | 0.9575 Ref |
| MH791413 | Unassigned | Unassigned | Unassigned | 341_0  | Clustered           | 27 VC_341_0  | 27  | 0.5058 | 1          | 0.5058 | 0 | 0 | 0 | 0.8661 Ref |
| MH791414 | Unassigned | Unassigned | Unassigned | 457_2  | Clustered           | 2 VC_457_2   | 2   | 0.0288 | 0.87707845 | 0.0253 | 0 | 0 | 0 | 1 Ref      |
| MH791415 | Unassigned | Unassigned | Unassigned | 110_0  | Clustered           | 33 VC_110_0  | 33  | 0.9488 | 1          | 0.9488 | 0 | 0 | 0 | 1 Ref      |
| MH791416 | Unassigned | Unassigned | Unassigned | 77_0   | Clustered           | 37 VC_77_0   | 37  | 0.9392 | 1          | 0.9392 | 0 | 0 | 0 | 1 Ref      |
| MH800198 | Unassigned | Unassigned | Unassigned | 715_0  | Clustered           | 10 VC_715_0  | 10  | 0.8045 | 1          | 0.8045 | 0 | 0 | 0 | 1 Ref      |
| MH800199 | Unassigned | Unassigned | Unassigned | 715_0  | Clustered           | 10 VC_715_0  | 10  | 0.8045 | 1          | 0.8045 | 0 | 0 | 0 | 1 Ref      |
| MH800200 | Unassigned | Unassigned | Unassigned | 714_0  | Clustered           | 71 VC_714_0  | 71  | 0.935  | 1          | 0.935  | 0 | 0 | 0 | 1 Ref      |
| MH807810 | Unassigned | Unassigned | Unassigned | 472_0  | Clustered           | 5 VC_472_0   | 5   | 0.1909 | 0.99999997 | 0.1909 | 0 | 0 | 0 | 1 Ref      |
| MH807811 | Unassigned | Unassigned | Unassigned | 1018_0 | Clustered           | 38 VC_1018_0 | 38  | 0.9757 | 1          | 0.9757 | 0 | 0 | 0 | 1 Ref      |
| MH807812 | Unassigned | Unassigned | Unassigned | 133_0  | Clustered           | 17 VC_133_0  | 17  | 0.2654 | 1          | 0.2654 | 0 | 0 | 0 | 1 Ref      |
| MH807813 | Unassigned | Unassigned | Unassigned | 472_0  | Clustered           | 5 VC_472_0   | 5   | 0.1909 | 0.99999997 | 0.1909 | 0 | 0 | 0 | 1 Ref      |
| MH807814 | Unassigned | Unassigned | Unassigned | 1018_0 | Clustered           | 38 VC_1018_0 | 38  | 0.9757 | 1          | 0.9757 | 0 | 0 | 0 | 1 Ref      |
| MH807815 | Unassigned | Unassigned | Unassigned | 472_0  | Clustered           | 5 VC_472_0   | 5   | 0.1909 | 0.99999997 | 0.1909 | 0 | 0 | 0 | 1 Ref      |
| MH807816 | Unassigned | Unassigned | Unassigned | 1018_0 | Clustered           | 38 VC_1018_0 | 38  | 0.9757 | 1          | 0.9757 | 0 | 0 | 0 | 1 Ref      |
| MH807817 | Unassigned | Unassigned | Unassigned | 472_0  | Clustered           | 5 VC_472_0   | 5   | 0.1909 | 0.99999997 | 0.1909 | 0 | 0 | 0 | 1 Ref      |
| MH807818 | Unassigned | Unassigned | Unassigned | 1018_0 | Clustered           | 38 VC_1018_0 | 38  | 0.9757 | 1          | 0.9757 | 0 | 0 | 0 | 1 Ref      |
| MH807819 | Unassigned | Unassigned | Unassigned | 1018_0 | Clustered           | 38 VC_1018_0 | 38  | 0.9757 | 1          | 0.9757 | 0 | 0 | 0 | 1 Ref      |
| MH807820 | Unassigned | Unassigned | Unassigned | 133_0  | Clustered           | 17 VC_133_0  | 17  | 0.2654 | 1          | 0.2654 | 0 | 0 | 0 | 1 Ref      |
| MH809528 | Unassigned | Unassigned | Unassigned | 597_0  | Clustered           | 6 VC_597_0   | 6   | 0.9222 | 0.99999993 | 0.9222 | 0 | 0 | 0 | 1 Ref      |
| MH809529 | Unassigned | Unassigned | Unassigned | 544_0  | Clustered           | 6 VC_544_0   | 6   | 0.4346 | 1          | 0.4346 | 0 | 0 | 0 | 1 Ref      |
| MH809530 | Unassigned | Unassigned | Unassigned | 544_0  | Clustered           | 6 VC_544_0   | 6   | 0.4346 | 1          | 0.4346 | 0 | 0 | 0 | 1 Ref      |
| MH809531 | Unassigned | Unassigned | Unassigned | 544_0  | Clustered           | 6 VC_544_0   | 6   | 0.4346 | 1          | 0.4346 | 0 | 0 | 0 | 1 Ref      |
| MH809534 | Unassigned | Unassigned | Unassigned | 399_0  | Clustered           | 49 VC_399_0  | 49  | 0.7927 | 1          | 0.7927 | 0 | 0 | 0 | 1 Ref      |
| MH809535 | Unassigned | Unassigned | Unassigned | 290_34 | Clustered           | 4 VC_290_34  | 4   | 0.0081 | 0.9997166  | 0.0081 | 0 | 0 | 0 | 1 Ref      |
| MH816848 | Unassigned | Unassigned | Unassigned | 872_0  | Clustered           | 28 VC_872_0  | 28  | 0.7887 | 1          | 0.7887 | 0 | 0 | 0 | 1 Ref      |
| MH816966 | Unassigned | Unassigned | Unassigned | 636_0  | Clustered           | 13 VC_636_0  | 13  | 0.6223 | 1          | 0.6223 | 0 | 0 | 0 | 1 Ref      |
| MH817022 | Unassigned | Unassigned | Unassigned | 843_0  | Clustered           | 20 VC_843_0  | 20  | 0.9621 | 1          | 0.9621 | 0 | 0 | 0 | 1 Ref      |
| MH823906 | Unassigned | Unassigned | Unassigned | 687_0  | Clustered           | 21 VC_687_0  | 21  | 0.3608 | 1          | 0.3608 | 0 | 0 | 0 | 1 Ref      |
| MH825697 | Unassigned | Unassigned | Unassigned | 579_12 | Clustered           | 3 VC_579_12  | 3   | 0.0064 | 0.86841267 | 0.0056 | 0 | 0 | 0 | 1 Ref      |
| MH825698 | Unassigned | Unassigned | Unassigned | 1425_0 | Clustered           | 6 VC_1425_0  | 6   | 0.2364 | 1          | 0.2364 | 0 | 0 | 0 | 1 Ref      |
| MH825699 | Unassigned | Unassigned | Unassigned | 742_0  | Clustered           | 11 VC_742_0  | 11  | 0.5046 | 1          | 0.5046 | 0 | 0 | 0 | 1 Ref      |
| MH825700 | Unassigned | Unassigned | Unassigned | 1407_0 | Clustered           | 78 VC_1407_0 | 78  | 0.9731 | 1          | 0.9731 | 0 | 0 | 0 | 1 Ref      |
| MH825701 | Unassigned | Unassigned | Unassigned | 223_4  | Clustered           | 13 VC_223_4  | 13  | 0.1649 | 1          | 0.1649 | 0 | 0 | 0 | 1 Ref      |
| MH825702 | Unassigned | Unassigned | Unassigned | 384_15 | Clustered           | 44 VC_384_15 | 44  | 0.139  | 1          | 0.139  | 0 | 0 | 0 | 0.7474 Ref |
| MH825703 | Unassigned | Unassigned | Unassigned | 1116_0 | Clustered           | 24 VC_1116_0 | 24  | 0.8376 | 1          | 0.8376 | 0 | 0 | 0 | 1 Ref      |
| MH825704 | Unassigned | Unassigned | Unassigned | 223_6  | Clustered           | 42 VC_223_6  | 42  | 0.4717 | 1          | 0.4717 | 0 | 0 | 0 | 0.8351 Ref |
| MH825705 | Unassigned | Unassigned | Unassigned | 384_15 | Clustered           | 44 VC_384_15 | 44  | 0.139  | 1          | 0.139  | 0 | 0 | 0 | 0.7474 Ref |
| MH825706 | Unassigned | Unassigned | Unassigned | 1416_0 | Clustered           | 10 VC_1416_0 | 10  | 1      | 1          | 1      | 0 | 0 | 0 | 1 Ref      |
| MH825707 | Unassigned | Unassigned | Unassigned | 538_30 | Clustered           | 2 VC_538_30  | 2   | 0.0072 | 0.954469   | 0.0069 | 0 | 0 | 0 | 1 Ref      |
| MH825709 | Unassigned | Unassigned | Unassigned | 223_3  | Clustered           | 8 VC_223_3   | 8   | 0.0699 | 1          | 0.0699 | 0 | 0 | 0 | 0.8571 Ref |
| MH825710 | Unassigned | Unassigned | Unassigned | 535_1  | Clustered           | 108 VC_535_1 | 108 | 0.8479 | 1          | 0.8479 | 0 | 0 | 0 | 0.9955 Ref |
| MH825711 | Unassigned | Unassigned | Unassigned | 1204_0 | Clustered           | 25 VC_1204_0 | 25  | 0.7382 | 1          | 0.7382 | 0 | 0 | 0 | 1 Ref      |
| MH825713 | Unassigned | Unassigned | Unassigned | 579_50 | Clustered           | 15 VC_579_50 | 15  | 0.0467 | 1          | 0.0467 | 0 | 0 | 0 | 0.9238 Ref |
| MH834594 | Unassigned | Unassigned | Unassigned | 986_0  | Clustered           | 3 VC_986_0   | 3   | 0.1032 | 0.99917561 | 0.1032 | 0 | 0 | 0 | 1 Ref      |
| MH834595 | Unassigned | Unassigned | Unassigned | 1207_0 | Clustered           | 20 VC_1207_0 | 20  | 0.9898 | 1          | 0.9898 | 0 | 0 | 0 | 1 Ref      |
| MH834596 | Unassigned | Unassigned | Unassigned | 1287_0 | Clustered           | 44 VC_1287_0 | 44  | 1      | 1          | 1      | 0 | 0 | 0 | 1 Ref      |
| MH834597 | Unassigned | Unassigned | Unassigned | 986_0  | Clustered           | 3 VC_986_0   | 3   | 0.1032 | 0.99917561 | 0.1032 | 0 | 0 | 0 | 1 Ref      |
| MH834598 | Unassigned | Unassigned | Unassigned | 1075_0 | Clustered           | 11 VC_1075_0 | 11  | 0.6562 | 1          | 0.6562 | 0 | 0 | 0 | 0.9273 Ref |
| MH834599 | Unassigned | Unassigned | Unassigned | 1287_0 | Clustered           | 44 VC_1287_0 | 44  | 1      | 1          | 1      | 0 | 0 | 0 | 1 Ref      |
| MH834600 | Unassigned | Unassigned | Unassigned | 917_0  | Clustered           | 28 VC_917_0  | 28  | 0.5465 | 1          | 0.5465 | 0 | 0 | 0 | 1 Ref      |
| MH834602 | Unassigned | Unassigned | Unassigned | 1287_0 | Clustered           | 44 VC_1287_0 | 44  | 1      | 1          | 1      | 0 | 0 | 0 | 1 Ref      |
| MH834603 | Unassigned | Unassigned | Unassigned | 1074_0 | Clustered           | 6 VC_1074_0  | 6   | 0.4836 | 1          | 0.4836 | 0 | 0 | 0 | 1 Ref      |



|          |            |            |            |         |                     |     |            |     |        |            |        |   |   |   |            |
|----------|------------|------------|------------|---------|---------------------|-----|------------|-----|--------|------------|--------|---|---|---|------------|
| MH834604 | Unassigned | Unassigned | Unassigned | 1287_0  | Clustered           | 44  | VC_1287_0  | 44  | 1      | 1          | 1      | 0 | 0 | 0 | 1 Ref      |
| MH834605 | Unassigned | Unassigned | Unassigned | 1074_0  | Clustered           | 6   | VC_1074_0  | 6   | 0.4836 | 1          | 0.4836 | 0 | 0 | 0 | 1 Ref      |
| MH834606 | Unassigned | Unassigned | Unassigned | 1207_0  | Clustered           | 20  | VC_1207_0  | 20  | 0.9898 | 1          | 0.9898 | 0 | 0 | 0 | 1 Ref      |
| MH834607 | Unassigned | Unassigned | Unassigned | 1427_0  | Clustered           | 6   | VC_1427_0  | 6   | 1      | 1          | 1      | 0 | 0 | 0 | 1 Ref      |
| MH834608 | Unassigned | Unassigned | Unassigned | 1207_0  | Clustered           | 20  | VC_1207_0  | 20  | 0.9898 | 1          | 0.9898 | 0 | 0 | 0 | 1 Ref      |
| MH834609 | Unassigned | Unassigned | Unassigned | 1207_0  | Clustered           | 20  | VC_1207_0  | 20  | 0.9898 | 1          | 0.9898 | 0 | 0 | 0 | 1 Ref      |
| MH834610 | Unassigned | Unassigned | Unassigned | 1250_0  | Clustered           | 29  | VC_1250_0  | 29  | 0.822  | 1          | 0.822  | 0 | 0 | 0 | 1 Ref      |
| MH834611 | Unassigned | Unassigned | Unassigned | 1074_0  | Clustered           | 6   | VC_1074_0  | 6   | 0.4836 | 1          | 0.4836 | 0 | 0 | 0 | 1 Ref      |
| MH834612 | Unassigned | Unassigned | Unassigned | 1075_0  | Clustered           | 11  | VC_1075_0  | 11  | 0.6562 | 1          | 0.6562 | 0 | 0 | 0 | 0.9273 Ref |
| MH834613 | Unassigned | Unassigned | Unassigned | 591_0   | Clustered           | 4   | VC_591_0   | 4   | 0.1897 | 0.999859   | 0.1897 | 0 | 0 | 0 | 1 Ref      |
| MH834614 | Unassigned | Unassigned | Unassigned | 1074_0  | Clustered           | 6   | VC_1074_0  | 6   | 0.4836 | 1          | 0.4836 | 0 | 0 | 0 | 1 Ref      |
| MH834615 | Unassigned | Unassigned | Unassigned | 585_0   | Clustered           | 20  | VC_585_0   | 20  | 0.8376 | 1          | 0.8376 | 0 | 0 | 0 | 1 Ref      |
| MH834616 | Unassigned | Unassigned | Unassigned | 1207_0  | Clustered           | 20  | VC_1207_0  | 20  | 0.9898 | 1          | 0.9898 | 0 | 0 | 0 | 1 Ref      |
| MH834617 | Unassigned | Unassigned | Unassigned | 538_45  | Clustered           | 7   | VC_538_45  | 7   | 0.0632 | 1          | 0.0632 | 0 | 0 | 0 | 0.8095 Ref |
| MH834618 | Unassigned | Unassigned | Unassigned | 1207_0  | Clustered           | 20  | VC_1207_0  | 20  | 0.9898 | 1          | 0.9898 | 0 | 0 | 0 | 1 Ref      |
| MH834619 | Unassigned | Unassigned | Unassigned | 1250_0  | Clustered           | 29  | VC_1250_0  | 29  | 0.822  | 1          | 0.822  | 0 | 0 | 0 | 1 Ref      |
| MH834620 | Unassigned | Unassigned | Unassigned | 1207_0  | Clustered           | 20  | VC_1207_0  | 20  | 0.9898 | 1          | 0.9898 | 0 | 0 | 0 | 1 Ref      |
| MH834621 | Unassigned | Unassigned | Unassigned | 1076_0  | Clustered           | 6   | VC_1076_0  | 6   | 0.6773 | 1          | 0.6773 | 0 | 0 | 0 | 1 Ref      |
| MH834622 | Unassigned | Unassigned | Unassigned | 1427_0  | Clustered           | 6   | VC_1427_0  | 6   | 1      | 1          | 1      | 0 | 0 | 0 | 1 Ref      |
| MH834623 | Unassigned | Unassigned | Unassigned | 1074_0  | Clustered           | 6   | VC_1074_0  | 6   | 0.4836 | 1          | 0.4836 | 0 | 0 | 0 | 1 Ref      |
| MH834624 | Unassigned | Unassigned | Unassigned | 1207_0  | Clustered           | 20  | VC_1207_0  | 20  | 0.9898 | 1          | 0.9898 | 0 | 0 | 0 | 1 Ref      |
| MH834625 | Unassigned | Unassigned | Unassigned | 1075_0  | Clustered           | 11  | VC_1075_0  | 11  | 0.6562 | 1          | 0.6562 | 0 | 0 | 0 | 0.9273 Ref |
| MH834626 | Unassigned | Unassigned | Unassigned | 1287_0  | Clustered           | 44  | VC_1287_0  | 44  | 1      | 1          | 1      | 0 | 0 | 0 | 1 Ref      |
| MH834627 | Unassigned | Unassigned | Unassigned | 1076_0  | Clustered           | 6   | VC_1076_0  | 6   | 0.6773 | 1          | 0.6773 | 0 | 0 | 0 | 1 Ref      |
| MH834628 | Unassigned | Unassigned | Unassigned | 986_0   | Clustered           | 3   | VC_986_0   | 3   | 0.1032 | 0.9917561  | 0.1032 | 0 | 0 | 0 | 1 Ref      |
| MH834629 | Unassigned | Unassigned | Unassigned | 1250_0  | Clustered           | 29  | VC_1250_0  | 29  | 0.822  | 1          | 0.822  | 0 | 0 | 0 | 1 Ref      |
| MH837542 | Unassigned | Unassigned | Unassigned | 309_0   | Clustered           | 2   | VC_309_0   | 2   | 0.1813 | 0.95040252 | 0.1723 | 0 | 0 | 0 | 1 Ref      |
| MH837543 | Unassigned | Unassigned | Unassigned | 309_0   | Clustered           | 2   | VC_309_0   | 2   | 0.1813 | 0.95040252 | 0.1723 | 0 | 0 | 0 | 1 Ref      |
| MH837626 | Unassigned | Unassigned | Unassigned | 290_159 | Clustered/Singleton | 1   | VC_290_159 | 1   | 0      | 1          | 0      | 0 | 0 | 0 | 1 Ref      |
| MH844528 | Unassigned | Unassigned | Unassigned | 155_8   | Clustered           | 66  | VC_155_8   | 66  | 0.4537 | 1          | 0.4537 | 0 | 0 | 0 | 0.8182 Ref |
| MH844529 | Unassigned | Unassigned | Unassigned | 155_8   | Clustered           | 66  | VC_155_8   | 66  | 0.4537 | 1          | 0.4537 | 0 | 0 | 0 | 0.8182 Ref |
| MH844531 | Unassigned | Unassigned | Unassigned | 972_0   | Clustered           | 99  | VC_972_0   | 99  | 0.9113 | 1          | 0.9113 | 0 | 0 | 0 | 0.9928 Ref |
| MH844558 | Unassigned | Unassigned | Unassigned | 145_0   | Clustered           | 6   | VC_145_0   | 6   | 0.2581 | 0.86251824 | 0.2226 | 0 | 0 | 0 | 0.8667 Ref |
| MH853786 | Unassigned | Unassigned | Unassigned | 713_0   | Clustered           | 26  | VC_713_0   | 26  | 0.9358 | 1          | 0.9358 | 0 | 0 | 0 | 1 Ref      |
| MH853787 | Unassigned | Unassigned | Unassigned | 713_0   | Clustered           | 26  | VC_713_0   | 26  | 0.9358 | 1          | 0.9358 | 0 | 0 | 0 | 1 Ref      |
| MH853788 | Unassigned | Unassigned | Unassigned | 713_0   | Clustered           | 26  | VC_713_0   | 26  | 0.9358 | 1          | 0.9358 | 0 | 0 | 0 | 1 Ref      |
| MH880817 | Unassigned | Unassigned | Unassigned | 94_0    | Clustered           | 22  | VC_94_0    | 22  | 0.5602 | 1          | 0.5602 | 0 | 0 | 0 | 1 Ref      |
| MH884508 | Unassigned | Unassigned | Unassigned | 489_4   | Clustered/Singleton | 1   | VC_489_4   | 1   | 0      | 1          | 0      | 0 | 0 | 0 | 1 Ref      |
| MH884511 | Unassigned | Unassigned | Unassigned | 89_2    | Clustered/Singleton | 1   | VC_89_2    | 1   | 0      | 1          | 0      | 0 | 0 | 0 | 1 Ref      |
| MH884512 | Unassigned | Unassigned | Unassigned | 638_0   | Clustered           | 2   | VC_638_0   | 2   | 0.0686 | 0.56281647 | 0.0386 | 0 | 0 | 0 | 1 Ref      |
| MH884513 | Unassigned | Unassigned | Unassigned | 102_0   | Clustered           | 15  | VC_102_0   | 15  | 0.653  | 1          | 0.653  | 0 | 0 | 0 | 1 Ref      |
| MH884514 | Unassigned | Unassigned | Unassigned | 103_0   | Clustered           | 3   | VC_103_0   | 3   | 0.369  | 0.99763908 | 0.3682 | 0 | 0 | 0 | 1 Ref      |
| MH885472 | Unassigned | Unassigned | Unassigned | 113_0   | Clustered           | 91  | VC_113_0   | 91  | 0.9584 | 1          | 0.9584 | 0 | 0 | 0 | 1 Ref      |
| MH892350 | Unassigned | Unassigned | Unassigned | 262_0   | Clustered           | 14  | VC_262_0   | 14  | 0.2364 | 1          | 0.2364 | 0 | 0 | 0 | 1 Ref      |
| MH892351 | Unassigned | Unassigned | Unassigned | 258_0   | Clustered           | 121 | VC_258_0   | 121 | 0.7359 | 1          | 0.7359 | 0 | 0 | 0 | 0.9999 Ref |
| MH892352 | Unassigned | Unassigned | Unassigned | 258_0   | Clustered           | 121 | VC_258_0   | 121 | 0.7359 | 1          | 0.7359 | 0 | 0 | 0 | 0.9999 Ref |
| MH892353 | Unassigned | Unassigned | Unassigned | 258_0   | Clustered           | 121 | VC_258_0   | 121 | 0.7359 | 1          | 0.7359 | 0 | 0 | 0 | 0.9999 Ref |
| MH892354 | Unassigned | Unassigned | Unassigned | 258_0   | Clustered           | 121 | VC_258_0   | 121 | 0.7359 | 1          | 0.7359 | 0 | 0 | 0 | 0.9999 Ref |
| MH892355 | Unassigned | Unassigned | Unassigned | 261_0   | Clustered           | 13  | VC_261_0   | 13  | 0.2024 | 1          | 0.2024 | 0 | 0 | 0 | 1 Ref      |
| MH892356 | Unassigned | Unassigned | Unassigned | 258_0   | Clustered           | 121 | VC_258_0   | 121 | 0.7359 | 1          | 0.7359 | 0 | 0 | 0 | 0.9999 Ref |
| MH892357 | Unassigned | Unassigned | Unassigned | 258_0   | Clustered           | 121 | VC_258_0   | 121 | 0.7359 | 1          | 0.7359 | 0 | 0 | 0 | 0.9999 Ref |
| MH892358 | Unassigned | Unassigned | Unassigned | 258_0   | Clustered           | 121 | VC_258_0   | 121 | 0.7359 | 1          | 0.7359 | 0 | 0 | 0 | 0.9999 Ref |
| MH892359 | Unassigned | Unassigned | Unassigned | 258_0   | Clustered           | 121 | VC_258_0   | 121 | 0.7359 | 1          | 0.7359 | 0 | 0 | 0 | 0.9999 Ref |
| MH892360 | Unassigned | Unassigned | Unassigned | 258_0   | Clustered           | 121 | VC_258_0   | 121 | 0.7359 | 1          | 0.7359 | 0 | 0 | 0 | 0.9999 Ref |
| MH892361 | Unassigned | Unassigned | Unassigned | 258_0   | Clustered           | 121 | VC_258_0   | 121 | 0.7359 | 1          | 0.7359 | 0 | 0 | 0 | 0.9999 Ref |
| MH892362 | Unassigned | Unassigned | Unassigned | 260_0   | Clustered           | 46  | VC_260_0   | 46  | 0.5137 | 1          | 0.5137 | 0 | 0 | 0 | 1 Ref      |
| MH892363 | Unassigned | Unassigned | Unassigned | 260_0   | Clustered           | 46  | VC_260_0   | 46  | 0.5137 | 1          | 0.5137 | 0 | 0 | 0 | 1 Ref      |
| MH892364 | Unassigned | Unassigned | Unassigned | 260_0   | Clustered           | 46  | VC_260_0   | 46  | 0.5137 | 1          | 0.5137 | 0 | 0 | 0 | 1 Ref      |
| MH892365 | Unassigned | Unassigned | Unassigned | 262_0   | Clustered           | 14  | VC_262_0   | 14  | 0.2364 | 1          | 0.2364 | 0 | 0 | 0 | 1 Ref      |
| MH892366 | Unassigned | Unassigned | Unassigned | 260_0   | Clustered           | 46  | VC_260_0   | 46  | 0.5137 | 1          | 0.5137 | 0 | 0 | 0 | 1 Ref      |
| MH892367 | Unassigned | Unassigned | Unassigned | 261_0   | Clustered           | 13  | VC_261_0   | 13  | 0.2024 | 1          | 0.2024 | 0 | 0 | 0 | 1 Ref      |
| MH892368 | Unassigned | Unassigned | Unassigned | 262_0   | Clustered           | 14  | VC_262_0   | 14  | 0.2364 | 1          | 0.2364 | 0 | 0 | 0 | 1 Ref      |
| MH892369 | Unassigned | Unassigned | Unassigned | 262_0   | Clustered           | 14  | VC_262_0   | 14  | 0.2364 | 1          | 0.2364 | 0 | 0 | 0 | 1 Ref      |
| MH892370 | Unassigned | Unassigned | Unassigned | 262_0   | Clustered           | 14  | VC_262_0   | 14  | 0.2364 | 1          | 0.2364 | 0 | 0 | 0 | 1 Ref      |
| MH892371 | Unassigned | Unassigned | Unassigned | 262_0   | Clustered           | 14  | VC_262_0   | 14  | 0.2364 | 1          | 0.2364 | 0 | 0 | 0 | 1 Ref      |
| MH892372 | Unassigned | Unassigned | Unassigned | 262_0   | Clustered           | 14  | VC_262_0   | 14  | 0.2364 | 1          | 0.2364 | 0 | 0 | 0 | 1 Ref      |
| MH892373 | Unassigned | Unassigned | Unassigned | 261_0   | Clustered           | 13  | VC_261_0   | 13  | 0.2024 | 1          | 0.2024 | 0 | 0 | 0 | 1 Ref      |
| MH892374 | Unassigned | Unassigned | Unassigned | 262_0   | Clustered           | 14  | VC_262_0   | 14  | 0.2364 | 1          | 0.2364 | 0 | 0 | 0 | 1 Ref      |
| MH892375 | Unassigned | Unassigned | Unassigned | 258_0   | Clustered           | 121 | VC_258_0   | 121 | 0.7359 | 1          | 0.7359 | 0 | 0 | 0 | 0.9999 Ref |
| MH892376 | Unassigned | Unassigned | Unassigned | 260_0   | Clustered           | 46  | VC_260_0   | 46  | 0.5137 | 1          | 0.5137 | 0 | 0 | 0 | 1 Ref      |
| MH892377 | Unassigned | Unassigned | Unassigned | 258_0   | Clustered           | 121 | VC_258_0   | 121 | 0.7359 | 1          | 0.7359 | 0 | 0 | 0 | 0.9999 Ref |
| MH892378 | Unassigned | Unassigned | Unassigned | 258_0   | Clustered           | 121 | VC_258_0   | 121 | 0.7359 | 1          | 0.7359 | 0 | 0 | 0 | 0.9999 Ref |
| MH892379 | Unassigned | Unassigned | Unassigned | 258_0   | Clustered           | 121 | VC_258_0   | 121 | 0.7359 | 1          | 0.7359 | 0 | 0 | 0 | 0.9999 Ref |
| MH892380 | Unassigned | Unassigned | Unassigned | 258_0   | Clustered           | 121 | VC_258_0   | 121 | 0.7359 | 1          | 0.7359 | 0 | 0 | 0 | 0.9999 Ref |
| MH892381 | Unassigned | Unassigned | Unassigned | 258_0   | Clustered           | 121 | VC_258_0   | 121 | 0.7359 | 1          | 0.7359 | 0 | 0 | 0 | 0.9999 Ref |
| MH892382 | Unassigned | Unassigned | Unassigned | 258_0   | Clustered           | 121 | VC_258_0   | 121 | 0.7359 | 1          | 0.7359 | 0 | 0 | 0 | 0.9999 Ref |
| MH892383 | Unassigned | Unassigned | Unassigned | 260_0   | Clustered           | 46  | VC_260_0   | 46  | 0.5137 | 1          | 0.5137 | 0 | 0 | 0 | 1 Ref      |
| MH892384 | Unassigned | Unassigned | Unassigned | 260_0   | Clustered           | 46  | VC_260_0   | 46  | 0.5137 | 1          | 0.5137 | 0 | 0 | 0 | 1 Ref      |
| MH892385 | Unassigned | Unassigned | Unassigned | 260_0   | Clustered           | 46  | VC_260_0   | 46  | 0.5137 | 1          | 0.5137 | 0 | 0 | 0 | 1 Ref      |
| MH899585 | Unassigned | Unassigned | Unassigned | 802_0   | Clustered           | 8   | VC_802_0   | 8   | 0.5141 | 1          | 0.5141 | 0 | 0 | 0 | 1 Ref      |
| MH910036 | Unassigned | Unassigned | Unassigned | 1075_0  | Clustered           | 11  | VC_1075_0  | 11  | 0.6562 | 1          | 0.6562 | 0 | 0 | 0 | 0.9273 Ref |



|          |            |            |            |        |                     |              |     |        |            |        |   |   |   |        |     |
|----------|------------|------------|------------|--------|---------------------|--------------|-----|--------|------------|--------|---|---|---|--------|-----|
| MHP10037 | Unassigned | Unassigned | Unassigned | 1075_0 | Clustered           | 11 VC_1075_0 | 11  | 0.6562 | 1          | 0.6562 | 0 | 0 | 0 | 0.9273 | Ref |
| MHP10038 | Unassigned | Unassigned | Unassigned | 244_3  | Clustered           | 8 VC_244_3   | 8   | 0.1086 | 1          | 0.1086 | 0 | 0 | 0 | 1      | Ref |
| MHP10039 | Unassigned | Unassigned | Unassigned | 244_3  | Clustered           | 8 VC_244_3   | 8   | 0.1086 | 1          | 0.1086 | 0 | 0 | 0 | 1      | Ref |
| MHP10040 | Unassigned | Unassigned | Unassigned | 579_33 | Clustered/Singleton | 1 VC_579_33  | 1   | 0      | 1          | 0      | 0 | 0 | 0 | 1      | Ref |
| MHP10041 | Unassigned | Unassigned | Unassigned | 1075_0 | Clustered           | 11 VC_1075_0 | 11  | 0.6562 | 1          | 0.6562 | 0 | 0 | 0 | 0.9273 | Ref |
| MHP10042 | Unassigned | Unassigned | Unassigned | 244_3  | Clustered           | 8 VC_244_3   | 8   | 0.1086 | 1          | 0.1086 | 0 | 0 | 0 | 1      | Ref |
| MHP17278 | Unassigned | Unassigned | Unassigned | 595_0  | Clustered           | 35 VC_595_0  | 35  | 0.8809 | 1          | 0.8809 | 0 | 0 | 0 | 1      | Ref |
| MHP20362 | Unassigned | Unassigned | Unassigned | 341_0  | Clustered           | 27 VC_341_0  | 27  | 0.5058 | 1          | 0.5058 | 0 | 0 | 0 | 0.8661 | Ref |
| MHP20639 | Unassigned | Unassigned | Unassigned | 674_7  | Clustered           | 3 VC_674_7   | 3   | 0.0163 | 0.99856944 | 0.0163 | 0 | 0 | 0 | 1      | Ref |
| MHP20640 | Unassigned | Unassigned | Unassigned | 674_7  | Clustered           | 3 VC_674_7   | 3   | 0.0163 | 0.99856944 | 0.0163 | 0 | 0 | 0 | 1      | Ref |
| MHP25090 | Unassigned | Unassigned | Unassigned | 911_0  | Clustered           | 20 VC_911_0  | 20  | 0.9915 | 1          | 0.9915 | 0 | 0 | 0 | 1      | Ref |
| MHP25091 | Unassigned | Unassigned | Unassigned | 935_2  | Clustered           | 7 VC_935_2   | 7   | 0.2837 | 1          | 0.2837 | 0 | 0 | 0 | 1      | Ref |
| MHP25092 | Unassigned | Unassigned | Unassigned | 1091_1 | Clustered           | 29 VC_1091_1 | 29  | 0.4856 | 1          | 0.4856 | 0 | 0 | 0 | 0.9581 | Ref |
| MHP25094 | Unassigned | Unassigned | Unassigned | 1008_0 | Clustered           | 6 VC_1008_0  | 6   | 0.2856 | 1          | 0.2856 | 0 | 0 | 0 | 1      | Ref |
| MHP26055 | Unassigned | Unassigned | Unassigned | 539_0  | Clustered           | 37 VC_539_0  | 37  | 0.911  | 1          | 0.911  | 0 | 0 | 0 | 1      | Ref |
| MHP26056 | Unassigned | Unassigned | Unassigned | 790_0  | Clustered           | 8 VC_790_0   | 8   | 0.6981 | 1          | 0.6981 | 0 | 0 | 0 | 1      | Ref |
| MHP26057 | Unassigned | Unassigned | Unassigned | 790_0  | Clustered           | 8 VC_790_0   | 8   | 0.6981 | 1          | 0.6981 | 0 | 0 | 0 | 1      | Ref |
| MHP26058 | Unassigned | Unassigned | Unassigned | 241_0  | Clustered           | 21 VC_241_0  | 21  | 0.8342 | 1          | 0.8342 | 0 | 0 | 0 | 1      | Ref |
| MHP26059 | Unassigned | Unassigned | Unassigned | 588_0  | Clustered           | 8 VC_588_0   | 8   | 0.5695 | 1          | 0.5695 | 0 | 0 | 0 | 1      | Ref |
| MHP26060 | Unassigned | Unassigned | Unassigned | 384_1  | Clustered           | 11 VC_384_1  | 11  | 0.0378 | 1          | 0.0378 | 0 | 0 | 0 | 0.8545 | Ref |
| MHP26061 | Unassigned | Unassigned | Unassigned | 1243_0 | Clustered           | 8 VC_1243_0  | 8   | 0.8266 | 1          | 0.8266 | 0 | 0 | 0 | 1      | Ref |
| MHP26062 | Unassigned | Unassigned | Unassigned | 577_0  | Clustered           | 21 VC_577_0  | 21  | 0.9908 | 1          | 0.9908 | 0 | 0 | 0 | 1      | Ref |
| MHP29319 | Unassigned | Unassigned | Unassigned | 134_1  | Clustered           | 4 VC_134_1   | 4   | 0.0354 | 0.99998777 | 0.0354 | 0 | 0 | 0 | 1      | Ref |
| MHP31003 | Unassigned | Unassigned | Unassigned | 1095_0 | Clustered           | 12 VC_1095_0 | 12  | 0.2819 | 0.99837092 | 0.2814 | 0 | 0 | 0 | 1      | Ref |
| MHP31004 | Unassigned | Unassigned | Unassigned | 1119_0 | Clustered           | 48 VC_1119_0 | 48  | 0.852  | 1          | 0.852  | 0 | 0 | 0 | 1      | Ref |
| MHP37457 | Unassigned | Unassigned | Unassigned | 260_0  | Clustered           | 46 VC_260_0  | 46  | 0.5137 | 1          | 0.5137 | 0 | 0 | 0 | 1      | Ref |
| MHP37458 | Unassigned | Unassigned | Unassigned | 258_0  | Clustered           | 121 VC_258_0 | 121 | 0.7359 | 1          | 0.7359 | 0 | 0 | 0 | 0.9999 | Ref |
| MHP37459 | Unassigned | Unassigned | Unassigned | 258_0  | Clustered           | 121 VC_258_0 | 121 | 0.7359 | 1          | 0.7359 | 0 | 0 | 0 | 0.9999 | Ref |
| MHP37460 | Unassigned | Unassigned | Unassigned | 260_0  | Clustered           | 46 VC_260_0  | 46  | 0.5137 | 1          | 0.5137 | 0 | 0 | 0 | 1      | Ref |
| MHP37461 | Unassigned | Unassigned | Unassigned | 258_0  | Clustered           | 121 VC_258_0 | 121 | 0.7359 | 1          | 0.7359 | 0 | 0 | 0 | 0.9999 | Ref |
| MHP37462 | Unassigned | Unassigned | Unassigned | 258_0  | Clustered           | 121 VC_258_0 | 121 | 0.7359 | 1          | 0.7359 | 0 | 0 | 0 | 0.9999 | Ref |
| MHP37463 | Unassigned | Unassigned | Unassigned | 260_0  | Clustered           | 46 VC_260_0  | 46  | 0.5137 | 1          | 0.5137 | 0 | 0 | 0 | 1      | Ref |
| MHP37464 | Unassigned | Unassigned | Unassigned | 260_0  | Clustered           | 46 VC_260_0  | 46  | 0.5137 | 1          | 0.5137 | 0 | 0 | 0 | 1      | Ref |
| MHP37465 | Unassigned | Unassigned | Unassigned | 258_0  | Clustered           | 121 VC_258_0 | 121 | 0.7359 | 1          | 0.7359 | 0 | 0 | 0 | 0.9999 | Ref |
| MHP37466 | Unassigned | Unassigned | Unassigned | 258_0  | Clustered           | 121 VC_258_0 | 121 | 0.7359 | 1          | 0.7359 | 0 | 0 | 0 | 0.9999 | Ref |
| MHP37467 | Unassigned | Unassigned | Unassigned | 258_0  | Clustered           | 121 VC_258_0 | 121 | 0.7359 | 1          | 0.7359 | 0 | 0 | 0 | 0.9999 | Ref |
| MHP37468 | Unassigned | Unassigned | Unassigned | 258_0  | Clustered           | 121 VC_258_0 | 121 | 0.7359 | 1          | 0.7359 | 0 | 0 | 0 | 0.9999 | Ref |
| MHP37469 | Unassigned | Unassigned | Unassigned | 258_0  | Clustered           | 121 VC_258_0 | 121 | 0.7359 | 1          | 0.7359 | 0 | 0 | 0 | 0.9999 | Ref |
| MHP37470 | Unassigned | Unassigned | Unassigned | 258_0  | Clustered           | 121 VC_258_0 | 121 | 0.7359 | 1          | 0.7359 | 0 | 0 | 0 | 0.9999 | Ref |
| MHP37471 | Unassigned | Unassigned | Unassigned | 258_0  | Clustered           | 121 VC_258_0 | 121 | 0.7359 | 1          | 0.7359 | 0 | 0 | 0 | 0.9999 | Ref |
| MHP37472 | Unassigned | Unassigned | Unassigned | 258_0  | Clustered           | 121 VC_258_0 | 121 | 0.7359 | 1          | 0.7359 | 0 | 0 | 0 | 0.9999 | Ref |
| MHP37473 | Unassigned | Unassigned | Unassigned | 260_0  | Clustered           | 46 VC_260_0  | 46  | 0.5137 | 1          | 0.5137 | 0 | 0 | 0 | 1      | Ref |
| MHP37474 | Unassigned | Unassigned | Unassigned | 258_0  | Clustered           | 121 VC_258_0 | 121 | 0.7359 | 1          | 0.7359 | 0 | 0 | 0 | 0.9999 | Ref |
| MHP37475 | Unassigned | Unassigned | Unassigned | 260_0  | Clustered           | 46 VC_260_0  | 46  | 0.5137 | 1          | 0.5137 | 0 | 0 | 0 | 1      | Ref |
| MHP37476 | Unassigned | Unassigned | Unassigned | 260_0  | Clustered           | 46 VC_260_0  | 46  | 0.5137 | 1          | 0.5137 | 0 | 0 | 0 | 1      | Ref |
| MHP37477 | Unassigned | Unassigned | Unassigned | 258_0  | Clustered           | 121 VC_258_0 | 121 | 0.7359 | 1          | 0.7359 | 0 | 0 | 0 | 0.9999 | Ref |
| MHP37478 | Unassigned | Unassigned | Unassigned | 260_0  | Clustered           | 46 VC_260_0  | 46  | 0.5137 | 1          | 0.5137 | 0 | 0 | 0 | 1      | Ref |
| MHP37479 | Unassigned | Unassigned | Unassigned | 260_0  | Clustered           | 46 VC_260_0  | 46  | 0.5137 | 1          | 0.5137 | 0 | 0 | 0 | 1      | Ref |
| MHP37480 | Unassigned | Unassigned | Unassigned | 258_0  | Clustered           | 121 VC_258_0 | 121 | 0.7359 | 1          | 0.7359 | 0 | 0 | 0 | 0.9999 | Ref |
| MHP37481 | Unassigned | Unassigned | Unassigned | 258_0  | Clustered           | 121 VC_258_0 | 121 | 0.7359 | 1          | 0.7359 | 0 | 0 | 0 | 0.9999 | Ref |
| MHP37482 | Unassigned | Unassigned | Unassigned | 258_0  | Clustered           | 121 VC_258_0 | 121 | 0.7359 | 1          | 0.7359 | 0 | 0 | 0 | 0.9999 | Ref |
| MHP37483 | Unassigned | Unassigned | Unassigned | 258_0  | Clustered           | 121 VC_258_0 | 121 | 0.7359 | 1          | 0.7359 | 0 | 0 | 0 | 0.9999 | Ref |
| MHP37484 | Unassigned | Unassigned | Unassigned | 260_0  | Clustered           | 46 VC_260_0  | 46  | 0.5137 | 1          | 0.5137 | 0 | 0 | 0 | 1      | Ref |
| MHP37485 | Unassigned | Unassigned | Unassigned | 258_0  | Clustered           | 121 VC_258_0 | 121 | 0.7359 | 1          | 0.7359 | 0 | 0 | 0 | 0.9999 | Ref |
| MHP37486 | Unassigned | Unassigned | Unassigned | 258_0  | Clustered           | 121 VC_258_0 | 121 | 0.7359 | 1          | 0.7359 | 0 | 0 | 0 | 0.9999 | Ref |
| MHP37487 | Unassigned | Unassigned | Unassigned | 258_0  | Clustered           | 121 VC_258_0 | 121 | 0.7359 | 1          | 0.7359 | 0 | 0 | 0 | 0.9999 | Ref |
| MHP37488 | Unassigned | Unassigned | Unassigned | 258_0  | Clustered           | 121 VC_258_0 | 121 | 0.7359 | 1          | 0.7359 | 0 | 0 | 0 | 0.9999 | Ref |
| MHP37489 | Unassigned | Unassigned | Unassigned | 258_0  | Clustered           | 121 VC_258_0 | 121 | 0.7359 | 1          | 0.7359 | 0 | 0 | 0 | 0.9999 | Ref |
| MHP37490 | Unassigned | Unassigned | Unassigned | 258_0  | Clustered           | 121 VC_258_0 | 121 | 0.7359 | 1          | 0.7359 | 0 | 0 | 0 | 0.9999 | Ref |
| MHP37491 | Unassigned | Unassigned | Unassigned | 258_0  | Clustered           | 121 VC_258_0 | 121 | 0.7359 | 1          | 0.7359 | 0 | 0 | 0 | 0.9999 | Ref |
| MHP37492 | Unassigned | Unassigned | Unassigned | 258_0  | Clustered           | 121 VC_258_0 | 121 | 0.7359 | 1          | 0.7359 | 0 | 0 | 0 | 0.9999 | Ref |
| MHP37493 | Unassigned | Unassigned | Unassigned | 258_0  | Clustered           | 121 VC_258_0 | 121 | 0.7359 | 1          | 0.7359 | 0 | 0 | 0 | 0.9999 | Ref |
| MHP37494 | Unassigned | Unassigned | Unassigned | 260_0  | Clustered           | 46 VC_260_0  | 46  | 0.5137 | 1          | 0.5137 | 0 | 0 | 0 | 1      | Ref |
| MHP37495 | Unassigned | Unassigned | Unassigned | 258_0  | Clustered           | 121 VC_258_0 | 121 | 0.7359 | 1          | 0.7359 | 0 | 0 | 0 | 0.9999 | Ref |
| MHP37496 | Unassigned | Unassigned | Unassigned | 258_0  | Clustered           | 121 VC_258_0 | 121 | 0.7359 | 1          | 0.7359 | 0 | 0 | 0 | 0.9999 | Ref |
| MHP37497 | Unassigned | Unassigned | Unassigned | 258_0  | Clustered           | 121 VC_258_0 | 121 | 0.7359 | 1          | 0.7359 | 0 | 0 | 0 | 0.9999 | Ref |
| MHP37498 | Unassigned | Unassigned | Unassigned | 260_0  | Clustered           | 46 VC_260_0  | 46  | 0.5137 | 1          | 0.5137 | 0 | 0 | 0 | 1      | Ref |
| MHP37499 | Unassigned | Unassigned | Unassigned | 258_0  | Clustered           | 121 VC_258_0 | 121 | 0.7359 | 1          | 0.7359 | 0 | 0 | 0 | 0.9999 | Ref |
| MHP37500 | Unassigned | Unassigned | Unassigned | 258_0  | Clustered           | 121 VC_258_0 | 121 | 0.7359 | 1          | 0.7359 | 0 | 0 | 0 | 0.9999 | Ref |
| MHP37501 | Unassigned | Unassigned | Unassigned | 258_0  | Clustered           | 121 VC_258_0 | 121 | 0.7359 | 1          | 0.7359 | 0 | 0 | 0 | 0.9999 | Ref |
| MHP37502 | Unassigned | Unassigned | Unassigned | 260_0  | Clustered           | 46 VC_260_0  | 46  | 0.5137 | 1          | 0.5137 | 0 | 0 | 0 | 1      | Ref |
| MHP37503 | Unassigned | Unassigned | Unassigned | 260_0  | Clustered           | 46 VC_260_0  | 46  | 0.5137 | 1          | 0.5137 | 0 | 0 | 0 | 1      | Ref |
| MHP37504 | Unassigned | Unassigned | Unassigned | 258_0  | Clustered           | 121 VC_258_0 | 121 | 0.7359 | 1          | 0.7359 | 0 | 0 | 0 | 0.9999 | Ref |
| MHP37505 | Unassigned | Unassigned | Unassigned | 260_0  | Clustered           | 46 VC_260_0  | 46  | 0.5137 | 1          | 0.5137 | 0 | 0 | 0 | 1      | Ref |
| MHP37506 | Unassigned | Unassigned | Unassigned | 258_0  | Clustered           | 121 VC_258_0 | 121 | 0.7359 | 1          | 0.7359 | 0 | 0 | 0 | 0.9999 | Ref |
| MHP37507 | Unassigned | Unassigned | Unassigned | 260_0  | Clustered           | 46 VC_260_0  | 46  | 0.5137 | 1          | 0.5137 | 0 | 0 | 0 | 1      | Ref |
| MHP37508 | Unassigned | Unassigned | Unassigned | 258_0  | Clustered           | 121 VC_258_0 | 121 | 0.7359 | 1          | 0.7359 | 0 | 0 | 0 | 0.9999 | Ref |
| MHP37509 | Unassigned | Unassigned | Unassigned | 260_0  | Clustered           | 46 VC_260_0  | 46  | 0.5137 | 1          | 0.5137 | 0 | 0 | 0 | 1      | Ref |
| MHP37510 | Unassigned | Unassigned | Unassigned | 260_0  | Clustered           | 46 VC_260_0  | 46  | 0.5137 | 1          | 0.5137 | 0 | 0 | 0 | 1      | Ref |
| MHP37511 | Unassigned | Unassigned | Unassigned | 260_0  | Clustered           | 46 VC_260_0  | 46  | 0.5137 | 1          | 0.5137 | 0 | 0 | 0 | 1      | Ref |
| MHP39157 | Unassigned | Unassigned | Unassigned | 1428_0 | Clustered           | 2 VC_1428_0  | 2   | 0.8102 | 0.72985431 | 0.5914 | 0 | 0 | 0 | 1      | Ref |



|          |            |            |            |         |                     |              |     |        |            |        |   |   |   |        |       |
|----------|------------|------------|------------|---------|---------------------|--------------|-----|--------|------------|--------|---|---|---|--------|-------|
| MH940212 | Unassigned | Unassigned | Unassigned | 135_22  | Clustered           | 13 VC_135_22 | 13  | 0.0795 | 1          | 0.0795 | 0 | 0 | 0 | 0.8205 | Ref   |
| MH972260 | Unassigned | Unassigned | Unassigned | 98_0    | Clustered           | 30 VC_98_0   | 30  | 0.7175 | 1          | 0.7175 | 0 | 0 | 0 |        | 1 Ref |
| MH973661 | Unassigned | Unassigned | Unassigned | 258_0   | Clustered           | 121 VC_258_0 | 121 | 0.7359 | 1          | 0.7359 | 0 | 0 | 0 | 0.9999 | Ref   |
| MH973662 | Unassigned | Unassigned | Unassigned | 258_0   | Clustered           | 121 VC_258_0 | 121 | 0.7359 | 1          | 0.7359 | 0 | 0 | 0 | 0.9999 | Ref   |
| MH973663 | Unassigned | Unassigned | Unassigned | 261_0   | Clustered           | 13 VC_261_0  | 13  | 0.2024 | 1          | 0.2024 | 0 | 0 | 0 |        | 1 Ref |
| MH973725 | Unassigned | Unassigned | Unassigned | 486_0   | Clustered           | 47 VC_486_0  | 47  | 0.9022 | 1          | 0.9022 | 0 | 0 | 0 |        | 1 Ref |
| MH976506 | Unassigned | Unassigned | Unassigned | 1136_0  | Clustered           | 40 VC_1136_0 | 40  | 0.8746 | 1          | 0.8746 | 0 | 0 | 0 |        | 1 Ref |
| MH976507 | Unassigned | Unassigned | Unassigned | 1136_0  | Clustered           | 40 VC_1136_0 | 40  | 0.8746 | 1          | 0.8746 | 0 | 0 | 0 |        | 1 Ref |
| MH976508 | Unassigned | Unassigned | Unassigned | 1136_0  | Clustered           | 40 VC_1136_0 | 40  | 0.8746 | 1          | 0.8746 | 0 | 0 | 0 |        | 1 Ref |
| MH976509 | Unassigned | Unassigned | Unassigned | 1136_0  | Clustered           | 40 VC_1136_0 | 40  | 0.8746 | 1          | 0.8746 | 0 | 0 | 0 |        | 1 Ref |
| MH976510 | Unassigned | Unassigned | Unassigned | 1136_0  | Clustered           | 40 VC_1136_0 | 40  | 0.8746 | 1          | 0.8746 | 0 | 0 | 0 |        | 1 Ref |
| MH976511 | Unassigned | Unassigned | Unassigned | 1136_0  | Clustered           | 40 VC_1136_0 | 40  | 0.8746 | 1          | 0.8746 | 0 | 0 | 0 |        | 1 Ref |
| MH976512 | Unassigned | Unassigned | Unassigned | 1136_0  | Clustered           | 40 VC_1136_0 | 40  | 0.8746 | 1          | 0.8746 | 0 | 0 | 0 |        | 1 Ref |
| MH976513 | Unassigned | Unassigned | Unassigned | 1136_0  | Clustered           | 40 VC_1136_0 | 40  | 0.8746 | 1          | 0.8746 | 0 | 0 | 0 |        | 1 Ref |
| MH976514 | Unassigned | Unassigned | Unassigned | 1136_0  | Clustered           | 40 VC_1136_0 | 40  | 0.8746 | 1          | 0.8746 | 0 | 0 | 0 |        | 1 Ref |
| MH976515 | Unassigned | Unassigned | Unassigned | 919_1   | Clustered           | 4 VC_919_1   | 4   | 0.4515 | 0.99998463 | 0.4515 | 0 | 0 | 0 |        | 1 Ref |
| MH976516 | Unassigned | Unassigned | Unassigned | 790_0   | Clustered           | 8 VC_790_0   | 8   | 0.6981 | 1          | 0.6981 | 0 | 0 | 0 |        | 1 Ref |
| MH976517 | Unassigned | Unassigned | Unassigned | 531_0   | Clustered           | 32 VC_531_0  | 32  | 0.6859 | 1          | 0.6859 | 0 | 0 | 0 |        | 1 Ref |
| MH976518 | Unassigned | Unassigned | Unassigned | 1136_0  | Clustered           | 40 VC_1136_0 | 40  | 0.8746 | 1          | 0.8746 | 0 | 0 | 0 |        | 1 Ref |
| MH976519 | Unassigned | Unassigned | Unassigned | 1136_0  | Clustered           | 40 VC_1136_0 | 40  | 0.8746 | 1          | 0.8746 | 0 | 0 | 0 |        | 1 Ref |
| MH979674 | Unassigned | Unassigned | Unassigned | 434_0   | Clustered           | 45 VC_434_0  | 45  | 0.9479 | 1          | 0.9479 | 0 | 0 | 0 |        | 1 Ref |
| MH983004 | Unassigned | Unassigned | Unassigned | 279_0   | Clustered           | 11 VC_279_0  | 11  | 0.4839 | 1          | 0.4839 | 0 | 0 | 0 | 0.8727 | Ref   |
| MH992121 | Unassigned | Unassigned | Unassigned | 290_188 | Clustered/Singleton | 1 VC_290_188 | 1   | 0      | 1          | 0      | 0 | 0 | 0 |        | 1 Ref |
| MH992122 | Unassigned | Unassigned | Unassigned | 293_10  | Clustered           | 9 VC_293_10  | 9   | 0.0615 | 0.99999884 | 0.0615 | 0 | 0 | 0 | 0.6667 | Ref   |
| MH992123 | Unassigned | Unassigned | Unassigned | 801_0   | Clustered           | 37 VC_801_0  | 37  | 0.5672 | 1          | 0.5672 | 0 | 0 | 0 |        | 1 Ref |
| MH992131 | Unassigned | Unassigned | Unassigned | 829_0   | Clustered           | 4 VC_829_0   | 4   | 0.9064 | 0.99761409 | 0.9042 | 0 | 0 | 0 |        | 1 Ref |
| MH992154 | Unassigned | Unassigned | Unassigned | 1429_0  | Clustered           | 3 VC_1429_0  | 3   | 1      | 1          | 1      | 0 | 0 | 0 |        | 1 Ref |
| MH992155 | Unassigned | Unassigned | Unassigned | 1430_0  | Clustered           | 3 VC_1430_0  | 3   | 1      | 1          | 1      | 0 | 0 | 0 |        | 1 Ref |
| MH992156 | Unassigned | Unassigned | Unassigned | 1028_0  | Clustered           | 69 VC_1028_0 | 69  | 0.8547 | 1          | 0.8547 | 0 | 0 | 0 |        | 1 Ref |
| MH992157 | Unassigned | Unassigned | Unassigned | 206_0   | Clustered           | 28 VC_206_0  | 28  | 0.2427 | 0.99971175 | 0.2426 | 0 | 0 | 0 |        | 1 Ref |
| MH992158 | Unassigned | Unassigned | Unassigned | 338_0   | Clustered           | 12 VC_338_0  | 12  | 0.8919 | 1          | 0.8919 | 0 | 0 | 0 |        | 1 Ref |
| MH992159 | Unassigned | Unassigned | Unassigned | 1402_0  | Clustered           | 7 VC_1402_0  | 7   | 0.9174 | 0.99772305 | 0.9153 | 0 | 0 | 0 |        | 1 Ref |
| MH992160 | Unassigned | Unassigned | Unassigned | 338_0   | Clustered           | 12 VC_338_0  | 12  | 0.8919 | 1          | 0.8919 | 0 | 0 | 0 |        | 1 Ref |
| MH992161 | Unassigned | Unassigned | Unassigned | 1028_0  | Clustered           | 69 VC_1028_0 | 69  | 0.8547 | 1          | 0.8547 | 0 | 0 | 0 |        | 1 Ref |
| MH992163 | Unassigned | Unassigned | Unassigned | 1119_0  | Clustered           | 48 VC_1119_0 | 48  | 0.852  | 1          | 0.852  | 0 | 0 | 0 |        | 1 Ref |
| MH992164 | Unassigned | Unassigned | Unassigned | 1119_0  | Clustered           | 48 VC_1119_0 | 48  | 0.852  | 1          | 0.852  | 0 | 0 | 0 |        | 1 Ref |
| MH992165 | Unassigned | Unassigned | Unassigned | 1108_0  | Clustered           | 52 VC_1108_0 | 52  | 0.7674 | 1          | 0.7674 | 0 | 0 | 0 |        | 1 Ref |
| MH992167 | Unassigned | Unassigned | Unassigned | 1432_0  | Clustered           | 2 VC_1432_0  | 2   | 1      | 1          | 1      | 0 | 0 | 0 |        | 1 Ref |
| MH992169 | Unassigned | Unassigned | Unassigned | 1030_0  | Clustered/Singleton | 1 VC_1030_0  | 1   | 0      | 1          | 0      | 0 | 0 | 0 |        | 1 Ref |
| MH992170 | Unassigned | Unassigned | Unassigned | 1101_0  | Clustered           | 3 VC_1101_0  | 3   | 0.3918 | 0.9839946  | 0.3856 | 0 | 0 | 0 |        | 1 Ref |
| MH992171 | Unassigned | Unassigned | Unassigned | 1433_0  | Clustered           | 2 VC_1433_0  | 2   | 1      | 1          | 1      | 0 | 0 | 0 |        | 1 Ref |
| MH992173 | Unassigned | Unassigned | Unassigned | 1388_0  | Clustered           | 4 VC_1388_0  | 4   | 0.6008 | 0.54407361 | 0.3269 | 0 | 0 | 0 |        | 1 Ref |
| MH992174 | Unassigned | Unassigned | Unassigned | 206_0   | Clustered           | 28 VC_206_0  | 28  | 0.2427 | 0.99971175 | 0.2426 | 0 | 0 | 0 |        | 1 Ref |
| MH992175 | Unassigned | Unassigned | Unassigned | 1402_0  | Clustered           | 7 VC_1402_0  | 7   | 0.9174 | 0.99772305 | 0.9153 | 0 | 0 | 0 |        | 1 Ref |
| MH992177 | Unassigned | Unassigned | Unassigned | 338_0   | Clustered           | 12 VC_338_0  | 12  | 0.8919 | 1          | 0.8919 | 0 | 0 | 0 |        | 1 Ref |
| MH992178 | Unassigned | Unassigned | Unassigned | 338_0   | Clustered           | 12 VC_338_0  | 12  | 0.8919 | 1          | 0.8919 | 0 | 0 | 0 |        | 1 Ref |
| MH992180 | Unassigned | Unassigned | Unassigned | 1104_0  | Clustered           | 44 VC_1104_0 | 44  | 0.9574 | 0.72818579 | 0.6972 | 0 | 0 | 0 |        | 1 Ref |
| MH992181 | Unassigned | Unassigned | Unassigned | 208_0   | Clustered/Singleton | 1 VC_208_0   | 1   | 0      | 1          | 0      | 0 | 0 | 0 |        | 1 Ref |
| MH992182 | Unassigned | Unassigned | Unassigned | 206_0   | Clustered           | 28 VC_206_0  | 28  | 0.2427 | 0.99971175 | 0.2426 | 0 | 0 | 0 |        | 1 Ref |
| MH992184 | Unassigned | Unassigned | Unassigned | 1028_0  | Clustered           | 69 VC_1028_0 | 69  | 0.8547 | 1          | 0.8547 | 0 | 0 | 0 |        | 1 Ref |
| MH992185 | Unassigned | Unassigned | Unassigned | 1028_0  | Clustered           | 69 VC_1028_0 | 69  | 0.8547 | 1          | 0.8547 | 0 | 0 | 0 |        | 1 Ref |
| MH992189 | Unassigned | Unassigned | Unassigned | 338_0   | Clustered           | 12 VC_338_0  | 12  | 0.8919 | 1          | 0.8919 | 0 | 0 | 0 |        | 1 Ref |
| MH992191 | Unassigned | Unassigned | Unassigned | 338_0   | Clustered           | 12 VC_338_0  | 12  | 0.8919 | 1          | 0.8919 | 0 | 0 | 0 |        | 1 Ref |
| MH992192 | Unassigned | Unassigned | Unassigned | 1119_0  | Clustered           | 48 VC_1119_0 | 48  | 0.852  | 1          | 0.852  | 0 | 0 | 0 |        | 1 Ref |
| MH992193 | Unassigned | Unassigned | Unassigned | 1101_0  | Clustered           | 3 VC_1101_0  | 3   | 0.3918 | 0.9839946  | 0.3856 | 0 | 0 | 0 |        | 1 Ref |
| MH992194 | Unassigned | Unassigned | Unassigned | 338_0   | Clustered           | 12 VC_338_0  | 12  | 0.8919 | 1          | 0.8919 | 0 | 0 | 0 |        | 1 Ref |
| MH992195 | Unassigned | Unassigned | Unassigned | 411_0   | Clustered           | 48 VC_411_0  | 48  | 0.4808 | 1          | 0.4808 | 0 | 0 | 0 |        | 1 Ref |
| MH992196 | Unassigned | Unassigned | Unassigned | 1430_0  | Clustered           | 3 VC_1430_0  | 3   | 1      | 1          | 1      | 0 | 0 | 0 |        | 1 Ref |
| MH992197 | Unassigned | Unassigned | Unassigned | 338_0   | Clustered           | 12 VC_338_0  | 12  | 0.8919 | 1          | 0.8919 | 0 | 0 | 0 |        | 1 Ref |
| MH992199 | Unassigned | Unassigned | Unassigned | 1119_0  | Clustered           | 48 VC_1119_0 | 48  | 0.852  | 1          | 0.852  | 0 | 0 | 0 |        | 1 Ref |
| MH992200 | Unassigned | Unassigned | Unassigned | 1402_0  | Clustered           | 7 VC_1402_0  | 7   | 0.9174 | 0.99772305 | 0.9153 | 0 | 0 | 0 |        | 1 Ref |
| MH992202 | Unassigned | Unassigned | Unassigned | 1119_0  | Clustered           | 48 VC_1119_0 | 48  | 0.852  | 1          | 0.852  | 0 | 0 | 0 |        | 1 Ref |
| MH992205 | Unassigned | Unassigned | Unassigned | 1430_0  | Clustered           | 3 VC_1430_0  | 3   | 1      | 1          | 1      | 0 | 0 | 0 |        | 1 Ref |
| MH992206 | Unassigned | Unassigned | Unassigned | 1119_0  | Clustered           | 48 VC_1119_0 | 48  | 0.852  | 1          | 0.852  | 0 | 0 | 0 |        | 1 Ref |
| MH992207 | Unassigned | Unassigned | Unassigned | 338_0   | Clustered           | 12 VC_338_0  | 12  | 0.8919 | 1          | 0.8919 | 0 | 0 | 0 |        | 1 Ref |
| MH992208 | Unassigned | Unassigned | Unassigned | 1119_0  | Clustered           | 48 VC_1119_0 | 48  | 0.852  | 1          | 0.852  | 0 | 0 | 0 |        | 1 Ref |
| MH992210 | Unassigned | Unassigned | Unassigned | 206_0   | Clustered           | 28 VC_206_0  | 28  | 0.2427 | 0.99971175 | 0.2426 | 0 | 0 | 0 |        | 1 Ref |
| MH992211 | Unassigned | Unassigned | Unassigned | 411_0   | Clustered           | 48 VC_411_0  | 48  | 0.4808 | 1          | 0.4808 | 0 | 0 | 0 |        | 1 Ref |
| MH992213 | Unassigned | Unassigned | Unassigned | 1028_0  | Clustered           | 69 VC_1028_0 | 69  | 0.8547 | 1          | 0.8547 | 0 | 0 | 0 |        | 1 Ref |
| MH992214 | Unassigned | Unassigned | Unassigned | 1119_0  | Clustered           | 48 VC_1119_0 | 48  | 0.852  | 1          | 0.852  | 0 | 0 | 0 |        | 1 Ref |
| MH992215 | Unassigned | Unassigned | Unassigned | 1119_0  | Clustered           | 48 VC_1119_0 | 48  | 0.852  | 1          | 0.852  | 0 | 0 | 0 |        | 1 Ref |
| MH992216 | Unassigned | Unassigned | Unassigned | 1119_0  | Clustered           | 48 VC_1119_0 | 48  | 0.852  | 1          | 0.852  | 0 | 0 | 0 |        | 1 Ref |
| MH992217 | Unassigned | Unassigned | Unassigned | 1119_0  | Clustered           | 48 VC_1119_0 | 48  | 0.852  | 1          | 0.852  | 0 | 0 | 0 |        | 1 Ref |
| MH992218 | Unassigned | Unassigned | Unassigned | 338_0   | Clustered           | 12 VC_338_0  | 12  | 0.8919 | 1          | 0.8919 | 0 | 0 | 0 |        | 1 Ref |
| MH992219 | Unassigned | Unassigned | Unassigned | 1119_0  | Clustered           | 48 VC_1119_0 | 48  | 0.852  | 1          | 0.852  | 0 | 0 | 0 |        | 1 Ref |
| MH992220 | Unassigned | Unassigned | Unassigned | 1119_0  | Clustered           | 48 VC_1119_0 | 48  | 0.852  | 1          | 0.852  | 0 | 0 | 0 |        | 1 Ref |
| MH992222 | Unassigned | Unassigned | Unassigned | 1119_0  | Clustered           | 48 VC_1119_0 | 48  | 0.852  | 1          | 0.852  | 0 | 0 | 0 |        | 1 Ref |
| MH992509 | Unassigned | Unassigned | Unassigned | 654_0   | Clustered           | 115 VC_654_0 | 115 | 0.7303 | 1          | 0.7303 | 0 | 0 | 0 | 0.8764 | Ref   |
| MH992510 | Unassigned | Unassigned | Unassigned | 290_129 | Clustered/Singleton | 1 VC_290_129 | 1   | 0      | 1          | 0      | 0 | 0 | 0 |        | 1 Ref |
| MH992513 | Unassigned | Unassigned | Unassigned | 907_0   | Clustered           | 32 VC_907_0  | 32  | 0.9964 | 1          | 0.9964 | 0 | 0 | 0 |        | 1 Ref |
| MH999279 | Unassigned | Unassigned | Unassigned | 928_0   | Clustered           | 6 VC_928_0   | 6   | 0.4065 | 1          | 0.4065 | 0 | 0 | 0 |        | 1 Ref |



|          |            |            |            |        |                     |              |    |        |            |        |   |   |   |            |
|----------|------------|------------|------------|--------|---------------------|--------------|----|--------|------------|--------|---|---|---|------------|
| MH999280 | Unassigned | Unassigned | Unassigned | 839_0  | Clustered           | 8 VC_839_0   | 8  | 0.9889 | 1          | 0.9889 | 0 | 0 | 0 | 1 Ref      |
| MK002701 | Unassigned | Unassigned | Unassigned | 364_0  | Clustered           | 3 VC_364_0   | 3  | 0.729  | 0.98867275 | 0.7207 | 0 | 0 | 0 | 1 Ref      |
| MK005300 | Unassigned | Unassigned | Unassigned | 199_20 | Clustered/Singleton | 1 VC_199_20  | 1  | 0      | 1          | 0      | 0 | 0 | 0 | 1 Ref      |
| MK016491 | Unassigned | Unassigned | Unassigned | 571_5  | Clustered           | 2 VC_571_5   | 2  | 0.0054 | 0.95548062 | 0.0052 | 0 | 0 | 0 | 1 Ref      |
| MK016492 | Unassigned | Unassigned | Unassigned | 543_0  | Clustered           | 25 VC_543_0  | 25 | 0.4584 | 1          | 0.4584 | 0 | 0 | 0 | 1 Ref      |
| MK016494 | Unassigned | Unassigned | Unassigned | 538_31 | Clustered           | 11 VC_538_31 | 11 | 0.0894 | 1          | 0.0894 | 0 | 0 | 0 | 0.6 Ref    |
| MK016495 | Unassigned | Unassigned | Unassigned | 1202_0 | Clustered           | 10 VC_1202_0 | 10 | 0.5679 | 1          | 0.5679 | 0 | 0 | 0 | 1 Ref      |
| MK016496 | Unassigned | Unassigned | Unassigned | 538_77 | Clustered           | 3 VC_538_77  | 3  | 0.0216 | 0.99859911 | 0.0216 | 0 | 0 | 0 | 1 Ref      |
| MK016497 | Unassigned | Unassigned | Unassigned | 1202_0 | Clustered           | 10 VC_1202_0 | 10 | 0.5679 | 1          | 0.5679 | 0 | 0 | 0 | 1 Ref      |
| MK016498 | Unassigned | Unassigned | Unassigned | 571_5  | Clustered           | 2 VC_571_5   | 2  | 0.0054 | 0.95548062 | 0.0052 | 0 | 0 | 0 | 1 Ref      |
| MK016499 | Unassigned | Unassigned | Unassigned | 537_0  | Clustered           | 39 VC_537_0  | 39 | 0.8148 | 1          | 0.8148 | 0 | 0 | 0 | 1 Ref      |
| MK016501 | Unassigned | Unassigned | Unassigned | 583_0  | Clustered           | 2 VC_583_0   | 2  | 0.0713 | 0.956426   | 0.0682 | 0 | 0 | 0 | 1 Ref      |
| MK016502 | Unassigned | Unassigned | Unassigned | 571_0  | Clustered           | 16 VC_571_0  | 16 | 0.091  | 1          | 0.091  | 0 | 0 | 0 | 0.6667 Ref |
| MK016503 | Unassigned | Unassigned | Unassigned | 243_0  | Clustered           | 72 VC_243_0  | 72 | 0.8089 | 1          | 0.8089 | 0 | 0 | 0 | 1 Ref      |
| MK016504 | Unassigned | Unassigned | Unassigned | 538_90 | Clustered/Singleton | 1 VC_538_90  | 1  | 0      | 1          | 0      | 0 | 0 | 0 | 1 Ref      |
| MK016662 | Unassigned | Unassigned | Unassigned | 352_0  | Clustered           | 31 VC_352_0  | 31 | 0.9547 | 1          | 0.9547 | 0 | 0 | 0 | 1 Ref      |
| MK016664 | Unassigned | Unassigned | Unassigned | 449_1  | Clustered/Singleton | 1 VC_449_1   | 1  | 0      | 1          | 0      | 0 | 0 | 0 | 1 Ref      |
| MK017819 | Unassigned | Unassigned | Unassigned | 1060_0 | Clustered           | 4 VC_1060_0  | 4  | 0.875  | 0.99993415 | 0.8749 | 0 | 0 | 0 | 1 Ref      |
| MK017820 | Unassigned | Unassigned | Unassigned | 930_0  | Clustered           | 4 VC_930_0   | 4  | 0.2568 | 0.99997246 | 0.2568 | 0 | 0 | 0 | 1 Ref      |
| MK024806 | Unassigned | Unassigned | Unassigned | 601_3  | Clustered           | 12 VC_601_3  | 12 | 0.2339 | 1          | 0.2339 | 0 | 0 | 0 | 0.8636 Ref |
| MK033136 | Unassigned | Unassigned | Unassigned | 465_0  | Clustered           | 80 VC_465_0  | 80 | 0.9988 | 1          | 0.9988 | 0 | 0 | 0 | 1 Ref      |
| MK033137 | Unassigned | Unassigned | Unassigned | 132_0  | Clustered           | 19 VC_132_0  | 19 | 0.6051 | 1          | 0.6051 | 0 | 0 | 0 | 1 Ref      |
| MK034952 | Unassigned | Unassigned | Unassigned | 2_0    | Clustered           | 4 VC_2_0     | 4  | 0.13   | 0.99998694 | 0.13   | 0 | 0 | 0 | 1 Ref      |
| MK047717 | Unassigned | Unassigned | Unassigned | 293_15 | Clustered           | 2 VC_293_15  | 2  | 0.0073 | 0.75626308 | 0.0055 | 0 | 0 | 0 | 1 Ref      |
| MK047718 | Unassigned | Unassigned | Unassigned | 293_17 | Clustered           | 8 VC_293_17  | 8  | 0.0534 | 0.99997879 | 0.0534 | 0 | 0 | 0 | 0.6071 Ref |
| MK050846 | Unassigned | Unassigned | Unassigned | 199_32 | Clustered           | 12 VC_199_32 | 12 | 0.0676 | 1          | 0.0676 | 0 | 0 | 0 | 0.7576 Ref |
| MK053931 | Unassigned | Unassigned | Unassigned | 907_0  | Clustered           | 32 VC_907_0  | 32 | 0.9964 | 1          | 0.9964 | 0 | 0 | 0 | 1 Ref      |
| MK054204 | Unassigned | Unassigned | Unassigned | 618_0  | Clustered           | 50 VC_618_0  | 50 | 0.9989 | 1          | 0.9989 | 0 | 0 | 0 | 1 Ref      |
| MK054205 | Unassigned | Unassigned | Unassigned | 618_0  | Clustered           | 50 VC_618_0  | 50 | 0.9989 | 1          | 0.9989 | 0 | 0 | 0 | 1 Ref      |
| MK054206 | Unassigned | Unassigned | Unassigned | 618_0  | Clustered           | 50 VC_618_0  | 50 | 0.9989 | 1          | 0.9989 | 0 | 0 | 0 | 1 Ref      |
| MK054207 | Unassigned | Unassigned | Unassigned | 618_0  | Clustered           | 50 VC_618_0  | 50 | 0.9989 | 1          | 0.9989 | 0 | 0 | 0 | 1 Ref      |
| MK054208 | Unassigned | Unassigned | Unassigned | 618_0  | Clustered           | 50 VC_618_0  | 50 | 0.9989 | 1          | 0.9989 | 0 | 0 | 0 | 1 Ref      |
| MK054209 | Unassigned | Unassigned | Unassigned | 618_0  | Clustered           | 50 VC_618_0  | 50 | 0.9989 | 1          | 0.9989 | 0 | 0 | 0 | 1 Ref      |
| MK054210 | Unassigned | Unassigned | Unassigned | 618_0  | Clustered           | 50 VC_618_0  | 50 | 0.9989 | 1          | 0.9989 | 0 | 0 | 0 | 1 Ref      |
| MK054211 | Unassigned | Unassigned | Unassigned | 618_0  | Clustered           | 50 VC_618_0  | 50 | 0.9989 | 1          | 0.9989 | 0 | 0 | 0 | 1 Ref      |
| MK054212 | Unassigned | Unassigned | Unassigned | 618_0  | Clustered           | 50 VC_618_0  | 50 | 0.9989 | 1          | 0.9989 | 0 | 0 | 0 | 1 Ref      |
| MK054213 | Unassigned | Unassigned | Unassigned | 618_0  | Clustered           | 50 VC_618_0  | 50 | 0.9989 | 1          | 0.9989 | 0 | 0 | 0 | 1 Ref      |
| MK054214 | Unassigned | Unassigned | Unassigned | 618_0  | Clustered           | 50 VC_618_0  | 50 | 0.9989 | 1          | 0.9989 | 0 | 0 | 0 | 1 Ref      |
| MK054215 | Unassigned | Unassigned | Unassigned | 618_0  | Clustered           | 50 VC_618_0  | 50 | 0.9989 | 1          | 0.9989 | 0 | 0 | 0 | 1 Ref      |
| MK054216 | Unassigned | Unassigned | Unassigned | 618_0  | Clustered           | 50 VC_618_0  | 50 | 0.9989 | 1          | 0.9989 | 0 | 0 | 0 | 1 Ref      |
| MK054217 | Unassigned | Unassigned | Unassigned | 618_0  | Clustered           | 50 VC_618_0  | 50 | 0.9989 | 1          | 0.9989 | 0 | 0 | 0 | 1 Ref      |
| MK054218 | Unassigned | Unassigned | Unassigned | 618_0  | Clustered           | 50 VC_618_0  | 50 | 0.9989 | 1          | 0.9989 | 0 | 0 | 0 | 1 Ref      |
| MK054219 | Unassigned | Unassigned | Unassigned | 618_0  | Clustered           | 50 VC_618_0  | 50 | 0.9989 | 1          | 0.9989 | 0 | 0 | 0 | 1 Ref      |
| MK054220 | Unassigned | Unassigned | Unassigned | 618_0  | Clustered           | 50 VC_618_0  | 50 | 0.9989 | 1          | 0.9989 | 0 | 0 | 0 | 1 Ref      |
| MK054221 | Unassigned | Unassigned | Unassigned | 618_0  | Clustered           | 50 VC_618_0  | 50 | 0.9989 | 1          | 0.9989 | 0 | 0 | 0 | 1 Ref      |
| MK054222 | Unassigned | Unassigned | Unassigned | 618_0  | Clustered           | 50 VC_618_0  | 50 | 0.9989 | 1          | 0.9989 | 0 | 0 | 0 | 1 Ref      |
| MK054223 | Unassigned | Unassigned | Unassigned | 618_0  | Clustered           | 50 VC_618_0  | 50 | 0.9989 | 1          | 0.9989 | 0 | 0 | 0 | 1 Ref      |
| MK054224 | Unassigned | Unassigned | Unassigned | 618_0  | Clustered           | 50 VC_618_0  | 50 | 0.9989 | 1          | 0.9989 | 0 | 0 | 0 | 1 Ref      |
| MK054225 | Unassigned | Unassigned | Unassigned | 618_0  | Clustered           | 50 VC_618_0  | 50 | 0.9989 | 1          | 0.9989 | 0 | 0 | 0 | 1 Ref      |
| MK054226 | Unassigned | Unassigned | Unassigned | 618_0  | Clustered           | 50 VC_618_0  | 50 | 0.9989 | 1          | 0.9989 | 0 | 0 | 0 | 1 Ref      |
| MK054227 | Unassigned | Unassigned | Unassigned | 618_0  | Clustered           | 50 VC_618_0  | 50 | 0.9989 | 1          | 0.9989 | 0 | 0 | 0 | 1 Ref      |
| MK054228 | Unassigned | Unassigned | Unassigned | 618_0  | Clustered           | 50 VC_618_0  | 50 | 0.9989 | 1          | 0.9989 | 0 | 0 | 0 | 1 Ref      |
| MK054229 | Unassigned | Unassigned | Unassigned | 618_0  | Clustered           | 50 VC_618_0  | 50 | 0.9989 | 1          | 0.9989 | 0 | 0 | 0 | 1 Ref      |
| MK054230 | Unassigned | Unassigned | Unassigned | 618_0  | Clustered           | 50 VC_618_0  | 50 | 0.9989 | 1          | 0.9989 | 0 | 0 | 0 | 1 Ref      |
| MK054231 | Unassigned | Unassigned | Unassigned | 618_0  | Clustered           | 50 VC_618_0  | 50 | 0.9989 | 1          | 0.9989 | 0 | 0 | 0 | 1 Ref      |
| MK054232 | Unassigned | Unassigned | Unassigned | 618_0  | Clustered           | 50 VC_618_0  | 50 | 0.9989 | 1          | 0.9989 | 0 | 0 | 0 | 1 Ref      |
| MK054233 | Unassigned | Unassigned | Unassigned | 618_0  | Clustered           | 50 VC_618_0  | 50 | 0.9989 | 1          | 0.9989 | 0 | 0 | 0 | 1 Ref      |
| MK054234 | Unassigned | Unassigned | Unassigned | 618_0  | Clustered           | 50 VC_618_0  | 50 | 0.9989 | 1          | 0.9989 | 0 | 0 | 0 | 1 Ref      |
| MK054235 | Unassigned | Unassigned | Unassigned | 618_0  | Clustered           | 50 VC_618_0  | 50 | 0.9989 | 1          | 0.9989 | 0 | 0 | 0 | 1 Ref      |
| MK054236 | Unassigned | Unassigned | Unassigned | 618_0  | Clustered           | 50 VC_618_0  | 50 | 0.9989 | 1          | 0.9989 | 0 | 0 | 0 | 1 Ref      |
| MK054237 | Unassigned | Unassigned | Unassigned | 618_0  | Clustered           | 50 VC_618_0  | 50 | 0.9989 | 1          | 0.9989 | 0 | 0 | 0 | 1 Ref      |
| MK059749 | Unassigned | Unassigned | Unassigned | 385_2  | Clustered           | 5 VC_385_2   | 5  | 0.0717 | 0.99999997 | 0.0717 | 0 | 0 | 0 | 0.9 Ref    |
| MK061407 | Unassigned | Unassigned | Unassigned | 973_0  | Clustered           | 15 VC_973_0  | 15 | 1      | 0          | 0      | 0 | 0 | 0 | 1 Ref      |
| MK061408 | Unassigned | Unassigned | Unassigned | 223_4  | Clustered           | 13 VC_223_4  | 13 | 0.1649 | 1          | 0.1649 | 0 | 0 | 0 | 1 Ref      |
| MK061409 | Unassigned | Unassigned | Unassigned | 232_0  | Clustered           | 32 VC_232_0  | 32 | 0.8471 | 1          | 0.8471 | 0 | 0 | 0 | 0.996 Ref  |
| MK061410 | Unassigned | Unassigned | Unassigned | 1218_0 | Clustered           | 14 VC_1218_0 | 14 | 0.7811 | 1          | 0.7811 | 0 | 0 | 0 | 0.989 Ref  |
| MK061411 | Unassigned | Unassigned | Unassigned | 526_0  | Clustered           | 32 VC_526_0  | 32 | 0.9037 | 1          | 0.9037 | 0 | 0 | 0 | 1 Ref      |
| MK061412 | Unassigned | Unassigned | Unassigned | 1115_3 | Clustered           | 6 VC_1115_3  | 6  | 0.1298 | 0.99999994 | 0.1298 | 0 | 0 | 0 | 0.8667 Ref |
| MK061413 | Unassigned | Unassigned | Unassigned | 1250_0 | Clustered           | 29 VC_1250_0 | 29 | 0.822  | 1          | 0.822  | 0 | 0 | 0 | 1 Ref      |
| MK061414 | Unassigned | Unassigned | Unassigned | 527_0  | Clustered           | 37 VC_527_0  | 37 | 0.9679 | 1          | 0.9679 | 0 | 0 | 0 | 1 Ref      |
| MK061415 | Unassigned | Unassigned | Unassigned | 335_51 | Clustered           | 3 VC_335_51  | 3  | 0.008  | 0.99634936 | 0.008  | 0 | 0 | 0 | 0.6667 Ref |
| MK064562 | Unassigned | Unassigned | Unassigned | 1417_0 | Clustered           | 3 VC_1417_0  | 3  | 0.9824 | 0.9595722  | 0.9427 | 0 | 0 | 0 | 1 Ref      |
| MK064563 | Unassigned | Unassigned | Unassigned | 1417_0 | Clustered           | 3 VC_1417_0  | 3  | 0.9824 | 0.9595722  | 0.9427 | 0 | 0 | 0 | 1 Ref      |
| MK064564 | Unassigned | Unassigned | Unassigned | 362_0  | Clustered           | 2 VC_362_0   | 2  | 0.3217 | 0.93865445 | 0.3019 | 0 | 0 | 0 | 1 Ref      |
| MK064565 | Unassigned | Unassigned | Unassigned | 360_0  | Clustered           | 22 VC_360_0  | 22 | 0.96   | 1          | 0.96   | 0 | 0 | 0 | 1 Ref      |
| MK069403 | Unassigned | Unassigned | Unassigned | 691_0  | Clustered           | 18 VC_691_0  | 18 | 0.6865 | 1          | 0.6865 | 0 | 0 | 0 | 0.9477 Ref |
| MK071653 | Unassigned | Unassigned | Unassigned | 1428_0 | Clustered           | 2 VC_1428_0  | 2  | 0.8102 | 0.72985431 | 0.5914 | 0 | 0 | 0 | 1 Ref      |
| MK075001 | Unassigned | Unassigned | Unassigned | 15_1   | Clustered           | 9 VC_15_1    | 9  | 0.1817 | 1          | 0.1817 | 0 | 0 | 0 | 0.9167 Ref |
| MK075002 | Unassigned | Unassigned | Unassigned | 15_0   | Clustered           | 3 VC_15_0    | 3  | 0.0477 | 0.99853676 | 0.0476 | 0 | 0 | 0 | 1 Ref      |
| MK075003 | Unassigned | Unassigned | Unassigned | 11_0   | Clustered           | 19 VC_11_0   | 19 | 0.7544 | 1          | 0.7544 | 0 | 0 | 0 | 1 Ref      |
| MK075004 | Unassigned | Unassigned | Unassigned | 15_1   | Clustered           | 9 VC_15_1    | 9  | 0.1817 | 1          | 0.1817 | 0 | 0 | 0 | 0.9167 Ref |



|          |            |            |            |        |                     |              |     |        |            |        |   |   |   |            |
|----------|------------|------------|------------|--------|---------------------|--------------|-----|--------|------------|--------|---|---|---|------------|
| MK075006 | Unassigned | Unassigned | Unassigned | 11_0   | Clustered           | 19 VC_111_0  | 19  | 0.7544 | 1          | 0.7544 | 0 | 0 | 0 | 1 Ref      |
| MK080312 | Unassigned | Unassigned | Unassigned | 1275_0 | Clustered           | 4 VC_1275_0  | 4   | 0.747  | 0.9991311  | 0.7463 | 0 | 0 | 0 | 1 Ref      |
| MK084630 | Unassigned | Unassigned | Unassigned | 843_0  | Clustered           | 20 VC_843_0  | 20  | 0.9621 | 1          | 0.9621 | 0 | 0 | 0 | 1 Ref      |
| MK085976 | Unassigned | Unassigned | Unassigned | 719_0  | Clustered           | 16 VC_719_0  | 16  | 0.728  | 1          | 0.728  | 0 | 0 | 0 | 1 Ref      |
| MK088078 | Unassigned | Unassigned | Unassigned | 193_0  | Clustered           | 3 VC_193_0   | 3   | 0.4439 | 0.97148006 | 0.4313 | 0 | 0 | 0 | 1 Ref      |
| MK089780 | Unassigned | Unassigned | Unassigned | 714_0  | Clustered           | 71 VC_714_0  | 71  | 0.935  | 1          | 0.935  | 0 | 0 | 0 | 1 Ref      |
| MK095192 | Unassigned | Unassigned | Unassigned | 1018_0 | Clustered           | 38 VC_1018_0 | 38  | 0.9757 | 1          | 0.9757 | 0 | 0 | 0 | 1 Ref      |
| MK095193 | Unassigned | Unassigned | Unassigned | 1018_0 | Clustered           | 38 VC_1018_0 | 38  | 0.9757 | 1          | 0.9757 | 0 | 0 | 0 | 1 Ref      |
| MK095194 | Unassigned | Unassigned | Unassigned | 1018_0 | Clustered           | 38 VC_1018_0 | 38  | 0.9757 | 1          | 0.9757 | 0 | 0 | 0 | 1 Ref      |
| MK095195 | Unassigned | Unassigned | Unassigned | 1018_0 | Clustered           | 38 VC_1018_0 | 38  | 0.9757 | 1          | 0.9757 | 0 | 0 | 0 | 1 Ref      |
| MK095196 | Unassigned | Unassigned | Unassigned | 1018_0 | Clustered           | 38 VC_1018_0 | 38  | 0.9757 | 1          | 0.9757 | 0 | 0 | 0 | 1 Ref      |
| MK095197 | Unassigned | Unassigned | Unassigned | 1018_0 | Clustered           | 38 VC_1018_0 | 38  | 0.9757 | 1          | 0.9757 | 0 | 0 | 0 | 1 Ref      |
| MK095198 | Unassigned | Unassigned | Unassigned | 1018_0 | Clustered           | 38 VC_1018_0 | 38  | 0.9757 | 1          | 0.9757 | 0 | 0 | 0 | 1 Ref      |
| MK095199 | Unassigned | Unassigned | Unassigned | 1018_0 | Clustered           | 38 VC_1018_0 | 38  | 0.9757 | 1          | 0.9757 | 0 | 0 | 0 | 1 Ref      |
| MK095200 | Unassigned | Unassigned | Unassigned | 1018_0 | Clustered           | 38 VC_1018_0 | 38  | 0.9757 | 1          | 0.9757 | 0 | 0 | 0 | 1 Ref      |
| MK095201 | Unassigned | Unassigned | Unassigned | 1018_0 | Clustered           | 38 VC_1018_0 | 38  | 0.9757 | 1          | 0.9757 | 0 | 0 | 0 | 1 Ref      |
| MK095202 | Unassigned | Unassigned | Unassigned | 1018_0 | Clustered           | 38 VC_1018_0 | 38  | 0.9757 | 1          | 0.9757 | 0 | 0 | 0 | 1 Ref      |
| MK095203 | Unassigned | Unassigned | Unassigned | 1018_0 | Clustered           | 38 VC_1018_0 | 38  | 0.9757 | 1          | 0.9757 | 0 | 0 | 0 | 1 Ref      |
| MK095204 | Unassigned | Unassigned | Unassigned | 1018_0 | Clustered           | 38 VC_1018_0 | 38  | 0.9757 | 1          | 0.9757 | 0 | 0 | 0 | 1 Ref      |
| MK095205 | Unassigned | Unassigned | Unassigned | 1018_0 | Clustered           | 38 VC_1018_0 | 38  | 0.9757 | 1          | 0.9757 | 0 | 0 | 0 | 1 Ref      |
| MK095206 | Unassigned | Unassigned | Unassigned | 1018_0 | Clustered           | 38 VC_1018_0 | 38  | 0.9757 | 1          | 0.9757 | 0 | 0 | 0 | 1 Ref      |
| MK095207 | Unassigned | Unassigned | Unassigned | 1018_0 | Clustered           | 38 VC_1018_0 | 38  | 0.9757 | 1          | 0.9757 | 0 | 0 | 0 | 1 Ref      |
| MK095208 | Unassigned | Unassigned | Unassigned | 1018_0 | Clustered           | 38 VC_1018_0 | 38  | 0.9757 | 1          | 0.9757 | 0 | 0 | 0 | 1 Ref      |
| MK095209 | Unassigned | Unassigned | Unassigned | 1018_0 | Clustered           | 38 VC_1018_0 | 38  | 0.9757 | 1          | 0.9757 | 0 | 0 | 0 | 1 Ref      |
| MK095210 | Unassigned | Unassigned | Unassigned | 1018_0 | Clustered           | 38 VC_1018_0 | 38  | 0.9757 | 1          | 0.9757 | 0 | 0 | 0 | 1 Ref      |
| MK095211 | Unassigned | Unassigned | Unassigned | 1018_0 | Clustered           | 38 VC_1018_0 | 38  | 0.9757 | 1          | 0.9757 | 0 | 0 | 0 | 1 Ref      |
| MK097141 | Unassigned | Unassigned | Unassigned | 661_2  | Clustered           | 6 VC_661_2   | 6   | 0.1674 | 1          | 0.1674 | 0 | 0 | 0 | 1 Ref      |
| MK105819 | Unassigned | Unassigned | Unassigned | 369_0  | Clustered           | 2 VC_369_0   | 2   | 0.1984 | 0.93211095 | 0.185  | 0 | 0 | 0 | 1 Ref      |
| MK105855 | Unassigned | Unassigned | Unassigned | 721_0  | Clustered           | 11 VC_721_0  | 11  | 0.8846 | 1          | 0.8846 | 0 | 0 | 0 | 1 Ref      |
| MK112526 | Unassigned | Unassigned | Unassigned | 1200_0 | Clustered           | 73 VC_1200_0 | 73  | 0.9825 | 1          | 0.9825 | 0 | 0 | 0 | 1 Ref      |
| MK112527 | Unassigned | Unassigned | Unassigned | 384_15 | Clustered           | 44 VC_384_15 | 44  | 0.139  | 1          | 0.139  | 0 | 0 | 0 | 0.7474 Ref |
| MK112528 | Unassigned | Unassigned | Unassigned | 1200_0 | Clustered           | 73 VC_1200_0 | 73  | 0.9825 | 1          | 0.9825 | 0 | 0 | 0 | 1 Ref      |
| MK112529 | Unassigned | Unassigned | Unassigned | 1200_0 | Clustered           | 73 VC_1200_0 | 73  | 0.9825 | 1          | 0.9825 | 0 | 0 | 0 | 1 Ref      |
| MK112530 | Unassigned | Unassigned | Unassigned | 335_36 | Clustered           | 2 VC_335_36  | 2   | 0.0036 | 0.94071129 | 0.0034 | 0 | 0 | 0 | 1 Ref      |
| MK112531 | Unassigned | Unassigned | Unassigned | 1200_0 | Clustered           | 73 VC_1200_0 | 73  | 0.9825 | 1          | 0.9825 | 0 | 0 | 0 | 1 Ref      |
| MK112532 | Unassigned | Unassigned | Unassigned | 335_33 | Clustered           | 4 VC_335_33  | 4   | 0.0148 | 0.99998565 | 0.0148 | 0 | 0 | 0 | 1 Ref      |
| MK112533 | Unassigned | Unassigned | Unassigned | 579_51 | Clustered/Singleton | 1 VC_579_51  | 1   | 0      | 1          | 0      | 0 | 0 | 0 | 1 Ref      |
| MK112534 | Unassigned | Unassigned | Unassigned | 579_10 | Clustered/Singleton | 1 VC_579_10  | 1   | 0      | 1          | 0      | 0 | 0 | 0 | 1 Ref      |
| MK112535 | Unassigned | Unassigned | Unassigned | 1200_0 | Clustered           | 73 VC_1200_0 | 73  | 0.9825 | 1          | 0.9825 | 0 | 0 | 0 | 1 Ref      |
| MK112536 | Unassigned | Unassigned | Unassigned | 384_15 | Clustered           | 44 VC_384_15 | 44  | 0.139  | 1          | 0.139  | 0 | 0 | 0 | 0.7474 Ref |
| MK112537 | Unassigned | Unassigned | Unassigned | 243_0  | Clustered           | 72 VC_243_0  | 72  | 0.8089 | 1          | 0.8089 | 0 | 0 | 0 | 1 Ref      |
| MK112538 | Unassigned | Unassigned | Unassigned | 1200_0 | Clustered           | 73 VC_1200_0 | 73  | 0.9825 | 1          | 0.9825 | 0 | 0 | 0 | 1 Ref      |
| MK112539 | Unassigned | Unassigned | Unassigned | 384_11 | Clustered           | 31 VC_384_11 | 31  | 0.0926 | 1          | 0.0926 | 0 | 0 | 0 | 0.7011 Ref |
| MK112540 | Unassigned | Unassigned | Unassigned | 335_42 | Clustered           | 2 VC_335_42  | 2   | 0.0039 | 0.95008941 | 0.0037 | 0 | 0 | 0 | 1 Ref      |
| MK112541 | Unassigned | Unassigned | Unassigned | 579_47 | Clustered           | 3 VC_579_47  | 3   | 0.0064 | 0.78059765 | 0.005  | 0 | 0 | 0 | 1 Ref      |
| MK112542 | Unassigned | Unassigned | Unassigned | 384_16 | Clustered           | 42 VC_384_16 | 42  | 0.134  | 1          | 0.134  | 0 | 0 | 0 | 0.7282 Ref |
| MK112543 | Unassigned | Unassigned | Unassigned | 532_0  | Clustered           | 75 VC_532_0  | 75  | 0.9393 | 1          | 0.9393 | 0 | 0 | 0 | 1 Ref      |
| MK112544 | Unassigned | Unassigned | Unassigned | 384_12 | Clustered           | 4 VC_384_12  | 4   | 0.0125 | 0.99998491 | 0.0125 | 0 | 0 | 0 | 0.8333 Ref |
| MK112545 | Unassigned | Unassigned | Unassigned | 579_47 | Clustered           | 3 VC_579_47  | 3   | 0.0064 | 0.78059765 | 0.005  | 0 | 0 | 0 | 1 Ref      |
| MK112546 | Unassigned | Unassigned | Unassigned | 384_11 | Clustered           | 31 VC_384_11 | 31  | 0.0926 | 1          | 0.0926 | 0 | 0 | 0 | 0.7011 Ref |
| MK112547 | Unassigned | Unassigned | Unassigned | 543_0  | Clustered           | 25 VC_543_0  | 25  | 0.4584 | 1          | 0.4584 | 0 | 0 | 0 | 1 Ref      |
| MK112548 | Unassigned | Unassigned | Unassigned | 579_47 | Clustered           | 3 VC_579_47  | 3   | 0.0064 | 0.78059765 | 0.005  | 0 | 0 | 0 | 1 Ref      |
| MK112549 | Unassigned | Unassigned | Unassigned | 579_34 | Clustered/Singleton | 1 VC_579_34  | 1   | 0      | 1          | 0      | 0 | 0 | 0 | 1 Ref      |
| MK112550 | Unassigned | Unassigned | Unassigned | 1278_0 | Clustered           | 19 VC_1278_0 | 19  | 1      | 1          | 1      | 0 | 0 | 0 | 1 Ref      |
| MK112551 | Unassigned | Unassigned | Unassigned | 384_11 | Clustered           | 31 VC_384_11 | 31  | 0.0926 | 1          | 0.0926 | 0 | 0 | 0 | 0.7011 Ref |
| MK112552 | Unassigned | Unassigned | Unassigned | 384_2  | Clustered           | 8 VC_384_2   | 8   | 0.0232 | 1          | 0.0232 | 0 | 0 | 0 | 0.8571 Ref |
| MK112553 | Unassigned | Unassigned | Unassigned | 384_16 | Clustered           | 42 VC_384_16 | 42  | 0.134  | 1          | 0.134  | 0 | 0 | 0 | 0.7282 Ref |
| MK112554 | Unassigned | Unassigned | Unassigned | 579_49 | Clustered           | 7 VC_579_49  | 7   | 0.0194 | 0.98914431 | 0.0191 | 0 | 0 | 0 | 0.8571 Ref |
| MK112555 | Unassigned | Unassigned | Unassigned | 384_15 | Clustered           | 44 VC_384_15 | 44  | 0.139  | 1          | 0.139  | 0 | 0 | 0 | 0.7474 Ref |
| MK112556 | Unassigned | Unassigned | Unassigned | 538_74 | Clustered           | 2 VC_538_74  | 2   | 0.0075 | 0.95760586 | 0.0072 | 0 | 0 | 0 | 1 Ref      |
| MK112901 | Unassigned | Unassigned | Unassigned | 475_0  | Clustered           | 96 VC_475_0  | 96  | 0.9303 | 1          | 0.9303 | 0 | 0 | 0 | 0.9575 Ref |
| MK125140 | Unassigned | Unassigned | Unassigned | 711_0  | Clustered           | 48 VC_711_0  | 48  | 0.8217 | 1          | 0.8217 | 0 | 0 | 0 | 1 Ref      |
| MK125141 | Unassigned | Unassigned | Unassigned | 721_0  | Clustered           | 11 VC_721_0  | 11  | 0.8846 | 1          | 0.8846 | 0 | 0 | 0 | 1 Ref      |
| MK134560 | Unassigned | Unassigned | Unassigned | 848_0  | Clustered           | 124 VC_848_0 | 124 | 0.9484 | 1          | 0.9484 | 0 | 0 | 0 | 1 Ref      |
| MK135468 | Unassigned | Unassigned | Unassigned | 113_0  | Clustered           | 91 VC_113_0  | 91  | 0.9584 | 1          | 0.9584 | 0 | 0 | 0 | 1 Ref      |
| MK138526 | Unassigned | Unassigned | Unassigned | 77_0   | Clustered           | 37 VC_77_0   | 37  | 0.9392 | 1          | 0.9392 | 0 | 0 | 0 | 1 Ref      |
| MK138527 | Unassigned | Unassigned | Unassigned | 859_0  | Clustered           | 67 VC_859_0  | 67  | 0.9622 | 1          | 0.9622 | 0 | 0 | 0 | 1 Ref      |
| MK144667 | Unassigned | Unassigned | Unassigned | 185_0  | Clustered           | 53 VC_185_0  | 53  | 0.9153 | 1          | 0.9153 | 0 | 0 | 0 | 1 Ref      |
| MK165087 | Unassigned | Unassigned | Unassigned | 737_0  | Clustered           | 13 VC_737_0  | 13  | 0.5083 | 1          | 0.5083 | 0 | 0 | 0 | 1 Ref      |
| MK165657 | Unassigned | Unassigned | Unassigned | 766_0  | Clustered           | 40 VC_766_0  | 40  | 0.7511 | 1          | 0.7511 | 0 | 0 | 0 | 1 Ref      |
| MK165658 | Unassigned | Unassigned | Unassigned | 766_0  | Clustered           | 40 VC_766_0  | 40  | 0.7511 | 1          | 0.7511 | 0 | 0 | 0 | 1 Ref      |
| MK170160 | Unassigned | Unassigned | Unassigned | 715_0  | Clustered           | 10 VC_715_0  | 10  | 0.8045 | 1          | 0.8045 | 0 | 0 | 0 | 1 Ref      |
| MK170446 | Unassigned | Unassigned | Unassigned | 972_0  | Clustered           | 99 VC_972_0  | 99  | 0.9113 | 1          | 0.9113 | 0 | 0 | 0 | 0.9928 Ref |
| MK202159 | Unassigned | Unassigned | Unassigned | 261_0  | Clustered           | 13 VC_261_0  | 13  | 0.2024 | 1          | 0.2024 | 0 | 0 | 0 | 1 Ref      |
| MK202160 | Unassigned | Unassigned | Unassigned | 261_0  | Clustered           | 13 VC_261_0  | 13  | 0.2024 | 1          | 0.2024 | 0 | 0 | 0 | 1 Ref      |
| MK202161 | Unassigned | Unassigned | Unassigned | 261_0  | Clustered           | 13 VC_261_0  | 13  | 0.2024 | 1          | 0.2024 | 0 | 0 | 0 | 1 Ref      |
| MK203841 | Unassigned | Unassigned | Unassigned | 848_0  | Clustered           | 124 VC_848_0 | 124 | 0.9484 | 1          | 0.9484 | 0 | 0 | 0 | 1 Ref      |
| MK211557 | Unassigned | Unassigned | Unassigned | 12_2   | Clustered           | 19 VC_12_2   | 19  | 0.2009 | 1          | 0.2009 | 0 | 0 | 0 | 1 Ref      |
| MK213795 | Unassigned | Unassigned | Unassigned | 322_0  | Clustered           | 12 VC_322_0  | 12  | 0.8924 | 1          | 0.8924 | 0 | 0 | 0 | 1 Ref      |
| MK213796 | Unassigned | Unassigned | Unassigned | 595_0  | Clustered           | 35 VC_595_0  | 35  | 0.8809 | 1          | 0.8809 | 0 | 0 | 0 | 1 Ref      |
| MK214385 | Unassigned | Unassigned | Unassigned | 560_0  | Clustered           | 15 VC_560_0  | 15  | 0.2846 | 1          | 0.2846 | 0 | 0 | 0 | 1 Ref      |



|          |            |            |            |        |                     |              |     |        |            |        |   |   |   |            |
|----------|------------|------------|------------|--------|---------------------|--------------|-----|--------|------------|--------|---|---|---|------------|
| MK215646 | Unassigned | Unassigned | Unassigned | 912_0  | Clustered           | 10 VC_912_0  | 10  | 0.1994 | 1          | 0.1994 | 0 | 0 | 0 | 1 Ref      |
| MK224497 | Unassigned | Unassigned | Unassigned | 241_0  | Clustered           | 21 VC_241_0  | 21  | 0.8342 | 1          | 0.8342 | 0 | 0 | 0 | 1 Ref      |
| MK224498 | Unassigned | Unassigned | Unassigned | 77_0   | Clustered           | 37 VC_77_0   | 37  | 0.9392 | 1          | 0.9392 | 0 | 0 | 0 | 1 Ref      |
| MK224592 | Unassigned | Unassigned | Unassigned | 538_95 | Clustered/Singleton | 1 VC_538_95  | 1   | 0      | 1          | 0      | 0 | 0 | 0 | 1 Ref      |
| MK234886 | Unassigned | Unassigned | Unassigned | 297_5  | Clustered           | 14 VC_297_5  | 14  | 0.141  | 1          | 0.141  | 0 | 0 | 0 | 0.9231 Ref |
| MK238400 | Unassigned | Unassigned | Unassigned | 691_0  | Clustered           | 18 VC_691_0  | 18  | 0.6865 | 1          | 0.6865 | 0 | 0 | 0 | 0.9477 Ref |
| MK240351 | Unassigned | Unassigned | Unassigned | 510_0  | Clustered           | 2 VC_510_0   | 2   | 0.0158 | 0.67065552 | 0.0106 | 0 | 0 | 0 | 1 Ref      |
| MK240575 | Unassigned | Unassigned | Unassigned | 1414_0 | Clustered           | 2 VC_1414_0  | 2   | 1      | 1          | 1      | 0 | 0 | 0 | 1 Ref      |
| MK249126 | Unassigned | Unassigned | Unassigned | 654_0  | Clustered           | 115 VC_654_0 | 115 | 0.7303 | 1          | 0.7303 | 0 | 0 | 0 | 0.8764 Ref |
| MK249127 | Unassigned | Unassigned | Unassigned | 1108_0 | Clustered           | 52 VC_1108_0 | 52  | 0.7674 | 1          | 0.7674 | 0 | 0 | 0 | 1 Ref      |
| MK249128 | Unassigned | Unassigned | Unassigned | 1108_0 | Clustered           | 52 VC_1108_0 | 52  | 0.7674 | 1          | 0.7674 | 0 | 0 | 0 | 1 Ref      |
| MK249129 | Unassigned | Unassigned | Unassigned | 1108_0 | Clustered           | 52 VC_1108_0 | 52  | 0.7674 | 1          | 0.7674 | 0 | 0 | 0 | 1 Ref      |
| MK249131 | Unassigned | Unassigned | Unassigned | 1033_0 | Clustered           | 21 VC_1033_0 | 21  | 0.8433 | 0.99999998 | 0.8433 | 0 | 0 | 0 | 1 Ref      |
| MK249132 | Unassigned | Unassigned | Unassigned | 1109_0 | Clustered           | 2 VC_1109_0  | 2   | 0.0119 | 0.85807772 | 0.0102 | 0 | 0 | 0 | 1 Ref      |
| MK249133 | Unassigned | Unassigned | Unassigned | 1104_0 | Clustered           | 44 VC_1104_0 | 44  | 0.9574 | 0.72818579 | 0.6972 | 0 | 0 | 0 | 1 Ref      |
| MK249135 | Unassigned | Unassigned | Unassigned | 1027_0 | Clustered/Singleton | 1 VC_1027_0  | 1   | 0      | 1          | 0      | 0 | 0 | 0 | 1 Ref      |
| MK249138 | Unassigned | Unassigned | Unassigned | 1104_0 | Clustered           | 44 VC_1104_0 | 44  | 0.9574 | 0.72818579 | 0.6972 | 0 | 0 | 0 | 1 Ref      |
| MK249139 | Unassigned | Unassigned | Unassigned | 1108_0 | Clustered           | 52 VC_1108_0 | 52  | 0.7674 | 1          | 0.7674 | 0 | 0 | 0 | 1 Ref      |
| MK249141 | Unassigned | Unassigned | Unassigned | 1028_0 | Clustered           | 69 VC_1028_0 | 69  | 0.8547 | 1          | 0.8547 | 0 | 0 | 0 | 1 Ref      |
| MK249143 | Unassigned | Unassigned | Unassigned | 411_0  | Clustered           | 48 VC_411_0  | 48  | 0.4808 | 1          | 0.4808 | 0 | 0 | 0 | 1 Ref      |
| MK249144 | Unassigned | Unassigned | Unassigned | 1033_0 | Clustered           | 21 VC_1033_0 | 21  | 0.8433 | 0.99999998 | 0.8433 | 0 | 0 | 0 | 1 Ref      |
| MK249147 | Unassigned | Unassigned | Unassigned | 1028_0 | Clustered           | 69 VC_1028_0 | 69  | 0.8547 | 1          | 0.8547 | 0 | 0 | 0 | 1 Ref      |
| MK249148 | Unassigned | Unassigned | Unassigned | 1322_0 | Clustered           | 6 VC_1322_0  | 6   | 0.7063 | 0.92055725 | 0.6502 | 0 | 0 | 0 | 1 Ref      |
| MK249149 | Unassigned | Unassigned | Unassigned | 1108_0 | Clustered           | 52 VC_1108_0 | 52  | 0.7674 | 1          | 0.7674 | 0 | 0 | 0 | 1 Ref      |
| MK249150 | Unassigned | Unassigned | Unassigned | 1108_0 | Clustered           | 52 VC_1108_0 | 52  | 0.7674 | 1          | 0.7674 | 0 | 0 | 0 | 1 Ref      |
| MK249151 | Unassigned | Unassigned | Unassigned | 411_0  | Clustered           | 48 VC_411_0  | 48  | 0.4808 | 1          | 0.4808 | 0 | 0 | 0 | 1 Ref      |
| MK249153 | Unassigned | Unassigned | Unassigned | 1108_0 | Clustered           | 52 VC_1108_0 | 52  | 0.7674 | 1          | 0.7674 | 0 | 0 | 0 | 1 Ref      |
| MK249154 | Unassigned | Unassigned | Unassigned | 1108_0 | Clustered           | 52 VC_1108_0 | 52  | 0.7674 | 1          | 0.7674 | 0 | 0 | 0 | 1 Ref      |
| MK249155 | Unassigned | Unassigned | Unassigned | 1108_0 | Clustered           | 52 VC_1108_0 | 52  | 0.7674 | 1          | 0.7674 | 0 | 0 | 0 | 1 Ref      |
| MK249156 | Unassigned | Unassigned | Unassigned | 1033_0 | Clustered           | 21 VC_1033_0 | 21  | 0.8433 | 0.99999998 | 0.8433 | 0 | 0 | 0 | 1 Ref      |
| MK249158 | Unassigned | Unassigned | Unassigned | 1108_0 | Clustered           | 52 VC_1108_0 | 52  | 0.7674 | 1          | 0.7674 | 0 | 0 | 0 | 1 Ref      |
| MK249159 | Unassigned | Unassigned | Unassigned | 1033_0 | Clustered           | 21 VC_1033_0 | 21  | 0.8433 | 0.99999998 | 0.8433 | 0 | 0 | 0 | 1 Ref      |
| MK249160 | Unassigned | Unassigned | Unassigned | 1033_0 | Clustered           | 21 VC_1033_0 | 21  | 0.8433 | 0.99999998 | 0.8433 | 0 | 0 | 0 | 1 Ref      |
| MK249162 | Unassigned | Unassigned | Unassigned | 1108_0 | Clustered           | 52 VC_1108_0 | 52  | 0.7674 | 1          | 0.7674 | 0 | 0 | 0 | 1 Ref      |
| MK249163 | Unassigned | Unassigned | Unassigned | 1108_0 | Clustered           | 52 VC_1108_0 | 52  | 0.7674 | 1          | 0.7674 | 0 | 0 | 0 | 1 Ref      |
| MK249165 | Unassigned | Unassigned | Unassigned | 1028_0 | Clustered           | 69 VC_1028_0 | 69  | 0.8547 | 1          | 0.8547 | 0 | 0 | 0 | 1 Ref      |
| MK249166 | Unassigned | Unassigned | Unassigned | 1108_0 | Clustered           | 52 VC_1108_0 | 52  | 0.7674 | 1          | 0.7674 | 0 | 0 | 0 | 1 Ref      |
| MK249167 | Unassigned | Unassigned | Unassigned | 1033_0 | Clustered           | 21 VC_1033_0 | 21  | 0.8433 | 0.99999998 | 0.8433 | 0 | 0 | 0 | 1 Ref      |
| MK249168 | Unassigned | Unassigned | Unassigned | 1108_0 | Clustered           | 52 VC_1108_0 | 52  | 0.7674 | 1          | 0.7674 | 0 | 0 | 0 | 1 Ref      |
| MK249174 | Unassigned | Unassigned | Unassigned | 1108_0 | Clustered           | 52 VC_1108_0 | 52  | 0.7674 | 1          | 0.7674 | 0 | 0 | 0 | 1 Ref      |
| MK249176 | Unassigned | Unassigned | Unassigned | 1108_0 | Clustered           | 52 VC_1108_0 | 52  | 0.7674 | 1          | 0.7674 | 0 | 0 | 0 | 1 Ref      |
| MK249178 | Unassigned | Unassigned | Unassigned | 1108_0 | Clustered           | 52 VC_1108_0 | 52  | 0.7674 | 1          | 0.7674 | 0 | 0 | 0 | 1 Ref      |
| MK249179 | Unassigned | Unassigned | Unassigned | 1033_0 | Clustered           | 21 VC_1033_0 | 21  | 0.8433 | 0.99999998 | 0.8433 | 0 | 0 | 0 | 1 Ref      |
| MK249180 | Unassigned | Unassigned | Unassigned | 1108_0 | Clustered           | 52 VC_1108_0 | 52  | 0.7674 | 1          | 0.7674 | 0 | 0 | 0 | 1 Ref      |
| MK249181 | Unassigned | Unassigned | Unassigned | 1033_0 | Clustered           | 21 VC_1033_0 | 21  | 0.8433 | 0.99999998 | 0.8433 | 0 | 0 | 0 | 1 Ref      |
| MK249185 | Unassigned | Unassigned | Unassigned | 1028_0 | Clustered           | 69 VC_1028_0 | 69  | 0.8547 | 1          | 0.8547 | 0 | 0 | 0 | 1 Ref      |
| MK249188 | Unassigned | Unassigned | Unassigned | 1108_0 | Clustered           | 52 VC_1108_0 | 52  | 0.7674 | 1          | 0.7674 | 0 | 0 | 0 | 1 Ref      |
| MK249189 | Unassigned | Unassigned | Unassigned | 1032_0 | Clustered           | 2 VC_1032_0  | 2   | 0.0274 | 0.73989325 | 0.0202 | 0 | 0 | 0 | 1 Ref      |
| MK249190 | Unassigned | Unassigned | Unassigned | 1028_0 | Clustered           | 69 VC_1028_0 | 69  | 0.8547 | 1          | 0.8547 | 0 | 0 | 0 | 1 Ref      |
| MK249191 | Unassigned | Unassigned | Unassigned | 1110_0 | Clustered           | 2 VC_1110_0  | 2   | 0.0455 | 0.92554266 | 0.0422 | 0 | 0 | 0 | 1 Ref      |
| MK249192 | Unassigned | Unassigned | Unassigned | 1108_0 | Clustered           | 52 VC_1108_0 | 52  | 0.7674 | 1          | 0.7674 | 0 | 0 | 0 | 1 Ref      |
| MK249194 | Unassigned | Unassigned | Unassigned | 1108_0 | Clustered           | 52 VC_1108_0 | 52  | 0.7674 | 1          | 0.7674 | 0 | 0 | 0 | 1 Ref      |
| MK249195 | Unassigned | Unassigned | Unassigned | 1108_0 | Clustered           | 52 VC_1108_0 | 52  | 0.7674 | 1          | 0.7674 | 0 | 0 | 0 | 1 Ref      |
| MK249196 | Unassigned | Unassigned | Unassigned | 1108_0 | Clustered           | 52 VC_1108_0 | 52  | 0.7674 | 1          | 0.7674 | 0 | 0 | 0 | 1 Ref      |
| MK249197 | Unassigned | Unassigned | Unassigned | 1028_0 | Clustered           | 69 VC_1028_0 | 69  | 0.8547 | 1          | 0.8547 | 0 | 0 | 0 | 1 Ref      |
| MK249198 | Unassigned | Unassigned | Unassigned | 1108_0 | Clustered           | 52 VC_1108_0 | 52  | 0.7674 | 1          | 0.7674 | 0 | 0 | 0 | 1 Ref      |
| MK249199 | Unassigned | Unassigned | Unassigned | 1104_0 | Clustered           | 44 VC_1104_0 | 44  | 0.9574 | 0.72818579 | 0.6972 | 0 | 0 | 0 | 1 Ref      |
| MK249201 | Unassigned | Unassigned | Unassigned | 1028_0 | Clustered           | 69 VC_1028_0 | 69  | 0.8547 | 1          | 0.8547 | 0 | 0 | 0 | 1 Ref      |
| MK249202 | Unassigned | Unassigned | Unassigned | 1028_0 | Clustered           | 69 VC_1028_0 | 69  | 0.8547 | 1          | 0.8547 | 0 | 0 | 0 | 1 Ref      |
| MK249203 | Unassigned | Unassigned | Unassigned | 1028_0 | Clustered           | 69 VC_1028_0 | 69  | 0.8547 | 1          | 0.8547 | 0 | 0 | 0 | 1 Ref      |
| MK249204 | Unassigned | Unassigned | Unassigned | 1108_0 | Clustered           | 52 VC_1108_0 | 52  | 0.7674 | 1          | 0.7674 | 0 | 0 | 0 | 1 Ref      |
| MK249205 | Unassigned | Unassigned | Unassigned | 1109_0 | Clustered           | 2 VC_1109_0  | 2   | 0.0119 | 0.85807772 | 0.0102 | 0 | 0 | 0 | 1 Ref      |
| MK249207 | Unassigned | Unassigned | Unassigned | 1104_0 | Clustered           | 44 VC_1104_0 | 44  | 0.9574 | 0.72818579 | 0.6972 | 0 | 0 | 0 | 1 Ref      |
| MK249208 | Unassigned | Unassigned | Unassigned | 1104_0 | Clustered           | 44 VC_1104_0 | 44  | 0.9574 | 0.72818579 | 0.6972 | 0 | 0 | 0 | 1 Ref      |
| MK249211 | Unassigned | Unassigned | Unassigned | 1028_0 | Clustered           | 69 VC_1028_0 | 69  | 0.8547 | 1          | 0.8547 | 0 | 0 | 0 | 1 Ref      |
| MK249212 | Unassigned | Unassigned | Unassigned | 1108_0 | Clustered           | 52 VC_1108_0 | 52  | 0.7674 | 1          | 0.7674 | 0 | 0 | 0 | 1 Ref      |
| MK249213 | Unassigned | Unassigned | Unassigned | 1028_0 | Clustered           | 69 VC_1028_0 | 69  | 0.8547 | 1          | 0.8547 | 0 | 0 | 0 | 1 Ref      |
| MK249214 | Unassigned | Unassigned | Unassigned | 1108_0 | Clustered           | 52 VC_1108_0 | 52  | 0.7674 | 1          | 0.7674 | 0 | 0 | 0 | 1 Ref      |
| MK249215 | Unassigned | Unassigned | Unassigned | 1129_0 | Clustered           | 5 VC_1129_0  | 5   | 0.8077 | 0.98759579 | 0.7976 | 0 | 0 | 0 | 1 Ref      |
| MK249216 | Unassigned | Unassigned | Unassigned | 1429_0 | Clustered           | 3 VC_1429_0  | 3   | 1      | 1          | 1      | 0 | 0 | 0 | 1 Ref      |
| MK249217 | Unassigned | Unassigned | Unassigned | 1429_0 | Clustered           | 3 VC_1429_0  | 3   | 1      | 1          | 1      | 0 | 0 | 0 | 1 Ref      |
| MK249218 | Unassigned | Unassigned | Unassigned | 1402_0 | Clustered           | 7 VC_1402_0  | 7   | 0.9174 | 0.99772305 | 0.9153 | 0 | 0 | 0 | 1 Ref      |
| MK249219 | Unassigned | Unassigned | Unassigned | 1108_0 | Clustered           | 52 VC_1108_0 | 52  | 0.7674 | 1          | 0.7674 | 0 | 0 | 0 | 1 Ref      |
| MK249221 | Unassigned | Unassigned | Unassigned | 1028_0 | Clustered           | 69 VC_1028_0 | 69  | 0.8547 | 1          | 0.8547 | 0 | 0 | 0 | 1 Ref      |
| MK249222 | Unassigned | Unassigned | Unassigned | 1111_0 | Clustered           | 5 VC_1111_0  | 5   | 1      | 1          | 1      | 0 | 0 | 0 | 1 Ref      |
| MK249223 | Unassigned | Unassigned | Unassigned | 411_0  | Clustered           | 48 VC_411_0  | 48  | 0.4808 | 1          | 0.4808 | 0 | 0 | 0 | 1 Ref      |
| MK249228 | Unassigned | Unassigned | Unassigned | 1104_0 | Clustered           | 44 VC_1104_0 | 44  | 0.9574 | 0.72818579 | 0.6972 | 0 | 0 | 0 | 1 Ref      |
| MK249229 | Unassigned | Unassigned | Unassigned | 1402_0 | Clustered           | 7 VC_1402_0  | 7   | 0.9174 | 0.99772305 | 0.9153 | 0 | 0 | 0 | 1 Ref      |
| MK249231 | Unassigned | Unassigned | Unassigned | 411_0  | Clustered           | 48 VC_411_0  | 48  | 0.4808 | 1          | 0.4808 | 0 | 0 | 0 | 1 Ref      |
| MK249232 | Unassigned | Unassigned | Unassigned | 1104_0 | Clustered           | 44 VC_1104_0 | 44  | 0.9574 | 0.72818579 | 0.6972 | 0 | 0 | 0 | 1 Ref      |
| MK249233 | Unassigned | Unassigned | Unassigned | 1402_0 | Clustered           | 7 VC_1402_0  | 7   | 0.9174 | 0.99772305 | 0.9153 | 0 | 0 | 0 | 1 Ref      |



|          |            |            |            |        |           |              |    |        |            |        |   |   |   |            |
|----------|------------|------------|------------|--------|-----------|--------------|----|--------|------------|--------|---|---|---|------------|
| MK249308 | Unassigned | Unassigned | Unassigned | 611_0  | Clustered | 50 VC_611_0  | 50 | 0.7306 | 1          | 0.7306 | 0 | 0 | 0 | 1 Ref      |
| MK249872 | Unassigned | Unassigned | Unassigned | 662_0  | Clustered | 2 VC_662_0   | 2  | 0.1082 | 0.95085347 | 0.1029 | 0 | 0 | 0 | 1 Ref      |
| MK250015 | Unassigned | Unassigned | Unassigned | 1257_2 | Clustered | 4 VC_1257_2  | 4  | 0.1181 | 0.96596457 | 0.1141 | 0 | 0 | 0 | 1 Ref      |
| MK250016 | Unassigned | Unassigned | Unassigned | 1257_2 | Clustered | 4 VC_1257_2  | 4  | 0.1181 | 0.96596457 | 0.1141 | 0 | 0 | 0 | 1 Ref      |
| MK250017 | Unassigned | Unassigned | Unassigned | 1257_2 | Clustered | 4 VC_1257_2  | 4  | 0.1181 | 0.96596457 | 0.1141 | 0 | 0 | 0 | 1 Ref      |
| MK250018 | Unassigned | Unassigned | Unassigned | 1257_2 | Clustered | 4 VC_1257_2  | 4  | 0.1181 | 0.96596457 | 0.1141 | 0 | 0 | 0 | 1 Ref      |
| MK250019 | Unassigned | Unassigned | Unassigned | 1257_3 | Clustered | 2 VC_1257_3  | 2  | 0.0365 | 0.74212829 | 0.0271 | 0 | 0 | 0 | 0 Ref      |
| MK250020 | Unassigned | Unassigned | Unassigned | 1257_1 | Clustered | 7 VC_1257_1  | 7  | 0.2689 | 0.99956545 | 0.2688 | 0 | 0 | 0 | 1 Ref      |
| MK250021 | Unassigned | Unassigned | Unassigned | 1257_0 | Clustered | 2 VC_1257_0  | 2  | 0.0366 | 0.70502008 | 0.0258 | 0 | 0 | 0 | 1 Ref      |
| MK250022 | Unassigned | Unassigned | Unassigned | 1257_1 | Clustered | 7 VC_1257_1  | 7  | 0.2689 | 0.99956545 | 0.2688 | 0 | 0 | 0 | 1 Ref      |
| MK250023 | Unassigned | Unassigned | Unassigned | 1257_0 | Clustered | 2 VC_1257_0  | 2  | 0.0366 | 0.70502008 | 0.0258 | 0 | 0 | 0 | 1 Ref      |
| MK250024 | Unassigned | Unassigned | Unassigned | 1257_1 | Clustered | 7 VC_1257_1  | 7  | 0.2689 | 0.99956545 | 0.2688 | 0 | 0 | 0 | 1 Ref      |
| MK250025 | Unassigned | Unassigned | Unassigned | 1257_1 | Clustered | 7 VC_1257_1  | 7  | 0.2689 | 0.99956545 | 0.2688 | 0 | 0 | 0 | 1 Ref      |
| MK250026 | Unassigned | Unassigned | Unassigned | 1257_1 | Clustered | 7 VC_1257_1  | 7  | 0.2689 | 0.99956545 | 0.2688 | 0 | 0 | 0 | 1 Ref      |
| MK250027 | Unassigned | Unassigned | Unassigned | 1257_1 | Clustered | 7 VC_1257_1  | 7  | 0.2689 | 0.99956545 | 0.2688 | 0 | 0 | 0 | 1 Ref      |
| MK250028 | Unassigned | Unassigned | Unassigned | 1257_1 | Clustered | 7 VC_1257_1  | 7  | 0.2689 | 0.99956545 | 0.2688 | 0 | 0 | 0 | 1 Ref      |
| MK250029 | Unassigned | Unassigned | Unassigned | 1257_3 | Clustered | 2 VC_1257_3  | 2  | 0.0365 | 0.74212829 | 0.0271 | 0 | 0 | 0 | 0 Ref      |
| MK250904 | Unassigned | Unassigned | Unassigned | 155_15 | Clustered | 16 VC_155_15 | 16 | 0.0779 | 1          | 0.0779 | 0 | 0 | 0 | 0.8083 Ref |
| MK257719 | Unassigned | Unassigned | Unassigned | 714_0  | Clustered | 71 VC_714_0  | 71 | 0.935  | 1          | 0.935  | 0 | 0 | 0 | 1 Ref      |
| MK257720 | Unassigned | Unassigned | Unassigned | 714_0  | Clustered | 71 VC_714_0  | 71 | 0.935  | 1          | 0.935  | 0 | 0 | 0 | 1 Ref      |
| MK257721 | Unassigned | Unassigned | Unassigned | 714_0  | Clustered | 71 VC_714_0  | 71 | 0.935  | 1          | 0.935  | 0 | 0 | 0 | 1 Ref      |
| MK257722 | Unassigned | Unassigned | Unassigned | 714_0  | Clustered | 71 VC_714_0  | 71 | 0.935  | 1          | 0.935  | 0 | 0 | 0 | 1 Ref      |
| MK257723 | Unassigned | Unassigned | Unassigned | 714_0  | Clustered | 71 VC_714_0  | 71 | 0.935  | 1          | 0.935  | 0 | 0 | 0 | 1 Ref      |
| MK257744 | Unassigned | Unassigned | Unassigned | 493_0  | Clustered | 4 VC_493_0   | 4  | 0.9871 | 0.99748973 | 0.9847 | 0 | 0 | 0 | 1 Ref      |
| MK268344 | Unassigned | Unassigned | Unassigned | 170_0  | Clustered | 3 VC_170_0   | 3  | 0.0298 | 0.82983726 | 0.0247 | 0 | 0 | 0 | 1 Ref      |
| MK268686 | Unassigned | Unassigned | Unassigned | 93_0   | Clustered | 22 VC_93_0   | 22 | 0.5285 | 1          | 0.5285 | 0 | 0 | 0 | 1 Ref      |
| MK278859 | Unassigned | Unassigned | Unassigned | 714_0  | Clustered | 71 VC_714_0  | 71 | 0.935  | 1          | 0.935  | 0 | 0 | 0 | 1 Ref      |
| MK278860 | Unassigned | Unassigned | Unassigned | 510_2  | Clustered | 8 VC_510_2   | 8  | 0.122  | 0.98786574 | 0.1205 | 0 | 0 | 0 | 1 Ref      |
| MK278861 | Unassigned | Unassigned | Unassigned | 972_0  | Clustered | 99 VC_972_0  | 99 | 0.9113 | 1          | 0.9113 | 0 | 0 | 0 | 0.9928 Ref |
| MK279840 | Unassigned | Unassigned | Unassigned | 594_0  | Clustered | 7 VC_594_0   | 7  | 0.2725 | 1          | 0.2725 | 0 | 0 | 0 | 1 Ref      |
| MK279841 | Unassigned | Unassigned | Unassigned | 743_0  | Clustered | 3 VC_743_0   | 3  | 0.3955 | 0.99850259 | 0.3949 | 0 | 0 | 0 | 1 Ref      |
| MK279842 | Unassigned | Unassigned | Unassigned | 973_0  | Clustered | 15 VC_973_0  | 15 | 1      | 0          | 0      | 0 | 0 | 0 | 1 Ref      |
| MK279843 | Unassigned | Unassigned | Unassigned | 384_11 | Clustered | 31 VC_384_11 | 31 | 0.0926 | 1          | 0.0926 | 0 | 0 | 0 | 0.7011 Ref |
| MK279844 | Unassigned | Unassigned | Unassigned | 1200_0 | Clustered | 73 VC_1200_0 | 73 | 0.9825 | 1          | 0.9825 | 0 | 0 | 0 | 1 Ref      |
| MK279845 | Unassigned | Unassigned | Unassigned | 1200_0 | Clustered | 73 VC_1200_0 | 73 | 0.9825 | 1          | 0.9825 | 0 | 0 | 0 | 1 Ref      |
| MK279846 | Unassigned | Unassigned | Unassigned | 384_16 | Clustered | 42 VC_384_16 | 42 | 0.134  | 1          | 0.134  | 0 | 0 | 0 | 0.7282 Ref |
| MK279847 | Unassigned | Unassigned | Unassigned | 1200_0 | Clustered | 73 VC_1200_0 | 73 | 0.9825 | 1          | 0.9825 | 0 | 0 | 0 | 1 Ref      |
| MK279849 | Unassigned | Unassigned | Unassigned | 566_7  | Clustered | 4 VC_566_7   | 4  | 0.0409 | 0.99661604 | 0.0408 | 0 | 0 | 0 | 1 Ref      |
| MK279850 | Unassigned | Unassigned | Unassigned | 384_13 | Clustered | 33 VC_384_13 | 33 | 0.1785 | 1          | 0.1785 | 0 | 0 | 0 | 0.8769 Ref |
| MK279851 | Unassigned | Unassigned | Unassigned | 1200_0 | Clustered | 73 VC_1200_0 | 73 | 0.9825 | 1          | 0.9825 | 0 | 0 | 0 | 1 Ref      |
| MK279852 | Unassigned | Unassigned | Unassigned | 384_16 | Clustered | 42 VC_384_16 | 42 | 0.134  | 1          | 0.134  | 0 | 0 | 0 | 0.7282 Ref |
| MK279853 | Unassigned | Unassigned | Unassigned | 1139_0 | Clustered | 5 VC_1139_0  | 5  | 0.8556 | 0.99869977 | 0.8545 | 0 | 0 | 0 | 1 Ref      |
| MK279854 | Unassigned | Unassigned | Unassigned | 1200_0 | Clustered | 73 VC_1200_0 | 73 | 0.9825 | 1          | 0.9825 | 0 | 0 | 0 | 1 Ref      |
| MK279855 | Unassigned | Unassigned | Unassigned | 384_15 | Clustered | 44 VC_384_15 | 44 | 0.139  | 1          | 0.139  | 0 | 0 | 0 | 0.7474 Ref |
| MK279856 | Unassigned | Unassigned | Unassigned | 1200_0 | Clustered | 73 VC_1200_0 | 73 | 0.9825 | 1          | 0.9825 | 0 | 0 | 0 | 1 Ref      |
| MK279857 | Unassigned | Unassigned | Unassigned | 224_0  | Clustered | 5 VC_224_0   | 5  | 0.0685 | 0.99999998 | 0.0685 | 0 | 0 | 0 | 1 Ref      |
| MK279858 | Unassigned | Unassigned | Unassigned | 384_13 | Clustered | 33 VC_384_13 | 33 | 0.1785 | 1          | 0.1785 | 0 | 0 | 0 | 0.8769 Ref |
| MK279859 | Unassigned | Unassigned | Unassigned | 384_15 | Clustered | 44 VC_384_15 | 44 | 0.139  | 1          | 0.139  | 0 | 0 | 0 | 0.7474 Ref |
| MK279860 | Unassigned | Unassigned | Unassigned | 1200_0 | Clustered | 73 VC_1200_0 | 73 | 0.9825 | 1          | 0.9825 | 0 | 0 | 0 | 1 Ref      |
| MK279861 | Unassigned | Unassigned | Unassigned | 384_15 | Clustered | 44 VC_384_15 | 44 | 0.139  | 1          | 0.139  | 0 | 0 | 0 | 0.7474 Ref |
| MK279862 | Unassigned | Unassigned | Unassigned | 1200_0 | Clustered | 73 VC_1200_0 | 73 | 0.9825 | 1          | 0.9825 | 0 | 0 | 0 | 1 Ref      |
| MK279863 | Unassigned | Unassigned | Unassigned | 1200_0 | Clustered | 73 VC_1200_0 | 73 | 0.9825 | 1          | 0.9825 | 0 | 0 | 0 | 1 Ref      |
| MK279864 | Unassigned | Unassigned | Unassigned | 384_13 | Clustered | 33 VC_384_13 | 33 | 0.1785 | 1          | 0.1785 | 0 | 0 | 0 | 0.8769 Ref |
| MK279865 | Unassigned | Unassigned | Unassigned | 384_11 | Clustered | 31 VC_384_11 | 31 | 0.0926 | 1          | 0.0926 | 0 | 0 | 0 | 0.7011 Ref |
| MK279866 | Unassigned | Unassigned | Unassigned | 384_15 | Clustered | 44 VC_384_15 | 44 | 0.139  | 1          | 0.139  | 0 | 0 | 0 | 0.7474 Ref |
| MK279867 | Unassigned | Unassigned | Unassigned | 1200_0 | Clustered | 73 VC_1200_0 | 73 | 0.9825 | 1          | 0.9825 | 0 | 0 | 0 | 1 Ref      |
| MK279868 | Unassigned | Unassigned | Unassigned | 1200_0 | Clustered | 73 VC_1200_0 | 73 | 0.9825 | 1          | 0.9825 | 0 | 0 | 0 | 1 Ref      |
| MK279869 | Unassigned | Unassigned | Unassigned | 1200_0 | Clustered | 73 VC_1200_0 | 73 | 0.9825 | 1          | 0.9825 | 0 | 0 | 0 | 1 Ref      |
| MK279870 | Unassigned | Unassigned | Unassigned | 384_11 | Clustered | 31 VC_384_11 | 31 | 0.0926 | 1          | 0.0926 | 0 | 0 | 0 | 0.7011 Ref |
| MK279871 | Unassigned | Unassigned | Unassigned | 384_16 | Clustered | 42 VC_384_16 | 42 | 0.134  | 1          | 0.134  | 0 | 0 | 0 | 0.7282 Ref |
| MK279872 | Unassigned | Unassigned | Unassigned | 1200_0 | Clustered | 73 VC_1200_0 | 73 | 0.9825 | 1          | 0.9825 | 0 | 0 | 0 | 1 Ref      |
| MK279873 | Unassigned | Unassigned | Unassigned | 384_11 | Clustered | 31 VC_384_11 | 31 | 0.0926 | 1          | 0.0926 | 0 | 0 | 0 | 0.7011 Ref |
| MK279874 | Unassigned | Unassigned | Unassigned | 1200_0 | Clustered | 73 VC_1200_0 | 73 | 0.9825 | 1          | 0.9825 | 0 | 0 | 0 | 1 Ref      |
| MK279875 | Unassigned | Unassigned | Unassigned | 1200_0 | Clustered | 73 VC_1200_0 | 73 | 0.9825 | 1          | 0.9825 | 0 | 0 | 0 | 1 Ref      |
| MK279876 | Unassigned | Unassigned | Unassigned | 1200_0 | Clustered | 73 VC_1200_0 | 73 | 0.9825 | 1          | 0.9825 | 0 | 0 | 0 | 1 Ref      |
| MK279877 | Unassigned | Unassigned | Unassigned | 384_3  | Clustered | 22 VC_384_3  | 22 | 0.0786 | 1          | 0.0786 | 0 | 0 | 0 | 0.9048 Ref |
| MK279878 | Unassigned | Unassigned | Unassigned | 384_11 | Clustered | 31 VC_384_11 | 31 | 0.0926 | 1          | 0.0926 | 0 | 0 | 0 | 0.7011 Ref |
| MK279879 | Unassigned | Unassigned | Unassigned | 384_15 | Clustered | 44 VC_384_15 | 44 | 0.139  | 1          | 0.139  | 0 | 0 | 0 | 0.7474 Ref |
| MK279880 | Unassigned | Unassigned | Unassigned | 1200_0 | Clustered | 73 VC_1200_0 | 73 | 0.9825 | 1          | 0.9825 | 0 | 0 | 0 | 1 Ref      |
| MK279881 | Unassigned | Unassigned | Unassigned | 384_15 | Clustered | 44 VC_384_15 | 44 | 0.139  | 1          | 0.139  | 0 | 0 | 0 | 0.7474 Ref |
| MK279882 | Unassigned | Unassigned | Unassigned | 384_15 | Clustered | 44 VC_384_15 | 44 | 0.139  | 1          | 0.139  | 0 | 0 | 0 | 0.7474 Ref |
| MK279883 | Unassigned | Unassigned | Unassigned | 384_13 | Clustered | 33 VC_384_13 | 33 | 0.1785 | 1          | 0.1785 | 0 | 0 | 0 | 0.8769 Ref |
| MK279884 | Unassigned | Unassigned | Unassigned | 1200_0 | Clustered | 73 VC_1200_0 | 73 | 0.9825 | 1          | 0.9825 | 0 | 0 | 0 | 1 Ref      |
| MK279885 | Unassigned | Unassigned | Unassigned | 384_15 | Clustered | 44 VC_384_15 | 44 | 0.139  | 1          | 0.139  | 0 | 0 | 0 | 0.7474 Ref |
| MK279886 | Unassigned | Unassigned | Unassigned | 1200_0 | Clustered | 73 VC_1200_0 | 73 | 0.9825 | 1          | 0.9825 | 0 | 0 | 0 | 1 Ref      |
| MK279887 | Unassigned | Unassigned | Unassigned | 384_15 | Clustered | 44 VC_384_15 | 44 | 0.139  | 1          | 0.139  | 0 | 0 | 0 | 0.7474 Ref |
| MK279888 | Unassigned | Unassigned | Unassigned | 384_15 | Clustered | 44 VC_384_15 | 44 | 0.139  | 1          | 0.139  | 0 | 0 | 0 | 0.7474 Ref |
| MK279889 | Unassigned | Unassigned | Unassigned | 384_2  | Clustered | 8 VC_384_2   | 8  | 0.0232 | 1          | 0.0232 | 0 | 0 | 0 | 0.8571 Ref |
| MK279890 | Unassigned | Unassigned | Unassigned | 384_13 | Clustered | 33 VC_384_13 | 33 | 0.1785 | 1          | 0.1785 | 0 | 0 | 0 | 0.8769 Ref |
| MK279891 | Unassigned | Unassigned | Unassigned | 384_13 | Clustered | 33 VC_384_13 | 33 | 0.1785 | 1          | 0.1785 | 0 | 0 | 0 | 0.8769 Ref |
| MK279892 | Unassigned | Unassigned | Unassigned | 1200_0 | Clustered | 73 VC_1200_0 | 73 | 0.9825 | 1          | 0.9825 | 0 | 0 | 0 | 1 Ref      |



|          |            |            |            |         |                     |              |     |        |            |        |   |   |   |            |
|----------|------------|------------|------------|---------|---------------------|--------------|-----|--------|------------|--------|---|---|---|------------|
| MK279893 | Unassigned | Unassigned | Unassigned | 989_0   | Clustered           | 13 VC_989_0  | 13  | 0.8622 | 1          | 0.8622 | 0 | 0 | 0 | 1 Ref      |
| MK279894 | Unassigned | Unassigned | Unassigned | 384_11  | Clustered           | 31 VC_384_11 | 31  | 0.0926 | 1          | 0.0926 | 0 | 0 | 0 | 0.7011 Ref |
| MK279895 | Unassigned | Unassigned | Unassigned | 384_11  | Clustered           | 31 VC_384_11 | 31  | 0.0926 | 1          | 0.0926 | 0 | 0 | 0 | 0.7011 Ref |
| MK279896 | Unassigned | Unassigned | Unassigned | 1200_0  | Clustered           | 73 VC_1200_0 | 73  | 0.9825 | 1          | 0.9825 | 0 | 0 | 0 | 1 Ref      |
| MK279897 | Unassigned | Unassigned | Unassigned | 384_11  | Clustered           | 31 VC_384_11 | 31  | 0.0926 | 1          | 0.0926 | 0 | 0 | 0 | 0.7011 Ref |
| MK279898 | Unassigned | Unassigned | Unassigned | 535_0   | Clustered           | 18 VC_535_0  | 18  | 0.1595 | 1          | 0.1595 | 0 | 0 | 0 | 1 Ref      |
| MK279900 | Unassigned | Unassigned | Unassigned | 952_0   | Clustered           | 39 VC_952_0  | 39  | 0.9064 | 1          | 0.9064 | 0 | 0 | 0 | 1 Ref      |
| MK279901 | Unassigned | Unassigned | Unassigned | 1200_0  | Clustered           | 73 VC_1200_0 | 73  | 0.9825 | 1          | 0.9825 | 0 | 0 | 0 | 1 Ref      |
| MK279902 | Unassigned | Unassigned | Unassigned | 535_1   | Clustered           | 108 VC_535_1 | 108 | 0.8479 | 1          | 0.8479 | 0 | 0 | 0 | 0.9955 Ref |
| MK279903 | Unassigned | Unassigned | Unassigned | 532_0   | Clustered           | 75 VC_532_0  | 75  | 0.9393 | 1          | 0.9393 | 0 | 0 | 0 | 1 Ref      |
| MK279904 | Unassigned | Unassigned | Unassigned | 384_4   | Clustered           | 5 VC_384_4   | 5   | 0.0134 | 0.99999971 | 0.0134 | 0 | 0 | 0 | 1 Ref      |
| MK279906 | Unassigned | Unassigned | Unassigned | 578_1   | Clustered           | 11 VC_578_1  | 11  | 0.4919 | 1          | 0.4919 | 0 | 0 | 0 | 0.7818 Ref |
| MK279907 | Unassigned | Unassigned | Unassigned | 1200_0  | Clustered           | 73 VC_1200_0 | 73  | 0.9825 | 1          | 0.9825 | 0 | 0 | 0 | 1 Ref      |
| MK279908 | Unassigned | Unassigned | Unassigned | 384_3   | Clustered           | 22 VC_384_3  | 22  | 0.0786 | 1          | 0.0786 | 0 | 0 | 0 | 0.9048 Ref |
| MK279909 | Unassigned | Unassigned | Unassigned | 586_0   | Clustered           | 2 VC_586_0   | 2   | 0.098  | 0.95623977 | 0.0937 | 0 | 0 | 0 | 1 Ref      |
| MK279910 | Unassigned | Unassigned | Unassigned | 384_1   | Clustered           | 11 VC_384_1  | 11  | 0.0378 | 1          | 0.0378 | 0 | 0 | 0 | 0.8545 Ref |
| MK279911 | Unassigned | Unassigned | Unassigned | 1216_0  | Clustered           | 22 VC_1216_0 | 22  | 0.4546 | 1          | 0.4546 | 0 | 0 | 0 | 1 Ref      |
| MK279912 | Unassigned | Unassigned | Unassigned | 1216_0  | Clustered           | 22 VC_1216_0 | 22  | 0.4546 | 1          | 0.4546 | 0 | 0 | 0 | 1 Ref      |
| MK279913 | Unassigned | Unassigned | Unassigned | 532_0   | Clustered           | 75 VC_532_0  | 75  | 0.9393 | 1          | 0.9393 | 0 | 0 | 0 | 1 Ref      |
| MK284518 | Unassigned | Unassigned | Unassigned | 532_0   | Clustered           | 75 VC_532_0  | 75  | 0.9393 | 1          | 0.9393 | 0 | 0 | 0 | 1 Ref      |
| MK284519 | Unassigned | Unassigned | Unassigned | 531_0   | Clustered           | 32 VC_531_0  | 32  | 0.6859 | 1          | 0.6859 | 0 | 0 | 0 | 1 Ref      |
| MK284520 | Unassigned | Unassigned | Unassigned | 701_0   | Clustered           | 16 VC_701_0  | 16  | 0.2957 | 1          | 0.2957 | 0 | 0 | 0 | 0.9167 Ref |
| MK284521 | Unassigned | Unassigned | Unassigned | 1218_0  | Clustered           | 14 VC_1218_0 | 14  | 0.7811 | 1          | 0.7811 | 0 | 0 | 0 | 0.989 Ref  |
| MK284522 | Unassigned | Unassigned | Unassigned | 223_4   | Clustered           | 13 VC_223_4  | 13  | 0.1649 | 1          | 0.1649 | 0 | 0 | 0 | 1 Ref      |
| MK284526 | Unassigned | Unassigned | Unassigned | 843_0   | Clustered           | 20 VC_843_0  | 20  | 0.9621 | 1          | 0.9621 | 0 | 0 | 0 | 1 Ref      |
| MK284527 | Unassigned | Unassigned | Unassigned | 843_0   | Clustered           | 20 VC_843_0  | 20  | 0.9621 | 1          | 0.9621 | 0 | 0 | 0 | 1 Ref      |
| MK284528 | Unassigned | Unassigned | Unassigned | 843_0   | Clustered           | 20 VC_843_0  | 20  | 0.9621 | 1          | 0.9621 | 0 | 0 | 0 | 1 Ref      |
| MK286578 | Unassigned | Unassigned | Unassigned | 611_0   | Clustered           | 50 VC_611_0  | 50  | 0.7306 | 1          | 0.7306 | 0 | 0 | 0 | 1 Ref      |
| MK288021 | Unassigned | Unassigned | Unassigned | 489_8   | Clustered           | 2 VC_489_8   | 2   | 0.0291 | 0.90088011 | 0.0262 | 0 | 0 | 0 | 1 Ref      |
| MK288022 | Unassigned | Unassigned | Unassigned | 1042_0  | Clustered           | 8 VC_1042_0  | 8   | 0.7385 | 1          | 0.7385 | 0 | 0 | 0 | 1 Ref      |
| MK290737 | Unassigned | Unassigned | Unassigned | 342_0   | Clustered           | 4 VC_342_0   | 4   | 0.0875 | 0.99998775 | 0.0875 | 0 | 0 | 0 | 1 Ref      |
| MK290738 | Unassigned | Unassigned | Unassigned | 342_0   | Clustered           | 4 VC_342_0   | 4   | 0.0875 | 0.99998775 | 0.0875 | 0 | 0 | 0 | 1 Ref      |
| MK290764 | Unassigned | Unassigned | Unassigned | 12_0    | Clustered           | 21 VC_12_0   | 21  | 0.2262 | 1          | 0.2262 | 0 | 0 | 0 | 0.9571 Ref |
| MK291441 | Unassigned | Unassigned | Unassigned | 982_0   | Clustered           | 3 VC_982_0   | 3   | 0.5537 | 0.96587626 | 0.5348 | 0 | 0 | 0 | 1 Ref      |
| MK291442 | Unassigned | Unassigned | Unassigned | 955_0   | Clustered           | 2 VC_955_0   | 2   | 0.2751 | 0.89435023 | 0.2461 | 0 | 0 | 0 | 1 Ref      |
| MK291443 | Unassigned | Unassigned | Unassigned | 982_0   | Clustered           | 3 VC_982_0   | 3   | 0.5537 | 0.96587626 | 0.5348 | 0 | 0 | 0 | 1 Ref      |
| MK291444 | Unassigned | Unassigned | Unassigned | 982_0   | Clustered           | 3 VC_982_0   | 3   | 0.5537 | 0.96587626 | 0.5348 | 0 | 0 | 0 | 1 Ref      |
| MK295203 | Unassigned | Unassigned | Unassigned | 297_7   | Clustered/Singleton | 1 VC_297_7   | 1   | 0      | 1          | 0      | 0 | 1 | 0 | 1 Ref      |
| MK295204 | Unassigned | Unassigned | Unassigned | 295_2   | Clustered           | 2 VC_295_2   | 2   | 0.0224 | 0.95539992 | 0.0214 | 0 | 0 | 0 | 1 Ref      |
| MK301437 | Unassigned | Unassigned | Unassigned | 210_0   | Clustered           | 105 VC_210_0 | 105 | 0.4076 | 1          | 0.4076 | 0 | 0 | 0 | 0.7766 Ref |
| MK301442 | Unassigned | Unassigned | Unassigned | 706_0   | Clustered           | 52 VC_706_0  | 52  | 0.9787 | 1          | 0.9787 | 0 | 0 | 0 | 1 Ref      |
| MK301443 | Unassigned | Unassigned | Unassigned | 706_0   | Clustered           | 52 VC_706_0  | 52  | 0.9787 | 1          | 0.9787 | 0 | 0 | 0 | 1 Ref      |
| MK301532 | Unassigned | Unassigned | Unassigned | 465_0   | Clustered           | 80 VC_465_0  | 80  | 0.9988 | 1          | 0.9988 | 0 | 0 | 0 | 1 Ref      |
| MK305884 | Unassigned | Unassigned | Unassigned | 783_0   | Clustered           | 67 VC_783_0  | 67  | 0.8945 | 1          | 0.8945 | 0 | 0 | 0 | 1 Ref      |
| MK305885 | Unassigned | Unassigned | Unassigned | 989_0   | Clustered           | 13 VC_989_0  | 13  | 0.8622 | 1          | 0.8622 | 0 | 0 | 0 | 1 Ref      |
| MK305887 | Unassigned | Unassigned | Unassigned | 974_0   | Clustered           | 34 VC_974_0  | 34  | 0.7953 | 1          | 0.7953 | 0 | 0 | 0 | 1 Ref      |
| MK305888 | Unassigned | Unassigned | Unassigned | 742_0   | Clustered           | 11 VC_742_0  | 11  | 0.5046 | 1          | 0.5046 | 0 | 0 | 0 | 1 Ref      |
| MK305889 | Unassigned | Unassigned | Unassigned | 1219_0  | Clustered           | 24 VC_1219_0 | 24  | 0.9519 | 1          | 0.9519 | 0 | 0 | 0 | 1 Ref      |
| MK305890 | Unassigned | Unassigned | Unassigned | 1436_0  | Clustered           | 3 VC_1436_0  | 3   | 0.9803 | 0.9595722  | 0.9406 | 0 | 0 | 0 | 1 Ref      |
| MK305891 | Unassigned | Unassigned | Unassigned | 885_0   | Clustered           | 9 VC_885_0   | 9   | 0.9403 | 1          | 0.9403 | 0 | 0 | 0 | 1 Ref      |
| MK305892 | Unassigned | Unassigned | Unassigned | 973_0   | Clustered           | 15 VC_973_0  | 15  | 1      | 0          | 0      | 0 | 0 | 0 | 1 Ref      |
| MK305893 | Unassigned | Unassigned | Unassigned | 335_55  | Clustered           | 2 VC_335_55  | 2   | 0.006  | 0.95750995 | 0.0058 | 0 | 0 | 0 | 1 Ref      |
| MK308637 | Unassigned | Unassigned | Unassigned | 1203_0  | Clustered           | 28 VC_1203_0 | 28  | 0.4905 | 1          | 0.4905 | 0 | 0 | 0 | 1 Ref      |
| MK308638 | Unassigned | Unassigned | Unassigned | 1424_0  | Clustered           | 31 VC_1424_0 | 31  | 0.8834 | 1          | 0.8834 | 0 | 0 | 0 | 1 Ref      |
| MK308674 | Unassigned | Unassigned | Unassigned | 358_0   | Clustered           | 4 VC_358_0   | 4   | 0.453  | 0.99997974 | 0.453  | 0 | 0 | 0 | 1 Ref      |
| MK308675 | Unassigned | Unassigned | Unassigned | 358_0   | Clustered           | 4 VC_358_0   | 4   | 0.453  | 0.99997974 | 0.453  | 0 | 0 | 0 | 1 Ref      |
| MK308676 | Unassigned | Unassigned | Unassigned | 358_0   | Clustered           | 4 VC_358_0   | 4   | 0.453  | 0.99997974 | 0.453  | 0 | 0 | 0 | 1 Ref      |
| MK308677 | Unassigned | Unassigned | Unassigned | 358_0   | Clustered           | 4 VC_358_0   | 4   | 0.453  | 0.99997974 | 0.453  | 0 | 0 | 0 | 1 Ref      |
| MK310138 | Unassigned | Unassigned | Unassigned | 244_0   | Clustered           | 4 VC_244_0   | 4   | 0.0426 | 0.99998759 | 0.0426 | 0 | 0 | 0 | 1 Ref      |
| MK310139 | Unassigned | Unassigned | Unassigned | 384_5   | Clustered           | 2 VC_384_5   | 2   | 0.0035 | 0.95771071 | 0.0033 | 0 | 0 | 0 | 1 Ref      |
| MK310140 | Unassigned | Unassigned | Unassigned | 532_0   | Clustered           | 75 VC_532_0  | 75  | 0.9393 | 1          | 0.9393 | 0 | 0 | 0 | 1 Ref      |
| MK310141 | Unassigned | Unassigned | Unassigned | 335_16  | Clustered           | 2 VC_335_16  | 2   | 0.0094 | 0.95751393 | 0.009  | 0 | 0 | 0 | 1 Ref      |
| MK310142 | Unassigned | Unassigned | Unassigned | 335_61  | Clustered           | 8 VC_335_61  | 8   | 0.0394 | 1          | 0.0394 | 0 | 0 | 0 | 0.7857 Ref |
| MK310143 | Unassigned | Unassigned | Unassigned | 579_32  | Clustered/Singleton | 1 VC_579_32  | 1   | 0      | 1          | 0      | 0 | 0 | 0 | 1 Ref      |
| MK310145 | Unassigned | Unassigned | Unassigned | 535_1   | Clustered           | 108 VC_535_1 | 108 | 0.8479 | 1          | 0.8479 | 0 | 0 | 0 | 0.9955 Ref |
| MK310146 | Unassigned | Unassigned | Unassigned | 783_0   | Clustered           | 67 VC_783_0  | 67  | 0.8945 | 1          | 0.8945 | 0 | 0 | 0 | 1 Ref      |
| MK310182 | Unassigned | Unassigned | Unassigned | 405_0   | Clustered           | 126 VC_405_0 | 126 | 0.9614 | 1          | 0.9614 | 0 | 0 | 0 | 1 Ref      |
| MK310183 | Unassigned | Unassigned | Unassigned | 837_0   | Clustered           | 12 VC_837_0  | 12  | 0.2327 | 1          | 0.2327 | 0 | 0 | 0 | 1 Ref      |
| MK310184 | Unassigned | Unassigned | Unassigned | 297_6   | Clustered           | 12 VC_297_6  | 12  | 0.1139 | 1          | 0.1139 | 0 | 0 | 0 | 0.8182 Ref |
| MK317959 | Unassigned | Unassigned | Unassigned | 81_0    | Clustered           | 41 VC_81_0   | 41  | 0.5815 | 1          | 0.5815 | 0 | 0 | 0 | 0.9805 Ref |
| MK318076 | Unassigned | Unassigned | Unassigned | 80_7    | Clustered           | 33 VC_80_7   | 33  | 0.2156 | 1          | 0.2156 | 0 | 0 | 0 | 0.8409 Ref |
| MK318083 | Unassigned | Unassigned | Unassigned | 203_1   | Clustered/Singleton | 1 VC_203_1   | 1   | 0      | 1          | 0      | 0 | 0 | 0 | 1 Ref      |
| MK327140 | Unassigned | Unassigned | Unassigned | 474_0   | Clustered           | 19 VC_474_0  | 19  | 0.3729 | 1          | 0.3729 | 0 | 0 | 0 | 1 Ref      |
| MK327928 | Unassigned | Unassigned | Unassigned | 290_18  | Clustered/Singleton | 1 VC_290_18  | 1   | 0      | 1          | 0      | 0 | 0 | 0 | 1 Ref      |
| MK327929 | Unassigned | Unassigned | Unassigned | 290_127 | Clustered/Singleton | 1 VC_290_127 | 1   | 0      | 1          | 0      | 0 | 0 | 0 | 1 Ref      |
| MK327930 | Unassigned | Unassigned | Unassigned | 794_19  | Clustered           | 16 VC_794_19 | 16  | 0.0975 | 0.99616626 | 0.0971 | 0 | 0 | 0 | 0.8083 Ref |
| MK327931 | Unassigned | Unassigned | Unassigned | 170_11  | Clustered           | 10 VC_170_11 | 10  | 0.1502 | 0.99999797 | 0.1502 | 0 | 0 | 0 | 0.9111 Ref |
| MK327932 | Unassigned | Unassigned | Unassigned | 609_0   | Clustered           | 27 VC_609_0  | 27  | 0.9943 | 1          | 0.9943 | 0 | 0 | 0 | 1 Ref      |
| MK327933 | Unassigned | Unassigned | Unassigned | 293_4   | Clustered/Singleton | 1 VC_293_4   | 1   | 0      | 1          | 0      | 0 | 0 | 0 | 1 Ref      |
| MK327934 | Unassigned | Unassigned | Unassigned | 293_1   | Clustered           | 21 VC_293_1  | 21  | 0.1694 | 1          | 0.1694 | 0 | 0 | 0 | 0.9048 Ref |
| MK327935 | Unassigned | Unassigned | Unassigned | 609_0   | Clustered           | 27 VC_609_0  | 27  | 0.9943 | 1          | 0.9943 | 0 | 0 | 0 | 1 Ref      |



|          |            |            |            |         |                     |              |     |        |            |        |   |   |   |            |
|----------|------------|------------|------------|---------|---------------------|--------------|-----|--------|------------|--------|---|---|---|------------|
| MK327936 | Unassigned | Unassigned | Unassigned | 290_133 | Clustered/Singleton | 1 VC_290_133 | 1   | 0      | 1          | 0      | 0 | 0 | 0 | 1 Ref      |
| MK327937 | Unassigned | Unassigned | Unassigned | 290_16  | Clustered/Singleton | 1 VC_290_16  | 1   | 0      | 1          | 0      | 0 | 0 | 0 | 1 Ref      |
| MK327939 | Unassigned | Unassigned | Unassigned | 290_119 | Clustered/Singleton | 1 VC_290_119 | 1   | 0      | 1          | 0      | 0 | 0 | 0 | 1 Ref      |
| MK327940 | Unassigned | Unassigned | Unassigned | 290_121 | Clustered           | 2 VC_290_121 | 2   | 0.0026 | 0.90673408 | 0.0023 | 0 | 0 | 0 | 1 Ref      |
| MK327941 | Unassigned | Unassigned | Unassigned | 609_0   | Clustered           | 27 VC_609_0  | 27  | 0.9943 | 1          | 0.9943 | 0 | 0 | 0 | 1 Ref      |
| MK327942 | Unassigned | Unassigned | Unassigned | 290_156 | Clustered/Singleton | 1 VC_290_156 | 1   | 0      | 1          | 0      | 0 | 0 | 0 | 1 Ref      |
| MK327943 | Unassigned | Unassigned | Unassigned | 293_1   | Clustered           | 21 VC_293_1  | 21  | 0.1694 | 1          | 0.1694 | 0 | 0 | 0 | 0.9048 Ref |
| MK327944 | Unassigned | Unassigned | Unassigned | 290_134 | Clustered/Singleton | 1 VC_290_134 | 1   | 0      | 1          | 0      | 0 | 0 | 0 | 1 Ref      |
| MK327945 | Unassigned | Unassigned | Unassigned | 290_121 | Clustered           | 2 VC_290_121 | 2   | 0.0026 | 0.90673408 | 0.0023 | 0 | 0 | 0 | 1 Ref      |
| MK327946 | Unassigned | Unassigned | Unassigned | 290_17  | Clustered/Singleton | 1 VC_290_17  | 1   | 0      | 1          | 0      | 0 | 0 | 0 | 1 Ref      |
| MK327947 | Unassigned | Unassigned | Unassigned | 609_0   | Clustered           | 27 VC_609_0  | 27  | 0.9943 | 1          | 0.9943 | 0 | 0 | 0 | 1 Ref      |
| MK330684 | Unassigned | Unassigned | Unassigned | 907_0   | Clustered           | 32 VC_907_0  | 32  | 0.9964 | 1          | 0.9964 | 0 | 0 | 0 | 1 Ref      |
| MK331930 | Unassigned | Unassigned | Unassigned | 155_8   | Clustered           | 66 VC_155_8  | 66  | 0.4537 | 1          | 0.4537 | 0 | 0 | 0 | 0.8182 Ref |
| MK331931 | Unassigned | Unassigned | Unassigned | 155_8   | Clustered           | 66 VC_155_8  | 66  | 0.4537 | 1          | 0.4537 | 0 | 0 | 0 | 0.8182 Ref |
| MK335533 | Unassigned | Unassigned | Unassigned | 595_0   | Clustered           | 35 VC_595_0  | 35  | 0.8809 | 1          | 0.8809 | 0 | 0 | 0 | 1 Ref      |
| MK340760 | Unassigned | Unassigned | Unassigned | 80_9    | Clustered           | 2 VC_80_9    | 2   | 0.0061 | 0.94860001 | 0.0058 | 0 | 0 | 0 | 1 Ref      |
| MK340761 | Unassigned | Unassigned | Unassigned | 77_0    | Clustered           | 37 VC_77_0   | 37  | 0.9392 | 1          | 0.9392 | 0 | 0 | 0 | 1 Ref      |
| MK340941 | Unassigned | Unassigned | Unassigned | 249_0   | Clustered           | 2 VC_249_0   | 2   | 0.0834 | 0.95416588 | 0.0795 | 0 | 0 | 0 | 1 Ref      |
| MK348510 | Unassigned | Unassigned | Unassigned | 8_0     | Clustered           | 58 VC_8_0    | 58  | 0.8285 | 1          | 0.8285 | 0 | 0 | 0 | 0.9946 Ref |
| MK359299 | Unassigned | Unassigned | Unassigned | 335_23  | Clustered           | 17 VC_335_23 | 17  | 0.0714 | 1          | 0.0714 | 0 | 0 | 0 | 0.6397 Ref |
| MK359300 | Unassigned | Unassigned | Unassigned | 335_56  | Clustered           | 7 VC_335_56  | 7   | 0.0242 | 1          | 0.0242 | 0 | 0 | 0 | 0.9048 Ref |
| MK359301 | Unassigned | Unassigned | Unassigned | 535_1   | Clustered           | 108 VC_535_1 | 108 | 0.8479 | 1          | 0.8479 | 0 | 0 | 0 | 0.9955 Ref |
| MK359302 | Unassigned | Unassigned | Unassigned | 895_0   | Clustered           | 25 VC_895_0  | 25  | 0.5768 | 1          | 0.5768 | 0 | 0 | 0 | 1 Ref      |
| MK359303 | Unassigned | Unassigned | Unassigned | 579_14  | Clustered           | 8 VC_579_14  | 8   | 0.0227 | 0.99904117 | 0.0227 | 0 | 0 | 0 | 0.8214 Ref |
| MK359304 | Unassigned | Unassigned | Unassigned | 335_56  | Clustered           | 7 VC_335_56  | 7   | 0.0242 | 1          | 0.0242 | 0 | 0 | 0 | 0.9048 Ref |
| MK359305 | Unassigned | Unassigned | Unassigned | 579_62  | Clustered/Singleton | 1 VC_579_62  | 1   | 0      | 1          | 0      | 0 | 0 | 0 | 1 Ref      |
| MK359306 | Unassigned | Unassigned | Unassigned | 579_53  | Clustered/Singleton | 1 VC_579_53  | 1   | 0      | 1          | 0      | 0 | 0 | 0 | 1 Ref      |
| MK359307 | Unassigned | Unassigned | Unassigned | 538_92  | Clustered           | 5 VC_538_92  | 5   | 0.0653 | 0.99999997 | 0.0653 | 0 | 0 | 0 | 1 Ref      |
| MK359308 | Unassigned | Unassigned | Unassigned | 579_77  | Clustered           | 3 VC_579_77  | 3   | 0.0065 | 0.89175063 | 0.0058 | 0 | 0 | 0 | 0.6667 Ref |
| MK359309 | Unassigned | Unassigned | Unassigned | 571_7   | Clustered           | 28 VC_571_7  | 28  | 0.1651 | 1          | 0.1651 | 0 | 0 | 0 | 0.8519 Ref |
| MK359310 | Unassigned | Unassigned | Unassigned | 535_0   | Clustered           | 18 VC_535_0  | 18  | 0.1595 | 1          | 0.1595 | 0 | 0 | 0 | 1 Ref      |
| MK359311 | Unassigned | Unassigned | Unassigned | 579_14  | Clustered           | 8 VC_579_14  | 8   | 0.0227 | 0.99904117 | 0.0227 | 0 | 0 | 0 | 0.8214 Ref |
| MK359312 | Unassigned | Unassigned | Unassigned | 335_49  | Clustered           | 17 VC_335_49 | 17  | 0.0731 | 1          | 0.0731 | 0 | 0 | 0 | 0.7721 Ref |
| MK359313 | Unassigned | Unassigned | Unassigned | 1216_0  | Clustered           | 22 VC_1216_0 | 22  | 0.4546 | 1          | 0.4546 | 0 | 0 | 0 | 1 Ref      |
| MK359314 | Unassigned | Unassigned | Unassigned | 579_50  | Clustered           | 15 VC_579_50 | 15  | 0.0467 | 1          | 0.0467 | 0 | 0 | 0 | 0.9238 Ref |
| MK359315 | Unassigned | Unassigned | Unassigned | 538_80  | Clustered           | 3 VC_538_80  | 3   | 0.0291 | 0.99859904 | 0.0291 | 0 | 0 | 0 | 1 Ref      |
| MK359316 | Unassigned | Unassigned | Unassigned | 335_33  | Clustered           | 4 VC_335_33  | 4   | 0.0148 | 0.99998565 | 0.0148 | 0 | 0 | 0 | 1 Ref      |
| MK359317 | Unassigned | Unassigned | Unassigned | 579_59  | Clustered/Singleton | 1 VC_579_59  | 1   | 0      | 1          | 0      | 0 | 0 | 0 | 1 Ref      |
| MK359318 | Unassigned | Unassigned | Unassigned | 579_61  | Clustered           | 2 VC_579_61  | 2   | 0.0032 | 0.64519808 | 0.002  | 0 | 0 | 0 | 1 Ref      |
| MK359319 | Unassigned | Unassigned | Unassigned | 989_0   | Clustered           | 13 VC_989_0  | 13  | 0.8622 | 1          | 0.8622 | 0 | 0 | 0 | 1 Ref      |
| MK359320 | Unassigned | Unassigned | Unassigned | 571_0   | Clustered           | 16 VC_571_0  | 16  | 0.091  | 1          | 0.091  | 0 | 0 | 0 | 0.6667 Ref |
| MK359321 | Unassigned | Unassigned | Unassigned | 579_13  | Clustered/Singleton | 1 VC_579_13  | 1   | 0      | 1          | 0      | 0 | 0 | 0 | 1 Ref      |
| MK359322 | Unassigned | Unassigned | Unassigned | 535_0   | Clustered           | 18 VC_535_0  | 18  | 0.1595 | 1          | 0.1595 | 0 | 0 | 0 | 1 Ref      |
| MK359323 | Unassigned | Unassigned | Unassigned | 535_1   | Clustered           | 108 VC_535_1 | 108 | 0.8479 | 1          | 0.8479 | 0 | 0 | 0 | 0.9955 Ref |
| MK359324 | Unassigned | Unassigned | Unassigned | 579_9   | Clustered           | 3 VC_579_9   | 3   | 0.0064 | 0.81181703 | 0.0052 | 0 | 0 | 0 | 0.6667 Ref |
| MK359325 | Unassigned | Unassigned | Unassigned | 535_1   | Clustered           | 108 VC_535_1 | 108 | 0.8479 | 1          | 0.8479 | 0 | 0 | 0 | 0.9955 Ref |
| MK359326 | Unassigned | Unassigned | Unassigned | 579_20  | Clustered           | 17 VC_579_20 | 17  | 0.0538 | 1          | 0.0538 | 0 | 0 | 0 | 0.9926 Ref |
| MK359327 | Unassigned | Unassigned | Unassigned | 579_45  | Clustered/Singleton | 1 VC_579_45  | 1   | 0      | 1          | 0      | 0 | 0 | 0 | 1 Ref      |
| MK359328 | Unassigned | Unassigned | Unassigned | 579_17  | Clustered/Singleton | 1 VC_579_17  | 1   | 0      | 1          | 0      | 0 | 0 | 0 | 1 Ref      |
| MK359329 | Unassigned | Unassigned | Unassigned | 579_69  | Clustered/Singleton | 1 VC_579_69  | 1   | 0      | 1          | 0      | 0 | 0 | 0 | 1 Ref      |
| MK359330 | Unassigned | Unassigned | Unassigned | 579_66  | Clustered/Singleton | 1 VC_579_66  | 1   | 0      | 1          | 0      | 0 | 0 | 0 | 1 Ref      |
| MK359331 | Unassigned | Unassigned | Unassigned | 335_10  | Clustered           | 3 VC_335_10  | 3   | 0.012  | 0.99859169 | 0.012  | 0 | 0 | 0 | 1 Ref      |
| MK359332 | Unassigned | Unassigned | Unassigned | 1114_0  | Clustered           | 20 VC_1114_0 | 20  | 0.3238 | 1          | 0.3238 | 0 | 0 | 0 | 0.9842 Ref |
| MK359333 | Unassigned | Unassigned | Unassigned | 579_28  | Clustered/Singleton | 1 VC_579_28  | 1   | 0      | 1          | 0      | 0 | 0 | 0 | 1 Ref      |
| MK359334 | Unassigned | Unassigned | Unassigned | 579_49  | Clustered           | 7 VC_579_49  | 7   | 0.0194 | 0.98914431 | 0.0191 | 0 | 0 | 0 | 0.8571 Ref |
| MK359335 | Unassigned | Unassigned | Unassigned | 579_20  | Clustered           | 17 VC_579_20 | 17  | 0.0538 | 1          | 0.0538 | 0 | 0 | 0 | 0.9926 Ref |
| MK359336 | Unassigned | Unassigned | Unassigned | 579_36  | Clustered           | 4 VC_579_36  | 4   | 0.0096 | 0.84559358 | 0.0081 | 0 | 0 | 0 | 1 Ref      |
| MK359337 | Unassigned | Unassigned | Unassigned | 579_43  | Clustered/Singleton | 1 VC_579_43  | 1   | 0      | 1          | 0      | 0 | 0 | 0 | 1 Ref      |
| MK359338 | Unassigned | Unassigned | Unassigned | 579_20  | Clustered           | 17 VC_579_20 | 17  | 0.0538 | 1          | 0.0538 | 0 | 0 | 0 | 0.9926 Ref |
| MK359339 | Unassigned | Unassigned | Unassigned | 579_20  | Clustered           | 17 VC_579_20 | 17  | 0.0538 | 1          | 0.0538 | 0 | 0 | 0 | 0.9926 Ref |
| MK359340 | Unassigned | Unassigned | Unassigned | 535_1   | Clustered           | 108 VC_535_1 | 108 | 0.8479 | 1          | 0.8479 | 0 | 0 | 0 | 0.9955 Ref |
| MK359341 | Unassigned | Unassigned | Unassigned | 532_0   | Clustered           | 75 VC_532_0  | 75  | 0.9393 | 1          | 0.9393 | 0 | 0 | 0 | 1 Ref      |
| MK359342 | Unassigned | Unassigned | Unassigned | 579_15  | Clustered/Singleton | 1 VC_579_15  | 1   | 0      | 1          | 0      | 0 | 0 | 0 | 1 Ref      |
| MK359343 | Unassigned | Unassigned | Unassigned | 538_57  | Clustered/Singleton | 1 VC_538_57  | 1   | 0      | 1          | 0      | 0 | 0 | 0 | 1 Ref      |
| MK359344 | Unassigned | Unassigned | Unassigned | 579_30  | Clustered           | 3 VC_579_30  | 3   | 0.0064 | 0.74796372 | 0.0048 | 0 | 0 | 0 | 1 Ref      |
| MK359345 | Unassigned | Unassigned | Unassigned | 579_44  | Clustered/Singleton | 1 VC_579_44  | 1   | 0      | 1          | 0      | 0 | 0 | 0 | 1 Ref      |
| MK359346 | Unassigned | Unassigned | Unassigned | 579_71  | Clustered/Singleton | 1 VC_579_71  | 1   | 0      | 1          | 0      | 0 | 0 | 0 | 1 Ref      |
| MK359347 | Unassigned | Unassigned | Unassigned | 579_20  | Clustered           | 17 VC_579_20 | 17  | 0.0538 | 1          | 0.0538 | 0 | 0 | 0 | 0.9926 Ref |
| MK359348 | Unassigned | Unassigned | Unassigned | 579_12  | Clustered           | 3 VC_579_12  | 3   | 0.0064 | 0.86841267 | 0.0056 | 0 | 0 | 0 | 1 Ref      |
| MK359349 | Unassigned | Unassigned | Unassigned | 579_46  | Clustered/Singleton | 1 VC_579_46  | 1   | 0      | 1          | 0      | 0 | 0 | 0 | 1 Ref      |
| MK359350 | Unassigned | Unassigned | Unassigned | 579_64  | Clustered/Singleton | 1 VC_579_64  | 1   | 0      | 1          | 0      | 0 | 0 | 0 | 1 Ref      |
| MK359351 | Unassigned | Unassigned | Unassigned | 1114_0  | Clustered           | 20 VC_1114_0 | 20  | 0.3238 | 1          | 0.3238 | 0 | 0 | 0 | 0.9842 Ref |
| MK359352 | Unassigned | Unassigned | Unassigned | 230_0   | Clustered           | 38 VC_230_0  | 38  | 0.9076 | 1          | 0.9076 | 0 | 0 | 0 | 1 Ref      |
| MK359353 | Unassigned | Unassigned | Unassigned | 579_4   | Clustered/Singleton | 1 VC_579_4   | 1   | 0      | 1          | 0      | 0 | 0 | 0 | 1 Ref      |
| MK359354 | Unassigned | Unassigned | Unassigned | 335_5   | Clustered           | 11 VC_335_5  | 11  | 0.0469 | 1          | 0.0469 | 0 | 0 | 0 | 0.7636 Ref |
| MK359355 | Unassigned | Unassigned | Unassigned | 579_3   | Clustered/Singleton | 1 VC_579_3   | 1   | 0      | 1          | 0      | 0 | 0 | 0 | 1 Ref      |
| MK359356 | Unassigned | Unassigned | Unassigned | 535_1   | Clustered           | 108 VC_535_1 | 108 | 0.8479 | 1          | 0.8479 | 0 | 0 | 0 | 0.9955 Ref |
| MK359357 | Unassigned | Unassigned | Unassigned | 527_0   | Clustered           | 37 VC_527_0  | 37  | 0.9679 | 1          | 0.9679 | 0 | 0 | 0 | 1 Ref      |
| MK359358 | Unassigned | Unassigned | Unassigned | 579_14  | Clustered           | 8 VC_579_14  | 8   | 0.0227 | 0.99904117 | 0.0227 | 0 | 0 | 0 | 0.8214 Ref |
| MK359359 | Unassigned | Unassigned | Unassigned | 579_73  | Clustered           | 2 VC_579_73  | 2   | 0.0033 | 0.82635115 | 0.0027 | 0 | 0 | 0 | 1 Ref      |
| MK359360 | Unassigned | Unassigned | Unassigned | 230_0   | Clustered           | 38 VC_230_0  | 38  | 0.9076 | 1          | 0.9076 | 0 | 0 | 0 | 1 Ref      |



|          |            |            |            |         |                     |              |     |        |            |        |   |   |   |            |
|----------|------------|------------|------------|---------|---------------------|--------------|-----|--------|------------|--------|---|---|---|------------|
| MK359361 | Unassigned | Unassigned | Unassigned | 579_27  | Clustered           | 2 VC_579_27  | 2   | 0.0032 | 0.63743142 | 0.002  | 0 | 0 | 0 | 1 Ref      |
| MK359362 | Unassigned | Unassigned | Unassigned | 579_20  | Clustered           | 17 VC_579_20 | 17  | 0.0538 | 1          | 0.0538 | 0 | 0 | 0 | 0.9926 Ref |
| MK359363 | Unassigned | Unassigned | Unassigned | 579_36  | Clustered           | 4 VC_579_36  | 4   | 0.0096 | 0.84559358 | 0.0081 | 0 | 0 | 0 | 1 Ref      |
| MK359364 | Unassigned | Unassigned | Unassigned | 579_39  | Clustered           | 3 VC_579_39  | 3   | 0.0063 | 0.72858376 | 0.0046 | 0 | 0 | 0 | 0.6667 Ref |
| MK359365 | Unassigned | Unassigned | Unassigned | 579_50  | Clustered           | 15 VC_579_50 | 15  | 0.0467 | 1          | 0.0467 | 0 | 0 | 0 | 0.9238 Ref |
| MK359366 | Unassigned | Unassigned | Unassigned | 579_36  | Clustered           | 4 VC_579_36  | 4   | 0.0096 | 0.84559358 | 0.0081 | 0 | 0 | 0 | 1 Ref      |
| MK359990 | Unassigned | Unassigned | Unassigned | 647_0   | Clustered           | 37 VC_647_0  | 37  | 0.5847 | 1          | 0.5847 | 0 | 0 | 0 | 0.9234 Ref |
| MK360024 | Unassigned | Unassigned | Unassigned | 711_0   | Clustered           | 48 VC_711_0  | 48  | 0.8217 | 1          | 0.8217 | 0 | 0 | 0 | 1 Ref      |
| MK360025 | Unassigned | Unassigned | Unassigned | 1004_0  | Clustered           | 4 VC_1004_0  | 4   | 0.2949 | 0.99997642 | 0.2949 | 0 | 0 | 0 | 1 Ref      |
| MK370036 | Unassigned | Unassigned | Unassigned | 199_1   | Clustered/Singleton | 1 VC_199_1   | 1   | 0      | 1          | 0      | 0 | 0 | 0 | 1 Ref      |
| MK372342 | Unassigned | Unassigned | Unassigned | 470_0   | Clustered           | 62 VC_470_0  | 62  | 0.902  | 1          | 0.902  | 0 | 0 | 0 | 1 Ref      |
| MK373770 | Unassigned | Unassigned | Unassigned | 837_1   | Clustered           | 24 VC_837_1  | 24  | 0.5328 | 1          | 0.5328 | 0 | 0 | 0 | 1 Ref      |
| MK373771 | Unassigned | Unassigned | Unassigned | 466_0   | Clustered           | 66 VC_466_0  | 66  | 0.9246 | 1          | 0.9246 | 0 | 0 | 0 | 1 Ref      |
| MK373772 | Unassigned | Unassigned | Unassigned | 1281_0  | Clustered           | 2 VC_1281_0  | 2   | 0.9858 | 0.81445332 | 0.8029 | 0 | 0 | 0 | 1 Ref      |
| MK373773 | Unassigned | Unassigned | Unassigned | 466_0   | Clustered           | 66 VC_466_0  | 66  | 0.9246 | 1          | 0.9246 | 0 | 0 | 0 | 1 Ref      |
| MK373774 | Unassigned | Unassigned | Unassigned | 293_3   | Clustered           | 2 VC_293_3   | 2   | 0.0073 | 0.74885804 | 0.0055 | 0 | 0 | 0 | 1 Ref      |
| MK373775 | Unassigned | Unassigned | Unassigned | 293_3   | Clustered           | 2 VC_293_3   | 2   | 0.0073 | 0.74885804 | 0.0055 | 0 | 0 | 0 | 1 Ref      |
| MK373776 | Unassigned | Unassigned | Unassigned | 636_0   | Clustered           | 13 VC_636_0  | 13  | 0.6223 | 1          | 0.6223 | 0 | 0 | 0 | 1 Ref      |
| MK373777 | Unassigned | Unassigned | Unassigned | 636_0   | Clustered           | 13 VC_636_0  | 13  | 0.6223 | 1          | 0.6223 | 0 | 0 | 0 | 1 Ref      |
| MK373778 | Unassigned | Unassigned | Unassigned | 293_1   | Clustered           | 21 VC_293_1  | 21  | 0.1694 | 1          | 0.1694 | 0 | 0 | 0 | 0.9048 Ref |
| MK373779 | Unassigned | Unassigned | Unassigned | 290_124 | Clustered/Singleton | 1 VC_290_124 | 1   | 0      | 1          | 0      | 0 | 0 | 0 | 1 Ref      |
| MK373780 | Unassigned | Unassigned | Unassigned | 794_19  | Clustered           | 16 VC_794_19 | 16  | 0.0975 | 0.99616626 | 0.0971 | 0 | 0 | 0 | 0.8083 Ref |
| MK373781 | Unassigned | Unassigned | Unassigned | 290_53  | Clustered/Singleton | 1 VC_290_53  | 1   | 0      | 1          | 0      | 0 | 0 | 0 | 1 Ref      |
| MK373782 | Unassigned | Unassigned | Unassigned | 293_1   | Clustered           | 21 VC_293_1  | 21  | 0.1694 | 1          | 0.1694 | 0 | 0 | 0 | 0.9048 Ref |
| MK373783 | Unassigned | Unassigned | Unassigned | 134_2   | Clustered           | 17 VC_134_2  | 17  | 0.1715 | 1          | 0.1715 | 0 | 0 | 0 | 0.9853 Ref |
| MK373784 | Unassigned | Unassigned | Unassigned | 293_1   | Clustered           | 21 VC_293_1  | 21  | 0.1694 | 1          | 0.1694 | 0 | 0 | 0 | 0.9048 Ref |
| MK373785 | Unassigned | Unassigned | Unassigned | 290_12  | Clustered/Singleton | 1 VC_290_12  | 1   | 0      | 1          | 0      | 0 | 0 | 0 | 1 Ref      |
| MK373786 | Unassigned | Unassigned | Unassigned | 290_43  | Clustered/Singleton | 1 VC_290_43  | 1   | 0      | 1          | 0      | 0 | 0 | 0 | 1 Ref      |
| MK373787 | Unassigned | Unassigned | Unassigned | 290_76  | Clustered/Singleton | 1 VC_290_76  | 1   | 0      | 1          | 0      | 0 | 0 | 0 | 1 Ref      |
| MK373788 | Unassigned | Unassigned | Unassigned | 871_1   | Clustered           | 26 VC_871_1  | 26  | 0.6303 | 1          | 0.6303 | 0 | 0 | 0 | 0.9815 Ref |
| MK373789 | Unassigned | Unassigned | Unassigned | 859_0   | Clustered           | 67 VC_859_0  | 67  | 0.9622 | 1          | 0.9622 | 0 | 0 | 0 | 1 Ref      |
| MK373790 | Unassigned | Unassigned | Unassigned | 859_0   | Clustered           | 67 VC_859_0  | 67  | 0.9622 | 1          | 0.9622 | 0 | 0 | 0 | 1 Ref      |
| MK373791 | Unassigned | Unassigned | Unassigned | 859_0   | Clustered           | 67 VC_859_0  | 67  | 0.9622 | 1          | 0.9622 | 0 | 0 | 0 | 1 Ref      |
| MK373792 | Unassigned | Unassigned | Unassigned | 198_1   | Clustered/Singleton | 1 VC_198_1   | 1   | 0      | 1          | 0      | 0 | 0 | 0 | 1 Ref      |
| MK373793 | Unassigned | Unassigned | Unassigned | 470_0   | Clustered           | 62 VC_470_0  | 62  | 0.902  | 1          | 0.902  | 0 | 0 | 0 | 1 Ref      |
| MK373794 | Unassigned | Unassigned | Unassigned | 737_0   | Clustered           | 13 VC_737_0  | 13  | 0.5083 | 1          | 0.5083 | 0 | 0 | 0 | 1 Ref      |
| MK373795 | Unassigned | Unassigned | Unassigned | 737_0   | Clustered           | 13 VC_737_0  | 13  | 0.5083 | 1          | 0.5083 | 0 | 0 | 0 | 1 Ref      |
| MK373796 | Unassigned | Unassigned | Unassigned | 198_9   | Clustered/Singleton | 1 VC_198_9   | 1   | 0      | 1          | 0      | 0 | 0 | 0 | 1 Ref      |
| MK373797 | Unassigned | Unassigned | Unassigned | 198_2   | Clustered           | 2 VC_198_2   | 2   | 0.0072 | 0.95491601 | 0.0069 | 0 | 0 | 0 | 1 Ref      |
| MK373798 | Unassigned | Unassigned | Unassigned | 975_0   | Clustered           | 40 VC_975_0  | 40  | 0.6888 | 1          | 0.6888 | 0 | 0 | 0 | 1 Ref      |
| MK373799 | Unassigned | Unassigned | Unassigned | 198_2   | Clustered           | 2 VC_198_2   | 2   | 0.0072 | 0.95491601 | 0.0069 | 0 | 0 | 0 | 1 Ref      |
| MK376953 | Unassigned | Unassigned | Unassigned | 898_1   | Clustered           | 27 VC_898_1  | 27  | 0.8894 | 1          | 0.8894 | 0 | 0 | 0 | 1 Ref      |
| MK376954 | Unassigned | Unassigned | Unassigned | 789_0   | Clustered           | 34 VC_789_0  | 34  | 0.9167 | 1          | 0.9167 | 0 | 0 | 0 | 1 Ref      |
| MK376955 | Unassigned | Unassigned | Unassigned | 244_3   | Clustered           | 8 VC_244_3   | 8   | 0.1086 | 1          | 0.1086 | 0 | 0 | 0 | 1 Ref      |
| MK376956 | Unassigned | Unassigned | Unassigned | 1223_1  | Clustered           | 10 VC_1223_1 | 10  | 0.5795 | 1          | 0.5795 | 0 | 0 | 0 | 1 Ref      |
| MK376957 | Unassigned | Unassigned | Unassigned | 898_1   | Clustered           | 27 VC_898_1  | 27  | 0.8894 | 1          | 0.8894 | 0 | 0 | 0 | 1 Ref      |
| MK376958 | Unassigned | Unassigned | Unassigned | 989_0   | Clustered           | 13 VC_989_0  | 13  | 0.8622 | 1          | 0.8622 | 0 | 0 | 0 | 1 Ref      |
| MK376959 | Unassigned | Unassigned | Unassigned | 1223_1  | Clustered           | 10 VC_1223_1 | 10  | 0.5795 | 1          | 0.5795 | 0 | 0 | 0 | 1 Ref      |
| MK376960 | Unassigned | Unassigned | Unassigned | 789_0   | Clustered           | 34 VC_789_0  | 34  | 0.9167 | 1          | 0.9167 | 0 | 0 | 0 | 1 Ref      |
| MK376961 | Unassigned | Unassigned | Unassigned | 578_1   | Clustered           | 11 VC_578_1  | 11  | 0.4919 | 1          | 0.4919 | 0 | 0 | 0 | 0.7818 Ref |
| MK376962 | Unassigned | Unassigned | Unassigned | 789_0   | Clustered           | 34 VC_789_0  | 34  | 0.9167 | 1          | 0.9167 | 0 | 0 | 0 | 1 Ref      |
| MK376963 | Unassigned | Unassigned | Unassigned | 881_1   | Clustered           | 13 VC_881_1  | 13  | 0.5859 | 1          | 0.5859 | 0 | 0 | 0 | 1 Ref      |
| MK380014 | Unassigned | Unassigned | Unassigned | 466_0   | Clustered           | 66 VC_466_0  | 66  | 0.9246 | 1          | 0.9246 | 0 | 0 | 0 | 1 Ref      |
| MK380015 | Unassigned | Unassigned | Unassigned | 848_0   | Clustered           | 124 VC_848_0 | 124 | 0.9484 | 1          | 0.9484 | 0 | 0 | 0 | 1 Ref      |
| MK380016 | Unassigned | Unassigned | Unassigned | 848_0   | Clustered           | 124 VC_848_0 | 124 | 0.9484 | 1          | 0.9484 | 0 | 0 | 0 | 1 Ref      |
| MK387309 | Unassigned | Unassigned | Unassigned | 663_0   | Clustered           | 5 VC_663_0   | 5   | 0.6645 | 0.99999974 | 0.6645 | 0 | 0 | 0 | 1 Ref      |
| MK387337 | Unassigned | Unassigned | Unassigned | 869_0   | Clustered           | 3 VC_869_0   | 3   | 0.3287 | 0.99831497 | 0.3281 | 0 | 0 | 0 | 1 Ref      |
| MK387869 | Unassigned | Unassigned | Unassigned | 114_0   | Clustered           | 8 VC_114_0   | 8   | 0.2518 | 1          | 0.2518 | 0 | 0 | 0 | 1 Ref      |
| MK388689 | Unassigned | Unassigned | Unassigned | 870_0   | Clustered           | 2 VC_870_0   | 2   | 0.5991 | 0.92357512 | 0.5533 | 0 | 0 | 0 | 1 Ref      |
| MK392363 | Unassigned | Unassigned | Unassigned | 1015_1  | Clustered           | 26 VC_1015_1 | 26  | 0.6989 | 1          | 0.6989 | 0 | 0 | 0 | 1 Ref      |
| MK392364 | Unassigned | Unassigned | Unassigned | 1015_1  | Clustered           | 26 VC_1015_1 | 26  | 0.6989 | 1          | 0.6989 | 0 | 0 | 0 | 1 Ref      |
| MK392365 | Unassigned | Unassigned | Unassigned | 1015_1  | Clustered           | 26 VC_1015_1 | 26  | 0.6989 | 1          | 0.6989 | 0 | 0 | 0 | 1 Ref      |
| MK392366 | Unassigned | Unassigned | Unassigned | 1015_1  | Clustered           | 26 VC_1015_1 | 26  | 0.6989 | 1          | 0.6989 | 0 | 0 | 0 | 1 Ref      |
| MK392367 | Unassigned | Unassigned | Unassigned | 539_0   | Clustered           | 37 VC_539_0  | 37  | 0.911  | 1          | 0.911  | 0 | 0 | 0 | 1 Ref      |
| MK392368 | Unassigned | Unassigned | Unassigned | 1076_0  | Clustered           | 6 VC_1076_0  | 6   | 0.6773 | 1          | 0.6773 | 0 | 0 | 0 | 1 Ref      |
| MK393882 | Unassigned | Unassigned | Unassigned | 199_16  | Clustered           | 12 VC_199_16 | 12  | 0.064  | 1          | 0.064  | 0 | 0 | 0 | 0.9394 Ref |
| MK408758 | Unassigned | Unassigned | Unassigned | 867_0   | Clustered           | 5 VC_867_0   | 5   | 0.2806 | 0.99999994 | 0.2806 | 0 | 0 | 0 | 1 Ref      |
| MK411746 | Unassigned | Unassigned | Unassigned | 1426_0  | Clustered           | 2 VC_1426_0  | 2   | 0.8068 | 0.92263554 | 0.7444 | 0 | 0 | 0 | 1 Ref      |
| MK416007 | Unassigned | Unassigned | Unassigned | 249_1   | Clustered           | 21 VC_249_1  | 21  | 0.6775 | 1          | 0.6775 | 0 | 0 | 0 | 0.8476 Ref |
| MK416009 | Unassigned | Unassigned | Unassigned | 6_0     | Clustered           | 44 VC_6_0    | 44  | 0.9068 | 1          | 0.9068 | 0 | 0 | 0 | 1 Ref      |
| MK416010 | Unassigned | Unassigned | Unassigned | 492_0   | Clustered           | 20 VC_492_0  | 20  | 0.7887 | 1          | 0.7887 | 0 | 0 | 0 | 1 Ref      |
| MK416011 | Unassigned | Unassigned | Unassigned | 6_0     | Clustered           | 44 VC_6_0    | 44  | 0.9068 | 1          | 0.9068 | 0 | 0 | 0 | 1 Ref      |
| MK416012 | Unassigned | Unassigned | Unassigned | 6_0     | Clustered           | 44 VC_6_0    | 44  | 0.9068 | 1          | 0.9068 | 0 | 0 | 0 | 1 Ref      |
| MK416013 | Unassigned | Unassigned | Unassigned | 38_0    | Clustered           | 4 VC_38_0    | 4   | 0.1746 | 0.99998341 | 0.1746 | 0 | 0 | 0 | 1 Ref      |
| MK416014 | Unassigned | Unassigned | Unassigned | 251_0   | Clustered           | 2 VC_251_0   | 2   | 0.0633 | 0.95608273 | 0.0605 | 0 | 0 | 0 | 1 Ref      |
| MK416015 | Unassigned | Unassigned | Unassigned | 236_0   | Clustered           | 32 VC_236_0  | 32  | 0.9115 | 1          | 0.9115 | 0 | 0 | 0 | 1 Ref      |
| MK416017 | Unassigned | Unassigned | Unassigned | 252_0   | Clustered           | 12 VC_252_0  | 12  | 0.4075 | 1          | 0.4075 | 0 | 0 | 0 | 1 Ref      |
| MK416018 | Unassigned | Unassigned | Unassigned | 235_0   | Clustered           | 60 VC_235_0  | 60  | 0.9413 | 1          | 0.9413 | 0 | 0 | 0 | 1 Ref      |
| MK416019 | Unassigned | Unassigned | Unassigned | 249_1   | Clustered           | 21 VC_249_1  | 21  | 0.6775 | 1          | 0.6775 | 0 | 0 | 0 | 0.8476 Ref |
| MK416020 | Unassigned | Unassigned | Unassigned | 6_0     | Clustered           | 44 VC_6_0    | 44  | 0.9068 | 1          | 0.9068 | 0 | 0 | 0 | 1 Ref      |
| MK416022 | Unassigned | Unassigned | Unassigned | 38_0    | Clustered           | 4 VC_38_0    | 4   | 0.1746 | 0.99998341 | 0.1746 | 0 | 0 | 0 | 1 Ref      |



|          |            |            |            |        |                     |              |    |        |            |        |   |   |   |        |     |
|----------|------------|------------|------------|--------|---------------------|--------------|----|--------|------------|--------|---|---|---|--------|-----|
| MK417514 | Unassigned | Unassigned | Unassigned | 155_8  | Clustered           | 66 VC_155_8  | 66 | 0.4537 | 1          | 0.4537 | 0 | 0 | 0 | 0.8182 | Ref |
| MK417515 | Unassigned | Unassigned | Unassigned | 155_8  | Clustered           | 66 VC_155_8  | 66 | 0.4537 | 1          | 0.4537 | 0 | 0 | 0 | 0.8182 | Ref |
| MK417516 | Unassigned | Unassigned | Unassigned | 155_8  | Clustered           | 66 VC_155_8  | 66 | 0.4537 | 1          | 0.4537 | 0 | 0 | 0 | 0.8182 | Ref |
| MK421971 | Unassigned | Unassigned | Unassigned | 509_0  | Clustered           | 36 VC_509_0  | 36 | 0.5291 | 1          | 0.5291 | 0 | 0 | 0 | 0.9714 | Ref |
| MK422448 | Unassigned | Unassigned | Unassigned | 492_0  | Clustered           | 20 VC_492_0  | 20 | 0.7887 | 1          | 0.7887 | 0 | 0 | 0 | 1      | Ref |
| MK422449 | Unassigned | Unassigned | Unassigned | 6_0    | Clustered           | 44 VC_6_0    | 44 | 0.9068 | 1          | 0.9068 | 0 | 0 | 0 | 1      | Ref |
| MK422451 | Unassigned | Unassigned | Unassigned | 738_0  | Clustered           | 9 VC_738_0   | 9  | 0.7116 | 1          | 0.7116 | 0 | 0 | 0 | 1      | Ref |
| MK422453 | Unassigned | Unassigned | Unassigned | 6_0    | Clustered           | 44 VC_6_0    | 44 | 0.9068 | 1          | 0.9068 | 0 | 0 | 0 | 1      | Ref |
| MK422454 | Unassigned | Unassigned | Unassigned | 6_0    | Clustered           | 44 VC_6_0    | 44 | 0.9068 | 1          | 0.9068 | 0 | 0 | 0 | 1      | Ref |
| MK422455 | Unassigned | Unassigned | Unassigned | 249_1  | Clustered           | 21 VC_249_1  | 21 | 0.6775 | 1          | 0.6775 | 0 | 0 | 0 | 0.8476 | Ref |
| MK424903 | Unassigned | Unassigned | Unassigned | 284_0  | Clustered           | 3 VC_284_0   | 3  | 1      | 1          | 1      | 0 | 0 | 0 | 1      | Ref |
| MK433259 | Unassigned | Unassigned | Unassigned | 901_0  | Clustered           | 31 VC_901_0  | 31 | 0.8235 | 1          | 0.8235 | 0 | 0 | 0 | 0.8194 | Ref |
| MK433260 | Unassigned | Unassigned | Unassigned | 901_0  | Clustered           | 31 VC_901_0  | 31 | 0.8235 | 1          | 0.8235 | 0 | 0 | 0 | 0.8194 | Ref |
| MK433261 | Unassigned | Unassigned | Unassigned | 895_0  | Clustered           | 25 VC_895_0  | 25 | 0.5768 | 1          | 0.5768 | 0 | 0 | 0 | 1      | Ref |
| MK433262 | Unassigned | Unassigned | Unassigned | 571_8  | Clustered           | 19 VC_571_8  | 19 | 0.1031 | 1          | 0.1031 | 0 | 0 | 0 | 0.8713 | Ref |
| MK433263 | Unassigned | Unassigned | Unassigned | 895_0  | Clustered           | 25 VC_895_0  | 25 | 0.5768 | 1          | 0.5768 | 0 | 0 | 0 | 1      | Ref |
| MK433265 | Unassigned | Unassigned | Unassigned | 895_0  | Clustered           | 25 VC_895_0  | 25 | 0.5768 | 1          | 0.5768 | 0 | 0 | 0 | 1      | Ref |
| MK433266 | Unassigned | Unassigned | Unassigned | 386_0  | Clustered           | 10 VC_386_0  | 10 | 0.7454 | 1          | 0.7454 | 0 | 0 | 0 | 1      | Ref |
| MK433267 | Unassigned | Unassigned | Unassigned | 895_0  | Clustered           | 25 VC_895_0  | 25 | 0.5768 | 1          | 0.5768 | 0 | 0 | 0 | 1      | Ref |
| MK433268 | Unassigned | Unassigned | Unassigned | 901_0  | Clustered           | 31 VC_901_0  | 31 | 0.8235 | 1          | 0.8235 | 0 | 0 | 0 | 0.8194 | Ref |
| MK433269 | Unassigned | Unassigned | Unassigned | 901_0  | Clustered           | 31 VC_901_0  | 31 | 0.8235 | 1          | 0.8235 | 0 | 0 | 0 | 0.8194 | Ref |
| MK433270 | Unassigned | Unassigned | Unassigned | 1016_0 | Clustered           | 62 VC_1016_0 | 62 | 0.8638 | 1          | 0.8638 | 0 | 0 | 0 | 0.743  | Ref |
| MK433271 | Unassigned | Unassigned | Unassigned | 1016_0 | Clustered           | 62 VC_1016_0 | 62 | 0.8638 | 1          | 0.8638 | 0 | 0 | 0 | 0.743  | Ref |
| MK433272 | Unassigned | Unassigned | Unassigned | 789_0  | Clustered           | 34 VC_789_0  | 34 | 0.9167 | 1          | 0.9167 | 0 | 0 | 0 | 1      | Ref |
| MK433273 | Unassigned | Unassigned | Unassigned | 532_0  | Clustered           | 75 VC_532_0  | 75 | 0.9393 | 1          | 0.9393 | 0 | 0 | 0 | 1      | Ref |
| MK433274 | Unassigned | Unassigned | Unassigned | 701_0  | Clustered           | 16 VC_701_0  | 16 | 0.2957 | 1          | 0.2957 | 0 | 0 | 0 | 0.9167 | Ref |
| MK433275 | Unassigned | Unassigned | Unassigned | 701_0  | Clustered           | 16 VC_701_0  | 16 | 0.2957 | 1          | 0.2957 | 0 | 0 | 0 | 0.9167 | Ref |
| MK433276 | Unassigned | Unassigned | Unassigned | 1016_0 | Clustered           | 62 VC_1016_0 | 62 | 0.8638 | 1          | 0.8638 | 0 | 0 | 0 | 0.743  | Ref |
| MK433277 | Unassigned | Unassigned | Unassigned | 783_0  | Clustered           | 67 VC_783_0  | 67 | 0.8945 | 1          | 0.8945 | 0 | 0 | 0 | 1      | Ref |
| MK433278 | Unassigned | Unassigned | Unassigned | 1016_0 | Clustered           | 62 VC_1016_0 | 62 | 0.8638 | 1          | 0.8638 | 0 | 0 | 0 | 0.743  | Ref |
| MK433279 | Unassigned | Unassigned | Unassigned | 783_0  | Clustered           | 67 VC_783_0  | 67 | 0.8945 | 1          | 0.8945 | 0 | 0 | 0 | 1      | Ref |
| MK433577 | Unassigned | Unassigned | Unassigned | 6_0    | Clustered           | 44 VC_6_0    | 44 | 0.9068 | 1          | 0.9068 | 0 | 0 | 0 | 1      | Ref |
| MK433578 | Unassigned | Unassigned | Unassigned | 6_0    | Clustered           | 44 VC_6_0    | 44 | 0.9068 | 1          | 0.9068 | 0 | 0 | 0 | 1      | Ref |
| MK433579 | Unassigned | Unassigned | Unassigned | 249_1  | Clustered           | 21 VC_249_1  | 21 | 0.6775 | 1          | 0.6775 | 0 | 0 | 0 | 0.8476 | Ref |
| MK433580 | Unassigned | Unassigned | Unassigned | 6_0    | Clustered           | 44 VC_6_0    | 44 | 0.9068 | 1          | 0.9068 | 0 | 0 | 0 | 1      | Ref |
| MK433581 | Unassigned | Unassigned | Unassigned | 6_0    | Clustered           | 44 VC_6_0    | 44 | 0.9068 | 1          | 0.9068 | 0 | 0 | 0 | 1      | Ref |
| MK433582 | Unassigned | Unassigned | Unassigned | 6_0    | Clustered           | 44 VC_6_0    | 44 | 0.9068 | 1          | 0.9068 | 0 | 0 | 0 | 1      | Ref |
| MK443264 | Unassigned | Unassigned | Unassigned | 77_0   | Clustered           | 37 VC_77_0   | 37 | 0.9392 | 1          | 0.9392 | 0 | 0 | 0 | 1      | Ref |
| MK443265 | Unassigned | Unassigned | Unassigned | 77_1   | Clustered/Singleton | 1 VC_77_1    | 1  | 0      | 0          | 0      | 0 | 1 | 0 | 1      | Ref |
| MK443266 | Unassigned | Unassigned | Unassigned | 173_0  | Clustered           | 3 VC_173_0   | 3  | 0.6871 | 0.99826575 | 0.6859 | 0 | 0 | 0 | 1      | Ref |
| MK448230 | Unassigned | Unassigned | Unassigned | 249_1  | Clustered           | 21 VC_249_1  | 21 | 0.6775 | 1          | 0.6775 | 0 | 0 | 0 | 0.8476 | Ref |
| MK448231 | Unassigned | Unassigned | Unassigned | 33_0   | Clustered           | 9 VC_33_0    | 9  | 0.3409 | 1          | 0.3409 | 0 | 0 | 0 | 0.6944 | Ref |
| MK448233 | Unassigned | Unassigned | Unassigned | 33_0   | Clustered           | 9 VC_33_0    | 9  | 0.3409 | 1          | 0.3409 | 0 | 0 | 0 | 0.6944 | Ref |
| MK448234 | Unassigned | Unassigned | Unassigned | 38_0   | Clustered           | 4 VC_38_0    | 4  | 0.1746 | 0.99998341 | 0.1746 | 0 | 0 | 0 | 1      | Ref |
| MK448235 | Unassigned | Unassigned | Unassigned | 33_0   | Clustered           | 9 VC_33_0    | 9  | 0.3409 | 1          | 0.3409 | 0 | 0 | 0 | 0.6944 | Ref |
| MK448237 | Unassigned | Unassigned | Unassigned | 38_0   | Clustered           | 4 VC_38_0    | 4  | 0.1746 | 0.99998341 | 0.1746 | 0 | 0 | 0 | 1      | Ref |
| MK448667 | Unassigned | Unassigned | Unassigned | 649_1  | Clustered           | 14 VC_649_1  | 14 | 0.5226 | 1          | 0.5226 | 0 | 0 | 0 | 0.8352 | Ref |
| MK448671 | Unassigned | Unassigned | Unassigned | 425_0  | Clustered           | 40 VC_425_0  | 40 | 0.8399 | 1          | 0.8399 | 0 | 0 | 0 | 0.9974 | Ref |
| MK448672 | Unassigned | Unassigned | Unassigned | 757_0  | Clustered           | 5 VC_757_0   | 5  | 0.0972 | 0.99999635 | 0.0972 | 0 | 0 | 0 | 0.6    | Ref |
| MK448673 | Unassigned | Unassigned | Unassigned | 797_1  | Clustered           | 14 VC_797_1  | 14 | 0.2785 | 1          | 0.2785 | 0 | 0 | 0 | 0.7582 | Ref |
| MK448674 | Unassigned | Unassigned | Unassigned | 647_0  | Clustered           | 37 VC_647_0  | 37 | 0.5847 | 1          | 0.5847 | 0 | 0 | 0 | 0.9234 | Ref |
| MK448675 | Unassigned | Unassigned | Unassigned | 300_3  | Clustered           | 19 VC_300_3  | 19 | 0.2631 | 1          | 0.2631 | 0 | 0 | 0 | 0.8187 | Ref |
| MK448676 | Unassigned | Unassigned | Unassigned | 300_3  | Clustered           | 19 VC_300_3  | 19 | 0.2631 | 1          | 0.2631 | 0 | 0 | 0 | 0.8187 | Ref |
| MK448678 | Unassigned | Unassigned | Unassigned | 795_0  | Clustered           | 23 VC_795_0  | 23 | 0.5497 | 1          | 0.5497 | 0 | 0 | 0 | 1      | Ref |
| MK448680 | Unassigned | Unassigned | Unassigned | 431_0  | Clustered           | 5 VC_431_0   | 5  | 0.2522 | 0.99999997 | 0.2522 | 0 | 0 | 0 | 1      | Ref |
| MK448681 | Unassigned | Unassigned | Unassigned | 653_0  | Clustered           | 9 VC_653_0   | 9  | 0.2315 | 1          | 0.2315 | 0 | 0 | 0 | 0.9722 | Ref |
| MK448683 | Unassigned | Unassigned | Unassigned | 653_0  | Clustered           | 9 VC_653_0   | 9  | 0.2315 | 1          | 0.2315 | 0 | 0 | 0 | 0.9722 | Ref |
| MK448684 | Unassigned | Unassigned | Unassigned | 431_0  | Clustered           | 5 VC_431_0   | 5  | 0.2522 | 0.99999997 | 0.2522 | 0 | 0 | 0 | 1      | Ref |
| MK448686 | Unassigned | Unassigned | Unassigned | 429_0  | Clustered           | 14 VC_429_0  | 14 | 0.2582 | 1          | 0.2582 | 0 | 0 | 0 | 0.989  | Ref |
| MK448688 | Unassigned | Unassigned | Unassigned | 300_3  | Clustered           | 19 VC_300_3  | 19 | 0.2631 | 1          | 0.2631 | 0 | 0 | 0 | 0.8187 | Ref |
| MK448689 | Unassigned | Unassigned | Unassigned | 795_0  | Clustered           | 23 VC_795_0  | 23 | 0.5497 | 1          | 0.5497 | 0 | 0 | 0 | 1      | Ref |
| MK448690 | Unassigned | Unassigned | Unassigned | 300_3  | Clustered           | 19 VC_300_3  | 19 | 0.2631 | 1          | 0.2631 | 0 | 0 | 0 | 0.8187 | Ref |
| MK448692 | Unassigned | Unassigned | Unassigned | 445_0  | Clustered           | 9 VC_445_0   | 9  | 0.1674 | 1          | 0.1674 | 0 | 0 | 0 | 1      | Ref |
| MK448693 | Unassigned | Unassigned | Unassigned | 795_0  | Clustered           | 23 VC_795_0  | 23 | 0.5497 | 1          | 0.5497 | 0 | 0 | 0 | 1      | Ref |
| MK448694 | Unassigned | Unassigned | Unassigned | 300_3  | Clustered           | 19 VC_300_3  | 19 | 0.2631 | 1          | 0.2631 | 0 | 0 | 0 | 0.8187 | Ref |
| MK448696 | Unassigned | Unassigned | Unassigned | 795_0  | Clustered           | 23 VC_795_0  | 23 | 0.5497 | 1          | 0.5497 | 0 | 0 | 0 | 1      | Ref |
| MK448697 | Unassigned | Unassigned | Unassigned | 795_0  | Clustered           | 23 VC_795_0  | 23 | 0.5497 | 1          | 0.5497 | 0 | 0 | 0 | 1      | Ref |
| MK448698 | Unassigned | Unassigned | Unassigned | 431_0  | Clustered           | 5 VC_431_0   | 5  | 0.2522 | 0.99999997 | 0.2522 | 0 | 0 | 0 | 1      | Ref |
| MK448699 | Unassigned | Unassigned | Unassigned | 795_0  | Clustered           | 23 VC_795_0  | 23 | 0.5497 | 1          | 0.5497 | 0 | 0 | 0 | 1      | Ref |
| MK448700 | Unassigned | Unassigned | Unassigned | 649_1  | Clustered           | 14 VC_649_1  | 14 | 0.5226 | 1          | 0.5226 | 0 | 0 | 0 | 0.8352 | Ref |
| MK448702 | Unassigned | Unassigned | Unassigned | 445_0  | Clustered           | 9 VC_445_0   | 9  | 0.1674 | 1          | 0.1674 | 0 | 0 | 0 | 1      | Ref |
| MK448704 | Unassigned | Unassigned | Unassigned | 299_0  | Clustered           | 4 VC_299_0   | 4  | 0.1735 | 0.99998669 | 0.1735 | 0 | 0 | 0 | 1      | Ref |
| MK448706 | Unassigned | Unassigned | Unassigned | 268_0  | Clustered           | 10 VC_268_0  | 10 | 0.1417 | 1          | 0.1417 | 0 | 0 | 0 | 0.9333 | Ref |
| MK448707 | Unassigned | Unassigned | Unassigned | 299_0  | Clustered           | 4 VC_299_0   | 4  | 0.1735 | 0.99998669 | 0.1735 | 0 | 0 | 0 | 1      | Ref |
| MK448708 | Unassigned | Unassigned | Unassigned | 425_0  | Clustered           | 40 VC_425_0  | 40 | 0.8399 | 1          | 0.8399 | 0 | 0 | 0 | 0.9974 | Ref |
| MK448709 | Unassigned | Unassigned | Unassigned | 299_0  | Clustered           | 4 VC_299_0   | 4  | 0.1735 | 0.99998669 | 0.1735 | 0 | 0 | 0 | 1      | Ref |
| MK448710 | Unassigned | Unassigned | Unassigned | 299_0  | Clustered           | 4 VC_299_0   | 4  | 0.1735 | 0.99998669 | 0.1735 | 0 | 0 | 0 | 1      | Ref |
| MK448711 | Unassigned | Unassigned | Unassigned | 445_0  | Clustered           | 9 VC_445_0   | 9  | 0.1674 | 1          | 0.1674 | 0 | 0 | 0 | 1      | Ref |
| MK448714 | Unassigned | Unassigned | Unassigned | 425_0  | Clustered           | 40 VC_425_0  | 40 | 0.8399 | 1          | 0.8399 | 0 | 0 | 0 | 0.9974 | Ref |
| MK448716 | Unassigned | Unassigned | Unassigned | 445_0  | Clustered           | 9 VC_445_0   | 9  | 0.1674 | 1          | 0.1674 | 0 | 0 | 0 | 1      | Ref |
| MK448720 | Unassigned | Unassigned | Unassigned | 649_1  | Clustered           | 14 VC_649_1  | 14 | 0.5226 | 1          | 0.5226 | 0 | 0 | 0 | 0.8352 | Ref |



|          |            |            |            |       |                     |             |    |        |            |        |   |   |   |        |     |
|----------|------------|------------|------------|-------|---------------------|-------------|----|--------|------------|--------|---|---|---|--------|-----|
| MK448721 | Unassigned | Unassigned | Unassigned | 268_0 | Clustered           | 10 VC_268_0 | 10 | 0.1417 | 1          | 0.1417 | 0 | 0 | 0 | 0.9333 | Ref |
| MK448724 | Unassigned | Unassigned | Unassigned | 445_0 | Clustered           | 9 VC_445_0  | 9  | 0.1674 | 1          | 0.1674 | 0 | 0 | 0 | 1      | Ref |
| MK448725 | Unassigned | Unassigned | Unassigned | 344_0 | Clustered           | 30 VC_344_0 | 30 | 0.523  | 1          | 0.523  | 0 | 0 | 0 | 0.9954 | Ref |
| MK448730 | Unassigned | Unassigned | Unassigned | 445_0 | Clustered           | 9 VC_445_0  | 9  | 0.1674 | 1          | 0.1674 | 0 | 0 | 0 | 1      | Ref |
| MK448732 | Unassigned | Unassigned | Unassigned | 344_0 | Clustered           | 30 VC_344_0 | 30 | 0.523  | 1          | 0.523  | 0 | 0 | 0 | 0.9954 | Ref |
| MK448733 | Unassigned | Unassigned | Unassigned | 426_0 | Clustered           | 3 VC_426_0  | 3  | 0.041  | 0.99840705 | 0.0409 | 0 | 0 | 0 | 1      | Ref |
| MK448735 | Unassigned | Unassigned | Unassigned | 331_2 | Clustered           | 7 VC_331_2  | 7  | 0.1554 | 1          | 0.1554 | 0 | 0 | 0 | 0.9524 | Ref |
| MK448739 | Unassigned | Unassigned | Unassigned | 344_0 | Clustered           | 30 VC_344_0 | 30 | 0.523  | 1          | 0.523  | 0 | 0 | 0 | 0.9954 | Ref |
| MK448740 | Unassigned | Unassigned | Unassigned | 300_2 | Clustered           | 2 VC_300_2  | 2  | 0.0333 | 0.9570047  | 0.0319 | 0 | 0 | 0 | 1      | Ref |
| MK448741 | Unassigned | Unassigned | Unassigned | 647_0 | Clustered           | 37 VC_647_0 | 37 | 0.5847 | 1          | 0.5847 | 0 | 0 | 0 | 0.9234 | Ref |
| MK448743 | Unassigned | Unassigned | Unassigned | 331_2 | Clustered           | 7 VC_331_2  | 7  | 0.1554 | 1          | 0.1554 | 0 | 0 | 0 | 0.9524 | Ref |
| MK448744 | Unassigned | Unassigned | Unassigned | 445_0 | Clustered           | 9 VC_445_0  | 9  | 0.1674 | 1          | 0.1674 | 0 | 0 | 0 | 1      | Ref |
| MK448745 | Unassigned | Unassigned | Unassigned | 445_0 | Clustered           | 9 VC_445_0  | 9  | 0.1674 | 1          | 0.1674 | 0 | 0 | 0 | 1      | Ref |
| MK448750 | Unassigned | Unassigned | Unassigned | 300_0 | Clustered/Singleton | 1 VC_300_0  | 1  | 0      | 1          | 0      | 0 | 0 | 0 | 1      | Ref |
| MK448752 | Unassigned | Unassigned | Unassigned | 647_0 | Clustered           | 37 VC_647_0 | 37 | 0.5847 | 1          | 0.5847 | 0 | 0 | 0 | 0.9234 | Ref |
| MK448757 | Unassigned | Unassigned | Unassigned | 331_1 | Clustered           | 5 VC_331_1  | 5  | 0.1517 | 0.99999997 | 0.1517 | 0 | 0 | 0 | 1      | Ref |
| MK448758 | Unassigned | Unassigned | Unassigned | 331_1 | Clustered           | 5 VC_331_1  | 5  | 0.1517 | 0.99999997 | 0.1517 | 0 | 0 | 0 | 1      | Ref |
| MK448759 | Unassigned | Unassigned | Unassigned | 331_1 | Clustered           | 5 VC_331_1  | 5  | 0.1517 | 0.99999997 | 0.1517 | 0 | 0 | 0 | 1      | Ref |
| MK448762 | Unassigned | Unassigned | Unassigned | 429_0 | Clustered           | 14 VC_429_0 | 14 | 0.2582 | 1          | 0.2582 | 0 | 0 | 0 | 0.989  | Ref |
| MK448765 | Unassigned | Unassigned | Unassigned | 797_1 | Clustered           | 14 VC_797_1 | 14 | 0.2785 | 1          | 0.2785 | 0 | 0 | 0 | 0.7582 | Ref |
| MK448766 | Unassigned | Unassigned | Unassigned | 795_0 | Clustered           | 23 VC_795_0 | 23 | 0.5497 | 1          | 0.5497 | 0 | 0 | 0 | 1      | Ref |
| MK448769 | Unassigned | Unassigned | Unassigned | 431_0 | Clustered           | 5 VC_431_0  | 5  | 0.2522 | 0.99999997 | 0.2522 | 0 | 0 | 0 | 1      | Ref |
| MK448772 | Unassigned | Unassigned | Unassigned | 300_3 | Clustered           | 19 VC_300_3 | 19 | 0.2631 | 1          | 0.2631 | 0 | 0 | 0 | 0.8187 | Ref |
| MK448775 | Unassigned | Unassigned | Unassigned | 797_1 | Clustered           | 14 VC_797_1 | 14 | 0.2785 | 1          | 0.2785 | 0 | 0 | 0 | 0.7582 | Ref |
| MK448778 | Unassigned | Unassigned | Unassigned | 300_3 | Clustered           | 19 VC_300_3 | 19 | 0.2631 | 1          | 0.2631 | 0 | 0 | 0 | 0.8187 | Ref |
| MK448779 | Unassigned | Unassigned | Unassigned | 795_0 | Clustered           | 23 VC_795_0 | 23 | 0.5497 | 1          | 0.5497 | 0 | 0 | 0 | 1      | Ref |
| MK448782 | Unassigned | Unassigned | Unassigned | 300_3 | Clustered           | 19 VC_300_3 | 19 | 0.2631 | 1          | 0.2631 | 0 | 0 | 0 | 0.8187 | Ref |
| MK448783 | Unassigned | Unassigned | Unassigned | 653_0 | Clustered           | 9 VC_653_0  | 9  | 0.2315 | 1          | 0.2315 | 0 | 0 | 0 | 0.9722 | Ref |
| MK448784 | Unassigned | Unassigned | Unassigned | 795_0 | Clustered           | 23 VC_795_0 | 23 | 0.5497 | 1          | 0.5497 | 0 | 0 | 0 | 1      | Ref |
| MK448788 | Unassigned | Unassigned | Unassigned | 429_0 | Clustered           | 14 VC_429_0 | 14 | 0.2582 | 1          | 0.2582 | 0 | 0 | 0 | 0.989  | Ref |
| MK448789 | Unassigned | Unassigned | Unassigned | 795_0 | Clustered           | 23 VC_795_0 | 23 | 0.5497 | 1          | 0.5497 | 0 | 0 | 0 | 1      | Ref |
| MK448790 | Unassigned | Unassigned | Unassigned | 653_0 | Clustered           | 9 VC_653_0  | 9  | 0.2315 | 1          | 0.2315 | 0 | 0 | 0 | 0.9722 | Ref |
| MK448791 | Unassigned | Unassigned | Unassigned | 429_0 | Clustered           | 14 VC_429_0 | 14 | 0.2582 | 1          | 0.2582 | 0 | 0 | 0 | 0.989  | Ref |
| MK448793 | Unassigned | Unassigned | Unassigned | 429_0 | Clustered           | 14 VC_429_0 | 14 | 0.2582 | 1          | 0.2582 | 0 | 0 | 0 | 0.989  | Ref |
| MK448794 | Unassigned | Unassigned | Unassigned | 797_1 | Clustered           | 14 VC_797_1 | 14 | 0.2785 | 1          | 0.2785 | 0 | 0 | 0 | 0.7582 | Ref |
| MK448795 | Unassigned | Unassigned | Unassigned | 797_1 | Clustered           | 14 VC_797_1 | 14 | 0.2785 | 1          | 0.2785 | 0 | 0 | 0 | 0.7582 | Ref |
| MK448797 | Unassigned | Unassigned | Unassigned | 795_0 | Clustered           | 23 VC_795_0 | 23 | 0.5497 | 1          | 0.5497 | 0 | 0 | 0 | 1      | Ref |
| MK448798 | Unassigned | Unassigned | Unassigned | 653_0 | Clustered           | 9 VC_653_0  | 9  | 0.2315 | 1          | 0.2315 | 0 | 0 | 0 | 0.9722 | Ref |
| MK448804 | Unassigned | Unassigned | Unassigned | 347_0 | Clustered           | 6 VC_347_0  | 6  | 0.3746 | 1          | 0.3746 | 0 | 0 | 0 | 1      | Ref |
| MK448805 | Unassigned | Unassigned | Unassigned | 347_0 | Clustered           | 6 VC_347_0  | 6  | 0.3746 | 1          | 0.3746 | 0 | 0 | 0 | 1      | Ref |
| MK448807 | Unassigned | Unassigned | Unassigned | 347_0 | Clustered           | 6 VC_347_0  | 6  | 0.3746 | 1          | 0.3746 | 0 | 0 | 0 | 1      | Ref |
| MK448808 | Unassigned | Unassigned | Unassigned | 347_0 | Clustered           | 6 VC_347_0  | 6  | 0.3746 | 1          | 0.3746 | 0 | 0 | 0 | 1      | Ref |
| MK448811 | Unassigned | Unassigned | Unassigned | 647_0 | Clustered           | 37 VC_647_0 | 37 | 0.5847 | 1          | 0.5847 | 0 | 0 | 0 | 0.9234 | Ref |
| MK448814 | Unassigned | Unassigned | Unassigned | 268_1 | Clustered           | 20 VC_268_1 | 20 | 0.1906 | 1          | 0.1906 | 0 | 0 | 0 | 0.6789 | Ref |
| MK448815 | Unassigned | Unassigned | Unassigned | 347_0 | Clustered           | 6 VC_347_0  | 6  | 0.3746 | 1          | 0.3746 | 0 | 0 | 0 | 1      | Ref |
| MK448818 | Unassigned | Unassigned | Unassigned | 814_0 | Clustered/Singleton | 1 VC_814_0  | 1  | 0      | 1          | 0      | 0 | 0 | 0 | 1      | Ref |
| MK448819 | Unassigned | Unassigned | Unassigned | 647_0 | Clustered           | 37 VC_647_0 | 37 | 0.5847 | 1          | 0.5847 | 0 | 0 | 0 | 0.9234 | Ref |
| MK448820 | Unassigned | Unassigned | Unassigned | 426_1 | Clustered/Singleton | 1 VC_426_1  | 1  | 0      | 1          | 0      | 0 | 0 | 0 | 1      | Ref |
| MK448821 | Unassigned | Unassigned | Unassigned | 331_0 | Clustered           | 2 VC_331_0  | 2  | 0.0289 | 0.95661675 | 0.0276 | 0 | 0 | 0 | 1      | Ref |
| MK448822 | Unassigned | Unassigned | Unassigned | 331_0 | Clustered           | 2 VC_331_0  | 2  | 0.0289 | 0.95661675 | 0.0276 | 0 | 0 | 0 | 1      | Ref |
| MK448824 | Unassigned | Unassigned | Unassigned | 265_0 | Clustered           | 3 VC_265_0  | 3  | 0.1136 | 0.9985864  | 0.1135 | 0 | 0 | 0 | 1      | Ref |
| MK448828 | Unassigned | Unassigned | Unassigned | 647_0 | Clustered           | 37 VC_647_0 | 37 | 0.5847 | 1          | 0.5847 | 0 | 0 | 0 | 0.9234 | Ref |
| MK448830 | Unassigned | Unassigned | Unassigned | 344_0 | Clustered           | 30 VC_344_0 | 30 | 0.523  | 1          | 0.523  | 0 | 0 | 0 | 0.9954 | Ref |
| MK448831 | Unassigned | Unassigned | Unassigned | 425_0 | Clustered           | 40 VC_425_0 | 40 | 0.8399 | 1          | 0.8399 | 0 | 0 | 0 | 0.9974 | Ref |
| MK448832 | Unassigned | Unassigned | Unassigned | 301_0 | Clustered           | 2 VC_301_0  | 2  | 0.0851 | 0.95735478 | 0.0814 | 0 | 0 | 0 | 1      | Ref |
| MK448833 | Unassigned | Unassigned | Unassigned | 653_0 | Clustered           | 9 VC_653_0  | 9  | 0.2315 | 1          | 0.2315 | 0 | 0 | 0 | 0.9722 | Ref |
| MK448834 | Unassigned | Unassigned | Unassigned | 425_0 | Clustered           | 40 VC_425_0 | 40 | 0.8399 | 1          | 0.8399 | 0 | 0 | 0 | 0.9974 | Ref |
| MK448839 | Unassigned | Unassigned | Unassigned | 649_1 | Clustered           | 14 VC_649_1 | 14 | 0.5226 | 1          | 0.5226 | 0 | 0 | 0 | 0.8352 | Ref |
| MK448841 | Unassigned | Unassigned | Unassigned | 649_1 | Clustered           | 14 VC_649_1 | 14 | 0.5226 | 1          | 0.5226 | 0 | 0 | 0 | 0.8352 | Ref |
| MK448842 | Unassigned | Unassigned | Unassigned | 344_0 | Clustered           | 30 VC_344_0 | 30 | 0.523  | 1          | 0.523  | 0 | 0 | 0 | 0.9954 | Ref |
| MK448843 | Unassigned | Unassigned | Unassigned | 649_1 | Clustered           | 14 VC_649_1 | 14 | 0.5226 | 1          | 0.5226 | 0 | 0 | 0 | 0.8352 | Ref |
| MK448849 | Unassigned | Unassigned | Unassigned | 757_0 | Clustered           | 5 VC_757_0  | 5  | 0.0972 | 0.99999635 | 0.0972 | 0 | 0 | 0 | 0.6    | Ref |
| MK448850 | Unassigned | Unassigned | Unassigned | 300_3 | Clustered           | 19 VC_300_3 | 19 | 0.2631 | 1          | 0.2631 | 0 | 0 | 0 | 0.8187 | Ref |
| MK448852 | Unassigned | Unassigned | Unassigned | 795_0 | Clustered           | 23 VC_795_0 | 23 | 0.5497 | 1          | 0.5497 | 0 | 0 | 0 | 1      | Ref |
| MK448854 | Unassigned | Unassigned | Unassigned | 797_0 | Clustered           | 3 VC_797_0  | 3  | 0.036  | 0.99850226 | 0.036  | 0 | 0 | 0 | 1      | Ref |
| MK448858 | Unassigned | Unassigned | Unassigned | 797_1 | Clustered           | 14 VC_797_1 | 14 | 0.2785 | 1          | 0.2785 | 0 | 0 | 0 | 0.7582 | Ref |
| MK448859 | Unassigned | Unassigned | Unassigned | 300_3 | Clustered           | 19 VC_300_3 | 19 | 0.2631 | 1          | 0.2631 | 0 | 0 | 0 | 0.8187 | Ref |
| MK448861 | Unassigned | Unassigned | Unassigned | 425_0 | Clustered           | 40 VC_425_0 | 40 | 0.8399 | 1          | 0.8399 | 0 | 0 | 0 | 0.9974 | Ref |
| MK448862 | Unassigned | Unassigned | Unassigned | 429_0 | Clustered           | 14 VC_429_0 | 14 | 0.2582 | 1          | 0.2582 | 0 | 0 | 0 | 0.989  | Ref |
| MK448864 | Unassigned | Unassigned | Unassigned | 797_1 | Clustered           | 14 VC_797_1 | 14 | 0.2785 | 1          | 0.2785 | 0 | 0 | 0 | 0.7582 | Ref |
| MK448866 | Unassigned | Unassigned | Unassigned | 795_0 | Clustered           | 23 VC_795_0 | 23 | 0.5497 | 1          | 0.5497 | 0 | 0 | 0 | 1      | Ref |
| MK448867 | Unassigned | Unassigned | Unassigned | 795_0 | Clustered           | 23 VC_795_0 | 23 | 0.5497 | 1          | 0.5497 | 0 | 0 | 0 | 1      | Ref |
| MK448868 | Unassigned | Unassigned | Unassigned | 795_0 | Clustered           | 23 VC_795_0 | 23 | 0.5497 | 1          | 0.5497 | 0 | 0 | 0 | 1      | Ref |
| MK448871 | Unassigned | Unassigned | Unassigned | 795_0 | Clustered           | 23 VC_795_0 | 23 | 0.5497 | 1          | 0.5497 | 0 | 0 | 0 | 1      | Ref |
| MK448874 | Unassigned | Unassigned | Unassigned | 425_0 | Clustered           | 40 VC_425_0 | 40 | 0.8399 | 1          | 0.8399 | 0 | 0 | 0 | 0.9974 | Ref |
| MK448875 | Unassigned | Unassigned | Unassigned | 425_0 | Clustered           | 40 VC_425_0 | 40 | 0.8399 | 1          | 0.8399 | 0 | 0 | 0 | 0.9974 | Ref |
| MK448877 | Unassigned | Unassigned | Unassigned | 300_3 | Clustered           | 19 VC_300_3 | 19 | 0.2631 | 1          | 0.2631 | 0 | 0 | 0 | 0.8187 | Ref |
| MK448881 | Unassigned | Unassigned | Unassigned | 268_1 | Clustered           | 20 VC_268_1 | 20 | 0.1906 | 1          | 0.1906 | 0 | 0 | 0 | 0.6789 | Ref |
| MK448882 | Unassigned | Unassigned | Unassigned | 268_1 | Clustered           | 20 VC_268_1 | 20 | 0.1906 | 1          | 0.1906 | 0 | 0 | 0 | 0.6789 | Ref |
| MK448886 | Unassigned | Unassigned | Unassigned | 425_0 | Clustered           | 40 VC_425_0 | 40 | 0.8399 | 1          | 0.8399 | 0 | 0 | 0 | 0.9974 | Ref |
| MK448887 | Unassigned | Unassigned | Unassigned | 425_0 | Clustered           | 40 VC_425_0 | 40 | 0.8399 | 1          | 0.8399 | 0 | 0 | 0 | 0.9974 | Ref |



|          |            |            |            |        |                     |              |    |        |            |        |   |   |   |            |
|----------|------------|------------|------------|--------|---------------------|--------------|----|--------|------------|--------|---|---|---|------------|
| MK448889 | Unassigned | Unassigned | Unassigned | 757_0  | Clustered           | 5 VC_757_0   | 5  | 0.0972 | 0.99999635 | 0.0972 | 0 | 0 | 0 | 0.6 Ref    |
| MK448893 | Unassigned | Unassigned | Unassigned | 331_2  | Clustered           | 7 VC_331_2   | 7  | 0.1554 | 1          | 0.1554 | 0 | 0 | 0 | 0.9524 Ref |
| MK448894 | Unassigned | Unassigned | Unassigned | 344_0  | Clustered           | 30 VC_344_0  | 30 | 0.523  | 1          | 0.523  | 0 | 0 | 0 | 0.9954 Ref |
| MK448895 | Unassigned | Unassigned | Unassigned | 431_0  | Clustered           | 5 VC_431_0   | 5  | 0.2522 | 0.99999997 | 0.2522 | 0 | 0 | 0 | 1 Ref      |
| MK448896 | Unassigned | Unassigned | Unassigned | 268_1  | Clustered           | 20 VC_268_1  | 20 | 0.1906 | 1          | 0.1906 | 0 | 0 | 0 | 0.6789 Ref |
| MK448897 | Unassigned | Unassigned | Unassigned | 425_0  | Clustered           | 40 VC_425_0  | 40 | 0.8399 | 1          | 0.8399 | 0 | 0 | 0 | 0.9974 Ref |
| MK448898 | Unassigned | Unassigned | Unassigned | 425_0  | Clustered           | 40 VC_425_0  | 40 | 0.8399 | 1          | 0.8399 | 0 | 0 | 0 | 0.9974 Ref |
| MK448900 | Unassigned | Unassigned | Unassigned | 268_3  | Clustered/Singleton | 1 VC_268_3   | 1  | 0      | 1          | 0      | 0 | 0 | 0 | 1 Ref      |
| MK448901 | Unassigned | Unassigned | Unassigned | 344_0  | Clustered           | 30 VC_344_0  | 30 | 0.523  | 1          | 0.523  | 0 | 0 | 0 | 0.9954 Ref |
| MK448903 | Unassigned | Unassigned | Unassigned | 331_2  | Clustered           | 7 VC_331_2   | 7  | 0.1554 | 1          | 0.1554 | 0 | 0 | 0 | 0.9524 Ref |
| MK448904 | Unassigned | Unassigned | Unassigned | 426_0  | Clustered           | 3 VC_426_0   | 3  | 0.041  | 0.99840705 | 0.0409 | 0 | 0 | 0 | 1 Ref      |
| MK448905 | Unassigned | Unassigned | Unassigned | 425_0  | Clustered           | 40 VC_425_0  | 40 | 0.8399 | 1          | 0.8399 | 0 | 0 | 0 | 0.9974 Ref |
| MK448909 | Unassigned | Unassigned | Unassigned | 268_1  | Clustered           | 20 VC_268_1  | 20 | 0.1906 | 1          | 0.1906 | 0 | 0 | 0 | 0.6789 Ref |
| MK448912 | Unassigned | Unassigned | Unassigned | 344_0  | Clustered           | 30 VC_344_0  | 30 | 0.523  | 1          | 0.523  | 0 | 0 | 0 | 0.9954 Ref |
| MK448914 | Unassigned | Unassigned | Unassigned | 344_0  | Clustered           | 30 VC_344_0  | 30 | 0.523  | 1          | 0.523  | 0 | 0 | 0 | 0.9954 Ref |
| MK448915 | Unassigned | Unassigned | Unassigned | 331_2  | Clustered           | 7 VC_331_2   | 7  | 0.1554 | 1          | 0.1554 | 0 | 0 | 0 | 0.9524 Ref |
| MK448917 | Unassigned | Unassigned | Unassigned | 300_2  | Clustered           | 2 VC_300_2   | 2  | 0.0333 | 0.9570047  | 0.0319 | 0 | 0 | 0 | 1 Ref      |
| MK448918 | Unassigned | Unassigned | Unassigned | 344_0  | Clustered           | 30 VC_344_0  | 30 | 0.523  | 1          | 0.523  | 0 | 0 | 0 | 0.9954 Ref |
| MK448919 | Unassigned | Unassigned | Unassigned | 331_2  | Clustered           | 7 VC_331_2   | 7  | 0.1554 | 1          | 0.1554 | 0 | 0 | 0 | 0.9524 Ref |
| MK448920 | Unassigned | Unassigned | Unassigned | 344_0  | Clustered           | 30 VC_344_0  | 30 | 0.523  | 1          | 0.523  | 0 | 0 | 0 | 0.9954 Ref |
| MK448921 | Unassigned | Unassigned | Unassigned | 331_2  | Clustered           | 7 VC_331_2   | 7  | 0.1554 | 1          | 0.1554 | 0 | 0 | 0 | 0.9524 Ref |
| MK448923 | Unassigned | Unassigned | Unassigned | 445_0  | Clustered           | 9 VC_445_0   | 9  | 0.1674 | 1          | 0.1674 | 0 | 0 | 0 | 1 Ref      |
| MK448925 | Unassigned | Unassigned | Unassigned | 425_0  | Clustered           | 40 VC_425_0  | 40 | 0.8399 | 1          | 0.8399 | 0 | 0 | 0 | 0.9974 Ref |
| MK448927 | Unassigned | Unassigned | Unassigned | 425_0  | Clustered           | 40 VC_425_0  | 40 | 0.8399 | 1          | 0.8399 | 0 | 0 | 0 | 0.9974 Ref |
| MK448931 | Unassigned | Unassigned | Unassigned | 300_3  | Clustered           | 19 VC_300_3  | 19 | 0.2631 | 1          | 0.2631 | 0 | 0 | 0 | 0.8187 Ref |
| MK448933 | Unassigned | Unassigned | Unassigned | 797_0  | Clustered           | 3 VC_797_0   | 3  | 0.036  | 0.99850226 | 0.036  | 0 | 0 | 0 | 1 Ref      |
| MK448934 | Unassigned | Unassigned | Unassigned | 649_1  | Clustered           | 14 VC_649_1  | 14 | 0.5226 | 1          | 0.5226 | 0 | 0 | 0 | 0.8352 Ref |
| MK448939 | Unassigned | Unassigned | Unassigned | 331_1  | Clustered           | 5 VC_331_1   | 5  | 0.1517 | 0.99999997 | 0.1517 | 0 | 0 | 0 | 1 Ref      |
| MK448941 | Unassigned | Unassigned | Unassigned | 797_1  | Clustered           | 14 VC_797_1  | 14 | 0.2785 | 1          | 0.2785 | 0 | 0 | 0 | 0.7582 Ref |
| MK448944 | Unassigned | Unassigned | Unassigned | 797_1  | Clustered           | 14 VC_797_1  | 14 | 0.2785 | 1          | 0.2785 | 0 | 0 | 0 | 0.7582 Ref |
| MK448945 | Unassigned | Unassigned | Unassigned | 797_1  | Clustered           | 14 VC_797_1  | 14 | 0.2785 | 1          | 0.2785 | 0 | 0 | 0 | 0.7582 Ref |
| MK448946 | Unassigned | Unassigned | Unassigned | 797_1  | Clustered           | 14 VC_797_1  | 14 | 0.2785 | 1          | 0.2785 | 0 | 0 | 0 | 0.7582 Ref |
| MK448947 | Unassigned | Unassigned | Unassigned | 795_0  | Clustered           | 23 VC_795_0  | 23 | 0.5497 | 1          | 0.5497 | 0 | 0 | 0 | 1 Ref      |
| MK448949 | Unassigned | Unassigned | Unassigned | 429_0  | Clustered           | 14 VC_429_0  | 14 | 0.2582 | 1          | 0.2582 | 0 | 0 | 0 | 0.989 Ref  |
| MK448950 | Unassigned | Unassigned | Unassigned | 797_0  | Clustered           | 3 VC_797_0   | 3  | 0.036  | 0.99850226 | 0.036  | 0 | 0 | 0 | 1 Ref      |
| MK448951 | Unassigned | Unassigned | Unassigned | 429_0  | Clustered           | 14 VC_429_0  | 14 | 0.2582 | 1          | 0.2582 | 0 | 0 | 0 | 0.989 Ref  |
| MK448952 | Unassigned | Unassigned | Unassigned | 795_0  | Clustered           | 23 VC_795_0  | 23 | 0.5497 | 1          | 0.5497 | 0 | 0 | 0 | 1 Ref      |
| MK448953 | Unassigned | Unassigned | Unassigned | 797_1  | Clustered           | 14 VC_797_1  | 14 | 0.2785 | 1          | 0.2785 | 0 | 0 | 0 | 0.7582 Ref |
| MK448954 | Unassigned | Unassigned | Unassigned | 429_0  | Clustered           | 14 VC_429_0  | 14 | 0.2582 | 1          | 0.2582 | 0 | 0 | 0 | 0.989 Ref  |
| MK448955 | Unassigned | Unassigned | Unassigned | 300_3  | Clustered           | 19 VC_300_3  | 19 | 0.2631 | 1          | 0.2631 | 0 | 0 | 0 | 0.8187 Ref |
| MK448957 | Unassigned | Unassigned | Unassigned | 797_1  | Clustered           | 14 VC_797_1  | 14 | 0.2785 | 1          | 0.2785 | 0 | 0 | 0 | 0.7582 Ref |
| MK448958 | Unassigned | Unassigned | Unassigned | 429_0  | Clustered           | 14 VC_429_0  | 14 | 0.2582 | 1          | 0.2582 | 0 | 0 | 0 | 0.989 Ref  |
| MK448959 | Unassigned | Unassigned | Unassigned | 429_0  | Clustered           | 14 VC_429_0  | 14 | 0.2582 | 1          | 0.2582 | 0 | 0 | 0 | 0.989 Ref  |
| MK448960 | Unassigned | Unassigned | Unassigned | 429_0  | Clustered           | 14 VC_429_0  | 14 | 0.2582 | 1          | 0.2582 | 0 | 0 | 0 | 0.989 Ref  |
| MK448961 | Unassigned | Unassigned | Unassigned | 795_0  | Clustered           | 23 VC_795_0  | 23 | 0.5497 | 1          | 0.5497 | 0 | 0 | 0 | 1 Ref      |
| MK448962 | Unassigned | Unassigned | Unassigned | 300_3  | Clustered           | 19 VC_300_3  | 19 | 0.2631 | 1          | 0.2631 | 0 | 0 | 0 | 0.8187 Ref |
| MK448965 | Unassigned | Unassigned | Unassigned | 429_0  | Clustered           | 14 VC_429_0  | 14 | 0.2582 | 1          | 0.2582 | 0 | 0 | 0 | 0.989 Ref  |
| MK448966 | Unassigned | Unassigned | Unassigned | 300_3  | Clustered           | 19 VC_300_3  | 19 | 0.2631 | 1          | 0.2631 | 0 | 0 | 0 | 0.8187 Ref |
| MK448967 | Unassigned | Unassigned | Unassigned | 653_0  | Clustered           | 9 VC_653_0   | 9  | 0.2315 | 1          | 0.2315 | 0 | 0 | 0 | 0.9722 Ref |
| MK448968 | Unassigned | Unassigned | Unassigned | 795_0  | Clustered           | 23 VC_795_0  | 23 | 0.5497 | 1          | 0.5497 | 0 | 0 | 0 | 1 Ref      |
| MK448970 | Unassigned | Unassigned | Unassigned | 797_1  | Clustered           | 14 VC_797_1  | 14 | 0.2785 | 1          | 0.2785 | 0 | 0 | 0 | 0.7582 Ref |
| MK448973 | Unassigned | Unassigned | Unassigned | 300_3  | Clustered           | 19 VC_300_3  | 19 | 0.2631 | 1          | 0.2631 | 0 | 0 | 0 | 0.8187 Ref |
| MK448974 | Unassigned | Unassigned | Unassigned | 795_0  | Clustered           | 23 VC_795_0  | 23 | 0.5497 | 1          | 0.5497 | 0 | 0 | 0 | 1 Ref      |
| MK448975 | Unassigned | Unassigned | Unassigned | 300_3  | Clustered           | 19 VC_300_3  | 19 | 0.2631 | 1          | 0.2631 | 0 | 0 | 0 | 0.8187 Ref |
| MK448976 | Unassigned | Unassigned | Unassigned | 795_0  | Clustered           | 23 VC_795_0  | 23 | 0.5497 | 1          | 0.5497 | 0 | 0 | 0 | 1 Ref      |
| MK448977 | Unassigned | Unassigned | Unassigned | 429_0  | Clustered           | 14 VC_429_0  | 14 | 0.2582 | 1          | 0.2582 | 0 | 0 | 0 | 0.989 Ref  |
| MK448983 | Unassigned | Unassigned | Unassigned | 647_0  | Clustered           | 37 VC_647_0  | 37 | 0.5847 | 1          | 0.5847 | 0 | 0 | 0 | 0.9234 Ref |
| MK448988 | Unassigned | Unassigned | Unassigned | 268_1  | Clustered           | 20 VC_268_1  | 20 | 0.1906 | 1          | 0.1906 | 0 | 0 | 0 | 0.6789 Ref |
| MK448989 | Unassigned | Unassigned | Unassigned | 268_1  | Clustered           | 20 VC_268_1  | 20 | 0.1906 | 1          | 0.1906 | 0 | 0 | 0 | 0.6789 Ref |
| MK448991 | Unassigned | Unassigned | Unassigned | 347_0  | Clustered           | 6 VC_347_0   | 6  | 0.3746 | 1          | 0.3746 | 0 | 0 | 0 | 1 Ref      |
| MK448995 | Unassigned | Unassigned | Unassigned | 300_1  | Clustered/Singleton | 1 VC_300_1   | 1  | 0      | 1          | 0      | 0 | 0 | 0 | 1 Ref      |
| MK448997 | Unassigned | Unassigned | Unassigned | 649_1  | Clustered           | 14 VC_649_1  | 14 | 0.5226 | 1          | 0.5226 | 0 | 0 | 0 | 0.8352 Ref |
| MK449000 | Unassigned | Unassigned | Unassigned | 346_0  | Clustered/Singleton | 1 VC_346_0   | 1  | 0      | 1          | 0      | 0 | 0 | 0 | 1 Ref      |
| MK449002 | Unassigned | Unassigned | Unassigned | 265_0  | Clustered           | 3 VC_265_0   | 3  | 0.1136 | 0.9985864  | 0.1135 | 0 | 0 | 0 | 1 Ref      |
| MK449003 | Unassigned | Unassigned | Unassigned | 265_0  | Clustered           | 3 VC_265_0   | 3  | 0.1136 | 0.9985864  | 0.1135 | 0 | 0 | 0 | 1 Ref      |
| MK449004 | Unassigned | Unassigned | Unassigned | 300_3  | Clustered           | 19 VC_300_3  | 19 | 0.2631 | 1          | 0.2631 | 0 | 0 | 0 | 0.8187 Ref |
| MK449006 | Unassigned | Unassigned | Unassigned | 425_0  | Clustered           | 40 VC_425_0  | 40 | 0.8399 | 1          | 0.8399 | 0 | 0 | 0 | 0.9974 Ref |
| MK449008 | Unassigned | Unassigned | Unassigned | 301_0  | Clustered           | 2 VC_301_0   | 2  | 0.0851 | 0.95735478 | 0.0814 | 0 | 0 | 0 | 1 Ref      |
| MK449009 | Unassigned | Unassigned | Unassigned | 425_0  | Clustered           | 40 VC_425_0  | 40 | 0.8399 | 1          | 0.8399 | 0 | 0 | 0 | 0.9974 Ref |
| MK449010 | Unassigned | Unassigned | Unassigned | 653_0  | Clustered           | 9 VC_653_0   | 9  | 0.2315 | 1          | 0.2315 | 0 | 0 | 0 | 0.9722 Ref |
| MK450421 | Unassigned | Unassigned | Unassigned | 386_0  | Clustered           | 10 VC_386_0  | 10 | 0.7454 | 1          | 0.7454 | 0 | 0 | 0 | 1 Ref      |
| MK450422 | Unassigned | Unassigned | Unassigned | 579_65 | Clustered           | 2 VC_579_65  | 2  | 0.0032 | 0.60938642 | 0.0019 | 0 | 0 | 0 | 1 Ref      |
| MK450423 | Unassigned | Unassigned | Unassigned | 579_22 | Clustered           | 4 VC_579_22  | 4  | 0.0099 | 0.99020449 | 0.0098 | 0 | 0 | 0 | 0.8333 Ref |
| MK450424 | Unassigned | Unassigned | Unassigned | 579_41 | Clustered/Singleton | 1 VC_579_41  | 1  | 0      | 1          | 0      | 0 | 0 | 0 | 1 Ref      |
| MK450425 | Unassigned | Unassigned | Unassigned | 579_57 | Clustered/Singleton | 1 VC_579_57  | 1  | 0      | 1          | 0      | 0 | 0 | 0 | 1 Ref      |
| MK450426 | Unassigned | Unassigned | Unassigned | 386_0  | Clustered           | 10 VC_386_0  | 10 | 0.7454 | 1          | 0.7454 | 0 | 0 | 0 | 1 Ref      |
| MK450427 | Unassigned | Unassigned | Unassigned | 579_14 | Clustered           | 8 VC_579_14  | 8  | 0.0227 | 0.99904117 | 0.0227 | 0 | 0 | 0 | 0.8214 Ref |
| MK450428 | Unassigned | Unassigned | Unassigned | 893_1  | Clustered           | 20 VC_893_1  | 20 | 0.4792 | 1          | 0.4792 | 0 | 0 | 0 | 1 Ref      |
| MK450429 | Unassigned | Unassigned | Unassigned | 579_50 | Clustered           | 15 VC_579_50 | 15 | 0.0467 | 1          | 0.0467 | 0 | 0 | 0 | 0.9238 Ref |
| MK450430 | Unassigned | Unassigned | Unassigned | 893_1  | Clustered           | 20 VC_893_1  | 20 | 0.4792 | 1          | 0.4792 | 0 | 0 | 0 | 1 Ref      |
| MK450431 | Unassigned | Unassigned | Unassigned | 386_0  | Clustered           | 10 VC_386_0  | 10 | 0.7454 | 1          | 0.7454 | 0 | 0 | 0 | 1 Ref      |



|          |            |            |            |        |                     |              |     |        |             |        |   |   |   |        |     |
|----------|------------|------------|------------|--------|---------------------|--------------|-----|--------|-------------|--------|---|---|---|--------|-----|
| MK450432 | Unassigned | Unassigned | Unassigned | 579_20 | Clustered           | 17 VC_579_20 | 17  | 0.0538 | 1           | 0.0538 | 0 | 0 | 0 | 0.9926 | Ref |
| MK450433 | Unassigned | Unassigned | Unassigned | 386_0  | Clustered           | 10 VC_386_0  | 10  | 0.7454 | 1           | 0.7454 | 0 | 0 | 0 | 1      | Ref |
| MK450434 | Unassigned | Unassigned | Unassigned | 579_50 | Clustered           | 15 VC_579_50 | 15  | 0.0467 | 1           | 0.0467 | 0 | 0 | 0 | 0.9238 | Ref |
| MK450435 | Unassigned | Unassigned | Unassigned | 893_1  | Clustered           | 20 VC_893_1  | 20  | 0.4792 | 1           | 0.4792 | 0 | 0 | 0 | 1      | Ref |
| MK450436 | Unassigned | Unassigned | Unassigned | 893_1  | Clustered           | 20 VC_893_1  | 20  | 0.4792 | 1           | 0.4792 | 0 | 0 | 0 | 1      | Ref |
| MK450538 | Unassigned | Unassigned | Unassigned | 15_1   | Clustered           | 9 VC_15_1    | 9   | 0.1817 | 1           | 0.1817 | 0 | 0 | 0 | 0.9167 | Ref |
| MK450543 | Unassigned | Unassigned | Unassigned | 364_0  | Clustered           | 3 VC_364_0   | 3   | 0.729  | 0.98867275  | 0.7207 | 0 | 0 | 0 | 1      | Ref |
| MK455769 | Unassigned | Unassigned | Unassigned | 1067_0 | Clustered           | 20 VC_1067_0 | 20  | 0.7109 | 1           | 0.7109 | 0 | 0 | 0 | 1      | Ref |
| MK455770 | Unassigned | Unassigned | Unassigned | 1067_0 | Clustered           | 20 VC_1067_0 | 20  | 0.7109 | 1           | 0.7109 | 0 | 0 | 0 | 1      | Ref |
| MK460245 | Unassigned | Unassigned | Unassigned | 1015_1 | Clustered           | 26 VC_1015_1 | 26  | 0.6989 | 1           | 0.6989 | 0 | 0 | 0 | 1      | Ref |
| MK460246 | Unassigned | Unassigned | Unassigned | 244_3  | Clustered           | 8 VC_244_3   | 8   | 0.1086 | 1           | 0.1086 | 0 | 0 | 0 | 1      | Ref |
| MK460247 | Unassigned | Unassigned | Unassigned | 243_0  | Clustered           | 72 VC_243_0  | 72  | 0.8089 | 1           | 0.8089 | 0 | 0 | 0 | 1      | Ref |
| MK460248 | Unassigned | Unassigned | Unassigned | 1114_3 | Clustered           | 16 VC_1114_3 | 16  | 0.2336 | 1           | 0.2336 | 0 | 0 | 0 | 0.9667 | Ref |
| MK468591 | Unassigned | Unassigned | Unassigned | 232_0  | Clustered           | 32 VC_232_0  | 32  | 0.8471 | 1           | 0.8471 | 0 | 0 | 0 | 0.996  | Ref |
| MK473373 | Unassigned | Unassigned | Unassigned | 1070_0 | Clustered           | 3 VC_1070_0  | 3   | 0.7872 | 0.99542416  | 0.7836 | 0 | 0 | 0 | 1      | Ref |
| MK473382 | Unassigned | Unassigned | Unassigned | 666_0  | Clustered           | 11 VC_666_0  | 11  | 0.5822 | 1           | 0.5822 | 0 | 0 | 0 | 1      | Ref |
| MK474470 | Unassigned | Unassigned | Unassigned | 861_0  | Clustered           | 29 VC_861_0  | 29  | 0.9954 | 1           | 0.9954 | 0 | 0 | 0 | 1      | Ref |
| MK479295 | Unassigned | Unassigned | Unassigned | 560_0  | Clustered           | 15 VC_560_0  | 15  | 0.2846 | 1           | 0.2846 | 0 | 0 | 0 | 1      | Ref |
| MK482688 | Unassigned | Unassigned | Unassigned | 340_7  | Clustered           | 18 VC_340_7  | 18  | 0.0936 | 1           | 0.0936 | 0 | 0 | 0 | 0.7778 | Ref |
| MK482689 | Unassigned | Unassigned | Unassigned | 340_7  | Clustered           | 18 VC_340_7  | 18  | 0.0936 | 1           | 0.0936 | 0 | 0 | 0 | 0.7778 | Ref |
| MK482690 | Unassigned | Unassigned | Unassigned | 340_7  | Clustered           | 18 VC_340_7  | 18  | 0.0936 | 1           | 0.0936 | 0 | 0 | 0 | 0.7778 | Ref |
| MK483107 | Unassigned | Unassigned | Unassigned | 548_0  | Clustered           | 9 VC_548_0   | 9   | 0.8018 | 1           | 0.8018 | 0 | 0 | 0 | 1      | Ref |
| MK494087 | Unassigned | Unassigned | Unassigned | 222_1  | Clustered           | 19 VC_222_1  | 19  | 0.4166 | 1           | 0.4166 | 0 | 0 | 0 | 1      | Ref |
| MK494088 | Unassigned | Unassigned | Unassigned | 535_1  | Clustered           | 108 VC_535_1 | 108 | 0.8479 | 1           | 0.8479 | 0 | 0 | 0 | 0.9955 | Ref |
| MK494089 | Unassigned | Unassigned | Unassigned | 1087_0 | Clustered           | 7 VC_1087_0  | 7   | 0.94   | 1           | 0.94   | 0 | 0 | 0 | 1      | Ref |
| MK494090 | Unassigned | Unassigned | Unassigned | 230_0  | Clustered           | 38 VC_230_0  | 38  | 0.9076 | 1           | 0.9076 | 0 | 0 | 0 | 1      | Ref |
| MK494091 | Unassigned | Unassigned | Unassigned | 974_0  | Clustered           | 34 VC_974_0  | 34  | 0.7953 | 1           | 0.7953 | 0 | 0 | 0 | 1      | Ref |
| MK494093 | Unassigned | Unassigned | Unassigned | 535_1  | Clustered           | 108 VC_535_1 | 108 | 0.8479 | 1           | 0.8479 | 0 | 0 | 0 | 0.9955 | Ref |
| MK494094 | Unassigned | Unassigned | Unassigned | 535_1  | Clustered           | 108 VC_535_1 | 108 | 0.8479 | 1           | 0.8479 | 0 | 0 | 0 | 0.9955 | Ref |
| MK494095 | Unassigned | Unassigned | Unassigned | 834_0  | Clustered           | 18 VC_834_0  | 18  | 0.9116 | 1           | 0.9116 | 0 | 0 | 0 | 1      | Ref |
| MK494096 | Unassigned | Unassigned | Unassigned | 532_0  | Clustered           | 75 VC_532_0  | 75  | 0.9393 | 1           | 0.9393 | 0 | 0 | 0 | 1      | Ref |
| MK494097 | Unassigned | Unassigned | Unassigned | 535_1  | Clustered           | 108 VC_535_1 | 108 | 0.8479 | 1           | 0.8479 | 0 | 0 | 0 | 0.9955 | Ref |
| MK494098 | Unassigned | Unassigned | Unassigned | 896_0  | Clustered           | 9 VC_896_0   | 9   | 0.2604 | 1           | 0.2604 | 0 | 0 | 0 | 1      | Ref |
| MK494099 | Unassigned | Unassigned | Unassigned | 702_0  | Clustered           | 2 VC_702_0   | 2   | 0.2123 | 0.9539194   | 0.2025 | 0 | 0 | 0 | 1      | Ref |
| MK494101 | Unassigned | Unassigned | Unassigned | 535_1  | Clustered           | 108 VC_535_1 | 108 | 0.8479 | 1           | 0.8479 | 0 | 0 | 0 | 0.9955 | Ref |
| MK494102 | Unassigned | Unassigned | Unassigned | 585_0  | Clustered           | 20 VC_585_0  | 20  | 0.8376 | 1           | 0.8376 | 0 | 0 | 0 | 1      | Ref |
| MK494103 | Unassigned | Unassigned | Unassigned | 985_0  | Clustered           | 38 VC_985_0  | 38  | 0.9334 | 1           | 0.9334 | 0 | 0 | 0 | 1      | Ref |
| MK494104 | Unassigned | Unassigned | Unassigned | 384_16 | Clustered           | 42 VC_384_16 | 42  | 0.134  | 1           | 0.134  | 0 | 0 | 0 | 0.7282 | Ref |
| MK494105 | Unassigned | Unassigned | Unassigned | 784_0  | Clustered           | 9 VC_784_0   | 9   | 0.0884 | 1           | 0.0884 | 0 | 0 | 0 | 1      | Ref |
| MK494106 | Unassigned | Unassigned | Unassigned | 893_1  | Clustered           | 20 VC_893_1  | 20  | 0.4792 | 1           | 0.4792 | 0 | 0 | 0 | 1      | Ref |
| MK494107 | Unassigned | Unassigned | Unassigned | 1117_0 | Clustered           | 19 VC_1117_0 | 19  | 0.9177 | 1           | 0.9177 | 0 | 0 | 0 | 1      | Ref |
| MK494108 | Unassigned | Unassigned | Unassigned | 232_0  | Clustered           | 32 VC_232_0  | 32  | 0.8471 | 1           | 0.8471 | 0 | 0 | 0 | 0.996  | Ref |
| MK494109 | Unassigned | Unassigned | Unassigned | 893_1  | Clustered           | 20 VC_893_1  | 20  | 0.4792 | 1           | 0.4792 | 0 | 0 | 0 | 1      | Ref |
| MK494110 | Unassigned | Unassigned | Unassigned | 538_45 | Clustered           | 7 VC_538_45  | 7   | 0.0632 | 1           | 0.0632 | 0 | 0 | 0 | 0.8095 | Ref |
| MK494111 | Unassigned | Unassigned | Unassigned | 985_0  | Clustered           | 38 VC_985_0  | 38  | 0.9334 | 1           | 0.9334 | 0 | 0 | 0 | 1      | Ref |
| MK494112 | Unassigned | Unassigned | Unassigned | 1114_3 | Clustered           | 16 VC_1114_3 | 16  | 0.2336 | 1           | 0.2336 | 0 | 0 | 0 | 0.9667 | Ref |
| MK494113 | Unassigned | Unassigned | Unassigned | 229_0  | Clustered           | 5 VC_229_0   | 5   | 0.0566 | 0.99999997  | 0.0566 | 0 | 0 | 0 | 1      | Ref |
| MK494114 | Unassigned | Unassigned | Unassigned | 525_0  | Clustered           | 8 VC_525_0   | 8   | 0.443  | 1           | 0.443  | 0 | 0 | 0 | 1      | Ref |
| MK494115 | Unassigned | Unassigned | Unassigned | 535_0  | Clustered           | 18 VC_535_0  | 18  | 0.1595 | 1           | 0.1595 | 0 | 0 | 0 | 1      | Ref |
| MK494116 | Unassigned | Unassigned | Unassigned | 335_45 | Clustered           | 4 VC_335_45  | 4   | 0.0143 | 0.999998616 | 0.0143 | 0 | 0 | 0 | 0.8333 | Ref |
| MK494117 | Unassigned | Unassigned | Unassigned | 535_0  | Clustered           | 18 VC_535_0  | 18  | 0.1595 | 1           | 0.1595 | 0 | 0 | 0 | 1      | Ref |
| MK494118 | Unassigned | Unassigned | Unassigned | 538_72 | Clustered/Singleton | 1 VC_538_72  | 1   | 0      | 1           | 0      | 0 | 0 | 0 | 1      | Ref |
| MK494119 | Unassigned | Unassigned | Unassigned | 244_0  | Clustered           | 4 VC_244_0   | 4   | 0.0426 | 0.999998759 | 0.0426 | 0 | 0 | 0 | 1      | Ref |
| MK494121 | Unassigned | Unassigned | Unassigned | 893_1  | Clustered           | 20 VC_893_1  | 20  | 0.4792 | 1           | 0.4792 | 0 | 0 | 0 | 1      | Ref |
| MK494122 | Unassigned | Unassigned | Unassigned | 537_0  | Clustered           | 39 VC_537_0  | 39  | 0.8148 | 1           | 0.8148 | 0 | 0 | 0 | 1      | Ref |
| MK494123 | Unassigned | Unassigned | Unassigned | 973_0  | Clustered           | 15 VC_973_0  | 15  | 1      | 0           | 0      | 0 | 0 | 0 | 1      | Ref |
| MK494124 | Unassigned | Unassigned | Unassigned | 533_0  | Clustered           | 16 VC_533_0  | 16  | 0.3765 | 1           | 0.3765 | 0 | 0 | 0 | 1      | Ref |
| MK494125 | Unassigned | Unassigned | Unassigned | 535_1  | Clustered           | 108 VC_535_1 | 108 | 0.8479 | 1           | 0.8479 | 0 | 0 | 0 | 0.9955 | Ref |
| MK494126 | Unassigned | Unassigned | Unassigned | 535_1  | Clustered           | 108 VC_535_1 | 108 | 0.8479 | 1           | 0.8479 | 0 | 0 | 0 | 0.9955 | Ref |
| MK494127 | Unassigned | Unassigned | Unassigned | 531_0  | Clustered           | 32 VC_531_0  | 32  | 0.6859 | 1           | 0.6859 | 0 | 0 | 0 | 1      | Ref |
| MK494128 | Unassigned | Unassigned | Unassigned | 532_0  | Clustered           | 75 VC_532_0  | 75  | 0.9393 | 1           | 0.9393 | 0 | 0 | 0 | 1      | Ref |
| MK494129 | Unassigned | Unassigned | Unassigned | 535_0  | Clustered           | 18 VC_535_0  | 18  | 0.1595 | 1           | 0.1595 | 0 | 0 | 0 | 1      | Ref |
| MK494130 | Unassigned | Unassigned | Unassigned | 228_0  | Clustered           | 22 VC_228_0  | 22  | 0.7411 | 1           | 0.7411 | 0 | 0 | 0 | 1      | Ref |
| MK494131 | Unassigned | Unassigned | Unassigned | 525_0  | Clustered           | 8 VC_525_0   | 8   | 0.443  | 1           | 0.443  | 0 | 0 | 0 | 1      | Ref |
| MK494132 | Unassigned | Unassigned | Unassigned | 525_0  | Clustered           | 8 VC_525_0   | 8   | 0.443  | 1           | 0.443  | 0 | 0 | 0 | 1      | Ref |
| MK496679 | Unassigned | Unassigned | Unassigned | 1437_0 | Clustered           | 5 VC_1437_0  | 5   | 0.7338 | 0.52463554  | 0.385  | 0 | 0 | 0 | 1      | Ref |
| MK496680 | Unassigned | Unassigned | Unassigned | 1437_0 | Clustered           | 5 VC_1437_0  | 5   | 0.7338 | 0.52463554  | 0.385  | 0 | 0 | 0 | 1      | Ref |
| MK496681 | Unassigned | Unassigned | Unassigned | 1439_0 | Clustered           | 2 VC_1439_0  | 2   | 0.6463 | 0.86822376  | 0.5611 | 0 | 0 | 0 | 1      | Ref |
| MK496682 | Unassigned | Unassigned | Unassigned | 1432_0 | Clustered           | 2 VC_1432_0  | 2   | 1      | 1           | 1      | 0 | 0 | 0 | 1      | Ref |
| MK496683 | Unassigned | Unassigned | Unassigned | 1440_0 | Clustered           | 2 VC_1440_0  | 2   | 1      | 1           | 1      | 0 | 0 | 0 | 1      | Ref |
| MK496685 | Unassigned | Unassigned | Unassigned | 1322_0 | Clustered           | 6 VC_1322_0  | 6   | 0.7063 | 0.92055725  | 0.6502 | 0 | 0 | 0 | 1      | Ref |
| MK496686 | Unassigned | Unassigned | Unassigned | 1441_0 | Clustered           | 2 VC_1441_0  | 2   | 1      | 1           | 1      | 0 | 0 | 0 | 1      | Ref |
| MK496688 | Unassigned | Unassigned | Unassigned | 1442_0 | Clustered           | 3 VC_1442_0  | 3   | 1      | 1           | 1      | 0 | 0 | 0 | 1      | Ref |
| MK496689 | Unassigned | Unassigned | Unassigned | 1443_0 | Clustered           | 3 VC_1443_0  | 3   | 1      | 0           | 0      | 0 | 0 | 0 | 1      | Ref |
| MK496690 | Unassigned | Unassigned | Unassigned | 1442_0 | Clustered           | 3 VC_1442_0  | 3   | 1      | 1           | 1      | 0 | 0 | 0 | 1      | Ref |
| MK496692 | Unassigned | Unassigned | Unassigned | 1390_0 | Clustered           | 2 VC_1390_0  | 2   | 1      | 1           | 1      | 0 | 0 | 0 | 1      | Ref |
| MK496693 | Unassigned | Unassigned | Unassigned | 1241_0 | Clustered           | 13 VC_1241_0 | 13  | 0.8675 | 0.76044592  | 0.6597 | 0 | 0 | 0 | 1      | Ref |
| MK496694 | Unassigned | Unassigned | Unassigned | 1299_0 | Clustered           | 53 VC_1299_0 | 53  | 0.8666 | 1           | 0.8666 | 0 | 0 | 0 | 1      | Ref |
| MK496696 | Unassigned | Unassigned | Unassigned | 1357_0 | Clustered           | 7 VC_1357_0  | 7   | 1      | 1           | 1      | 0 | 0 | 0 | 1      | Ref |
| MK496697 | Unassigned | Unassigned | Unassigned | 1444_0 | Clustered           | 2 VC_1444_0  | 2   | 1      | 1           | 1      | 0 | 0 | 0 | 1      | Ref |
| MK496698 | Unassigned | Unassigned | Unassigned | 1438_0 | Clustered           | 2 VC_1438_0  | 2   | 0.1773 | 0.73645537  | 0.1306 | 0 | 0 | 0 | 1      | Ref |



|          |            |            |            |        |                     |              |    |        |            |        |   |   |   |            |
|----------|------------|------------|------------|--------|---------------------|--------------|----|--------|------------|--------|---|---|---|------------|
| MK496699 | Unassigned | Unassigned | Unassigned | 1445_0 | Clustered           | 2 VC_1445_0  | 2  | 1      | 1          | 1      | 0 | 0 | 0 | 1 Ref      |
| MK496700 | Unassigned | Unassigned | Unassigned | 1443_0 | Clustered           | 3 VC_1443_0  | 3  | 1      | 0          | 0      | 0 | 0 | 0 | 1 Ref      |
| MK496701 | Unassigned | Unassigned | Unassigned | 1446_0 | Clustered           | 2 VC_1446_0  | 2  | 1      | 1          | 1      | 0 | 0 | 0 | 1 Ref      |
| MK496702 | Unassigned | Unassigned | Unassigned | 1446_0 | Clustered           | 2 VC_1446_0  | 2  | 1      | 1          | 1      | 0 | 0 | 0 | 1 Ref      |
| MK496704 | Unassigned | Unassigned | Unassigned | 1356_0 | Clustered           | 4 VC_1356_0  | 4  | 0.8682 | 0.91151676 | 0.7914 | 0 | 0 | 0 | 1 Ref      |
| MK496710 | Unassigned | Unassigned | Unassigned | 1447_0 | Clustered           | 3 VC_1447_0  | 3  | 1      | 1          | 1      | 0 | 0 | 0 | 1 Ref      |
| MK496711 | Unassigned | Unassigned | Unassigned | 1357_0 | Clustered           | 7 VC_1357_0  | 7  | 1      | 1          | 1      | 0 | 0 | 0 | 1 Ref      |
| MK496712 | Unassigned | Unassigned | Unassigned | 1448_0 | Clustered           | 2 VC_1448_0  | 2  | 1      | 1          | 1      | 0 | 0 | 0 | 1 Ref      |
| MK496714 | Unassigned | Unassigned | Unassigned | 1176_0 | Clustered           | 6 VC_1176_0  | 6  | 0.1252 | 0.96352059 | 0.1206 | 0 | 0 | 0 | 1 Ref      |
| MK496716 | Unassigned | Unassigned | Unassigned | 1449_0 | Clustered           | 2 VC_1449_0  | 2  | 0.6396 | 0.72985431 | 0.4668 | 0 | 0 | 0 | 1 Ref      |
| MK496717 | Unassigned | Unassigned | Unassigned | 1450_0 | Clustered           | 2 VC_1450_0  | 2  | 1      | 1          | 1      | 0 | 0 | 0 | 1 Ref      |
| MK496719 | Unassigned | Unassigned | Unassigned | 1151_0 | Clustered           | 2 VC_1151_0  | 2  | 0.2002 | 0.77749564 | 0.1557 | 0 | 0 | 0 | 1 Ref      |
| MK496720 | Unassigned | Unassigned | Unassigned | 1451_0 | Clustered           | 2 VC_1451_0  | 2  | 1      | 1          | 1      | 0 | 0 | 0 | 1 Ref      |
| MK496721 | Unassigned | Unassigned | Unassigned | 1452_0 | Clustered           | 3 VC_1452_0  | 3  | 1      | 0          | 0      | 0 | 0 | 0 | 1 Ref      |
| MK496723 | Unassigned | Unassigned | Unassigned | 1095_0 | Clustered           | 12 VC_1095_0 | 12 | 0.2819 | 0.99837092 | 0.2814 | 0 | 0 | 0 | 1 Ref      |
| MK496725 | Unassigned | Unassigned | Unassigned | 1453_0 | Clustered           | 3 VC_1453_0  | 3  | 0.7356 | 0.96173875 | 0.7075 | 0 | 0 | 0 | 1 Ref      |
| MK496726 | Unassigned | Unassigned | Unassigned | 1147_0 | Clustered           | 6 VC_1147_0  | 6  | 0.3066 | 0.99999957 | 0.3066 | 0 | 0 | 0 | 1 Ref      |
| MK496729 | Unassigned | Unassigned | Unassigned | 1356_0 | Clustered           | 4 VC_1356_0  | 4  | 0.8682 | 0.91151676 | 0.7914 | 0 | 0 | 0 | 1 Ref      |
| MK496732 | Unassigned | Unassigned | Unassigned | 1352_0 | Clustered           | 3 VC_1352_0  | 3  | 1      | 1          | 1      | 0 | 0 | 0 | 1 Ref      |
| MK496738 | Unassigned | Unassigned | Unassigned | 1151_0 | Clustered           | 2 VC_1151_0  | 2  | 0.2002 | 0.77749564 | 0.1557 | 0 | 0 | 0 | 1 Ref      |
| MK496745 | Unassigned | Unassigned | Unassigned | 1188_0 | Clustered           | 3 VC_1188_0  | 3  | 0.2005 | 0.95837083 | 0.1922 | 0 | 0 | 0 | 1 Ref      |
| MK496746 | Unassigned | Unassigned | Unassigned | 1453_0 | Clustered           | 3 VC_1453_0  | 3  | 0.7356 | 0.96173875 | 0.7075 | 0 | 0 | 0 | 1 Ref      |
| MK496748 | Unassigned | Unassigned | Unassigned | 1454_0 | Clustered           | 2 VC_1454_0  | 2  | 1      | 1          | 1      | 0 | 0 | 0 | 1 Ref      |
| MK496750 | Unassigned | Unassigned | Unassigned | 1455_0 | Clustered           | 3 VC_1455_0  | 3  | 0.8292 | 0.5        | 0.4146 | 0 | 0 | 0 | 1 Ref      |
| MK496751 | Unassigned | Unassigned | Unassigned | 1160_0 | Clustered           | 3 VC_1160_0  | 3  | 0.2567 | 0.98675879 | 0.2533 | 0 | 0 | 0 | 1 Ref      |
| MK496753 | Unassigned | Unassigned | Unassigned | 1456_0 | Clustered           | 2 VC_1456_0  | 2  | 1      | 1          | 1      | 0 | 0 | 0 | 1 Ref      |
| MK496754 | Unassigned | Unassigned | Unassigned | 1160_0 | Clustered           | 3 VC_1160_0  | 3  | 0.2567 | 0.98675879 | 0.2533 | 0 | 0 | 0 | 1 Ref      |
| MK496756 | Unassigned | Unassigned | Unassigned | 1457_0 | Clustered           | 2 VC_1457_0  | 2  | 1      | 1          | 1      | 0 | 0 | 0 | 1 Ref      |
| MK496757 | Unassigned | Unassigned | Unassigned | 1364_0 | Clustered           | 6 VC_1364_0  | 6  | 0.9472 | 0.54366909 | 0.515  | 0 | 0 | 0 | 1 Ref      |
| MK496758 | Unassigned | Unassigned | Unassigned | 1458_0 | Clustered           | 2 VC_1458_0  | 2  | 1      | 1          | 1      | 0 | 0 | 0 | 1 Ref      |
| MK496760 | Unassigned | Unassigned | Unassigned | 1439_0 | Clustered           | 2 VC_1439_0  | 2  | 0.6463 | 0.86822376 | 0.5611 | 0 | 0 | 0 | 1 Ref      |
| MK496761 | Unassigned | Unassigned | Unassigned | 1440_0 | Clustered           | 2 VC_1440_0  | 2  | 1      | 1          | 1      | 0 | 0 | 0 | 1 Ref      |
| MK496764 | Unassigned | Unassigned | Unassigned | 1441_0 | Clustered           | 2 VC_1441_0  | 2  | 1      | 1          | 1      | 0 | 0 | 0 | 1 Ref      |
| MK496765 | Unassigned | Unassigned | Unassigned | 1354_0 | Clustered           | 6 VC_1354_0  | 6  | 0.6609 | 0.99999272 | 0.6609 | 0 | 0 | 0 | 1 Ref      |
| MK496766 | Unassigned | Unassigned | Unassigned | 1442_0 | Clustered           | 3 VC_1442_0  | 3  | 1      | 1          | 1      | 0 | 0 | 0 | 1 Ref      |
| MK496767 | Unassigned | Unassigned | Unassigned | 1447_0 | Clustered           | 3 VC_1447_0  | 3  | 1      | 1          | 1      | 0 | 0 | 0 | 1 Ref      |
| MK496768 | Unassigned | Unassigned | Unassigned | 1447_0 | Clustered           | 3 VC_1447_0  | 3  | 1      | 1          | 1      | 0 | 0 | 0 | 1 Ref      |
| MK496770 | Unassigned | Unassigned | Unassigned | 1459_0 | Clustered           | 2 VC_1459_0  | 2  | 1      | 1          | 1      | 0 | 0 | 0 | 1 Ref      |
| MK496771 | Unassigned | Unassigned | Unassigned | 1459_0 | Clustered           | 2 VC_1459_0  | 2  | 1      | 1          | 1      | 0 | 0 | 0 | 1 Ref      |
| MK496772 | Unassigned | Unassigned | Unassigned | 1438_0 | Clustered           | 2 VC_1438_0  | 2  | 0.1773 | 0.73645537 | 0.1306 | 0 | 0 | 0 | 1 Ref      |
| MK496774 | Unassigned | Unassigned | Unassigned | 1241_0 | Clustered           | 13 VC_1241_0 | 13 | 0.8675 | 0.76044592 | 0.6597 | 0 | 0 | 0 | 1 Ref      |
| MK496775 | Unassigned | Unassigned | Unassigned | 1299_0 | Clustered           | 53 VC_1299_0 | 53 | 0.8666 | 0.8666     | 0.8666 | 0 | 0 | 0 | 1 Ref      |
| MK496776 | Unassigned | Unassigned | Unassigned | 1437_0 | Clustered           | 5 VC_1437_0  | 5  | 0.7338 | 0.52463554 | 0.385  | 0 | 0 | 0 | 1 Ref      |
| MK496779 | Unassigned | Unassigned | Unassigned | 1176_0 | Clustered           | 6 VC_1176_0  | 6  | 0.1252 | 0.96352059 | 0.1206 | 0 | 0 | 0 | 1 Ref      |
| MK496780 | Unassigned | Unassigned | Unassigned | 1444_0 | Clustered           | 2 VC_1444_0  | 2  | 1      | 1          | 1      | 0 | 0 | 0 | 1 Ref      |
| MK496781 | Unassigned | Unassigned | Unassigned | 1452_0 | Clustered           | 3 VC_1452_0  | 3  | 1      | 0          | 0      | 0 | 0 | 0 | 1 Ref      |
| MK496782 | Unassigned | Unassigned | Unassigned | 1356_0 | Clustered           | 4 VC_1356_0  | 4  | 0.8682 | 0.91151676 | 0.7914 | 0 | 0 | 0 | 1 Ref      |
| MK496784 | Unassigned | Unassigned | Unassigned | 1443_0 | Clustered           | 3 VC_1443_0  | 3  | 1      | 0          | 0      | 0 | 0 | 0 | 1 Ref      |
| MK496785 | Unassigned | Unassigned | Unassigned | 1445_0 | Clustered           | 2 VC_1445_0  | 2  | 1      | 1          | 1      | 0 | 0 | 0 | 1 Ref      |
| MK496786 | Unassigned | Unassigned | Unassigned | 1452_0 | Clustered           | 3 VC_1452_0  | 3  | 1      | 0          | 0      | 0 | 0 | 0 | 1 Ref      |
| MK496787 | Unassigned | Unassigned | Unassigned | 1448_0 | Clustered           | 2 VC_1448_0  | 2  | 1      | 1          | 1      | 0 | 0 | 0 | 1 Ref      |
| MK496790 | Unassigned | Unassigned | Unassigned | 1449_0 | Clustered           | 2 VC_1449_0  | 2  | 0.6396 | 0.72985431 | 0.4668 | 0 | 0 | 0 | 1 Ref      |
| MK496792 | Unassigned | Unassigned | Unassigned | 1176_0 | Clustered           | 6 VC_1176_0  | 6  | 0.1252 | 0.96352059 | 0.1206 | 0 | 0 | 0 | 1 Ref      |
| MK496796 | Unassigned | Unassigned | Unassigned | 1451_0 | Clustered           | 2 VC_1451_0  | 2  | 1      | 1          | 1      | 0 | 0 | 0 | 1 Ref      |
| MK496803 | Unassigned | Unassigned | Unassigned | 1176_0 | Clustered           | 6 VC_1176_0  | 6  | 0.1252 | 0.96352059 | 0.1206 | 0 | 0 | 0 | 1 Ref      |
| MK496804 | Unassigned | Unassigned | Unassigned | 1450_0 | Clustered           | 2 VC_1450_0  | 2  | 1      | 1          | 1      | 0 | 0 | 0 | 1 Ref      |
| MK496808 | Unassigned | Unassigned | Unassigned | 1458_0 | Clustered           | 2 VC_1458_0  | 2  | 1      | 1          | 1      | 0 | 0 | 0 | 1 Ref      |
| MK496811 | Unassigned | Unassigned | Unassigned | 1453_0 | Clustered           | 3 VC_1453_0  | 3  | 0.7356 | 0.96173875 | 0.7075 | 0 | 0 | 0 | 1 Ref      |
| MK496812 | Unassigned | Unassigned | Unassigned | 1161_0 | Clustered           | 16 VC_1161_0 | 16 | 0.4834 | 0.99999958 | 0.4834 | 0 | 0 | 0 | 1 Ref      |
| MK496813 | Unassigned | Unassigned | Unassigned | 1161_0 | Clustered           | 16 VC_1161_0 | 16 | 0.4834 | 0.99999958 | 0.4834 | 0 | 0 | 0 | 1 Ref      |
| MK496815 | Unassigned | Unassigned | Unassigned | 1454_0 | Clustered           | 2 VC_1454_0  | 2  | 1      | 1          | 1      | 0 | 0 | 0 | 1 Ref      |
| MK496816 | Unassigned | Unassigned | Unassigned | 1455_0 | Clustered           | 3 VC_1455_0  | 3  | 0.8292 | 0.5        | 0.4146 | 0 | 0 | 0 | 1 Ref      |
| MK496818 | Unassigned | Unassigned | Unassigned | 1456_0 | Clustered           | 2 VC_1456_0  | 2  | 1      | 1          | 1      | 0 | 0 | 0 | 1 Ref      |
| MK496820 | Unassigned | Unassigned | Unassigned | 1460_0 | Clustered           | 2 VC_1460_0  | 2  | 1      | 1          | 1      | 0 | 0 | 0 | 1 Ref      |
| MK496824 | Unassigned | Unassigned | Unassigned | 1457_0 | Clustered           | 2 VC_1457_0  | 2  | 1      | 1          | 1      | 0 | 0 | 0 | 1 Ref      |
| MK496825 | Unassigned | Unassigned | Unassigned | 1028_0 | Clustered           | 69 VC_1028_0 | 69 | 0.8547 | 1          | 0.8547 | 0 | 0 | 0 | 1 Ref      |
| MK501729 | Unassigned | Unassigned | Unassigned | 1217_0 | Clustered           | 41 VC_1217_0 | 41 | 0.9546 | 1          | 0.9546 | 0 | 0 | 0 | 0.9976 Ref |
| MK501730 | Unassigned | Unassigned | Unassigned | 1217_0 | Clustered           | 41 VC_1217_0 | 41 | 0.9546 | 1          | 0.9546 | 0 | 0 | 0 | 0.9976 Ref |
| MK504442 | Unassigned | Unassigned | Unassigned | 598_0  | Clustered           | 2 VC_598_0   | 2  | 0.1903 | 0.93875121 | 0.1786 | 0 | 0 | 0 | 1 Ref      |
| MK504443 | Unassigned | Unassigned | Unassigned | 97_0   | Clustered           | 3 VC_97_0    | 3  | 0.2031 | 0.99852916 | 0.2028 | 0 | 0 | 0 | 1 Ref      |
| MK504444 | Unassigned | Unassigned | Unassigned | 544_3  | Clustered/Singleton | 1 VC_544_3   | 1  | 0      | 1          | 0      | 0 | 0 | 0 | 1 Ref      |
| MK504446 | Unassigned | Unassigned | Unassigned | 97_0   | Clustered           | 3 VC_97_0    | 3  | 0.2031 | 0.99852916 | 0.2028 | 0 | 0 | 0 | 1 Ref      |
| MK509462 | Unassigned | Unassigned | Unassigned | 133_2  | Clustered           | 7 VC_133_2   | 7  | 0.0679 | 1          | 0.0679 | 0 | 0 | 0 | 0.9048 Ref |
| MK510962 | Unassigned | Unassigned | Unassigned | 764_0  | Clustered           | 23 VC_764_0  | 23 | 0.8194 | 1          | 0.8194 | 0 | 0 | 0 | 1 Ref      |
| MK510963 | Unassigned | Unassigned | Unassigned | 764_0  | Clustered           | 23 VC_764_0  | 23 | 0.8194 | 1          | 0.8194 | 0 | 0 | 0 | 1 Ref      |
| MK510964 | Unassigned | Unassigned | Unassigned | 764_0  | Clustered           | 23 VC_764_0  | 23 | 0.8194 | 1          | 0.8194 | 0 | 0 | 0 | 1 Ref      |
| MK510965 | Unassigned | Unassigned | Unassigned | 764_0  | Clustered           | 23 VC_764_0  | 23 | 0.8194 | 1          | 0.8194 | 0 | 0 | 0 | 1 Ref      |
| MK510966 | Unassigned | Unassigned | Unassigned | 765_0  | Clustered           | 12 VC_765_0  | 12 | 0.6861 | 1          | 0.6861 | 0 | 0 | 0 | 1 Ref      |
| MK510967 | Unassigned | Unassigned | Unassigned | 765_0  | Clustered           | 12 VC_765_0  | 12 | 0.6861 | 1          | 0.6861 | 0 | 0 | 0 | 1 Ref      |
| MK510968 | Unassigned | Unassigned | Unassigned | 764_0  | Clustered           | 23 VC_764_0  | 23 | 0.8194 | 1          | 0.8194 | 0 | 0 | 0 | 1 Ref      |
| MK510969 | Unassigned | Unassigned | Unassigned | 764_0  | Clustered           | 23 VC_764_0  | 23 | 0.8194 | 1          | 0.8194 | 0 | 0 | 0 | 1 Ref      |



[illegible]



|          |            |            |            |        |                     |              |     |        |            |        |   |   |   |            |
|----------|------------|------------|------------|--------|---------------------|--------------|-----|--------|------------|--------|---|---|---|------------|
| MK511064 | Unassigned | Unassigned | Unassigned | 192_0  | Clustered           | 22 VC_192_0  | 22  | 0.6582 | 1          | 0.6582 | 0 | 0 | 0 | 1 Ref      |
| MK511065 | Unassigned | Unassigned | Unassigned | 192_0  | Clustered           | 22 VC_192_0  | 22  | 0.6582 | 1          | 0.6582 | 0 | 0 | 0 | 1 Ref      |
| MK511066 | Unassigned | Unassigned | Unassigned | 2_0    | Clustered           | 4 VC_2_0     | 4   | 0.13   | 0.99998694 | 0.13   | 0 | 0 | 0 | 1 Ref      |
| MK512531 | Unassigned | Unassigned | Unassigned | 184_0  | Clustered           | 5 VC_184_0   | 5   | 0.7721 | 0.99998991 | 0.7721 | 0 | 0 | 0 | 1 Ref      |
| MK514281 | Unassigned | Unassigned | Unassigned | 507_1  | Clustered           | 11 VC_507_1  | 11  | 0.4612 | 1          | 0.4612 | 0 | 0 | 0 | 1 Ref      |
| MK514282 | Unassigned | Unassigned | Unassigned | 994_0  | Clustered           | 5 VC_994_0   | 5   | 0.0495 | 0.99983811 | 0.0494 | 0 | 0 | 0 | 1 Ref      |
| MK514283 | Unassigned | Unassigned | Unassigned | 632_0  | Clustered           | 9 VC_632_0   | 9   | 0.9524 | 1          | 0.9524 | 0 | 0 | 0 | 1 Ref      |
| MK521904 | Unassigned | Unassigned | Unassigned | 972_0  | Clustered           | 99 VC_972_0  | 99  | 0.9113 | 1          | 0.9113 | 0 | 0 | 0 | 0.9928 Ref |
| MK521905 | Unassigned | Unassigned | Unassigned | 848_0  | Clustered           | 124 VC_848_0 | 124 | 0.9484 | 1          | 0.9484 | 0 | 0 | 0 | 1 Ref      |
| MK521906 | Unassigned | Unassigned | Unassigned | 125_0  | Clustered           | 23 VC_125_0  | 23  | 0.8163 | 1          | 0.8163 | 0 | 0 | 0 | 1 Ref      |
| MK521907 | Unassigned | Unassigned | Unassigned | 200_0  | Clustered           | 15 VC_200_0  | 15  | 0.5004 | 1          | 0.5004 | 0 | 0 | 0 | 1 Ref      |
| MK524176 | Unassigned | Unassigned | Unassigned | 340_18 | Clustered           | 7 VC_340_18  | 7   | 0.0326 | 1          | 0.0326 | 0 | 0 | 0 | 0.8095 Ref |
| MK524177 | Unassigned | Unassigned | Unassigned | 237_0  | Clustered           | 3 VC_237_0   | 3   | 0.0732 | 0.99355836 | 0.0727 | 0 | 0 | 0 | 0.6667 Ref |
| MK524178 | Unassigned | Unassigned | Unassigned | 293_11 | Clustered           | 3 VC_293_11  | 3   | 0.0146 | 0.93460284 | 0.0136 | 0 | 0 | 0 | 1 Ref      |
| MK524485 | Unassigned | Unassigned | Unassigned | 241_0  | Clustered           | 21 VC_241_0  | 21  | 0.8342 | 1          | 0.8342 | 0 | 0 | 0 | 1 Ref      |
| MK524486 | Unassigned | Unassigned | Unassigned | 385_0  | Clustered           | 24 VC_385_0  | 24  | 0.5516 | 1          | 0.5516 | 0 | 0 | 0 | 1 Ref      |
| MK524487 | Unassigned | Unassigned | Unassigned | 991_0  | Clustered           | 39 VC_991_0  | 39  | 1      | 1          | 1      | 0 | 0 | 0 | 1 Ref      |
| MK524488 | Unassigned | Unassigned | Unassigned | 241_0  | Clustered           | 21 VC_241_0  | 21  | 0.8342 | 1          | 0.8342 | 0 | 0 | 0 | 1 Ref      |
| MK524489 | Unassigned | Unassigned | Unassigned | 232_0  | Clustered           | 32 VC_232_0  | 32  | 0.8471 | 1          | 0.8471 | 0 | 0 | 0 | 0.996 Ref  |
| MK524490 | Unassigned | Unassigned | Unassigned | 385_1  | Clustered           | 9 VC_385_1   | 9   | 0.1928 | 1          | 0.1928 | 0 | 0 | 0 | 1 Ref      |
| MK524491 | Unassigned | Unassigned | Unassigned | 223_6  | Clustered           | 42 VC_223_6  | 42  | 0.4717 | 1          | 0.4717 | 0 | 0 | 0 | 0.8351 Ref |
| MK524493 | Unassigned | Unassigned | Unassigned | 783_0  | Clustered           | 67 VC_783_0  | 67  | 0.8945 | 1          | 0.8945 | 0 | 0 | 0 | 1 Ref      |
| MK524494 | Unassigned | Unassigned | Unassigned | 783_0  | Clustered           | 67 VC_783_0  | 67  | 0.8945 | 1          | 0.8945 | 0 | 0 | 0 | 1 Ref      |
| MK524495 | Unassigned | Unassigned | Unassigned | 991_0  | Clustered           | 39 VC_991_0  | 39  | 1      | 1          | 1      | 0 | 0 | 0 | 1 Ref      |
| MK524496 | Unassigned | Unassigned | Unassigned | 531_0  | Clustered           | 32 VC_531_0  | 32  | 0.6859 | 1          | 0.6859 | 0 | 0 | 0 | 1 Ref      |
| MK524497 | Unassigned | Unassigned | Unassigned | 335_21 | Clustered           | 5 VC_335_21  | 5   | 0.0208 | 0.99999976 | 0.0208 | 0 | 0 | 0 | 0.8 Ref    |
| MK524498 | Unassigned | Unassigned | Unassigned | 585_0  | Clustered           | 20 VC_585_0  | 20  | 0.8376 | 1          | 0.8376 | 0 | 0 | 0 | 1 Ref      |
| MK524499 | Unassigned | Unassigned | Unassigned | 335_22 | Clustered/Singleton | 1 VC_335_22  | 1   | 0      | 1          | 0      | 0 | 0 | 0 | 1 Ref      |
| MK524500 | Unassigned | Unassigned | Unassigned | 539_0  | Clustered           | 37 VC_539_0  | 37  | 0.911  | 1          | 0.911  | 0 | 0 | 0 | 1 Ref      |
| MK524501 | Unassigned | Unassigned | Unassigned | 1223_0 | Clustered           | 2 VC_1223_0  | 2   | 0.0456 | 0.95126432 | 0.0434 | 0 | 0 | 0 | 1 Ref      |
| MK524502 | Unassigned | Unassigned | Unassigned | 1407_0 | Clustered           | 78 VC_1407_0 | 78  | 0.9731 | 1          | 0.9731 | 0 | 0 | 0 | 1 Ref      |
| MK524503 | Unassigned | Unassigned | Unassigned | 538_87 | Clustered/Singleton | 1 VC_538_87  | 1   | 0      | 1          | 0      | 0 | 0 | 0 | 1 Ref      |
| MK524504 | Unassigned | Unassigned | Unassigned | 566_4  | Clustered           | 16 VC_566_4  | 16  | 0.2517 | 0.9999998  | 0.2517 | 0 | 0 | 0 | 0.9417 Ref |
| MK524505 | Unassigned | Unassigned | Unassigned | 1226_0 | Clustered           | 5 VC_1226_0  | 5   | 0.6594 | 0.99999982 | 0.6594 | 0 | 0 | 0 | 1 Ref      |
| MK524506 | Unassigned | Unassigned | Unassigned | 335_49 | Clustered           | 17 VC_335_49 | 17  | 0.0731 | 1          | 0.0731 | 0 | 0 | 0 | 0.7721 Ref |
| MK524507 | Unassigned | Unassigned | Unassigned | 228_0  | Clustered           | 22 VC_228_0  | 22  | 0.7411 | 1          | 0.7411 | 0 | 0 | 0 | 1 Ref      |
| MK524508 | Unassigned | Unassigned | Unassigned | 537_0  | Clustered           | 39 VC_537_0  | 39  | 0.8148 | 1          | 0.8148 | 0 | 0 | 0 | 1 Ref      |
| MK524509 | Unassigned | Unassigned | Unassigned | 539_0  | Clustered           | 37 VC_539_0  | 37  | 0.911  | 1          | 0.911  | 0 | 0 | 0 | 1 Ref      |
| MK524510 | Unassigned | Unassigned | Unassigned | 1415_0 | Clustered           | 31 VC_1415_0 | 31  | 0.8456 | 1          | 0.8456 | 0 | 0 | 0 | 1 Ref      |
| MK524511 | Unassigned | Unassigned | Unassigned | 228_0  | Clustered           | 22 VC_228_0  | 22  | 0.7411 | 1          | 0.7411 | 0 | 0 | 0 | 1 Ref      |
| MK524512 | Unassigned | Unassigned | Unassigned | 384_1  | Clustered           | 11 VC_384_1  | 11  | 0.0378 | 1          | 0.0378 | 0 | 0 | 0 | 0.8545 Ref |
| MK524513 | Unassigned | Unassigned | Unassigned | 228_0  | Clustered           | 22 VC_228_0  | 22  | 0.7411 | 1          | 0.7411 | 0 | 0 | 0 | 1 Ref      |
| MK524514 | Unassigned | Unassigned | Unassigned | 228_0  | Clustered           | 22 VC_228_0  | 22  | 0.7411 | 1          | 0.7411 | 0 | 0 | 0 | 1 Ref      |
| MK524515 | Unassigned | Unassigned | Unassigned | 539_0  | Clustered           | 37 VC_539_0  | 37  | 0.911  | 1          | 0.911  | 0 | 0 | 0 | 1 Ref      |
| MK524516 | Unassigned | Unassigned | Unassigned | 566_9  | Clustered/Singleton | 1 VC_566_9   | 1   | 0      | 1          | 0      | 0 | 0 | 0 | 1 Ref      |
| MK524517 | Unassigned | Unassigned | Unassigned | 538_38 | Clustered           | 6 VC_538_38  | 6   | 0.0517 | 1          | 0.0517 | 0 | 0 | 0 | 0.8667 Ref |
| MK524518 | Unassigned | Unassigned | Unassigned | 539_0  | Clustered           | 37 VC_539_0  | 37  | 0.911  | 1          | 0.911  | 0 | 0 | 0 | 1 Ref      |
| MK524519 | Unassigned | Unassigned | Unassigned | 228_0  | Clustered           | 22 VC_228_0  | 22  | 0.7411 | 1          | 0.7411 | 0 | 0 | 0 | 1 Ref      |
| MK524520 | Unassigned | Unassigned | Unassigned | 539_0  | Clustered           | 37 VC_539_0  | 37  | 0.911  | 1          | 0.911  | 0 | 0 | 0 | 1 Ref      |
| MK524521 | Unassigned | Unassigned | Unassigned | 566_4  | Clustered           | 16 VC_566_4  | 16  | 0.2517 | 0.99999998 | 0.2517 | 0 | 0 | 0 | 0.9417 Ref |
| MK524522 | Unassigned | Unassigned | Unassigned | 539_0  | Clustered           | 37 VC_539_0  | 37  | 0.911  | 1          | 0.911  | 0 | 0 | 0 | 1 Ref      |
| MK524523 | Unassigned | Unassigned | Unassigned | 335_16 | Clustered           | 2 VC_335_16  | 2   | 0.0094 | 0.95751393 | 0.009  | 0 | 0 | 0 | 1 Ref      |
| MK524524 | Unassigned | Unassigned | Unassigned | 1015_1 | Clustered           | 26 VC_1015_1 | 26  | 0.6989 | 1          | 0.6989 | 0 | 0 | 0 | 1 Ref      |
| MK524525 | Unassigned | Unassigned | Unassigned | 335_39 | Clustered/Singleton | 1 VC_335_39  | 1   | 0      | 1          | 0      | 0 | 0 | 0 | 1 Ref      |
| MK524526 | Unassigned | Unassigned | Unassigned | 384_1  | Clustered           | 11 VC_384_1  | 11  | 0.0378 | 1          | 0.0378 | 0 | 0 | 0 | 0.8545 Ref |
| MK524527 | Unassigned | Unassigned | Unassigned | 566_4  | Clustered           | 16 VC_566_4  | 16  | 0.2517 | 0.99999998 | 0.2517 | 0 | 0 | 0 | 0.9417 Ref |
| MK524528 | Unassigned | Unassigned | Unassigned | 539_0  | Clustered           | 37 VC_539_0  | 37  | 0.911  | 1          | 0.911  | 0 | 0 | 0 | 1 Ref      |
| MK524529 | Unassigned | Unassigned | Unassigned | 566_4  | Clustered           | 16 VC_566_4  | 16  | 0.2517 | 0.99999998 | 0.2517 | 0 | 0 | 0 | 0.9417 Ref |
| MK524530 | Unassigned | Unassigned | Unassigned | 229_0  | Clustered           | 5 VC_229_0   | 5   | 0.0566 | 0.99999997 | 0.0566 | 0 | 0 | 0 | 1 Ref      |
| MK524531 | Unassigned | Unassigned | Unassigned | 335_49 | Clustered           | 17 VC_335_49 | 17  | 0.0731 | 1          | 0.0731 | 0 | 0 | 0 | 0.7721 Ref |
| MK542015 | Unassigned | Unassigned | Unassigned | 655_0  | Clustered           | 45 VC_655_0  | 45  | 0.7722 | 1          | 0.7722 | 0 | 0 | 0 | 1 Ref      |
| MK542821 | Unassigned | Unassigned | Unassigned | 405_0  | Clustered           | 126 VC_405_0 | 126 | 0.9614 | 1          | 0.9614 | 0 | 0 | 0 | 1 Ref      |
| MK552140 | Unassigned | Unassigned | Unassigned | 67_0   | Clustered           | 2 VC_67_0    | 2   | 0.194  | 0.95487418 | 0.1852 | 0 | 0 | 0 | 1 Ref      |
| MK552141 | Unassigned | Unassigned | Unassigned | 67_0   | Clustered           | 2 VC_67_0    | 2   | 0.194  | 0.95487418 | 0.1852 | 0 | 0 | 0 | 1 Ref      |
| MK552527 | Unassigned | Unassigned | Unassigned | 356_3  | Clustered/Singleton | 1 VC_356_3   | 1   | 0      | 1          | 0      | 0 | 0 | 0 | 1 Ref      |
| MK559427 | Unassigned | Unassigned | Unassigned | 585_0  | Clustered           | 20 VC_585_0  | 20  | 0.8376 | 1          | 0.8376 | 0 | 0 | 0 | 1 Ref      |
| MK559428 | Unassigned | Unassigned | Unassigned | 232_0  | Clustered           | 32 VC_232_0  | 32  | 0.8471 | 1          | 0.8471 | 0 | 0 | 0 | 0.996 Ref  |
| MK559429 | Unassigned | Unassigned | Unassigned | 571_6  | Clustered           | 22 VC_571_6  | 22  | 0.1207 | 1          | 0.1207 | 0 | 0 | 0 | 0.8095 Ref |
| MK559459 | Unassigned | Unassigned | Unassigned | 935_0  | Clustered           | 6 VC_935_0   | 6   | 0.2317 | 1          | 0.2317 | 0 | 0 | 0 | 1 Ref      |
| MK562502 | Unassigned | Unassigned | Unassigned | 341_0  | Clustered           | 27 VC_341_0  | 27  | 0.5058 | 1          | 0.5058 | 0 | 0 | 0 | 0.8661 Ref |
| MK562503 | Unassigned | Unassigned | Unassigned | 113_0  | Clustered           | 91 VC_113_0  | 91  | 0.9584 | 1          | 0.9584 | 0 | 0 | 0 | 1 Ref      |
| MK562504 | Unassigned | Unassigned | Unassigned | 341_0  | Clustered           | 27 VC_341_0  | 27  | 0.5058 | 1          | 0.5058 | 0 | 0 | 0 | 0.8661 Ref |
| MK562505 | Unassigned | Unassigned | Unassigned | 341_0  | Clustered           | 27 VC_341_0  | 27  | 0.5058 | 1          | 0.5058 | 0 | 0 | 0 | 0.8661 Ref |
| MK568062 | Unassigned | Unassigned | Unassigned | 440_0  | Clustered           | 33 VC_440_0  | 33  | 0.992  | 1          | 0.992  | 0 | 0 | 0 | 1 Ref      |
| MK568540 | Unassigned | Unassigned | Unassigned | 549_0  | Clustered           | 9 VC_549_0   | 9   | 0.2597 | 1          | 0.2597 | 0 | 0 | 0 | 1 Ref      |
| MK570053 | Unassigned | Unassigned | Unassigned | 1461_0 | Clustered           | 3 VC_1461_0  | 3   | 0.7758 | 0.9639009  | 0.7478 | 0 | 0 | 0 | 1 Ref      |
| MK570054 | Unassigned | Unassigned | Unassigned | 1461_0 | Clustered           | 3 VC_1461_0  | 3   | 0.7758 | 0.9639009  | 0.7478 | 0 | 0 | 0 | 1 Ref      |
| MK570055 | Unassigned | Unassigned | Unassigned | 1461_0 | Clustered           | 3 VC_1461_0  | 3   | 0.7758 | 0.9639009  | 0.7478 | 0 | 0 | 0 | 1 Ref      |
| MK570225 | Unassigned | Unassigned | Unassigned | 110_0  | Clustered           | 33 VC_110_0  | 33  | 0.9488 | 1          | 0.9488 | 0 | 0 | 0 | 1 Ref      |
| MK573636 | Unassigned | Unassigned | Unassigned | 609_0  | Clustered           | 27 VC_609_0  | 27  | 0.9943 | 1          | 0.9943 | 0 | 0 | 0 | 1 Ref      |
| MK574011 | Unassigned | Unassigned | Unassigned | 119_0  | Clustered           | 9 VC_119_0   | 9   | 0.9977 | 0.98988637 | 0.9876 | 0 | 0 | 0 | 1 Ref      |



|          |            |            |            |        |           |               |     |        |            |        |   |   |   |            |
|----------|------------|------------|------------|--------|-----------|---------------|-----|--------|------------|--------|---|---|---|------------|
| MK574078 | Unassigned | Unassigned | Unassigned | 766_0  | Clustered | 40 VC_766_0   | 40  | 0.7511 | 1          | 0.7511 | 0 | 0 | 0 | 1 Ref      |
| MK577502 | Unassigned | Unassigned | Unassigned | 619_0  | Clustered | 3 VC_619_0    | 3   | 0.054  | 0.97294713 | 0.0526 | 0 | 0 | 0 | 1 Ref      |
| MK578530 | Unassigned | Unassigned | Unassigned | 654_1  | Clustered | 27 VC_654_1   | 27  | 0.2571 | 1          | 0.2571 | 0 | 0 | 0 | 0.9858 Ref |
| MK580972 | Unassigned | Unassigned | Unassigned | 524_0  | Clustered | 8 VC_524_0    | 8   | 0.7365 | 1          | 0.7365 | 0 | 0 | 0 | 1 Ref      |
| MK584893 | Unassigned | Unassigned | Unassigned | 155_8  | Clustered | 66 VC_155_8   | 66  | 0.4537 | 1          | 0.4537 | 0 | 0 | 0 | 0.8182 Ref |
| MK598851 | Unassigned | Unassigned | Unassigned | 113_0  | Clustered | 91 VC_113_0   | 91  | 0.9584 | 1          | 0.9584 | 0 | 0 | 0 | 1 Ref      |
| MK599315 | Unassigned | Unassigned | Unassigned | 356_1  | Clustered | 3 VC_356_1    | 3   | 0.0359 | 0.93699065 | 0.0336 | 0 | 0 | 0 | 1 Ref      |
| MK599416 | Unassigned | Unassigned | Unassigned | 475_0  | Clustered | 96 VC_475_0   | 96  | 0.9303 | 1          | 0.9303 | 0 | 0 | 0 | 0.9575 Ref |
| MK605242 | Unassigned | Unassigned | Unassigned | 1214_0 | Clustered | 6 VC_1214_0   | 6   | 0.9948 | 0.99999296 | 0.9948 | 0 | 0 | 0 | 1 Ref      |
| MK605243 | Unassigned | Unassigned | Unassigned | 1214_0 | Clustered | 6 VC_1214_0   | 6   | 0.9948 | 0.99999296 | 0.9948 | 0 | 0 | 0 | 1 Ref      |
| MK605244 | Unassigned | Unassigned | Unassigned | 1214_0 | Clustered | 6 VC_1214_0   | 6   | 0.9948 | 0.99999296 | 0.9948 | 0 | 0 | 0 | 1 Ref      |
| MK605245 | Unassigned | Unassigned | Unassigned | 1214_0 | Clustered | 6 VC_1214_0   | 6   | 0.9948 | 0.99999296 | 0.9948 | 0 | 0 | 0 | 1 Ref      |
| MK605246 | Unassigned | Unassigned | Unassigned | 1214_0 | Clustered | 6 VC_1214_0   | 6   | 0.9948 | 0.99999296 | 0.9948 | 0 | 0 | 0 | 1 Ref      |
| MK608335 | Unassigned | Unassigned | Unassigned | 398_0  | Clustered | 51 VC_398_0   | 51  | 0.8741 | 1          | 0.8741 | 0 | 0 | 0 | 1 Ref      |
| MK608336 | Unassigned | Unassigned | Unassigned | 1001_0 | Clustered | 3 VC_1001_0   | 3   | 0.3482 | 0.99841425 | 0.3476 | 0 | 0 | 0 | 1 Ref      |
| MK610268 | Unassigned | Unassigned | Unassigned | 465_0  | Clustered | 80 VC_465_0   | 80  | 0.9988 | 1          | 0.9988 | 0 | 0 | 0 | 1 Ref      |
| MK613343 | Unassigned | Unassigned | Unassigned | 312_0  | Clustered | 12 VC_312_0   | 12  | 0.5719 | 1          | 0.5719 | 0 | 0 | 0 | 0.8485 Ref |
| MK613344 | Unassigned | Unassigned | Unassigned | 312_0  | Clustered | 12 VC_312_0   | 12  | 0.5719 | 1          | 0.5719 | 0 | 0 | 0 | 0.8485 Ref |
| MK613345 | Unassigned | Unassigned | Unassigned | 312_0  | Clustered | 12 VC_312_0   | 12  | 0.5719 | 1          | 0.5719 | 0 | 0 | 0 | 0.8485 Ref |
| MK613346 | Unassigned | Unassigned | Unassigned | 311_0  | Clustered | 11 VC_311_0   | 11  | 0.7851 | 1          | 0.7851 | 0 | 0 | 0 | 1 Ref      |
| MK618657 | Unassigned | Unassigned | Unassigned | 972_0  | Clustered | 99 VC_972_0   | 99  | 0.9113 | 1          | 0.9113 | 0 | 0 | 0 | 0.9928 Ref |
| MK618658 | Unassigned | Unassigned | Unassigned | 848_0  | Clustered | 124 VC_848_0  | 124 | 0.9484 | 1          | 0.9484 | 0 | 0 | 0 | 1 Ref      |
| MK618715 | Unassigned | Unassigned | Unassigned | 372_0  | Clustered | 7 VC_372_0    | 7   | 0.3691 | 1          | 0.3691 | 0 | 0 | 0 | 1 Ref      |
| MK618716 | Unassigned | Unassigned | Unassigned | 12_0   | Clustered | 21 VC_12_0    | 21  | 0.2262 | 1          | 0.2262 | 0 | 0 | 0 | 0.9571 Ref |
| MK620893 | Unassigned | Unassigned | Unassigned | 571_7  | Clustered | 28 VC_571_7   | 28  | 0.1651 | 1          | 0.1651 | 0 | 0 | 0 | 0.8519 Ref |
| MK620894 | Unassigned | Unassigned | Unassigned | 1199_0 | Clustered | 3 VC_1199_0   | 3   | 0.3136 | 0.99425123 | 0.3118 | 0 | 0 | 0 | 1 Ref      |
| MK620895 | Unassigned | Unassigned | Unassigned | 1296_0 | Clustered | 82 VC_1296_0  | 82  | 0.7938 | 1          | 0.7938 | 0 | 0 | 0 | 1 Ref      |
| MK620896 | Unassigned | Unassigned | Unassigned | 1115_0 | Clustered | 2 VC_1115_0   | 2   | 0.0262 | 0.95117088 | 0.0249 | 0 | 0 | 0 | 1 Ref      |
| MK620897 | Unassigned | Unassigned | Unassigned | 1407_0 | Clustered | 78 VC_1407_0  | 78  | 0.9731 | 1          | 0.9731 | 0 | 0 | 0 | 1 Ref      |
| MK620898 | Unassigned | Unassigned | Unassigned | 526_0  | Clustered | 32 VC_526_0   | 32  | 0.9037 | 1          | 0.9037 | 0 | 0 | 0 | 1 Ref      |
| MK620900 | Unassigned | Unassigned | Unassigned | 1436_0 | Clustered | 3 VC_1436_0   | 3   | 0.9803 | 0.9595722  | 0.9406 | 0 | 0 | 0 | 1 Ref      |
| MK620901 | Unassigned | Unassigned | Unassigned | 1203_0 | Clustered | 28 VC_1203_0  | 28  | 0.4905 | 1          | 0.4905 | 0 | 0 | 0 | 1 Ref      |
| MK620902 | Unassigned | Unassigned | Unassigned | 1296_0 | Clustered | 82 VC_1296_0  | 82  | 0.7938 | 1          | 0.7938 | 0 | 0 | 0 | 1 Ref      |
| MK620903 | Unassigned | Unassigned | Unassigned | 1296_0 | Clustered | 82 VC_1296_0  | 82  | 0.7938 | 1          | 0.7938 | 0 | 0 | 0 | 1 Ref      |
| MK620904 | Unassigned | Unassigned | Unassigned | 1203_0 | Clustered | 28 VC_1203_0  | 28  | 0.4905 | 1          | 0.4905 | 0 | 0 | 0 | 1 Ref      |
| MK620905 | Unassigned | Unassigned | Unassigned | 1296_0 | Clustered | 82 VC_1296_0  | 82  | 0.7938 | 1          | 0.7938 | 0 | 0 | 0 | 1 Ref      |
| MK629527 | Unassigned | Unassigned | Unassigned | 760_0  | Clustered | 15 VC_760_0   | 15  | 1      | 1          | 1      | 0 | 0 | 0 | 1 Ref      |
| MK629528 | Unassigned | Unassigned | Unassigned | 162_0  | Clustered | 12 VC_162_0   | 12  | 0.9051 | 1          | 0.9051 | 0 | 0 | 0 | 1 Ref      |
| MK630230 | Unassigned | Unassigned | Unassigned | 200_0  | Clustered | 15 VC_200_0   | 15  | 0.5004 | 1          | 0.5004 | 0 | 0 | 0 | 1 Ref      |
| MK637516 | Unassigned | Unassigned | Unassigned | 1005_0 | Clustered | 3 VC_1005_0   | 3   | 0.8261 | 0.99765766 | 0.8242 | 0 | 0 | 0 | 1 Ref      |
| MK639187 | Unassigned | Unassigned | Unassigned | 293_13 | Clustered | 10 VC_293_13  | 10  | 0.0698 | 0.99999931 | 0.0698 | 0 | 0 | 0 | 0.9556 Ref |
| MK651787 | Unassigned | Unassigned | Unassigned | 721_0  | Clustered | 11 VC_721_0   | 11  | 0.8846 | 1          | 0.8846 | 0 | 0 | 0 | 1 Ref      |
| MK656892 | Unassigned | Unassigned | Unassigned | 155_8  | Clustered | 66 VC_155_8   | 66  | 0.4537 | 1          | 0.4537 | 0 | 0 | 0 | 0.8182 Ref |
| MK658834 | Unassigned | Unassigned | Unassigned | 9_0    | Clustered | 38 VC_9_0     | 38  | 0.4859 | 1          | 0.4859 | 0 | 0 | 0 | 1 Ref      |
| MK660712 | Unassigned | Unassigned | Unassigned | 984_0  | Clustered | 5 VC_984_0    | 5   | 0.1708 | 0.99999984 | 0.1708 | 0 | 0 | 0 | 1 Ref      |
| MK660714 | Unassigned | Unassigned | Unassigned | 1200_0 | Clustered | 73 VC_1200_0  | 73  | 0.9825 | 1          | 0.9825 | 0 | 0 | 0 | 1 Ref      |
| MK672798 | Unassigned | Unassigned | Unassigned | 819_0  | Clustered | 19 VC_819_0   | 19  | 0.6835 | 1          | 0.6835 | 0 | 0 | 0 | 1 Ref      |
| MK672799 | Unassigned | Unassigned | Unassigned | 306_0  | Clustered | 24 VC_306_0   | 24  | 0.9902 | 1          | 0.9902 | 0 | 0 | 0 | 1 Ref      |
| MK672800 | Unassigned | Unassigned | Unassigned | 306_0  | Clustered | 24 VC_306_0   | 24  | 0.9902 | 1          | 0.9902 | 0 | 0 | 0 | 1 Ref      |
| MK672801 | Unassigned | Unassigned | Unassigned | 306_0  | Clustered | 24 VC_306_0   | 24  | 0.9902 | 1          | 0.9902 | 0 | 0 | 0 | 1 Ref      |
| MK672803 | Unassigned | Unassigned | Unassigned | 306_0  | Clustered | 24 VC_306_0   | 24  | 0.9902 | 1          | 0.9902 | 0 | 0 | 0 | 1 Ref      |
| MK672804 | Unassigned | Unassigned | Unassigned | 306_0  | Clustered | 24 VC_306_0   | 24  | 0.9902 | 1          | 0.9902 | 0 | 0 | 0 | 1 Ref      |
| MK673511 | Unassigned | Unassigned | Unassigned | 440_0  | Clustered | 33 VC_440_0   | 33  | 0.992  | 1          | 0.992  | 0 | 0 | 0 | 1 Ref      |
| MK685667 | Unassigned | Unassigned | Unassigned | 125_0  | Clustered | 23 VC_125_0   | 23  | 0.8163 | 1          | 0.8163 | 0 | 0 | 0 | 1 Ref      |
| MK685668 | Unassigned | Unassigned | Unassigned | 399_0  | Clustered | 49 VC_399_0   | 49  | 0.7927 | 1          | 0.7927 | 0 | 0 | 0 | 1 Ref      |
| MK686068 | Unassigned | Unassigned | Unassigned | 386_0  | Clustered | 10 VC_386_0   | 10  | 0.7454 | 1          | 0.7454 | 0 | 0 | 0 | 1 Ref      |
| MK686069 | Unassigned | Unassigned | Unassigned | 386_0  | Clustered | 10 VC_386_0   | 10  | 0.7454 | 1          | 0.7454 | 0 | 0 | 0 | 1 Ref      |
| MK686071 | Unassigned | Unassigned | Unassigned | 891_0  | Clustered | 11 VC_891_0   | 11  | 0.9663 | 1          | 0.9663 | 0 | 0 | 0 | 1 Ref      |
| MK689364 | Unassigned | Unassigned | Unassigned | 456_2  | Clustered | 4 VC_456_2    | 4   | 0.0833 | 0.99988129 | 0.0833 | 0 | 0 | 0 | 0.8333 Ref |
| MK693005 | Unassigned | Unassigned | Unassigned | 113_0  | Clustered | 91 VC_113_0   | 91  | 0.9584 | 1          | 0.9584 | 0 | 0 | 0 | 1 Ref      |
| MK693030 | Unassigned | Unassigned | Unassigned | 93_0   | Clustered | 22 VC_93_0    | 22  | 0.5285 | 1          | 0.5285 | 0 | 0 | 0 | 1 Ref      |
| MK714353 | Unassigned | Unassigned | Unassigned | 33_0   | Clustered | 9 VC_33_0     | 9   | 0.3409 | 1          | 0.3409 | 0 | 0 | 0 | 0.6944 Ref |
| MK719701 | Unassigned | Unassigned | Unassigned | 1462_0 | Clustered | 110 VC_1462_0 | 110 | 1      | 1          | 1      | 0 | 0 | 0 | 0.9746 Ref |
| MK719702 | Unassigned | Unassigned | Unassigned | 1462_0 | Clustered | 110 VC_1462_0 | 110 | 1      | 1          | 1      | 0 | 0 | 0 | 0.9746 Ref |
| MK719703 | Unassigned | Unassigned | Unassigned | 1462_0 | Clustered | 110 VC_1462_0 | 110 | 1      | 1          | 1      | 0 | 0 | 0 | 0.9746 Ref |
| MK719704 | Unassigned | Unassigned | Unassigned | 1462_0 | Clustered | 110 VC_1462_0 | 110 | 1      | 1          | 1      | 0 | 0 | 0 | 0.9746 Ref |
| MK719705 | Unassigned | Unassigned | Unassigned | 1462_0 | Clustered | 110 VC_1462_0 | 110 | 1      | 1          | 1      | 0 | 0 | 0 | 0.9746 Ref |
| MK719706 | Unassigned | Unassigned | Unassigned | 1462_0 | Clustered | 110 VC_1462_0 | 110 | 1      | 1          | 1      | 0 | 0 | 0 | 0.9746 Ref |
| MK719707 | Unassigned | Unassigned | Unassigned | 1462_0 | Clustered | 110 VC_1462_0 | 110 | 1      | 1          | 1      | 0 | 0 | 0 | 0.9746 Ref |
| MK719708 | Unassigned | Unassigned | Unassigned | 1462_0 | Clustered | 110 VC_1462_0 | 110 | 1      | 1          | 1      | 0 | 0 | 0 | 0.9746 Ref |
| MK719709 | Unassigned | Unassigned | Unassigned | 1462_0 | Clustered | 110 VC_1462_0 | 110 | 1      | 1          | 1      | 0 | 0 | 0 | 0.9746 Ref |
| MK719710 | Unassigned | Unassigned | Unassigned | 1462_0 | Clustered | 110 VC_1462_0 | 110 | 1      | 1          | 1      | 0 | 0 | 0 | 0.9746 Ref |
| MK719711 | Unassigned | Unassigned | Unassigned | 1462_0 | Clustered | 110 VC_1462_0 | 110 | 1      | 1          | 1      | 0 | 0 | 0 | 0.9746 Ref |
| MK719712 | Unassigned | Unassigned | Unassigned | 1462_0 | Clustered | 110 VC_1462_0 | 110 | 1      | 1          | 1      | 0 | 0 | 0 | 0.9746 Ref |
| MK719713 | Unassigned | Unassigned | Unassigned | 1462_0 | Clustered | 110 VC_1462_0 | 110 | 1      | 1          | 1      | 0 | 0 | 0 | 0.9746 Ref |
| MK719714 | Unassigned | Unassigned | Unassigned | 1462_0 | Clustered | 110 VC_1462_0 | 110 | 1      | 1          | 1      | 0 | 0 | 0 | 0.9746 Ref |
| MK719715 | Unassigned | Unassigned | Unassigned | 1462_0 | Clustered | 110 VC_1462_0 | 110 | 1      | 1          | 1      | 0 | 0 | 0 | 0.9746 Ref |
| MK719716 | Unassigned | Unassigned | Unassigned | 1462_0 | Clustered | 110 VC_1462_0 | 110 | 1      | 1          | 1      | 0 | 0 | 0 | 0.9746 Ref |
| MK719717 | Unassigned | Unassigned | Unassigned | 1462_0 | Clustered | 110 VC_1462_0 | 110 | 1      | 1          | 1      | 0 | 0 | 0 | 0.9746 Ref |
| MK719718 | Unassigned | Unassigned | Unassigned | 1462_0 | Clustered | 110 VC_1462_0 | 110 | 1      | 1          | 1      | 0 | 0 | 0 | 0.9746 Ref |
| MK719719 | Unassigned | Unassigned | Unassigned | 1462_0 | Clustered | 110 VC_1462_0 | 110 | 1      | 1          | 1      | 0 | 0 | 0 | 0.9746 Ref |



[illegible]



|          |            |            |            |        |           |              |     |        |            |        |   |   |   |        |       |
|----------|------------|------------|------------|--------|-----------|--------------|-----|--------|------------|--------|---|---|---|--------|-------|
| MK757445 | Unassigned | Unassigned | Unassigned | 571_7  | Clustered | 28 VC_571_7  | 28  | 0.1651 | 1          | 0.1651 | 0 | 0 | 0 | 0.8519 | Ref   |
| MK757446 | Unassigned | Unassigned | Unassigned | 588_0  | Clustered | 8 VC_588_0   | 8   | 0.5695 | 1          | 0.5695 | 0 | 0 | 0 |        | 1 Ref |
| MK757447 | Unassigned | Unassigned | Unassigned | 1296_0 | Clustered | 82 VC_1296_0 | 82  | 0.7938 | 1          | 0.7938 | 0 | 0 | 0 |        | 1 Ref |
| MK757448 | Unassigned | Unassigned | Unassigned | 1427_0 | Clustered | 6 VC_1427_0  | 6   | 1      | 1          | 1      | 0 | 0 | 0 |        | 1 Ref |
| MK757449 | Unassigned | Unassigned | Unassigned | 1424_0 | Clustered | 31 VC_1424_0 | 31  | 0.8834 | 1          | 0.8834 | 0 | 0 | 0 |        | 1 Ref |
| MK759854 | Unassigned | Unassigned | Unassigned | 475_0  | Clustered | 96 VC_475_0  | 96  | 0.9303 | 1          | 0.9303 | 0 | 0 | 0 | 0.9575 | Ref   |
| MK759883 | Unassigned | Unassigned | Unassigned | 654_1  | Clustered | 27 VC_654_1  | 27  | 0.2571 | 1          | 0.2571 | 0 | 0 | 0 | 0.9858 | Ref   |
| MK759884 | Unassigned | Unassigned | Unassigned | 339_0  | Clustered | 11 VC_339_0  | 11  | 0.4647 | 1          | 0.4647 | 0 | 0 | 0 |        | 1 Ref |
| MK759918 | Unassigned | Unassigned | Unassigned | 746_0  | Clustered | 2 VC_746_0   | 2   | 0.3667 | 0.95002548 | 0.3484 | 0 | 0 | 0 |        | 1 Ref |
| MK761195 | Unassigned | Unassigned | Unassigned | 654_0  | Clustered | 115 VC_654_0 | 115 | 0.7303 | 1          | 0.7303 | 0 | 0 | 0 | 0.8764 | Ref   |
| MK761196 | Unassigned | Unassigned | Unassigned | 654_0  | Clustered | 115 VC_654_0 | 115 | 0.7303 | 1          | 0.7303 | 0 | 0 | 0 | 0.8764 | Ref   |
| MK761197 | Unassigned | Unassigned | Unassigned | 654_0  | Clustered | 115 VC_654_0 | 115 | 0.7303 | 1          | 0.7303 | 0 | 0 | 0 | 0.8764 | Ref   |
| MK761198 | Unassigned | Unassigned | Unassigned | 654_0  | Clustered | 115 VC_654_0 | 115 | 0.7303 | 1          | 0.7303 | 0 | 0 | 0 | 0.8764 | Ref   |
| MK761199 | Unassigned | Unassigned | Unassigned | 654_0  | Clustered | 115 VC_654_0 | 115 | 0.7303 | 1          | 0.7303 | 0 | 0 | 0 | 0.8764 | Ref   |
| MK764384 | Unassigned | Unassigned | Unassigned | 98_0   | Clustered | 30 VC_98_0   | 30  | 0.7175 | 1          | 0.7175 | 0 | 0 | 0 |        | 1 Ref |
| MK764436 | Unassigned | Unassigned | Unassigned | 1080_0 | Clustered | 23 VC_1080_0 | 23  | 0.9603 | 1          | 0.9603 | 0 | 0 | 0 |        | 1 Ref |
| MK764437 | Unassigned | Unassigned | Unassigned | 1061_0 | Clustered | 8 VC_1061_0  | 8   | 0.8379 | 1          | 0.8379 | 0 | 0 | 0 |        | 1 Ref |
| MK764438 | Unassigned | Unassigned | Unassigned | 1080_0 | Clustered | 23 VC_1080_0 | 23  | 0.9603 | 1          | 0.9603 | 0 | 0 | 0 |        | 1 Ref |
| MK764439 | Unassigned | Unassigned | Unassigned | 1080_0 | Clustered | 23 VC_1080_0 | 23  | 0.9603 | 1          | 0.9603 | 0 | 0 | 0 |        | 1 Ref |
| MK764440 | Unassigned | Unassigned | Unassigned | 1061_0 | Clustered | 8 VC_1061_0  | 8   | 0.8379 | 1          | 0.8379 | 0 | 0 | 0 |        | 1 Ref |
| MK764441 | Unassigned | Unassigned | Unassigned | 1198_0 | Clustered | 24 VC_1198_0 | 24  | 1      | 1          | 1      | 0 | 0 | 0 |        | 1 Ref |
| MK764442 | Unassigned | Unassigned | Unassigned | 1059_0 | Clustered | 10 VC_1059_0 | 10  | 0.8794 | 1          | 0.8794 | 0 | 0 | 0 |        | 1 Ref |
| MK764443 | Unassigned | Unassigned | Unassigned | 1080_0 | Clustered | 23 VC_1080_0 | 23  | 0.9603 | 1          | 0.9603 | 0 | 0 | 0 |        | 1 Ref |
| MK764444 | Unassigned | Unassigned | Unassigned | 1080_0 | Clustered | 23 VC_1080_0 | 23  | 0.9603 | 1          | 0.9603 | 0 | 0 | 0 |        | 1 Ref |
| MK764445 | Unassigned | Unassigned | Unassigned | 1059_0 | Clustered | 10 VC_1059_0 | 10  | 0.8794 | 1          | 0.8794 | 0 | 0 | 0 |        | 1 Ref |
| MK764446 | Unassigned | Unassigned | Unassigned | 1080_0 | Clustered | 23 VC_1080_0 | 23  | 0.9603 | 1          | 0.9603 | 0 | 0 | 0 |        | 1 Ref |
| MK764447 | Unassigned | Unassigned | Unassigned | 1080_0 | Clustered | 23 VC_1080_0 | 23  | 0.9603 | 1          | 0.9603 | 0 | 0 | 0 |        | 1 Ref |
| MK764448 | Unassigned | Unassigned | Unassigned | 1059_0 | Clustered | 10 VC_1059_0 | 10  | 0.8794 | 1          | 0.8794 | 0 | 0 | 0 |        | 1 Ref |
| MK764449 | Unassigned | Unassigned | Unassigned | 1198_0 | Clustered | 24 VC_1198_0 | 24  | 1      | 1          | 1      | 0 | 0 | 0 |        | 1 Ref |
| MK764450 | Unassigned | Unassigned | Unassigned | 1061_0 | Clustered | 8 VC_1061_0  | 8   | 0.8379 | 1          | 0.8379 | 0 | 0 | 0 |        | 1 Ref |
| MK765551 | Unassigned | Unassigned | Unassigned | 1463_0 | Clustered | 2 VC_1463_0  | 2   | 1      | 1          | 1      | 0 | 0 | 0 |        | 1 Ref |
| MK765552 | Unassigned | Unassigned | Unassigned | 1344_0 | Clustered | 26 VC_1344_0 | 26  | 0.5437 | 1          | 0.5437 | 0 | 0 | 0 |        | 1 Ref |
| MK765553 | Unassigned | Unassigned | Unassigned | 1344_0 | Clustered | 26 VC_1344_0 | 26  | 0.5437 | 1          | 0.5437 | 0 | 0 | 0 |        | 1 Ref |
| MK765555 | Unassigned | Unassigned | Unassigned | 1389_0 | Clustered | 7 VC_1389_0  | 7   | 0.9155 | 0.99999981 | 0.9155 | 0 | 0 | 0 |        | 1 Ref |
| MK765556 | Unassigned | Unassigned | Unassigned | 1344_0 | Clustered | 26 VC_1344_0 | 26  | 0.5437 | 1          | 0.5437 | 0 | 0 | 0 |        | 1 Ref |
| MK765557 | Unassigned | Unassigned | Unassigned | 1267_0 | Clustered | 26 VC_1267_0 | 26  | 0.9597 | 0.99999998 | 0.9597 | 0 | 0 | 0 |        | 1 Ref |
| MK765558 | Unassigned | Unassigned | Unassigned | 1464_0 | Clustered | 9 VC_1464_0  | 9   | 0.5437 | 1          | 0.5437 | 0 | 0 | 0 |        | 1 Ref |
| MK765559 | Unassigned | Unassigned | Unassigned | 1161_0 | Clustered | 16 VC_1161_0 | 16  | 0.4834 | 0.99999958 | 0.4834 | 0 | 0 | 0 |        | 1 Ref |
| MK765560 | Unassigned | Unassigned | Unassigned | 1344_0 | Clustered | 26 VC_1344_0 | 26  | 0.5437 | 1          | 0.5437 | 0 | 0 | 0 |        | 1 Ref |
| MK765561 | Unassigned | Unassigned | Unassigned | 1299_0 | Clustered | 53 VC_1299_0 | 53  | 0.8666 | 1          | 0.8666 | 0 | 0 | 0 |        | 1 Ref |
| MK765562 | Unassigned | Unassigned | Unassigned | 1344_0 | Clustered | 26 VC_1344_0 | 26  | 0.5437 | 1          | 0.5437 | 0 | 0 | 0 |        | 1 Ref |
| MK765563 | Unassigned | Unassigned | Unassigned | 1299_0 | Clustered | 53 VC_1299_0 | 53  | 0.8666 | 1          | 0.8666 | 0 | 0 | 0 |        | 1 Ref |
| MK765564 | Unassigned | Unassigned | Unassigned | 1299_0 | Clustered | 53 VC_1299_0 | 53  | 0.8666 | 1          | 0.8666 | 0 | 0 | 0 |        | 1 Ref |
| MK765565 | Unassigned | Unassigned | Unassigned | 1344_0 | Clustered | 26 VC_1344_0 | 26  | 0.5437 | 1          | 0.5437 | 0 | 0 | 0 |        | 1 Ref |
| MK765567 | Unassigned | Unassigned | Unassigned | 1389_0 | Clustered | 7 VC_1389_0  | 7   | 0.9155 | 0.99999981 | 0.9155 | 0 | 0 | 0 |        | 1 Ref |
| MK765568 | Unassigned | Unassigned | Unassigned | 1299_0 | Clustered | 53 VC_1299_0 | 53  | 0.8666 | 1          | 0.8666 | 0 | 0 | 0 |        | 1 Ref |
| MK765569 | Unassigned | Unassigned | Unassigned | 1299_0 | Clustered | 53 VC_1299_0 | 53  | 0.8666 | 1          | 0.8666 | 0 | 0 | 0 |        | 1 Ref |
| MK765571 | Unassigned | Unassigned | Unassigned | 1346_0 | Clustered | 25 VC_1346_0 | 25  | 1      | 1          | 1      | 0 | 0 | 0 |        | 1 Ref |
| MK765572 | Unassigned | Unassigned | Unassigned | 1339_0 | Clustered | 2 VC_1339_0  | 2   | 0.0658 | 0.94989008 | 0.0625 | 0 | 0 | 0 |        | 1 Ref |
| MK765573 | Unassigned | Unassigned | Unassigned | 1465_0 | Clustered | 2 VC_1465_0  | 2   | 1      | 1          | 1      | 0 | 0 | 0 |        | 1 Ref |
| MK765574 | Unassigned | Unassigned | Unassigned | 1346_0 | Clustered | 25 VC_1346_0 | 25  | 1      | 1          | 1      | 0 | 0 | 0 |        | 1 Ref |
| MK765575 | Unassigned | Unassigned | Unassigned | 1466_0 | Clustered | 2 VC_1466_0  | 2   | 1      | 1          | 1      | 0 | 0 | 0 |        | 1 Ref |
| MK765576 | Unassigned | Unassigned | Unassigned | 1346_0 | Clustered | 25 VC_1346_0 | 25  | 1      | 1          | 1      | 0 | 0 | 0 |        | 1 Ref |
| MK765577 | Unassigned | Unassigned | Unassigned | 1346_0 | Clustered | 25 VC_1346_0 | 25  | 1      | 1          | 1      | 0 | 0 | 0 |        | 1 Ref |
| MK765578 | Unassigned | Unassigned | Unassigned | 1466_0 | Clustered | 2 VC_1466_0  | 2   | 1      | 1          | 1      | 0 | 0 | 0 |        | 1 Ref |
| MK765579 | Unassigned | Unassigned | Unassigned | 1104_0 | Clustered | 44 VC_1104_0 | 44  | 0.9574 | 0.72818579 | 0.6972 | 0 | 0 | 0 |        | 1 Ref |
| MK765580 | Unassigned | Unassigned | Unassigned | 1346_0 | Clustered | 25 VC_1346_0 | 25  | 1      | 1          | 1      | 0 | 0 | 0 |        | 1 Ref |
| MK765581 | Unassigned | Unassigned | Unassigned | 1464_0 | Clustered | 9 VC_1464_0  | 9   | 1      | 0          | 0      | 0 | 0 | 0 |        | 1 Ref |
| MK765582 | Unassigned | Unassigned | Unassigned | 1104_0 | Clustered | 44 VC_1104_0 | 44  | 0.9574 | 0.72818579 | 0.6972 | 0 | 0 | 0 |        | 1 Ref |
| MK765583 | Unassigned | Unassigned | Unassigned | 1369_0 | Clustered | 10 VC_1369_0 | 10  | 0.6223 | 0.95845085 | 0.5964 | 0 | 0 | 0 |        | 1 Ref |
| MK765587 | Unassigned | Unassigned | Unassigned | 1467_0 | Clustered | 14 VC_1467_0 | 14  | 0.167  | 0.51390354 | 0.0858 | 0 | 0 | 0 |        | 1 Ref |
| MK765588 | Unassigned | Unassigned | Unassigned | 1467_0 | Clustered | 14 VC_1467_0 | 14  | 0.167  | 0.51390354 | 0.0858 | 0 | 0 | 0 |        | 1 Ref |
| MK765589 | Unassigned | Unassigned | Unassigned | 1468_0 | Clustered | 28 VC_1468_0 | 28  | 0.7511 | 1          | 0.7511 | 0 | 0 | 0 |        | 1 Ref |
| MK765590 | Unassigned | Unassigned | Unassigned | 1335_0 | Clustered | 13 VC_1335_0 | 13  | 0.7519 | 1          | 0.7519 | 0 | 0 | 0 |        | 1 Ref |
| MK765591 | Unassigned | Unassigned | Unassigned | 1344_0 | Clustered | 26 VC_1344_0 | 26  | 0.5437 | 1          | 0.5437 | 0 | 0 | 0 |        | 1 Ref |
| MK765592 | Unassigned | Unassigned | Unassigned | 1344_0 | Clustered | 26 VC_1344_0 | 26  | 0.5437 | 1          | 0.5437 | 0 | 0 | 0 |        | 1 Ref |
| MK765593 | Unassigned | Unassigned | Unassigned | 1344_0 | Clustered | 26 VC_1344_0 | 26  | 0.5437 | 1          | 0.5437 | 0 | 0 | 0 |        | 1 Ref |
| MK765594 | Unassigned | Unassigned | Unassigned | 1299_0 | Clustered | 53 VC_1299_0 | 53  | 0.8666 | 1          | 0.8666 | 0 | 0 | 0 |        | 1 Ref |
| MK765596 | Unassigned | Unassigned | Unassigned | 1344_0 | Clustered | 26 VC_1344_0 | 26  | 0.5437 | 1          | 0.5437 | 0 | 0 | 0 |        | 1 Ref |
| MK765598 | Unassigned | Unassigned | Unassigned | 1467_0 | Clustered | 14 VC_1467_0 | 14  | 0.167  | 0.51390354 | 0.0858 | 0 | 0 | 0 |        | 1 Ref |
| MK765599 | Unassigned | Unassigned | Unassigned | 1467_0 | Clustered | 14 VC_1467_0 | 14  | 0.167  | 0.51390354 | 0.0858 | 0 | 0 | 0 |        | 1 Ref |
| MK765600 | Unassigned | Unassigned | Unassigned | 1389_0 | Clustered | 7 VC_1389_0  | 7   | 0.9155 | 0.99999981 | 0.9155 | 0 | 0 | 0 |        | 1 Ref |
| MK765601 | Unassigned | Unassigned | Unassigned | 1364_0 | Clustered | 6 VC_1364_0  | 6   | 0.9472 | 0.54366909 | 0.515  | 0 | 0 | 0 |        | 1 Ref |
| MK765602 | Unassigned | Unassigned | Unassigned | 1181_0 | Clustered | 4 VC_1181_0  | 4   | 0.1325 | 0.65559538 | 0.0869 | 0 | 0 | 0 |        | 1 Ref |
| MK765603 | Unassigned | Unassigned | Unassigned | 1161_0 | Clustered | 16 VC_1161_0 | 16  | 0.4834 | 0.99999958 | 0.4834 | 0 | 0 | 0 |        | 1 Ref |
| MK765604 | Unassigned | Unassigned | Unassigned | 1464_0 | Clustered | 9 VC_1464_0  | 9   | 1      | 0          | 0      | 0 | 0 | 0 |        | 1 Ref |
| MK765605 | Unassigned | Unassigned | Unassigned | 1471_0 | Clustered | 2 VC_1471_0  | 2   | 1      | 1          | 1      | 0 | 0 | 0 |        | 1 Ref |
| MK765606 | Unassigned | Unassigned | Unassigned | 1344_0 | Clustered | 26 VC_1344_0 | 26  | 0.5437 | 1          | 0.5437 | 0 | 0 | 0 |        | 1 Ref |
| MK765607 | Unassigned | Unassigned | Unassigned | 1344_0 | Clustered | 26 VC_1344_0 | 26  | 0.5437 | 1          | 0.5437 | 0 | 0 | 0 |        | 1 Ref |
| MK765609 | Unassigned | Unassigned | Unassigned | 1344_0 | Clustered | 26 VC_1344_0 | 26  | 0.5437 | 1          | 0.5437 | 0 | 0 | 0 |        | 1 Ref |
| MK765610 | Unassigned | Unassigned | Unassigned | 1389_0 | Clustered | 7 VC_1389_0  | 7   | 0.9155 | 0.99999981 | 0.9155 | 0 | 0 | 0 |        | 1 Ref |



|          |            |            |            |        |                     |               |     |        |            |        |   |   |   |            |
|----------|------------|------------|------------|--------|---------------------|---------------|-----|--------|------------|--------|---|---|---|------------|
| MK765611 | Unassigned | Unassigned | Unassigned | 1344_0 | Clustered           | 26 VC_1344_0  | 26  | 0.5437 | 1          | 0.5437 | 0 | 0 | 0 | 1 Ref      |
| MK765612 | Unassigned | Unassigned | Unassigned | 1344_0 | Clustered           | 26 VC_1344_0  | 26  | 0.5437 | 1          | 0.5437 | 0 | 0 | 0 | 1 Ref      |
| MK765613 | Unassigned | Unassigned | Unassigned | 1344_0 | Clustered           | 26 VC_1344_0  | 26  | 0.5437 | 1          | 0.5437 | 0 | 0 | 0 | 1 Ref      |
| MK765615 | Unassigned | Unassigned | Unassigned | 1344_0 | Clustered           | 26 VC_1344_0  | 26  | 0.5437 | 1          | 0.5437 | 0 | 0 | 0 | 1 Ref      |
| MK765617 | Unassigned | Unassigned | Unassigned | 1389_0 | Clustered           | 7 VC_1389_0   | 7   | 0.9155 | 0.99999981 | 0.9155 | 0 | 0 | 0 | 1 Ref      |
| MK765620 | Unassigned | Unassigned | Unassigned | 1145_0 | Clustered           | 164 VC_1145_0 | 164 | 0.8868 | 1          | 0.8868 | 0 | 0 | 0 | 1 Ref      |
| MK765621 | Unassigned | Unassigned | Unassigned | 1161_0 | Clustered           | 16 VC_1161_0  | 16  | 0.4834 | 0.99999958 | 0.4834 | 0 | 0 | 0 | 1 Ref      |
| MK765622 | Unassigned | Unassigned | Unassigned | 1464_0 | Clustered           | 9 VC_1464_0   | 9   | 1      | 0          | 0      | 0 | 0 | 0 | 1 Ref      |
| MK765623 | Unassigned | Unassigned | Unassigned | 1467_0 | Clustered           | 14 VC_1467_0  | 14  | 0.167  | 0.51390354 | 0.0858 | 0 | 0 | 0 | 1 Ref      |
| MK765625 | Unassigned | Unassigned | Unassigned | 1467_0 | Clustered           | 14 VC_1467_0  | 14  | 0.167  | 0.51390354 | 0.0858 | 0 | 0 | 0 | 1 Ref      |
| MK765626 | Unassigned | Unassigned | Unassigned | 1469_0 | Clustered/Singleton | 1 VC_1469_0   | 1   | 0      | 1          | 0      | 0 | 0 | 0 | 1 Ref      |
| MK765628 | Unassigned | Unassigned | Unassigned | 1467_0 | Clustered           | 14 VC_1467_0  | 14  | 0.167  | 0.51390354 | 0.0858 | 0 | 0 | 0 | 1 Ref      |
| MK765630 | Unassigned | Unassigned | Unassigned | 1467_0 | Clustered           | 14 VC_1467_0  | 14  | 0.167  | 0.51390354 | 0.0858 | 0 | 0 | 0 | 1 Ref      |
| MK765631 | Unassigned | Unassigned | Unassigned | 1467_0 | Clustered           | 14 VC_1467_0  | 14  | 0.167  | 0.51390354 | 0.0858 | 0 | 0 | 0 | 1 Ref      |
| MK765633 | Unassigned | Unassigned | Unassigned | 1344_0 | Clustered           | 26 VC_1344_0  | 26  | 0.5437 | 1          | 0.5437 | 0 | 0 | 0 | 1 Ref      |
| MK765634 | Unassigned | Unassigned | Unassigned | 1467_0 | Clustered           | 14 VC_1467_0  | 14  | 0.167  | 0.51390354 | 0.0858 | 0 | 0 | 0 | 1 Ref      |
| MK765638 | Unassigned | Unassigned | Unassigned | 1299_0 | Clustered           | 53 VC_1299_0  | 53  | 0.8666 | 1          | 0.8666 | 0 | 0 | 0 | 1 Ref      |
| MK765639 | Unassigned | Unassigned | Unassigned | 1104_0 | Clustered           | 44 VC_1104_0  | 44  | 0.9574 | 0.72818579 | 0.6972 | 0 | 0 | 0 | 1 Ref      |
| MK765640 | Unassigned | Unassigned | Unassigned | 1464_0 | Clustered           | 9 VC_1464_0   | 9   | 1      | 0          | 0      | 0 | 0 | 0 | 1 Ref      |
| MK765641 | Unassigned | Unassigned | Unassigned | 1471_0 | Clustered           | 2 VC_1471_0   | 2   | 1      | 1          | 1      | 0 | 0 | 0 | 1 Ref      |
| MK765642 | Unassigned | Unassigned | Unassigned | 1104_0 | Clustered           | 44 VC_1104_0  | 44  | 0.9574 | 0.72818579 | 0.6972 | 0 | 0 | 0 | 1 Ref      |
| MK765643 | Unassigned | Unassigned | Unassigned | 1104_0 | Clustered           | 44 VC_1104_0  | 44  | 0.9574 | 0.72818579 | 0.6972 | 0 | 0 | 0 | 1 Ref      |
| MK765644 | Unassigned | Unassigned | Unassigned | 1104_0 | Clustered           | 44 VC_1104_0  | 44  | 0.9574 | 0.72818579 | 0.6972 | 0 | 0 | 0 | 1 Ref      |
| MK765645 | Unassigned | Unassigned | Unassigned | 1119_0 | Clustered           | 48 VC_1119_0  | 48  | 0.852  | 1          | 0.852  | 0 | 0 | 0 | 1 Ref      |
| MK765646 | Unassigned | Unassigned | Unassigned | 1104_0 | Clustered           | 44 VC_1104_0  | 44  | 0.9574 | 0.72818579 | 0.6972 | 0 | 0 | 0 | 1 Ref      |
| MK765648 | Unassigned | Unassigned | Unassigned | 1344_0 | Clustered           | 26 VC_1344_0  | 26  | 0.5437 | 1          | 0.5437 | 0 | 0 | 0 | 1 Ref      |
| MK765649 | Unassigned | Unassigned | Unassigned | 1341_0 | Clustered           | 4 VC_1341_0   | 4   | 1      | 1          | 1      | 0 | 0 | 0 | 1 Ref      |
| MK765650 | Unassigned | Unassigned | Unassigned | 1463_0 | Clustered           | 2 VC_1463_0   | 2   | 1      | 1          | 1      | 0 | 0 | 0 | 1 Ref      |
| MK765651 | Unassigned | Unassigned | Unassigned | 1344_0 | Clustered           | 26 VC_1344_0  | 26  | 0.5437 | 1          | 0.5437 | 0 | 0 | 0 | 1 Ref      |
| MK765653 | Unassigned | Unassigned | Unassigned | 1394_0 | Clustered           | 4 VC_1394_0   | 4   | 0.7326 | 0.99899459 | 0.7318 | 0 | 0 | 0 | 1 Ref      |
| MK765654 | Unassigned | Unassigned | Unassigned | 1464_0 | Clustered           | 9 VC_1464_0   | 9   | 1      | 0          | 0      | 0 | 0 | 0 | 1 Ref      |
| MK765655 | Unassigned | Unassigned | Unassigned | 1267_0 | Clustered           | 26 VC_1267_0  | 26  | 0.9597 | 0.99999998 | 0.9597 | 0 | 0 | 0 | 1 Ref      |
| MK765656 | Unassigned | Unassigned | Unassigned | 1464_0 | Clustered           | 9 VC_1464_0   | 9   | 1      | 0          | 0      | 0 | 0 | 0 | 1 Ref      |
| MK765657 | Unassigned | Unassigned | Unassigned | 1344_0 | Clustered           | 26 VC_1344_0  | 26  | 0.5437 | 1          | 0.5437 | 0 | 0 | 0 | 1 Ref      |
| MK765658 | Unassigned | Unassigned | Unassigned | 1344_0 | Clustered           | 26 VC_1344_0  | 26  | 0.5437 | 1          | 0.5437 | 0 | 0 | 0 | 1 Ref      |
| MK765659 | Unassigned | Unassigned | Unassigned | 1389_0 | Clustered           | 7 VC_1389_0   | 7   | 0.9155 | 0.99999981 | 0.9155 | 0 | 0 | 0 | 1 Ref      |
| MK765660 | Unassigned | Unassigned | Unassigned | 1344_0 | Clustered           | 26 VC_1344_0  | 26  | 0.5437 | 1          | 0.5437 | 0 | 0 | 0 | 1 Ref      |
| MK765661 | Unassigned | Unassigned | Unassigned | 1267_0 | Clustered           | 26 VC_1267_0  | 26  | 0.9597 | 0.99999998 | 0.9597 | 0 | 0 | 0 | 1 Ref      |
| MK765662 | Unassigned | Unassigned | Unassigned | 1465_0 | Clustered           | 2 VC_1465_0   | 2   | 1      | 1          | 1      | 0 | 0 | 0 | 1 Ref      |
| MK765663 | Unassigned | Unassigned | Unassigned | 1464_0 | Clustered           | 9 VC_1464_0   | 9   | 1      | 0          | 0      | 0 | 0 | 0 | 1 Ref      |
| MK765664 | Unassigned | Unassigned | Unassigned | 1389_0 | Clustered           | 7 VC_1389_0   | 7   | 0.9155 | 0.99999981 | 0.9155 | 0 | 0 | 0 | 1 Ref      |
| MK765666 | Unassigned | Unassigned | Unassigned | 1344_0 | Clustered           | 26 VC_1344_0  | 26  | 0.5437 | 1          | 0.5437 | 0 | 0 | 0 | 1 Ref      |
| MK765667 | Unassigned | Unassigned | Unassigned | 1267_0 | Clustered           | 26 VC_1267_0  | 26  | 0.9597 | 0.99999998 | 0.9597 | 0 | 0 | 0 | 1 Ref      |
| MK765668 | Unassigned | Unassigned | Unassigned | 1464_0 | Clustered           | 9 VC_1464_0   | 9   | 1      | 0          | 0      | 0 | 0 | 0 | 1 Ref      |
| MK765669 | Unassigned | Unassigned | Unassigned | 1161_0 | Clustered           | 16 VC_1161_0  | 16  | 0.4834 | 0.99999958 | 0.4834 | 0 | 0 | 0 | 1 Ref      |
| MK770409 | Unassigned | Unassigned | Unassigned | 654_0  | Clustered           | 115 VC_654_0  | 115 | 0.7303 | 1          | 0.7303 | 0 | 0 | 0 | 0.8764 Ref |
| MK770410 | Unassigned | Unassigned | Unassigned | 199_31 | Clustered           | 2 VC_199_31   | 2   | 0.0056 | 0.92139383 | 0.0052 | 0 | 0 | 0 | 1 Ref      |
| MK770411 | Unassigned | Unassigned | Unassigned | 440_0  | Clustered           | 33 VC_440_0   | 33  | 0.992  | 1          | 0.992  | 0 | 0 | 0 | 1 Ref      |
| MK770412 | Unassigned | Unassigned | Unassigned | 339_0  | Clustered           | 11 VC_339_0   | 11  | 0.4647 | 1          | 0.4647 | 0 | 0 | 0 | 1 Ref      |
| MK770413 | Unassigned | Unassigned | Unassigned | 440_0  | Clustered           | 33 VC_440_0   | 33  | 0.992  | 1          | 0.992  | 0 | 0 | 0 | 1 Ref      |
| MK770414 | Unassigned | Unassigned | Unassigned | 30_1   | Clustered           | 53 VC_30_1    | 53  | 0.7151 | 1          | 0.7151 | 0 | 0 | 0 | 0.9325 Ref |
| MK770415 | Unassigned | Unassigned | Unassigned | 30_1   | Clustered           | 53 VC_30_1    | 53  | 0.7151 | 1          | 0.7151 | 0 | 0 | 0 | 0.9325 Ref |
| MK773491 | Unassigned | Unassigned | Unassigned | 170_0  | Clustered           | 3 VC_170_0    | 3   | 0.0298 | 0.82983726 | 0.0247 | 0 | 0 | 0 | 1 Ref      |
| MK774614 | Unassigned | Unassigned | Unassigned | 456_4  | Clustered           | 2 VC_456_4    | 2   | 0.0252 | 0.90563532 | 0.0228 | 0 | 0 | 0 | 1 Ref      |
| MK778457 | Unassigned | Unassigned | Unassigned | 604_1  | Clustered           | 3 VC_604_1    | 3   | 0.0311 | 0.99857668 | 0.0311 | 0 | 0 | 0 | 1 Ref      |
| MK779875 | Unassigned | Unassigned | Unassigned | 824_0  | Clustered           | 3 VC_824_0    | 3   | 0.5034 | 0.9984288  | 0.5026 | 0 | 0 | 0 | 1 Ref      |
| MK792752 | Unassigned | Unassigned | Unassigned | 753_0  | Clustered           | 26 VC_753_0   | 26  | 0.9562 | 1          | 0.9562 | 0 | 0 | 0 | 1 Ref      |
| MK795384 | Unassigned | Unassigned | Unassigned | 136_0  | Clustered           | 3 VC_136_0    | 3   | 0.0934 | 0.99858535 | 0.0932 | 0 | 0 | 0 | 1 Ref      |
| MK795385 | Unassigned | Unassigned | Unassigned | 848_0  | Clustered           | 124 VC_848_0  | 124 | 0.9484 | 1          | 0.9484 | 0 | 0 | 0 | 1 Ref      |
| MK796244 | Unassigned | Unassigned | Unassigned | 1007_1 | Clustered           | 24 VC_1007_1  | 24  | 0.7364 | 1          | 0.7364 | 0 | 0 | 0 | 0.8877 Ref |
| MK796797 | Unassigned | Unassigned | Unassigned | 831_0  | Clustered           | 17 VC_831_0   | 17  | 0.9057 | 1          | 0.9057 | 0 | 0 | 0 | 1 Ref      |
| MK797984 | Unassigned | Unassigned | Unassigned | 171_0  | Clustered           | 4 VC_171_0    | 4   | 0.2204 | 0.99998328 | 0.2204 | 0 | 0 | 0 | 1 Ref      |
| MK798142 | Unassigned | Unassigned | Unassigned | 125_0  | Clustered           | 23 VC_125_0   | 23  | 0.8163 | 1          | 0.8163 | 0 | 0 | 0 | 1 Ref      |
| MK798143 | Unassigned | Unassigned | Unassigned | 65_0   | Clustered           | 3 VC_65_0     | 3   | 0.5621 | 0.99791205 | 0.5609 | 0 | 0 | 0 | 1 Ref      |
| MK798144 | Unassigned | Unassigned | Unassigned | 65_0   | Clustered           | 3 VC_65_0     | 3   | 0.5621 | 0.99791205 | 0.5609 | 0 | 0 | 0 | 1 Ref      |
| MK799650 | Unassigned | Unassigned | Unassigned | 78_0   | Clustered           | 20 VC_78_0    | 20  | 0.9639 | 1          | 0.9639 | 0 | 0 | 0 | 1 Ref      |
| MK799832 | Unassigned | Unassigned | Unassigned | 446_13 | Clustered/Singleton | 1 VC_446_13   | 1   | 0      | 1          | 0      | 0 | 0 | 0 | 1 Ref      |
| MK800154 | Unassigned | Unassigned | Unassigned | 110_0  | Clustered           | 33 VC_110_0   | 33  | 0.9488 | 1          | 0.9488 | 0 | 0 | 0 | 1 Ref      |
| MK801680 | Unassigned | Unassigned | Unassigned | 8_0    | Clustered           | 58 VC_8_0     | 58  | 0.8285 | 1          | 0.8285 | 0 | 0 | 0 | 0.9946 Ref |
| MK801681 | Unassigned | Unassigned | Unassigned | 8_0    | Clustered           | 58 VC_8_0     | 58  | 0.8285 | 1          | 0.8285 | 0 | 0 | 0 | 0.9946 Ref |
| MK801682 | Unassigned | Unassigned | Unassigned | 9_0    | Clustered           | 38 VC_9_0     | 38  | 0.4859 | 1          | 0.4859 | 0 | 0 | 0 | 1 Ref      |
| MK801683 | Unassigned | Unassigned | Unassigned | 9_0    | Clustered           | 38 VC_9_0     | 38  | 0.4859 | 1          | 0.4859 | 0 | 0 | 0 | 1 Ref      |
| MK801721 | Unassigned | Unassigned | Unassigned | 1217_0 | Clustered           | 41 VC_1217_0  | 41  | 0.9546 | 1          | 0.9546 | 0 | 0 | 0 | 0.9976 Ref |
| MK801722 | Unassigned | Unassigned | Unassigned | 1114_0 | Clustered           | 20 VC_1114_0  | 20  | 0.3238 | 1          | 0.3238 | 0 | 0 | 0 | 0.9842 Ref |
| MK801724 | Unassigned | Unassigned | Unassigned | 1217_0 | Clustered           | 41 VC_1217_0  | 41  | 0.9546 | 1          | 0.9546 | 0 | 0 | 0 | 0.9976 Ref |
| MK801725 | Unassigned | Unassigned | Unassigned | 528_0  | Clustered           | 12 VC_528_0   | 12  | 0.3923 | 1          | 0.3923 | 0 | 0 | 0 | 0.9697 Ref |
| MK801726 | Unassigned | Unassigned | Unassigned | 571_0  | Clustered           | 16 VC_571_0   | 16  | 0.091  | 1          | 0.091  | 0 | 0 | 0 | 0.6667 Ref |
| MK801727 | Unassigned | Unassigned | Unassigned | 543_0  | Clustered           | 25 VC_543_0   | 25  | 0.4584 | 1          | 0.4584 | 0 | 0 | 0 | 1 Ref      |
| MK801728 | Unassigned | Unassigned | Unassigned | 895_0  | Clustered           | 25 VC_895_0   | 25  | 0.5768 | 1          | 0.5768 | 0 | 0 | 0 | 1 Ref      |
| MK801730 | Unassigned | Unassigned | Unassigned | 1407_0 | Clustered           | 78 VC_1407_0  | 78  | 0.9731 | 1          | 0.9731 | 0 | 0 | 0 | 1 Ref      |
| MK801731 | Unassigned | Unassigned | Unassigned | 1406_0 | Clustered           | 21 VC_1406_0  | 21  | 0.9836 | 1          | 0.9836 | 0 | 0 | 0 | 1 Ref      |



|          |            |            |            |         |                     |              |     |        |            |        |   |   |   |            |
|----------|------------|------------|------------|---------|---------------------|--------------|-----|--------|------------|--------|---|---|---|------------|
| MK801732 | Unassigned | Unassigned | Unassigned | 1406_0  | Clustered           | 21 VC_1406_0 | 21  | 0.9836 | 1          | 0.9836 | 0 | 0 | 0 | 1 Ref      |
| MK801733 | Unassigned | Unassigned | Unassigned | 895_0   | Clustered           | 25 VC_895_0  | 25  | 0.5768 | 1          | 0.5768 | 0 | 0 | 0 | 1 Ref      |
| MK801734 | Unassigned | Unassigned | Unassigned | 1216_0  | Clustered           | 22 VC_1216_0 | 22  | 0.4546 | 1          | 0.4546 | 0 | 0 | 0 | 1 Ref      |
| MK801735 | Unassigned | Unassigned | Unassigned | 223_0   | Clustered           | 4 VC_223_0   | 4   | 0.0478 | 0.9999878  | 0.0478 | 0 | 0 | 0 | 1 Ref      |
| MK803322 | Unassigned | Unassigned | Unassigned | 173_0   | Clustered           | 3 VC_173_0   | 3   | 0.6871 | 0.99826575 | 0.6859 | 0 | 0 | 0 | 1 Ref      |
| MK804891 | Unassigned | Unassigned | Unassigned | 380_0   | Clustered           | 6 VC_380_0   | 6   | 0.51   | 1          | 0.51   | 0 | 0 | 0 | 1 Ref      |
| MK804892 | Unassigned | Unassigned | Unassigned | 380_0   | Clustered           | 6 VC_380_0   | 6   | 0.51   | 1          | 0.51   | 0 | 0 | 0 | 1 Ref      |
| MK804893 | Unassigned | Unassigned | Unassigned | 892_0   | Clustered           | 2 VC_892_0   | 2   | 0.0759 | 0.93631468 | 0.0711 | 0 | 0 | 0 | 1 Ref      |
| MK809530 | Unassigned | Unassigned | Unassigned | 199_32  | Clustered           | 12 VC_199_32 | 12  | 0.0676 | 1          | 0.0676 | 0 | 0 | 0 | 0.7576 Ref |
| MK813938 | Unassigned | Unassigned | Unassigned | 892_1   | Clustered/Singleton | 1 VC_892_1   | 1   | 0      | 1          | 0      | 0 | 0 | 0 | 1 Ref      |
| MK813939 | Unassigned | Unassigned | Unassigned | 892_0   | Clustered           | 2 VC_892_0   | 2   | 0.0759 | 0.93631468 | 0.0711 | 0 | 0 | 0 | 1 Ref      |
| MK813940 | Unassigned | Unassigned | Unassigned | 656_0   | Clustered           | 2 VC_656_0   | 2   | 0.2731 | 0.95526917 | 0.2609 | 0 | 0 | 0 | 1 Ref      |
| MK813941 | Unassigned | Unassigned | Unassigned | 892_2   | Clustered/Singleton | 1 VC_892_2   | 1   | 0      | 1          | 0      | 0 | 0 | 0 | 1 Ref      |
| MK814748 | Unassigned | Unassigned | Unassigned | 223_1   | Clustered/Singleton | 1 VC_223_1   | 1   | 0      | 1          | 0      | 0 | 0 | 0 | 1 Ref      |
| MK814749 | Unassigned | Unassigned | Unassigned | 1200_0  | Clustered           | 73 VC_1200_0 | 73  | 0.9825 | 1          | 0.9825 | 0 | 0 | 0 | 1 Ref      |
| MK814750 | Unassigned | Unassigned | Unassigned | 1226_0  | Clustered           | 5 VC_1226_0  | 5   | 0.6594 | 0.99999982 | 0.6594 | 0 | 0 | 0 | 1 Ref      |
| MK814751 | Unassigned | Unassigned | Unassigned | 526_0   | Clustered           | 32 VC_526_0  | 32  | 0.9037 | 1          | 0.9037 | 0 | 0 | 0 | 1 Ref      |
| MK814752 | Unassigned | Unassigned | Unassigned | 578_1   | Clustered           | 11 VC_578_1  | 11  | 0.4919 | 1          | 0.4919 | 0 | 0 | 0 | 0.7818 Ref |
| MK814753 | Unassigned | Unassigned | Unassigned | 1287_0  | Clustered           | 44 VC_1287_0 | 44  | 1      | 1          | 1      | 0 | 0 | 0 | 1 Ref      |
| MK814754 | Unassigned | Unassigned | Unassigned | 335_46  | Clustered/Singleton | 1 VC_335_46  | 1   | 0      | 1          | 0      | 0 | 0 | 0 | 1 Ref      |
| MK814755 | Unassigned | Unassigned | Unassigned | 543_0   | Clustered           | 25 VC_543_0  | 25  | 0.4584 | 1          | 0.4584 | 0 | 0 | 0 | 1 Ref      |
| MK814756 | Unassigned | Unassigned | Unassigned | 899_0   | Clustered           | 2 VC_899_0   | 2   | 0.0476 | 0.95725601 | 0.0456 | 0 | 0 | 0 | 1 Ref      |
| MK814757 | Unassigned | Unassigned | Unassigned | 1217_0  | Clustered           | 41 VC_1217_0 | 41  | 0.9546 | 1          | 0.9546 | 0 | 0 | 0 | 0.9976 Ref |
| MK814758 | Unassigned | Unassigned | Unassigned | 537_0   | Clustered           | 39 VC_537_0  | 39  | 0.8148 | 1          | 0.8148 | 0 | 0 | 0 | 1 Ref      |
| MK814759 | Unassigned | Unassigned | Unassigned | 1222_0  | Clustered           | 3 VC_1222_0  | 3   | 0.5104 | 0.99818726 | 0.5095 | 0 | 0 | 0 | 1 Ref      |
| MK814760 | Unassigned | Unassigned | Unassigned | 1141_0  | Clustered           | 4 VC_1141_0  | 4   | 0.5416 | 0.99996462 | 0.5416 | 0 | 0 | 0 | 1 Ref      |
| MK814761 | Unassigned | Unassigned | Unassigned | 1219_0  | Clustered           | 24 VC_1219_0 | 24  | 0.9519 | 1          | 0.9519 | 0 | 0 | 0 | 1 Ref      |
| MK814762 | Unassigned | Unassigned | Unassigned | 1203_0  | Clustered           | 28 VC_1203_0 | 28  | 0.4905 | 1          | 0.4905 | 0 | 0 | 0 | 1 Ref      |
| MK816297 | Unassigned | Unassigned | Unassigned | 820_0   | Clustered           | 5 VC_820_0   | 5   | 0.332  | 0.99999997 | 0.332  | 0 | 0 | 0 | 1 Ref      |
| MK817115 | Unassigned | Unassigned | Unassigned | 170_11  | Clustered           | 10 VC_170_11 | 10  | 0.1502 | 0.99999797 | 0.1502 | 0 | 0 | 0 | 0.9111 Ref |
| MK819239 | Unassigned | Unassigned | Unassigned | 302_0   | Clustered           | 2 VC_302_0   | 2   | 0.0332 | 0.94488015 | 0.0313 | 0 | 0 | 0 | 1 Ref      |
| MK820013 | Unassigned | Unassigned | Unassigned | 1067_0  | Clustered           | 20 VC_1067_0 | 20  | 0.7109 | 1          | 0.7109 | 0 | 0 | 0 | 1 Ref      |
| MK820638 | Unassigned | Unassigned | Unassigned | 335_23  | Clustered           | 17 VC_335_23 | 17  | 0.0714 | 1          | 0.0714 | 0 | 0 | 0 | 0.6397 Ref |
| MK820639 | Unassigned | Unassigned | Unassigned | 537_0   | Clustered           | 39 VC_537_0  | 39  | 0.8148 | 1          | 0.8148 | 0 | 0 | 0 | 1 Ref      |
| MK820640 | Unassigned | Unassigned | Unassigned | 985_0   | Clustered           | 38 VC_985_0  | 38  | 0.9334 | 1          | 0.9334 | 0 | 0 | 0 | 1 Ref      |
| MK820641 | Unassigned | Unassigned | Unassigned | 701_0   | Clustered           | 16 VC_701_0  | 16  | 0.2957 | 1          | 0.2957 | 0 | 0 | 0 | 0.9167 Ref |
| MK820642 | Unassigned | Unassigned | Unassigned | 543_0   | Clustered           | 25 VC_543_0  | 25  | 0.4584 | 1          | 0.4584 | 0 | 0 | 0 | 1 Ref      |
| MK837009 | Unassigned | Unassigned | Unassigned | 80_5    | Clustered           | 2 VC_80_5    | 2   | 0.0046 | 0.92781966 | 0.0043 | 0 | 0 | 0 | 1 Ref      |
| MK837010 | Unassigned | Unassigned | Unassigned | 80_6    | Clustered           | 11 VC_80_6   | 11  | 0.0527 | 1          | 0.0527 | 0 | 0 | 0 | 0.7455 Ref |
| MK837011 | Unassigned | Unassigned | Unassigned | 486_0   | Clustered           | 47 VC_486_0  | 47  | 0.9022 | 1          | 0.9022 | 0 | 0 | 0 | 1 Ref      |
| MK837012 | Unassigned | Unassigned | Unassigned | 486_0   | Clustered           | 47 VC_486_0  | 47  | 0.9022 | 1          | 0.9022 | 0 | 0 | 0 | 1 Ref      |
| MK838107 | Unassigned | Unassigned | Unassigned | 907_0   | Clustered           | 32 VC_907_0  | 32  | 0.9964 | 1          | 0.9964 | 0 | 0 | 0 | 1 Ref      |
| MK838108 | Unassigned | Unassigned | Unassigned | 907_0   | Clustered           | 32 VC_907_0  | 32  | 0.9964 | 1          | 0.9964 | 0 | 0 | 0 | 1 Ref      |
| MK838109 | Unassigned | Unassigned | Unassigned | 907_0   | Clustered           | 32 VC_907_0  | 32  | 0.9964 | 1          | 0.9964 | 0 | 0 | 0 | 1 Ref      |
| MK838110 | Unassigned | Unassigned | Unassigned | 907_0   | Clustered           | 32 VC_907_0  | 32  | 0.9964 | 1          | 0.9964 | 0 | 0 | 0 | 1 Ref      |
| MK838111 | Unassigned | Unassigned | Unassigned | 907_0   | Clustered           | 32 VC_907_0  | 32  | 0.9964 | 1          | 0.9964 | 0 | 0 | 0 | 1 Ref      |
| MK838113 | Unassigned | Unassigned | Unassigned | 617_0   | Clustered           | 6 VC_617_0   | 6   | 0.1792 | 1          | 0.1792 | 0 | 0 | 0 | 1 Ref      |
| MK838116 | Unassigned | Unassigned | Unassigned | 456_0   | Clustered           | 4 VC_456_0   | 4   | 0.0832 | 0.99994226 | 0.0832 | 0 | 0 | 0 | 1 Ref      |
| MK863032 | Unassigned | Unassigned | Unassigned | 801_3   | Clustered           | 7 VC_801_3   | 7   | 0.0764 | 1          | 0.0764 | 0 | 0 | 0 | 0.7143 Ref |
| MK864263 | Unassigned | Unassigned | Unassigned | 1217_0  | Clustered           | 41 VC_1217_0 | 41  | 0.9546 | 1          | 0.9546 | 0 | 0 | 0 | 0.9976 Ref |
| MK864264 | Unassigned | Unassigned | Unassigned | 1219_0  | Clustered           | 24 VC_1219_0 | 24  | 0.9519 | 1          | 0.9519 | 0 | 0 | 0 | 1 Ref      |
| MK864265 | Unassigned | Unassigned | Unassigned | 1219_0  | Clustered           | 24 VC_1219_0 | 24  | 0.9519 | 1          | 0.9519 | 0 | 0 | 0 | 1 Ref      |
| MK864266 | Unassigned | Unassigned | Unassigned | 1219_0  | Clustered           | 24 VC_1219_0 | 24  | 0.9519 | 1          | 0.9519 | 0 | 0 | 0 | 1 Ref      |
| MK864267 | Unassigned | Unassigned | Unassigned | 1219_0  | Clustered           | 24 VC_1219_0 | 24  | 0.9519 | 1          | 0.9519 | 0 | 0 | 0 | 1 Ref      |
| MK867354 | Unassigned | Unassigned | Unassigned | 446_5   | Clustered/Singleton | 1 VC_446_5   | 1   | 0      | 1          | 0      | 0 | 0 | 0 | 1 Ref      |
| MK867835 | Unassigned | Unassigned | Unassigned | 199_27  | Clustered/Singleton | 1 VC_199_27  | 1   | 0      | 1          | 0      | 0 | 0 | 0 | 1 Ref      |
| MK875791 | Unassigned | Unassigned | Unassigned | 952_0   | Clustered           | 39 VC_952_0  | 39  | 0.9064 | 1          | 0.9064 | 0 | 0 | 0 | 1 Ref      |
| MK875793 | Unassigned | Unassigned | Unassigned | 543_0   | Clustered           | 25 VC_543_0  | 25  | 0.4584 | 1          | 0.4584 | 0 | 0 | 0 | 1 Ref      |
| MK875795 | Unassigned | Unassigned | Unassigned | 952_0   | Clustered           | 39 VC_952_0  | 39  | 0.9064 | 1          | 0.9064 | 0 | 0 | 0 | 1 Ref      |
| MK875796 | Unassigned | Unassigned | Unassigned | 543_0   | Clustered           | 25 VC_543_0  | 25  | 0.4584 | 1          | 0.4584 | 0 | 0 | 0 | 1 Ref      |
| MK875797 | Unassigned | Unassigned | Unassigned | 1216_0  | Clustered           | 22 VC_1216_0 | 22  | 0.4546 | 1          | 0.4546 | 0 | 0 | 0 | 1 Ref      |
| MK875798 | Unassigned | Unassigned | Unassigned | 1415_0  | Clustered           | 31 VC_1415_0 | 31  | 0.8456 | 1          | 0.8456 | 0 | 0 | 0 | 1 Ref      |
| MK875799 | Unassigned | Unassigned | Unassigned | 535_0   | Clustered           | 18 VC_535_0  | 18  | 0.1595 | 1          | 0.1595 | 0 | 0 | 0 | 1 Ref      |
| MK875800 | Unassigned | Unassigned | Unassigned | 532_0   | Clustered           | 75 VC_532_0  | 75  | 0.9393 | 1          | 0.9393 | 0 | 0 | 0 | 1 Ref      |
| MK878895 | Unassigned | Unassigned | Unassigned | 535_1   | Clustered           | 108 VC_535_1 | 108 | 0.8479 | 1          | 0.8479 | 0 | 0 | 0 | 0.9955 Ref |
| MK878896 | Unassigned | Unassigned | Unassigned | 1217_0  | Clustered           | 41 VC_1217_0 | 41  | 0.9546 | 1          | 0.9546 | 0 | 0 | 0 | 0.9976 Ref |
| MK878897 | Unassigned | Unassigned | Unassigned | 579_38  | Clustered           | 2 VC_579_38  | 2   | 0.0032 | 0.6354382  | 0.002  | 0 | 0 | 0 | 1 Ref      |
| MK878898 | Unassigned | Unassigned | Unassigned | 543_0   | Clustered           | 25 VC_543_0  | 25  | 0.4584 | 1          | 0.4584 | 0 | 0 | 0 | 1 Ref      |
| MK878899 | Unassigned | Unassigned | Unassigned | 1407_0  | Clustered           | 78 VC_1407_0 | 78  | 0.9731 | 1          | 0.9731 | 0 | 0 | 0 | 1 Ref      |
| MK878900 | Unassigned | Unassigned | Unassigned | 918_0   | Clustered           | 16 VC_918_0  | 16  | 0.2945 | 1          | 0.2945 | 0 | 0 | 0 | 1 Ref      |
| MK878901 | Unassigned | Unassigned | Unassigned | 1218_0  | Clustered           | 14 VC_1218_0 | 14  | 0.7811 | 1          | 0.7811 | 0 | 0 | 0 | 0.989 Ref  |
| MK878903 | Unassigned | Unassigned | Unassigned | 893_1   | Clustered           | 20 VC_893_1  | 20  | 0.4792 | 1          | 0.4792 | 0 | 0 | 0 | 1 Ref      |
| MK878904 | Unassigned | Unassigned | Unassigned | 1424_0  | Clustered           | 31 VC_1424_0 | 31  | 0.8834 | 1          | 0.8834 | 0 | 0 | 0 | 1 Ref      |
| MK878905 | Unassigned | Unassigned | Unassigned | 535_1   | Clustered           | 108 VC_535_1 | 108 | 0.8479 | 1          | 0.8479 | 0 | 0 | 0 | 0.9955 Ref |
| MK880124 | Unassigned | Unassigned | Unassigned | 1249_0  | Clustered           | 8 VC_1249_0  | 8   | 0.191  | 1          | 0.191  | 0 | 0 | 0 | 1 Ref      |
| MK883717 | Unassigned | Unassigned | Unassigned | 794_4   | Clustered           | 4 VC_794_4   | 4   | 0.0181 | 0.73018303 | 0.0132 | 0 | 0 | 0 | 1 Ref      |
| MK883718 | Unassigned | Unassigned | Unassigned | 794_4   | Clustered           | 4 VC_794_4   | 4   | 0.0181 | 0.73018303 | 0.0132 | 0 | 0 | 0 | 1 Ref      |
| MK886800 | Unassigned | Unassigned | Unassigned | 290_164 | Clustered           | 2 VC_290_164 | 2   | 0.003  | 0.93435121 | 0.0028 | 0 | 0 | 0 | 1 Ref      |
| MK893987 | Unassigned | Unassigned | Unassigned | 685_2   | Clustered/Singleton | 1 VC_685_2   | 1   | 0      | 1          | 0      | 0 | 0 | 0 | 1 Ref      |
| MK894432 | Unassigned | Unassigned | Unassigned | 1203_0  | Clustered           | 28 VC_1203_0 | 28  | 0.4905 | 1          | 0.4905 | 0 | 0 | 0 | 1 Ref      |
| MK894433 | Unassigned | Unassigned | Unassigned | 230_0   | Clustered           | 38 VC_230_0  | 38  | 0.9076 | 1          | 0.9076 | 0 | 0 | 0 | 1 Ref      |



|          |            |            |            |        |           |              |     |        |            |        |   |   |   |            |
|----------|------------|------------|------------|--------|-----------|--------------|-----|--------|------------|--------|---|---|---|------------|
| MK894434 | Unassigned | Unassigned | Unassigned | 1407_0 | Clustered | 78 VC_1407_0 | 78  | 0.9731 | 1          | 0.9731 | 0 | 0 | 0 | 1 Ref      |
| MK894435 | Unassigned | Unassigned | Unassigned | 1424_0 | Clustered | 31 VC_1424_0 | 31  | 0.8834 | 1          | 0.8834 | 0 | 0 | 0 | 1 Ref      |
| MK894436 | Unassigned | Unassigned | Unassigned | 1141_0 | Clustered | 4 VC_1141_0  | 4   | 0.5416 | 0.99996462 | 0.5416 | 0 | 0 | 0 | 1 Ref      |
| MK894438 | Unassigned | Unassigned | Unassigned | 1424_0 | Clustered | 31 VC_1424_0 | 31  | 0.8834 | 1          | 0.8834 | 0 | 0 | 0 | 1 Ref      |
| MK895508 | Unassigned | Unassigned | Unassigned | 1007_1 | Clustered | 24 VC_1007_1 | 24  | 0.7364 | 1          | 0.7364 | 0 | 0 | 0 | 0.8877 Ref |
| MK903033 | Unassigned | Unassigned | Unassigned | 98_0   | Clustered | 30 VC_98_0   | 30  | 0.7175 | 1          | 0.7175 | 0 | 0 | 0 | 1 Ref      |
| MK903277 | Unassigned | Unassigned | Unassigned | 465_0  | Clustered | 80 VC_465_0  | 80  | 0.9988 | 1          | 0.9988 | 0 | 0 | 0 | 1 Ref      |
| MK903278 | Unassigned | Unassigned | Unassigned | 75_0   | Clustered | 15 VC_75_0   | 15  | 0.518  | 1          | 0.518  | 0 | 0 | 0 | 1 Ref      |
| MK903279 | Unassigned | Unassigned | Unassigned | 465_0  | Clustered | 80 VC_465_0  | 80  | 0.9988 | 1          | 0.9988 | 0 | 0 | 0 | 1 Ref      |
| MK903281 | Unassigned | Unassigned | Unassigned | 465_0  | Clustered | 80 VC_465_0  | 80  | 0.9988 | 1          | 0.9988 | 0 | 0 | 0 | 1 Ref      |
| MK903282 | Unassigned | Unassigned | Unassigned | 636_0  | Clustered | 13 VC_636_0  | 13  | 0.6223 | 1          | 0.6223 | 0 | 0 | 0 | 1 Ref      |
| MK903728 | Unassigned | Unassigned | Unassigned | 848_0  | Clustered | 124 VC_848_0 | 124 | 0.9484 | 1          | 0.9484 | 0 | 0 | 0 | 1 Ref      |
| MK907226 | Unassigned | Unassigned | Unassigned | 470_0  | Clustered | 62 VC_470_0  | 62  | 0.902  | 1          | 0.902  | 0 | 0 | 0 | 1 Ref      |
| MK907227 | Unassigned | Unassigned | Unassigned | 470_0  | Clustered | 62 VC_470_0  | 62  | 0.902  | 1          | 0.902  | 0 | 0 | 0 | 1 Ref      |
| MK907228 | Unassigned | Unassigned | Unassigned | 470_0  | Clustered | 62 VC_470_0  | 62  | 0.902  | 1          | 0.902  | 0 | 0 | 0 | 1 Ref      |
| MK907229 | Unassigned | Unassigned | Unassigned | 470_0  | Clustered | 62 VC_470_0  | 62  | 0.902  | 1          | 0.902  | 0 | 0 | 0 | 1 Ref      |
| MK907230 | Unassigned | Unassigned | Unassigned | 470_0  | Clustered | 62 VC_470_0  | 62  | 0.902  | 1          | 0.902  | 0 | 0 | 0 | 1 Ref      |
| MK907231 | Unassigned | Unassigned | Unassigned | 470_0  | Clustered | 62 VC_470_0  | 62  | 0.902  | 1          | 0.902  | 0 | 0 | 0 | 1 Ref      |
| MK907232 | Unassigned | Unassigned | Unassigned | 470_0  | Clustered | 62 VC_470_0  | 62  | 0.902  | 1          | 0.902  | 0 | 0 | 0 | 1 Ref      |
| MK907233 | Unassigned | Unassigned | Unassigned | 470_0  | Clustered | 62 VC_470_0  | 62  | 0.902  | 1          | 0.902  | 0 | 0 | 0 | 1 Ref      |
| MK907234 | Unassigned | Unassigned | Unassigned | 470_0  | Clustered | 62 VC_470_0  | 62  | 0.902  | 1          | 0.902  | 0 | 0 | 0 | 1 Ref      |
| MK907235 | Unassigned | Unassigned | Unassigned | 470_0  | Clustered | 62 VC_470_0  | 62  | 0.902  | 1          | 0.902  | 0 | 0 | 0 | 1 Ref      |
| MK907236 | Unassigned | Unassigned | Unassigned | 235_0  | Clustered | 60 VC_235_0  | 60  | 0.9413 | 1          | 0.9413 | 0 | 0 | 0 | 1 Ref      |
| MK907237 | Unassigned | Unassigned | Unassigned | 235_0  | Clustered | 60 VC_235_0  | 60  | 0.9413 | 1          | 0.9413 | 0 | 0 | 0 | 1 Ref      |
| MK907238 | Unassigned | Unassigned | Unassigned | 235_0  | Clustered | 60 VC_235_0  | 60  | 0.9413 | 1          | 0.9413 | 0 | 0 | 0 | 1 Ref      |
| MK907239 | Unassigned | Unassigned | Unassigned | 235_0  | Clustered | 60 VC_235_0  | 60  | 0.9413 | 1          | 0.9413 | 0 | 0 | 0 | 1 Ref      |
| MK907240 | Unassigned | Unassigned | Unassigned | 470_0  | Clustered | 62 VC_470_0  | 62  | 0.902  | 1          | 0.902  | 0 | 0 | 0 | 1 Ref      |
| MK907241 | Unassigned | Unassigned | Unassigned | 470_0  | Clustered | 62 VC_470_0  | 62  | 0.902  | 1          | 0.902  | 0 | 0 | 0 | 1 Ref      |
| MK907242 | Unassigned | Unassigned | Unassigned | 470_0  | Clustered | 62 VC_470_0  | 62  | 0.902  | 1          | 0.902  | 0 | 0 | 0 | 1 Ref      |
| MK907243 | Unassigned | Unassigned | Unassigned | 470_0  | Clustered | 62 VC_470_0  | 62  | 0.902  | 1          | 0.902  | 0 | 0 | 0 | 1 Ref      |
| MK907244 | Unassigned | Unassigned | Unassigned | 470_0  | Clustered | 62 VC_470_0  | 62  | 0.902  | 1          | 0.902  | 0 | 0 | 0 | 1 Ref      |
| MK907245 | Unassigned | Unassigned | Unassigned | 470_0  | Clustered | 62 VC_470_0  | 62  | 0.902  | 1          | 0.902  | 0 | 0 | 0 | 1 Ref      |
| MK907246 | Unassigned | Unassigned | Unassigned | 470_0  | Clustered | 62 VC_470_0  | 62  | 0.902  | 1          | 0.902  | 0 | 0 | 0 | 1 Ref      |
| MK907247 | Unassigned | Unassigned | Unassigned | 470_0  | Clustered | 62 VC_470_0  | 62  | 0.902  | 1          | 0.902  | 0 | 0 | 0 | 1 Ref      |
| MK907248 | Unassigned | Unassigned | Unassigned | 470_0  | Clustered | 62 VC_470_0  | 62  | 0.902  | 1          | 0.902  | 0 | 0 | 0 | 1 Ref      |
| MK907249 | Unassigned | Unassigned | Unassigned | 470_0  | Clustered | 62 VC_470_0  | 62  | 0.902  | 1          | 0.902  | 0 | 0 | 0 | 1 Ref      |
| MK907250 | Unassigned | Unassigned | Unassigned | 470_0  | Clustered | 62 VC_470_0  | 62  | 0.902  | 1          | 0.902  | 0 | 0 | 0 | 1 Ref      |
| MK907251 | Unassigned | Unassigned | Unassigned | 470_0  | Clustered | 62 VC_470_0  | 62  | 0.902  | 1          | 0.902  | 0 | 0 | 0 | 1 Ref      |
| MK907252 | Unassigned | Unassigned | Unassigned | 470_0  | Clustered | 62 VC_470_0  | 62  | 0.902  | 1          | 0.902  | 0 | 0 | 0 | 1 Ref      |
| MK907253 | Unassigned | Unassigned | Unassigned | 470_0  | Clustered | 62 VC_470_0  | 62  | 0.902  | 1          | 0.902  | 0 | 0 | 0 | 1 Ref      |
| MK907254 | Unassigned | Unassigned | Unassigned | 470_0  | Clustered | 62 VC_470_0  | 62  | 0.902  | 1          | 0.902  | 0 | 0 | 0 | 1 Ref      |
| MK907255 | Unassigned | Unassigned | Unassigned | 470_0  | Clustered | 62 VC_470_0  | 62  | 0.902  | 1          | 0.902  | 0 | 0 | 0 | 1 Ref      |
| MK907256 | Unassigned | Unassigned | Unassigned | 470_0  | Clustered | 62 VC_470_0  | 62  | 0.902  | 1          | 0.902  | 0 | 0 | 0 | 1 Ref      |
| MK907257 | Unassigned | Unassigned | Unassigned | 470_0  | Clustered | 62 VC_470_0  | 62  | 0.902  | 1          | 0.902  | 0 | 0 | 0 | 1 Ref      |
| MK907258 | Unassigned | Unassigned | Unassigned | 470_0  | Clustered | 62 VC_470_0  | 62  | 0.902  | 1          | 0.902  | 0 | 0 | 0 | 1 Ref      |
| MK907259 | Unassigned | Unassigned | Unassigned | 470_0  | Clustered | 62 VC_470_0  | 62  | 0.902  | 1          | 0.902  | 0 | 0 | 0 | 1 Ref      |
| MK907260 | Unassigned | Unassigned | Unassigned | 470_0  | Clustered | 62 VC_470_0  | 62  | 0.902  | 1          | 0.902  | 0 | 0 | 0 | 1 Ref      |
| MK907261 | Unassigned | Unassigned | Unassigned | 470_0  | Clustered | 62 VC_470_0  | 62  | 0.902  | 1          | 0.902  | 0 | 0 | 0 | 1 Ref      |
| MK907262 | Unassigned | Unassigned | Unassigned | 470_0  | Clustered | 62 VC_470_0  | 62  | 0.902  | 1          | 0.902  | 0 | 0 | 0 | 1 Ref      |
| MK907263 | Unassigned | Unassigned | Unassigned | 470_0  | Clustered | 62 VC_470_0  | 62  | 0.902  | 1          | 0.902  | 0 | 0 | 0 | 1 Ref      |
| MK907264 | Unassigned | Unassigned | Unassigned | 470_0  | Clustered | 62 VC_470_0  | 62  | 0.902  | 1          | 0.902  | 0 | 0 | 0 | 1 Ref      |
| MK907265 | Unassigned | Unassigned | Unassigned | 470_0  | Clustered | 62 VC_470_0  | 62  | 0.902  | 1          | 0.902  | 0 | 0 | 0 | 1 Ref      |
| MK907266 | Unassigned | Unassigned | Unassigned | 470_0  | Clustered | 62 VC_470_0  | 62  | 0.902  | 1          | 0.902  | 0 | 0 | 0 | 1 Ref      |
| MK907267 | Unassigned | Unassigned | Unassigned | 199_13 | Clustered | 5 VC_199_13  | 5   | 0.0231 | 0.99999881 | 0.0231 | 0 | 0 | 0 | 1 Ref      |
| MK907268 | Unassigned | Unassigned | Unassigned | 199_13 | Clustered | 5 VC_199_13  | 5   | 0.0231 | 0.99999881 | 0.0231 | 0 | 0 | 0 | 1 Ref      |
| MK907269 | Unassigned | Unassigned | Unassigned | 199_13 | Clustered | 5 VC_199_13  | 5   | 0.0231 | 0.99999881 | 0.0231 | 0 | 0 | 0 | 1 Ref      |
| MK907270 | Unassigned | Unassigned | Unassigned | 199_13 | Clustered | 5 VC_199_13  | 5   | 0.0231 | 0.99999881 | 0.0231 | 0 | 0 | 0 | 1 Ref      |
| MK907271 | Unassigned | Unassigned | Unassigned | 199_13 | Clustered | 5 VC_199_13  | 5   | 0.0231 | 0.99999881 | 0.0231 | 0 | 0 | 0 | 1 Ref      |
| MK907272 | Unassigned | Unassigned | Unassigned | 470_0  | Clustered | 62 VC_470_0  | 62  | 0.902  | 1          | 0.902  | 0 | 0 | 0 | 1 Ref      |
| MK907273 | Unassigned | Unassigned | Unassigned | 470_0  | Clustered | 62 VC_470_0  | 62  | 0.902  | 1          | 0.902  | 0 | 0 | 0 | 1 Ref      |
| MK907274 | Unassigned | Unassigned | Unassigned | 470_0  | Clustered | 62 VC_470_0  | 62  | 0.902  | 1          | 0.902  | 0 | 0 | 0 | 1 Ref      |
| MK907275 | Unassigned | Unassigned | Unassigned | 470_0  | Clustered | 62 VC_470_0  | 62  | 0.902  | 1          | 0.902  | 0 | 0 | 0 | 1 Ref      |
| MK907276 | Unassigned | Unassigned | Unassigned | 470_0  | Clustered | 62 VC_470_0  | 62  | 0.902  | 1          | 0.902  | 0 | 0 | 0 | 1 Ref      |
| MK907285 | Unassigned | Unassigned | Unassigned | 399_0  | Clustered | 49 VC_399_0  | 49  | 0.7927 | 1          | 0.7927 | 0 | 0 | 0 | 1 Ref      |
| MK907780 | Unassigned | Unassigned | Unassigned | 1007_1 | Clustered | 24 VC_1007_1 | 24  | 0.7364 | 1          | 0.7364 | 0 | 0 | 0 | 0.8877 Ref |
| MK919469 | Unassigned | Unassigned | Unassigned | 543_1  | Clustered | 5 VC_543_1   | 5   | 0.0484 | 0.99999947 | 0.0484 | 0 | 0 | 0 | 0.9 Ref    |
| MK919470 | Unassigned | Unassigned | Unassigned | 1217_0 | Clustered | 41 VC_1217_0 | 41  | 0.9546 | 1          | 0.9546 | 0 | 0 | 0 | 0.9976 Ref |
| MK919471 | Unassigned | Unassigned | Unassigned | 1296_0 | Clustered | 82 VC_1296_0 | 82  | 0.7938 | 1          | 0.7938 | 0 | 0 | 0 | 1 Ref      |
| MK919472 | Unassigned | Unassigned | Unassigned | 223_6  | Clustered | 42 VC_223_6  | 42  | 0.4717 | 1          | 0.4717 | 0 | 0 | 0 | 0.8351 Ref |
| MK919473 | Unassigned | Unassigned | Unassigned | 825_0  | Clustered | 17 VC_825_0  | 17  | 0.8364 | 1          | 0.8364 | 0 | 0 | 0 | 1 Ref      |
| MK919474 | Unassigned | Unassigned | Unassigned | 881_1  | Clustered | 13 VC_881_1  | 13  | 0.5859 | 1          | 0.5859 | 0 | 0 | 0 | 1 Ref      |
| MK919475 | Unassigned | Unassigned | Unassigned | 783_0  | Clustered | 67 VC_783_0  | 67  | 0.8945 | 1          | 0.8945 | 0 | 0 | 0 | 1 Ref      |
| MK919476 | Unassigned | Unassigned | Unassigned | 1200_0 | Clustered | 73 VC_1200_0 | 73  | 0.9825 | 1          | 0.9825 | 0 | 0 | 0 | 1 Ref      |
| MK919477 | Unassigned | Unassigned | Unassigned | 893_1  | Clustered | 20 VC_893_1  | 20  | 0.4792 | 1          | 0.4792 | 0 | 0 | 0 | 1 Ref      |
| MK919478 | Unassigned | Unassigned | Unassigned | 1225_0 | Clustered | 6 VC_1225_0  | 6   | 0.9947 | 0.99996974 | 0.9947 | 0 | 0 | 0 | 1 Ref      |
| MK919479 | Unassigned | Unassigned | Unassigned | 1116_0 | Clustered | 24 VC_1116_0 | 24  | 0.8376 | 1          | 0.8376 | 0 | 0 | 0 | 1 Ref      |
| MK919480 | Unassigned | Unassigned | Unassigned | 537_0  | Clustered | 39 VC_537_0  | 39  | 0.8148 | 1          | 0.8148 | 0 | 0 | 0 | 1 Ref      |
| MK919481 | Unassigned | Unassigned | Unassigned | 893_1  | Clustered | 20 VC_893_1  | 20  | 0.4792 | 1          | 0.4792 | 0 | 0 | 0 | 1 Ref      |
| MK919482 | Unassigned | Unassigned | Unassigned | 834_0  | Clustered | 18 VC_834_0  | 18  | 0.9116 | 1          | 0.9116 | 0 | 0 | 0 | 1 Ref      |
| MK919483 | Unassigned | Unassigned | Unassigned | 543_0  | Clustered | 25 VC_543_0  | 25  | 0.4584 | 1          | 0.4584 | 0 | 0 | 0 | 1 Ref      |
| MK919484 | Unassigned | Unassigned | Unassigned | 1200_0 | Clustered | 73 VC_1200_0 | 73  | 0.9825 | 1          | 0.9825 | 0 | 0 | 0 | 1 Ref      |



|          |            |            |            |         |                     |              |    |        |            |        |   |   |   |            |
|----------|------------|------------|------------|---------|---------------------|--------------|----|--------|------------|--------|---|---|---|------------|
| MK922546 | Unassigned | Unassigned | Unassigned | 98_0    | Clustered           | 30 VC_98_0   | 30 | 0.7175 | 1          | 0.7175 | 0 | 0 | 0 | 1 Ref      |
| MK922547 | Unassigned | Unassigned | Unassigned | 98_0    | Clustered           | 30 VC_98_0   | 30 | 0.7175 | 1          | 0.7175 | 0 | 0 | 0 | 1 Ref      |
| MK922548 | Unassigned | Unassigned | Unassigned | 98_0    | Clustered           | 30 VC_98_0   | 30 | 0.7175 | 1          | 0.7175 | 0 | 0 | 0 | 1 Ref      |
| MK929790 | Unassigned | Unassigned | Unassigned | 1472_0  | Clustered           | 2 VC_1472_0  | 2  | 0.8077 | 0.81445332 | 0.6579 | 0 | 0 | 0 | 1 Ref      |
| MK931297 | Unassigned | Unassigned | Unassigned | 801_0   | Clustered           | 37 VC_801_0  | 37 | 0.5672 | 1          | 0.5672 | 0 | 0 | 0 | 1 Ref      |
| MK931438 | Unassigned | Unassigned | Unassigned | 655_0   | Clustered           | 45 VC_655_0  | 45 | 0.7722 | 1          | 0.7722 | 0 | 0 | 0 | 1 Ref      |
| MK931439 | Unassigned | Unassigned | Unassigned | 655_0   | Clustered           | 45 VC_655_0  | 45 | 0.7722 | 1          | 0.7722 | 0 | 0 | 0 | 1 Ref      |
| MK931440 | Unassigned | Unassigned | Unassigned | 655_0   | Clustered           | 45 VC_655_0  | 45 | 0.7722 | 1          | 0.7722 | 0 | 0 | 0 | 1 Ref      |
| MK931441 | Unassigned | Unassigned | Unassigned | 655_0   | Clustered           | 45 VC_655_0  | 45 | 0.7722 | 1          | 0.7722 | 0 | 0 | 0 | 1 Ref      |
| MK931442 | Unassigned | Unassigned | Unassigned | 972_0   | Clustered           | 99 VC_972_0  | 99 | 0.9113 | 1          | 0.9113 | 0 | 0 | 0 | 0.9928 Ref |
| MK931443 | Unassigned | Unassigned | Unassigned | 972_0   | Clustered           | 99 VC_972_0  | 99 | 0.9113 | 1          | 0.9113 | 0 | 0 | 0 | 0.9928 Ref |
| MK931444 | Unassigned | Unassigned | Unassigned | 972_0   | Clustered           | 99 VC_972_0  | 99 | 0.9113 | 1          | 0.9113 | 0 | 0 | 0 | 0.9928 Ref |
| MK931445 | Unassigned | Unassigned | Unassigned | 972_0   | Clustered           | 99 VC_972_0  | 99 | 0.9113 | 1          | 0.9113 | 0 | 0 | 0 | 0.9928 Ref |
| MK931446 | Unassigned | Unassigned | Unassigned | 654_1   | Clustered           | 27 VC_654_1  | 27 | 0.2571 | 1          | 0.2571 | 0 | 0 | 0 | 0.9858 Ref |
| MK932884 | Unassigned | Unassigned | Unassigned | 875_0   | Clustered           | 2 VC_875_0   | 2  | 0.3804 | 0.94412959 | 0.3591 | 0 | 0 | 0 | 1 Ref      |
| MK934841 | Unassigned | Unassigned | Unassigned | 192_0   | Clustered           | 22 VC_192_0  | 22 | 0.6582 | 1          | 0.6582 | 0 | 0 | 0 | 1 Ref      |
| MK936475 | Unassigned | Unassigned | Unassigned | 98_0    | Clustered           | 30 VC_98_0   | 30 | 0.7175 | 1          | 0.7175 | 0 | 0 | 0 | 1 Ref      |
| MK936476 | Unassigned | Unassigned | Unassigned | 98_0    | Clustered           | 30 VC_98_0   | 30 | 0.7175 | 1          | 0.7175 | 0 | 0 | 0 | 1 Ref      |
| MK937591 | Unassigned | Unassigned | Unassigned | 1412_0  | Clustered           | 7 VC_1412_0  | 7  | 0.2471 | 1          | 0.2471 | 0 | 0 | 0 | 1 Ref      |
| MK937593 | Unassigned | Unassigned | Unassigned | 571_0   | Clustered           | 16 VC_571_0  | 16 | 0.091  | 1          | 0.091  | 0 | 0 | 0 | 0.6667 Ref |
| MK937594 | Unassigned | Unassigned | Unassigned | 1136_0  | Clustered           | 40 VC_1136_0 | 40 | 0.8746 | 1          | 0.8746 | 0 | 0 | 0 | 1 Ref      |
| MK937595 | Unassigned | Unassigned | Unassigned | 387_0   | Clustered           | 2 VC_387_0   | 2  | 0.1249 | 0.95576264 | 0.1193 | 0 | 0 | 0 | 1 Ref      |
| MK937596 | Unassigned | Unassigned | Unassigned | 881_1   | Clustered           | 13 VC_881_1  | 13 | 0.5859 | 1          | 0.5859 | 0 | 0 | 0 | 1 Ref      |
| MK937597 | Unassigned | Unassigned | Unassigned | 578_0   | Clustered           | 3 VC_578_0   | 3  | 0.0807 | 0.99853749 | 0.0806 | 0 | 0 | 0 | 0.6667 Ref |
| MK937598 | Unassigned | Unassigned | Unassigned | 1287_0  | Clustered           | 44 VC_1287_0 | 44 | 1      | 1          | 1      | 0 | 0 | 0 | 1 Ref      |
| MK937599 | Unassigned | Unassigned | Unassigned | 1218_0  | Clustered           | 14 VC_1218_0 | 14 | 0.7811 | 1          | 0.7811 | 0 | 0 | 0 | 0.989 Ref  |
| MK937600 | Unassigned | Unassigned | Unassigned | 917_0   | Clustered           | 28 VC_917_0  | 28 | 0.5465 | 1          | 0.5465 | 0 | 0 | 0 | 1 Ref      |
| MK937601 | Unassigned | Unassigned | Unassigned | 1136_0  | Clustered           | 40 VC_1136_0 | 40 | 0.8746 | 1          | 0.8746 | 0 | 0 | 0 | 1 Ref      |
| MK937602 | Unassigned | Unassigned | Unassigned | 1203_0  | Clustered           | 28 VC_1203_0 | 28 | 0.4905 | 1          | 0.4905 | 0 | 0 | 0 | 1 Ref      |
| MK937603 | Unassigned | Unassigned | Unassigned | 1219_0  | Clustered           | 24 VC_1219_0 | 24 | 0.9519 | 1          | 0.9519 | 0 | 0 | 0 | 1 Ref      |
| MK937604 | Unassigned | Unassigned | Unassigned | 537_0   | Clustered           | 39 VC_537_0  | 39 | 0.8148 | 1          | 0.8148 | 0 | 0 | 0 | 1 Ref      |
| MK937606 | Unassigned | Unassigned | Unassigned | 1412_0  | Clustered           | 7 VC_1412_0  | 7  | 0.2471 | 1          | 0.2471 | 0 | 0 | 0 | 1 Ref      |
| MK937607 | Unassigned | Unassigned | Unassigned | 1138_0  | Clustered           | 16 VC_1138_0 | 16 | 0.4566 | 1          | 0.4566 | 0 | 0 | 0 | 1 Ref      |
| MK937608 | Unassigned | Unassigned | Unassigned | 1412_0  | Clustered           | 7 VC_1412_0  | 7  | 0.2471 | 1          | 0.2471 | 0 | 0 | 0 | 1 Ref      |
| MK937610 | Unassigned | Unassigned | Unassigned | 1287_0  | Clustered           | 44 VC_1287_0 | 44 | 1      | 1          | 1      | 0 | 0 | 0 | 1 Ref      |
| MK937611 | Unassigned | Unassigned | Unassigned | 1138_0  | Clustered           | 16 VC_1138_0 | 16 | 0.4566 | 1          | 0.4566 | 0 | 0 | 0 | 1 Ref      |
| MK937612 | Unassigned | Unassigned | Unassigned | 785_1   | Clustered           | 9 VC_785_1   | 9  | 0.3679 | 1          | 0.3679 | 0 | 0 | 0 | 1 Ref      |
| MK937613 | Unassigned | Unassigned | Unassigned | 1243_0  | Clustered           | 8 VC_1243_0  | 8  | 0.8266 | 1          | 0.8266 | 0 | 0 | 0 | 1 Ref      |
| MK940809 | Unassigned | Unassigned | Unassigned | 8_0     | Clustered           | 58 VC_8_0    | 58 | 0.8285 | 1          | 0.8285 | 0 | 0 | 0 | 0.9946 Ref |
| MK942064 | Unassigned | Unassigned | Unassigned | 289_0   | Clustered           | 2 VC_289_0   | 2  | 0.219  | 0.95471323 | 0.2091 | 0 | 0 | 0 | 1 Ref      |
| MK947458 | Unassigned | Unassigned | Unassigned | 199_16  | Clustered           | 12 VC_199_16 | 12 | 0.064  | 1          | 0.064  | 0 | 0 | 0 | 0.9394 Ref |
| MK947459 | Unassigned | Unassigned | Unassigned | 199_17  | Clustered           | 4 VC_199_17  | 4  | 0.0165 | 0.99893269 | 0.0165 | 0 | 0 | 0 | 0.8333 Ref |
| MK947460 | Unassigned | Unassigned | Unassigned | 475_0   | Clustered           | 96 VC_475_0  | 96 | 0.9303 | 1          | 0.9303 | 0 | 0 | 0 | 0.9575 Ref |
| MK962626 | Unassigned | Unassigned | Unassigned | 801_1   | Clustered           | 11 VC_801_1  | 11 | 0.1583 | 1          | 0.1583 | 0 | 0 | 0 | 1 Ref      |
| MK962627 | Unassigned | Unassigned | Unassigned | 177_0   | Clustered           | 8 VC_177_0   | 8  | 0.5848 | 1          | 0.5848 | 0 | 0 | 0 | 1 Ref      |
| MK962628 | Unassigned | Unassigned | Unassigned | 163_0   | Clustered           | 3 VC_163_0   | 3  | 0.3713 | 0.99808097 | 0.3706 | 0 | 0 | 0 | 1 Ref      |
| MK962629 | Unassigned | Unassigned | Unassigned | 801_1   | Clustered           | 11 VC_801_1  | 11 | 0.1583 | 1          | 0.1583 | 0 | 0 | 0 | 1 Ref      |
| MK962630 | Unassigned | Unassigned | Unassigned | 801_1   | Clustered           | 11 VC_801_1  | 11 | 0.1583 | 1          | 0.1583 | 0 | 0 | 0 | 1 Ref      |
| MK962631 | Unassigned | Unassigned | Unassigned | 801_1   | Clustered           | 11 VC_801_1  | 11 | 0.1583 | 1          | 0.1583 | 0 | 0 | 0 | 1 Ref      |
| MK962632 | Unassigned | Unassigned | Unassigned | 801_1   | Clustered           | 11 VC_801_1  | 11 | 0.1583 | 1          | 0.1583 | 0 | 0 | 0 | 1 Ref      |
| MK962633 | Unassigned | Unassigned | Unassigned | 177_0   | Clustered           | 8 VC_177_0   | 8  | 0.5848 | 1          | 0.5848 | 0 | 0 | 0 | 1 Ref      |
| MK962634 | Unassigned | Unassigned | Unassigned | 177_0   | Clustered           | 8 VC_177_0   | 8  | 0.5848 | 1          | 0.5848 | 0 | 0 | 0 | 1 Ref      |
| MK962635 | Unassigned | Unassigned | Unassigned | 768_0   | Clustered           | 4 VC_768_0   | 4  | 0.1754 | 0.99998526 | 0.1754 | 0 | 0 | 0 | 1 Ref      |
| MK962636 | Unassigned | Unassigned | Unassigned | 768_0   | Clustered           | 4 VC_768_0   | 4  | 0.1754 | 0.99998526 | 0.1754 | 0 | 0 | 0 | 1 Ref      |
| MK962637 | Unassigned | Unassigned | Unassigned | 768_0   | Clustered           | 4 VC_768_0   | 4  | 0.1754 | 0.99998526 | 0.1754 | 0 | 0 | 0 | 1 Ref      |
| MK962638 | Unassigned | Unassigned | Unassigned | 163_0   | Clustered           | 3 VC_163_0   | 3  | 0.3713 | 0.99808097 | 0.3706 | 0 | 0 | 0 | 1 Ref      |
| MK962639 | Unassigned | Unassigned | Unassigned | 801_1   | Clustered           | 11 VC_801_1  | 11 | 0.1583 | 1          | 0.1583 | 0 | 0 | 0 | 1 Ref      |
| MK962640 | Unassigned | Unassigned | Unassigned | 163_0   | Clustered           | 3 VC_163_0   | 3  | 0.3713 | 0.99808097 | 0.3706 | 0 | 0 | 0 | 1 Ref      |
| MK962641 | Unassigned | Unassigned | Unassigned | 801_1   | Clustered           | 11 VC_801_1  | 11 | 0.1583 | 1          | 0.1583 | 0 | 0 | 0 | 1 Ref      |
| MK962749 | Unassigned | Unassigned | Unassigned | 794_1   | Clustered           | 2 VC_794_1   | 2  | 0.006  | 0.57682361 | 0.0034 | 0 | 0 | 0 | 1 Ref      |
| MK962750 | Unassigned | Unassigned | Unassigned | 290_169 | Clustered/Singleton | 1 VC_290_169 | 1  | 0      | 1          | 0      | 0 | 0 | 0 | 1 Ref      |
| MK962751 | Unassigned | Unassigned | Unassigned | 976_0   | Clustered           | 36 VC_976_0  | 36 | 0.7833 | 1          | 0.7833 | 0 | 0 | 0 | 1 Ref      |
| MK962752 | Unassigned | Unassigned | Unassigned | 290_120 | Clustered/Singleton | 1 VC_290_120 | 1  | 0      | 1          | 0      | 0 | 0 | 0 | 1 Ref      |
| MK962753 | Unassigned | Unassigned | Unassigned | 609_0   | Clustered           | 27 VC_609_0  | 27 | 0.9943 | 1          | 0.9943 | 0 | 0 | 0 | 1 Ref      |
| MK962754 | Unassigned | Unassigned | Unassigned | 293_1   | Clustered           | 21 VC_293_1  | 21 | 0.1694 | 1          | 0.1694 | 0 | 0 | 0 | 0.9048 Ref |
| MK962755 | Unassigned | Unassigned | Unassigned | 290_35  | Clustered/Singleton | 1 VC_290_35  | 1  | 0      | 1          | 0      | 0 | 0 | 0 | 1 Ref      |
| MK962756 | Unassigned | Unassigned | Unassigned | 293_1   | Clustered           | 21 VC_293_1  | 21 | 0.1694 | 1          | 0.1694 | 0 | 0 | 0 | 0.9048 Ref |
| MK962757 | Unassigned | Unassigned | Unassigned | 293_1   | Clustered           | 21 VC_293_1  | 21 | 0.1694 | 1          | 0.1694 | 0 | 0 | 0 | 0.9048 Ref |
| MK962758 | Unassigned | Unassigned | Unassigned | 340_3   | Clustered           | 24 VC_340_3  | 24 | 0.1205 | 1          | 0.1205 | 0 | 0 | 0 | 0.7283 Ref |
| MK965969 | Unassigned | Unassigned | Unassigned | 340_1   | Clustered           | 17 VC_340_1  | 17 | 0.0863 | 1          | 0.0863 | 0 | 0 | 0 | 0.8235 Ref |
| MK965970 | Unassigned | Unassigned | Unassigned | 340_1   | Clustered           | 17 VC_340_1  | 17 | 0.0863 | 1          | 0.0863 | 0 | 0 | 0 | 0.8235 Ref |
| MK967377 | Unassigned | Unassigned | Unassigned | 1218_0  | Clustered           | 14 VC_1218_0 | 14 | 0.7811 | 1          | 0.7811 | 0 | 0 | 0 | 0.989 Ref  |
| MK967378 | Unassigned | Unassigned | Unassigned | 919_0   | Clustered           | 3 VC_919_0   | 3  | 0.3486 | 0.99831298 | 0.348  | 0 | 0 | 0 | 1 Ref      |
| MK967379 | Unassigned | Unassigned | Unassigned | 566_4   | Clustered           | 16 VC_566_4  | 16 | 0.2517 | 0.9999998  | 0.2517 | 0 | 0 | 0 | 0.9417 Ref |
| MK967381 | Unassigned | Unassigned | Unassigned | 1219_0  | Clustered           | 24 VC_1219_0 | 24 | 0.9519 | 1          | 0.9519 | 0 | 0 | 0 | 1 Ref      |
| MK967382 | Unassigned | Unassigned | Unassigned | 231_0   | Clustered           | 19 VC_231_0  | 19 | 0.9378 | 1          | 0.9378 | 0 | 0 | 0 | 1 Ref      |
| MK967383 | Unassigned | Unassigned | Unassigned | 952_0   | Clustered           | 39 VC_952_0  | 39 | 0.9064 | 1          | 0.9064 | 0 | 0 | 0 | 1 Ref      |
| MK967384 | Unassigned | Unassigned | Unassigned | 543_1   | Clustered           | 5 VC_543_1   | 5  | 0.0484 | 0.99999947 | 0.0484 | 0 | 0 | 0 | 0.9 Ref    |
| MK967385 | Unassigned | Unassigned | Unassigned | 952_0   | Clustered           | 39 VC_952_0  | 39 | 0.9064 | 1          | 0.9064 | 0 | 0 | 0 | 1 Ref      |
| MK967386 | Unassigned | Unassigned | Unassigned | 901_0   | Clustered           | 31 VC_901_0  | 31 | 0.8235 | 1          | 0.8235 | 0 | 0 | 0 | 0.8194 Ref |
| MK967387 | Unassigned | Unassigned | Unassigned | 335_19  | Clustered           | 3 VC_335_19  | 3  | 0.0107 | 0.99859221 | 0.0107 | 0 | 0 | 0 | 1 Ref      |



|          |            |            |            |         |                     |              |     |        |            |        |   |   |   |            |
|----------|------------|------------|------------|---------|---------------------|--------------|-----|--------|------------|--------|---|---|---|------------|
| MK967388 | Unassigned | Unassigned | Unassigned | 1296_0  | Clustered           | 82 VC_1296_0 | 82  | 0.7938 | 1          | 0.7938 | 0 | 0 | 0 | 1 Ref      |
| MK967389 | Unassigned | Unassigned | Unassigned | 1217_0  | Clustered           | 41 VC_1217_0 | 41  | 0.9546 | 1          | 0.9546 | 0 | 0 | 0 | 0.9976 Ref |
| MK967390 | Unassigned | Unassigned | Unassigned | 895_0   | Clustered           | 25 VC_895_0  | 25  | 0.5768 | 1          | 0.5768 | 0 | 0 | 0 | 1 Ref      |
| MK967391 | Unassigned | Unassigned | Unassigned | 1296_0  | Clustered           | 82 VC_1296_0 | 82  | 0.7938 | 1          | 0.7938 | 0 | 0 | 0 | 1 Ref      |
| MK967392 | Unassigned | Unassigned | Unassigned | 989_0   | Clustered           | 13 VC_989_0  | 13  | 0.8622 | 1          | 0.8622 | 0 | 0 | 0 | 1 Ref      |
| MK967393 | Unassigned | Unassigned | Unassigned | 988_0   | Clustered           | 2 VC_988_0   | 2   | 0.2055 | 0.9488174  | 0.195  | 0 | 0 | 0 | 1 Ref      |
| MK967394 | Unassigned | Unassigned | Unassigned | 1296_0  | Clustered           | 82 VC_1296_0 | 82  | 0.7938 | 1          | 0.7938 | 0 | 0 | 0 | 1 Ref      |
| MK967395 | Unassigned | Unassigned | Unassigned | 223_4   | Clustered           | 13 VC_223_4  | 13  | 0.1649 | 1          | 0.1649 | 0 | 0 | 0 | 1 Ref      |
| MK967396 | Unassigned | Unassigned | Unassigned | 1136_0  | Clustered           | 40 VC_1136_0 | 40  | 0.8746 | 1          | 0.8746 | 0 | 0 | 0 | 1 Ref      |
| MK967397 | Unassigned | Unassigned | Unassigned | 538_94  | Clustered/Singleton | 1 VC_538_94  | 1   | 0      | 1          | 0      | 0 | 0 | 0 | 1 Ref      |
| MK967398 | Unassigned | Unassigned | Unassigned | 825_0   | Clustered           | 17 VC_825_0  | 17  | 0.8364 | 1          | 0.8364 | 0 | 0 | 0 | 1 Ref      |
| MK967399 | Unassigned | Unassigned | Unassigned | 532_0   | Clustered           | 75 VC_532_0  | 75  | 0.9393 | 1          | 0.9393 | 0 | 0 | 0 | 1 Ref      |
| MK967400 | Unassigned | Unassigned | Unassigned | 1296_0  | Clustered           | 82 VC_1296_0 | 82  | 0.7938 | 1          | 0.7938 | 0 | 0 | 0 | 1 Ref      |
| MK967401 | Unassigned | Unassigned | Unassigned | 335_40  | Clustered           | 2 VC_335_40  | 2   | 0.004  | 0.95751617 | 0.0039 | 0 | 0 | 0 | 1 Ref      |
| MK967402 | Unassigned | Unassigned | Unassigned | 566_4   | Clustered           | 16 VC_566_4  | 16  | 0.2517 | 0.9999998  | 0.2517 | 0 | 0 | 0 | 0.9417 Ref |
| MK972685 | Unassigned | Unassigned | Unassigned | 30_1    | Clustered           | 53 VC_30_1   | 53  | 0.7151 | 1          | 0.7151 | 0 | 0 | 0 | 0.9325 Ref |
| MK972686 | Unassigned | Unassigned | Unassigned | 30_1    | Clustered           | 53 VC_30_1   | 53  | 0.7151 | 1          | 0.7151 | 0 | 0 | 0 | 0.9325 Ref |
| MK972687 | Unassigned | Unassigned | Unassigned | 30_1    | Clustered           | 53 VC_30_1   | 53  | 0.7151 | 1          | 0.7151 | 0 | 0 | 0 | 0.9325 Ref |
| MK972690 | Unassigned | Unassigned | Unassigned | 135_21  | Clustered/Singleton | 1 VC_135_21  | 1   | 0      | 1          | 0      | 0 | 0 | 0 | 1 Ref      |
| MK972691 | Unassigned | Unassigned | Unassigned | 654_0   | Clustered           | 115 VC_654_0 | 115 | 0.7303 | 1          | 0.7303 | 0 | 0 | 0 | 0.8764 Ref |
| MK972692 | Unassigned | Unassigned | Unassigned | 30_1    | Clustered           | 53 VC_30_1   | 53  | 0.7151 | 1          | 0.7151 | 0 | 0 | 0 | 0.9325 Ref |
| MK972693 | Unassigned | Unassigned | Unassigned | 30_1    | Clustered           | 53 VC_30_1   | 53  | 0.7151 | 1          | 0.7151 | 0 | 0 | 0 | 0.9325 Ref |
| MK972694 | Unassigned | Unassigned | Unassigned | 30_1    | Clustered           | 53 VC_30_1   | 53  | 0.7151 | 1          | 0.7151 | 0 | 0 | 0 | 0.9325 Ref |
| MK972698 | Unassigned | Unassigned | Unassigned | 135_48  | Clustered           | 2 VC_135_48  | 2   | 0.0051 | 0.93000885 | 0.0047 | 0 | 0 | 0 | 1 Ref      |
| MK972699 | Unassigned | Unassigned | Unassigned | 135_48  | Clustered           | 2 VC_135_48  | 2   | 0.0051 | 0.93000885 | 0.0047 | 0 | 0 | 0 | 1 Ref      |
| MK972700 | Unassigned | Unassigned | Unassigned | 654_0   | Clustered           | 115 VC_654_0 | 115 | 0.7303 | 1          | 0.7303 | 0 | 0 | 0 | 0.8764 Ref |
| MK972701 | Unassigned | Unassigned | Unassigned | 654_0   | Clustered           | 115 VC_654_0 | 115 | 0.7303 | 1          | 0.7303 | 0 | 0 | 0 | 0.8764 Ref |
| MK972702 | Unassigned | Unassigned | Unassigned | 654_0   | Clustered           | 115 VC_654_0 | 115 | 0.7303 | 1          | 0.7303 | 0 | 0 | 0 | 0.8764 Ref |
| MK972703 | Unassigned | Unassigned | Unassigned | 654_0   | Clustered           | 115 VC_654_0 | 115 | 0.7303 | 1          | 0.7303 | 0 | 0 | 0 | 0.8764 Ref |
| MK972704 | Unassigned | Unassigned | Unassigned | 199_3   | Clustered           | 5 VC_199_3   | 5   | 0.0229 | 0.99999699 | 0.0229 | 0 | 0 | 0 | 0.8 Ref    |
| MK972705 | Unassigned | Unassigned | Unassigned | 654_0   | Clustered           | 115 VC_654_0 | 115 | 0.7303 | 1          | 0.7303 | 0 | 0 | 0 | 0.8764 Ref |
| MK972706 | Unassigned | Unassigned | Unassigned | 654_0   | Clustered           | 115 VC_654_0 | 115 | 0.7303 | 1          | 0.7303 | 0 | 0 | 0 | 0.8764 Ref |
| MK972707 | Unassigned | Unassigned | Unassigned | 199_3   | Clustered           | 5 VC_199_3   | 5   | 0.0229 | 0.99999699 | 0.0229 | 0 | 0 | 0 | 0.8 Ref    |
| MK972708 | Unassigned | Unassigned | Unassigned | 199_31  | Clustered           | 2 VC_199_31  | 2   | 0.0056 | 0.92139383 | 0.0052 | 0 | 0 | 0 | 1 Ref      |
| MK972709 | Unassigned | Unassigned | Unassigned | 199_3   | Clustered           | 5 VC_199_3   | 5   | 0.0229 | 0.99999699 | 0.0229 | 0 | 0 | 0 | 0.8 Ref    |
| MK972710 | Unassigned | Unassigned | Unassigned | 235_0   | Clustered           | 60 VC_235_0  | 60  | 0.9413 | 1          | 0.9413 | 0 | 0 | 0 | 1 Ref      |
| MK972711 | Unassigned | Unassigned | Unassigned | 235_0   | Clustered           | 60 VC_235_0  | 60  | 0.9413 | 1          | 0.9413 | 0 | 0 | 0 | 1 Ref      |
| MK972712 | Unassigned | Unassigned | Unassigned | 5_0     | Clustered           | 27 VC_5_0    | 27  | 0.9599 | 1          | 0.9599 | 0 | 0 | 0 | 1 Ref      |
| MK972713 | Unassigned | Unassigned | Unassigned | 5_0     | Clustered           | 27 VC_5_0    | 27  | 0.9599 | 1          | 0.9599 | 0 | 0 | 0 | 1 Ref      |
| MK972714 | Unassigned | Unassigned | Unassigned | 5_0     | Clustered           | 27 VC_5_0    | 27  | 0.9599 | 1          | 0.9599 | 0 | 0 | 0 | 1 Ref      |
| MK972715 | Unassigned | Unassigned | Unassigned | 198_20  | Clustered           | 4 VC_198_20  | 4   | 0.0227 | 0.99997722 | 0.0227 | 0 | 0 | 0 | 1 Ref      |
| MK972716 | Unassigned | Unassigned | Unassigned | 198_20  | Clustered           | 4 VC_198_20  | 4   | 0.0227 | 0.99997722 | 0.0227 | 0 | 0 | 0 | 1 Ref      |
| MK972717 | Unassigned | Unassigned | Unassigned | 199_16  | Clustered           | 12 VC_199_16 | 12  | 0.064  | 1          | 0.064  | 0 | 0 | 0 | 0.9394 Ref |
| MK972831 | Unassigned | Unassigned | Unassigned | 595_0   | Clustered           | 35 VC_595_0  | 35  | 0.8809 | 1          | 0.8809 | 0 | 0 | 0 | 1 Ref      |
| MK976036 | Unassigned | Unassigned | Unassigned | 23_0    | Clustered           | 11 VC_23_0   | 11  | 0.5144 | 1          | 0.5144 | 0 | 0 | 0 | 1 Ref      |
| MK977694 | Unassigned | Unassigned | Unassigned | 290_190 | Clustered/Singleton | 1 VC_290_190 | 1   | 0      | 1          | 0      | 0 | 0 | 0 | 1 Ref      |
| MK977697 | Unassigned | Unassigned | Unassigned | 1296_0  | Clustered           | 82 VC_1296_0 | 82  | 0.7938 | 1          | 0.7938 | 0 | 0 | 0 | 1 Ref      |
| MK977698 | Unassigned | Unassigned | Unassigned | 1415_0  | Clustered           | 31 VC_1415_0 | 31  | 0.8456 | 1          | 0.8456 | 0 | 0 | 0 | 1 Ref      |
| MK977699 | Unassigned | Unassigned | Unassigned | 789_0   | Clustered           | 34 VC_789_0  | 34  | 0.9167 | 1          | 0.9167 | 0 | 0 | 0 | 1 Ref      |
| MK977700 | Unassigned | Unassigned | Unassigned | 790_0   | Clustered           | 8 VC_790_0   | 8   | 0.6981 | 1          | 0.6981 | 0 | 0 | 0 | 1 Ref      |
| MK977701 | Unassigned | Unassigned | Unassigned | 702_1   | Clustered           | 2 VC_702_1   | 2   | 0.2185 | 0.91327915 | 0.1996 | 0 | 0 | 0 | 1 Ref      |
| MK977702 | Unassigned | Unassigned | Unassigned | 1136_0  | Clustered           | 40 VC_1136_0 | 40  | 0.8746 | 1          | 0.8746 | 0 | 0 | 0 | 1 Ref      |
| MK977705 | Unassigned | Unassigned | Unassigned | 1224_0  | Clustered           | 4 VC_1224_0  | 4   | 0.2813 | 0.99997676 | 0.2813 | 0 | 0 | 0 | 1 Ref      |
| MK977706 | Unassigned | Unassigned | Unassigned | 1243_0  | Clustered           | 8 VC_1243_0  | 8   | 0.8266 | 1          | 0.8266 | 0 | 0 | 0 | 1 Ref      |
| MK977708 | Unassigned | Unassigned | Unassigned | 539_0   | Clustered           | 37 VC_539_0  | 37  | 0.911  | 1          | 0.911  | 0 | 0 | 0 | 1 Ref      |
| MK977709 | Unassigned | Unassigned | Unassigned | 541_0   | Clustered/Singleton | 1 VC_541_0   | 1   | 0      | 1          | 0      | 0 | 0 | 0 | 1 Ref      |
| MK977710 | Unassigned | Unassigned | Unassigned | 1243_0  | Clustered           | 8 VC_1243_0  | 8   | 0.8266 | 1          | 0.8266 | 0 | 0 | 0 | 1 Ref      |
| MK977711 | Unassigned | Unassigned | Unassigned | 1114_3  | Clustered           | 16 VC_1114_3 | 16  | 0.2336 | 1          | 0.2336 | 0 | 0 | 0 | 0.9667 Ref |
| MK977712 | Unassigned | Unassigned | Unassigned | 1243_0  | Clustered           | 8 VC_1243_0  | 8   | 0.8266 | 1          | 0.8266 | 0 | 0 | 0 | 1 Ref      |
| MK977713 | Unassigned | Unassigned | Unassigned | 232_0   | Clustered           | 32 VC_232_0  | 32  | 0.8471 | 1          | 0.8471 | 0 | 0 | 0 | 0.996 Ref  |
| MK977714 | Unassigned | Unassigned | Unassigned | 1243_0  | Clustered           | 8 VC_1243_0  | 8   | 0.8266 | 1          | 0.8266 | 0 | 0 | 0 | 1 Ref      |
| MK977715 | Unassigned | Unassigned | Unassigned | 1243_0  | Clustered           | 8 VC_1243_0  | 8   | 0.8266 | 1          | 0.8266 | 0 | 0 | 0 | 1 Ref      |
| MK982307 | Unassigned | Unassigned | Unassigned | 711_0   | Clustered           | 48 VC_711_0  | 48  | 0.8217 | 1          | 0.8217 | 0 | 0 | 0 | 1 Ref      |
| MK994515 | Unassigned | Unassigned | Unassigned | 506_1   | Clustered           | 8 VC_506_1   | 8   | 0.2893 | 1          | 0.2893 | 0 | 0 | 0 | 1 Ref      |
| MN010755 | Unassigned | Unassigned | Unassigned | 1407_0  | Clustered           | 78 VC_1407_0 | 78  | 0.9731 | 1          | 0.9731 | 0 | 0 | 0 | 1 Ref      |
| MN010756 | Unassigned | Unassigned | Unassigned | 587_0   | Clustered           | 8 VC_587_0   | 8   | 0.4907 | 1          | 0.4907 | 0 | 0 | 0 | 1 Ref      |
| MN010757 | Unassigned | Unassigned | Unassigned | 537_0   | Clustered           | 39 VC_537_0  | 39  | 0.8148 | 1          | 0.8148 | 0 | 0 | 0 | 1 Ref      |
| MN010758 | Unassigned | Unassigned | Unassigned | 419_0   | Clustered           | 11 VC_419_0  | 11  | 0.9465 | 1          | 0.9465 | 0 | 0 | 0 | 1 Ref      |
| MN010759 | Unassigned | Unassigned | Unassigned | 1407_0  | Clustered           | 78 VC_1407_0 | 78  | 0.9731 | 1          | 0.9731 | 0 | 0 | 0 | 1 Ref      |
| MN010760 | Unassigned | Unassigned | Unassigned | 1219_0  | Clustered           | 24 VC_1219_0 | 24  | 0.9519 | 1          | 0.9519 | 0 | 0 | 0 | 1 Ref      |
| MN010761 | Unassigned | Unassigned | Unassigned | 898_1   | Clustered           | 27 VC_898_1  | 27  | 0.8894 | 1          | 0.8894 | 0 | 0 | 0 | 1 Ref      |
| MN010762 | Unassigned | Unassigned | Unassigned | 1217_0  | Clustered           | 41 VC_1217_0 | 41  | 0.9546 | 1          | 0.9546 | 0 | 0 | 0 | 0.9976 Ref |
| MN013074 | Unassigned | Unassigned | Unassigned | 398_0   | Clustered           | 51 VC_398_0  | 51  | 0.8741 | 1          | 0.8741 | 0 | 0 | 0 | 1 Ref      |
| MN013075 | Unassigned | Unassigned | Unassigned | 971_0   | Clustered           | 40 VC_971_0  | 40  | 0.6793 | 1          | 0.6793 | 0 | 0 | 0 | 0.9359 Ref |
| MN013076 | Unassigned | Unassigned | Unassigned | 971_0   | Clustered           | 40 VC_971_0  | 40  | 0.6793 | 1          | 0.6793 | 0 | 0 | 0 | 0.9359 Ref |
| MN013077 | Unassigned | Unassigned | Unassigned | 873_6   | Clustered           | 7 VC_873_6   | 7   | 0.1635 | 0.99999999 | 0.1635 | 0 | 0 | 0 | 0.9524 Ref |
| MN013078 | Unassigned | Unassigned | Unassigned | 971_0   | Clustered           | 40 VC_971_0  | 40  | 0.6793 | 1          | 0.6793 | 0 | 0 | 0 | 0.9359 Ref |
| MN013079 | Unassigned | Unassigned | Unassigned | 971_0   | Clustered           | 40 VC_971_0  | 40  | 0.6793 | 1          | 0.6793 | 0 | 0 | 0 | 0.9359 Ref |
| MN013080 | Unassigned | Unassigned | Unassigned | 971_0   | Clustered           | 40 VC_971_0  | 40  | 0.6793 | 1          | 0.6793 | 0 | 0 | 0 | 0.9359 Ref |
| MN013082 | Unassigned | Unassigned | Unassigned | 406_0   | Clustered           | 7 VC_406_0   | 7   | 0.176  | 1          | 0.176  | 0 | 0 | 0 | 1 Ref      |
| MN013083 | Unassigned | Unassigned | Unassigned | 971_0   | Clustered           | 40 VC_971_0  | 40  | 0.6793 | 1          | 0.6793 | 0 | 0 | 0 | 0.9359 Ref |



|          |            |            |            |         |                     |              |     |        |            |        |   |   |   |            |
|----------|------------|------------|------------|---------|---------------------|--------------|-----|--------|------------|--------|---|---|---|------------|
| MN013085 | Unassigned | Unassigned | Unassigned | 406_0   | Clustered           | 7 VC_406_0   | 7   | 0.176  | 1          | 0.176  | 0 | 0 | 0 | 1 Ref      |
| MN013086 | Unassigned | Unassigned | Unassigned | 40_1    | Clustered           | 2 VC_40_1    | 2   | 0.042  | 0.88750846 | 0.0373 | 0 | 0 | 0 | 1 Ref      |
| MN013087 | Unassigned | Unassigned | Unassigned | 971_0   | Clustered           | 40 VC_971_0  | 40  | 0.6793 | 1          | 0.6793 | 0 | 0 | 0 | 0.9359 Ref |
| MN013088 | Unassigned | Unassigned | Unassigned | 106_0   | Clustered           | 6 VC_106_0   | 6   | 0.8265 | 1          | 0.8265 | 0 | 0 | 0 | 1 Ref      |
| MN013089 | Unassigned | Unassigned | Unassigned | 195_1   | Clustered           | 7 VC_195_1   | 7   | 0.1409 | 1          | 0.1409 | 0 | 0 | 0 | 1 Ref      |
| MN013356 | Unassigned | Unassigned | Unassigned | 77_0    | Clustered           | 37 VC_77_0   | 37  | 0.9392 | 1          | 0.9392 | 0 | 0 | 0 | 1 Ref      |
| MN016939 | Unassigned | Unassigned | Unassigned | 235_0   | Clustered           | 60 VC_235_0  | 60  | 0.9413 | 1          | 0.9413 | 0 | 0 | 0 | 1 Ref      |
| MN018232 | Unassigned | Unassigned | Unassigned | 446_14  | Clustered/Singleton | 1 VC_446_14  | 1   | 0      | 1          | 0      | 0 | 0 | 0 | 1 Ref      |
| MN019128 | Unassigned | Unassigned | Unassigned | 604_0   | Clustered           | 4 VC_604_0   | 4   | 0.0531 | 0.99998755 | 0.0531 | 0 | 0 | 0 | 1 Ref      |
| MN022785 | Unassigned | Unassigned | Unassigned | 290_130 | Clustered/Singleton | 1 VC_290_130 | 1   | 0      | 1          | 0      | 0 | 0 | 0 | 1 Ref      |
| MN022787 | Unassigned | Unassigned | Unassigned | 198_14  | Clustered           | 3 VC_198_14  | 3   | 0.0142 | 0.99685589 | 0.0142 | 0 | 0 | 0 | 0.6667 Ref |
| MN023176 | Unassigned | Unassigned | Unassigned | 886_0   | Clustered           | 16 VC_886_0  | 16  | 0.994  | 1          | 0.994  | 0 | 0 | 0 | 1 Ref      |
| MN023177 | Unassigned | Unassigned | Unassigned | 886_0   | Clustered           | 16 VC_886_0  | 16  | 0.994  | 1          | 0.994  | 0 | 0 | 0 | 1 Ref      |
| MN023178 | Unassigned | Unassigned | Unassigned | 886_0   | Clustered           | 16 VC_886_0  | 16  | 0.994  | 1          | 0.994  | 0 | 0 | 0 | 1 Ref      |
| MN023179 | Unassigned | Unassigned | Unassigned | 886_0   | Clustered           | 16 VC_886_0  | 16  | 0.994  | 1          | 0.994  | 0 | 0 | 0 | 1 Ref      |
| MN023180 | Unassigned | Unassigned | Unassigned | 886_0   | Clustered           | 16 VC_886_0  | 16  | 0.994  | 1          | 0.994  | 0 | 0 | 0 | 1 Ref      |
| MN023181 | Unassigned | Unassigned | Unassigned | 886_0   | Clustered           | 16 VC_886_0  | 16  | 0.994  | 1          | 0.994  | 0 | 0 | 0 | 1 Ref      |
| MN023182 | Unassigned | Unassigned | Unassigned | 886_0   | Clustered           | 16 VC_886_0  | 16  | 0.994  | 1          | 0.994  | 0 | 0 | 0 | 1 Ref      |
| MN023183 | Unassigned | Unassigned | Unassigned | 886_0   | Clustered           | 16 VC_886_0  | 16  | 0.994  | 1          | 0.994  | 0 | 0 | 0 | 1 Ref      |
| MN023184 | Unassigned | Unassigned | Unassigned | 886_0   | Clustered           | 16 VC_886_0  | 16  | 0.994  | 1          | 0.994  | 0 | 0 | 0 | 1 Ref      |
| MN023185 | Unassigned | Unassigned | Unassigned | 886_0   | Clustered           | 16 VC_886_0  | 16  | 0.994  | 1          | 0.994  | 0 | 0 | 0 | 1 Ref      |
| MN023186 | Unassigned | Unassigned | Unassigned | 886_0   | Clustered           | 16 VC_886_0  | 16  | 0.994  | 1          | 0.994  | 0 | 0 | 0 | 1 Ref      |
| MN023187 | Unassigned | Unassigned | Unassigned | 886_0   | Clustered           | 16 VC_886_0  | 16  | 0.994  | 1          | 0.994  | 0 | 0 | 0 | 1 Ref      |
| MN023188 | Unassigned | Unassigned | Unassigned | 886_0   | Clustered           | 16 VC_886_0  | 16  | 0.994  | 1          | 0.994  | 0 | 0 | 0 | 1 Ref      |
| MN023189 | Unassigned | Unassigned | Unassigned | 886_0   | Clustered           | 16 VC_886_0  | 16  | 0.994  | 1          | 0.994  | 0 | 0 | 0 | 1 Ref      |
| MN023190 | Unassigned | Unassigned | Unassigned | 886_0   | Clustered           | 16 VC_886_0  | 16  | 0.994  | 1          | 0.994  | 0 | 0 | 0 | 1 Ref      |
| MN023191 | Unassigned | Unassigned | Unassigned | 886_0   | Clustered           | 16 VC_886_0  | 16  | 0.994  | 1          | 0.994  | 0 | 0 | 0 | 1 Ref      |
| MN026740 | Unassigned | Unassigned | Unassigned | 405_0   | Clustered           | 126 VC_405_0 | 126 | 0.9614 | 1          | 0.9614 | 0 | 0 | 0 | 1 Ref      |
| MN026741 | Unassigned | Unassigned | Unassigned | 198_23  | Clustered           | 10 VC_198_23 | 10  | 0.0697 | 1          | 0.0697 | 0 | 0 | 0 | 0.8444 Ref |
| MN027503 | Unassigned | Unassigned | Unassigned | 94_0    | Clustered           | 22 VC_94_0   | 22  | 0.5602 | 1          | 0.5602 | 0 | 0 | 0 | 1 Ref      |
| MN028536 | Unassigned | Unassigned | Unassigned | 11_0    | Clustered           | 19 VC_11_0   | 19  | 0.7544 | 1          | 0.7544 | 0 | 0 | 0 | 1 Ref      |
| MN029011 | Unassigned | Unassigned | Unassigned | 820_0   | Clustered           | 5 VC_820_0   | 5   | 0.332  | 0.99999997 | 0.332  | 0 | 0 | 0 | 1 Ref      |
| MN032614 | Unassigned | Unassigned | Unassigned | 456_3   | Clustered           | 3 VC_456_3   | 3   | 0.0523 | 0.99675181 | 0.0521 | 0 | 0 | 0 | 1 Ref      |
| MN038175 | Unassigned | Unassigned | Unassigned | 687_3   | Clustered/Singleton | 1 VC_687_3   | 1   | 0      | 1          | 0      | 0 | 0 | 0 | 1 Ref      |
| MN038176 | Unassigned | Unassigned | Unassigned | 913_0   | Clustered           | 28 VC_913_0  | 28  | 0.6206 | 1          | 0.6206 | 0 | 0 | 0 | 0.9841 Ref |
| MN038177 | Unassigned | Unassigned | Unassigned | 636_0   | Clustered           | 13 VC_636_0  | 13  | 0.6223 | 1          | 0.6223 | 0 | 0 | 0 | 1 Ref      |
| MN038178 | Unassigned | Unassigned | Unassigned | 912_1   | Clustered           | 12 VC_912_1  | 12  | 0.2423 | 1          | 0.2423 | 0 | 0 | 0 | 1 Ref      |
| MN038179 | Unassigned | Unassigned | Unassigned | 913_0   | Clustered           | 28 VC_913_0  | 28  | 0.6206 | 1          | 0.6206 | 0 | 0 | 0 | 0.9841 Ref |
| MN043729 | Unassigned | Unassigned | Unassigned | 87_10   | Clustered/Singleton | 1 VC_87_10   | 1   | 0      | 1          | 0      | 0 | 0 | 0 | 1 Ref      |
| MN043730 | Unassigned | Unassigned | Unassigned | 87_4    | Clustered           | 3 VC_87_4    | 3   | 0.0292 | 0.98125255 | 0.0286 | 0 | 0 | 0 | 1 Ref      |
| MN045228 | Unassigned | Unassigned | Unassigned | 155_12  | Clustered           | 2 VC_155_12  | 2   | 0.0044 | 0.82943952 | 0.0037 | 0 | 0 | 0 | 1 Ref      |
| MN045229 | Unassigned | Unassigned | Unassigned | 816_0   | Clustered           | 35 VC_816_0  | 35  | 0.9824 | 1          | 0.9824 | 0 | 0 | 0 | 1 Ref      |
| MN045230 | Unassigned | Unassigned | Unassigned | 134_2   | Clustered           | 17 VC_134_2  | 17  | 0.1715 | 1          | 0.1715 | 0 | 0 | 0 | 0.9853 Ref |
| MN045231 | Unassigned | Unassigned | Unassigned | 837_1   | Clustered           | 24 VC_837_1  | 24  | 0.5328 | 1          | 0.5328 | 0 | 0 | 0 | 1 Ref      |
| MN047438 | Unassigned | Unassigned | Unassigned | 155_8   | Clustered           | 66 VC_155_8  | 66  | 0.4537 | 1          | 0.4537 | 0 | 0 | 0 | 0.8182 Ref |
| MN047793 | Unassigned | Unassigned | Unassigned | 69_1    | Clustered/Singleton | 1 VC_69_1    | 1   | 0      | 1          | 0      | 0 | 0 | 0 | 1 Ref      |
| MN052874 | Unassigned | Unassigned | Unassigned | 848_0   | Clustered           | 124 VC_848_0 | 124 | 0.9484 | 1          | 0.9484 | 0 | 0 | 0 | 1 Ref      |
| MN055691 | Unassigned | Unassigned | Unassigned | 975_0   | Clustered           | 40 VC_975_0  | 40  | 0.6888 | 1          | 0.6888 | 0 | 0 | 0 | 1 Ref      |
| MN061582 | Unassigned | Unassigned | Unassigned | 714_0   | Clustered           | 71 VC_714_0  | 71  | 0.935  | 1          | 0.935  | 0 | 0 | 0 | 1 Ref      |
| MN062185 | Unassigned | Unassigned | Unassigned | 548_0   | Clustered           | 9 VC_548_0   | 9   | 0.8018 | 1          | 0.8018 | 0 | 0 | 0 | 1 Ref      |
| MN062186 | Unassigned | Unassigned | Unassigned | 801_3   | Clustered           | 7 VC_801_3   | 7   | 0.0764 | 1          | 0.0764 | 0 | 0 | 0 | 0.7143 Ref |
| MN062187 | Unassigned | Unassigned | Unassigned | 766_0   | Clustered           | 40 VC_766_0  | 40  | 0.7511 | 1          | 0.7511 | 0 | 0 | 0 | 1 Ref      |
| MN062188 | Unassigned | Unassigned | Unassigned | 610_0   | Clustered           | 14 VC_610_0  | 14  | 0.5159 | 1          | 0.5159 | 0 | 0 | 0 | 1 Ref      |
| MN062701 | Unassigned | Unassigned | Unassigned | 566_4   | Clustered           | 16 VC_566_4  | 16  | 0.2517 | 0.99999998 | 0.2517 | 0 | 0 | 0 | 0.9417 Ref |
| MN062702 | Unassigned | Unassigned | Unassigned | 1296_0  | Clustered           | 82 VC_1296_0 | 82  | 0.7938 | 1          | 0.7938 | 0 | 0 | 0 | 1 Ref      |
| MN062704 | Unassigned | Unassigned | Unassigned | 1217_0  | Clustered           | 41 VC_1217_0 | 41  | 0.9546 | 1          | 0.9546 | 0 | 0 | 0 | 0.9976 Ref |
| MN062706 | Unassigned | Unassigned | Unassigned | 531_0   | Clustered           | 32 VC_531_0  | 32  | 0.6859 | 1          | 0.6859 | 0 | 0 | 0 | 1 Ref      |
| MN062707 | Unassigned | Unassigned | Unassigned | 579_77  | Clustered           | 3 VC_579_77  | 3   | 0.0065 | 0.89175063 | 0.0058 | 0 | 0 | 0 | 0.6667 Ref |
| MN062708 | Unassigned | Unassigned | Unassigned | 224_1   | Clustered/Singleton | 1 VC_224_1   | 1   | 0      | 1          | 0      | 0 | 0 | 0 | 1 Ref      |
| MN062709 | Unassigned | Unassigned | Unassigned | 1296_0  | Clustered           | 82 VC_1296_0 | 82  | 0.7938 | 1          | 0.7938 | 0 | 0 | 0 | 1 Ref      |
| MN062710 | Unassigned | Unassigned | Unassigned | 335_54  | Clustered           | 5 VC_335_54  | 5   | 0.0147 | 0.99999078 | 0.0147 | 0 | 0 | 0 | 0.7 Ref    |
| MN062711 | Unassigned | Unassigned | Unassigned | 1425_0  | Clustered           | 6 VC_1425_0  | 6   | 0.2364 | 1          | 0.2364 | 0 | 0 | 0 | 1 Ref      |
| MN062712 | Unassigned | Unassigned | Unassigned | 531_0   | Clustered           | 32 VC_531_0  | 32  | 0.6859 | 1          | 0.6859 | 0 | 0 | 0 | 1 Ref      |
| MN062713 | Unassigned | Unassigned | Unassigned | 1296_0  | Clustered           | 82 VC_1296_0 | 82  | 0.7938 | 1          | 0.7938 | 0 | 0 | 0 | 1 Ref      |
| MN062714 | Unassigned | Unassigned | Unassigned | 1287_0  | Clustered           | 44 VC_1287_0 | 44  | 1      | 1          | 1      | 0 | 0 | 0 | 1 Ref      |
| MN062715 | Unassigned | Unassigned | Unassigned | 701_0   | Clustered           | 16 VC_701_0  | 16  | 0.2957 | 1          | 0.2957 | 0 | 0 | 0 | 0.9167 Ref |
| MN062716 | Unassigned | Unassigned | Unassigned | 952_0   | Clustered           | 39 VC_952_0  | 39  | 0.9064 | 1          | 0.9064 | 0 | 0 | 0 | 1 Ref      |
| MN062717 | Unassigned | Unassigned | Unassigned | 1287_0  | Clustered           | 44 VC_1287_0 | 44  | 1      | 1          | 1      | 0 | 0 | 0 | 1 Ref      |
| MN062718 | Unassigned | Unassigned | Unassigned | 532_0   | Clustered           | 75 VC_532_0  | 75  | 0.9393 | 1          | 0.9393 | 0 | 0 | 0 | 1 Ref      |
| MN062719 | Unassigned | Unassigned | Unassigned | 1415_0  | Clustered           | 31 VC_1415_0 | 31  | 0.8456 | 1          | 0.8456 | 0 | 0 | 0 | 1 Ref      |
| MN065183 | Unassigned | Unassigned | Unassigned | 20_0    | Clustered           | 5 VC_20_0    | 5   | 0.4268 | 0.99999994 | 0.4268 | 0 | 0 | 0 | 1 Ref      |
| MN066127 | Unassigned | Unassigned | Unassigned | 135_22  | Clustered           | 13 VC_135_22 | 13  | 0.0795 | 1          | 0.0795 | 0 | 0 | 0 | 0.8205 Ref |
| MN067333 | Unassigned | Unassigned | Unassigned | 44_0    | Clustered           | 49 VC_44_0   | 49  | 0.4506 | 1          | 0.4506 | 0 | 0 | 0 | 0.8605 Ref |
| MN067430 | Unassigned | Unassigned | Unassigned | 465_0   | Clustered           | 80 VC_465_0  | 80  | 0.9988 | 1          | 0.9988 | 0 | 0 | 0 | 1 Ref      |
| MN070121 | Unassigned | Unassigned | Unassigned | 560_0   | Clustered           | 15 VC_560_0  | 15  | 0.2846 | 1          | 0.2846 | 0 | 0 | 0 | 1 Ref      |
| MN078104 | Unassigned | Unassigned | Unassigned | 854_0   | Clustered           | 6 VC_854_0   | 6   | 0.514  | 1          | 0.514  | 0 | 0 | 0 | 1 Ref      |
| MN080711 | Unassigned | Unassigned | Unassigned | 399_0   | Clustered           | 49 VC_399_0  | 49  | 0.7927 | 1          | 0.7927 | 0 | 0 | 0 | 1 Ref      |
| MN082624 | Unassigned | Unassigned | Unassigned | 843_0   | Clustered           | 20 VC_843_0  | 20  | 0.9621 | 1          | 0.9621 | 0 | 0 | 0 | 1 Ref      |
| MN087708 | Unassigned | Unassigned | Unassigned | 508_1   | Clustered           | 5 VC_508_1   | 5   | 0.0439 | 0.99999996 | 0.0439 | 0 | 0 | 0 | 1 Ref      |
| MN090155 | Unassigned | Unassigned | Unassigned | 604_1   | Clustered           | 3 VC_604_1   | 3   | 0.0311 | 0.99857668 | 0.0311 | 0 | 0 | 0 | 1 Ref      |
| MN091625 | Unassigned | Unassigned | Unassigned | 155_5   | Clustered/Singleton | 1 VC_155_5   | 1   | 0      | 1          | 0      | 0 | 0 | 0 | 1 Ref      |



|          |            |            |            |        |                     |              |     |        |            |        |   |   |   |            |
|----------|------------|------------|------------|--------|---------------------|--------------|-----|--------|------------|--------|---|---|---|------------|
| MN091626 | Unassigned | Unassigned | Unassigned | 463_0  | Clustered           | 7 VC_463_0   | 7   | 0.5971 | 1          | 0.5971 | 0 | 0 | 0 | 1 Ref      |
| MN094788 | Unassigned | Unassigned | Unassigned | 67_1   | Clustered/Singleton | 1 VC_67_1    | 1   | 0      | 1          | 0      | 0 | 0 | 0 | 1 Ref      |
| MN095770 | Unassigned | Unassigned | Unassigned | 204_0  | Clustered           | 2 VC_204_0   | 2   | 0.0214 | 0.95762696 | 0.0205 | 0 | 0 | 0 | 1 Ref      |
| MN095771 | Unassigned | Unassigned | Unassigned | 291_0  | Clustered           | 3 VC_291_0   | 3   | 0.0482 | 0.99860971 | 0.0482 | 0 | 0 | 0 | 1 Ref      |
| MN095772 | Unassigned | Unassigned | Unassigned | 524_0  | Clustered           | 8 VC_524_0   | 8   | 0.7365 | 1          | 0.7365 | 0 | 0 | 0 | 1 Ref      |
| MN096356 | Unassigned | Unassigned | Unassigned | 537_0  | Clustered           | 39 VC_537_0  | 39  | 0.8148 | 1          | 0.8148 | 0 | 0 | 0 | 1 Ref      |
| MN096357 | Unassigned | Unassigned | Unassigned | 1083_0 | Clustered           | 4 VC_1083_0  | 4   | 0.8577 | 0.99997306 | 0.8576 | 0 | 0 | 0 | 1 Ref      |
| MN096358 | Unassigned | Unassigned | Unassigned | 1083_0 | Clustered           | 4 VC_1083_0  | 4   | 0.8577 | 0.99997306 | 0.8576 | 0 | 0 | 0 | 1 Ref      |
| MN096359 | Unassigned | Unassigned | Unassigned | 527_0  | Clustered           | 37 VC_527_0  | 37  | 0.9679 | 1          | 0.9679 | 0 | 0 | 0 | 1 Ref      |
| MN096360 | Unassigned | Unassigned | Unassigned | 527_0  | Clustered           | 37 VC_527_0  | 37  | 0.9679 | 1          | 0.9679 | 0 | 0 | 0 | 1 Ref      |
| MN096361 | Unassigned | Unassigned | Unassigned | 571_0  | Clustered           | 16 VC_571_0  | 16  | 0.091  | 1          | 0.091  | 0 | 0 | 0 | 0.6667 Ref |
| MN096363 | Unassigned | Unassigned | Unassigned | 897_0  | Clustered           | 5 VC_897_0   | 5   | 0.4183 | 0.99999997 | 0.4183 | 0 | 0 | 0 | 1 Ref      |
| MN096364 | Unassigned | Unassigned | Unassigned | 571_8  | Clustered           | 19 VC_571_8  | 19  | 0.1031 | 1          | 0.1031 | 0 | 0 | 0 | 0.8713 Ref |
| MN096365 | Unassigned | Unassigned | Unassigned | 1217_0 | Clustered           | 41 VC_1217_0 | 41  | 0.9546 | 1          | 0.9546 | 0 | 0 | 0 | 0.9976 Ref |
| MN096366 | Unassigned | Unassigned | Unassigned | 384_2  | Clustered           | 8 VC_384_2   | 8   | 0.0232 | 1          | 0.0232 | 0 | 0 | 0 | 0.8571 Ref |
| MN096367 | Unassigned | Unassigned | Unassigned | 1203_0 | Clustered           | 28 VC_1203_0 | 28  | 0.4905 | 1          | 0.4905 | 0 | 0 | 0 | 1 Ref      |
| MN096368 | Unassigned | Unassigned | Unassigned | 532_0  | Clustered           | 75 VC_532_0  | 75  | 0.9393 | 1          | 0.9393 | 0 | 0 | 0 | 1 Ref      |
| MN096370 | Unassigned | Unassigned | Unassigned | 578_0  | Clustered           | 3 VC_578_0   | 3   | 0.0807 | 0.99853749 | 0.0806 | 0 | 0 | 0 | 0.6667 Ref |
| MN096371 | Unassigned | Unassigned | Unassigned | 1114_3 | Clustered           | 16 VC_1114_3 | 16  | 0.2336 | 1          | 0.2336 | 0 | 0 | 0 | 0.9667 Ref |
| MN096372 | Unassigned | Unassigned | Unassigned | 974_0  | Clustered           | 34 VC_974_0  | 34  | 0.7953 | 1          | 0.7953 | 0 | 0 | 0 | 1 Ref      |
| MN096373 | Unassigned | Unassigned | Unassigned | 1016_0 | Clustered           | 62 VC_1016_0 | 62  | 0.8638 | 1          | 0.8638 | 0 | 0 | 0 | 0.743 Ref  |
| MN096374 | Unassigned | Unassigned | Unassigned | 881_1  | Clustered           | 13 VC_881_1  | 13  | 0.5859 | 1          | 0.5859 | 0 | 0 | 0 | 1 Ref      |
| MN096375 | Unassigned | Unassigned | Unassigned | 1016_0 | Clustered           | 62 VC_1016_0 | 62  | 0.8638 | 1          | 0.8638 | 0 | 0 | 0 | 0.743 Ref  |
| MN096376 | Unassigned | Unassigned | Unassigned | 225_0  | Clustered           | 3 VC_225_0   | 3   | 0.0477 | 0.99860979 | 0.0477 | 0 | 0 | 0 | 1 Ref      |
| MN096377 | Unassigned | Unassigned | Unassigned | 918_0  | Clustered           | 16 VC_918_0  | 16  | 0.2945 | 1          | 0.2945 | 0 | 0 | 0 | 1 Ref      |
| MN096378 | Unassigned | Unassigned | Unassigned | 1203_0 | Clustered           | 28 VC_1203_0 | 28  | 0.4905 | 1          | 0.4905 | 0 | 0 | 0 | 1 Ref      |
| MN096379 | Unassigned | Unassigned | Unassigned | 1016_0 | Clustered           | 62 VC_1016_0 | 62  | 0.8638 | 1          | 0.8638 | 0 | 0 | 0 | 0.743 Ref  |
| MN096380 | Unassigned | Unassigned | Unassigned | 917_0  | Clustered           | 28 VC_917_0  | 28  | 0.5465 | 1          | 0.5465 | 0 | 0 | 0 | 1 Ref      |
| MN096381 | Unassigned | Unassigned | Unassigned | 1016_0 | Clustered           | 62 VC_1016_0 | 62  | 0.8638 | 1          | 0.8638 | 0 | 0 | 0 | 0.743 Ref  |
| MN098325 | Unassigned | Unassigned | Unassigned | 98_0   | Clustered           | 30 VC_98_0   | 30  | 0.7175 | 1          | 0.7175 | 0 | 0 | 0 | 1 Ref      |
| MN098326 | Unassigned | Unassigned | Unassigned | 816_0  | Clustered           | 35 VC_816_0  | 35  | 0.9824 | 1          | 0.9824 | 0 | 0 | 0 | 1 Ref      |
| MN098327 | Unassigned | Unassigned | Unassigned | 249_1  | Clustered           | 21 VC_249_1  | 21  | 0.6775 | 1          | 0.6775 | 0 | 0 | 0 | 0.8476 Ref |
| MN098328 | Unassigned | Unassigned | Unassigned | 524_0  | Clustered           | 8 VC_524_0   | 8   | 0.7365 | 1          | 0.7365 | 0 | 0 | 0 | 1 Ref      |
| MN098329 | Unassigned | Unassigned | Unassigned | 405_0  | Clustered           | 126 VC_405_0 | 126 | 0.9614 | 1          | 0.9614 | 0 | 0 | 0 | 1 Ref      |
| MN101216 | Unassigned | Unassigned | Unassigned | 848_0  | Clustered           | 124 VC_848_0 | 124 | 0.9484 | 1          | 0.9484 | 0 | 0 | 0 | 1 Ref      |
| MN101217 | Unassigned | Unassigned | Unassigned | 113_0  | Clustered           | 91 VC_113_0  | 91  | 0.9584 | 1          | 0.9584 | 0 | 0 | 0 | 1 Ref      |
| MN101218 | Unassigned | Unassigned | Unassigned | 848_0  | Clustered           | 124 VC_848_0 | 124 | 0.9484 | 1          | 0.9484 | 0 | 0 | 0 | 1 Ref      |
| MN101219 | Unassigned | Unassigned | Unassigned | 113_0  | Clustered           | 91 VC_113_0  | 91  | 0.9584 | 1          | 0.9584 | 0 | 0 | 0 | 1 Ref      |
| MN101220 | Unassigned | Unassigned | Unassigned | 113_0  | Clustered           | 91 VC_113_0  | 91  | 0.9584 | 1          | 0.9584 | 0 | 0 | 0 | 1 Ref      |
| MN101221 | Unassigned | Unassigned | Unassigned | 686_2  | Clustered/Singleton | 1 VC_686_2   | 1   | 0      | 1          | 0      | 0 | 0 | 0 | 1 Ref      |
| MN101222 | Unassigned | Unassigned | Unassigned | 605_0  | Clustered           | 3 VC_605_0   | 3   | 0.0492 | 0.99859933 | 0.0491 | 0 | 0 | 0 | 1 Ref      |
| MN101223 | Unassigned | Unassigned | Unassigned | 686_0  | Clustered           | 25 VC_686_0  | 25  | 0.5501 | 1          | 0.5501 | 0 | 0 | 0 | 0.96 Ref   |
| MN101224 | Unassigned | Unassigned | Unassigned | 686_3  | Clustered/Singleton | 1 VC_686_3   | 1   | 0      | 1          | 0      | 0 | 0 | 0 | 1 Ref      |
| MN101225 | Unassigned | Unassigned | Unassigned | 509_1  | Clustered/Singleton | 1 VC_509_1   | 1   | 0      | 1          | 0      | 0 | 0 | 0 | 1 Ref      |
| MN101226 | Unassigned | Unassigned | Unassigned | 509_0  | Clustered           | 36 VC_509_0  | 36  | 0.5291 | 1          | 0.5291 | 0 | 0 | 0 | 0.9714 Ref |
| MN101227 | Unassigned | Unassigned | Unassigned | 848_0  | Clustered           | 124 VC_848_0 | 124 | 0.9484 | 1          | 0.9484 | 0 | 0 | 0 | 1 Ref      |
| MN101228 | Unassigned | Unassigned | Unassigned | 200_0  | Clustered           | 15 VC_200_0  | 15  | 0.5004 | 1          | 0.5004 | 0 | 0 | 0 | 1 Ref      |
| MN101229 | Unassigned | Unassigned | Unassigned | 509_0  | Clustered           | 36 VC_509_0  | 36  | 0.5291 | 1          | 0.5291 | 0 | 0 | 0 | 0.9714 Ref |
| MN101230 | Unassigned | Unassigned | Unassigned | 509_0  | Clustered           | 36 VC_509_0  | 36  | 0.5291 | 1          | 0.5291 | 0 | 0 | 0 | 0.9714 Ref |
| MN102098 | Unassigned | Unassigned | Unassigned | 456_0  | Clustered           | 4 VC_456_0   | 4   | 0.0832 | 0.99994226 | 0.0832 | 0 | 0 | 0 | 1 Ref      |
| MN103542 | Unassigned | Unassigned | Unassigned | 110_0  | Clustered           | 33 VC_110_0  | 33  | 0.9488 | 1          | 0.9488 | 0 | 0 | 0 | 1 Ref      |
| MN103543 | Unassigned | Unassigned | Unassigned | 356_1  | Clustered           | 3 VC_356_1   | 3   | 0.0359 | 0.93699065 | 0.0336 | 0 | 0 | 0 | 1 Ref      |
| MN114082 | Unassigned | Unassigned | Unassigned | 1002_0 | Clustered           | 10 VC_1002_0 | 10  | 0.9987 | 1          | 0.9987 | 0 | 0 | 0 | 1 Ref      |
| MN114083 | Unassigned | Unassigned | Unassigned | 1002_0 | Clustered           | 10 VC_1002_0 | 10  | 0.9987 | 1          | 0.9987 | 0 | 0 | 0 | 1 Ref      |
| MN116494 | Unassigned | Unassigned | Unassigned | 113_0  | Clustered           | 91 VC_113_0  | 91  | 0.9584 | 1          | 0.9584 | 0 | 0 | 0 | 1 Ref      |
| MN117721 | Unassigned | Unassigned | Unassigned | 816_0  | Clustered           | 35 VC_816_0  | 35  | 0.9824 | 1          | 0.9824 | 0 | 0 | 0 | 1 Ref      |
| MN119376 | Unassigned | Unassigned | Unassigned | 1278_0 | Clustered           | 19 VC_1278_0 | 19  | 1      | 1          | 1      | 0 | 0 | 0 | 1 Ref      |
| MN119377 | Unassigned | Unassigned | Unassigned | 335_37 | Clustered           | 4 VC_335_37  | 4   | 0.0112 | 0.99980442 | 0.0112 | 0 | 0 | 0 | 0.6667 Ref |
| MN119378 | Unassigned | Unassigned | Unassigned | 585_0  | Clustered           | 20 VC_585_0  | 20  | 0.8376 | 1          | 0.8376 | 0 | 0 | 0 | 1 Ref      |
| MN119379 | Unassigned | Unassigned | Unassigned | 335_10 | Clustered           | 3 VC_335_10  | 3   | 0.012  | 0.99859169 | 0.012  | 0 | 0 | 0 | 1 Ref      |
| MN122072 | Unassigned | Unassigned | Unassigned | 816_0  | Clustered           | 35 VC_816_0  | 35  | 0.9824 | 1          | 0.9824 | 0 | 0 | 0 | 1 Ref      |
| MN128593 | Unassigned | Unassigned | Unassigned | 1002_0 | Clustered           | 10 VC_1002_0 | 10  | 0.9987 | 1          | 0.9987 | 0 | 0 | 0 | 1 Ref      |
| MN128594 | Unassigned | Unassigned | Unassigned | 753_0  | Clustered           | 26 VC_753_0  | 26  | 0.9562 | 1          | 0.9562 | 0 | 0 | 0 | 1 Ref      |
| MN131137 | Unassigned | Unassigned | Unassigned | 456_0  | Clustered           | 4 VC_456_0   | 4   | 0.0832 | 0.99994226 | 0.0832 | 0 | 0 | 0 | 1 Ref      |
| MN131141 | Unassigned | Unassigned | Unassigned | 80_7   | Clustered           | 33 VC_80_7   | 33  | 0.2156 | 1          | 0.2156 | 0 | 0 | 0 | 0.8409 Ref |
| MN131142 | Unassigned | Unassigned | Unassigned | 80_7   | Clustered           | 33 VC_80_7   | 33  | 0.2156 | 1          | 0.2156 | 0 | 0 | 0 | 0.8409 Ref |
| MN131143 | Unassigned | Unassigned | Unassigned | 80_7   | Clustered           | 33 VC_80_7   | 33  | 0.2156 | 1          | 0.2156 | 0 | 0 | 0 | 0.8409 Ref |
| MN136198 | Unassigned | Unassigned | Unassigned | 816_0  | Clustered           | 35 VC_816_0  | 35  | 0.9824 | 1          | 0.9824 | 0 | 0 | 0 | 1 Ref      |
| MN148435 | Unassigned | Unassigned | Unassigned | 837_1  | Clustered           | 24 VC_837_1  | 24  | 0.5328 | 1          | 0.5328 | 0 | 0 | 0 | 1 Ref      |
| MN149903 | Unassigned | Unassigned | Unassigned | 848_0  | Clustered           | 124 VC_848_0 | 124 | 0.9484 | 1          | 0.9484 | 0 | 0 | 0 | 1 Ref      |
| MN149904 | Unassigned | Unassigned | Unassigned | 398_0  | Clustered           | 51 VC_398_0  | 51  | 0.8741 | 1          | 0.8741 | 0 | 0 | 0 | 1 Ref      |
| MN150686 | Unassigned | Unassigned | Unassigned | 195_0  | Clustered           | 4 VC_195_0   | 4   | 0.0656 | 0.9999431  | 0.0656 | 0 | 0 | 0 | 1 Ref      |
| MN150710 | Unassigned | Unassigned | Unassigned | 98_0   | Clustered           | 30 VC_98_0   | 30  | 0.7175 | 1          | 0.7175 | 0 | 0 | 0 | 1 Ref      |
| MN153503 | Unassigned | Unassigned | Unassigned | 912_4  | Clustered/Singleton | 1 VC_912_4   | 1   | 0      | 1          | 0      | 0 | 0 | 0 | 1 Ref      |
| MN153797 | Unassigned | Unassigned | Unassigned | 595_0  | Clustered           | 35 VC_595_0  | 35  | 0.8809 | 1          | 0.8809 | 0 | 0 | 0 | 1 Ref      |
| MN159079 | Unassigned | Unassigned | Unassigned | 456_0  | Clustered           | 4 VC_456_0   | 4   | 0.0832 | 0.99994226 | 0.0832 | 0 | 0 | 0 | 1 Ref      |
| MN161573 | Unassigned | Unassigned | Unassigned | 30_1   | Clustered           | 53 VC_30_1   | 53  | 0.7151 | 1          | 0.7151 | 0 | 0 | 0 | 0.9325 Ref |
| MN163280 | Unassigned | Unassigned | Unassigned | 200_0  | Clustered           | 15 VC_200_0  | 15  | 0.5004 | 1          | 0.5004 | 0 | 0 | 0 | 1 Ref      |
| MN163281 | Unassigned | Unassigned | Unassigned | 802_0  | Clustered           | 8 VC_802_0   | 8   | 0.5141 | 1          | 0.5141 | 0 | 0 | 0 | 1 Ref      |
| MN164484 | Unassigned | Unassigned | Unassigned | 470_0  | Clustered           | 62 VC_470_0  | 62  | 0.902  | 1          | 0.902  | 0 | 0 | 0 | 1 Ref      |
| MN166083 | Unassigned | Unassigned | Unassigned | 713_0  | Clustered           | 26 VC_713_0  | 26  | 0.9358 | 1          | 0.9358 | 0 | 0 | 0 | 1 Ref      |



|          |            |            |            |        |                     |              |     |        |            |        |   |   |   |        |            |
|----------|------------|------------|------------|--------|---------------------|--------------|-----|--------|------------|--------|---|---|---|--------|------------|
| MN166823 | Unassigned | Unassigned | Unassigned | 249_1  | Clustered           | 21 VC_249_1  | 21  | 0.6775 | 1          | 0.6775 | 0 | 0 | 0 | 0.8476 | Ref        |
| MN172529 | Unassigned | Unassigned | Unassigned | 753_0  | Clustered           | 26 VC_753_0  | 26  | 0.9562 | 1          | 0.9562 | 0 | 0 | 0 |        | 1 Ref      |
| MN175603 | Unassigned | Unassigned | Unassigned | 1415_0 | Clustered           | 31 VC_1415_0 | 31  | 0.8456 | 1          | 0.8456 | 0 | 0 | 0 |        | 1 Ref      |
| MN175604 | Unassigned | Unassigned | Unassigned | 540_0  | Clustered           | 3 VC_540_0   | 3   | 0.083  | 0.9985266  | 0.0829 | 0 | 0 | 0 |        | 1 Ref      |
| MN176217 | Unassigned | Unassigned | Unassigned | 636_0  | Clustered           | 13 VC_636_0  | 13  | 0.6223 | 1          | 0.6223 | 0 | 0 | 0 |        | 1 Ref      |
| MN176219 | Unassigned | Unassigned | Unassigned | 106_0  | Clustered           | 6 VC_106_0   | 6   | 0.8265 | 1          | 0.8265 | 0 | 0 | 0 |        | 1 Ref      |
| MN176222 | Unassigned | Unassigned | Unassigned | 105_0  | Clustered           | 6 VC_105_0   | 6   | 0.7335 | 1          | 0.7335 | 0 | 0 | 0 |        | 1 Ref      |
| MN176223 | Unassigned | Unassigned | Unassigned | 105_0  | Clustered           | 6 VC_105_0   | 6   | 0.7335 | 1          | 0.7335 | 0 | 0 | 0 |        | 1 Ref      |
| MN176224 | Unassigned | Unassigned | Unassigned | 105_0  | Clustered           | 6 VC_105_0   | 6   | 0.7335 | 1          | 0.7335 | 0 | 0 | 0 |        | 1 Ref      |
| MN176225 | Unassigned | Unassigned | Unassigned | 105_0  | Clustered           | 6 VC_105_0   | 6   | 0.7335 | 1          | 0.7335 | 0 | 0 | 0 |        | 1 Ref      |
| MN176226 | Unassigned | Unassigned | Unassigned | 105_0  | Clustered           | 6 VC_105_0   | 6   | 0.7335 | 1          | 0.7335 | 0 | 0 | 0 |        | 1 Ref      |
| MN176227 | Unassigned | Unassigned | Unassigned | 106_0  | Clustered           | 6 VC_106_0   | 6   | 0.8265 | 1          | 0.8265 | 0 | 0 | 0 |        | 1 Ref      |
| MN176228 | Unassigned | Unassigned | Unassigned | 106_0  | Clustered           | 6 VC_106_0   | 6   | 0.8265 | 1          | 0.8265 | 0 | 0 | 0 |        | 1 Ref      |
| MN176229 | Unassigned | Unassigned | Unassigned | 105_0  | Clustered           | 6 VC_105_0   | 6   | 0.7335 | 1          | 0.7335 | 0 | 0 | 0 |        | 1 Ref      |
| MN176572 | Unassigned | Unassigned | Unassigned | 113_0  | Clustered           | 91 VC_113_0  | 91  | 0.9584 | 1          | 0.9584 | 0 | 0 | 0 |        | 1 Ref      |
| MN176573 | Unassigned | Unassigned | Unassigned | 113_0  | Clustered           | 91 VC_113_0  | 91  | 0.9584 | 1          | 0.9584 | 0 | 0 | 0 |        | 1 Ref      |
| MN176574 | Unassigned | Unassigned | Unassigned | 848_0  | Clustered           | 124 VC_848_0 | 124 | 0.9484 | 1          | 0.9484 | 0 | 0 | 0 |        | 1 Ref      |
| MN180248 | Unassigned | Unassigned | Unassigned | 23_0   | Clustered           | 11 VC_23_0   | 11  | 0.5144 | 1          | 0.5144 | 0 | 0 | 0 |        | 1 Ref      |
| MN180249 | Unassigned | Unassigned | Unassigned | 23_0   | Clustered           | 11 VC_23_0   | 11  | 0.5144 | 1          | 0.5144 | 0 | 0 | 0 |        | 1 Ref      |
| MN180250 | Unassigned | Unassigned | Unassigned | 23_0   | Clustered           | 11 VC_23_0   | 11  | 0.5144 | 1          | 0.5144 | 0 | 0 | 0 |        | 1 Ref      |
| MN180251 | Unassigned | Unassigned | Unassigned | 23_0   | Clustered           | 11 VC_23_0   | 11  | 0.5144 | 1          | 0.5144 | 0 | 0 | 0 |        | 1 Ref      |
| MN180252 | Unassigned | Unassigned | Unassigned | 23_0   | Clustered           | 11 VC_23_0   | 11  | 0.5144 | 1          | 0.5144 | 0 | 0 | 0 |        | 1 Ref      |
| MN183279 | Unassigned | Unassigned | Unassigned | 1116_0 | Clustered           | 24 VC_1116_0 | 24  | 0.8376 | 1          | 0.8376 | 0 | 0 | 0 |        | 1 Ref      |
| MN183280 | Unassigned | Unassigned | Unassigned | 579_60 | Clustered/Singleton | 1 VC_579_60  | 1   | 0      | 1          | 0      | 0 | 0 | 0 |        | 1 Ref      |
| MN183281 | Unassigned | Unassigned | Unassigned | 1287_0 | Clustered           | 44 VC_1287_0 | 44  | 1      | 1          | 1      | 0 | 0 | 0 |        | 1 Ref      |
| MN183282 | Unassigned | Unassigned | Unassigned | 1084_0 | Clustered           | 2 VC_1084_0  | 2   | 0.0596 | 0.95667911 | 0.057  | 0 | 0 | 0 |        | 1 Ref      |
| MN183283 | Unassigned | Unassigned | Unassigned | 1116_0 | Clustered           | 24 VC_1116_0 | 24  | 0.8376 | 1          | 0.8376 | 0 | 0 | 0 |        | 1 Ref      |
| MN183284 | Unassigned | Unassigned | Unassigned | 1212_0 | Clustered           | 21 VC_1212_0 | 21  | 0.711  | 1          | 0.711  | 0 | 0 | 0 |        | 1 Ref      |
| MN183285 | Unassigned | Unassigned | Unassigned | 579_18 | Clustered/Singleton | 1 VC_579_18  | 1   | 0      | 1          | 0      | 0 | 0 | 0 |        | 1 Ref      |
| MN183286 | Unassigned | Unassigned | Unassigned | 566_4  | Clustered           | 16 VC_566_4  | 16  | 0.2517 | 0.9999998  | 0.2517 | 0 | 0 | 0 |        | 0.9417 Ref |
| MN184885 | Unassigned | Unassigned | Unassigned | 408_0  | Clustered           | 5 VC_408_0   | 5   | 0.1003 | 0.9999998  | 0.1003 | 0 | 0 | 0 |        | 1 Ref      |
| MN184887 | Unassigned | Unassigned | Unassigned | 601_0  | Clustered           | 4 VC_601_0   | 4   | 0.0581 | 0.99996075 | 0.0581 | 0 | 0 | 0 |        | 1 Ref      |
| MN187550 | Unassigned | Unassigned | Unassigned | 492_0  | Clustered           | 20 VC_492_0  | 20  | 0.7887 | 1          | 0.7887 | 0 | 0 | 0 |        | 1 Ref      |
| MN187969 | Unassigned | Unassigned | Unassigned | 199_19 | Clustered           | 12 VC_199_19 | 12  | 0.0651 | 1          | 0.0651 | 0 | 0 | 0 |        | 0.8636 Ref |
| MN191861 | Unassigned | Unassigned | Unassigned | 71_0   | Clustered           | 27 VC_71_0   | 27  | 0.5964 | 1          | 0.5964 | 0 | 0 | 0 |        | 0.9943 Ref |
| MN197465 | Unassigned | Unassigned | Unassigned | 199_10 | Clustered/Singleton | 1 VC_199_10  | 1   | 0      | 1          | 0      | 0 | 0 | 0 |        | 1 Ref      |
| MN200777 | Unassigned | Unassigned | Unassigned | 27_0   | Clustered           | 4 VC_27_0    | 4   | 0.7397 | 0.99936153 | 0.7392 | 0 | 0 | 0 |        | 1 Ref      |
| MN200778 | Unassigned | Unassigned | Unassigned | 27_0   | Clustered           | 4 VC_27_0    | 4   | 0.7397 | 0.99936153 | 0.7392 | 0 | 0 | 0 |        | 1 Ref      |
| MN204492 | Unassigned | Unassigned | Unassigned | 901_0  | Clustered           | 31 VC_901_0  | 31  | 0.8235 | 1          | 0.8235 | 0 | 0 | 0 |        | 0.8194 Ref |
| MN204493 | Unassigned | Unassigned | Unassigned | 953_0  | Clustered           | 2 VC_953_0   | 2   | 0.1642 | 0.95556296 | 0.1569 | 0 | 0 | 0 |        | 1 Ref      |
| MN204494 | Unassigned | Unassigned | Unassigned | 901_0  | Clustered           | 31 VC_901_0  | 31  | 0.8235 | 1          | 0.8235 | 0 | 0 | 0 |        | 0.8194 Ref |
| MN204495 | Unassigned | Unassigned | Unassigned | 901_0  | Clustered           | 31 VC_901_0  | 31  | 0.8235 | 1          | 0.8235 | 0 | 0 | 0 |        | 0.8194 Ref |
| MN204496 | Unassigned | Unassigned | Unassigned | 901_0  | Clustered           | 31 VC_901_0  | 31  | 0.8235 | 1          | 0.8235 | 0 | 0 | 0 |        | 0.8194 Ref |
| MN204497 | Unassigned | Unassigned | Unassigned | 901_0  | Clustered           | 31 VC_901_0  | 31  | 0.8235 | 1          | 0.8235 | 0 | 0 | 0 |        | 0.8194 Ref |
| MN204498 | Unassigned | Unassigned | Unassigned | 1016_0 | Clustered           | 62 VC_1016_0 | 62  | 0.8638 | 1          | 0.8638 | 0 | 0 | 0 |        | 0.743 Ref  |
| MN204499 | Unassigned | Unassigned | Unassigned | 1117_0 | Clustered           | 19 VC_1117_0 | 19  | 0.9177 | 1          | 0.9177 | 0 | 0 | 0 |        | 1 Ref      |
| MN204500 | Unassigned | Unassigned | Unassigned | 901_0  | Clustered           | 31 VC_901_0  | 31  | 0.8235 | 1          | 0.8235 | 0 | 0 | 0 |        | 0.8194 Ref |
| MN204501 | Unassigned | Unassigned | Unassigned | 898_1  | Clustered           | 27 VC_898_1  | 27  | 0.8894 | 1          | 0.8894 | 0 | 0 | 0 |        | 1 Ref      |
| MN204503 | Unassigned | Unassigned | Unassigned | 1117_0 | Clustered           | 19 VC_1117_0 | 19  | 0.9177 | 1          | 0.9177 | 0 | 0 | 0 |        | 1 Ref      |
| MN204504 | Unassigned | Unassigned | Unassigned | 901_0  | Clustered           | 31 VC_901_0  | 31  | 0.8235 | 1          | 0.8235 | 0 | 0 | 0 |        | 0.8194 Ref |
| MN212906 | Unassigned | Unassigned | Unassigned | 714_0  | Clustered           | 71 VC_714_0  | 71  | 0.935  | 1          | 0.935  | 0 | 0 | 0 |        | 1 Ref      |
| MN215888 | Unassigned | Unassigned | Unassigned | 911_0  | Clustered           | 20 VC_911_0  | 20  | 0.9915 | 1          | 0.9915 | 0 | 0 | 0 |        | 1 Ref      |
| MN218190 | Unassigned | Unassigned | Unassigned | 199_16 | Clustered           | 12 VC_199_16 | 12  | 0.064  | 1          | 0.064  | 0 | 0 | 0 |        | 0.9394 Ref |
| MN218191 | Unassigned | Unassigned | Unassigned | 199_16 | Clustered           | 12 VC_199_16 | 12  | 0.064  | 1          | 0.064  | 0 | 0 | 0 |        | 0.9394 Ref |
| MN218775 | Unassigned | Unassigned | Unassigned | 465_0  | Clustered           | 80 VC_465_0  | 80  | 0.9988 | 1          | 0.9988 | 0 | 0 | 0 |        | 1 Ref      |
| MN224564 | Unassigned | Unassigned | Unassigned | 1416_0 | Clustered           | 10 VC_1416_0 | 10  | 1      | 1          | 1      | 0 | 0 | 0 |        | 1 Ref      |
| MN224565 | Unassigned | Unassigned | Unassigned | 1416_0 | Clustered           | 10 VC_1416_0 | 10  | 1      | 1          | 1      | 0 | 0 | 0 |        | 1 Ref      |
| MN227145 | Unassigned | Unassigned | Unassigned | 340_11 | Clustered           | 15 VC_340_11 | 15  | 0.079  | 1          | 0.079  | 0 | 0 | 0 |        | 0.9333 Ref |
| MN228696 | Unassigned | Unassigned | Unassigned | 805_0  | Clustered           | 3 VC_805_0   | 3   | 0.0632 | 0.99854868 | 0.0631 | 0 | 0 | 0 |        | 1 Ref      |
| MN234161 | Unassigned | Unassigned | Unassigned | 1217_0 | Clustered           | 41 VC_1217_0 | 41  | 0.9546 | 1          | 0.9546 | 0 | 0 | 0 |        | 0.9976 Ref |
| MN234162 | Unassigned | Unassigned | Unassigned | 592_0  | Clustered           | 16 VC_592_0  | 16  | 0.7259 | 1          | 0.7259 | 0 | 0 | 0 |        | 1 Ref      |
| MN234163 | Unassigned | Unassigned | Unassigned | 1296_0 | Clustered           | 82 VC_1296_0 | 82  | 0.7938 | 1          | 0.7938 | 0 | 0 | 0 |        | 1 Ref      |
| MN234164 | Unassigned | Unassigned | Unassigned | 882_0  | Clustered           | 11 VC_882_0  | 11  | 0.943  | 1          | 0.943  | 0 | 0 | 0 |        | 1 Ref      |
| MN234165 | Unassigned | Unassigned | Unassigned | 243_1  | Clustered           | 5 VC_243_1   | 5   | 0.0356 | 0.99999997 | 0.0356 | 0 | 0 | 0 |        | 1 Ref      |
| MN234166 | Unassigned | Unassigned | Unassigned | 896_0  | Clustered           | 9 VC_896_0   | 9   | 0.2604 | 1          | 0.2604 | 0 | 0 | 0 |        | 1 Ref      |
| MN234167 | Unassigned | Unassigned | Unassigned | 232_0  | Clustered           | 32 VC_232_0  | 32  | 0.8471 | 1          | 0.8471 | 0 | 0 | 0 |        | 0.996 Ref  |
| MN234168 | Unassigned | Unassigned | Unassigned | 1204_0 | Clustered           | 25 VC_1204_0 | 25  | 0.7382 | 1          | 0.7382 | 0 | 0 | 0 |        | 1 Ref      |
| MN234169 | Unassigned | Unassigned | Unassigned | 222_1  | Clustered           | 19 VC_222_1  | 19  | 0.4166 | 1          | 0.4166 | 0 | 0 | 0 |        | 1 Ref      |
| MN234171 | Unassigned | Unassigned | Unassigned | 385_0  | Clustered           | 24 VC_385_0  | 24  | 0.5516 | 1          | 0.5516 | 0 | 0 | 0 |        | 1 Ref      |
| MN234174 | Unassigned | Unassigned | Unassigned | 243_1  | Clustered           | 5 VC_243_1   | 5   | 0.0356 | 0.99999997 | 0.0356 | 0 | 0 | 0 |        | 1 Ref      |
| MN234176 | Unassigned | Unassigned | Unassigned | 244_2  | Clustered           | 11 VC_244_2  | 11  | 0.1403 | 1          | 0.1403 | 0 | 0 | 0 |        | 0.9818 Ref |
| MN234177 | Unassigned | Unassigned | Unassigned | 1296_0 | Clustered           | 82 VC_1296_0 | 82  | 0.7938 | 1          | 0.7938 | 0 | 0 | 0 |        | 1 Ref      |
| MN234178 | Unassigned | Unassigned | Unassigned | 883_0  | Clustered           | 5 VC_883_0   | 5   | 0.3514 | 0.99996062 | 0.3514 | 0 | 0 | 0 |        | 1 Ref      |
| MN234179 | Unassigned | Unassigned | Unassigned | 1217_0 | Clustered           | 41 VC_1217_0 | 41  | 0.9546 | 1          | 0.9546 | 0 | 0 | 0 |        | 0.9976 Ref |
| MN234181 | Unassigned | Unassigned | Unassigned | 1296_0 | Clustered           | 82 VC_1296_0 | 82  | 0.7938 | 1          | 0.7938 | 0 | 0 | 0 |        | 1 Ref      |
| MN234182 | Unassigned | Unassigned | Unassigned | 243_0  | Clustered           | 72 VC_243_0  | 72  | 0.8089 | 1          | 0.8089 | 0 | 0 | 0 |        | 1 Ref      |
| MN234183 | Unassigned | Unassigned | Unassigned | 784_0  | Clustered           | 9 VC_784_0   | 9   | 0.0884 | 1          | 0.0884 | 0 | 0 | 0 |        | 1 Ref      |
| MN234185 | Unassigned | Unassigned | Unassigned | 784_0  | Clustered           | 9 VC_784_0   | 9   | 0.0884 | 1          | 0.0884 | 0 | 0 | 0 |        | 1 Ref      |
| MN234190 | Unassigned | Unassigned | Unassigned | 592_0  | Clustered           | 16 VC_592_0  | 16  | 0.7259 | 1          | 0.7259 | 0 | 0 | 0 |        | 1 Ref      |
| MN234192 | Unassigned | Unassigned | Unassigned | 1015_1 | Clustered           | 26 VC_1015_1 | 26  | 0.6989 | 1          | 0.6989 | 0 | 0 | 0 |        | 1 Ref      |
| MN234193 | Unassigned | Unassigned | Unassigned | 579_36 | Clustered           | 4 VC_579_36  | 4   | 0.0096 | 0.84559358 | 0.0081 | 0 | 0 | 0 |        | 1 Ref      |



|          |            |            |            |        |                     |              |    |        |            |        |   |   |   |            |
|----------|------------|------------|------------|--------|---------------------|--------------|----|--------|------------|--------|---|---|---|------------|
| MN234194 | Unassigned | Unassigned | Unassigned | 1204_0 | Clustered           | 25 VC_1204_0 | 25 | 0.7382 | 1          | 0.7382 | 0 | 0 | 0 | 1 Ref      |
| MN234195 | Unassigned | Unassigned | Unassigned | 536_0  | Clustered           | 6 VC_536_0   | 6  | 0.129  | 1          | 0.129  | 0 | 0 | 0 | 1 Ref      |
| MN234196 | Unassigned | Unassigned | Unassigned | 528_0  | Clustered           | 12 VC_528_0  | 12 | 0.3923 | 1          | 0.3923 | 0 | 0 | 0 | 0.9697 Ref |
| MN234197 | Unassigned | Unassigned | Unassigned | 243_0  | Clustered           | 72 VC_243_0  | 72 | 0.8089 | 1          | 0.8089 | 0 | 0 | 0 | 1 Ref      |
| MN234198 | Unassigned | Unassigned | Unassigned | 243_0  | Clustered           | 72 VC_243_0  | 72 | 0.8089 | 1          | 0.8089 | 0 | 0 | 0 | 1 Ref      |
| MN234199 | Unassigned | Unassigned | Unassigned | 244_1  | Clustered           | 13 VC_244_1  | 13 | 0.1766 | 1          | 0.1766 | 0 | 0 | 0 | 0.7308 Ref |
| MN234200 | Unassigned | Unassigned | Unassigned | 232_0  | Clustered           | 32 VC_232_0  | 32 | 0.8471 | 1          | 0.8471 | 0 | 0 | 0 | 0.996 Ref  |
| MN234201 | Unassigned | Unassigned | Unassigned | 243_1  | Clustered           | 5 VC_243_1   | 5  | 0.0356 | 0.99999997 | 0.0356 | 0 | 0 | 0 | 1 Ref      |
| MN234203 | Unassigned | Unassigned | Unassigned | 223_6  | Clustered           | 42 VC_223_6  | 42 | 0.4717 | 1          | 0.4717 | 0 | 0 | 0 | 0.8351 Ref |
| MN234204 | Unassigned | Unassigned | Unassigned | 1296_0 | Clustered           | 82 VC_1296_0 | 82 | 0.7938 | 1          | 0.7938 | 0 | 0 | 0 | 1 Ref      |
| MN234205 | Unassigned | Unassigned | Unassigned | 243_0  | Clustered           | 72 VC_243_0  | 72 | 0.8089 | 1          | 0.8089 | 0 | 0 | 0 | 1 Ref      |
| MN234206 | Unassigned | Unassigned | Unassigned | 1142_0 | Clustered           | 2 VC_1142_0  | 2  | 0.258  | 0.94673154 | 0.2442 | 0 | 0 | 0 | 1 Ref      |
| MN234207 | Unassigned | Unassigned | Unassigned | 592_0  | Clustered           | 16 VC_592_0  | 16 | 0.7259 | 1          | 0.7259 | 0 | 0 | 0 | 1 Ref      |
| MN234208 | Unassigned | Unassigned | Unassigned | 1015_1 | Clustered           | 26 VC_1015_1 | 26 | 0.6989 | 1          | 0.6989 | 0 | 0 | 0 | 1 Ref      |
| MN234209 | Unassigned | Unassigned | Unassigned | 232_0  | Clustered           | 32 VC_232_0  | 32 | 0.8471 | 1          | 0.8471 | 0 | 0 | 0 | 0.996 Ref  |
| MN234211 | Unassigned | Unassigned | Unassigned | 1142_0 | Clustered           | 2 VC_1142_0  | 2  | 0.258  | 0.94673154 | 0.2442 | 0 | 0 | 0 | 1 Ref      |
| MN234212 | Unassigned | Unassigned | Unassigned | 335_54 | Clustered           | 5 VC_335_54  | 5  | 0.0147 | 0.99999078 | 0.0147 | 0 | 0 | 0 | 0.7 Ref    |
| MN234213 | Unassigned | Unassigned | Unassigned | 984_0  | Clustered           | 5 VC_984_0   | 5  | 0.1708 | 0.99999984 | 0.1708 | 0 | 0 | 0 | 1 Ref      |
| MN234214 | Unassigned | Unassigned | Unassigned | 1207_0 | Clustered           | 20 VC_1207_0 | 20 | 0.9898 | 1          | 0.9898 | 0 | 0 | 0 | 1 Ref      |
| MN234215 | Unassigned | Unassigned | Unassigned | 952_0  | Clustered           | 39 VC_952_0  | 39 | 0.9064 | 1          | 0.9064 | 0 | 0 | 0 | 1 Ref      |
| MN234217 | Unassigned | Unassigned | Unassigned | 882_0  | Clustered           | 11 VC_882_0  | 11 | 0.943  | 1          | 0.943  | 0 | 0 | 0 | 1 Ref      |
| MN234219 | Unassigned | Unassigned | Unassigned | 784_0  | Clustered           | 9 VC_784_0   | 9  | 0.0884 | 1          | 0.0884 | 0 | 0 | 0 | 1 Ref      |
| MN234220 | Unassigned | Unassigned | Unassigned | 592_0  | Clustered           | 16 VC_592_0  | 16 | 0.7259 | 1          | 0.7259 | 0 | 0 | 0 | 1 Ref      |
| MN234221 | Unassigned | Unassigned | Unassigned | 1204_0 | Clustered           | 25 VC_1204_0 | 25 | 0.7382 | 1          | 0.7382 | 0 | 0 | 0 | 1 Ref      |
| MN234222 | Unassigned | Unassigned | Unassigned | 1296_0 | Clustered           | 82 VC_1296_0 | 82 | 0.7938 | 1          | 0.7938 | 0 | 0 | 0 | 1 Ref      |
| MN234223 | Unassigned | Unassigned | Unassigned | 527_0  | Clustered           | 37 VC_527_0  | 37 | 0.9679 | 1          | 0.9679 | 0 | 0 | 0 | 1 Ref      |
| MN234224 | Unassigned | Unassigned | Unassigned | 882_0  | Clustered           | 11 VC_882_0  | 11 | 0.943  | 1          | 0.943  | 0 | 0 | 0 | 1 Ref      |
| MN234225 | Unassigned | Unassigned | Unassigned | 526_0  | Clustered           | 32 VC_526_0  | 32 | 0.9037 | 1          | 0.9037 | 0 | 0 | 0 | 1 Ref      |
| MN234226 | Unassigned | Unassigned | Unassigned | 243_1  | Clustered           | 5 VC_243_1   | 5  | 0.0356 | 0.99999997 | 0.0356 | 0 | 0 | 0 | 1 Ref      |
| MN234227 | Unassigned | Unassigned | Unassigned | 585_0  | Clustered           | 20 VC_585_0  | 20 | 0.8376 | 1          | 0.8376 | 0 | 0 | 0 | 1 Ref      |
| MN234228 | Unassigned | Unassigned | Unassigned | 917_0  | Clustered           | 28 VC_917_0  | 28 | 0.5465 | 1          | 0.5465 | 0 | 0 | 0 | 1 Ref      |
| MN234230 | Unassigned | Unassigned | Unassigned | 243_0  | Clustered           | 72 VC_243_0  | 72 | 0.8089 | 1          | 0.8089 | 0 | 0 | 0 | 1 Ref      |
| MN234231 | Unassigned | Unassigned | Unassigned | 243_0  | Clustered           | 72 VC_243_0  | 72 | 0.8089 | 1          | 0.8089 | 0 | 0 | 0 | 1 Ref      |
| MN234232 | Unassigned | Unassigned | Unassigned | 592_0  | Clustered           | 16 VC_592_0  | 16 | 0.7259 | 1          | 0.7259 | 0 | 0 | 0 | 1 Ref      |
| MN234233 | Unassigned | Unassigned | Unassigned | 1244_0 | Clustered           | 4 VC_1244_0  | 4  | 0.8666 | 0.9999992  | 0.8666 | 0 | 0 | 0 | 1 Ref      |
| MN234234 | Unassigned | Unassigned | Unassigned | 1117_0 | Clustered           | 19 VC_1117_0 | 19 | 0.9177 | 1          | 0.9177 | 0 | 0 | 0 | 1 Ref      |
| MN234235 | Unassigned | Unassigned | Unassigned | 232_0  | Clustered           | 32 VC_232_0  | 32 | 0.8471 | 1          | 0.8471 | 0 | 0 | 0 | 0.996 Ref  |
| MN234236 | Unassigned | Unassigned | Unassigned | 536_0  | Clustered           | 6 VC_536_0   | 6  | 0.129  | 1          | 0.129  | 0 | 0 | 0 | 1 Ref      |
| MN241318 | Unassigned | Unassigned | Unassigned | 94_0   | Clustered           | 22 VC_94_0   | 22 | 0.5602 | 1          | 0.5602 | 0 | 0 | 0 | 1 Ref      |
| MN252582 | Unassigned | Unassigned | Unassigned | 399_0  | Clustered           | 49 VC_399_0  | 49 | 0.7927 | 1          | 0.7927 | 0 | 0 | 0 | 1 Ref      |
| MN263053 | Unassigned | Unassigned | Unassigned | 184_0  | Clustered           | 5 VC_184_0   | 5  | 0.7721 | 0.99998991 | 0.7721 | 0 | 0 | 0 | 1 Ref      |
| MN270258 | Unassigned | Unassigned | Unassigned | 647_0  | Clustered           | 37 VC_647_0  | 37 | 0.5847 | 1          | 0.5847 | 0 | 0 | 0 | 0.9234 Ref |
| MN270259 | Unassigned | Unassigned | Unassigned | 647_0  | Clustered           | 37 VC_647_0  | 37 | 0.5847 | 1          | 0.5847 | 0 | 0 | 0 | 0.9234 Ref |
| MN270260 | Unassigned | Unassigned | Unassigned | 647_0  | Clustered           | 37 VC_647_0  | 37 | 0.5847 | 1          | 0.5847 | 0 | 0 | 0 | 0.9234 Ref |
| MN270261 | Unassigned | Unassigned | Unassigned | 647_0  | Clustered           | 37 VC_647_0  | 37 | 0.5847 | 1          | 0.5847 | 0 | 0 | 0 | 0.9234 Ref |
| MN270262 | Unassigned | Unassigned | Unassigned | 647_0  | Clustered           | 37 VC_647_0  | 37 | 0.5847 | 1          | 0.5847 | 0 | 0 | 0 | 0.9234 Ref |
| MN270263 | Unassigned | Unassigned | Unassigned | 647_0  | Clustered           | 37 VC_647_0  | 37 | 0.5847 | 1          | 0.5847 | 0 | 0 | 0 | 0.9234 Ref |
| MN270264 | Unassigned | Unassigned | Unassigned | 647_0  | Clustered           | 37 VC_647_0  | 37 | 0.5847 | 1          | 0.5847 | 0 | 0 | 0 | 0.9234 Ref |
| MN270265 | Unassigned | Unassigned | Unassigned | 647_0  | Clustered           | 37 VC_647_0  | 37 | 0.5847 | 1          | 0.5847 | 0 | 0 | 0 | 0.9234 Ref |
| MN270266 | Unassigned | Unassigned | Unassigned | 647_0  | Clustered           | 37 VC_647_0  | 37 | 0.5847 | 1          | 0.5847 | 0 | 0 | 0 | 0.9234 Ref |
| MN270267 | Unassigned | Unassigned | Unassigned | 647_0  | Clustered           | 37 VC_647_0  | 37 | 0.5847 | 1          | 0.5847 | 0 | 0 | 0 | 0.9234 Ref |
| MN270268 | Unassigned | Unassigned | Unassigned | 647_0  | Clustered           | 37 VC_647_0  | 37 | 0.5847 | 1          | 0.5847 | 0 | 0 | 0 | 0.9234 Ref |
| MN270269 | Unassigned | Unassigned | Unassigned | 647_0  | Clustered           | 37 VC_647_0  | 37 | 0.5847 | 1          | 0.5847 | 0 | 0 | 0 | 0.9234 Ref |
| MN270270 | Unassigned | Unassigned | Unassigned | 647_0  | Clustered           | 37 VC_647_0  | 37 | 0.5847 | 1          | 0.5847 | 0 | 0 | 0 | 0.9234 Ref |
| MN270271 | Unassigned | Unassigned | Unassigned | 647_0  | Clustered           | 37 VC_647_0  | 37 | 0.5847 | 1          | 0.5847 | 0 | 0 | 0 | 0.9234 Ref |
| MN270272 | Unassigned | Unassigned | Unassigned | 647_0  | Clustered           | 37 VC_647_0  | 37 | 0.5847 | 1          | 0.5847 | 0 | 0 | 0 | 0.9234 Ref |
| MN270273 | Unassigned | Unassigned | Unassigned | 647_0  | Clustered           | 37 VC_647_0  | 37 | 0.5847 | 1          | 0.5847 | 0 | 0 | 0 | 0.9234 Ref |
| MN270274 | Unassigned | Unassigned | Unassigned | 647_0  | Clustered           | 37 VC_647_0  | 37 | 0.5847 | 1          | 0.5847 | 0 | 0 | 0 | 0.9234 Ref |
| MN270275 | Unassigned | Unassigned | Unassigned | 647_0  | Clustered           | 37 VC_647_0  | 37 | 0.5847 | 1          | 0.5847 | 0 | 0 | 0 | 0.9234 Ref |
| MN270276 | Unassigned | Unassigned | Unassigned | 647_0  | Clustered           | 37 VC_647_0  | 37 | 0.5847 | 1          | 0.5847 | 0 | 0 | 0 | 0.9234 Ref |
| MN270277 | Unassigned | Unassigned | Unassigned | 647_0  | Clustered           | 37 VC_647_0  | 37 | 0.5847 | 1          | 0.5847 | 0 | 0 | 0 | 0.9234 Ref |
| MN270278 | Unassigned | Unassigned | Unassigned | 647_0  | Clustered           | 37 VC_647_0  | 37 | 0.5847 | 1          | 0.5847 | 0 | 0 | 0 | 0.9234 Ref |
| MN270279 | Unassigned | Unassigned | Unassigned | 647_0  | Clustered           | 37 VC_647_0  | 37 | 0.5847 | 1          | 0.5847 | 0 | 0 | 0 | 0.9234 Ref |
| MN270887 | Unassigned | Unassigned | Unassigned | 1018_0 | Clustered           | 38 VC_1018_0 | 38 | 0.9757 | 1          | 0.9757 | 0 | 0 | 0 | 1 Ref      |
| MN270888 | Unassigned | Unassigned | Unassigned | 1018_0 | Clustered           | 38 VC_1018_0 | 38 | 0.9757 | 1          | 0.9757 | 0 | 0 | 0 | 1 Ref      |
| MN270891 | Unassigned | Unassigned | Unassigned | 342_0  | Clustered           | 4 VC_342_0   | 4  | 0.0875 | 0.99998775 | 0.0875 | 0 | 0 | 0 | 1 Ref      |
| MN270892 | Unassigned | Unassigned | Unassigned | 342_0  | Clustered           | 4 VC_342_0   | 4  | 0.0875 | 0.99998775 | 0.0875 | 0 | 0 | 0 | 1 Ref      |
| MN271656 | Unassigned | Unassigned | Unassigned | 1018_0 | Clustered           | 38 VC_1018_0 | 38 | 0.9757 | 1          | 0.9757 | 0 | 0 | 0 | 1 Ref      |
| MN276049 | Unassigned | Unassigned | Unassigned | 716_0  | Clustered           | 2 VC_716_0   | 2  | 0.1472 | 0.95249915 | 0.1402 | 0 | 0 | 0 | 1 Ref      |
| MN276192 | Unassigned | Unassigned | Unassigned | 579_40 | Clustered/Singleton | 1 VC_579_40  | 1  | 0      | 1          | 0      | 0 | 0 | 0 | 1 Ref      |
| MN284892 | Unassigned | Unassigned | Unassigned | 1407_0 | Clustered           | 78 VC_1407_0 | 78 | 0.9731 | 1          | 0.9731 | 0 | 0 | 0 | 1 Ref      |
| MN284893 | Unassigned | Unassigned | Unassigned | 385_1  | Clustered           | 9 VC_385_1   | 9  | 0.1928 | 1          | 0.1928 | 0 | 0 | 0 | 1 Ref      |
| MN284894 | Unassigned | Unassigned | Unassigned | 1278_0 | Clustered           | 19 VC_1278_0 | 19 | 1      | 1          | 1      | 0 | 0 | 0 | 1 Ref      |
| MN284895 | Unassigned | Unassigned | Unassigned | 244_3  | Clustered           | 8 VC_244_3   | 8  | 0.1086 | 1          | 0.1086 | 0 | 0 | 0 | 1 Ref      |
| MN284896 | Unassigned | Unassigned | Unassigned | 898_1  | Clustered           | 27 VC_898_1  | 27 | 0.8894 | 1          | 0.8894 | 0 | 0 | 0 | 1 Ref      |
| MN284897 | Unassigned | Unassigned | Unassigned | 825_0  | Clustered           | 17 VC_825_0  | 17 | 0.8364 | 1          | 0.8364 | 0 | 0 | 0 | 1 Ref      |
| MN284898 | Unassigned | Unassigned | Unassigned | 231_0  | Clustered           | 19 VC_231_0  | 19 | 0.9378 | 1          | 0.9378 | 0 | 0 | 0 | 1 Ref      |
| MN284899 | Unassigned | Unassigned | Unassigned | 1016_0 | Clustered           | 62 VC_1016_0 | 62 | 0.8638 | 1          | 0.8638 | 0 | 0 | 0 | 0.743 Ref  |
| MN284900 | Unassigned | Unassigned | Unassigned | 532_0  | Clustered           | 75 VC_532_0  | 75 | 0.9393 | 1          | 0.9393 | 0 | 0 | 0 | 1 Ref      |
| MN284901 | Unassigned | Unassigned | Unassigned | 1203_0 | Clustered           | 28 VC_1203_0 | 28 | 0.4905 | 1          | 0.4905 | 0 | 0 | 0 | 1 Ref      |
| MN284902 | Unassigned | Unassigned | Unassigned | 1204_0 | Clustered           | 25 VC_1204_0 | 25 | 0.7382 | 1          | 0.7382 | 0 | 0 | 0 | 1 Ref      |



|          |            |            |            |        |                     |              |     |        |            |        |   |   |   |            |
|----------|------------|------------|------------|--------|---------------------|--------------|-----|--------|------------|--------|---|---|---|------------|
| MN284904 | Unassigned | Unassigned | Unassigned | 898_1  | Clustered           | 27 VC_898_1  | 27  | 0.8894 | 1          | 0.8894 | 0 | 0 | 0 | 1 Ref      |
| MN284905 | Unassigned | Unassigned | Unassigned | 535_0  | Clustered           | 18 VC_535_0  | 18  | 0.1595 | 1          | 0.1595 | 0 | 0 | 0 | 1 Ref      |
| MN284906 | Unassigned | Unassigned | Unassigned | 952_0  | Clustered           | 39 VC_952_0  | 39  | 0.9064 | 1          | 0.9064 | 0 | 0 | 0 | 1 Ref      |
| MN284907 | Unassigned | Unassigned | Unassigned | 1219_0 | Clustered           | 24 VC_1219_0 | 24  | 0.9519 | 1          | 0.9519 | 0 | 0 | 0 | 1 Ref      |
| MN284908 | Unassigned | Unassigned | Unassigned | 585_0  | Clustered           | 20 VC_585_0  | 20  | 0.8376 | 1          | 0.8376 | 0 | 0 | 0 | 1 Ref      |
| MN294712 | Unassigned | Unassigned | Unassigned | 714_0  | Clustered           | 71 VC_714_0  | 71  | 0.935  | 1          | 0.935  | 0 | 0 | 0 | 1 Ref      |
| MN296515 | Unassigned | Unassigned | Unassigned | 595_0  | Clustered           | 35 VC_595_0  | 35  | 0.8809 | 1          | 0.8809 | 0 | 0 | 0 | 1 Ref      |
| MN304941 | Unassigned | Unassigned | Unassigned | 155_15 | Clustered           | 16 VC_155_15 | 16  | 0.0779 | 1          | 0.0779 | 0 | 0 | 0 | 0.8083 Ref |
| MN310541 | Unassigned | Unassigned | Unassigned | 227_0  | Clustered           | 4 VC_227_0   | 4   | 0.0609 | 0.99998808 | 0.0609 | 0 | 0 | 0 | 1 Ref      |
| MN310542 | Unassigned | Unassigned | Unassigned | 232_0  | Clustered           | 32 VC_232_0  | 32  | 0.8471 | 1          | 0.8471 | 0 | 0 | 0 | 0.996 Ref  |
| MN310543 | Unassigned | Unassigned | Unassigned | 1203_0 | Clustered           | 28 VC_1203_0 | 28  | 0.4905 | 1          | 0.4905 | 0 | 0 | 0 | 1 Ref      |
| MN310544 | Unassigned | Unassigned | Unassigned | 538_75 | Clustered/Singleton | 1 VC_538_75  | 1   | 0      | 1          | 0      | 0 | 0 | 0 | 1 Ref      |
| MN310545 | Unassigned | Unassigned | Unassigned | 538_82 | Clustered/Singleton | 1 VC_538_82  | 1   | 0      | 1          | 0      | 0 | 0 | 0 | 1 Ref      |
| MN310546 | Unassigned | Unassigned | Unassigned | 1424_0 | Clustered           | 31 VC_1424_0 | 31  | 0.8834 | 1          | 0.8834 | 0 | 0 | 0 | 1 Ref      |
| MN310547 | Unassigned | Unassigned | Unassigned | 228_0  | Clustered           | 22 VC_228_0  | 22  | 0.7411 | 1          | 0.7411 | 0 | 0 | 0 | 1 Ref      |
| MN310548 | Unassigned | Unassigned | Unassigned | 538_7  | Clustered/Singleton | 1 VC_538_7   | 1   | 0      | 1          | 0      | 0 | 0 | 0 | 1 Ref      |
| MN310549 | Unassigned | Unassigned | Unassigned | 952_0  | Clustered           | 39 VC_952_0  | 39  | 0.9064 | 1          | 0.9064 | 0 | 0 | 0 | 1 Ref      |
| MN311487 | Unassigned | Unassigned | Unassigned | 1319_0 | Clustered           | 2 VC_1319_0  | 2   | 0.1187 | 0.95613564 | 0.1135 | 0 | 0 | 0 | 1 Ref      |
| MN311488 | Unassigned | Unassigned | Unassigned | 1104_0 | Clustered           | 44 VC_1104_0 | 44  | 0.9574 | 0.72818579 | 0.6972 | 0 | 0 | 0 | 1 Ref      |
| MN311489 | Unassigned | Unassigned | Unassigned | 1104_0 | Clustered           | 44 VC_1104_0 | 44  | 0.9574 | 0.72818579 | 0.6972 | 0 | 0 | 0 | 1 Ref      |
| MN311490 | Unassigned | Unassigned | Unassigned | 1104_0 | Clustered           | 44 VC_1104_0 | 44  | 0.9574 | 0.72818579 | 0.6972 | 0 | 0 | 0 | 1 Ref      |
| MN311491 | Unassigned | Unassigned | Unassigned | 1104_0 | Clustered           | 44 VC_1104_0 | 44  | 0.9574 | 0.72818579 | 0.6972 | 0 | 0 | 0 | 1 Ref      |
| MN311492 | Unassigned | Unassigned | Unassigned | 1319_0 | Clustered           | 2 VC_1319_0  | 2   | 0.1187 | 0.95613564 | 0.1135 | 0 | 0 | 0 | 1 Ref      |
| MN311493 | Unassigned | Unassigned | Unassigned | 1299_0 | Clustered           | 53 VC_1299_0 | 53  | 0.8666 | 1          | 0.8666 | 0 | 0 | 0 | 1 Ref      |
| MN313256 | Unassigned | Unassigned | Unassigned | 663_0  | Clustered           | 5 VC_663_0   | 5   | 0.6645 | 0.99999974 | 0.6645 | 0 | 0 | 0 | 1 Ref      |
| MN316588 | Unassigned | Unassigned | Unassigned | 198_14 | Clustered           | 3 VC_198_14  | 3   | 0.0142 | 0.99685589 | 0.0142 | 0 | 0 | 0 | 0.6667 Ref |
| MN317029 | Unassigned | Unassigned | Unassigned | 617_0  | Clustered           | 6 VC_617_0   | 6   | 0.1792 | 1          | 0.1792 | 0 | 0 | 0 | 1 Ref      |
| MN329673 | Unassigned | Unassigned | Unassigned | 1136_0 | Clustered           | 40 VC_1136_0 | 40  | 0.8746 | 1          | 0.8746 | 0 | 0 | 0 | 1 Ref      |
| MN329674 | Unassigned | Unassigned | Unassigned | 973_0  | Clustered           | 15 VC_973_0  | 15  | 1      | 0          | 0      | 0 | 0 | 0 | 1 Ref      |
| MN329675 | Unassigned | Unassigned | Unassigned | 1287_0 | Clustered           | 44 VC_1287_0 | 44  | 1      | 1          | 1      | 0 | 0 | 0 | 1 Ref      |
| MN329676 | Unassigned | Unassigned | Unassigned | 973_0  | Clustered           | 15 VC_973_0  | 15  | 1      | 0          | 0      | 0 | 0 | 0 | 1 Ref      |
| MN329677 | Unassigned | Unassigned | Unassigned | 1136_0 | Clustered           | 40 VC_1136_0 | 40  | 0.8746 | 1          | 0.8746 | 0 | 0 | 0 | 1 Ref      |
| MN329678 | Unassigned | Unassigned | Unassigned | 787_0  | Clustered           | 132 VC_787_0 | 132 | 1      | 1          | 1      | 0 | 0 | 0 | 1 Ref      |
| MN329679 | Unassigned | Unassigned | Unassigned | 1407_0 | Clustered           | 78 VC_1407_0 | 78  | 0.9731 | 1          | 0.9731 | 0 | 0 | 0 | 1 Ref      |
| MN334766 | Unassigned | Unassigned | Unassigned | 506_2  | Clustered           | 2 VC_506_2   | 2   | 0.0324 | 0.95511082 | 0.031  | 0 | 0 | 0 | 1 Ref      |
| MN335248 | Unassigned | Unassigned | Unassigned | 183_0  | Clustered           | 5 VC_183_0   | 5   | 0.7449 | 0.99885646 | 0.744  | 0 | 0 | 0 | 1 Ref      |
| MN336261 | Unassigned | Unassigned | Unassigned | 155_8  | Clustered           | 66 VC_155_8  | 66  | 0.4537 | 1          | 0.4537 | 0 | 0 | 0 | 0.8182 Ref |
| MN336262 | Unassigned | Unassigned | Unassigned | 155_8  | Clustered           | 66 VC_155_8  | 66  | 0.4537 | 1          | 0.4537 | 0 | 0 | 0 | 0.8182 Ref |
| MN336263 | Unassigned | Unassigned | Unassigned | 155_8  | Clustered           | 66 VC_155_8  | 66  | 0.4537 | 1          | 0.4537 | 0 | 0 | 0 | 0.8182 Ref |
| MN336264 | Unassigned | Unassigned | Unassigned | 654_0  | Clustered           | 115 VC_654_0 | 115 | 0.7303 | 1          | 0.7303 | 0 | 0 | 0 | 0.8764 Ref |
| MN336265 | Unassigned | Unassigned | Unassigned | 654_0  | Clustered           | 115 VC_654_0 | 115 | 0.7303 | 1          | 0.7303 | 0 | 0 | 0 | 0.8764 Ref |
| MN336266 | Unassigned | Unassigned | Unassigned | 654_0  | Clustered           | 115 VC_654_0 | 115 | 0.7303 | 1          | 0.7303 | 0 | 0 | 0 | 0.8764 Ref |
| MN337573 | Unassigned | Unassigned | Unassigned | 595_0  | Clustered           | 35 VC_595_0  | 35  | 0.8809 | 1          | 0.8809 | 0 | 0 | 0 | 1 Ref      |
| MN337887 | Unassigned | Unassigned | Unassigned | 706_0  | Clustered           | 52 VC_706_0  | 52  | 0.9787 | 1          | 0.9787 | 0 | 0 | 0 | 1 Ref      |
| MN340231 | Unassigned | Unassigned | Unassigned | 32_1   | Clustered           | 16 VC_32_1   | 16  | 0.1962 | 1          | 0.1962 | 0 | 0 | 0 | 0.8333 Ref |
| MN342150 | Unassigned | Unassigned | Unassigned | 135_22 | Clustered           | 13 VC_135_22 | 13  | 0.0795 | 1          | 0.0795 | 0 | 0 | 0 | 0.8205 Ref |
| MN342151 | Unassigned | Unassigned | Unassigned | 341_0  | Clustered           | 27 VC_341_0  | 27  | 0.5058 | 1          | 0.5058 | 0 | 0 | 0 | 0.8661 Ref |
| MN342247 | Unassigned | Unassigned | Unassigned | 595_0  | Clustered           | 35 VC_595_0  | 35  | 0.8809 | 1          | 0.8809 | 0 | 0 | 0 | 1 Ref      |
| MN346464 | Unassigned | Unassigned | Unassigned | 195_4  | Clustered/Singleton | 1 VC_195_4   | 1   | 0      | 1          | 0      | 0 | 0 | 0 | 1 Ref      |
| MN369737 | Unassigned | Unassigned | Unassigned | 1296_0 | Clustered           | 82 VC_1296_0 | 82  | 0.7938 | 1          | 0.7938 | 0 | 0 | 0 | 1 Ref      |
| MN369738 | Unassigned | Unassigned | Unassigned | 384_14 | Clustered/Singleton | 1 VC_384_14  | 1   | 0      | 1          | 0      | 0 | 0 | 0 | 1 Ref      |
| MN369739 | Unassigned | Unassigned | Unassigned | 538_17 | Clustered/Singleton | 1 VC_538_17  | 1   | 0      | 1          | 0      | 0 | 0 | 0 | 1 Ref      |
| MN369740 | Unassigned | Unassigned | Unassigned | 1217_0 | Clustered           | 41 VC_1217_0 | 41  | 0.9546 | 1          | 0.9546 | 0 | 0 | 0 | 0.9976 Ref |
| MN369741 | Unassigned | Unassigned | Unassigned | 232_0  | Clustered           | 32 VC_232_0  | 32  | 0.8471 | 1          | 0.8471 | 0 | 0 | 0 | 0.996 Ref  |
| MN369742 | Unassigned | Unassigned | Unassigned | 243_0  | Clustered           | 72 VC_243_0  | 72  | 0.8089 | 1          | 0.8089 | 0 | 0 | 0 | 1 Ref      |
| MN369743 | Unassigned | Unassigned | Unassigned | 1114_3 | Clustered           | 16 VC_1114_3 | 16  | 0.2336 | 1          | 0.2336 | 0 | 0 | 0 | 0.9667 Ref |
| MN369744 | Unassigned | Unassigned | Unassigned | 384_11 | Clustered           | 31 VC_384_11 | 31  | 0.0926 | 1          | 0.0926 | 0 | 0 | 0 | 0.7011 Ref |
| MN369745 | Unassigned | Unassigned | Unassigned | 1407_0 | Clustered           | 78 VC_1407_0 | 78  | 0.9731 | 1          | 0.9731 | 0 | 0 | 0 | 1 Ref      |
| MN369746 | Unassigned | Unassigned | Unassigned | 243_0  | Clustered           | 72 VC_243_0  | 72  | 0.8089 | 1          | 0.8089 | 0 | 0 | 0 | 1 Ref      |
| MN369747 | Unassigned | Unassigned | Unassigned | 1424_0 | Clustered           | 31 VC_1424_0 | 31  | 0.8834 | 1          | 0.8834 | 0 | 0 | 0 | 1 Ref      |
| MN369748 | Unassigned | Unassigned | Unassigned | 223_0  | Clustered           | 4 VC_223_0   | 4   | 0.0478 | 0.9999878  | 0.0478 | 0 | 0 | 0 | 1 Ref      |
| MN369749 | Unassigned | Unassigned | Unassigned | 538_19 | Clustered           | 2 VC_538_19  | 2   | 0.0097 | 0.95761552 | 0.0093 | 0 | 0 | 0 | 1 Ref      |
| MN369750 | Unassigned | Unassigned | Unassigned | 1114_0 | Clustered           | 20 VC_1114_0 | 20  | 0.3238 | 1          | 0.3238 | 0 | 0 | 0 | 0.9842 Ref |
| MN369751 | Unassigned | Unassigned | Unassigned | 538_85 | Clustered           | 2 VC_538_85  | 2   | 0.0146 | 0.95762405 | 0.014  | 0 | 0 | 0 | 1 Ref      |
| MN369752 | Unassigned | Unassigned | Unassigned | 538_10 | Clustered/Singleton | 1 VC_538_10  | 1   | 0      | 1          | 0      | 0 | 0 | 0 | 1 Ref      |
| MN369753 | Unassigned | Unassigned | Unassigned | 789_0  | Clustered           | 34 VC_789_0  | 34  | 0.9167 | 1          | 0.9167 | 0 | 0 | 0 | 1 Ref      |
| MN369754 | Unassigned | Unassigned | Unassigned | 1115_4 | Clustered           | 4 VC_1115_4  | 4   | 0.0733 | 0.99956559 | 0.0732 | 0 | 0 | 0 | 1 Ref      |
| MN369755 | Unassigned | Unassigned | Unassigned | 538_33 | Clustered           | 2 VC_538_33  | 2   | 0.0087 | 0.95761754 | 0.0083 | 0 | 0 | 0 | 1 Ref      |
| MN369756 | Unassigned | Unassigned | Unassigned | 231_0  | Clustered           | 19 VC_231_0  | 19  | 0.9378 | 1          | 0.9378 | 0 | 0 | 0 | 1 Ref      |
| MN369757 | Unassigned | Unassigned | Unassigned | 1114_0 | Clustered           | 20 VC_1114_0 | 20  | 0.3238 | 1          | 0.3238 | 0 | 0 | 0 | 0.9842 Ref |
| MN369758 | Unassigned | Unassigned | Unassigned | 528_0  | Clustered           | 12 VC_528_0  | 12  | 0.3923 | 1          | 0.3923 | 0 | 0 | 0 | 0.9697 Ref |
| MN369759 | Unassigned | Unassigned | Unassigned | 385_0  | Clustered           | 24 VC_385_0  | 24  | 0.5516 | 1          | 0.5516 | 0 | 0 | 0 | 1 Ref      |
| MN369760 | Unassigned | Unassigned | Unassigned | 335_50 | Clustered           | 2 VC_335_50  | 2   | 0.0043 | 0.95751115 | 0.0041 | 0 | 0 | 0 | 1 Ref      |
| MN369761 | Unassigned | Unassigned | Unassigned | 241_0  | Clustered           | 21 VC_241_0  | 21  | 0.8342 | 1          | 0.8342 | 0 | 0 | 0 | 1 Ref      |
| MN369762 | Unassigned | Unassigned | Unassigned | 244_2  | Clustered           | 11 VC_244_2  | 11  | 0.1403 | 1          | 0.1403 | 0 | 0 | 0 | 0.9818 Ref |
| MN369763 | Unassigned | Unassigned | Unassigned | 232_0  | Clustered           | 32 VC_232_0  | 32  | 0.8471 | 1          | 0.8471 | 0 | 0 | 0 | 0.996 Ref  |
| MN369764 | Unassigned | Unassigned | Unassigned | 232_0  | Clustered           | 32 VC_232_0  | 32  | 0.8471 | 1          | 0.8471 | 0 | 0 | 0 | 0.996 Ref  |
| MN369765 | Unassigned | Unassigned | Unassigned | 1202_0 | Clustered           | 10 VC_1202_0 | 10  | 0.5679 | 1          | 0.5679 | 0 | 0 | 0 | 1 Ref      |
| MN369766 | Unassigned | Unassigned | Unassigned | 789_0  | Clustered           | 34 VC_789_0  | 34  | 0.9167 | 1          | 0.9167 | 0 | 0 | 0 | 1 Ref      |
| MN379460 | Unassigned | Unassigned | Unassigned | 123_0  | Clustered           | 4 VC_123_0   | 4   | 0.1802 | 0.99998531 | 0.1802 | 0 | 0 | 0 | 1 Ref      |
| MN379629 | Unassigned | Unassigned | Unassigned | 1473_0 | Clustered           | 2 VC_1473_0  | 2   | 1      | 1          | 1      | 0 | 0 | 0 | 1 Ref      |



|          |            |            |            |        |                     |              |     |        |            |        |   |   |   |            |
|----------|------------|------------|------------|--------|---------------------|--------------|-----|--------|------------|--------|---|---|---|------------|
| MN379630 | Unassigned | Unassigned | Unassigned | 1165_0 | Clustered           | 10 VC_1165_0 | 10  | 0.9263 | 1          | 0.9263 | 0 | 0 | 0 | 1 Ref      |
| MN379632 | Unassigned | Unassigned | Unassigned | 1123_0 | Clustered/Singleton | 1 VC_1123_0  | 1   | 0      | 1          | 0      | 0 | 0 | 0 | 1 Ref      |
| MN379633 | Unassigned | Unassigned | Unassigned | 1095_0 | Clustered           | 12 VC_1095_0 | 12  | 0.2819 | 0.99837092 | 0.2814 | 0 | 0 | 0 | 1 Ref      |
| MN379636 | Unassigned | Unassigned | Unassigned | 1473_0 | Clustered           | 2 VC_1473_0  | 2   | 1      | 1          | 1      | 0 | 0 | 0 | 1 Ref      |
| MN379637 | Unassigned | Unassigned | Unassigned | 1286_0 | Clustered           | 16 VC_1286_0 | 16  | 0.9448 | 1          | 0.9448 | 0 | 0 | 0 | 1 Ref      |
| MN379638 | Unassigned | Unassigned | Unassigned | 1335_0 | Clustered           | 13 VC_1335_0 | 13  | 0.7519 | 1          | 0.7519 | 0 | 0 | 0 | 1 Ref      |
| MN379639 | Unassigned | Unassigned | Unassigned | 1474_0 | Clustered           | 2 VC_1474_0  | 2   | 1      | 1          | 1      | 0 | 0 | 0 | 1 Ref      |
| MN379640 | Unassigned | Unassigned | Unassigned | 1165_0 | Clustered           | 10 VC_1165_0 | 10  | 0.9263 | 1          | 0.9263 | 0 | 0 | 0 | 1 Ref      |
| MN379641 | Unassigned | Unassigned | Unassigned | 1193_0 | Clustered           | 2 VC_1193_0  | 2   | 0.0731 | 0.80562642 | 0.0589 | 0 | 0 | 0 | 1 Ref      |
| MN379643 | Unassigned | Unassigned | Unassigned | 1475_0 | Clustered           | 2 VC_1475_0  | 2   | 1      | 1          | 1      | 0 | 0 | 0 | 1 Ref      |
| MN379645 | Unassigned | Unassigned | Unassigned | 1333_0 | Clustered           | 4 VC_1333_0  | 4   | 1      | 1          | 1      | 0 | 0 | 0 | 1 Ref      |
| MN379646 | Unassigned | Unassigned | Unassigned | 1474_0 | Clustered           | 2 VC_1474_0  | 2   | 1      | 1          | 1      | 0 | 0 | 0 | 1 Ref      |
| MN379647 | Unassigned | Unassigned | Unassigned | 1286_0 | Clustered           | 16 VC_1286_0 | 16  | 0.9448 | 1          | 0.9448 | 0 | 0 | 0 | 1 Ref      |
| MN379650 | Unassigned | Unassigned | Unassigned | 1475_0 | Clustered           | 2 VC_1475_0  | 2   | 1      | 1          | 1      | 0 | 0 | 0 | 1 Ref      |
| MN379651 | Unassigned | Unassigned | Unassigned | 1095_0 | Clustered           | 12 VC_1095_0 | 12  | 0.2819 | 0.99837092 | 0.2814 | 0 | 0 | 0 | 1 Ref      |
| MN379739 | Unassigned | Unassigned | Unassigned | 199_16 | Clustered           | 12 VC_199_16 | 12  | 0.064  | 1          | 0.064  | 0 | 0 | 0 | 0.9394 Ref |
| MN379740 | Unassigned | Unassigned | Unassigned | 440_0  | Clustered           | 33 VC_440_0  | 33  | 0.992  | 1          | 0.992  | 0 | 0 | 0 | 1 Ref      |
| MN379832 | Unassigned | Unassigned | Unassigned | 972_0  | Clustered           | 99 VC_972_0  | 99  | 0.9113 | 1          | 0.9113 | 0 | 0 | 0 | 0.9928 Ref |
| MN380459 | Unassigned | Unassigned | Unassigned | 113_0  | Clustered           | 91 VC_113_0  | 91  | 0.9584 | 1          | 0.9584 | 0 | 0 | 0 | 1 Ref      |
| MN384978 | Unassigned | Unassigned | Unassigned | 466_0  | Clustered           | 66 VC_466_0  | 66  | 0.9246 | 1          | 0.9246 | 0 | 0 | 0 | 1 Ref      |
| MN384979 | Unassigned | Unassigned | Unassigned | 135_9  | Clustered           | 3 VC_135_9   | 3   | 0.0098 | 0.98303301 | 0.0097 | 0 | 0 | 0 | 1 Ref      |
| MN385565 | Unassigned | Unassigned | Unassigned | 310_0  | Clustered           | 155 VC_310_0 | 155 | 0.9979 | 1          | 0.9979 | 0 | 0 | 0 | 1 Ref      |
| MN393078 | Unassigned | Unassigned | Unassigned | 654_0  | Clustered           | 115 VC_654_0 | 115 | 0.7303 | 1          | 0.7303 | 0 | 0 | 0 | 0.8764 Ref |
| MN393079 | Unassigned | Unassigned | Unassigned | 560_0  | Clustered           | 15 VC_560_0  | 15  | 0.2846 | 1          | 0.2846 | 0 | 0 | 0 | 1 Ref      |
| MN393473 | Unassigned | Unassigned | Unassigned | 595_0  | Clustered           | 35 VC_595_0  | 35  | 0.8809 | 1          | 0.8809 | 0 | 0 | 0 | 1 Ref      |
| MN395285 | Unassigned | Unassigned | Unassigned | 972_0  | Clustered           | 99 VC_972_0  | 99  | 0.9113 | 1          | 0.9113 | 0 | 0 | 0 | 0.9928 Ref |
| MN395286 | Unassigned | Unassigned | Unassigned | 972_0  | Clustered           | 99 VC_972_0  | 99  | 0.9113 | 1          | 0.9113 | 0 | 0 | 0 | 0.9928 Ref |
| MN395291 | Unassigned | Unassigned | Unassigned | 714_0  | Clustered           | 71 VC_714_0  | 71  | 0.935  | 1          | 0.935  | 0 | 0 | 0 | 1 Ref      |
| MN402506 | Unassigned | Unassigned | Unassigned | 513_1  | Clustered           | 41 VC_513_1  | 41  | 0.3276 | 1          | 0.3276 | 0 | 0 | 0 | 0.911 Ref  |
| MN414250 | Unassigned | Unassigned | Unassigned | 465_0  | Clustered           | 80 VC_465_0  | 80  | 0.9988 | 1          | 0.9988 | 0 | 0 | 0 | 1 Ref      |
| MN417334 | Unassigned | Unassigned | Unassigned | 1060_0 | Clustered           | 4 VC_1060_0  | 4   | 0.875  | 0.99993415 | 0.8749 | 0 | 0 | 0 | 1 Ref      |
| MN419153 | Unassigned | Unassigned | Unassigned | 513_0  | Clustered           | 39 VC_513_0  | 39  | 0.3078 | 1          | 0.3078 | 0 | 0 | 0 | 1 Ref      |
| MN428049 | Unassigned | Unassigned | Unassigned | 526_0  | Clustered           | 32 VC_526_0  | 32  | 0.9037 | 1          | 0.9037 | 0 | 0 | 0 | 1 Ref      |
| MN428050 | Unassigned | Unassigned | Unassigned | 385_0  | Clustered           | 24 VC_385_0  | 24  | 0.5516 | 1          | 0.5516 | 0 | 0 | 0 | 1 Ref      |
| MN428051 | Unassigned | Unassigned | Unassigned | 538_92 | Clustered           | 5 VC_538_92  | 5   | 0.0653 | 0.99999997 | 0.0653 | 0 | 0 | 0 | 1 Ref      |
| MN428052 | Unassigned | Unassigned | Unassigned | 577_0  | Clustered           | 21 VC_577_0  | 21  | 0.9908 | 1          | 0.9908 | 0 | 0 | 0 | 1 Ref      |
| MN428053 | Unassigned | Unassigned | Unassigned | 540_1  | Clustered           | 5 VC_540_1   | 5   | 0.1012 | 0.99999997 | 0.1012 | 0 | 0 | 0 | 0.8 Ref    |
| MN428054 | Unassigned | Unassigned | Unassigned | 335_49 | Clustered           | 17 VC_335_49 | 17  | 0.0731 | 1          | 0.0731 | 0 | 0 | 0 | 0.7721 Ref |
| MN428056 | Unassigned | Unassigned | Unassigned | 973_0  | Clustered           | 15 VC_973_0  | 15  | 1      | 0          | 0      | 0 | 0 | 0 | 1 Ref      |
| MN428058 | Unassigned | Unassigned | Unassigned | 577_0  | Clustered           | 21 VC_577_0  | 21  | 0.9908 | 1          | 0.9908 | 0 | 0 | 0 | 1 Ref      |
| MN428059 | Unassigned | Unassigned | Unassigned | 571_6  | Clustered           | 22 VC_571_6  | 22  | 0.1207 | 1          | 0.1207 | 0 | 0 | 0 | 0.8095 Ref |
| MN428060 | Unassigned | Unassigned | Unassigned | 1114_0 | Clustered           | 20 VC_1114_0 | 20  | 0.3238 | 1          | 0.3238 | 0 | 0 | 0 | 0.9842 Ref |
| MN428061 | Unassigned | Unassigned | Unassigned | 973_0  | Clustered           | 15 VC_973_0  | 15  | 1      | 0          | 0      | 0 | 0 | 0 | 1 Ref      |
| MN428062 | Unassigned | Unassigned | Unassigned | 1407_0 | Clustered           | 78 VC_1407_0 | 78  | 0.9731 | 1          | 0.9731 | 0 | 0 | 0 | 1 Ref      |
| MN428063 | Unassigned | Unassigned | Unassigned | 789_0  | Clustered           | 34 VC_789_0  | 34  | 0.9167 | 1          | 0.9167 | 0 | 0 | 0 | 1 Ref      |
| MN428064 | Unassigned | Unassigned | Unassigned | 1407_0 | Clustered           | 78 VC_1407_0 | 78  | 0.9731 | 1          | 0.9731 | 0 | 0 | 0 | 1 Ref      |
| MN428065 | Unassigned | Unassigned | Unassigned | 579_38 | Clustered           | 2 VC_579_38  | 2   | 0.0032 | 0.6354382  | 0.002  | 0 | 0 | 0 | 1 Ref      |
| MN428066 | Unassigned | Unassigned | Unassigned | 579_20 | Clustered           | 17 VC_579_20 | 17  | 0.0538 | 1          | 0.0538 | 0 | 0 | 0 | 0.9926 Ref |
| MN432485 | Unassigned | Unassigned | Unassigned | 975_0  | Clustered           | 40 VC_975_0  | 40  | 0.6888 | 1          | 0.6888 | 0 | 0 | 0 | 1 Ref      |
| MN433707 | Unassigned | Unassigned | Unassigned | 714_0  | Clustered           | 71 VC_714_0  | 71  | 0.935  | 1          | 0.935  | 0 | 0 | 0 | 1 Ref      |
| MN434093 | Unassigned | Unassigned | Unassigned | 848_0  | Clustered           | 124 VC_848_0 | 124 | 0.9484 | 1          | 0.9484 | 0 | 0 | 0 | 1 Ref      |
| MN434094 | Unassigned | Unassigned | Unassigned | 200_0  | Clustered           | 15 VC_200_0  | 15  | 0.5004 | 1          | 0.5004 | 0 | 0 | 0 | 1 Ref      |
| MN434095 | Unassigned | Unassigned | Unassigned | 509_0  | Clustered           | 36 VC_509_0  | 36  | 0.5291 | 1          | 0.5291 | 0 | 0 | 0 | 0.9714 Ref |
| MN434096 | Unassigned | Unassigned | Unassigned | 200_0  | Clustered           | 15 VC_200_0  | 15  | 0.5004 | 1          | 0.5004 | 0 | 0 | 0 | 1 Ref      |
| MN444868 | Unassigned | Unassigned | Unassigned | 384_3  | Clustered           | 22 VC_384_3  | 22  | 0.0786 | 1          | 0.0786 | 0 | 0 | 0 | 0.9048 Ref |
| MN444869 | Unassigned | Unassigned | Unassigned | 335_6  | Clustered/Singleton | 1 VC_335_6   | 1   | 0      | 1          | 0      | 0 | 0 | 0 | 1 Ref      |
| MN444870 | Unassigned | Unassigned | Unassigned | 919_1  | Clustered           | 4 VC_919_1   | 4   | 0.4515 | 0.99998463 | 0.4515 | 0 | 0 | 0 | 1 Ref      |
| MN444871 | Unassigned | Unassigned | Unassigned | 952_0  | Clustered           | 39 VC_952_0  | 39  | 0.9064 | 1          | 0.9064 | 0 | 0 | 0 | 1 Ref      |
| MN444872 | Unassigned | Unassigned | Unassigned | 527_0  | Clustered           | 37 VC_527_0  | 37  | 0.9679 | 1          | 0.9679 | 0 | 0 | 0 | 1 Ref      |
| MN444873 | Unassigned | Unassigned | Unassigned | 527_0  | Clustered           | 37 VC_527_0  | 37  | 0.9679 | 1          | 0.9679 | 0 | 0 | 0 | 1 Ref      |
| MN444874 | Unassigned | Unassigned | Unassigned | 895_0  | Clustered           | 25 VC_895_0  | 25  | 0.5768 | 1          | 0.5768 | 0 | 0 | 0 | 1 Ref      |
| MN444875 | Unassigned | Unassigned | Unassigned | 783_0  | Clustered           | 67 VC_783_0  | 67  | 0.8945 | 1          | 0.8945 | 0 | 0 | 0 | 1 Ref      |
| MN444876 | Unassigned | Unassigned | Unassigned | 1114_4 | Clustered/Singleton | 1 VC_1114_4  | 1   | 0      | 1          | 0      | 0 | 0 | 0 | 1 Ref      |
| MN444877 | Unassigned | Unassigned | Unassigned | 1415_0 | Clustered           | 31 VC_1415_0 | 31  | 0.8456 | 1          | 0.8456 | 0 | 0 | 0 | 1 Ref      |
| MN444878 | Unassigned | Unassigned | Unassigned | 952_0  | Clustered           | 39 VC_952_0  | 39  | 0.9064 | 1          | 0.9064 | 0 | 0 | 0 | 1 Ref      |
| MN445182 | Unassigned | Unassigned | Unassigned | 198_34 | Clustered/Singleton | 1 VC_198_34  | 1   | 0      | 1          | 0      | 0 | 0 | 0 | 1 Ref      |
| MN445183 | Unassigned | Unassigned | Unassigned | 507_0  | Clustered           | 3 VC_507_0   | 3   | 0.0676 | 0.98259158 | 0.0664 | 0 | 0 | 0 | 1 Ref      |
| MN445184 | Unassigned | Unassigned | Unassigned | 135_42 | Clustered/Singleton | 1 VC_135_42  | 1   | 0      | 1          | 0      | 0 | 0 | 0 | 1 Ref      |
| MN445185 | Unassigned | Unassigned | Unassigned | 994_5  | Clustered           | 19 VC_994_5  | 19  | 0.2622 | 1          | 0.2622 | 0 | 0 | 0 | 1 Ref      |
| MN450150 | Unassigned | Unassigned | Unassigned | 400_0  | Clustered           | 3 VC_400_0   | 3   | 0.0419 | 0.99861633 | 0.0418 | 0 | 0 | 0 | 1 Ref      |
| MN453779 | Unassigned | Unassigned | Unassigned | 456_3  | Clustered           | 3 VC_456_3   | 3   | 0.0523 | 0.99675181 | 0.0521 | 0 | 0 | 0 | 1 Ref      |
| MN461279 | Unassigned | Unassigned | Unassigned | 377_0  | Clustered           | 16 VC_377_0  | 16  | 0.6424 | 1          | 0.6424 | 0 | 0 | 0 | 1 Ref      |
| MN478375 | Unassigned | Unassigned | Unassigned | 75_0   | Clustered           | 15 VC_75_0   | 15  | 0.518  | 1          | 0.518  | 0 | 0 | 0 | 1 Ref      |
| MN478377 | Unassigned | Unassigned | Unassigned | 200_2  | Clustered/Singleton | 1 VC_200_2   | 1   | 0      | 1          | 0      | 0 | 0 | 0 | 1 Ref      |
| MN478483 | Unassigned | Unassigned | Unassigned | 134_2  | Clustered           | 17 VC_134_2  | 17  | 0.1715 | 1          | 0.1715 | 0 | 0 | 0 | 0.9853 Ref |
| MN481365 | Unassigned | Unassigned | Unassigned | 405_0  | Clustered           | 126 VC_405_0 | 126 | 0.9614 | 1          | 0.9614 | 0 | 0 | 0 | 1 Ref      |
| MN481366 | Unassigned | Unassigned | Unassigned | 405_0  | Clustered           | 126 VC_405_0 | 126 | 0.9614 | 1          | 0.9614 | 0 | 0 | 0 | 1 Ref      |
| MN481367 | Unassigned | Unassigned | Unassigned | 340_11 | Clustered           | 15 VC_340_11 | 15  | 0.079  | 1          | 0.079  | 0 | 0 | 0 | 0.9333 Ref |
| MN484599 | Unassigned | Unassigned | Unassigned | 1114_0 | Clustered           | 20 VC_1114_0 | 20  | 0.3238 | 1          | 0.3238 | 0 | 0 | 0 | 0.9842 Ref |
| MN484600 | Unassigned | Unassigned | Unassigned | 1207_0 | Clustered           | 20 VC_1207_0 | 20  | 0.9898 | 1          | 0.9898 | 0 | 0 | 0 | 1 Ref      |
| MN484601 | Unassigned | Unassigned | Unassigned | 1141_0 | Clustered           | 4 VC_1141_0  | 4   | 0.5416 | 0.99996462 | 0.5416 | 0 | 0 | 0 | 1 Ref      |



|          |            |            |            |         |                     |              |     |        |            |        |   |   |   |            |
|----------|------------|------------|------------|---------|---------------------|--------------|-----|--------|------------|--------|---|---|---|------------|
| MN496305 | Unassigned | Unassigned | Unassigned | 618_0   | Clustered           | 50 VC_618_0  | 50  | 0.9989 | 1          | 0.9989 | 0 | 0 | 0 | 1 Ref      |
| MN496306 | Unassigned | Unassigned | Unassigned | 618_0   | Clustered           | 50 VC_618_0  | 50  | 0.9989 | 1          | 0.9989 | 0 | 0 | 0 | 1 Ref      |
| MN496307 | Unassigned | Unassigned | Unassigned | 618_0   | Clustered           | 50 VC_618_0  | 50  | 0.9989 | 1          | 0.9989 | 0 | 0 | 0 | 1 Ref      |
| MN496308 | Unassigned | Unassigned | Unassigned | 618_0   | Clustered           | 50 VC_618_0  | 50  | 0.9989 | 1          | 0.9989 | 0 | 0 | 0 | 1 Ref      |
| MN497953 | Unassigned | Unassigned | Unassigned | 532_0   | Clustered           | 75 VC_532_0  | 75  | 0.9393 | 1          | 0.9393 | 0 | 0 | 0 | 1 Ref      |
| MN497954 | Unassigned | Unassigned | Unassigned | 1406_0  | Clustered           | 21 VC_1406_0 | 21  | 0.9836 | 1          | 0.9836 | 0 | 0 | 0 | 1 Ref      |
| MN504636 | Unassigned | Unassigned | Unassigned | 479_0   | Clustered           | 7 VC_479_0   | 7   | 0.3294 | 1          | 0.3294 | 0 | 0 | 0 | 1 Ref      |
| MN508614 | Unassigned | Unassigned | Unassigned | 290_0   | Clustered           | 2 VC_290_0   | 2   | 0.0025 | 0.94831837 | 0.0023 | 0 | 0 | 0 | 1 Ref      |
| MN508615 | Unassigned | Unassigned | Unassigned | 837_1   | Clustered           | 24 VC_837_1  | 24  | 0.5328 | 1          | 0.5328 | 0 | 0 | 0 | 1 Ref      |
| MN508616 | Unassigned | Unassigned | Unassigned | 290_110 | Clustered           | 2 VC_290_110 | 2   | 0.0026 | 0.90858225 | 0.0024 | 0 | 0 | 0 | 1 Ref      |
| MN508617 | Unassigned | Unassigned | Unassigned | 290_110 | Clustered           | 2 VC_290_110 | 2   | 0.0026 | 0.90858225 | 0.0024 | 0 | 0 | 0 | 1 Ref      |
| MN508618 | Unassigned | Unassigned | Unassigned | 290_0   | Clustered           | 2 VC_290_0   | 2   | 0.0025 | 0.94831837 | 0.0023 | 0 | 0 | 0 | 1 Ref      |
| MN508619 | Unassigned | Unassigned | Unassigned | 486_0   | Clustered           | 47 VC_486_0  | 47  | 0.9022 | 1          | 0.9022 | 0 | 0 | 0 | 1 Ref      |
| MN508620 | Unassigned | Unassigned | Unassigned | 81_0    | Clustered           | 41 VC_81_0   | 41  | 0.5815 | 1          | 0.5815 | 0 | 0 | 0 | 0.9805 Ref |
| MN508621 | Unassigned | Unassigned | Unassigned | 687_0   | Clustered           | 21 VC_687_0  | 21  | 0.3608 | 1          | 0.3608 | 0 | 0 | 0 | 1 Ref      |
| MN508622 | Unassigned | Unassigned | Unassigned | 687_0   | Clustered           | 21 VC_687_0  | 21  | 0.3608 | 1          | 0.3608 | 0 | 0 | 0 | 1 Ref      |
| MN508623 | Unassigned | Unassigned | Unassigned | 687_0   | Clustered           | 21 VC_687_0  | 21  | 0.3608 | 1          | 0.3608 | 0 | 0 | 0 | 1 Ref      |
| MN508624 | Unassigned | Unassigned | Unassigned | 687_0   | Clustered           | 21 VC_687_0  | 21  | 0.3608 | 1          | 0.3608 | 0 | 0 | 0 | 1 Ref      |
| MN508817 | Unassigned | Unassigned | Unassigned | 687_2   | Clustered/Singleton | 1 VC_687_2   | 1   | 0      | 1          | 0      | 0 | 0 | 0 | 1 Ref      |
| MN509793 | Unassigned | Unassigned | Unassigned | 907_0   | Clustered           | 32 VC_907_0  | 32  | 0.9964 | 1          | 0.9964 | 0 | 0 | 0 | 1 Ref      |
| MN510331 | Unassigned | Unassigned | Unassigned | 465_0   | Clustered           | 80 VC_465_0  | 80  | 0.9988 | 1          | 0.9988 | 0 | 0 | 0 | 1 Ref      |
| MN512538 | Unassigned | Unassigned | Unassigned | 366_0   | Clustered           | 4 VC_366_0   | 4   | 0.1731 | 0.99998684 | 0.1731 | 0 | 0 | 0 | 0.8333 Ref |
| MN516421 | Unassigned | Unassigned | Unassigned | 713_0   | Clustered           | 26 VC_713_0  | 26  | 0.9358 | 1          | 0.9358 | 0 | 0 | 0 | 1 Ref      |
| MN516422 | Unassigned | Unassigned | Unassigned | 713_0   | Clustered           | 26 VC_713_0  | 26  | 0.9358 | 1          | 0.9358 | 0 | 0 | 0 | 1 Ref      |
| MN518893 | Unassigned | Unassigned | Unassigned | 465_0   | Clustered           | 80 VC_465_0  | 80  | 0.9988 | 1          | 0.9988 | 0 | 0 | 0 | 1 Ref      |
| MN518894 | Unassigned | Unassigned | Unassigned | 465_0   | Clustered           | 80 VC_465_0  | 80  | 0.9988 | 1          | 0.9988 | 0 | 0 | 0 | 1 Ref      |
| MN528768 | Unassigned | Unassigned | Unassigned | 552_0   | Clustered           | 9 VC_552_0   | 9   | 1      | 1          | 1      | 0 | 0 | 0 | 1 Ref      |
| MN534316 | Unassigned | Unassigned | Unassigned | 266_0   | Clustered           | 13 VC_266_0  | 13  | 0.3622 | 1          | 0.3622 | 0 | 0 | 0 | 1 Ref      |
| MN534317 | Unassigned | Unassigned | Unassigned | 266_0   | Clustered           | 13 VC_266_0  | 13  | 0.3622 | 1          | 0.3622 | 0 | 0 | 0 | 1 Ref      |
| MN534320 | Unassigned | Unassigned | Unassigned | 268_0   | Clustered           | 10 VC_268_0  | 10  | 0.1417 | 1          | 0.1417 | 0 | 0 | 0 | 0.9333 Ref |
| MN536023 | Unassigned | Unassigned | Unassigned | 16_0    | Clustered           | 12 VC_16_0   | 12  | 0.6601 | 1          | 0.6601 | 0 | 0 | 0 | 1 Ref      |
| MN536027 | Unassigned | Unassigned | Unassigned | 192_0   | Clustered           | 22 VC_192_0  | 22  | 0.6582 | 1          | 0.6582 | 0 | 0 | 0 | 1 Ref      |
| MN539736 | Unassigned | Unassigned | Unassigned | 155_8   | Clustered           | 66 VC_155_8  | 66  | 0.4537 | 1          | 0.4537 | 0 | 0 | 0 | 0.8182 Ref |
| MN539737 | Unassigned | Unassigned | Unassigned | 155_8   | Clustered           | 66 VC_155_8  | 66  | 0.4537 | 1          | 0.4537 | 0 | 0 | 0 | 0.8182 Ref |
| MN539738 | Unassigned | Unassigned | Unassigned | 155_8   | Clustered           | 66 VC_155_8  | 66  | 0.4537 | 1          | 0.4537 | 0 | 0 | 0 | 0.8182 Ref |
| MN549360 | Unassigned | Unassigned | Unassigned | 1093_3  | Clustered           | 5 VC_1093_3  | 5   | 0.1846 | 0.98656422 | 0.1822 | 0 | 0 | 0 | 1 Ref      |
| MN549361 | Unassigned | Unassigned | Unassigned | 1093_3  | Clustered           | 5 VC_1093_3  | 5   | 0.1846 | 0.98656422 | 0.1822 | 0 | 0 | 0 | 1 Ref      |
| MN552143 | Unassigned | Unassigned | Unassigned | 824_0   | Clustered           | 3 VC_824_0   | 3   | 0.5034 | 0.9984288  | 0.5026 | 0 | 0 | 0 | 1 Ref      |
| MN552144 | Unassigned | Unassigned | Unassigned | 274_0   | Clustered           | 7 VC_274_0   | 7   | 0.3401 | 1          | 0.3401 | 0 | 0 | 0 | 1 Ref      |
| MN552145 | Unassigned | Unassigned | Unassigned | 488_0   | Clustered           | 14 VC_488_0  | 14  | 0.8516 | 1          | 0.8516 | 0 | 0 | 0 | 1 Ref      |
| MN552146 | Unassigned | Unassigned | Unassigned | 488_0   | Clustered           | 9 VC_488_0   | 9   | 0.5251 | 1          | 0.5251 | 0 | 0 | 0 | 1 Ref      |
| MN552147 | Unassigned | Unassigned | Unassigned | 888_0   | Clustered           | 13 VC_888_0  | 13  | 0.6844 | 1          | 0.6844 | 0 | 0 | 0 | 1 Ref      |
| MN552148 | Unassigned | Unassigned | Unassigned | 889_0   | Clustered           | 105 VC_210_0 | 105 | 0.4076 | 1          | 0.4076 | 0 | 0 | 0 | 0.7766 Ref |
| MN552149 | Unassigned | Unassigned | Unassigned | 210_0   | Clustered           | 105 VC_210_0 | 105 | 0.4076 | 1          | 0.4076 | 0 | 0 | 0 | 0.7766 Ref |
| MN552150 | Unassigned | Unassigned | Unassigned | 210_0   | Clustered           | 105 VC_210_0 | 105 | 0.4076 | 1          | 0.4076 | 0 | 0 | 0 | 0.7766 Ref |
| MN555583 | Unassigned | Unassigned | Unassigned | 862_0   | Clustered           | 29 VC_862_0  | 29  | 0.8594 | 1          | 0.8594 | 0 | 0 | 0 | 1 Ref      |
| MN555584 | Unassigned | Unassigned | Unassigned | 862_0   | Clustered           | 29 VC_862_0  | 29  | 0.8594 | 1          | 0.8594 | 0 | 0 | 0 | 1 Ref      |
| MN555585 | Unassigned | Unassigned | Unassigned | 434_0   | Clustered           | 45 VC_434_0  | 45  | 0.9479 | 1          | 0.9479 | 0 | 0 | 0 | 1 Ref      |
| MN555586 | Unassigned | Unassigned | Unassigned | 486_0   | Clustered           | 47 VC_486_0  | 47  | 0.9022 | 1          | 0.9022 | 0 | 0 | 0 | 1 Ref      |
| MN555587 | Unassigned | Unassigned | Unassigned | 434_0   | Clustered           | 45 VC_434_0  | 45  | 0.9479 | 1          | 0.9479 | 0 | 0 | 0 | 1 Ref      |
| MN555588 | Unassigned | Unassigned | Unassigned | 434_0   | Clustered           | 45 VC_434_0  | 45  | 0.9479 | 1          | 0.9479 | 0 | 0 | 0 | 1 Ref      |
| MN555589 | Unassigned | Unassigned | Unassigned | 434_0   | Clustered           | 45 VC_434_0  | 45  | 0.9479 | 1          | 0.9479 | 0 | 0 | 0 | 1 Ref      |
| MN562749 | Unassigned | Unassigned | Unassigned | 486_0   | Clustered           | 47 VC_486_0  | 47  | 0.9022 | 1          | 0.9022 | 0 | 0 | 0 | 1 Ref      |
| MN563783 | Unassigned | Unassigned | Unassigned | 81_0    | Clustered           | 41 VC_81_0   | 41  | 0.5815 | 1          | 0.5815 | 0 | 0 | 0 | 0.9805 Ref |
| MN563784 | Unassigned | Unassigned | Unassigned | 356_0   | Clustered           | 21 VC_356_0  | 21  | 0.5409 | 1          | 0.5409 | 0 | 0 | 0 | 1 Ref      |
| MN563785 | Unassigned | Unassigned | Unassigned | 77_0    | Clustered           | 37 VC_77_0   | 37  | 0.9392 | 1          | 0.9392 | 0 | 0 | 0 | 1 Ref      |
| MN563793 | Unassigned | Unassigned | Unassigned | 5_0     | Clustered           | 27 VC_5_0    | 27  | 0.9599 | 1          | 0.9599 | 0 | 0 | 0 | 1 Ref      |
| MN564818 | Unassigned | Unassigned | Unassigned | 81_0    | Clustered           | 41 VC_81_0   | 41  | 0.5815 | 1          | 0.5815 | 0 | 0 | 0 | 0.9805 Ref |
| MN580668 | Unassigned | Unassigned | Unassigned | 290_179 | Clustered/Singleton | 1 VC_290_179 | 1   | 0      | 1          | 0      | 0 | 0 | 0 | 1 Ref      |
| MN585130 | Unassigned | Unassigned | Unassigned | 848_0   | Clustered           | 124 VC_848_0 | 124 | 0.9484 | 1          | 0.9484 | 0 | 0 | 0 | 1 Ref      |
| MN585963 | Unassigned | Unassigned | Unassigned | 1217_0  | Clustered           | 41 VC_1217_0 | 41  | 0.9546 | 1          | 0.9546 | 0 | 0 | 0 | 0.9976 Ref |
| MN585964 | Unassigned | Unassigned | Unassigned | 577_0   | Clustered           | 21 VC_577_0  | 21  | 0.9908 | 1          | 0.9908 | 0 | 0 | 0 | 1 Ref      |
| MN585965 | Unassigned | Unassigned | Unassigned | 384_13  | Clustered           | 33 VC_384_13 | 33  | 0.1785 | 1          | 0.1785 | 0 | 0 | 0 | 0.8769 Ref |
| MN585966 | Unassigned | Unassigned | Unassigned | 540_1   | Clustered           | 5 VC_540_1   | 5   | 0.1012 | 0.99999997 | 0.1012 | 0 | 0 | 0 | 0.8 Ref    |
| MN585967 | Unassigned | Unassigned | Unassigned | 384_1   | Clustered           | 11 VC_384_1  | 11  | 0.0378 | 1          | 0.0378 | 0 | 0 | 0 | 0.8545 Ref |
| MN585968 | Unassigned | Unassigned | Unassigned | 223_2   | Clustered           | 2 VC_223_2   | 2   | 0.0138 | 0.95744997 | 0.0132 | 0 | 0 | 0 | 1 Ref      |
| MN585969 | Unassigned | Unassigned | Unassigned | 532_0   | Clustered           | 75 VC_532_0  | 75  | 0.9393 | 1          | 0.9393 | 0 | 0 | 0 | 1 Ref      |
| MN585970 | Unassigned | Unassigned | Unassigned | 335_20  | Clustered/Singleton | 1 VC_335_20  | 1   | 0      | 1          | 0      | 0 | 0 | 0 | 1 Ref      |
| MN585971 | Unassigned | Unassigned | Unassigned | 898_1   | Clustered           | 27 VC_898_1  | 27  | 0.8894 | 1          | 0.8894 | 0 | 0 | 0 | 1 Ref      |
| MN585972 | Unassigned | Unassigned | Unassigned | 1210_0  | Clustered           | 7 VC_1210_0  | 7   | 0.9808 | 0.99995963 | 0.9807 | 0 | 0 | 0 | 1 Ref      |
| MN585973 | Unassigned | Unassigned | Unassigned | 538_31  | Clustered           | 11 VC_538_31 | 11  | 0.0894 | 1          | 0.0894 | 0 | 0 | 0 | 0.6 Ref    |
| MN585974 | Unassigned | Unassigned | Unassigned | 232_0   | Clustered           | 32 VC_232_0  | 32  | 0.8471 | 1          | 0.8471 | 0 | 0 | 0 | 0.996 Ref  |
| MN585975 | Unassigned | Unassigned | Unassigned | 538_89  | Clustered/Singleton | 1 VC_538_89  | 1   | 0      | 1          | 0      | 0 | 0 | 0 | 1 Ref      |
| MN585976 | Unassigned | Unassigned | Unassigned | 335_24  | Clustered           | 3 VC_335_24  | 3   | 0.009  | 0.99853949 | 0.0089 | 0 | 0 | 0 | 1 Ref      |
| MN585977 | Unassigned | Unassigned | Unassigned | 537_0   | Clustered           | 39 VC_537_0  | 39  | 0.8148 | 1          | 0.8148 | 0 | 0 | 0 | 1 Ref      |
| MN585978 | Unassigned | Unassigned | Unassigned | 232_0   | Clustered           | 32 VC_232_0  | 32  | 0.8471 | 1          | 0.8471 | 0 | 0 | 0 | 0.996 Ref  |
| MN585979 | Unassigned | Unassigned | Unassigned | 232_0   | Clustered           | 32 VC_232_0  | 32  | 0.8471 | 1          | 0.8471 | 0 | 0 | 0 | 0.996 Ref  |
| MN585980 | Unassigned | Unassigned | Unassigned | 1415_0  | Clustered           | 31 VC_1415_0 | 31  | 0.8456 | 1          | 0.8456 | 0 | 0 | 0 | 1 Ref      |
| MN585981 | Unassigned | Unassigned | Unassigned | 223_6   | Clustered           | 42 VC_223_6  | 42  | 0.4717 | 1          | 0.4717 | 0 | 0 | 0 | 0.8351 Ref |
| MN585982 | Unassigned | Unassigned | Unassigned | 898_1   | Clustered           | 27 VC_898_1  | 27  | 0.8894 | 1          | 0.8894 | 0 | 0 | 0 | 1 Ref      |
| MN585983 | Unassigned | Unassigned | Unassigned | 223_6   | Clustered           | 42 VC_223_6  | 42  | 0.4717 | 1          | 0.4717 | 0 | 0 | 0 | 0.8351 Ref |



|          |            |            |            |        |                     |              |    |        |            |        |   |   |   |            |
|----------|------------|------------|------------|--------|---------------------|--------------|----|--------|------------|--------|---|---|---|------------|
| MN585984 | Unassigned | Unassigned | Unassigned | 532_0  | Clustered           | 75 VC_532_0  | 75 | 0.9393 | 1          | 0.9393 | 0 | 0 | 0 | 1 Ref      |
| MN585985 | Unassigned | Unassigned | Unassigned | 335_51 | Clustered           | 3 VC_335_51  | 3  | 0.008  | 0.99634936 | 0.008  | 0 | 0 | 0 | 0.6667 Ref |
| MN585986 | Unassigned | Unassigned | Unassigned | 1415_0 | Clustered           | 31 VC_1415_0 | 31 | 0.8456 | 1          | 0.8456 | 0 | 0 | 0 | 1 Ref      |
| MN585987 | Unassigned | Unassigned | Unassigned | 538_59 | Clustered           | 5 VC_538_59  | 5  | 0.0456 | 0.99999997 | 0.0456 | 0 | 0 | 0 | 1 Ref      |
| MN585988 | Unassigned | Unassigned | Unassigned | 898_1  | Clustered           | 27 VC_898_1  | 27 | 0.8894 | 1          | 0.8894 | 0 | 0 | 0 | 1 Ref      |
| MN585989 | Unassigned | Unassigned | Unassigned | 222_0  | Clustered           | 5 VC_222_0   | 5  | 0.072  | 0.99999997 | 0.072  | 0 | 0 | 0 | 1 Ref      |
| MN585990 | Unassigned | Unassigned | Unassigned | 1407_0 | Clustered           | 78 VC_1407_0 | 78 | 0.9731 | 1          | 0.9731 | 0 | 0 | 0 | 1 Ref      |
| MN585991 | Unassigned | Unassigned | Unassigned | 335_53 | Clustered           | 2 VC_335_53  | 2  | 0.0039 | 0.95663826 | 0.0037 | 0 | 0 | 0 | 1 Ref      |
| MN585992 | Unassigned | Unassigned | Unassigned | 786_0  | Clustered           | 4 VC_786_0   | 4  | 0.3519 | 0.99997469 | 0.3519 | 0 | 0 | 0 | 1 Ref      |
| MN585993 | Unassigned | Unassigned | Unassigned | 591_0  | Clustered           | 4 VC_591_0   | 4  | 0.1897 | 0.9999859  | 0.1897 | 0 | 0 | 0 | 1 Ref      |
| MN585994 | Unassigned | Unassigned | Unassigned | 232_0  | Clustered           | 32 VC_232_0  | 32 | 0.8471 | 1          | 0.8471 | 0 | 0 | 0 | 0.996 Ref  |
| MN585995 | Unassigned | Unassigned | Unassigned | 538_11 | Clustered/Singleton | 1 VC_538_11  | 1  | 0      | 1          | 0      | 0 | 0 | 0 | 1 Ref      |
| MN585996 | Unassigned | Unassigned | Unassigned | 898_1  | Clustered           | 27 VC_898_1  | 27 | 0.8894 | 1          | 0.8894 | 0 | 0 | 0 | 1 Ref      |
| MN585997 | Unassigned | Unassigned | Unassigned | 335_31 | Clustered           | 2 VC_335_31  | 2  | 0.0036 | 0.94604798 | 0.0034 | 0 | 0 | 0 | 0 Ref      |
| MN585998 | Unassigned | Unassigned | Unassigned | 223_6  | Clustered           | 42 VC_223_6  | 42 | 0.4717 | 1          | 0.4717 | 0 | 0 | 0 | 0.8351 Ref |
| MN585999 | Unassigned | Unassigned | Unassigned | 335_5  | Clustered           | 11 VC_335_5  | 11 | 0.0469 | 1          | 0.0469 | 0 | 0 | 0 | 0.7636 Ref |
| MN586000 | Unassigned | Unassigned | Unassigned | 335_49 | Clustered           | 17 VC_335_49 | 17 | 0.0731 | 1          | 0.0731 | 0 | 0 | 0 | 0.7721 Ref |
| MN586001 | Unassigned | Unassigned | Unassigned | 538_18 | Clustered/Singleton | 1 VC_538_18  | 1  | 0      | 1          | 0      | 0 | 0 | 0 | 1 Ref      |
| MN586002 | Unassigned | Unassigned | Unassigned | 223_2  | Clustered           | 2 VC_223_2   | 2  | 0.0138 | 0.95744997 | 0.0132 | 0 | 0 | 0 | 1 Ref      |
| MN586003 | Unassigned | Unassigned | Unassigned | 592_0  | Clustered           | 16 VC_592_0  | 16 | 0.7259 | 1          | 0.7259 | 0 | 0 | 0 | 1 Ref      |
| MN586004 | Unassigned | Unassigned | Unassigned | 538_6  | Clustered           | 3 VC_538_6   | 3  | 0.0273 | 0.99859866 | 0.0272 | 0 | 0 | 0 | 1 Ref      |
| MN586005 | Unassigned | Unassigned | Unassigned | 538_59 | Clustered           | 5 VC_538_59  | 5  | 0.0456 | 0.99999997 | 0.0456 | 0 | 0 | 0 | 1 Ref      |
| MN586006 | Unassigned | Unassigned | Unassigned | 228_0  | Clustered           | 22 VC_228_0  | 22 | 0.7411 | 1          | 0.7411 | 0 | 0 | 0 | 1 Ref      |
| MN586007 | Unassigned | Unassigned | Unassigned | 1415_0 | Clustered           | 31 VC_1415_0 | 31 | 0.8456 | 1          | 0.8456 | 0 | 0 | 0 | 1 Ref      |
| MN586008 | Unassigned | Unassigned | Unassigned | 1407_0 | Clustered           | 78 VC_1407_0 | 78 | 0.9731 | 1          | 0.9731 | 0 | 0 | 0 | 1 Ref      |
| MN586009 | Unassigned | Unassigned | Unassigned | 1016_0 | Clustered           | 62 VC_1016_0 | 62 | 0.8638 | 1          | 0.8638 | 0 | 0 | 0 | 0.743 Ref  |
| MN586010 | Unassigned | Unassigned | Unassigned | 1407_0 | Clustered           | 78 VC_1407_0 | 78 | 0.9731 | 1          | 0.9731 | 0 | 0 | 0 | 1 Ref      |
| MN586011 | Unassigned | Unassigned | Unassigned | 538_41 | Clustered           | 2 VC_538_41  | 2  | 0.0138 | 0.95761457 | 0.0132 | 0 | 0 | 0 | 1 Ref      |
| MN586012 | Unassigned | Unassigned | Unassigned | 538_66 | Clustered/Singleton | 1 VC_538_66  | 1  | 0      | 1          | 0      | 0 | 0 | 0 | 1 Ref      |
| MN586013 | Unassigned | Unassigned | Unassigned | 571_0  | Clustered           | 16 VC_571_0  | 16 | 0.091  | 1          | 0.091  | 0 | 0 | 0 | 0.6667 Ref |
| MN586014 | Unassigned | Unassigned | Unassigned | 1225_0 | Clustered           | 6 VC_1225_0  | 6  | 0.9947 | 0.99996974 | 0.9947 | 0 | 0 | 0 | 1 Ref      |
| MN586015 | Unassigned | Unassigned | Unassigned | 952_0  | Clustered           | 39 VC_952_0  | 39 | 0.9064 | 1          | 0.9064 | 0 | 0 | 0 | 1 Ref      |
| MN586016 | Unassigned | Unassigned | Unassigned | 974_0  | Clustered           | 34 VC_974_0  | 34 | 0.7953 | 1          | 0.7953 | 0 | 0 | 0 | 1 Ref      |
| MN586017 | Unassigned | Unassigned | Unassigned | 571_7  | Clustered           | 28 VC_571_7  | 28 | 0.1651 | 1          | 0.1651 | 0 | 0 | 0 | 0.8519 Ref |
| MN586019 | Unassigned | Unassigned | Unassigned | 571_7  | Clustered           | 28 VC_571_7  | 28 | 0.1651 | 1          | 0.1651 | 0 | 0 | 0 | 0.8519 Ref |
| MN586021 | Unassigned | Unassigned | Unassigned | 1211_0 | Clustered           | 3 VC_1211_0  | 3  | 0.3222 | 0.99834213 | 0.3227 | 0 | 0 | 0 | 1 Ref      |
| MN586022 | Unassigned | Unassigned | Unassigned | 1139_0 | Clustered           | 5 VC_1139_0  | 5  | 0.8556 | 0.99869977 | 0.8545 | 0 | 0 | 0 | 1 Ref      |
| MN586024 | Unassigned | Unassigned | Unassigned | 785_1  | Clustered           | 9 VC_785_1   | 9  | 0.3679 | 1          | 0.3679 | 0 | 0 | 0 | 1 Ref      |
| MN586026 | Unassigned | Unassigned | Unassigned | 1138_0 | Clustered           | 16 VC_1138_0 | 16 | 0.4566 | 1          | 0.4566 | 0 | 0 | 0 | 1 Ref      |
| MN586027 | Unassigned | Unassigned | Unassigned | 1426_0 | Clustered           | 2 VC_1426_0  | 2  | 0.8068 | 0.92263554 | 0.7444 | 0 | 0 | 0 | 1 Ref      |
| MN586028 | Unassigned | Unassigned | Unassigned | 1138_0 | Clustered           | 16 VC_1138_0 | 16 | 0.4566 | 1          | 0.4566 | 0 | 0 | 0 | 1 Ref      |
| MN586029 | Unassigned | Unassigned | Unassigned | 566_1  | Clustered           | 2 VC_566_1   | 2  | 0.0136 | 0.68880023 | 0.0093 | 0 | 0 | 0 | 1 Ref      |
| MN586030 | Unassigned | Unassigned | Unassigned | 917_0  | Clustered           | 28 VC_917_0  | 28 | 0.5465 | 1          | 0.5465 | 0 | 0 | 0 | 1 Ref      |
| MN586031 | Unassigned | Unassigned | Unassigned | 1217_0 | Clustered           | 41 VC_1217_0 | 41 | 0.9546 | 1          | 0.9546 | 0 | 0 | 0 | 0.9976 Ref |
| MN586032 | Unassigned | Unassigned | Unassigned | 571_2  | Clustered           | 17 VC_571_2  | 17 | 0.0965 | 1          | 0.0965 | 0 | 0 | 0 | 0.9779 Ref |
| MN586034 | Unassigned | Unassigned | Unassigned | 571_6  | Clustered           | 22 VC_571_6  | 22 | 0.1207 | 1          | 0.1207 | 0 | 0 | 0 | 0.8095 Ref |
| MN586035 | Unassigned | Unassigned | Unassigned | 571_7  | Clustered           | 28 VC_571_7  | 28 | 0.1651 | 1          | 0.1651 | 0 | 0 | 0 | 0.8519 Ref |
| MN586036 | Unassigned | Unassigned | Unassigned | 952_0  | Clustered           | 39 VC_952_0  | 39 | 0.9064 | 1          | 0.9064 | 0 | 0 | 0 | 1 Ref      |
| MN586037 | Unassigned | Unassigned | Unassigned | 571_6  | Clustered           | 22 VC_571_6  | 22 | 0.1207 | 1          | 0.1207 | 0 | 0 | 0 | 0.8095 Ref |
| MN586038 | Unassigned | Unassigned | Unassigned | 533_0  | Clustered           | 16 VC_533_0  | 16 | 0.3765 | 1          | 0.3765 | 0 | 0 | 0 | 1 Ref      |
| MN586039 | Unassigned | Unassigned | Unassigned | 230_0  | Clustered           | 38 VC_230_0  | 38 | 0.9076 | 1          | 0.9076 | 0 | 0 | 0 | 1 Ref      |
| MN586041 | Unassigned | Unassigned | Unassigned | 571_7  | Clustered           | 28 VC_571_7  | 28 | 0.1651 | 1          | 0.1651 | 0 | 0 | 0 | 0.8519 Ref |
| MN586042 | Unassigned | Unassigned | Unassigned | 1415_0 | Clustered           | 31 VC_1415_0 | 31 | 0.8456 | 1          | 0.8456 | 0 | 0 | 0 | 1 Ref      |
| MN586043 | Unassigned | Unassigned | Unassigned | 571_1  | Clustered           | 4 VC_571_1   | 4  | 0.0158 | 0.99966394 | 0.0158 | 0 | 0 | 0 | 0.6667 Ref |
| MN586044 | Unassigned | Unassigned | Unassigned | 571_1  | Clustered           | 4 VC_571_1   | 4  | 0.0158 | 0.99966394 | 0.0158 | 0 | 0 | 0 | 0.6667 Ref |
| MN586045 | Unassigned | Unassigned | Unassigned | 526_0  | Clustered           | 32 VC_526_0  | 32 | 0.9037 | 1          | 0.9037 | 0 | 0 | 0 | 1 Ref      |
| MN586046 | Unassigned | Unassigned | Unassigned | 526_0  | Clustered           | 32 VC_526_0  | 32 | 0.9037 | 1          | 0.9037 | 0 | 0 | 0 | 1 Ref      |
| MN586047 | Unassigned | Unassigned | Unassigned | 1138_0 | Clustered           | 16 VC_1138_0 | 16 | 0.4566 | 1          | 0.4566 | 0 | 0 | 0 | 1 Ref      |
| MN586048 | Unassigned | Unassigned | Unassigned | 532_0  | Clustered           | 75 VC_532_0  | 75 | 0.9393 | 1          | 0.9393 | 0 | 0 | 0 | 1 Ref      |
| MN586049 | Unassigned | Unassigned | Unassigned | 952_0  | Clustered           | 39 VC_952_0  | 39 | 0.9064 | 1          | 0.9064 | 0 | 0 | 0 | 1 Ref      |
| MN586050 | Unassigned | Unassigned | Unassigned | 571_7  | Clustered           | 28 VC_571_7  | 28 | 0.1651 | 1          | 0.1651 | 0 | 0 | 0 | 0.8519 Ref |
| MN586051 | Unassigned | Unassigned | Unassigned | 571_2  | Clustered           | 17 VC_571_2  | 17 | 0.0965 | 1          | 0.0965 | 0 | 0 | 0 | 0.9779 Ref |
| MN586052 | Unassigned | Unassigned | Unassigned | 917_0  | Clustered           | 28 VC_917_0  | 28 | 0.5465 | 1          | 0.5465 | 0 | 0 | 0 | 1 Ref      |
| MN586053 | Unassigned | Unassigned | Unassigned | 1221_0 | Clustered           | 3 VC_1221_0  | 3  | 0.7566 | 0.96819872 | 0.7326 | 0 | 0 | 0 | 1 Ref      |
| MN586054 | Unassigned | Unassigned | Unassigned | 901_0  | Clustered           | 31 VC_901_0  | 31 | 0.8235 | 1          | 0.8235 | 0 | 0 | 0 | 0.8194 Ref |
| MN586055 | Unassigned | Unassigned | Unassigned | 1216_0 | Clustered           | 22 VC_1216_0 | 22 | 0.4546 | 1          | 0.4546 | 0 | 0 | 0 | 1 Ref      |
| MN586056 | Unassigned | Unassigned | Unassigned | 901_0  | Clustered           | 31 VC_901_0  | 31 | 0.8235 | 1          | 0.8235 | 0 | 0 | 0 | 0.8194 Ref |
| MN586057 | Unassigned | Unassigned | Unassigned | 952_0  | Clustered           | 39 VC_952_0  | 39 | 0.9064 | 1          | 0.9064 | 0 | 0 | 0 | 1 Ref      |
| MN586058 | Unassigned | Unassigned | Unassigned | 384_1  | Clustered           | 11 VC_384_1  | 11 | 0.0378 | 1          | 0.0378 | 0 | 0 | 0 | 0.8545 Ref |
| MN586059 | Unassigned | Unassigned | Unassigned | 1415_0 | Clustered           | 31 VC_1415_0 | 31 | 0.8456 | 1          | 0.8456 | 0 | 0 | 0 | 1 Ref      |
| MN586060 | Unassigned | Unassigned | Unassigned | 974_0  | Clustered           | 34 VC_974_0  | 34 | 0.7953 | 1          | 0.7953 | 0 | 0 | 0 | 1 Ref      |
| MN586061 | Unassigned | Unassigned | Unassigned | 1200_0 | Clustered           | 73 VC_1200_0 | 73 | 0.9825 | 1          | 0.9825 | 0 | 0 | 0 | 1 Ref      |
| MN586062 | Unassigned | Unassigned | Unassigned | 974_0  | Clustered           | 34 VC_974_0  | 34 | 0.7953 | 1          | 0.7953 | 0 | 0 | 0 | 1 Ref      |
| MN586063 | Unassigned | Unassigned | Unassigned | 531_0  | Clustered           | 32 VC_531_0  | 32 | 0.6859 | 1          | 0.6859 | 0 | 0 | 0 | 1 Ref      |
| MN592896 | Unassigned | Unassigned | Unassigned | 958_0  | Clustered           | 3 VC_958_0   | 3  | 0.2752 | 0.95138727 | 0.2618 | 0 | 0 | 0 | 1 Ref      |
| MN592897 | Unassigned | Unassigned | Unassigned | 303_0  | Clustered           | 6 VC_303_0   | 6  | 0.5341 | 1          | 0.5341 | 0 | 0 | 0 | 1 Ref      |
| MN602045 | Unassigned | Unassigned | Unassigned | 434_0  | Clustered           | 45 VC_434_0  | 45 | 0.9479 | 1          | 0.9479 | 0 | 0 | 0 | 1 Ref      |
| MN602266 | Unassigned | Unassigned | Unassigned | 970_0  | Clustered           | 2 VC_970_0   | 2  | 0.9266 | 0.81445332 | 0.7546 | 0 | 0 | 0 | 1 Ref      |
| MN602267 | Unassigned | Unassigned | Unassigned | 970_0  | Clustered           | 2 VC_970_0   | 2  | 0.9266 | 0.81445332 | 0.7546 | 0 | 0 | 0 | 1 Ref      |
| MN602268 | Unassigned | Unassigned | Unassigned | 1012_1 | Clustered           | 2 VC_1012_1  | 2  | 0.0779 | 0.93977186 | 0.0732 | 0 | 0 | 0 | 1 Ref      |
| MN604053 | Unassigned | Unassigned | Unassigned | 610_0  | Clustered           | 14 VC_610_0  | 14 | 0.5159 | 1          | 0.5159 | 0 | 0 | 0 | 1 Ref      |



|          |            |            |            |        |           |              |     |        |            |        |   |   |   |            |
|----------|------------|------------|------------|--------|-----------|--------------|-----|--------|------------|--------|---|---|---|------------|
| MN604230 | Unassigned | Unassigned | Unassigned | 148_0  | Clustered | 2 VC_148_0   | 2   | 0.3861 | 0.94836333 | 0.3662 | 0 | 0 | 0 | 1 Ref      |
| MN604238 | Unassigned | Unassigned | Unassigned | 714_0  | Clustered | 71 VC_714_0  | 71  | 0.935  | 1          | 0.935  | 0 | 0 | 0 | 1 Ref      |
| MN604239 | Unassigned | Unassigned | Unassigned | 714_0  | Clustered | 71 VC_714_0  | 71  | 0.935  | 1          | 0.935  | 0 | 0 | 0 | 1 Ref      |
| MN604407 | Unassigned | Unassigned | Unassigned | 339_0  | Clustered | 11 VC_339_0  | 11  | 0.4647 | 1          | 0.4647 | 0 | 0 | 0 | 1 Ref      |
| MN604698 | Unassigned | Unassigned | Unassigned | 148_0  | Clustered | 2 VC_148_0   | 2   | 0.3861 | 0.94836333 | 0.3662 | 0 | 0 | 0 | 1 Ref      |
| MN614471 | Unassigned | Unassigned | Unassigned | 714_0  | Clustered | 71 VC_714_0  | 71  | 0.935  | 1          | 0.935  | 0 | 0 | 0 | 1 Ref      |
| MN615698 | Unassigned | Unassigned | Unassigned | 434_0  | Clustered | 45 VC_434_0  | 45  | 0.9479 | 1          | 0.9479 | 0 | 0 | 0 | 1 Ref      |
| MN615699 | Unassigned | Unassigned | Unassigned | 434_0  | Clustered | 45 VC_434_0  | 45  | 0.9479 | 1          | 0.9479 | 0 | 0 | 0 | 1 Ref      |
| MN615700 | Unassigned | Unassigned | Unassigned | 80_7   | Clustered | 33 VC_80_7   | 33  | 0.2156 | 1          | 0.2156 | 0 | 0 | 0 | 0.8409 Ref |
| MN615701 | Unassigned | Unassigned | Unassigned | 80_7   | Clustered | 33 VC_80_7   | 33  | 0.2156 | 1          | 0.2156 | 0 | 0 | 0 | 0.8409 Ref |
| MN615702 | Unassigned | Unassigned | Unassigned | 80_7   | Clustered | 33 VC_80_7   | 33  | 0.2156 | 1          | 0.2156 | 0 | 0 | 0 | 0.8409 Ref |
| MN617773 | Unassigned | Unassigned | Unassigned | 464_0  | Clustered | 16 VC_464_0  | 16  | 0.9558 | 1          | 0.9558 | 0 | 0 | 0 | 1 Ref      |
| MN617840 | Unassigned | Unassigned | Unassigned | 1296_0 | Clustered | 82 VC_1296_0 | 82  | 0.7938 | 1          | 0.7938 | 0 | 0 | 0 | 1 Ref      |
| MN617842 | Unassigned | Unassigned | Unassigned | 985_0  | Clustered | 38 VC_985_0  | 38  | 0.9334 | 1          | 0.9334 | 0 | 0 | 0 | 1 Ref      |
| MN617843 | Unassigned | Unassigned | Unassigned | 385_2  | Clustered | 5 VC_385_2   | 5   | 0.0717 | 0.99999997 | 0.0717 | 0 | 0 | 0 | 0.9 Ref    |
| MN617844 | Unassigned | Unassigned | Unassigned | 974_0  | Clustered | 34 VC_974_0  | 34  | 0.7953 | 1          | 0.7953 | 0 | 0 | 0 | 1 Ref      |
| MN617845 | Unassigned | Unassigned | Unassigned | 335_1  | Clustered | 2 VC_335_1   | 2   | 0.0043 | 0.95663348 | 0.0041 | 0 | 0 | 0 | 1 Ref      |
| MN642089 | Unassigned | Unassigned | Unassigned | 456_1  | Clustered | 3 VC_456_1   | 3   | 0.053  | 0.99419552 | 0.0527 | 0 | 0 | 0 | 1 Ref      |
| MN648195 | Unassigned | Unassigned | Unassigned | 510_1  | Clustered | 20 VC_510_1  | 20  | 0.4172 | 1          | 0.4172 | 0 | 0 | 0 | 1 Ref      |
| MN648445 | Unassigned | Unassigned | Unassigned | 293_17 | Clustered | 8 VC_293_17  | 8   | 0.0534 | 0.99997879 | 0.0534 | 0 | 0 | 0 | 0.6071 Ref |
| MN651570 | Unassigned | Unassigned | Unassigned | 714_0  | Clustered | 71 VC_714_0  | 71  | 0.935  | 1          | 0.935  | 0 | 0 | 0 | 1 Ref      |
| MN655998 | Unassigned | Unassigned | Unassigned | 609_0  | Clustered | 27 VC_609_0  | 27  | 0.9943 | 1          | 0.9943 | 0 | 0 | 0 | 1 Ref      |
| MN655999 | Unassigned | Unassigned | Unassigned | 340_11 | Clustered | 15 VC_340_11 | 15  | 0.079  | 1          | 0.079  | 0 | 0 | 0 | 0.9333 Ref |
| MN656093 | Unassigned | Unassigned | Unassigned | 860_0  | Clustered | 9 VC_860_0   | 9   | 0.7723 | 1          | 0.7723 | 0 | 0 | 0 | 1 Ref      |
| MN662249 | Unassigned | Unassigned | Unassigned | 510_1  | Clustered | 20 VC_510_1  | 20  | 0.4172 | 1          | 0.4172 | 0 | 0 | 0 | 1 Ref      |
| MN688132 | Unassigned | Unassigned | Unassigned | 36_0   | Clustered | 4 VC_36_0    | 4   | 0.0597 | 0.99994573 | 0.0597 | 0 | 0 | 0 | 1 Ref      |
| MN689503 | Unassigned | Unassigned | Unassigned | 706_0  | Clustered | 52 VC_706_0  | 52  | 0.9787 | 1          | 0.9787 | 0 | 0 | 0 | 1 Ref      |
| MN689504 | Unassigned | Unassigned | Unassigned | 706_0  | Clustered | 52 VC_706_0  | 52  | 0.9787 | 1          | 0.9787 | 0 | 0 | 0 | 1 Ref      |
| MN689505 | Unassigned | Unassigned | Unassigned | 706_0  | Clustered | 52 VC_706_0  | 52  | 0.9787 | 1          | 0.9787 | 0 | 0 | 0 | 1 Ref      |
| MN689506 | Unassigned | Unassigned | Unassigned | 706_0  | Clustered | 52 VC_706_0  | 52  | 0.9787 | 1          | 0.9787 | 0 | 0 | 0 | 1 Ref      |
| MN689507 | Unassigned | Unassigned | Unassigned | 706_0  | Clustered | 52 VC_706_0  | 52  | 0.9787 | 1          | 0.9787 | 0 | 0 | 0 | 1 Ref      |
| MN689508 | Unassigned | Unassigned | Unassigned | 706_0  | Clustered | 52 VC_706_0  | 52  | 0.9787 | 1          | 0.9787 | 0 | 0 | 0 | 1 Ref      |
| MN689509 | Unassigned | Unassigned | Unassigned | 266_0  | Clustered | 13 VC_266_0  | 13  | 0.3622 | 1          | 0.3622 | 0 | 0 | 0 | 1 Ref      |
| MN689510 | Unassigned | Unassigned | Unassigned | 706_0  | Clustered | 52 VC_706_0  | 52  | 0.9787 | 1          | 0.9787 | 0 | 0 | 0 | 1 Ref      |
| MN689511 | Unassigned | Unassigned | Unassigned | 706_0  | Clustered | 52 VC_706_0  | 52  | 0.9787 | 1          | 0.9787 | 0 | 0 | 0 | 1 Ref      |
| MN689512 | Unassigned | Unassigned | Unassigned | 706_0  | Clustered | 52 VC_706_0  | 52  | 0.9787 | 1          | 0.9787 | 0 | 0 | 0 | 1 Ref      |
| MN689513 | Unassigned | Unassigned | Unassigned | 706_0  | Clustered | 52 VC_706_0  | 52  | 0.9787 | 1          | 0.9787 | 0 | 0 | 0 | 1 Ref      |
| MN689514 | Unassigned | Unassigned | Unassigned | 210_0  | Clustered | 105 VC_210_0 | 105 | 0.4076 | 1          | 0.4076 | 0 | 0 | 0 | 0.7766 Ref |
| MN689515 | Unassigned | Unassigned | Unassigned | 706_0  | Clustered | 52 VC_706_0  | 52  | 0.9787 | 1          | 0.9787 | 0 | 0 | 0 | 1 Ref      |
| MN689516 | Unassigned | Unassigned | Unassigned | 266_0  | Clustered | 13 VC_266_0  | 13  | 0.3622 | 1          | 0.3622 | 0 | 0 | 0 | 1 Ref      |
| MN689517 | Unassigned | Unassigned | Unassigned | 210_0  | Clustered | 105 VC_210_0 | 105 | 0.4076 | 1          | 0.4076 | 0 | 0 | 0 | 0.7766 Ref |
| MN689518 | Unassigned | Unassigned | Unassigned | 210_0  | Clustered | 105 VC_210_0 | 105 | 0.4076 | 1          | 0.4076 | 0 | 0 | 0 | 0.7766 Ref |
| MN689519 | Unassigned | Unassigned | Unassigned | 210_0  | Clustered | 105 VC_210_0 | 105 | 0.4076 | 1          | 0.4076 | 0 | 0 | 0 | 0.7766 Ref |
| MN689520 | Unassigned | Unassigned | Unassigned | 210_0  | Clustered | 105 VC_210_0 | 105 | 0.4076 | 1          | 0.4076 | 0 | 0 | 0 | 0.7766 Ref |
| MN689521 | Unassigned | Unassigned | Unassigned | 266_0  | Clustered | 13 VC_266_0  | 13  | 0.3622 | 1          | 0.3622 | 0 | 0 | 0 | 1 Ref      |
| MN689522 | Unassigned | Unassigned | Unassigned | 210_0  | Clustered | 105 VC_210_0 | 105 | 0.4076 | 1          | 0.4076 | 0 | 0 | 0 | 0.7766 Ref |
| MN689523 | Unassigned | Unassigned | Unassigned | 210_0  | Clustered | 105 VC_210_0 | 105 | 0.4076 | 1          | 0.4076 | 0 | 0 | 0 | 0.7766 Ref |
| MN689524 | Unassigned | Unassigned | Unassigned | 210_0  | Clustered | 105 VC_210_0 | 105 | 0.4076 | 1          | 0.4076 | 0 | 0 | 0 | 0.7766 Ref |
| MN689525 | Unassigned | Unassigned | Unassigned | 210_0  | Clustered | 105 VC_210_0 | 105 | 0.4076 | 1          | 0.4076 | 0 | 0 | 0 | 0.7766 Ref |
| MN689526 | Unassigned | Unassigned | Unassigned | 706_0  | Clustered | 52 VC_706_0  | 52  | 0.9787 | 1          | 0.9787 | 0 | 0 | 0 | 1 Ref      |
| MN689527 | Unassigned | Unassigned | Unassigned | 706_0  | Clustered | 52 VC_706_0  | 52  | 0.9787 | 1          | 0.9787 | 0 | 0 | 0 | 1 Ref      |
| MN689528 | Unassigned | Unassigned | Unassigned | 706_0  | Clustered | 52 VC_706_0  | 52  | 0.9787 | 1          | 0.9787 | 0 | 0 | 0 | 1 Ref      |
| MN689529 | Unassigned | Unassigned | Unassigned | 706_0  | Clustered | 52 VC_706_0  | 52  | 0.9787 | 1          | 0.9787 | 0 | 0 | 0 | 1 Ref      |
| MN689530 | Unassigned | Unassigned | Unassigned | 266_0  | Clustered | 13 VC_266_0  | 13  | 0.3622 | 1          | 0.3622 | 0 | 0 | 0 | 1 Ref      |
| MN689531 | Unassigned | Unassigned | Unassigned | 706_0  | Clustered | 52 VC_706_0  | 52  | 0.9787 | 1          | 0.9787 | 0 | 0 | 0 | 1 Ref      |
| MN689532 | Unassigned | Unassigned | Unassigned | 706_0  | Clustered | 52 VC_706_0  | 52  | 0.9787 | 1          | 0.9787 | 0 | 0 | 0 | 1 Ref      |
| MN689533 | Unassigned | Unassigned | Unassigned | 706_0  | Clustered | 52 VC_706_0  | 52  | 0.9787 | 1          | 0.9787 | 0 | 0 | 0 | 1 Ref      |
| MN689778 | Unassigned | Unassigned | Unassigned | 125_0  | Clustered | 23 VC_125_0  | 23  | 0.8163 | 1          | 0.8163 | 0 | 0 | 0 | 1 Ref      |
| MN689779 | Unassigned | Unassigned | Unassigned | 972_0  | Clustered | 99 VC_972_0  | 99  | 0.9113 | 1          | 0.9113 | 0 | 0 | 0 | 0.9928 Ref |
| MN690600 | Unassigned | Unassigned | Unassigned | 16_0   | Clustered | 12 VC_16_0   | 12  | 0.6601 | 1          | 0.6601 | 0 | 0 | 0 | 1 Ref      |
| MN692672 | Unassigned | Unassigned | Unassigned | 434_0  | Clustered | 45 VC_434_0  | 45  | 0.9479 | 1          | 0.9479 | 0 | 0 | 0 | 1 Ref      |
| MN692673 | Unassigned | Unassigned | Unassigned | 475_0  | Clustered | 96 VC_475_0  | 96  | 0.9303 | 1          | 0.9303 | 0 | 0 | 0 | 0.9575 Ref |
| MN695334 | Unassigned | Unassigned | Unassigned | 446_0  | Clustered | 2 VC_446_0   | 2   | 0.0354 | 0.95681959 | 0.0339 | 0 | 0 | 0 | 1 Ref      |
| MN695335 | Unassigned | Unassigned | Unassigned | 446_0  | Clustered | 2 VC_446_0   | 2   | 0.0354 | 0.95681959 | 0.0339 | 0 | 0 | 0 | 1 Ref      |
| MN698239 | Unassigned | Unassigned | Unassigned | 484_0  | Clustered | 3 VC_484_0   | 3   | 0.5436 | 0.99823901 | 0.5427 | 0 | 0 | 0 | 1 Ref      |
| MN698240 | Unassigned | Unassigned | Unassigned | 1038_0 | Clustered | 4 VC_1038_0  | 4   | 0.8692 | 0.99983781 | 0.8691 | 0 | 0 | 0 | 1 Ref      |
| MN698241 | Unassigned | Unassigned | Unassigned | 484_0  | Clustered | 3 VC_484_0   | 3   | 0.5436 | 0.99823901 | 0.5427 | 0 | 0 | 0 | 1 Ref      |
| MN698242 | Unassigned | Unassigned | Unassigned | 501_0  | Clustered | 3 VC_501_0   | 3   | 0.2351 | 0.99844364 | 0.2347 | 0 | 0 | 0 | 1 Ref      |
| MN698243 | Unassigned | Unassigned | Unassigned | 501_0  | Clustered | 3 VC_501_0   | 3   | 0.2351 | 0.99844364 | 0.2347 | 0 | 0 | 0 | 1 Ref      |
| MN698245 | Unassigned | Unassigned | Unassigned | 1038_0 | Clustered | 4 VC_1038_0  | 4   | 0.8692 | 0.99983781 | 0.8691 | 0 | 0 | 0 | 1 Ref      |
| MN698246 | Unassigned | Unassigned | Unassigned | 1038_0 | Clustered | 4 VC_1038_0  | 4   | 0.8692 | 0.99983781 | 0.8691 | 0 | 0 | 0 | 1 Ref      |
| MN698247 | Unassigned | Unassigned | Unassigned | 501_0  | Clustered | 3 VC_501_0   | 3   | 0.2351 | 0.99844364 | 0.2347 | 0 | 0 | 0 | 1 Ref      |
| MN698248 | Unassigned | Unassigned | Unassigned | 1038_0 | Clustered | 4 VC_1038_0  | 4   | 0.8692 | 0.99983781 | 0.8691 | 0 | 0 | 0 | 1 Ref      |
| MN703405 | Unassigned | Unassigned | Unassigned | 228_0  | Clustered | 22 VC_228_0  | 22  | 0.7411 | 1          | 0.7411 | 0 | 0 | 0 | 1 Ref      |
| MN703406 | Unassigned | Unassigned | Unassigned | 917_0  | Clustered | 28 VC_917_0  | 28  | 0.5465 | 1          | 0.5465 | 0 | 0 | 0 | 1 Ref      |
| MN703407 | Unassigned | Unassigned | Unassigned | 1408_0 | Clustered | 2 VC_1408_0  | 2   | 0.1101 | 0.95582225 | 0.1053 | 0 | 0 | 0 | 1 Ref      |
| MN703408 | Unassigned | Unassigned | Unassigned | 224_0  | Clustered | 5 VC_224_0   | 5   | 0.0685 | 0.99999998 | 0.0685 | 0 | 0 | 0 | 1 Ref      |
| MN703409 | Unassigned | Unassigned | Unassigned | 1207_0 | Clustered | 20 VC_1207_0 | 20  | 0.9898 | 1          | 0.9898 | 0 | 0 | 0 | 1 Ref      |
| MN703410 | Unassigned | Unassigned | Unassigned | 917_0  | Clustered | 28 VC_917_0  | 28  | 0.5465 | 1          | 0.5465 | 0 | 0 | 0 | 1 Ref      |
| MN703411 | Unassigned | Unassigned | Unassigned | 1117_0 | Clustered | 19 VC_1117_0 | 19  | 0.9177 | 1          | 0.9177 | 0 | 0 | 0 | 1 Ref      |
| MN703412 | Unassigned | Unassigned | Unassigned | 1204_0 | Clustered | 25 VC_1204_0 | 25  | 0.7382 | 1          | 0.7382 | 0 | 0 | 0 | 1 Ref      |



|          |            |            |            |         |                     |              |     |        |            |        |   |   |   |            |
|----------|------------|------------|------------|---------|---------------------|--------------|-----|--------|------------|--------|---|---|---|------------|
| MN703413 | Unassigned | Unassigned | Unassigned | 1250_0  | Clustered           | 29 VC_1250_0 | 29  | 0.822  | 1          | 0.822  | 0 | 0 | 0 | 1 Ref      |
| MN703414 | Unassigned | Unassigned | Unassigned | 1408_0  | Clustered           | 2 VC_1408_0  | 2   | 0.1101 | 0.95582225 | 0.1053 | 0 | 0 | 0 | 1 Ref      |
| MN703415 | Unassigned | Unassigned | Unassigned | 384_20  | Clustered/Singleton | 1 VC_384_20  | 1   | 0      | 1          | 0      | 0 | 0 | 0 | 1 Ref      |
| MN709127 | Unassigned | Unassigned | Unassigned | 609_0   | Clustered           | 27 VC_609_0  | 27  | 0.9943 | 1          | 0.9943 | 0 | 0 | 0 | 1 Ref      |
| MN709128 | Unassigned | Unassigned | Unassigned | 510_1   | Clustered           | 20 VC_510_1  | 20  | 0.4172 | 1          | 0.4172 | 0 | 0 | 0 | 1 Ref      |
| MN710383 | Unassigned | Unassigned | Unassigned | 608_0   | Clustered           | 2 VC_608_0   | 2   | 1      | 1          | 1      | 0 | 0 | 0 | 1 Ref      |
| MN715150 | Unassigned | Unassigned | Unassigned | 465_0   | Clustered           | 80 VC_465_0  | 80  | 0.9988 | 1          | 0.9988 | 0 | 0 | 0 | 1 Ref      |
| MN715356 | Unassigned | Unassigned | Unassigned | 837_1   | Clustered           | 24 VC_837_1  | 24  | 0.5328 | 1          | 0.5328 | 0 | 0 | 0 | 1 Ref      |
| MN716856 | Unassigned | Unassigned | Unassigned | 290_131 | Clustered/Singleton | 1 VC_290_131 | 1   | 0      | 1          | 0      | 0 | 0 | 0 | 1 Ref      |
| MN718463 | Unassigned | Unassigned | Unassigned | 788_0   | Clustered           | 2 VC_788_0   | 2   | 0.2235 | 0.95055313 | 0.2125 | 0 | 0 | 0 | 1 Ref      |
| MN719123 | Unassigned | Unassigned | Unassigned | 17_0    | Clustered           | 9 VC_17_0    | 9   | 0.6954 | 1          | 0.6954 | 0 | 0 | 0 | 1 Ref      |
| MN722429 | Unassigned | Unassigned | Unassigned | 654_0   | Clustered           | 115 VC_654_0 | 115 | 0.7303 | 1          | 0.7303 | 0 | 0 | 0 | 0.8764 Ref |
| MN723850 | Unassigned | Unassigned | Unassigned | 510_1   | Clustered           | 20 VC_510_1  | 20  | 0.4172 | 1          | 0.4172 | 0 | 0 | 0 | 1 Ref      |
| MN727882 | Unassigned | Unassigned | Unassigned | 102_0   | Clustered           | 15 VC_102_0  | 15  | 0.653  | 1          | 0.653  | 0 | 0 | 0 | 1 Ref      |
| MN728683 | Unassigned | Unassigned | Unassigned | 230_0   | Clustered           | 38 VC_230_0  | 38  | 0.9076 | 1          | 0.9076 | 0 | 0 | 0 | 1 Ref      |
| MN728684 | Unassigned | Unassigned | Unassigned | 535_1   | Clustered           | 108 VC_535_1 | 108 | 0.8479 | 1          | 0.8479 | 0 | 0 | 0 | 0.9955 Ref |
| MN729595 | Unassigned | Unassigned | Unassigned | 131_0   | Clustered           | 43 VC_131_0  | 43  | 0.8853 | 1          | 0.8853 | 0 | 0 | 0 | 1 Ref      |
| MN729596 | Unassigned | Unassigned | Unassigned | 131_0   | Clustered           | 43 VC_131_0  | 43  | 0.8853 | 1          | 0.8853 | 0 | 0 | 0 | 1 Ref      |
| MN729597 | Unassigned | Unassigned | Unassigned | 131_0   | Clustered           | 43 VC_131_0  | 43  | 0.8853 | 1          | 0.8853 | 0 | 0 | 0 | 1 Ref      |
| MN729598 | Unassigned | Unassigned | Unassigned | 131_0   | Clustered           | 43 VC_131_0  | 43  | 0.8853 | 1          | 0.8853 | 0 | 0 | 0 | 1 Ref      |
| MN729599 | Unassigned | Unassigned | Unassigned | 131_0   | Clustered           | 43 VC_131_0  | 43  | 0.8853 | 1          | 0.8853 | 0 | 0 | 0 | 1 Ref      |
| MN729600 | Unassigned | Unassigned | Unassigned | 131_0   | Clustered           | 43 VC_131_0  | 43  | 0.8853 | 1          | 0.8853 | 0 | 0 | 0 | 1 Ref      |
| MN732867 | Unassigned | Unassigned | Unassigned | 601_0   | Clustered           | 4 VC_601_0   | 4   | 0.0581 | 0.99996075 | 0.0581 | 0 | 0 | 0 | 1 Ref      |
| MN732883 | Unassigned | Unassigned | Unassigned | 510_1   | Clustered           | 20 VC_510_1  | 20  | 0.4172 | 1          | 0.4172 | 0 | 0 | 0 | 1 Ref      |
| MN734437 | Unassigned | Unassigned | Unassigned | 769_0   | Clustered           | 3 VC_769_0   | 3   | 0.0785 | 0.9984602  | 0.0784 | 0 | 0 | 0 | 1 Ref      |
| MN734438 | Unassigned | Unassigned | Unassigned | 769_0   | Clustered           | 3 VC_769_0   | 3   | 0.0785 | 0.9984602  | 0.0784 | 0 | 0 | 0 | 1 Ref      |
| MN734439 | Unassigned | Unassigned | Unassigned | 769_0   | Clustered           | 3 VC_769_0   | 3   | 0.0785 | 0.9984602  | 0.0784 | 0 | 0 | 0 | 1 Ref      |
| MN735429 | Unassigned | Unassigned | Unassigned | 1200_0  | Clustered           | 73 VC_1200_0 | 73  | 0.9825 | 1          | 0.9825 | 0 | 0 | 0 | 1 Ref      |
| MN735430 | Unassigned | Unassigned | Unassigned | 1296_0  | Clustered           | 82 VC_1296_0 | 82  | 0.7938 | 1          | 0.7938 | 0 | 0 | 0 | 1 Ref      |
| MN735431 | Unassigned | Unassigned | Unassigned | 538_12  | Clustered/Singleton | 1 VC_538_12  | 1   | 0      | 1          | 0      | 0 | 0 | 0 | 1 Ref      |
| MN735432 | Unassigned | Unassigned | Unassigned | 1087_0  | Clustered           | 7 VC_1087_0  | 7   | 0.94   | 1          | 0.94   | 0 | 0 | 0 | 1 Ref      |
| MN735434 | Unassigned | Unassigned | Unassigned | 579_79  | Clustered/Singleton | 1 VC_579_79  | 1   | 0      | 1          | 0      | 0 | 0 | 0 | 1 Ref      |
| MN735435 | Unassigned | Unassigned | Unassigned | 1296_0  | Clustered           | 82 VC_1296_0 | 82  | 0.7938 | 1          | 0.7938 | 0 | 0 | 0 | 1 Ref      |
| MN737551 | Unassigned | Unassigned | Unassigned | 475_0   | Clustered           | 96 VC_475_0  | 96  | 0.9303 | 1          | 0.9303 | 0 | 0 | 0 | 0.9575 Ref |
| MN737622 | Unassigned | Unassigned | Unassigned | 240_0   | Clustered           | 2 VC_240_0   | 2   | 0.7151 | 0.72985431 | 0.5219 | 0 | 0 | 0 | 1 Ref      |
| MN746332 | Unassigned | Unassigned | Unassigned | 289_0   | Clustered           | 2 VC_289_0   | 2   | 0.219  | 0.95471323 | 0.2091 | 0 | 0 | 0 | 1 Ref      |
| MN781580 | Unassigned | Unassigned | Unassigned | 290_21  | Clustered/Singleton | 1 VC_290_21  | 1   | 0      | 1          | 0      | 0 | 0 | 0 | 1 Ref      |
| MN781674 | Unassigned | Unassigned | Unassigned | 976_0   | Clustered           | 36 VC_976_0  | 36  | 0.7833 | 1          | 0.7833 | 0 | 0 | 0 | 1 Ref      |
| MN782535 | Unassigned | Unassigned | Unassigned | 510_1   | Clustered           | 20 VC_510_1  | 20  | 0.4172 | 1          | 0.4172 | 0 | 0 | 0 | 1 Ref      |
| MN783016 | Unassigned | Unassigned | Unassigned | 972_0   | Clustered           | 99 VC_972_0  | 99  | 0.9113 | 1          | 0.9113 | 0 | 0 | 0 | 0.9928 Ref |
| MN788369 | Unassigned | Unassigned | Unassigned | 133_0   | Clustered           | 17 VC_133_0  | 17  | 0.2654 | 1          | 0.2654 | 0 | 0 | 0 | 1 Ref      |
| MN794000 | Unassigned | Unassigned | Unassigned | 113_0   | Clustered           | 91 VC_113_0  | 91  | 0.9584 | 1          | 0.9584 | 0 | 0 | 0 | 1 Ref      |
| MN794001 | Unassigned | Unassigned | Unassigned | 113_0   | Clustered           | 91 VC_113_0  | 91  | 0.9584 | 1          | 0.9584 | 0 | 0 | 0 | 1 Ref      |
| MN794002 | Unassigned | Unassigned | Unassigned | 113_0   | Clustered           | 91 VC_113_0  | 91  | 0.9584 | 1          | 0.9584 | 0 | 0 | 0 | 1 Ref      |
| MN794003 | Unassigned | Unassigned | Unassigned | 113_0   | Clustered           | 91 VC_113_0  | 91  | 0.9584 | 1          | 0.9584 | 0 | 0 | 0 | 1 Ref      |
| MN794232 | Unassigned | Unassigned | Unassigned | 549_1   | Clustered           | 6 VC_549_1   | 6   | 0.1479 | 0.9998319  | 0.1478 | 0 | 0 | 0 | 1 Ref      |
| MN807240 | Unassigned | Unassigned | Unassigned | 1067_0  | Clustered           | 20 VC_1067_0 | 20  | 0.7109 | 1          | 0.7109 | 0 | 0 | 0 | 1 Ref      |
| MN807246 | Unassigned | Unassigned | Unassigned | 1296_0  | Clustered           | 82 VC_1296_0 | 82  | 0.7938 | 1          | 0.7938 | 0 | 0 | 0 | 1 Ref      |
| MN807247 | Unassigned | Unassigned | Unassigned | 533_0   | Clustered           | 16 VC_533_0  | 16  | 0.3765 | 1          | 0.3765 | 0 | 0 | 0 | 1 Ref      |
| MN807248 | Unassigned | Unassigned | Unassigned | 537_0   | Clustered           | 39 VC_537_0  | 39  | 0.8148 | 1          | 0.8148 | 0 | 0 | 0 | 1 Ref      |
| MN807249 | Unassigned | Unassigned | Unassigned | 537_0   | Clustered           | 39 VC_537_0  | 39  | 0.8148 | 1          | 0.8148 | 0 | 0 | 0 | 1 Ref      |
| MN807250 | Unassigned | Unassigned | Unassigned | 537_0   | Clustered           | 39 VC_537_0  | 39  | 0.8148 | 1          | 0.8148 | 0 | 0 | 0 | 1 Ref      |
| MN807295 | Unassigned | Unassigned | Unassigned | 714_0   | Clustered           | 71 VC_714_0  | 71  | 0.935  | 1          | 0.935  | 0 | 0 | 0 | 1 Ref      |
| MN812203 | Unassigned | Unassigned | Unassigned | 1059_0  | Clustered           | 10 VC_1059_0 | 10  | 0.8794 | 1          | 0.8794 | 0 | 0 | 0 | 1 Ref      |
| MN812204 | Unassigned | Unassigned | Unassigned | 1059_0  | Clustered           | 10 VC_1059_0 | 10  | 0.8794 | 1          | 0.8794 | 0 | 0 | 0 | 1 Ref      |
| MN812205 | Unassigned | Unassigned | Unassigned | 1059_0  | Clustered           | 10 VC_1059_0 | 10  | 0.8794 | 1          | 0.8794 | 0 | 0 | 0 | 1 Ref      |
| MN812206 | Unassigned | Unassigned | Unassigned | 1049_0  | Clustered           | 34 VC_1049_0 | 34  | 0.9937 | 1          | 0.9937 | 0 | 0 | 0 | 1 Ref      |
| MN812207 | Unassigned | Unassigned | Unassigned | 1049_0  | Clustered           | 34 VC_1049_0 | 34  | 0.9937 | 1          | 0.9937 | 0 | 0 | 0 | 1 Ref      |
| MN812208 | Unassigned | Unassigned | Unassigned | 1049_0  | Clustered           | 34 VC_1049_0 | 34  | 0.9937 | 1          | 0.9937 | 0 | 0 | 0 | 1 Ref      |
| MN812209 | Unassigned | Unassigned | Unassigned | 1049_0  | Clustered           | 34 VC_1049_0 | 34  | 0.9937 | 1          | 0.9937 | 0 | 0 | 0 | 1 Ref      |
| MN812210 | Unassigned | Unassigned | Unassigned | 1049_0  | Clustered           | 34 VC_1049_0 | 34  | 0.9937 | 1          | 0.9937 | 0 | 0 | 0 | 1 Ref      |
| MN812212 | Unassigned | Unassigned | Unassigned | 1049_0  | Clustered           | 34 VC_1049_0 | 34  | 0.9937 | 1          | 0.9937 | 0 | 0 | 0 | 1 Ref      |
| MN812213 | Unassigned | Unassigned | Unassigned | 1049_0  | Clustered           | 34 VC_1049_0 | 34  | 0.9937 | 1          | 0.9937 | 0 | 0 | 0 | 1 Ref      |
| MN812214 | Unassigned | Unassigned | Unassigned | 1049_0  | Clustered           | 34 VC_1049_0 | 34  | 0.9937 | 1          | 0.9937 | 0 | 0 | 0 | 1 Ref      |
| MN812215 | Unassigned | Unassigned | Unassigned | 1049_0  | Clustered           | 34 VC_1049_0 | 34  | 0.9937 | 1          | 0.9937 | 0 | 0 | 0 | 1 Ref      |
| MN812216 | Unassigned | Unassigned | Unassigned | 1049_0  | Clustered           | 34 VC_1049_0 | 34  | 0.9937 | 1          | 0.9937 | 0 | 0 | 0 | 1 Ref      |
| MN812217 | Unassigned | Unassigned | Unassigned | 1049_0  | Clustered           | 34 VC_1049_0 | 34  | 0.9937 | 1          | 0.9937 | 0 | 0 | 0 | 1 Ref      |
| MN812218 | Unassigned | Unassigned | Unassigned | 1049_0  | Clustered           | 34 VC_1049_0 | 34  | 0.9937 | 1          | 0.9937 | 0 | 0 | 0 | 1 Ref      |
| MN812219 | Unassigned | Unassigned | Unassigned | 1049_0  | Clustered           | 34 VC_1049_0 | 34  | 0.9937 | 1          | 0.9937 | 0 | 0 | 0 | 1 Ref      |
| MN812220 | Unassigned | Unassigned | Unassigned | 1049_0  | Clustered           | 34 VC_1049_0 | 34  | 0.9937 | 1          | 0.9937 | 0 | 0 | 0 | 1 Ref      |
| MN812221 | Unassigned | Unassigned | Unassigned | 1049_0  | Clustered           | 34 VC_1049_0 | 34  | 0.9937 | 1          | 0.9937 | 0 | 0 | 0 | 1 Ref      |
| MN812222 | Unassigned | Unassigned | Unassigned | 1049_0  | Clustered           | 34 VC_1049_0 | 34  | 0.9937 | 1          | 0.9937 | 0 | 0 | 0 | 1 Ref      |
| MN812223 | Unassigned | Unassigned | Unassigned | 1049_0  | Clustered           | 34 VC_1049_0 | 34  | 0.9937 | 1          | 0.9937 | 0 | 0 | 0 | 1 Ref      |
| MN812224 | Unassigned | Unassigned | Unassigned | 1049_0  | Clustered           | 34 VC_1049_0 | 34  | 0.9937 | 1          | 0.9937 | 0 | 0 | 0 | 1 Ref      |
| MN812225 | Unassigned | Unassigned | Unassigned | 1049_0  | Clustered           | 34 VC_1049_0 | 34  | 0.9937 | 1          | 0.9937 | 0 | 0 | 0 | 1 Ref      |
| MN812226 | Unassigned | Unassigned | Unassigned | 1049_0  | Clustered           | 34 VC_1049_0 | 34  | 0.9937 | 1          | 0.9937 | 0 | 0 | 0 | 1 Ref      |
| MN812227 | Unassigned | Unassigned | Unassigned | 1049_0  | Clustered           | 34 VC_1049_0 | 34  | 0.9937 | 1          | 0.9937 | 0 | 0 | 0 | 1 Ref      |
| MN812228 | Unassigned | Unassigned | Unassigned | 1049_0  | Clustered           | 34 VC_1049_0 | 34  | 0.9937 | 1          | 0.9937 | 0 | 0 | 0 | 1 Ref      |
| MN812229 | Unassigned | Unassigned | Unassigned | 1049_0  | Clustered           | 34 VC_1049_0 | 34  | 0.9937 | 1          | 0.9937 | 0 | 0 | 0 | 1 Ref      |
| MN812230 | Unassigned | Unassigned | Unassigned | 1049_0  | Clustered           | 34 VC_1049_0 | 34  | 0.9937 | 1          | 0.9937 | 0 | 0 | 0 | 1 Ref      |
| MN812231 | Unassigned | Unassigned | Unassigned | 1049_0  | Clustered           | 34 VC_1049_0 | 34  | 0.9937 | 1          | 0.9937 | 0 | 0 | 0 | 1 Ref      |



|          |            |            |            |        |                     |              |     |        |            |        |   |   |   |            |
|----------|------------|------------|------------|--------|---------------------|--------------|-----|--------|------------|--------|---|---|---|------------|
| MN812232 | Unassigned | Unassigned | Unassigned | 1049_0 | Clustered           | 34 VC_1049_0 | 34  | 0.9937 | 1          | 0.9937 | 0 | 0 | 0 | 1 Ref      |
| MN812233 | Unassigned | Unassigned | Unassigned | 1049_0 | Clustered           | 34 VC_1049_0 | 34  | 0.9937 | 1          | 0.9937 | 0 | 0 | 0 | 1 Ref      |
| MN812234 | Unassigned | Unassigned | Unassigned | 1049_0 | Clustered           | 34 VC_1049_0 | 34  | 0.9937 | 1          | 0.9937 | 0 | 0 | 0 | 1 Ref      |
| MN812235 | Unassigned | Unassigned | Unassigned | 1049_0 | Clustered           | 34 VC_1049_0 | 34  | 0.9937 | 1          | 0.9937 | 0 | 0 | 0 | 1 Ref      |
| MN812236 | Unassigned | Unassigned | Unassigned | 1049_0 | Clustered           | 34 VC_1049_0 | 34  | 0.9937 | 1          | 0.9937 | 0 | 0 | 0 | 1 Ref      |
| MN812237 | Unassigned | Unassigned | Unassigned | 1049_0 | Clustered           | 34 VC_1049_0 | 34  | 0.9937 | 1          | 0.9937 | 0 | 0 | 0 | 1 Ref      |
| MN812238 | Unassigned | Unassigned | Unassigned | 1049_0 | Clustered           | 34 VC_1049_0 | 34  | 0.9937 | 1          | 0.9937 | 0 | 0 | 0 | 1 Ref      |
| MN812240 | Unassigned | Unassigned | Unassigned | 1049_0 | Clustered           | 34 VC_1049_0 | 34  | 0.9937 | 1          | 0.9937 | 0 | 0 | 0 | 1 Ref      |
| MN812241 | Unassigned | Unassigned | Unassigned | 1049_0 | Clustered           | 34 VC_1049_0 | 34  | 0.9937 | 1          | 0.9937 | 0 | 0 | 0 | 1 Ref      |
| MN812685 | Unassigned | Unassigned | Unassigned | 865_0  | Clustered           | 10 VC_865_0  | 10  | 0.5975 | 1          | 0.5975 | 0 | 0 | 0 | 1 Ref      |
| MN812686 | Unassigned | Unassigned | Unassigned | 465_0  | Clustered           | 80 VC_465_0  | 80  | 0.9988 | 1          | 0.9988 | 0 | 0 | 0 | 1 Ref      |
| MN812687 | Unassigned | Unassigned | Unassigned | 865_0  | Clustered           | 10 VC_865_0  | 10  | 0.5975 | 1          | 0.5975 | 0 | 0 | 0 | 1 Ref      |
| MN812688 | Unassigned | Unassigned | Unassigned | 816_0  | Clustered           | 35 VC_816_0  | 35  | 0.9824 | 1          | 0.9824 | 0 | 0 | 0 | 1 Ref      |
| MN812690 | Unassigned | Unassigned | Unassigned | 1018_0 | Clustered           | 38 VC_1018_0 | 38  | 0.9757 | 1          | 0.9757 | 0 | 0 | 0 | 1 Ref      |
| MN812691 | Unassigned | Unassigned | Unassigned | 865_0  | Clustered           | 10 VC_865_0  | 10  | 0.5975 | 1          | 0.5975 | 0 | 0 | 0 | 1 Ref      |
| MN812692 | Unassigned | Unassigned | Unassigned | 1018_0 | Clustered           | 38 VC_1018_0 | 38  | 0.9757 | 1          | 0.9757 | 0 | 0 | 0 | 1 Ref      |
| MN812693 | Unassigned | Unassigned | Unassigned | 406_0  | Clustered           | 7 VC_406_0   | 7   | 0.176  | 1          | 0.176  | 0 | 0 | 0 | 1 Ref      |
| MN812694 | Unassigned | Unassigned | Unassigned | 79_4   | Clustered/Singleton | 1 VC_79_4    | 1   | 0      | 1          | 0      | 0 | 0 | 0 | 1 Ref      |
| MN812722 | Unassigned | Unassigned | Unassigned | 366_0  | Clustered           | 4 VC_366_0   | 4   | 0.1731 | 0.99998684 | 0.1731 | 0 | 0 | 0 | 0.8333 Ref |
| MN813048 | Unassigned | Unassigned | Unassigned | 133_0  | Clustered           | 17 VC_133_0  | 17  | 0.2654 | 1          | 0.2654 | 0 | 0 | 0 | 1 Ref      |
| MN813049 | Unassigned | Unassigned | Unassigned | 133_0  | Clustered           | 17 VC_133_0  | 17  | 0.2654 | 1          | 0.2654 | 0 | 0 | 0 | 1 Ref      |
| MN813050 | Unassigned | Unassigned | Unassigned | 133_0  | Clustered           | 17 VC_133_0  | 17  | 0.2654 | 1          | 0.2654 | 0 | 0 | 0 | 1 Ref      |
| MN813051 | Unassigned | Unassigned | Unassigned | 133_0  | Clustered           | 17 VC_133_0  | 17  | 0.2654 | 1          | 0.2654 | 0 | 0 | 0 | 1 Ref      |
| MN813052 | Unassigned | Unassigned | Unassigned | 133_0  | Clustered           | 17 VC_133_0  | 17  | 0.2654 | 1          | 0.2654 | 0 | 0 | 0 | 1 Ref      |
| MN813053 | Unassigned | Unassigned | Unassigned | 133_0  | Clustered           | 17 VC_133_0  | 17  | 0.2654 | 1          | 0.2654 | 0 | 0 | 0 | 1 Ref      |
| MN813675 | Unassigned | Unassigned | Unassigned | 787_0  | Clustered           | 132 VC_787_0 | 132 | 1      | 1          | 1      | 0 | 0 | 0 | 1 Ref      |
| MN813676 | Unassigned | Unassigned | Unassigned | 1250_0 | Clustered           | 29 VC_1250_0 | 29  | 0.822  | 1          | 0.822  | 0 | 0 | 0 | 1 Ref      |
| MN813677 | Unassigned | Unassigned | Unassigned | 787_0  | Clustered           | 132 VC_787_0 | 132 | 1      | 1          | 1      | 0 | 0 | 0 | 1 Ref      |
| MN813678 | Unassigned | Unassigned | Unassigned | 526_0  | Clustered           | 32 VC_526_0  | 32  | 0.9037 | 1          | 0.9037 | 0 | 0 | 0 | 1 Ref      |
| MN813679 | Unassigned | Unassigned | Unassigned | 787_0  | Clustered           | 132 VC_787_0 | 132 | 1      | 1          | 1      | 0 | 0 | 0 | 1 Ref      |
| MN813680 | Unassigned | Unassigned | Unassigned | 1200_0 | Clustered           | 73 VC_1200_0 | 73  | 0.9825 | 1          | 0.9825 | 0 | 0 | 0 | 1 Ref      |
| MN813682 | Unassigned | Unassigned | Unassigned | 1412_0 | Clustered           | 7 VC_1412_0  | 7   | 0.2471 | 1          | 0.2471 | 0 | 0 | 0 | 1 Ref      |
| MN813683 | Unassigned | Unassigned | Unassigned | 787_0  | Clustered           | 132 VC_787_0 | 132 | 1      | 1          | 1      | 0 | 0 | 0 | 1 Ref      |
| MN813684 | Unassigned | Unassigned | Unassigned | 1412_0 | Clustered           | 7 VC_1412_0  | 7   | 0.2471 | 1          | 0.2471 | 0 | 0 | 0 | 1 Ref      |
| MN813687 | Unassigned | Unassigned | Unassigned | 593_0  | Clustered           | 2 VC_593_0   | 2   | 0.1092 | 0.95639188 | 0.1045 | 0 | 0 | 0 | 1 Ref      |
| MN813688 | Unassigned | Unassigned | Unassigned | 787_0  | Clustered           | 132 VC_787_0 | 132 | 1      | 1          | 1      | 0 | 0 | 0 | 1 Ref      |
| MN813689 | Unassigned | Unassigned | Unassigned | 787_0  | Clustered           | 132 VC_787_0 | 132 | 1      | 1          | 1      | 0 | 0 | 0 | 1 Ref      |
| MN813690 | Unassigned | Unassigned | Unassigned | 787_0  | Clustered           | 132 VC_787_0 | 132 | 1      | 1          | 1      | 0 | 0 | 0 | 1 Ref      |
| MN813691 | Unassigned | Unassigned | Unassigned | 787_0  | Clustered           | 132 VC_787_0 | 132 | 1      | 1          | 1      | 0 | 0 | 0 | 1 Ref      |
| MN813692 | Unassigned | Unassigned | Unassigned | 787_0  | Clustered           | 132 VC_787_0 | 132 | 1      | 1          | 1      | 0 | 0 | 0 | 1 Ref      |
| MN813693 | Unassigned | Unassigned | Unassigned | 385_4  | Clustered           | 3 VC_385_4   | 3   | 0.0329 | 0.99853257 | 0.0329 | 0 | 0 | 0 | 1 Ref      |
| MN813694 | Unassigned | Unassigned | Unassigned | 1218_0 | Clustered           | 14 VC_1218_0 | 14  | 0.7811 | 1          | 0.7811 | 0 | 0 | 0 | 0.989 Ref  |
| MN813695 | Unassigned | Unassigned | Unassigned | 985_0  | Clustered           | 38 VC_985_0  | 38  | 0.9334 | 1          | 0.9334 | 0 | 0 | 0 | 1 Ref      |
| MN813696 | Unassigned | Unassigned | Unassigned | 535_1  | Clustered           | 108 VC_535_1 | 108 | 0.8479 | 1          | 0.8479 | 0 | 0 | 0 | 0.9955 Ref |
| MN813697 | Unassigned | Unassigned | Unassigned | 535_0  | Clustered           | 18 VC_535_0  | 18  | 0.1595 | 1          | 0.1595 | 0 | 0 | 0 | 1 Ref      |
| MN813698 | Unassigned | Unassigned | Unassigned | 1225_0 | Clustered           | 6 VC_1225_0  | 6   | 0.9947 | 0.99996974 | 0.9947 | 0 | 0 | 0 | 1 Ref      |
| MN813699 | Unassigned | Unassigned | Unassigned | 532_0  | Clustered           | 75 VC_532_0  | 75  | 0.9393 | 1          | 0.9393 | 0 | 0 | 0 | 1 Ref      |
| MN813700 | Unassigned | Unassigned | Unassigned | 335_12 | Clustered/Singleton | 1 VC_335_12  | 1   | 0      | 1          | 0      | 0 | 0 | 0 | 1 Ref      |
| MN830252 | Unassigned | Unassigned | Unassigned | 280_0  | Clustered           | 4 VC_280_0   | 4   | 0.3169 | 0.99994916 | 0.3169 | 0 | 0 | 0 | 0.8333 Ref |
| MN830253 | Unassigned | Unassigned | Unassigned | 280_0  | Clustered           | 4 VC_280_0   | 4   | 0.3169 | 0.99994916 | 0.3169 | 0 | 0 | 0 | 0.8333 Ref |
| MN830254 | Unassigned | Unassigned | Unassigned | 754_0  | Clustered           | 2 VC_754_0   | 2   | 0.7213 | 0.93085693 | 0.6714 | 0 | 0 | 0 | 1 Ref      |
| MN830255 | Unassigned | Unassigned | Unassigned | 754_0  | Clustered           | 2 VC_754_0   | 2   | 0.7213 | 0.93085693 | 0.6714 | 0 | 0 | 0 | 1 Ref      |
| MN830256 | Unassigned | Unassigned | Unassigned | 315_0  | Clustered           | 4 VC_315_0   | 4   | 0.2058 | 0.99995817 | 0.2057 | 0 | 0 | 0 | 1 Ref      |
| MN830257 | Unassigned | Unassigned | Unassigned | 275_0  | Clustered           | 6 VC_275_0   | 6   | 0.6515 | 0.99999994 | 0.6515 | 0 | 0 | 0 | 0.9333 Ref |
| MN830258 | Unassigned | Unassigned | Unassigned | 279_0  | Clustered           | 11 VC_279_0  | 11  | 0.4839 | 1          | 0.4839 | 0 | 0 | 0 | 0.8727 Ref |
| MN840485 | Unassigned | Unassigned | Unassigned | 470_0  | Clustered           | 62 VC_470_0  | 62  | 0.902  | 1          | 0.902  | 0 | 0 | 0 | 1 Ref      |
| MN840486 | Unassigned | Unassigned | Unassigned | 610_0  | Clustered           | 14 VC_610_0  | 14  | 0.5159 | 1          | 0.5159 | 0 | 0 | 0 | 1 Ref      |
| MN844877 | Unassigned | Unassigned | Unassigned | 160_0  | Clustered           | 4 VC_160_0   | 4   | 0.1752 | 0.9999526  | 0.1752 | 0 | 0 | 0 | 1 Ref      |
| MN850564 | Unassigned | Unassigned | Unassigned | 340_3  | Clustered           | 24 VC_340_3  | 24  | 0.1205 | 1          | 0.1205 | 0 | 0 | 0 | 0.7283 Ref |
| MN850565 | Unassigned | Unassigned | Unassigned | 871_1  | Clustered           | 26 VC_871_1  | 26  | 0.6303 | 1          | 0.6303 | 0 | 0 | 0 | 0.9815 Ref |
| MN850566 | Unassigned | Unassigned | Unassigned | 340_3  | Clustered           | 24 VC_340_3  | 24  | 0.1205 | 1          | 0.1205 | 0 | 0 | 0 | 0.7283 Ref |
| MN850567 | Unassigned | Unassigned | Unassigned | 975_0  | Clustered           | 40 VC_975_0  | 40  | 0.6888 | 1          | 0.6888 | 0 | 0 | 0 | 1 Ref      |
| MN850568 | Unassigned | Unassigned | Unassigned | 162_0  | Clustered           | 12 VC_162_0  | 12  | 0.9051 | 1          | 0.9051 | 0 | 0 | 0 | 1 Ref      |
| MN850569 | Unassigned | Unassigned | Unassigned | 975_0  | Clustered           | 40 VC_975_0  | 40  | 0.6888 | 1          | 0.6888 | 0 | 0 | 0 | 1 Ref      |
| MN850570 | Unassigned | Unassigned | Unassigned | 162_0  | Clustered           | 12 VC_162_0  | 12  | 0.9051 | 1          | 0.9051 | 0 | 0 | 0 | 1 Ref      |
| MN850571 | Unassigned | Unassigned | Unassigned | 871_1  | Clustered           | 26 VC_871_1  | 26  | 0.6303 | 1          | 0.6303 | 0 | 0 | 0 | 0.9815 Ref |
| MN850572 | Unassigned | Unassigned | Unassigned | 975_0  | Clustered           | 40 VC_975_0  | 40  | 0.6888 | 1          | 0.6888 | 0 | 0 | 0 | 1 Ref      |
| MN850573 | Unassigned | Unassigned | Unassigned | 872_0  | Clustered           | 28 VC_872_0  | 28  | 0.7887 | 1          | 0.7887 | 0 | 0 | 0 | 1 Ref      |
| MN850574 | Unassigned | Unassigned | Unassigned | 609_0  | Clustered           | 27 VC_609_0  | 27  | 0.9943 | 1          | 0.9943 | 0 | 0 | 0 | 1 Ref      |
| MN850575 | Unassigned | Unassigned | Unassigned | 859_0  | Clustered           | 67 VC_859_0  | 67  | 0.9622 | 1          | 0.9622 | 0 | 0 | 0 | 1 Ref      |
| MN850576 | Unassigned | Unassigned | Unassigned | 794_19 | Clustered           | 16 VC_794_19 | 16  | 0.0975 | 0.99616626 | 0.0971 | 0 | 0 | 0 | 0.8083 Ref |
| MN850577 | Unassigned | Unassigned | Unassigned | 340_3  | Clustered           | 24 VC_340_3  | 24  | 0.1205 | 1          | 0.1205 | 0 | 0 | 0 | 0.7283 Ref |
| MN850578 | Unassigned | Unassigned | Unassigned | 794_19 | Clustered           | 16 VC_794_19 | 16  | 0.0975 | 0.99616626 | 0.0971 | 0 | 0 | 0 | 0.8083 Ref |
| MN850579 | Unassigned | Unassigned | Unassigned | 293_1  | Clustered           | 21 VC_293_1  | 21  | 0.1694 | 1          | 0.1694 | 0 | 0 | 0 | 0.9048 Ref |
| MN850580 | Unassigned | Unassigned | Unassigned | 340_3  | Clustered           | 24 VC_340_3  | 24  | 0.1205 | 1          | 0.1205 | 0 | 0 | 0 | 0.7283 Ref |
| MN850581 | Unassigned | Unassigned | Unassigned | 721_0  | Clustered           | 11 VC_721_0  | 11  | 0.8846 | 1          | 0.8846 | 0 | 0 | 0 | 1 Ref      |
| MN850582 | Unassigned | Unassigned | Unassigned | 976_0  | Clustered           | 36 VC_976_0  | 36  | 0.7833 | 1          | 0.7833 | 0 | 0 | 0 | 1 Ref      |
| MN850583 | Unassigned | Unassigned | Unassigned | 162_0  | Clustered           | 12 VC_162_0  | 12  | 0.9051 | 1          | 0.9051 | 0 | 0 | 0 | 1 Ref      |
| MN850584 | Unassigned | Unassigned | Unassigned | 872_0  | Clustered           | 28 VC_872_0  | 28  | 0.7887 | 1          | 0.7887 | 0 | 0 | 0 | 1 Ref      |
| MN850585 | Unassigned | Unassigned | Unassigned | 340_3  | Clustered           | 24 VC_340_3  | 24  | 0.1205 | 1          | 0.1205 | 0 | 0 | 0 | 0.7283 Ref |
| MN850586 | Unassigned | Unassigned | Unassigned | 976_0  | Clustered           | 36 VC_976_0  | 36  | 0.7833 | 1          | 0.7833 | 0 | 0 | 0 | 1 Ref      |



|          |            |            |            |        |                     |              |     |        |            |        |   |   |   |        |     |
|----------|------------|------------|------------|--------|---------------------|--------------|-----|--------|------------|--------|---|---|---|--------|-----|
| MN850587 | Unassigned | Unassigned | Unassigned | 341_0  | Clustered           | 27 VC_341_0  | 27  | 0.5058 | 1          | 0.5058 | 0 | 0 | 0 | 0.8661 | Ref |
| MN850588 | Unassigned | Unassigned | Unassigned | 721_0  | Clustered           | 11 VC_721_0  | 11  | 0.8846 | 1          | 0.8846 | 0 | 0 | 0 | 1      | Ref |
| MN850589 | Unassigned | Unassigned | Unassigned | 859_0  | Clustered           | 67 VC_859_0  | 67  | 0.9622 | 1          | 0.9622 | 0 | 0 | 0 | 1      | Ref |
| MN850590 | Unassigned | Unassigned | Unassigned | 293_1  | Clustered           | 21 VC_293_1  | 21  | 0.1694 | 1          | 0.1694 | 0 | 0 | 0 | 0.9048 | Ref |
| MN850591 | Unassigned | Unassigned | Unassigned | 975_0  | Clustered           | 40 VC_975_0  | 40  | 0.6888 | 1          | 0.6888 | 0 | 0 | 0 | 1      | Ref |
| MN850592 | Unassigned | Unassigned | Unassigned | 162_0  | Clustered           | 12 VC_162_0  | 12  | 0.9051 | 1          | 0.9051 | 0 | 0 | 0 | 1      | Ref |
| MN850593 | Unassigned | Unassigned | Unassigned | 794_20 | Clustered           | 2 VC_794_20  | 2   | 0.006  | 0.58868587 | 0.0035 | 0 | 0 | 0 | 1      | Ref |
| MN850594 | Unassigned | Unassigned | Unassigned | 816_0  | Clustered           | 35 VC_816_0  | 35  | 0.9824 | 1          | 0.9824 | 0 | 0 | 0 | 1      | Ref |
| MN850595 | Unassigned | Unassigned | Unassigned | 794_19 | Clustered           | 16 VC_794_19 | 16  | 0.0975 | 0.99616626 | 0.0971 | 0 | 0 | 0 | 0.8083 | Ref |
| MN850596 | Unassigned | Unassigned | Unassigned | 976_0  | Clustered           | 36 VC_976_0  | 36  | 0.7833 | 1          | 0.7833 | 0 | 0 | 0 | 1      | Ref |
| MN850597 | Unassigned | Unassigned | Unassigned | 794_19 | Clustered           | 16 VC_794_19 | 16  | 0.0975 | 0.99616626 | 0.0971 | 0 | 0 | 0 | 0.8083 | Ref |
| MN850598 | Unassigned | Unassigned | Unassigned | 871_1  | Clustered           | 26 VC_871_1  | 26  | 0.6303 | 1          | 0.6303 | 0 | 0 | 0 | 0.9815 | Ref |
| MN850600 | Unassigned | Unassigned | Unassigned | 975_0  | Clustered           | 40 VC_975_0  | 40  | 0.6888 | 1          | 0.6888 | 0 | 0 | 0 | 1      | Ref |
| MN850601 | Unassigned | Unassigned | Unassigned | 872_0  | Clustered           | 28 VC_872_0  | 28  | 0.7887 | 1          | 0.7887 | 0 | 0 | 0 | 1      | Ref |
| MN850602 | Unassigned | Unassigned | Unassigned | 975_0  | Clustered           | 40 VC_975_0  | 40  | 0.6888 | 1          | 0.6888 | 0 | 0 | 0 | 1      | Ref |
| MN850603 | Unassigned | Unassigned | Unassigned | 340_3  | Clustered           | 24 VC_340_3  | 24  | 0.1205 | 1          | 0.1205 | 0 | 0 | 0 | 0.7283 | Ref |
| MN850604 | Unassigned | Unassigned | Unassigned | 976_0  | Clustered           | 36 VC_976_0  | 36  | 0.7833 | 1          | 0.7833 | 0 | 0 | 0 | 1      | Ref |
| MN850605 | Unassigned | Unassigned | Unassigned | 340_3  | Clustered           | 24 VC_340_3  | 24  | 0.1205 | 1          | 0.1205 | 0 | 0 | 0 | 0.7283 | Ref |
| MN850606 | Unassigned | Unassigned | Unassigned | 976_0  | Clustered           | 36 VC_976_0  | 36  | 0.7833 | 1          | 0.7833 | 0 | 0 | 0 | 1      | Ref |
| MN850607 | Unassigned | Unassigned | Unassigned | 975_0  | Clustered           | 40 VC_975_0  | 40  | 0.6888 | 1          | 0.6888 | 0 | 0 | 0 | 1      | Ref |
| MN850608 | Unassigned | Unassigned | Unassigned | 162_0  | Clustered           | 12 VC_162_0  | 12  | 0.9051 | 1          | 0.9051 | 0 | 0 | 0 | 1      | Ref |
| MN850609 | Unassigned | Unassigned | Unassigned | 297_6  | Clustered           | 12 VC_297_6  | 12  | 0.1139 | 1          | 0.1139 | 0 | 0 | 0 | 0.8182 | Ref |
| MN850610 | Unassigned | Unassigned | Unassigned | 340_3  | Clustered           | 24 VC_340_3  | 24  | 0.1205 | 1          | 0.1205 | 0 | 0 | 0 | 0.7283 | Ref |
| MN850611 | Unassigned | Unassigned | Unassigned | 340_3  | Clustered           | 24 VC_340_3  | 24  | 0.1205 | 1          | 0.1205 | 0 | 0 | 0 | 0.7283 | Ref |
| MN850612 | Unassigned | Unassigned | Unassigned | 794_19 | Clustered           | 16 VC_794_19 | 16  | 0.0975 | 0.99616626 | 0.0971 | 0 | 0 | 0 | 0.8083 | Ref |
| MN850613 | Unassigned | Unassigned | Unassigned | 976_0  | Clustered           | 36 VC_976_0  | 36  | 0.7833 | 1          | 0.7833 | 0 | 0 | 0 | 1      | Ref |
| MN850614 | Unassigned | Unassigned | Unassigned | 340_3  | Clustered           | 24 VC_340_3  | 24  | 0.1205 | 1          | 0.1205 | 0 | 0 | 0 | 0.7283 | Ref |
| MN850615 | Unassigned | Unassigned | Unassigned | 609_0  | Clustered           | 27 VC_609_0  | 27  | 0.9943 | 1          | 0.9943 | 0 | 0 | 0 | 1      | Ref |
| MN850616 | Unassigned | Unassigned | Unassigned | 654_0  | Clustered           | 115 VC_654_0 | 115 | 0.7303 | 1          | 0.7303 | 0 | 0 | 0 | 0.8764 | Ref |
| MN850617 | Unassigned | Unassigned | Unassigned | 162_0  | Clustered           | 12 VC_162_0  | 12  | 0.9051 | 1          | 0.9051 | 0 | 0 | 0 | 1      | Ref |
| MN850618 | Unassigned | Unassigned | Unassigned | 871_1  | Clustered           | 26 VC_871_1  | 26  | 0.6303 | 1          | 0.6303 | 0 | 0 | 0 | 0.9815 | Ref |
| MN850619 | Unassigned | Unassigned | Unassigned | 340_3  | Clustered           | 24 VC_340_3  | 24  | 0.1205 | 1          | 0.1205 | 0 | 0 | 0 | 0.7283 | Ref |
| MN850620 | Unassigned | Unassigned | Unassigned | 976_0  | Clustered           | 36 VC_976_0  | 36  | 0.7833 | 1          | 0.7833 | 0 | 0 | 0 | 1      | Ref |
| MN850621 | Unassigned | Unassigned | Unassigned | 297_6  | Clustered           | 12 VC_297_6  | 12  | 0.1139 | 1          | 0.1139 | 0 | 0 | 0 | 0.8182 | Ref |
| MN850622 | Unassigned | Unassigned | Unassigned | 293_17 | Clustered           | 8 VC_293_17  | 8   | 0.0534 | 0.99997879 | 0.0534 | 0 | 0 | 0 | 0.6071 | Ref |
| MN850623 | Unassigned | Unassigned | Unassigned | 721_0  | Clustered           | 11 VC_721_0  | 11  | 0.8846 | 1          | 0.8846 | 0 | 0 | 0 | 1      | Ref |
| MN850624 | Unassigned | Unassigned | Unassigned | 162_0  | Clustered           | 12 VC_162_0  | 12  | 0.9051 | 1          | 0.9051 | 0 | 0 | 0 | 1      | Ref |
| MN850625 | Unassigned | Unassigned | Unassigned | 162_0  | Clustered           | 12 VC_162_0  | 12  | 0.9051 | 1          | 0.9051 | 0 | 0 | 0 | 1      | Ref |
| MN850626 | Unassigned | Unassigned | Unassigned | 794_19 | Clustered           | 16 VC_794_19 | 16  | 0.0975 | 0.99616626 | 0.0971 | 0 | 0 | 0 | 0.8083 | Ref |
| MN850627 | Unassigned | Unassigned | Unassigned | 794_19 | Clustered           | 16 VC_794_19 | 16  | 0.0975 | 0.99616626 | 0.0971 | 0 | 0 | 0 | 0.8083 | Ref |
| MN850628 | Unassigned | Unassigned | Unassigned | 859_0  | Clustered           | 67 VC_859_0  | 67  | 0.9622 | 1          | 0.9622 | 0 | 0 | 0 | 1      | Ref |
| MN850629 | Unassigned | Unassigned | Unassigned | 859_0  | Clustered           | 67 VC_859_0  | 67  | 0.9622 | 1          | 0.9622 | 0 | 1 | 0 | 1      | Ref |
| MN850630 | Unassigned | Unassigned | Unassigned | 794_10 | Clustered           | 8 VC_794_10  | 8   | 0.0433 | 0.9088183  | 0.0394 | 0 | 0 | 0 | 0.9286 | Ref |
| MN850631 | Unassigned | Unassigned | Unassigned | 340_2  | Clustered           | 2 VC_340_2   | 2   | 0.0049 | 0.95560086 | 0.0047 | 0 | 0 | 0 | 1      | Ref |
| MN850632 | Unassigned | Unassigned | Unassigned | 872_0  | Clustered           | 28 VC_872_0  | 28  | 0.7887 | 1          | 0.7887 | 0 | 0 | 0 | 1      | Ref |
| MN850633 | Unassigned | Unassigned | Unassigned | 340_3  | Clustered           | 24 VC_340_3  | 24  | 0.1205 | 1          | 0.1205 | 0 | 0 | 0 | 0.7283 | Ref |
| MN850634 | Unassigned | Unassigned | Unassigned | 976_0  | Clustered           | 36 VC_976_0  | 36  | 0.7833 | 1          | 0.7833 | 0 | 0 | 0 | 1      | Ref |
| MN850635 | Unassigned | Unassigned | Unassigned | 340_3  | Clustered           | 24 VC_340_3  | 24  | 0.1205 | 1          | 0.1205 | 0 | 0 | 0 | 0.7283 | Ref |
| MN850636 | Unassigned | Unassigned | Unassigned | 340_3  | Clustered           | 24 VC_340_3  | 24  | 0.1205 | 1          | 0.1205 | 0 | 0 | 0 | 0.7283 | Ref |
| MN850637 | Unassigned | Unassigned | Unassigned | 340_2  | Clustered           | 2 VC_340_2   | 2   | 0.0049 | 0.95560086 | 0.0047 | 0 | 0 | 0 | 1      | Ref |
| MN850638 | Unassigned | Unassigned | Unassigned | 976_0  | Clustered           | 36 VC_976_0  | 36  | 0.7833 | 1          | 0.7833 | 0 | 0 | 0 | 1      | Ref |
| MN850639 | Unassigned | Unassigned | Unassigned | 340_3  | Clustered           | 24 VC_340_3  | 24  | 0.1205 | 1          | 0.1205 | 0 | 0 | 0 | 0.7283 | Ref |
| MN850640 | Unassigned | Unassigned | Unassigned | 975_0  | Clustered           | 40 VC_975_0  | 40  | 0.6888 | 1          | 0.6888 | 0 | 0 | 0 | 1      | Ref |
| MN850641 | Unassigned | Unassigned | Unassigned | 976_0  | Clustered           | 36 VC_976_0  | 36  | 0.7833 | 1          | 0.7833 | 0 | 0 | 0 | 1      | Ref |
| MN850642 | Unassigned | Unassigned | Unassigned | 794_16 | Clustered           | 10 VC_794_16 | 10  | 0.0563 | 0.9411319  | 0.053  | 0 | 0 | 0 | 0.8667 | Ref |
| MN850643 | Unassigned | Unassigned | Unassigned | 976_0  | Clustered           | 36 VC_976_0  | 36  | 0.7833 | 1          | 0.7833 | 0 | 0 | 0 | 1      | Ref |
| MN850644 | Unassigned | Unassigned | Unassigned | 340_3  | Clustered           | 24 VC_340_3  | 24  | 0.1205 | 1          | 0.1205 | 0 | 0 | 0 | 0.7283 | Ref |
| MN850645 | Unassigned | Unassigned | Unassigned | 872_0  | Clustered           | 28 VC_872_0  | 28  | 0.7887 | 1          | 0.7887 | 0 | 0 | 0 | 1      | Ref |
| MN850646 | Unassigned | Unassigned | Unassigned | 794_6  | Clustered           | 3 VC_794_6   | 3   | 0.012  | 0.63979507 | 0.0077 | 0 | 0 | 0 | 1      | Ref |
| MN850647 | Unassigned | Unassigned | Unassigned | 340_3  | Clustered           | 24 VC_340_3  | 24  | 0.1205 | 1          | 0.1205 | 0 | 0 | 0 | 0.7283 | Ref |
| MN850648 | Unassigned | Unassigned | Unassigned | 871_1  | Clustered           | 26 VC_871_1  | 26  | 0.6303 | 1          | 0.6303 | 0 | 0 | 0 | 0.9815 | Ref |
| MN850649 | Unassigned | Unassigned | Unassigned | 794_6  | Clustered           | 3 VC_794_6   | 3   | 0.012  | 0.63979507 | 0.0077 | 0 | 0 | 0 | 1      | Ref |
| MN850650 | Unassigned | Unassigned | Unassigned | 859_0  | Clustered           | 67 VC_859_0  | 67  | 0.9622 | 1          | 0.9622 | 0 | 0 | 0 | 1      | Ref |
| MN850651 | Unassigned | Unassigned | Unassigned | 293_2  | Clustered/Singleton | 1 VC_293_2   | 1   | 0      | 1          | 0      | 0 | 0 | 0 | 1      | Ref |
| MN854830 | Unassigned | Unassigned | Unassigned | 93_0   | Clustered           | 22 VC_93_0   | 22  | 0.5285 | 1          | 0.5285 | 0 | 0 | 0 | 1      | Ref |
| MN862068 | Unassigned | Unassigned | Unassigned | 481_0  | Clustered           | 5 VC_481_0   | 5   | 0.6783 | 0.99999996 | 0.6783 | 0 | 0 | 0 | 1      | Ref |
| MN862333 | Unassigned | Unassigned | Unassigned | 1028_0 | Clustered           | 69 VC_1028_0 | 69  | 0.8547 | 1          | 0.8547 | 0 | 0 | 0 | 1      | Ref |
| MN862335 | Unassigned | Unassigned | Unassigned | 1028_0 | Clustered           | 69 VC_1028_0 | 69  | 0.8547 | 1          | 0.8547 | 0 | 0 | 0 | 1      | Ref |
| MN862338 | Unassigned | Unassigned | Unassigned | 1108_0 | Clustered           | 52 VC_1108_0 | 52  | 0.7674 | 1          | 0.7674 | 0 | 0 | 0 | 1      | Ref |
| MN862339 | Unassigned | Unassigned | Unassigned | 1029_0 | Clustered           | 2 VC_1029_0  | 2   | 0.0422 | 0.59038153 | 0.0249 | 0 | 0 | 0 | 1      | Ref |
| MN862340 | Unassigned | Unassigned | Unassigned | 1029_0 | Clustered           | 2 VC_1029_0  | 2   | 0.0422 | 0.59038153 | 0.0249 | 0 | 0 | 0 | 1      | Ref |
| MN862341 | Unassigned | Unassigned | Unassigned | 1028_0 | Clustered           | 69 VC_1028_0 | 69  | 0.8547 | 1          | 0.8547 | 0 | 0 | 0 | 1      | Ref |
| MN862343 | Unassigned | Unassigned | Unassigned | 206_0  | Clustered           | 28 VC_206_0  | 28  | 0.2427 | 0.99971175 | 0.2426 | 0 | 0 | 0 | 1      | Ref |
| MN862345 | Unassigned | Unassigned | Unassigned | 205_0  | Clustered           | 5 VC_205_0   | 5   | 0.1325 | 0.84698401 | 0.1122 | 0 | 0 | 0 | 1      | Ref |
| MN862346 | Unassigned | Unassigned | Unassigned | 1119_0 | Clustered           | 48 VC_1119_0 | 48  | 0.852  | 1          | 0.852  | 0 | 0 | 0 | 1      | Ref |
| MN862347 | Unassigned | Unassigned | Unassigned | 1110_0 | Clustered           | 2 VC_1110_0  | 2   | 0.0455 | 0.92554266 | 0.0422 | 0 | 0 | 0 | 1      | Ref |
| MN864145 | Unassigned | Unassigned | Unassigned | 293_6  | Clustered/Singleton | 1 VC_293_6   | 1   | 0      | 1          | 0      | 0 | 0 | 0 | 1      | Ref |
| MN864865 | Unassigned | Unassigned | Unassigned | 510_2  | Clustered           | 8 VC_510_2   | 8   | 0.122  | 0.98786574 | 0.1205 | 0 | 0 | 0 | 1      | Ref |
| MN871440 | Unassigned | Unassigned | Unassigned | 457_0  | Clustered           | 7 VC_457_0   | 7   | 0.2549 | 1          | 0.2549 | 0 | 0 | 0 | 0.7143 | Ref |
| MN871441 | Unassigned | Unassigned | Unassigned | 457_4  | Clustered           | 10 VC_457_4  | 10  | 0.3316 | 1          | 0.3316 | 0 | 0 | 0 | 0.9333 | Ref |
| MN871442 | Unassigned | Unassigned | Unassigned | 457_4  | Clustered           | 10 VC_457_4  | 10  | 0.3316 | 1          | 0.3316 | 0 | 0 | 0 | 0.9333 | Ref |



|          |            |            |            |        |                     |              |    |        |            |        |   |   |   |            |
|----------|------------|------------|------------|--------|---------------------|--------------|----|--------|------------|--------|---|---|---|------------|
| MN871443 | Unassigned | Unassigned | Unassigned | 110_0  | Clustered           | 33 VC_110_0  | 33 | 0.9488 | 1          | 0.9488 | 0 | 0 | 0 | 1 Ref      |
| MN871444 | Unassigned | Unassigned | Unassigned | 359_0  | Clustered           | 3 VC_359_0   | 3  | 0.1509 | 0.99844728 | 0.1507 | 0 | 0 | 0 | 1 Ref      |
| MN871445 | Unassigned | Unassigned | Unassigned | 359_0  | Clustered           | 3 VC_359_0   | 3  | 0.1509 | 0.99844728 | 0.1507 | 0 | 0 | 0 | 1 Ref      |
| MN871446 | Unassigned | Unassigned | Unassigned | 506_0  | Clustered           | 8 VC_506_0   | 8  | 0.29   | 1          | 0.29   | 0 | 0 | 0 | 1 Ref      |
| MN871447 | Unassigned | Unassigned | Unassigned | 506_0  | Clustered           | 8 VC_506_0   | 8  | 0.29   | 1          | 0.29   | 0 | 0 | 0 | 1 Ref      |
| MN871448 | Unassigned | Unassigned | Unassigned | 506_0  | Clustered           | 8 VC_506_0   | 8  | 0.29   | 1          | 0.29   | 0 | 0 | 0 | 1 Ref      |
| MN871449 | Unassigned | Unassigned | Unassigned | 506_0  | Clustered           | 8 VC_506_0   | 8  | 0.29   | 1          | 0.29   | 0 | 0 | 0 | 1 Ref      |
| MN871450 | Unassigned | Unassigned | Unassigned | 611_0  | Clustered           | 50 VC_611_0  | 50 | 0.7306 | 1          | 0.7306 | 0 | 0 | 0 | 1 Ref      |
| MN871451 | Unassigned | Unassigned | Unassigned | 506_0  | Clustered           | 8 VC_506_0   | 8  | 0.29   | 1          | 0.29   | 0 | 0 | 0 | 1 Ref      |
| MN871452 | Unassigned | Unassigned | Unassigned | 506_0  | Clustered           | 8 VC_506_0   | 8  | 0.29   | 1          | 0.29   | 0 | 0 | 0 | 1 Ref      |
| MN871453 | Unassigned | Unassigned | Unassigned | 506_0  | Clustered           | 8 VC_506_0   | 8  | 0.29   | 1          | 0.29   | 0 | 0 | 0 | 1 Ref      |
| MN871454 | Unassigned | Unassigned | Unassigned | 81_0   | Clustered           | 41 VC_81_0   | 41 | 0.5815 | 1          | 0.5815 | 0 | 0 | 0 | 0.9805 Ref |
| MN871455 | Unassigned | Unassigned | Unassigned | 434_0  | Clustered           | 45 VC_434_0  | 45 | 0.9479 | 1          | 0.9479 | 0 | 0 | 0 | 1 Ref      |
| MN871456 | Unassigned | Unassigned | Unassigned | 172_0  | Clustered           | 26 VC_172_0  | 26 | 0.7909 | 1          | 0.7909 | 0 | 0 | 0 | 1 Ref      |
| MN871457 | Unassigned | Unassigned | Unassigned | 80_6   | Clustered           | 11 VC_80_6   | 11 | 0.0527 | 1          | 0.0527 | 0 | 0 | 0 | 0.7455 Ref |
| MN871458 | Unassigned | Unassigned | Unassigned | 80_0   | Clustered           | 64 VC_80_0   | 64 | 0.418  | 1          | 0.418  | 0 | 0 | 0 | 0.7649 Ref |
| MN871459 | Unassigned | Unassigned | Unassigned | 80_0   | Clustered           | 64 VC_80_0   | 64 | 0.418  | 1          | 0.418  | 0 | 0 | 0 | 0.7649 Ref |
| MN871460 | Unassigned | Unassigned | Unassigned | 80_6   | Clustered           | 11 VC_80_6   | 11 | 0.0527 | 1          | 0.0527 | 0 | 0 | 0 | 0.7455 Ref |
| MN871461 | Unassigned | Unassigned | Unassigned | 80_0   | Clustered           | 64 VC_80_0   | 64 | 0.418  | 1          | 0.418  | 0 | 0 | 0 | 0.7649 Ref |
| MN871462 | Unassigned | Unassigned | Unassigned | 80_0   | Clustered           | 64 VC_80_0   | 64 | 0.418  | 1          | 0.418  | 0 | 0 | 0 | 0.7649 Ref |
| MN871463 | Unassigned | Unassigned | Unassigned | 172_0  | Clustered           | 26 VC_172_0  | 26 | 0.7909 | 1          | 0.7909 | 0 | 0 | 0 | 1 Ref      |
| MN871464 | Unassigned | Unassigned | Unassigned | 80_0   | Clustered           | 64 VC_80_0   | 64 | 0.418  | 1          | 0.418  | 0 | 0 | 0 | 0.7649 Ref |
| MN871465 | Unassigned | Unassigned | Unassigned | 80_0   | Clustered           | 64 VC_80_0   | 64 | 0.418  | 1          | 0.418  | 0 | 0 | 0 | 0.7649 Ref |
| MN871466 | Unassigned | Unassigned | Unassigned | 80_0   | Clustered           | 64 VC_80_0   | 64 | 0.418  | 1          | 0.418  | 0 | 0 | 0 | 0.7649 Ref |
| MN871467 | Unassigned | Unassigned | Unassigned | 80_6   | Clustered           | 11 VC_80_6   | 11 | 0.0527 | 1          | 0.0527 | 0 | 0 | 0 | 0.7455 Ref |
| MN871468 | Unassigned | Unassigned | Unassigned | 80_9   | Clustered           | 2 VC_80_9    | 2  | 0.0061 | 0.94860001 | 0.0058 | 0 | 0 | 0 | 1 Ref      |
| MN871469 | Unassigned | Unassigned | Unassigned | 172_0  | Clustered           | 26 VC_172_0  | 26 | 0.7909 | 1          | 0.7909 | 0 | 0 | 0 | 1 Ref      |
| MN871470 | Unassigned | Unassigned | Unassigned | 77_0   | Clustered           | 37 VC_77_0   | 37 | 0.9392 | 1          | 0.9392 | 0 | 0 | 0 | 1 Ref      |
| MN871471 | Unassigned | Unassigned | Unassigned | 820_0  | Clustered           | 5 VC_820_0   | 5  | 0.332  | 0.99999997 | 0.332  | 0 | 0 | 0 | 1 Ref      |
| MN871472 | Unassigned | Unassigned | Unassigned | 820_0  | Clustered           | 5 VC_820_0   | 5  | 0.332  | 0.99999997 | 0.332  | 0 | 0 | 0 | 1 Ref      |
| MN871473 | Unassigned | Unassigned | Unassigned | 80_0   | Clustered           | 64 VC_80_0   | 64 | 0.418  | 1          | 0.418  | 0 | 0 | 0 | 0.7649 Ref |
| MN871474 | Unassigned | Unassigned | Unassigned | 820_0  | Clustered           | 5 VC_820_0   | 5  | 0.332  | 0.99999997 | 0.332  | 0 | 0 | 0 | 1 Ref      |
| MN871475 | Unassigned | Unassigned | Unassigned | 135_29 | Clustered           | 2 VC_135_29  | 2  | 0.0052 | 0.85639654 | 0.0044 | 0 | 0 | 0 | 1 Ref      |
| MN871476 | Unassigned | Unassigned | Unassigned | 486_0  | Clustered           | 47 VC_486_0  | 47 | 0.9022 | 1          | 0.9022 | 0 | 0 | 0 | 1 Ref      |
| MN871478 | Unassigned | Unassigned | Unassigned | 172_0  | Clustered           | 26 VC_172_0  | 26 | 0.7909 | 1          | 0.7909 | 0 | 0 | 0 | 1 Ref      |
| MN871479 | Unassigned | Unassigned | Unassigned | 80_0   | Clustered           | 64 VC_80_0   | 64 | 0.418  | 1          | 0.418  | 0 | 0 | 0 | 0.7649 Ref |
| MN871480 | Unassigned | Unassigned | Unassigned | 356_0  | Clustered           | 21 VC_356_0  | 21 | 0.5409 | 1          | 0.5409 | 0 | 0 | 0 | 1 Ref      |
| MN871481 | Unassigned | Unassigned | Unassigned | 77_0   | Clustered           | 37 VC_77_0   | 37 | 0.9392 | 1          | 0.9392 | 0 | 0 | 0 | 1 Ref      |
| MN871482 | Unassigned | Unassigned | Unassigned | 172_0  | Clustered           | 26 VC_172_0  | 26 | 0.7909 | 1          | 0.7909 | 0 | 0 | 0 | 1 Ref      |
| MN871483 | Unassigned | Unassigned | Unassigned | 434_0  | Clustered           | 45 VC_434_0  | 45 | 0.9479 | 1          | 0.9479 | 0 | 0 | 0 | 1 Ref      |
| MN871484 | Unassigned | Unassigned | Unassigned | 486_0  | Clustered           | 47 VC_486_0  | 47 | 0.9022 | 1          | 0.9022 | 0 | 0 | 0 | 1 Ref      |
| MN871485 | Unassigned | Unassigned | Unassigned | 80_0   | Clustered           | 64 VC_80_0   | 64 | 0.418  | 1          | 0.418  | 0 | 0 | 0 | 0.7649 Ref |
| MN871486 | Unassigned | Unassigned | Unassigned | 172_0  | Clustered           | 26 VC_172_0  | 26 | 0.7909 | 1          | 0.7909 | 0 | 0 | 0 | 1 Ref      |
| MN871487 | Unassigned | Unassigned | Unassigned | 80_0   | Clustered           | 64 VC_80_0   | 64 | 0.418  | 1          | 0.418  | 0 | 0 | 0 | 0.7649 Ref |
| MN871488 | Unassigned | Unassigned | Unassigned | 77_0   | Clustered           | 37 VC_77_0   | 37 | 0.9392 | 1          | 0.9392 | 0 | 0 | 0 | 1 Ref      |
| MN871489 | Unassigned | Unassigned | Unassigned | 356_0  | Clustered           | 21 VC_356_0  | 21 | 0.5409 | 1          | 0.5409 | 0 | 0 | 0 | 1 Ref      |
| MN871490 | Unassigned | Unassigned | Unassigned | 475_0  | Clustered           | 96 VC_475_0  | 96 | 0.9303 | 1          | 0.9303 | 0 | 0 | 0 | 0.9575 Ref |
| MN871491 | Unassigned | Unassigned | Unassigned | 135_36 | Clustered           | 2 VC_135_36  | 2  | 0.0051 | 0.86200079 | 0.0044 | 0 | 0 | 0 | 1 Ref      |
| MN871492 | Unassigned | Unassigned | Unassigned | 135_36 | Clustered           | 2 VC_135_36  | 2  | 0.0051 | 0.86200079 | 0.0044 | 0 | 0 | 0 | 1 Ref      |
| MN871493 | Unassigned | Unassigned | Unassigned | 135_37 | Clustered/Singleton | 1 VC_135_37  | 1  | 0      | 1          | 0      | 0 | 0 | 0 | 1 Ref      |
| MN871494 | Unassigned | Unassigned | Unassigned | 135_12 | Clustered           | 2 VC_135_12  | 2  | 0.005  | 0.8641083  | 0.0044 | 0 | 0 | 0 | 1 Ref      |
| MN871495 | Unassigned | Unassigned | Unassigned | 135_12 | Clustered           | 2 VC_135_12  | 2  | 0.005  | 0.8641083  | 0.0044 | 0 | 0 | 0 | 1 Ref      |
| MN871496 | Unassigned | Unassigned | Unassigned | 135_43 | Clustered           | 4 VC_135_43  | 4  | 0.0149 | 0.99993288 | 0.0149 | 0 | 0 | 0 | 1 Ref      |
| MN871497 | Unassigned | Unassigned | Unassigned | 135_43 | Clustered           | 4 VC_135_43  | 4  | 0.0149 | 0.99993288 | 0.0149 | 0 | 0 | 0 | 1 Ref      |
| MN871498 | Unassigned | Unassigned | Unassigned | 135_43 | Clustered           | 4 VC_135_43  | 4  | 0.0149 | 0.99993288 | 0.0149 | 0 | 0 | 0 | 1 Ref      |
| MN871499 | Unassigned | Unassigned | Unassigned | 135_43 | Clustered           | 4 VC_135_43  | 4  | 0.0149 | 0.99993288 | 0.0149 | 0 | 0 | 0 | 1 Ref      |
| MN871500 | Unassigned | Unassigned | Unassigned | 135_19 | Clustered           | 2 VC_135_19  | 2  | 0.005  | 0.8667049  | 0.0044 | 0 | 0 | 0 | 1 Ref      |
| MN871501 | Unassigned | Unassigned | Unassigned | 135_29 | Clustered           | 2 VC_135_29  | 2  | 0.0052 | 0.85639654 | 0.0044 | 0 | 0 | 0 | 1 Ref      |
| MN871502 | Unassigned | Unassigned | Unassigned | 135_38 | Clustered/Singleton | 1 VC_135_38  | 1  | 0      | 1          | 0      | 0 | 0 | 0 | 1 Ref      |
| MN871503 | Unassigned | Unassigned | Unassigned | 475_0  | Clustered           | 96 VC_475_0  | 96 | 0.9303 | 1          | 0.9303 | 0 | 0 | 0 | 0.9575 Ref |
| MN871504 | Unassigned | Unassigned | Unassigned | 135_10 | Clustered           | 10 VC_135_10 | 10 | 0.0522 | 1          | 0.0522 | 0 | 0 | 0 | 1 Ref      |
| MN871505 | Unassigned | Unassigned | Unassigned | 1008_0 | Clustered           | 6 VC_1008_0  | 6  | 0.2856 | 1          | 0.2856 | 0 | 0 | 0 | 1 Ref      |
| MN871506 | Unassigned | Unassigned | Unassigned | 935_2  | Clustered           | 7 VC_935_2   | 7  | 0.2837 | 1          | 0.2837 | 0 | 0 | 0 | 1 Ref      |
| MN871507 | Unassigned | Unassigned | Unassigned | 619_0  | Clustered           | 3 VC_619_0   | 3  | 0.054  | 0.97294713 | 0.0526 | 0 | 0 | 0 | 1 Ref      |
| MN871508 | Unassigned | Unassigned | Unassigned | 80_0   | Clustered           | 64 VC_80_0   | 64 | 0.418  | 1          | 0.418  | 0 | 0 | 0 | 0.7649 Ref |
| MN871509 | Unassigned | Unassigned | Unassigned | 80_0   | Clustered           | 64 VC_80_0   | 64 | 0.418  | 1          | 0.418  | 0 | 0 | 0 | 0.7649 Ref |
| MN871510 | Unassigned | Unassigned | Unassigned | 1008_0 | Clustered           | 6 VC_1008_0  | 6  | 0.2856 | 1          | 0.2856 | 0 | 0 | 0 | 1 Ref      |
| MN871511 | Unassigned | Unassigned | Unassigned | 1008_0 | Clustered           | 6 VC_1008_0  | 6  | 0.2856 | 1          | 0.2856 | 0 | 0 | 0 | 1 Ref      |
| MN876841 | Unassigned | Unassigned | Unassigned | 360_0  | Clustered           | 22 VC_360_0  | 22 | 0.96   | 1          | 0.96   | 0 | 0 | 0 | 1 Ref      |
| MN876842 | Unassigned | Unassigned | Unassigned | 360_0  | Clustered           | 22 VC_360_0  | 22 | 0.96   | 1          | 0.96   | 0 | 0 | 0 | 1 Ref      |
| MN876843 | Unassigned | Unassigned | Unassigned | 360_0  | Clustered           | 22 VC_360_0  | 22 | 0.96   | 1          | 0.96   | 0 | 0 | 0 | 1 Ref      |
| MN876845 | Unassigned | Unassigned | Unassigned | 454_0  | Clustered           | 4 VC_454_0   | 4  | 1      | 1          | 1      | 0 | 0 | 0 | 1 Ref      |
| MN882349 | Unassigned | Unassigned | Unassigned | 609_0  | Clustered           | 27 VC_609_0  | 27 | 0.9943 | 1          | 0.9943 | 0 | 0 | 0 | 1 Ref      |
| MN882542 | Unassigned | Unassigned | Unassigned | 340_18 | Clustered           | 7 VC_340_18  | 7  | 0.0326 | 1          | 0.0326 | 0 | 0 | 0 | 0.8095 Ref |
| MN882610 | Unassigned | Unassigned | Unassigned | 508_1  | Clustered           | 5 VC_508_1   | 5  | 0.0439 | 0.99999996 | 0.0439 | 0 | 0 | 0 | 1 Ref      |
| MN890136 | Unassigned | Unassigned | Unassigned | 736_0  | Clustered           | 9 VC_736_0   | 9  | 1      | 1          | 1      | 0 | 0 | 0 | 1 Ref      |
| MN890137 | Unassigned | Unassigned | Unassigned | 736_0  | Clustered           | 9 VC_736_0   | 9  | 1      | 1          | 1      | 0 | 0 | 0 | 1 Ref      |
| MN890138 | Unassigned | Unassigned | Unassigned | 736_0  | Clustered           | 9 VC_736_0   | 9  | 1      | 1          | 1      | 0 | 0 | 0 | 1 Ref      |
| MN890139 | Unassigned | Unassigned | Unassigned | 736_0  | Clustered           | 9 VC_736_0   | 9  | 1      | 1          | 1      | 0 | 0 | 0 | 1 Ref      |
| MN890140 | Unassigned | Unassigned | Unassigned | 736_0  | Clustered           | 9 VC_736_0   | 9  | 1      | 1          | 1      | 0 | 0 | 0 | 1 Ref      |
| MN890141 | Unassigned | Unassigned | Unassigned | 736_0  | Clustered           | 9 VC_736_0   | 9  | 1      | 1          | 1      | 0 | 0 | 0 | 1 Ref      |



|          |            |            |            |        |                     |              |    |        |            |        |   |   |   |            |
|----------|------------|------------|------------|--------|---------------------|--------------|----|--------|------------|--------|---|---|---|------------|
| MN890142 | Unassigned | Unassigned | Unassigned | 736_0  | Clustered           | 9 VC_736_0   | 9  | 1      | 1          | 1      | 0 | 0 | 0 | 1 Ref      |
| MN890143 | Unassigned | Unassigned | Unassigned | 736_0  | Clustered           | 9 VC_736_0   | 9  | 1      | 1          | 1      | 0 | 0 | 0 | 1 Ref      |
| MN892483 | Unassigned | Unassigned | Unassigned | 1296_0 | Clustered           | 82 VC_1296_0 | 82 | 0.7938 | 1          | 0.7938 | 0 | 0 | 0 | 1 Ref      |
| MN892484 | Unassigned | Unassigned | Unassigned | 537_0  | Clustered           | 39 VC_537_0  | 39 | 0.8148 | 1          | 0.8148 | 0 | 0 | 0 | 1 Ref      |
| MN892486 | Unassigned | Unassigned | Unassigned | 537_0  | Clustered           | 39 VC_537_0  | 39 | 0.8148 | 1          | 0.8148 | 0 | 0 | 0 | 1 Ref      |
| MN892487 | Unassigned | Unassigned | Unassigned | 228_0  | Clustered           | 22 VC_228_0  | 22 | 0.7411 | 1          | 0.7411 | 0 | 0 | 0 | 1 Ref      |
| MN894885 | Unassigned | Unassigned | Unassigned | 609_0  | Clustered           | 27 VC_609_0  | 27 | 0.9943 | 1          | 0.9943 | 0 | 0 | 0 | 1 Ref      |
| MN895434 | Unassigned | Unassigned | Unassigned | 290_39 | Clustered/Singleton | 1 VC_290_39  | 1  | 0      | 1          | 0      | 0 | 0 | 0 | 1 Ref      |
| MN895435 | Unassigned | Unassigned | Unassigned | 290_51 | Clustered/Singleton | 1 VC_290_51  | 1  | 0      | 1          | 0      | 0 | 0 | 0 | 1 Ref      |
| MN895436 | Unassigned | Unassigned | Unassigned | 290_48 | Clustered/Singleton | 1 VC_290_48  | 1  | 0      | 1          | 0      | 0 | 0 | 0 | 1 Ref      |
| MN895437 | Unassigned | Unassigned | Unassigned | 290_31 | Clustered/Singleton | 1 VC_290_31  | 1  | 0      | 1          | 0      | 0 | 0 | 0 | 1 Ref      |
| MN895438 | Unassigned | Unassigned | Unassigned | 290_44 | Clustered/Singleton | 1 VC_290_44  | 1  | 0      | 1          | 0      | 0 | 0 | 0 | 1 Ref      |
| MN901520 | Unassigned | Unassigned | Unassigned | 317_0  | Clustered           | 33 VC_317_0  | 33 | 0.8756 | 1          | 0.8756 | 0 | 0 | 0 | 1 Ref      |
| MN901521 | Unassigned | Unassigned | Unassigned | 317_0  | Clustered           | 33 VC_317_0  | 33 | 0.8756 | 1          | 0.8756 | 0 | 0 | 0 | 1 Ref      |
| MN901924 | Unassigned | Unassigned | Unassigned | 434_0  | Clustered           | 45 VC_434_0  | 45 | 0.9479 | 1          | 0.9479 | 0 | 0 | 0 | 1 Ref      |
| MN904502 | Unassigned | Unassigned | Unassigned | 1002_0 | Clustered           | 10 VC_1002_0 | 10 | 0.9987 | 1          | 0.9987 | 0 | 0 | 0 | 1 Ref      |
| MN904510 | Unassigned | Unassigned | Unassigned | 12_2   | Clustered           | 19 VC_12_2   | 19 | 0.2009 | 1          | 0.2009 | 0 | 0 | 0 | 1 Ref      |
| MN905160 | Unassigned | Unassigned | Unassigned | 79_3   | Clustered           | 11 VC_79_3   | 11 | 0.2561 | 1          | 0.2561 | 0 | 0 | 0 | 1 Ref      |
| MN906996 | Unassigned | Unassigned | Unassigned | 862_0  | Clustered           | 29 VC_862_0  | 29 | 0.8594 | 1          | 0.8594 | 0 | 0 | 0 | 1 Ref      |
| MN908683 | Unassigned | Unassigned | Unassigned | 537_0  | Clustered           | 39 VC_537_0  | 39 | 0.8148 | 1          | 0.8148 | 0 | 0 | 0 | 1 Ref      |
| MN908685 | Unassigned | Unassigned | Unassigned | 1143_0 | Clustered           | 2 VC_1143_0  | 2  | 0.1263 | 0.94673154 | 0.1196 | 0 | 0 | 0 | 1 Ref      |
| MN908689 | Unassigned | Unassigned | Unassigned | 1250_0 | Clustered           | 29 VC_1250_0 | 29 | 0.822  | 1          | 0.822  | 0 | 0 | 0 | 1 Ref      |
| MN908690 | Unassigned | Unassigned | Unassigned | 881_1  | Clustered           | 13 VC_881_1  | 13 | 0.5859 | 1          | 0.5859 | 0 | 0 | 0 | 1 Ref      |
| MN908691 | Unassigned | Unassigned | Unassigned | 1224_0 | Clustered           | 4 VC_1224_0  | 4  | 0.2813 | 0.99997676 | 0.2813 | 0 | 0 | 0 | 1 Ref      |
| MN908692 | Unassigned | Unassigned | Unassigned | 243_0  | Clustered           | 72 VC_243_0  | 72 | 0.8089 | 1          | 0.8089 | 0 | 0 | 0 | 1 Ref      |
| MN908693 | Unassigned | Unassigned | Unassigned | 528_0  | Clustered           | 12 VC_528_0  | 12 | 0.3923 | 1          | 0.3923 | 0 | 0 | 0 | 0.9697 Ref |
| MN927225 | Unassigned | Unassigned | Unassigned | 655_0  | Clustered           | 45 VC_655_0  | 45 | 0.7722 | 1          | 0.7722 | 0 | 0 | 0 | 1 Ref      |
| MN927226 | Unassigned | Unassigned | Unassigned | 655_0  | Clustered           | 45 VC_655_0  | 45 | 0.7722 | 1          | 0.7722 | 0 | 0 | 0 | 1 Ref      |
| MN929097 | Unassigned | Unassigned | Unassigned | 855_0  | Clustered           | 12 VC_855_0  | 12 | 0.6068 | 1          | 0.6068 | 0 | 0 | 0 | 1 Ref      |
| MN935200 | Unassigned | Unassigned | Unassigned | 155_28 | Clustered/Singleton | 1 VC_155_28  | 1  | 0      | 1          | 0      | 0 | 0 | 0 | 1 Ref      |
| MN937349 | Unassigned | Unassigned | Unassigned | 689_0  | Clustered           | 5 VC_689_0   | 5  | 0.5195 | 0.99999996 | 0.5195 | 0 | 0 | 0 | 1 Ref      |
| MN939408 | Unassigned | Unassigned | Unassigned | 110_0  | Clustered           | 33 VC_110_0  | 33 | 0.9488 | 1          | 0.9488 | 0 | 0 | 0 | 1 Ref      |
| MN939539 | Unassigned | Unassigned | Unassigned | 753_0  | Clustered           | 26 VC_753_0  | 26 | 0.9562 | 1          | 0.9562 | 0 | 0 | 0 | 1 Ref      |
| MN939540 | Unassigned | Unassigned | Unassigned | 753_0  | Clustered           | 26 VC_753_0  | 26 | 0.9562 | 1          | 0.9562 | 0 | 0 | 0 | 1 Ref      |
| MN940411 | Unassigned | Unassigned | Unassigned | 87_11  | Clustered/Singleton | 1 VC_87_11   | 1  | 0      | 1          | 0      | 0 | 0 | 0 | 1 Ref      |
| MN945899 | Unassigned | Unassigned | Unassigned | 384_16 | Clustered           | 42 VC_384_16 | 42 | 0.134  | 1          | 0.134  | 0 | 0 | 0 | 0.7282 Ref |
| MN945901 | Unassigned | Unassigned | Unassigned | 244_2  | Clustered           | 11 VC_244_2  | 11 | 0.1403 | 1          | 0.1403 | 0 | 0 | 0 | 0.9818 Ref |
| MN945902 | Unassigned | Unassigned | Unassigned | 991_0  | Clustered           | 39 VC_991_0  | 39 | 0.1785 | 1          | 0.1785 | 0 | 0 | 0 | 1 Ref      |
| MN945903 | Unassigned | Unassigned | Unassigned | 384_13 | Clustered           | 33 VC_384_13 | 33 | 0.1785 | 1          | 0.1785 | 0 | 0 | 0 | 0.8769 Ref |
| MN945904 | Unassigned | Unassigned | Unassigned | 241_0  | Clustered           | 21 VC_241_0  | 21 | 0.8342 | 1          | 0.8342 | 0 | 0 | 0 | 1 Ref      |
| MN945905 | Unassigned | Unassigned | Unassigned | 895_0  | Clustered           | 25 VC_895_0  | 25 | 0.5768 | 1          | 0.5768 | 0 | 0 | 0 | 1 Ref      |
| MN953776 | Unassigned | Unassigned | Unassigned | 135_14 | Clustered           | 3 VC_135_14  | 3  | 0.0101 | 0.96146265 | 0.0097 | 0 | 0 | 0 | 1 Ref      |
| MN954399 | Unassigned | Unassigned | Unassigned | 1007_1 | Clustered           | 24 VC_1007_1 | 24 | 0.7364 | 1          | 0.7364 | 0 | 0 | 0 | 0.8877 Ref |
| MN956514 | Unassigned | Unassigned | Unassigned | 198_25 | Clustered/Singleton | 1 VC_198_25  | 1  | 0      | 1          | 0      | 0 | 0 | 0 | 1 Ref      |
| MN958086 | Unassigned | Unassigned | Unassigned | 1007_1 | Clustered           | 24 VC_1007_1 | 24 | 0.7364 | 1          | 0.7364 | 0 | 0 | 0 | 0.8877 Ref |
| MN966730 | Unassigned | Unassigned | Unassigned | 1007_1 | Clustered           | 24 VC_1007_1 | 24 | 0.7364 | 1          | 0.7364 | 0 | 0 | 0 | 0.8877 Ref |
| MN966731 | Unassigned | Unassigned | Unassigned | 1007_1 | Clustered           | 24 VC_1007_1 | 24 | 0.7364 | 1          | 0.7364 | 0 | 0 | 0 | 0.8877 Ref |
| MN966732 | Unassigned | Unassigned | Unassigned | 1007_1 | Clustered           | 24 VC_1007_1 | 24 | 0.7364 | 1          | 0.7364 | 0 | 0 | 0 | 0.8877 Ref |
| MN970211 | Unassigned | Unassigned | Unassigned | 198_13 | Clustered           | 4 VC_198_13  | 4  | 0.0214 | 0.99996706 | 0.0214 | 0 | 0 | 0 | 0.6667 Ref |
| MN974282 | Unassigned | Unassigned | Unassigned | 861_0  | Clustered           | 29 VC_861_0  | 29 | 0.9954 | 1          | 0.9954 | 0 | 0 | 0 | 1 Ref      |
| MN988459 | Unassigned | Unassigned | Unassigned | 915_0  | Clustered           | 2 VC_915_0   | 2  | 0.1365 | 0.95352335 | 0.1302 | 0 | 0 | 0 | 1 Ref      |
| MN988460 | Unassigned | Unassigned | Unassigned | 1468_0 | Clustered           | 28 VC_1468_0 | 28 | 0.7511 | 1          | 0.7511 | 0 | 0 | 0 | 1 Ref      |
| MN988461 | Unassigned | Unassigned | Unassigned | 1482_0 | Clustered           | 4 VC_1482_0  | 4  | 1      | 0          | 0      | 0 | 0 | 0 | 1 Ref      |
| MN988462 | Unassigned | Unassigned | Unassigned | 1482_0 | Clustered           | 4 VC_1482_0  | 4  | 1      | 0          | 0      | 0 | 0 | 0 | 1 Ref      |
| MN988463 | Unassigned | Unassigned | Unassigned | 1482_0 | Clustered           | 4 VC_1482_0  | 4  | 1      | 0          | 0      | 0 | 0 | 0 | 1 Ref      |
| MN988465 | Unassigned | Unassigned | Unassigned | 482_0  | Clustered           | 4 VC_482_0   | 4  | 0.1424 | 0.99998478 | 0.1424 | 0 | 0 | 0 | 1 Ref      |
| MN988466 | Unassigned | Unassigned | Unassigned | 1020_0 | Clustered           | 22 VC_1020_0 | 22 | 0.895  | 1          | 0.895  | 0 | 0 | 0 | 1 Ref      |
| MN988467 | Unassigned | Unassigned | Unassigned | 1468_0 | Clustered           | 28 VC_1468_0 | 28 | 0.7511 | 1          | 0.7511 | 0 | 0 | 0 | 1 Ref      |
| MN988468 | Unassigned | Unassigned | Unassigned | 1086_0 | Clustered           | 2 VC_1086_0  | 2  | 0.4283 | 0.94398033 | 0.4043 | 0 | 0 | 0 | 1 Ref      |
| MN988469 | Unassigned | Unassigned | Unassigned | 1468_0 | Clustered           | 28 VC_1468_0 | 28 | 0.7511 | 1          | 0.7511 | 0 | 0 | 0 | 1 Ref      |
| MN988470 | Unassigned | Unassigned | Unassigned | 1006_0 | Clustered           | 9 VC_1006_0  | 9  | 0.9673 | 1          | 0.9673 | 0 | 0 | 0 | 1 Ref      |
| MN988471 | Unassigned | Unassigned | Unassigned | 1468_0 | Clustered           | 28 VC_1468_0 | 28 | 0.7511 | 1          | 0.7511 | 0 | 0 | 0 | 1 Ref      |
| MN988472 | Unassigned | Unassigned | Unassigned | 1482_0 | Clustered           | 4 VC_1482_0  | 4  | 1      | 0          | 0      | 0 | 0 | 0 | 1 Ref      |
| MN988473 | Unassigned | Unassigned | Unassigned | 1468_0 | Clustered           | 28 VC_1468_0 | 28 | 0.7511 | 1          | 0.7511 | 0 | 0 | 0 | 1 Ref      |
| MN988474 | Unassigned | Unassigned | Unassigned | 1468_0 | Clustered           | 28 VC_1468_0 | 28 | 0.7511 | 1          | 0.7511 | 0 | 0 | 0 | 1 Ref      |
| MN988475 | Unassigned | Unassigned | Unassigned | 1468_0 | Clustered           | 28 VC_1468_0 | 28 | 0.7511 | 1          | 0.7511 | 0 | 0 | 0 | 1 Ref      |
| MN988478 | Unassigned | Unassigned | Unassigned | 1468_0 | Clustered           | 28 VC_1468_0 | 28 | 0.7511 | 1          | 0.7511 | 0 | 0 | 0 | 1 Ref      |
| MN988479 | Unassigned | Unassigned | Unassigned | 1468_0 | Clustered           | 28 VC_1468_0 | 28 | 0.7511 | 1          | 0.7511 | 0 | 0 | 0 | 1 Ref      |
| MN988480 | Unassigned | Unassigned | Unassigned | 1468_0 | Clustered           | 28 VC_1468_0 | 28 | 0.7511 | 1          | 0.7511 | 0 | 0 | 0 | 1 Ref      |
| MN988481 | Unassigned | Unassigned | Unassigned | 1468_0 | Clustered           | 28 VC_1468_0 | 28 | 0.7511 | 1          | 0.7511 | 0 | 0 | 0 | 1 Ref      |
| MN988482 | Unassigned | Unassigned | Unassigned | 980_0  | Clustered           | 11 VC_980_0  | 11 | 0.7333 | 1          | 0.7333 | 0 | 0 | 0 | 1 Ref      |
| MN988484 | Unassigned | Unassigned | Unassigned | 1006_0 | Clustered           | 9 VC_1006_0  | 9  | 0.9673 | 1          | 0.9673 | 0 | 0 | 0 | 1 Ref      |
| MN988485 | Unassigned | Unassigned | Unassigned | 1483_0 | Clustered           | 2 VC_1483_0  | 2  | 1      | 1          | 1      | 0 | 0 | 0 | 1 Ref      |
| MN988486 | Unassigned | Unassigned | Unassigned | 1093_4 | Clustered           | 6 VC_1093_4  | 6  | 0.2431 | 0.99795925 | 0.2426 | 0 | 0 | 0 | 1 Ref      |
| MN988488 | Unassigned | Unassigned | Unassigned | 1020_0 | Clustered           | 22 VC_1020_0 | 22 | 0.895  | 1          | 0.895  | 0 | 0 | 0 | 1 Ref      |
| MN988489 | Unassigned | Unassigned | Unassigned | 1468_0 | Clustered           | 28 VC_1468_0 | 28 | 0.7511 | 1          | 0.7511 | 0 | 0 | 0 | 1 Ref      |
| MN988490 | Unassigned | Unassigned | Unassigned | 793_0  | Clustered           | 2 VC_793_0   | 2  | 0.7591 | 0.91609097 | 0.6954 | 0 | 0 | 0 | 1 Ref      |
| MN988491 | Unassigned | Unassigned | Unassigned | 1468_0 | Clustered           | 28 VC_1468_0 | 28 | 0.7511 | 1          | 0.7511 | 0 | 0 | 0 | 1 Ref      |
| MN988492 | Unassigned | Unassigned | Unassigned | 1020_0 | Clustered           | 22 VC_1020_0 | 22 | 0.895  | 1          | 0.895  | 0 | 0 | 0 | 1 Ref      |
| MN988493 | Unassigned | Unassigned | Unassigned | 1020_0 | Clustered           | 22 VC_1020_0 | 22 | 0.895  | 1          | 0.895  | 0 | 0 | 0 | 1 Ref      |
| MN988494 | Unassigned | Unassigned | Unassigned | 1468_0 | Clustered           | 28 VC_1468_0 | 28 | 0.7511 | 1          | 0.7511 | 0 | 0 | 0 | 1 Ref      |



|          |            |            |            |         |                     |              |    |        |            |        |   |   |   |            |
|----------|------------|------------|------------|---------|---------------------|--------------|----|--------|------------|--------|---|---|---|------------|
| MN988495 | Unassigned | Unassigned | Unassigned | 1006_0  | Clustered           | 9 VC_1006_0  | 9  | 0.9673 | 1          | 0.9673 | 0 | 0 | 0 | 1 Ref      |
| MN988496 | Unassigned | Unassigned | Unassigned | 792_0   | Clustered           | 5 VC_792_0   | 5  | 0.8313 | 0.99999405 | 0.8313 | 0 | 0 | 0 | 1 Ref      |
| MN988498 | Unassigned | Unassigned | Unassigned | 1468_0  | Clustered           | 28 VC_1468_0 | 28 | 0.7511 | 1          | 0.7511 | 0 | 0 | 0 | 1 Ref      |
| MN988499 | Unassigned | Unassigned | Unassigned | 1468_0  | Clustered           | 28 VC_1468_0 | 28 | 0.7511 | 1          | 0.7511 | 0 | 0 | 0 | 1 Ref      |
| MN988500 | Unassigned | Unassigned | Unassigned | 980_0   | Clustered           | 11 VC_980_0  | 11 | 0.7333 | 1          | 0.7333 | 0 | 0 | 0 | 1 Ref      |
| MN988501 | Unassigned | Unassigned | Unassigned | 980_0   | Clustered           | 11 VC_980_0  | 11 | 0.7333 | 1          | 0.7333 | 0 | 0 | 0 | 1 Ref      |
| MN988502 | Unassigned | Unassigned | Unassigned | 793_0   | Clustered           | 2 VC_793_0   | 2  | 0.7591 | 0.91600907 | 0.6954 | 0 | 0 | 0 | 1 Ref      |
| MN988503 | Unassigned | Unassigned | Unassigned | 1468_0  | Clustered           | 28 VC_1468_0 | 28 | 0.7511 | 1          | 0.7511 | 0 | 0 | 0 | 1 Ref      |
| MN988504 | Unassigned | Unassigned | Unassigned | 1468_0  | Clustered           | 28 VC_1468_0 | 28 | 0.7511 | 1          | 0.7511 | 0 | 0 | 0 | 1 Ref      |
| MN988505 | Unassigned | Unassigned | Unassigned | 739_1   | Clustered           | 6 VC_739_1   | 6  | 0.434  | 1          | 0.434  | 0 | 0 | 0 | 1 Ref      |
| MN988506 | Unassigned | Unassigned | Unassigned | 739_1   | Clustered           | 6 VC_739_1   | 6  | 0.434  | 1          | 0.434  | 0 | 0 | 0 | 1 Ref      |
| MN988507 | Unassigned | Unassigned | Unassigned | 776_0   | Clustered           | 3 VC_776_0   | 3  | 0.4679 | 0.9981936  | 0.4671 | 0 | 0 | 0 | 1 Ref      |
| MN988508 | Unassigned | Unassigned | Unassigned | 980_0   | Clustered           | 11 VC_980_0  | 11 | 0.7333 | 1          | 0.7333 | 0 | 0 | 0 | 1 Ref      |
| MN988509 | Unassigned | Unassigned | Unassigned | 1093_4  | Clustered           | 6 VC_1093_4  | 6  | 0.2431 | 0.99795925 | 0.2426 | 0 | 0 | 0 | 1 Ref      |
| MN988510 | Unassigned | Unassigned | Unassigned | 776_0   | Clustered           | 3 VC_776_0   | 3  | 0.4679 | 0.9981936  | 0.4671 | 0 | 0 | 0 | 1 Ref      |
| MN988511 | Unassigned | Unassigned | Unassigned | 1468_0  | Clustered           | 28 VC_1468_0 | 28 | 0.7511 | 1          | 0.7511 | 0 | 0 | 0 | 1 Ref      |
| MN988512 | Unassigned | Unassigned | Unassigned | 1020_0  | Clustered           | 22 VC_1020_0 | 22 | 0.895  | 1          | 0.895  | 0 | 0 | 0 | 1 Ref      |
| MN988513 | Unassigned | Unassigned | Unassigned | 1020_0  | Clustered           | 22 VC_1020_0 | 22 | 0.895  | 1          | 0.895  | 0 | 0 | 0 | 1 Ref      |
| MN988514 | Unassigned | Unassigned | Unassigned | 1020_0  | Clustered           | 22 VC_1020_0 | 22 | 0.895  | 1          | 0.895  | 0 | 0 | 0 | 1 Ref      |
| MN988515 | Unassigned | Unassigned | Unassigned | 70_0    | Clustered           | 5 VC_70_0    | 5  | 0.9939 | 0.99995803 | 0.9939 | 0 | 0 | 0 | 1 Ref      |
| MN988516 | Unassigned | Unassigned | Unassigned | 1086_0  | Clustered           | 2 VC_1086_0  | 2  | 0.4283 | 0.94398033 | 0.4043 | 0 | 0 | 0 | 1 Ref      |
| MN988518 | Unassigned | Unassigned | Unassigned | 1468_0  | Clustered           | 28 VC_1468_0 | 28 | 0.7511 | 1          | 0.7511 | 0 | 0 | 0 | 1 Ref      |
| MN988520 | Unassigned | Unassigned | Unassigned | 1093_4  | Clustered           | 6 VC_1093_4  | 6  | 0.2431 | 0.99795925 | 0.2426 | 0 | 0 | 0 | 1 Ref      |
| MN988521 | Unassigned | Unassigned | Unassigned | 1196_0  | Clustered           | 7 VC_1196_0  | 7  | 0.6485 | 1          | 0.6485 | 0 | 0 | 0 | 1 Ref      |
| MN988522 | Unassigned | Unassigned | Unassigned | 1196_0  | Clustered           | 7 VC_1196_0  | 7  | 0.6485 | 1          | 0.6485 | 0 | 0 | 0 | 1 Ref      |
| MN988523 | Unassigned | Unassigned | Unassigned | 1196_0  | Clustered           | 7 VC_1196_0  | 7  | 0.6485 | 1          | 0.6485 | 0 | 0 | 0 | 1 Ref      |
| MN988524 | Unassigned | Unassigned | Unassigned | 1196_0  | Clustered           | 7 VC_1196_0  | 7  | 0.6485 | 1          | 0.6485 | 0 | 0 | 0 | 1 Ref      |
| MN988525 | Unassigned | Unassigned | Unassigned | 1196_0  | Clustered           | 7 VC_1196_0  | 7  | 0.6485 | 1          | 0.6485 | 0 | 0 | 0 | 1 Ref      |
| MN988526 | Unassigned | Unassigned | Unassigned | 354_0   | Clustered           | 2 VC_354_0   | 2  | 0.181  | 0.93411407 | 0.1691 | 0 | 0 | 0 | 1 Ref      |
| MN988527 | Unassigned | Unassigned | Unassigned | 776_0   | Clustered           | 3 VC_776_0   | 3  | 0.4679 | 0.9981936  | 0.4671 | 0 | 0 | 0 | 1 Ref      |
| MN988528 | Unassigned | Unassigned | Unassigned | 1020_0  | Clustered           | 22 VC_1020_0 | 22 | 0.895  | 1          | 0.895  | 0 | 0 | 0 | 1 Ref      |
| MN988529 | Unassigned | Unassigned | Unassigned | 1020_0  | Clustered           | 22 VC_1020_0 | 22 | 0.895  | 1          | 0.895  | 0 | 0 | 0 | 1 Ref      |
| MN988530 | Unassigned | Unassigned | Unassigned | 980_0   | Clustered           | 11 VC_980_0  | 11 | 0.7333 | 1          | 0.7333 | 0 | 0 | 0 | 1 Ref      |
| MN988531 | Unassigned | Unassigned | Unassigned | 1006_0  | Clustered           | 9 VC_1006_0  | 9  | 0.9673 | 1          | 0.9673 | 0 | 0 | 0 | 1 Ref      |
| MN988532 | Unassigned | Unassigned | Unassigned | 1093_4  | Clustered           | 6 VC_1093_4  | 6  | 0.2431 | 0.99795925 | 0.2426 | 0 | 0 | 0 | 1 Ref      |
| MN988533 | Unassigned | Unassigned | Unassigned | 939_0   | Clustered           | 3 VC_939_0   | 3  | 0.5055 | 0.9972453  | 0.5041 | 0 | 0 | 0 | 1 Ref      |
| MN988534 | Unassigned | Unassigned | Unassigned | 1093_4  | Clustered           | 6 VC_1093_4  | 6  | 0.2431 | 0.99795925 | 0.2426 | 0 | 0 | 0 | 1 Ref      |
| MN988535 | Unassigned | Unassigned | Unassigned | 70_0    | Clustered           | 5 VC_70_0    | 5  | 0.9939 | 0.99995803 | 0.9939 | 0 | 0 | 0 | 1 Ref      |
| MN988536 | Unassigned | Unassigned | Unassigned | 969_0   | Clustered           | 2 VC_969_0   | 2  | 0.7027 | 0.72985431 | 0.5129 | 0 | 0 | 0 | 1 Ref      |
| MN988537 | Unassigned | Unassigned | Unassigned | 1006_0  | Clustered           | 9 VC_1006_0  | 9  | 0.9673 | 1          | 0.9673 | 0 | 0 | 0 | 1 Ref      |
| MN988538 | Unassigned | Unassigned | Unassigned | 939_0   | Clustered           | 3 VC_939_0   | 3  | 0.5055 | 0.9972453  | 0.5041 | 0 | 0 | 0 | 1 Ref      |
| MN988540 | Unassigned | Unassigned | Unassigned | 70_0    | Clustered           | 5 VC_70_0    | 5  | 0.9939 | 0.99995803 | 0.9939 | 0 | 0 | 0 | 1 Ref      |
| MN988541 | Unassigned | Unassigned | Unassigned | 482_0   | Clustered           | 4 VC_482_0   | 4  | 0.1424 | 0.99998478 | 0.1424 | 0 | 0 | 0 | 1 Ref      |
| MN988543 | Unassigned | Unassigned | Unassigned | 739_1   | Clustered           | 6 VC_739_1   | 6  | 0.434  | 1          | 0.434  | 0 | 0 | 0 | 1 Ref      |
| MN988544 | Unassigned | Unassigned | Unassigned | 1006_0  | Clustered           | 9 VC_1006_0  | 9  | 0.9673 | 1          | 0.9673 | 0 | 0 | 0 | 1 Ref      |
| MN988545 | Unassigned | Unassigned | Unassigned | 980_0   | Clustered           | 11 VC_980_0  | 11 | 0.7333 | 1          | 0.7333 | 0 | 0 | 0 | 1 Ref      |
| MN988546 | Unassigned | Unassigned | Unassigned | 1006_0  | Clustered           | 9 VC_1006_0  | 9  | 0.9673 | 1          | 0.9673 | 0 | 0 | 0 | 1 Ref      |
| MN988547 | Unassigned | Unassigned | Unassigned | 739_1   | Clustered           | 6 VC_739_1   | 6  | 0.434  | 1          | 0.434  | 0 | 0 | 0 | 1 Ref      |
| MN988548 | Unassigned | Unassigned | Unassigned | 739_1   | Clustered           | 6 VC_739_1   | 6  | 0.434  | 1          | 0.434  | 0 | 0 | 0 | 1 Ref      |
| MN988549 | Unassigned | Unassigned | Unassigned | 980_0   | Clustered           | 11 VC_980_0  | 11 | 0.7333 | 1          | 0.7333 | 0 | 0 | 0 | 1 Ref      |
| MN988550 | Unassigned | Unassigned | Unassigned | 1483_0  | Clustered           | 2 VC_1483_0  | 2  | 1      | 1          | 1      | 0 | 0 | 0 | 1 Ref      |
| MN988552 | Unassigned | Unassigned | Unassigned | 1023_0  | Clustered           | 3 VC_1023_0  | 3  | 0.6263 | 0.99819562 | 0.6252 | 0 | 0 | 0 | 1 Ref      |
| MN988553 | Unassigned | Unassigned | Unassigned | 1093_4  | Clustered           | 6 VC_1093_4  | 6  | 0.2431 | 0.99795925 | 0.2426 | 0 | 0 | 0 | 1 Ref      |
| MN988554 | Unassigned | Unassigned | Unassigned | 482_0   | Clustered           | 4 VC_482_0   | 4  | 0.1424 | 0.99998478 | 0.1424 | 0 | 0 | 0 | 1 Ref      |
| MN988556 | Unassigned | Unassigned | Unassigned | 354_0   | Clustered           | 2 VC_354_0   | 2  | 0.181  | 0.93411407 | 0.1691 | 0 | 0 | 0 | 1 Ref      |
| MN988557 | Unassigned | Unassigned | Unassigned | 1006_0  | Clustered           | 9 VC_1006_0  | 9  | 0.9673 | 1          | 0.9673 | 0 | 0 | 0 | 1 Ref      |
| MN988558 | Unassigned | Unassigned | Unassigned | 915_0   | Clustered           | 2 VC_915_0   | 2  | 0.1365 | 0.95352335 | 0.1302 | 0 | 0 | 0 | 1 Ref      |
| MN988559 | Unassigned | Unassigned | Unassigned | 1196_0  | Clustered           | 7 VC_1196_0  | 7  | 0.6485 | 1          | 0.6485 | 0 | 0 | 0 | 1 Ref      |
| MN988560 | Unassigned | Unassigned | Unassigned | 1196_1  | Clustered/Singleton | 1 VC_1196_1  | 1  | 0      | 1          | 0      | 0 | 0 | 0 | 1 Ref      |
| MN988561 | Unassigned | Unassigned | Unassigned | 1196_0  | Clustered           | 7 VC_1196_0  | 7  | 0.6485 | 1          | 0.6485 | 0 | 0 | 0 | 1 Ref      |
| MN994275 | Unassigned | Unassigned | Unassigned | 1278_0  | Clustered           | 19 VC_1278_0 | 19 | 1      | 1          | 1      | 0 | 0 | 0 | 1 Ref      |
| MN994496 | Unassigned | Unassigned | Unassigned | 198_15  | Clustered           | 3 VC_198_15  | 3  | 0.0144 | 0.99754982 | 0.0144 | 0 | 0 | 0 | 0.6667 Ref |
| MN994497 | Unassigned | Unassigned | Unassigned | 290_185 | Clustered/Singleton | 1 VC_290_185 | 1  | 0      | 1          | 0      | 0 | 0 | 0 | 1 Ref      |
| MN994498 | Unassigned | Unassigned | Unassigned | 340_10  | Clustered/Singleton | 1 VC_340_10  | 1  | 0      | 1          | 0      | 0 | 0 | 0 | 1 Ref      |
| MN994499 | Unassigned | Unassigned | Unassigned | 340_5   | Clustered/Singleton | 1 VC_340_5   | 1  | 0      | 1          | 0      | 0 | 0 | 0 | 1 Ref      |
| MN994500 | Unassigned | Unassigned | Unassigned | 603_0   | Clustered           | 28 VC_603_0  | 28 | 0.7692 | 1          | 0.7692 | 0 | 0 | 0 | 1 Ref      |
| MN994501 | Unassigned | Unassigned | Unassigned | 199_16  | Clustered           | 12 VC_199_16 | 12 | 0.064  | 1          | 0.064  | 0 | 0 | 0 | 0.9394 Ref |
| MN994502 | Unassigned | Unassigned | Unassigned | 198_13  | Clustered           | 4 VC_198_13  | 4  | 0.0214 | 0.99996706 | 0.0214 | 0 | 0 | 0 | 0.6667 Ref |
| MN994503 | Unassigned | Unassigned | Unassigned | 340_8   | Clustered           | 2 VC_340_8   | 2  | 0.0048 | 0.95654014 | 0.0046 | 0 | 0 | 0 | 1 Ref      |
| MN994504 | Unassigned | Unassigned | Unassigned | 198_3   | Clustered/Singleton | 1 VC_198_3   | 1  | 0      | 1          | 0      | 0 | 0 | 0 | 1 Ref      |
| MN996301 | Unassigned | Unassigned | Unassigned | 166_0   | Clustered           | 2 VC_166_0   | 2  | 0.4832 | 0.94544348 | 0.4568 | 0 | 0 | 0 | 1 Ref      |
| MPU46938 | Unassigned | Unassigned | Unassigned | 574_0   | Clustered           | 2 VC_574_0   | 2  | 0.2216 | 0.9525409  | 0.2111 | 0 | 0 | 0 | 1 Ref      |
| MT001829 | Unassigned | Unassigned | Unassigned | 170_0   | Clustered           | 3 VC_170_0   | 3  | 0.0298 | 0.82983726 | 0.0247 | 0 | 0 | 0 | 1 Ref      |
| MT002875 | Unassigned | Unassigned | Unassigned | 927_0   | Clustered           | 5 VC_927_0   | 5  | 0.4988 | 0.99999981 | 0.4988 | 0 | 0 | 0 | 1 Ref      |
| MT002975 | Unassigned | Unassigned | Unassigned | 908_0   | Clustered           | 36 VC_908_0  | 36 | 0.9943 | 1          | 0.9943 | 0 | 0 | 0 | 1 Ref      |
| MT004791 | Unassigned | Unassigned | Unassigned | 199_5   | Clustered           | 6 VC_199_5   | 6  | 0.0283 | 0.99999992 | 0.0283 | 0 | 0 | 0 | 1 Ref      |
| MT006214 | Unassigned | Unassigned | Unassigned | 691_0   | Clustered           | 18 VC_691_0  | 18 | 0.6865 | 1          | 0.6865 | 0 | 0 | 0 | 0.9477 Ref |
| MT006233 | Unassigned | Unassigned | Unassigned | 762_0   | Clustered           | 4 VC_762_0   | 4  | 0.4469 | 0.99996485 | 0.4468 | 0 | 0 | 0 | 1 Ref      |
| MT006234 | Unassigned | Unassigned | Unassigned | 1485_0  | Clustered           | 3 VC_1485_0  | 3  | 0.7417 | 0.9595722  | 0.7117 | 0 | 0 | 0 | 1 Ref      |
| MT006235 | Unassigned | Unassigned | Unassigned | 1485_0  | Clustered           | 3 VC_1485_0  | 3  | 0.7417 | 0.9595722  | 0.7117 | 0 | 0 | 0 | 1 Ref      |
| MT006236 | Unassigned | Unassigned | Unassigned | 826_0   | Clustered           | 7 VC_826_0   | 7  | 0.0509 | 0.99909926 | 0.0508 | 0 | 0 | 0 | 1 Ref      |



|          |            |            |            |        |           |              |     |        |            |  |        |   |   |   |            |
|----------|------------|------------|------------|--------|-----------|--------------|-----|--------|------------|--|--------|---|---|---|------------|
| MT006237 | Unassigned | Unassigned | Unassigned | 879_0  | Clustered | 5 VC_879_0   | 5   | 0.3611 | 0.99976884 |  | 0.3611 | 0 | 0 | 0 | 1 Ref      |
| MT006238 | Unassigned | Unassigned | Unassigned | 762_0  | Clustered | 4 VC_762_0   | 4   | 0.4469 | 0.99996485 |  | 0.4468 | 0 | 0 | 0 | 1 Ref      |
| MT006239 | Unassigned | Unassigned | Unassigned | 762_0  | Clustered | 4 VC_762_0   | 4   | 0.4469 | 0.99996485 |  | 0.4468 | 0 | 0 | 0 | 1 Ref      |
| MT006240 | Unassigned | Unassigned | Unassigned | 762_0  | Clustered | 4 VC_762_0   | 4   | 0.4469 | 0.99996485 |  | 0.4468 | 0 | 0 | 0 | 1 Ref      |
| MT012302 | Unassigned | Unassigned | Unassigned | 127_0  | Clustered | 17 VC_127_0  | 17  | 0.9222 | 1          |  | 0.9222 | 0 | 0 | 0 | 1 Ref      |
| MT012729 | Unassigned | Unassigned | Unassigned | 560_0  | Clustered | 15 VC_560_0  | 15  | 0.2846 | 1          |  | 0.2846 | 0 | 0 | 0 | 1 Ref      |
| MT012730 | Unassigned | Unassigned | Unassigned | 440_0  | Clustered | 33 VC_440_0  | 33  | 0.992  | 1          |  | 0.992  | 0 | 0 | 0 | 1 Ref      |
| MT013111 | Unassigned | Unassigned | Unassigned | 9_0    | Clustered | 38 VC_9_0    | 38  | 0.4859 | 1          |  | 0.4859 | 0 | 0 | 0 | 1 Ref      |
| MT023084 | Unassigned | Unassigned | Unassigned | 596_0  | Clustered | 4 VC_596_0   | 4   | 0.0604 | 0.99998766 |  | 0.0604 | 0 | 0 | 0 | 1 Ref      |
| MT024860 | Unassigned | Unassigned | Unassigned | 1287_0 | Clustered | 44 VC_1287_0 | 44  | 1      | 1          |  | 1      | 0 | 0 | 0 | 1 Ref      |
| MT024861 | Unassigned | Unassigned | Unassigned | 230_0  | Clustered | 38 VC_230_0  | 38  | 0.9076 | 1          |  | 0.9076 | 0 | 0 | 0 | 1 Ref      |
| MT024863 | Unassigned | Unassigned | Unassigned | 1425_0 | Clustered | 6 VC_1425_0  | 6   | 0.2364 | 1          |  | 0.2364 | 0 | 0 | 0 | 1 Ref      |
| MT024864 | Unassigned | Unassigned | Unassigned | 1296_0 | Clustered | 82 VC_1296_0 | 82  | 0.7938 | 1          |  | 0.7938 | 0 | 0 | 0 | 1 Ref      |
| MT024865 | Unassigned | Unassigned | Unassigned | 1115_1 | Clustered | 2 VC_1115_1  | 2   | 0.0256 | 0.95128042 |  | 0.0243 | 0 | 0 | 0 | 1 Ref      |
| MT024866 | Unassigned | Unassigned | Unassigned | 537_0  | Clustered | 39 VC_537_0  | 39  | 0.8148 | 1          |  | 0.8148 | 0 | 0 | 0 | 1 Ref      |
| MT024867 | Unassigned | Unassigned | Unassigned | 1427_0 | Clustered | 6 VC_1427_0  | 6   | 1      | 1          |  | 1      | 0 | 0 | 0 | 1 Ref      |
| MT024868 | Unassigned | Unassigned | Unassigned | 1116_0 | Clustered | 24 VC_1116_0 | 24  | 0.8376 | 1          |  | 0.8376 | 0 | 0 | 0 | 1 Ref      |
| MT024869 | Unassigned | Unassigned | Unassigned | 1250_0 | Clustered | 29 VC_1250_0 | 29  | 0.822  | 1          |  | 0.822  | 0 | 0 | 0 | 1 Ref      |
| MT024870 | Unassigned | Unassigned | Unassigned | 1427_0 | Clustered | 6 VC_1427_0  | 6   | 1      | 1          |  | 1      | 0 | 0 | 0 | 1 Ref      |
| MT024871 | Unassigned | Unassigned | Unassigned | 1250_0 | Clustered | 29 VC_1250_0 | 29  | 0.822  | 1          |  | 0.822  | 0 | 0 | 0 | 1 Ref      |
| MT024872 | Unassigned | Unassigned | Unassigned | 1115_1 | Clustered | 2 VC_1115_1  | 2   | 0.0256 | 0.95128042 |  | 0.0243 | 0 | 0 | 0 | 1 Ref      |
| MT028297 | Unassigned | Unassigned | Unassigned | 836_1  | Clustered | 4 VC_836_1   | 4   | 0.2236 | 0.99998426 |  | 0.2236 | 0 | 0 | 0 | 1 Ref      |
| MT047590 | Unassigned | Unassigned | Unassigned | 454_0  | Clustered | 4 VC_454_0   | 4   | 1      | 1          |  | 1      | 0 | 0 | 0 | 1 Ref      |
| MT066160 | Unassigned | Unassigned | Unassigned | 771_0  | Clustered | 8 VC_771_0   | 8   | 0.7491 | 1          |  | 0.7491 | 0 | 0 | 0 | 1 Ref      |
| MT074134 | Unassigned | Unassigned | Unassigned | 1043_0 | Clustered | 19 VC_1043_0 | 19  | 0.7615 | 1          |  | 0.7615 | 0 | 0 | 0 | 1 Ref      |
| MT074135 | Unassigned | Unassigned | Unassigned | 1043_0 | Clustered | 19 VC_1043_0 | 19  | 0.7615 | 1          |  | 0.7615 | 0 | 0 | 0 | 1 Ref      |
| MT074136 | Unassigned | Unassigned | Unassigned | 1054_1 | Clustered | 8 VC_1054_1  | 8   | 0.3937 | 1          |  | 0.3937 | 0 | 0 | 0 | 0.9286 Ref |
| MT074137 | Unassigned | Unassigned | Unassigned | 1488_0 | Clustered | 6 VC_1488_0  | 6   | 0.7842 | 1          |  | 0.7842 | 0 | 0 | 0 | 1 Ref      |
| MT074138 | Unassigned | Unassigned | Unassigned | 1054_1 | Clustered | 8 VC_1054_1  | 8   | 0.3937 | 1          |  | 0.3937 | 0 | 0 | 0 | 0.9286 Ref |
| MT074139 | Unassigned | Unassigned | Unassigned | 1488_0 | Clustered | 6 VC_1488_0  | 6   | 0.7842 | 1          |  | 0.7842 | 0 | 0 | 0 | 1 Ref      |
| MT074140 | Unassigned | Unassigned | Unassigned | 1488_0 | Clustered | 6 VC_1488_0  | 6   | 0.7842 | 1          |  | 0.7842 | 0 | 0 | 0 | 1 Ref      |
| MT074141 | Unassigned | Unassigned | Unassigned | 1488_0 | Clustered | 6 VC_1488_0  | 6   | 0.7842 | 1          |  | 0.7842 | 0 | 0 | 0 | 1 Ref      |
| MT074142 | Unassigned | Unassigned | Unassigned | 1488_0 | Clustered | 6 VC_1488_0  | 6   | 0.7842 | 1          |  | 0.7842 | 0 | 0 | 0 | 1 Ref      |
| MT074143 | Unassigned | Unassigned | Unassigned | 1043_0 | Clustered | 19 VC_1043_0 | 19  | 0.7615 | 1          |  | 0.7615 | 0 | 0 | 0 | 1 Ref      |
| MT074144 | Unassigned | Unassigned | Unassigned | 1043_0 | Clustered | 19 VC_1043_0 | 19  | 0.7615 | 1          |  | 0.7615 | 0 | 0 | 0 | 1 Ref      |
| MT074145 | Unassigned | Unassigned | Unassigned | 1043_0 | Clustered | 19 VC_1043_0 | 19  | 0.7615 | 1          |  | 0.7615 | 0 | 0 | 0 | 1 Ref      |
| MT074146 | Unassigned | Unassigned | Unassigned | 1488_0 | Clustered | 6 VC_1488_0  | 6   | 0.7842 | 1          |  | 0.7842 | 0 | 0 | 0 | 1 Ref      |
| MT074147 | Unassigned | Unassigned | Unassigned | 1043_0 | Clustered | 19 VC_1043_0 | 19  | 0.7615 | 1          |  | 0.7615 | 0 | 0 | 0 | 1 Ref      |
| MT074148 | Unassigned | Unassigned | Unassigned | 1043_0 | Clustered | 19 VC_1043_0 | 19  | 0.7615 | 1          |  | 0.7615 | 0 | 0 | 0 | 1 Ref      |
| MT074149 | Unassigned | Unassigned | Unassigned | 1043_0 | Clustered | 19 VC_1043_0 | 19  | 0.7615 | 1          |  | 0.7615 | 0 | 0 | 0 | 1 Ref      |
| MT074150 | Unassigned | Unassigned | Unassigned | 1043_0 | Clustered | 19 VC_1043_0 | 19  | 0.7615 | 1          |  | 0.7615 | 0 | 0 | 0 | 1 Ref      |
| MT074151 | Unassigned | Unassigned | Unassigned | 1043_0 | Clustered | 19 VC_1043_0 | 19  | 0.7615 | 1          |  | 0.7615 | 0 | 0 | 0 | 1 Ref      |
| MT074152 | Unassigned | Unassigned | Unassigned | 1043_0 | Clustered | 19 VC_1043_0 | 19  | 0.7615 | 1          |  | 0.7615 | 0 | 0 | 0 | 1 Ref      |
| MT074153 | Unassigned | Unassigned | Unassigned | 1043_0 | Clustered | 19 VC_1043_0 | 19  | 0.7615 | 1          |  | 0.7615 | 0 | 0 | 0 | 1 Ref      |
| MT074154 | Unassigned | Unassigned | Unassigned | 1043_0 | Clustered | 19 VC_1043_0 | 19  | 0.7615 | 1          |  | 0.7615 | 0 | 0 | 0 | 1 Ref      |
| MT074155 | Unassigned | Unassigned | Unassigned | 1043_0 | Clustered | 19 VC_1043_0 | 19  | 0.7615 | 1          |  | 0.7615 | 0 | 0 | 0 | 1 Ref      |
| MT074156 | Unassigned | Unassigned | Unassigned | 1043_0 | Clustered | 19 VC_1043_0 | 19  | 0.7615 | 1          |  | 0.7615 | 0 | 0 | 0 | 1 Ref      |
| MT074157 | Unassigned | Unassigned | Unassigned | 1043_0 | Clustered | 19 VC_1043_0 | 19  | 0.7615 | 1          |  | 0.7615 | 0 | 0 | 0 | 1 Ref      |
| MT074158 | Unassigned | Unassigned | Unassigned | 1043_0 | Clustered | 19 VC_1043_0 | 19  | 0.7615 | 1          |  | 0.7615 | 0 | 0 | 0 | 1 Ref      |
| MT074159 | Unassigned | Unassigned | Unassigned | 1043_0 | Clustered | 19 VC_1043_0 | 19  | 0.7615 | 1          |  | 0.7615 | 0 | 0 | 0 | 1 Ref      |
| MT074160 | Unassigned | Unassigned | Unassigned | 1043_0 | Clustered | 19 VC_1043_0 | 19  | 0.7615 | 1          |  | 0.7615 | 0 | 0 | 0 | 1 Ref      |
| MT074429 | Unassigned | Unassigned | Unassigned | 1275_0 | Clustered | 4 VC_1275_0  | 4   | 0.747  | 0.9991311  |  | 0.7463 | 0 | 0 | 0 | 1 Ref      |
| MT074430 | Unassigned | Unassigned | Unassigned | 654_1  | Clustered | 27 VC_654_1  | 27  | 0.2571 | 1          |  | 0.2571 | 0 | 0 | 0 | 0.9858 Ref |
| MT074431 | Unassigned | Unassigned | Unassigned | 654_0  | Clustered | 115 VC_654_0 | 115 | 0.7303 | 1          |  | 0.7303 | 0 | 0 | 0 | 0.8764 Ref |
| MT074432 | Unassigned | Unassigned | Unassigned | 654_0  | Clustered | 115 VC_654_0 | 115 | 0.7303 | 1          |  | 0.7303 | 0 | 0 | 0 | 0.8764 Ref |
| MT074433 | Unassigned | Unassigned | Unassigned | 975_0  | Clustered | 40 VC_975_0  | 40  | 0.6888 | 1          |  | 0.6888 | 0 | 0 | 0 | 1 Ref      |
| MT074434 | Unassigned | Unassigned | Unassigned | 440_0  | Clustered | 33 VC_440_0  | 33  | 0.992  | 1          |  | 0.992  | 0 | 0 | 0 | 1 Ref      |
| MT074435 | Unassigned | Unassigned | Unassigned | 440_0  | Clustered | 33 VC_440_0  | 33  | 0.992  | 1          |  | 0.992  | 0 | 0 | 0 | 1 Ref      |
| MT074436 | Unassigned | Unassigned | Unassigned | 440_0  | Clustered | 33 VC_440_0  | 33  | 0.992  | 1          |  | 0.992  | 0 | 0 | 0 | 1 Ref      |
| MT074437 | Unassigned | Unassigned | Unassigned | 440_0  | Clustered | 33 VC_440_0  | 33  | 0.992  | 1          |  | 0.992  | 0 | 0 | 0 | 1 Ref      |
| MT074438 | Unassigned | Unassigned | Unassigned | 440_0  | Clustered | 33 VC_440_0  | 33  | 0.992  | 1          |  | 0.992  | 0 | 0 | 0 | 1 Ref      |
| MT074439 | Unassigned | Unassigned | Unassigned | 440_0  | Clustered | 33 VC_440_0  | 33  | 0.992  | 1          |  | 0.992  | 0 | 0 | 0 | 1 Ref      |
| MT074440 | Unassigned | Unassigned | Unassigned | 1275_0 | Clustered | 4 VC_1275_0  | 4   | 0.747  | 0.9991311  |  | 0.7463 | 0 | 0 | 0 | 1 Ref      |
| MT074441 | Unassigned | Unassigned | Unassigned | 440_0  | Clustered | 33 VC_440_0  | 33  | 0.992  | 1          |  | 0.992  | 0 | 0 | 0 | 1 Ref      |
| MT074442 | Unassigned | Unassigned | Unassigned | 440_0  | Clustered | 33 VC_440_0  | 33  | 0.992  | 1          |  | 0.992  | 0 | 0 | 0 | 1 Ref      |
| MT074443 | Unassigned | Unassigned | Unassigned | 440_0  | Clustered | 33 VC_440_0  | 33  | 0.992  | 1          |  | 0.992  | 0 | 0 | 0 | 1 Ref      |
| MT074444 | Unassigned | Unassigned | Unassigned | 440_0  | Clustered | 33 VC_440_0  | 33  | 0.992  | 1          |  | 0.992  | 0 | 0 | 0 | 1 Ref      |
| MT074445 | Unassigned | Unassigned | Unassigned | 440_0  | Clustered | 33 VC_440_0  | 33  | 0.992  | 1          |  | 0.992  | 0 | 0 | 0 | 1 Ref      |
| MT074446 | Unassigned | Unassigned | Unassigned | 440_0  | Clustered | 33 VC_440_0  | 33  | 0.992  | 1          |  | 0.992  | 0 | 0 | 0 | 1 Ref      |
| MT074447 | Unassigned | Unassigned | Unassigned | 199_30 | Clustered | 2 VC_199_30  | 2   | 0.006  | 0.95412846 |  | 0.0057 | 0 | 0 | 0 | 1 Ref      |
| MT074448 | Unassigned | Unassigned | Unassigned | 198_7  | Clustered | 7 VC_198_7   | 7   | 0.047  | 1          |  | 0.047  | 0 | 0 | 0 | 1 Ref      |
| MT074449 | Unassigned | Unassigned | Unassigned | 199_32 | Clustered | 12 VC_199_32 | 12  | 0.0676 | 1          |  | 0.0676 | 0 | 0 | 0 | 0.7576 Ref |
| MT074450 | Unassigned | Unassigned | Unassigned | 199_16 | Clustered | 12 VC_199_16 | 12  | 0.064  | 1          |  | 0.064  | 0 | 0 | 0 | 0.9394 Ref |
| MT074451 | Unassigned | Unassigned | Unassigned | 654_0  | Clustered | 115 VC_654_0 | 115 | 0.7303 | 1          |  | 0.7303 | 0 | 0 | 0 | 0.8764 Ref |
| MT074452 | Unassigned | Unassigned | Unassigned | 199_5  | Clustered | 6 VC_199_5   | 6   | 0.0283 | 0.99999992 |  | 0.0283 | 0 | 0 | 0 | 1 Ref      |
| MT074453 | Unassigned | Unassigned | Unassigned | 199_3  | Clustered | 5 VC_199_3   | 5   | 0.0229 | 0.99999699 |  | 0.0229 | 0 | 0 | 0 | 0.8 Ref    |
| MT074454 | Unassigned | Unassigned | Unassigned | 199_8  | Clustered | 2 VC_199_8   | 2   | 0.0055 | 0.91325319 |  | 0.005  | 0 | 0 | 0 | 1 Ref      |
| MT074455 | Unassigned | Unassigned | Unassigned | 199_4  | Clustered | 2 VC_199_4   | 2   | 0.0055 | 0.88232441 |  | 0.0048 | 0 | 0 | 0 | 1 Ref      |
| MT074456 | Unassigned | Unassigned | Unassigned | 199_5  | Clustered | 6 VC_199_5   | 6   | 0.0283 | 0.99999992 |  | 0.0283 | 0 | 0 | 0 | 1 Ref      |
| MT074457 | Unassigned | Unassigned | Unassigned | 199_3  | Clustered | 5 VC_199_3   | 5   | 0.0229 | 0.99999699 |  | 0.0229 | 0 | 0 | 0 | 0.8 Ref    |
| MT074458 | Unassigned | Unassigned | Unassigned | 199_16 | Clustered | 12 VC_199_16 | 12  | 0.064  | 1          |  | 0.064  | 0 | 0 | 0 | 0.9394 Ref |



|          |            |            |            |        |                     |              |     |        |            |        |   |   |   |        |     |
|----------|------------|------------|------------|--------|---------------------|--------------|-----|--------|------------|--------|---|---|---|--------|-----|
| MT074459 | Unassigned | Unassigned | Unassigned | 199_9  | Clustered           | 5 VC_199_9   | 5   | 0.0226 | 0.99999452 | 0.0226 | 0 | 0 | 0 | 0.7    | Ref |
| MT074460 | Unassigned | Unassigned | Unassigned | 199_5  | Clustered           | 6 VC_199_5   | 6   | 0.0283 | 0.99999992 | 0.0283 | 0 | 0 | 0 | 1      | Ref |
| MT074461 | Unassigned | Unassigned | Unassigned | 199_30 | Clustered           | 2 VC_199_30  | 2   | 0.006  | 0.95412846 | 0.0057 | 0 | 0 | 0 | 1      | Ref |
| MT074462 | Unassigned | Unassigned | Unassigned | 654_0  | Clustered           | 115 VC_654_0 | 115 | 0.7303 | 1          | 0.7303 | 0 | 0 | 0 | 0.8764 | Ref |
| MT074463 | Unassigned | Unassigned | Unassigned | 199_5  | Clustered           | 6 VC_199_5   | 6   | 0.0283 | 0.99999992 | 0.0283 | 0 | 0 | 0 | 1      | Ref |
| MT074464 | Unassigned | Unassigned | Unassigned | 199_12 | Clustered/Singleton | 1 VC_199_12  | 1   | 0      | 1          | 0      | 0 | 0 | 0 | 1      | Ref |
| MT074465 | Unassigned | Unassigned | Unassigned | 199_32 | Clustered           | 12 VC_199_32 | 12  | 0.0676 | 1          | 0.0676 | 0 | 0 | 0 | 0.7576 | Ref |
| MT074466 | Unassigned | Unassigned | Unassigned | 199_9  | Clustered           | 5 VC_199_9   | 5   | 0.0226 | 0.99999452 | 0.0226 | 0 | 0 | 0 | 0.7    | Ref |
| MT074467 | Unassigned | Unassigned | Unassigned | 199_7  | Clustered/Singleton | 1 VC_199_7   | 1   | 0      | 1          | 0      | 0 | 0 | 0 | 1      | Ref |
| MT074468 | Unassigned | Unassigned | Unassigned | 199_6  | Clustered/Singleton | 1 VC_199_6   | 1   | 0      | 1          | 0      | 0 | 0 | 0 | 1      | Ref |
| MT074469 | Unassigned | Unassigned | Unassigned | 135_3  | Clustered           | 3 VC_135_3   | 3   | 0.0104 | 0.99060433 | 0.0103 | 0 | 0 | 0 | 1      | Ref |
| MT074470 | Unassigned | Unassigned | Unassigned | 135_23 | Clustered/Singleton | 1 VC_135_23  | 1   | 0      | 1          | 0      | 0 | 0 | 0 | 1      | Ref |
| MT074471 | Unassigned | Unassigned | Unassigned | 135_45 | Clustered           | 2 VC_135_45  | 2   | 0.0051 | 0.94571064 | 0.0048 | 0 | 0 | 0 | 1      | Ref |
| MT074472 | Unassigned | Unassigned | Unassigned | 135_2  | Clustered/Singleton | 1 VC_135_2   | 1   | 0      | 1          | 0      | 0 | 0 | 0 | 1      | Ref |
| MT074473 | Unassigned | Unassigned | Unassigned | 654_0  | Clustered           | 115 VC_654_0 | 115 | 0.7303 | 1          | 0.7303 | 0 | 0 | 0 | 0.8764 | Ref |
| MT074474 | Unassigned | Unassigned | Unassigned | 135_41 | Clustered/Singleton | 1 VC_135_41  | 1   | 0      | 1          | 0      | 0 | 0 | 0 | 1      | Ref |
| MT074475 | Unassigned | Unassigned | Unassigned | 135_19 | Clustered           | 2 VC_135_19  | 2   | 0.005  | 0.8667049  | 0.0044 | 0 | 0 | 0 | 1      | Ref |
| MT074476 | Unassigned | Unassigned | Unassigned | 135_31 | Clustered           | 6 VC_135_31  | 6   | 0.0262 | 0.99999636 | 0.0262 | 0 | 0 | 0 | 1      | Ref |
| MT074477 | Unassigned | Unassigned | Unassigned | 135_8  | Clustered/Singleton | 1 VC_135_8   | 1   | 0      | 1          | 0      | 0 | 0 | 0 | 1      | Ref |
| MT074478 | Unassigned | Unassigned | Unassigned | 135_39 | Clustered/Singleton | 1 VC_135_39  | 1   | 0      | 1          | 0      | 0 | 0 | 0 | 1      | Ref |
| MT074479 | Unassigned | Unassigned | Unassigned | 135_47 | Clustered/Singleton | 1 VC_135_47  | 1   | 0      | 1          | 0      | 0 | 0 | 0 | 1      | Ref |
| MT074480 | Unassigned | Unassigned | Unassigned | 135_45 | Clustered           | 2 VC_135_45  | 2   | 0.0051 | 0.94571064 | 0.0048 | 0 | 0 | 0 | 1      | Ref |
| MT074481 | Unassigned | Unassigned | Unassigned | 654_0  | Clustered           | 115 VC_654_0 | 115 | 0.7303 | 1          | 0.7303 | 0 | 0 | 0 | 0.8764 | Ref |
| MT074482 | Unassigned | Unassigned | Unassigned | 654_0  | Clustered           | 115 VC_654_0 | 115 | 0.7303 | 1          | 0.7303 | 0 | 0 | 0 | 0.8764 | Ref |
| MT074483 | Unassigned | Unassigned | Unassigned | 654_0  | Clustered           | 115 VC_654_0 | 115 | 0.7303 | 1          | 0.7303 | 0 | 0 | 0 | 0.8764 | Ref |
| MT074484 | Unassigned | Unassigned | Unassigned | 654_0  | Clustered           | 115 VC_654_0 | 115 | 0.7303 | 1          | 0.7303 | 0 | 0 | 0 | 0.8764 | Ref |
| MT075871 | Unassigned | Unassigned | Unassigned | 860_0  | Clustered           | 9 VC_860_0   | 9   | 0.7723 | 1          | 0.7723 | 0 | 0 | 0 | 1      | Ref |
| MT078988 | Unassigned | Unassigned | Unassigned | 133_2  | Clustered           | 7 VC_133_2   | 7   | 0.0679 | 1          | 0.0679 | 0 | 0 | 0 | 0.9048 | Ref |
| MT080102 | Unassigned | Unassigned | Unassigned | 862_0  | Clustered           | 29 VC_862_0  | 29  | 0.8594 | 1          | 0.8594 | 0 | 0 | 0 | 1      | Ref |
| MT080103 | Unassigned | Unassigned | Unassigned | 198_29 | Clustered/Singleton | 1 VC_198_29  | 1   | 0      | 1          | 0      | 0 | 0 | 0 | 1      | Ref |
| MT080582 | Unassigned | Unassigned | Unassigned | 155_11 | Clustered           | 4 VC_155_11  | 4   | 0.0201 | 0.99981618 | 0.0201 | 0 | 0 | 0 | 1      | Ref |
| MT080583 | Unassigned | Unassigned | Unassigned | 155_11 | Clustered           | 4 VC_155_11  | 4   | 0.0201 | 0.99981618 | 0.0201 | 0 | 0 | 0 | 1      | Ref |
| MT080584 | Unassigned | Unassigned | Unassigned | 159_0  | Clustered           | 25 VC_159_0  | 25  | 0.7699 | 1          | 0.7699 | 0 | 0 | 0 | 1      | Ref |
| MT080585 | Unassigned | Unassigned | Unassigned | 155_17 | Clustered           | 4 VC_155_17  | 4   | 0.0129 | 0.99945541 | 0.0129 | 0 | 0 | 0 | 1      | Ref |
| MT080586 | Unassigned | Unassigned | Unassigned | 155_11 | Clustered           | 4 VC_155_11  | 4   | 0.0201 | 0.99981618 | 0.0201 | 0 | 0 | 0 | 1      | Ref |
| MT080587 | Unassigned | Unassigned | Unassigned | 159_0  | Clustered           | 25 VC_159_0  | 25  | 0.7699 | 1          | 0.7699 | 0 | 0 | 0 | 1      | Ref |
| MT080588 | Unassigned | Unassigned | Unassigned | 159_0  | Clustered           | 25 VC_159_0  | 25  | 0.7699 | 1          | 0.7699 | 0 | 0 | 0 | 1      | Ref |
| MT080589 | Unassigned | Unassigned | Unassigned | 155_17 | Clustered           | 4 VC_155_17  | 4   | 0.0129 | 0.99945541 | 0.0129 | 0 | 0 | 0 | 1      | Ref |
| MT080590 | Unassigned | Unassigned | Unassigned | 159_0  | Clustered           | 25 VC_159_0  | 25  | 0.7699 | 1          | 0.7699 | 0 | 0 | 0 | 1      | Ref |
| MT080591 | Unassigned | Unassigned | Unassigned | 155_17 | Clustered           | 4 VC_155_17  | 4   | 0.0129 | 0.99945541 | 0.0129 | 0 | 0 | 0 | 1      | Ref |
| MT080592 | Unassigned | Unassigned | Unassigned | 155_0  | Clustered           | 5 VC_155_0   | 5   | 0.0278 | 0.99999865 | 0.0278 | 0 | 0 | 0 | 1      | Ref |
| MT080593 | Unassigned | Unassigned | Unassigned | 155_22 | Clustered           | 2 VC_155_22  | 2   | 0.0062 | 0.92916562 | 0.0057 | 0 | 0 | 0 | 1      | Ref |
| MT080594 | Unassigned | Unassigned | Unassigned | 155_11 | Clustered           | 4 VC_155_11  | 4   | 0.0201 | 0.99981618 | 0.0201 | 0 | 0 | 0 | 1      | Ref |
| MT080595 | Unassigned | Unassigned | Unassigned | 159_0  | Clustered           | 25 VC_159_0  | 25  | 0.7699 | 1          | 0.7699 | 0 | 0 | 0 | 1      | Ref |
| MT080596 | Unassigned | Unassigned | Unassigned | 155_22 | Clustered           | 2 VC_155_22  | 2   | 0.0062 | 0.92916562 | 0.0057 | 0 | 0 | 0 | 1      | Ref |
| MT080597 | Unassigned | Unassigned | Unassigned | 155_0  | Clustered           | 5 VC_155_0   | 5   | 0.0278 | 0.99999865 | 0.0278 | 0 | 0 | 0 | 1      | Ref |
| MT080598 | Unassigned | Unassigned | Unassigned | 155_0  | Clustered           | 5 VC_155_0   | 5   | 0.0278 | 0.99999865 | 0.0278 | 0 | 0 | 0 | 1      | Ref |
| MT080599 | Unassigned | Unassigned | Unassigned | 155_0  | Clustered           | 5 VC_155_0   | 5   | 0.0278 | 0.99999865 | 0.0278 | 0 | 0 | 0 | 1      | Ref |
| MT080600 | Unassigned | Unassigned | Unassigned | 155_8  | Clustered           | 66 VC_155_8  | 66  | 0.4537 | 1          | 0.4537 | 0 | 0 | 0 | 0.8182 | Ref |
| MT080601 | Unassigned | Unassigned | Unassigned | 155_17 | Clustered           | 4 VC_155_17  | 4   | 0.0129 | 0.99945541 | 0.0129 | 0 | 0 | 0 | 1      | Ref |
| MT080602 | Unassigned | Unassigned | Unassigned | 155_8  | Clustered           | 66 VC_155_8  | 66  | 0.4537 | 1          | 0.4537 | 0 | 0 | 0 | 0.8182 | Ref |
| MT080603 | Unassigned | Unassigned | Unassigned | 155_0  | Clustered           | 5 VC_155_0   | 5   | 0.0278 | 0.99999865 | 0.0278 | 0 | 0 | 0 | 1      | Ref |
| MT084350 | Unassigned | Unassigned | Unassigned | 287_0  | Clustered           | 2 VC_287_0   | 2   | 0.2918 | 0.9525588  | 0.2779 | 0 | 0 | 0 | 1      | Ref |
| MT090077 | Unassigned | Unassigned | Unassigned | 113_0  | Clustered           | 91 VC_113_0  | 91  | 0.9584 | 1          | 0.9584 | 0 | 0 | 0 | 1      | Ref |
| MT094431 | Unassigned | Unassigned | Unassigned | 132_0  | Clustered           | 19 VC_132_0  | 19  | 0.6051 | 1          | 0.6051 | 0 | 0 | 0 | 1      | Ref |
| MT104465 | Unassigned | Unassigned | Unassigned | 131_0  | Clustered           | 43 VC_131_0  | 43  | 0.8853 | 1          | 0.8853 | 0 | 0 | 0 | 1      | Ref |
| MT104466 | Unassigned | Unassigned | Unassigned | 131_0  | Clustered           | 43 VC_131_0  | 43  | 0.8853 | 1          | 0.8853 | 0 | 0 | 0 | 1      | Ref |
| MT104468 | Unassigned | Unassigned | Unassigned | 161_0  | Clustered           | 14 VC_161_0  | 14  | 0.6064 | 1          | 0.6064 | 0 | 0 | 0 | 1      | Ref |
| MT104469 | Unassigned | Unassigned | Unassigned | 161_0  | Clustered           | 14 VC_161_0  | 14  | 0.6064 | 1          | 0.6064 | 0 | 0 | 0 | 1      | Ref |
| MT104470 | Unassigned | Unassigned | Unassigned | 161_0  | Clustered           | 14 VC_161_0  | 14  | 0.6064 | 1          | 0.6064 | 0 | 0 | 0 | 1      | Ref |
| MT104471 | Unassigned | Unassigned | Unassigned | 161_0  | Clustered           | 14 VC_161_0  | 14  | 0.6064 | 1          | 0.6064 | 0 | 0 | 0 | 1      | Ref |
| MT104472 | Unassigned | Unassigned | Unassigned | 161_0  | Clustered           | 14 VC_161_0  | 14  | 0.6064 | 1          | 0.6064 | 0 | 0 | 0 | 1      | Ref |
| MT104473 | Unassigned | Unassigned | Unassigned | 712_0  | Clustered           | 5 VC_712_0   | 5   | 0.828  | 0.99999971 | 0.828  | 0 | 0 | 0 | 1      | Ref |
| MT104475 | Unassigned | Unassigned | Unassigned | 712_0  | Clustered           | 5 VC_712_0   | 5   | 0.828  | 0.99999971 | 0.828  | 0 | 0 | 0 | 1      | Ref |
| MT104476 | Unassigned | Unassigned | Unassigned | 161_0  | Clustered           | 14 VC_161_0  | 14  | 0.6064 | 1          | 0.6064 | 0 | 0 | 0 | 1      | Ref |
| MT104477 | Unassigned | Unassigned | Unassigned | 161_0  | Clustered           | 14 VC_161_0  | 14  | 0.6064 | 1          | 0.6064 | 0 | 0 | 0 | 1      | Ref |
| MT108723 | Unassigned | Unassigned | Unassigned | 486_0  | Clustered           | 47 VC_486_0  | 47  | 0.9022 | 1          | 0.9022 | 0 | 0 | 0 | 1      | Ref |
| MT108724 | Unassigned | Unassigned | Unassigned | 486_0  | Clustered           | 47 VC_486_0  | 47  | 0.9022 | 1          | 0.9022 | 0 | 0 | 0 | 1      | Ref |
| MT108725 | Unassigned | Unassigned | Unassigned | 478_0  | Clustered           | 8 VC_478_0   | 8   | 0.2619 | 1          | 0.2619 | 0 | 0 | 0 | 1      | Ref |
| MT108726 | Unassigned | Unassigned | Unassigned | 81_0   | Clustered           | 41 VC_81_0   | 41  | 0.5815 | 1          | 0.5815 | 0 | 0 | 0 | 0.9805 | Ref |
| MT108727 | Unassigned | Unassigned | Unassigned | 80_7   | Clustered           | 33 VC_80_7   | 33  | 0.2156 | 1          | 0.2156 | 0 | 0 | 0 | 0.8409 | Ref |
| MT108728 | Unassigned | Unassigned | Unassigned | 78_0   | Clustered           | 20 VC_78_0   | 20  | 0.9639 | 1          | 0.9639 | 0 | 0 | 0 | 1      | Ref |
| MT108729 | Unassigned | Unassigned | Unassigned | 80_6   | Clustered           | 11 VC_80_6   | 11  | 0.0527 | 1          | 0.0527 | 0 | 0 | 0 | 0.7455 | Ref |
| MT108730 | Unassigned | Unassigned | Unassigned | 78_0   | Clustered           | 20 VC_78_0   | 20  | 0.9639 | 1          | 0.9639 | 0 | 0 | 0 | 1      | Ref |
| MT108731 | Unassigned | Unassigned | Unassigned | 478_0  | Clustered           | 8 VC_478_0   | 8   | 0.2619 | 1          | 0.2619 | 0 | 0 | 0 | 1      | Ref |
| MT110073 | Unassigned | Unassigned | Unassigned | 936_0  | Clustered           | 3 VC_936_0   | 3   | 0.3378 | 0.99823775 | 0.3372 | 0 | 0 | 0 | 1      | Ref |
| MT114158 | Unassigned | Unassigned | Unassigned | 535_1  | Clustered           | 108 VC_535_1 | 108 | 0.8479 | 1          | 0.8479 | 0 | 0 | 0 | 0.9955 | Ref |
| MT114159 | Unassigned | Unassigned | Unassigned | 834_0  | Clustered           | 18 VC_834_0  | 18  | 0.9116 | 1          | 0.9116 | 0 | 0 | 0 | 1      | Ref |
| MT114160 | Unassigned | Unassigned | Unassigned | 895_0  | Clustered           | 25 VC_895_0  | 25  | 0.5768 | 1          | 0.5768 | 0 | 0 | 0 | 1      | Ref |
| MT114161 | Unassigned | Unassigned | Unassigned | 1116_0 | Clustered           | 24 VC_1116_0 | 24  | 0.8376 | 1          | 0.8376 | 0 | 0 | 0 | 1      | Ref |
| MT114162 | Unassigned | Unassigned | Unassigned | 1115_3 | Clustered           | 6 VC_1115_3  | 6   | 0.1298 | 0.99999994 | 0.1298 | 0 | 0 | 0 | 0.8667 | Ref |



|          |            |            |            |        |                     |               |     |        |            |        |   |   |   |            |
|----------|------------|------------|------------|--------|---------------------|---------------|-----|--------|------------|--------|---|---|---|------------|
| MT114164 | Unassigned | Unassigned | Unassigned | 538_76 | Clustered           | 2 VC_538_76   | 2   | 0.0091 | 0.95761376 | 0.0087 | 0 | 0 | 0 | 1 Ref      |
| MT114165 | Unassigned | Unassigned | Unassigned | 571_2  | Clustered           | 17 VC_571_2   | 17  | 0.0965 | 1          | 0.0965 | 0 | 0 | 0 | 0.9779 Ref |
| MT114166 | Unassigned | Unassigned | Unassigned | 1212_0 | Clustered           | 21 VC_1212_0  | 21  | 0.711  | 1          | 0.711  | 0 | 0 | 0 | 1 Ref      |
| MT114167 | Unassigned | Unassigned | Unassigned | 538_28 | Clustered           | 2 VC_538_28   | 2   | 0.0135 | 0.95761531 | 0.0129 | 0 | 0 | 0 | 1 Ref      |
| MT118288 | Unassigned | Unassigned | Unassigned | 486_0  | Clustered           | 47 VC_486_0   | 47  | 0.9022 | 1          | 0.9022 | 0 | 0 | 0 | 1 Ref      |
| MT118289 | Unassigned | Unassigned | Unassigned | 80_4   | Clustered           | 3 VC_80_4     | 3   | 0.0106 | 0.99632092 | 0.0105 | 0 | 0 | 0 | 0.6667 Ref |
| MT118290 | Unassigned | Unassigned | Unassigned | 80_7   | Clustered           | 33 VC_80_7    | 33  | 0.2156 | 1          | 0.2156 | 0 | 0 | 0 | 0.8409 Ref |
| MT118291 | Unassigned | Unassigned | Unassigned | 80_0   | Clustered           | 64 VC_80_0    | 64  | 0.418  | 1          | 0.418  | 0 | 0 | 0 | 0.7649 Ref |
| MT118292 | Unassigned | Unassigned | Unassigned | 80_4   | Clustered           | 3 VC_80_4     | 3   | 0.0106 | 0.99632092 | 0.0105 | 0 | 0 | 0 | 0.6667 Ref |
| MT118293 | Unassigned | Unassigned | Unassigned | 81_0   | Clustered           | 41 VC_81_0    | 41  | 0.5815 | 1          | 0.5815 | 0 | 0 | 0 | 0.9805 Ref |
| MT118294 | Unassigned | Unassigned | Unassigned | 78_0   | Clustered           | 20 VC_78_0    | 20  | 0.9639 | 1          | 0.9639 | 0 | 0 | 0 | 1 Ref      |
| MT118295 | Unassigned | Unassigned | Unassigned | 78_0   | Clustered           | 20 VC_78_0    | 20  | 0.9639 | 1          | 0.9639 | 0 | 0 | 0 | 1 Ref      |
| MT118297 | Unassigned | Unassigned | Unassigned | 80_0   | Clustered           | 64 VC_80_0    | 64  | 0.418  | 1          | 0.418  | 0 | 0 | 0 | 0.7649 Ref |
| MT118298 | Unassigned | Unassigned | Unassigned | 80_0   | Clustered           | 64 VC_80_0    | 64  | 0.418  | 1          | 0.418  | 0 | 0 | 0 | 0.7649 Ref |
| MT118299 | Unassigned | Unassigned | Unassigned | 80_0   | Clustered           | 64 VC_80_0    | 64  | 0.418  | 1          | 0.418  | 0 | 0 | 0 | 0.7649 Ref |
| MT118300 | Unassigned | Unassigned | Unassigned | 78_0   | Clustered           | 20 VC_78_0    | 20  | 0.9639 | 1          | 0.9639 | 0 | 0 | 0 | 1 Ref      |
| MT118301 | Unassigned | Unassigned | Unassigned | 645_0  | Clustered           | 20 VC_645_0   | 20  | 0.8502 | 1          | 0.8502 | 0 | 0 | 0 | 1 Ref      |
| MT118302 | Unassigned | Unassigned | Unassigned | 172_0  | Clustered           | 26 VC_172_0   | 26  | 0.7909 | 1          | 0.7909 | 0 | 0 | 0 | 1 Ref      |
| MT118303 | Unassigned | Unassigned | Unassigned | 81_0   | Clustered           | 41 VC_81_0    | 41  | 0.5815 | 1          | 0.5815 | 0 | 0 | 0 | 0.9805 Ref |
| MT118304 | Unassigned | Unassigned | Unassigned | 766_0  | Clustered           | 40 VC_766_0   | 40  | 0.7511 | 1          | 0.7511 | 0 | 0 | 0 | 1 Ref      |
| MT118305 | Unassigned | Unassigned | Unassigned | 766_0  | Clustered           | 40 VC_766_0   | 40  | 0.7511 | 1          | 0.7511 | 0 | 0 | 0 | 1 Ref      |
| MT119359 | Unassigned | Unassigned | Unassigned | 711_0  | Clustered           | 48 VC_711_0   | 48  | 0.8217 | 1          | 0.8217 | 0 | 0 | 0 | 1 Ref      |
| MT119360 | Unassigned | Unassigned | Unassigned | 707_1  | Clustered           | 5 VC_707_1    | 5   | 0.4294 | 0.99999994 | 0.4294 | 0 | 0 | 0 | 1 Ref      |
| MT119361 | Unassigned | Unassigned | Unassigned | 707_1  | Clustered           | 5 VC_707_1    | 5   | 0.4294 | 0.99999994 | 0.4294 | 0 | 0 | 0 | 1 Ref      |
| MT119362 | Unassigned | Unassigned | Unassigned | 486_0  | Clustered           | 47 VC_486_0   | 47  | 0.9022 | 1          | 0.9022 | 0 | 0 | 0 | 1 Ref      |
| MT119363 | Unassigned | Unassigned | Unassigned | 80_0   | Clustered           | 64 VC_80_0    | 64  | 0.418  | 1          | 0.418  | 0 | 0 | 0 | 0.7649 Ref |
| MT119364 | Unassigned | Unassigned | Unassigned | 81_0   | Clustered           | 41 VC_81_0    | 41  | 0.5815 | 1          | 0.5815 | 0 | 0 | 0 | 0.9805 Ref |
| MT119365 | Unassigned | Unassigned | Unassigned | 80_0   | Clustered           | 64 VC_80_0    | 64  | 0.418  | 1          | 0.418  | 0 | 0 | 0 | 0.7649 Ref |
| MT119366 | Unassigned | Unassigned | Unassigned | 80_7   | Clustered           | 33 VC_80_7    | 33  | 0.2156 | 1          | 0.2156 | 0 | 0 | 0 | 0.8409 Ref |
| MT119367 | Unassigned | Unassigned | Unassigned | 81_0   | Clustered           | 41 VC_81_0    | 41  | 0.5815 | 1          | 0.5815 | 0 | 0 | 0 | 0.9805 Ref |
| MT119368 | Unassigned | Unassigned | Unassigned | 80_0   | Clustered           | 64 VC_80_0    | 64  | 0.418  | 1          | 0.418  | 0 | 0 | 0 | 0.7649 Ref |
| MT119369 | Unassigned | Unassigned | Unassigned | 80_7   | Clustered           | 33 VC_80_7    | 33  | 0.2156 | 1          | 0.2156 | 0 | 0 | 0 | 0.8409 Ref |
| MT119370 | Unassigned | Unassigned | Unassigned | 81_0   | Clustered           | 41 VC_81_0    | 41  | 0.5815 | 1          | 0.5815 | 0 | 0 | 0 | 0.9805 Ref |
| MT119371 | Unassigned | Unassigned | Unassigned | 486_0  | Clustered           | 47 VC_486_0   | 47  | 0.9022 | 1          | 0.9022 | 0 | 0 | 0 | 1 Ref      |
| MT119372 | Unassigned | Unassigned | Unassigned | 81_0   | Clustered           | 41 VC_81_0    | 41  | 0.5815 | 1          | 0.5815 | 0 | 0 | 0 | 0.9805 Ref |
| MT119373 | Unassigned | Unassigned | Unassigned | 486_0  | Clustered           | 47 VC_486_0   | 47  | 0.9022 | 1          | 0.9022 | 0 | 0 | 0 | 1 Ref      |
| MT119374 | Unassigned | Unassigned | Unassigned | 81_0   | Clustered           | 41 VC_81_0    | 41  | 0.5815 | 1          | 0.5815 | 0 | 0 | 0 | 0.9805 Ref |
| MT119375 | Unassigned | Unassigned | Unassigned | 81_0   | Clustered           | 41 VC_81_0    | 41  | 0.5815 | 1          | 0.5815 | 0 | 0 | 0 | 0.9805 Ref |
| MT119376 | Unassigned | Unassigned | Unassigned | 80_0   | Clustered           | 64 VC_80_0    | 64  | 0.418  | 1          | 0.418  | 0 | 0 | 0 | 0.7649 Ref |
| MT119377 | Unassigned | Unassigned | Unassigned | 81_0   | Clustered           | 41 VC_81_0    | 41  | 0.5815 | 1          | 0.5815 | 0 | 0 | 0 | 0.9805 Ref |
| MT119378 | Unassigned | Unassigned | Unassigned | 81_0   | Clustered           | 41 VC_81_0    | 41  | 0.5815 | 1          | 0.5815 | 0 | 0 | 0 | 0.9805 Ref |
| MT119766 | Unassigned | Unassigned | Unassigned | 968_0  | Clustered           | 2 VC_968_0    | 2   | 0.858  | 0.92499224 | 0.7937 | 0 | 0 | 0 | 1 Ref      |
| MT121964 | Unassigned | Unassigned | Unassigned | 1490_1 | Clustered           | 6 VC_1490_1   | 6   | 0.3734 | 1          | 0.3734 | 0 | 0 | 0 | 1 Ref      |
| MT121966 | Unassigned | Unassigned | Unassigned | 248_0  | Clustered           | 2 VC_248_0    | 2   | 0.0714 | 0.95429016 | 0.0681 | 0 | 0 | 0 | 1 Ref      |
| MT121967 | Unassigned | Unassigned | Unassigned | 367_0  | Clustered           | 2 VC_367_0    | 2   | 0.0508 | 0.93418388 | 0.0474 | 0 | 0 | 0 | 1 Ref      |
| MT127619 | Unassigned | Unassigned | Unassigned | 975_0  | Clustered           | 40 VC_975_0   | 40  | 0.6888 | 1          | 0.6888 | 0 | 0 | 0 | 1 Ref      |
| MT127620 | Unassigned | Unassigned | Unassigned | 837_1  | Clustered           | 24 VC_837_1   | 24  | 0.5328 | 1          | 0.5328 | 0 | 0 | 0 | 1 Ref      |
| MT129652 | Unassigned | Unassigned | Unassigned | 297_0  | Clustered           | 10 VC_297_0   | 10  | 0.0971 | 1          | 0.0971 | 0 | 0 | 0 | 1 Ref      |
| MT129653 | Unassigned | Unassigned | Unassigned | 837_1  | Clustered           | 24 VC_837_1   | 24  | 0.5328 | 1          | 0.5328 | 0 | 0 | 0 | 1 Ref      |
| MT129654 | Unassigned | Unassigned | Unassigned | 297_6  | Clustered           | 12 VC_297_6   | 12  | 0.1139 | 1          | 0.1139 | 0 | 0 | 0 | 0.8182 Ref |
| MT129655 | Unassigned | Unassigned | Unassigned | 837_1  | Clustered           | 24 VC_837_1   | 24  | 0.5328 | 1          | 0.5328 | 0 | 0 | 0 | 1 Ref      |
| MT133560 | Unassigned | Unassigned | Unassigned | 356_0  | Clustered           | 21 VC_356_0   | 21  | 0.5409 | 1          | 0.5409 | 0 | 0 | 0 | 1 Ref      |
| MT133561 | Unassigned | Unassigned | Unassigned | 80_0   | Clustered           | 64 VC_80_0    | 64  | 0.418  | 1          | 0.418  | 0 | 0 | 0 | 0.7649 Ref |
| MT133562 | Unassigned | Unassigned | Unassigned | 80_0   | Clustered           | 64 VC_80_0    | 64  | 0.418  | 1          | 0.418  | 0 | 0 | 0 | 0.7649 Ref |
| MT133563 | Unassigned | Unassigned | Unassigned | 81_0   | Clustered           | 41 VC_81_0    | 41  | 0.5815 | 1          | 0.5815 | 0 | 0 | 0 | 0.9805 Ref |
| MT135024 | Unassigned | Unassigned | Unassigned | 549_6  | Clustered/Singleton | 1 VC_549_6    | 1   | 0      | 1          | 0      | 0 | 0 | 0 | 1 Ref      |
| MT135025 | Unassigned | Unassigned | Unassigned | 549_5  | Clustered/Singleton | 1 VC_549_5    | 1   | 0      | 1          | 0      | 0 | 0 | 0 | 1 Ref      |
| MT135026 | Unassigned | Unassigned | Unassigned | 549_1  | Clustered           | 6 VC_549_1    | 6   | 0.1479 | 0.9998319  | 0.1478 | 0 | 0 | 0 | 1 Ref      |
| MT135176 | Unassigned | Unassigned | Unassigned | 249_1  | Clustered           | 21 VC_249_1   | 21  | 0.6775 | 1          | 0.6775 | 0 | 0 | 0 | 0.8476 Ref |
| MT135255 | Unassigned | Unassigned | Unassigned | 1190_0 | Clustered           | 5 VC_1190_0   | 5   | 0.4604 | 0.99999982 | 0.4604 | 0 | 0 | 0 | 1 Ref      |
| MT135256 | Unassigned | Unassigned | Unassigned | 1156_0 | Clustered           | 5 VC_1156_0   | 5   | 0.4454 | 0.99999977 | 0.4454 | 0 | 0 | 0 | 1 Ref      |
| MT135257 | Unassigned | Unassigned | Unassigned | 1145_0 | Clustered           | 164 VC_1145_0 | 164 | 0.8868 | 1          | 0.8868 | 0 | 0 | 0 | 1 Ref      |
| MT135258 | Unassigned | Unassigned | Unassigned | 1167_0 | Clustered           | 11 VC_1167_0  | 11  | 0.5637 | 1          | 0.5637 | 0 | 0 | 0 | 1 Ref      |
| MT135259 | Unassigned | Unassigned | Unassigned | 1169_0 | Clustered           | 8 VC_1169_0   | 8   | 0.2897 | 1          | 0.2897 | 0 | 0 | 0 | 1 Ref      |
| MT135261 | Unassigned | Unassigned | Unassigned | 1320_0 | Clustered           | 10 VC_1320_0  | 10  | 0.8478 | 1          | 0.8478 | 0 | 0 | 0 | 1 Ref      |
| MT135262 | Unassigned | Unassigned | Unassigned | 1491_0 | Clustered           | 4 VC_1491_0   | 4   | 1      | 1          | 1      | 0 | 0 | 0 | 1 Ref      |
| MT135263 | Unassigned | Unassigned | Unassigned | 1145_0 | Clustered           | 164 VC_1145_0 | 164 | 0.8868 | 1          | 0.8868 | 0 | 0 | 0 | 1 Ref      |
| MT135264 | Unassigned | Unassigned | Unassigned | 1145_0 | Clustered           | 164 VC_1145_0 | 164 | 0.8868 | 1          | 0.8868 | 0 | 0 | 0 | 1 Ref      |
| MT135265 | Unassigned | Unassigned | Unassigned | 1164_0 | Clustered           | 5 VC_1164_0   | 5   | 0.831  | 0.99879053 | 0.83   | 0 | 0 | 0 | 1 Ref      |
| MT135266 | Unassigned | Unassigned | Unassigned | 1156_0 | Clustered           | 5 VC_1156_0   | 5   | 0.4454 | 0.99999977 | 0.4454 | 0 | 0 | 0 | 1 Ref      |
| MT135267 | Unassigned | Unassigned | Unassigned | 1189_0 | Clustered           | 16 VC_1189_0  | 16  | 0.8814 | 1          | 0.8814 | 0 | 0 | 0 | 1 Ref      |
| MT135268 | Unassigned | Unassigned | Unassigned | 1167_0 | Clustered           | 11 VC_1167_0  | 11  | 0.5637 | 1          | 0.5637 | 0 | 0 | 0 | 1 Ref      |
| MT135269 | Unassigned | Unassigned | Unassigned | 1404_0 | Clustered           | 2 VC_1404_0   | 2   | 0.7721 | 0.5        | 0.3861 | 0 | 0 | 0 | 1 Ref      |
| MT135271 | Unassigned | Unassigned | Unassigned | 1189_0 | Clustered           | 16 VC_1189_0  | 16  | 0.8814 | 1          | 0.8814 | 0 | 0 | 0 | 1 Ref      |
| MT135272 | Unassigned | Unassigned | Unassigned | 1145_0 | Clustered           | 164 VC_1145_0 | 164 | 0.8868 | 1          | 0.8868 | 0 | 0 | 0 | 1 Ref      |
| MT135273 | Unassigned | Unassigned | Unassigned | 1145_0 | Clustered           | 164 VC_1145_0 | 164 | 0.8868 | 1          | 0.8868 | 0 | 0 | 0 | 1 Ref      |
| MT135274 | Unassigned | Unassigned | Unassigned | 1491_0 | Clustered           | 4 VC_1491_0   | 4   | 1      | 1          | 1      | 0 | 0 | 0 | 1 Ref      |
| MT135275 | Unassigned | Unassigned | Unassigned | 1190_0 | Clustered           | 5 VC_1190_0   | 5   | 0.4604 | 0.99999982 | 0.4604 | 0 | 0 | 0 | 1 Ref      |
| MT135276 | Unassigned | Unassigned | Unassigned | 1344_0 | Clustered           | 26 VC_1344_0  | 26  | 0.5437 | 1          | 0.5437 | 0 | 0 | 0 | 1 Ref      |
| MT135277 | Unassigned | Unassigned | Unassigned | 1170_0 | Clustered           | 19 VC_1170_0  | 19  | 0.7497 | 1          | 0.7497 | 0 | 0 | 0 | 1 Ref      |
| MT135278 | Unassigned | Unassigned | Unassigned | 1145_0 | Clustered           | 164 VC_1145_0 | 164 | 0.8868 | 1          | 0.8868 | 0 | 0 | 0 | 1 Ref      |



|          |            |            |            |        |           |               |     |        |             |        |   |   |   |       |
|----------|------------|------------|------------|--------|-----------|---------------|-----|--------|-------------|--------|---|---|---|-------|
| MT135281 | Unassigned | Unassigned | Unassigned | 1189.0 | Clustered | 16 VC_1189_0  | 16  | 0.8814 | 1           | 0.8814 | 0 | 0 | 0 | 1 Ref |
| MT135282 | Unassigned | Unassigned | Unassigned | 1150.0 | Clustered | 2 VC_1150_0   | 2   | 0.2628 | 0.98847992  | 0.2361 | 0 | 0 | 0 | 1 Ref |
| MT135285 | Unassigned | Unassigned | Unassigned | 1492.0 | Clustered | 8 VC_1492_0   | 8   | 0.8295 | 0.999999998 | 0.8295 | 0 | 0 | 0 | 1 Ref |
| MT135287 | Unassigned | Unassigned | Unassigned | 1494.0 | Clustered | 7 VC_1494_0   | 7   | 0.6947 | 0.999999999 | 0.6947 | 0 | 0 | 0 | 1 Ref |
| MT135288 | Unassigned | Unassigned | Unassigned | 1493.0 | Clustered | 8 VC_1493_0   | 8   | 0.7769 | 1           | 0.7769 | 0 | 0 | 0 | 1 Ref |
| MT135289 | Unassigned | Unassigned | Unassigned | 1492.0 | Clustered | 8 VC_1492_0   | 8   | 0.8295 | 0.999999998 | 0.8295 | 0 | 0 | 0 | 1 Ref |
| MT135290 | Unassigned | Unassigned | Unassigned | 1493.0 | Clustered | 8 VC_1493_0   | 8   | 0.7769 | 1           | 0.7769 | 0 | 0 | 0 | 1 Ref |
| MT135291 | Unassigned | Unassigned | Unassigned | 1493.0 | Clustered | 8 VC_1493_0   | 8   | 0.7769 | 1           | 0.7769 | 0 | 0 | 0 | 1 Ref |
| MT135292 | Unassigned | Unassigned | Unassigned | 1495.0 | Clustered | 6 VC_1495_0   | 6   | 0.9829 | 0.98467288  | 0.9678 | 0 | 0 | 0 | 1 Ref |
| MT135293 | Unassigned | Unassigned | Unassigned | 1495.0 | Clustered | 6 VC_1495_0   | 6   | 0.9829 | 0.98467288  | 0.9678 | 0 | 0 | 0 | 1 Ref |
| MT135294 | Unassigned | Unassigned | Unassigned | 1494.0 | Clustered | 7 VC_1494_0   | 7   | 0.6947 | 0.999999999 | 0.6947 | 0 | 0 | 0 | 1 Ref |
| MT135296 | Unassigned | Unassigned | Unassigned | 1495.0 | Clustered | 6 VC_1495_0   | 6   | 0.9829 | 0.98467288  | 0.9678 | 0 | 0 | 0 | 1 Ref |
| MT135297 | Unassigned | Unassigned | Unassigned | 1492.0 | Clustered | 8 VC_1492_0   | 8   | 0.8295 | 0.999999998 | 0.8295 | 0 | 0 | 0 | 1 Ref |
| MT135298 | Unassigned | Unassigned | Unassigned | 1494.0 | Clustered | 7 VC_1494_0   | 7   | 0.6947 | 0.999999999 | 0.6947 | 0 | 0 | 0 | 1 Ref |
| MT135299 | Unassigned | Unassigned | Unassigned | 1494.0 | Clustered | 7 VC_1494_0   | 7   | 0.6947 | 0.999999999 | 0.6947 | 0 | 0 | 0 | 1 Ref |
| MT135301 | Unassigned | Unassigned | Unassigned | 1493.0 | Clustered | 8 VC_1493_0   | 8   | 0.7769 | 1           | 0.7769 | 0 | 0 | 0 | 1 Ref |
| MT135302 | Unassigned | Unassigned | Unassigned | 1492.0 | Clustered | 8 VC_1492_0   | 8   | 0.8295 | 0.999999998 | 0.8295 | 0 | 0 | 0 | 1 Ref |
| MT135303 | Unassigned | Unassigned | Unassigned | 1493.0 | Clustered | 8 VC_1493_0   | 8   | 0.7769 | 1           | 0.7769 | 0 | 0 | 0 | 1 Ref |
| MT135304 | Unassigned | Unassigned | Unassigned | 1494.0 | Clustered | 7 VC_1494_0   | 7   | 0.6947 | 0.999999999 | 0.6947 | 0 | 0 | 0 | 1 Ref |
| MT135305 | Unassigned | Unassigned | Unassigned | 1495.0 | Clustered | 6 VC_1495_0   | 6   | 0.9829 | 0.98467288  | 0.9678 | 0 | 0 | 0 | 1 Ref |
| MT135306 | Unassigned | Unassigned | Unassigned | 1494.0 | Clustered | 7 VC_1494_0   | 7   | 0.6947 | 0.999999999 | 0.6947 | 0 | 0 | 0 | 1 Ref |
| MT135307 | Unassigned | Unassigned | Unassigned | 1493.0 | Clustered | 8 VC_1493_0   | 8   | 0.7769 | 1           | 0.7769 | 0 | 0 | 0 | 1 Ref |
| MT135308 | Unassigned | Unassigned | Unassigned | 1492.0 | Clustered | 8 VC_1492_0   | 8   | 0.8295 | 0.999999998 | 0.8295 | 0 | 0 | 0 | 1 Ref |
| MT135309 | Unassigned | Unassigned | Unassigned | 1493.0 | Clustered | 8 VC_1493_0   | 8   | 0.7769 | 1           | 0.7769 | 0 | 0 | 0 | 1 Ref |
| MT135310 | Unassigned | Unassigned | Unassigned | 1494.0 | Clustered | 7 VC_1494_0   | 7   | 0.6947 | 0.999999999 | 0.6947 | 0 | 0 | 0 | 1 Ref |
| MT135311 | Unassigned | Unassigned | Unassigned | 1493.0 | Clustered | 8 VC_1493_0   | 8   | 0.7769 | 1           | 0.7769 | 0 | 0 | 0 | 1 Ref |
| MT135314 | Unassigned | Unassigned | Unassigned | 1492.0 | Clustered | 8 VC_1492_0   | 8   | 0.8295 | 0.999999998 | 0.8295 | 0 | 0 | 0 | 1 Ref |
| MT135326 | Unassigned | Unassigned | Unassigned | 1369.0 | Clustered | 10 VC_1369_0  | 10  | 0.6223 | 0.95845085  | 0.5964 | 0 | 0 | 0 | 1 Ref |
| MT135328 | Unassigned | Unassigned | Unassigned | 1372.0 | Clustered | 2 VC_1372_0   | 2   | 0.3093 | 0.72985431  | 0.2257 | 0 | 0 | 0 | 1 Ref |
| MT135329 | Unassigned | Unassigned | Unassigned | 1316.0 | Clustered | 8 VC_1316_0   | 8   | 0.821  | 1           | 0.821  | 0 | 0 | 0 | 1 Ref |
| MT135330 | Unassigned | Unassigned | Unassigned | 1346.0 | Clustered | 25 VC_1346_0  | 25  | 1      | 1           | 1      | 0 | 0 | 0 | 1 Ref |
| MT135332 | Unassigned | Unassigned | Unassigned | 1496.0 | Clustered | 2 VC_1496_0   | 2   | 1      | 1           | 1      | 0 | 0 | 0 | 1 Ref |
| MT135333 | Unassigned | Unassigned | Unassigned | 1335.0 | Clustered | 13 VC_1335_0  | 13  | 0.7519 | 1           | 0.7519 | 0 | 0 | 0 | 1 Ref |
| MT135334 | Unassigned | Unassigned | Unassigned | 1320.0 | Clustered | 10 VC_1320_0  | 10  | 0.8478 | 1           | 0.8478 | 0 | 0 | 0 | 1 Ref |
| MT135335 | Unassigned | Unassigned | Unassigned | 1403.0 | Clustered | 5 VC_1403_0   | 5   | 1      | 1           | 1      | 0 | 0 | 0 | 1 Ref |
| MT135336 | Unassigned | Unassigned | Unassigned | 1308.0 | Clustered | 15 VC_1308_0  | 15  | 0.9074 | 1           | 0.9074 | 0 | 0 | 0 | 1 Ref |
| MT135337 | Unassigned | Unassigned | Unassigned | 1185.0 | Clustered | 7 VC_1185_0   | 7   | 0.6862 | 1           | 0.6862 | 0 | 0 | 0 | 1 Ref |
| MT135338 | Unassigned | Unassigned | Unassigned | 1145.0 | Clustered | 164 VC_1145_0 | 164 | 0.8868 | 1           | 0.8868 | 0 | 0 | 0 | 1 Ref |
| MT135339 | Unassigned | Unassigned | Unassigned | 1286.0 | Clustered | 16 VC_1286_0  | 16  | 0.9448 | 1           | 0.9448 | 0 | 0 | 0 | 1 Ref |
| MT135340 | Unassigned | Unassigned | Unassigned | 1403.0 | Clustered | 5 VC_1403_0   | 5   | 1      | 1           | 1      | 0 | 0 | 0 | 1 Ref |
| MT135343 | Unassigned | Unassigned | Unassigned | 1374.0 | Clustered | 3 VC_1374_0   | 3   | 1      | 1           | 1      | 0 | 0 | 0 | 1 Ref |
| MT135344 | Unassigned | Unassigned | Unassigned | 690.0  | Clustered | 12 VC_690_0   | 12  | 1      | 1           | 1      | 0 | 0 | 0 | 1 Ref |
| MT135345 | Unassigned | Unassigned | Unassigned | 1326.0 | Clustered | 3 VC_1326_0   | 3   | 0.0804 | 0.6862532   | 0.0552 | 0 | 0 | 0 | 1 Ref |
| MT135346 | Unassigned | Unassigned | Unassigned | 1497.0 | Clustered | 2 VC_1497_0   | 2   | 1      | 1           | 1      | 0 | 0 | 0 | 1 Ref |
| MT135347 | Unassigned | Unassigned | Unassigned | 1299.0 | Clustered | 53 VC_1299_0  | 53  | 0.8666 | 1           | 0.8666 | 0 | 0 | 0 | 1 Ref |
| MT135348 | Unassigned | Unassigned | Unassigned | 1286.0 | Clustered | 16 VC_1286_0  | 16  | 0.9448 | 1           | 0.9448 | 0 | 0 | 0 | 1 Ref |
| MT135349 | Unassigned | Unassigned | Unassigned | 1378.0 | Clustered | 4 VC_1378_0   | 4   | 0.7996 | 0.98875328  | 0.7906 | 0 | 0 | 0 | 1 Ref |
| MT135350 | Unassigned | Unassigned | Unassigned | 1394.0 | Clustered | 4 VC_1394_0   | 4   | 0.7326 | 0.99899459  | 0.7318 | 0 | 0 | 0 | 1 Ref |
| MT135351 | Unassigned | Unassigned | Unassigned | 1165.0 | Clustered | 10 VC_1165_0  | 10  | 0.9263 | 1           | 0.9263 | 0 | 0 | 0 | 1 Ref |
| MT135352 | Unassigned | Unassigned | Unassigned | 1299.0 | Clustered | 53 VC_1299_0  | 53  | 0.8666 | 1           | 0.8666 | 0 | 0 | 0 | 1 Ref |
| MT135353 | Unassigned | Unassigned | Unassigned | 1367.0 | Clustered | 5 VC_1367_0   | 5   | 0.7699 | 0.66985041  | 0.5157 | 0 | 0 | 0 | 1 Ref |
| MT135354 | Unassigned | Unassigned | Unassigned | 1317.0 | Clustered | 2 VC_1317_0   | 2   | 1      | 1           | 1      | 0 | 0 | 0 | 1 Ref |
| MT135355 | Unassigned | Unassigned | Unassigned | 1299.0 | Clustered | 53 VC_1299_0  | 53  | 0.8666 | 1           | 0.8666 | 0 | 0 | 0 | 1 Ref |
| MT135357 | Unassigned | Unassigned | Unassigned | 1329.0 | Clustered | 2 VC_1329_0   | 2   | 1      | 1           | 1      | 0 | 0 | 0 | 1 Ref |
| MT135358 | Unassigned | Unassigned | Unassigned | 1331.0 | Clustered | 6 VC_1331_0   | 6   | 0.7375 | 0.9999804   | 0.7375 | 0 | 0 | 0 | 1 Ref |
| MT135359 | Unassigned | Unassigned | Unassigned | 1498.0 | Clustered | 8 VC_1498_0   | 8   | 0.9713 | 0.94517081  | 0.918  | 0 | 0 | 0 | 1 Ref |
| MT135361 | Unassigned | Unassigned | Unassigned | 1286.0 | Clustered | 16 VC_1286_0  | 16  | 0.9448 | 1           | 0.9448 | 0 | 0 | 0 | 1 Ref |
| MT135363 | Unassigned | Unassigned | Unassigned | 1378.0 | Clustered | 4 VC_1378_0   | 4   | 0.7996 | 0.98875328  | 0.7906 | 0 | 0 | 0 | 1 Ref |
| MT135365 | Unassigned | Unassigned | Unassigned | 1347.0 | Clustered | 3 VC_1347_0   | 3   | 0.655  | 0.86585706  | 0.5671 | 0 | 0 | 0 | 1 Ref |
| MT135366 | Unassigned | Unassigned | Unassigned | 1299.0 | Clustered | 53 VC_1299_0  | 53  | 0.8666 | 1           | 0.8666 | 0 | 0 | 0 | 1 Ref |
| MT135367 | Unassigned | Unassigned | Unassigned | 1310.0 | Clustered | 6 VC_1310_0   | 6   | 0.6075 | 1           | 0.6075 | 0 | 0 | 0 | 1 Ref |
| MT135368 | Unassigned | Unassigned | Unassigned | 1498.0 | Clustered | 8 VC_1498_0   | 8   | 0.9713 | 0.94517081  | 0.918  | 0 | 0 | 0 | 1 Ref |
| MT135369 | Unassigned | Unassigned | Unassigned | 1499.0 | Clustered | 4 VC_1499_0   | 4   | 1      | 1           | 1      | 0 | 0 | 0 | 1 Ref |
| MT135370 | Unassigned | Unassigned | Unassigned | 1398.0 | Clustered | 7 VC_1398_0   | 7   | 0.8336 | 0.99999844  | 0.8336 | 0 | 0 | 0 | 1 Ref |
| MT135371 | Unassigned | Unassigned | Unassigned | 1236.0 | Clustered | 3 VC_1236_0   | 3   | 0.4055 | 0.99427327  | 0.4032 | 0 | 0 | 0 | 1 Ref |
| MT135372 | Unassigned | Unassigned | Unassigned | 1386.0 | Clustered | 2 VC_1386_0   | 2   | 1      | 1           | 1      | 0 | 0 | 0 | 1 Ref |
| MT135373 | Unassigned | Unassigned | Unassigned | 1398.0 | Clustered | 7 VC_1398_0   | 7   | 0.8336 | 0.99999844  | 0.8336 | 0 | 0 | 0 | 1 Ref |
| MT135374 | Unassigned | Unassigned | Unassigned | 1498.0 | Clustered | 8 VC_1498_0   | 8   | 0.9713 | 0.94517081  | 0.918  | 0 | 0 | 0 | 1 Ref |
| MT135375 | Unassigned | Unassigned | Unassigned | 1500.0 | Clustered | 3 VC_1500_0   | 3   | 1      | 1           | 1      | 0 | 0 | 0 | 1 Ref |
| MT135376 | Unassigned | Unassigned | Unassigned | 1403.0 | Clustered | 5 VC_1403_0   | 5   | 1      | 1           | 1      | 0 | 0 | 0 | 1 Ref |
| MT135377 | Unassigned | Unassigned | Unassigned | 1331.0 | Clustered | 6 VC_1331_0   | 6   | 0.7375 | 0.9999804   | 0.7375 | 0 | 0 | 0 | 1 Ref |
| MT135378 | Unassigned | Unassigned | Unassigned | 1498.0 | Clustered | 8 VC_1498_0   | 8   | 0.9713 | 0.94517081  | 0.918  | 0 | 0 | 0 | 1 Ref |
| MT135379 | Unassigned | Unassigned | Unassigned | 1335.0 | Clustered | 13 VC_1335_0  | 13  | 0.7519 | 1           | 0.7519 | 0 | 0 | 0 | 1 Ref |
| MT135380 | Unassigned | Unassigned | Unassigned | 1328.0 | Clustered | 3 VC_1328_0   | 3   | 0.6791 | 0.98688028  | 0.6702 | 0 | 0 | 0 | 1 Ref |
| MT135381 | Unassigned | Unassigned | Unassigned | 1299.0 | Clustered | 53 VC_1299_0  | 53  | 0.8666 | 1           | 0.8666 | 0 | 0 | 0 | 1 Ref |
| MT135382 | Unassigned | Unassigned | Unassigned | 1299.0 | Clustered | 53 VC_1299_0  | 53  | 0.8666 | 1           | 0.8666 | 0 | 0 | 0 | 1 Ref |
| MT135383 | Unassigned | Unassigned | Unassigned | 1306.0 | Clustered | 4 VC_1306_0   | 4   | 0.8184 | 0.99530591  | 0.8146 | 0 | 0 | 0 | 1 Ref |
| MT135384 | Unassigned | Unassigned | Unassigned | 1286.0 | Clustered | 16 VC_1286_0  | 16  | 0.9448 | 1           | 0.9448 | 0 | 0 | 0 | 1 Ref |
| MT135385 | Unassigned | Unassigned | Unassigned | 1349.0 | Clustered | 3 VC_1349_0   | 3   | 1      | 1           | 1      | 0 | 0 | 0 | 1 Ref |
| MT135387 | Unassigned | Unassigned | Unassigned | 1299.0 | Clustered | 53 VC_1299_0  | 53  | 0.8666 | 1           | 0.8666 | 0 | 0 | 0 | 1 Ref |
| MT135388 | Unassigned | Unassigned | Unassigned | 1330.0 | Clustered | 5 VC_1330_0   | 5   | 1      | 1           | 1      | 0 | 0 | 0 | 1 Ref |



|          |            |            |            |        |                     |              |    |        |            |        |   |   |   |            |
|----------|------------|------------|------------|--------|---------------------|--------------|----|--------|------------|--------|---|---|---|------------|
| MT135389 | Unassigned | Unassigned | Unassigned | 1491_0 | Clustered           | 4 VC_1491_0  | 4  | 1      | 1          | 1      | 0 | 0 | 0 | 1 Ref      |
| MT135391 | Unassigned | Unassigned | Unassigned | 1335_0 | Clustered           | 13 VC_1335_0 | 13 | 0.7519 | 1          | 0.7519 | 0 | 0 | 0 | 1 Ref      |
| MT135392 | Unassigned | Unassigned | Unassigned | 1378_0 | Clustered           | 4 VC_1378_0  | 4  | 0.7996 | 0.98875328 | 0.7906 | 0 | 0 | 0 | 1 Ref      |
| MT135393 | Unassigned | Unassigned | Unassigned | 1403_0 | Clustered           | 5 VC_1403_0  | 5  | 1      | 1          | 1      | 0 | 0 | 0 | 1 Ref      |
| MT135394 | Unassigned | Unassigned | Unassigned | 1303_0 | Clustered           | 2 VC_1303_0  | 2  | 1      | 1          | 1      | 0 | 0 | 0 | 1 Ref      |
| MT135395 | Unassigned | Unassigned | Unassigned | 1497_0 | Clustered           | 2 VC_1497_0  | 2  | 1      | 1          | 1      | 0 | 0 | 0 | 1 Ref      |
| MT135396 | Unassigned | Unassigned | Unassigned | 1499_0 | Clustered           | 4 VC_1499_0  | 4  | 1      | 1          | 1      | 0 | 0 | 0 | 1 Ref      |
| MT135397 | Unassigned | Unassigned | Unassigned | 1501_0 | Clustered           | 2 VC_1501_0  | 2  | 1      | 1          | 1      | 0 | 0 | 0 | 1 Ref      |
| MT135399 | Unassigned | Unassigned | Unassigned | 1498_0 | Clustered           | 8 VC_1498_0  | 8  | 0.9713 | 0.94517081 | 0.918  | 0 | 0 | 0 | 1 Ref      |
| MT135400 | Unassigned | Unassigned | Unassigned | 1367_0 | Clustered           | 5 VC_1367_0  | 5  | 0.7699 | 0.66985041 | 0.5157 | 0 | 0 | 0 | 1 Ref      |
| MT135401 | Unassigned | Unassigned | Unassigned | 1335_0 | Clustered           | 13 VC_1335_0 | 13 | 0.7519 | 1          | 0.7519 | 0 | 0 | 0 | 1 Ref      |
| MT135402 | Unassigned | Unassigned | Unassigned | 1367_0 | Clustered           | 5 VC_1367_0  | 5  | 0.7699 | 0.66985041 | 0.5157 | 0 | 0 | 0 | 1 Ref      |
| MT135403 | Unassigned | Unassigned | Unassigned | 1306_0 | Clustered           | 4 VC_1306_0  | 4  | 0.8184 | 0.99530591 | 0.8146 | 0 | 0 | 0 | 1 Ref      |
| MT135404 | Unassigned | Unassigned | Unassigned | 690_0  | Clustered           | 12 VC_690_0  | 12 | 1      | 1          | 1      | 0 | 0 | 0 | 1 Ref      |
| MT135405 | Unassigned | Unassigned | Unassigned | 1112_0 | Clustered           | 4 VC_1112_0  | 4  | 1      | 1          | 1      | 0 | 0 | 0 | 1 Ref      |
| MT135406 | Unassigned | Unassigned | Unassigned | 1346_0 | Clustered           | 25 VC_1346_0 | 25 | 1      | 1          | 1      | 0 | 0 | 0 | 1 Ref      |
| MT135407 | Unassigned | Unassigned | Unassigned | 1501_0 | Clustered           | 2 VC_1501_0  | 2  | 1      | 1          | 1      | 0 | 0 | 0 | 1 Ref      |
| MT135408 | Unassigned | Unassigned | Unassigned | 1378_0 | Clustered           | 4 VC_1378_0  | 4  | 0.7996 | 0.98875328 | 0.7906 | 0 | 0 | 0 | 1 Ref      |
| MT135409 | Unassigned | Unassigned | Unassigned | 1286_0 | Clustered           | 16 VC_1286_0 | 16 | 0.9448 | 1          | 0.9448 | 0 | 0 | 0 | 1 Ref      |
| MT135410 | Unassigned | Unassigned | Unassigned | 1350_0 | Clustered           | 2 VC_1350_0  | 2  | 1      | 1          | 1      | 0 | 0 | 0 | 1 Ref      |
| MT135411 | Unassigned | Unassigned | Unassigned | 1363_0 | Clustered           | 3 VC_1363_0  | 3  | 1      | 1          | 1      | 0 | 0 | 0 | 1 Ref      |
| MT135412 | Unassigned | Unassigned | Unassigned | 690_0  | Clustered           | 12 VC_690_0  | 12 | 1      | 1          | 1      | 0 | 0 | 0 | 1 Ref      |
| MT135413 | Unassigned | Unassigned | Unassigned | 1491_0 | Clustered           | 4 VC_1491_0  | 4  | 1      | 1          | 1      | 0 | 0 | 0 | 1 Ref      |
| MT135414 | Unassigned | Unassigned | Unassigned | 1498_0 | Clustered           | 8 VC_1498_0  | 8  | 0.9713 | 0.94517081 | 0.918  | 0 | 0 | 0 | 1 Ref      |
| MT135415 | Unassigned | Unassigned | Unassigned | 1337_0 | Clustered           | 3 VC_1337_0  | 3  | 0.394  | 0.99705286 | 0.3928 | 0 | 0 | 0 | 1 Ref      |
| MT135416 | Unassigned | Unassigned | Unassigned | 1374_0 | Clustered           | 3 VC_1374_0  | 3  | 1      | 1          | 1      | 0 | 0 | 0 | 1 Ref      |
| MT135418 | Unassigned | Unassigned | Unassigned | 1398_0 | Clustered           | 7 VC_1398_0  | 7  | 0.8336 | 0.99999844 | 0.8336 | 0 | 0 | 0 | 1 Ref      |
| MT135419 | Unassigned | Unassigned | Unassigned | 1498_0 | Clustered           | 8 VC_1498_0  | 8  | 0.9713 | 0.94517081 | 0.918  | 0 | 0 | 0 | 1 Ref      |
| MT135420 | Unassigned | Unassigned | Unassigned | 1368_0 | Clustered           | 2 VC_1368_0  | 2  | 1      | 1          | 1      | 0 | 0 | 0 | 1 Ref      |
| MT135421 | Unassigned | Unassigned | Unassigned | 1400_0 | Clustered           | 2 VC_1400_0  | 2  | 1      | 1          | 1      | 0 | 0 | 0 | 1 Ref      |
| MT135422 | Unassigned | Unassigned | Unassigned | 1236_0 | Clustered           | 3 VC_1236_0  | 3  | 0.4055 | 0.99427327 | 0.4032 | 0 | 0 | 0 | 1 Ref      |
| MT135423 | Unassigned | Unassigned | Unassigned | 1328_0 | Clustered           | 3 VC_1328_0  | 3  | 0.6791 | 0.98688028 | 0.6702 | 0 | 0 | 0 | 1 Ref      |
| MT135424 | Unassigned | Unassigned | Unassigned | 1185_0 | Clustered           | 7 VC_1185_0  | 7  | 0.6862 | 1          | 0.6862 | 0 | 0 | 0 | 1 Ref      |
| MT135425 | Unassigned | Unassigned | Unassigned | 1344_0 | Clustered           | 26 VC_1344_0 | 26 | 0.5437 | 1          | 0.5437 | 0 | 0 | 0 | 1 Ref      |
| MT135426 | Unassigned | Unassigned | Unassigned | 1331_0 | Clustered           | 6 VC_1331_0  | 6  | 0.7375 | 0.9999804  | 0.7375 | 0 | 0 | 0 | 1 Ref      |
| MT135427 | Unassigned | Unassigned | Unassigned | 1331_0 | Clustered           | 6 VC_1331_0  | 6  | 0.7375 | 0.9999804  | 0.7375 | 0 | 0 | 0 | 1 Ref      |
| MT135429 | Unassigned | Unassigned | Unassigned | 1404_0 | Clustered           | 2 VC_1404_0  | 2  | 0.7721 | 0.5        | 0.3861 | 0 | 0 | 0 | 1 Ref      |
| MT135430 | Unassigned | Unassigned | Unassigned | 1398_0 | Clustered           | 7 VC_1398_0  | 7  | 0.8336 | 0.99999844 | 0.8336 | 0 | 0 | 0 | 1 Ref      |
| MT135431 | Unassigned | Unassigned | Unassigned | 1346_0 | Clustered           | 25 VC_1346_0 | 25 | 1      | 1          | 1      | 0 | 0 | 0 | 1 Ref      |
| MT135432 | Unassigned | Unassigned | Unassigned | 1236_0 | Clustered           | 3 VC_1236_0  | 3  | 0.4055 | 0.99427327 | 0.4032 | 0 | 0 | 0 | 1 Ref      |
| MT135433 | Unassigned | Unassigned | Unassigned | 1310_0 | Clustered           | 6 VC_1310_0  | 6  | 0.6075 | 1          | 0.6075 | 0 | 0 | 0 | 1 Ref      |
| MT135434 | Unassigned | Unassigned | Unassigned | 1338_0 | Clustered           | 4 VC_1338_0  | 4  | 0.6053 | 0.76972092 | 0.4659 | 0 | 0 | 0 | 1 Ref      |
| MT135435 | Unassigned | Unassigned | Unassigned | 1286_0 | Clustered           | 16 VC_1286_0 | 16 | 0.9448 | 1          | 0.9448 | 0 | 0 | 0 | 1 Ref      |
| MT135436 | Unassigned | Unassigned | Unassigned | 1496_0 | Clustered           | 2 VC_1496_0  | 2  | 1      | 1          | 1      | 0 | 0 | 0 | 1 Ref      |
| MT135437 | Unassigned | Unassigned | Unassigned | 1335_0 | Clustered           | 13 VC_1335_0 | 13 | 0.7519 | 1          | 0.7519 | 0 | 0 | 0 | 1 Ref      |
| MT135438 | Unassigned | Unassigned | Unassigned | 1500_0 | Clustered           | 3 VC_1500_0  | 3  | 1      | 1          | 1      | 0 | 0 | 0 | 1 Ref      |
| MT135439 | Unassigned | Unassigned | Unassigned | 1309_0 | Clustered           | 3 VC_1309_0  | 3  | 0.3217 | 0.99790393 | 0.321  | 0 | 0 | 0 | 1 Ref      |
| MT135440 | Unassigned | Unassigned | Unassigned | 1238_0 | Clustered           | 5 VC_1238_0  | 5  | 0.5217 | 0.99999899 | 0.5217 | 0 | 0 | 0 | 1 Ref      |
| MT135441 | Unassigned | Unassigned | Unassigned | 1308_0 | Clustered           | 15 VC_1308_0 | 15 | 0.9074 | 1          | 0.9074 | 0 | 0 | 0 | 1 Ref      |
| MT135443 | Unassigned | Unassigned | Unassigned | 1330_0 | Clustered           | 5 VC_1330_0  | 5  | 1      | 1          | 1      | 0 | 0 | 0 | 1 Ref      |
| MT135444 | Unassigned | Unassigned | Unassigned | 1299_0 | Clustered           | 53 VC_1299_0 | 53 | 0.8666 | 1          | 0.8666 | 0 | 0 | 0 | 1 Ref      |
| MT135445 | Unassigned | Unassigned | Unassigned | 1335_0 | Clustered           | 13 VC_1335_0 | 13 | 0.7519 | 1          | 0.7519 | 0 | 0 | 0 | 1 Ref      |
| MT135446 | Unassigned | Unassigned | Unassigned | 1238_0 | Clustered           | 5 VC_1238_0  | 5  | 0.5217 | 0.99999899 | 0.5217 | 0 | 0 | 0 | 1 Ref      |
| MT135447 | Unassigned | Unassigned | Unassigned | 1353_0 | Clustered           | 4 VC_1353_0  | 4  | 0.7838 | 0.99289298 | 0.7782 | 0 | 0 | 0 | 1 Ref      |
| MT135448 | Unassigned | Unassigned | Unassigned | 1347_0 | Clustered           | 3 VC_1347_0  | 3  | 0.655  | 0.86585706 | 0.5671 | 0 | 0 | 0 | 1 Ref      |
| MT135451 | Unassigned | Unassigned | Unassigned | 1338_0 | Clustered           | 4 VC_1338_0  | 4  | 0.6053 | 0.76972092 | 0.4659 | 0 | 0 | 0 | 1 Ref      |
| MT135453 | Unassigned | Unassigned | Unassigned | 1500_0 | Clustered           | 3 VC_1500_0  | 3  | 1      | 1          | 1      | 0 | 0 | 0 | 1 Ref      |
| MT135454 | Unassigned | Unassigned | Unassigned | 1499_0 | Clustered           | 4 VC_1499_0  | 4  | 1      | 1          | 1      | 0 | 0 | 0 | 1 Ref      |
| MT135455 | Unassigned | Unassigned | Unassigned | 1398_0 | Clustered           | 7 VC_1398_0  | 7  | 0.8336 | 0.99999844 | 0.8336 | 0 | 0 | 0 | 1 Ref      |
| MT135456 | Unassigned | Unassigned | Unassigned | 1306_0 | Clustered           | 4 VC_1306_0  | 4  | 0.8184 | 0.99530591 | 0.8146 | 0 | 0 | 0 | 1 Ref      |
| MT135457 | Unassigned | Unassigned | Unassigned | 1394_0 | Clustered           | 4 VC_1394_0  | 4  | 0.7326 | 0.99899459 | 0.7318 | 0 | 0 | 0 | 1 Ref      |
| MT135458 | Unassigned | Unassigned | Unassigned | 1346_0 | Clustered           | 25 VC_1346_0 | 25 | 1      | 1          | 1      | 0 | 0 | 0 | 1 Ref      |
| MT135459 | Unassigned | Unassigned | Unassigned | 1398_0 | Clustered           | 7 VC_1398_0  | 7  | 0.8336 | 0.99999844 | 0.8336 | 0 | 0 | 0 | 1 Ref      |
| MT135460 | Unassigned | Unassigned | Unassigned | 1499_0 | Clustered           | 4 VC_1499_0  | 4  | 1      | 1          | 1      | 0 | 0 | 0 | 1 Ref      |
| MT135462 | Unassigned | Unassigned | Unassigned | 1330_0 | Clustered           | 5 VC_1330_0  | 5  | 1      | 1          | 1      | 0 | 0 | 0 | 1 Ref      |
| MT135463 | Unassigned | Unassigned | Unassigned | 1498_0 | Clustered           | 8 VC_1498_0  | 8  | 0.9713 | 0.94517081 | 0.918  | 0 | 0 | 0 | 1 Ref      |
| MT136066 | Unassigned | Unassigned | Unassigned | 853_0  | Clustered           | 5 VC_853_0   | 5  | 0.8735 | 0.99999832 | 0.8735 | 0 | 0 | 0 | 1 Ref      |
| MT150133 | Unassigned | Unassigned | Unassigned | 297_5  | Clustered           | 14 VC_297_5  | 14 | 0.141  | 1          | 0.141  | 0 | 0 | 0 | 0.9231 Ref |
| MT151604 | Unassigned | Unassigned | Unassigned | 87_12  | Clustered/Singleton | 1 VC_87_12   | 1  | 0      | 1          | 0      | 0 | 0 | 0 | 1 Ref      |
| MT152150 | Unassigned | Unassigned | Unassigned | 646_0  | Clustered           | 3 VC_646_0   | 3  | 0.1223 | 0.99819199 | 0.122  | 0 | 0 | 0 | 1 Ref      |
| MT152698 | Unassigned | Unassigned | Unassigned | 1037_0 | Clustered           | 2 VC_1037_0  | 2  | 0.1804 | 0.72090768 | 0.1301 | 0 | 0 | 0 | 1 Ref      |
| MT157285 | Unassigned | Unassigned | Unassigned | 686_0  | Clustered           | 25 VC_686_0  | 25 | 0.5501 | 1          | 0.5501 | 0 | 0 | 0 | 0.96 Ref   |
| MT161381 | Unassigned | Unassigned | Unassigned | 127_0  | Clustered           | 17 VC_127_0  | 17 | 0.9222 | 1          | 0.9222 | 0 | 0 | 0 | 1 Ref      |
| MT161382 | Unassigned | Unassigned | Unassigned | 127_0  | Clustered           | 17 VC_127_0  | 17 | 0.9222 | 1          | 0.9222 | 0 | 0 | 0 | 1 Ref      |
| MT161383 | Unassigned | Unassigned | Unassigned | 127_0  | Clustered           | 17 VC_127_0  | 17 | 0.9222 | 1          | 0.9222 | 0 | 0 | 0 | 1 Ref      |
| MT161384 | Unassigned | Unassigned | Unassigned | 127_0  | Clustered           | 17 VC_127_0  | 17 | 0.9222 | 1          | 0.9222 | 0 | 0 | 0 | 1 Ref      |
| MT161459 | Unassigned | Unassigned | Unassigned | 457_1  | Clustered/Singleton | 1 VC_457_1   | 1  | 0      | 1          | 0      | 0 | 0 | 0 | 1 Ref      |
| MT162466 | Unassigned | Unassigned | Unassigned | 449_0  | Clustered           | 2 VC_449_0   | 2  | 0.0413 | 0.9567199  | 0.0395 | 0 | 0 | 0 | 1 Ref      |
| MT162467 | Unassigned | Unassigned | Unassigned | 449_0  | Clustered           | 2 VC_449_0   | 2  | 0.0413 | 0.9567199  | 0.0395 | 0 | 0 | 0 | 1 Ref      |
| MT176424 | Unassigned | Unassigned | Unassigned | 290_27 | Clustered/Singleton | 1 VC_290_27  | 1  | 0      | 1          | 0      | 0 | 0 | 0 | 1 Ref      |
| MT176425 | Unassigned | Unassigned | Unassigned | 290_49 | Clustered/Singleton | 1 VC_290_49  | 1  | 0      | 1          | 0      | 0 | 0 | 0 | 1 Ref      |



|          |            |            |            |         |                     |              |    |        |            |        |   |   |   |            |
|----------|------------|------------|------------|---------|---------------------|--------------|----|--------|------------|--------|---|---|---|------------|
| MT176426 | Unassigned | Unassigned | Unassigned | 290_28  | Clustered/Singleton | 1 VC_290_28  | 1  | 0      | 1          | 0      | 0 | 0 | 0 | 1 Ref      |
| MT178275 | Unassigned | Unassigned | Unassigned | 601_3   | Clustered           | 12 VC_601_3  | 12 | 0.2339 | 1          | 0.2339 | 0 | 0 | 0 | 0.8636 Ref |
| MT178448 | Unassigned | Unassigned | Unassigned | 861_0   | Clustered           | 29 VC_861_0  | 29 | 0.9954 | 1          | 0.9954 | 0 | 0 | 0 | 1 Ref      |
| MT178766 | Unassigned | Unassigned | Unassigned | 753_0   | Clustered           | 26 VC_753_0  | 26 | 0.9562 | 1          | 0.9562 | 0 | 0 | 0 | 1 Ref      |
| MT178767 | Unassigned | Unassigned | Unassigned | 753_0   | Clustered           | 26 VC_753_0  | 26 | 0.9562 | 1          | 0.9562 | 0 | 0 | 0 | 1 Ref      |
| MT179807 | Unassigned | Unassigned | Unassigned | 290_161 | Clustered/Singleton | 1 VC_290_161 | 1  | 0      | 1          | 0      | 0 | 0 | 0 | 1 Ref      |
| MT185428 | Unassigned | Unassigned | Unassigned | 1502_0  | Clustered           | 4 VC_1502_0  | 4  | 1      | 1          | 1      | 0 | 0 | 0 | 1 Ref      |
| MT188223 | Unassigned | Unassigned | Unassigned | 715_0   | Clustered           | 10 VC_715_0  | 10 | 0.8045 | 1          | 0.8045 | 0 | 0 | 0 | 1 Ref      |
| MT188662 | Unassigned | Unassigned | Unassigned | 17_0    | Clustered           | 9 VC_17_0    | 9  | 0.6954 | 1          | 0.6954 | 0 | 0 | 0 | 1 Ref      |
| MT188663 | Unassigned | Unassigned | Unassigned | 17_0    | Clustered           | 9 VC_17_0    | 9  | 0.6954 | 1          | 0.6954 | 0 | 0 | 0 | 1 Ref      |
| MT188664 | Unassigned | Unassigned | Unassigned | 17_0    | Clustered           | 9 VC_17_0    | 9  | 0.6954 | 1          | 0.6954 | 0 | 0 | 0 | 1 Ref      |
| MT188665 | Unassigned | Unassigned | Unassigned | 17_0    | Clustered           | 9 VC_17_0    | 9  | 0.6954 | 1          | 0.6954 | 0 | 0 | 0 | 1 Ref      |
| MT188666 | Unassigned | Unassigned | Unassigned | 17_0    | Clustered           | 9 VC_17_0    | 9  | 0.6954 | 1          | 0.6954 | 0 | 0 | 0 | 1 Ref      |
| MT193276 | Unassigned | Unassigned | Unassigned | 666_0   | Clustered           | 11 VC_666_0  | 11 | 0.5822 | 1          | 0.5822 | 0 | 0 | 0 | 1 Ref      |
| MT193890 | Unassigned | Unassigned | Unassigned | 17_0    | Clustered           | 9 VC_17_0    | 9  | 0.6954 | 1          | 0.6954 | 0 | 0 | 0 | 1 Ref      |
| MT197175 | Unassigned | Unassigned | Unassigned | 113_0   | Clustered           | 91 VC_113_0  | 91 | 0.9584 | 1          | 0.9584 | 0 | 0 | 0 | 1 Ref      |
| MT197176 | Unassigned | Unassigned | Unassigned | 113_0   | Clustered           | 91 VC_113_0  | 91 | 0.9584 | 1          | 0.9584 | 0 | 0 | 0 | 1 Ref      |
| MT210154 | Unassigned | Unassigned | Unassigned | 968_0   | Clustered           | 2 VC_968_0   | 2  | 0.858  | 0.92499224 | 0.7937 | 0 | 0 | 0 | 1 Ref      |
| MT215167 | Unassigned | Unassigned | Unassigned | 83_0    | Clustered           | 24 VC_83_0   | 24 | 0.7345 | 1          | 0.7345 | 0 | 0 | 0 | 1 Ref      |
| MT226657 | Unassigned | Unassigned | Unassigned | 155_8   | Clustered           | 66 VC_155_8  | 66 | 0.4537 | 1          | 0.4537 | 0 | 0 | 0 | 0.8182 Ref |
| MT227924 | Unassigned | Unassigned | Unassigned | 366_0   | Clustered           | 4 VC_366_0   | 4  | 0.1731 | 0.99998684 | 0.1731 | 0 | 0 | 0 | 0.8333 Ref |
| MT227925 | Unassigned | Unassigned | Unassigned | 1022_0  | Clustered           | 2 VC_1022_0  | 2  | 0.1197 | 0.95251219 | 0.114  | 0 | 0 | 0 | 1 Ref      |
| MT230534 | Unassigned | Unassigned | Unassigned | 816_0   | Clustered           | 35 VC_816_0  | 35 | 0.9824 | 1          | 0.9824 | 0 | 0 | 0 | 1 Ref      |
| MT233524 | Unassigned | Unassigned | Unassigned | 198_39  | Clustered/Singleton | 1 VC_198_39  | 1  | 0      | 1          | 0      | 0 | 0 | 0 | 1 Ref      |
| MT234338 | Unassigned | Unassigned | Unassigned | 808_0   | Clustered           | 3 VC_808_0   | 3  | 0.0803 | 0.99854428 | 0.0802 | 0 | 0 | 0 | 1 Ref      |
| MT234339 | Unassigned | Unassigned | Unassigned | 808_0   | Clustered           | 3 VC_808_0   | 3  | 0.0803 | 0.99854428 | 0.0802 | 0 | 0 | 0 | 1 Ref      |
| MT234340 | Unassigned | Unassigned | Unassigned | 808_0   | Clustered           | 3 VC_808_0   | 3  | 0.0803 | 0.99854428 | 0.0802 | 0 | 0 | 0 | 1 Ref      |
| MT234341 | Unassigned | Unassigned | Unassigned | 1005_0  | Clustered           | 3 VC_1005_0  | 3  | 0.8261 | 0.99765766 | 0.8242 | 0 | 0 | 0 | 1 Ref      |
| MT234342 | Unassigned | Unassigned | Unassigned | 1093_0  | Clustered           | 2 VC_1093_0  | 2  | 0.0767 | 0.94600647 | 0.0725 | 0 | 0 | 0 | 1 Ref      |
| MT234343 | Unassigned | Unassigned | Unassigned | 1093_0  | Clustered           | 2 VC_1093_0  | 2  | 0.0767 | 0.94600647 | 0.0725 | 0 | 0 | 0 | 1 Ref      |
| MT234670 | Unassigned | Unassigned | Unassigned | 1503_0  | Clustered           | 2 VC_1503_0  | 2  | 1      | 1          | 1      | 0 | 0 | 0 | 1 Ref      |
| MT239398 | Unassigned | Unassigned | Unassigned | 235_0   | Clustered           | 60 VC_235_0  | 60 | 0.9413 | 1          | 0.9413 | 0 | 0 | 0 | 1 Ref      |
| MT241605 | Unassigned | Unassigned | Unassigned | 177_0   | Clustered           | 8 VC_177_0   | 8  | 0.5848 | 1          | 0.5848 | 0 | 0 | 0 | 1 Ref      |
| MT241607 | Unassigned | Unassigned | Unassigned | 177_0   | Clustered           | 8 VC_177_0   | 8  | 0.5848 | 1          | 0.5848 | 0 | 0 | 0 | 1 Ref      |
| MT251347 | Unassigned | Unassigned | Unassigned | 372_0   | Clustered           | 7 VC_372_0   | 7  | 0.3691 | 1          | 0.3691 | 0 | 0 | 0 | 1 Ref      |
| MT251348 | Unassigned | Unassigned | Unassigned | 372_0   | Clustered           | 7 VC_372_0   | 7  | 0.3691 | 1          | 0.3691 | 0 | 0 | 0 | 1 Ref      |
| MT254578 | Unassigned | Unassigned | Unassigned | 489_2   | Clustered           | 3 VC_489_2   | 3  | 0.0584 | 0.98697745 | 0.0577 | 0 | 0 | 0 | 1 Ref      |
| MT261384 | Unassigned | Unassigned | Unassigned | 492_0   | Clustered           | 20 VC_492_0  | 20 | 0.7887 | 1          | 0.7887 | 0 | 0 | 0 | 1 Ref      |
| MT263719 | Unassigned | Unassigned | Unassigned | 714_0   | Clustered           | 71 VC_714_0  | 71 | 0.935  | 1          | 0.935  | 0 | 0 | 0 | 1 Ref      |
| MT270409 | Unassigned | Unassigned | Unassigned | 1012_1  | Clustered           | 2 VC_1012_1  | 2  | 0.0779 | 0.93977186 | 0.0732 | 0 | 0 | 0 | 1 Ref      |
| MT276994 | Unassigned | Unassigned | Unassigned | 1233_0  | Clustered           | 9 VC_1233_0  | 9  | 0.9676 | 1          | 0.9676 | 0 | 0 | 0 | 1 Ref      |
| MT310850 | Unassigned | Unassigned | Unassigned | 898_1   | Clustered           | 27 VC_898_1  | 27 | 0.8894 | 1          | 0.8894 | 0 | 0 | 0 | 1 Ref      |
| MT310851 | Unassigned | Unassigned | Unassigned | 1296_0  | Clustered           | 82 VC_1296_0 | 82 | 0.7938 | 1          | 0.7938 | 0 | 0 | 0 | 1 Ref      |
| MT310852 | Unassigned | Unassigned | Unassigned | 901_0   | Clustered           | 31 VC_901_0  | 31 | 0.8235 | 1          | 0.8235 | 0 | 0 | 0 | 0.8194 Ref |
| MT310853 | Unassigned | Unassigned | Unassigned | 1287_0  | Clustered           | 44 VC_1287_0 | 44 | 1      | 1          | 1      | 0 | 0 | 0 | 1 Ref      |
| MT310854 | Unassigned | Unassigned | Unassigned | 901_0   | Clustered           | 31 VC_901_0  | 31 | 0.8235 | 1          | 0.8235 | 0 | 0 | 0 | 0.8194 Ref |
| MT310855 | Unassigned | Unassigned | Unassigned | 1202_0  | Clustered           | 10 VC_1202_0 | 10 | 0.5679 | 1          | 0.5679 | 0 | 0 | 0 | 1 Ref      |
| MT310856 | Unassigned | Unassigned | Unassigned | 1296_0  | Clustered           | 82 VC_1296_0 | 82 | 0.7938 | 1          | 0.7938 | 0 | 0 | 0 | 1 Ref      |
| MT310858 | Unassigned | Unassigned | Unassigned | 223_7   | Clustered/Singleton | 1 VC_223_7   | 1  | 0      | 1          | 0      | 0 | 0 | 0 | 1 Ref      |
| MT310859 | Unassigned | Unassigned | Unassigned | 244_3   | Clustered           | 8 VC_244_3   | 8  | 0.1086 | 1          | 0.1086 | 0 | 0 | 0 | 1 Ref      |
| MT310860 | Unassigned | Unassigned | Unassigned | 244_3   | Clustered           | 8 VC_244_3   | 8  | 0.1086 | 1          | 0.1086 | 0 | 0 | 0 | 1 Ref      |
| MT310861 | Unassigned | Unassigned | Unassigned | 1296_0  | Clustered           | 82 VC_1296_0 | 82 | 0.7938 | 1          | 0.7938 | 0 | 0 | 0 | 1 Ref      |
| MT310863 | Unassigned | Unassigned | Unassigned | 1015_1  | Clustered           | 26 VC_1015_1 | 26 | 0.6989 | 1          | 0.6989 | 0 | 0 | 0 | 1 Ref      |
| MT310864 | Unassigned | Unassigned | Unassigned | 1407_0  | Clustered           | 78 VC_1407_0 | 78 | 0.9731 | 1          | 0.9731 | 0 | 0 | 0 | 1 Ref      |
| MT310865 | Unassigned | Unassigned | Unassigned | 1114_2  | Clustered           | 5 VC_1114_2  | 5  | 0.0531 | 0.99997362 | 0.0531 | 0 | 0 | 0 | 0.9 Ref    |
| MT310866 | Unassigned | Unassigned | Unassigned | 1296_0  | Clustered           | 82 VC_1296_0 | 82 | 0.7938 | 1          | 0.7938 | 0 | 0 | 0 | 1 Ref      |
| MT310867 | Unassigned | Unassigned | Unassigned | 384_12  | Clustered           | 4 VC_384_12  | 4  | 0.0125 | 0.99998491 | 0.0125 | 0 | 0 | 0 | 0.8333 Ref |
| MT310868 | Unassigned | Unassigned | Unassigned | 384_11  | Clustered           | 31 VC_384_11 | 31 | 0.0926 | 1          | 0.0926 | 0 | 0 | 0 | 0.7011 Ref |
| MT310869 | Unassigned | Unassigned | Unassigned | 1424_0  | Clustered           | 31 VC_1424_0 | 31 | 0.8834 | 1          | 0.8834 | 0 | 0 | 0 | 1 Ref      |
| MT310870 | Unassigned | Unassigned | Unassigned | 385_0   | Clustered           | 24 VC_385_0  | 24 | 0.5516 | 1          | 0.5516 | 0 | 0 | 0 | 1 Ref      |
| MT310871 | Unassigned | Unassigned | Unassigned | 527_0   | Clustered           | 37 VC_527_0  | 37 | 0.9679 | 1          | 0.9679 | 0 | 0 | 0 | 1 Ref      |
| MT310872 | Unassigned | Unassigned | Unassigned | 1219_0  | Clustered           | 24 VC_1219_0 | 24 | 0.9519 | 1          | 0.9519 | 0 | 0 | 0 | 1 Ref      |
| MT310873 | Unassigned | Unassigned | Unassigned | 1296_0  | Clustered           | 82 VC_1296_0 | 82 | 0.7938 | 1          | 0.7938 | 0 | 0 | 0 | 1 Ref      |
| MT310874 | Unassigned | Unassigned | Unassigned | 882_0   | Clustered           | 11 VC_882_0  | 11 | 0.943  | 1          | 0.943  | 0 | 0 | 0 | 1 Ref      |
| MT310875 | Unassigned | Unassigned | Unassigned | 1424_0  | Clustered           | 31 VC_1424_0 | 31 | 0.8834 | 1          | 0.8834 | 0 | 0 | 0 | 1 Ref      |
| MT310876 | Unassigned | Unassigned | Unassigned | 222_1   | Clustered           | 19 VC_222_1  | 19 | 0.4166 | 1          | 0.4166 | 0 | 0 | 0 | 1 Ref      |
| MT310877 | Unassigned | Unassigned | Unassigned | 223_6   | Clustered           | 42 VC_223_6  | 42 | 0.4717 | 1          | 0.4717 | 0 | 0 | 0 | 0.8351 Ref |
| MT310878 | Unassigned | Unassigned | Unassigned | 531_0   | Clustered           | 32 VC_531_0  | 32 | 0.6859 | 1          | 0.6859 | 0 | 0 | 0 | 1 Ref      |
| MT310879 | Unassigned | Unassigned | Unassigned | 531_0   | Clustered           | 32 VC_531_0  | 32 | 0.6859 | 1          | 0.6859 | 0 | 0 | 0 | 1 Ref      |
| MT310880 | Unassigned | Unassigned | Unassigned | 531_0   | Clustered           | 32 VC_531_0  | 32 | 0.6859 | 1          | 0.6859 | 0 | 0 | 0 | 1 Ref      |
| MT310881 | Unassigned | Unassigned | Unassigned | 531_0   | Clustered           | 32 VC_531_0  | 32 | 0.6859 | 1          | 0.6859 | 0 | 0 | 0 | 1 Ref      |
| MT310882 | Unassigned | Unassigned | Unassigned | 241_0   | Clustered           | 21 VC_241_0  | 21 | 0.8342 | 1          | 0.8342 | 0 | 0 | 0 | 1 Ref      |
| MT310883 | Unassigned | Unassigned | Unassigned | 222_1   | Clustered           | 19 VC_222_1  | 19 | 0.4166 | 1          | 0.4166 | 0 | 0 | 0 | 1 Ref      |
| MT310884 | Unassigned | Unassigned | Unassigned | 222_1   | Clustered           | 19 VC_222_1  | 19 | 0.4166 | 1          | 0.4166 | 0 | 0 | 0 | 1 Ref      |
| MT310885 | Unassigned | Unassigned | Unassigned | 222_1   | Clustered           | 19 VC_222_1  | 19 | 0.4166 | 1          | 0.4166 | 0 | 0 | 0 | 1 Ref      |
| MT310886 | Unassigned | Unassigned | Unassigned | 223_6   | Clustered           | 42 VC_223_6  | 42 | 0.4717 | 1          | 0.4717 | 0 | 0 | 0 | 0.8351 Ref |
| MT310887 | Unassigned | Unassigned | Unassigned | 1424_0  | Clustered           | 31 VC_1424_0 | 31 | 0.8834 | 1          | 0.8834 | 0 | 0 | 0 | 1 Ref      |
| MT310888 | Unassigned | Unassigned | Unassigned | 1424_0  | Clustered           | 31 VC_1424_0 | 31 | 0.8834 | 1          | 0.8834 | 0 | 0 | 0 | 1 Ref      |
| MT310889 | Unassigned | Unassigned | Unassigned | 1424_0  | Clustered           | 31 VC_1424_0 | 31 | 0.8834 | 1          | 0.8834 | 0 | 0 | 0 | 1 Ref      |
| MT310890 | Unassigned | Unassigned | Unassigned | 1424_0  | Clustered           | 31 VC_1424_0 | 31 | 0.8834 | 1          | 0.8834 | 0 | 0 | 0 | 1 Ref      |
| MT310891 | Unassigned | Unassigned | Unassigned | 1424_0  | Clustered           | 31 VC_1424_0 | 31 | 0.8834 | 1          | 0.8834 | 0 | 0 | 0 | 1 Ref      |



|          |            |            |            |        |                     |              |     |        |            |        |   |   |   |            |
|----------|------------|------------|------------|--------|---------------------|--------------|-----|--------|------------|--------|---|---|---|------------|
| MT310892 | Unassigned | Unassigned | Unassigned | 527_0  | Clustered           | 37 VC_527_0  | 37  | 0.9679 | 1          | 0.9679 | 0 | 0 | 0 | 1 Ref      |
| MT310893 | Unassigned | Unassigned | Unassigned | 538_38 | Clustered           | 6 VC_538_38  | 6   | 0.0517 | 1          | 0.0517 | 0 | 0 | 0 | 0.8667 Ref |
| MT310895 | Unassigned | Unassigned | Unassigned | 1116_0 | Clustered           | 24 VC_1116_0 | 24  | 0.8376 | 1          | 0.8376 | 0 | 0 | 0 | 1 Ref      |
| MT310896 | Unassigned | Unassigned | Unassigned | 1287_0 | Clustered           | 44 VC_1287_0 | 44  | 1      | 1          | 1      | 0 | 0 | 0 | 1 Ref      |
| MT310897 | Unassigned | Unassigned | Unassigned | 335_5  | Clustered           | 11 VC_335_5  | 11  | 0.0469 | 1          | 0.0469 | 0 | 0 | 0 | 0.7636 Ref |
| MT310898 | Unassigned | Unassigned | Unassigned | 1199_1 | Clustered           | 2 VC_1199_1  | 2   | 0.1356 | 0.9073018  | 0.1231 | 0 | 0 | 0 | 1 Ref      |
| MT311645 | Unassigned | Unassigned | Unassigned | 198_23 | Clustered           | 10 VC_198_23 | 10  | 0.0697 | 1          | 0.0697 | 0 | 0 | 0 | 0.8444 Ref |
| MT316458 | Unassigned | Unassigned | Unassigned | 1407_0 | Clustered           | 78 VC_1407_0 | 78  | 0.9731 | 1          | 0.9731 | 0 | 0 | 0 | 1 Ref      |
| MT316459 | Unassigned | Unassigned | Unassigned | 1407_0 | Clustered           | 78 VC_1407_0 | 78  | 0.9731 | 1          | 0.9731 | 0 | 0 | 0 | 1 Ref      |
| MT316460 | Unassigned | Unassigned | Unassigned | 384_11 | Clustered           | 31 VC_384_11 | 31  | 0.0926 | 1          | 0.0926 | 0 | 0 | 0 | 0.7011 Ref |
| MT316461 | Unassigned | Unassigned | Unassigned | 743_0  | Clustered           | 3 VC_743_0   | 3   | 0.3955 | 0.99850259 | 0.3949 | 0 | 0 | 0 | 1 Ref      |
| MT316462 | Unassigned | Unassigned | Unassigned | 1407_0 | Clustered           | 78 VC_1407_0 | 78  | 0.9731 | 1          | 0.9731 | 0 | 0 | 0 | 1 Ref      |
| MT316463 | Unassigned | Unassigned | Unassigned | 384_11 | Clustered           | 31 VC_384_11 | 31  | 0.0926 | 1          | 0.0926 | 0 | 0 | 0 | 0.7011 Ref |
| MT322327 | Unassigned | Unassigned | Unassigned | 340_17 | Clustered           | 4 VC_340_17  | 4   | 0.0161 | 0.99996247 | 0.0161 | 0 | 0 | 0 | 1 Ref      |
| MT331608 | Unassigned | Unassigned | Unassigned | 859_0  | Clustered           | 67 VC_859_0  | 67  | 0.9622 | 1          | 0.9622 | 0 | 0 | 0 | 1 Ref      |
| MT334653 | Unassigned | Unassigned | Unassigned | 687_1  | Clustered           | 10 VC_687_1  | 10  | 0.1263 | 1          | 0.1263 | 0 | 0 | 0 | 0.9778 Ref |
| MT338525 | Unassigned | Unassigned | Unassigned | 155_8  | Clustered           | 66 VC_155_8  | 66  | 0.4537 | 1          | 0.4537 | 0 | 0 | 0 | 0.8182 Ref |
| MT341500 | Unassigned | Unassigned | Unassigned | 687_0  | Clustered           | 21 VC_687_0  | 21  | 0.3608 | 1          | 0.3608 | 0 | 0 | 0 | 1 Ref      |
| MT344103 | Unassigned | Unassigned | Unassigned | 1232_0 | Clustered           | 3 VC_1232_0  | 3   | 0.8981 | 0.9944138  | 0.893  | 0 | 0 | 0 | 1 Ref      |
| MT344104 | Unassigned | Unassigned | Unassigned | 1232_0 | Clustered           | 3 VC_1232_0  | 3   | 0.8981 | 0.9944138  | 0.893  | 0 | 0 | 0 | 1 Ref      |
| MT344105 | Unassigned | Unassigned | Unassigned | 1232_0 | Clustered           | 3 VC_1232_0  | 3   | 0.8981 | 0.9944138  | 0.893  | 0 | 0 | 0 | 1 Ref      |
| MT349888 | Unassigned | Unassigned | Unassigned | 80_0   | Clustered           | 64 VC_80_0   | 64  | 0.418  | 1          | 0.418  | 0 | 0 | 0 | 0.7649 Ref |
| MT350292 | Unassigned | Unassigned | Unassigned | 465_0  | Clustered           | 80 VC_465_0  | 80  | 0.9988 | 1          | 0.9988 | 0 | 0 | 0 | 1 Ref      |
| MT350293 | Unassigned | Unassigned | Unassigned | 405_0  | Clustered           | 126 VC_405_0 | 126 | 0.9614 | 1          | 0.9614 | 0 | 0 | 0 | 1 Ref      |
| MT354569 | Unassigned | Unassigned | Unassigned | 740_0  | Clustered           | 4 VC_740_0   | 4   | 0.4223 | 0.99997355 | 0.4223 | 0 | 0 | 0 | 1 Ref      |
| MT354570 | Unassigned | Unassigned | Unassigned | 161_0  | Clustered           | 14 VC_161_0  | 14  | 0.6064 | 1          | 0.6064 | 0 | 0 | 0 | 1 Ref      |
| MT360680 | Unassigned | Unassigned | Unassigned | 113_0  | Clustered           | 91 VC_113_0  | 91  | 0.9584 | 1          | 0.9584 | 0 | 0 | 0 | 1 Ref      |
| MT360681 | Unassigned | Unassigned | Unassigned | 975_0  | Clustered           | 40 VC_975_0  | 40  | 0.6888 | 1          | 0.6888 | 0 | 0 | 0 | 1 Ref      |
| MT361768 | Unassigned | Unassigned | Unassigned | 168_0  | Clustered           | 18 VC_168_0  | 18  | 0.7394 | 1          | 0.7394 | 0 | 0 | 0 | 0.8627 Ref |
| MT361972 | Unassigned | Unassigned | Unassigned | 441_1  | Clustered           | 8 VC_441_1   | 8   | 0.5443 | 1          | 0.5443 | 0 | 0 | 0 | 0.9643 Ref |
| MT366568 | Unassigned | Unassigned | Unassigned | 8_0    | Clustered           | 58 VC_8_0    | 58  | 0.8285 | 1          | 0.8285 | 0 | 0 | 0 | 0.9946 Ref |
| MT366580 | Unassigned | Unassigned | Unassigned | 238_0  | Clustered           | 3 VC_238_0   | 3   | 0.2285 | 0.99828147 | 0.2281 | 0 | 0 | 0 | 1 Ref      |
| MT366760 | Unassigned | Unassigned | Unassigned | 66_0   | Clustered           | 2 VC_66_0    | 2   | 0.1789 | 0.95553798 | 0.171  | 0 | 0 | 0 | 1 Ref      |
| MT366761 | Unassigned | Unassigned | Unassigned | 66_0   | Clustered           | 2 VC_66_0    | 2   | 0.1789 | 0.95553798 | 0.171  | 0 | 0 | 0 | 1 Ref      |
| MT366762 | Unassigned | Unassigned | Unassigned | 138_0  | Clustered           | 2 VC_138_0   | 2   | 0.0413 | 0.95740923 | 0.0395 | 0 | 0 | 0 | 1 Ref      |
| MT366931 | Unassigned | Unassigned | Unassigned | 464_0  | Clustered           | 16 VC_464_0  | 16  | 0.9558 | 1          | 0.9558 | 0 | 0 | 0 | 1 Ref      |
| MT366932 | Unassigned | Unassigned | Unassigned | 464_0  | Clustered           | 16 VC_464_0  | 16  | 0.9558 | 1          | 0.9558 | 0 | 0 | 0 | 1 Ref      |
| MT366933 | Unassigned | Unassigned | Unassigned | 464_0  | Clustered           | 16 VC_464_0  | 16  | 0.9558 | 1          | 0.9558 | 0 | 0 | 0 | 1 Ref      |
| MT366934 | Unassigned | Unassigned | Unassigned | 464_0  | Clustered           | 16 VC_464_0  | 16  | 0.9558 | 1          | 0.9558 | 0 | 0 | 0 | 1 Ref      |
| MT366935 | Unassigned | Unassigned | Unassigned | 464_0  | Clustered           | 16 VC_464_0  | 16  | 0.9558 | 1          | 0.9558 | 0 | 0 | 0 | 1 Ref      |
| MT366936 | Unassigned | Unassigned | Unassigned | 464_0  | Clustered           | 16 VC_464_0  | 16  | 0.9558 | 1          | 0.9558 | 0 | 0 | 0 | 1 Ref      |
| MT366937 | Unassigned | Unassigned | Unassigned | 464_0  | Clustered           | 16 VC_464_0  | 16  | 0.9558 | 1          | 0.9558 | 0 | 0 | 0 | 1 Ref      |
| MT366938 | Unassigned | Unassigned | Unassigned | 464_0  | Clustered           | 16 VC_464_0  | 16  | 0.9558 | 1          | 0.9558 | 0 | 0 | 0 | 1 Ref      |
| MT366939 | Unassigned | Unassigned | Unassigned | 464_0  | Clustered           | 16 VC_464_0  | 16  | 0.9558 | 1          | 0.9558 | 0 | 0 | 0 | 1 Ref      |
| MT366940 | Unassigned | Unassigned | Unassigned | 464_0  | Clustered           | 16 VC_464_0  | 16  | 0.9558 | 1          | 0.9558 | 0 | 0 | 0 | 1 Ref      |
| MT366941 | Unassigned | Unassigned | Unassigned | 464_0  | Clustered           | 16 VC_464_0  | 16  | 0.9558 | 1          | 0.9558 | 0 | 0 | 0 | 1 Ref      |
| MT366942 | Unassigned | Unassigned | Unassigned | 464_0  | Clustered           | 16 VC_464_0  | 16  | 0.9558 | 1          | 0.9558 | 0 | 0 | 0 | 1 Ref      |
| MT366943 | Unassigned | Unassigned | Unassigned | 464_0  | Clustered           | 16 VC_464_0  | 16  | 0.9558 | 1          | 0.9558 | 0 | 0 | 0 | 1 Ref      |
| MT366944 | Unassigned | Unassigned | Unassigned | 464_0  | Clustered           | 16 VC_464_0  | 16  | 0.9558 | 1          | 0.9558 | 0 | 0 | 0 | 1 Ref      |
| MT366945 | Unassigned | Unassigned | Unassigned | 91_2   | Clustered           | 5 VC_91_2    | 5   | 0.2025 | 0.99999726 | 0.2025 | 0 | 0 | 0 | 1 Ref      |
| MT366946 | Unassigned | Unassigned | Unassigned | 91_2   | Clustered           | 5 VC_91_2    | 5   | 0.2025 | 0.99999726 | 0.2025 | 0 | 0 | 0 | 1 Ref      |
| MT366947 | Unassigned | Unassigned | Unassigned | 91_2   | Clustered           | 5 VC_91_2    | 5   | 0.2025 | 0.99999726 | 0.2025 | 0 | 0 | 0 | 1 Ref      |
| MT366948 | Unassigned | Unassigned | Unassigned | 91_2   | Clustered           | 5 VC_91_2    | 5   | 0.2025 | 0.99999726 | 0.2025 | 0 | 0 | 0 | 1 Ref      |
| MT374852 | Unassigned | Unassigned | Unassigned | 52_0   | Clustered           | 9 VC_52_0    | 9   | 0.5586 | 1          | 0.5586 | 0 | 0 | 0 | 1 Ref      |
| MT374853 | Unassigned | Unassigned | Unassigned | 52_0   | Clustered           | 9 VC_52_0    | 9   | 0.5586 | 1          | 0.5586 | 0 | 0 | 0 | 1 Ref      |
| MT374854 | Unassigned | Unassigned | Unassigned | 52_0   | Clustered           | 9 VC_52_0    | 9   | 0.5586 | 1          | 0.5586 | 0 | 0 | 0 | 1 Ref      |
| MT374855 | Unassigned | Unassigned | Unassigned | 235_0  | Clustered           | 60 VC_235_0  | 60  | 0.9413 | 1          | 0.9413 | 0 | 0 | 0 | 1 Ref      |
| MT374856 | Unassigned | Unassigned | Unassigned | 52_0   | Clustered           | 9 VC_52_0    | 9   | 0.5586 | 1          | 0.5586 | 0 | 0 | 0 | 1 Ref      |
| MT374857 | Unassigned | Unassigned | Unassigned | 235_0  | Clustered           | 60 VC_235_0  | 60  | 0.9413 | 1          | 0.9413 | 0 | 0 | 0 | 1 Ref      |
| MT374858 | Unassigned | Unassigned | Unassigned | 235_0  | Clustered           | 60 VC_235_0  | 60  | 0.9413 | 1          | 0.9413 | 0 | 0 | 0 | 1 Ref      |
| MT374859 | Unassigned | Unassigned | Unassigned | 399_0  | Clustered           | 49 VC_399_0  | 49  | 0.7927 | 1          | 0.7927 | 0 | 0 | 0 | 1 Ref      |
| MT375042 | Unassigned | Unassigned | Unassigned | 127_0  | Clustered           | 17 VC_127_0  | 17  | 0.9222 | 1          | 0.9222 | 0 | 0 | 0 | 1 Ref      |
| MT375519 | Unassigned | Unassigned | Unassigned | 503_0  | Clustered           | 2 VC_503_0   | 2   | 0.2546 | 0.94897583 | 0.2416 | 0 | 0 | 0 | 1 Ref      |
| MT375520 | Unassigned | Unassigned | Unassigned | 496_0  | Clustered           | 22 VC_496_0  | 22  | 0.6101 | 1          | 0.6101 | 0 | 0 | 0 | 1 Ref      |
| MT375521 | Unassigned | Unassigned | Unassigned | 496_0  | Clustered           | 22 VC_496_0  | 22  | 0.6101 | 1          | 0.6101 | 0 | 0 | 0 | 1 Ref      |
| MT375525 | Unassigned | Unassigned | Unassigned | 502_0  | Clustered           | 18 VC_502_0  | 18  | 0.8808 | 1          | 0.8808 | 0 | 0 | 0 | 1 Ref      |
| MT375526 | Unassigned | Unassigned | Unassigned | 496_0  | Clustered           | 22 VC_496_0  | 22  | 0.6101 | 1          | 0.6101 | 0 | 0 | 0 | 1 Ref      |
| MT375527 | Unassigned | Unassigned | Unassigned | 496_0  | Clustered           | 22 VC_496_0  | 22  | 0.6101 | 1          | 0.6101 | 0 | 0 | 0 | 1 Ref      |
| MT375528 | Unassigned | Unassigned | Unassigned | 496_0  | Clustered           | 22 VC_496_0  | 22  | 0.6101 | 1          | 0.6101 | 0 | 0 | 0 | 1 Ref      |
| MT375529 | Unassigned | Unassigned | Unassigned | 503_0  | Clustered           | 2 VC_503_0   | 2   | 0.2546 | 0.94897583 | 0.2416 | 0 | 0 | 0 | 1 Ref      |
| MT375530 | Unassigned | Unassigned | Unassigned | 496_0  | Clustered           | 22 VC_496_0  | 22  | 0.6101 | 1          | 0.6101 | 0 | 0 | 0 | 1 Ref      |
| MT375531 | Unassigned | Unassigned | Unassigned | 496_0  | Clustered           | 22 VC_496_0  | 22  | 0.6101 | 1          | 0.6101 | 0 | 0 | 0 | 1 Ref      |
| MT380195 | Unassigned | Unassigned | Unassigned | 200_0  | Clustered           | 15 VC_200_0  | 15  | 0.5004 | 1          | 0.5004 | 0 | 0 | 0 | 1 Ref      |
| MT385367 | Unassigned | Unassigned | Unassigned | 510_1  | Clustered           | 20 VC_510_1  | 20  | 0.4172 | 1          | 0.4172 | 0 | 0 | 0 | 1 Ref      |
| MT408532 | Unassigned | Unassigned | Unassigned | 446_4  | Clustered/Singleton | 1 VC_446_4   | 1   | 0      | 1          | 0      | 0 | 0 | 0 | 1 Ref      |
| MT409116 | Unassigned | Unassigned | Unassigned | 510_1  | Clustered           | 20 VC_510_1  | 20  | 0.4172 | 1          | 0.4172 | 0 | 0 | 0 | 1 Ref      |
| MT409176 | Unassigned | Unassigned | Unassigned | 340_16 | Clustered           | 4 VC_340_16  | 4   | 0.0157 | 0.9999807  | 0.0157 | 0 | 0 | 0 | 1 Ref      |
| MT411892 | Unassigned | Unassigned | Unassigned | 155_9  | Clustered           | 3 VC_155_9   | 3   | 0.0083 | 0.97241045 | 0.0081 | 0 | 0 | 0 | 1 Ref      |
| MT413450 | Unassigned | Unassigned | Unassigned | 80_0   | Clustered           | 64 VC_80_0   | 64  | 0.418  | 1          | 0.418  | 0 | 0 | 0 | 0.7649 Ref |
| MT416090 | Unassigned | Unassigned | Unassigned | 863_0  | Clustered           | 5 VC_863_0   | 5   | 0.1633 | 0.99999995 | 0.1633 | 0 | 0 | 0 | 1 Ref      |
| MT419366 | Unassigned | Unassigned | Unassigned | 398_0  | Clustered           | 51 VC_398_0  | 51  | 0.8741 | 1          | 0.8741 | 0 | 0 | 0 | 1 Ref      |



|          |            |            |            |        |                     |              |     |        |            |        |   |   |   |            |
|----------|------------|------------|------------|--------|---------------------|--------------|-----|--------|------------|--------|---|---|---|------------|
| MT422786 | Unassigned | Unassigned | Unassigned | 102_0  | Clustered           | 15 VC_102_0  | 15  | 0.653  | 1          | 0.653  | 0 | 0 | 0 | 1 Ref      |
| MT423823 | Unassigned | Unassigned | Unassigned | 11_0   | Clustered           | 19 VC_11_0   | 19  | 0.7544 | 1          | 0.7544 | 0 | 0 | 0 | 1 Ref      |
| MT423824 | Unassigned | Unassigned | Unassigned | 11_0   | Clustered           | 19 VC_11_0   | 19  | 0.7544 | 1          | 0.7544 | 0 | 0 | 0 | 1 Ref      |
| MT424636 | Unassigned | Unassigned | Unassigned | 352_0  | Clustered           | 31 VC_352_0  | 31  | 0.9547 | 1          | 0.9547 | 0 | 0 | 0 | 1 Ref      |
| MT425185 | Unassigned | Unassigned | Unassigned | 848_0  | Clustered           | 124 VC_848_0 | 124 | 0.9484 | 1          | 0.9484 | 0 | 0 | 0 | 1 Ref      |
| MT426122 | Unassigned | Unassigned | Unassigned | 1215_0 | Clustered           | 4 VC_1215_0  | 4   | 1      | 1          | 1      | 0 | 0 | 0 | 1 Ref      |
| MT427400 | Unassigned | Unassigned | Unassigned | 595_0  | Clustered           | 35 VC_595_0  | 35  | 0.8809 | 1          | 0.8809 | 0 | 0 | 0 | 1 Ref      |
| MT430910 | Unassigned | Unassigned | Unassigned | 477_0  | Clustered           | 4 VC_477_0   | 4   | 0.7825 | 0.99997292 | 0.7825 | 0 | 0 | 0 | 1 Ref      |
| MT431535 | Unassigned | Unassigned | Unassigned | 944_0  | Clustered           | 76 VC_944_0  | 76  | 0.9789 | 1          | 0.9789 | 0 | 0 | 0 | 1 Ref      |
| MT438396 | Unassigned | Unassigned | Unassigned | 601_3  | Clustered           | 12 VC_601_3  | 12  | 0.2339 | 1          | 0.2339 | 0 | 0 | 0 | 0.8636 Ref |
| MT438761 | Unassigned | Unassigned | Unassigned | 753_0  | Clustered           | 26 VC_753_0  | 26  | 0.9562 | 1          | 0.9562 | 0 | 0 | 0 | 1 Ref      |
| MT442039 | Unassigned | Unassigned | Unassigned | 1008_0 | Clustered           | 6 VC_1008_0  | 6   | 0.2856 | 1          | 0.2856 | 0 | 0 | 0 | 1 Ref      |
| MT446386 | Unassigned | Unassigned | Unassigned | 837_1  | Clustered           | 24 VC_837_1  | 24  | 0.5328 | 1          | 0.5328 | 0 | 0 | 0 | 1 Ref      |
| MT446387 | Unassigned | Unassigned | Unassigned | 290_61 | Clustered/Singleton | 1 VC_290_61  | 1   | 0      | 1          | 0      | 0 | 0 | 0 | 1 Ref      |
| MT446388 | Unassigned | Unassigned | Unassigned | 340_7  | Clustered           | 18 VC_340_7  | 18  | 0.0936 | 1          | 0.0936 | 0 | 0 | 0 | 0.7778 Ref |
| MT446389 | Unassigned | Unassigned | Unassigned | 859_0  | Clustered           | 67 VC_859_0  | 67  | 0.9622 | 1          | 0.9622 | 0 | 0 | 0 | 1 Ref      |
| MT446390 | Unassigned | Unassigned | Unassigned | 293_10 | Clustered           | 9 VC_293_10  | 9   | 0.0615 | 0.99999884 | 0.0615 | 0 | 0 | 0 | 0.6667 Ref |
| MT446391 | Unassigned | Unassigned | Unassigned | 859_0  | Clustered           | 67 VC_859_0  | 67  | 0.9622 | 1          | 0.9622 | 0 | 0 | 0 | 1 Ref      |
| MT446392 | Unassigned | Unassigned | Unassigned | 297_3  | Clustered           | 2 VC_297_3   | 2   | 0.0101 | 0.92273843 | 0.0093 | 0 | 0 | 0 | 1 Ref      |
| MT446393 | Unassigned | Unassigned | Unassigned | 465_0  | Clustered           | 80 VC_465_0  | 80  | 0.9988 | 1          | 0.9988 | 0 | 0 | 0 | 1 Ref      |
| MT446394 | Unassigned | Unassigned | Unassigned | 465_0  | Clustered           | 80 VC_465_0  | 80  | 0.9988 | 1          | 0.9988 | 0 | 0 | 0 | 1 Ref      |
| MT446396 | Unassigned | Unassigned | Unassigned | 297_0  | Clustered           | 10 VC_297_0  | 10  | 0.0971 | 1          | 0.0971 | 0 | 0 | 0 | 1 Ref      |
| MT446397 | Unassigned | Unassigned | Unassigned | 816_0  | Clustered           | 35 VC_816_0  | 35  | 0.9824 | 1          | 0.9824 | 0 | 0 | 0 | 1 Ref      |
| MT446398 | Unassigned | Unassigned | Unassigned | 816_0  | Clustered           | 35 VC_816_0  | 35  | 0.9824 | 1          | 0.9824 | 0 | 0 | 0 | 1 Ref      |
| MT446399 | Unassigned | Unassigned | Unassigned | 816_0  | Clustered           | 35 VC_816_0  | 35  | 0.9824 | 1          | 0.9824 | 0 | 0 | 0 | 1 Ref      |
| MT446400 | Unassigned | Unassigned | Unassigned | 816_0  | Clustered           | 35 VC_816_0  | 35  | 0.9824 | 1          | 0.9824 | 0 | 0 | 0 | 1 Ref      |
| MT446402 | Unassigned | Unassigned | Unassigned | 816_0  | Clustered           | 35 VC_816_0  | 35  | 0.9824 | 1          | 0.9824 | 0 | 0 | 0 | 1 Ref      |
| MT446403 | Unassigned | Unassigned | Unassigned | 816_0  | Clustered           | 35 VC_816_0  | 35  | 0.9824 | 1          | 0.9824 | 0 | 0 | 0 | 1 Ref      |
| MT446405 | Unassigned | Unassigned | Unassigned | 636_0  | Clustered           | 13 VC_636_0  | 13  | 0.6223 | 1          | 0.6223 | 0 | 0 | 0 | 1 Ref      |
| MT446406 | Unassigned | Unassigned | Unassigned | 816_0  | Clustered           | 35 VC_816_0  | 35  | 0.9824 | 1          | 0.9824 | 0 | 0 | 0 | 1 Ref      |
| MT446407 | Unassigned | Unassigned | Unassigned | 837_0  | Clustered           | 12 VC_837_0  | 12  | 0.2327 | 1          | 0.2327 | 0 | 0 | 0 | 1 Ref      |
| MT446408 | Unassigned | Unassigned | Unassigned | 636_0  | Clustered           | 13 VC_636_0  | 13  | 0.6223 | 1          | 0.6223 | 0 | 0 | 0 | 1 Ref      |
| MT446409 | Unassigned | Unassigned | Unassigned | 816_0  | Clustered           | 35 VC_816_0  | 35  | 0.9824 | 1          | 0.9824 | 0 | 0 | 0 | 1 Ref      |
| MT446410 | Unassigned | Unassigned | Unassigned | 837_1  | Clustered           | 24 VC_837_1  | 24  | 0.5328 | 1          | 0.5328 | 0 | 0 | 0 | 1 Ref      |
| MT446411 | Unassigned | Unassigned | Unassigned | 297_0  | Clustered           | 10 VC_297_0  | 10  | 0.0971 | 1          | 0.0971 | 0 | 0 | 0 | 1 Ref      |
| MT446412 | Unassigned | Unassigned | Unassigned | 297_0  | Clustered           | 10 VC_297_0  | 10  | 0.0971 | 1          | 0.0971 | 0 | 0 | 0 | 1 Ref      |
| MT446413 | Unassigned | Unassigned | Unassigned | 837_0  | Clustered           | 12 VC_837_0  | 12  | 0.2327 | 1          | 0.2327 | 0 | 0 | 0 | 1 Ref      |
| MT446414 | Unassigned | Unassigned | Unassigned | 837_0  | Clustered           | 12 VC_837_0  | 12  | 0.2327 | 1          | 0.2327 | 0 | 0 | 0 | 1 Ref      |
| MT446415 | Unassigned | Unassigned | Unassigned | 297_0  | Clustered           | 10 VC_297_0  | 10  | 0.0971 | 1          | 0.0971 | 0 | 0 | 0 | 1 Ref      |
| MT446416 | Unassigned | Unassigned | Unassigned | 170_1  | Clustered/Singleton | 1 VC_170_1   | 1   | 0      | 1          | 0      | 0 | 0 | 0 | 1 Ref      |
| MT446417 | Unassigned | Unassigned | Unassigned | 848_0  | Clustered           | 124 VC_848_0 | 124 | 0.9484 | 1          | 0.9484 | 0 | 0 | 0 | 1 Ref      |
| MT446418 | Unassigned | Unassigned | Unassigned | 848_0  | Clustered           | 124 VC_848_0 | 124 | 0.9484 | 1          | 0.9484 | 0 | 0 | 0 | 1 Ref      |
| MT446419 | Unassigned | Unassigned | Unassigned | 816_0  | Clustered           | 35 VC_816_0  | 35  | 0.9824 | 1          | 0.9824 | 0 | 0 | 0 | 1 Ref      |
| MT446420 | Unassigned | Unassigned | Unassigned | 297_1  | Clustered           | 8 VC_297_1   | 8   | 0.0749 | 1          | 0.0749 | 0 | 0 | 0 | 0.8571 Ref |
| MT446421 | Unassigned | Unassigned | Unassigned | 297_0  | Clustered           | 10 VC_297_0  | 10  | 0.0971 | 1          | 0.0971 | 0 | 0 | 0 | 1 Ref      |
| MT446422 | Unassigned | Unassigned | Unassigned | 297_1  | Clustered           | 8 VC_297_1   | 8   | 0.0749 | 1          | 0.0749 | 0 | 0 | 0 | 0.8571 Ref |
| MT446423 | Unassigned | Unassigned | Unassigned | 293_5  | Clustered/Singleton | 1 VC_293_5   | 1   | 0      | 1          | 0      | 0 | 0 | 0 | 1 Ref      |
| MT448616 | Unassigned | Unassigned | Unassigned | 1007_1 | Clustered           | 24 VC_1007_1 | 24  | 0.7364 | 1          | 0.7364 | 0 | 0 | 0 | 0.8877 Ref |
| MT448617 | Unassigned | Unassigned | Unassigned | 1007_1 | Clustered           | 24 VC_1007_1 | 24  | 0.7364 | 1          | 0.7364 | 0 | 0 | 0 | 0.8877 Ref |
| MT451873 | Unassigned | Unassigned | Unassigned | 935_1  | Clustered           | 4 VC_935_1   | 4   | 0.1471 | 0.99997723 | 0.1471 | 0 | 0 | 0 | 1 Ref      |
| MT451985 | Unassigned | Unassigned | Unassigned | 1296_0 | Clustered           | 82 VC_1296_0 | 82  | 0.7938 | 1          | 0.7938 | 0 | 0 | 0 | 1 Ref      |
| MT457475 | Unassigned | Unassigned | Unassigned | 799_0  | Clustered           | 3 VC_799_0   | 3   | 0.4746 | 0.9961812  | 0.4727 | 0 | 0 | 0 | 1 Ref      |
| MT457552 | Unassigned | Unassigned | Unassigned | 294_0  | Clustered           | 2 VC_294_0   | 2   | 0.0272 | 0.9577281  | 0.0261 | 0 | 0 | 0 | 1 Ref      |
| MT457553 | Unassigned | Unassigned | Unassigned | 294_0  | Clustered           | 2 VC_294_0   | 2   | 0.0272 | 0.9577281  | 0.0261 | 0 | 0 | 0 | 1 Ref      |
| MT459144 | Unassigned | Unassigned | Unassigned | 1007_1 | Clustered           | 24 VC_1007_1 | 24  | 0.7364 | 1          | 0.7364 | 0 | 0 | 0 | 0.8877 Ref |
| MT459794 | Unassigned | Unassigned | Unassigned | 842_0  | Clustered           | 14 VC_842_0  | 14  | 0.6581 | 1          | 0.6581 | 0 | 0 | 0 | 1 Ref      |
| MT460514 | Unassigned | Unassigned | Unassigned | 1007_1 | Clustered           | 24 VC_1007_1 | 24  | 0.7364 | 1          | 0.7364 | 0 | 0 | 0 | 0.8877 Ref |
| MT460515 | Unassigned | Unassigned | Unassigned | 1007_1 | Clustered           | 24 VC_1007_1 | 24  | 0.7364 | 1          | 0.7364 | 0 | 0 | 0 | 0.8877 Ref |
| MT460516 | Unassigned | Unassigned | Unassigned | 1007_1 | Clustered           | 24 VC_1007_1 | 24  | 0.7364 | 1          | 0.7364 | 0 | 0 | 0 | 0.8877 Ref |
| MT460517 | Unassigned | Unassigned | Unassigned | 1007_1 | Clustered           | 24 VC_1007_1 | 24  | 0.7364 | 1          | 0.7364 | 0 | 0 | 0 | 0.8877 Ref |
| MT460518 | Unassigned | Unassigned | Unassigned | 1007_1 | Clustered           | 24 VC_1007_1 | 24  | 0.7364 | 1          | 0.7364 | 0 | 0 | 0 | 0.8877 Ref |
| MT465573 | Unassigned | Unassigned | Unassigned | 407_0  | Clustered           | 2 VC_407_0   | 2   | 0.0209 | 0.95793174 | 0.02   | 0 | 0 | 0 | 1 Ref      |
| MT478991 | Unassigned | Unassigned | Unassigned | 609_0  | Clustered           | 27 VC_609_0  | 27  | 0.9943 | 1          | 0.9943 | 0 | 0 | 0 | 1 Ref      |
| MT478992 | Unassigned | Unassigned | Unassigned | 603_0  | Clustered           | 28 VC_603_0  | 28  | 0.7692 | 1          | 0.7692 | 0 | 0 | 0 | 1 Ref      |
| MT478993 | Unassigned | Unassigned | Unassigned | 859_0  | Clustered           | 67 VC_859_0  | 67  | 0.9622 | 1          | 0.9622 | 0 | 0 | 0 | 1 Ref      |
| MT490303 | Unassigned | Unassigned | Unassigned | 961_0  | Clustered           | 3 VC_961_0   | 3   | 0.783  | 0.9944138  | 0.7786 | 0 | 0 | 0 | 1 Ref      |
| MT490373 | Unassigned | Unassigned | Unassigned | 535_1  | Clustered           | 108 VC_535_1 | 108 | 0.8479 | 1          | 0.8479 | 0 | 0 | 0 | 0.9955 Ref |
| MT491204 | Unassigned | Unassigned | Unassigned | 80_6   | Clustered           | 11 VC_80_6   | 11  | 0.0527 | 1          | 0.0527 | 0 | 0 | 0 | 0.7455 Ref |
| MT491205 | Unassigned | Unassigned | Unassigned | 80_6   | Clustered           | 11 VC_80_6   | 11  | 0.0527 | 1          | 0.0527 | 0 | 0 | 0 | 0.7455 Ref |
| MT491206 | Unassigned | Unassigned | Unassigned | 80_6   | Clustered           | 11 VC_80_6   | 11  | 0.0527 | 1          | 0.0527 | 0 | 0 | 0 | 0.7455 Ref |
| MT491207 | Unassigned | Unassigned | Unassigned | 646_0  | Clustered           | 3 VC_646_0   | 3   | 0.1223 | 0.99819199 | 0.122  | 0 | 0 | 0 | 1 Ref      |
| MT491208 | Unassigned | Unassigned | Unassigned | 646_0  | Clustered           | 3 VC_646_0   | 3   | 0.1223 | 0.99819199 | 0.122  | 0 | 0 | 0 | 1 Ref      |
| MT495635 | Unassigned | Unassigned | Unassigned | 56_0   | Clustered           | 6 VC_56_0    | 6   | 0.6713 | 0.99999999 | 0.6713 | 0 | 0 | 0 | 1 Ref      |
| MT496969 | Unassigned | Unassigned | Unassigned | 465_0  | Clustered           | 80 VC_465_0  | 80  | 0.9988 | 1          | 0.9988 | 0 | 0 | 0 | 1 Ref      |
| MT496970 | Unassigned | Unassigned | Unassigned | 871_1  | Clustered           | 26 VC_871_1  | 26  | 0.6303 | 1          | 0.6303 | 0 | 0 | 0 | 0.9815 Ref |
| MT496971 | Unassigned | Unassigned | Unassigned | 466_0  | Clustered           | 66 VC_466_0  | 66  | 0.9246 | 1          | 0.9246 | 0 | 0 | 0 | 1 Ref      |
| MT497017 | Unassigned | Unassigned | Unassigned | 1051_0 | Clustered           | 62 VC_1051_0 | 62  | 0.9943 | 1          | 0.9943 | 0 | 0 | 0 | 1 Ref      |
| MT497065 | Unassigned | Unassigned | Unassigned | 1051_0 | Clustered           | 62 VC_1051_0 | 62  | 0.9943 | 1          | 0.9943 | 0 | 0 | 0 | 1 Ref      |
| MT497066 | Unassigned | Unassigned | Unassigned | 1051_0 | Clustered           | 62 VC_1051_0 | 62  | 0.9943 | 1          | 0.9943 | 0 | 0 | 0 | 1 Ref      |
| MT497067 | Unassigned | Unassigned | Unassigned | 1051_0 | Clustered           | 62 VC_1051_0 | 62  | 0.9943 | 1          | 0.9943 | 0 | 0 | 0 | 1 Ref      |
| MT497068 | Unassigned | Unassigned | Unassigned | 1051_0 | Clustered           | 62 VC_1051_0 | 62  | 0.9943 | 1          | 0.9943 | 0 | 0 | 0 | 1 Ref      |



[illegible]



|          |            |            |            |         |                     |               |     |        |             |        |   |   |   |        |     |
|----------|------------|------------|------------|---------|---------------------|---------------|-----|--------|-------------|--------|---|---|---|--------|-----|
| MT497248 | Unassigned | Unassigned | Unassigned | 1462_0  | Clustered           | 110 VC_1462_0 | 110 | 1      | 1           | 1      | 0 | 0 | 0 | 0.9746 | Ref |
| MT497249 | Unassigned | Unassigned | Unassigned | 1462_0  | Clustered           | 110 VC_1462_0 | 110 | 1      | 1           | 1      | 0 | 0 | 0 | 0.9746 | Ref |
| MT497250 | Unassigned | Unassigned | Unassigned | 1462_0  | Clustered           | 110 VC_1462_0 | 110 | 1      | 1           | 1      | 0 | 0 | 0 | 0.9746 | Ref |
| MT497251 | Unassigned | Unassigned | Unassigned | 1462_0  | Clustered           | 110 VC_1462_0 | 110 | 1      | 1           | 1      | 0 | 0 | 0 | 0.9746 | Ref |
| MT497252 | Unassigned | Unassigned | Unassigned | 1462_0  | Clustered           | 110 VC_1462_0 | 110 | 1      | 1           | 1      | 0 | 0 | 0 | 0.9746 | Ref |
| MT497253 | Unassigned | Unassigned | Unassigned | 1462_0  | Clustered           | 110 VC_1462_0 | 110 | 1      | 1           | 1      | 0 | 0 | 0 | 0.9746 | Ref |
| MT497254 | Unassigned | Unassigned | Unassigned | 1462_0  | Clustered           | 110 VC_1462_0 | 110 | 1      | 1           | 1      | 0 | 0 | 0 | 0.9746 | Ref |
| MT497255 | Unassigned | Unassigned | Unassigned | 1462_0  | Clustered           | 110 VC_1462_0 | 110 | 1      | 1           | 1      | 0 | 0 | 0 | 0.9746 | Ref |
| MT497256 | Unassigned | Unassigned | Unassigned | 1462_0  | Clustered           | 110 VC_1462_0 | 110 | 1      | 1           | 1      | 0 | 0 | 0 | 0.9746 | Ref |
| MT497257 | Unassigned | Unassigned | Unassigned | 1462_0  | Clustered           | 110 VC_1462_0 | 110 | 1      | 1           | 1      | 0 | 0 | 0 | 0.9746 | Ref |
| MT497258 | Unassigned | Unassigned | Unassigned | 1462_0  | Clustered           | 110 VC_1462_0 | 110 | 1      | 1           | 1      | 0 | 0 | 0 | 0.9746 | Ref |
| MT497259 | Unassigned | Unassigned | Unassigned | 1462_0  | Clustered           | 110 VC_1462_0 | 110 | 1      | 1           | 1      | 0 | 0 | 0 | 0.9746 | Ref |
| MT497260 | Unassigned | Unassigned | Unassigned | 1462_0  | Clustered           | 110 VC_1462_0 | 110 | 1      | 1           | 1      | 0 | 0 | 0 | 0.9746 | Ref |
| MT497261 | Unassigned | Unassigned | Unassigned | 1462_0  | Clustered           | 110 VC_1462_0 | 110 | 1      | 1           | 1      | 0 | 0 | 0 | 0.9746 | Ref |
| MT497262 | Unassigned | Unassigned | Unassigned | 1462_0  | Clustered           | 110 VC_1462_0 | 110 | 1      | 1           | 1      | 0 | 0 | 0 | 0.9746 | Ref |
| MT497263 | Unassigned | Unassigned | Unassigned | 1462_0  | Clustered           | 110 VC_1462_0 | 110 | 1      | 1           | 1      | 0 | 0 | 0 | 0.9746 | Ref |
| MT497264 | Unassigned | Unassigned | Unassigned | 1462_0  | Clustered           | 110 VC_1462_0 | 110 | 1      | 1           | 1      | 0 | 0 | 0 | 0.9746 | Ref |
| MT497265 | Unassigned | Unassigned | Unassigned | 1462_0  | Clustered           | 110 VC_1462_0 | 110 | 1      | 1           | 1      | 0 | 0 | 0 | 0.9746 | Ref |
| MT497266 | Unassigned | Unassigned | Unassigned | 1462_0  | Clustered           | 110 VC_1462_0 | 110 | 1      | 1           | 1      | 0 | 0 | 0 | 0.9746 | Ref |
| MT497267 | Unassigned | Unassigned | Unassigned | 1462_0  | Clustered           | 110 VC_1462_0 | 110 | 1      | 1           | 1      | 0 | 0 | 0 | 0.9746 | Ref |
| MT497268 | Unassigned | Unassigned | Unassigned | 1462_0  | Clustered           | 110 VC_1462_0 | 110 | 1      | 1           | 1      | 0 | 0 | 0 | 0.9746 | Ref |
| MT497269 | Unassigned | Unassigned | Unassigned | 1462_0  | Clustered           | 110 VC_1462_0 | 110 | 1      | 1           | 1      | 0 | 0 | 0 | 0.9746 | Ref |
| MT497270 | Unassigned | Unassigned | Unassigned | 1462_0  | Clustered           | 110 VC_1462_0 | 110 | 1      | 1           | 1      | 0 | 0 | 0 | 0.9746 | Ref |
| MT497271 | Unassigned | Unassigned | Unassigned | 1462_0  | Clustered           | 110 VC_1462_0 | 110 | 1      | 1           | 1      | 0 | 0 | 0 | 0.9746 | Ref |
| MT497272 | Unassigned | Unassigned | Unassigned | 1462_0  | Clustered           | 110 VC_1462_0 | 110 | 1      | 1           | 1      | 0 | 0 | 0 | 0.9746 | Ref |
| MT497273 | Unassigned | Unassigned | Unassigned | 1462_0  | Clustered           | 110 VC_1462_0 | 110 | 1      | 1           | 1      | 0 | 0 | 0 | 0.9746 | Ref |
| MT497274 | Unassigned | Unassigned | Unassigned | 1462_0  | Clustered           | 110 VC_1462_0 | 110 | 1      | 1           | 1      | 0 | 0 | 0 | 0.9746 | Ref |
| MT497275 | Unassigned | Unassigned | Unassigned | 1462_0  | Clustered           | 110 VC_1462_0 | 110 | 1      | 1           | 1      | 0 | 0 | 0 | 0.9746 | Ref |
| MT497276 | Unassigned | Unassigned | Unassigned | 1462_0  | Clustered           | 110 VC_1462_0 | 110 | 1      | 1           | 1      | 0 | 0 | 0 | 0.9746 | Ref |
| MT497277 | Unassigned | Unassigned | Unassigned | 1462_0  | Clustered           | 110 VC_1462_0 | 110 | 1      | 1           | 1      | 0 | 0 | 0 | 0.9746 | Ref |
| MT497278 | Unassigned | Unassigned | Unassigned | 1462_0  | Clustered           | 110 VC_1462_0 | 110 | 1      | 1           | 1      | 0 | 0 | 0 | 0.9746 | Ref |
| MT497279 | Unassigned | Unassigned | Unassigned | 1462_0  | Clustered           | 110 VC_1462_0 | 110 | 1      | 1           | 1      | 0 | 0 | 0 | 0.9746 | Ref |
| MT498035 | Unassigned | Unassigned | Unassigned | 1136_0  | Clustered           | 40 VC_1136_0  | 40  | 0.8746 | 1           | 0.8746 | 0 | 0 | 0 | 1      | Ref |
| MT498036 | Unassigned | Unassigned | Unassigned | 1138_0  | Clustered           | 16 VC_1138_0  | 16  | 0.4566 | 1           | 0.4566 | 0 | 0 | 0 | 1      | Ref |
| MT498037 | Unassigned | Unassigned | Unassigned | 885_0   | Clustered           | 9 VC_885_0    | 9   | 0.9403 | 1           | 0.9403 | 0 | 0 | 0 | 1      | Ref |
| MT498038 | Unassigned | Unassigned | Unassigned | 1407_0  | Clustered           | 78 VC_1407_0  | 78  | 0.9731 | 1           | 0.9731 | 0 | 0 | 0 | 1      | Ref |
| MT498039 | Unassigned | Unassigned | Unassigned | 898_1   | Clustered           | 27 VC_898_1   | 27  | 0.8894 | 1           | 0.8894 | 0 | 0 | 0 | 1      | Ref |
| MT498040 | Unassigned | Unassigned | Unassigned | 1407_0  | Clustered           | 78 VC_1407_0  | 78  | 0.9731 | 1           | 0.9731 | 0 | 0 | 0 | 1      | Ref |
| MT498041 | Unassigned | Unassigned | Unassigned | 223_6   | Clustered           | 42 VC_223_6   | 42  | 0.4717 | 1           | 0.4717 | 0 | 0 | 0 | 0.8351 | Ref |
| MT498042 | Unassigned | Unassigned | Unassigned | 539_0   | Clustered           | 37 VC_539_0   | 37  | 0.911  | 1           | 0.911  | 0 | 0 | 0 | 1      | Ref |
| MT498044 | Unassigned | Unassigned | Unassigned | 539_0   | Clustered           | 37 VC_539_0   | 37  | 0.911  | 1           | 0.911  | 0 | 0 | 0 | 1      | Ref |
| MT498045 | Unassigned | Unassigned | Unassigned | 1200_0  | Clustered           | 73 VC_1200_0  | 73  | 0.9825 | 1           | 0.9825 | 0 | 0 | 0 | 1      | Ref |
| MT498046 | Unassigned | Unassigned | Unassigned | 1407_0  | Clustered           | 78 VC_1407_0  | 78  | 0.9731 | 1           | 0.9731 | 0 | 0 | 0 | 1      | Ref |
| MT498047 | Unassigned | Unassigned | Unassigned | 1407_0  | Clustered           | 78 VC_1407_0  | 78  | 0.9731 | 1           | 0.9731 | 0 | 0 | 0 | 1      | Ref |
| MT498048 | Unassigned | Unassigned | Unassigned | 539_0   | Clustered           | 37 VC_539_0   | 37  | 0.911  | 1           | 0.911  | 0 | 0 | 0 | 1      | Ref |
| MT498049 | Unassigned | Unassigned | Unassigned | 1296_0  | Clustered           | 82 VC_1296_0  | 82  | 0.7938 | 1           | 0.7938 | 0 | 0 | 0 | 1      | Ref |
| MT498050 | Unassigned | Unassigned | Unassigned | 1200_0  | Clustered           | 73 VC_1200_0  | 73  | 0.9825 | 1           | 0.9825 | 0 | 0 | 0 | 1      | Ref |
| MT498051 | Unassigned | Unassigned | Unassigned | 1407_0  | Clustered           | 78 VC_1407_0  | 78  | 0.9731 | 1           | 0.9731 | 0 | 0 | 0 | 1      | Ref |
| MT498052 | Unassigned | Unassigned | Unassigned | 898_1   | Clustered           | 27 VC_898_1   | 27  | 0.8894 | 1           | 0.8894 | 0 | 0 | 0 | 1      | Ref |
| MT498053 | Unassigned | Unassigned | Unassigned | 885_0   | Clustered           | 9 VC_885_0    | 9   | 0.9403 | 1           | 0.9403 | 0 | 0 | 0 | 1      | Ref |
| MT498054 | Unassigned | Unassigned | Unassigned | 1223_1  | Clustered           | 10 VC_1223_1  | 10  | 0.5795 | 1           | 0.5795 | 0 | 0 | 0 | 1      | Ref |
| MT498055 | Unassigned | Unassigned | Unassigned | 1118_0  | Clustered           | 4 VC_1118_0   | 4   | 0.1491 | 0.999998427 | 0.1491 | 0 | 0 | 0 | 1      | Ref |
| MT498056 | Unassigned | Unassigned | Unassigned | 535_1   | Clustered           | 108 VC_535_1  | 108 | 0.8479 | 1           | 0.8479 | 0 | 0 | 0 | 0.9955 | Ref |
| MT498057 | Unassigned | Unassigned | Unassigned | 1202_0  | Clustered           | 10 VC_1202_0  | 10  | 0.5679 | 1           | 0.5679 | 0 | 0 | 0 | 1      | Ref |
| MT498059 | Unassigned | Unassigned | Unassigned | 1218_0  | Clustered           | 14 VC_1218_0  | 14  | 0.7811 | 1           | 0.7811 | 0 | 0 | 0 | 0.989  | Ref |
| MT498060 | Unassigned | Unassigned | Unassigned | 223_6   | Clustered           | 42 VC_223_6   | 42  | 0.4717 | 1           | 0.4717 | 0 | 0 | 0 | 0.8351 | Ref |
| MT498061 | Unassigned | Unassigned | Unassigned | 537_0   | Clustered           | 39 VC_537_0   | 39  | 0.8148 | 1           | 0.8148 | 0 | 0 | 0 | 1      | Ref |
| MT498064 | Unassigned | Unassigned | Unassigned | 1424_0  | Clustered           | 31 VC_1424_0  | 31  | 0.8834 | 1           | 0.8834 | 0 | 0 | 0 | 1      | Ref |
| MT498065 | Unassigned | Unassigned | Unassigned | 1407_0  | Clustered           | 78 VC_1407_0  | 78  | 0.9731 | 1           | 0.9731 | 0 | 0 | 0 | 1      | Ref |
| MT498066 | Unassigned | Unassigned | Unassigned | 223_6   | Clustered           | 42 VC_223_6   | 42  | 0.4717 | 1           | 0.4717 | 0 | 0 | 0 | 0.8351 | Ref |
| MT498067 | Unassigned | Unassigned | Unassigned | 1407_0  | Clustered           | 78 VC_1407_0  | 78  | 0.9731 | 1           | 0.9731 | 0 | 0 | 0 | 1      | Ref |
| MT499896 | Unassigned | Unassigned | Unassigned | 135_33  | Clustered/Singleton | 1 VC_135_33   | 1   | 0      | 1           | 0      | 0 | 0 | 0 | 1      | Ref |
| MT499897 | Unassigned | Unassigned | Unassigned | 611_0   | Clustered           | 50 VC_611_0   | 50  | 0.7306 | 1           | 0.7306 | 0 | 0 | 0 | 1      | Ref |
| MT499898 | Unassigned | Unassigned | Unassigned | 611_0   | Clustered           | 50 VC_611_0   | 50  | 0.7306 | 1           | 0.7306 | 0 | 0 | 0 | 1      | Ref |
| MT500540 | Unassigned | Unassigned | Unassigned | 393_0   | Clustered           | 5 VC_393_0    | 5   | 0.4703 | 0.99999992  | 0.4703 | 0 | 0 | 0 | 0.9    | Ref |
| MT501516 | Unassigned | Unassigned | Unassigned | 861_0   | Clustered           | 29 VC_861_0   | 29  | 0.9954 | 1           | 0.9954 | 0 | 0 | 0 | 1      | Ref |
| MT511058 | Unassigned | Unassigned | Unassigned | 470_0   | Clustered           | 62 VC_470_0   | 62  | 0.902  | 1           | 0.902  | 0 | 0 | 0 | 1      | Ref |
| MT514532 | Unassigned | Unassigned | Unassigned | 102_0   | Clustered           | 15 VC_102_0   | 15  | 0.653  | 1           | 0.653  | 0 | 0 | 0 | 1      | Ref |
| MT515751 | Unassigned | Unassigned | Unassigned | 290_34  | Clustered           | 4 VC_290_34   | 4   | 0.0081 | 0.9997166   | 0.0081 | 0 | 0 | 0 | 1      | Ref |
| MT515752 | Unassigned | Unassigned | Unassigned | 290_100 | Clustered           | 2 VC_290_100  | 2   | 0.0026 | 0.90579888  | 0.0024 | 0 | 0 | 0 | 1      | Ref |
| MT515753 | Unassigned | Unassigned | Unassigned | 290_136 | Clustered           | 2 VC_290_136  | 2   | 0.0026 | 0.93878877  | 0.0024 | 0 | 0 | 0 | 1      | Ref |
| MT515754 | Unassigned | Unassigned | Unassigned | 290_67  | Clustered           | 2 VC_290_67   | 2   | 0.0027 | 0.90726003  | 0.0025 | 0 | 0 | 0 | 1      | Ref |
| MT515755 | Unassigned | Unassigned | Unassigned | 290_136 | Clustered           | 2 VC_290_136  | 2   | 0.0026 | 0.93878877  | 0.0024 | 0 | 0 | 0 | 1      | Ref |
| MT515756 | Unassigned | Unassigned | Unassigned | 290_180 | Clustered/Singleton | 1 VC_290_180  | 1   | 0      | 1           | 0      | 0 | 0 | 0 | 1      | Ref |
| MT515757 | Unassigned | Unassigned | Unassigned | 399_0   | Clustered           | 49 VC_399_0   | 49  | 0.7927 | 1           | 0.7927 | 0 | 0 | 0 | 1      | Ref |
| MT520979 | Unassigned | Unassigned | Unassigned | 711_0   | Clustered           | 48 VC_711_0   | 48  | 0.8217 | 1           | 0.8217 | 0 | 0 | 0 | 1      | Ref |
| MT521990 | Unassigned | Unassigned | Unassigned | 1407_0  | Clustered           | 78 VC_1407_0  | 78  | 0.9731 | 1           | 0.9731 | 0 | 0 | 0 | 1      | Ref |
| MT521994 | Unassigned | Unassigned | Unassigned | 898_1   | Clustered           | 27 VC_898_1   | 27  | 0.8894 | 1           | 0.8894 | 0 | 0 | 0 | 1      | Ref |
| MT521995 | Unassigned | Unassigned | Unassigned | 540_1   | Clustered           | 5 VC_540_1    | 5   | 0.1012 | 0.99999997  | 0.1012 | 0 | 0 | 0 | 0.8    | Ref |
| MT521996 | Unassigned | Unassigned | Unassigned | 587_0   | Clustered           | 8 VC_587_0    | 8   | 0.4907 | 1           | 0.4907 | 0 | 0 | 0 | 1      | Ref |
| MT521997 | Unassigned | Unassigned | Unassigned | 423_0   | Clustered           | 7 VC_423_0    | 7   | 0.7874 | 1           | 0.7874 | 0 | 0 | 0 | 1      | Ref |



|          |            |            |            |         |                     |              |     |        |            |        |   |   |   |            |
|----------|------------|------------|------------|---------|---------------------|--------------|-----|--------|------------|--------|---|---|---|------------|
| MT521998 | Unassigned | Unassigned | Unassigned | 1219_0  | Clustered           | 24 VC_1219_0 | 24  | 0.9519 | 1          | 0.9519 | 0 | 0 | 0 | 1 Ref      |
| MT521999 | Unassigned | Unassigned | Unassigned | 701_0   | Clustered           | 16 VC_701_0  | 16  | 0.2957 | 1          | 0.2957 | 0 | 0 | 0 | 0.9167 Ref |
| MT522001 | Unassigned | Unassigned | Unassigned | 1406_0  | Clustered           | 21 VC_1406_0 | 21  | 0.9836 | 1          | 0.9836 | 0 | 0 | 0 | 1 Ref      |
| MT522002 | Unassigned | Unassigned | Unassigned | 533_0   | Clustered           | 16 VC_533_0  | 16  | 0.3765 | 1          | 0.3765 | 0 | 0 | 0 | 1 Ref      |
| MT522003 | Unassigned | Unassigned | Unassigned | 1406_0  | Clustered           | 21 VC_1406_0 | 21  | 0.9836 | 1          | 0.9836 | 0 | 0 | 0 | 1 Ref      |
| MT522004 | Unassigned | Unassigned | Unassigned | 227_0   | Clustered           | 4 VC_227_0   | 4   | 0.0609 | 0.99998808 | 0.0609 | 0 | 0 | 0 | 1 Ref      |
| MT522005 | Unassigned | Unassigned | Unassigned | 571_8   | Clustered           | 19 VC_571_8  | 19  | 0.1031 | 1          | 0.1031 | 0 | 0 | 0 | 0.8713 Ref |
| MT522006 | Unassigned | Unassigned | Unassigned | 1218_0  | Clustered           | 14 VC_1218_0 | 14  | 0.7811 | 1          | 0.7811 | 0 | 0 | 0 | 0.989 Ref  |
| MT522007 | Unassigned | Unassigned | Unassigned | 231_0   | Clustered           | 19 VC_231_0  | 19  | 0.9378 | 1          | 0.9378 | 0 | 0 | 0 | 1 Ref      |
| MT526905 | Unassigned | Unassigned | Unassigned | 290_100 | Clustered           | 2 VC_290_100 | 2   | 0.0026 | 0.90579888 | 0.0024 | 0 | 0 | 0 | 1 Ref      |
| MT533174 | Unassigned | Unassigned | Unassigned | 297_1   | Clustered           | 8 VC_297_1   | 8   | 0.0749 | 1          | 0.0749 | 0 | 0 | 0 | 0.8571 Ref |
| MT536174 | Unassigned | Unassigned | Unassigned | 483_0   | Clustered           | 2 VC_483_0   | 2   | 0.1472 | 0.95658144 | 0.1408 | 0 | 0 | 0 | 1 Ref      |
| MT542512 | Unassigned | Unassigned | Unassigned | 399_0   | Clustered           | 49 VC_399_0  | 49  | 0.7927 | 1          | 0.7927 | 0 | 0 | 0 | 1 Ref      |
| MT542697 | Unassigned | Unassigned | Unassigned | 848_0   | Clustered           | 124 VC_848_0 | 124 | 0.9484 | 1          | 0.9484 | 0 | 0 | 0 | 1 Ref      |
| MT543041 | Unassigned | Unassigned | Unassigned | 405_0   | Clustered           | 126 VC_405_0 | 126 | 0.9614 | 1          | 0.9614 | 0 | 0 | 0 | 1 Ref      |
| MT552976 | Unassigned | Unassigned | Unassigned | 873_4   | Clustered           | 2 VC_873_4   | 2   | 0.0238 | 0.86607125 | 0.0206 | 0 | 0 | 0 | 1 Ref      |
| MT553335 | Unassigned | Unassigned | Unassigned | 579_1   | Clustered           | 2 VC_579_1   | 2   | 0.0032 | 0.75989446 | 0.0024 | 0 | 0 | 0 | 0 Ref      |
| MT553336 | Unassigned | Unassigned | Unassigned | 1217_0  | Clustered           | 41 VC_1217_0 | 41  | 0.9546 | 1          | 0.9546 | 0 | 0 | 0 | 0.9976 Ref |
| MT553337 | Unassigned | Unassigned | Unassigned | 226_0   | Clustered           | 5 VC_226_0   | 5   | 0.0793 | 0.99999998 | 0.0793 | 0 | 0 | 0 | 1 Ref      |
| MT553338 | Unassigned | Unassigned | Unassigned | 535_1   | Clustered           | 108 VC_535_1 | 108 | 0.8479 | 1          | 0.8479 | 0 | 0 | 0 | 0.9955 Ref |
| MT553339 | Unassigned | Unassigned | Unassigned | 1296_0  | Clustered           | 82 VC_1296_0 | 82  | 0.7938 | 1          | 0.7938 | 0 | 0 | 0 | 1 Ref      |
| MT553340 | Unassigned | Unassigned | Unassigned | 1203_0  | Clustered           | 28 VC_1203_0 | 28  | 0.4905 | 1          | 0.4905 | 0 | 0 | 0 | 1 Ref      |
| MT553341 | Unassigned | Unassigned | Unassigned | 1296_0  | Clustered           | 82 VC_1296_0 | 82  | 0.7938 | 1          | 0.7938 | 0 | 0 | 0 | 1 Ref      |
| MT553343 | Unassigned | Unassigned | Unassigned | 1296_0  | Clustered           | 82 VC_1296_0 | 82  | 0.7938 | 1          | 0.7938 | 0 | 0 | 0 | 1 Ref      |
| MT553344 | Unassigned | Unassigned | Unassigned | 419_0   | Clustered           | 11 VC_419_0  | 11  | 0.9465 | 1          | 0.9465 | 0 | 0 | 0 | 1 Ref      |
| MT553345 | Unassigned | Unassigned | Unassigned | 538_40  | Clustered           | 4 VC_538_40  | 4   | 0.0395 | 0.99998776 | 0.0394 | 0 | 0 | 0 | 1 Ref      |
| MT553346 | Unassigned | Unassigned | Unassigned | 535_1   | Clustered           | 108 VC_535_1 | 108 | 0.8479 | 1          | 0.8479 | 0 | 0 | 0 | 0.9955 Ref |
| MT554104 | Unassigned | Unassigned | Unassigned | 155_18  | Clustered/Singleton | 1 VC_155_18  | 1   | 0      | 1          | 0      | 0 | 0 | 0 | 1 Ref      |
| MT559526 | Unassigned | Unassigned | Unassigned | 113_0   | Clustered           | 91 VC_113_0  | 91  | 0.9584 | 1          | 0.9584 | 0 | 0 | 0 | 1 Ref      |
| MT559527 | Unassigned | Unassigned | Unassigned | 113_0   | Clustered           | 91 VC_113_0  | 91  | 0.9584 | 1          | 0.9584 | 0 | 0 | 0 | 1 Ref      |
| MT559528 | Unassigned | Unassigned | Unassigned | 125_0   | Clustered           | 23 VC_125_0  | 23  | 0.8163 | 1          | 0.8163 | 0 | 0 | 0 | 1 Ref      |
| MT560058 | Unassigned | Unassigned | Unassigned | 687_5   | Clustered/Singleton | 1 VC_687_5   | 1   | 0      | 1          | 0      | 0 | 0 | 0 | 1 Ref      |
| MT560059 | Unassigned | Unassigned | Unassigned | 873_4   | Clustered           | 2 VC_873_4   | 2   | 0.0238 | 0.86607125 | 0.0206 | 0 | 0 | 0 | 1 Ref      |
| MT577844 | Unassigned | Unassigned | Unassigned | 198_4   | Clustered/Singleton | 1 VC_198_4   | 1   | 0      | 1          | 0      | 0 | 0 | 0 | 1 Ref      |
| MT580116 | Unassigned | Unassigned | Unassigned | 492_0   | Clustered           | 20 VC_492_0  | 20  | 0.7887 | 1          | 0.7887 | 0 | 0 | 0 | 1 Ref      |
| MT580117 | Unassigned | Unassigned | Unassigned | 492_0   | Clustered           | 20 VC_492_0  | 20  | 0.7887 | 1          | 0.7887 | 0 | 0 | 0 | 1 Ref      |
| MT580897 | Unassigned | Unassigned | Unassigned | 509_0   | Clustered           | 36 VC_509_0  | 36  | 0.5291 | 1          | 0.5291 | 0 | 0 | 0 | 0.9714 Ref |
| MT584805 | Unassigned | Unassigned | Unassigned | 913_0   | Clustered           | 28 VC_913_0  | 28  | 0.6206 | 1          | 0.6206 | 0 | 0 | 0 | 0.9841 Ref |
| MT585273 | Unassigned | Unassigned | Unassigned | 944_0   | Clustered           | 76 VC_944_0  | 76  | 0.9789 | 1          | 0.9789 | 0 | 0 | 0 | 1 Ref      |
| MT585274 | Unassigned | Unassigned | Unassigned | 944_0   | Clustered           | 76 VC_944_0  | 76  | 0.9789 | 1          | 0.9789 | 0 | 0 | 0 | 1 Ref      |
| MT585275 | Unassigned | Unassigned | Unassigned | 944_0   | Clustered           | 76 VC_944_0  | 76  | 0.9789 | 1          | 0.9789 | 0 | 0 | 0 | 1 Ref      |
| MT585276 | Unassigned | Unassigned | Unassigned | 944_0   | Clustered           | 76 VC_944_0  | 76  | 0.9789 | 1          | 0.9789 | 0 | 0 | 0 | 1 Ref      |
| MT585277 | Unassigned | Unassigned | Unassigned | 944_0   | Clustered           | 76 VC_944_0  | 76  | 0.9789 | 1          | 0.9789 | 0 | 0 | 0 | 1 Ref      |
| MT585278 | Unassigned | Unassigned | Unassigned | 944_0   | Clustered           | 76 VC_944_0  | 76  | 0.9789 | 1          | 0.9789 | 0 | 0 | 0 | 1 Ref      |
| MT585279 | Unassigned | Unassigned | Unassigned | 944_0   | Clustered           | 76 VC_944_0  | 76  | 0.9789 | 1          | 0.9789 | 0 | 0 | 0 | 1 Ref      |
| MT585280 | Unassigned | Unassigned | Unassigned | 944_0   | Clustered           | 76 VC_944_0  | 76  | 0.9789 | 1          | 0.9789 | 0 | 0 | 0 | 1 Ref      |
| MT585281 | Unassigned | Unassigned | Unassigned | 944_0   | Clustered           | 76 VC_944_0  | 76  | 0.9789 | 1          | 0.9789 | 0 | 0 | 0 | 1 Ref      |
| MT585282 | Unassigned | Unassigned | Unassigned | 944_0   | Clustered           | 76 VC_944_0  | 76  | 0.9789 | 1          | 0.9789 | 0 | 0 | 0 | 1 Ref      |
| MT585283 | Unassigned | Unassigned | Unassigned | 944_0   | Clustered           | 76 VC_944_0  | 76  | 0.9789 | 1          | 0.9789 | 0 | 0 | 0 | 1 Ref      |
| MT585284 | Unassigned | Unassigned | Unassigned | 944_0   | Clustered           | 76 VC_944_0  | 76  | 0.9789 | 1          | 0.9789 | 0 | 0 | 0 | 1 Ref      |
| MT585285 | Unassigned | Unassigned | Unassigned | 944_0   | Clustered           | 76 VC_944_0  | 76  | 0.9789 | 1          | 0.9789 | 0 | 0 | 0 | 1 Ref      |
| MT585286 | Unassigned | Unassigned | Unassigned | 944_0   | Clustered           | 76 VC_944_0  | 76  | 0.9789 | 1          | 0.9789 | 0 | 0 | 0 | 1 Ref      |
| MT585287 | Unassigned | Unassigned | Unassigned | 944_0   | Clustered           | 76 VC_944_0  | 76  | 0.9789 | 1          | 0.9789 | 0 | 0 | 0 | 1 Ref      |
| MT585288 | Unassigned | Unassigned | Unassigned | 944_0   | Clustered           | 76 VC_944_0  | 76  | 0.9789 | 1          | 0.9789 | 0 | 0 | 0 | 1 Ref      |
| MT585289 | Unassigned | Unassigned | Unassigned | 944_0   | Clustered           | 76 VC_944_0  | 76  | 0.9789 | 1          | 0.9789 | 0 | 0 | 0 | 1 Ref      |
| MT585290 | Unassigned | Unassigned | Unassigned | 944_0   | Clustered           | 76 VC_944_0  | 76  | 0.9789 | 1          | 0.9789 | 0 | 0 | 0 | 1 Ref      |
| MT585291 | Unassigned | Unassigned | Unassigned | 944_0   | Clustered           | 76 VC_944_0  | 76  | 0.9789 | 1          | 0.9789 | 0 | 0 | 0 | 1 Ref      |
| MT585292 | Unassigned | Unassigned | Unassigned | 944_0   | Clustered           | 76 VC_944_0  | 76  | 0.9789 | 1          | 0.9789 | 0 | 0 | 0 | 1 Ref      |
| MT585293 | Unassigned | Unassigned | Unassigned | 944_0   | Clustered           | 76 VC_944_0  | 76  | 0.9789 | 1          | 0.9789 | 0 | 0 | 0 | 1 Ref      |
| MT585294 | Unassigned | Unassigned | Unassigned | 944_0   | Clustered           | 76 VC_944_0  | 76  | 0.9789 | 1          | 0.9789 | 0 | 0 | 0 | 1 Ref      |
| MT585295 | Unassigned | Unassigned | Unassigned | 944_0   | Clustered           | 76 VC_944_0  | 76  | 0.9789 | 1          | 0.9789 | 0 | 0 | 0 | 1 Ref      |
| MT585296 | Unassigned | Unassigned | Unassigned | 944_0   | Clustered           | 76 VC_944_0  | 76  | 0.9789 | 1          | 0.9789 | 0 | 0 | 0 | 1 Ref      |
| MT585297 | Unassigned | Unassigned | Unassigned | 944_0   | Clustered           | 76 VC_944_0  | 76  | 0.9789 | 1          | 0.9789 | 0 | 0 | 0 | 1 Ref      |
| MT585298 | Unassigned | Unassigned | Unassigned | 944_0   | Clustered           | 76 VC_944_0  | 76  | 0.9789 | 1          | 0.9789 | 0 | 0 | 0 | 1 Ref      |
| MT585299 | Unassigned | Unassigned | Unassigned | 944_0   | Clustered           | 76 VC_944_0  | 76  | 0.9789 | 1          | 0.9789 | 0 | 0 | 0 | 1 Ref      |
| MT585300 | Unassigned | Unassigned | Unassigned | 944_0   | Clustered           | 76 VC_944_0  | 76  | 0.9789 | 1          | 0.9789 | 0 | 0 | 0 | 1 Ref      |
| MT585301 | Unassigned | Unassigned | Unassigned | 944_0   | Clustered           | 76 VC_944_0  | 76  | 0.9789 | 1          | 0.9789 | 0 | 0 | 0 | 1 Ref      |
| MT585302 | Unassigned | Unassigned | Unassigned | 944_0   | Clustered           | 76 VC_944_0  | 76  | 0.9789 | 1          | 0.9789 | 0 | 0 | 0 | 1 Ref      |
| MT585303 | Unassigned | Unassigned | Unassigned | 944_0   | Clustered           | 76 VC_944_0  | 76  | 0.9789 | 1          | 0.9789 | 0 | 0 | 0 | 1 Ref      |
| MT585304 | Unassigned | Unassigned | Unassigned | 944_0   | Clustered           | 76 VC_944_0  | 76  | 0.9789 | 1          | 0.9789 | 0 | 0 | 0 | 1 Ref      |
| MT585305 | Unassigned | Unassigned | Unassigned | 944_0   | Clustered           | 76 VC_944_0  | 76  | 0.9789 | 1          | 0.9789 | 0 | 0 | 0 | 1 Ref      |
| MT585306 | Unassigned | Unassigned | Unassigned | 944_0   | Clustered           | 76 VC_944_0  | 76  | 0.9789 | 1          | 0.9789 | 0 | 0 | 0 | 1 Ref      |
| MT585307 | Unassigned | Unassigned | Unassigned | 944_0   | Clustered           | 76 VC_944_0  | 76  | 0.9789 | 1          | 0.9789 | 0 | 0 | 0 | 1 Ref      |
| MT585308 | Unassigned | Unassigned | Unassigned | 944_0   | Clustered           | 76 VC_944_0  | 76  | 0.9789 | 1          | 0.9789 | 0 | 0 | 0 | 1 Ref      |
| MT585309 | Unassigned | Unassigned | Unassigned | 944_0   | Clustered           | 76 VC_944_0  | 76  | 0.9789 | 1          | 0.9789 | 0 | 0 | 0 | 1 Ref      |
| MT585310 | Unassigned | Unassigned | Unassigned | 944_0   | Clustered           | 76 VC_944_0  | 76  | 0.9789 | 1          | 0.9789 | 0 | 0 | 0 | 1 Ref      |
| MT585311 | Unassigned | Unassigned | Unassigned | 944_0   | Clustered           | 76 VC_944_0  | 76  | 0.9789 | 1          | 0.9789 | 0 | 0 | 0 | 1 Ref      |
| MT585312 | Unassigned | Unassigned | Unassigned | 944_0   | Clustered           | 76 VC_944_0  | 76  | 0.9789 | 1          | 0.9789 | 0 | 0 | 0 | 1 Ref      |
| MT585313 | Unassigned | Unassigned | Unassigned | 944_0   | Clustered           | 76 VC_944_0  | 76  | 0.9789 | 1          | 0.9789 | 0 | 0 | 0 | 1 Ref      |
| MT585314 | Unassigned | Unassigned | Unassigned | 944_0   | Clustered           | 76 VC_944_0  | 76  | 0.9789 | 1          | 0.9789 | 0 | 0 | 0 | 1 Ref      |
| MT585315 | Unassigned | Unassigned | Unassigned | 944_0   | Clustered           | 76 VC_944_0  | 76  | 0.9789 | 1          | 0.9789 | 0 | 0 | 0 | 1 Ref      |



|          |            |            |            |         |                     |              |     |        |            |        |   |   |   |            |
|----------|------------|------------|------------|---------|---------------------|--------------|-----|--------|------------|--------|---|---|---|------------|
| MT586120 | Unassigned | Unassigned | Unassigned | 676_0   | Clustered           | 3 VC_676_0   | 3   | 0.0217 | 0.92459149 | 0.0201 | 0 | 0 | 0 | 1 Ref      |
| MT588083 | Unassigned | Unassigned | Unassigned | 654_0   | Clustered           | 115 VC_654_0 | 115 | 0.7303 | 1          | 0.7303 | 0 | 0 | 0 | 0.8764 Ref |
| MT591577 | Unassigned | Unassigned | Unassigned | 52_0    | Clustered           | 9 VC_52_0    | 9   | 0.5586 | 1          | 0.5586 | 0 | 0 | 0 | 1 Ref      |
| MT596499 | Unassigned | Unassigned | Unassigned | 685_0   | Clustered           | 7 VC_685_0   | 7   | 0.4045 | 1          | 0.4045 | 0 | 0 | 0 | 1 Ref      |
| MT596501 | Unassigned | Unassigned | Unassigned | 156_0   | Clustered           | 13 VC_156_0  | 13  | 0.2378 | 1          | 0.2378 | 0 | 0 | 0 | 0.9872 Ref |
| MT596502 | Unassigned | Unassigned | Unassigned | 156_0   | Clustered           | 13 VC_156_0  | 13  | 0.2378 | 1          | 0.2378 | 0 | 0 | 0 | 0.9872 Ref |
| MT596503 | Unassigned | Unassigned | Unassigned | 156_0   | Clustered           | 13 VC_156_0  | 13  | 0.2378 | 1          | 0.2378 | 0 | 0 | 0 | 0.9872 Ref |
| MT596504 | Unassigned | Unassigned | Unassigned | 156_0   | Clustered           | 13 VC_156_0  | 13  | 0.2378 | 1          | 0.2378 | 0 | 0 | 0 | 0.9872 Ref |
| MT596505 | Unassigned | Unassigned | Unassigned | 156_0   | Clustered           | 13 VC_156_0  | 13  | 0.2378 | 1          | 0.2378 | 0 | 0 | 0 | 0.9872 Ref |
| MT596506 | Unassigned | Unassigned | Unassigned | 156_0   | Clustered           | 13 VC_156_0  | 13  | 0.2378 | 1          | 0.2378 | 0 | 0 | 0 | 0.9872 Ref |
| MT601270 | Unassigned | Unassigned | Unassigned | 89_0    | Clustered           | 8 VC_89_0    | 8   | 0.5507 | 1          | 0.5507 | 0 | 0 | 0 | 1 Ref      |
| MT601271 | Unassigned | Unassigned | Unassigned | 89_0    | Clustered           | 8 VC_89_0    | 8   | 0.5507 | 1          | 0.5507 | 0 | 0 | 0 | 1 Ref      |
| MT601272 | Unassigned | Unassigned | Unassigned | 91_1    | Clustered           | 2 VC_91_1    | 2   | 0.0444 | 0.9464689  | 0.042  | 0 | 0 | 0 | 1 Ref      |
| MT601273 | Unassigned | Unassigned | Unassigned | 91_0    | Clustered           | 2 VC_91_0    | 2   | 0.0448 | 0.92505102 | 0.0415 | 0 | 0 | 0 | 1 Ref      |
| MT601274 | Unassigned | Unassigned | Unassigned | 91_0    | Clustered           | 2 VC_91_0    | 2   | 0.0448 | 0.92505102 | 0.0415 | 0 | 0 | 0 | 1 Ref      |
| MT611523 | Unassigned | Unassigned | Unassigned | 297_0   | Clustered           | 10 VC_297_0  | 10  | 0.0971 | 1          | 0.0971 | 0 | 0 | 0 | 1 Ref      |
| MT612988 | Unassigned | Unassigned | Unassigned | 549_0   | Clustered           | 9 VC_549_0   | 9   | 0.2597 | 1          | 0.2597 | 0 | 0 | 0 | 1 Ref      |
| MT612989 | Unassigned | Unassigned | Unassigned | 549_0   | Clustered           | 9 VC_549_0   | 9   | 0.2597 | 1          | 0.2597 | 0 | 0 | 0 | 1 Ref      |
| MT613935 | Unassigned | Unassigned | Unassigned | 127_0   | Clustered           | 17 VC_127_0  | 17  | 0.9222 | 1          | 0.9222 | 0 | 0 | 0 | 1 Ref      |
| MT623546 | Unassigned | Unassigned | Unassigned | 715_0   | Clustered           | 10 VC_715_0  | 10  | 0.8045 | 1          | 0.8045 | 0 | 0 | 0 | 1 Ref      |
| MT623578 | Unassigned | Unassigned | Unassigned | 817_0   | Clustered           | 12 VC_817_0  | 12  | 0.8497 | 1          | 0.8497 | 0 | 0 | 0 | 1 Ref      |
| MT625440 | Unassigned | Unassigned | Unassigned | 399_0   | Clustered           | 49 VC_399_0  | 49  | 0.7927 | 1          | 0.7927 | 0 | 0 | 0 | 1 Ref      |
| MT627482 | Unassigned | Unassigned | Unassigned | 711_0   | Clustered           | 48 VC_711_0  | 48  | 0.8217 | 1          | 0.8217 | 0 | 0 | 0 | 1 Ref      |
| MT630408 | Unassigned | Unassigned | Unassigned | 290_155 | Clustered           | 2 VC_290_155 | 2   | 0.0027 | 0.95044426 | 0.0025 | 0 | 0 | 0 | 1 Ref      |
| MT630433 | Unassigned | Unassigned | Unassigned | 854_0   | Clustered           | 6 VC_854_0   | 6   | 0.514  | 1          | 0.514  | 0 | 0 | 0 | 1 Ref      |
| MT632017 | Unassigned | Unassigned | Unassigned | 654_0   | Clustered           | 115 VC_654_0 | 115 | 0.7303 | 1          | 0.7303 | 0 | 0 | 0 | 0.8764 Ref |
| MT632018 | Unassigned | Unassigned | Unassigned | 654_0   | Clustered           | 115 VC_654_0 | 115 | 0.7303 | 1          | 0.7303 | 0 | 0 | 0 | 0.8764 Ref |
| MT632019 | Unassigned | Unassigned | Unassigned | 654_0   | Clustered           | 115 VC_654_0 | 115 | 0.7303 | 1          | 0.7303 | 0 | 0 | 0 | 0.8764 Ref |
| MT632020 | Unassigned | Unassigned | Unassigned | 654_0   | Clustered           | 115 VC_654_0 | 115 | 0.7303 | 1          | 0.7303 | 0 | 0 | 0 | 0.8764 Ref |
| MT633129 | Unassigned | Unassigned | Unassigned | 714_0   | Clustered           | 71 VC_714_0  | 71  | 0.935  | 1          | 0.935  | 0 | 0 | 0 | 1 Ref      |
| MT635598 | Unassigned | Unassigned | Unassigned | 1044_0  | Clustered           | 5 VC_1044_0  | 5   | 0.757  | 0.99999838 | 0.757  | 0 | 0 | 0 | 1 Ref      |
| MT639639 | Unassigned | Unassigned | Unassigned | 590_0   | Clustered           | 9 VC_590_0   | 9   | 0.4952 | 1          | 0.4952 | 0 | 0 | 0 | 1 Ref      |
| MT639640 | Unassigned | Unassigned | Unassigned | 1136_0  | Clustered           | 40 VC_1136_0 | 40  | 0.8746 | 1          | 0.8746 | 0 | 0 | 0 | 1 Ref      |
| MT639641 | Unassigned | Unassigned | Unassigned | 1212_0  | Clustered           | 21 VC_1212_0 | 21  | 0.711  | 1          | 0.711  | 0 | 0 | 0 | 1 Ref      |
| MT639642 | Unassigned | Unassigned | Unassigned | 1407_0  | Clustered           | 78 VC_1407_0 | 78  | 0.9731 | 1          | 0.9731 | 0 | 0 | 0 | 1 Ref      |
| MT639643 | Unassigned | Unassigned | Unassigned | 1406_0  | Clustered           | 21 VC_1406_0 | 21  | 0.9836 | 1          | 0.9836 | 0 | 0 | 0 | 1 Ref      |
| MT639644 | Unassigned | Unassigned | Unassigned | 335_61  | Clustered           | 8 VC_335_61  | 8   | 0.0394 | 1          | 0.0394 | 0 | 0 | 0 | 0.7857 Ref |
| MT639645 | Unassigned | Unassigned | Unassigned | 225_0   | Clustered           | 3 VC_225_0   | 3   | 0.0477 | 0.99860979 | 0.0477 | 0 | 0 | 0 | 1 Ref      |
| MT639646 | Unassigned | Unassigned | Unassigned | 1408_1  | Clustered           | 2 VC_1408_1  | 2   | 0.0937 | 0.95622325 | 0.0896 | 0 | 0 | 0 | 1 Ref      |
| MT639647 | Unassigned | Unassigned | Unassigned | 1407_0  | Clustered           | 78 VC_1407_0 | 78  | 0.9731 | 1          | 0.9731 | 0 | 0 | 0 | 1 Ref      |
| MT639648 | Unassigned | Unassigned | Unassigned | 385_0   | Clustered           | 24 VC_385_0  | 24  | 0.5516 | 1          | 0.5516 | 0 | 0 | 0 | 1 Ref      |
| MT639649 | Unassigned | Unassigned | Unassigned | 1287_0  | Clustered           | 44 VC_1287_0 | 44  | 1      | 1          | 1      | 0 | 0 | 0 | 1 Ref      |
| MT639650 | Unassigned | Unassigned | Unassigned | 543_1   | Clustered           | 5 VC_543_1   | 5   | 0.0484 | 0.99999947 | 0.0484 | 0 | 0 | 0 | 0.9 Ref    |
| MT639651 | Unassigned | Unassigned | Unassigned | 1219_0  | Clustered           | 24 VC_1219_0 | 24  | 0.9519 | 1          | 0.9519 | 0 | 0 | 0 | 1 Ref      |
| MT639652 | Unassigned | Unassigned | Unassigned | 526_0   | Clustered           | 32 VC_526_0  | 32  | 0.9037 | 1          | 0.9037 | 0 | 0 | 0 | 1 Ref      |
| MT639653 | Unassigned | Unassigned | Unassigned | 1250_0  | Clustered           | 29 VC_1250_0 | 29  | 0.822  | 1          | 0.822  | 0 | 0 | 0 | 1 Ref      |
| MT639654 | Unassigned | Unassigned | Unassigned | 335_23  | Clustered           | 17 VC_335_23 | 17  | 0.0714 | 1          | 0.0714 | 0 | 0 | 0 | 0.6397 Ref |
| MT647605 | Unassigned | Unassigned | Unassigned | 502_0   | Clustered           | 18 VC_502_0  | 18  | 0.8808 | 1          | 0.8808 | 0 | 0 | 0 | 1 Ref      |
| MT647607 | Unassigned | Unassigned | Unassigned | 787_0   | Clustered           | 132 VC_787_0 | 132 | 1      | 1          | 1      | 0 | 0 | 0 | 1 Ref      |
| MT653137 | Unassigned | Unassigned | Unassigned | 654_0   | Clustered           | 115 VC_654_0 | 115 | 0.7303 | 1          | 0.7303 | 0 | 0 | 0 | 0.8764 Ref |
| MT653143 | Unassigned | Unassigned | Unassigned | 198_36  | Clustered/Singleton | 1 VC_198_36  | 1   | 0      | 1          | 0      | 0 | 0 | 0 | 1 Ref      |
| MT653144 | Unassigned | Unassigned | Unassigned | 654_0   | Clustered           | 115 VC_654_0 | 115 | 0.7303 | 1          | 0.7303 | 0 | 0 | 0 | 0.8764 Ref |
| MT653145 | Unassigned | Unassigned | Unassigned | 199_32  | Clustered           | 12 VC_199_32 | 12  | 0.0676 | 1          | 0.0676 | 0 | 0 | 0 | 0.7576 Ref |
| MT653146 | Unassigned | Unassigned | Unassigned | 198_37  | Clustered/Singleton | 1 VC_198_37  | 1   | 0      | 1          | 0      | 0 | 0 | 0 | 1 Ref      |
| MT657330 | Unassigned | Unassigned | Unassigned | 834_0   | Clustered           | 18 VC_834_0  | 18  | 0.9116 | 1          | 0.9116 | 0 | 0 | 0 | 1 Ref      |
| MT657331 | Unassigned | Unassigned | Unassigned | 532_0   | Clustered           | 75 VC_532_0  | 75  | 0.9393 | 1          | 0.9393 | 0 | 0 | 0 | 1 Ref      |
| MT657332 | Unassigned | Unassigned | Unassigned | 1407_0  | Clustered           | 78 VC_1407_0 | 78  | 0.9731 | 1          | 0.9731 | 0 | 0 | 0 | 1 Ref      |
| MT657333 | Unassigned | Unassigned | Unassigned | 1212_0  | Clustered           | 21 VC_1212_0 | 21  | 0.711  | 1          | 0.711  | 0 | 0 | 0 | 1 Ref      |
| MT657334 | Unassigned | Unassigned | Unassigned | 1424_0  | Clustered           | 31 VC_1424_0 | 31  | 0.8834 | 1          | 0.8834 | 0 | 0 | 0 | 1 Ref      |
| MT657335 | Unassigned | Unassigned | Unassigned | 528_0   | Clustered           | 12 VC_528_0  | 12  | 0.3923 | 1          | 0.3923 | 0 | 0 | 0 | 0.9697 Ref |
| MT657336 | Unassigned | Unassigned | Unassigned | 1415_0  | Clustered           | 31 VC_1415_0 | 31  | 0.8456 | 1          | 0.8456 | 0 | 0 | 0 | 1 Ref      |
| MT657337 | Unassigned | Unassigned | Unassigned | 1424_0  | Clustered           | 31 VC_1424_0 | 31  | 0.8834 | 1          | 0.8834 | 0 | 0 | 0 | 1 Ref      |
| MT657338 | Unassigned | Unassigned | Unassigned | 230_0   | Clustered           | 38 VC_230_0  | 38  | 0.9076 | 1          | 0.9076 | 0 | 0 | 0 | 1 Ref      |
| MT657339 | Unassigned | Unassigned | Unassigned | 1224_0  | Clustered           | 4 VC_1224_0  | 4   | 0.2813 | 0.99997676 | 0.2813 | 0 | 0 | 0 | 1 Ref      |
| MT657340 | Unassigned | Unassigned | Unassigned | 901_0   | Clustered           | 31 VC_901_0  | 31  | 0.8235 | 1          | 0.8235 | 0 | 0 | 0 | 0.8194 Ref |
| MT657341 | Unassigned | Unassigned | Unassigned | 785_2   | Clustered           | 7 VC_785_2   | 7   | 0.2595 | 1          | 0.2595 | 0 | 0 | 0 | 1 Ref      |
| MT657342 | Unassigned | Unassigned | Unassigned | 335_49  | Clustered           | 17 VC_335_49 | 17  | 0.0731 | 1          | 0.0731 | 0 | 0 | 0 | 0.7721 Ref |
| MT657343 | Unassigned | Unassigned | Unassigned | 1203_0  | Clustered           | 28 VC_1203_0 | 28  | 0.4905 | 1          | 0.4905 | 0 | 0 | 0 | 1 Ref      |
| MT657344 | Unassigned | Unassigned | Unassigned | 1203_0  | Clustered           | 28 VC_1203_0 | 28  | 0.4905 | 1          | 0.4905 | 0 | 0 | 0 | 1 Ref      |
| MT658802 | Unassigned | Unassigned | Unassigned | 785_2   | Clustered           | 7 VC_785_2   | 7   | 0.2595 | 1          | 0.2595 | 0 | 0 | 0 | 1 Ref      |
| MT658803 | Unassigned | Unassigned | Unassigned | 785_1   | Clustered           | 9 VC_785_1   | 9   | 0.3679 | 1          | 0.3679 | 0 | 0 | 0 | 1 Ref      |
| MT658804 | Unassigned | Unassigned | Unassigned | 223_6   | Clustered           | 42 VC_223_6  | 42  | 0.4717 | 1          | 0.4717 | 0 | 0 | 0 | 0.8351 Ref |
| MT658805 | Unassigned | Unassigned | Unassigned | 919_0   | Clustered           | 3 VC_919_0   | 3   | 0.3486 | 0.99831298 | 0.348  | 0 | 0 | 0 | 1 Ref      |
| MT661596 | Unassigned | Unassigned | Unassigned | 507_2   | Clustered/Singleton | 1 VC_507_2   | 1   | 0      | 1          | 0      | 0 | 0 | 0 | 1 Ref      |
| MT661597 | Unassigned | Unassigned | Unassigned | 711_0   | Clustered           | 48 VC_711_0  | 48  | 0.8217 | 1          | 0.8217 | 0 | 0 | 0 | 1 Ref      |
| MT661598 | Unassigned | Unassigned | Unassigned | 711_0   | Clustered           | 48 VC_711_0  | 48  | 0.8217 | 1          | 0.8217 | 0 | 0 | 0 | 1 Ref      |
| MT662115 | Unassigned | Unassigned | Unassigned | 5_0     | Clustered           | 27 VC_5_0    | 27  | 0.9599 | 1          | 0.9599 | 0 | 0 | 0 | 1 Ref      |
| MT663719 | Unassigned | Unassigned | Unassigned | 440_0   | Clustered           | 33 VC_440_0  | 33  | 0.992  | 1          | 0.992  | 0 | 0 | 0 | 1 Ref      |
| MT664722 | Unassigned | Unassigned | Unassigned | 836_1   | Clustered           | 4 VC_836_1   | 4   | 0.2236 | 0.99998426 | 0.2236 | 0 | 0 | 0 | 1 Ref      |
| MT664984 | Unassigned | Unassigned | Unassigned | 175_0   | Clustered           | 20 VC_175_0  | 20  | 0.7504 | 1          | 0.7504 | 0 | 0 | 0 | 1 Ref      |
| MT668623 | Unassigned | Unassigned | Unassigned | 753_0   | Clustered           | 26 VC_753_0  | 26  | 0.9562 | 1          | 0.9562 | 0 | 0 | 0 | 1 Ref      |



|          |            |            |            |         |                     |              |     |        |            |        |   |   |   |            |
|----------|------------|------------|------------|---------|---------------------|--------------|-----|--------|------------|--------|---|---|---|------------|
| MT668624 | Unassigned | Unassigned | Unassigned | 753_0   | Clustered           | 26 VC_753_0  | 26  | 0.9562 | 1          | 0.9562 | 0 | 0 | 0 | 1 Ref      |
| MT670417 | Unassigned | Unassigned | Unassigned | 79_3    | Clustered           | 11 VC_79_3   | 11  | 0.2561 | 1          | 0.2561 | 0 | 0 | 0 | 1 Ref      |
| MT670418 | Unassigned | Unassigned | Unassigned | 79_3    | Clustered           | 11 VC_79_3   | 11  | 0.2561 | 1          | 0.2561 | 0 | 0 | 0 | 1 Ref      |
| MT670419 | Unassigned | Unassigned | Unassigned | 79_3    | Clustered           | 11 VC_79_3   | 11  | 0.2561 | 1          | 0.2561 | 0 | 0 | 0 | 1 Ref      |
| MT670420 | Unassigned | Unassigned | Unassigned | 79_3    | Clustered           | 11 VC_79_3   | 11  | 0.2561 | 1          | 0.2561 | 0 | 0 | 0 | 1 Ref      |
| MT670421 | Unassigned | Unassigned | Unassigned | 79_3    | Clustered           | 11 VC_79_3   | 11  | 0.2561 | 1          | 0.2561 | 0 | 0 | 0 | 1 Ref      |
| MT670422 | Unassigned | Unassigned | Unassigned | 79_3    | Clustered           | 11 VC_79_3   | 11  | 0.2561 | 1          | 0.2561 | 0 | 0 | 0 | 1 Ref      |
| MT675124 | Unassigned | Unassigned | Unassigned | 611_0   | Clustered           | 50 VC_611_0  | 50  | 0.7306 | 1          | 0.7306 | 0 | 0 | 0 | 1 Ref      |
| MT675125 | Unassigned | Unassigned | Unassigned | 611_0   | Clustered           | 50 VC_611_0  | 50  | 0.7306 | 1          | 0.7306 | 0 | 0 | 0 | 1 Ref      |
| MT675126 | Unassigned | Unassigned | Unassigned | 611_0   | Clustered           | 50 VC_611_0  | 50  | 0.7306 | 1          | 0.7306 | 0 | 0 | 0 | 1 Ref      |
| MT677933 | Unassigned | Unassigned | Unassigned | 654_1   | Clustered           | 27 VC_654_1  | 27  | 0.2571 | 1          | 0.2571 | 0 | 0 | 0 | 0.9858 Ref |
| MT677934 | Unassigned | Unassigned | Unassigned | 654_0   | Clustered           | 115 VC_654_0 | 115 | 0.7303 | 1          | 0.7303 | 0 | 0 | 0 | 0.8764 Ref |
| MT679221 | Unassigned | Unassigned | Unassigned | 994_5   | Clustered           | 19 VC_994_5  | 19  | 0.2622 | 1          | 0.2622 | 0 | 0 | 0 | 1 Ref      |
| MT680615 | Unassigned | Unassigned | Unassigned | 466_0   | Clustered           | 66 VC_466_0  | 66  | 0.9246 | 1          | 0.9246 | 0 | 0 | 0 | 1 Ref      |
| MT681669 | Unassigned | Unassigned | Unassigned | 405_0   | Clustered           | 126 VC_405_0 | 126 | 0.9614 | 1          | 0.9614 | 0 | 0 | 0 | 1 Ref      |
| MT682064 | Unassigned | Unassigned | Unassigned | 474_0   | Clustered           | 19 VC_474_0  | 19  | 0.3729 | 1          | 0.3729 | 0 | 0 | 0 | 1 Ref      |
| MT682065 | Unassigned | Unassigned | Unassigned | 113_0   | Clustered           | 91 VC_113_0  | 91  | 0.9584 | 1          | 0.9584 | 0 | 0 | 0 | 1 Ref      |
| MT682386 | Unassigned | Unassigned | Unassigned | 907_0   | Clustered           | 32 VC_907_0  | 32  | 0.9964 | 1          | 0.9964 | 0 | 0 | 0 | 1 Ref      |
| MT682387 | Unassigned | Unassigned | Unassigned | 907_0   | Clustered           | 32 VC_907_0  | 32  | 0.9964 | 1          | 0.9964 | 0 | 0 | 0 | 1 Ref      |
| MT682388 | Unassigned | Unassigned | Unassigned | 907_0   | Clustered           | 32 VC_907_0  | 32  | 0.9964 | 1          | 0.9964 | 0 | 0 | 0 | 1 Ref      |
| MT682389 | Unassigned | Unassigned | Unassigned | 907_0   | Clustered           | 32 VC_907_0  | 32  | 0.9964 | 1          | 0.9964 | 0 | 0 | 0 | 1 Ref      |
| MT682390 | Unassigned | Unassigned | Unassigned | 907_0   | Clustered           | 32 VC_907_0  | 32  | 0.9964 | 1          | 0.9964 | 0 | 0 | 0 | 1 Ref      |
| MT682391 | Unassigned | Unassigned | Unassigned | 907_0   | Clustered           | 32 VC_907_0  | 32  | 0.9964 | 1          | 0.9964 | 0 | 0 | 0 | 1 Ref      |
| MT682705 | Unassigned | Unassigned | Unassigned | 737_0   | Clustered           | 13 VC_737_0  | 13  | 0.5083 | 1          | 0.5083 | 0 | 0 | 0 | 1 Ref      |
| MT682706 | Unassigned | Unassigned | Unassigned | 470_0   | Clustered           | 62 VC_470_0  | 62  | 0.902  | 1          | 0.902  | 0 | 0 | 0 | 1 Ref      |
| MT682707 | Unassigned | Unassigned | Unassigned | 465_0   | Clustered           | 80 VC_465_0  | 80  | 0.9988 | 1          | 0.9988 | 0 | 0 | 0 | 1 Ref      |
| MT682708 | Unassigned | Unassigned | Unassigned | 801_0   | Clustered           | 37 VC_801_0  | 37  | 0.5672 | 1          | 0.5672 | 0 | 0 | 0 | 1 Ref      |
| MT682709 | Unassigned | Unassigned | Unassigned | 290_171 | Clustered/Singleton | 1 VC_290_171 | 1   | 0      | 1          | 0      | 0 | 0 | 0 | 1 Ref      |
| MT682710 | Unassigned | Unassigned | Unassigned | 290_72  | Clustered/Singleton | 1 VC_290_72  | 1   | 0      | 1          | 0      | 0 | 0 | 0 | 1 Ref      |
| MT682711 | Unassigned | Unassigned | Unassigned | 297_5   | Clustered           | 14 VC_297_5  | 14  | 0.141  | 1          | 0.141  | 0 | 0 | 0 | 0.9231 Ref |
| MT682712 | Unassigned | Unassigned | Unassigned | 290_77  | Clustered           | 2 VC_290_77  | 2   | 0.0024 | 0.95149584 | 0.0023 | 0 | 0 | 0 | 1 Ref      |
| MT682713 | Unassigned | Unassigned | Unassigned | 290_54  | Clustered/Singleton | 1 VC_290_54  | 1   | 0      | 1          | 0      | 0 | 0 | 0 | 1 Ref      |
| MT682714 | Unassigned | Unassigned | Unassigned | 290_74  | Clustered/Singleton | 1 VC_290_74  | 1   | 0      | 1          | 0      | 0 | 0 | 0 | 1 Ref      |
| MT682715 | Unassigned | Unassigned | Unassigned | 595_0   | Clustered           | 35 VC_595_0  | 35  | 0.8809 | 1          | 0.8809 | 0 | 0 | 0 | 1 Ref      |
| MT682716 | Unassigned | Unassigned | Unassigned | 794_20  | Clustered           | 2 VC_794_20  | 2   | 0.006  | 0.58868587 | 0.0035 | 0 | 0 | 0 | 1 Ref      |
| MT684586 | Unassigned | Unassigned | Unassigned | 538_47  | Clustered/Singleton | 1 VC_538_47  | 1   | 0      | 1          | 0      | 0 | 0 | 0 | 1 Ref      |
| MT684587 | Unassigned | Unassigned | Unassigned | 1424_0  | Clustered           | 31 VC_1424_0 | 31  | 0.8834 | 1          | 0.8834 | 0 | 0 | 0 | 1 Ref      |
| MT684588 | Unassigned | Unassigned | Unassigned | 539_0   | Clustered           | 37 VC_539_0  | 37  | 0.911  | 1          | 0.911  | 0 | 0 | 0 | 1 Ref      |
| MT684589 | Unassigned | Unassigned | Unassigned | 901_0   | Clustered           | 31 VC_901_0  | 31  | 0.8235 | 1          | 0.8235 | 0 | 0 | 0 | 0.8194 Ref |
| MT684590 | Unassigned | Unassigned | Unassigned | 1114_2  | Clustered           | 5 VC_1114_2  | 5   | 0.0531 | 0.99997362 | 0.0531 | 0 | 0 | 0 | 0.9 Ref    |
| MT684591 | Unassigned | Unassigned | Unassigned | 1406_0  | Clustered           | 21 VC_1406_0 | 21  | 0.9836 | 1          | 0.9836 | 0 | 0 | 0 | 1 Ref      |
| MT684592 | Unassigned | Unassigned | Unassigned | 1406_0  | Clustered           | 21 VC_1406_0 | 21  | 0.9836 | 1          | 0.9836 | 0 | 0 | 0 | 1 Ref      |
| MT684593 | Unassigned | Unassigned | Unassigned | 538_15  | Clustered           | 2 VC_538_15  | 2   | 0.0078 | 0.957604   | 0.0075 | 0 | 0 | 0 | 0 Ref      |
| MT684594 | Unassigned | Unassigned | Unassigned | 834_0   | Clustered           | 18 VC_834_0  | 18  | 0.9116 | 1          | 0.9116 | 0 | 0 | 0 | 1 Ref      |
| MT684595 | Unassigned | Unassigned | Unassigned | 538_14  | Clustered/Singleton | 1 VC_538_14  | 1   | 0      | 1          | 0      | 0 | 0 | 0 | 1 Ref      |
| MT684596 | Unassigned | Unassigned | Unassigned | 1278_0  | Clustered           | 19 VC_1278_0 | 19  | 1      | 1          | 1      | 0 | 0 | 0 | 1 Ref      |
| MT684597 | Unassigned | Unassigned | Unassigned | 538_6   | Clustered           | 3 VC_538_6   | 3   | 0.0273 | 0.99859866 | 0.0272 | 0 | 0 | 0 | 1 Ref      |
| MT684598 | Unassigned | Unassigned | Unassigned | 1115_5  | Clustered           | 3 VC_1115_5  | 3   | 0.0473 | 0.98997321 | 0.0468 | 0 | 0 | 0 | 1 Ref      |
| MT684599 | Unassigned | Unassigned | Unassigned | 919_1   | Clustered           | 4 VC_919_1   | 4   | 0.4515 | 0.99998463 | 0.4515 | 0 | 0 | 0 | 1 Ref      |
| MT684600 | Unassigned | Unassigned | Unassigned | 901_0   | Clustered           | 31 VC_901_0  | 31  | 0.8235 | 1          | 0.8235 | 0 | 0 | 0 | 0.8194 Ref |
| MT684601 | Unassigned | Unassigned | Unassigned | 538_6   | Clustered           | 3 VC_538_6   | 3   | 0.0273 | 0.99859866 | 0.0272 | 0 | 0 | 0 | 1 Ref      |
| MT684602 | Unassigned | Unassigned | Unassigned | 588_0   | Clustered           | 8 VC_588_0   | 8   | 0.5695 | 1          | 0.5695 | 0 | 0 | 0 | 1 Ref      |
| MT701586 | Unassigned | Unassigned | Unassigned | 127_0   | Clustered           | 17 VC_127_0  | 17  | 0.9222 | 1          | 0.9222 | 0 | 0 | 0 | 1 Ref      |
| MT701587 | Unassigned | Unassigned | Unassigned | 249_1   | Clustered           | 21 VC_249_1  | 21  | 0.6775 | 1          | 0.6775 | 0 | 0 | 0 | 0.8476 Ref |
| MT701588 | Unassigned | Unassigned | Unassigned | 509_0   | Clustered           | 36 VC_509_0  | 36  | 0.5291 | 1          | 0.5291 | 0 | 0 | 0 | 0.9714 Ref |
| MT701589 | Unassigned | Unassigned | Unassigned | 113_0   | Clustered           | 91 VC_113_0  | 91  | 0.9584 | 1          | 0.9584 | 0 | 0 | 0 | 1 Ref      |
| MT701591 | Unassigned | Unassigned | Unassigned | 1_0     | Clustered           | 54 VC_1_0    | 54  | 0.8518 | 1          | 0.8518 | 0 | 0 | 0 | 1 Ref      |
| MT701592 | Unassigned | Unassigned | Unassigned | 971_0   | Clustered           | 40 VC_971_0  | 40  | 0.6793 | 1          | 0.6793 | 0 | 0 | 0 | 0.9359 Ref |
| MT701593 | Unassigned | Unassigned | Unassigned | 389_0   | Clustered           | 3 VC_389_0   | 3   | 0.2381 | 0.99789919 | 0.2376 | 0 | 0 | 0 | 1 Ref      |
| MT701594 | Unassigned | Unassigned | Unassigned | 1015_1  | Clustered           | 26 VC_1015_1 | 26  | 0.6989 | 1          | 0.6989 | 0 | 0 | 0 | 1 Ref      |
| MT701595 | Unassigned | Unassigned | Unassigned | 389_0   | Clustered           | 3 VC_389_0   | 3   | 0.2381 | 0.99789919 | 0.2376 | 0 | 0 | 0 | 1 Ref      |
| MT701596 | Unassigned | Unassigned | Unassigned | 389_0   | Clustered           | 3 VC_389_0   | 3   | 0.2381 | 0.99789919 | 0.2376 | 0 | 0 | 0 | 1 Ref      |
| MT701597 | Unassigned | Unassigned | Unassigned | 1015_1  | Clustered           | 26 VC_1015_1 | 26  | 0.6989 | 1          | 0.6989 | 0 | 0 | 0 | 1 Ref      |
| MT701598 | Unassigned | Unassigned | Unassigned | 1016_0  | Clustered           | 62 VC_1016_0 | 62  | 0.8638 | 1          | 0.8638 | 0 | 0 | 0 | 0.743 Ref  |
| MT708544 | Unassigned | Unassigned | Unassigned | 1020_0  | Clustered           | 22 VC_1020_0 | 22  | 0.895  | 1          | 0.895  | 0 | 0 | 0 | 1 Ref      |
| MT708546 | Unassigned | Unassigned | Unassigned | 1020_0  | Clustered           | 22 VC_1020_0 | 22  | 0.895  | 1          | 0.895  | 0 | 0 | 0 | 1 Ref      |
| MT708547 | Unassigned | Unassigned | Unassigned | 170_10  | Clustered           | 5 VC_170_10  | 5   | 0.0614 | 0.96483582 | 0.0592 | 0 | 0 | 0 | 1 Ref      |
| MT708548 | Unassigned | Unassigned | Unassigned | 1015_1  | Clustered           | 26 VC_1015_1 | 26  | 0.6989 | 1          | 0.6989 | 0 | 0 | 0 | 1 Ref      |
| MT708549 | Unassigned | Unassigned | Unassigned | 553_0   | Clustered           | 3 VC_553_0   | 3   | 0.0872 | 0.99853671 | 0.0871 | 0 | 0 | 0 | 1 Ref      |
| MT708550 | Unassigned | Unassigned | Unassigned | 127_0   | Clustered           | 17 VC_127_0  | 17  | 0.9222 | 1          | 0.9222 | 0 | 0 | 0 | 1 Ref      |
| MT710307 | Unassigned | Unassigned | Unassigned | 994_1   | Clustered           | 8 VC_994_1   | 8   | 0.0877 | 0.92136649 | 0.0808 | 0 | 0 | 0 | 1 Ref      |
| MT711523 | Unassigned | Unassigned | Unassigned | 655_0   | Clustered           | 45 VC_655_0  | 45  | 0.7722 | 1          | 0.7722 | 0 | 0 | 0 | 1 Ref      |
| MT711524 | Unassigned | Unassigned | Unassigned | 655_0   | Clustered           | 45 VC_655_0  | 45  | 0.7722 | 1          | 0.7722 | 0 | 0 | 0 | 1 Ref      |
| MT711525 | Unassigned | Unassigned | Unassigned | 655_0   | Clustered           | 45 VC_655_0  | 45  | 0.7722 | 1          | 0.7722 | 0 | 0 | 0 | 1 Ref      |
| MT711526 | Unassigned | Unassigned | Unassigned | 655_0   | Clustered           | 45 VC_655_0  | 45  | 0.7722 | 1          | 0.7722 | 0 | 0 | 0 | 1 Ref      |
| MT711527 | Unassigned | Unassigned | Unassigned | 655_0   | Clustered           | 45 VC_655_0  | 45  | 0.7722 | 1          | 0.7722 | 0 | 0 | 0 | 1 Ref      |
| MT711528 | Unassigned | Unassigned | Unassigned | 655_0   | Clustered           | 45 VC_655_0  | 45  | 0.7722 | 1          | 0.7722 | 0 | 0 | 0 | 1 Ref      |
| MT711887 | Unassigned | Unassigned | Unassigned | 132_0   | Clustered           | 19 VC_132_0  | 19  | 0.6051 | 1          | 0.6051 | 0 | 0 | 0 | 1 Ref      |
| MT711888 | Unassigned | Unassigned | Unassigned | 129_2   | Clustered/Singleton | 1 VC_129_2   | 1   | 0      | 1          | 0      | 0 | 0 | 0 | 1 Ref      |
| MT711889 | Unassigned | Unassigned | Unassigned | 131_0   | Clustered           | 43 VC_131_0  | 43  | 0.8853 | 1          | 0.8853 | 0 | 0 | 0 | 1 Ref      |
| MT711890 | Unassigned | Unassigned | Unassigned | 131_0   | Clustered           | 43 VC_131_0  | 43  | 0.8853 | 1          | 0.8853 | 0 | 0 | 0 | 1 Ref      |



|          |            |            |            |        |                     |              |     |        |            |        |   |   |   |            |
|----------|------------|------------|------------|--------|---------------------|--------------|-----|--------|------------|--------|---|---|---|------------|
| MT711975 | Unassigned | Unassigned | Unassigned | 742_0  | Clustered           | 11 VC_742_0  | 11  | 0.5046 | 1          | 0.5046 | 0 | 0 | 0 | 1 Ref      |
| MT711976 | Unassigned | Unassigned | Unassigned | 1114_5 | Clustered/Singleton | 1 VC_1114_5  | 1   | 0      | 1          | 0      | 0 | 0 | 0 | 1 Ref      |
| MT711978 | Unassigned | Unassigned | Unassigned | 1016_0 | Clustered           | 62 VC_1016_0 | 62  | 0.8638 | 1          | 0.8638 | 0 | 0 | 0 | 0.743 Ref  |
| MT711979 | Unassigned | Unassigned | Unassigned | 1016_0 | Clustered           | 62 VC_1016_0 | 62  | 0.8638 | 1          | 0.8638 | 0 | 0 | 0 | 0.743 Ref  |
| MT713136 | Unassigned | Unassigned | Unassigned | 457_4  | Clustered           | 10 VC_457_4  | 10  | 0.3316 | 1          | 0.3316 | 0 | 0 | 0 | 0.9333 Ref |
| MT720689 | Unassigned | Unassigned | Unassigned | 941_0  | Clustered           | 5 VC_941_0   | 5   | 0.7412 | 0.99999276 | 0.7412 | 0 | 0 | 0 | 1 Ref      |
| MT723932 | Unassigned | Unassigned | Unassigned | 539_0  | Clustered           | 37 VC_539_0  | 37  | 0.911  | 1          | 0.911  | 0 | 0 | 0 | 1 Ref      |
| MT723933 | Unassigned | Unassigned | Unassigned | 743_0  | Clustered           | 3 VC_743_0   | 3   | 0.3955 | 0.99850259 | 0.3949 | 0 | 0 | 0 | 1 Ref      |
| MT723934 | Unassigned | Unassigned | Unassigned | 1136_0 | Clustered           | 40 VC_1136_0 | 40  | 0.8746 | 1          | 0.8746 | 0 | 0 | 0 | 1 Ref      |
| MT723935 | Unassigned | Unassigned | Unassigned | 1217_0 | Clustered           | 41 VC_1217_0 | 41  | 0.9546 | 1          | 0.9546 | 0 | 0 | 0 | 0.9976 Ref |
| MT723936 | Unassigned | Unassigned | Unassigned | 1217_0 | Clustered           | 41 VC_1217_0 | 41  | 0.9546 | 1          | 0.9546 | 0 | 0 | 0 | 0.9976 Ref |
| MT723937 | Unassigned | Unassigned | Unassigned | 1136_0 | Clustered           | 40 VC_1136_0 | 40  | 0.8746 | 1          | 0.8746 | 0 | 0 | 0 | 1 Ref      |
| MT723938 | Unassigned | Unassigned | Unassigned | 543_0  | Clustered           | 25 VC_543_0  | 25  | 0.4584 | 1          | 0.4584 | 0 | 0 | 0 | 1 Ref      |
| MT723939 | Unassigned | Unassigned | Unassigned | 535_1  | Clustered           | 108 VC_535_1 | 108 | 0.8479 | 1          | 0.8479 | 0 | 0 | 0 | 0.9955 Ref |
| MT723940 | Unassigned | Unassigned | Unassigned | 244_1  | Clustered           | 13 VC_244_1  | 13  | 0.1766 | 1          | 0.1766 | 0 | 0 | 0 | 0.7308 Ref |
| MT723941 | Unassigned | Unassigned | Unassigned | 1136_0 | Clustered           | 40 VC_1136_0 | 40  | 0.8746 | 1          | 0.8746 | 0 | 0 | 0 | 1 Ref      |
| MT723942 | Unassigned | Unassigned | Unassigned | 1217_0 | Clustered           | 41 VC_1217_0 | 41  | 0.9546 | 1          | 0.9546 | 0 | 0 | 0 | 0.9976 Ref |
| MT723943 | Unassigned | Unassigned | Unassigned | 571_0  | Clustered           | 16 VC_571_0  | 16  | 0.091  | 1          | 0.091  | 0 | 0 | 0 | 0.6667 Ref |
| MT723944 | Unassigned | Unassigned | Unassigned | 579_39 | Clustered           | 3 VC_579_39  | 3   | 0.0063 | 0.72858376 | 0.0046 | 0 | 0 | 0 | 0.6667 Ref |
| MT723945 | Unassigned | Unassigned | Unassigned | 579_21 | Clustered/Singleton | 1 VC_579_21  | 1   | 0      | 1          | 0      | 0 | 0 | 0 | 1 Ref      |
| MT732432 | Unassigned | Unassigned | Unassigned | 1057_0 | Clustered           | 5 VC_1057_0  | 5   | 0.8612 | 0.99999999 | 0.8612 | 0 | 0 | 0 | 1 Ref      |
| MT732433 | Unassigned | Unassigned | Unassigned | 1057_0 | Clustered           | 5 VC_1057_0  | 5   | 0.8612 | 0.99999999 | 0.8612 | 0 | 0 | 0 | 1 Ref      |
| MT732434 | Unassigned | Unassigned | Unassigned | 1057_0 | Clustered           | 5 VC_1057_0  | 5   | 0.8612 | 0.99999999 | 0.8612 | 0 | 0 | 0 | 1 Ref      |
| MT732435 | Unassigned | Unassigned | Unassigned | 1052_0 | Clustered           | 8 VC_1052_0  | 8   | 0.941  | 1          | 0.941  | 0 | 0 | 0 | 1 Ref      |
| MT732436 | Unassigned | Unassigned | Unassigned | 1052_0 | Clustered           | 8 VC_1052_0  | 8   | 0.941  | 1          | 0.941  | 0 | 0 | 0 | 1 Ref      |
| MT732437 | Unassigned | Unassigned | Unassigned | 1052_0 | Clustered           | 8 VC_1052_0  | 8   | 0.941  | 1          | 0.941  | 0 | 0 | 0 | 1 Ref      |
| MT732438 | Unassigned | Unassigned | Unassigned | 1052_0 | Clustered           | 8 VC_1052_0  | 8   | 0.941  | 1          | 0.941  | 0 | 0 | 0 | 1 Ref      |
| MT732439 | Unassigned | Unassigned | Unassigned | 1052_0 | Clustered           | 8 VC_1052_0  | 8   | 0.941  | 1          | 0.941  | 0 | 0 | 0 | 1 Ref      |
| MT732440 | Unassigned | Unassigned | Unassigned | 1052_0 | Clustered           | 8 VC_1052_0  | 8   | 0.941  | 1          | 0.941  | 0 | 0 | 0 | 1 Ref      |
| MT732441 | Unassigned | Unassigned | Unassigned | 1052_0 | Clustered           | 8 VC_1052_0  | 8   | 0.941  | 1          | 0.941  | 0 | 0 | 0 | 1 Ref      |
| MT732442 | Unassigned | Unassigned | Unassigned | 1052_0 | Clustered           | 8 VC_1052_0  | 8   | 0.941  | 1          | 0.941  | 0 | 0 | 0 | 1 Ref      |
| MT732443 | Unassigned | Unassigned | Unassigned | 459_0  | Clustered           | 2 VC_459_0   | 2   | 0.3946 | 0.92263554 | 0.364  | 0 | 0 | 0 | 1 Ref      |
| MT732444 | Unassigned | Unassigned | Unassigned | 459_0  | Clustered           | 2 VC_459_0   | 2   | 0.3946 | 0.92263554 | 0.364  | 0 | 0 | 0 | 1 Ref      |
| MT732445 | Unassigned | Unassigned | Unassigned | 1047_0 | Clustered           | 9 VC_1047_0  | 9   | 1      | 1          | 1      | 0 | 0 | 0 | 1 Ref      |
| MT732446 | Unassigned | Unassigned | Unassigned | 1047_0 | Clustered           | 9 VC_1047_0  | 9   | 1      | 1          | 1      | 0 | 0 | 0 | 1 Ref      |
| MT732447 | Unassigned | Unassigned | Unassigned | 1047_0 | Clustered           | 9 VC_1047_0  | 9   | 1      | 1          | 1      | 0 | 0 | 0 | 1 Ref      |
| MT732448 | Unassigned | Unassigned | Unassigned | 1047_0 | Clustered           | 9 VC_1047_0  | 9   | 1      | 1          | 1      | 0 | 0 | 0 | 1 Ref      |
| MT732449 | Unassigned | Unassigned | Unassigned | 1047_0 | Clustered           | 9 VC_1047_0  | 9   | 1      | 1          | 1      | 0 | 0 | 0 | 1 Ref      |
| MT732450 | Unassigned | Unassigned | Unassigned | 1508_0 | Clustered           | 6 VC_1508_0  | 6   | 1      | 0          | 0      | 0 | 0 | 0 | 1 Ref      |
| MT732451 | Unassigned | Unassigned | Unassigned | 1508_0 | Clustered           | 6 VC_1508_0  | 6   | 1      | 0          | 0      | 0 | 0 | 0 | 1 Ref      |
| MT732452 | Unassigned | Unassigned | Unassigned | 1508_0 | Clustered           | 6 VC_1508_0  | 6   | 1      | 0          | 0      | 0 | 0 | 0 | 1 Ref      |
| MT732453 | Unassigned | Unassigned | Unassigned | 1508_0 | Clustered           | 6 VC_1508_0  | 6   | 1      | 0          | 0      | 0 | 0 | 0 | 1 Ref      |
| MT732454 | Unassigned | Unassigned | Unassigned | 1508_0 | Clustered           | 6 VC_1508_0  | 6   | 1      | 0          | 0      | 0 | 0 | 0 | 1 Ref      |
| MT732455 | Unassigned | Unassigned | Unassigned | 1508_0 | Clustered           | 6 VC_1508_0  | 6   | 1      | 0          | 0      | 0 | 0 | 0 | 1 Ref      |
| MT732458 | Unassigned | Unassigned | Unassigned | 1484_0 | Clustered           | 15 VC_1484_0 | 15  | 0.9981 | 1          | 0.9981 | 0 | 0 | 0 | 1 Ref      |
| MT732459 | Unassigned | Unassigned | Unassigned | 1484_0 | Clustered           | 15 VC_1484_0 | 15  | 0.9981 | 1          | 0.9981 | 0 | 0 | 0 | 1 Ref      |
| MT732460 | Unassigned | Unassigned | Unassigned | 1484_0 | Clustered           | 15 VC_1484_0 | 15  | 0.9981 | 1          | 0.9981 | 0 | 0 | 0 | 1 Ref      |
| MT732461 | Unassigned | Unassigned | Unassigned | 1484_0 | Clustered           | 15 VC_1484_0 | 15  | 0.9981 | 1          | 0.9981 | 0 | 0 | 0 | 1 Ref      |
| MT732462 | Unassigned | Unassigned | Unassigned | 1484_0 | Clustered           | 15 VC_1484_0 | 15  | 0.9981 | 1          | 0.9981 | 0 | 0 | 0 | 1 Ref      |
| MT732463 | Unassigned | Unassigned | Unassigned | 1484_0 | Clustered           | 15 VC_1484_0 | 15  | 0.9981 | 1          | 0.9981 | 0 | 0 | 0 | 1 Ref      |
| MT732464 | Unassigned | Unassigned | Unassigned | 1484_0 | Clustered           | 15 VC_1484_0 | 15  | 0.9981 | 1          | 0.9981 | 0 | 0 | 0 | 1 Ref      |
| MT732465 | Unassigned | Unassigned | Unassigned | 1484_0 | Clustered           | 15 VC_1484_0 | 15  | 0.9981 | 1          | 0.9981 | 0 | 0 | 0 | 1 Ref      |
| MT732466 | Unassigned | Unassigned | Unassigned | 1484_0 | Clustered           | 15 VC_1484_0 | 15  | 0.9981 | 1          | 0.9981 | 0 | 0 | 0 | 1 Ref      |
| MT732467 | Unassigned | Unassigned | Unassigned | 1484_0 | Clustered           | 15 VC_1484_0 | 15  | 0.9981 | 1          | 0.9981 | 0 | 0 | 0 | 1 Ref      |
| MT732468 | Unassigned | Unassigned | Unassigned | 1484_0 | Clustered           | 15 VC_1484_0 | 15  | 0.9981 | 1          | 0.9981 | 0 | 0 | 0 | 1 Ref      |
| MT732469 | Unassigned | Unassigned | Unassigned | 1484_0 | Clustered           | 15 VC_1484_0 | 15  | 0.9981 | 1          | 0.9981 | 0 | 0 | 0 | 1 Ref      |
| MT732470 | Unassigned | Unassigned | Unassigned | 1484_0 | Clustered           | 15 VC_1484_0 | 15  | 0.9981 | 1          | 0.9981 | 0 | 0 | 0 | 1 Ref      |
| MT732471 | Unassigned | Unassigned | Unassigned | 1484_0 | Clustered           | 15 VC_1484_0 | 15  | 0.9981 | 1          | 0.9981 | 0 | 0 | 0 | 1 Ref      |
| MT732472 | Unassigned | Unassigned | Unassigned | 1484_0 | Clustered           | 15 VC_1484_0 | 15  | 0.9981 | 1          | 0.9981 | 0 | 0 | 0 | 1 Ref      |
| MT735629 | Unassigned | Unassigned | Unassigned | 935_0  | Clustered           | 6 VC_935_0   | 6   | 0.2317 | 1          | 0.2317 | 0 | 0 | 0 | 1 Ref      |
| MT740244 | Unassigned | Unassigned | Unassigned | 836_1  | Clustered           | 4 VC_836_1   | 4   | 0.2236 | 0.99998426 | 0.2236 | 0 | 0 | 0 | 1 Ref      |
| MT740291 | Unassigned | Unassigned | Unassigned | 654_0  | Clustered           | 115 VC_654_0 | 115 | 0.7303 | 1          | 0.7303 | 0 | 0 | 0 | 0.8764 Ref |
| MT740314 | Unassigned | Unassigned | Unassigned | 794_5  | Clustered/Singleton | 1 VC_794_5   | 1   | 0      | 1          | 0      | 0 | 0 | 0 | 1 Ref      |
| MT740726 | Unassigned | Unassigned | Unassigned | 1248_0 | Clustered           | 3 VC_1248_0  | 3   | 0.9195 | 0.99501814 | 0.9149 | 0 | 0 | 0 | 1 Ref      |
| MT740727 | Unassigned | Unassigned | Unassigned | 168_0  | Clustered           | 18 VC_168_0  | 18  | 0.7394 | 1          | 0.7394 | 0 | 0 | 0 | 0.8627 Ref |
| MT740728 | Unassigned | Unassigned | Unassigned | 71_0   | Clustered           | 27 VC_71_0   | 27  | 0.5964 | 1          | 0.5964 | 0 | 0 | 0 | 0.9943 Ref |
| MT740730 | Unassigned | Unassigned | Unassigned | 168_0  | Clustered           | 18 VC_168_0  | 18  | 0.7394 | 1          | 0.7394 | 0 | 0 | 0 | 0.8627 Ref |
| MT740731 | Unassigned | Unassigned | Unassigned | 168_0  | Clustered           | 18 VC_168_0  | 18  | 0.7394 | 1          | 0.7394 | 0 | 0 | 0 | 0.8627 Ref |
| MT740732 | Unassigned | Unassigned | Unassigned | 168_0  | Clustered           | 18 VC_168_0  | 18  | 0.7394 | 1          | 0.7394 | 0 | 0 | 0 | 0.8627 Ref |
| MT740733 | Unassigned | Unassigned | Unassigned | 168_0  | Clustered           | 18 VC_168_0  | 18  | 0.7394 | 1          | 0.7394 | 0 | 0 | 0 | 0.8627 Ref |
| MT740734 | Unassigned | Unassigned | Unassigned | 370_0  | Clustered           | 53 VC_370_0  | 53  | 0.8972 | 1          | 0.8972 | 0 | 0 | 0 | 1 Ref      |
| MT740736 | Unassigned | Unassigned | Unassigned | 168_0  | Clustered           | 18 VC_168_0  | 18  | 0.7394 | 1          | 0.7394 | 0 | 0 | 0 | 0.8627 Ref |
| MT740737 | Unassigned | Unassigned | Unassigned | 167_0  | Clustered           | 3 VC_167_0   | 3   | 0.5731 | 0.99804396 | 0.572  | 0 | 0 | 0 | 1 Ref      |
| MT740738 | Unassigned | Unassigned | Unassigned | 168_0  | Clustered           | 18 VC_168_0  | 18  | 0.7394 | 1          | 0.7394 | 0 | 0 | 0 | 0.8627 Ref |
| MT740739 | Unassigned | Unassigned | Unassigned | 168_0  | Clustered           | 18 VC_168_0  | 18  | 0.7394 | 1          | 0.7394 | 0 | 0 | 0 | 0.8627 Ref |
| MT740740 | Unassigned | Unassigned | Unassigned | 168_0  | Clustered           | 18 VC_168_0  | 18  | 0.7394 | 1          | 0.7394 | 0 | 0 | 0 | 0.8627 Ref |
| MT740741 | Unassigned | Unassigned | Unassigned | 167_0  | Clustered           | 3 VC_167_0   | 3   | 0.5731 | 0.99804396 | 0.572  | 0 | 0 | 0 | 1 Ref      |
| MT740742 | Unassigned | Unassigned | Unassigned | 168_0  | Clustered           | 18 VC_168_0  | 18  | 0.7394 | 1          | 0.7394 | 0 | 0 | 0 | 0.8627 Ref |
| MT740743 | Unassigned | Unassigned | Unassigned | 1248_0 | Clustered           | 3 VC_1248_0  | 3   | 0.9195 | 0.99501814 | 0.9149 | 0 | 0 | 0 | 1 Ref      |
| MT740745 | Unassigned | Unassigned | Unassigned | 1248_0 | Clustered           | 3 VC_1248_0  | 3   | 0.9195 | 0.99501814 | 0.9149 | 0 | 0 | 0 | 1 Ref      |
| MT741943 | Unassigned | Unassigned | Unassigned | 510_1  | Clustered           | 20 VC_510_1  | 20  | 0.4172 | 1          | 0.4172 | 0 | 0 | 0 | 1 Ref      |



|          |            |            |            |        |                     |              |    |        |            |        |   |   |   |            |
|----------|------------|------------|------------|--------|---------------------|--------------|----|--------|------------|--------|---|---|---|------------|
| MT741944 | Unassigned | Unassigned | Unassigned | 714_0  | Clustered           | 71 VC_714_0  | 71 | 0.935  | 1          | 0.935  | 0 | 0 | 0 | 1 Ref      |
| MT745954 | Unassigned | Unassigned | Unassigned | 719_0  | Clustered           | 16 VC_719_0  | 16 | 0.728  | 1          | 0.728  | 0 | 0 | 0 | 1 Ref      |
| MT745955 | Unassigned | Unassigned | Unassigned | 719_0  | Clustered           | 16 VC_719_0  | 16 | 0.728  | 1          | 0.728  | 0 | 0 | 0 | 1 Ref      |
| MT745956 | Unassigned | Unassigned | Unassigned | 719_0  | Clustered           | 16 VC_719_0  | 16 | 0.728  | 1          | 0.728  | 0 | 0 | 0 | 1 Ref      |
| MT747434 | Unassigned | Unassigned | Unassigned | 1003_0 | Clustered           | 16 VC_1003_0 | 16 | 0.8967 | 1          | 0.8967 | 0 | 0 | 0 | 1 Ref      |
| MT757392 | Unassigned | Unassigned | Unassigned | 125_0  | Clustered           | 23 VC_125_0  | 23 | 0.8163 | 1          | 0.8163 | 0 | 0 | 0 | 1 Ref      |
| MT757399 | Unassigned | Unassigned | Unassigned | 1003_0 | Clustered           | 16 VC_1003_0 | 16 | 0.8967 | 1          | 0.8967 | 0 | 0 | 0 | 1 Ref      |
| MT758688 | Unassigned | Unassigned | Unassigned | 917_0  | Clustered           | 28 VC_917_0  | 28 | 0.5465 | 1          | 0.5465 | 0 | 0 | 0 | 1 Ref      |
| MT758689 | Unassigned | Unassigned | Unassigned | 95_0   | Clustered           | 2 VC_95_0    | 2  | 0.1028 | 0.95671136 | 0.0984 | 0 | 0 | 0 | 1 Ref      |
| MT764206 | Unassigned | Unassigned | Unassigned | 290_80 | Clustered/Singleton | 1 VC_290_80  | 1  | 0      | 1          | 0      | 0 | 0 | 0 | 1 Ref      |
| MT764207 | Unassigned | Unassigned | Unassigned | 440_0  | Clustered           | 33 VC_440_0  | 33 | 0.992  | 1          | 0.992  | 0 | 0 | 0 | 1 Ref      |
| MT764208 | Unassigned | Unassigned | Unassigned | 609_0  | Clustered           | 27 VC_609_0  | 27 | 0.9943 | 1          | 0.9943 | 0 | 0 | 0 | 1 Ref      |
| MT767883 | Unassigned | Unassigned | Unassigned | 771_0  | Clustered           | 8 VC_771_0   | 8  | 0.7491 | 1          | 0.7491 | 0 | 0 | 0 | 1 Ref      |
| MT768059 | Unassigned | Unassigned | Unassigned | 440_0  | Clustered           | 33 VC_440_0  | 33 | 0.992  | 1          | 0.992  | 0 | 0 | 0 | 1 Ref      |
| MT768060 | Unassigned | Unassigned | Unassigned | 475_0  | Clustered           | 96 VC_475_0  | 96 | 0.9303 | 1          | 0.9303 | 0 | 0 | 0 | 0.9575 Ref |
| MT770738 | Unassigned | Unassigned | Unassigned | 739_0  | Clustered           | 3 VC_739_0   | 3  | 0.1567 | 0.99815158 | 0.1564 | 0 | 0 | 0 | 1 Ref      |
| MT771339 | Unassigned | Unassigned | Unassigned | 1201_0 | Clustered           | 2 VC_1201_0  | 2  | 0.0266 | 0.95737687 | 0.0254 | 0 | 0 | 0 | 1 Ref      |
| MT771340 | Unassigned | Unassigned | Unassigned | 335_59 | Clustered/Singleton | 1 VC_335_59  | 1  | 0      | 1          | 0      | 0 | 0 | 0 | 1 Ref      |
| MT771341 | Unassigned | Unassigned | Unassigned | 1218_0 | Clustered           | 14 VC_1218_0 | 14 | 0.7811 | 1          | 0.7811 | 0 | 0 | 0 | 0.989 Ref  |
| MT771342 | Unassigned | Unassigned | Unassigned | 1216_0 | Clustered           | 22 VC_1216_0 | 22 | 0.4546 | 1          | 0.4546 | 0 | 0 | 0 | 1 Ref      |
| MT771344 | Unassigned | Unassigned | Unassigned | 1424_0 | Clustered           | 31 VC_1424_0 | 31 | 0.8834 | 1          | 0.8834 | 0 | 0 | 0 | 1 Ref      |
| MT771345 | Unassigned | Unassigned | Unassigned | 590_0  | Clustered           | 9 VC_590_0   | 9  | 0.4952 | 1          | 0.4952 | 0 | 0 | 0 | 1 Ref      |
| MT771347 | Unassigned | Unassigned | Unassigned | 1084_0 | Clustered           | 2 VC_1084_0  | 2  | 0.0596 | 0.95667911 | 0.057  | 0 | 0 | 0 | 1 Ref      |
| MT771348 | Unassigned | Unassigned | Unassigned | 590_0  | Clustered           | 9 VC_590_0   | 9  | 0.4952 | 1          | 0.4952 | 0 | 0 | 0 | 1 Ref      |
| MT771350 | Unassigned | Unassigned | Unassigned | 1296_0 | Clustered           | 82 VC_1296_0 | 82 | 0.7938 | 1          | 0.7938 | 0 | 0 | 0 | 1 Ref      |
| MT774375 | Unassigned | Unassigned | Unassigned | 519_11 | Clustered           | 7 VC_519_11  | 7  | 0.2104 | 1          | 0.2104 | 0 | 0 | 0 | 0.7619 Ref |
| MT774376 | Unassigned | Unassigned | Unassigned | 519_11 | Clustered           | 7 VC_519_11  | 7  | 0.2104 | 1          | 0.2104 | 0 | 0 | 0 | 0.7619 Ref |
| MT774378 | Unassigned | Unassigned | Unassigned | 1054_1 | Clustered           | 8 VC_1054_1  | 8  | 0.3937 | 1          | 0.3937 | 0 | 0 | 0 | 0.9286 Ref |
| MT774379 | Unassigned | Unassigned | Unassigned | 519_10 | Clustered           | 2 VC_519_10  | 2  | 0.0437 | 0.9538552  | 0.0417 | 0 | 0 | 0 | 1 Ref      |
| MT774380 | Unassigned | Unassigned | Unassigned | 519_11 | Clustered           | 7 VC_519_11  | 7  | 0.2104 | 1          | 0.2104 | 0 | 0 | 0 | 0.7619 Ref |
| MT774381 | Unassigned | Unassigned | Unassigned | 691_0  | Clustered           | 18 VC_691_0  | 18 | 0.6865 | 1          | 0.6865 | 0 | 0 | 0 | 0.9477 Ref |
| MT774382 | Unassigned | Unassigned | Unassigned | 519_11 | Clustered           | 7 VC_519_11  | 7  | 0.2104 | 1          | 0.2104 | 0 | 0 | 0 | 0.7619 Ref |
| MT774383 | Unassigned | Unassigned | Unassigned | 691_0  | Clustered           | 18 VC_691_0  | 18 | 0.6865 | 1          | 0.6865 | 0 | 0 | 0 | 0.9477 Ref |
| MT774384 | Unassigned | Unassigned | Unassigned | 691_1  | Clustered           | 5 VC_691_1   | 5  | 0.1605 | 0.99999993 | 0.1605 | 0 | 0 | 0 | 0.8 Ref    |
| MT774385 | Unassigned | Unassigned | Unassigned | 1054_3 | Clustered/Singleton | 1 VC_1054_3  | 1  | 0      | 1          | 0      | 0 | 0 | 0 | 1 Ref      |
| MT774386 | Unassigned | Unassigned | Unassigned | 691_0  | Clustered           | 18 VC_691_0  | 18 | 0.6865 | 1          | 0.6865 | 0 | 0 | 0 | 0.9477 Ref |
| MT774387 | Unassigned | Unassigned | Unassigned | 1054_0 | Clustered           | 5 VC_1054_0  | 5  | 0.1894 | 0.99999402 | 0.1894 | 0 | 0 | 0 | 1 Ref      |
| MT774388 | Unassigned | Unassigned | Unassigned | 1054_1 | Clustered           | 8 VC_1054_1  | 8  | 0.3937 | 1          | 0.3937 | 0 | 0 | 0 | 0.9286 Ref |
| MT774389 | Unassigned | Unassigned | Unassigned | 1054_2 | Clustered           | 2 VC_1054_2  | 2  | 0.06   | 0.95033624 | 0.057  | 0 | 0 | 0 | 1 Ref      |
| MT774390 | Unassigned | Unassigned | Unassigned | 1054_0 | Clustered           | 5 VC_1054_0  | 5  | 0.1894 | 0.99999402 | 0.1894 | 0 | 0 | 0 | 1 Ref      |
| MT774391 | Unassigned | Unassigned | Unassigned | 1054_1 | Clustered           | 8 VC_1054_1  | 8  | 0.3937 | 1          | 0.3937 | 0 | 0 | 0 | 0.9286 Ref |
| MT774392 | Unassigned | Unassigned | Unassigned | 1054_0 | Clustered           | 5 VC_1054_0  | 5  | 0.1894 | 0.99999402 | 0.1894 | 0 | 0 | 0 | 1 Ref      |
| MT774393 | Unassigned | Unassigned | Unassigned | 693_0  | Clustered           | 4 VC_693_0   | 4  | 0.3    | 0.99997992 | 0.3    | 0 | 0 | 0 | 1 Ref      |
| MT774394 | Unassigned | Unassigned | Unassigned | 691_1  | Clustered           | 5 VC_691_1   | 5  | 0.1605 | 0.99999993 | 0.1605 | 0 | 0 | 0 | 0.8 Ref    |
| MT774395 | Unassigned | Unassigned | Unassigned | 519_6  | Clustered           | 2 VC_519_6   | 2  | 0.031  | 0.93818925 | 0.0291 | 0 | 0 | 0 | 1 Ref      |
| MT774396 | Unassigned | Unassigned | Unassigned | 519_12 | Clustered/Singleton | 1 VC_519_12  | 1  | 0      | 1          | 0      | 0 | 0 | 0 | 1 Ref      |
| MT774397 | Unassigned | Unassigned | Unassigned | 519_5  | Clustered           | 2 VC_519_5   | 2  | 0.0476 | 0.95398212 | 0.0454 | 0 | 0 | 0 | 1 Ref      |
| MT774398 | Unassigned | Unassigned | Unassigned | 519_9  | Clustered/Singleton | 1 VC_519_9   | 1  | 0      | 1          | 0      | 0 | 0 | 0 | 1 Ref      |
| MT774399 | Unassigned | Unassigned | Unassigned | 519_8  | Clustered           | 2 VC_519_8   | 2  | 0.044  | 0.95144654 | 0.0418 | 0 | 0 | 0 | 1 Ref      |
| MT774400 | Unassigned | Unassigned | Unassigned | 519_4  | Clustered/Singleton | 1 VC_519_4   | 1  | 0      | 1          | 0      | 0 | 0 | 0 | 1 Ref      |
| MT774403 | Unassigned | Unassigned | Unassigned | 519_8  | Clustered           | 2 VC_519_8   | 2  | 0.044  | 0.95144654 | 0.0418 | 0 | 0 | 0 | 1 Ref      |
| MT774404 | Unassigned | Unassigned | Unassigned | 519_3  | Clustered/Singleton | 1 VC_519_3   | 1  | 0      | 1          | 0      | 0 | 0 | 0 | 1 Ref      |
| MT774405 | Unassigned | Unassigned | Unassigned | 519_1  | Clustered/Singleton | 1 VC_519_1   | 1  | 0      | 1          | 0      | 0 | 0 | 0 | 1 Ref      |
| MT774407 | Unassigned | Unassigned | Unassigned | 519_2  | Clustered           | 2 VC_519_2   | 2  | 0.0443 | 0.94893696 | 0.042  | 0 | 0 | 0 | 1 Ref      |
| MT774408 | Unassigned | Unassigned | Unassigned | 520_0  | Clustered           | 2 VC_520_0   | 2  | 0.0616 | 0.9538552  | 0.0588 | 0 | 0 | 0 | 1 Ref      |
| MT774409 | Unassigned | Unassigned | Unassigned | 520_0  | Clustered           | 2 VC_520_0   | 2  | 0.0616 | 0.9538552  | 0.0588 | 0 | 0 | 0 | 1 Ref      |
| MT774410 | Unassigned | Unassigned | Unassigned | 520_1  | Clustered           | 2 VC_520_1   | 2  | 0.0799 | 0.95386066 | 0.0762 | 0 | 0 | 0 | 1 Ref      |
| MT774411 | Unassigned | Unassigned | Unassigned | 520_1  | Clustered           | 2 VC_520_1   | 2  | 0.0799 | 0.95386066 | 0.0762 | 0 | 0 | 0 | 1 Ref      |
| MT774487 | Unassigned | Unassigned | Unassigned | 30_1   | Clustered           | 53 VC_30_1   | 53 | 0.7151 | 1          | 0.7151 | 0 | 0 | 0 | 0.9325 Ref |
| MT776806 | Unassigned | Unassigned | Unassigned | 591_0  | Clustered           | 4 VC_591_0   | 4  | 0.1897 | 0.9999859  | 0.1897 | 0 | 0 | 0 | 1 Ref      |
| MT776807 | Unassigned | Unassigned | Unassigned | 1407_0 | Clustered           | 78 VC_1407_0 | 78 | 0.9731 | 1          | 0.9731 | 0 | 0 | 0 | 1 Ref      |
| MT776808 | Unassigned | Unassigned | Unassigned | 952_0  | Clustered           | 39 VC_952_0  | 39 | 0.9064 | 1          | 0.9064 | 0 | 0 | 0 | 1 Ref      |
| MT776809 | Unassigned | Unassigned | Unassigned | 952_0  | Clustered           | 39 VC_952_0  | 39 | 0.9064 | 1          | 0.9064 | 0 | 0 | 0 | 1 Ref      |
| MT776810 | Unassigned | Unassigned | Unassigned | 952_0  | Clustered           | 39 VC_952_0  | 39 | 0.9064 | 1          | 0.9064 | 0 | 0 | 0 | 1 Ref      |
| MT776811 | Unassigned | Unassigned | Unassigned | 1116_0 | Clustered           | 24 VC_1116_0 | 24 | 0.8376 | 1          | 0.8376 | 0 | 0 | 0 | 1 Ref      |
| MT776812 | Unassigned | Unassigned | Unassigned | 335_51 | Clustered           | 3 VC_335_51  | 3  | 0.008  | 0.99634936 | 0.008  | 0 | 0 | 0 | 0.6667 Ref |
| MT776813 | Unassigned | Unassigned | Unassigned | 384_9  | Clustered           | 4 VC_384_9   | 4  | 0.0109 | 0.99997666 | 0.0109 | 0 | 0 | 0 | 0.6667 Ref |
| MT777452 | Unassigned | Unassigned | Unassigned | 843_0  | Clustered           | 20 VC_843_0  | 20 | 0.9621 | 1          | 0.9621 | 0 | 0 | 0 | 1 Ref      |
| MT778837 | Unassigned | Unassigned | Unassigned | 1093_3 | Clustered           | 5 VC_1093_3  | 5  | 0.1846 | 0.98656422 | 0.1822 | 0 | 0 | 0 | 1 Ref      |
| MT778838 | Unassigned | Unassigned | Unassigned | 739_0  | Clustered           | 3 VC_739_0   | 3  | 0.1567 | 0.99815158 | 0.1564 | 0 | 0 | 0 | 1 Ref      |
| MT778839 | Unassigned | Unassigned | Unassigned | 1093_3 | Clustered           | 5 VC_1093_3  | 5  | 0.1846 | 0.98656422 | 0.1822 | 0 | 0 | 0 | 1 Ref      |
| MT778840 | Unassigned | Unassigned | Unassigned | 1023_0 | Clustered           | 3 VC_1023_0  | 3  | 0.6263 | 0.99819562 | 0.6252 | 0 | 0 | 0 | 1 Ref      |
| MT782071 | Unassigned | Unassigned | Unassigned | 293_13 | Clustered           | 10 VC_293_13 | 10 | 0.0698 | 0.99999931 | 0.0698 | 0 | 0 | 0 | 0.9556 Ref |
| MT786458 | Unassigned | Unassigned | Unassigned | 155_15 | Clustered           | 16 VC_155_15 | 16 | 0.0779 | 1          | 0.0779 | 0 | 0 | 0 | 0.8083 Ref |
| MT787017 | Unassigned | Unassigned | Unassigned | 155_3  | Clustered/Singleton | 1 VC_155_3   | 1  | 0      | 1          | 0      | 0 | 0 | 0 | 1 Ref      |
| MT795651 | Unassigned | Unassigned | Unassigned | 821_0  | Clustered           | 5 VC_821_0   | 5  | 0.2385 | 0.99999997 | 0.2385 | 0 | 0 | 0 | 1 Ref      |
| MT799840 | Unassigned | Unassigned | Unassigned | 994_5  | Clustered           | 19 VC_994_5  | 19 | 0.2622 | 1          | 0.2622 | 0 | 0 | 0 | 1 Ref      |
| MT806185 | Unassigned | Unassigned | Unassigned | 1044_0 | Clustered           | 5 VC_1044_0  | 5  | 0.757  | 0.99999838 | 0.757  | 0 | 0 | 0 | 1 Ref      |
| MT806186 | Unassigned | Unassigned | Unassigned | 1044_0 | Clustered           | 5 VC_1044_0  | 5  | 0.757  | 0.99999838 | 0.757  | 0 | 0 | 0 | 1 Ref      |
| MT808983 | Unassigned | Unassigned | Unassigned | 465_0  | Clustered           | 80 VC_465_0  | 80 | 0.9988 | 1          | 0.9988 | 0 | 0 | 0 | 1 Ref      |
| MT811961 | Unassigned | Unassigned | Unassigned | 358_1  | Clustered           | 2 VC_358_1   | 2  | 0.1209 | 0.95360882 | 0.1153 | 0 | 0 | 0 | 1 Ref      |



|          |            |            |            |         |                     |              |     |        |            |        |   |   |   |            |
|----------|------------|------------|------------|---------|---------------------|--------------|-----|--------|------------|--------|---|---|---|------------|
| MT813140 | Unassigned | Unassigned | Unassigned | 848_0   | Clustered           | 124 VC_848_0 | 124 | 0.9484 | 1          | 0.9484 | 0 | 0 | 0 | 1 Ref      |
| MT813141 | Unassigned | Unassigned | Unassigned | 848_0   | Clustered           | 124 VC_848_0 | 124 | 0.9484 | 1          | 0.9484 | 0 | 0 | 0 | 1 Ref      |
| MT813142 | Unassigned | Unassigned | Unassigned | 398_0   | Clustered           | 51 VC_398_0  | 51  | 0.8741 | 1          | 0.8741 | 0 | 0 | 0 | 1 Ref      |
| MT813197 | Unassigned | Unassigned | Unassigned | 32_1    | Clustered           | 16 VC_32_1   | 16  | 0.1962 | 1          | 0.1962 | 0 | 0 | 0 | 0.8333 Ref |
| MT818415 | Unassigned | Unassigned | Unassigned | 1415_0  | Clustered           | 31 VC_1415_0 | 31  | 0.8456 | 1          | 0.8456 | 0 | 0 | 0 | 1 Ref      |
| MT818416 | Unassigned | Unassigned | Unassigned | 579_29  | Clustered/Singleton | 1 VC_579_29  | 1   | 0      | 1          | 0      | 0 | 0 | 0 | 1 Ref      |
| MT818417 | Unassigned | Unassigned | Unassigned | 535_1   | Clustered           | 108 VC_535_1 | 108 | 0.8479 | 1          | 0.8479 | 0 | 0 | 0 | 0.9955 Ref |
| MT818418 | Unassigned | Unassigned | Unassigned | 577_0   | Clustered           | 21 VC_577_0  | 21  | 0.9908 | 1          | 0.9908 | 0 | 0 | 0 | 1 Ref      |
| MT818419 | Unassigned | Unassigned | Unassigned | 385_0   | Clustered           | 24 VC_385_0  | 24  | 0.5516 | 1          | 0.5516 | 0 | 0 | 0 | 1 Ref      |
| MT818420 | Unassigned | Unassigned | Unassigned | 1406_0  | Clustered           | 21 VC_1406_0 | 21  | 0.9836 | 1          | 0.9836 | 0 | 0 | 0 | 1 Ref      |
| MT818421 | Unassigned | Unassigned | Unassigned | 834_0   | Clustered           | 18 VC_834_0  | 18  | 0.9116 | 1          | 0.9116 | 0 | 0 | 0 | 1 Ref      |
| MT818422 | Unassigned | Unassigned | Unassigned | 783_0   | Clustered           | 67 VC_783_0  | 67  | 0.8945 | 1          | 0.8945 | 0 | 0 | 0 | 1 Ref      |
| MT818423 | Unassigned | Unassigned | Unassigned | 579_35  | Clustered/Singleton | 1 VC_579_35  | 1   | 0      | 1          | 0      | 0 | 0 | 0 | 1 Ref      |
| MT818424 | Unassigned | Unassigned | Unassigned | 1216_0  | Clustered           | 22 VC_1216_0 | 22  | 0.4546 | 1          | 0.4546 | 0 | 0 | 0 | 1 Ref      |
| MT818425 | Unassigned | Unassigned | Unassigned | 577_0   | Clustered           | 21 VC_577_0  | 21  | 0.9908 | 1          | 0.9908 | 0 | 0 | 0 | 1 Ref      |
| MT818426 | Unassigned | Unassigned | Unassigned | 1083_0  | Clustered           | 4 VC_1083_0  | 4   | 0.8577 | 0.99997306 | 0.8576 | 0 | 0 | 0 | 1 Ref      |
| MT818427 | Unassigned | Unassigned | Unassigned | 1287_0  | Clustered           | 44 VC_1287_0 | 44  | 1      | 1          | 1      | 0 | 0 | 0 | 1 Ref      |
| MT822284 | Unassigned | Unassigned | Unassigned | 408_0   | Clustered           | 5 VC_408_0   | 5   | 0.1003 | 0.99999998 | 0.1003 | 0 | 0 | 0 | 1 Ref      |
| MT822285 | Unassigned | Unassigned | Unassigned | 408_0   | Clustered           | 5 VC_408_0   | 5   | 0.1003 | 0.99999998 | 0.1003 | 0 | 0 | 0 | 1 Ref      |
| MT822286 | Unassigned | Unassigned | Unassigned | 408_0   | Clustered           | 5 VC_408_0   | 5   | 0.1003 | 0.99999998 | 0.1003 | 0 | 0 | 0 | 1 Ref      |
| MT822287 | Unassigned | Unassigned | Unassigned | 408_0   | Clustered           | 5 VC_408_0   | 5   | 0.1003 | 0.99999998 | 0.1003 | 0 | 0 | 0 | 1 Ref      |
| MT822288 | Unassigned | Unassigned | Unassigned | 406_0   | Clustered           | 7 VC_406_0   | 7   | 0.176  | 1          | 0.176  | 0 | 0 | 0 | 1 Ref      |
| MT828551 | Unassigned | Unassigned | Unassigned | 290_34  | Clustered           | 4 VC_290_34  | 4   | 0.0081 | 0.9997166  | 0.0081 | 0 | 0 | 0 | 1 Ref      |
| MT828552 | Unassigned | Unassigned | Unassigned | 290_23  | Clustered/Singleton | 1 VC_290_23  | 1   | 0      | 1          | 0      | 0 | 0 | 0 | 1 Ref      |
| MT828553 | Unassigned | Unassigned | Unassigned | 290_34  | Clustered           | 4 VC_290_34  | 4   | 0.0081 | 0.9997166  | 0.0081 | 0 | 0 | 0 | 1 Ref      |
| MT829326 | Unassigned | Unassigned | Unassigned | 711_0   | Clustered           | 48 VC_711_0  | 48  | 0.8217 | 1          | 0.8217 | 0 | 0 | 0 | 1 Ref      |
| MT830620 | Unassigned | Unassigned | Unassigned | 322_0   | Clustered           | 12 VC_322_0  | 12  | 0.8924 | 1          | 0.8924 | 0 | 0 | 0 | 1 Ref      |
| MT833282 | Unassigned | Unassigned | Unassigned | 340_18  | Clustered           | 7 VC_340_18  | 7   | 0.0326 | 1          | 0.0326 | 0 | 0 | 0 | 0.8095 Ref |
| MT833283 | Unassigned | Unassigned | Unassigned | 199_18  | Clustered           | 2 VC_199_18  | 2   | 0.0057 | 0.91687119 | 0.0052 | 0 | 0 | 0 | 0 Ref      |
| MT833387 | Unassigned | Unassigned | Unassigned | 32_1    | Clustered           | 16 VC_32_1   | 16  | 0.1962 | 1          | 0.1962 | 0 | 0 | 0 | 0.8333 Ref |
| MT843274 | Unassigned | Unassigned | Unassigned | 198_20  | Clustered           | 4 VC_198_20  | 4   | 0.0227 | 0.99997722 | 0.0227 | 0 | 0 | 0 | 1 Ref      |
| MT843275 | Unassigned | Unassigned | Unassigned | 424_0   | Clustered           | 3 VC_424_0   | 3   | 0.1264 | 0.96632884 | 0.1222 | 0 | 0 | 0 | 1 Ref      |
| MT856905 | Unassigned | Unassigned | Unassigned | 94_0    | Clustered           | 22 VC_94_0   | 22  | 0.5602 | 1          | 0.5602 | 0 | 0 | 0 | 1 Ref      |
| MT857001 | Unassigned | Unassigned | Unassigned | 711_0   | Clustered           | 48 VC_711_0  | 48  | 0.8217 | 1          | 0.8217 | 0 | 0 | 0 | 1 Ref      |
| MT857002 | Unassigned | Unassigned | Unassigned | 133_3   | Clustered/Singleton | 1 VC_133_3   | 1   | 0      | 1          | 0      | 0 | 0 | 0 | 1 Ref      |
| MT862763 | Unassigned | Unassigned | Unassigned | 465_0   | Clustered           | 80 VC_465_0  | 80  | 0.9988 | 1          | 0.9988 | 0 | 0 | 0 | 1 Ref      |
| MT863714 | Unassigned | Unassigned | Unassigned | 868_0   | Clustered           | 27 VC_868_0  | 27  | 0.9372 | 1          | 0.9372 | 0 | 0 | 0 | 1 Ref      |
| MT863715 | Unassigned | Unassigned | Unassigned | 868_0   | Clustered           | 27 VC_868_0  | 27  | 0.9372 | 1          | 0.9372 | 0 | 0 | 0 | 1 Ref      |
| MT863716 | Unassigned | Unassigned | Unassigned | 868_0   | Clustered           | 27 VC_868_0  | 27  | 0.9372 | 1          | 0.9372 | 0 | 0 | 0 | 1 Ref      |
| MT863717 | Unassigned | Unassigned | Unassigned | 868_0   | Clustered           | 27 VC_868_0  | 27  | 0.9372 | 1          | 0.9372 | 0 | 0 | 0 | 1 Ref      |
| MT863718 | Unassigned | Unassigned | Unassigned | 868_0   | Clustered           | 27 VC_868_0  | 27  | 0.9372 | 1          | 0.9372 | 0 | 0 | 0 | 1 Ref      |
| MT863719 | Unassigned | Unassigned | Unassigned | 868_0   | Clustered           | 27 VC_868_0  | 27  | 0.9372 | 1          | 0.9372 | 0 | 0 | 0 | 1 Ref      |
| MT863720 | Unassigned | Unassigned | Unassigned | 868_0   | Clustered           | 27 VC_868_0  | 27  | 0.9372 | 1          | 0.9372 | 0 | 0 | 0 | 1 Ref      |
| MT863721 | Unassigned | Unassigned | Unassigned | 868_0   | Clustered           | 27 VC_868_0  | 27  | 0.9372 | 1          | 0.9372 | 0 | 0 | 0 | 1 Ref      |
| MT863722 | Unassigned | Unassigned | Unassigned | 868_0   | Clustered           | 27 VC_868_0  | 27  | 0.9372 | 1          | 0.9372 | 0 | 0 | 0 | 1 Ref      |
| MT863723 | Unassigned | Unassigned | Unassigned | 868_0   | Clustered           | 27 VC_868_0  | 27  | 0.9372 | 1          | 0.9372 | 0 | 0 | 0 | 1 Ref      |
| MT863724 | Unassigned | Unassigned | Unassigned | 868_0   | Clustered           | 27 VC_868_0  | 27  | 0.9372 | 1          | 0.9372 | 0 | 0 | 0 | 1 Ref      |
| MT863725 | Unassigned | Unassigned | Unassigned | 868_0   | Clustered           | 27 VC_868_0  | 27  | 0.9372 | 1          | 0.9372 | 0 | 0 | 0 | 1 Ref      |
| MT863726 | Unassigned | Unassigned | Unassigned | 868_0   | Clustered           | 27 VC_868_0  | 27  | 0.9372 | 1          | 0.9372 | 0 | 0 | 0 | 1 Ref      |
| MT863727 | Unassigned | Unassigned | Unassigned | 868_0   | Clustered           | 27 VC_868_0  | 27  | 0.9372 | 1          | 0.9372 | 0 | 0 | 0 | 1 Ref      |
| MT863728 | Unassigned | Unassigned | Unassigned | 868_0   | Clustered           | 27 VC_868_0  | 27  | 0.9372 | 1          | 0.9372 | 0 | 0 | 0 | 1 Ref      |
| MT863729 | Unassigned | Unassigned | Unassigned | 868_0   | Clustered           | 27 VC_868_0  | 27  | 0.9372 | 1          | 0.9372 | 0 | 0 | 0 | 1 Ref      |
| MT863730 | Unassigned | Unassigned | Unassigned | 868_0   | Clustered           | 27 VC_868_0  | 27  | 0.9372 | 1          | 0.9372 | 0 | 0 | 0 | 1 Ref      |
| MT863731 | Unassigned | Unassigned | Unassigned | 868_0   | Clustered           | 27 VC_868_0  | 27  | 0.9372 | 1          | 0.9372 | 0 | 0 | 0 | 1 Ref      |
| MT880872 | Unassigned | Unassigned | Unassigned | 220_0   | Clustered           | 2 VC_220_0   | 2   | 0.491  | 0.9528045  | 0.4678 | 0 | 0 | 0 | 1 Ref      |
| MT884006 | Unassigned | Unassigned | Unassigned | 290_184 | Clustered           | 2 VC_290_184 | 2   | 0.0025 | 0.92978205 | 0.0023 | 0 | 0 | 0 | 1 Ref      |
| MT884007 | Unassigned | Unassigned | Unassigned | 290_184 | Clustered           | 2 VC_290_184 | 2   | 0.0025 | 0.92978205 | 0.0023 | 0 | 0 | 0 | 1 Ref      |
| MT884008 | Unassigned | Unassigned | Unassigned | 794_10  | Clustered           | 8 VC_794_10  | 8   | 0.0433 | 0.9088183  | 0.0394 | 0 | 0 | 0 | 0.9286 Ref |
| MT884009 | Unassigned | Unassigned | Unassigned | 794_10  | Clustered           | 8 VC_794_10  | 8   | 0.0433 | 0.9088183  | 0.0394 | 0 | 0 | 0 | 0.9286 Ref |
| MT884010 | Unassigned | Unassigned | Unassigned | 794_10  | Clustered           | 8 VC_794_10  | 8   | 0.0433 | 0.9088183  | 0.0394 | 0 | 0 | 0 | 0.9286 Ref |
| MT884011 | Unassigned | Unassigned | Unassigned | 794_10  | Clustered           | 8 VC_794_10  | 8   | 0.0433 | 0.9088183  | 0.0394 | 0 | 0 | 0 | 0.9286 Ref |
| MT884012 | Unassigned | Unassigned | Unassigned | 859_0   | Clustered           | 67 VC_859_0  | 67  | 0.9622 | 1          | 0.9622 | 0 | 0 | 0 | 1 Ref      |
| MT884013 | Unassigned | Unassigned | Unassigned | 859_0   | Clustered           | 67 VC_859_0  | 67  | 0.9622 | 1          | 0.9622 | 0 | 0 | 0 | 1 Ref      |
| MT884014 | Unassigned | Unassigned | Unassigned | 859_0   | Clustered           | 67 VC_859_0  | 67  | 0.9622 | 1          | 0.9622 | 0 | 0 | 0 | 1 Ref      |
| MT884015 | Unassigned | Unassigned | Unassigned | 859_0   | Clustered           | 67 VC_859_0  | 67  | 0.9622 | 1          | 0.9622 | 0 | 0 | 0 | 1 Ref      |
| MT887289 | Unassigned | Unassigned | Unassigned | 340_18  | Clustered           | 7 VC_340_18  | 7   | 0.0326 | 1          | 0.0326 | 0 | 0 | 0 | 0.8095 Ref |
| MT889364 | Unassigned | Unassigned | Unassigned | 1427_0  | Clustered           | 6 VC_1427_0  | 6   | 1      | 1          | 1      | 0 | 0 | 0 | 1 Ref      |
| MT889365 | Unassigned | Unassigned | Unassigned | 1287_0  | Clustered           | 44 VC_1287_0 | 44  | 1      | 1          | 1      | 0 | 0 | 0 | 1 Ref      |
| MT889366 | Unassigned | Unassigned | Unassigned | 1250_0  | Clustered           | 29 VC_1250_0 | 29  | 0.822  | 1          | 0.822  | 0 | 0 | 0 | 1 Ref      |
| MT889367 | Unassigned | Unassigned | Unassigned | 952_0   | Clustered           | 39 VC_952_0  | 39  | 0.9064 | 1          | 0.9064 | 0 | 0 | 0 | 1 Ref      |
| MT889368 | Unassigned | Unassigned | Unassigned | 895_0   | Clustered           | 25 VC_895_0  | 25  | 0.5768 | 1          | 0.5768 | 0 | 0 | 0 | 1 Ref      |
| MT889369 | Unassigned | Unassigned | Unassigned | 384_9   | Clustered           | 4 VC_384_9   | 4   | 0.0109 | 0.99997666 | 0.0109 | 0 | 0 | 0 | 0.6667 Ref |
| MT889370 | Unassigned | Unassigned | Unassigned | 895_0   | Clustered           | 25 VC_895_0  | 25  | 0.5768 | 1          | 0.5768 | 0 | 0 | 0 | 1 Ref      |
| MT889371 | Unassigned | Unassigned | Unassigned | 1413_0  | Clustered           | 2 VC_1413_0  | 2   | 0.1621 | 0.95304852 | 0.1545 | 0 | 0 | 0 | 1 Ref      |
| MT889372 | Unassigned | Unassigned | Unassigned | 1287_0  | Clustered           | 44 VC_1287_0 | 44  | 1      | 1          | 1      | 0 | 0 | 0 | 1 Ref      |
| MT889373 | Unassigned | Unassigned | Unassigned | 1207_0  | Clustered           | 20 VC_1207_0 | 20  | 0.9898 | 1          | 0.9898 | 0 | 0 | 0 | 1 Ref      |
| MT889374 | Unassigned | Unassigned | Unassigned | 538_1   | Clustered/Singleton | 1 VC_538_1   | 1   | 0      | 1          | 0      | 0 | 0 | 0 | 1 Ref      |
| MT889375 | Unassigned | Unassigned | Unassigned | 1250_0  | Clustered           | 29 VC_1250_0 | 29  | 0.822  | 1          | 0.822  | 0 | 0 | 0 | 1 Ref      |
| MT889376 | Unassigned | Unassigned | Unassigned | 1250_0  | Clustered           | 29 VC_1250_0 | 29  | 0.822  | 1          | 0.822  | 0 | 0 | 0 | 1 Ref      |
| MT889378 | Unassigned | Unassigned | Unassigned | 952_0   | Clustered           | 39 VC_952_0  | 39  | 0.9064 | 1          | 0.9064 | 0 | 0 | 0 | 1 Ref      |
| MT889379 | Unassigned | Unassigned | Unassigned | 895_0   | Clustered           | 25 VC_895_0  | 25  | 0.5768 | 1          | 0.5768 | 0 | 0 | 0 | 1 Ref      |



|          |            |            |            |         |                     |              |     |        |            |        |   |   |   |            |
|----------|------------|------------|------------|---------|---------------------|--------------|-----|--------|------------|--------|---|---|---|------------|
| MT889381 | Unassigned | Unassigned | Unassigned | 385_1   | Clustered           | 9 VC_385_1   | 9   | 0.1928 | 1          | 0.1928 | 0 | 0 | 0 | 1 Ref      |
| MT889382 | Unassigned | Unassigned | Unassigned | 535_1   | Clustered           | 108 VC_535_1 | 108 | 0.8479 | 1          | 0.8479 | 0 | 0 | 0 | 0.9955 Ref |
| MT889383 | Unassigned | Unassigned | Unassigned | 918_0   | Clustered           | 16 VC_918_0  | 16  | 0.2945 | 1          | 0.2945 | 0 | 0 | 0 | 1 Ref      |
| MT889384 | Unassigned | Unassigned | Unassigned | 335_14  | Clustered           | 3 VC_335_14  | 3   | 0.0094 | 0.9985917  | 0.0094 | 0 | 0 | 0 | 1 Ref      |
| MT889385 | Unassigned | Unassigned | Unassigned | 585_0   | Clustered           | 20 VC_585_0  | 20  | 0.8376 | 1          | 0.8376 | 0 | 0 | 0 | 1 Ref      |
| MT889386 | Unassigned | Unassigned | Unassigned | 535_1   | Clustered           | 108 VC_535_1 | 108 | 0.8479 | 1          | 0.8479 | 0 | 0 | 0 | 0.9955 Ref |
| MT889388 | Unassigned | Unassigned | Unassigned | 1116_0  | Clustered           | 24 VC_1116_0 | 24  | 0.8376 | 1          | 0.8376 | 0 | 0 | 0 | 1 Ref      |
| MT889389 | Unassigned | Unassigned | Unassigned | 1287_0  | Clustered           | 44 VC_1287_0 | 44  | 1      | 1          | 1      | 0 | 0 | 0 | 1 Ref      |
| MT889390 | Unassigned | Unassigned | Unassigned | 535_1   | Clustered           | 108 VC_535_1 | 108 | 0.8479 | 1          | 0.8479 | 0 | 0 | 0 | 0.9955 Ref |
| MT889391 | Unassigned | Unassigned | Unassigned | 918_0   | Clustered           | 16 VC_918_0  | 16  | 0.2945 | 1          | 0.2945 | 0 | 0 | 0 | 1 Ref      |
| MT889392 | Unassigned | Unassigned | Unassigned | 1287_0  | Clustered           | 44 VC_1287_0 | 44  | 1      | 1          | 1      | 0 | 0 | 0 | 1 Ref      |
| MT889393 | Unassigned | Unassigned | Unassigned | 789_0   | Clustered           | 34 VC_789_0  | 34  | 0.9167 | 1          | 0.9167 | 0 | 0 | 0 | 1 Ref      |
| MT889394 | Unassigned | Unassigned | Unassigned | 1211_0  | Clustered           | 3 VC_1211_0  | 3   | 0.3232 | 0.99834213 | 0.3227 | 0 | 0 | 0 | 1 Ref      |
| MT889395 | Unassigned | Unassigned | Unassigned | 579_11  | Clustered           | 2 VC_579_11  | 2   | 0.0032 | 0.76766997 | 0.0025 | 0 | 0 | 0 | 1 Ref      |
| MT889396 | Unassigned | Unassigned | Unassigned | 538_92  | Clustered           | 5 VC_538_92  | 5   | 0.0653 | 0.99999997 | 0.0653 | 0 | 0 | 0 | 1 Ref      |
| MT889397 | Unassigned | Unassigned | Unassigned | 538_92  | Clustered           | 5 VC_538_92  | 5   | 0.0653 | 0.99999997 | 0.0653 | 0 | 0 | 0 | 1 Ref      |
| MT889398 | Unassigned | Unassigned | Unassigned | 543_0   | Clustered           | 25 VC_543_0  | 25  | 0.4584 | 1          | 0.4584 | 0 | 0 | 0 | 1 Ref      |
| MT894004 | Unassigned | Unassigned | Unassigned | 125_0   | Clustered           | 23 VC_125_0  | 23  | 0.8163 | 1          | 0.8163 | 0 | 0 | 0 | 1 Ref      |
| MT894005 | Unassigned | Unassigned | Unassigned | 972_0   | Clustered           | 99 VC_972_0  | 99  | 0.9113 | 1          | 0.9113 | 0 | 0 | 0 | 0.9928 Ref |
| MT897901 | Unassigned | Unassigned | Unassigned | 384_18  | Clustered           | 10 VC_384_18 | 10  | 0.0301 | 1          | 0.0301 | 0 | 0 | 0 | 0.8 Ref    |
| MT897902 | Unassigned | Unassigned | Unassigned | 384_3   | Clustered           | 22 VC_384_3  | 22  | 0.0786 | 1          | 0.0786 | 0 | 0 | 0 | 0.9048 Ref |
| MT897903 | Unassigned | Unassigned | Unassigned | 384_0   | Clustered           | 2 VC_384_0   | 2   | 0.0032 | 0.9473459  | 0.003  | 0 | 0 | 0 | 1 Ref      |
| MT897904 | Unassigned | Unassigned | Unassigned | 538_50  | Clustered/Singleton | 1 VC_538_50  | 1   | 0      | 1          | 0      | 0 | 0 | 0 | 1 Ref      |
| MT897905 | Unassigned | Unassigned | Unassigned | 1114_2  | Clustered           | 5 VC_1114_2  | 5   | 0.0531 | 0.99997362 | 0.0531 | 0 | 0 | 0 | 0.9 Ref    |
| MT897906 | Unassigned | Unassigned | Unassigned | 1250_0  | Clustered           | 29 VC_1250_0 | 29  | 0.822  | 1          | 0.822  | 0 | 0 | 0 | 1 Ref      |
| MT897907 | Unassigned | Unassigned | Unassigned | 532_0   | Clustered           | 75 VC_532_0  | 75  | 0.9393 | 1          | 0.9393 | 0 | 0 | 0 | 1 Ref      |
| MT897908 | Unassigned | Unassigned | Unassigned | 885_0   | Clustered           | 9 VC_885_0   | 9   | 0.9403 | 1          | 0.9403 | 0 | 0 | 0 | 1 Ref      |
| MT897909 | Unassigned | Unassigned | Unassigned | 384_16  | Clustered           | 42 VC_384_16 | 42  | 0.134  | 1          | 0.134  | 0 | 0 | 0 | 0.7282 Ref |
| MT897910 | Unassigned | Unassigned | Unassigned | 385_0   | Clustered           | 24 VC_385_0  | 24  | 0.5516 | 1          | 0.5516 | 0 | 0 | 0 | 1 Ref      |
| MT899443 | Unassigned | Unassigned | Unassigned | 745_0   | Clustered           | 9 VC_745_0   | 9   | 0.9955 | 0.99999771 | 0.9955 | 0 | 0 | 0 | 1 Ref      |
| MT899444 | Unassigned | Unassigned | Unassigned | 745_0   | Clustered           | 9 VC_745_0   | 9   | 0.9955 | 0.99999771 | 0.9955 | 0 | 0 | 0 | 1 Ref      |
| MT899504 | Unassigned | Unassigned | Unassigned | 8_0     | Clustered           | 58 VC_8_0    | 58  | 0.8285 | 1          | 0.8285 | 0 | 0 | 0 | 0.9946 Ref |
| MT900487 | Unassigned | Unassigned | Unassigned | 344_0   | Clustered           | 30 VC_344_0  | 30  | 0.523  | 1          | 0.523  | 0 | 0 | 0 | 0.9954 Ref |
| MT900488 | Unassigned | Unassigned | Unassigned | 425_0   | Clustered           | 40 VC_425_0  | 40  | 0.8399 | 1          | 0.8399 | 0 | 0 | 0 | 0.9974 Ref |
| MT902335 | Unassigned | Unassigned | Unassigned | 433_0   | Clustered           | 5 VC_433_0   | 5   | 0.2526 | 0.99999998 | 0.2526 | 0 | 0 | 0 | 1 Ref      |
| MT909815 | Unassigned | Unassigned | Unassigned | 94_0    | Clustered           | 22 VC_94_0   | 22  | 0.5602 | 1          | 0.5602 | 0 | 0 | 0 | 1 Ref      |
| MT920315 | Unassigned | Unassigned | Unassigned | 508_6   | Clustered/Singleton | 1 VC_508_6   | 1   | 0      | 1          | 0      | 0 | 0 | 0 | 1 Ref      |
| MT926124 | Unassigned | Unassigned | Unassigned | 98_0    | Clustered           | 30 VC_98_0   | 30  | 0.7175 | 1          | 0.7175 | 0 | 0 | 0 | 1 Ref      |
| MT932211 | Unassigned | Unassigned | Unassigned | 872_0   | Clustered           | 28 VC_872_0  | 28  | 0.7887 | 1          | 0.7887 | 0 | 0 | 0 | 1 Ref      |
| MT932212 | Unassigned | Unassigned | Unassigned | 30_1    | Clustered           | 53 VC_30_1   | 53  | 0.7151 | 1          | 0.7151 | 0 | 0 | 0 | 0.9325 Ref |
| MT932213 | Unassigned | Unassigned | Unassigned | 290_93  | Clustered/Singleton | 1 VC_290_93  | 1   | 0      | 1          | 0      | 0 | 0 | 0 | 1 Ref      |
| MT932329 | Unassigned | Unassigned | Unassigned | 867_0   | Clustered           | 5 VC_867_0   | 5   | 0.2806 | 0.99999994 | 0.2806 | 0 | 0 | 0 | 1 Ref      |
| MT933737 | Unassigned | Unassigned | Unassigned | 80_0    | Clustered           | 64 VC_80_0   | 64  | 0.418  | 1          | 0.418  | 0 | 0 | 0 | 0.7649 Ref |
| MT936332 | Unassigned | Unassigned | Unassigned | 885_0   | Clustered           | 9 VC_885_0   | 9   | 0.9403 | 1          | 0.9403 | 0 | 0 | 0 | 1 Ref      |
| MT939241 | Unassigned | Unassigned | Unassigned | 707_0   | Clustered           | 2 VC_707_0   | 2   | 0.1033 | 0.95358314 | 0.0985 | 0 | 0 | 0 | 1 Ref      |
| MT939252 | Unassigned | Unassigned | Unassigned | 113_0   | Clustered           | 91 VC_113_0  | 91  | 0.9584 | 1          | 0.9584 | 0 | 0 | 0 | 1 Ref      |
| MT939253 | Unassigned | Unassigned | Unassigned | 601_3   | Clustered           | 12 VC_601_3  | 12  | 0.2339 | 1          | 0.2339 | 0 | 0 | 0 | 0.8636 Ref |
| MT939486 | Unassigned | Unassigned | Unassigned | 170_7   | Clustered           | 7 VC_170_7   | 7   | 0.0952 | 0.99874946 | 0.0951 | 0 | 0 | 0 | 1 Ref      |
| MT939487 | Unassigned | Unassigned | Unassigned | 170_7   | Clustered           | 7 VC_170_7   | 7   | 0.0952 | 0.99874946 | 0.0951 | 0 | 0 | 0 | 1 Ref      |
| MT939488 | Unassigned | Unassigned | Unassigned | 170_7   | Clustered           | 7 VC_170_7   | 7   | 0.0952 | 0.99874946 | 0.0951 | 0 | 0 | 0 | 1 Ref      |
| MT941682 | Unassigned | Unassigned | Unassigned | 1067_0  | Clustered           | 20 VC_1067_0 | 20  | 0.7109 | 1          | 0.7109 | 0 | 0 | 0 | 1 Ref      |
| MT944117 | Unassigned | Unassigned | Unassigned | 871_1   | Clustered           | 26 VC_871_1  | 26  | 0.6303 | 1          | 0.6303 | 0 | 0 | 0 | 0.9815 Ref |
| MT947439 | Unassigned | Unassigned | Unassigned | 310_0   | Clustered           | 155 VC_310_0 | 155 | 0.9979 | 1          | 0.9979 | 0 | 0 | 0 | 1 Ref      |
| MT949699 | Unassigned | Unassigned | Unassigned | 510_2   | Clustered           | 8 VC_510_2   | 8   | 0.122  | 0.98786574 | 0.1205 | 0 | 0 | 0 | 1 Ref      |
| MT951623 | Unassigned | Unassigned | Unassigned | 859_0   | Clustered           | 67 VC_859_0  | 67  | 0.9622 | 1          | 0.9622 | 0 | 0 | 0 | 1 Ref      |
| MT952005 | Unassigned | Unassigned | Unassigned | 617_0   | Clustered           | 6 VC_617_0   | 6   | 0.1792 | 1          | 0.1792 | 0 | 0 | 0 | 1 Ref      |
| MT952844 | Unassigned | Unassigned | Unassigned | 543_0   | Clustered           | 25 VC_543_0  | 25  | 0.4584 | 1          | 0.4584 | 0 | 0 | 0 | 1 Ref      |
| MT952845 | Unassigned | Unassigned | Unassigned | 1249_0  | Clustered           | 8 VC_1249_0  | 8   | 0.191  | 1          | 0.191  | 0 | 0 | 0 | 1 Ref      |
| MT952846 | Unassigned | Unassigned | Unassigned | 1296_0  | Clustered           | 82 VC_1296_0 | 82  | 0.7938 | 1          | 0.7938 | 0 | 0 | 0 | 1 Ref      |
| MT952847 | Unassigned | Unassigned | Unassigned | 335_27  | Clustered           | 6 VC_335_27  | 6   | 0.0266 | 1          | 0.0266 | 0 | 0 | 0 | 0.8 Ref    |
| MT952848 | Unassigned | Unassigned | Unassigned | 1510_0  | Clustered           | 4 VC_1510_0  | 4   | 1      | 1          | 1      | 0 | 0 | 0 | 1 Ref      |
| MT952849 | Unassigned | Unassigned | Unassigned | 384_12  | Clustered           | 4 VC_384_12  | 4   | 0.0125 | 0.99998491 | 0.0125 | 0 | 0 | 0 | 0.8333 Ref |
| MT952850 | Unassigned | Unassigned | Unassigned | 1407_0  | Clustered           | 78 VC_1407_0 | 78  | 0.9731 | 1          | 0.9731 | 0 | 0 | 0 | 1 Ref      |
| MT952851 | Unassigned | Unassigned | Unassigned | 527_0   | Clustered           | 37 VC_527_0  | 37  | 0.9679 | 1          | 0.9679 | 0 | 0 | 0 | 1 Ref      |
| MT952852 | Unassigned | Unassigned | Unassigned | 1115_4  | Clustered           | 4 VC_1115_4  | 4   | 0.0733 | 0.99956559 | 0.0732 | 0 | 0 | 0 | 1 Ref      |
| MT952853 | Unassigned | Unassigned | Unassigned | 1207_0  | Clustered           | 20 VC_1207_0 | 20  | 0.9898 | 1          | 0.9898 | 0 | 0 | 0 | 1 Ref      |
| MT952854 | Unassigned | Unassigned | Unassigned | 571_6   | Clustered           | 22 VC_571_6  | 22  | 0.1207 | 1          | 0.1207 | 0 | 0 | 0 | 0.8095 Ref |
| MT956952 | Unassigned | Unassigned | Unassigned | 279_0   | Clustered           | 11 VC_279_0  | 11  | 0.4839 | 1          | 0.4839 | 0 | 0 | 0 | 0.8727 Ref |
| MT966872 | Unassigned | Unassigned | Unassigned | 848_0   | Clustered           | 124 VC_848_0 | 124 | 0.9484 | 1          | 0.9484 | 0 | 0 | 0 | 1 Ref      |
| MT966873 | Unassigned | Unassigned | Unassigned | 848_0   | Clustered           | 124 VC_848_0 | 124 | 0.9484 | 1          | 0.9484 | 0 | 0 | 0 | 1 Ref      |
| MT968995 | Unassigned | Unassigned | Unassigned | 290_173 | Clustered/Singleton | 1 VC_290_173 | 1   | 0      | 1          | 0      | 0 | 0 | 0 | 1 Ref      |
| MT974436 | Unassigned | Unassigned | Unassigned | 135_7   | Clustered/Singleton | 1 VC_135_7   | 1   | 0      | 1          | 0      | 0 | 0 | 0 | 1 Ref      |
| MT975991 | Unassigned | Unassigned | Unassigned | 1512_0  | Clustered           | 2 VC_1512_0  | 2   | 1      | 1          | 1      | 0 | 0 | 0 | 1 Ref      |
| MT980836 | Unassigned | Unassigned | Unassigned | 348_0   | Clustered           | 6 VC_348_0   | 6   | 0.5971 | 1          | 0.5971 | 0 | 0 | 0 | 1 Ref      |
| MT980837 | Unassigned | Unassigned | Unassigned | 348_0   | Clustered           | 6 VC_348_0   | 6   | 0.5971 | 1          | 0.5971 | 0 | 0 | 0 | 1 Ref      |
| MT980838 | Unassigned | Unassigned | Unassigned | 348_0   | Clustered           | 6 VC_348_0   | 6   | 0.5971 | 1          | 0.5971 | 0 | 0 | 0 | 1 Ref      |
| MT980839 | Unassigned | Unassigned | Unassigned | 348_0   | Clustered           | 6 VC_348_0   | 6   | 0.5971 | 1          | 0.5971 | 0 | 0 | 0 | 1 Ref      |
| MT980840 | Unassigned | Unassigned | Unassigned | 348_0   | Clustered           | 6 VC_348_0   | 6   | 0.5971 | 1          | 0.5971 | 0 | 0 | 0 | 1 Ref      |
| MT980841 | Unassigned | Unassigned | Unassigned | 348_0   | Clustered           | 6 VC_348_0   | 6   | 0.5971 | 1          | 0.5971 | 0 | 0 | 0 | 1 Ref      |
| MT984581 | Unassigned | Unassigned | Unassigned | 290_91  | Clustered           | 11 VC_290_91 | 11  | 0.0281 | 1          | 0.0281 | 0 | 0 | 0 | 1 Ref      |
| MT986025 | Unassigned | Unassigned | Unassigned | 789_0   | Clustered           | 34 VC_789_0  | 34  | 0.9167 | 1          | 0.9167 | 0 | 0 | 0 | 1 Ref      |



|           |            |            |            |        |                     |              |     |        |            |        |   |   |   |            |
|-----------|------------|------------|------------|--------|---------------------|--------------|-----|--------|------------|--------|---|---|---|------------|
| MTY986026 | Unassigned | Unassigned | Unassigned | 1296_0 | Clustered           | 82 VC_1296_0 | 82  | 0.7938 | 1          | 0.7938 | 0 | 0 | 0 | 1 Ref      |
| MTY986027 | Unassigned | Unassigned | Unassigned | 1296_0 | Clustered           | 82 VC_1296_0 | 82  | 0.7938 | 1          | 0.7938 | 0 | 0 | 0 | 1 Ref      |
| MTY986028 | Unassigned | Unassigned | Unassigned | 882_0  | Clustered           | 11 VC_882_0  | 11  | 0.943  | 1          | 0.943  | 0 | 0 | 0 | 1 Ref      |
| MTY986029 | Unassigned | Unassigned | Unassigned | 895_0  | Clustered           | 25 VC_895_0  | 25  | 0.5768 | 1          | 0.5768 | 0 | 0 | 0 | 1 Ref      |
| MTY992243 | Unassigned | Unassigned | Unassigned | 628_0  | Clustered           | 5 VC_628_0   | 5   | 0.4297 | 0.99999996 | 0.4297 | 0 | 0 | 0 | 1 Ref      |
| MTY995926 | Unassigned | Unassigned | Unassigned | 356_0  | Clustered           | 21 VC_356_0  | 21  | 0.5409 | 1          | 0.5409 | 0 | 0 | 0 | 1 Ref      |
| MTY995927 | Unassigned | Unassigned | Unassigned | 356_0  | Clustered           | 21 VC_356_0  | 21  | 0.5409 | 1          | 0.5409 | 0 | 0 | 0 | 1 Ref      |
| MTY995928 | Unassigned | Unassigned | Unassigned | 356_0  | Clustered           | 21 VC_356_0  | 21  | 0.5409 | 1          | 0.5409 | 0 | 0 | 0 | 1 Ref      |
| MW001214  | Unassigned | Unassigned | Unassigned | 89_0   | Clustered           | 8 VC_89_0    | 8   | 0.5507 | 1          | 0.5507 | 0 | 0 | 0 | 1 Ref      |
| MW001769  | Unassigned | Unassigned | Unassigned | 402_0  | Clustered           | 3 VC_402_0   | 3   | 0.051  | 0.99861562 | 0.051  | 0 | 0 | 0 | 1 Ref      |
| MW004544  | Unassigned | Unassigned | Unassigned | 94_0   | Clustered           | 22 VC_94_0   | 22  | 0.5602 | 1          | 0.5602 | 0 | 0 | 0 | 1 Ref      |
| MW004545  | Unassigned | Unassigned | Unassigned | 94_0   | Clustered           | 22 VC_94_0   | 22  | 0.5602 | 1          | 0.5602 | 0 | 0 | 0 | 1 Ref      |
| MW006474  | Unassigned | Unassigned | Unassigned | 340_1  | Clustered           | 17 VC_340_1  | 17  | 0.0863 | 1          | 0.0863 | 0 | 0 | 0 | 0.8235 Ref |
| MW006475  | Unassigned | Unassigned | Unassigned | 340_1  | Clustered           | 17 VC_340_1  | 17  | 0.0863 | 1          | 0.0863 | 0 | 0 | 0 | 0.8235 Ref |
| MW006476  | Unassigned | Unassigned | Unassigned | 135_11 | Clustered           | 2 VC_135_11  | 2   | 0.0059 | 0.93781121 | 0.0056 | 0 | 0 | 0 | 1 Ref      |
| MW006477  | Unassigned | Unassigned | Unassigned | 601_5  | Clustered           | 4 VC_601_5   | 4   | 0.0525 | 0.99930943 | 0.0525 | 0 | 0 | 0 | 0.8333 Ref |
| MW006478  | Unassigned | Unassigned | Unassigned | 199_0  | Clustered           | 2 VC_199_0   | 2   | 0.0066 | 0.95760971 | 0.0063 | 0 | 0 | 0 | 1 Ref      |
| MW006479  | Unassigned | Unassigned | Unassigned | 198_40 | Clustered           | 2 VC_198_40  | 2   | 0.0082 | 0.95556395 | 0.0078 | 0 | 0 | 0 | 1 Ref      |
| MW006480  | Unassigned | Unassigned | Unassigned | 135_11 | Clustered           | 2 VC_135_11  | 2   | 0.0059 | 0.93781121 | 0.0056 | 0 | 0 | 0 | 1 Ref      |
| MW006481  | Unassigned | Unassigned | Unassigned | 199_0  | Clustered           | 2 VC_199_0   | 2   | 0.0066 | 0.95760971 | 0.0063 | 0 | 0 | 0 | 1 Ref      |
| MW006482  | Unassigned | Unassigned | Unassigned | 340_1  | Clustered           | 17 VC_340_1  | 17  | 0.0863 | 1          | 0.0863 | 0 | 0 | 0 | 0.8235 Ref |
| MW012634  | Unassigned | Unassigned | Unassigned | 843_0  | Clustered           | 20 VC_843_0  | 20  | 0.9621 | 1          | 0.9621 | 0 | 0 | 0 | 1 Ref      |
| MW013502  | Unassigned | Unassigned | Unassigned | 30_1   | Clustered           | 53 VC_30_1   | 53  | 0.7151 | 1          | 0.7151 | 0 | 0 | 0 | 0.9325 Ref |
| MW013503  | Unassigned | Unassigned | Unassigned | 30_1   | Clustered           | 53 VC_30_1   | 53  | 0.7151 | 1          | 0.7151 | 0 | 0 | 0 | 0.9325 Ref |
| MW015080  | Unassigned | Unassigned | Unassigned | 352_0  | Clustered           | 31 VC_352_0  | 31  | 0.9547 | 1          | 0.9547 | 0 | 0 | 0 | 1 Ref      |
| MW015081  | Unassigned | Unassigned | Unassigned | 446_12 | Clustered/Singleton | 1 VC_446_12  | 1   | 0      | 1          | 0      | 0 | 0 | 0 | 1 Ref      |
| MW021748  | Unassigned | Unassigned | Unassigned | 603_0  | Clustered           | 28 VC_603_0  | 28  | 0.7692 | 1          | 0.7692 | 0 | 0 | 0 | 1 Ref      |
| MW021749  | Unassigned | Unassigned | Unassigned | 687_1  | Clustered           | 10 VC_687_1  | 10  | 0.1263 | 1          | 0.1263 | 0 | 0 | 0 | 0.9778 Ref |
| MW021750  | Unassigned | Unassigned | Unassigned | 603_0  | Clustered           | 28 VC_603_0  | 28  | 0.7692 | 1          | 0.7692 | 0 | 0 | 0 | 1 Ref      |
| MW021751  | Unassigned | Unassigned | Unassigned | 687_0  | Clustered           | 21 VC_687_0  | 21  | 0.3608 | 1          | 0.3608 | 0 | 0 | 0 | 1 Ref      |
| MW021752  | Unassigned | Unassigned | Unassigned | 509_0  | Clustered           | 36 VC_509_0  | 36  | 0.5291 | 1          | 0.5291 | 0 | 0 | 0 | 0.9714 Ref |
| MW021753  | Unassigned | Unassigned | Unassigned | 135_22 | Clustered           | 13 VC_135_22 | 13  | 0.0795 | 1          | 0.0795 | 0 | 0 | 0 | 0.8205 Ref |
| MW021754  | Unassigned | Unassigned | Unassigned | 135_44 | Clustered/Singleton | 1 VC_135_44  | 1   | 0      | 1          | 0      | 0 | 0 | 0 | 1 Ref      |
| MW021755  | Unassigned | Unassigned | Unassigned | 1409_0 | Clustered           | 10 VC_1409_0 | 10  | 0.7779 | 1          | 0.7779 | 0 | 0 | 0 | 1 Ref      |
| MW021756  | Unassigned | Unassigned | Unassigned | 687_0  | Clustered           | 21 VC_687_0  | 21  | 0.3608 | 1          | 0.3608 | 0 | 0 | 0 | 1 Ref      |
| MW021757  | Unassigned | Unassigned | Unassigned | 135_22 | Clustered           | 13 VC_135_22 | 13  | 0.0795 | 1          | 0.0795 | 0 | 0 | 0 | 0.8205 Ref |
| MW021758  | Unassigned | Unassigned | Unassigned | 506_1  | Clustered           | 8 VC_506_1   | 8   | 0.2893 | 1          | 0.2893 | 0 | 0 | 0 | 1 Ref      |
| MW021760  | Unassigned | Unassigned | Unassigned | 135_46 | Clustered/Singleton | 1 VC_135_46  | 1   | 0      | 1          | 0      | 0 | 0 | 0 | 1 Ref      |
| MW021762  | Unassigned | Unassigned | Unassigned | 971_0  | Clustered           | 40 VC_971_0  | 40  | 0.6793 | 1          | 0.6793 | 0 | 0 | 0 | 0.9359 Ref |
| MW021763  | Unassigned | Unassigned | Unassigned | 1409_0 | Clustered           | 10 VC_1409_0 | 10  | 0.7779 | 1          | 0.7779 | 0 | 0 | 0 | 1 Ref      |
| MW021764  | Unassigned | Unassigned | Unassigned | 971_0  | Clustered           | 40 VC_971_0  | 40  | 0.6793 | 1          | 0.6793 | 0 | 0 | 0 | 0.9359 Ref |
| MW021765  | Unassigned | Unassigned | Unassigned | 971_0  | Clustered           | 40 VC_971_0  | 40  | 0.6793 | 1          | 0.6793 | 0 | 0 | 0 | 0.9359 Ref |
| MW021766  | Unassigned | Unassigned | Unassigned | 1409_0 | Clustered           | 10 VC_1409_0 | 10  | 0.7779 | 1          | 0.7779 | 0 | 0 | 0 | 1 Ref      |
| MW023914  | Unassigned | Unassigned | Unassigned | 497_0  | Clustered           | 4 VC_497_0   | 4   | 0.0962 | 0.999525   | 0.0961 | 0 | 0 | 0 | 1 Ref      |
| MW032452  | Unassigned | Unassigned | Unassigned | 604_0  | Clustered           | 4 VC_604_0   | 4   | 0.0531 | 0.99998755 | 0.0531 | 0 | 0 | 0 | 1 Ref      |
| MW032477  | Unassigned | Unassigned | Unassigned | 210_0  | Clustered           | 105 VC_210_0 | 105 | 0.4076 | 1          | 0.4076 | 0 | 0 | 0 | 0.7766 Ref |
| MW041632  | Unassigned | Unassigned | Unassigned | 210_0  | Clustered           | 105 VC_210_0 | 105 | 0.4076 | 1          | 0.4076 | 0 | 0 | 0 | 0.7766 Ref |
| MW041633  | Unassigned | Unassigned | Unassigned | 210_0  | Clustered           | 105 VC_210_0 | 105 | 0.4076 | 1          | 0.4076 | 0 | 0 | 0 | 0.7766 Ref |
| MW041634  | Unassigned | Unassigned | Unassigned | 210_0  | Clustered           | 105 VC_210_0 | 105 | 0.4076 | 1          | 0.4076 | 0 | 0 | 0 | 0.7766 Ref |
| MW041635  | Unassigned | Unassigned | Unassigned | 210_0  | Clustered           | 105 VC_210_0 | 105 | 0.4076 | 1          | 0.4076 | 0 | 0 | 0 | 0.7766 Ref |
| MW041636  | Unassigned | Unassigned | Unassigned | 210_0  | Clustered           | 105 VC_210_0 | 105 | 0.4076 | 1          | 0.4076 | 0 | 0 | 0 | 0.7766 Ref |
| MW041637  | Unassigned | Unassigned | Unassigned | 210_0  | Clustered           | 105 VC_210_0 | 105 | 0.4076 | 1          | 0.4076 | 0 | 0 | 0 | 0.7766 Ref |
| MW041638  | Unassigned | Unassigned | Unassigned | 210_0  | Clustered           | 105 VC_210_0 | 105 | 0.4076 | 1          | 0.4076 | 0 | 0 | 0 | 0.7766 Ref |
| MW041639  | Unassigned | Unassigned | Unassigned | 210_0  | Clustered           | 105 VC_210_0 | 105 | 0.4076 | 1          | 0.4076 | 0 | 0 | 0 | 0.7766 Ref |
| MW041640  | Unassigned | Unassigned | Unassigned | 210_0  | Clustered           | 105 VC_210_0 | 105 | 0.4076 | 1          | 0.4076 | 0 | 0 | 0 | 0.7766 Ref |
| MW042787  | Unassigned | Unassigned | Unassigned | 848_0  | Clustered           | 124 VC_848_0 | 124 | 0.9484 | 1          | 0.9484 | 0 | 0 | 0 | 1 Ref      |
| MW042788  | Unassigned | Unassigned | Unassigned | 848_0  | Clustered           | 124 VC_848_0 | 124 | 0.9484 | 1          | 0.9484 | 0 | 0 | 0 | 1 Ref      |
| MW042789  | Unassigned | Unassigned | Unassigned | 848_0  | Clustered           | 124 VC_848_0 | 124 | 0.9484 | 1          | 0.9484 | 0 | 0 | 0 | 1 Ref      |
| MW042790  | Unassigned | Unassigned | Unassigned | 848_0  | Clustered           | 124 VC_848_0 | 124 | 0.9484 | 1          | 0.9484 | 0 | 0 | 0 | 1 Ref      |
| MW042791  | Unassigned | Unassigned | Unassigned | 848_0  | Clustered           | 124 VC_848_0 | 124 | 0.9484 | 1          | 0.9484 | 0 | 0 | 0 | 1 Ref      |
| MW042792  | Unassigned | Unassigned | Unassigned | 848_0  | Clustered           | 124 VC_848_0 | 124 | 0.9484 | 1          | 0.9484 | 0 | 0 | 0 | 1 Ref      |
| MW042793  | Unassigned | Unassigned | Unassigned | 848_0  | Clustered           | 124 VC_848_0 | 124 | 0.9484 | 1          | 0.9484 | 0 | 0 | 0 | 1 Ref      |
| MW042794  | Unassigned | Unassigned | Unassigned | 848_0  | Clustered           | 124 VC_848_0 | 124 | 0.9484 | 1          | 0.9484 | 0 | 0 | 0 | 1 Ref      |
| MW042795  | Unassigned | Unassigned | Unassigned | 848_0  | Clustered           | 124 VC_848_0 | 124 | 0.9484 | 1          | 0.9484 | 0 | 0 | 0 | 1 Ref      |
| MW042796  | Unassigned | Unassigned | Unassigned | 848_0  | Clustered           | 124 VC_848_0 | 124 | 0.9484 | 1          | 0.9484 | 0 | 0 | 0 | 1 Ref      |
| MW042797  | Unassigned | Unassigned | Unassigned | 848_0  | Clustered           | 124 VC_848_0 | 124 | 0.9484 | 1          | 0.9484 | 0 | 0 | 0 | 1 Ref      |
| MW042798  | Unassigned | Unassigned | Unassigned | 848_0  | Clustered           | 124 VC_848_0 | 124 | 0.9484 | 1          | 0.9484 | 0 | 0 | 0 | 1 Ref      |
| MW042799  | Unassigned | Unassigned | Unassigned | 848_0  | Clustered           | 124 VC_848_0 | 124 | 0.9484 | 1          | 0.9484 | 0 | 0 | 0 | 1 Ref      |
| MW042800  | Unassigned | Unassigned | Unassigned | 848_0  | Clustered           | 124 VC_848_0 | 124 | 0.9484 | 1          | 0.9484 | 0 | 0 | 0 | 1 Ref      |
| MW042801  | Unassigned | Unassigned | Unassigned | 848_0  | Clustered           | 124 VC_848_0 | 124 | 0.9484 | 1          | 0.9484 | 0 | 0 | 0 | 1 Ref      |
| MW042802  | Unassigned | Unassigned | Unassigned | 971_0  | Clustered           | 40 VC_971_0  | 40  | 0.6793 | 1          | 0.6793 | 0 | 0 | 0 | 0.9359 Ref |
| MW042803  | Unassigned | Unassigned | Unassigned | 848_0  | Clustered           | 124 VC_848_0 | 124 | 0.9484 | 1          | 0.9484 | 0 | 0 | 0 | 1 Ref      |
| MW042804  | Unassigned | Unassigned | Unassigned | 848_0  | Clustered           | 124 VC_848_0 | 124 | 0.9484 | 1          | 0.9484 | 0 | 0 | 0 | 1 Ref      |
| MW042805  | Unassigned | Unassigned | Unassigned | 848_0  | Clustered           | 124 VC_848_0 | 124 | 0.9484 | 1          | 0.9484 | 0 | 0 | 0 | 1 Ref      |
| MW042806  | Unassigned | Unassigned | Unassigned | 848_0  | Clustered           | 124 VC_848_0 | 124 | 0.9484 | 1          | 0.9484 | 0 | 0 | 0 | 1 Ref      |
| MW042807  | Unassigned | Unassigned | Unassigned | 848_0  | Clustered           | 124 VC_848_0 | 124 | 0.9484 | 1          | 0.9484 | 0 | 0 | 0 | 1 Ref      |
| MW042808  | Unassigned | Unassigned | Unassigned | 848_0  | Clustered           | 124 VC_848_0 | 124 | 0.9484 | 1          | 0.9484 | 0 | 0 | 0 | 1 Ref      |
| MW042809  | Unassigned | Unassigned | Unassigned | 848_0  | Clustered           | 124 VC_848_0 | 124 | 0.9484 | 1          | 0.9484 | 0 | 0 | 0 | 1 Ref      |
| MW042810  | Unassigned | Unassigned | Unassigned | 848_0  | Clustered           | 124 VC_848_0 | 124 | 0.9484 | 1          | 0.9484 | 0 | 0 | 0 | 1 Ref      |
| MW042811  | Unassigned | Unassigned | Unassigned | 848_0  | Clustered           | 124 VC_848_0 | 124 | 0.9484 | 1          | 0.9484 | 0 | 0 | 0 | 1 Ref      |
| MW042812  | Unassigned | Unassigned | Unassigned | 848_0  | Clustered           | 124 VC_848_0 | 124 | 0.9484 | 1          | 0.9484 | 0 | 0 | 0 | 1 Ref      |



|          |            |            |            |        |                     |              |     |        |            |        |   |   |   |            |
|----------|------------|------------|------------|--------|---------------------|--------------|-----|--------|------------|--------|---|---|---|------------|
| MW043865 | Unassigned | Unassigned | Unassigned | 1021_0 | Clustered           | 2 VC_1021_0  | 2   | 0.1576 | 0.95268934 | 0.1501 | 0 | 0 | 0 | 1 Ref      |
| MW055901 | Unassigned | Unassigned | Unassigned | 1218_0 | Clustered           | 14 VC_1218_0 | 14  | 0.7811 | 1          | 0.7811 | 0 | 0 | 0 | 0.989 Ref  |
| MW055902 | Unassigned | Unassigned | Unassigned | 537_0  | Clustered           | 39 VC_537_0  | 39  | 0.8148 | 1          | 0.8148 | 0 | 0 | 0 | 1 Ref      |
| MW055903 | Unassigned | Unassigned | Unassigned | 1406_0 | Clustered           | 21 VC_1406_0 | 21  | 0.9836 | 1          | 0.9836 | 0 | 0 | 0 | 1 Ref      |
| MW055904 | Unassigned | Unassigned | Unassigned | 228_0  | Clustered           | 22 VC_228_0  | 22  | 0.7411 | 1          | 0.7411 | 0 | 0 | 0 | 1 Ref      |
| MW055905 | Unassigned | Unassigned | Unassigned | 901_0  | Clustered           | 31 VC_901_0  | 31  | 0.8235 | 1          | 0.8235 | 0 | 0 | 0 | 0.8194 Ref |
| MW055906 | Unassigned | Unassigned | Unassigned | 385_2  | Clustered           | 5 VC_385_2   | 5   | 0.0717 | 0.99999997 | 0.0717 | 0 | 0 | 0 | 0.9 Ref    |
| MW055907 | Unassigned | Unassigned | Unassigned | 1407_0 | Clustered           | 78 VC_1407_0 | 78  | 0.9731 | 1          | 0.9731 | 0 | 0 | 0 | 1 Ref      |
| MW055908 | Unassigned | Unassigned | Unassigned | 1216_0 | Clustered           | 22 VC_1216_0 | 22  | 0.4546 | 1          | 0.4546 | 0 | 0 | 0 | 1 Ref      |
| MW055909 | Unassigned | Unassigned | Unassigned | 1407_0 | Clustered           | 78 VC_1407_0 | 78  | 0.9731 | 1          | 0.9731 | 0 | 0 | 0 | 1 Ref      |
| MW055910 | Unassigned | Unassigned | Unassigned | 1250_0 | Clustered           | 29 VC_1250_0 | 29  | 0.822  | 1          | 0.822  | 0 | 0 | 0 | 1 Ref      |
| MW055911 | Unassigned | Unassigned | Unassigned | 1296_0 | Clustered           | 82 VC_1296_0 | 82  | 0.7938 | 1          | 0.7938 | 0 | 0 | 0 | 1 Ref      |
| MW055912 | Unassigned | Unassigned | Unassigned | 1204_0 | Clustered           | 25 VC_1204_0 | 25  | 0.7382 | 1          | 0.7382 | 0 | 0 | 0 | 1 Ref      |
| MW055914 | Unassigned | Unassigned | Unassigned | 1424_0 | Clustered           | 31 VC_1424_0 | 31  | 0.8834 | 1          | 0.8834 | 0 | 0 | 0 | 1 Ref      |
| MW055915 | Unassigned | Unassigned | Unassigned | 538_61 | Clustered/Singleton | 1 VC_538_61  | 1   | 0      | 1          | 0      | 0 | 0 | 0 | 1 Ref      |
| MW056501 | Unassigned | Unassigned | Unassigned | 714_0  | Clustered           | 71 VC_714_0  | 71  | 0.935  | 1          | 0.935  | 0 | 0 | 0 | 1 Ref      |
| MW056502 | Unassigned | Unassigned | Unassigned | 714_0  | Clustered           | 71 VC_714_0  | 71  | 0.935  | 1          | 0.935  | 0 | 0 | 0 | 1 Ref      |
| MW056503 | Unassigned | Unassigned | Unassigned | 714_0  | Clustered           | 71 VC_714_0  | 71  | 0.935  | 1          | 0.935  | 0 | 0 | 0 | 1 Ref      |
| MW057854 | Unassigned | Unassigned | Unassigned | 409_0  | Clustered           | 2 VC_409_0   | 2   | 0.0697 | 0.95760775 | 0.0667 | 0 | 0 | 0 | 1 Ref      |
| MW057855 | Unassigned | Unassigned | Unassigned | 249_1  | Clustered           | 21 VC_249_1  | 21  | 0.6775 | 1          | 0.6775 | 0 | 0 | 0 | 0.8476 Ref |
| MW057857 | Unassigned | Unassigned | Unassigned | 201_0  | Clustered           | 2 VC_201_0   | 2   | 0.0315 | 0.95762656 | 0.0301 | 0 | 0 | 0 | 1 Ref      |
| MW057858 | Unassigned | Unassigned | Unassigned | 295_4  | Clustered/Singleton | 1 VC_295_4   | 1   | 0      | 1          | 0      | 0 | 0 | 0 | 1 Ref      |
| MW057859 | Unassigned | Unassigned | Unassigned | 53_0   | Clustered           | 10 VC_53_0   | 10  | 0.1743 | 1          | 0.1743 | 0 | 0 | 0 | 1 Ref      |
| MW057860 | Unassigned | Unassigned | Unassigned | 611_0  | Clustered           | 50 VC_611_0  | 50  | 0.7306 | 1          | 0.7306 | 0 | 0 | 0 | 1 Ref      |
| MW057918 | Unassigned | Unassigned | Unassigned | 470_0  | Clustered           | 62 VC_470_0  | 62  | 0.902  | 1          | 0.902  | 0 | 0 | 0 | 1 Ref      |
| MW057919 | Unassigned | Unassigned | Unassigned | 356_0  | Clustered           | 21 VC_356_0  | 21  | 0.5409 | 1          | 0.5409 | 0 | 0 | 0 | 1 Ref      |
| MW057920 | Unassigned | Unassigned | Unassigned | 929_0  | Clustered           | 10 VC_929_0  | 10  | 0.7185 | 1          | 0.7185 | 0 | 0 | 0 | 1 Ref      |
| MW067000 | Unassigned | Unassigned | Unassigned | 691_0  | Clustered           | 18 VC_691_0  | 18  | 0.6865 | 1          | 0.6865 | 0 | 0 | 0 | 0.9477 Ref |
| MW067001 | Unassigned | Unassigned | Unassigned | 691_0  | Clustered           | 18 VC_691_0  | 18  | 0.6865 | 1          | 0.6865 | 0 | 0 | 0 | 0.9477 Ref |
| MW067002 | Unassigned | Unassigned | Unassigned | 691_0  | Clustered           | 18 VC_691_0  | 18  | 0.6865 | 1          | 0.6865 | 0 | 0 | 0 | 0.9477 Ref |
| MW067003 | Unassigned | Unassigned | Unassigned | 691_0  | Clustered           | 18 VC_691_0  | 18  | 0.6865 | 1          | 0.6865 | 0 | 0 | 0 | 0.9477 Ref |
| MW072790 | Unassigned | Unassigned | Unassigned | 3_0    | Clustered           | 17 VC_3_0    | 17  | 0.5615 | 1          | 0.5615 | 0 | 0 | 0 | 1 Ref      |
| MW073017 | Unassigned | Unassigned | Unassigned | 494_1  | Clustered/Singleton | 1 VC_494_1   | 1   | 0      | 1          | 0      | 0 | 0 | 0 | 1 Ref      |
| MW073100 | Unassigned | Unassigned | Unassigned | 877_0  | Clustered           | 2 VC_877_0   | 2   | 0.2717 | 0.72985431 | 0.1983 | 0 | 0 | 0 | 1 Ref      |
| MW074885 | Unassigned | Unassigned | Unassigned | 405_0  | Clustered           | 126 VC_405_0 | 126 | 0.9614 | 1          | 0.9614 | 0 | 0 | 0 | 1 Ref      |
| MW084976 | Unassigned | Unassigned | Unassigned | 489_7  | Clustered/Singleton | 1 VC_489_7   | 1   | 0      | 1          | 0      | 0 | 0 | 0 | 1 Ref      |
| MW091529 | Unassigned | Unassigned | Unassigned | 480_0  | Clustered           | 3 VC_480_0   | 3   | 0.3096 | 0.99749973 | 0.3088 | 0 | 0 | 0 | 1 Ref      |
| MW114771 | Unassigned | Unassigned | Unassigned | 821_0  | Clustered           | 5 VC_821_0   | 5   | 0.2385 | 0.99999997 | 0.2385 | 0 | 0 | 0 | 1 Ref      |
| MW117144 | Unassigned | Unassigned | Unassigned | 434_0  | Clustered           | 45 VC_434_0  | 45  | 0.9479 | 1          | 0.9479 | 0 | 0 | 0 | 1 Ref      |
| MW117966 | Unassigned | Unassigned | Unassigned | 447_9  | Clustered/Singleton | 1 VC_447_9   | 1   | 0      | 1          | 0      | 0 | 0 | 0 | 1 Ref      |
| MW119258 | Unassigned | Unassigned | Unassigned | 474_0  | Clustered           | 19 VC_474_0  | 19  | 0.3729 | 1          | 0.3729 | 0 | 0 | 0 | 1 Ref      |
| MW119570 | Unassigned | Unassigned | Unassigned | 783_0  | Clustered           | 67 VC_783_0  | 67  | 0.8945 | 1          | 0.8945 | 0 | 0 | 0 | 1 Ref      |
| MW132713 | Unassigned | Unassigned | Unassigned | 419_0  | Clustered           | 11 VC_419_0  | 11  | 0.9465 | 1          | 0.9465 | 0 | 0 | 0 | 1 Ref      |
| MW132714 | Unassigned | Unassigned | Unassigned | 566_8  | Clustered/Singleton | 1 VC_566_8   | 1   | 0      | 1          | 0      | 0 | 0 | 0 | 1 Ref      |
| MW145139 | Unassigned | Unassigned | Unassigned | 610_0  | Clustered           | 14 VC_610_0  | 14  | 0.5159 | 1          | 0.5159 | 0 | 0 | 0 | 1 Ref      |
| MW145539 | Unassigned | Unassigned | Unassigned | 901_0  | Clustered           | 31 VC_901_0  | 31  | 0.8235 | 1          | 0.8235 | 0 | 0 | 0 | 0.8194 Ref |
| MW147366 | Unassigned | Unassigned | Unassigned | 7_0    | Clustered           | 28 VC_7_0    | 28  | 0.389  | 1          | 0.389  | 0 | 0 | 0 | 0.9947 Ref |
| MW147367 | Unassigned | Unassigned | Unassigned | 447_7  | Clustered/Singleton | 1 VC_447_7   | 1   | 0      | 1          | 0      | 0 | 0 | 0 | 1 Ref      |
| MW147598 | Unassigned | Unassigned | Unassigned | 816_0  | Clustered           | 35 VC_816_0  | 35  | 0.9824 | 1          | 0.9824 | 0 | 0 | 0 | 1 Ref      |
| MW147599 | Unassigned | Unassigned | Unassigned | 816_0  | Clustered           | 35 VC_816_0  | 35  | 0.9824 | 1          | 0.9824 | 0 | 0 | 0 | 1 Ref      |
| MW147600 | Unassigned | Unassigned | Unassigned | 816_0  | Clustered           | 35 VC_816_0  | 35  | 0.9824 | 1          | 0.9824 | 0 | 0 | 0 | 1 Ref      |
| MW147601 | Unassigned | Unassigned | Unassigned | 816_0  | Clustered           | 35 VC_816_0  | 35  | 0.9824 | 1          | 0.9824 | 0 | 0 | 0 | 1 Ref      |
| MW147602 | Unassigned | Unassigned | Unassigned | 816_0  | Clustered           | 35 VC_816_0  | 35  | 0.9824 | 1          | 0.9824 | 0 | 0 | 0 | 1 Ref      |
| MW147603 | Unassigned | Unassigned | Unassigned | 399_0  | Clustered           | 49 VC_399_0  | 49  | 0.7927 | 1          | 0.7927 | 0 | 0 | 0 | 1 Ref      |
| MW149272 | Unassigned | Unassigned | Unassigned | 611_0  | Clustered           | 50 VC_611_0  | 50  | 0.7306 | 1          | 0.7306 | 0 | 0 | 0 | 1 Ref      |
| MW149273 | Unassigned | Unassigned | Unassigned | 198_23 | Clustered           | 10 VC_198_23 | 10  | 0.0697 | 1          | 0.0697 | 0 | 0 | 0 | 0.8444 Ref |
| MW149274 | Unassigned | Unassigned | Unassigned | 297_5  | Clustered           | 14 VC_297_5  | 14  | 0.141  | 1          | 0.141  | 0 | 0 | 0 | 0.9231 Ref |
| MW149275 | Unassigned | Unassigned | Unassigned | 198_23 | Clustered           | 10 VC_198_23 | 10  | 0.0697 | 1          | 0.0697 | 0 | 0 | 0 | 0.8444 Ref |
| MW161461 | Unassigned | Unassigned | Unassigned | 787_0  | Clustered           | 132 VC_787_0 | 132 | 1      | 1          | 1      | 0 | 0 | 0 | 1 Ref      |
| MW161462 | Unassigned | Unassigned | Unassigned | 787_0  | Clustered           | 132 VC_787_0 | 132 | 1      | 1          | 1      | 0 | 0 | 0 | 1 Ref      |
| MW161463 | Unassigned | Unassigned | Unassigned | 787_0  | Clustered           | 132 VC_787_0 | 132 | 1      | 1          | 1      | 0 | 0 | 0 | 1 Ref      |
| MW161464 | Unassigned | Unassigned | Unassigned | 787_0  | Clustered           | 132 VC_787_0 | 132 | 1      | 1          | 1      | 0 | 0 | 0 | 1 Ref      |
| MW161465 | Unassigned | Unassigned | Unassigned | 787_0  | Clustered           | 132 VC_787_0 | 132 | 1      | 1          | 1      | 0 | 0 | 0 | 1 Ref      |
| MW161466 | Unassigned | Unassigned | Unassigned | 787_0  | Clustered           | 132 VC_787_0 | 132 | 1      | 1          | 1      | 0 | 0 | 0 | 1 Ref      |
| MW161467 | Unassigned | Unassigned | Unassigned | 787_0  | Clustered           | 132 VC_787_0 | 132 | 1      | 1          | 1      | 0 | 0 | 0 | 1 Ref      |
| MW161468 | Unassigned | Unassigned | Unassigned | 787_0  | Clustered           | 132 VC_787_0 | 132 | 1      | 1          | 1      | 0 | 0 | 0 | 1 Ref      |
| MW175414 | Unassigned | Unassigned | Unassigned | 801_0  | Clustered           | 37 VC_801_0  | 37  | 0.5672 | 1          | 0.5672 | 0 | 0 | 0 | 1 Ref      |
| MW175491 | Unassigned | Unassigned | Unassigned | 79_3   | Clustered           | 11 VC_79_3   | 11  | 0.2561 | 1          | 0.2561 | 0 | 0 | 0 | 1 Ref      |
| MW175890 | Unassigned | Unassigned | Unassigned | 871_1  | Clustered           | 26 VC_871_1  | 26  | 0.6303 | 1          | 0.6303 | 0 | 0 | 0 | 0.9815 Ref |
| MW176032 | Unassigned | Unassigned | Unassigned | 628_0  | Clustered           | 5 VC_628_0   | 5   | 0.4297 | 0.99999996 | 0.4297 | 0 | 0 | 0 | 1 Ref      |
| MW176033 | Unassigned | Unassigned | Unassigned | 688_0  | Clustered           | 2 VC_688_0   | 2   | 0.6866 | 0.72985431 | 0.5011 | 0 | 0 | 0 | 1 Ref      |
| MW176034 | Unassigned | Unassigned | Unassigned | 628_0  | Clustered           | 5 VC_628_0   | 5   | 0.4297 | 0.99999996 | 0.4297 | 0 | 0 | 0 | 1 Ref      |
| MW192778 | Unassigned | Unassigned | Unassigned | 7_0    | Clustered           | 28 VC_7_0    | 28  | 0.389  | 1          | 0.389  | 0 | 0 | 0 | 0.9947 Ref |
| MW201959 | Unassigned | Unassigned | Unassigned | 654_0  | Clustered           | 115 VC_654_0 | 115 | 0.7303 | 1          | 0.7303 | 0 | 0 | 0 | 0.8764 Ref |
| MW202412 | Unassigned | Unassigned | Unassigned | 1028_0 | Clustered           | 69 VC_1028_0 | 69  | 0.8547 | 1          | 0.8547 | 0 | 0 | 0 | 1 Ref      |
| MW202414 | Unassigned | Unassigned | Unassigned | 1028_0 | Clustered           | 69 VC_1028_0 | 69  | 0.8547 | 1          | 0.8547 | 0 | 0 | 0 | 1 Ref      |
| MW202445 | Unassigned | Unassigned | Unassigned | 1119_0 | Clustered           | 48 VC_1119_0 | 48  | 0.852  | 1          | 0.852  | 0 | 0 | 0 | 1 Ref      |
| MW202462 | Unassigned | Unassigned | Unassigned | 1039_0 | Clustered           | 2 VC_1039_0  | 2   | 0.4551 | 0.94225536 | 0.4289 | 0 | 0 | 0 | 1 Ref      |
| MW202464 | Unassigned | Unassigned | Unassigned | 1124_0 | Clustered           | 3 VC_1124_0  | 3   | 0.6921 | 0.61954664 | 0.4288 | 0 | 0 | 0 | 1 Ref      |
| MW202466 | Unassigned | Unassigned | Unassigned | 1028_0 | Clustered           | 69 VC_1028_0 | 69  | 0.8547 | 1          | 0.8547 | 0 | 0 | 0 | 1 Ref      |
| MW202471 | Unassigned | Unassigned | Unassigned | 1028_0 | Clustered           | 69 VC_1028_0 | 69  | 0.8547 | 1          | 0.8547 | 0 | 0 | 0 | 1 Ref      |



|          |            |            |            |        |                     |              |    |        |            |        |   |   |   |            |
|----------|------------|------------|------------|--------|---------------------|--------------|----|--------|------------|--------|---|---|---|------------|
| MW202473 | Unassigned | Unassigned | Unassigned | 545_0  | Clustered           | 3 VC_545_0   | 3  | 0.2336 | 0.99839891 | 0.2332 | 0 | 0 | 0 | 1 Ref      |
| MW202475 | Unassigned | Unassigned | Unassigned | 169_0  | Clustered           | 2 VC_169_0   | 2  | 0.2842 | 0.94006209 | 0.2672 | 0 | 0 | 0 | 1 Ref      |
| MW202478 | Unassigned | Unassigned | Unassigned | 545_0  | Clustered           | 3 VC_545_0   | 3  | 0.2336 | 0.99839891 | 0.2332 | 0 | 0 | 0 | 1 Ref      |
| MW202486 | Unassigned | Unassigned | Unassigned | 1515_0 | Clustered           | 3 VC_1515_0  | 3  | 1      | 0          | 0      | 0 | 0 | 0 | 1 Ref      |
| MW202489 | Unassigned | Unassigned | Unassigned | 353_0  | Clustered           | 3 VC_353_0   | 3  | 0.2241 | 0.81279277 | 0.1821 | 0 | 0 | 0 | 1 Ref      |
| MW202496 | Unassigned | Unassigned | Unassigned | 629_0  | Clustered           | 4 VC_629_0   | 4  | 0.4856 | 0.99992419 | 0.4856 | 0 | 0 | 0 | 1 Ref      |
| MW202520 | Unassigned | Unassigned | Unassigned | 832_0  | Clustered           | 2 VC_832_0   | 2  | 0.3668 | 0.94926484 | 0.3482 | 0 | 0 | 0 | 1 Ref      |
| MW202524 | Unassigned | Unassigned | Unassigned | 1517_0 | Clustered           | 3 VC_1517_0  | 3  | 1      | 0          | 0      | 0 | 0 | 0 | 1 Ref      |
| MW202535 | Unassigned | Unassigned | Unassigned | 338_0  | Clustered           | 12 VC_338_0  | 12 | 0.8919 | 1          | 0.8919 | 0 | 0 | 0 | 1 Ref      |
| MW202544 | Unassigned | Unassigned | Unassigned | 1039_0 | Clustered           | 2 VC_1039_0  | 2  | 0.4551 | 0.94225536 | 0.4289 | 0 | 0 | 0 | 1 Ref      |
| MW202545 | Unassigned | Unassigned | Unassigned | 1472_0 | Clustered           | 2 VC_1472_0  | 2  | 0.8077 | 0.81445332 | 0.6579 | 0 | 0 | 0 | 1 Ref      |
| MW202549 | Unassigned | Unassigned | Unassigned | 1028_0 | Clustered           | 69 VC_1028_0 | 69 | 0.8547 | 1          | 0.8547 | 0 | 0 | 0 | 1 Ref      |
| MW202557 | Unassigned | Unassigned | Unassigned | 830_0  | Clustered           | 3 VC_830_0   | 3  | 0.5256 | 0.99825218 | 0.5246 | 0 | 0 | 0 | 1 Ref      |
| MW202566 | Unassigned | Unassigned | Unassigned | 1277_0 | Clustered           | 2 VC_1277_0  | 2  | 1      | 1          | 1      | 0 | 0 | 0 | 1 Ref      |
| MW202572 | Unassigned | Unassigned | Unassigned | 1516_0 | Clustered           | 4 VC_1516_0  | 4  | 0.9888 | 0.9933271  | 0.9822 | 0 | 0 | 0 | 1 Ref      |
| MW202581 | Unassigned | Unassigned | Unassigned | 205_0  | Clustered           | 5 VC_205_0   | 5  | 0.1325 | 0.84698401 | 0.1122 | 0 | 0 | 0 | 1 Ref      |
| MW202587 | Unassigned | Unassigned | Unassigned | 1028_0 | Clustered           | 69 VC_1028_0 | 69 | 0.8547 | 1          | 0.8547 | 0 | 0 | 0 | 1 Ref      |
| MW202591 | Unassigned | Unassigned | Unassigned | 1515_0 | Clustered           | 3 VC_1515_0  | 3  | 1      | 0          | 0      | 0 | 0 | 0 | 1 Ref      |
| MW202596 | Unassigned | Unassigned | Unassigned | 1276_0 | Clustered           | 3 VC_1276_0  | 3  | 1      | 0          | 0      | 0 | 0 | 0 | 1 Ref      |
| MW202601 | Unassigned | Unassigned | Unassigned | 1518_0 | Clustered           | 2 VC_1518_0  | 2  | 1      | 1          | 1      | 0 | 0 | 0 | 1 Ref      |
| MW202604 | Unassigned | Unassigned | Unassigned | 1518_0 | Clustered           | 2 VC_1518_0  | 2  | 1      | 1          | 1      | 0 | 0 | 0 | 1 Ref      |
| MW202608 | Unassigned | Unassigned | Unassigned | 1519_0 | Clustered           | 5 VC_1519_0  | 5  | 1      | 1          | 1      | 0 | 0 | 0 | 1 Ref      |
| MW202609 | Unassigned | Unassigned | Unassigned | 1119_0 | Clustered           | 48 VC_1119_0 | 48 | 0.852  | 1          | 0.852  | 0 | 0 | 0 | 1 Ref      |
| MW202613 | Unassigned | Unassigned | Unassigned | 1513_0 | Clustered           | 2 VC_1513_0  | 2  | 0.967  | 0.86822376 | 0.8396 | 0 | 0 | 0 | 1 Ref      |
| MW202618 | Unassigned | Unassigned | Unassigned | 1131_0 | Clustered           | 2 VC_1131_0  | 2  | 0.5449 | 0.5        | 0.2725 | 0 | 0 | 0 | 1 Ref      |
| MW202622 | Unassigned | Unassigned | Unassigned | 1520_0 | Clustered           | 2 VC_1520_0  | 2  | 1      | 1          | 1      | 0 | 0 | 0 | 1 Ref      |
| MW202631 | Unassigned | Unassigned | Unassigned | 1516_0 | Clustered           | 4 VC_1516_0  | 4  | 0.9888 | 0.9933271  | 0.9822 | 0 | 0 | 0 | 1 Ref      |
| MW202637 | Unassigned | Unassigned | Unassigned | 1514_0 | Clustered           | 2 VC_1514_0  | 2  | 0.8601 | 0.76024994 | 0.6539 | 0 | 0 | 0 | 1 Ref      |
| MW202640 | Unassigned | Unassigned | Unassigned | 546_0  | Clustered           | 3 VC_546_0   | 3  | 0.1718 | 0.99838527 | 0.1715 | 0 | 0 | 0 | 1 Ref      |
| MW202642 | Unassigned | Unassigned | Unassigned | 1521_0 | Clustered           | 3 VC_1521_0  | 3  | 1      | 1          | 1      | 0 | 0 | 0 | 1 Ref      |
| MW202645 | Unassigned | Unassigned | Unassigned | 1516_0 | Clustered           | 4 VC_1516_0  | 4  | 0.9888 | 0.9933271  | 0.9822 | 0 | 0 | 0 | 1 Ref      |
| MW202655 | Unassigned | Unassigned | Unassigned | 830_0  | Clustered           | 3 VC_830_0   | 3  | 0.5256 | 0.99825218 | 0.5246 | 0 | 0 | 0 | 1 Ref      |
| MW202657 | Unassigned | Unassigned | Unassigned | 1522_0 | Clustered           | 2 VC_1522_0  | 2  | 1      | 1          | 1      | 0 | 0 | 0 | 1 Ref      |
| MW202658 | Unassigned | Unassigned | Unassigned | 1520_0 | Clustered           | 2 VC_1520_0  | 2  | 1      | 1          | 1      | 0 | 0 | 0 | 1 Ref      |
| MW202665 | Unassigned | Unassigned | Unassigned | 119_0  | Clustered           | 9 VC_119_0   | 9  | 0.9977 | 0.98988637 | 0.9876 | 0 | 0 | 0 | 1 Ref      |
| MW202671 | Unassigned | Unassigned | Unassigned | 1124_0 | Clustered           | 3 VC_1124_0  | 3  | 0.6921 | 0.61954664 | 0.4288 | 0 | 0 | 0 | 1 Ref      |
| MW202674 | Unassigned | Unassigned | Unassigned | 832_0  | Clustered           | 2 VC_832_0   | 2  | 0.3668 | 0.94926484 | 0.3482 | 0 | 0 | 0 | 1 Ref      |
| MW202680 | Unassigned | Unassigned | Unassigned | 1433_0 | Clustered           | 2 VC_1433_0  | 2  | 1      | 1          | 1      | 0 | 0 | 0 | 1 Ref      |
| MW202703 | Unassigned | Unassigned | Unassigned | 1299_0 | Clustered           | 53 VC_1299_0 | 53 | 0.8666 | 1          | 0.8666 | 0 | 0 | 0 | 1 Ref      |
| MW202711 | Unassigned | Unassigned | Unassigned | 629_0  | Clustered           | 4 VC_629_0   | 4  | 0.4856 | 0.99992419 | 0.4856 | 0 | 0 | 0 | 1 Ref      |
| MW202718 | Unassigned | Unassigned | Unassigned | 1517_0 | Clustered           | 3 VC_1517_0  | 3  | 1      | 0          | 0      | 0 | 0 | 0 | 1 Ref      |
| MW202722 | Unassigned | Unassigned | Unassigned | 546_0  | Clustered           | 3 VC_546_0   | 3  | 0.1718 | 0.99838527 | 0.1715 | 0 | 0 | 0 | 1 Ref      |
| MW202725 | Unassigned | Unassigned | Unassigned | 1519_0 | Clustered           | 5 VC_1519_0  | 5  | 1      | 1          | 1      | 0 | 0 | 0 | 1 Ref      |
| MW202732 | Unassigned | Unassigned | Unassigned | 206_0  | Clustered           | 28 VC_206_0  | 28 | 0.2427 | 0.99971175 | 0.2426 | 0 | 0 | 0 | 1 Ref      |
| MW202738 | Unassigned | Unassigned | Unassigned | 545_0  | Clustered           | 3 VC_545_0   | 3  | 0.2336 | 0.99839891 | 0.2332 | 0 | 0 | 0 | 1 Ref      |
| MW202742 | Unassigned | Unassigned | Unassigned | 1516_0 | Clustered           | 4 VC_1516_0  | 4  | 0.9888 | 0.9933271  | 0.9822 | 0 | 0 | 0 | 1 Ref      |
| MW202743 | Unassigned | Unassigned | Unassigned | 1517_0 | Clustered           | 3 VC_1517_0  | 3  | 1      | 0          | 0      | 0 | 0 | 0 | 1 Ref      |
| MW202744 | Unassigned | Unassigned | Unassigned | 119_0  | Clustered           | 9 VC_119_0   | 9  | 0.9977 | 0.98988637 | 0.9876 | 0 | 0 | 0 | 1 Ref      |
| MW202748 | Unassigned | Unassigned | Unassigned | 1513_0 | Clustered           | 2 VC_1513_0  | 2  | 0.967  | 0.86822376 | 0.8396 | 0 | 0 | 0 | 1 Ref      |
| MW202753 | Unassigned | Unassigned | Unassigned | 1523_0 | Clustered           | 2 VC_1523_0  | 2  | 1      | 1          | 1      | 0 | 0 | 0 | 1 Ref      |
| MW202760 | Unassigned | Unassigned | Unassigned | 1119_0 | Clustered           | 48 VC_1119_0 | 48 | 0.852  | 1          | 0.852  | 0 | 0 | 0 | 1 Ref      |
| MW202766 | Unassigned | Unassigned | Unassigned | 1515_0 | Clustered           | 3 VC_1515_0  | 3  | 1      | 0          | 0      | 0 | 0 | 0 | 1 Ref      |
| MW202777 | Unassigned | Unassigned | Unassigned | 480_0  | Clustered           | 3 VC_480_0   | 3  | 0.3096 | 0.99749973 | 0.3088 | 0 | 0 | 0 | 1 Ref      |
| MW202785 | Unassigned | Unassigned | Unassigned | 777_0  | Clustered           | 3 VC_777_0   | 3  | 0.692  | 0.95335502 | 0.6597 | 0 | 0 | 0 | 1 Ref      |
| MW202789 | Unassigned | Unassigned | Unassigned | 1514_0 | Clustered           | 2 VC_1514_0  | 2  | 0.8601 | 0.76024994 | 0.6539 | 0 | 0 | 0 | 1 Ref      |
| MW202796 | Unassigned | Unassigned | Unassigned | 777_0  | Clustered           | 3 VC_777_0   | 3  | 0.692  | 0.95335502 | 0.6597 | 0 | 0 | 0 | 1 Ref      |
| MW202812 | Unassigned | Unassigned | Unassigned | 1519_0 | Clustered           | 5 VC_1519_0  | 5  | 1      | 1          | 1      | 0 | 0 | 0 | 1 Ref      |
| MW202819 | Unassigned | Unassigned | Unassigned | 1119_0 | Clustered           | 48 VC_1119_0 | 48 | 0.852  | 1          | 0.852  | 0 | 0 | 0 | 1 Ref      |
| MW202824 | Unassigned | Unassigned | Unassigned | 1299_0 | Clustered           | 53 VC_1299_0 | 53 | 0.8666 | 1          | 0.8666 | 0 | 0 | 0 | 1 Ref      |
| MW202825 | Unassigned | Unassigned | Unassigned | 1523_0 | Clustered           | 2 VC_1523_0  | 2  | 1      | 1          | 1      | 0 | 0 | 0 | 1 Ref      |
| MW202826 | Unassigned | Unassigned | Unassigned | 1519_0 | Clustered           | 5 VC_1519_0  | 5  | 1      | 1          | 1      | 0 | 0 | 0 | 1 Ref      |
| MW202842 | Unassigned | Unassigned | Unassigned | 1519_0 | Clustered           | 5 VC_1519_0  | 5  | 1      | 1          | 1      | 0 | 0 | 0 | 1 Ref      |
| MW202843 | Unassigned | Unassigned | Unassigned | 1521_0 | Clustered           | 3 VC_1521_0  | 3  | 1      | 1          | 1      | 0 | 0 | 0 | 1 Ref      |
| MW202847 | Unassigned | Unassigned | Unassigned | 1028_0 | Clustered           | 69 VC_1028_0 | 69 | 0.8547 | 1          | 0.8547 | 0 | 0 | 0 | 1 Ref      |
| MW202852 | Unassigned | Unassigned | Unassigned | 1521_0 | Clustered           | 3 VC_1521_0  | 3  | 1      | 1          | 1      | 0 | 0 | 0 | 1 Ref      |
| MW202853 | Unassigned | Unassigned | Unassigned | 1028_0 | Clustered           | 69 VC_1028_0 | 69 | 0.8547 | 1          | 0.8547 | 0 | 0 | 0 | 1 Ref      |
| MW202864 | Unassigned | Unassigned | Unassigned | 1522_0 | Clustered           | 2 VC_1522_0  | 2  | 1      | 1          | 1      | 0 | 0 | 0 | 1 Ref      |
| MW202867 | Unassigned | Unassigned | Unassigned | 169_0  | Clustered           | 2 VC_169_0   | 2  | 0.2842 | 0.94006209 | 0.2672 | 0 | 0 | 0 | 1 Ref      |
| MW202879 | Unassigned | Unassigned | Unassigned | 629_0  | Clustered           | 4 VC_629_0   | 4  | 0.4856 | 0.99992419 | 0.4856 | 0 | 0 | 0 | 1 Ref      |
| MW202883 | Unassigned | Unassigned | Unassigned | 1028_0 | Clustered           | 69 VC_1028_0 | 69 | 0.8547 | 1          | 0.8547 | 0 | 0 | 0 | 1 Ref      |
| MW202889 | Unassigned | Unassigned | Unassigned | 206_0  | Clustered           | 28 VC_206_0  | 28 | 0.2427 | 0.99971175 | 0.2426 | 0 | 0 | 0 | 1 Ref      |
| MW202895 | Unassigned | Unassigned | Unassigned | 337_0  | Clustered/Singleton | 1 VC_337_0   | 1  | 0      | 1          | 0      | 0 | 0 | 0 | 1 Ref      |
| MW205203 | Unassigned | Unassigned | Unassigned | 492_0  | Clustered           | 20 VC_492_0  | 20 | 0.7887 | 1          | 0.7887 | 0 | 0 | 0 | 1 Ref      |
| MW206381 | Unassigned | Unassigned | Unassigned | 199_25 | Clustered/Singleton | 1 VC_199_25  | 1  | 0      | 1          | 0      | 0 | 0 | 0 | 1 Ref      |
| MW217515 | Unassigned | Unassigned | Unassigned | 548_0  | Clustered           | 9 VC_548_0   | 9  | 0.8018 | 1          | 0.8018 | 0 | 0 | 0 | 1 Ref      |
| MW218148 | Unassigned | Unassigned | Unassigned | 463_0  | Clustered           | 7 VC_463_0   | 7  | 0.5971 | 1          | 0.5971 | 0 | 0 | 0 | 1 Ref      |
| MW233709 | Unassigned | Unassigned | Unassigned | 297_0  | Clustered           | 10 VC_297_0  | 10 | 0.0971 | 1          | 0.0971 | 0 | 0 | 0 | 1 Ref      |
| MW238767 | Unassigned | Unassigned | Unassigned | 12_0   | Clustered           | 21 VC_12_0   | 21 | 0.2262 | 1          | 0.2262 | 0 | 0 | 0 | 0.9571 Ref |
| MW239157 | Unassigned | Unassigned | Unassigned | 509_0  | Clustered           | 36 VC_509_0  | 36 | 0.5291 | 1          | 0.5291 | 0 | 0 | 0 | 0.9714 Ref |
| MW247144 | Unassigned | Unassigned | Unassigned | 101_0  | Clustered           | 32 VC_101_0  | 32 | 0.8826 | 1          | 0.8826 | 0 | 0 | 0 | 1 Ref      |
| MW247145 | Unassigned | Unassigned | Unassigned | 101_0  | Clustered           | 32 VC_101_0  | 32 | 0.8826 | 1          | 0.8826 | 0 | 0 | 0 | 1 Ref      |



|          |            |            |            |         |                     |              |     |        |            |        |   |   |   |            |
|----------|------------|------------|------------|---------|---------------------|--------------|-----|--------|------------|--------|---|---|---|------------|
| MW247147 | Unassigned | Unassigned | Unassigned | 101_0   | Clustered           | 32 VC_101_0  | 32  | 0.8826 | 1          | 0.8826 | 0 | 0 | 0 | 1 Ref      |
| MW248466 | Unassigned | Unassigned | Unassigned | 463_0   | Clustered           | 7 VC_463_0   | 7   | 0.5971 | 1          | 0.5971 | 0 | 0 | 0 | 1 Ref      |
| MW250275 | Unassigned | Unassigned | Unassigned | 162_0   | Clustered           | 12 VC_162_0  | 12  | 0.9051 | 1          | 0.9051 | 0 | 0 | 0 | 1 Ref      |
| MW250276 | Unassigned | Unassigned | Unassigned | 907_0   | Clustered           | 32 VC_907_0  | 32  | 0.9964 | 1          | 0.9964 | 0 | 0 | 0 | 1 Ref      |
| MW250641 | Unassigned | Unassigned | Unassigned | 861_0   | Clustered           | 29 VC_861_0  | 29  | 0.9954 | 1          | 0.9954 | 0 | 0 | 0 | 1 Ref      |
| MW250785 | Unassigned | Unassigned | Unassigned | 687_0   | Clustered           | 21 VC_687_0  | 21  | 0.3608 | 1          | 0.3608 | 0 | 0 | 0 | 1 Ref      |
| MW250786 | Unassigned | Unassigned | Unassigned | 873_9   | Clustered/Singleton | 1 VC_873_9   | 1   | 0      | 1          | 0      | 0 | 0 | 0 | 1 Ref      |
| MW250787 | Unassigned | Unassigned | Unassigned | 297_0   | Clustered           | 10 VC_297_0  | 10  | 0.0971 | 1          | 0.0971 | 0 | 0 | 0 | 1 Ref      |
| MW258709 | Unassigned | Unassigned | Unassigned | 465_0   | Clustered           | 80 VC_465_0  | 80  | 0.9988 | 1          | 0.9988 | 0 | 0 | 0 | 1 Ref      |
| MW258710 | Unassigned | Unassigned | Unassigned | 721_0   | Clustered           | 11 VC_721_0  | 11  | 0.8846 | 1          | 0.8846 | 0 | 0 | 0 | 1 Ref      |
| MW258711 | Unassigned | Unassigned | Unassigned | 721_0   | Clustered           | 11 VC_721_0  | 11  | 0.8846 | 1          | 0.8846 | 0 | 0 | 0 | 1 Ref      |
| MW269554 | Unassigned | Unassigned | Unassigned | 614_0   | Clustered           | 4 VC_614_0   | 4   | 0.0588 | 0.99274182 | 0.0584 | 0 | 0 | 0 | 1 Ref      |
| MW269952 | Unassigned | Unassigned | Unassigned | 297_1   | Clustered           | 8 VC_297_1   | 8   | 0.0749 | 1          | 0.0749 | 0 | 0 | 0 | 0.8571 Ref |
| MW272540 | Unassigned | Unassigned | Unassigned | 457_2   | Clustered           | 2 VC_457_2   | 2   | 0.0288 | 0.87707845 | 0.0253 | 0 | 0 | 0 | 1 Ref      |
| MW273920 | Unassigned | Unassigned | Unassigned | 502_0   | Clustered           | 18 VC_502_0  | 18  | 0.8808 | 1          | 0.8808 | 0 | 0 | 0 | 1 Ref      |
| MW273922 | Unassigned | Unassigned | Unassigned | 502_0   | Clustered           | 18 VC_502_0  | 18  | 0.8808 | 1          | 0.8808 | 0 | 0 | 0 | 1 Ref      |
| MW273923 | Unassigned | Unassigned | Unassigned | 502_0   | Clustered           | 18 VC_502_0  | 18  | 0.8808 | 1          | 0.8808 | 0 | 0 | 0 | 1 Ref      |
| MW273924 | Unassigned | Unassigned | Unassigned | 502_0   | Clustered           | 18 VC_502_0  | 18  | 0.8808 | 1          | 0.8808 | 0 | 0 | 0 | 1 Ref      |
| MW273925 | Unassigned | Unassigned | Unassigned | 502_0   | Clustered           | 18 VC_502_0  | 18  | 0.8808 | 1          | 0.8808 | 0 | 0 | 0 | 1 Ref      |
| MW273926 | Unassigned | Unassigned | Unassigned | 502_0   | Clustered           | 18 VC_502_0  | 18  | 0.8808 | 1          | 0.8808 | 0 | 0 | 0 | 1 Ref      |
| MW281503 | Unassigned | Unassigned | Unassigned | 912_1   | Clustered           | 12 VC_912_1  | 12  | 0.2423 | 1          | 0.2423 | 0 | 0 | 0 | 1 Ref      |
| MW286156 | Unassigned | Unassigned | Unassigned | 469_0   | Clustered           | 18 VC_469_0  | 18  | 0.4583 | 1          | 0.4583 | 0 | 0 | 0 | 1 Ref      |
| MW286157 | Unassigned | Unassigned | Unassigned | 290_7   | Clustered/Singleton | 1 VC_290_7   | 1   | 0      | 1          | 0      | 0 | 0 | 0 | 1 Ref      |
| MW286254 | Unassigned | Unassigned | Unassigned | 98_0    | Clustered           | 30 VC_98_0   | 30  | 0.7175 | 1          | 0.7175 | 0 | 0 | 0 | 1 Ref      |
| MW291012 | Unassigned | Unassigned | Unassigned | 579_65  | Clustered           | 2 VC_579_65  | 2   | 0.0032 | 0.60938642 | 0.0019 | 0 | 0 | 0 | 1 Ref      |
| MW291013 | Unassigned | Unassigned | Unassigned | 1216_0  | Clustered           | 22 VC_1216_0 | 22  | 0.4546 | 1          | 0.4546 | 0 | 0 | 0 | 1 Ref      |
| MW291014 | Unassigned | Unassigned | Unassigned | 1114_0  | Clustered           | 20 VC_1114_0 | 20  | 0.3238 | 1          | 0.3238 | 0 | 0 | 0 | 0.9842 Ref |
| MW291015 | Unassigned | Unassigned | Unassigned | 989_0   | Clustered           | 13 VC_989_0  | 13  | 0.8622 | 1          | 0.8622 | 0 | 0 | 0 | 1 Ref      |
| MW291016 | Unassigned | Unassigned | Unassigned | 1217_0  | Clustered           | 41 VC_1217_0 | 41  | 0.9546 | 1          | 0.9546 | 0 | 0 | 0 | 0.9976 Ref |
| MW291018 | Unassigned | Unassigned | Unassigned | 1424_0  | Clustered           | 31 VC_1424_0 | 31  | 0.8834 | 1          | 0.8834 | 0 | 0 | 0 | 1 Ref      |
| MW291019 | Unassigned | Unassigned | Unassigned | 535_1   | Clustered           | 108 VC_535_1 | 108 | 0.8479 | 1          | 0.8479 | 0 | 0 | 0 | 0.9955 Ref |
| MW291020 | Unassigned | Unassigned | Unassigned | 1407_0  | Clustered           | 78 VC_1407_0 | 78  | 0.9731 | 1          | 0.9731 | 0 | 0 | 0 | 1 Ref      |
| MW291021 | Unassigned | Unassigned | Unassigned | 1199_0  | Clustered           | 3 VC_1199_0  | 3   | 0.3136 | 0.99425123 | 0.3118 | 0 | 0 | 0 | 1 Ref      |
| MW291022 | Unassigned | Unassigned | Unassigned | 898_1   | Clustered           | 27 VC_898_1  | 27  | 0.8894 | 1          | 0.8894 | 0 | 0 | 0 | 1 Ref      |
| MW291023 | Unassigned | Unassigned | Unassigned | 571_0   | Clustered           | 16 VC_571_0  | 16  | 0.091  | 1          | 0.091  | 0 | 0 | 0 | 0.6667 Ref |
| MW291024 | Unassigned | Unassigned | Unassigned | 918_0   | Clustered           | 16 VC_918_0  | 16  | 0.2945 | 1          | 0.2945 | 0 | 0 | 0 | 1 Ref      |
| MW291025 | Unassigned | Unassigned | Unassigned | 1406_0  | Clustered           | 21 VC_1406_0 | 21  | 0.9836 | 1          | 0.9836 | 0 | 0 | 0 | 1 Ref      |
| MW291026 | Unassigned | Unassigned | Unassigned | 1296_0  | Clustered           | 82 VC_1296_0 | 82  | 0.7938 | 1          | 0.7938 | 0 | 0 | 0 | 1 Ref      |
| MW291027 | Unassigned | Unassigned | Unassigned | 991_0   | Clustered           | 39 VC_991_0  | 39  | 1      | 1          | 1      | 0 | 0 | 0 | 1 Ref      |
| MW291028 | Unassigned | Unassigned | Unassigned | 783_0   | Clustered           | 67 VC_783_0  | 67  | 0.8945 | 1          | 0.8945 | 0 | 0 | 0 | 1 Ref      |
| MW296032 | Unassigned | Unassigned | Unassigned | 836_0   | Clustered           | 3 VC_836_0   | 3   | 0.1157 | 0.99842379 | 0.1155 | 0 | 0 | 0 | 1 Ref      |
| MW296865 | Unassigned | Unassigned | Unassigned | 340_18  | Clustered           | 7 VC_340_18  | 7   | 0.0326 | 1          | 0.0326 | 0 | 0 | 0 | 0.8095 Ref |
| MW296877 | Unassigned | Unassigned | Unassigned | 398_0   | Clustered           | 51 VC_398_0  | 51  | 0.8741 | 1          | 0.8741 | 0 | 0 | 0 | 1 Ref      |
| MW302330 | Unassigned | Unassigned | Unassigned | 673_0   | Clustered           | 4 VC_673_0   | 4   | 0.2891 | 0.99998263 | 0.2891 | 0 | 0 | 0 | 1 Ref      |
| MW311372 | Unassigned | Unassigned | Unassigned | 340_11  | Clustered           | 15 VC_340_11 | 15  | 0.079  | 1          | 0.079  | 0 | 0 | 0 | 0.9333 Ref |
| MW314138 | Unassigned | Unassigned | Unassigned | 854_0   | Clustered           | 6 VC_854_0   | 6   | 0.514  | 1          | 0.514  | 0 | 0 | 0 | 1 Ref      |
| MW314845 | Unassigned | Unassigned | Unassigned | 577_0   | Clustered           | 21 VC_577_0  | 21  | 0.9908 | 1          | 0.9908 | 0 | 0 | 0 | 1 Ref      |
| MW314846 | Unassigned | Unassigned | Unassigned | 566_1   | Clustered           | 2 VC_566_1   | 2   | 0.0136 | 0.68880023 | 0.0093 | 0 | 0 | 0 | 1 Ref      |
| MW314847 | Unassigned | Unassigned | Unassigned | 1138_0  | Clustered           | 16 VC_1138_0 | 16  | 0.4566 | 1          | 0.4566 | 0 | 0 | 0 | 1 Ref      |
| MW314848 | Unassigned | Unassigned | Unassigned | 1200_0  | Clustered           | 73 VC_1200_0 | 73  | 0.9825 | 1          | 0.9825 | 0 | 0 | 0 | 1 Ref      |
| MW314851 | Unassigned | Unassigned | Unassigned | 1135_0  | Clustered           | 12 VC_1135_0 | 12  | 0.888  | 1          | 0.888  | 0 | 0 | 0 | 1 Ref      |
| MW314852 | Unassigned | Unassigned | Unassigned | 575_0   | Clustered           | 13 VC_575_0  | 13  | 0.7491 | 1          | 0.7491 | 0 | 0 | 0 | 1 Ref      |
| MW314853 | Unassigned | Unassigned | Unassigned | 1135_0  | Clustered           | 12 VC_1135_0 | 12  | 0.888  | 1          | 0.888  | 0 | 0 | 0 | 1 Ref      |
| MW314854 | Unassigned | Unassigned | Unassigned | 534_0   | Clustered           | 3 VC_534_0   | 3   | 0.4527 | 0.99856909 | 0.452  | 0 | 0 | 0 | 1 Ref      |
| MW314855 | Unassigned | Unassigned | Unassigned | 570_0   | Clustered           | 12 VC_570_0  | 12  | 0.8    | 1          | 0.8    | 0 | 0 | 0 | 1 Ref      |
| MW314856 | Unassigned | Unassigned | Unassigned | 570_0   | Clustered           | 12 VC_570_0  | 12  | 0.8    | 1          | 0.8    | 0 | 0 | 0 | 1 Ref      |
| MW314857 | Unassigned | Unassigned | Unassigned | 1135_0  | Clustered           | 12 VC_1135_0 | 12  | 0.888  | 1          | 0.888  | 0 | 0 | 0 | 1 Ref      |
| MW314858 | Unassigned | Unassigned | Unassigned | 570_0   | Clustered           | 12 VC_570_0  | 12  | 0.8    | 1          | 0.8    | 0 | 0 | 0 | 1 Ref      |
| MW314859 | Unassigned | Unassigned | Unassigned | 247_0   | Clustered           | 4 VC_247_0   | 4   | 0.7726 | 0.99998265 | 0.7725 | 0 | 0 | 0 | 1 Ref      |
| MW316731 | Unassigned | Unassigned | Unassigned | 717_0   | Clustered           | 5 VC_717_0   | 5   | 0.7757 | 0.99999988 | 0.7757 | 0 | 0 | 0 | 1 Ref      |
| MW316732 | Unassigned | Unassigned | Unassigned | 717_0   | Clustered           | 5 VC_717_0   | 5   | 0.7757 | 0.99999988 | 0.7757 | 0 | 0 | 0 | 1 Ref      |
| MW316733 | Unassigned | Unassigned | Unassigned | 717_0   | Clustered           | 5 VC_717_0   | 5   | 0.7757 | 0.99999988 | 0.7757 | 0 | 0 | 0 | 1 Ref      |
| MW321605 | Unassigned | Unassigned | Unassigned | 340_11  | Clustered           | 15 VC_340_11 | 15  | 0.079  | 1          | 0.079  | 0 | 0 | 0 | 0.9333 Ref |
| MW321655 | Unassigned | Unassigned | Unassigned | 1407_0  | Clustered           | 78 VC_1407_0 | 78  | 0.9731 | 1          | 0.9731 | 0 | 0 | 0 | 1 Ref      |
| MW329986 | Unassigned | Unassigned | Unassigned | 486_0   | Clustered           | 47 VC_486_0  | 47  | 0.9022 | 1          | 0.9022 | 0 | 0 | 0 | 1 Ref      |
| MW331437 | Unassigned | Unassigned | Unassigned | 655_0   | Clustered           | 45 VC_655_0  | 45  | 0.7722 | 1          | 0.7722 | 0 | 0 | 0 | 1 Ref      |
| MW331544 | Unassigned | Unassigned | Unassigned | 861_0   | Clustered           | 29 VC_861_0  | 29  | 0.9954 | 1          | 0.9954 | 0 | 0 | 0 | 1 Ref      |
| MW341595 | Unassigned | Unassigned | Unassigned | 290_144 | Clustered/Singleton | 1 VC_290_144 | 1   | 0      | 1          | 0      | 0 | 0 | 0 | 1 Ref      |
| MW343794 | Unassigned | Unassigned | Unassigned | 836_2   | Clustered           | 2 VC_836_2   | 2   | 0.0659 | 0.95518138 | 0.063  | 0 | 0 | 0 | 1 Ref      |
| MW344054 | Unassigned | Unassigned | Unassigned | 1007_1  | Clustered           | 24 VC_1007_1 | 24  | 0.7364 | 1          | 0.7364 | 0 | 0 | 0 | 0.8877 Ref |
| MW344055 | Unassigned | Unassigned | Unassigned | 1007_1  | Clustered           | 24 VC_1007_1 | 24  | 0.7364 | 1          | 0.7364 | 0 | 0 | 0 | 0.8877 Ref |
| MW344056 | Unassigned | Unassigned | Unassigned | 1007_1  | Clustered           | 24 VC_1007_1 | 24  | 0.7364 | 1          | 0.7364 | 0 | 0 | 0 | 0.8877 Ref |
| MW344764 | Unassigned | Unassigned | Unassigned | 858_0   | Clustered           | 7 VC_858_0   | 7   | 1      | 1          | 1      | 0 | 0 | 0 | 1 Ref      |
| MW344765 | Unassigned | Unassigned | Unassigned | 363_0   | Clustered           | 3 VC_363_0   | 3   | 0.8866 | 0.98155579 | 0.8702 | 0 | 0 | 0 | 1 Ref      |
| MW344766 | Unassigned | Unassigned | Unassigned | 858_0   | Clustered           | 7 VC_858_0   | 7   | 1      | 1          | 1      | 0 | 0 | 0 | 1 Ref      |
| MW344767 | Unassigned | Unassigned | Unassigned | 996_0   | Clustered           | 3 VC_996_0   | 3   | 0.6852 | 0.9859071  | 0.6755 | 0 | 0 | 0 | 1 Ref      |
| MW345241 | Unassigned | Unassigned | Unassigned | 714_0   | Clustered           | 71 VC_714_0  | 71  | 0.935  | 1          | 0.935  | 0 | 0 | 0 | 1 Ref      |
| MW345254 | Unassigned | Unassigned | Unassigned | 465_0   | Clustered           | 80 VC_465_0  | 80  | 0.9988 | 1          | 0.9988 | 0 | 0 | 0 | 1 Ref      |
| MW348917 | Unassigned | Unassigned | Unassigned | 843_0   | Clustered           | 20 VC_843_0  | 20  | 0.9621 | 1          | 0.9621 | 0 | 0 | 0 | 1 Ref      |
| MW349128 | Unassigned | Unassigned | Unassigned | 463_0   | Clustered           | 7 VC_463_0   | 7   | 0.5971 | 1          | 0.5971 | 0 | 0 | 0 | 1 Ref      |
| MW349129 | Unassigned | Unassigned | Unassigned | 463_0   | Clustered           | 7 VC_463_0   | 7   | 0.5971 | 1          | 0.5971 | 0 | 0 | 0 | 1 Ref      |



|          |            |            |            |        |                     |              |     |        |            |        |   |   |   |            |
|----------|------------|------------|------------|--------|---------------------|--------------|-----|--------|------------|--------|---|---|---|------------|
| MW349133 | Unassigned | Unassigned | Unassigned | 715_0  | Clustered           | 10 VC_715_0  | 10  | 0.8045 | 1          | 0.8045 | 0 | 0 | 0 | 1 Ref      |
| MW349138 | Unassigned | Unassigned | Unassigned | 816_0  | Clustered           | 35 VC_816_0  | 35  | 0.9824 | 1          | 0.9824 | 0 | 0 | 0 | 1 Ref      |
| MW353166 | Unassigned | Unassigned | Unassigned | 1524_0 | Clustered           | 7 VC_1524_0  | 7   | 0.9117 | 0.99951341 | 0.9113 | 0 | 0 | 0 | 1 Ref      |
| MW353167 | Unassigned | Unassigned | Unassigned | 1524_0 | Clustered           | 7 VC_1524_0  | 7   | 0.9117 | 0.99951341 | 0.9113 | 0 | 0 | 0 | 1 Ref      |
| MW353168 | Unassigned | Unassigned | Unassigned | 1524_0 | Clustered           | 7 VC_1524_0  | 7   | 0.9117 | 0.99951341 | 0.9113 | 0 | 0 | 0 | 1 Ref      |
| MW353169 | Unassigned | Unassigned | Unassigned | 1524_0 | Clustered           | 7 VC_1524_0  | 7   | 0.9117 | 0.99951341 | 0.9113 | 0 | 0 | 0 | 1 Ref      |
| MW353170 | Unassigned | Unassigned | Unassigned | 1524_0 | Clustered           | 7 VC_1524_0  | 7   | 0.9117 | 0.99951341 | 0.9113 | 0 | 0 | 0 | 1 Ref      |
| MW353171 | Unassigned | Unassigned | Unassigned | 1524_0 | Clustered           | 7 VC_1524_0  | 7   | 0.9117 | 0.99951341 | 0.9113 | 0 | 0 | 0 | 1 Ref      |
| MW353172 | Unassigned | Unassigned | Unassigned | 1524_0 | Clustered           | 7 VC_1524_0  | 7   | 0.9117 | 0.99951341 | 0.9113 | 0 | 0 | 0 | 1 Ref      |
| MW353175 | Unassigned | Unassigned | Unassigned | 523_0  | Clustered           | 3 VC_523_0   | 3   | 0.8727 | 0.96819872 | 0.845  | 0 | 0 | 0 | 1 Ref      |
| MW353176 | Unassigned | Unassigned | Unassigned | 523_0  | Clustered           | 3 VC_523_0   | 3   | 0.8727 | 0.96819872 | 0.845  | 0 | 0 | 0 | 1 Ref      |
| MW353177 | Unassigned | Unassigned | Unassigned | 523_0  | Clustered           | 3 VC_523_0   | 3   | 0.8727 | 0.96819872 | 0.845  | 0 | 0 | 0 | 1 Ref      |
| MW353181 | Unassigned | Unassigned | Unassigned | 700_0  | Clustered           | 5 VC_700_0   | 5   | 0.3898 | 0.99999995 | 0.3898 | 0 | 0 | 0 | 1 Ref      |
| MW354667 | Unassigned | Unassigned | Unassigned | 87_3   | Clustered           | 19 VC_87_3   | 19  | 0.3645 | 1          | 0.3645 | 0 | 0 | 0 | 0.807 Ref  |
| MW354668 | Unassigned | Unassigned | Unassigned | 842_0  | Clustered           | 14 VC_842_0  | 14  | 0.6581 | 1          | 0.6581 | 0 | 0 | 0 | 1 Ref      |
| MW354669 | Unassigned | Unassigned | Unassigned | 1422_0 | Clustered           | 5 VC_1422_0  | 5   | 1      | 1          | 1      | 0 | 0 | 0 | 1 Ref      |
| MW354670 | Unassigned | Unassigned | Unassigned | 842_0  | Clustered           | 14 VC_842_0  | 14  | 0.6581 | 1          | 0.6581 | 0 | 0 | 0 | 1 Ref      |
| MW354676 | Unassigned | Unassigned | Unassigned | 1422_0 | Clustered           | 5 VC_1422_0  | 5   | 1      | 1          | 1      | 0 | 0 | 0 | 1 Ref      |
| MW354677 | Unassigned | Unassigned | Unassigned | 1422_0 | Clustered           | 5 VC_1422_0  | 5   | 1      | 1          | 1      | 0 | 0 | 0 | 1 Ref      |
| MW354678 | Unassigned | Unassigned | Unassigned | 1422_0 | Clustered           | 5 VC_1422_0  | 5   | 1      | 1          | 1      | 0 | 0 | 0 | 1 Ref      |
| MW355449 | Unassigned | Unassigned | Unassigned | 611_0  | Clustered           | 50 VC_611_0  | 50  | 0.7306 | 1          | 0.7306 | 0 | 0 | 0 | 1 Ref      |
| MW355450 | Unassigned | Unassigned | Unassigned | 135_31 | Clustered           | 6 VC_135_31  | 6   | 0.0262 | 0.99999636 | 0.0262 | 0 | 0 | 0 | 1 Ref      |
| MW355451 | Unassigned | Unassigned | Unassigned | 654_1  | Clustered           | 27 VC_654_1  | 27  | 0.2571 | 1          | 0.2571 | 0 | 0 | 0 | 0.9858 Ref |
| MW355452 | Unassigned | Unassigned | Unassigned | 654_1  | Clustered           | 27 VC_654_1  | 27  | 0.2571 | 1          | 0.2571 | 0 | 0 | 0 | 0.9858 Ref |
| MW355453 | Unassigned | Unassigned | Unassigned | 654_1  | Clustered           | 27 VC_654_1  | 27  | 0.2571 | 1          | 0.2571 | 0 | 0 | 0 | 0.9858 Ref |
| MW355454 | Unassigned | Unassigned | Unassigned | 654_1  | Clustered           | 27 VC_654_1  | 27  | 0.2571 | 1          | 0.2571 | 0 | 0 | 0 | 0.9858 Ref |
| MW355455 | Unassigned | Unassigned | Unassigned | 654_1  | Clustered           | 27 VC_654_1  | 27  | 0.2571 | 1          | 0.2571 | 0 | 0 | 0 | 0.9858 Ref |
| MW355456 | Unassigned | Unassigned | Unassigned | 654_1  | Clustered           | 27 VC_654_1  | 27  | 0.2571 | 1          | 0.2571 | 0 | 0 | 0 | 0.9858 Ref |
| MW355457 | Unassigned | Unassigned | Unassigned | 654_1  | Clustered           | 27 VC_654_1  | 27  | 0.2571 | 1          | 0.2571 | 0 | 0 | 0 | 0.9858 Ref |
| MW355458 | Unassigned | Unassigned | Unassigned | 654_1  | Clustered           | 27 VC_654_1  | 27  | 0.2571 | 1          | 0.2571 | 0 | 0 | 0 | 0.9858 Ref |
| MW355459 | Unassigned | Unassigned | Unassigned | 654_1  | Clustered           | 27 VC_654_1  | 27  | 0.2571 | 1          | 0.2571 | 0 | 0 | 0 | 0.9858 Ref |
| MW355460 | Unassigned | Unassigned | Unassigned | 611_0  | Clustered           | 50 VC_611_0  | 50  | 0.7306 | 1          | 0.7306 | 0 | 0 | 0 | 1 Ref      |
| MW355461 | Unassigned | Unassigned | Unassigned | 654_1  | Clustered           | 27 VC_654_1  | 27  | 0.2571 | 1          | 0.2571 | 0 | 0 | 0 | 0.9858 Ref |
| MW355462 | Unassigned | Unassigned | Unassigned | 654_1  | Clustered           | 27 VC_654_1  | 27  | 0.2571 | 1          | 0.2571 | 0 | 0 | 0 | 0.9858 Ref |
| MW355463 | Unassigned | Unassigned | Unassigned | 654_0  | Clustered           | 115 VC_654_0 | 115 | 0.7303 | 1          | 0.7303 | 0 | 0 | 0 | 0.8764 Ref |
| MW355464 | Unassigned | Unassigned | Unassigned | 654_0  | Clustered           | 115 VC_654_0 | 115 | 0.7303 | 1          | 0.7303 | 0 | 0 | 0 | 0.8764 Ref |
| MW355465 | Unassigned | Unassigned | Unassigned | 654_0  | Clustered           | 115 VC_654_0 | 115 | 0.7303 | 1          | 0.7303 | 0 | 0 | 0 | 0.8764 Ref |
| MW355466 | Unassigned | Unassigned | Unassigned | 654_1  | Clustered           | 27 VC_654_1  | 27  | 0.2571 | 1          | 0.2571 | 0 | 0 | 0 | 0.9858 Ref |
| MW355467 | Unassigned | Unassigned | Unassigned | 611_0  | Clustered           | 50 VC_611_0  | 50  | 0.7306 | 1          | 0.7306 | 0 | 0 | 0 | 1 Ref      |
| MW355468 | Unassigned | Unassigned | Unassigned | 654_1  | Clustered           | 27 VC_654_1  | 27  | 0.2571 | 1          | 0.2571 | 0 | 0 | 0 | 0.9858 Ref |
| MW355469 | Unassigned | Unassigned | Unassigned | 654_1  | Clustered           | 27 VC_654_1  | 27  | 0.2571 | 1          | 0.2571 | 0 | 0 | 0 | 0.9858 Ref |
| MW355470 | Unassigned | Unassigned | Unassigned | 611_0  | Clustered           | 50 VC_611_0  | 50  | 0.7306 | 1          | 0.7306 | 0 | 0 | 0 | 1 Ref      |
| MW355471 | Unassigned | Unassigned | Unassigned | 654_1  | Clustered           | 27 VC_654_1  | 27  | 0.2571 | 1          | 0.2571 | 0 | 0 | 0 | 0.9858 Ref |
| MW355472 | Unassigned | Unassigned | Unassigned | 654_1  | Clustered           | 27 VC_654_1  | 27  | 0.2571 | 1          | 0.2571 | 0 | 0 | 0 | 0.9858 Ref |
| MW355473 | Unassigned | Unassigned | Unassigned | 654_1  | Clustered           | 27 VC_654_1  | 27  | 0.2571 | 1          | 0.2571 | 0 | 0 | 0 | 0.9858 Ref |
| MW355474 | Unassigned | Unassigned | Unassigned | 611_0  | Clustered           | 50 VC_611_0  | 50  | 0.7306 | 1          | 0.7306 | 0 | 0 | 0 | 1 Ref      |
| MW355475 | Unassigned | Unassigned | Unassigned | 135_31 | Clustered           | 6 VC_135_31  | 6   | 0.0262 | 0.99999636 | 0.0262 | 0 | 0 | 0 | 1 Ref      |
| MW355476 | Unassigned | Unassigned | Unassigned | 611_0  | Clustered           | 50 VC_611_0  | 50  | 0.7306 | 1          | 0.7306 | 0 | 0 | 0 | 1 Ref      |
| MW355477 | Unassigned | Unassigned | Unassigned | 135_31 | Clustered           | 6 VC_135_31  | 6   | 0.0262 | 0.99999636 | 0.0262 | 0 | 0 | 0 | 1 Ref      |
| MW355478 | Unassigned | Unassigned | Unassigned | 135_28 | Clustered           | 3 VC_135_28  | 3   | 0.0105 | 0.97349514 | 0.0102 | 0 | 0 | 0 | 0.6667 Ref |
| MW355479 | Unassigned | Unassigned | Unassigned | 611_0  | Clustered           | 50 VC_611_0  | 50  | 0.7306 | 1          | 0.7306 | 0 | 0 | 0 | 1 Ref      |
| MW355480 | Unassigned | Unassigned | Unassigned | 30_1   | Clustered           | 53 VC_30_1   | 53  | 0.7151 | 1          | 0.7151 | 0 | 0 | 0 | 0.9325 Ref |
| MW357609 | Unassigned | Unassigned | Unassigned | 199_19 | Clustered           | 12 VC_199_19 | 12  | 0.0651 | 1          | 0.0651 | 0 | 0 | 0 | 0.8636 Ref |
| MW358927 | Unassigned | Unassigned | Unassigned | 295_0  | Clustered           | 3 VC_295_0   | 3   | 0.0411 | 0.99856241 | 0.041  | 0 | 0 | 0 | 1 Ref      |
| MW358928 | Unassigned | Unassigned | Unassigned | 409_0  | Clustered           | 2 VC_409_0   | 2   | 0.0697 | 0.95760775 | 0.0667 | 0 | 0 | 0 | 1 Ref      |
| MW358930 | Unassigned | Unassigned | Unassigned | 114_0  | Clustered           | 8 VC_114_0   | 8   | 0.2518 | 1          | 0.2518 | 0 | 0 | 0 | 1 Ref      |
| MW358931 | Unassigned | Unassigned | Unassigned | 403_0  | Clustered           | 4 VC_403_0   | 4   | 0.0462 | 0.99998824 | 0.0462 | 0 | 0 | 0 | 1 Ref      |
| MW362867 | Unassigned | Unassigned | Unassigned | 340_11 | Clustered           | 15 VC_340_11 | 15  | 0.079  | 1          | 0.079  | 0 | 0 | 0 | 0.9333 Ref |
| MW363798 | Unassigned | Unassigned | Unassigned | 159_0  | Clustered           | 25 VC_159_0  | 25  | 0.7699 | 1          | 0.7699 | 0 | 0 | 0 | 1 Ref      |
| MW363799 | Unassigned | Unassigned | Unassigned | 98_0   | Clustered           | 30 VC_98_0   | 30  | 0.7175 | 1          | 0.7175 | 0 | 0 | 0 | 1 Ref      |
| MW365946 | Unassigned | Unassigned | Unassigned | 1212_0 | Clustered           | 21 VC_1212_0 | 21  | 0.711  | 1          | 0.711  | 0 | 0 | 0 | 1 Ref      |
| MW365947 | Unassigned | Unassigned | Unassigned | 1424_0 | Clustered           | 31 VC_1424_0 | 31  | 0.8834 | 1          | 0.8834 | 0 | 0 | 0 | 1 Ref      |
| MW365948 | Unassigned | Unassigned | Unassigned | 1424_0 | Clustered           | 31 VC_1424_0 | 31  | 0.8834 | 1          | 0.8834 | 0 | 0 | 0 | 1 Ref      |
| MW365949 | Unassigned | Unassigned | Unassigned | 1212_0 | Clustered           | 21 VC_1212_0 | 21  | 0.711  | 1          | 0.711  | 0 | 0 | 0 | 1 Ref      |
| MW365950 | Unassigned | Unassigned | Unassigned | 1212_0 | Clustered           | 21 VC_1212_0 | 21  | 0.711  | 1          | 0.711  | 0 | 0 | 0 | 1 Ref      |
| MW365951 | Unassigned | Unassigned | Unassigned | 1016_0 | Clustered           | 62 VC_1016_0 | 62  | 0.8638 | 1          | 0.8638 | 0 | 0 | 0 | 0.743 Ref  |
| MW365952 | Unassigned | Unassigned | Unassigned | 1115_2 | Clustered           | 5 VC_1115_2  | 5   | 0.0998 | 0.99999315 | 0.0998 | 0 | 0 | 0 | 1 Ref      |
| MW365953 | Unassigned | Unassigned | Unassigned | 1016_0 | Clustered           | 62 VC_1016_0 | 62  | 0.8638 | 1          | 0.8638 | 0 | 0 | 0 | 0.743 Ref  |
| MW366783 | Unassigned | Unassigned | Unassigned | 714_0  | Clustered           | 71 VC_714_0  | 71  | 0.935  | 1          | 0.935  | 0 | 0 | 0 | 1 Ref      |
| MW366784 | Unassigned | Unassigned | Unassigned | 714_0  | Clustered           | 71 VC_714_0  | 71  | 0.935  | 1          | 0.935  | 0 | 0 | 0 | 1 Ref      |
| MW366843 | Unassigned | Unassigned | Unassigned | 68_0   | Clustered           | 2 VC_68_0    | 2   | 0.0139 | 0.69357611 | 0.0097 | 0 | 0 | 0 | 1 Ref      |
| MW367417 | Unassigned | Unassigned | Unassigned | 873_8  | Clustered/Singleton | 1 VC_873_8   | 1   | 0      | 1          | 0      | 0 | 0 | 0 | 1 Ref      |
| MW367418 | Unassigned | Unassigned | Unassigned | 399_0  | Clustered           | 49 VC_399_0  | 49  | 0.7927 | 1          | 0.7927 | 0 | 0 | 0 | 1 Ref      |
| MW367898 | Unassigned | Unassigned | Unassigned | 295_3  | Clustered           | 3 VC_295_3   | 3   | 0.0443 | 0.99844642 | 0.0442 | 0 | 0 | 0 | 1 Ref      |
| MW380983 | Unassigned | Unassigned | Unassigned | 817_0  | Clustered           | 12 VC_817_0  | 12  | 0.8497 | 1          | 0.8497 | 0 | 0 | 0 | 1 Ref      |
| MW380984 | Unassigned | Unassigned | Unassigned | 817_0  | Clustered           | 12 VC_817_0  | 12  | 0.8497 | 1          | 0.8497 | 0 | 0 | 0 | 1 Ref      |
| MW380985 | Unassigned | Unassigned | Unassigned | 817_0  | Clustered           | 12 VC_817_0  | 12  | 0.8497 | 1          | 0.8497 | 0 | 0 | 0 | 1 Ref      |
| MW384823 | Unassigned | Unassigned | Unassigned | 994_1  | Clustered           | 8 VC_994_1   | 8   | 0.0877 | 0.92136649 | 0.0808 | 0 | 0 | 0 | 1 Ref      |
| MW385300 | Unassigned | Unassigned | Unassigned | 295_0  | Clustered           | 3 VC_295_0   | 3   | 0.0411 | 0.99856241 | 0.041  | 0 | 0 | 0 | 1 Ref      |
| MW387018 | Unassigned | Unassigned | Unassigned | 649_1  | Clustered           | 14 VC_649_1  | 14  | 0.5226 | 1          | 0.5226 | 0 | 0 | 0 | 0.8352 Ref |
| MW388001 | Unassigned | Unassigned | Unassigned | 510_2  | Clustered           | 8 VC_510_2   | 8   | 0.122  | 0.98786574 | 0.1205 | 0 | 0 | 0 | 1 Ref      |



|          |            |            |            |        |                     |              |     |        |            |        |   |   |   |            |
|----------|------------|------------|------------|--------|---------------------|--------------|-----|--------|------------|--------|---|---|---|------------|
| MW388002 | Unassigned | Unassigned | Unassigned | 510_2  | Clustered           | 8 VC_510_2   | 8   | 0.122  | 0.98786574 | 0.1205 | 0 | 0 | 0 | 1 Ref      |
| MW388003 | Unassigned | Unassigned | Unassigned | 510_2  | Clustered           | 8 VC_510_2   | 8   | 0.122  | 0.98786574 | 0.1205 | 0 | 0 | 0 | 1 Ref      |
| MW388004 | Unassigned | Unassigned | Unassigned | 510_2  | Clustered           | 8 VC_510_2   | 8   | 0.122  | 0.98786574 | 0.1205 | 0 | 0 | 0 | 1 Ref      |
| MW388005 | Unassigned | Unassigned | Unassigned | 135_15 | Clustered           | 2 VC_135_15  | 2   | 0.0051 | 0.84262835 | 0.0043 | 0 | 0 | 0 | 1 Ref      |
| MW390886 | Unassigned | Unassigned | Unassigned | 185_0  | Clustered           | 53 VC_185_0  | 53  | 0.9153 | 1          | 0.9153 | 0 | 0 | 0 | 1 Ref      |
| MW392801 | Unassigned | Unassigned | Unassigned | 1042_0 | Clustered           | 8 VC_1042_0  | 8   | 0.7385 | 1          | 0.7385 | 0 | 0 | 0 | 1 Ref      |
| MW392802 | Unassigned | Unassigned | Unassigned | 1042_0 | Clustered           | 8 VC_1042_0  | 8   | 0.7385 | 1          | 0.7385 | 0 | 0 | 0 | 1 Ref      |
| MW392803 | Unassigned | Unassigned | Unassigned | 913_1  | Clustered           | 8 VC_913_1   | 8   | 0.1102 | 0.9989323  | 0.11   | 0 | 0 | 0 | 0.75 Ref   |
| MW393850 | Unassigned | Unassigned | Unassigned | 689_0  | Clustered           | 5 VC_689_0   | 5   | 0.5195 | 0.99999996 | 0.5195 | 0 | 0 | 0 | 1 Ref      |
| MW394389 | Unassigned | Unassigned | Unassigned | 466_0  | Clustered           | 66 VC_466_0  | 66  | 0.9246 | 1          | 0.9246 | 0 | 0 | 0 | 1 Ref      |
| MW394391 | Unassigned | Unassigned | Unassigned | 506_0  | Clustered           | 8 VC_506_0   | 8   | 0.29   | 1          | 0.29   | 0 | 0 | 0 | 1 Ref      |
| MW398869 | Unassigned | Unassigned | Unassigned | 1007_1 | Clustered           | 24 VC_1007_1 | 24  | 0.7364 | 1          | 0.7364 | 0 | 0 | 0 | 0.8877 Ref |
| MW406974 | Unassigned | Unassigned | Unassigned | 80_1   | Clustered           | 2 VC_80_1    | 2   | 0.006  | 0.95748743 | 0.0057 | 0 | 0 | 0 | 1 Ref      |
| MW406975 | Unassigned | Unassigned | Unassigned | 434_0  | Clustered           | 45 VC_434_0  | 45  | 0.9479 | 1          | 0.9479 | 0 | 0 | 0 | 1 Ref      |
| MW406976 | Unassigned | Unassigned | Unassigned | 434_0  | Clustered           | 45 VC_434_0  | 45  | 0.9479 | 1          | 0.9479 | 0 | 0 | 0 | 1 Ref      |
| MW411578 | Unassigned | Unassigned | Unassigned | 199_9  | Clustered           | 5 VC_199_9   | 5   | 0.0226 | 0.99999452 | 0.0226 | 0 | 0 | 0 | 0.7 Ref    |
| MW411580 | Unassigned | Unassigned | Unassigned | 935_2  | Clustered           | 7 VC_935_2   | 7   | 0.2837 | 1          | 0.2837 | 0 | 0 | 0 | 1 Ref      |
| MW413353 | Unassigned | Unassigned | Unassigned | 440_0  | Clustered           | 33 VC_440_0  | 33  | 0.992  | 1          | 0.992  | 0 | 0 | 0 | 1 Ref      |
| MW416012 | Unassigned | Unassigned | Unassigned | 465_0  | Clustered           | 80 VC_465_0  | 80  | 0.9988 | 1          | 0.9988 | 0 | 0 | 0 | 1 Ref      |
| MW417503 | Unassigned | Unassigned | Unassigned | 971_0  | Clustered           | 40 VC_971_0  | 40  | 0.6793 | 1          | 0.6793 | 0 | 0 | 0 | 0.9359 Ref |
| MW419084 | Unassigned | Unassigned | Unassigned | 87_1   | Clustered           | 4 VC_87_1    | 4   | 0.0501 | 0.99996692 | 0.05   | 0 | 0 | 0 | 1 Ref      |
| MW419085 | Unassigned | Unassigned | Unassigned | 87_1   | Clustered           | 4 VC_87_1    | 4   | 0.0501 | 0.99996692 | 0.05   | 0 | 0 | 0 | 1 Ref      |
| MW419086 | Unassigned | Unassigned | Unassigned | 87_1   | Clustered           | 4 VC_87_1    | 4   | 0.0501 | 0.99996692 | 0.05   | 0 | 0 | 0 | 1 Ref      |
| MW419087 | Unassigned | Unassigned | Unassigned | 87_1   | Clustered           | 4 VC_87_1    | 4   | 0.0501 | 0.99996692 | 0.05   | 0 | 0 | 0 | 1 Ref      |
| MW419910 | Unassigned | Unassigned | Unassigned | 860_0  | Clustered           | 9 VC_860_0   | 9   | 0.7723 | 1          | 0.7723 | 0 | 0 | 0 | 1 Ref      |
| MW421576 | Unassigned | Unassigned | Unassigned | 1061_0 | Clustered           | 8 VC_1061_0  | 8   | 0.8379 | 1          | 0.8379 | 0 | 0 | 0 | 1 Ref      |
| MW421577 | Unassigned | Unassigned | Unassigned | 1198_0 | Clustered           | 24 VC_1198_0 | 24  | 1      | 1          | 1      | 0 | 0 | 0 | 1 Ref      |
| MW421578 | Unassigned | Unassigned | Unassigned | 1198_0 | Clustered           | 24 VC_1198_0 | 24  | 1      | 1          | 1      | 0 | 0 | 0 | 1 Ref      |
| MW421579 | Unassigned | Unassigned | Unassigned | 1198_0 | Clustered           | 24 VC_1198_0 | 24  | 1      | 1          | 1      | 0 | 0 | 0 | 1 Ref      |
| MW421580 | Unassigned | Unassigned | Unassigned | 1198_0 | Clustered           | 24 VC_1198_0 | 24  | 1      | 1          | 1      | 0 | 0 | 0 | 1 Ref      |
| MW421581 | Unassigned | Unassigned | Unassigned | 1059_0 | Clustered           | 10 VC_1059_0 | 10  | 0.8794 | 1          | 0.8794 | 0 | 0 | 0 | 1 Ref      |
| MW421582 | Unassigned | Unassigned | Unassigned | 1059_0 | Clustered           | 10 VC_1059_0 | 10  | 0.8794 | 1          | 0.8794 | 0 | 0 | 0 | 1 Ref      |
| MW421583 | Unassigned | Unassigned | Unassigned | 1059_0 | Clustered           | 10 VC_1059_0 | 10  | 0.8794 | 1          | 0.8794 | 0 | 0 | 0 | 1 Ref      |
| MW421584 | Unassigned | Unassigned | Unassigned | 1059_0 | Clustered           | 10 VC_1059_0 | 10  | 0.8794 | 1          | 0.8794 | 0 | 0 | 0 | 1 Ref      |
| MW423797 | Unassigned | Unassigned | Unassigned | 340_16 | Clustered           | 4 VC_340_16  | 4   | 0.0157 | 0.9999807  | 0.0157 | 0 | 0 | 0 | 1 Ref      |
| MW423798 | Unassigned | Unassigned | Unassigned | 199_33 | Clustered/Singleton | 1 VC_199_33  | 1   | 0      | 1          | 0      | 0 | 0 | 0 | 1 Ref      |
| MW427215 | Unassigned | Unassigned | Unassigned | 475_0  | Clustered           | 96 VC_475_0  | 96  | 0.9303 | 1          | 0.9303 | 0 | 0 | 0 | 0.9575 Ref |
| MW430545 | Unassigned | Unassigned | Unassigned | 157_0  | Clustered           | 6 VC_157_0   | 6   | 0.0724 | 1          | 0.0724 | 0 | 0 | 0 | 1 Ref      |
| MW435853 | Unassigned | Unassigned | Unassigned | 1115_3 | Clustered           | 6 VC_1115_3  | 6   | 0.1298 | 0.99999994 | 0.1298 | 0 | 0 | 0 | 0.8667 Ref |
| MW435854 | Unassigned | Unassigned | Unassigned | 245_0  | Clustered           | 17 VC_245_0  | 17  | 0.6081 | 1          | 0.6081 | 0 | 0 | 0 | 1 Ref      |
| MW435856 | Unassigned | Unassigned | Unassigned | 1016_0 | Clustered           | 62 VC_1016_0 | 62  | 0.8638 | 1          | 0.8638 | 0 | 0 | 0 | 0.743 Ref  |
| MW435857 | Unassigned | Unassigned | Unassigned | 385_0  | Clustered           | 24 VC_385_0  | 24  | 0.5516 | 1          | 0.5516 | 0 | 0 | 0 | 1 Ref      |
| MW435858 | Unassigned | Unassigned | Unassigned | 335_47 | Clustered/Singleton | 1 VC_335_47  | 1   | 0      | 1          | 0      | 0 | 0 | 0 | 1 Ref      |
| MW435859 | Unassigned | Unassigned | Unassigned | 1296_0 | Clustered           | 82 VC_1296_0 | 82  | 0.7938 | 1          | 0.7938 | 0 | 0 | 0 | 1 Ref      |
| MW442825 | Unassigned | Unassigned | Unassigned | 1198_0 | Clustered           | 24 VC_1198_0 | 24  | 1      | 1          | 1      | 0 | 0 | 0 | 1 Ref      |
| MW442826 | Unassigned | Unassigned | Unassigned | 1198_0 | Clustered           | 24 VC_1198_0 | 24  | 1      | 1          | 1      | 0 | 0 | 0 | 1 Ref      |
| MW442827 | Unassigned | Unassigned | Unassigned | 1198_0 | Clustered           | 24 VC_1198_0 | 24  | 1      | 1          | 1      | 0 | 0 | 0 | 1 Ref      |
| MW442828 | Unassigned | Unassigned | Unassigned | 1198_0 | Clustered           | 24 VC_1198_0 | 24  | 1      | 1          | 1      | 0 | 0 | 0 | 1 Ref      |
| MW442829 | Unassigned | Unassigned | Unassigned | 1198_0 | Clustered           | 24 VC_1198_0 | 24  | 1      | 1          | 1      | 0 | 0 | 0 | 1 Ref      |
| MW442830 | Unassigned | Unassigned | Unassigned | 1198_0 | Clustered           | 24 VC_1198_0 | 24  | 1      | 1          | 1      | 0 | 0 | 0 | 1 Ref      |
| MW448170 | Unassigned | Unassigned | Unassigned | 686_0  | Clustered           | 25 VC_686_0  | 25  | 0.5501 | 1          | 0.5501 | 0 | 0 | 0 | 0.96 Ref   |
| MW448539 | Unassigned | Unassigned | Unassigned | 1198_0 | Clustered           | 24 VC_1198_0 | 24  | 1      | 1          | 1      | 0 | 0 | 0 | 1 Ref      |
| MW448540 | Unassigned | Unassigned | Unassigned | 1198_0 | Clustered           | 24 VC_1198_0 | 24  | 1      | 1          | 1      | 0 | 0 | 0 | 1 Ref      |
| MW448541 | Unassigned | Unassigned | Unassigned | 1198_0 | Clustered           | 24 VC_1198_0 | 24  | 1      | 1          | 1      | 0 | 0 | 0 | 1 Ref      |
| MW450817 | Unassigned | Unassigned | Unassigned | 317_0  | Clustered           | 33 VC_317_0  | 33  | 0.8756 | 1          | 0.8756 | 0 | 0 | 0 | 1 Ref      |
| MW451246 | Unassigned | Unassigned | Unassigned | 911_0  | Clustered           | 20 VC_911_0  | 20  | 0.9915 | 1          | 0.9915 | 0 | 0 | 0 | 1 Ref      |
| MW451247 | Unassigned | Unassigned | Unassigned | 1067_0 | Clustered           | 20 VC_1067_0 | 20  | 0.7109 | 1          | 0.7109 | 0 | 0 | 0 | 1 Ref      |
| MW451248 | Unassigned | Unassigned | Unassigned | 548_0  | Clustered           | 9 VC_548_0   | 9   | 0.8018 | 1          | 0.8018 | 0 | 0 | 0 | 1 Ref      |
| MW451250 | Unassigned | Unassigned | Unassigned | 869_0  | Clustered           | 3 VC_869_0   | 3   | 0.3287 | 0.99831497 | 0.3281 | 0 | 0 | 0 | 1 Ref      |
| MW451251 | Unassigned | Unassigned | Unassigned | 911_0  | Clustered           | 20 VC_911_0  | 20  | 0.9915 | 1          | 0.9915 | 0 | 0 | 0 | 1 Ref      |
| MW452562 | Unassigned | Unassigned | Unassigned | 791_0  | Clustered           | 2 VC_791_0   | 2   | 0.0478 | 0.95514297 | 0.0456 | 0 | 0 | 0 | 1 Ref      |
| MW452941 | Unassigned | Unassigned | Unassigned | 945_0  | Clustered           | 2 VC_945_0   | 2   | 0.0994 | 0.83429703 | 0.0829 | 0 | 0 | 0 | 1 Ref      |
| MW459163 | Unassigned | Unassigned | Unassigned | 714_0  | Clustered           | 71 VC_714_0  | 71  | 0.935  | 1          | 0.935  | 0 | 0 | 0 | 1 Ref      |
| MW460245 | Unassigned | Unassigned | Unassigned | 67_2   | Clustered/Singleton | 1 VC_67_2    | 1   | 0      | 1          | 0      | 0 | 0 | 0 | 1 Ref      |
| MW460246 | Unassigned | Unassigned | Unassigned | 553_0  | Clustered           | 3 VC_553_0   | 3   | 0.0872 | 0.99853671 | 0.0871 | 0 | 0 | 0 | 1 Ref      |
| MW460248 | Unassigned | Unassigned | Unassigned | 594_0  | Clustered           | 7 VC_594_0   | 7   | 0.2725 | 1          | 0.2725 | 0 | 0 | 0 | 1 Ref      |
| MW460250 | Unassigned | Unassigned | Unassigned | 155_8  | Clustered           | 66 VC_155_8  | 66  | 0.4537 | 1          | 0.4537 | 0 | 0 | 0 | 0.8182 Ref |
| MW462191 | Unassigned | Unassigned | Unassigned | 480_0  | Clustered           | 3 VC_480_0   | 3   | 0.3096 | 0.99749973 | 0.3088 | 0 | 0 | 0 | 1 Ref      |
| MW462221 | Unassigned | Unassigned | Unassigned | 350_0  | Clustered           | 2 VC_350_0   | 2   | 0.5215 | 0.85557782 | 0.4462 | 0 | 0 | 0 | 1 Ref      |
| MW476490 | Unassigned | Unassigned | Unassigned | 145_0  | Clustered           | 6 VC_145_0   | 6   | 0.2581 | 0.86251824 | 0.2226 | 0 | 0 | 0 | 0.8667 Ref |
| MW477480 | Unassigned | Unassigned | Unassigned | 842_0  | Clustered           | 14 VC_842_0  | 14  | 0.6581 | 1          | 0.6581 | 0 | 0 | 0 | 1 Ref      |
| MW477799 | Unassigned | Unassigned | Unassigned | 475_0  | Clustered           | 96 VC_475_0  | 96  | 0.9303 | 1          | 0.9303 | 0 | 0 | 0 | 0.9575 Ref |
| MW478290 | Unassigned | Unassigned | Unassigned | 561_0  | Clustered           | 3 VC_561_0   | 3   | 0.3411 | 0.99792547 | 0.3404 | 0 | 0 | 0 | 1 Ref      |
| MW481326 | Unassigned | Unassigned | Unassigned | 340_7  | Clustered           | 18 VC_340_7  | 18  | 0.0936 | 1          | 0.0936 | 0 | 0 | 0 | 0.7778 Ref |
| MW495853 | Unassigned | Unassigned | Unassigned | 425_0  | Clustered           | 40 VC_425_0  | 40  | 0.8399 | 1          | 0.8399 | 0 | 0 | 0 | 0.9974 Ref |
| MW505928 | Unassigned | Unassigned | Unassigned | 787_0  | Clustered           | 132 VC_787_0 | 132 | 1      | 1          | 1      | 0 | 0 | 0 | 1 Ref      |
| MW507123 | Unassigned | Unassigned | Unassigned | 335_23 | Clustered           | 17 VC_335_23 | 17  | 0.0714 | 1          | 0.0714 | 0 | 0 | 0 | 0.6397 Ref |
| MW507124 | Unassigned | Unassigned | Unassigned | 1424_0 | Clustered           | 31 VC_1424_0 | 31  | 0.8834 | 1          | 0.8834 | 0 | 0 | 0 | 1 Ref      |
| MW507125 | Unassigned | Unassigned | Unassigned | 1219_0 | Clustered           | 24 VC_1219_0 | 24  | 0.9519 | 1          | 0.9519 | 0 | 0 | 0 | 1 Ref      |
| MW507126 | Unassigned | Unassigned | Unassigned | 1209_0 | Clustered           | 2 VC_1209_0  | 2   | 0.0989 | 0.93550199 | 0.0925 | 0 | 0 | 0 | 1 Ref      |
| MW507127 | Unassigned | Unassigned | Unassigned | 1407_0 | Clustered           | 78 VC_1407_0 | 78  | 0.9731 | 1          | 0.9731 | 0 | 0 | 0 | 1 Ref      |



|          |            |            |            |        |                     |              |    |        |            |        |   |   |   |            |
|----------|------------|------------|------------|--------|---------------------|--------------|----|--------|------------|--------|---|---|---|------------|
| MW507128 | Unassigned | Unassigned | Unassigned | 532_0  | Clustered           | 75 VC_532_0  | 75 | 0.9393 | 1          | 0.9393 | 0 | 0 | 0 | 1 Ref      |
| MW507129 | Unassigned | Unassigned | Unassigned | 789_0  | Clustered           | 34 VC_789_0  | 34 | 0.9167 | 1          | 0.9167 | 0 | 0 | 0 | 1 Ref      |
| MW507130 | Unassigned | Unassigned | Unassigned | 1216_0 | Clustered           | 22 VC_1216_0 | 22 | 0.4546 | 1          | 0.4546 | 0 | 0 | 0 | 1 Ref      |
| MW507131 | Unassigned | Unassigned | Unassigned | 1207_0 | Clustered           | 20 VC_1207_0 | 20 | 0.9898 | 1          | 0.9898 | 0 | 0 | 0 | 1 Ref      |
| MW507132 | Unassigned | Unassigned | Unassigned | 895_0  | Clustered           | 25 VC_895_0  | 25 | 0.5768 | 1          | 0.5768 | 0 | 0 | 0 | 1 Ref      |
| MW507133 | Unassigned | Unassigned | Unassigned | 895_0  | Clustered           | 25 VC_895_0  | 25 | 0.5768 | 1          | 0.5768 | 0 | 0 | 0 | 1 Ref      |
| MW507134 | Unassigned | Unassigned | Unassigned | 1114_0 | Clustered           | 20 VC_1114_0 | 20 | 0.3238 | 1          | 0.3238 | 0 | 0 | 0 | 0.9842 Ref |
| MW507135 | Unassigned | Unassigned | Unassigned | 952_0  | Clustered           | 39 VC_952_0  | 39 | 0.9064 | 1          | 0.9064 | 0 | 0 | 0 | 1 Ref      |
| MW507136 | Unassigned | Unassigned | Unassigned | 1114_3 | Clustered           | 16 VC_1114_3 | 16 | 0.2336 | 1          | 0.2336 | 0 | 0 | 0 | 0.9667 Ref |
| MW508890 | Unassigned | Unassigned | Unassigned | 440_0  | Clustered           | 33 VC_440_0  | 33 | 0.992  | 1          | 0.992  | 0 | 0 | 0 | 1 Ref      |
| MW512264 | Unassigned | Unassigned | Unassigned | 293_0  | Clustered           | 2 VC_293_0   | 2  | 0.0073 | 0.77582507 | 0.0057 | 0 | 0 | 0 | 1 Ref      |
| MW512571 | Unassigned | Unassigned | Unassigned | 666_0  | Clustered           | 11 VC_666_0  | 11 | 0.5822 | 1          | 0.5822 | 0 | 0 | 0 | 1 Ref      |
| MW512572 | Unassigned | Unassigned | Unassigned | 666_0  | Clustered           | 11 VC_666_0  | 11 | 0.5822 | 1          | 0.5822 | 0 | 0 | 0 | 1 Ref      |
| MW512830 | Unassigned | Unassigned | Unassigned | 80_6   | Clustered           | 11 VC_80_6   | 11 | 0.0527 | 1          | 0.0527 | 0 | 0 | 0 | 0.7455 Ref |
| MW512831 | Unassigned | Unassigned | Unassigned | 486_0  | Clustered           | 47 VC_486_0  | 47 | 0.9022 | 1          | 0.9022 | 0 | 0 | 0 | 1 Ref      |
| MW512832 | Unassigned | Unassigned | Unassigned | 766_0  | Clustered           | 40 VC_766_0  | 40 | 0.7511 | 1          | 0.7511 | 0 | 0 | 0 | 1 Ref      |
| MW512833 | Unassigned | Unassigned | Unassigned | 80_0   | Clustered           | 64 VC_80_0   | 64 | 0.418  | 1          | 0.418  | 0 | 0 | 0 | 0.7649 Ref |
| MW512834 | Unassigned | Unassigned | Unassigned | 80_6   | Clustered           | 11 VC_80_6   | 11 | 0.0527 | 1          | 0.0527 | 0 | 0 | 0 | 0.7455 Ref |
| MW514246 | Unassigned | Unassigned | Unassigned | 312_0  | Clustered           | 12 VC_312_0  | 12 | 0.5719 | 1          | 0.5719 | 0 | 0 | 0 | 0.8485 Ref |
| MW514247 | Unassigned | Unassigned | Unassigned | 312_0  | Clustered           | 12 VC_312_0  | 12 | 0.5719 | 1          | 0.5719 | 0 | 0 | 0 | 0.8485 Ref |
| MW526259 | Unassigned | Unassigned | Unassigned | 77_0   | Clustered           | 37 VC_77_0   | 37 | 0.9392 | 1          | 0.9392 | 0 | 0 | 0 | 1 Ref      |
| MW526260 | Unassigned | Unassigned | Unassigned | 486_0  | Clustered           | 47 VC_486_0  | 47 | 0.9022 | 1          | 0.9022 | 0 | 0 | 0 | 1 Ref      |
| MW528836 | Unassigned | Unassigned | Unassigned | 155_8  | Clustered           | 66 VC_155_8  | 66 | 0.4537 | 1          | 0.4537 | 0 | 0 | 0 | 0.8182 Ref |
| MW534374 | Unassigned | Unassigned | Unassigned | 893_0  | Clustered           | 4 VC_893_0   | 4  | 0.0787 | 0.99998595 | 0.0787 | 0 | 0 | 0 | 1 Ref      |
| MW534375 | Unassigned | Unassigned | Unassigned | 578_3  | Clustered/Singleton | 1 VC_578_3   | 1  | 0      | 1          | 0      | 0 | 0 | 0 | 1 Ref      |
| MW534376 | Unassigned | Unassigned | Unassigned | 989_0  | Clustered           | 13 VC_989_0  | 13 | 0.8622 | 1          | 0.8622 | 0 | 0 | 0 | 1 Ref      |
| MW534377 | Unassigned | Unassigned | Unassigned | 384_1  | Clustered           | 11 VC_384_1  | 11 | 0.0378 | 1          | 0.0378 | 0 | 0 | 0 | 0.8545 Ref |
| MW534378 | Unassigned | Unassigned | Unassigned | 701_0  | Clustered           | 16 VC_701_0  | 16 | 0.2957 | 1          | 0.2957 | 0 | 0 | 0 | 0.9167 Ref |
| MW534379 | Unassigned | Unassigned | Unassigned | 384_16 | Clustered           | 42 VC_384_16 | 42 | 0.134  | 1          | 0.134  | 0 | 0 | 0 | 0.7282 Ref |
| MW534380 | Unassigned | Unassigned | Unassigned | 384_16 | Clustered           | 42 VC_384_16 | 42 | 0.134  | 1          | 0.134  | 0 | 0 | 0 | 0.7282 Ref |
| MW534381 | Unassigned | Unassigned | Unassigned | 384_11 | Clustered           | 31 VC_384_11 | 31 | 0.0926 | 1          | 0.0926 | 0 | 0 | 0 | 0.7011 Ref |
| MW544066 | Unassigned | Unassigned | Unassigned | 802_0  | Clustered           | 8 VC_802_0   | 8  | 0.5141 | 1          | 0.5141 | 0 | 0 | 0 | 1 Ref      |
| MW546064 | Unassigned | Unassigned | Unassigned | 155_8  | Clustered           | 66 VC_155_8  | 66 | 0.4537 | 1          | 0.4537 | 0 | 0 | 0 | 0.8182 Ref |
| MW546065 | Unassigned | Unassigned | Unassigned | 155_8  | Clustered           | 66 VC_155_8  | 66 | 0.4537 | 1          | 0.4537 | 0 | 0 | 0 | 0.8182 Ref |
| MW546066 | Unassigned | Unassigned | Unassigned | 155_8  | Clustered           | 66 VC_155_8  | 66 | 0.4537 | 1          | 0.4537 | 0 | 0 | 0 | 0.8182 Ref |
| MW546067 | Unassigned | Unassigned | Unassigned | 155_8  | Clustered           | 66 VC_155_8  | 66 | 0.4537 | 1          | 0.4537 | 0 | 0 | 0 | 0.8182 Ref |
| MW546068 | Unassigned | Unassigned | Unassigned | 155_8  | Clustered           | 66 VC_155_8  | 66 | 0.4537 | 1          | 0.4537 | 0 | 0 | 0 | 0.8182 Ref |
| MW546069 | Unassigned | Unassigned | Unassigned | 155_8  | Clustered           | 66 VC_155_8  | 66 | 0.4537 | 1          | 0.4537 | 0 | 0 | 0 | 0.8182 Ref |
| MW546070 | Unassigned | Unassigned | Unassigned | 155_8  | Clustered           | 66 VC_155_8  | 66 | 0.4537 | 1          | 0.4537 | 0 | 0 | 0 | 0.8182 Ref |
| MW546071 | Unassigned | Unassigned | Unassigned | 159_0  | Clustered           | 25 VC_159_0  | 25 | 0.7699 | 1          | 0.7699 | 0 | 0 | 0 | 1 Ref      |
| MW546072 | Unassigned | Unassigned | Unassigned | 155_8  | Clustered           | 66 VC_155_8  | 66 | 0.4537 | 1          | 0.4537 | 0 | 0 | 0 | 0.8182 Ref |
| MW546073 | Unassigned | Unassigned | Unassigned | 155_15 | Clustered           | 16 VC_155_15 | 16 | 0.0779 | 1          | 0.0779 | 0 | 0 | 0 | 0.8083 Ref |
| MW546074 | Unassigned | Unassigned | Unassigned | 155_8  | Clustered           | 66 VC_155_8  | 66 | 0.4537 | 1          | 0.4537 | 0 | 0 | 0 | 0.8182 Ref |
| MW546075 | Unassigned | Unassigned | Unassigned | 159_0  | Clustered           | 25 VC_159_0  | 25 | 0.7699 | 1          | 0.7699 | 0 | 0 | 0 | 1 Ref      |
| MW546076 | Unassigned | Unassigned | Unassigned | 159_0  | Clustered           | 25 VC_159_0  | 25 | 0.7699 | 1          | 0.7699 | 0 | 0 | 0 | 1 Ref      |
| MW546077 | Unassigned | Unassigned | Unassigned | 159_0  | Clustered           | 25 VC_159_0  | 25 | 0.7699 | 1          | 0.7699 | 0 | 0 | 0 | 1 Ref      |
| MW554488 | Unassigned | Unassigned | Unassigned | 9_0    | Clustered           | 38 VC_9_0    | 38 | 0.4859 | 1          | 0.4859 | 0 | 0 | 0 | 1 Ref      |
| MW557846 | Unassigned | Unassigned | Unassigned | 81_0   | Clustered           | 41 VC_81_0   | 41 | 0.5815 | 1          | 0.5815 | 0 | 0 | 0 | 0.9805 Ref |
| MW557853 | Unassigned | Unassigned | Unassigned | 313_0  | Clustered           | 2 VC_313_0   | 2  | 1      | 1          | 1      | 0 | 0 | 0 | 1 Ref      |
| MW567727 | Unassigned | Unassigned | Unassigned | 199_22 | Clustered/Singleton | 1 VC_199_22  | 1  | 0      | 1          | 0      | 0 | 0 | 0 | 1 Ref      |
| MW570842 | Unassigned | Unassigned | Unassigned | 993_0  | Clustered           | 3 VC_993_0   | 3  | 0.143  | 0.99848014 | 0.1428 | 0 | 0 | 0 | 1 Ref      |
| MW574966 | Unassigned | Unassigned | Unassigned | 484_0  | Clustered           | 3 VC_484_0   | 3  | 0.5436 | 0.99823901 | 0.5427 | 0 | 0 | 0 | 1 Ref      |
| MW578835 | Unassigned | Unassigned | Unassigned | 917_0  | Clustered           | 28 VC_917_0  | 28 | 0.5465 | 1          | 0.5465 | 0 | 0 | 0 | 1 Ref      |
| MW578836 | Unassigned | Unassigned | Unassigned | 785_2  | Clustered           | 7 VC_785_2   | 7  | 0.2595 | 1          | 0.2595 | 0 | 0 | 0 | 1 Ref      |
| MW578837 | Unassigned | Unassigned | Unassigned | 1415_0 | Clustered           | 31 VC_1415_0 | 31 | 0.8456 | 1          | 0.8456 | 0 | 0 | 0 | 1 Ref      |
| MW582531 | Unassigned | Unassigned | Unassigned | 791_0  | Clustered           | 2 VC_791_0   | 2  | 0.0478 | 0.95514297 | 0.0456 | 0 | 0 | 0 | 1 Ref      |
| MW582634 | Unassigned | Unassigned | Unassigned | 422_0  | Clustered           | 3 VC_422_0   | 3  | 0.1422 | 0.98161408 | 0.1396 | 0 | 0 | 0 | 1 Ref      |
| MW584148 | Unassigned | Unassigned | Unassigned | 575_0  | Clustered           | 13 VC_575_0  | 13 | 0.7491 | 1          | 0.7491 | 0 | 0 | 0 | 1 Ref      |
| MW584149 | Unassigned | Unassigned | Unassigned | 1135_0 | Clustered           | 12 VC_1135_0 | 12 | 0.888  | 1          | 0.888  | 0 | 0 | 0 | 1 Ref      |
| MW584150 | Unassigned | Unassigned | Unassigned | 575_0  | Clustered           | 13 VC_575_0  | 13 | 0.7491 | 1          | 0.7491 | 0 | 0 | 0 | 1 Ref      |
| MW584151 | Unassigned | Unassigned | Unassigned | 1135_0 | Clustered           | 12 VC_1135_0 | 12 | 0.888  | 1          | 0.888  | 0 | 0 | 0 | 1 Ref      |
| MW584152 | Unassigned | Unassigned | Unassigned | 570_0  | Clustered           | 12 VC_570_0  | 12 | 0.8    | 1          | 0.8    | 0 | 0 | 0 | 1 Ref      |
| MW584154 | Unassigned | Unassigned | Unassigned | 575_0  | Clustered           | 13 VC_575_0  | 13 | 0.7491 | 1          | 0.7491 | 0 | 0 | 0 | 1 Ref      |
| MW584155 | Unassigned | Unassigned | Unassigned | 584_0  | Clustered           | 3 VC_584_0   | 3  | 0.3365 | 0.9985034  | 0.336  | 0 | 0 | 0 | 1 Ref      |
| MW584156 | Unassigned | Unassigned | Unassigned | 575_0  | Clustered           | 13 VC_575_0  | 13 | 0.7491 | 1          | 0.7491 | 0 | 0 | 0 | 1 Ref      |
| MW584157 | Unassigned | Unassigned | Unassigned | 1088_0 | Clustered           | 5 VC_1088_0  | 5  | 0.6552 | 0.99999993 | 0.6552 | 0 | 0 | 0 | 1 Ref      |
| MW584158 | Unassigned | Unassigned | Unassigned | 570_0  | Clustered           | 12 VC_570_0  | 12 | 0.8    | 1          | 0.8    | 0 | 0 | 0 | 1 Ref      |
| MW584159 | Unassigned | Unassigned | Unassigned | 534_0  | Clustered           | 3 VC_534_0   | 3  | 0.4527 | 0.99856909 | 0.452  | 0 | 0 | 0 | 1 Ref      |
| MW584160 | Unassigned | Unassigned | Unassigned | 785_0  | Clustered           | 2 VC_785_0   | 2  | 0.0602 | 0.95095213 | 0.0573 | 0 | 0 | 0 | 1 Ref      |
| MW584161 | Unassigned | Unassigned | Unassigned | 570_0  | Clustered           | 12 VC_570_0  | 12 | 0.8    | 1          | 0.8    | 0 | 0 | 0 | 1 Ref      |
| MW584162 | Unassigned | Unassigned | Unassigned | 575_0  | Clustered           | 13 VC_575_0  | 13 | 0.7491 | 1          | 0.7491 | 0 | 0 | 0 | 1 Ref      |
| MW584163 | Unassigned | Unassigned | Unassigned | 575_0  | Clustered           | 13 VC_575_0  | 13 | 0.7491 | 1          | 0.7491 | 0 | 0 | 0 | 1 Ref      |
| MW584164 | Unassigned | Unassigned | Unassigned | 570_0  | Clustered           | 12 VC_570_0  | 12 | 0.8    | 1          | 0.8    | 0 | 0 | 0 | 1 Ref      |
| MW584165 | Unassigned | Unassigned | Unassigned | 247_0  | Clustered           | 4 VC_247_0   | 4  | 0.7726 | 0.99998265 | 0.7725 | 0 | 0 | 0 | 1 Ref      |
| MW584168 | Unassigned | Unassigned | Unassigned | 700_0  | Clustered           | 5 VC_700_0   | 5  | 0.3898 | 0.99999995 | 0.3898 | 0 | 0 | 0 | 1 Ref      |
| MW584169 | Unassigned | Unassigned | Unassigned | 247_0  | Clustered           | 4 VC_247_0   | 4  | 0.7726 | 0.99998265 | 0.7725 | 0 | 0 | 0 | 1 Ref      |
| MW584170 | Unassigned | Unassigned | Unassigned | 993_0  | Clustered           | 3 VC_993_0   | 3  | 0.143  | 0.99848014 | 0.1428 | 0 | 0 | 0 | 1 Ref      |
| MW584171 | Unassigned | Unassigned | Unassigned | 570_0  | Clustered           | 12 VC_570_0  | 12 | 0.8    | 1          | 0.8    | 0 | 0 | 0 | 1 Ref      |
| MW584172 | Unassigned | Unassigned | Unassigned | 700_0  | Clustered           | 5 VC_700_0   | 5  | 0.3898 | 0.99999995 | 0.3898 | 0 | 0 | 0 | 1 Ref      |
| MW584173 | Unassigned | Unassigned | Unassigned | 1088_0 | Clustered           | 5 VC_1088_0  | 5  | 0.6552 | 0.99999993 | 0.6552 | 0 | 0 | 0 | 1 Ref      |
| MW584175 | Unassigned | Unassigned | Unassigned | 584_0  | Clustered           | 3 VC_584_0   | 3  | 0.3365 | 0.9985034  | 0.336  | 0 | 0 | 0 | 1 Ref      |



|          |            |            |            |        |                     |              |    |        |            |        |   |   |   |            |
|----------|------------|------------|------------|--------|---------------------|--------------|----|--------|------------|--------|---|---|---|------------|
| MW584176 | Unassigned | Unassigned | Unassigned | 542_0  | Clustered           | 2 VC_542_0   | 2  | 0.1112 | 0.9549304  | 0.1062 | 0 | 0 | 0 | 1 Ref      |
| MW584178 | Unassigned | Unassigned | Unassigned | 700_0  | Clustered           | 5 VC_700_0   | 5  | 0.3898 | 0.99999995 | 0.3898 | 0 | 0 | 0 | 1 Ref      |
| MW584179 | Unassigned | Unassigned | Unassigned | 570_0  | Clustered           | 12 VC_570_0  | 12 | 0.8    | 1          | 0.8    | 0 | 0 | 0 | 1 Ref      |
| MW584180 | Unassigned | Unassigned | Unassigned | 570_0  | Clustered           | 12 VC_570_0  | 12 | 0.8    | 1          | 0.8    | 0 | 0 | 0 | 1 Ref      |
| MW584181 | Unassigned | Unassigned | Unassigned | 575_0  | Clustered           | 13 VC_575_0  | 13 | 0.7491 | 1          | 0.7491 | 0 | 0 | 0 | 1 Ref      |
| MW584182 | Unassigned | Unassigned | Unassigned | 575_0  | Clustered           | 13 VC_575_0  | 13 | 0.7491 | 1          | 0.7491 | 0 | 0 | 0 | 1 Ref      |
| MW584184 | Unassigned | Unassigned | Unassigned | 1135_0 | Clustered           | 12 VC_1135_0 | 12 | 0.888  | 1          | 0.888  | 0 | 0 | 0 | 1 Ref      |
| MW584188 | Unassigned | Unassigned | Unassigned | 542_1  | Clustered/Singleton | 1 VC_542_1   | 1  | 0      | 1          | 0      | 0 | 0 | 0 | 1 Ref      |
| MW584189 | Unassigned | Unassigned | Unassigned | 1088_0 | Clustered           | 5 VC_1088_0  | 5  | 0.6552 | 0.99999993 | 0.6552 | 0 | 0 | 0 | 1 Ref      |
| MW584190 | Unassigned | Unassigned | Unassigned | 700_0  | Clustered           | 5 VC_700_0   | 5  | 0.3898 | 0.99999995 | 0.3898 | 0 | 0 | 0 | 1 Ref      |
| MW584191 | Unassigned | Unassigned | Unassigned | 993_0  | Clustered           | 3 VC_993_0   | 3  | 0.143  | 0.99848014 | 0.1428 | 0 | 0 | 0 | 1 Ref      |
| MW584192 | Unassigned | Unassigned | Unassigned | 575_0  | Clustered           | 13 VC_575_0  | 13 | 0.7491 | 1          | 0.7491 | 0 | 0 | 0 | 1 Ref      |
| MW584193 | Unassigned | Unassigned | Unassigned | 1135_0 | Clustered           | 12 VC_1135_0 | 12 | 0.888  | 1          | 0.888  | 0 | 0 | 0 | 1 Ref      |
| MW584194 | Unassigned | Unassigned | Unassigned | 1135_0 | Clustered           | 12 VC_1135_0 | 12 | 0.888  | 1          | 0.888  | 0 | 0 | 0 | 1 Ref      |
| MW584196 | Unassigned | Unassigned | Unassigned | 570_0  | Clustered           | 12 VC_570_0  | 12 | 0.8    | 1          | 0.8    | 0 | 0 | 0 | 1 Ref      |
| MW584197 | Unassigned | Unassigned | Unassigned | 534_0  | Clustered           | 3 VC_534_0   | 3  | 0.4527 | 0.99856909 | 0.452  | 0 | 0 | 0 | 1 Ref      |
| MW584198 | Unassigned | Unassigned | Unassigned | 1135_0 | Clustered           | 12 VC_1135_0 | 12 | 0.888  | 1          | 0.888  | 0 | 0 | 0 | 1 Ref      |
| MW584199 | Unassigned | Unassigned | Unassigned | 542_0  | Clustered           | 2 VC_542_0   | 2  | 0.1112 | 0.9549304  | 0.1062 | 0 | 0 | 0 | 1 Ref      |
| MW584200 | Unassigned | Unassigned | Unassigned | 1135_0 | Clustered           | 12 VC_1135_0 | 12 | 0.888  | 1          | 0.888  | 0 | 0 | 0 | 1 Ref      |
| MW584201 | Unassigned | Unassigned | Unassigned | 584_0  | Clustered           | 3 VC_584_0   | 3  | 0.3365 | 0.9985034  | 0.336  | 0 | 0 | 0 | 1 Ref      |
| MW584202 | Unassigned | Unassigned | Unassigned | 785_0  | Clustered           | 2 VC_785_0   | 2  | 0.0602 | 0.95095213 | 0.0573 | 0 | 0 | 0 | 1 Ref      |
| MW584203 | Unassigned | Unassigned | Unassigned | 575_0  | Clustered           | 13 VC_575_0  | 13 | 0.7491 | 1          | 0.7491 | 0 | 0 | 0 | 1 Ref      |
| MW584204 | Unassigned | Unassigned | Unassigned | 570_0  | Clustered           | 12 VC_570_0  | 12 | 0.8    | 1          | 0.8    | 0 | 0 | 0 | 1 Ref      |
| MW584205 | Unassigned | Unassigned | Unassigned | 1135_0 | Clustered           | 12 VC_1135_0 | 12 | 0.888  | 1          | 0.888  | 0 | 0 | 0 | 1 Ref      |
| MW584206 | Unassigned | Unassigned | Unassigned | 1088_0 | Clustered           | 5 VC_1088_0  | 5  | 0.6552 | 0.99999993 | 0.6552 | 0 | 0 | 0 | 1 Ref      |
| MW584207 | Unassigned | Unassigned | Unassigned | 247_0  | Clustered           | 4 VC_247_0   | 4  | 0.7726 | 0.99998265 | 0.7725 | 0 | 0 | 0 | 1 Ref      |
| MW584208 | Unassigned | Unassigned | Unassigned | 575_0  | Clustered           | 13 VC_575_0  | 13 | 0.7491 | 1          | 0.7491 | 0 | 0 | 0 | 1 Ref      |
| MW584209 | Unassigned | Unassigned | Unassigned | 1088_0 | Clustered           | 5 VC_1088_0  | 5  | 0.6552 | 0.99999993 | 0.6552 | 0 | 0 | 0 | 1 Ref      |
| MW584210 | Unassigned | Unassigned | Unassigned | 1135_0 | Clustered           | 12 VC_1135_0 | 12 | 0.888  | 1          | 0.888  | 0 | 0 | 0 | 1 Ref      |
| MW584212 | Unassigned | Unassigned | Unassigned | 575_0  | Clustered           | 13 VC_575_0  | 13 | 0.7491 | 1          | 0.7491 | 0 | 0 | 0 | 1 Ref      |
| MW584228 | Unassigned | Unassigned | Unassigned | 913_1  | Clustered           | 8 VC_913_1   | 8  | 0.1102 | 0.9989323  | 0.11   | 0 | 0 | 0 | 0.75 Ref   |
| MW584871 | Unassigned | Unassigned | Unassigned | 619_2  | Clustered           | 10 VC_619_2  | 10 | 0.3034 | 1          | 0.3034 | 0 | 0 | 0 | 1 Ref      |
| MW590223 | Unassigned | Unassigned | Unassigned | 1209_0 | Clustered           | 2 VC_1209_0  | 2  | 0.0989 | 0.93550199 | 0.0925 | 0 | 0 | 0 | 1 Ref      |
| MW590329 | Unassigned | Unassigned | Unassigned | 113_0  | Clustered           | 91 VC_113_0  | 91 | 0.9584 | 1          | 0.9584 | 0 | 0 | 0 | 1 Ref      |
| MW590698 | Unassigned | Unassigned | Unassigned | 628_0  | Clustered           | 5 VC_628_0   | 5  | 0.4297 | 0.99999996 | 0.4297 | 0 | 0 | 0 | 1 Ref      |
| MW595220 | Unassigned | Unassigned | Unassigned | 80_5   | Clustered           | 2 VC_80_5    | 2  | 0.0046 | 0.92781966 | 0.0043 | 0 | 0 | 0 | 1 Ref      |
| MW595221 | Unassigned | Unassigned | Unassigned | 80_0   | Clustered           | 64 VC_80_0   | 64 | 0.418  | 1          | 0.418  | 0 | 1 | 0 | 0.7649 Ref |
| MW596414 | Unassigned | Unassigned | Unassigned | 913_1  | Clustered           | 8 VC_913_1   | 8  | 0.1102 | 0.9989323  | 0.11   | 0 | 0 | 0 | 0.75 Ref   |
| MW598258 | Unassigned | Unassigned | Unassigned | 603_0  | Clustered           | 28 VC_603_0  | 28 | 0.7692 | 1          | 0.7692 | 0 | 0 | 0 | 1 Ref      |
| MW598459 | Unassigned | Unassigned | Unassigned | 297_0  | Clustered           | 10 VC_297_0  | 10 | 0.0971 | 1          | 0.0971 | 0 | 0 | 0 | 1 Ref      |
| MW600722 | Unassigned | Unassigned | Unassigned | 398_0  | Clustered           | 51 VC_398_0  | 51 | 0.8741 | 1          | 0.8741 | 0 | 0 | 0 | 1 Ref      |
| MW601216 | Unassigned | Unassigned | Unassigned | 223_5  | Clustered           | 2 VC_223_5   | 2  | 0.0094 | 0.95747812 | 0.009  | 0 | 0 | 0 | 1 Ref      |
| MW601217 | Unassigned | Unassigned | Unassigned | 1415_0 | Clustered           | 31 VC_1415_0 | 31 | 0.8456 | 1          | 0.8456 | 0 | 0 | 0 | 1 Ref      |
| MW601218 | Unassigned | Unassigned | Unassigned | 241_0  | Clustered           | 21 VC_241_0  | 21 | 0.8342 | 1          | 0.8342 | 0 | 0 | 0 | 1 Ref      |
| MW601219 | Unassigned | Unassigned | Unassigned | 701_0  | Clustered           | 16 VC_701_0  | 16 | 0.2957 | 1          | 0.2957 | 0 | 0 | 0 | 0.9167 Ref |
| MW601220 | Unassigned | Unassigned | Unassigned | 1225_0 | Clustered           | 6 VC_1225_0  | 6  | 0.9947 | 0.99996974 | 0.9947 | 0 | 0 | 0 | 1 Ref      |
| MW601221 | Unassigned | Unassigned | Unassigned | 1287_0 | Clustered           | 44 VC_1287_0 | 44 | 1      | 1          | 1      | 0 | 0 | 0 | 1 Ref      |
| MW601222 | Unassigned | Unassigned | Unassigned | 244_1  | Clustered           | 13 VC_244_1  | 13 | 0.1766 | 1          | 0.1766 | 0 | 0 | 0 | 0.7308 Ref |
| MW601223 | Unassigned | Unassigned | Unassigned | 1118_0 | Clustered           | 4 VC_1118_0  | 4  | 0.1491 | 0.99998427 | 0.1491 | 0 | 0 | 0 | 1 Ref      |
| MW601224 | Unassigned | Unassigned | Unassigned | 1287_0 | Clustered           | 44 VC_1287_0 | 44 | 1      | 1          | 1      | 0 | 0 | 0 | 1 Ref      |
| MW601225 | Unassigned | Unassigned | Unassigned | 1217_0 | Clustered           | 41 VC_1217_0 | 41 | 0.9546 | 1          | 0.9546 | 0 | 0 | 0 | 0.9976 Ref |
| MW602648 | Unassigned | Unassigned | Unassigned | 440_0  | Clustered           | 33 VC_440_0  | 33 | 0.992  | 1          | 0.992  | 0 | 0 | 0 | 1 Ref      |
| MW623430 | Unassigned | Unassigned | Unassigned | 1003_0 | Clustered           | 16 VC_1003_0 | 16 | 0.8967 | 1          | 0.8967 | 0 | 0 | 0 | 1 Ref      |
| MW627293 | Unassigned | Unassigned | Unassigned | 7_0    | Clustered           | 28 VC_7_0    | 28 | 0.389  | 1          | 0.389  | 0 | 0 | 0 | 0.9947 Ref |
| MW627366 | Unassigned | Unassigned | Unassigned | 161_0  | Clustered           | 14 VC_161_0  | 14 | 0.6064 | 1          | 0.6064 | 0 | 0 | 0 | 1 Ref      |
| MW629017 | Unassigned | Unassigned | Unassigned | 687_0  | Clustered           | 21 VC_687_0  | 21 | 0.3608 | 1          | 0.3608 | 0 | 0 | 0 | 1 Ref      |
| MW630115 | Unassigned | Unassigned | Unassigned | 801_0  | Clustered           | 37 VC_801_0  | 37 | 0.5672 | 1          | 0.5672 | 0 | 0 | 0 | 1 Ref      |
| MW630116 | Unassigned | Unassigned | Unassigned | 293_13 | Clustered           | 10 VC_293_13 | 10 | 0.0698 | 0.99999931 | 0.0698 | 0 | 0 | 0 | 0.9556 Ref |
| MW633168 | Unassigned | Unassigned | Unassigned | 93_0   | Clustered           | 22 VC_93_0   | 22 | 0.5285 | 1          | 0.5285 | 0 | 0 | 0 | 1 Ref      |
| MW650841 | Unassigned | Unassigned | Unassigned | 7_0    | Clustered           | 28 VC_7_0    | 28 | 0.389  | 1          | 0.389  | 0 | 0 | 0 | 0.9947 Ref |
| MW650886 | Unassigned | Unassigned | Unassigned | 133_1  | Clustered           | 6 VC_133_1   | 6  | 0.0566 | 0.99999999 | 0.0566 | 0 | 0 | 0 | 1 Ref      |
| MW651859 | Unassigned | Unassigned | Unassigned | 367_0  | Clustered           | 2 VC_367_0   | 2  | 0.0508 | 0.93418388 | 0.0474 | 0 | 0 | 0 | 1 Ref      |
| MW654182 | Unassigned | Unassigned | Unassigned | 987_0  | Clustered           | 2 VC_987_0   | 2  | 0.9225 | 0.90744399 | 0.8372 | 0 | 0 | 0 | 1 Ref      |
| MW655991 | Unassigned | Unassigned | Unassigned | 972_0  | Clustered           | 99 VC_972_0  | 99 | 0.9113 | 1          | 0.9113 | 0 | 0 | 0 | 0.9928 Ref |
| MW660583 | Unassigned | Unassigned | Unassigned | 1526_0 | Clustered           | 3 VC_1526_0  | 3  | 0.6842 | 0.9969176  | 0.6821 | 0 | 0 | 0 | 1 Ref      |
| MW672037 | Unassigned | Unassigned | Unassigned | 972_0  | Clustered           | 99 VC_972_0  | 99 | 0.9113 | 1          | 0.9113 | 0 | 0 | 0 | 0.9928 Ref |
| MW672041 | Unassigned | Unassigned | Unassigned | 710_0  | Clustered/Singleton | 1 VC_710_0   | 1  | 0      | 1          | 0      | 0 | 0 | 0 | 1 Ref      |
| MW677132 | Unassigned | Unassigned | Unassigned | 110_0  | Clustered           | 33 VC_110_0  | 33 | 0.9488 | 1          | 0.9488 | 0 | 0 | 0 | 1 Ref      |
| MW677509 | Unassigned | Unassigned | Unassigned | 914_0  | Clustered           | 11 VC_914_0  | 11 | 0.9693 | 1          | 0.9693 | 0 | 0 | 0 | 1 Ref      |
| MW677510 | Unassigned | Unassigned | Unassigned | 914_0  | Clustered           | 11 VC_914_0  | 11 | 0.9693 | 1          | 0.9693 | 0 | 0 | 0 | 1 Ref      |
| MW677511 | Unassigned | Unassigned | Unassigned | 1069_0 | Clustered           | 4 VC_1069_0  | 4  | 0.8959 | 0.99995869 | 0.8959 | 0 | 0 | 0 | 1 Ref      |
| MW677512 | Unassigned | Unassigned | Unassigned | 914_0  | Clustered           | 11 VC_914_0  | 11 | 0.9693 | 1          | 0.9693 | 0 | 0 | 0 | 1 Ref      |
| MW677513 | Unassigned | Unassigned | Unassigned | 956_0  | Clustered           | 23 VC_956_0  | 23 | 0.944  | 1          | 0.944  | 0 | 0 | 0 | 1 Ref      |
| MW677514 | Unassigned | Unassigned | Unassigned | 766_0  | Clustered           | 40 VC_766_0  | 40 | 0.7511 | 1          | 0.7511 | 0 | 0 | 0 | 1 Ref      |
| MW677515 | Unassigned | Unassigned | Unassigned | 914_0  | Clustered           | 11 VC_914_0  | 11 | 0.9693 | 1          | 0.9693 | 0 | 0 | 0 | 1 Ref      |
| MW677516 | Unassigned | Unassigned | Unassigned | 956_0  | Clustered           | 23 VC_956_0  | 23 | 0.944  | 1          | 0.944  | 0 | 0 | 0 | 1 Ref      |
| MW677517 | Unassigned | Unassigned | Unassigned | 914_0  | Clustered           | 11 VC_914_0  | 11 | 0.9693 | 1          | 0.9693 | 0 | 0 | 0 | 1 Ref      |
| MW677518 | Unassigned | Unassigned | Unassigned | 956_0  | Clustered           | 23 VC_956_0  | 23 | 0.944  | 1          | 0.944  | 0 | 0 | 0 | 1 Ref      |
| MW677519 | Unassigned | Unassigned | Unassigned | 956_0  | Clustered           | 23 VC_956_0  | 23 | 0.944  | 1          | 0.944  | 0 | 0 | 0 | 1 Ref      |
| MW677520 | Unassigned | Unassigned | Unassigned | 914_0  | Clustered           | 11 VC_914_0  | 11 | 0.9693 | 1          | 0.9693 | 0 | 0 | 0 | 1 Ref      |
| MW677521 | Unassigned | Unassigned | Unassigned | 956_0  | Clustered           | 23 VC_956_0  | 23 | 0.944  | 1          | 0.944  | 0 | 0 | 0 | 1 Ref      |



|          |            |            |            |         |                     |              |     |        |            |        |   |   |   |            |
|----------|------------|------------|------------|---------|---------------------|--------------|-----|--------|------------|--------|---|---|---|------------|
| MW677522 | Unassigned | Unassigned | Unassigned | 956_0   | Clustered           | 23 VC_956_0  | 23  | 0.944  | 1          | 0.944  | 0 | 0 | 0 | 1 Ref      |
| MW677523 | Unassigned | Unassigned | Unassigned | 956_0   | Clustered           | 23 VC_956_0  | 23  | 0.944  | 1          | 0.944  | 0 | 0 | 0 | 1 Ref      |
| MW677524 | Unassigned | Unassigned | Unassigned | 956_0   | Clustered           | 23 VC_956_0  | 23  | 0.944  | 1          | 0.944  | 0 | 0 | 0 | 1 Ref      |
| MW677525 | Unassigned | Unassigned | Unassigned | 485_0   | Clustered           | 2 VC_485_0   | 2   | 0.0796 | 0.95665719 | 0.0762 | 0 | 0 | 0 | 1 Ref      |
| MW677526 | Unassigned | Unassigned | Unassigned | 766_0   | Clustered           | 40 VC_766_0  | 40  | 0.7511 | 1          | 0.7511 | 0 | 0 | 0 | 1 Ref      |
| MW677527 | Unassigned | Unassigned | Unassigned | 1069_0  | Clustered           | 4 VC_1069_0  | 4   | 0.8959 | 0.99995869 | 0.8959 | 0 | 0 | 0 | 1 Ref      |
| MW677528 | Unassigned | Unassigned | Unassigned | 621_0   | Clustered           | 2 VC_621_0   | 2   | 0.2279 | 0.95560476 | 0.2178 | 0 | 0 | 0 | 1 Ref      |
| MW677529 | Unassigned | Unassigned | Unassigned | 915_1   | Clustered/Singleton | 1 VC_915_1   | 1   | 0      | 1          | 0      | 0 | 0 | 0 | 1 Ref      |
| MW679410 | Unassigned | Unassigned | Unassigned | 297_5   | Clustered           | 14 VC_297_5  | 14  | 0.141  | 1          | 0.141  | 0 | 0 | 0 | 0.9231 Ref |
| MW689258 | Unassigned | Unassigned | Unassigned | 604_2   | Clustered/Singleton | 1 VC_604_2   | 1   | 0      | 1          | 0      | 0 | 0 | 0 | 1 Ref      |
| MW712717 | Unassigned | Unassigned | Unassigned | 543_0   | Clustered           | 25 VC_543_0  | 25  | 0.4584 | 1          | 0.4584 | 0 | 0 | 0 | 1 Ref      |
| MW712718 | Unassigned | Unassigned | Unassigned | 531_0   | Clustered           | 32 VC_531_0  | 32  | 0.6859 | 1          | 0.6859 | 0 | 0 | 0 | 1 Ref      |
| MW712719 | Unassigned | Unassigned | Unassigned | 1075_0  | Clustered           | 11 VC_1075_0 | 11  | 0.6562 | 1          | 0.6562 | 0 | 0 | 0 | 0.9273 Ref |
| MW712720 | Unassigned | Unassigned | Unassigned | 384_11  | Clustered           | 31 VC_384_11 | 31  | 0.0926 | 1          | 0.0926 | 0 | 0 | 0 | 0.7011 Ref |
| MW712721 | Unassigned | Unassigned | Unassigned | 1287_0  | Clustered           | 44 VC_1287_0 | 44  | 1      | 1          | 1      | 0 | 0 | 0 | 1 Ref      |
| MW712722 | Unassigned | Unassigned | Unassigned | 243_0   | Clustered           | 72 VC_243_0  | 72  | 0.8089 | 1          | 0.8089 | 0 | 0 | 0 | 1 Ref      |
| MW712723 | Unassigned | Unassigned | Unassigned | 243_0   | Clustered           | 72 VC_243_0  | 72  | 0.8089 | 1          | 0.8089 | 0 | 0 | 0 | 1 Ref      |
| MW712724 | Unassigned | Unassigned | Unassigned | 1212_0  | Clustered           | 21 VC_1212_0 | 21  | 0.711  | 1          | 0.711  | 0 | 0 | 0 | 1 Ref      |
| MW712726 | Unassigned | Unassigned | Unassigned | 384_15  | Clustered           | 44 VC_384_15 | 44  | 0.139  | 1          | 0.139  | 0 | 0 | 0 | 0.7474 Ref |
| MW712727 | Unassigned | Unassigned | Unassigned | 1212_0  | Clustered           | 21 VC_1212_0 | 21  | 0.711  | 1          | 0.711  | 0 | 0 | 0 | 1 Ref      |
| MW712728 | Unassigned | Unassigned | Unassigned | 1212_0  | Clustered           | 21 VC_1212_0 | 21  | 0.711  | 1          | 0.711  | 0 | 0 | 0 | 1 Ref      |
| MW712729 | Unassigned | Unassigned | Unassigned | 579_27  | Clustered           | 2 VC_579_27  | 2   | 0.0032 | 0.63743142 | 0.002  | 0 | 0 | 0 | 1 Ref      |
| MW712730 | Unassigned | Unassigned | Unassigned | 243_0   | Clustered           | 72 VC_243_0  | 72  | 0.8089 | 1          | 0.8089 | 0 | 0 | 0 | 1 Ref      |
| MW712731 | Unassigned | Unassigned | Unassigned | 526_0   | Clustered           | 32 VC_526_0  | 32  | 0.9037 | 1          | 0.9037 | 0 | 0 | 0 | 1 Ref      |
| MW712732 | Unassigned | Unassigned | Unassigned | 335_23  | Clustered           | 17 VC_335_23 | 17  | 0.0714 | 1          | 0.0714 | 0 | 0 | 0 | 0.6397 Ref |
| MW712733 | Unassigned | Unassigned | Unassigned | 243_0   | Clustered           | 72 VC_243_0  | 72  | 0.8089 | 1          | 0.8089 | 0 | 0 | 0 | 1 Ref      |
| MW712734 | Unassigned | Unassigned | Unassigned | 243_0   | Clustered           | 72 VC_243_0  | 72  | 0.8089 | 1          | 0.8089 | 0 | 0 | 0 | 1 Ref      |
| MW712735 | Unassigned | Unassigned | Unassigned | 1211_1  | Clustered           | 3 VC_1211_1  | 3   | 0.3052 | 0.99836447 | 0.3047 | 0 | 0 | 0 | 1 Ref      |
| MW712736 | Unassigned | Unassigned | Unassigned | 901_0   | Clustered           | 31 VC_901_0  | 31  | 0.8235 | 1          | 0.8235 | 0 | 0 | 0 | 0.8194 Ref |
| MW712737 | Unassigned | Unassigned | Unassigned | 577_0   | Clustered           | 21 VC_577_0  | 21  | 0.9908 | 1          | 0.9908 | 0 | 0 | 0 | 1 Ref      |
| MW713383 | Unassigned | Unassigned | Unassigned | 785_1   | Clustered           | 9 VC_785_1   | 9   | 0.3679 | 1          | 0.3679 | 0 | 0 | 0 | 1 Ref      |
| MW713578 | Unassigned | Unassigned | Unassigned | 200_0   | Clustered           | 15 VC_200_0  | 15  | 0.5004 | 1          | 0.5004 | 0 | 0 | 0 | 1 Ref      |
| MW715619 | Unassigned | Unassigned | Unassigned | 654_0   | Clustered           | 115 VC_654_0 | 115 | 0.7303 | 1          | 0.7303 | 0 | 0 | 0 | 0.8764 Ref |
| MW722080 | Unassigned | Unassigned | Unassigned | 372_0   | Clustered           | 7 VC_372_0   | 7   | 0.3691 | 1          | 0.3691 | 0 | 0 | 0 | 1 Ref      |
| MW722081 | Unassigned | Unassigned | Unassigned | 971_0   | Clustered           | 40 VC_971_0  | 40  | 0.6793 | 1          | 0.6793 | 0 | 0 | 0 | 0.9359 Ref |
| MW722082 | Unassigned | Unassigned | Unassigned | 474_0   | Clustered           | 19 VC_474_0  | 19  | 0.3729 | 1          | 0.3729 | 0 | 0 | 0 | 1 Ref      |
| MW722083 | Unassigned | Unassigned | Unassigned | 492_0   | Clustered           | 20 VC_492_0  | 20  | 0.7887 | 1          | 0.7887 | 0 | 0 | 0 | 1 Ref      |
| MW722521 | Unassigned | Unassigned | Unassigned | 30_0    | Clustered           | 2 VC_30_0    | 2   | 0.0306 | 0.95720965 | 0.0293 | 0 | 0 | 0 | 1 Ref      |
| MW722821 | Unassigned | Unassigned | Unassigned | 655_0   | Clustered           | 45 VC_655_0  | 45  | 0.7722 | 1          | 0.7722 | 0 | 0 | 0 | 1 Ref      |
| MW725301 | Unassigned | Unassigned | Unassigned | 560_0   | Clustered           | 15 VC_560_0  | 15  | 0.2846 | 1          | 0.2846 | 0 | 0 | 0 | 1 Ref      |
| MW741821 | Unassigned | Unassigned | Unassigned | 837_1   | Clustered           | 24 VC_837_1  | 24  | 0.5328 | 1          | 0.5328 | 0 | 0 | 0 | 1 Ref      |
| MW748991 | Unassigned | Unassigned | Unassigned | 465_0   | Clustered           | 80 VC_465_0  | 80  | 0.9988 | 1          | 0.9988 | 0 | 0 | 0 | 1 Ref      |
| MW748992 | Unassigned | Unassigned | Unassigned | 548_0   | Clustered           | 9 VC_548_0   | 9   | 0.8018 | 1          | 0.8018 | 0 | 0 | 0 | 1 Ref      |
| MW748993 | Unassigned | Unassigned | Unassigned | 304_0   | Clustered           | 5 VC_304_0   | 5   | 0.1053 | 0.99999993 | 0.1053 | 0 | 0 | 0 | 0.9 Ref    |
| MW748998 | Unassigned | Unassigned | Unassigned | 794_17  | Clustered           | 2 VC_794_17  | 2   | 0.0059 | 0.57025912 | 0.0034 | 0 | 0 | 0 | 1 Ref      |
| MW748999 | Unassigned | Unassigned | Unassigned | 609_0   | Clustered           | 27 VC_609_0  | 27  | 0.9943 | 1          | 0.9943 | 0 | 0 | 0 | 1 Ref      |
| MW749000 | Unassigned | Unassigned | Unassigned | 290_153 | Clustered/Singleton | 1 VC_290_153 | 1   | 0      | 1          | 0      | 0 | 0 | 0 | 1 Ref      |
| MW749001 | Unassigned | Unassigned | Unassigned | 290_68  | Clustered/Singleton | 1 VC_290_68  | 1   | 0      | 1          | 0      | 0 | 0 | 0 | 1 Ref      |
| MW749002 | Unassigned | Unassigned | Unassigned | 87_2    | Clustered           | 3 VC_87_2    | 3   | 0.033  | 0.99732979 | 0.0329 | 0 | 0 | 0 | 1 Ref      |
| MW749003 | Unassigned | Unassigned | Unassigned | 462_0   | Clustered           | 4 VC_462_0   | 4   | 0.3031 | 0.99978853 | 0.303  | 0 | 0 | 0 | 1 Ref      |
| MW749004 | Unassigned | Unassigned | Unassigned | 343_0   | Clustered           | 3 VC_343_0   | 3   | 0.0404 | 0.99858753 | 0.0404 | 0 | 0 | 0 | 1 Ref      |
| MW749005 | Unassigned | Unassigned | Unassigned | 859_0   | Clustered           | 67 VC_859_0  | 67  | 0.9622 | 1          | 0.9622 | 0 | 0 | 0 | 1 Ref      |
| MW749007 | Unassigned | Unassigned | Unassigned | 87_2    | Clustered           | 3 VC_87_2    | 3   | 0.033  | 0.99732979 | 0.0329 | 0 | 0 | 0 | 1 Ref      |
| MW749010 | Unassigned | Unassigned | Unassigned | 343_0   | Clustered           | 3 VC_343_0   | 3   | 0.0404 | 0.99858753 | 0.0404 | 0 | 0 | 0 | 1 Ref      |
| MW760841 | Unassigned | Unassigned | Unassigned | 994_2   | Clustered           | 5 VC_994_2   | 5   | 0.0483 | 0.88370509 | 0.0427 | 0 | 0 | 0 | 1 Ref      |
| MW767161 | Unassigned | Unassigned | Unassigned | 687_0   | Clustered           | 21 VC_687_0  | 21  | 0.3608 | 1          | 0.3608 | 0 | 0 | 0 | 1 Ref      |
| MW767996 | Unassigned | Unassigned | Unassigned | 399_0   | Clustered           | 49 VC_399_0  | 49  | 0.7927 | 1          | 0.7927 | 0 | 0 | 0 | 1 Ref      |
| MW787012 | Unassigned | Unassigned | Unassigned | 912_5   | Clustered/Singleton | 1 VC_912_5   | 1   | 0      | 1          | 0      | 0 | 0 | 0 | 1 Ref      |
| MW790495 | Unassigned | Unassigned | Unassigned | 654_0   | Clustered           | 115 VC_654_0 | 115 | 0.7303 | 1          | 0.7303 | 0 | 0 | 0 | 0.8764 Ref |
| MW790496 | Unassigned | Unassigned | Unassigned | 30_0    | Clustered           | 2 VC_30_0    | 2   | 0.0306 | 0.95720965 | 0.0293 | 0 | 0 | 0 | 1 Ref      |
| MW791312 | Unassigned | Unassigned | Unassigned | 705_0   | Clustered           | 2 VC_705_0   | 2   | 0.4153 | 0.95606213 | 0.3971 | 0 | 0 | 0 | 1 Ref      |
| MW794140 | Unassigned | Unassigned | Unassigned | 513_1   | Clustered           | 41 VC_513_1  | 41  | 0.3276 | 1          | 0.3276 | 0 | 0 | 0 | 0.911 Ref  |
| MW794141 | Unassigned | Unassigned | Unassigned | 513_1   | Clustered           | 41 VC_513_1  | 41  | 0.3276 | 1          | 0.3276 | 0 | 0 | 0 | 0.911 Ref  |
| MW794142 | Unassigned | Unassigned | Unassigned | 513_1   | Clustered           | 41 VC_513_1  | 41  | 0.3276 | 1          | 0.3276 | 0 | 0 | 0 | 0.911 Ref  |
| MW794143 | Unassigned | Unassigned | Unassigned | 513_1   | Clustered           | 41 VC_513_1  | 41  | 0.3276 | 1          | 0.3276 | 0 | 0 | 0 | 0.911 Ref  |
| MW794144 | Unassigned | Unassigned | Unassigned | 513_1   | Clustered           | 41 VC_513_1  | 41  | 0.3276 | 1          | 0.3276 | 0 | 0 | 0 | 0.911 Ref  |
| MW794145 | Unassigned | Unassigned | Unassigned | 513_1   | Clustered           | 41 VC_513_1  | 41  | 0.3276 | 1          | 0.3276 | 0 | 0 | 0 | 0.911 Ref  |
| MW794146 | Unassigned | Unassigned | Unassigned | 513_1   | Clustered           | 41 VC_513_1  | 41  | 0.3276 | 1          | 0.3276 | 0 | 0 | 0 | 0.911 Ref  |
| MW794147 | Unassigned | Unassigned | Unassigned | 513_1   | Clustered           | 41 VC_513_1  | 41  | 0.3276 | 1          | 0.3276 | 0 | 0 | 0 | 0.911 Ref  |
| MW794148 | Unassigned | Unassigned | Unassigned | 513_1   | Clustered           | 41 VC_513_1  | 41  | 0.3276 | 1          | 0.3276 | 0 | 0 | 0 | 0.911 Ref  |
| MW794149 | Unassigned | Unassigned | Unassigned | 513_1   | Clustered           | 41 VC_513_1  | 41  | 0.3276 | 1          | 0.3276 | 0 | 0 | 0 | 0.911 Ref  |
| MW794150 | Unassigned | Unassigned | Unassigned | 513_0   | Clustered           | 39 VC_513_0  | 39  | 0.3078 | 1          | 0.3078 | 0 | 0 | 0 | 1 Ref      |
| MW794151 | Unassigned | Unassigned | Unassigned | 513_0   | Clustered           | 39 VC_513_0  | 39  | 0.3078 | 1          | 0.3078 | 0 | 0 | 0 | 1 Ref      |
| MW794152 | Unassigned | Unassigned | Unassigned | 513_0   | Clustered           | 39 VC_513_0  | 39  | 0.3078 | 1          | 0.3078 | 0 | 0 | 0 | 1 Ref      |
| MW794153 | Unassigned | Unassigned | Unassigned | 513_0   | Clustered           | 39 VC_513_0  | 39  | 0.3078 | 1          | 0.3078 | 0 | 0 | 0 | 1 Ref      |
| MW794154 | Unassigned | Unassigned | Unassigned | 513_0   | Clustered           | 39 VC_513_0  | 39  | 0.3078 | 1          | 0.3078 | 0 | 0 | 0 | 1 Ref      |
| MW794155 | Unassigned | Unassigned | Unassigned | 513_0   | Clustered           | 39 VC_513_0  | 39  | 0.3078 | 1          | 0.3078 | 0 | 0 | 0 | 1 Ref      |
| MW794156 | Unassigned | Unassigned | Unassigned | 513_0   | Clustered           | 39 VC_513_0  | 39  | 0.3078 | 1          | 0.3078 | 0 | 0 | 0 | 1 Ref      |
| MW794157 | Unassigned | Unassigned | Unassigned | 513_0   | Clustered           | 39 VC_513_0  | 39  | 0.3078 | 1          | 0.3078 | 0 | 0 | 0 | 1 Ref      |
| MW794158 | Unassigned | Unassigned | Unassigned | 513_0   | Clustered           | 39 VC_513_0  | 39  | 0.3078 | 1          | 0.3078 | 0 | 0 | 0 | 1 Ref      |
| MW794159 | Unassigned | Unassigned | Unassigned | 513_0   | Clustered           | 39 VC_513_0  | 39  | 0.3078 | 1          | 0.3078 | 0 | 0 | 0 | 1 Ref      |



|          |            |            |            |         |                     |              |    |        |            |        |   |   |   |            |
|----------|------------|------------|------------|---------|---------------------|--------------|----|--------|------------|--------|---|---|---|------------|
| MW794160 | Unassigned | Unassigned | Unassigned | 513_0   | Clustered           | 39 VC_513_0  | 39 | 0.3078 | 1          | 0.3078 | 0 | 0 | 0 | 1 Ref      |
| MW794161 | Unassigned | Unassigned | Unassigned | 513_0   | Clustered           | 39 VC_513_0  | 39 | 0.3078 | 1          | 0.3078 | 0 | 0 | 0 | 1 Ref      |
| MW794162 | Unassigned | Unassigned | Unassigned | 513_0   | Clustered           | 39 VC_513_0  | 39 | 0.3078 | 1          | 0.3078 | 0 | 0 | 0 | 1 Ref      |
| MW794163 | Unassigned | Unassigned | Unassigned | 513_0   | Clustered           | 39 VC_513_0  | 39 | 0.3078 | 1          | 0.3078 | 0 | 0 | 0 | 1 Ref      |
| MW794164 | Unassigned | Unassigned | Unassigned | 513_0   | Clustered           | 39 VC_513_0  | 39 | 0.3078 | 1          | 0.3078 | 0 | 0 | 0 | 1 Ref      |
| MW794165 | Unassigned | Unassigned | Unassigned | 513_0   | Clustered           | 39 VC_513_0  | 39 | 0.3078 | 1          | 0.3078 | 0 | 0 | 0 | 1 Ref      |
| MW794166 | Unassigned | Unassigned | Unassigned | 513_0   | Clustered           | 39 VC_513_0  | 39 | 0.3078 | 1          | 0.3078 | 0 | 0 | 0 | 1 Ref      |
| MW794167 | Unassigned | Unassigned | Unassigned | 513_0   | Clustered           | 39 VC_513_0  | 39 | 0.3078 | 1          | 0.3078 | 0 | 0 | 0 | 1 Ref      |
| MW794168 | Unassigned | Unassigned | Unassigned | 513_0   | Clustered           | 39 VC_513_0  | 39 | 0.3078 | 1          | 0.3078 | 0 | 0 | 0 | 1 Ref      |
| MW794169 | Unassigned | Unassigned | Unassigned | 513_0   | Clustered           | 39 VC_513_0  | 39 | 0.3078 | 1          | 0.3078 | 0 | 0 | 0 | 1 Ref      |
| MW794170 | Unassigned | Unassigned | Unassigned | 513_0   | Clustered           | 39 VC_513_0  | 39 | 0.3078 | 1          | 0.3078 | 0 | 0 | 0 | 1 Ref      |
| MW794171 | Unassigned | Unassigned | Unassigned | 513_0   | Clustered           | 39 VC_513_0  | 39 | 0.3078 | 1          | 0.3078 | 0 | 0 | 0 | 1 Ref      |
| MW794172 | Unassigned | Unassigned | Unassigned | 513_0   | Clustered           | 39 VC_513_0  | 39 | 0.3078 | 1          | 0.3078 | 0 | 0 | 0 | 1 Ref      |
| MW794173 | Unassigned | Unassigned | Unassigned | 513_0   | Clustered           | 39 VC_513_0  | 39 | 0.3078 | 1          | 0.3078 | 0 | 0 | 0 | 1 Ref      |
| MW794174 | Unassigned | Unassigned | Unassigned | 513_1   | Clustered           | 41 VC_513_1  | 41 | 0.3276 | 1          | 0.3276 | 0 | 0 | 0 | 0.911 Ref  |
| MW794175 | Unassigned | Unassigned | Unassigned | 513_1   | Clustered           | 41 VC_513_1  | 41 | 0.3276 | 1          | 0.3276 | 0 | 0 | 0 | 0.911 Ref  |
| MW794176 | Unassigned | Unassigned | Unassigned | 513_0   | Clustered           | 39 VC_513_0  | 39 | 0.3078 | 1          | 0.3078 | 0 | 0 | 0 | 1 Ref      |
| MW794177 | Unassigned | Unassigned | Unassigned | 513_0   | Clustered           | 39 VC_513_0  | 39 | 0.3078 | 1          | 0.3078 | 0 | 0 | 0 | 1 Ref      |
| MW794178 | Unassigned | Unassigned | Unassigned | 513_1   | Clustered           | 41 VC_513_1  | 41 | 0.3276 | 1          | 0.3276 | 0 | 0 | 0 | 0.911 Ref  |
| MW794179 | Unassigned | Unassigned | Unassigned | 513_0   | Clustered           | 39 VC_513_0  | 39 | 0.3078 | 1          | 0.3078 | 0 | 0 | 0 | 1 Ref      |
| MW794180 | Unassigned | Unassigned | Unassigned | 513_0   | Clustered           | 39 VC_513_0  | 39 | 0.3078 | 1          | 0.3078 | 0 | 0 | 0 | 1 Ref      |
| MW794181 | Unassigned | Unassigned | Unassigned | 513_1   | Clustered           | 41 VC_513_1  | 41 | 0.3276 | 1          | 0.3276 | 0 | 0 | 0 | 0.911 Ref  |
| MW794182 | Unassigned | Unassigned | Unassigned | 513_0   | Clustered           | 39 VC_513_0  | 39 | 0.3078 | 1          | 0.3078 | 0 | 0 | 0 | 1 Ref      |
| MW794183 | Unassigned | Unassigned | Unassigned | 513_0   | Clustered           | 39 VC_513_0  | 39 | 0.3078 | 1          | 0.3078 | 0 | 0 | 0 | 1 Ref      |
| MW794184 | Unassigned | Unassigned | Unassigned | 513_1   | Clustered           | 41 VC_513_1  | 41 | 0.3276 | 1          | 0.3276 | 0 | 0 | 0 | 0.911 Ref  |
| MW794185 | Unassigned | Unassigned | Unassigned | 513_1   | Clustered           | 41 VC_513_1  | 41 | 0.3276 | 1          | 0.3276 | 0 | 0 | 0 | 0.911 Ref  |
| MW794186 | Unassigned | Unassigned | Unassigned | 513_1   | Clustered           | 41 VC_513_1  | 41 | 0.3276 | 1          | 0.3276 | 0 | 0 | 0 | 0.911 Ref  |
| MW794187 | Unassigned | Unassigned | Unassigned | 513_1   | Clustered           | 41 VC_513_1  | 41 | 0.3276 | 1          | 0.3276 | 0 | 0 | 0 | 0.911 Ref  |
| MW794188 | Unassigned | Unassigned | Unassigned | 513_0   | Clustered           | 39 VC_513_0  | 39 | 0.3078 | 1          | 0.3078 | 0 | 0 | 0 | 1 Ref      |
| MW794189 | Unassigned | Unassigned | Unassigned | 513_1   | Clustered           | 41 VC_513_1  | 41 | 0.3276 | 1          | 0.3276 | 0 | 0 | 0 | 0.911 Ref  |
| MW794190 | Unassigned | Unassigned | Unassigned | 513_0   | Clustered           | 39 VC_513_0  | 39 | 0.3078 | 1          | 0.3078 | 0 | 0 | 0 | 1 Ref      |
| MW794191 | Unassigned | Unassigned | Unassigned | 513_1   | Clustered           | 41 VC_513_1  | 41 | 0.3276 | 1          | 0.3276 | 0 | 0 | 0 | 0.911 Ref  |
| MW794192 | Unassigned | Unassigned | Unassigned | 513_1   | Clustered           | 41 VC_513_1  | 41 | 0.3276 | 1          | 0.3276 | 0 | 0 | 0 | 0.911 Ref  |
| MW802488 | Unassigned | Unassigned | Unassigned | 118_0   | Clustered           | 13 VC_118_0  | 13 | 1      | 1          | 1      | 0 | 0 | 0 | 1 Ref      |
| MW805361 | Unassigned | Unassigned | Unassigned | 600_0   | Clustered/Singleton | 1 VC_600_0   | 1  | 0      | 1          | 0      | 0 | 0 | 0 | 1 Ref      |
| MW805362 | Unassigned | Unassigned | Unassigned | 1066_0  | Clustered           | 2 VC_1066_0  | 2  | 0.2951 | 0.81445332 | 0.2404 | 0 | 0 | 0 | 1 Ref      |
| MW812338 | Unassigned | Unassigned | Unassigned | 994_2   | Clustered           | 5 VC_994_2   | 5  | 0.0483 | 0.88370509 | 0.0427 | 0 | 0 | 0 | 1 Ref      |
| MW812339 | Unassigned | Unassigned | Unassigned | 994_5   | Clustered           | 19 VC_994_5  | 19 | 0.2622 | 1          | 0.2622 | 0 | 0 | 0 | 1 Ref      |
| MW812340 | Unassigned | Unassigned | Unassigned | 994_1   | Clustered           | 8 VC_994_1   | 8  | 0.0877 | 0.92136649 | 0.0808 | 0 | 0 | 0 | 1 Ref      |
| MW812341 | Unassigned | Unassigned | Unassigned | 994_2   | Clustered           | 5 VC_994_2   | 5  | 0.0483 | 0.88370509 | 0.0427 | 0 | 0 | 0 | 1 Ref      |
| MW812342 | Unassigned | Unassigned | Unassigned | 994_1   | Clustered           | 8 VC_994_1   | 8  | 0.0877 | 0.92136649 | 0.0808 | 0 | 0 | 0 | 1 Ref      |
| MW812343 | Unassigned | Unassigned | Unassigned | 994_1   | Clustered           | 8 VC_994_1   | 8  | 0.0877 | 0.92136649 | 0.0808 | 0 | 0 | 0 | 1 Ref      |
| MW812345 | Unassigned | Unassigned | Unassigned | 131_0   | Clustered           | 43 VC_131_0  | 43 | 0.8853 | 1          | 0.8853 | 0 | 0 | 0 | 1 Ref      |
| MW815121 | Unassigned | Unassigned | Unassigned | 928_0   | Clustered           | 6 VC_928_0   | 6  | 0.4065 | 1          | 0.4065 | 0 | 0 | 0 | 1 Ref      |
| MW822006 | Unassigned | Unassigned | Unassigned | 859_0   | Clustered           | 67 VC_859_0  | 67 | 0.9622 | 1          | 0.9622 | 0 | 0 | 0 | 1 Ref      |
| MW822007 | Unassigned | Unassigned | Unassigned | 290_168 | Clustered/Singleton | 1 VC_290_168 | 1  | 0      | 1          | 0      | 0 | 0 | 0 | 1 Ref      |
| MW822008 | Unassigned | Unassigned | Unassigned | 170_11  | Clustered           | 10 VC_170_11 | 10 | 0.1502 | 0.99999797 | 0.1502 | 0 | 0 | 0 | 0.9111 Ref |
| MW822011 | Unassigned | Unassigned | Unassigned | 290_175 | Clustered/Singleton | 1 VC_290_175 | 1  | 0      | 1          | 0      | 0 | 0 | 0 | 1 Ref      |
| MW822143 | Unassigned | Unassigned | Unassigned | 230_0   | Clustered           | 38 VC_230_0  | 38 | 0.9076 | 1          | 0.9076 | 0 | 0 | 0 | 1 Ref      |
| MW822144 | Unassigned | Unassigned | Unassigned | 953_0   | Clustered           | 2 VC_953_0   | 2  | 0.1642 | 0.95556296 | 0.1569 | 0 | 0 | 0 | 1 Ref      |
| MW822145 | Unassigned | Unassigned | Unassigned | 1115_5  | Clustered           | 3 VC_1115_5  | 3  | 0.0473 | 0.98997321 | 0.0468 | 0 | 0 | 0 | 1 Ref      |
| MW822146 | Unassigned | Unassigned | Unassigned | 1136_0  | Clustered           | 40 VC_1136_0 | 40 | 0.8746 | 1          | 0.8746 | 0 | 0 | 0 | 1 Ref      |
| MW822147 | Unassigned | Unassigned | Unassigned | 1216_0  | Clustered           | 22 VC_1216_0 | 22 | 0.4546 | 1          | 0.4546 | 0 | 0 | 0 | 1 Ref      |
| MW822148 | Unassigned | Unassigned | Unassigned | 579_76  | Clustered/Singleton | 1 VC_579_76  | 1  | 0      | 1          | 0      | 0 | 0 | 0 | 1 Ref      |
| MW822535 | Unassigned | Unassigned | Unassigned | 118_0   | Clustered           | 13 VC_118_0  | 13 | 1      | 1          | 1      | 0 | 0 | 0 | 1 Ref      |
| MW822536 | Unassigned | Unassigned | Unassigned | 118_0   | Clustered           | 13 VC_118_0  | 13 | 1      | 1          | 1      | 0 | 0 | 0 | 1 Ref      |
| MW822537 | Unassigned | Unassigned | Unassigned | 118_0   | Clustered           | 13 VC_118_0  | 13 | 1      | 1          | 1      | 0 | 0 | 0 | 1 Ref      |
| MW822538 | Unassigned | Unassigned | Unassigned | 118_0   | Clustered           | 13 VC_118_0  | 13 | 1      | 1          | 1      | 0 | 0 | 0 | 1 Ref      |
| MW822539 | Unassigned | Unassigned | Unassigned | 118_0   | Clustered           | 13 VC_118_0  | 13 | 1      | 1          | 1      | 0 | 0 | 0 | 1 Ref      |
| MW822601 | Unassigned | Unassigned | Unassigned | 498_0   | Clustered           | 4 VC_498_0   | 4  | 0.2907 | 0.99998435 | 0.2907 | 0 | 0 | 0 | 1 Ref      |
| MW824369 | Unassigned | Unassigned | Unassigned | 665_0   | Clustered           | 29 VC_665_0  | 29 | 0.9121 | 1          | 0.9121 | 0 | 0 | 0 | 1 Ref      |
| MW824370 | Unassigned | Unassigned | Unassigned | 137_1   | Clustered           | 2 VC_137_1   | 2  | 0.0293 | 0.95557637 | 0.028  | 0 | 0 | 0 | 1 Ref      |
| MW824371 | Unassigned | Unassigned | Unassigned | 511_12  | Clustered           | 2 VC_511_12  | 2  | 0.0322 | 0.95557924 | 0.0307 | 0 | 0 | 0 | 1 Ref      |
| MW824372 | Unassigned | Unassigned | Unassigned | 511_12  | Clustered           | 2 VC_511_12  | 2  | 0.0322 | 0.95557924 | 0.0307 | 0 | 0 | 0 | 1 Ref      |
| MW824373 | Unassigned | Unassigned | Unassigned | 665_0   | Clustered           | 29 VC_665_0  | 29 | 0.9121 | 1          | 0.9121 | 0 | 0 | 0 | 1 Ref      |
| MW824374 | Unassigned | Unassigned | Unassigned | 665_0   | Clustered           | 29 VC_665_0  | 29 | 0.9121 | 1          | 0.9121 | 0 | 0 | 0 | 1 Ref      |
| MW824375 | Unassigned | Unassigned | Unassigned | 137_1   | Clustered           | 2 VC_137_1   | 2  | 0.0293 | 0.95557637 | 0.028  | 0 | 0 | 0 | 1 Ref      |
| MW824376 | Unassigned | Unassigned | Unassigned | 511_13  | Clustered/Singleton | 1 VC_511_13  | 1  | 0      | 1          | 0      | 0 | 0 | 0 | 1 Ref      |
| MW824377 | Unassigned | Unassigned | Unassigned | 549_3   | Clustered/Singleton | 1 VC_549_3   | 1  | 0      | 1          | 0      | 0 | 0 | 0 | 1 Ref      |
| MW824378 | Unassigned | Unassigned | Unassigned | 665_0   | Clustered           | 29 VC_665_0  | 29 | 0.9121 | 1          | 0.9121 | 0 | 0 | 0 | 1 Ref      |
| MW824379 | Unassigned | Unassigned | Unassigned | 665_0   | Clustered           | 29 VC_665_0  | 29 | 0.9121 | 1          | 0.9121 | 0 | 0 | 0 | 1 Ref      |
| MW824380 | Unassigned | Unassigned | Unassigned | 516_0   | Clustered           | 24 VC_516_0  | 24 | 0.8556 | 1          | 0.8556 | 0 | 0 | 0 | 0.9493 Ref |
| MW824381 | Unassigned | Unassigned | Unassigned | 516_0   | Clustered           | 24 VC_516_0  | 24 | 0.8556 | 1          | 0.8556 | 0 | 0 | 0 | 0.9493 Ref |
| MW824382 | Unassigned | Unassigned | Unassigned | 516_0   | Clustered           | 24 VC_516_0  | 24 | 0.8556 | 1          | 0.8556 | 0 | 0 | 0 | 0.9493 Ref |
| MW824383 | Unassigned | Unassigned | Unassigned | 665_0   | Clustered           | 29 VC_665_0  | 29 | 0.9121 | 1          | 0.9121 | 0 | 0 | 0 | 1 Ref      |
| MW824384 | Unassigned | Unassigned | Unassigned | 1282_0  | Clustered           | 7 VC_1282_0  | 7  | 0.992  | 0.99999987 | 0.992  | 0 | 0 | 0 | 1 Ref      |
| MW824385 | Unassigned | Unassigned | Unassigned | 1282_0  | Clustered           | 7 VC_1282_0  | 7  | 0.992  | 0.99999987 | 0.992  | 0 | 0 | 0 | 1 Ref      |
| MW824386 | Unassigned | Unassigned | Unassigned | 1282_0  | Clustered           | 7 VC_1282_0  | 7  | 0.992  | 0.99999987 | 0.992  | 0 | 0 | 0 | 1 Ref      |
| MW824387 | Unassigned | Unassigned | Unassigned | 627_0   | Clustered           | 16 VC_627_0  | 16 | 0.9168 | 1          | 0.9168 | 0 | 0 | 0 | 1 Ref      |
| MW824388 | Unassigned | Unassigned | Unassigned | 831_0   | Clustered           | 17 VC_831_0  | 17 | 0.9057 | 1          | 0.9057 | 0 | 0 | 0 | 1 Ref      |
| MW824389 | Unassigned | Unassigned | Unassigned | 831_0   | Clustered           | 17 VC_831_0  | 17 | 0.9057 | 1          | 0.9057 | 0 | 0 | 0 | 1 Ref      |



|          |            |            |            |         |                     |              |     |        |            |        |   |   |   |            |
|----------|------------|------------|------------|---------|---------------------|--------------|-----|--------|------------|--------|---|---|---|------------|
| MW824391 | Unassigned | Unassigned | Unassigned | 547_0   | Clustered           | 2 VC_547_0   | 2   | 0.5153 | 0.94987899 | 0.4894 | 0 | 0 | 0 | 1 Ref      |
| MW824392 | Unassigned | Unassigned | Unassigned | 831_0   | Clustered           | 17 VC_831_0  | 17  | 0.9057 | 1          | 0.9057 | 0 | 0 | 0 | 1 Ref      |
| MW824393 | Unassigned | Unassigned | Unassigned | 831_0   | Clustered           | 17 VC_831_0  | 17  | 0.9057 | 1          | 0.9057 | 0 | 0 | 0 | 1 Ref      |
| MW824394 | Unassigned | Unassigned | Unassigned | 831_0   | Clustered           | 17 VC_831_0  | 17  | 0.9057 | 1          | 0.9057 | 0 | 0 | 0 | 1 Ref      |
| MW824395 | Unassigned | Unassigned | Unassigned | 1282_0  | Clustered           | 7 VC_1282_0  | 7   | 0.992  | 0.99999987 | 0.992  | 0 | 0 | 0 | 1 Ref      |
| MW824396 | Unassigned | Unassigned | Unassigned | 1282_0  | Clustered           | 7 VC_1282_0  | 7   | 0.992  | 0.99999987 | 0.992  | 0 | 0 | 0 | 1 Ref      |
| MW824397 | Unassigned | Unassigned | Unassigned | 1282_0  | Clustered           | 7 VC_1282_0  | 7   | 0.992  | 0.99999987 | 0.992  | 0 | 0 | 0 | 1 Ref      |
| MW824398 | Unassigned | Unassigned | Unassigned | 831_0   | Clustered           | 17 VC_831_0  | 17  | 0.9057 | 1          | 0.9057 | 0 | 0 | 0 | 1 Ref      |
| MW824399 | Unassigned | Unassigned | Unassigned | 831_0   | Clustered           | 17 VC_831_0  | 17  | 0.9057 | 1          | 0.9057 | 0 | 0 | 0 | 1 Ref      |
| MW824400 | Unassigned | Unassigned | Unassigned | 932_0   | Clustered           | 5 VC_932_0   | 5   | 0.9252 | 0.99999497 | 0.9252 | 0 | 0 | 0 | 1 Ref      |
| MW824401 | Unassigned | Unassigned | Unassigned | 547_0   | Clustered           | 2 VC_547_0   | 2   | 0.5153 | 0.94987899 | 0.4894 | 0 | 0 | 0 | 1 Ref      |
| MW824402 | Unassigned | Unassigned | Unassigned | 831_0   | Clustered           | 17 VC_831_0  | 17  | 0.9057 | 1          | 0.9057 | 0 | 0 | 0 | 1 Ref      |
| MW824403 | Unassigned | Unassigned | Unassigned | 831_0   | Clustered           | 17 VC_831_0  | 17  | 0.9057 | 1          | 0.9057 | 0 | 0 | 0 | 1 Ref      |
| MW824404 | Unassigned | Unassigned | Unassigned | 627_0   | Clustered           | 16 VC_627_0  | 16  | 0.9168 | 1          | 0.9168 | 0 | 0 | 0 | 1 Ref      |
| MW824405 | Unassigned | Unassigned | Unassigned | 831_0   | Clustered           | 17 VC_831_0  | 17  | 0.9057 | 1          | 0.9057 | 0 | 0 | 0 | 1 Ref      |
| MW824406 | Unassigned | Unassigned | Unassigned | 303_0   | Clustered           | 6 VC_303_0   | 6   | 0.5341 | 1          | 0.5341 | 0 | 0 | 0 | 1 Ref      |
| MW824407 | Unassigned | Unassigned | Unassigned | 775_0   | Clustered           | 18 VC_775_0  | 18  | 0.7364 | 1          | 0.7364 | 0 | 0 | 0 | 1 Ref      |
| MW824408 | Unassigned | Unassigned | Unassigned | 775_0   | Clustered           | 18 VC_775_0  | 18  | 0.7364 | 1          | 0.7364 | 0 | 0 | 0 | 1 Ref      |
| MW824409 | Unassigned | Unassigned | Unassigned | 775_0   | Clustered           | 18 VC_775_0  | 18  | 0.7364 | 1          | 0.7364 | 0 | 0 | 0 | 1 Ref      |
| MW824412 | Unassigned | Unassigned | Unassigned | 661_4   | Clustered           | 2 VC_661_4   | 2   | 0.0516 | 0.95604481 | 0.0493 | 0 | 0 | 0 | 1 Ref      |
| MW824413 | Unassigned | Unassigned | Unassigned | 661_4   | Clustered           | 2 VC_661_4   | 2   | 0.0516 | 0.95604481 | 0.0493 | 0 | 0 | 0 | 1 Ref      |
| MW824414 | Unassigned | Unassigned | Unassigned | 934_0   | Clustered           | 7 VC_934_0   | 7   | 0.7358 | 1          | 0.7358 | 0 | 0 | 0 | 1 Ref      |
| MW824415 | Unassigned | Unassigned | Unassigned | 1009_0  | Clustered           | 8 VC_1009_0  | 8   | 0.4673 | 1          | 0.4673 | 0 | 0 | 0 | 1 Ref      |
| MW824416 | Unassigned | Unassigned | Unassigned | 1009_0  | Clustered           | 8 VC_1009_0  | 8   | 0.4673 | 1          | 0.4673 | 0 | 0 | 0 | 1 Ref      |
| MW824417 | Unassigned | Unassigned | Unassigned | 932_0   | Clustered           | 5 VC_932_0   | 5   | 0.9252 | 0.99999497 | 0.9252 | 0 | 0 | 0 | 1 Ref      |
| MW824418 | Unassigned | Unassigned | Unassigned | 1091_1  | Clustered           | 29 VC_1091_1 | 29  | 0.4856 | 1          | 0.4856 | 0 | 0 | 0 | 0.9581 Ref |
| MW824419 | Unassigned | Unassigned | Unassigned | 1009_0  | Clustered           | 8 VC_1009_0  | 8   | 0.4673 | 1          | 0.4673 | 0 | 0 | 0 | 1 Ref      |
| MW824420 | Unassigned | Unassigned | Unassigned | 934_0   | Clustered           | 7 VC_934_0   | 7   | 0.7358 | 1          | 0.7358 | 0 | 0 | 0 | 1 Ref      |
| MW824421 | Unassigned | Unassigned | Unassigned | 932_0   | Clustered           | 5 VC_932_0   | 5   | 0.9252 | 0.99999497 | 0.9252 | 0 | 0 | 0 | 1 Ref      |
| MW824422 | Unassigned | Unassigned | Unassigned | 1009_0  | Clustered           | 8 VC_1009_0  | 8   | 0.4673 | 1          | 0.4673 | 0 | 0 | 0 | 1 Ref      |
| MW824423 | Unassigned | Unassigned | Unassigned | 1009_0  | Clustered           | 8 VC_1009_0  | 8   | 0.4673 | 1          | 0.4673 | 0 | 0 | 0 | 1 Ref      |
| MW824424 | Unassigned | Unassigned | Unassigned | 1009_0  | Clustered           | 8 VC_1009_0  | 8   | 0.4673 | 1          | 0.4673 | 0 | 0 | 0 | 1 Ref      |
| MW824425 | Unassigned | Unassigned | Unassigned | 1009_0  | Clustered           | 8 VC_1009_0  | 8   | 0.4673 | 1          | 0.4673 | 0 | 0 | 0 | 1 Ref      |
| MW824426 | Unassigned | Unassigned | Unassigned | 1009_0  | Clustered           | 8 VC_1009_0  | 8   | 0.4673 | 1          | 0.4673 | 0 | 0 | 0 | 1 Ref      |
| MW824427 | Unassigned | Unassigned | Unassigned | 934_0   | Clustered           | 7 VC_934_0   | 7   | 0.7358 | 1          | 0.7358 | 0 | 0 | 0 | 1 Ref      |
| MW824428 | Unassigned | Unassigned | Unassigned | 934_0   | Clustered           | 7 VC_934_0   | 7   | 0.7358 | 1          | 0.7358 | 0 | 0 | 0 | 1 Ref      |
| MW824429 | Unassigned | Unassigned | Unassigned | 934_0   | Clustered           | 7 VC_934_0   | 7   | 0.7358 | 1          | 0.7358 | 0 | 0 | 0 | 1 Ref      |
| MW824430 | Unassigned | Unassigned | Unassigned | 1091_1  | Clustered           | 29 VC_1091_1 | 29  | 0.4856 | 1          | 0.4856 | 0 | 0 | 0 | 0.9581 Ref |
| MW824431 | Unassigned | Unassigned | Unassigned | 932_0   | Clustered           | 5 VC_932_0   | 5   | 0.9252 | 0.99999497 | 0.9252 | 0 | 0 | 0 | 1 Ref      |
| MW824432 | Unassigned | Unassigned | Unassigned | 1091_1  | Clustered           | 29 VC_1091_1 | 29  | 0.4856 | 1          | 0.4856 | 0 | 0 | 0 | 0.9581 Ref |
| MW824433 | Unassigned | Unassigned | Unassigned | 1091_1  | Clustered           | 29 VC_1091_1 | 29  | 0.4856 | 1          | 0.4856 | 0 | 0 | 0 | 0.9581 Ref |
| MW824434 | Unassigned | Unassigned | Unassigned | 1091_1  | Clustered           | 29 VC_1091_1 | 29  | 0.4856 | 1          | 0.4856 | 0 | 0 | 0 | 0.9581 Ref |
| MW835180 | Unassigned | Unassigned | Unassigned | 479_0   | Clustered           | 7 VC_479_0   | 7   | 0.3294 | 1          | 0.3294 | 0 | 0 | 0 | 1 Ref      |
| MW845758 | Unassigned | Unassigned | Unassigned | 994_3   | Clustered           | 3 VC_994_3   | 3   | 0.0236 | 0.75215638 | 0.0178 | 0 | 0 | 0 | 1 Ref      |
| MW845759 | Unassigned | Unassigned | Unassigned | 994_0   | Clustered           | 5 VC_994_0   | 5   | 0.0495 | 0.99983811 | 0.0494 | 0 | 0 | 0 | 1 Ref      |
| MW845760 | Unassigned | Unassigned | Unassigned | 507_0   | Clustered           | 3 VC_507_0   | 3   | 0.0676 | 0.98259158 | 0.0664 | 0 | 0 | 0 | 1 Ref      |
| MW862109 | Unassigned | Unassigned | Unassigned | 305_1   | Clustered/Singleton | 1 VC_305_1   | 1   | 0      | 1          | 0      | 0 | 0 | 0 | 1 Ref      |
| MW862804 | Unassigned | Unassigned | Unassigned | 859_0   | Clustered           | 67 VC_859_0  | 67  | 0.9622 | 1          | 0.9622 | 0 | 0 | 0 | 1 Ref      |
| MW862979 | Unassigned | Unassigned | Unassigned | 243_0   | Clustered           | 72 VC_243_0  | 72  | 0.8089 | 1          | 0.8089 | 0 | 0 | 0 | 1 Ref      |
| MW862980 | Unassigned | Unassigned | Unassigned | 384_11  | Clustered           | 31 VC_384_11 | 31  | 0.0926 | 1          | 0.0926 | 0 | 0 | 0 | 0.7011 Ref |
| MW862981 | Unassigned | Unassigned | Unassigned | 1249_0  | Clustered           | 8 VC_1249_0  | 8   | 0.191  | 1          | 0.191  | 0 | 0 | 0 | 1 Ref      |
| MW862982 | Unassigned | Unassigned | Unassigned | 1116_0  | Clustered           | 24 VC_1116_0 | 24  | 0.8376 | 1          | 0.8376 | 0 | 0 | 0 | 1 Ref      |
| MW862983 | Unassigned | Unassigned | Unassigned | 335_30  | Clustered           | 3 VC_335_30  | 3   | 0.0115 | 0.99857442 | 0.0115 | 0 | 0 | 0 | 1 Ref      |
| MW862984 | Unassigned | Unassigned | Unassigned | 243_0   | Clustered           | 72 VC_243_0  | 72  | 0.8089 | 1          | 0.8089 | 0 | 0 | 0 | 1 Ref      |
| MW862985 | Unassigned | Unassigned | Unassigned | 243_0   | Clustered           | 72 VC_243_0  | 72  | 0.8089 | 1          | 0.8089 | 0 | 0 | 0 | 1 Ref      |
| MW862986 | Unassigned | Unassigned | Unassigned | 1226_0  | Clustered           | 5 VC_1226_0  | 5   | 0.6594 | 0.99999982 | 0.6594 | 0 | 0 | 0 | 1 Ref      |
| MW862987 | Unassigned | Unassigned | Unassigned | 898_1   | Clustered           | 27 VC_898_1  | 27  | 0.8894 | 1          | 0.8894 | 0 | 0 | 0 | 1 Ref      |
| MW862988 | Unassigned | Unassigned | Unassigned | 952_0   | Clustered           | 39 VC_952_0  | 39  | 0.9064 | 1          | 0.9064 | 0 | 0 | 0 | 1 Ref      |
| MW862990 | Unassigned | Unassigned | Unassigned | 243_0   | Clustered           | 72 VC_243_0  | 72  | 0.8089 | 1          | 0.8089 | 0 | 0 | 0 | 1 Ref      |
| MW862991 | Unassigned | Unassigned | Unassigned | 1424_0  | Clustered           | 31 VC_1424_0 | 31  | 0.8834 | 1          | 0.8834 | 0 | 0 | 0 | 1 Ref      |
| MW862992 | Unassigned | Unassigned | Unassigned | 1211_2  | Clustered           | 2 VC_1211_2  | 2   | 0.0765 | 0.95418906 | 0.073  | 0 | 0 | 0 | 1 Ref      |
| MW862993 | Unassigned | Unassigned | Unassigned | 384_11  | Clustered           | 31 VC_384_11 | 31  | 0.0926 | 1          | 0.0926 | 0 | 0 | 0 | 0.7011 Ref |
| MW865291 | Unassigned | Unassigned | Unassigned | 1067_0  | Clustered           | 20 VC_1067_0 | 20  | 0.7109 | 1          | 0.7109 | 0 | 0 | 0 | 1 Ref      |
| MW865292 | Unassigned | Unassigned | Unassigned | 181_0   | Clustered           | 4 VC_181_0   | 4   | 0.3817 | 0.99998259 | 0.3817 | 0 | 0 | 0 | 1 Ref      |
| MW865297 | Unassigned | Unassigned | Unassigned | 775_0   | Clustered           | 18 VC_775_0  | 18  | 0.7364 | 1          | 0.7364 | 0 | 0 | 0 | 1 Ref      |
| MW865299 | Unassigned | Unassigned | Unassigned | 775_0   | Clustered           | 18 VC_775_0  | 18  | 0.7364 | 1          | 0.7364 | 0 | 0 | 0 | 1 Ref      |
| MW865302 | Unassigned | Unassigned | Unassigned | 775_0   | Clustered           | 18 VC_775_0  | 18  | 0.7364 | 1          | 0.7364 | 0 | 0 | 0 | 1 Ref      |
| MW865307 | Unassigned | Unassigned | Unassigned | 775_0   | Clustered           | 18 VC_775_0  | 18  | 0.7364 | 1          | 0.7364 | 0 | 0 | 0 | 1 Ref      |
| MW865319 | Unassigned | Unassigned | Unassigned | 934_0   | Clustered           | 7 VC_934_0   | 7   | 0.7358 | 1          | 0.7358 | 0 | 0 | 0 | 1 Ref      |
| MW876471 | Unassigned | Unassigned | Unassigned | 465_0   | Clustered           | 80 VC_465_0  | 80  | 0.9988 | 1          | 0.9988 | 0 | 0 | 0 | 1 Ref      |
| MW879340 | Unassigned | Unassigned | Unassigned | 507_0   | Clustered           | 3 VC_507_0   | 3   | 0.0676 | 0.98259158 | 0.0664 | 0 | 0 | 0 | 1 Ref      |
| MW879342 | Unassigned | Unassigned | Unassigned | 170_7   | Clustered           | 7 VC_170_7   | 7   | 0.0952 | 0.99874946 | 0.0951 | 0 | 0 | 0 | 1 Ref      |
| MW879343 | Unassigned | Unassigned | Unassigned | 170_7   | Clustered           | 7 VC_170_7   | 7   | 0.0952 | 0.99874946 | 0.0951 | 0 | 0 | 0 | 1 Ref      |
| MW879344 | Unassigned | Unassigned | Unassigned | 170_7   | Clustered           | 7 VC_170_7   | 7   | 0.0952 | 0.99874946 | 0.0951 | 0 | 0 | 0 | 1 Ref      |
| MW882907 | Unassigned | Unassigned | Unassigned | 293_11  | Clustered           | 3 VC_293_11  | 3   | 0.0146 | 0.93460284 | 0.0136 | 0 | 0 | 0 | 1 Ref      |
| MW883059 | Unassigned | Unassigned | Unassigned | 290_172 | Clustered/Singleton | 1 VC_290_172 | 1   | 0      | 1          | 0      | 0 | 0 | 0 | 1 Ref      |
| MW883060 | Unassigned | Unassigned | Unassigned | 405_0   | Clustered           | 126 VC_405_0 | 126 | 0.9614 | 1          | 0.9614 | 0 | 0 | 0 | 1 Ref      |
| MW883061 | Unassigned | Unassigned | Unassigned | 794_4   | Clustered           | 4 VC_794_4   | 4   | 0.0181 | 0.73018303 | 0.0132 | 0 | 0 | 0 | 1 Ref      |
| MW900438 | Unassigned | Unassigned | Unassigned | 1092_0  | Clustered           | 2 VC_1092_0  | 2   | 1      | 1          | 1      | 0 | 0 | 0 | 1 Ref      |
| MW911612 | Unassigned | Unassigned | Unassigned | 513_1   | Clustered           | 41 VC_513_1  | 41  | 0.3276 | 1          | 0.3276 | 0 | 0 | 0 | 0.911 Ref  |
| MW911613 | Unassigned | Unassigned | Unassigned | 513_1   | Clustered           | 41 VC_513_1  | 41  | 0.3276 | 1          | 0.3276 | 0 | 0 | 0 | 0.911 Ref  |



|          |            |            |            |         |                     |              |     |        |            |        |   |   |   |        |     |
|----------|------------|------------|------------|---------|---------------------|--------------|-----|--------|------------|--------|---|---|---|--------|-----|
| MW911614 | Unassigned | Unassigned | Unassigned | 513_1   | Clustered           | 41 VC_513_1  | 41  | 0.3276 | 1          | 0.3276 | 0 | 0 | 0 | 0.911  | Ref |
| MW911615 | Unassigned | Unassigned | Unassigned | 513_1   | Clustered           | 41 VC_513_1  | 41  | 0.3276 | 1          | 0.3276 | 0 | 0 | 0 | 0.911  | Ref |
| MW916539 | Unassigned | Unassigned | Unassigned | 854_0   | Clustered           | 6 VC_854_0   | 6   | 0.514  | 1          | 0.514  | 0 | 0 | 0 | 1      | Ref |
| MW924497 | Unassigned | Unassigned | Unassigned | 8_0     | Clustered           | 58 VC_8_0    | 58  | 0.8285 | 1          | 0.8285 | 0 | 0 | 0 | 0.9946 | Ref |
| MW924638 | Unassigned | Unassigned | Unassigned | 1212_0  | Clustered           | 21 VC_1212_0 | 21  | 0.711  | 1          | 0.711  | 0 | 0 | 0 | 1      | Ref |
| MW924639 | Unassigned | Unassigned | Unassigned | 834_0   | Clustered           | 18 VC_834_0  | 18  | 0.9116 | 1          | 0.9116 | 0 | 0 | 0 | 1      | Ref |
| MW924640 | Unassigned | Unassigned | Unassigned | 1287_0  | Clustered           | 44 VC_1287_0 | 44  | 1      | 1          | 1      | 0 | 0 | 0 | 1      | Ref |
| MW924642 | Unassigned | Unassigned | Unassigned | 1407_0  | Clustered           | 78 VC_1407_0 | 78  | 0.9731 | 1          | 0.9731 | 0 | 0 | 0 | 1      | Ref |
| MW924643 | Unassigned | Unassigned | Unassigned | 223_6   | Clustered           | 42 VC_223_6  | 42  | 0.4717 | 1          | 0.4717 | 0 | 0 | 0 | 0.8351 | Ref |
| MW924644 | Unassigned | Unassigned | Unassigned | 527_0   | Clustered           | 37 VC_527_0  | 37  | 0.9679 | 1          | 0.9679 | 0 | 0 | 0 | 1      | Ref |
| MW924645 | Unassigned | Unassigned | Unassigned | 1136_0  | Clustered           | 40 VC_1136_0 | 40  | 0.8746 | 1          | 0.8746 | 0 | 0 | 0 | 1      | Ref |
| MW924646 | Unassigned | Unassigned | Unassigned | 222_1   | Clustered           | 19 VC_222_1  | 19  | 0.4166 | 1          | 0.4166 | 0 | 0 | 0 | 1      | Ref |
| MW924647 | Unassigned | Unassigned | Unassigned | 1287_0  | Clustered           | 44 VC_1287_0 | 44  | 1      | 1          | 1      | 0 | 0 | 0 | 1      | Ref |
| MW924648 | Unassigned | Unassigned | Unassigned | 543_0   | Clustered           | 25 VC_543_0  | 25  | 0.4584 | 1          | 0.4584 | 0 | 0 | 0 | 1      | Ref |
| MW924649 | Unassigned | Unassigned | Unassigned | 538_31  | Clustered           | 11 VC_538_31 | 11  | 0.0894 | 1          | 0.0894 | 0 | 0 | 0 | 0.6    | Ref |
| MW924650 | Unassigned | Unassigned | Unassigned | 543_0   | Clustered           | 25 VC_543_0  | 25  | 0.4584 | 1          | 0.4584 | 0 | 0 | 0 | 1      | Ref |
| MW924889 | Unassigned | Unassigned | Unassigned | 10_0    | Clustered           | 25 VC_10_0   | 25  | 0.3437 | 1          | 0.3437 | 0 | 0 | 0 | 0.9733 | Ref |
| MW926912 | Unassigned | Unassigned | Unassigned | 714_0   | Clustered           | 71 VC_714_0  | 71  | 0.935  | 1          | 0.935  | 0 | 0 | 0 | 1      | Ref |
| MW927511 | Unassigned | Unassigned | Unassigned | 725_0   | Clustered           | 47 VC_725_0  | 47  | 0.8649 | 1          | 0.8649 | 0 | 0 | 0 | 1      | Ref |
| MW927513 | Unassigned | Unassigned | Unassigned | 725_0   | Clustered           | 47 VC_725_0  | 47  | 0.8649 | 1          | 0.8649 | 0 | 0 | 0 | 1      | Ref |
| MW927514 | Unassigned | Unassigned | Unassigned | 725_0   | Clustered           | 47 VC_725_0  | 47  | 0.8649 | 1          | 0.8649 | 0 | 0 | 0 | 1      | Ref |
| MW927515 | Unassigned | Unassigned | Unassigned | 725_0   | Clustered           | 47 VC_725_0  | 47  | 0.8649 | 1          | 0.8649 | 0 | 0 | 0 | 1      | Ref |
| MW927516 | Unassigned | Unassigned | Unassigned | 725_0   | Clustered           | 47 VC_725_0  | 47  | 0.8649 | 1          | 0.8649 | 0 | 0 | 0 | 1      | Ref |
| MW927517 | Unassigned | Unassigned | Unassigned | 725_0   | Clustered           | 47 VC_725_0  | 47  | 0.8649 | 1          | 0.8649 | 0 | 0 | 0 | 1      | Ref |
| MW927519 | Unassigned | Unassigned | Unassigned | 725_0   | Clustered           | 47 VC_725_0  | 47  | 0.8649 | 1          | 0.8649 | 0 | 0 | 0 | 1      | Ref |
| MW927520 | Unassigned | Unassigned | Unassigned | 725_0   | Clustered           | 47 VC_725_0  | 47  | 0.8649 | 1          | 0.8649 | 0 | 0 | 0 | 1      | Ref |
| MW927521 | Unassigned | Unassigned | Unassigned | 725_0   | Clustered           | 47 VC_725_0  | 47  | 0.8649 | 1          | 0.8649 | 0 | 0 | 0 | 1      | Ref |
| MW927522 | Unassigned | Unassigned | Unassigned | 725_0   | Clustered           | 47 VC_725_0  | 47  | 0.8649 | 1          | 0.8649 | 0 | 0 | 0 | 1      | Ref |
| MW927523 | Unassigned | Unassigned | Unassigned | 725_0   | Clustered           | 47 VC_725_0  | 47  | 0.8649 | 1          | 0.8649 | 0 | 0 | 0 | 1      | Ref |
| MW927524 | Unassigned | Unassigned | Unassigned | 725_0   | Clustered           | 47 VC_725_0  | 47  | 0.8649 | 1          | 0.8649 | 0 | 0 | 0 | 1      | Ref |
| MW927525 | Unassigned | Unassigned | Unassigned | 725_0   | Clustered           | 47 VC_725_0  | 47  | 0.8649 | 1          | 0.8649 | 0 | 0 | 0 | 1      | Ref |
| MW929175 | Unassigned | Unassigned | Unassigned | 772_0   | Clustered           | 9 VC_772_0   | 9   | 0.4468 | 1          | 0.4468 | 0 | 0 | 0 | 1      | Ref |
| MW929182 | Unassigned | Unassigned | Unassigned | 837_1   | Clustered           | 24 VC_837_1  | 24  | 0.5328 | 1          | 0.5328 | 0 | 0 | 0 | 1      | Ref |
| MW934263 | Unassigned | Unassigned | Unassigned | 115_0   | Clustered           | 9 VC_115_0   | 9   | 0.5166 | 1          | 0.5166 | 0 | 0 | 0 | 1      | Ref |
| MW960029 | Unassigned | Unassigned | Unassigned | 1468_0  | Clustered           | 28 VC_1468_0 | 28  | 0.7511 | 1          | 0.7511 | 0 | 0 | 0 | 1      | Ref |
| MW960030 | Unassigned | Unassigned | Unassigned | 739_0   | Clustered           | 3 VC_739_0   | 3   | 0.1567 | 0.99815158 | 0.1564 | 0 | 0 | 0 | 1      | Ref |
| MW960031 | Unassigned | Unassigned | Unassigned | 126_0   | Clustered           | 2 VC_126_0   | 2   | 0.373  | 0.95337092 | 0.3556 | 0 | 0 | 0 | 1      | Ref |
| MW960032 | Unassigned | Unassigned | Unassigned | 792_0   | Clustered           | 5 VC_792_0   | 5   | 0.8313 | 0.99999405 | 0.8313 | 0 | 0 | 0 | 1      | Ref |
| MW960034 | Unassigned | Unassigned | Unassigned | 1020_0  | Clustered           | 22 VC_1020_0 | 22  | 0.895  | 1          | 0.895  | 0 | 0 | 0 | 1      | Ref |
| MW960035 | Unassigned | Unassigned | Unassigned | 1468_0  | Clustered           | 28 VC_1468_0 | 28  | 0.7511 | 1          | 0.7511 | 0 | 0 | 0 | 1      | Ref |
| MW960036 | Unassigned | Unassigned | Unassigned | 805_0   | Clustered           | 3 VC_805_0   | 3   | 0.0632 | 0.99854868 | 0.0631 | 0 | 0 | 0 | 1      | Ref |
| MW960038 | Unassigned | Unassigned | Unassigned | 805_0   | Clustered           | 3 VC_805_0   | 3   | 0.0632 | 0.99854868 | 0.0631 | 0 | 0 | 0 | 1      | Ref |
| MW978786 | Unassigned | Unassigned | Unassigned | 617_0   | Clustered           | 6 VC_617_0   | 6   | 0.1792 | 1          | 0.1792 | 0 | 0 | 0 | 1      | Ref |
| MW980062 | Unassigned | Unassigned | Unassigned | 1020_0  | Clustered           | 22 VC_1020_0 | 22  | 0.895  | 1          | 0.895  | 0 | 0 | 0 | 1      | Ref |
| MW980063 | Unassigned | Unassigned | Unassigned | 70_0    | Clustered           | 5 VC_70_0    | 5   | 0.9939 | 0.99995803 | 0.9939 | 0 | 0 | 0 | 1      | Ref |
| MW980064 | Unassigned | Unassigned | Unassigned | 70_0    | Clustered           | 5 VC_70_0    | 5   | 0.9939 | 0.99995803 | 0.9939 | 0 | 0 | 0 | 1      | Ref |
| MW980065 | Unassigned | Unassigned | Unassigned | 1020_0  | Clustered           | 22 VC_1020_0 | 22  | 0.895  | 1          | 0.895  | 0 | 0 | 0 | 1      | Ref |
| MW980067 | Unassigned | Unassigned | Unassigned | 1468_0  | Clustered           | 28 VC_1468_0 | 28  | 0.7511 | 1          | 0.7511 | 0 | 0 | 0 | 1      | Ref |
| MW980068 | Unassigned | Unassigned | Unassigned | 939_0   | Clustered           | 3 VC_939_0   | 3   | 0.5055 | 0.9972453  | 0.5041 | 0 | 0 | 0 | 1      | Ref |
| MW980069 | Unassigned | Unassigned | Unassigned | 1006_0  | Clustered           | 9 VC_1006_0  | 9   | 0.9673 | 1          | 0.9673 | 0 | 0 | 0 | 1      | Ref |
| MW980070 | Unassigned | Unassigned | Unassigned | 497_0   | Clustered           | 4 VC_497_0   | 4   | 0.0962 | 0.999525   | 0.0961 | 0 | 0 | 0 | 1      | Ref |
| MW980073 | Unassigned | Unassigned | Unassigned | 980_0   | Clustered           | 11 VC_980_0  | 11  | 0.7333 | 1          | 0.7333 | 0 | 0 | 0 | 1      | Ref |
| MW980074 | Unassigned | Unassigned | Unassigned | 1020_0  | Clustered           | 22 VC_1020_0 | 22  | 0.895  | 1          | 0.895  | 0 | 0 | 0 | 1      | Ref |
| MZ004649 | Unassigned | Unassigned | Unassigned | 560_0   | Clustered           | 15 VC_560_0  | 15  | 0.2846 | 1          | 0.2846 | 0 | 0 | 0 | 1      | Ref |
| MZ005670 | Unassigned | Unassigned | Unassigned | 1203_0  | Clustered           | 28 VC_1203_0 | 28  | 0.4905 | 1          | 0.4905 | 0 | 0 | 0 | 1      | Ref |
| MZ005671 | Unassigned | Unassigned | Unassigned | 592_0   | Clustered           | 16 VC_592_0  | 16  | 0.7259 | 1          | 0.7259 | 0 | 0 | 0 | 1      | Ref |
| MZ005672 | Unassigned | Unassigned | Unassigned | 834_0   | Clustered           | 18 VC_834_0  | 18  | 0.9116 | 1          | 0.9116 | 0 | 0 | 0 | 1      | Ref |
| MZ005673 | Unassigned | Unassigned | Unassigned | 535_1   | Clustered           | 108 VC_535_1 | 108 | 0.8479 | 1          | 0.8479 | 0 | 0 | 0 | 0.9955 | Ref |
| MZ005674 | Unassigned | Unassigned | Unassigned | 243_0   | Clustered           | 72 VC_243_0  | 72  | 0.8089 | 1          | 0.8089 | 0 | 0 | 0 | 1      | Ref |
| MZ005675 | Unassigned | Unassigned | Unassigned | 898_1   | Clustered           | 27 VC_898_1  | 27  | 0.8894 | 1          | 0.8894 | 0 | 0 | 0 | 1      | Ref |
| MZ005676 | Unassigned | Unassigned | Unassigned | 1407_0  | Clustered           | 78 VC_1407_0 | 78  | 0.9731 | 1          | 0.9731 | 0 | 0 | 0 | 1      | Ref |
| MZ005677 | Unassigned | Unassigned | Unassigned | 989_0   | Clustered           | 13 VC_989_0  | 13  | 0.8622 | 1          | 0.8622 | 0 | 0 | 0 | 1      | Ref |
| MZ005678 | Unassigned | Unassigned | Unassigned | 1407_0  | Clustered           | 78 VC_1407_0 | 78  | 0.9731 | 1          | 0.9731 | 0 | 0 | 0 | 1      | Ref |
| MZ005680 | Unassigned | Unassigned | Unassigned | 1219_0  | Clustered           | 24 VC_1219_0 | 24  | 0.9519 | 1          | 0.9519 | 0 | 0 | 0 | 1      | Ref |
| MZ005682 | Unassigned | Unassigned | Unassigned | 1250_0  | Clustered           | 29 VC_1250_0 | 29  | 0.822  | 1          | 0.822  | 0 | 0 | 0 | 1      | Ref |
| MZ005683 | Unassigned | Unassigned | Unassigned | 898_1   | Clustered           | 27 VC_898_1  | 27  | 0.8894 | 1          | 0.8894 | 0 | 0 | 0 | 1      | Ref |
| MZ005684 | Unassigned | Unassigned | Unassigned | 1296_0  | Clustered           | 82 VC_1296_0 | 82  | 0.7938 | 1          | 0.7938 | 0 | 0 | 0 | 1      | Ref |
| MZ005685 | Unassigned | Unassigned | Unassigned | 230_0   | Clustered           | 38 VC_230_0  | 38  | 0.9076 | 1          | 0.9076 | 0 | 0 | 0 | 1      | Ref |
| MZ020222 | Unassigned | Unassigned | Unassigned | 861_0   | Clustered           | 29 VC_861_0  | 29  | 0.9954 | 1          | 0.9954 | 0 | 0 | 0 | 1      | Ref |
| MZ028625 | Unassigned | Unassigned | Unassigned | 231_0   | Clustered           | 19 VC_231_0  | 19  | 0.9378 | 1          | 0.9378 | 0 | 0 | 0 | 1      | Ref |
| MZ028626 | Unassigned | Unassigned | Unassigned | 579_20  | Clustered           | 17 VC_579_20 | 17  | 0.0538 | 1          | 0.0538 | 0 | 0 | 0 | 0.9926 | Ref |
| MZ028628 | Unassigned | Unassigned | Unassigned | 1407_0  | Clustered           | 78 VC_1407_0 | 78  | 0.9731 | 1          | 0.9731 | 0 | 0 | 0 | 1      | Ref |
| MZ031013 | Unassigned | Unassigned | Unassigned | 466_0   | Clustered           | 66 VC_466_0  | 66  | 0.9246 | 1          | 0.9246 | 0 | 0 | 0 | 1      | Ref |
| MZ042490 | Unassigned | Unassigned | Unassigned | 524_0   | Clustered           | 8 VC_524_0   | 8   | 0.7365 | 1          | 0.7365 | 0 | 0 | 0 | 1      | Ref |
| MZ043613 | Unassigned | Unassigned | Unassigned | 716_1   | Clustered           | 2 VC_716_1   | 2   | 0.1291 | 0.95114164 | 0.1227 | 0 | 0 | 0 | 1      | Ref |
| MZ043897 | Unassigned | Unassigned | Unassigned | 32_1    | Clustered           | 16 VC_32_1   | 16  | 0.1962 | 1          | 0.1962 | 0 | 0 | 0 | 0.8333 | Ref |
| MZ047271 | Unassigned | Unassigned | Unassigned | 350_0   | Clustered           | 2 VC_350_0   | 2   | 0.5215 | 0.85557782 | 0.4462 | 0 | 0 | 0 | 1      | Ref |
| MZ065353 | Unassigned | Unassigned | Unassigned | 290_150 | Clustered/Singleton | 1 VC_290_150 | 1   | 0      | 1          | 0      | 0 | 0 | 0 | 1      | Ref |
| MZ078141 | Unassigned | Unassigned | Unassigned | 1215_0  | Clustered           | 4 VC_1215_0  | 4   | 1      | 1          | 1      | 0 | 0 | 0 | 1      | Ref |
| MZ079855 | Unassigned | Unassigned | Unassigned | 200_1   | Clustered/Singleton | 1 VC_200_1   | 1   | 0      | 1          | 0      | 0 | 0 | 0 | 1      | Ref |
| MZ089728 | Unassigned | Unassigned | Unassigned | 304_0   | Clustered           | 5 VC_304_0   | 5   | 0.1053 | 0.99999993 | 0.1053 | 0 | 0 | 0 | 0.9    | Ref |



|          |            |            |            |         |                     |               |     |        |            |        |   |   |   |        |       |
|----------|------------|------------|------------|---------|---------------------|---------------|-----|--------|------------|--------|---|---|---|--------|-------|
| MZ089729 | Unassigned | Unassigned | Unassigned | 81_0    | Clustered           | 41 VC_81_0    | 41  | 0.5815 | 1          | 0.5815 | 0 | 0 | 0 | 0.9805 | Ref   |
| MZ089731 | Unassigned | Unassigned | Unassigned | 772_0   | Clustered           | 9 VC_772_0    | 9   | 0.4468 | 1          | 0.4468 | 0 | 0 | 0 |        | 1 Ref |
| MZ089732 | Unassigned | Unassigned | Unassigned | 486_0   | Clustered           | 47 VC_486_0   | 47  | 0.9022 | 1          | 0.9022 | 0 | 0 | 0 |        | 1 Ref |
| MZ089733 | Unassigned | Unassigned | Unassigned | 486_0   | Clustered           | 47 VC_486_0   | 47  | 0.9022 | 1          | 0.9022 | 0 | 0 | 0 |        | 1 Ref |
| MZ089734 | Unassigned | Unassigned | Unassigned | 172_0   | Clustered           | 26 VC_172_0   | 26  | 0.7909 | 1          | 0.7909 | 0 | 0 | 0 |        | 1 Ref |
| MZ089738 | Unassigned | Unassigned | Unassigned | 486_0   | Clustered           | 47 VC_486_0   | 47  | 0.9022 | 1          | 0.9022 | 0 | 0 | 0 |        | 1 Ref |
| MZ089739 | Unassigned | Unassigned | Unassigned | 486_0   | Clustered           | 47 VC_486_0   | 47  | 0.9022 | 1          | 0.9022 | 0 | 0 | 0 |        | 1 Ref |
| MZ089740 | Unassigned | Unassigned | Unassigned | 486_0   | Clustered           | 47 VC_486_0   | 47  | 0.9022 | 1          | 0.9022 | 0 | 0 | 0 |        | 1 Ref |
| MZ089741 | Unassigned | Unassigned | Unassigned | 172_0   | Clustered           | 26 VC_172_0   | 26  | 0.7909 | 1          | 0.7909 | 0 | 0 | 0 |        | 1 Ref |
| MZ089742 | Unassigned | Unassigned | Unassigned | 486_0   | Clustered           | 47 VC_486_0   | 47  | 0.9022 | 1          | 0.9022 | 0 | 0 | 0 |        | 1 Ref |
| MZ089747 | Unassigned | Unassigned | Unassigned | 1530_0  | Clustered           | 2 VC_1530_0   | 2   | 1      | 1          | 1      | 0 | 0 | 0 |        | 1 Ref |
| MZ089748 | Unassigned | Unassigned | Unassigned | 1530_0  | Clustered           | 2 VC_1530_0   | 2   | 1      | 1          | 1      | 0 | 0 | 0 |        | 1 Ref |
| MZ089750 | Unassigned | Unassigned | Unassigned | 1502_0  | Clustered           | 4 VC_1502_0   | 4   | 1      | 1          | 1      | 0 | 0 | 0 |        | 1 Ref |
| MZ089752 | Unassigned | Unassigned | Unassigned | 1119_0  | Clustered           | 48 VC_1119_0  | 48  | 0.852  | 1          | 0.852  | 0 | 0 | 0 |        | 1 Ref |
| MZ089756 | Unassigned | Unassigned | Unassigned | 1161_0  | Clustered           | 16 VC_1161_0  | 16  | 0.4834 | 0.99999958 | 0.4834 | 0 | 0 | 0 |        | 1 Ref |
| MZ089762 | Unassigned | Unassigned | Unassigned | 1383_0  | Clustered/Singleton | 1 VC_1383_0   | 1   | 0      | 1          | 0      | 0 | 0 | 0 |        | 1 Ref |
| MZ089765 | Unassigned | Unassigned | Unassigned | 1145_0  | Clustered           | 164 VC_1145_0 | 164 | 0.8868 | 1          | 0.8868 | 0 | 0 | 0 |        | 1 Ref |
| MZ089767 | Unassigned | Unassigned | Unassigned | 1145_0  | Clustered           | 164 VC_1145_0 | 164 | 0.8868 | 1          | 0.8868 | 0 | 0 | 0 |        | 1 Ref |
| MZ089768 | Unassigned | Unassigned | Unassigned | 1364_0  | Clustered           | 6 VC_1364_0   | 6   | 0.9472 | 0.54366909 | 0.515  | 0 | 0 | 0 |        | 1 Ref |
| MZ089769 | Unassigned | Unassigned | Unassigned | 1531_0  | Clustered           | 2 VC_1531_0   | 2   | 1      | 1          | 1      | 0 | 0 | 0 |        | 1 Ref |
| MZ089770 | Unassigned | Unassigned | Unassigned | 1384_0  | Clustered           | 14 VC_1384_0  | 14  | 0.829  | 1          | 0.829  | 0 | 0 | 0 |        | 1 Ref |
| MZ089771 | Unassigned | Unassigned | Unassigned | 1320_0  | Clustered           | 10 VC_1320_0  | 10  | 0.8478 | 1          | 0.8478 | 0 | 0 | 0 |        | 1 Ref |
| MZ089772 | Unassigned | Unassigned | Unassigned | 1384_0  | Clustered           | 14 VC_1384_0  | 14  | 0.829  | 1          | 0.829  | 0 | 0 | 0 |        | 1 Ref |
| MZ089773 | Unassigned | Unassigned | Unassigned | 1161_0  | Clustered           | 16 VC_1161_0  | 16  | 0.4834 | 0.99999958 | 0.4834 | 0 | 0 | 0 |        | 1 Ref |
| MZ089774 | Unassigned | Unassigned | Unassigned | 1145_0  | Clustered           | 164 VC_1145_0 | 164 | 0.8868 | 1          | 0.8868 | 0 | 0 | 0 |        | 1 Ref |
| MZ089775 | Unassigned | Unassigned | Unassigned | 1145_0  | Clustered           | 164 VC_1145_0 | 164 | 0.8868 | 1          | 0.8868 | 0 | 0 | 0 |        | 1 Ref |
| MZ089776 | Unassigned | Unassigned | Unassigned | 1145_0  | Clustered           | 164 VC_1145_0 | 164 | 0.8868 | 1          | 0.8868 | 0 | 0 | 0 |        | 1 Ref |
| MZ089777 | Unassigned | Unassigned | Unassigned | 1176_0  | Clustered           | 6 VC_1176_0   | 6   | 0.1252 | 0.96352059 | 0.1206 | 0 | 0 | 0 |        | 1 Ref |
| MZ089778 | Unassigned | Unassigned | Unassigned | 1174_0  | Clustered           | 4 VC_1174_0   | 4   | 0.1295 | 0.97665214 | 0.1265 | 0 | 0 | 0 |        | 1 Ref |
| MZ089780 | Unassigned | Unassigned | Unassigned | 1384_0  | Clustered           | 14 VC_1384_0  | 14  | 0.829  | 1          | 0.829  | 0 | 0 | 0 |        | 1 Ref |
| MZ089783 | Unassigned | Unassigned | Unassigned | 1532_0  | Clustered           | 2 VC_1532_0   | 2   | 1      | 1          | 1      | 0 | 0 | 0 |        | 1 Ref |
| MZ089786 | Unassigned | Unassigned | Unassigned | 1299_0  | Clustered           | 53 VC_1299_0  | 53  | 0.8666 | 1          | 0.8666 | 0 | 0 | 0 |        | 1 Ref |
| MZ089787 | Unassigned | Unassigned | Unassigned | 1533_0  | Clustered           | 3 VC_1533_0   | 3   | 0.7832 | 0.96173875 | 0.7532 | 0 | 0 | 0 |        | 1 Ref |
| MZ089788 | Unassigned | Unassigned | Unassigned | 1533_0  | Clustered           | 3 VC_1533_0   | 3   | 0.7832 | 0.96173875 | 0.7532 | 0 | 0 | 0 |        | 1 Ref |
| MZ089789 | Unassigned | Unassigned | Unassigned | 1241_0  | Clustered           | 13 VC_1241_0  | 13  | 0.8675 | 0.76044592 | 0.6597 | 0 | 0 | 0 |        | 1 Ref |
| MZ089790 | Unassigned | Unassigned | Unassigned | 1534_0  | Clustered           | 3 VC_1534_0   | 3   | 1      | 1          | 1      | 0 | 0 | 0 |        | 1 Ref |
| MZ089791 | Unassigned | Unassigned | Unassigned | 1299_0  | Clustered           | 53 VC_1299_0  | 53  | 0.8666 | 1          | 0.8666 | 0 | 0 | 0 |        | 1 Ref |
| MZ089792 | Unassigned | Unassigned | Unassigned | 1534_0  | Clustered           | 3 VC_1534_0   | 3   | 1      | 1          | 1      | 0 | 0 | 0 |        | 1 Ref |
| MZ089794 | Unassigned | Unassigned | Unassigned | 1534_0  | Clustered           | 3 VC_1534_0   | 3   | 1      | 1          | 1      | 0 | 0 | 0 |        | 1 Ref |
| MZ089795 | Unassigned | Unassigned | Unassigned | 1299_0  | Clustered           | 53 VC_1299_0  | 53  | 0.8666 | 1          | 0.8666 | 0 | 0 | 0 |        | 1 Ref |
| MZ089798 | Unassigned | Unassigned | Unassigned | 1375_0  | Clustered           | 12 VC_1375_0  | 12  | 0.7378 | 0.86590481 | 0.6389 | 0 | 0 | 0 |        | 1 Ref |
| MZ089799 | Unassigned | Unassigned | Unassigned | 1375_0  | Clustered           | 12 VC_1375_0  | 12  | 0.7378 | 0.86590481 | 0.6389 | 0 | 0 | 0 |        | 1 Ref |
| MZ089800 | Unassigned | Unassigned | Unassigned | 1375_0  | Clustered           | 12 VC_1375_0  | 12  | 0.7378 | 0.86590481 | 0.6389 | 0 | 0 | 0 |        | 1 Ref |
| MZ089801 | Unassigned | Unassigned | Unassigned | 1375_0  | Clustered           | 12 VC_1375_0  | 12  | 0.7378 | 0.86590481 | 0.6389 | 0 | 0 | 0 |        | 1 Ref |
| MZ089802 | Unassigned | Unassigned | Unassigned | 1334_0  | Clustered           | 7 VC_1334_0   | 7   | 0.6918 | 1          | 0.6918 | 0 | 0 | 0 |        | 1 Ref |
| MZ089803 | Unassigned | Unassigned | Unassigned | 1375_0  | Clustered           | 12 VC_1375_0  | 12  | 0.7378 | 0.86590481 | 0.6389 | 0 | 0 | 0 |        | 1 Ref |
| MZ089804 | Unassigned | Unassigned | Unassigned | 1366_0  | Clustered           | 7 VC_1366_0   | 7   | 0.7919 | 0.99999998 | 0.7919 | 0 | 0 | 0 |        | 1 Ref |
| MZ089805 | Unassigned | Unassigned | Unassigned | 1375_0  | Clustered           | 12 VC_1375_0  | 12  | 0.7378 | 0.86590481 | 0.6389 | 0 | 0 | 0 |        | 1 Ref |
| MZ089806 | Unassigned | Unassigned | Unassigned | 1299_0  | Clustered           | 53 VC_1299_0  | 53  | 0.8666 | 1          | 0.8666 | 0 | 0 | 0 |        | 1 Ref |
| MZ089807 | Unassigned | Unassigned | Unassigned | 1366_0  | Clustered           | 7 VC_1366_0   | 7   | 0.7919 | 0.99999998 | 0.7919 | 0 | 0 | 0 |        | 1 Ref |
| MZ089808 | Unassigned | Unassigned | Unassigned | 1336_0  | Clustered/Singleton | 1 VC_1336_0   | 1   | 0      | 1          | 0      | 0 | 0 | 0 |        | 1 Ref |
| MZ089811 | Unassigned | Unassigned | Unassigned | 1535_0  | Clustered           | 4 VC_1535_0   | 4   | 1      | 1          | 1      | 0 | 0 | 0 |        | 1 Ref |
| MZ08978  | Unassigned | Unassigned | Unassigned | 435_0   | Clustered           | 7 VC_435_0    | 7   | 0.9041 | 0.9998143  | 0.9039 | 0 | 0 | 0 |        | 1 Ref |
| MZ08979  | Unassigned | Unassigned | Unassigned | 435_0   | Clustered           | 7 VC_435_0    | 7   | 0.9041 | 0.9998143  | 0.9039 | 0 | 0 | 0 |        | 1 Ref |
| MZ090946 | Unassigned | Unassigned | Unassigned | 258_0   | Clustered           | 121 VC_258_0  | 121 | 0.7359 | 1          | 0.7359 | 0 | 0 | 0 | 0.9999 | Ref   |
| MZ099557 | Unassigned | Unassigned | Unassigned | 714_0   | Clustered           | 71 VC_714_0   | 71  | 0.935  | 1          | 0.935  | 0 | 0 | 0 |        | 1 Ref |
| MZ127825 | Unassigned | Unassigned | Unassigned | 440_0   | Clustered           | 33 VC_440_0   | 33  | 0.992  | 1          | 0.992  | 0 | 0 | 0 |        | 1 Ref |
| MZ147816 | Unassigned | Unassigned | Unassigned | 94_0    | Clustered           | 22 VC_94_0    | 22  | 0.5602 | 1          | 0.5602 | 0 | 0 | 0 |        | 1 Ref |
| MZ150757 | Unassigned | Unassigned | Unassigned | 290_176 | Clustered/Singleton | 1 VC_290_176  | 1   | 0      | 1          | 0      | 0 | 0 | 0 |        | 1 Ref |
| MZ150758 | Unassigned | Unassigned | Unassigned | 340_11  | Clustered           | 15 VC_340_11  | 15  | 0.079  | 1          | 0.079  | 0 | 0 | 0 | 0.9333 | Ref   |
| MZ150782 | Unassigned | Unassigned | Unassigned | 1202_0  | Clustered           | 10 VC_1202_0  | 10  | 0.5679 | 1          | 0.5679 | 0 | 0 | 0 |        | 1 Ref |
| MZ150783 | Unassigned | Unassigned | Unassigned | 1143_0  | Clustered           | 2 VC_1143_0   | 2   | 0.1263 | 0.94673154 | 0.1196 | 0 | 0 | 0 |        | 1 Ref |
| MZ150784 | Unassigned | Unassigned | Unassigned | 1076_0  | Clustered           | 6 VC_1076_0   | 6   | 0.6773 | 1          | 0.6773 | 0 | 0 | 0 |        | 1 Ref |
| MZ150785 | Unassigned | Unassigned | Unassigned | 1217_0  | Clustered           | 41 VC_1217_0  | 41  | 0.9546 | 1          | 0.9546 | 0 | 0 | 0 | 0.9976 | Ref   |
| MZ150786 | Unassigned | Unassigned | Unassigned | 385_4   | Clustered           | 3 VC_385_4    | 3   | 0.0329 | 0.99853257 | 0.0329 | 0 | 0 | 0 |        | 1 Ref |
| MZ150788 | Unassigned | Unassigned | Unassigned | 1216_0  | Clustered           | 22 VC_1216_0  | 22  | 0.4546 | 1          | 0.4546 | 0 | 0 | 0 |        | 1 Ref |
| MZ150790 | Unassigned | Unassigned | Unassigned | 1510_0  | Clustered           | 4 VC_1510_0   | 4   | 1      | 1          | 1      | 0 | 0 | 0 |        | 1 Ref |
| MZ150791 | Unassigned | Unassigned | Unassigned | 1219_0  | Clustered           | 24 VC_1219_0  | 24  | 0.9519 | 1          | 0.9519 | 0 | 0 | 0 |        | 1 Ref |
| MZ150792 | Unassigned | Unassigned | Unassigned | 1415_0  | Clustered           | 31 VC_1415_0  | 31  | 0.8456 | 1          | 0.8456 | 0 | 0 | 0 |        | 1 Ref |
| MZ150793 | Unassigned | Unassigned | Unassigned | 952_0   | Clustered           | 39 VC_952_0   | 39  | 0.9064 | 1          | 0.9064 | 0 | 0 | 0 |        | 1 Ref |
| MZ152914 | Unassigned | Unassigned | Unassigned | 594_0   | Clustered           | 7 VC_594_0    | 7   | 0.2725 | 1          | 0.2725 | 0 | 0 | 0 |        | 1 Ref |
| MZ156567 | Unassigned | Unassigned | Unassigned | 654_0   | Clustered           | 115 VC_654_0  | 115 | 0.7303 | 1          | 0.7303 | 0 | 0 | 0 | 0.8764 | Ref   |
| MZ156568 | Unassigned | Unassigned | Unassigned | 654_0   | Clustered           | 115 VC_654_0  | 115 | 0.7303 | 1          | 0.7303 | 0 | 0 | 0 | 0.8764 | Ref   |
| MZ156569 | Unassigned | Unassigned | Unassigned | 654_0   | Clustered           | 115 VC_654_0  | 115 | 0.7303 | 1          | 0.7303 | 0 | 0 | 0 | 0.8764 | Ref   |
| MZ156570 | Unassigned | Unassigned | Unassigned | 135_35  | Clustered/Singleton | 1 VC_135_35   | 1   | 0      | 1          | 0      | 0 | 0 | 0 |        | 1 Ref |
| MZ170040 | Unassigned | Unassigned | Unassigned | 290_75  | Clustered/Singleton | 1 VC_290_75   | 1   | 0      | 1          | 0      | 0 | 0 | 0 |        | 1 Ref |
| MZ170041 | Unassigned | Unassigned | Unassigned | 290_77  | Clustered           | 2 VC_290_77   | 2   | 0.0024 | 0.95149584 | 0.0023 | 0 | 0 | 0 |        | 1 Ref |
| MZ171370 | Unassigned | Unassigned | Unassigned | 898_1   | Clustered           | 27 VC_898_1   | 27  | 0.8894 | 1          | 0.8894 | 0 | 0 | 0 |        | 1 Ref |
| MZ171371 | Unassigned | Unassigned | Unassigned | 1216_0  | Clustered           | 22 VC_1216_0  | 22  | 0.4546 | 1          | 0.4546 | 0 | 0 | 0 |        | 1 Ref |
| MZ171372 | Unassigned | Unassigned | Unassigned | 590_0   | Clustered           | 9 VC_590_0    | 9   | 0.4952 | 1          | 0.4952 | 0 | 0 | 0 |        | 1 Ref |
| MZ171373 | Unassigned | Unassigned | Unassigned | 917_0   | Clustered           | 28 VC_917_0   | 28  | 0.5465 | 1          | 0.5465 | 0 | 0 | 0 |        | 1 Ref |



|          |            |            |            |         |                     |              |     |        |            |        |   |   |   |            |
|----------|------------|------------|------------|---------|---------------------|--------------|-----|--------|------------|--------|---|---|---|------------|
| MZ171374 | Unassigned | Unassigned | Unassigned | 543_0   | Clustered           | 25 VC_543_0  | 25  | 0.4584 | 1          | 0.4584 | 0 | 0 | 0 | 1 Ref      |
| MZ171375 | Unassigned | Unassigned | Unassigned | 527_0   | Clustered           | 37 VC_527_0  | 37  | 0.9679 | 1          | 0.9679 | 0 | 0 | 0 | 1 Ref      |
| MZ171376 | Unassigned | Unassigned | Unassigned | 230_0   | Clustered           | 38 VC_230_0  | 38  | 0.9076 | 1          | 0.9076 | 0 | 0 | 0 | 1 Ref      |
| MZ171377 | Unassigned | Unassigned | Unassigned | 783_0   | Clustered           | 67 VC_783_0  | 67  | 0.8945 | 1          | 0.8945 | 0 | 0 | 0 | 1 Ref      |
| MZ171378 | Unassigned | Unassigned | Unassigned | 538_48  | Clustered/Singleton | 1 VC_538_48  | 1   | 0      | 1          | 0      | 0 | 0 | 0 | 1 Ref      |
| MZ171380 | Unassigned | Unassigned | Unassigned | 535_1   | Clustered           | 108 VC_535_1 | 108 | 0.8479 | 1          | 0.8479 | 0 | 0 | 0 | 0.9955 Ref |
| MZ171381 | Unassigned | Unassigned | Unassigned | 527_0   | Clustered           | 37 VC_527_0  | 37  | 0.9679 | 1          | 0.9679 | 0 | 0 | 0 | 1 Ref      |
| MZ172460 | Unassigned | Unassigned | Unassigned | 972_0   | Clustered           | 99 VC_972_0  | 99  | 0.9113 | 1          | 0.9113 | 0 | 0 | 0 | 0.9928 Ref |
| MZ182246 | Unassigned | Unassigned | Unassigned | 711_0   | Clustered           | 48 VC_711_0  | 48  | 0.8217 | 1          | 0.8217 | 0 | 0 | 0 | 1 Ref      |
| MZ182247 | Unassigned | Unassigned | Unassigned | 861_0   | Clustered           | 29 VC_861_0  | 29  | 0.9954 | 1          | 0.9954 | 0 | 0 | 0 | 1 Ref      |
| MZ188976 | Unassigned | Unassigned | Unassigned | 254_0   | Clustered           | 14 VC_254_0  | 14  | 0.9118 | 1          | 0.9118 | 0 | 0 | 0 | 0.967 Ref  |
| MZ189261 | Unassigned | Unassigned | Unassigned | 293_12  | Clustered           | 3 VC_293_12  | 3   | 0.0146 | 0.92328265 | 0.0135 | 0 | 0 | 0 | 1 Ref      |
| MZ189262 | Unassigned | Unassigned | Unassigned | 290_166 | Clustered/Singleton | 1 VC_290_166 | 1   | 0      | 1          | 0      | 0 | 0 | 0 | 1 Ref      |
| MZ208805 | Unassigned | Unassigned | Unassigned | 113_0   | Clustered           | 91 VC_113_0  | 91  | 0.9584 | 1          | 0.9584 | 0 | 0 | 0 | 1 Ref      |
| MZ209299 | Unassigned | Unassigned | Unassigned | 538_91  | Clustered/Singleton | 1 VC_538_91  | 1   | 0      | 1          | 0      | 0 | 0 | 0 | 1 Ref      |
| MZ209300 | Unassigned | Unassigned | Unassigned | 825_0   | Clustered           | 17 VC_825_0  | 17  | 0.8364 | 1          | 0.8364 | 0 | 0 | 0 | 1 Ref      |
| MZ209301 | Unassigned | Unassigned | Unassigned | 898_1   | Clustered           | 27 VC_898_1  | 27  | 0.8894 | 1          | 0.8894 | 0 | 0 | 0 | 1 Ref      |
| MZ209302 | Unassigned | Unassigned | Unassigned | 1222_0  | Clustered           | 3 VC_1222_0  | 3   | 0.5104 | 0.99818726 | 0.5095 | 0 | 0 | 0 | 1 Ref      |
| MZ209303 | Unassigned | Unassigned | Unassigned | 1204_0  | Clustered           | 25 VC_1204_0 | 25  | 0.7382 | 1          | 0.7382 | 0 | 0 | 0 | 1 Ref      |
| MZ209304 | Unassigned | Unassigned | Unassigned | 1407_0  | Clustered           | 78 VC_1407_0 | 78  | 0.9731 | 1          | 0.9731 | 0 | 0 | 0 | 1 Ref      |
| MZ209305 | Unassigned | Unassigned | Unassigned | 223_5   | Clustered           | 2 VC_223_5   | 2   | 0.0094 | 0.95747812 | 0.009  | 0 | 0 | 0 | 1 Ref      |
| MZ209306 | Unassigned | Unassigned | Unassigned | 577_0   | Clustered           | 21 VC_577_0  | 21  | 0.9908 | 1          | 0.9908 | 0 | 0 | 0 | 1 Ref      |
| MZ209307 | Unassigned | Unassigned | Unassigned | 825_0   | Clustered           | 17 VC_825_0  | 17  | 0.8364 | 1          | 0.8364 | 0 | 0 | 0 | 1 Ref      |
| MZ220766 | Unassigned | Unassigned | Unassigned | 405_0   | Clustered           | 126 VC_405_0 | 126 | 0.9614 | 1          | 0.9614 | 0 | 0 | 0 | 1 Ref      |
| MZ221764 | Unassigned | Unassigned | Unassigned | 972_0   | Clustered           | 99 VC_972_0  | 99  | 0.9113 | 1          | 0.9113 | 0 | 0 | 0 | 0.9928 Ref |
| MZ223858 | Unassigned | Unassigned | Unassigned | 465_0   | Clustered           | 80 VC_465_0  | 80  | 0.9988 | 1          | 0.9988 | 0 | 0 | 0 | 1 Ref      |
| MZ230992 | Unassigned | Unassigned | Unassigned | 1423_0  | Clustered           | 11 VC_1423_0 | 11  | 1      | 0          | 0      | 0 | 0 | 0 | 1 Ref      |
| MZ230993 | Unassigned | Unassigned | Unassigned | 1423_0  | Clustered           | 11 VC_1423_0 | 11  | 1      | 0          | 0      | 0 | 0 | 0 | 1 Ref      |
| MZ230994 | Unassigned | Unassigned | Unassigned | 1423_0  | Clustered           | 11 VC_1423_0 | 11  | 1      | 0          | 0      | 0 | 0 | 0 | 1 Ref      |
| MZ230995 | Unassigned | Unassigned | Unassigned | 1423_0  | Clustered           | 11 VC_1423_0 | 11  | 1      | 0          | 0      | 0 | 0 | 0 | 1 Ref      |
| MZ230996 | Unassigned | Unassigned | Unassigned | 1423_0  | Clustered           | 11 VC_1423_0 | 11  | 1      | 0          | 0      | 0 | 0 | 0 | 1 Ref      |
| MZ230997 | Unassigned | Unassigned | Unassigned | 1423_0  | Clustered           | 11 VC_1423_0 | 11  | 1      | 0          | 0      | 0 | 0 | 0 | 1 Ref      |
| MZ230998 | Unassigned | Unassigned | Unassigned | 1423_0  | Clustered           | 11 VC_1423_0 | 11  | 1      | 0          | 0      | 0 | 0 | 0 | 1 Ref      |
| MZ230999 | Unassigned | Unassigned | Unassigned | 1423_0  | Clustered           | 11 VC_1423_0 | 11  | 1      | 0          | 0      | 0 | 0 | 0 | 1 Ref      |
| MZ231000 | Unassigned | Unassigned | Unassigned | 1423_0  | Clustered           | 11 VC_1423_0 | 11  | 1      | 0          | 0      | 0 | 0 | 0 | 1 Ref      |
| MZ231001 | Unassigned | Unassigned | Unassigned | 1423_0  | Clustered           | 11 VC_1423_0 | 11  | 1      | 0          | 0      | 0 | 0 | 0 | 1 Ref      |
| MZ234008 | Unassigned | Unassigned | Unassigned | 859_0   | Clustered           | 67 VC_859_0  | 67  | 0.9622 | 1          | 0.9622 | 0 | 0 | 0 | 1 Ref      |
| MZ234009 | Unassigned | Unassigned | Unassigned | 465_0   | Clustered           | 80 VC_465_0  | 80  | 0.9988 | 1          | 0.9988 | 0 | 0 | 0 | 1 Ref      |
| MZ234010 | Unassigned | Unassigned | Unassigned | 655_0   | Clustered           | 45 VC_655_0  | 45  | 0.7722 | 1          | 0.7722 | 0 | 0 | 0 | 1 Ref      |
| MZ234011 | Unassigned | Unassigned | Unassigned | 465_0   | Clustered           | 80 VC_465_0  | 80  | 0.9988 | 1          | 0.9988 | 0 | 0 | 0 | 1 Ref      |
| MZ234012 | Unassigned | Unassigned | Unassigned | 466_0   | Clustered           | 66 VC_466_0  | 66  | 0.9246 | 1          | 0.9246 | 0 | 0 | 0 | 1 Ref      |
| MZ234013 | Unassigned | Unassigned | Unassigned | 290_105 | Clustered/Singleton | 1 VC_290_105 | 1   | 0      | 1          | 0      | 0 | 0 | 0 | 1 Ref      |
| MZ234014 | Unassigned | Unassigned | Unassigned | 859_0   | Clustered           | 67 VC_859_0  | 67  | 0.9622 | 1          | 0.9622 | 0 | 0 | 0 | 1 Ref      |
| MZ234015 | Unassigned | Unassigned | Unassigned | 837_0   | Clustered           | 12 VC_837_0  | 12  | 0.2327 | 1          | 0.2327 | 0 | 0 | 0 | 1 Ref      |
| MZ234016 | Unassigned | Unassigned | Unassigned | 859_0   | Clustered           | 67 VC_859_0  | 67  | 0.9622 | 1          | 0.9622 | 0 | 0 | 0 | 1 Ref      |
| MZ234017 | Unassigned | Unassigned | Unassigned | 837_0   | Clustered           | 12 VC_837_0  | 12  | 0.2327 | 1          | 0.2327 | 0 | 0 | 0 | 1 Ref      |
| MZ234018 | Unassigned | Unassigned | Unassigned | 290_40  | Clustered/Singleton | 1 VC_290_40  | 1   | 0      | 1          | 0      | 0 | 0 | 0 | 1 Ref      |
| MZ234019 | Unassigned | Unassigned | Unassigned | 466_0   | Clustered           | 66 VC_466_0  | 66  | 0.9246 | 1          | 0.9246 | 0 | 0 | 0 | 1 Ref      |
| MZ234020 | Unassigned | Unassigned | Unassigned | 466_0   | Clustered           | 66 VC_466_0  | 66  | 0.9246 | 1          | 0.9246 | 0 | 0 | 0 | 1 Ref      |
| MZ234021 | Unassigned | Unassigned | Unassigned | 465_0   | Clustered           | 80 VC_465_0  | 80  | 0.9988 | 1          | 0.9988 | 0 | 0 | 0 | 1 Ref      |
| MZ234022 | Unassigned | Unassigned | Unassigned | 465_0   | Clustered           | 80 VC_465_0  | 80  | 0.9988 | 1          | 0.9988 | 0 | 0 | 0 | 1 Ref      |
| MZ234023 | Unassigned | Unassigned | Unassigned | 465_0   | Clustered           | 80 VC_465_0  | 80  | 0.9988 | 1          | 0.9988 | 0 | 0 | 0 | 1 Ref      |
| MZ234024 | Unassigned | Unassigned | Unassigned | 465_0   | Clustered           | 80 VC_465_0  | 80  | 0.9988 | 1          | 0.9988 | 0 | 0 | 0 | 1 Ref      |
| MZ234025 | Unassigned | Unassigned | Unassigned | 293_1   | Clustered           | 21 VC_293_1  | 21  | 0.1694 | 1          | 0.1694 | 0 | 0 | 0 | 0.9048 Ref |
| MZ234026 | Unassigned | Unassigned | Unassigned | 859_0   | Clustered           | 67 VC_859_0  | 67  | 0.9622 | 1          | 0.9622 | 0 | 0 | 0 | 1 Ref      |
| MZ234027 | Unassigned | Unassigned | Unassigned | 290_78  | Clustered           | 13 VC_290_78 | 13  | 0.0346 | 1          | 0.0346 | 0 | 0 | 0 | 0.7949 Ref |
| MZ234028 | Unassigned | Unassigned | Unassigned | 837_1   | Clustered           | 24 VC_837_1  | 24  | 0.5328 | 1          | 0.5328 | 0 | 0 | 0 | 1 Ref      |
| MZ234029 | Unassigned | Unassigned | Unassigned | 859_0   | Clustered           | 67 VC_859_0  | 67  | 0.9622 | 1          | 0.9622 | 0 | 0 | 0 | 1 Ref      |
| MZ234030 | Unassigned | Unassigned | Unassigned | 290_78  | Clustered           | 13 VC_290_78 | 13  | 0.0346 | 1          | 0.0346 | 0 | 0 | 0 | 0.7949 Ref |
| MZ234031 | Unassigned | Unassigned | Unassigned | 290_117 | Clustered           | 3 VC_290_117 | 3   | 0.0052 | 0.99730524 | 0.0052 | 0 | 0 | 0 | 1 Ref      |
| MZ234032 | Unassigned | Unassigned | Unassigned | 466_0   | Clustered           | 66 VC_466_0  | 66  | 0.9246 | 1          | 0.9246 | 0 | 0 | 0 | 1 Ref      |
| MZ234033 | Unassigned | Unassigned | Unassigned | 976_0   | Clustered           | 36 VC_976_0  | 36  | 0.7833 | 1          | 0.7833 | 0 | 0 | 0 | 1 Ref      |
| MZ234034 | Unassigned | Unassigned | Unassigned | 290_78  | Clustered           | 13 VC_290_78 | 13  | 0.0346 | 1          | 0.0346 | 0 | 0 | 0 | 0.7949 Ref |
| MZ234035 | Unassigned | Unassigned | Unassigned | 290_117 | Clustered           | 3 VC_290_117 | 3   | 0.0052 | 0.99730524 | 0.0052 | 0 | 0 | 0 | 1 Ref      |
| MZ234036 | Unassigned | Unassigned | Unassigned | 290_78  | Clustered           | 13 VC_290_78 | 13  | 0.0346 | 1          | 0.0346 | 0 | 0 | 0 | 0.7949 Ref |
| MZ234037 | Unassigned | Unassigned | Unassigned | 290_78  | Clustered           | 13 VC_290_78 | 13  | 0.0346 | 1          | 0.0346 | 0 | 0 | 0 | 0.7949 Ref |
| MZ234038 | Unassigned | Unassigned | Unassigned | 290_117 | Clustered           | 3 VC_290_117 | 3   | 0.0052 | 0.99730524 | 0.0052 | 0 | 0 | 0 | 1 Ref      |
| MZ234039 | Unassigned | Unassigned | Unassigned | 290_78  | Clustered           | 13 VC_290_78 | 13  | 0.0346 | 1          | 0.0346 | 0 | 0 | 0 | 0.7949 Ref |
| MZ234040 | Unassigned | Unassigned | Unassigned | 290_78  | Clustered           | 13 VC_290_78 | 13  | 0.0346 | 1          | 0.0346 | 0 | 0 | 0 | 0.7949 Ref |
| MZ234041 | Unassigned | Unassigned | Unassigned | 290_78  | Clustered           | 13 VC_290_78 | 13  | 0.0346 | 1          | 0.0346 | 0 | 0 | 0 | 0.7949 Ref |
| MZ234042 | Unassigned | Unassigned | Unassigned | 290_78  | Clustered           | 13 VC_290_78 | 13  | 0.0346 | 1          | 0.0346 | 0 | 0 | 0 | 0.7949 Ref |
| MZ234043 | Unassigned | Unassigned | Unassigned | 290_78  | Clustered           | 13 VC_290_78 | 13  | 0.0346 | 1          | 0.0346 | 0 | 0 | 0 | 0.7949 Ref |
| MZ234044 | Unassigned | Unassigned | Unassigned | 465_0   | Clustered           | 80 VC_465_0  | 80  | 0.9988 | 1          | 0.9988 | 0 | 0 | 0 | 1 Ref      |
| MZ234045 | Unassigned | Unassigned | Unassigned | 465_0   | Clustered           | 80 VC_465_0  | 80  | 0.9988 | 1          | 0.9988 | 0 | 0 | 0 | 1 Ref      |
| MZ234046 | Unassigned | Unassigned | Unassigned | 465_0   | Clustered           | 80 VC_465_0  | 80  | 0.9988 | 1          | 0.9988 | 0 | 0 | 0 | 1 Ref      |
| MZ234047 | Unassigned | Unassigned | Unassigned | 465_0   | Clustered           | 80 VC_465_0  | 80  | 0.9988 | 1          | 0.9988 | 0 | 0 | 0 | 1 Ref      |
| MZ234048 | Unassigned | Unassigned | Unassigned | 655_0   | Clustered           | 45 VC_655_0  | 45  | 0.7722 | 1          | 0.7722 | 0 | 0 | 0 | 1 Ref      |
| MZ234049 | Unassigned | Unassigned | Unassigned | 466_0   | Clustered           | 66 VC_466_0  | 66  | 0.9246 | 1          | 0.9246 | 0 | 0 | 0 | 1 Ref      |
| MZ234050 | Unassigned | Unassigned | Unassigned | 466_0   | Clustered           | 66 VC_466_0  | 66  | 0.9246 | 1          | 0.9246 | 0 | 0 | 0 | 1 Ref      |
| MZ234051 | Unassigned | Unassigned | Unassigned | 290_78  | Clustered           | 13 VC_290_78 | 13  | 0.0346 | 1          | 0.0346 | 0 | 0 | 0 | 0.7949 Ref |
| MZ234052 | Unassigned | Unassigned | Unassigned | 290_78  | Clustered           | 13 VC_290_78 | 13  | 0.0346 | 1          | 0.0346 | 0 | 0 | 0 | 0.7949 Ref |



|          |            |            |            |        |                     |              |     |        |            |        |   |   |   |        |     |
|----------|------------|------------|------------|--------|---------------------|--------------|-----|--------|------------|--------|---|---|---|--------|-----|
| MZ234053 | Unassigned | Unassigned | Unassigned | 290_78 | Clustered           | 13 VC_290_78 | 13  | 0.0346 | 1          | 0.0346 | 0 | 0 | 0 | 0.7949 | Ref |
| MZ272341 | Unassigned | Unassigned | Unassigned | 711_0  | Clustered           | 48 VC_711_0  | 48  | 0.8217 | 1          | 0.8217 | 0 | 0 | 0 | 1      | Ref |
| MZ274225 | Unassigned | Unassigned | Unassigned | 654_0  | Clustered           | 115 VC_654_0 | 115 | 0.7303 | 1          | 0.7303 | 0 | 0 | 0 | 0.8764 | Ref |
| MZ274304 | Unassigned | Unassigned | Unassigned | 543_0  | Clustered           | 25 VC_543_0  | 25  | 0.4584 | 1          | 0.4584 | 0 | 0 | 0 | 1      | Ref |
| MZ274305 | Unassigned | Unassigned | Unassigned | 571_2  | Clustered           | 17 VC_571_2  | 17  | 0.0965 | 1          | 0.0965 | 0 | 0 | 0 | 0.9779 | Ref |
| MZ274306 | Unassigned | Unassigned | Unassigned | 538_46 | Clustered/Singleton | 1 VC_538_46  | 1   | 0      | 1          | 0      | 0 | 0 | 0 | 1      | Ref |
| MZ274307 | Unassigned | Unassigned | Unassigned | 1407_0 | Clustered           | 78 VC_1407_0 | 78  | 0.9731 | 1          | 0.9731 | 0 | 0 | 0 | 1      | Ref |
| MZ274308 | Unassigned | Unassigned | Unassigned | 1076_0 | Clustered           | 6 VC_1076_0  | 6   | 0.6773 | 1          | 0.6773 | 0 | 0 | 0 | 1      | Ref |
| MZ274309 | Unassigned | Unassigned | Unassigned | 1204_0 | Clustered           | 25 VC_1204_0 | 25  | 0.7382 | 1          | 0.7382 | 0 | 0 | 0 | 1      | Ref |
| MZ285878 | Unassigned | Unassigned | Unassigned | 80_7   | Clustered           | 33 VC_80_7   | 33  | 0.2156 | 1          | 0.2156 | 0 | 0 | 0 | 0.8409 | Ref |
| MZ285879 | Unassigned | Unassigned | Unassigned | 645_0  | Clustered           | 20 VC_645_0  | 20  | 0.8502 | 1          | 0.8502 | 0 | 0 | 0 | 1      | Ref |
| MZ286294 | Unassigned | Unassigned | Unassigned | 209_0  | Clustered           | 3 VC_209_0   | 3   | 0.0996 | 0.69690761 | 0.0694 | 0 | 0 | 0 | 1      | Ref |
| MZ291552 | Unassigned | Unassigned | Unassigned | 290_4  | Clustered           | 5 VC_290_4   | 5   | 0.0111 | 0.99999967 | 0.0111 | 0 | 0 | 0 | 1      | Ref |
| MZ292654 | Unassigned | Unassigned | Unassigned | 513_0  | Clustered           | 39 VC_513_0  | 39  | 0.3078 | 1          | 0.3078 | 0 | 0 | 0 | 1      | Ref |
| MZ308445 | Unassigned | Unassigned | Unassigned | 267_0  | Clustered/Singleton | 1 VC_267_0   | 1   | 0      | 1          | 0      | 0 | 0 | 0 | 1      | Ref |
| MZ311861 | Unassigned | Unassigned | Unassigned | 465_0  | Clustered           | 80 VC_465_0  | 80  | 0.9988 | 1          | 0.9988 | 0 | 0 | 0 | 1      | Ref |
| MZ311862 | Unassigned | Unassigned | Unassigned | 465_0  | Clustered           | 80 VC_465_0  | 80  | 0.9988 | 1          | 0.9988 | 0 | 0 | 0 | 1      | Ref |
| MZ311863 | Unassigned | Unassigned | Unassigned | 340_22 | Clustered           | 5 VC_340_22  | 5   | 0.0219 | 0.99999994 | 0.0219 | 0 | 0 | 0 | 1      | Ref |
| MZ311864 | Unassigned | Unassigned | Unassigned | 601_4  | Clustered           | 3 VC_601_4   | 3   | 0.0346 | 0.98052968 | 0.034  | 0 | 0 | 0 | 1      | Ref |
| MZ311865 | Unassigned | Unassigned | Unassigned | 293_13 | Clustered           | 10 VC_293_13 | 10  | 0.0698 | 0.99999931 | 0.0698 | 0 | 0 | 0 | 0.9556 | Ref |
| MZ318361 | Unassigned | Unassigned | Unassigned | 405_0  | Clustered           | 126 VC_405_0 | 126 | 0.9614 | 1          | 0.9614 | 0 | 0 | 0 | 1      | Ref |
| MZ318362 | Unassigned | Unassigned | Unassigned | 405_0  | Clustered           | 126 VC_405_0 | 126 | 0.9614 | 1          | 0.9614 | 0 | 0 | 0 | 1      | Ref |
| MZ318363 | Unassigned | Unassigned | Unassigned | 405_0  | Clustered           | 126 VC_405_0 | 126 | 0.9614 | 1          | 0.9614 | 0 | 0 | 0 | 1      | Ref |
| MZ318367 | Unassigned | Unassigned | Unassigned | 474_0  | Clustered           | 19 VC_474_0  | 19  | 0.3729 | 1          | 0.3729 | 0 | 0 | 0 | 1      | Ref |
| MZ322004 | Unassigned | Unassigned | Unassigned | 335_49 | Clustered           | 17 VC_335_49 | 17  | 0.0731 | 1          | 0.0731 | 0 | 0 | 0 | 0.7721 | Ref |
| MZ322006 | Unassigned | Unassigned | Unassigned | 1407_0 | Clustered           | 78 VC_1407_0 | 78  | 0.9731 | 1          | 0.9731 | 0 | 0 | 0 | 1      | Ref |
| MZ322007 | Unassigned | Unassigned | Unassigned | 230_0  | Clustered           | 38 VC_230_0  | 38  | 0.9076 | 1          | 0.9076 | 0 | 0 | 0 | 1      | Ref |
| MZ322008 | Unassigned | Unassigned | Unassigned | 1407_0 | Clustered           | 78 VC_1407_0 | 78  | 0.9731 | 1          | 0.9731 | 0 | 0 | 0 | 1      | Ref |
| MZ322009 | Unassigned | Unassigned | Unassigned | 1138_0 | Clustered           | 16 VC_1138_0 | 16  | 0.4566 | 1          | 0.4566 | 0 | 0 | 0 | 1      | Ref |
| MZ322010 | Unassigned | Unassigned | Unassigned | 789_0  | Clustered           | 34 VC_789_0  | 34  | 0.9167 | 1          | 0.9167 | 0 | 0 | 0 | 1      | Ref |
| MZ322011 | Unassigned | Unassigned | Unassigned | 1212_0 | Clustered           | 21 VC_1212_0 | 21  | 0.711  | 1          | 0.711  | 0 | 0 | 0 | 1      | Ref |
| MZ322012 | Unassigned | Unassigned | Unassigned | 1287_0 | Clustered           | 44 VC_1287_0 | 44  | 1      | 1          | 1      | 0 | 0 | 0 | 1      | Ref |
| MZ322013 | Unassigned | Unassigned | Unassigned | 952_0  | Clustered           | 39 VC_952_0  | 39  | 0.9064 | 1          | 0.9064 | 0 | 0 | 0 | 1      | Ref |
| MZ322014 | Unassigned | Unassigned | Unassigned | 1407_0 | Clustered           | 78 VC_1407_0 | 78  | 0.9731 | 1          | 0.9731 | 0 | 0 | 0 | 1      | Ref |
| MZ322015 | Unassigned | Unassigned | Unassigned | 1136_0 | Clustered           | 40 VC_1136_0 | 40  | 0.8746 | 1          | 0.8746 | 0 | 0 | 0 | 1      | Ref |
| MZ322016 | Unassigned | Unassigned | Unassigned | 245_0  | Clustered           | 17 VC_245_0  | 17  | 0.6081 | 1          | 0.6081 | 0 | 0 | 0 | 1      | Ref |
| MZ322017 | Unassigned | Unassigned | Unassigned | 533_0  | Clustered           | 16 VC_533_0  | 16  | 0.3765 | 1          | 0.3765 | 0 | 0 | 0 | 1      | Ref |
| MZ322018 | Unassigned | Unassigned | Unassigned | 1212_0 | Clustered           | 21 VC_1212_0 | 21  | 0.711  | 1          | 0.711  | 0 | 0 | 0 | 1      | Ref |
| MZ322019 | Unassigned | Unassigned | Unassigned | 223_4  | Clustered           | 13 VC_223_4  | 13  | 0.1649 | 1          | 0.1649 | 0 | 0 | 0 | 1      | Ref |
| MZ322020 | Unassigned | Unassigned | Unassigned | 1138_0 | Clustered           | 16 VC_1138_0 | 16  | 0.4566 | 1          | 0.4566 | 0 | 1 | 0 | 1      | Ref |
| MZ322021 | Unassigned | Unassigned | Unassigned | 990_0  | Clustered           | 3 VC_990_0   | 3   | 0.7715 | 0.99134622 | 0.7648 | 0 | 0 | 0 | 1      | Ref |
| MZ322022 | Unassigned | Unassigned | Unassigned | 789_0  | Clustered           | 34 VC_789_0  | 34  | 0.9167 | 1          | 0.9167 | 0 | 0 | 0 | 1      | Ref |
| MZ322023 | Unassigned | Unassigned | Unassigned | 535_0  | Clustered           | 18 VC_535_0  | 18  | 0.1595 | 1          | 0.1595 | 0 | 0 | 0 | 1      | Ref |
| MZ322024 | Unassigned | Unassigned | Unassigned | 571_7  | Clustered           | 28 VC_571_7  | 28  | 0.1651 | 1          | 0.1651 | 0 | 0 | 0 | 0.8519 | Ref |
| MZ322025 | Unassigned | Unassigned | Unassigned | 535_1  | Clustered           | 108 VC_535_1 | 108 | 0.8479 | 1          | 0.8479 | 0 | 0 | 0 | 0.9955 | Ref |
| MZ322026 | Unassigned | Unassigned | Unassigned | 1415_0 | Clustered           | 31 VC_1415_0 | 31  | 0.8456 | 1          | 0.8456 | 0 | 0 | 0 | 1      | Ref |
| MZ322027 | Unassigned | Unassigned | Unassigned | 1407_0 | Clustered           | 78 VC_1407_0 | 78  | 0.9731 | 1          | 0.9731 | 0 | 0 | 0 | 1      | Ref |
| MZ322028 | Unassigned | Unassigned | Unassigned | 701_0  | Clustered           | 16 VC_701_0  | 16  | 0.2957 | 1          | 0.2957 | 0 | 0 | 0 | 0.9167 | Ref |
| MZ322895 | Unassigned | Unassigned | Unassigned | 686_0  | Clustered           | 25 VC_686_0  | 25  | 0.5501 | 1          | 0.5501 | 0 | 0 | 0 | 0.96   | Ref |
| MZ326168 | Unassigned | Unassigned | Unassigned | 601_5  | Clustered           | 4 VC_601_5   | 4   | 0.0525 | 0.99930943 | 0.0525 | 0 | 0 | 0 | 0.8333 | Ref |
| MZ326855 | Unassigned | Unassigned | Unassigned | 178_0  | Clustered           | 5 VC_178_0   | 5   | 0.3547 | 0.99999997 | 0.3547 | 0 | 0 | 0 | 1      | Ref |
| MZ326856 | Unassigned | Unassigned | Unassigned | 801_3  | Clustered           | 7 VC_801_3   | 7   | 0.0764 | 1          | 0.0764 | 0 | 0 | 0 | 0.7143 | Ref |
| MZ326857 | Unassigned | Unassigned | Unassigned | 801_3  | Clustered           | 7 VC_801_3   | 7   | 0.0764 | 1          | 0.0764 | 0 | 0 | 0 | 0.7143 | Ref |
| MZ326859 | Unassigned | Unassigned | Unassigned | 689_0  | Clustered           | 5 VC_689_0   | 5   | 0.5195 | 0.99999996 | 0.5195 | 0 | 0 | 0 | 1      | Ref |
| MZ326861 | Unassigned | Unassigned | Unassigned | 801_3  | Clustered           | 7 VC_801_3   | 7   | 0.0764 | 1          | 0.0764 | 0 | 0 | 0 | 0.7143 | Ref |
| MZ326862 | Unassigned | Unassigned | Unassigned | 936_0  | Clustered           | 3 VC_936_0   | 3   | 0.3378 | 0.99823775 | 0.3372 | 0 | 0 | 0 | 1      | Ref |
| MZ326863 | Unassigned | Unassigned | Unassigned | 71_0   | Clustered           | 27 VC_71_0   | 27  | 0.5964 | 1          | 0.5964 | 0 | 0 | 0 | 0.9943 | Ref |
| MZ326864 | Unassigned | Unassigned | Unassigned | 634_0  | Clustered           | 2 VC_634_0   | 2   | 0.2597 | 0.94405832 | 0.2451 | 0 | 0 | 0 | 1      | Ref |
| MZ326865 | Unassigned | Unassigned | Unassigned | 711_0  | Clustered           | 48 VC_711_0  | 48  | 0.8217 | 1          | 0.8217 | 0 | 0 | 0 | 1      | Ref |
| MZ326866 | Unassigned | Unassigned | Unassigned | 323_0  | Clustered           | 3 VC_323_0   | 3   | 0.7468 | 0.99821656 | 0.7454 | 0 | 0 | 0 | 1      | Ref |
| MZ326868 | Unassigned | Unassigned | Unassigned | 524_0  | Clustered           | 8 VC_524_0   | 8   | 0.7365 | 1          | 0.7365 | 0 | 0 | 0 | 1      | Ref |
| MZ327261 | Unassigned | Unassigned | Unassigned | 340_1  | Clustered           | 17 VC_340_1  | 17  | 0.0863 | 1          | 0.0863 | 0 | 0 | 0 | 0.8235 | Ref |
| MZ327262 | Unassigned | Unassigned | Unassigned | 340_1  | Clustered           | 17 VC_340_1  | 17  | 0.0863 | 1          | 0.0863 | 0 | 0 | 0 | 0.8235 | Ref |
| MZ333135 | Unassigned | Unassigned | Unassigned | 112_0  | Clustered           | 4 VC_112_0   | 4   | 0.1133 | 0.99998733 | 0.1133 | 0 | 0 | 0 | 1      | Ref |
| MZ333457 | Unassigned | Unassigned | Unassigned | 110_0  | Clustered           | 33 VC_110_0  | 33  | 0.9488 | 1          | 0.9488 | 0 | 0 | 0 | 1      | Ref |
| MZ333461 | Unassigned | Unassigned | Unassigned | 711_0  | Clustered           | 48 VC_711_0  | 48  | 0.8217 | 1          | 0.8217 | 0 | 0 | 0 | 1      | Ref |
| MZ333462 | Unassigned | Unassigned | Unassigned | 94_0   | Clustered           | 22 VC_94_0   | 22  | 0.5602 | 1          | 0.5602 | 0 | 0 | 0 | 1      | Ref |
| MZ334492 | Unassigned | Unassigned | Unassigned | 317_0  | Clustered           | 33 VC_317_0  | 33  | 0.8756 | 1          | 0.8756 | 0 | 0 | 0 | 1      | Ref |
| MZ334493 | Unassigned | Unassigned | Unassigned | 317_0  | Clustered           | 33 VC_317_0  | 33  | 0.8756 | 1          | 0.8756 | 0 | 0 | 0 | 1      | Ref |
| MZ334494 | Unassigned | Unassigned | Unassigned | 317_0  | Clustered           | 33 VC_317_0  | 33  | 0.8756 | 1          | 0.8756 | 0 | 0 | 0 | 1      | Ref |
| MZ334495 | Unassigned | Unassigned | Unassigned | 317_0  | Clustered           | 33 VC_317_0  | 33  | 0.8756 | 1          | 0.8756 | 0 | 0 | 0 | 1      | Ref |
| MZ334496 | Unassigned | Unassigned | Unassigned | 317_0  | Clustered           | 33 VC_317_0  | 33  | 0.8756 | 1          | 0.8756 | 0 | 0 | 0 | 1      | Ref |
| MZ334497 | Unassigned | Unassigned | Unassigned | 317_0  | Clustered           | 33 VC_317_0  | 33  | 0.8756 | 1          | 0.8756 | 0 | 0 | 0 | 1      | Ref |
| MZ334498 | Unassigned | Unassigned | Unassigned | 317_0  | Clustered           | 33 VC_317_0  | 33  | 0.8756 | 1          | 0.8756 | 0 | 0 | 0 | 1      | Ref |
| MZ334499 | Unassigned | Unassigned | Unassigned | 317_0  | Clustered           | 33 VC_317_0  | 33  | 0.8756 | 1          | 0.8756 | 0 | 0 | 0 | 1      | Ref |
| MZ334500 | Unassigned | Unassigned | Unassigned | 317_0  | Clustered           | 33 VC_317_0  | 33  | 0.8756 | 1          | 0.8756 | 0 | 0 | 0 | 1      | Ref |
| MZ334501 | Unassigned | Unassigned | Unassigned | 317_0  | Clustered           | 33 VC_317_0  | 33  | 0.8756 | 1          | 0.8756 | 0 | 0 | 0 | 1      | Ref |
| MZ334502 | Unassigned | Unassigned | Unassigned | 317_0  | Clustered           | 33 VC_317_0  | 33  | 0.8756 | 1          | 0.8756 | 0 | 0 | 0 | 1      | Ref |
| MZ334503 | Unassigned | Unassigned | Unassigned | 317_0  | Clustered           | 33 VC_317_0  | 33  | 0.8756 | 1          | 0.8756 | 0 | 0 | 0 | 1      | Ref |
| MZ334504 | Unassigned | Unassigned | Unassigned | 317_0  | Clustered           | 33 VC_317_0  | 33  | 0.8756 | 1          | 0.8756 | 0 | 0 | 0 | 1      | Ref |
| MZ334505 | Unassigned | Unassigned | Unassigned | 317_0  | Clustered           | 33 VC_317_0  | 33  | 0.8756 | 1          | 0.8756 | 0 | 0 | 0 | 1      | Ref |



|          |            |            |            |        |           |              |     |        |            |        |   |   |   |            |
|----------|------------|------------|------------|--------|-----------|--------------|-----|--------|------------|--------|---|---|---|------------|
| MZ334506 | Unassigned | Unassigned | Unassigned | 317_0  | Clustered | 33 VC_317_0  | 33  | 0.8756 | 1          | 0.8756 | 0 | 0 | 0 | 1 Ref      |
| MZ334507 | Unassigned | Unassigned | Unassigned | 317_0  | Clustered | 33 VC_317_0  | 33  | 0.8756 | 1          | 0.8756 | 0 | 0 | 0 | 1 Ref      |
| MZ334508 | Unassigned | Unassigned | Unassigned | 317_0  | Clustered | 33 VC_317_0  | 33  | 0.8756 | 1          | 0.8756 | 0 | 0 | 0 | 1 Ref      |
| MZ334509 | Unassigned | Unassigned | Unassigned | 317_0  | Clustered | 33 VC_317_0  | 33  | 0.8756 | 1          | 0.8756 | 0 | 0 | 0 | 1 Ref      |
| MZ334510 | Unassigned | Unassigned | Unassigned | 317_0  | Clustered | 33 VC_317_0  | 33  | 0.8756 | 1          | 0.8756 | 0 | 0 | 0 | 1 Ref      |
| MZ334511 | Unassigned | Unassigned | Unassigned | 317_0  | Clustered | 33 VC_317_0  | 33  | 0.8756 | 1          | 0.8756 | 0 | 0 | 0 | 1 Ref      |
| MZ334512 | Unassigned | Unassigned | Unassigned | 317_0  | Clustered | 33 VC_317_0  | 33  | 0.8756 | 1          | 0.8756 | 0 | 0 | 0 | 1 Ref      |
| MZ334513 | Unassigned | Unassigned | Unassigned | 317_0  | Clustered | 33 VC_317_0  | 33  | 0.8756 | 1          | 0.8756 | 0 | 0 | 0 | 1 Ref      |
| MZ334514 | Unassigned | Unassigned | Unassigned | 317_0  | Clustered | 33 VC_317_0  | 33  | 0.8756 | 1          | 0.8756 | 0 | 0 | 0 | 1 Ref      |
| MZ334515 | Unassigned | Unassigned | Unassigned | 317_0  | Clustered | 33 VC_317_0  | 33  | 0.8756 | 1          | 0.8756 | 0 | 0 | 0 | 1 Ref      |
| MZ334516 | Unassigned | Unassigned | Unassigned | 317_0  | Clustered | 33 VC_317_0  | 33  | 0.8756 | 1          | 0.8756 | 0 | 0 | 0 | 1 Ref      |
| MZ334517 | Unassigned | Unassigned | Unassigned | 318_0  | Clustered | 6 VC_318_0   | 6   | 0.1981 | 1          | 0.1981 | 0 | 0 | 0 | 1 Ref      |
| MZ334518 | Unassigned | Unassigned | Unassigned | 318_0  | Clustered | 6 VC_318_0   | 6   | 0.1981 | 1          | 0.1981 | 0 | 0 | 0 | 1 Ref      |
| MZ334519 | Unassigned | Unassigned | Unassigned | 318_0  | Clustered | 6 VC_318_0   | 6   | 0.1981 | 1          | 0.1981 | 0 | 0 | 0 | 1 Ref      |
| MZ334520 | Unassigned | Unassigned | Unassigned | 318_0  | Clustered | 6 VC_318_0   | 6   | 0.1981 | 1          | 0.1981 | 0 | 0 | 0 | 1 Ref      |
| MZ334523 | Unassigned | Unassigned | Unassigned | 320_1  | Clustered | 3 VC_320_1   | 3   | 0.346  | 0.99812624 | 0.3454 | 0 | 0 | 0 | 1 Ref      |
| MZ334524 | Unassigned | Unassigned | Unassigned | 320_0  | Clustered | 2 VC_320_0   | 2   | 0.1705 | 0.90744399 | 0.1547 | 0 | 0 | 0 | 1 Ref      |
| MZ334525 | Unassigned | Unassigned | Unassigned | 319_0  | Clustered | 2 VC_319_0   | 2   | 0.0304 | 0.95436427 | 0.029  | 0 | 0 | 0 | 1 Ref      |
| MZ334526 | Unassigned | Unassigned | Unassigned | 473_0  | Clustered | 3 VC_473_0   | 3   | 0.8515 | 0.99054823 | 0.8434 | 0 | 0 | 0 | 1 Ref      |
| MZ334527 | Unassigned | Unassigned | Unassigned | 1037_0 | Clustered | 2 VC_1037_0  | 2   | 0.1804 | 0.72090768 | 0.1301 | 0 | 0 | 0 | 1 Ref      |
| MZ336020 | Unassigned | Unassigned | Unassigned | 817_0  | Clustered | 12 VC_817_0  | 12  | 0.8497 | 1          | 0.8497 | 0 | 0 | 0 | 1 Ref      |
| MZ342906 | Unassigned | Unassigned | Unassigned | 837_0  | Clustered | 12 VC_837_0  | 12  | 0.2327 | 1          | 0.2327 | 0 | 0 | 0 | 1 Ref      |
| MZ345003 | Unassigned | Unassigned | Unassigned | 127_0  | Clustered | 17 VC_127_0  | 17  | 0.9222 | 1          | 0.9222 | 0 | 0 | 0 | 1 Ref      |
| MZ348421 | Unassigned | Unassigned | Unassigned | 865_0  | Clustered | 10 VC_865_0  | 10  | 0.5975 | 1          | 0.5975 | 0 | 0 | 0 | 1 Ref      |
| MZ348422 | Unassigned | Unassigned | Unassigned | 456_2  | Clustered | 4 VC_456_2   | 4   | 0.0833 | 0.99988129 | 0.0833 | 0 | 0 | 0 | 0.8333 Ref |
| MZ348423 | Unassigned | Unassigned | Unassigned | 508_1  | Clustered | 5 VC_508_1   | 5   | 0.0439 | 0.99999996 | 0.0439 | 0 | 0 | 0 | 1 Ref      |
| MZ348425 | Unassigned | Unassigned | Unassigned | 712_0  | Clustered | 5 VC_712_0   | 5   | 0.828  | 0.99999971 | 0.828  | 0 | 0 | 0 | 1 Ref      |
| MZ348426 | Unassigned | Unassigned | Unassigned | 79_3   | Clustered | 11 VC_79_3   | 11  | 0.2561 | 1          | 0.2561 | 0 | 0 | 0 | 1 Ref      |
| MZ355721 | Unassigned | Unassigned | Unassigned | 243_0  | Clustered | 72 VC_243_0  | 72  | 0.8089 | 1          | 0.8089 | 0 | 0 | 0 | 1 Ref      |
| MZ355722 | Unassigned | Unassigned | Unassigned | 335_55 | Clustered | 2 VC_335_55  | 2   | 0.006  | 0.95750995 | 0.0058 | 0 | 0 | 0 | 1 Ref      |
| MZ355723 | Unassigned | Unassigned | Unassigned | 533_0  | Clustered | 16 VC_533_0  | 16  | 0.3765 | 1          | 0.3765 | 0 | 0 | 0 | 1 Ref      |
| MZ355724 | Unassigned | Unassigned | Unassigned | 881_0  | Clustered | 7 VC_881_0   | 7   | 0.3448 | 1          | 0.3448 | 0 | 0 | 0 | 1 Ref      |
| MZ355725 | Unassigned | Unassigned | Unassigned | 535_1  | Clustered | 108 VC_535_1 | 108 | 0.8479 | 1          | 0.8479 | 0 | 0 | 0 | 0.9955 Ref |
| MZ355726 | Unassigned | Unassigned | Unassigned | 335_34 | Clustered | 2 VC_335_34  | 2   | 0.0045 | 0.95750889 | 0.0043 | 0 | 0 | 0 | 1 Ref      |
| MZ355728 | Unassigned | Unassigned | Unassigned | 225_6  | Clustered | 42 VC_223_6  | 42  | 0.4717 | 1          | 0.4717 | 0 | 0 | 0 | 0.8351 Ref |
| MZ358387 | Unassigned | Unassigned | Unassigned | 801_0  | Clustered | 37 VC_801_0  | 37  | 0.5672 | 1          | 0.5672 | 0 | 0 | 0 | 1 Ref      |
| MZ359091 | Unassigned | Unassigned | Unassigned | 98_0   | Clustered | 30 VC_98_0   | 30  | 0.7175 | 1          | 0.7175 | 0 | 0 | 0 | 1 Ref      |
| MZ359670 | Unassigned | Unassigned | Unassigned | 398_0  | Clustered | 51 VC_398_0  | 51  | 0.8741 | 1          | 0.8741 | 0 | 0 | 0 | 1 Ref      |
| MZ361825 | Unassigned | Unassigned | Unassigned | 392_0  | Clustered | 9 VC_392_0   | 9   | 0.7527 | 1          | 0.7527 | 0 | 0 | 0 | 1 Ref      |
| MZ361826 | Unassigned | Unassigned | Unassigned | 392_0  | Clustered | 9 VC_392_0   | 9   | 0.7527 | 1          | 0.7527 | 0 | 0 | 0 | 1 Ref      |
| MZ361827 | Unassigned | Unassigned | Unassigned | 392_0  | Clustered | 9 VC_392_0   | 9   | 0.7527 | 1          | 0.7527 | 0 | 0 | 0 | 1 Ref      |
| MZ364222 | Unassigned | Unassigned | Unassigned | 1108_0 | Clustered | 52 VC_1108_0 | 52  | 0.7674 | 1          | 0.7674 | 0 | 0 | 0 | 1 Ref      |
| MZ364223 | Unassigned | Unassigned | Unassigned | 1108_0 | Clustered | 52 VC_1108_0 | 52  | 0.7674 | 1          | 0.7674 | 0 | 0 | 0 | 1 Ref      |
| MZ364224 | Unassigned | Unassigned | Unassigned | 1119_0 | Clustered | 48 VC_1119_0 | 48  | 0.852  | 1          | 0.852  | 0 | 0 | 0 | 1 Ref      |
| MZ364225 | Unassigned | Unassigned | Unassigned | 1119_0 | Clustered | 48 VC_1119_0 | 48  | 0.852  | 1          | 0.852  | 0 | 0 | 0 | 1 Ref      |
| MZ364226 | Unassigned | Unassigned | Unassigned | 1033_0 | Clustered | 21 VC_1033_0 | 21  | 0.8433 | 0.99999998 | 0.8433 | 0 | 0 | 0 | 1 Ref      |
| MZ364227 | Unassigned | Unassigned | Unassigned | 1119_0 | Clustered | 48 VC_1119_0 | 48  | 0.852  | 1          | 0.852  | 0 | 0 | 0 | 1 Ref      |
| MZ364228 | Unassigned | Unassigned | Unassigned | 1028_0 | Clustered | 69 VC_1028_0 | 69  | 0.8547 | 1          | 0.8547 | 0 | 0 | 0 | 1 Ref      |
| MZ364229 | Unassigned | Unassigned | Unassigned | 1502_0 | Clustered | 4 VC_1502_0  | 4   | 1      | 1          | 1      | 0 | 0 | 0 | 1 Ref      |
| MZ364231 | Unassigned | Unassigned | Unassigned | 1111_0 | Clustered | 5 VC_1111_0  | 5   | 1      | 1          | 1      | 0 | 0 | 0 | 1 Ref      |
| MZ364232 | Unassigned | Unassigned | Unassigned | 1108_0 | Clustered | 52 VC_1108_0 | 52  | 0.7674 | 1          | 0.7674 | 0 | 0 | 0 | 1 Ref      |
| MZ364233 | Unassigned | Unassigned | Unassigned | 1028_0 | Clustered | 69 VC_1028_0 | 69  | 0.8547 | 1          | 0.8547 | 0 | 0 | 0 | 1 Ref      |
| MZ364234 | Unassigned | Unassigned | Unassigned | 1388_0 | Clustered | 4 VC_1388_0  | 4   | 0.6008 | 0.54407361 | 0.3269 | 0 | 0 | 0 | 1 Ref      |
| MZ364235 | Unassigned | Unassigned | Unassigned | 1536_0 | Clustered | 6 VC_1536_0  | 6   | 1      | 1          | 1      | 0 | 0 | 0 | 1 Ref      |
| MZ364236 | Unassigned | Unassigned | Unassigned | 1536_0 | Clustered | 6 VC_1536_0  | 6   | 1      | 1          | 1      | 0 | 0 | 0 | 1 Ref      |
| MZ364238 | Unassigned | Unassigned | Unassigned | 1536_0 | Clustered | 6 VC_1536_0  | 6   | 1      | 1          | 1      | 0 | 0 | 0 | 1 Ref      |
| MZ364239 | Unassigned | Unassigned | Unassigned | 1536_0 | Clustered | 6 VC_1536_0  | 6   | 1      | 1          | 1      | 0 | 0 | 0 | 1 Ref      |
| MZ364240 | Unassigned | Unassigned | Unassigned | 1028_0 | Clustered | 69 VC_1028_0 | 69  | 0.8547 | 1          | 0.8547 | 0 | 0 | 0 | 1 Ref      |
| MZ364241 | Unassigned | Unassigned | Unassigned | 1033_0 | Clustered | 21 VC_1033_0 | 21  | 0.8433 | 0.99999998 | 0.8433 | 0 | 0 | 0 | 1 Ref      |
| MZ364242 | Unassigned | Unassigned | Unassigned | 1104_0 | Clustered | 44 VC_1104_0 | 44  | 0.9574 | 0.72818579 | 0.6972 | 0 | 0 | 0 | 1 Ref      |
| MZ364243 | Unassigned | Unassigned | Unassigned | 1028_0 | Clustered | 69 VC_1028_0 | 69  | 0.8547 | 1          | 0.8547 | 0 | 0 | 0 | 1 Ref      |
| MZ364244 | Unassigned | Unassigned | Unassigned | 1033_0 | Clustered | 21 VC_1033_0 | 21  | 0.8433 | 0.99999998 | 0.8433 | 0 | 0 | 0 | 1 Ref      |
| MZ364245 | Unassigned | Unassigned | Unassigned | 1033_0 | Clustered | 21 VC_1033_0 | 21  | 0.8433 | 0.99999998 | 0.8433 | 0 | 0 | 0 | 1 Ref      |
| MZ364246 | Unassigned | Unassigned | Unassigned | 1033_0 | Clustered | 21 VC_1033_0 | 21  | 0.8433 | 0.99999998 | 0.8433 | 0 | 0 | 0 | 1 Ref      |
| MZ364247 | Unassigned | Unassigned | Unassigned | 1033_0 | Clustered | 21 VC_1033_0 | 21  | 0.8433 | 0.99999998 | 0.8433 | 0 | 0 | 0 | 1 Ref      |
| MZ364248 | Unassigned | Unassigned | Unassigned | 1108_0 | Clustered | 52 VC_1108_0 | 52  | 0.7674 | 1          | 0.7674 | 0 | 0 | 0 | 1 Ref      |
| MZ364249 | Unassigned | Unassigned | Unassigned | 1033_0 | Clustered | 21 VC_1033_0 | 21  | 0.8433 | 0.99999998 | 0.8433 | 0 | 0 | 0 | 1 Ref      |
| MZ364250 | Unassigned | Unassigned | Unassigned | 1033_0 | Clustered | 21 VC_1033_0 | 21  | 0.8433 | 0.99999998 | 0.8433 | 0 | 0 | 0 | 1 Ref      |
| MZ364251 | Unassigned | Unassigned | Unassigned | 1537_0 | Clustered | 3 VC_1537_0  | 3   | 1      | 1          | 1      | 0 | 0 | 0 | 1 Ref      |
| MZ364252 | Unassigned | Unassigned | Unassigned | 1401_0 | Clustered | 4 VC_1401_0  | 4   | 1      | 1          | 1      | 0 | 0 | 0 | 1 Ref      |
| MZ364254 | Unassigned | Unassigned | Unassigned | 1108_0 | Clustered | 52 VC_1108_0 | 52  | 0.7674 | 1          | 0.7674 | 0 | 0 | 0 | 1 Ref      |
| MZ364255 | Unassigned | Unassigned | Unassigned | 1108_0 | Clustered | 52 VC_1108_0 | 52  | 0.7674 | 1          | 0.7674 | 0 | 0 | 0 | 1 Ref      |
| MZ364256 | Unassigned | Unassigned | Unassigned | 1028_0 | Clustered | 69 VC_1028_0 | 69  | 0.8547 | 1          | 0.8547 | 0 | 0 | 0 | 1 Ref      |
| MZ364257 | Unassigned | Unassigned | Unassigned | 1536_0 | Clustered | 6 VC_1536_0  | 6   | 1      | 1          | 1      | 0 | 0 | 0 | 1 Ref      |
| MZ364258 | Unassigned | Unassigned | Unassigned | 1028_0 | Clustered | 69 VC_1028_0 | 69  | 0.8547 | 1          | 0.8547 | 0 | 0 | 0 | 1 Ref      |
| MZ364259 | Unassigned | Unassigned | Unassigned | 1028_0 | Clustered | 69 VC_1028_0 | 69  | 0.8547 | 1          | 0.8547 | 0 | 0 | 0 | 1 Ref      |
| MZ364260 | Unassigned | Unassigned | Unassigned | 1033_0 | Clustered | 21 VC_1033_0 | 21  | 0.8433 | 0.99999998 | 0.8433 | 0 | 0 | 0 | 1 Ref      |
| MZ364261 | Unassigned | Unassigned | Unassigned | 1108_0 | Clustered | 52 VC_1108_0 | 52  | 0.7674 | 1          | 0.7674 | 0 | 0 | 0 | 1 Ref      |
| MZ364262 | Unassigned | Unassigned | Unassigned | 1108_0 | Clustered | 52 VC_1108_0 | 52  | 0.7674 | 1          | 0.7674 | 0 | 0 | 0 | 1 Ref      |
| MZ364263 | Unassigned | Unassigned | Unassigned | 1033_0 | Clustered | 21 VC_1033_0 | 21  | 0.8433 | 0.99999998 | 0.8433 | 0 | 0 | 0 | 1 Ref      |
| MZ364264 | Unassigned | Unassigned | Unassigned | 1108_0 | Clustered | 52 VC_1108_0 | 52  | 0.7674 | 1          | 0.7674 | 0 | 0 | 0 | 1 Ref      |



|          |            |            |            |        |           |     |           |     |        |            |        |   |   |   |        |     |
|----------|------------|------------|------------|--------|-----------|-----|-----------|-----|--------|------------|--------|---|---|---|--------|-----|
| MZ364265 | Unassigned | Unassigned | Unassigned | 1108_0 | Clustered | 52  | VC_1108_0 | 52  | 0.7674 | 1          | 0.7674 | 0 | 0 | 0 | 1      | Ref |
| MZ364266 | Unassigned | Unassigned | Unassigned | 1033_0 | Clustered | 21  | VC_1033_0 | 21  | 0.8433 | 0.99999998 | 0.8433 | 0 | 0 | 0 | 1      | Ref |
| MZ364267 | Unassigned | Unassigned | Unassigned | 1028_0 | Clustered | 69  | VC_1028_0 | 69  | 0.8547 | 1          | 0.8547 | 0 | 0 | 0 | 1      | Ref |
| MZ364268 | Unassigned | Unassigned | Unassigned | 1108_0 | Clustered | 52  | VC_1108_0 | 52  | 0.7674 | 1          | 0.7674 | 0 | 0 | 0 | 1      | Ref |
| MZ364269 | Unassigned | Unassigned | Unassigned | 1108_0 | Clustered | 52  | VC_1108_0 | 52  | 0.7674 | 1          | 0.7674 | 0 | 0 | 0 | 1      | Ref |
| MZ364270 | Unassigned | Unassigned | Unassigned | 1033_0 | Clustered | 21  | VC_1033_0 | 21  | 0.8433 | 0.99999998 | 0.8433 | 0 | 0 | 0 | 1      | Ref |
| MZ364271 | Unassigned | Unassigned | Unassigned | 1108_0 | Clustered | 52  | VC_1108_0 | 52  | 0.7674 | 1          | 0.7674 | 0 | 0 | 0 | 1      | Ref |
| MZ364272 | Unassigned | Unassigned | Unassigned | 1108_0 | Clustered | 52  | VC_1108_0 | 52  | 0.7674 | 1          | 0.7674 | 0 | 0 | 0 | 1      | Ref |
| MZ364273 | Unassigned | Unassigned | Unassigned | 1108_0 | Clustered | 52  | VC_1108_0 | 52  | 0.7674 | 1          | 0.7674 | 0 | 0 | 0 | 1      | Ref |
| MZ364274 | Unassigned | Unassigned | Unassigned | 1028_0 | Clustered | 69  | VC_1028_0 | 69  | 0.8547 | 1          | 0.8547 | 0 | 0 | 0 | 1      | Ref |
| MZ364275 | Unassigned | Unassigned | Unassigned | 1108_0 | Clustered | 52  | VC_1108_0 | 52  | 0.7674 | 1          | 0.7674 | 0 | 0 | 0 | 1      | Ref |
| MZ364276 | Unassigned | Unassigned | Unassigned | 1108_0 | Clustered | 52  | VC_1108_0 | 52  | 0.7674 | 1          | 0.7674 | 0 | 0 | 0 | 1      | Ref |
| MZ364277 | Unassigned | Unassigned | Unassigned | 1119_0 | Clustered | 48  | VC_1119_0 | 48  | 0.852  | 1          | 0.852  | 0 | 0 | 0 | 1      | Ref |
| MZ364278 | Unassigned | Unassigned | Unassigned | 1108_0 | Clustered | 52  | VC_1108_0 | 52  | 0.7674 | 1          | 0.7674 | 0 | 0 | 0 | 1      | Ref |
| MZ364279 | Unassigned | Unassigned | Unassigned | 1119_0 | Clustered | 48  | VC_1119_0 | 48  | 0.852  | 1          | 0.852  | 0 | 0 | 0 | 1      | Ref |
| MZ364280 | Unassigned | Unassigned | Unassigned | 1111_0 | Clustered | 5   | VC_1111_0 | 5   | 1      | 1          | 1      | 0 | 0 | 0 | 1      | Ref |
| MZ364282 | Unassigned | Unassigned | Unassigned | 1537_0 | Clustered | 3   | VC_1537_0 | 3   | 1      | 1          | 1      | 0 | 0 | 0 | 1      | Ref |
| MZ364283 | Unassigned | Unassigned | Unassigned | 1119_0 | Clustered | 48  | VC_1119_0 | 48  | 0.852  | 1          | 0.852  | 0 | 0 | 0 | 1      | Ref |
| MZ364284 | Unassigned | Unassigned | Unassigned | 1111_0 | Clustered | 5   | VC_1111_0 | 5   | 1      | 1          | 1      | 0 | 0 | 0 | 1      | Ref |
| MZ364285 | Unassigned | Unassigned | Unassigned | 1119_0 | Clustered | 48  | VC_1119_0 | 48  | 0.852  | 1          | 0.852  | 0 | 0 | 0 | 1      | Ref |
| MZ364286 | Unassigned | Unassigned | Unassigned | 1119_0 | Clustered | 48  | VC_1119_0 | 48  | 0.852  | 1          | 0.852  | 0 | 0 | 0 | 1      | Ref |
| MZ364288 | Unassigned | Unassigned | Unassigned | 1502_0 | Clustered | 4   | VC_1502_0 | 4   | 1      | 1          | 1      | 0 | 0 | 0 | 1      | Ref |
| MZ364289 | Unassigned | Unassigned | Unassigned | 1536_0 | Clustered | 6   | VC_1536_0 | 6   | 1      | 1          | 1      | 0 | 0 | 0 | 1      | Ref |
| MZ364291 | Unassigned | Unassigned | Unassigned | 1119_0 | Clustered | 48  | VC_1119_0 | 48  | 0.852  | 1          | 0.852  | 0 | 0 | 0 | 1      | Ref |
| MZ364293 | Unassigned | Unassigned | Unassigned | 1401_0 | Clustered | 4   | VC_1401_0 | 4   | 1      | 1          | 1      | 0 | 0 | 0 | 1      | Ref |
| MZ364294 | Unassigned | Unassigned | Unassigned | 1537_0 | Clustered | 3   | VC_1537_0 | 3   | 1      | 1          | 1      | 0 | 0 | 0 | 1      | Ref |
| MZ368140 | Unassigned | Unassigned | Unassigned | 218_0  | Clustered | 4   | VC_218_0  | 4   | 0.1097 | 0.99998788 | 0.1097 | 0 | 0 | 0 | 1      | Ref |
| MZ369152 | Unassigned | Unassigned | Unassigned | 981_0  | Clustered | 9   | VC_981_0  | 9   | 0.5418 | 1          | 0.5418 | 0 | 0 | 0 | 1      | Ref |
| MZ374361 | Unassigned | Unassigned | Unassigned | 125_0  | Clustered | 23  | VC_125_0  | 23  | 0.8163 | 1          | 0.8163 | 0 | 0 | 0 | 1      | Ref |
| MZ375232 | Unassigned | Unassigned | Unassigned | 475_0  | Clustered | 96  | VC_475_0  | 96  | 0.9303 | 1          | 0.9303 | 0 | 0 | 0 | 0.9575 | Ref |
| MZ375233 | Unassigned | Unassigned | Unassigned | 405_0  | Clustered | 126 | VC_405_0  | 126 | 0.9614 | 1          | 0.9614 | 0 | 0 | 0 | 1      | Ref |
| MZ375234 | Unassigned | Unassigned | Unassigned | 405_0  | Clustered | 126 | VC_405_0  | 126 | 0.9614 | 1          | 0.9614 | 0 | 0 | 0 | 1      | Ref |
| MZ375235 | Unassigned | Unassigned | Unassigned | 405_0  | Clustered | 126 | VC_405_0  | 126 | 0.9614 | 1          | 0.9614 | 0 | 0 | 0 | 1      | Ref |
| MZ375236 | Unassigned | Unassigned | Unassigned | 405_0  | Clustered | 126 | VC_405_0  | 126 | 0.9614 | 1          | 0.9614 | 0 | 0 | 0 | 1      | Ref |
| MZ375237 | Unassigned | Unassigned | Unassigned | 405_0  | Clustered | 126 | VC_405_0  | 126 | 0.9614 | 1          | 0.9614 | 0 | 0 | 0 | 1      | Ref |
| MZ375238 | Unassigned | Unassigned | Unassigned | 405_0  | Clustered | 126 | VC_405_0  | 126 | 0.9614 | 1          | 0.9614 | 0 | 0 | 0 | 1      | Ref |
| MZ375239 | Unassigned | Unassigned | Unassigned | 405_0  | Clustered | 126 | VC_405_0  | 126 | 0.9614 | 1          | 0.9614 | 0 | 0 | 0 | 1      | Ref |
| MZ375240 | Unassigned | Unassigned | Unassigned | 405_0  | Clustered | 126 | VC_405_0  | 126 | 0.9614 | 1          | 0.9614 | 0 | 0 | 0 | 1      | Ref |
| MZ375241 | Unassigned | Unassigned | Unassigned | 405_0  | Clustered | 126 | VC_405_0  | 126 | 0.9614 | 1          | 0.9614 | 0 | 0 | 0 | 1      | Ref |
| MZ375242 | Unassigned | Unassigned | Unassigned | 405_0  | Clustered | 126 | VC_405_0  | 126 | 0.9614 | 1          | 0.9614 | 0 | 0 | 0 | 1      | Ref |
| MZ375243 | Unassigned | Unassigned | Unassigned | 405_0  | Clustered | 126 | VC_405_0  | 126 | 0.9614 | 1          | 0.9614 | 0 | 0 | 0 | 1      | Ref |
| MZ375244 | Unassigned | Unassigned | Unassigned | 405_0  | Clustered | 126 | VC_405_0  | 126 | 0.9614 | 1          | 0.9614 | 0 | 0 | 0 | 1      | Ref |
| MZ375245 | Unassigned | Unassigned | Unassigned | 405_0  | Clustered | 126 | VC_405_0  | 126 | 0.9614 | 1          | 0.9614 | 0 | 0 | 0 | 1      | Ref |
| MZ375246 | Unassigned | Unassigned | Unassigned | 405_0  | Clustered | 126 | VC_405_0  | 126 | 0.9614 | 1          | 0.9614 | 0 | 0 | 0 | 1      | Ref |
| MZ375247 | Unassigned | Unassigned | Unassigned | 405_0  | Clustered | 126 | VC_405_0  | 126 | 0.9614 | 1          | 0.9614 | 0 | 0 | 0 | 1      | Ref |
| MZ375248 | Unassigned | Unassigned | Unassigned | 405_0  | Clustered | 126 | VC_405_0  | 126 | 0.9614 | 1          | 0.9614 | 0 | 0 | 0 | 1      | Ref |
| MZ375249 | Unassigned | Unassigned | Unassigned | 405_0  | Clustered | 126 | VC_405_0  | 126 | 0.9614 | 1          | 0.9614 | 0 | 0 | 0 | 1      | Ref |
| MZ375250 | Unassigned | Unassigned | Unassigned | 405_0  | Clustered | 126 | VC_405_0  | 126 | 0.9614 | 1          | 0.9614 | 0 | 0 | 0 | 1      | Ref |
| MZ375251 | Unassigned | Unassigned | Unassigned | 405_0  | Clustered | 126 | VC_405_0  | 126 | 0.9614 | 1          | 0.9614 | 0 | 0 | 0 | 1      | Ref |
| MZ375252 | Unassigned | Unassigned | Unassigned | 405_0  | Clustered | 126 | VC_405_0  | 126 | 0.9614 | 1          | 0.9614 | 0 | 0 | 0 | 1      | Ref |
| MZ375253 | Unassigned | Unassigned | Unassigned | 405_0  | Clustered | 126 | VC_405_0  | 126 | 0.9614 | 1          | 0.9614 | 0 | 0 | 0 | 1      | Ref |
| MZ375254 | Unassigned | Unassigned | Unassigned | 405_0  | Clustered | 126 | VC_405_0  | 126 | 0.9614 | 1          | 0.9614 | 0 | 0 | 0 | 1      | Ref |
| MZ375255 | Unassigned | Unassigned | Unassigned | 405_0  | Clustered | 126 | VC_405_0  | 126 | 0.9614 | 1          | 0.9614 | 0 | 0 | 0 | 1      | Ref |
| MZ375256 | Unassigned | Unassigned | Unassigned | 405_0  | Clustered | 126 | VC_405_0  | 126 | 0.9614 | 1          | 0.9614 | 0 | 0 | 0 | 1      | Ref |
| MZ375257 | Unassigned | Unassigned | Unassigned | 405_0  | Clustered | 126 | VC_405_0  | 126 | 0.9614 | 1          | 0.9614 | 0 | 0 | 0 | 1      | Ref |
| MZ375258 | Unassigned | Unassigned | Unassigned | 405_0  | Clustered | 126 | VC_405_0  | 126 | 0.9614 | 1          | 0.9614 | 0 | 0 | 0 | 1      | Ref |
| MZ375259 | Unassigned | Unassigned | Unassigned | 405_0  | Clustered | 126 | VC_405_0  | 126 | 0.9614 | 1          | 0.9614 | 0 | 0 | 0 | 1      | Ref |
| MZ375260 | Unassigned | Unassigned | Unassigned | 405_0  | Clustered | 126 | VC_405_0  | 126 | 0.9614 | 1          | 0.9614 | 0 | 0 | 0 | 1      | Ref |
| MZ375261 | Unassigned | Unassigned | Unassigned | 405_0  | Clustered | 126 | VC_405_0  | 126 | 0.9614 | 1          | 0.9614 | 0 | 0 | 0 | 1      | Ref |
| MZ375262 | Unassigned | Unassigned | Unassigned | 405_0  | Clustered | 126 | VC_405_0  | 126 | 0.9614 | 1          | 0.9614 | 0 | 0 | 0 | 1      | Ref |
| MZ375263 | Unassigned | Unassigned | Unassigned | 405_0  | Clustered | 126 | VC_405_0  | 126 | 0.9614 | 1          | 0.9614 | 0 | 0 | 0 | 1      | Ref |
| MZ375264 | Unassigned | Unassigned | Unassigned | 405_0  | Clustered | 126 | VC_405_0  | 126 | 0.9614 | 1          | 0.9614 | 0 | 0 | 0 | 1      | Ref |
| MZ375265 | Unassigned | Unassigned | Unassigned | 405_0  | Clustered | 126 | VC_405_0  | 126 | 0.9614 | 1          | 0.9614 | 0 | 0 | 0 | 1      | Ref |
| MZ375266 | Unassigned | Unassigned | Unassigned | 405_0  | Clustered | 126 | VC_405_0  | 126 | 0.9614 | 1          | 0.9614 | 0 | 0 | 0 | 1      | Ref |
| MZ375267 | Unassigned | Unassigned | Unassigned | 405_0  | Clustered | 126 | VC_405_0  | 126 | 0.9614 | 1          | 0.9614 | 0 | 0 | 0 | 1      | Ref |
| MZ375268 | Unassigned | Unassigned | Unassigned | 405_0  | Clustered | 126 | VC_405_0  | 126 | 0.9614 | 1          | 0.9614 | 0 | 0 | 0 | 1      | Ref |
| MZ375269 | Unassigned | Unassigned | Unassigned | 405_0  | Clustered | 126 | VC_405_0  | 126 | 0.9614 | 1          | 0.9614 | 0 | 0 | 0 | 1      | Ref |
| MZ375270 | Unassigned | Unassigned | Unassigned | 405_0  | Clustered | 126 | VC_405_0  | 126 | 0.9614 | 1          | 0.9614 | 0 | 0 | 0 | 1      | Ref |
| MZ375271 | Unassigned | Unassigned | Unassigned | 405_0  | Clustered | 126 | VC_405_0  | 126 | 0.9614 | 1          | 0.9614 | 0 | 0 | 0 | 1      | Ref |
| MZ375272 | Unassigned | Unassigned | Unassigned | 405_0  | Clustered | 126 | VC_405_0  | 126 | 0.9614 | 1          | 0.9614 | 0 | 0 | 0 | 1      | Ref |
| MZ375273 | Unassigned | Unassigned | Unassigned | 405_0  | Clustered | 126 | VC_405_0  | 126 | 0.9614 | 1          | 0.9614 | 0 | 0 | 0 | 1      | Ref |
| MZ375274 | Unassigned | Unassigned | Unassigned | 405_0  | Clustered | 126 | VC_405_0  | 126 | 0.9614 | 1          | 0.9614 | 0 | 0 | 0 | 1      | Ref |
| MZ375275 | Unassigned | Unassigned | Unassigned | 405_0  | Clustered | 126 | VC_405_0  | 126 | 0.9614 | 1          | 0.9614 | 0 | 0 | 0 | 1      | Ref |
| MZ375276 | Unassigned | Unassigned | Unassigned | 405_0  | Clustered | 126 | VC_405_0  | 126 | 0.9614 | 1          | 0.9614 | 0 | 0 | 0 | 1      | Ref |
| MZ375277 | Unassigned | Unassigned | Unassigned | 405_0  | Clustered | 126 | VC_405_0  | 126 | 0.9614 | 1          | 0.9614 | 0 | 0 | 0 | 1      | Ref |
| MZ375278 | Unassigned | Unassigned | Unassigned | 405_0  | Clustered | 126 | VC_405_0  | 126 | 0.9614 | 1          | 0.9614 | 0 | 0 | 0 | 1      | Ref |
| MZ375279 | Unassigned | Unassigned | Unassigned | 405_0  | Clustered | 126 | VC_405_0  | 126 | 0.9614 | 1          | 0.9614 | 0 | 0 | 0 | 1      | Ref |
| MZ375280 | Unassigned | Unassigned | Unassigned | 405_0  | Clustered | 126 | VC_405_0  | 126 | 0.9614 | 1          | 0.9614 | 0 | 0 | 0 | 1      | Ref |
| MZ375281 | Unassigned | Unassigned | Unassigned | 405_0  | Clustered | 126 | VC_405_0  | 126 | 0.9614 | 1          | 0.9614 | 0 | 0 | 0 | 1      | Ref |
| MZ375282 | Unassigned | Unassigned | Unassigned | 405_0  | Clustered | 126 | VC_405_0  | 126 | 0.9614 | 1          | 0.9614 | 0 | 0 | 0 | 1      | Ref |
| MZ375283 | Unassigned | Unassigned | Unassigned | 405_0  | Clustered | 126 | VC_405_0  | 126 | 0.9614 | 1          | 0.9614 | 0 | 0 | 0 | 1      | Ref |



[illegible]



|          |            |            |            |         |                     |              |     |        |            |        |   |   |   |            |
|----------|------------|------------|------------|---------|---------------------|--------------|-----|--------|------------|--------|---|---|---|------------|
| MZ388556 | Unassigned | Unassigned | Unassigned | 898_1   | Clustered           | 27 VC_898_1  | 27  | 0.8894 | 1          | 0.8894 | 0 | 0 | 0 | 1 Ref      |
| MZ394712 | Unassigned | Unassigned | Unassigned | 801_0   | Clustered           | 37 VC_801_0  | 37  | 0.5672 | 1          | 0.5672 | 0 | 0 | 0 | 1 Ref      |
| MZ398021 | Unassigned | Unassigned | Unassigned | 125_0   | Clustered           | 23 VC_125_0  | 23  | 0.8163 | 1          | 0.8163 | 0 | 0 | 0 | 1 Ref      |
| MZ398135 | Unassigned | Unassigned | Unassigned | 111_0   | Clustered           | 3 VC_111_0   | 3   | 0.1693 | 0.99835623 | 0.169  | 0 | 0 | 0 | 1 Ref      |
| MZ398136 | Unassigned | Unassigned | Unassigned | 111_0   | Clustered           | 3 VC_111_0   | 3   | 0.1693 | 0.99835623 | 0.169  | 0 | 0 | 0 | 1 Ref      |
| MZ398240 | Unassigned | Unassigned | Unassigned | 689_0   | Clustered           | 5 VC_689_0   | 5   | 0.5195 | 0.99999996 | 0.5195 | 0 | 0 | 0 | 1 Ref      |
| MZ398241 | Unassigned | Unassigned | Unassigned | 689_0   | Clustered           | 5 VC_689_0   | 5   | 0.5195 | 0.99999996 | 0.5195 | 0 | 0 | 0 | 1 Ref      |
| MZ398242 | Unassigned | Unassigned | Unassigned | 972_0   | Clustered           | 99 VC_972_0  | 99  | 0.9113 | 1          | 0.9113 | 0 | 0 | 0 | 0.9928 Ref |
| MZ398243 | Unassigned | Unassigned | Unassigned | 837_0   | Clustered           | 12 VC_837_0  | 12  | 0.2327 | 1          | 0.2327 | 0 | 0 | 0 | 1 Ref      |
| MZ398244 | Unassigned | Unassigned | Unassigned | 466_0   | Clustered           | 66 VC_466_0  | 66  | 0.9246 | 1          | 0.9246 | 0 | 0 | 0 | 1 Ref      |
| MZ398245 | Unassigned | Unassigned | Unassigned | 125_0   | Clustered           | 23 VC_125_0  | 23  | 0.8163 | 1          | 0.8163 | 0 | 0 | 0 | 1 Ref      |
| MZ398246 | Unassigned | Unassigned | Unassigned | 198_24  | Clustered           | 5 VC_198_24  | 5   | 0.029  | 0.9999995  | 0.029  | 0 | 0 | 0 | 0.7 Ref    |
| MZ398247 | Unassigned | Unassigned | Unassigned | 465_0   | Clustered           | 80 VC_465_0  | 80  | 0.9988 | 1          | 0.9988 | 0 | 0 | 0 | 1 Ref      |
| MZ398248 | Unassigned | Unassigned | Unassigned | 524_0   | Clustered           | 8 VC_524_0   | 8   | 0.7365 | 1          | 0.7365 | 0 | 0 | 0 | 1 Ref      |
| MZ399596 | Unassigned | Unassigned | Unassigned | 111_0   | Clustered           | 3 VC_111_0   | 3   | 0.1693 | 0.99835623 | 0.169  | 0 | 0 | 0 | 1 Ref      |
| MZ401005 | Unassigned | Unassigned | Unassigned | 929_0   | Clustered           | 10 VC_929_0  | 10  | 0.7185 | 1          | 0.7185 | 0 | 0 | 0 | 1 Ref      |
| MZ401006 | Unassigned | Unassigned | Unassigned | 839_0   | Clustered           | 8 VC_839_0   | 8   | 0.9889 | 1          | 0.9889 | 0 | 0 | 0 | 1 Ref      |
| MZ401007 | Unassigned | Unassigned | Unassigned | 929_0   | Clustered           | 10 VC_929_0  | 10  | 0.7185 | 1          | 0.7185 | 0 | 0 | 0 | 1 Ref      |
| MZ401008 | Unassigned | Unassigned | Unassigned | 929_0   | Clustered           | 10 VC_929_0  | 10  | 0.7185 | 1          | 0.7185 | 0 | 0 | 0 | 1 Ref      |
| MZ401009 | Unassigned | Unassigned | Unassigned | 929_0   | Clustered           | 10 VC_929_0  | 10  | 0.7185 | 1          | 0.7185 | 0 | 0 | 0 | 1 Ref      |
| MZ402608 | Unassigned | Unassigned | Unassigned | 991_0   | Clustered           | 39 VC_991_0  | 39  | 1      | 1          | 1      | 0 | 0 | 0 | 1 Ref      |
| MZ417315 | Unassigned | Unassigned | Unassigned | 155_25  | Clustered           | 14 VC_155_25 | 14  | 0.0941 | 1          | 0.0941 | 0 | 0 | 0 | 0.8791 Ref |
| MZ417319 | Unassigned | Unassigned | Unassigned | 155_25  | Clustered           | 14 VC_155_25 | 14  | 0.0941 | 1          | 0.0941 | 0 | 0 | 0 | 0.8791 Ref |
| MZ417320 | Unassigned | Unassigned | Unassigned | 155_25  | Clustered           | 14 VC_155_25 | 14  | 0.0941 | 1          | 0.0941 | 0 | 0 | 0 | 0.8791 Ref |
| MZ417321 | Unassigned | Unassigned | Unassigned | 155_25  | Clustered           | 14 VC_155_25 | 14  | 0.0941 | 1          | 0.0941 | 0 | 0 | 0 | 0.8791 Ref |
| MZ417322 | Unassigned | Unassigned | Unassigned | 155_24  | Clustered/Singleton | 1 VC_155_24  | 1   | 0      | 1          | 0      | 0 | 0 | 0 | 1 Ref      |
| MZ417323 | Unassigned | Unassigned | Unassigned | 156_0   | Clustered           | 13 VC_156_0  | 13  | 0.2378 | 1          | 0.2378 | 0 | 0 | 0 | 0.9872 Ref |
| MZ417325 | Unassigned | Unassigned | Unassigned | 156_0   | Clustered           | 13 VC_156_0  | 13  | 0.2378 | 1          | 0.2378 | 0 | 0 | 0 | 0.9872 Ref |
| MZ417327 | Unassigned | Unassigned | Unassigned | 155_25  | Clustered           | 14 VC_155_25 | 14  | 0.0941 | 1          | 0.0941 | 0 | 0 | 0 | 0.8791 Ref |
| MZ417328 | Unassigned | Unassigned | Unassigned | 155_25  | Clustered           | 14 VC_155_25 | 14  | 0.0941 | 1          | 0.0941 | 0 | 0 | 0 | 0.8791 Ref |
| MZ417329 | Unassigned | Unassigned | Unassigned | 157_0   | Clustered           | 6 VC_157_0   | 6   | 0.0724 | 1          | 0.0724 | 0 | 0 | 0 | 1 Ref      |
| MZ417330 | Unassigned | Unassigned | Unassigned | 157_0   | Clustered           | 6 VC_157_0   | 6   | 0.0724 | 1          | 0.0724 | 0 | 0 | 0 | 1 Ref      |
| MZ417331 | Unassigned | Unassigned | Unassigned | 155_26  | Clustered/Singleton | 1 VC_155_26  | 1   | 0      | 1          | 0      | 0 | 0 | 0 | 1 Ref      |
| MZ417332 | Unassigned | Unassigned | Unassigned | 155_25  | Clustered           | 14 VC_155_25 | 14  | 0.0941 | 1          | 0.0941 | 0 | 0 | 0 | 0.8791 Ref |
| MZ417336 | Unassigned | Unassigned | Unassigned | 685_0   | Clustered           | 7 VC_685_0   | 7   | 0.4045 | 1          | 0.4045 | 0 | 0 | 0 | 1 Ref      |
| MZ417337 | Unassigned | Unassigned | Unassigned | 155_25  | Clustered           | 14 VC_155_25 | 14  | 0.0941 | 1          | 0.0941 | 0 | 0 | 0 | 0.8791 Ref |
| MZ417339 | Unassigned | Unassigned | Unassigned | 685_0   | Clustered           | 7 VC_685_0   | 7   | 0.4045 | 1          | 0.4045 | 0 | 0 | 0 | 1 Ref      |
| MZ417340 | Unassigned | Unassigned | Unassigned | 155_25  | Clustered           | 14 VC_155_25 | 14  | 0.0941 | 1          | 0.0941 | 0 | 0 | 0 | 0.8791 Ref |
| MZ417343 | Unassigned | Unassigned | Unassigned | 685_0   | Clustered           | 7 VC_685_0   | 7   | 0.4045 | 1          | 0.4045 | 0 | 0 | 0 | 1 Ref      |
| MZ417344 | Unassigned | Unassigned | Unassigned | 157_0   | Clustered           | 6 VC_157_0   | 6   | 0.0724 | 1          | 0.0724 | 0 | 0 | 0 | 1 Ref      |
| MZ417345 | Unassigned | Unassigned | Unassigned | 155_25  | Clustered           | 14 VC_155_25 | 14  | 0.0941 | 1          | 0.0941 | 0 | 0 | 0 | 0.8791 Ref |
| MZ417346 | Unassigned | Unassigned | Unassigned | 155_25  | Clustered           | 14 VC_155_25 | 14  | 0.0941 | 1          | 0.0941 | 0 | 0 | 0 | 0.8791 Ref |
| MZ417347 | Unassigned | Unassigned | Unassigned | 155_25  | Clustered           | 14 VC_155_25 | 14  | 0.0941 | 1          | 0.0941 | 0 | 0 | 0 | 0.8791 Ref |
| MZ417348 | Unassigned | Unassigned | Unassigned | 685_0   | Clustered           | 7 VC_685_0   | 7   | 0.4045 | 1          | 0.4045 | 0 | 0 | 0 | 1 Ref      |
| MZ417350 | Unassigned | Unassigned | Unassigned | 155_25  | Clustered           | 14 VC_155_25 | 14  | 0.0941 | 1          | 0.0941 | 0 | 0 | 0 | 0.8791 Ref |
| MZ417354 | Unassigned | Unassigned | Unassigned | 155_25  | Clustered           | 14 VC_155_25 | 14  | 0.0941 | 1          | 0.0941 | 0 | 0 | 0 | 0.8791 Ref |
| MZ417521 | Unassigned | Unassigned | Unassigned | 290_174 | Clustered/Singleton | 1 VC_290_174 | 1   | 0      | 1          | 0      | 0 | 0 | 0 | 1 Ref      |
| MZ420150 | Unassigned | Unassigned | Unassigned | 93_0    | Clustered           | 22 VC_93_0   | 22  | 0.5285 | 1          | 0.5285 | 0 | 0 | 0 | 1 Ref      |
| MZ420230 | Unassigned | Unassigned | Unassigned | 235_0   | Clustered           | 60 VC_235_0  | 60  | 0.9413 | 1          | 0.9413 | 0 | 0 | 0 | 1 Ref      |
| MZ424863 | Unassigned | Unassigned | Unassigned | 437_0   | Clustered           | 3 VC_437_0   | 3   | 0.107  | 0.99803965 | 0.1068 | 0 | 0 | 0 | 1 Ref      |
| MZ424864 | Unassigned | Unassigned | Unassigned | 113_0   | Clustered           | 91 VC_113_0  | 91  | 0.9584 | 1          | 0.9584 | 0 | 0 | 0 | 1 Ref      |
| MZ424865 | Unassigned | Unassigned | Unassigned | 848_0   | Clustered           | 124 VC_848_0 | 124 | 0.9484 | 1          | 0.9484 | 0 | 0 | 0 | 1 Ref      |
| MZ427930 | Unassigned | Unassigned | Unassigned | 155_15  | Clustered           | 16 VC_155_15 | 16  | 0.0779 | 1          | 0.0779 | 0 | 0 | 0 | 0.8083 Ref |
| MZ428221 | Unassigned | Unassigned | Unassigned | 971_0   | Clustered           | 40 VC_971_0  | 40  | 0.6793 | 1          | 0.6793 | 0 | 0 | 0 | 0.9359 Ref |
| MZ428222 | Unassigned | Unassigned | Unassigned | 972_0   | Clustered           | 99 VC_972_0  | 99  | 0.9113 | 1          | 0.9113 | 0 | 0 | 0 | 0.9928 Ref |
| MZ428223 | Unassigned | Unassigned | Unassigned | 972_0   | Clustered           | 99 VC_972_0  | 99  | 0.9113 | 1          | 0.9113 | 0 | 0 | 0 | 0.9928 Ref |
| MZ428224 | Unassigned | Unassigned | Unassigned | 971_0   | Clustered           | 40 VC_971_0  | 40  | 0.6793 | 1          | 0.6793 | 0 | 0 | 0 | 0.9359 Ref |
| MZ428225 | Unassigned | Unassigned | Unassigned | 972_0   | Clustered           | 99 VC_972_0  | 99  | 0.9113 | 1          | 0.9113 | 0 | 0 | 0 | 0.9928 Ref |
| MZ428226 | Unassigned | Unassigned | Unassigned | 972_0   | Clustered           | 99 VC_972_0  | 99  | 0.9113 | 1          | 0.9113 | 0 | 0 | 0 | 0.9928 Ref |
| MZ428227 | Unassigned | Unassigned | Unassigned | 972_0   | Clustered           | 99 VC_972_0  | 99  | 0.9113 | 1          | 0.9113 | 0 | 0 | 0 | 0.9928 Ref |
| MZ428228 | Unassigned | Unassigned | Unassigned | 972_0   | Clustered           | 99 VC_972_0  | 99  | 0.9113 | 1          | 0.9113 | 0 | 0 | 0 | 0.9928 Ref |
| MZ428229 | Unassigned | Unassigned | Unassigned | 398_0   | Clustered           | 51 VC_398_0  | 51  | 0.8741 | 1          | 0.8741 | 0 | 0 | 0 | 1 Ref      |
| MZ436830 | Unassigned | Unassigned | Unassigned | 290_32  | Clustered/Singleton | 1 VC_290_32  | 1   | 0      | 1          | 0      | 0 | 0 | 0 | 1 Ref      |
| MZ440881 | Unassigned | Unassigned | Unassigned | 474_0   | Clustered           | 19 VC_474_0  | 19  | 0.3729 | 1          | 0.3729 | 0 | 0 | 0 | 1 Ref      |
| MZ443769 | Unassigned | Unassigned | Unassigned | 68_2    | Clustered           | 2 VC_68_2    | 2   | 0.0139 | 0.69357611 | 0.0097 | 0 | 0 | 0 | 1 Ref      |
| MZ443770 | Unassigned | Unassigned | Unassigned | 68_3    | Clustered           | 20 VC_68_3   | 20  | 0.3537 | 1          | 0.3537 | 0 | 0 | 0 | 1 Ref      |
| MZ443771 | Unassigned | Unassigned | Unassigned | 68_3    | Clustered           | 20 VC_68_3   | 20  | 0.3537 | 1          | 0.3537 | 0 | 0 | 0 | 1 Ref      |
| MZ443772 | Unassigned | Unassigned | Unassigned | 68_3    | Clustered           | 20 VC_68_3   | 20  | 0.3537 | 1          | 0.3537 | 0 | 0 | 0 | 1 Ref      |
| MZ443773 | Unassigned | Unassigned | Unassigned | 68_3    | Clustered           | 20 VC_68_3   | 20  | 0.3537 | 1          | 0.3537 | 0 | 0 | 0 | 1 Ref      |
| MZ443774 | Unassigned | Unassigned | Unassigned | 68_3    | Clustered           | 20 VC_68_3   | 20  | 0.3537 | 1          | 0.3537 | 0 | 0 | 0 | 1 Ref      |
| MZ443776 | Unassigned | Unassigned | Unassigned | 68_3    | Clustered           | 20 VC_68_3   | 20  | 0.3537 | 1          | 0.3537 | 0 | 0 | 0 | 1 Ref      |
| MZ443777 | Unassigned | Unassigned | Unassigned | 68_3    | Clustered           | 20 VC_68_3   | 20  | 0.3537 | 1          | 0.3537 | 0 | 0 | 0 | 1 Ref      |
| MZ443778 | Unassigned | Unassigned | Unassigned | 68_3    | Clustered           | 20 VC_68_3   | 20  | 0.3537 | 1          | 0.3537 | 0 | 0 | 0 | 1 Ref      |
| MZ443779 | Unassigned | Unassigned | Unassigned | 68_3    | Clustered           | 20 VC_68_3   | 20  | 0.3537 | 1          | 0.3537 | 0 | 0 | 0 | 1 Ref      |
| MZ443780 | Unassigned | Unassigned | Unassigned | 68_3    | Clustered           | 20 VC_68_3   | 20  | 0.3537 | 1          | 0.3537 | 0 | 0 | 0 | 1 Ref      |
| MZ443782 | Unassigned | Unassigned | Unassigned | 68_3    | Clustered           | 20 VC_68_3   | 20  | 0.3537 | 1          | 0.3537 | 0 | 0 | 0 | 1 Ref      |
| MZ443783 | Unassigned | Unassigned | Unassigned | 68_3    | Clustered           | 20 VC_68_3   | 20  | 0.3537 | 1          | 0.3537 | 0 | 0 | 0 | 1 Ref      |
| MZ443784 | Unassigned | Unassigned | Unassigned | 68_3    | Clustered           | 20 VC_68_3   | 20  | 0.3537 | 1          | 0.3537 | 0 | 0 | 0 | 1 Ref      |
| MZ443785 | Unassigned | Unassigned | Unassigned | 68_3    | Clustered           | 20 VC_68_3   | 20  | 0.3537 | 1          | 0.3537 | 0 | 0 | 0 | 1 Ref      |
| MZ443786 | Unassigned | Unassigned | Unassigned | 68_3    | Clustered           | 20 VC_68_3   | 20  | 0.3537 | 1          | 0.3537 | 0 | 0 | 0 | 1 Ref      |
| MZ443787 | Unassigned | Unassigned | Unassigned | 68_3    | Clustered           | 20 VC_68_3   | 20  | 0.3537 | 1          | 0.3537 | 0 | 0 | 0 | 1 Ref      |



|          |            |            |            |         |                     |              |     |        |            |        |   |   |   |            |
|----------|------------|------------|------------|---------|---------------------|--------------|-----|--------|------------|--------|---|---|---|------------|
| MZ443788 | Unassigned | Unassigned | Unassigned | 68_3    | Clustered           | 20 VC_68_3   | 20  | 0.3537 | 1          | 0.3537 | 0 | 0 | 0 | 1 Ref      |
| MZ443789 | Unassigned | Unassigned | Unassigned | 68_3    | Clustered           | 20 VC_68_3   | 20  | 0.3537 | 1          | 0.3537 | 0 | 0 | 0 | 1 Ref      |
| MZ444140 | Unassigned | Unassigned | Unassigned | 356_0   | Clustered           | 21 VC_356_0  | 21  | 0.5409 | 1          | 0.5409 | 0 | 0 | 0 | 1 Ref      |
| MZ447863 | Unassigned | Unassigned | Unassigned | 1538_0  | Clustered           | 2 VC_1538_0  | 2   | 1      | 1          | 1      | 0 | 0 | 0 | 1 Ref      |
| MZ456034 | Unassigned | Unassigned | Unassigned | 230_0   | Clustered           | 38 VC_230_0  | 38  | 0.9076 | 1          | 0.9076 | 0 | 0 | 0 | 1 Ref      |
| MZ456035 | Unassigned | Unassigned | Unassigned | 881_0   | Clustered           | 7 VC_881_0   | 7   | 0.3448 | 1          | 0.3448 | 0 | 0 | 0 | 1 Ref      |
| MZ456036 | Unassigned | Unassigned | Unassigned | 526_0   | Clustered           | 32 VC_526_0  | 32  | 0.9037 | 1          | 0.9037 | 0 | 0 | 0 | 1 Ref      |
| MZ456037 | Unassigned | Unassigned | Unassigned | 1411_0  | Clustered           | 5 VC_1411_0  | 5   | 0.5446 | 0.99999985 | 0.5446 | 0 | 0 | 0 | 1 Ref      |
| MZ462995 | Unassigned | Unassigned | Unassigned | 1020_0  | Clustered           | 22 VC_1020_0 | 22  | 0.895  | 1          | 0.895  | 0 | 0 | 0 | 1 Ref      |
| MZ474488 | Unassigned | Unassigned | Unassigned | 1539_0  | Clustered           | 2 VC_1539_0  | 2   | 1      | 1          | 1      | 0 | 0 | 0 | 1 Ref      |
| MZ474489 | Unassigned | Unassigned | Unassigned | 1539_0  | Clustered           | 2 VC_1539_0  | 2   | 1      | 1          | 1      | 0 | 0 | 0 | 1 Ref      |
| MZ475891 | Unassigned | Unassigned | Unassigned | 68_1    | Clustered           | 8 VC_68_1    | 8   | 0.1065 | 0.99893246 | 0.1064 | 0 | 0 | 0 | 1 Ref      |
| MZ475892 | Unassigned | Unassigned | Unassigned | 68_1    | Clustered           | 8 VC_68_1    | 8   | 0.1065 | 0.99893246 | 0.1064 | 0 | 0 | 0 | 1 Ref      |
| MZ475893 | Unassigned | Unassigned | Unassigned | 68_1    | Clustered           | 8 VC_68_1    | 8   | 0.1065 | 0.99893246 | 0.1064 | 0 | 0 | 0 | 1 Ref      |
| MZ475894 | Unassigned | Unassigned | Unassigned | 68_1    | Clustered           | 8 VC_68_1    | 8   | 0.1065 | 0.99893246 | 0.1064 | 0 | 0 | 0 | 1 Ref      |
| MZ475895 | Unassigned | Unassigned | Unassigned | 68_1    | Clustered           | 8 VC_68_1    | 8   | 0.1065 | 0.99893246 | 0.1064 | 0 | 0 | 0 | 1 Ref      |
| MZ475896 | Unassigned | Unassigned | Unassigned | 68_1    | Clustered           | 8 VC_68_1    | 8   | 0.1065 | 0.99893246 | 0.1064 | 0 | 0 | 0 | 1 Ref      |
| MZ475897 | Unassigned | Unassigned | Unassigned | 68_1    | Clustered           | 8 VC_68_1    | 8   | 0.1065 | 0.99893246 | 0.1064 | 0 | 0 | 0 | 1 Ref      |
| MZ475898 | Unassigned | Unassigned | Unassigned | 68_1    | Clustered           | 8 VC_68_1    | 8   | 0.1065 | 0.99893246 | 0.1064 | 0 | 0 | 0 | 1 Ref      |
| MZ477002 | Unassigned | Unassigned | Unassigned | 716_0   | Clustered           | 2 VC_716_0   | 2   | 0.1472 | 0.95249915 | 0.1402 | 0 | 0 | 0 | 1 Ref      |
| MZ489634 | Unassigned | Unassigned | Unassigned | 475_0   | Clustered           | 96 VC_475_0  | 96  | 0.9303 | 1          | 0.9303 | 0 | 0 | 0 | 0.9575 Ref |
| MZ496293 | Unassigned | Unassigned | Unassigned | 238_0   | Clustered           | 3 VC_238_0   | 3   | 0.2285 | 0.99828147 | 0.2281 | 0 | 0 | 0 | 1 Ref      |
| MZ501046 | Unassigned | Unassigned | Unassigned | 290_41  | Clustered/Singleton | 1 VC_290_41  | 1   | 0      | 1          | 0      | 0 | 0 | 0 | 1 Ref      |
| MZ501047 | Unassigned | Unassigned | Unassigned | 293_0   | Clustered           | 2 VC_293_0   | 2   | 0.0073 | 0.77582507 | 0.0057 | 0 | 0 | 0 | 1 Ref      |
| MZ501048 | Unassigned | Unassigned | Unassigned | 794_11  | Clustered           | 6 VC_794_11  | 6   | 0.0305 | 0.83830784 | 0.0256 | 0 | 0 | 0 | 0.8 Ref    |
| MZ501049 | Unassigned | Unassigned | Unassigned | 801_0   | Clustered           | 37 VC_801_0  | 37  | 0.5672 | 1          | 0.5672 | 0 | 0 | 0 | 1 Ref      |
| MZ501050 | Unassigned | Unassigned | Unassigned | 290_42  | Clustered/Singleton | 1 VC_290_42  | 1   | 0      | 1          | 0      | 0 | 0 | 0 | 1 Ref      |
| MZ501051 | Unassigned | Unassigned | Unassigned | 470_0   | Clustered           | 62 VC_470_0  | 62  | 0.902  | 1          | 0.902  | 0 | 0 | 0 | 1 Ref      |
| MZ501052 | Unassigned | Unassigned | Unassigned | 290_9   | Clustered/Singleton | 1 VC_290_9   | 1   | 0      | 1          | 0      | 0 | 0 | 0 | 1 Ref      |
| MZ501053 | Unassigned | Unassigned | Unassigned | 596_0   | Clustered           | 4 VC_596_0   | 4   | 0.0604 | 0.99998766 | 0.0604 | 0 | 0 | 0 | 1 Ref      |
| MZ501054 | Unassigned | Unassigned | Unassigned | 794_19  | Clustered           | 16 VC_794_19 | 16  | 0.0975 | 0.99616626 | 0.0971 | 0 | 0 | 0 | 0.8083 Ref |
| MZ501055 | Unassigned | Unassigned | Unassigned | 399_0   | Clustered           | 49 VC_399_0  | 49  | 0.7927 | 1          | 0.7927 | 0 | 0 | 0 | 1 Ref      |
| MZ501056 | Unassigned | Unassigned | Unassigned | 293_10  | Clustered           | 9 VC_293_10  | 9   | 0.0615 | 0.99999884 | 0.0615 | 0 | 0 | 0 | 0.6667 Ref |
| MZ501057 | Unassigned | Unassigned | Unassigned | 737_0   | Clustered           | 13 VC_737_0  | 13  | 0.5083 | 1          | 0.5083 | 0 | 0 | 0 | 1 Ref      |
| MZ501058 | Unassigned | Unassigned | Unassigned | 198_32  | Clustered/Singleton | 1 VC_198_32  | 1   | 0      | 1          | 0      | 0 | 0 | 0 | 1 Ref      |
| MZ501059 | Unassigned | Unassigned | Unassigned | 603_0   | Clustered           | 28 VC_603_0  | 28  | 0.7692 | 1          | 0.7692 | 0 | 0 | 0 | 1 Ref      |
| MZ501060 | Unassigned | Unassigned | Unassigned | 794_2   | Clustered/Singleton | 1 VC_794_2   | 1   | 0      | 1          | 0      | 0 | 0 | 0 | 1 Ref      |
| MZ501061 | Unassigned | Unassigned | Unassigned | 794_18  | Clustered/Singleton | 1 VC_794_18  | 1   | 0      | 1          | 0      | 0 | 0 | 0 | 1 Ref      |
| MZ501062 | Unassigned | Unassigned | Unassigned | 794_19  | Clustered           | 16 VC_794_19 | 16  | 0.0975 | 0.99616626 | 0.0971 | 0 | 0 | 0 | 0.8083 Ref |
| MZ501063 | Unassigned | Unassigned | Unassigned | 872_0   | Clustered           | 28 VC_872_0  | 28  | 0.7887 | 1          | 0.7887 | 0 | 0 | 0 | 1 Ref      |
| MZ501064 | Unassigned | Unassigned | Unassigned | 399_0   | Clustered           | 49 VC_399_0  | 49  | 0.7927 | 1          | 0.7927 | 0 | 0 | 0 | 1 Ref      |
| MZ501065 | Unassigned | Unassigned | Unassigned | 290_36  | Clustered/Singleton | 1 VC_290_36  | 1   | 0      | 1          | 0      | 0 | 0 | 0 | 1 Ref      |
| MZ501066 | Unassigned | Unassigned | Unassigned | 290_46  | Clustered/Singleton | 1 VC_290_46  | 1   | 0      | 1          | 0      | 0 | 0 | 0 | 1 Ref      |
| MZ501067 | Unassigned | Unassigned | Unassigned | 290_47  | Clustered/Singleton | 1 VC_290_47  | 1   | 0      | 1          | 0      | 0 | 0 | 0 | 1 Ref      |
| MZ501068 | Unassigned | Unassigned | Unassigned | 737_0   | Clustered           | 13 VC_737_0  | 13  | 0.5083 | 1          | 0.5083 | 0 | 0 | 0 | 1 Ref      |
| MZ501069 | Unassigned | Unassigned | Unassigned | 976_0   | Clustered           | 36 VC_976_0  | 36  | 0.7833 | 1          | 0.7833 | 0 | 0 | 0 | 1 Ref      |
| MZ501070 | Unassigned | Unassigned | Unassigned | 859_0   | Clustered           | 67 VC_859_0  | 67  | 0.9622 | 1          | 0.9622 | 0 | 0 | 0 | 1 Ref      |
| MZ501071 | Unassigned | Unassigned | Unassigned | 819_0   | Clustered           | 19 VC_819_0  | 19  | 0.6835 | 1          | 0.6835 | 0 | 0 | 0 | 1 Ref      |
| MZ501072 | Unassigned | Unassigned | Unassigned | 199_18  | Clustered           | 2 VC_199_18  | 2   | 0.0057 | 0.91687119 | 0.0052 | 0 | 0 | 0 | 0 Ref      |
| MZ501073 | Unassigned | Unassigned | Unassigned | 794_17  | Clustered           | 2 VC_794_17  | 2   | 0.0059 | 0.57025912 | 0.0034 | 0 | 0 | 0 | 1 Ref      |
| MZ501074 | Unassigned | Unassigned | Unassigned | 198_6   | Clustered/Singleton | 1 VC_198_6   | 1   | 0      | 1          | 0      | 0 | 0 | 0 | 1 Ref      |
| MZ501075 | Unassigned | Unassigned | Unassigned | 198_19  | Clustered/Singleton | 1 VC_198_19  | 1   | 0      | 1          | 0      | 0 | 0 | 0 | 1 Ref      |
| MZ501076 | Unassigned | Unassigned | Unassigned | 199_21  | Clustered/Singleton | 1 VC_199_21  | 1   | 0      | 1          | 0      | 0 | 0 | 0 | 1 Ref      |
| MZ501077 | Unassigned | Unassigned | Unassigned | 604_0   | Clustered           | 4 VC_604_0   | 4   | 0.0531 | 0.99998755 | 0.0531 | 0 | 0 | 0 | 1 Ref      |
| MZ501078 | Unassigned | Unassigned | Unassigned | 405_0   | Clustered           | 126 VC_405_0 | 126 | 0.9614 | 1          | 0.9614 | 0 | 0 | 0 | 1 Ref      |
| MZ501079 | Unassigned | Unassigned | Unassigned | 975_0   | Clustered           | 40 VC_975_0  | 40  | 0.6888 | 1          | 0.6888 | 0 | 0 | 0 | 1 Ref      |
| MZ501080 | Unassigned | Unassigned | Unassigned | 470_0   | Clustered           | 62 VC_470_0  | 62  | 0.902  | 1          | 0.902  | 0 | 0 | 0 | 1 Ref      |
| MZ501081 | Unassigned | Unassigned | Unassigned | 405_0   | Clustered           | 126 VC_405_0 | 126 | 0.9614 | 1          | 0.9614 | 0 | 0 | 0 | 1 Ref      |
| MZ501082 | Unassigned | Unassigned | Unassigned | 794_10  | Clustered           | 8 VC_794_10  | 8   | 0.0433 | 0.9088183  | 0.0394 | 0 | 0 | 0 | 0.9286 Ref |
| MZ501083 | Unassigned | Unassigned | Unassigned | 794_10  | Clustered           | 8 VC_794_10  | 8   | 0.0433 | 0.9088183  | 0.0394 | 0 | 0 | 0 | 0.9286 Ref |
| MZ501084 | Unassigned | Unassigned | Unassigned | 872_0   | Clustered           | 28 VC_872_0  | 28  | 0.7887 | 1          | 0.7887 | 0 | 0 | 0 | 1 Ref      |
| MZ501085 | Unassigned | Unassigned | Unassigned | 604_0   | Clustered           | 4 VC_604_0   | 4   | 0.0531 | 0.99998755 | 0.0531 | 0 | 0 | 0 | 1 Ref      |
| MZ501086 | Unassigned | Unassigned | Unassigned | 340_3   | Clustered           | 24 VC_340_3  | 24  | 0.1205 | 1          | 0.1205 | 0 | 0 | 0 | 0.7283 Ref |
| MZ501087 | Unassigned | Unassigned | Unassigned | 470_0   | Clustered           | 62 VC_470_0  | 62  | 0.902  | 1          | 0.902  | 0 | 0 | 0 | 1 Ref      |
| MZ501088 | Unassigned | Unassigned | Unassigned | 859_0   | Clustered           | 67 VC_859_0  | 67  | 0.9622 | 1          | 0.9622 | 0 | 0 | 0 | 1 Ref      |
| MZ501089 | Unassigned | Unassigned | Unassigned | 290_116 | Clustered/Singleton | 1 VC_290_116 | 1   | 0      | 1          | 0      | 0 | 0 | 0 | 1 Ref      |
| MZ501090 | Unassigned | Unassigned | Unassigned | 975_0   | Clustered           | 40 VC_975_0  | 40  | 0.6888 | 1          | 0.6888 | 0 | 0 | 0 | 1 Ref      |
| MZ501091 | Unassigned | Unassigned | Unassigned | 819_0   | Clustered           | 19 VC_819_0  | 19  | 0.6835 | 1          | 0.6835 | 0 | 0 | 0 | 1 Ref      |
| MZ501092 | Unassigned | Unassigned | Unassigned | 595_0   | Clustered           | 35 VC_595_0  | 35  | 0.8809 | 1          | 0.8809 | 0 | 0 | 0 | 1 Ref      |
| MZ501093 | Unassigned | Unassigned | Unassigned | 794_3   | Clustered/Singleton | 1 VC_794_3   | 1   | 0      | 1          | 0      | 0 | 0 | 0 | 1 Ref      |
| MZ501094 | Unassigned | Unassigned | Unassigned | 794_11  | Clustered           | 6 VC_794_11  | 6   | 0.0305 | 0.83830784 | 0.0256 | 0 | 0 | 0 | 0.8 Ref    |
| MZ501095 | Unassigned | Unassigned | Unassigned | 859_0   | Clustered           | 67 VC_859_0  | 67  | 0.9622 | 1          | 0.9622 | 0 | 0 | 0 | 1 Ref      |
| MZ501096 | Unassigned | Unassigned | Unassigned | 290_147 | Clustered/Singleton | 1 VC_290_147 | 1   | 0      | 1          | 0      | 0 | 0 | 0 | 1 Ref      |
| MZ501097 | Unassigned | Unassigned | Unassigned | 859_0   | Clustered           | 67 VC_859_0  | 67  | 0.9622 | 1          | 0.9622 | 0 | 0 | 0 | 1 Ref      |
| MZ501098 | Unassigned | Unassigned | Unassigned | 290_70  | Clustered/Singleton | 1 VC_290_70  | 1   | 0      | 1          | 0      | 0 | 0 | 0 | 1 Ref      |
| MZ501099 | Unassigned | Unassigned | Unassigned | 604_1   | Clustered           | 3 VC_604_1   | 3   | 0.0311 | 0.99857668 | 0.0311 | 0 | 0 | 0 | 1 Ref      |
| MZ501100 | Unassigned | Unassigned | Unassigned | 872_0   | Clustered           | 28 VC_872_0  | 28  | 0.7887 | 1          | 0.7887 | 0 | 0 | 0 | 1 Ref      |
| MZ501101 | Unassigned | Unassigned | Unassigned | 976_0   | Clustered           | 36 VC_976_0  | 36  | 0.7833 | 1          | 0.7833 | 0 | 0 | 0 | 1 Ref      |
| MZ501102 | Unassigned | Unassigned | Unassigned | 794_10  | Clustered           | 8 VC_794_10  | 8   | 0.0433 | 0.9088183  | 0.0394 | 0 | 0 | 0 | 0.9286 Ref |
| MZ501103 | Unassigned | Unassigned | Unassigned | 198_33  | Clustered/Singleton | 1 VC_198_33  | 1   | 0      | 1          | 0      | 0 | 0 | 0 | 1 Ref      |
| MZ501104 | Unassigned | Unassigned | Unassigned | 819_0   | Clustered           | 19 VC_819_0  | 19  | 0.6835 | 1          | 0.6835 | 0 | 0 | 0 | 1 Ref      |



|          |            |            |            |         |                     |              |     |        |            |        |   |   |   |        |     |
|----------|------------|------------|------------|---------|---------------------|--------------|-----|--------|------------|--------|---|---|---|--------|-----|
| MZ501105 | Unassigned | Unassigned | Unassigned | 199_17  | Clustered           | 4 VC_199_17  | 4   | 0.0165 | 0.99893269 | 0.0165 | 0 | 0 | 0 | 0.8333 | Ref |
| MZ501106 | Unassigned | Unassigned | Unassigned | 290_50  | Clustered/Singleton | 1 VC_290_50  | 1   | 0      | 1          | 0      | 0 | 0 | 0 | 1      | Ref |
| MZ501107 | Unassigned | Unassigned | Unassigned | 859_0   | Clustered           | 67 VC_859_0  | 67  | 0.9622 | 1          | 0.9622 | 0 | 0 | 0 | 1      | Ref |
| MZ501108 | Unassigned | Unassigned | Unassigned | 199_28  | Clustered/Singleton | 1 VC_199_28  | 1   | 0      | 1          | 0      | 0 | 0 | 0 | 1      | Ref |
| MZ501109 | Unassigned | Unassigned | Unassigned | 199_2   | Clustered/Singleton | 1 VC_199_2   | 1   | 0      | 1          | 0      | 0 | 0 | 0 | 1      | Ref |
| MZ501110 | Unassigned | Unassigned | Unassigned | 819_0   | Clustered           | 19 VC_819_0  | 19  | 0.6835 | 1          | 0.6835 | 0 | 0 | 0 | 1      | Ref |
| MZ501111 | Unassigned | Unassigned | Unassigned | 794_6   | Clustered           | 3 VC_794_6   | 3   | 0.012  | 0.63979507 | 0.0077 | 0 | 0 | 0 | 1      | Ref |
| MZ501112 | Unassigned | Unassigned | Unassigned | 819_0   | Clustered           | 19 VC_819_0  | 19  | 0.6835 | 1          | 0.6835 | 0 | 0 | 0 | 1      | Ref |
| MZ501113 | Unassigned | Unassigned | Unassigned | 290_118 | Clustered           | 3 VC_290_118 | 3   | 0.0053 | 0.99046899 | 0.0053 | 0 | 0 | 0 | 1      | Ref |
| MZ501260 | Unassigned | Unassigned | Unassigned | 87_3    | Clustered           | 19 VC_87_3   | 19  | 0.3645 | 1          | 0.3645 | 0 | 0 | 0 | 0.807  | Ref |
| MZ501261 | Unassigned | Unassigned | Unassigned | 87_3    | Clustered           | 19 VC_87_3   | 19  | 0.3645 | 1          | 0.3645 | 0 | 0 | 0 | 0.807  | Ref |
| MZ501262 | Unassigned | Unassigned | Unassigned | 87_3    | Clustered           | 19 VC_87_3   | 19  | 0.3645 | 1          | 0.3645 | 0 | 0 | 0 | 0.807  | Ref |
| MZ501263 | Unassigned | Unassigned | Unassigned | 87_3    | Clustered           | 19 VC_87_3   | 19  | 0.3645 | 1          | 0.3645 | 0 | 0 | 0 | 0.807  | Ref |
| MZ501265 | Unassigned | Unassigned | Unassigned | 87_3    | Clustered           | 19 VC_87_3   | 19  | 0.3645 | 1          | 0.3645 | 0 | 0 | 0 | 0.807  | Ref |
| MZ501266 | Unassigned | Unassigned | Unassigned | 766_0   | Clustered           | 40 VC_766_0  | 40  | 0.7511 | 1          | 0.7511 | 0 | 0 | 0 | 1      | Ref |
| MZ501267 | Unassigned | Unassigned | Unassigned | 456_2   | Clustered           | 4 VC_456_2   | 4   | 0.0833 | 0.99988129 | 0.0833 | 0 | 0 | 0 | 0.8333 | Ref |
| MZ501268 | Unassigned | Unassigned | Unassigned | 507_1   | Clustered           | 11 VC_507_1  | 11  | 0.4612 | 1          | 0.4612 | 0 | 0 | 0 | 1      | Ref |
| MZ501269 | Unassigned | Unassigned | Unassigned | 560_0   | Clustered           | 15 VC_560_0  | 15  | 0.2846 | 1          | 0.2846 | 0 | 0 | 0 | 1      | Ref |
| MZ501270 | Unassigned | Unassigned | Unassigned | 47_0    | Clustered           | 12 VC_47_0   | 12  | 0.3571 | 1          | 0.3571 | 0 | 0 | 0 | 1      | Ref |
| MZ501272 | Unassigned | Unassigned | Unassigned | 131_0   | Clustered           | 43 VC_131_0  | 43  | 0.8853 | 1          | 0.8853 | 0 | 0 | 0 | 1      | Ref |
| MZ502379 | Unassigned | Unassigned | Unassigned | 290_1   | Clustered/Singleton | 1 VC_290_1   | 1   | 0      | 1          | 0      | 0 | 0 | 0 | 1      | Ref |
| MZ502380 | Unassigned | Unassigned | Unassigned | 290_164 | Clustered           | 2 VC_290_164 | 2   | 0.003  | 0.93435121 | 0.0028 | 0 | 0 | 0 | 1      | Ref |
| MZ504876 | Unassigned | Unassigned | Unassigned | 609_0   | Clustered           | 27 VC_609_0  | 27  | 0.9943 | 1          | 0.9943 | 0 | 0 | 0 | 1      | Ref |
| MZ504877 | Unassigned | Unassigned | Unassigned | 609_0   | Clustered           | 27 VC_609_0  | 27  | 0.9943 | 1          | 0.9943 | 0 | 0 | 0 | 1      | Ref |
| MZ504878 | Unassigned | Unassigned | Unassigned | 609_0   | Clustered           | 27 VC_609_0  | 27  | 0.9943 | 1          | 0.9943 | 0 | 0 | 0 | 1      | Ref |
| MZ504995 | Unassigned | Unassigned | Unassigned | 125_0   | Clustered           | 23 VC_125_0  | 23  | 0.8163 | 1          | 0.8163 | 0 | 0 | 0 | 1      | Ref |
| MZ514874 | Unassigned | Unassigned | Unassigned | 441_0   | Clustered           | 2 VC_441_0   | 2   | 0.1619 | 0.94573679 | 0.1531 | 0 | 0 | 0 | 1      | Ref |
| MZ516827 | Unassigned | Unassigned | Unassigned | 861_0   | Clustered           | 29 VC_861_0  | 29  | 0.9954 | 1          | 0.9954 | 0 | 0 | 0 | 1      | Ref |
| MZ520832 | Unassigned | Unassigned | Unassigned | 873_1   | Clustered/Singleton | 1 VC_873_1   | 1   | 0      | 1          | 0      | 0 | 0 | 0 | 1      | Ref |
| MZ520833 | Unassigned | Unassigned | Unassigned | 235_0   | Clustered           | 60 VC_235_0  | 60  | 0.9413 | 1          | 0.9413 | 0 | 0 | 0 | 1      | Ref |
| MZ547449 | Unassigned | Unassigned | Unassigned | 191_0   | Clustered           | 2 VC_191_0   | 2   | 0.7873 | 0.93668477 | 0.7375 | 0 | 0 | 0 | 1      | Ref |
| MZ553930 | Unassigned | Unassigned | Unassigned | 80_0    | Clustered           | 64 VC_80_0   | 64  | 0.418  | 1          | 0.418  | 0 | 0 | 0 | 0.7649 | Ref |
| MZ553931 | Unassigned | Unassigned | Unassigned | 434_0   | Clustered           | 45 VC_434_0  | 45  | 0.9479 | 1          | 0.9479 | 0 | 0 | 0 | 1      | Ref |
| MZ560701 | Unassigned | Unassigned | Unassigned | 293_13  | Clustered           | 10 VC_293_13 | 10  | 0.0698 | 0.99999931 | 0.0698 | 0 | 0 | 0 | 0.9556 | Ref |
| MZ560702 | Unassigned | Unassigned | Unassigned | 509_0   | Clustered           | 36 VC_509_0  | 36  | 0.5291 | 1          | 0.5291 | 0 | 0 | 0 | 0.9714 | Ref |
| MZ561532 | Unassigned | Unassigned | Unassigned | 297_5   | Clustered           | 14 VC_297_5  | 14  | 0.141  | 1          | 0.141  | 0 | 0 | 0 | 0.9231 | Ref |
| MZ568826 | Unassigned | Unassigned | Unassigned | 942_0   | Clustered           | 2 VC_942_0   | 2   | 0.9873 | 0.5        | 0.4937 | 0 | 0 | 0 | 1      | Ref |
| MZ568827 | Unassigned | Unassigned | Unassigned | 189_0   | Clustered           | 2 VC_189_0   | 2   | 0.0711 | 0.95489589 | 0.0679 | 0 | 0 | 0 | 1      | Ref |
| MZ568828 | Unassigned | Unassigned | Unassigned | 255_0   | Clustered           | 11 VC_255_0  | 11  | 0.7034 | 1          | 0.7034 | 0 | 0 | 0 | 1      | Ref |
| MZ570151 | Unassigned | Unassigned | Unassigned | 199_24  | Clustered/Singleton | 1 VC_199_24  | 1   | 0      | 1          | 0      | 0 | 0 | 0 | 1      | Ref |
| MZ570263 | Unassigned | Unassigned | Unassigned | 842_0   | Clustered           | 14 VC_842_0  | 14  | 0.6581 | 1          | 0.6581 | 0 | 0 | 0 | 1      | Ref |
| MZ570427 | Unassigned | Unassigned | Unassigned | 1538_0  | Clustered           | 2 VC_1538_0  | 2   | 1      | 1          | 1      | 0 | 0 | 0 | 1      | Ref |
| MZ571827 | Unassigned | Unassigned | Unassigned | 113_0   | Clustered           | 91 VC_113_0  | 91  | 0.9584 | 1          | 0.9584 | 0 | 0 | 0 | 1      | Ref |
| MZ571828 | Unassigned | Unassigned | Unassigned | 200_0   | Clustered           | 15 VC_200_0  | 15  | 0.5004 | 1          | 0.5004 | 0 | 0 | 0 | 1      | Ref |
| MZ571830 | Unassigned | Unassigned | Unassigned | 200_0   | Clustered           | 15 VC_200_0  | 15  | 0.5004 | 1          | 0.5004 | 0 | 0 | 0 | 1      | Ref |
| MZ571831 | Unassigned | Unassigned | Unassigned | 972_0   | Clustered           | 99 VC_972_0  | 99  | 0.9113 | 1          | 0.9113 | 0 | 0 | 0 | 0.9928 | Ref |
| MZ571832 | Unassigned | Unassigned | Unassigned | 848_0   | Clustered           | 124 VC_848_0 | 124 | 0.9484 | 1          | 0.9484 | 0 | 0 | 0 | 1      | Ref |
| MZ571833 | Unassigned | Unassigned | Unassigned | 972_0   | Clustered           | 99 VC_972_0  | 99  | 0.9113 | 1          | 0.9113 | 0 | 0 | 0 | 0.9928 | Ref |
| MZ571834 | Unassigned | Unassigned | Unassigned | 972_0   | Clustered           | 99 VC_972_0  | 99  | 0.9113 | 1          | 0.9113 | 0 | 0 | 0 | 0.9928 | Ref |
| MZ573923 | Unassigned | Unassigned | Unassigned | 155_15  | Clustered           | 16 VC_155_15 | 16  | 0.0779 | 1          | 0.0779 | 0 | 0 | 0 | 0.8083 | Ref |
| MZ573924 | Unassigned | Unassigned | Unassigned | 466_0   | Clustered           | 66 VC_466_0  | 66  | 0.9246 | 1          | 0.9246 | 0 | 0 | 0 | 1      | Ref |
| MZ576217 | Unassigned | Unassigned | Unassigned | 655_0   | Clustered           | 45 VC_655_0  | 45  | 0.7722 | 1          | 0.7722 | 0 | 0 | 0 | 1      | Ref |
| MZ576218 | Unassigned | Unassigned | Unassigned | 655_0   | Clustered           | 45 VC_655_0  | 45  | 0.7722 | 1          | 0.7722 | 0 | 0 | 0 | 1      | Ref |
| MZ577095 | Unassigned | Unassigned | Unassigned | 450_0   | Clustered           | 4 VC_450_0   | 4   | 0.3229 | 0.9999872  | 0.3229 | 0 | 0 | 0 | 1      | Ref |
| MZ577096 | Unassigned | Unassigned | Unassigned | 450_0   | Clustered           | 4 VC_450_0   | 4   | 0.3229 | 0.9999872  | 0.3229 | 0 | 0 | 0 | 1      | Ref |
| MZ577097 | Unassigned | Unassigned | Unassigned | 450_0   | Clustered           | 4 VC_450_0   | 4   | 0.3229 | 0.9999872  | 0.3229 | 0 | 0 | 0 | 1      | Ref |
| MZ577098 | Unassigned | Unassigned | Unassigned | 450_0   | Clustered           | 4 VC_450_0   | 4   | 0.3229 | 0.9999872  | 0.3229 | 0 | 0 | 0 | 1      | Ref |
| MZ592920 | Unassigned | Unassigned | Unassigned | 907_0   | Clustered           | 32 VC_907_0  | 32  | 0.9964 | 1          | 0.9964 | 0 | 0 | 0 | 1      | Ref |
| MZ592921 | Unassigned | Unassigned | Unassigned | 861_0   | Clustered           | 29 VC_861_0  | 29  | 0.9954 | 1          | 0.9954 | 0 | 0 | 0 | 1      | Ref |
| MZ592922 | Unassigned | Unassigned | Unassigned | 911_0   | Clustered           | 20 VC_911_0  | 20  | 0.9915 | 1          | 0.9915 | 0 | 0 | 0 | 1      | Ref |
| MZ593174 | Unassigned | Unassigned | Unassigned | 714_0   | Clustered           | 71 VC_714_0  | 71  | 0.935  | 1          | 0.935  | 0 | 0 | 0 | 1      | Ref |
| MZ593728 | Unassigned | Unassigned | Unassigned | 713_0   | Clustered           | 26 VC_713_0  | 26  | 0.9358 | 1          | 0.9358 | 0 | 0 | 0 | 1      | Ref |
| MZ598487 | Unassigned | Unassigned | Unassigned | 131_0   | Clustered           | 43 VC_131_0  | 43  | 0.8853 | 1          | 0.8853 | 0 | 0 | 0 | 1      | Ref |
| MZ598515 | Unassigned | Unassigned | Unassigned | 971_0   | Clustered           | 40 VC_971_0  | 40  | 0.6793 | 1          | 0.6793 | 0 | 0 | 0 | 0.9359 | Ref |
| MZ602146 | Unassigned | Unassigned | Unassigned | 113_0   | Clustered           | 91 VC_113_0  | 91  | 0.9584 | 1          | 0.9584 | 0 | 0 | 0 | 1      | Ref |
| MZ602147 | Unassigned | Unassigned | Unassigned | 601_3   | Clustered           | 12 VC_601_3  | 12  | 0.2339 | 1          | 0.2339 | 0 | 0 | 0 | 0.8636 | Ref |
| MZ602148 | Unassigned | Unassigned | Unassigned | 509_0   | Clustered           | 36 VC_509_0  | 36  | 0.5291 | 1          | 0.5291 | 0 | 0 | 0 | 0.9714 | Ref |
| MZ605292 | Unassigned | Unassigned | Unassigned | 1070_0  | Clustered           | 3 VC_1070_0  | 3   | 0.7872 | 0.99542416 | 0.7836 | 0 | 0 | 0 | 1      | Ref |
| MZ605293 | Unassigned | Unassigned | Unassigned | 79_0    | Clustered           | 2 VC_79_0    | 2   | 0.0302 | 0.95617387 | 0.0289 | 0 | 0 | 0 | 1      | Ref |
| MZ611865 | Unassigned | Unassigned | Unassigned | 323_0   | Clustered           | 3 VC_323_0   | 3   | 0.7468 | 0.99821656 | 0.7454 | 0 | 0 | 0 | 1      | Ref |
| MZ612130 | Unassigned | Unassigned | Unassigned | 686_0   | Clustered           | 25 VC_686_0  | 25  | 0.5501 | 1          | 0.5501 | 0 | 0 | 0 | 0.96   | Ref |
| MZ618622 | Unassigned | Unassigned | Unassigned | 713_0   | Clustered           | 26 VC_713_0  | 26  | 0.9358 | 1          | 0.9358 | 0 | 0 | 0 | 1      | Ref |
| MZ622157 | Unassigned | Unassigned | Unassigned | 571_6   | Clustered           | 22 VC_571_6  | 22  | 0.1207 | 1          | 0.1207 | 0 | 0 | 0 | 0.8095 | Ref |
| MZ622158 | Unassigned | Unassigned | Unassigned | 571_7   | Clustered           | 28 VC_571_7  | 28  | 0.1651 | 1          | 0.1651 | 0 | 0 | 0 | 0.8519 | Ref |
| MZ622159 | Unassigned | Unassigned | Unassigned | 533_0   | Clustered           | 16 VC_533_0  | 16  | 0.3765 | 1          | 0.3765 | 0 | 0 | 0 | 1      | Ref |
| MZ622160 | Unassigned | Unassigned | Unassigned | 1278_0  | Clustered           | 19 VC_1278_0 | 19  | 1      | 1          | 1      | 0 | 0 | 0 | 1      | Ref |
| MZ622161 | Unassigned | Unassigned | Unassigned | 701_0   | Clustered           | 16 VC_701_0  | 16  | 0.2957 | 1          | 0.2957 | 0 | 0 | 0 | 0.9167 | Ref |
| MZ622162 | Unassigned | Unassigned | Unassigned | 539_0   | Clustered           | 37 VC_539_0  | 37  | 0.911  | 1          | 0.911  | 0 | 0 | 0 | 1      | Ref |
| MZ622163 | Unassigned | Unassigned | Unassigned | 571_7   | Clustered           | 28 VC_571_7  | 28  | 0.1651 | 1          | 0.1651 | 0 | 0 | 0 | 0.8519 | Ref |
| MZ622164 | Unassigned | Unassigned | Unassigned | 1217_0  | Clustered           | 41 VC_1217_0 | 41  | 0.9546 | 1          | 0.9546 | 0 | 0 | 0 | 0.9976 | Ref |
| MZ622165 | Unassigned | Unassigned | Unassigned | 701_0   | Clustered           | 16 VC_701_0  | 16  | 0.2957 | 1          | 0.2957 | 0 | 0 | 0 | 0.9167 | Ref |



|          |            |            |            |         |                     |              |     |        |            |        |   |   |   |            |
|----------|------------|------------|------------|---------|---------------------|--------------|-----|--------|------------|--------|---|---|---|------------|
| MZ622166 | Unassigned | Unassigned | Unassigned | 881_1   | Clustered           | 13 VC_881_1  | 13  | 0.5859 | 1          | 0.5859 | 0 | 0 | 0 | 1 Ref      |
| MZ622167 | Unassigned | Unassigned | Unassigned | 952_0   | Clustered           | 39 VC_952_0  | 39  | 0.9064 | 1          | 0.9064 | 0 | 0 | 0 | 1 Ref      |
| MZ622168 | Unassigned | Unassigned | Unassigned | 898_1   | Clustered           | 27 VC_889_1  | 27  | 0.8894 | 1          | 0.8894 | 0 | 0 | 0 | 1 Ref      |
| MZ622169 | Unassigned | Unassigned | Unassigned | 566_4   | Clustered           | 16 VC_566_4  | 16  | 0.2517 | 0.9999998  | 0.2517 | 0 | 0 | 0 | 0.9417 Ref |
| MZ622170 | Unassigned | Unassigned | Unassigned | 1411_0  | Clustered           | 5 VC_1411_0  | 5   | 0.5446 | 0.99999985 | 0.5446 | 0 | 0 | 0 | 1 Ref      |
| MZ622171 | Unassigned | Unassigned | Unassigned | 223_6   | Clustered           | 42 VC_223_6  | 42  | 0.4717 | 1          | 0.4717 | 0 | 0 | 0 | 0.8351 Ref |
| MZ622172 | Unassigned | Unassigned | Unassigned | 384_19  | Clustered/Singleton | 1 VC_384_19  | 1   | 0      | 1          | 0      | 0 | 0 | 0 | 1 Ref      |
| MZ622173 | Unassigned | Unassigned | Unassigned | 384_16  | Clustered           | 42 VC_384_16 | 42  | 0.134  | 1          | 0.134  | 0 | 0 | 0 | 0.7282 Ref |
| MZ622176 | Unassigned | Unassigned | Unassigned | 231_0   | Clustered           | 19 VC_231_0  | 19  | 0.9378 | 1          | 0.9378 | 0 | 0 | 0 | 1 Ref      |
| MZ622177 | Unassigned | Unassigned | Unassigned | 1219_0  | Clustered           | 24 VC_1219_0 | 24  | 0.9519 | 1          | 0.9519 | 0 | 0 | 0 | 1 Ref      |
| MZ622178 | Unassigned | Unassigned | Unassigned | 789_0   | Clustered           | 34 VC_789_0  | 34  | 0.9167 | 1          | 0.9167 | 0 | 0 | 0 | 1 Ref      |
| MZ622179 | Unassigned | Unassigned | Unassigned | 1415_0  | Clustered           | 31 VC_1415_0 | 31  | 0.8456 | 1          | 0.8456 | 0 | 0 | 0 | 1 Ref      |
| MZ622180 | Unassigned | Unassigned | Unassigned | 1407_0  | Clustered           | 78 VC_1407_0 | 78  | 0.9731 | 1          | 0.9731 | 0 | 0 | 0 | 1 Ref      |
| MZ622181 | Unassigned | Unassigned | Unassigned | 834_0   | Clustered           | 18 VC_834_0  | 18  | 0.9116 | 1          | 0.9116 | 0 | 0 | 0 | 1 Ref      |
| MZ622182 | Unassigned | Unassigned | Unassigned | 223_6   | Clustered           | 42 VC_223_6  | 42  | 0.4717 | 1          | 0.4717 | 0 | 0 | 0 | 0.8351 Ref |
| MZ622183 | Unassigned | Unassigned | Unassigned | 918_0   | Clustered           | 16 VC_918_0  | 16  | 0.2945 | 1          | 0.2945 | 0 | 0 | 0 | 1 Ref      |
| MZ634338 | Unassigned | Unassigned | Unassigned | 113_0   | Clustered           | 91 VC_113_0  | 91  | 0.9584 | 1          | 0.9584 | 0 | 0 | 0 | 1 Ref      |
| MZ634339 | Unassigned | Unassigned | Unassigned | 113_0   | Clustered           | 91 VC_113_0  | 91  | 0.9584 | 1          | 0.9584 | 0 | 0 | 0 | 1 Ref      |
| MZ634340 | Unassigned | Unassigned | Unassigned | 113_0   | Clustered           | 91 VC_113_0  | 91  | 0.9584 | 1          | 0.9584 | 0 | 0 | 0 | 1 Ref      |
| MZ634341 | Unassigned | Unassigned | Unassigned | 134_2   | Clustered           | 17 VC_134_2  | 17  | 0.1715 | 1          | 0.1715 | 0 | 0 | 0 | 0.9853 Ref |
| MZ634342 | Unassigned | Unassigned | Unassigned | 113_0   | Clustered           | 91 VC_113_0  | 91  | 0.9584 | 1          | 0.9584 | 0 | 0 | 0 | 1 Ref      |
| MZ634343 | Unassigned | Unassigned | Unassigned | 113_0   | Clustered           | 91 VC_113_0  | 91  | 0.9584 | 1          | 0.9584 | 0 | 0 | 0 | 1 Ref      |
| MZ634344 | Unassigned | Unassigned | Unassigned | 200_0   | Clustered           | 15 VC_200_0  | 15  | 0.5004 | 1          | 0.5004 | 0 | 0 | 0 | 1 Ref      |
| MZ634345 | Unassigned | Unassigned | Unassigned | 972_0   | Clustered           | 99 VC_972_0  | 99  | 0.9113 | 1          | 0.9113 | 0 | 0 | 0 | 0.9928 Ref |
| MZ634346 | Unassigned | Unassigned | Unassigned | 972_0   | Clustered           | 99 VC_972_0  | 99  | 0.9113 | 1          | 0.9113 | 0 | 0 | 0 | 0.9928 Ref |
| MZ634348 | Unassigned | Unassigned | Unassigned | 971_0   | Clustered           | 40 VC_971_0  | 40  | 0.6793 | 1          | 0.6793 | 0 | 0 | 0 | 0.9359 Ref |
| MZ634350 | Unassigned | Unassigned | Unassigned | 971_0   | Clustered           | 40 VC_971_0  | 40  | 0.6793 | 1          | 0.6793 | 0 | 0 | 0 | 0.9359 Ref |
| MZ634351 | Unassigned | Unassigned | Unassigned | 971_0   | Clustered           | 40 VC_971_0  | 40  | 0.6793 | 1          | 0.6793 | 0 | 0 | 0 | 0.9359 Ref |
| MZ643272 | Unassigned | Unassigned | Unassigned | 159_0   | Clustered           | 25 VC_159_0  | 25  | 0.7699 | 1          | 0.7699 | 0 | 0 | 0 | 1 Ref      |
| MZ648031 | Unassigned | Unassigned | Unassigned | 1407_0  | Clustered           | 78 VC_1407_0 | 78  | 0.9731 | 1          | 0.9731 | 0 | 0 | 0 | 1 Ref      |
| MZ648032 | Unassigned | Unassigned | Unassigned | 1016_0  | Clustered           | 62 VC_1016_0 | 62  | 0.8638 | 1          | 0.8638 | 0 | 0 | 0 | 0.743 Ref  |
| MZ648033 | Unassigned | Unassigned | Unassigned | 885_0   | Clustered           | 9 VC_885_0   | 9   | 0.9403 | 1          | 0.9403 | 0 | 0 | 0 | 1 Ref      |
| MZ648034 | Unassigned | Unassigned | Unassigned | 335_25  | Clustered/Singleton | 1 VC_335_25  | 1   | 0      | 1          | 0      | 0 | 0 | 0 | 1 Ref      |
| MZ648035 | Unassigned | Unassigned | Unassigned | 1415_0  | Clustered           | 31 VC_1415_0 | 31  | 0.8456 | 1          | 0.8456 | 0 | 0 | 0 | 1 Ref      |
| MZ648036 | Unassigned | Unassigned | Unassigned | 885_0   | Clustered           | 9 VC_885_0   | 9   | 0.9403 | 1          | 0.9403 | 0 | 0 | 0 | 1 Ref      |
| MZ648037 | Unassigned | Unassigned | Unassigned | 243_0   | Clustered           | 72 VC_243_0  | 72  | 0.8089 | 1          | 0.8089 | 0 | 0 | 0 | 1 Ref      |
| MZ648038 | Unassigned | Unassigned | Unassigned | 384_11  | Clustered           | 31 VC_384_11 | 31  | 0.0926 | 1          | 0.0926 | 0 | 0 | 0 | 0.7011 Ref |
| MZ648039 | Unassigned | Unassigned | Unassigned | 1016_0  | Clustered           | 62 VC_1016_0 | 62  | 0.8638 | 1          | 0.8638 | 0 | 0 | 0 | 0.743 Ref  |
| MZ648040 | Unassigned | Unassigned | Unassigned | 1016_0  | Clustered           | 62 VC_1016_0 | 62  | 0.8638 | 1          | 0.8638 | 0 | 0 | 0 | 0.743 Ref  |
| MZ648041 | Unassigned | Unassigned | Unassigned | 384_8   | Clustered/Singleton | 1 VC_384_8   | 1   | 0      | 1          | 0      | 0 | 0 | 0 | 1 Ref      |
| MZ648214 | Unassigned | Unassigned | Unassigned | 837_1   | Clustered           | 24 VC_837_1  | 24  | 0.5328 | 1          | 0.5328 | 0 | 0 | 0 | 1 Ref      |
| MZ648215 | Unassigned | Unassigned | Unassigned | 465_0   | Clustered           | 80 VC_465_0  | 80  | 0.9988 | 1          | 0.9988 | 0 | 1 | 0 | 1 Ref      |
| MZ666965 | Unassigned | Unassigned | Unassigned | 76_0    | Clustered           | 2 VC_76_0    | 2   | 0.0558 | 0.95630925 | 0.0554 | 0 | 0 | 0 | 1 Ref      |
| MZ666966 | Unassigned | Unassigned | Unassigned | 76_0    | Clustered           | 2 VC_76_0    | 2   | 0.0558 | 0.95630925 | 0.0554 | 0 | 0 | 0 | 1 Ref      |
| MZ675741 | Unassigned | Unassigned | Unassigned | 441_1   | Clustered           | 8 VC_441_1   | 8   | 0.5443 | 1          | 0.5443 | 0 | 0 | 0 | 0.9643 Ref |
| MZ681505 | Unassigned | Unassigned | Unassigned | 571_6   | Clustered           | 22 VC_571_6  | 22  | 0.1207 | 1          | 0.1207 | 0 | 0 | 0 | 0.8095 Ref |
| MZ681506 | Unassigned | Unassigned | Unassigned | 1250_0  | Clustered           | 29 VC_1250_0 | 29  | 0.822  | 1          | 0.822  | 0 | 0 | 0 | 1 Ref      |
| MZ681507 | Unassigned | Unassigned | Unassigned | 423_0   | Clustered           | 7 VC_423_0   | 7   | 0.7874 | 1          | 0.7874 | 0 | 0 | 0 | 1 Ref      |
| MZ681508 | Unassigned | Unassigned | Unassigned | 231_0   | Clustered           | 19 VC_231_0  | 19  | 0.9378 | 1          | 0.9378 | 0 | 0 | 0 | 1 Ref      |
| MZ681509 | Unassigned | Unassigned | Unassigned | 1216_0  | Clustered           | 22 VC_1216_0 | 22  | 0.4546 | 1          | 0.4546 | 0 | 0 | 0 | 1 Ref      |
| MZ681510 | Unassigned | Unassigned | Unassigned | 1136_0  | Clustered           | 40 VC_1136_0 | 40  | 0.8746 | 1          | 0.8746 | 0 | 0 | 0 | 1 Ref      |
| MZ681511 | Unassigned | Unassigned | Unassigned | 579_20  | Clustered           | 17 VC_579_20 | 17  | 0.0538 | 1          | 0.0538 | 0 | 0 | 0 | 0.9926 Ref |
| MZ681512 | Unassigned | Unassigned | Unassigned | 538_59  | Clustered           | 5 VC_538_59  | 5   | 0.0456 | 0.99999997 | 0.0456 | 0 | 0 | 0 | 1 Ref      |
| MZ681513 | Unassigned | Unassigned | Unassigned | 1406_0  | Clustered           | 21 VC_1406_0 | 21  | 0.9836 | 1          | 0.9836 | 0 | 0 | 0 | 1 Ref      |
| MZ681516 | Unassigned | Unassigned | Unassigned | 230_0   | Clustered           | 38 VC_230_0  | 38  | 0.9076 | 1          | 0.9076 | 0 | 0 | 0 | 1 Ref      |
| MZ681518 | Unassigned | Unassigned | Unassigned | 532_0   | Clustered           | 75 VC_532_0  | 75  | 0.9393 | 1          | 0.9393 | 0 | 0 | 0 | 1 Ref      |
| MZ681519 | Unassigned | Unassigned | Unassigned | 538_31  | Clustered           | 11 VC_538_31 | 11  | 0.0894 | 1          | 0.0894 | 0 | 0 | 0 | 0.6 Ref    |
| MZ681520 | Unassigned | Unassigned | Unassigned | 384_9   | Clustered           | 4 VC_384_9   | 4   | 0.0109 | 0.99997666 | 0.0109 | 0 | 0 | 0 | 0.6667 Ref |
| MZ681930 | Unassigned | Unassigned | Unassigned | 290_155 | Clustered           | 2 VC_290_155 | 2   | 0.0027 | 0.95044426 | 0.0025 | 0 | 0 | 0 | 1 Ref      |
| MZ687409 | Unassigned | Unassigned | Unassigned | 434_0   | Clustered           | 45 VC_434_0  | 45  | 0.9479 | 1          | 0.9479 | 0 | 0 | 0 | 1 Ref      |
| MZ701794 | Unassigned | Unassigned | Unassigned | 115_0   | Clustered           | 9 VC_115_0   | 9   | 0.5166 | 1          | 0.5166 | 0 | 0 | 0 | 1 Ref      |
| MZ707156 | Unassigned | Unassigned | Unassigned | 686_0   | Clustered           | 25 VC_686_0  | 25  | 0.5501 | 1          | 0.5501 | 0 | 0 | 0 | 0.96 Ref   |
| MZ707157 | Unassigned | Unassigned | Unassigned | 686_0   | Clustered           | 25 VC_686_0  | 25  | 0.5501 | 1          | 0.5501 | 0 | 0 | 0 | 0.96 Ref   |
| MZ712044 | Unassigned | Unassigned | Unassigned | 713_0   | Clustered           | 26 VC_713_0  | 26  | 0.9358 | 1          | 0.9358 | 0 | 0 | 0 | 1 Ref      |
| MZ726791 | Unassigned | Unassigned | Unassigned | 340_6   | Clustered           | 3 VC_340_6   | 3   | 0.0106 | 0.99833469 | 0.0106 | 0 | 0 | 0 | 1 Ref      |
| MZ726792 | Unassigned | Unassigned | Unassigned | 340_6   | Clustered           | 3 VC_340_6   | 3   | 0.0106 | 0.99833469 | 0.0106 | 0 | 0 | 0 | 1 Ref      |
| MZ726793 | Unassigned | Unassigned | Unassigned | 871_1   | Clustered           | 26 VC_871_1  | 26  | 0.6303 | 1          | 0.6303 | 0 | 0 | 0 | 0.9815 Ref |
| MZ726794 | Unassigned | Unassigned | Unassigned | 465_0   | Clustered           | 80 VC_465_0  | 80  | 0.9988 | 1          | 0.9988 | 0 | 0 | 0 | 1 Ref      |
| MZ726795 | Unassigned | Unassigned | Unassigned | 290_56  | Clustered/Singleton | 1 VC_290_56  | 1   | 0      | 1          | 0      | 0 | 0 | 0 | 1 Ref      |
| MZ726796 | Unassigned | Unassigned | Unassigned | 475_0   | Clustered           | 96 VC_475_0  | 96  | 0.9303 | 1          | 0.9303 | 0 | 0 | 0 | 0.9575 Ref |
| MZ726797 | Unassigned | Unassigned | Unassigned | 1090_0  | Clustered           | 8 VC_1090_0  | 8   | 0.6377 | 1          | 0.6377 | 0 | 0 | 0 | 1 Ref      |
| MZ727333 | Unassigned | Unassigned | Unassigned | 772_0   | Clustered           | 9 VC_772_0   | 9   | 0.4468 | 1          | 0.4468 | 0 | 0 | 0 | 1 Ref      |
| MZ747508 | Unassigned | Unassigned | Unassigned | 783_0   | Clustered           | 67 VC_783_0  | 67  | 0.8945 | 1          | 0.8945 | 0 | 0 | 0 | 1 Ref      |
| MZ747509 | Unassigned | Unassigned | Unassigned | 535_1   | Clustered           | 108 VC_535_1 | 108 | 0.8479 | 1          | 0.8479 | 0 | 0 | 0 | 0.9955 Ref |
| MZ747510 | Unassigned | Unassigned | Unassigned | 578_1   | Clustered           | 11 VC_578_1  | 11  | 0.4919 | 1          | 0.4919 | 0 | 0 | 0 | 0.7818 Ref |
| MZ747511 | Unassigned | Unassigned | Unassigned | 577_0   | Clustered           | 21 VC_577_0  | 21  | 0.9908 | 1          | 0.9908 | 0 | 0 | 0 | 1 Ref      |
| MZ747512 | Unassigned | Unassigned | Unassigned | 538_86  | Clustered/Singleton | 1 VC_538_86  | 1   | 0      | 1          | 0      | 0 | 0 | 0 | 1 Ref      |
| MZ747513 | Unassigned | Unassigned | Unassigned | 1287_0  | Clustered           | 44 VC_1287_0 | 44  | 1      | 1          | 1      | 0 | 0 | 0 | 1 Ref      |
| MZ747514 | Unassigned | Unassigned | Unassigned | 532_0   | Clustered           | 75 VC_532_0  | 75  | 0.9393 | 1          | 0.9393 | 0 | 0 | 0 | 1 Ref      |
| MZ747515 | Unassigned | Unassigned | Unassigned | 1202_0  | Clustered           | 10 VC_1202_0 | 10  | 0.5679 | 1          | 0.5679 | 0 | 0 | 0 | 1 Ref      |
| MZ747516 | Unassigned | Unassigned | Unassigned | 1250_0  | Clustered           | 29 VC_1250_0 | 29  | 0.822  | 1          | 0.822  | 0 | 0 | 0 | 1 Ref      |



|          |            |            |            |         |                     |              |     |        |            |        |   |   |   |            |
|----------|------------|------------|------------|---------|---------------------|--------------|-----|--------|------------|--------|---|---|---|------------|
| MZ747517 | Unassigned | Unassigned | Unassigned | 228_0   | Clustered           | 22 VC_228_0  | 22  | 0.7411 | 1          | 0.7411 | 0 | 0 | 0 | 1 Ref      |
| MZ747518 | Unassigned | Unassigned | Unassigned | 466_0   | Clustered           | 66 VC_466_0  | 66  | 0.9246 | 1          | 0.9246 | 0 | 0 | 0 | 1 Ref      |
| MZ747519 | Unassigned | Unassigned | Unassigned | 538_65  | Clustered/Singleton | 1 VC_538_65  | 1   | 0      | 1          | 0      | 0 | 0 | 0 | 1 Ref      |
| MZ747520 | Unassigned | Unassigned | Unassigned | 825_0   | Clustered           | 17 VC_825_0  | 17  | 0.8364 | 1          | 0.8364 | 0 | 0 | 0 | 1 Ref      |
| MZ747521 | Unassigned | Unassigned | Unassigned | 228_0   | Clustered           | 22 VC_228_0  | 22  | 0.7411 | 1          | 0.7411 | 0 | 0 | 0 | 1 Ref      |
| MZ747522 | Unassigned | Unassigned | Unassigned | 1118_0  | Clustered           | 4 VC_1118_0  | 4   | 0.1491 | 0.99998427 | 0.1491 | 0 | 0 | 0 | 1 Ref      |
| MZ751040 | Unassigned | Unassigned | Unassigned | 89_0    | Clustered           | 8 VC_89_0    | 8   | 0.5507 | 1          | 0.5507 | 0 | 0 | 0 | 1 Ref      |
| MZ753803 | Unassigned | Unassigned | Unassigned | 290_106 | Clustered/Singleton | 1 VC_290_106 | 1   | 0      | 1          | 0      | 0 | 0 | 0 | 1 Ref      |
| MZ773648 | Unassigned | Unassigned | Unassigned | 857_0   | Clustered           | 16 VC_857_0  | 16  | 0.9317 | 1          | 0.9317 | 0 | 0 | 0 | 1 Ref      |
| MZ773939 | Unassigned | Unassigned | Unassigned | 304_1   | Clustered           | 20 VC_304_1  | 20  | 0.5632 | 1          | 0.5632 | 0 | 0 | 0 | 0.7684 Ref |
| MZ779062 | Unassigned | Unassigned | Unassigned | 738_0   | Clustered           | 9 VC_738_0   | 9   | 0.7116 | 1          | 0.7116 | 0 | 0 | 0 | 1 Ref      |
| MZ779063 | Unassigned | Unassigned | Unassigned | 463_0   | Clustered           | 7 VC_463_0   | 7   | 0.5971 | 1          | 0.5971 | 0 | 0 | 0 | 1 Ref      |
| MZ803112 | Unassigned | Unassigned | Unassigned | 352_0   | Clustered           | 31 VC_352_0  | 31  | 0.9547 | 1          | 0.9547 | 0 | 0 | 0 | 1 Ref      |
| MZ820083 | Unassigned | Unassigned | Unassigned | 1287_0  | Clustered           | 44 VC_1287_0 | 44  | 1      | 1          | 1      | 0 | 0 | 0 | 1 Ref      |
| MZ820085 | Unassigned | Unassigned | Unassigned | 580_1   | Clustered/Singleton | 1 VC_580_1   | 1   | 0      | 1          | 0      | 0 | 0 | 0 | 1 Ref      |
| MZ820087 | Unassigned | Unassigned | Unassigned | 1250_0  | Clustered           | 29 VC_1250_0 | 29  | 0.822  | 1          | 0.822  | 0 | 0 | 0 | 1 Ref      |
| MZ820088 | Unassigned | Unassigned | Unassigned | 1016_0  | Clustered           | 62 VC_1016_0 | 62  | 0.8638 | 1          | 0.8638 | 0 | 0 | 0 | 0.743 Ref  |
| MZ820089 | Unassigned | Unassigned | Unassigned | 1139_0  | Clustered           | 5 VC_1139_0  | 5   | 0.8556 | 0.99869977 | 0.8545 | 0 | 0 | 0 | 1 Ref      |
| MZ820090 | Unassigned | Unassigned | Unassigned | 223_6   | Clustered           | 42 VC_223_6  | 42  | 0.4717 | 1          | 0.4717 | 0 | 0 | 0 | 0.8351 Ref |
| MZ820091 | Unassigned | Unassigned | Unassigned | 1016_0  | Clustered           | 62 VC_1016_0 | 62  | 0.8638 | 1          | 0.8638 | 0 | 0 | 0 | 0.743 Ref  |
| MZ820092 | Unassigned | Unassigned | Unassigned | 1016_0  | Clustered           | 62 VC_1016_0 | 62  | 0.8638 | 1          | 0.8638 | 0 | 0 | 0 | 0.743 Ref  |
| MZ820093 | Unassigned | Unassigned | Unassigned | 1115_3  | Clustered           | 6 VC_1115_3  | 6   | 0.1298 | 0.99999994 | 0.1298 | 0 | 0 | 0 | 0.8667 Ref |
| MZ820094 | Unassigned | Unassigned | Unassigned | 1115_3  | Clustered           | 6 VC_1115_3  | 6   | 0.1298 | 0.99999994 | 0.1298 | 0 | 0 | 0 | 0.8667 Ref |
| MZ820095 | Unassigned | Unassigned | Unassigned | 1115_2  | Clustered           | 5 VC_1115_2  | 5   | 0.0998 | 0.99999315 | 0.0998 | 0 | 0 | 0 | 1 Ref      |
| MZ821031 | Unassigned | Unassigned | Unassigned | 1170_0  | Clustered           | 19 VC_1170_0 | 19  | 0.7497 | 1          | 0.7497 | 0 | 0 | 0 | 1 Ref      |
| MZ826344 | Unassigned | Unassigned | Unassigned | 131_0   | Clustered           | 43 VC_131_0  | 43  | 0.8853 | 1          | 0.8853 | 0 | 0 | 0 | 1 Ref      |
| MZ826345 | Unassigned | Unassigned | Unassigned | 131_0   | Clustered           | 43 VC_131_0  | 43  | 0.8853 | 1          | 0.8853 | 0 | 0 | 0 | 1 Ref      |
| MZ826346 | Unassigned | Unassigned | Unassigned | 131_0   | Clustered           | 43 VC_131_0  | 43  | 0.8853 | 1          | 0.8853 | 0 | 0 | 0 | 1 Ref      |
| MZ826347 | Unassigned | Unassigned | Unassigned | 131_0   | Clustered           | 43 VC_131_0  | 43  | 0.8853 | 1          | 0.8853 | 0 | 0 | 0 | 1 Ref      |
| MZ826348 | Unassigned | Unassigned | Unassigned | 131_0   | Clustered           | 43 VC_131_0  | 43  | 0.8853 | 1          | 0.8853 | 0 | 0 | 0 | 1 Ref      |
| MZ826349 | Unassigned | Unassigned | Unassigned | 131_0   | Clustered           | 43 VC_131_0  | 43  | 0.8853 | 1          | 0.8853 | 0 | 0 | 0 | 1 Ref      |
| MZ826350 | Unassigned | Unassigned | Unassigned | 79_5    | Clustered           | 6 VC_79_5    | 6   | 0.1083 | 0.99974986 | 0.1083 | 0 | 0 | 0 | 1 Ref      |
| MZ826351 | Unassigned | Unassigned | Unassigned | 131_0   | Clustered           | 43 VC_131_0  | 43  | 0.8853 | 1          | 0.8853 | 0 | 0 | 0 | 1 Ref      |
| MZ826352 | Unassigned | Unassigned | Unassigned | 131_0   | Clustered           | 43 VC_131_0  | 43  | 0.8853 | 1          | 0.8853 | 0 | 0 | 0 | 1 Ref      |
| MZ826353 | Unassigned | Unassigned | Unassigned | 79_5    | Clustered           | 6 VC_79_5    | 6   | 0.1083 | 0.99974986 | 0.1083 | 0 | 0 | 0 | 1 Ref      |
| MZ826354 | Unassigned | Unassigned | Unassigned | 131_0   | Clustered           | 43 VC_131_0  | 43  | 0.8853 | 1          | 0.8853 | 0 | 0 | 0 | 1 Ref      |
| MZ832314 | Unassigned | Unassigned | Unassigned | 655_0   | Clustered           | 45 VC_655_0  | 45  | 0.7722 | 1          | 0.7722 | 0 | 0 | 0 | 1 Ref      |
| MZ833439 | Unassigned | Unassigned | Unassigned | 405_0   | Clustered           | 126 VC_405_0 | 126 | 0.9614 | 1          | 0.9614 | 0 | 0 | 0 | 1 Ref      |
| MZ836210 | Unassigned | Unassigned | Unassigned | 474_0   | Clustered           | 19 VC_474_0  | 19  | 0.3729 | 1          | 0.3729 | 0 | 0 | 0 | 1 Ref      |
| MZ856343 | Unassigned | Unassigned | Unassigned | 579_42  | Clustered/Singleton | 1 VC_579_42  | 1   | 0      | 1          | 0      | 0 | 0 | 0 | 1 Ref      |
| MZ868638 | Unassigned | Unassigned | Unassigned | 293_13  | Clustered           | 10 VC_293_13 | 10  | 0.0698 | 0.99999931 | 0.0698 | 0 | 0 | 0 | 0.9556 Ref |
| MZ868713 | Unassigned | Unassigned | Unassigned | 79_3    | Clustered           | 11 VC_79_3   | 11  | 0.2561 | 1          | 0.2561 | 0 | 0 | 0 | 1 Ref      |
| MZ868714 | Unassigned | Unassigned | Unassigned | 161_0   | Clustered           | 14 VC_161_0  | 14  | 0.6064 | 1          | 0.6064 | 0 | 0 | 0 | 1 Ref      |
| MZ868715 | Unassigned | Unassigned | Unassigned | 161_0   | Clustered           | 14 VC_161_0  | 14  | 0.6064 | 1          | 0.6064 | 0 | 0 | 0 | 1 Ref      |
| MZ868716 | Unassigned | Unassigned | Unassigned | 161_0   | Clustered           | 14 VC_161_0  | 14  | 0.6064 | 1          | 0.6064 | 0 | 0 | 0 | 1 Ref      |
| MZ868717 | Unassigned | Unassigned | Unassigned | 161_0   | Clustered           | 14 VC_161_0  | 14  | 0.6064 | 1          | 0.6064 | 0 | 0 | 0 | 1 Ref      |
| MZ868718 | Unassigned | Unassigned | Unassigned | 712_0   | Clustered           | 5 VC_712_0   | 5   | 0.828  | 0.99999971 | 0.828  | 0 | 0 | 0 | 1 Ref      |
| MZ868724 | Unassigned | Unassigned | Unassigned | 714_0   | Clustered           | 71 VC_714_0  | 71  | 0.935  | 1          | 0.935  | 0 | 0 | 0 | 1 Ref      |
| MZ868725 | Unassigned | Unassigned | Unassigned | 714_0   | Clustered           | 71 VC_714_0  | 71  | 0.935  | 1          | 0.935  | 0 | 0 | 0 | 1 Ref      |
| MZ868726 | Unassigned | Unassigned | Unassigned | 714_0   | Clustered           | 71 VC_714_0  | 71  | 0.935  | 1          | 0.935  | 0 | 0 | 0 | 1 Ref      |
| MZ890186 | Unassigned | Unassigned | Unassigned | 509_0   | Clustered           | 36 VC_509_0  | 36  | 0.5291 | 1          | 0.5291 | 0 | 0 | 0 | 0.9714 Ref |
| MZ892987 | Unassigned | Unassigned | Unassigned | 312_0   | Clustered           | 12 VC_312_0  | 12  | 0.5719 | 1          | 0.5719 | 0 | 0 | 0 | 0.8485 Ref |
| MZ892988 | Unassigned | Unassigned | Unassigned | 312_0   | Clustered           | 12 VC_312_0  | 12  | 0.5719 | 1          | 0.5719 | 0 | 0 | 0 | 0.8485 Ref |
| MZ892989 | Unassigned | Unassigned | Unassigned | 312_0   | Clustered           | 12 VC_312_0  | 12  | 0.5719 | 1          | 0.5719 | 0 | 0 | 0 | 0.8485 Ref |
| MZ892990 | Unassigned | Unassigned | Unassigned | 312_0   | Clustered           | 12 VC_312_0  | 12  | 0.5719 | 1          | 0.5719 | 0 | 0 | 0 | 0.8485 Ref |
| MZ892991 | Unassigned | Unassigned | Unassigned | 312_0   | Clustered           | 12 VC_312_0  | 12  | 0.5719 | 1          | 0.5719 | 0 | 0 | 0 | 0.8485 Ref |
| MZ892992 | Unassigned | Unassigned | Unassigned | 312_0   | Clustered           | 12 VC_312_0  | 12  | 0.5719 | 1          | 0.5719 | 0 | 0 | 0 | 0.8485 Ref |
| MZ923504 | Unassigned | Unassigned | Unassigned | 883_0   | Clustered           | 5 VC_883_0   | 5   | 0.3514 | 0.99996062 | 0.3514 | 0 | 0 | 0 | 1 Ref      |
| MZ923531 | Unassigned | Unassigned | Unassigned | 465_0   | Clustered           | 80 VC_465_0  | 80  | 0.9988 | 1          | 0.9988 | 0 | 0 | 0 | 1 Ref      |
| MZ926748 | Unassigned | Unassigned | Unassigned | 478_0   | Clustered           | 8 VC_478_0   | 8   | 0.2619 | 1          | 0.2619 | 0 | 0 | 0 | 1 Ref      |
| MZ927745 | Unassigned | Unassigned | Unassigned | 766_0   | Clustered           | 40 VC_766_0  | 40  | 0.7511 | 1          | 0.7511 | 0 | 0 | 0 | 1 Ref      |
| MZ927746 | Unassigned | Unassigned | Unassigned | 766_0   | Clustered           | 40 VC_766_0  | 40  | 0.7511 | 1          | 0.7511 | 0 | 0 | 0 | 1 Ref      |
| MZ936314 | Unassigned | Unassigned | Unassigned | 714_0   | Clustered           | 71 VC_714_0  | 71  | 0.935  | 1          | 0.935  | 0 | 0 | 0 | 1 Ref      |
| MZ936315 | Unassigned | Unassigned | Unassigned | 714_0   | Clustered           | 71 VC_714_0  | 71  | 0.935  | 1          | 0.935  | 0 | 0 | 0 | 1 Ref      |
| MZ936316 | Unassigned | Unassigned | Unassigned | 714_0   | Clustered           | 71 VC_714_0  | 71  | 0.935  | 1          | 0.935  | 0 | 0 | 0 | 1 Ref      |
| MZ955866 | Unassigned | Unassigned | Unassigned | 654_0   | Clustered           | 115 VC_654_0 | 115 | 0.7303 | 1          | 0.7303 | 0 | 0 | 0 | 0.8764 Ref |
| MZ955867 | Unassigned | Unassigned | Unassigned | 862_0   | Clustered           | 29 VC_862_0  | 29  | 0.8594 | 1          | 0.8594 | 0 | 0 | 0 | 1 Ref      |
| MZ955869 | Unassigned | Unassigned | Unassigned | 706_0   | Clustered           | 52 VC_706_0  | 52  | 0.9787 | 1          | 0.9787 | 0 | 0 | 0 | 1 Ref      |
| MZ955870 | Unassigned | Unassigned | Unassigned | 883_0   | Clustered           | 5 VC_883_0   | 5   | 0.3514 | 0.99996062 | 0.3514 | 0 | 0 | 0 | 1 Ref      |
| MZ958744 | Unassigned | Unassigned | Unassigned | 538_8   | Clustered/Singleton | 1 VC_538_8   | 1   | 0      | 1          | 0      | 0 | 0 | 0 | 1 Ref      |
| MZ958745 | Unassigned | Unassigned | Unassigned | 579_22  | Clustered           | 4 VC_579_22  | 4   | 0.0099 | 0.99020449 | 0.0098 | 0 | 0 | 0 | 0.8333 Ref |
| MZ958747 | Unassigned | Unassigned | Unassigned | 245_0   | Clustered           | 17 VC_245_0  | 17  | 0.6081 | 1          | 0.6081 | 0 | 0 | 0 | 1 Ref      |
| MZ958748 | Unassigned | Unassigned | Unassigned | 566_4   | Clustered           | 16 VC_566_4  | 16  | 0.2517 | 0.99999998 | 0.2517 | 0 | 0 | 0 | 0.9417 Ref |
| MZ958749 | Unassigned | Unassigned | Unassigned | 1296_0  | Clustered           | 82 VC_1296_0 | 82  | 0.7938 | 1          | 0.7938 | 0 | 0 | 0 | 1 Ref      |
| MZ958750 | Unassigned | Unassigned | Unassigned | 1114_3  | Clustered           | 16 VC_1114_3 | 16  | 0.2336 | 1          | 0.2336 | 0 | 0 | 0 | 0.9667 Ref |
| MZ967493 | Unassigned | Unassigned | Unassigned | 714_0   | Clustered           | 71 VC_714_0  | 71  | 0.935  | 1          | 0.935  | 0 | 0 | 0 | 1 Ref      |
| MZ969646 | Unassigned | Unassigned | Unassigned | 91_5    | Clustered/Singleton | 1 VC_91_5    | 1   | 0      | 1          | 0      | 0 | 0 | 0 | 1 Ref      |
| MZ995503 | Unassigned | Unassigned | Unassigned | 433_0   | Clustered           | 5 VC_433_0   | 5   | 0.2526 | 0.99999998 | 0.2526 | 0 | 0 | 0 | 1 Ref      |
| MZ995504 | Unassigned | Unassigned | Unassigned | 947_0   | Clustered           | 4 VC_947_0   | 4   | 0.8344 | 0.99992411 | 0.8343 | 0 | 0 | 0 | 1 Ref      |
| MZ995505 | Unassigned | Unassigned | Unassigned | 839_0   | Clustered           | 8 VC_839_0   | 8   | 0.9889 | 1          | 0.9889 | 0 | 0 | 0 | 1 Ref      |
| MZ995506 | Unassigned | Unassigned | Unassigned | 433_0   | Clustered           | 5 VC_433_0   | 5   | 0.2526 | 0.99999998 | 0.2526 | 0 | 0 | 0 | 1 Ref      |



|          |            |            |            |         |                     |              |     |        |            |        |   |   |   |            |
|----------|------------|------------|------------|---------|---------------------|--------------|-----|--------|------------|--------|---|---|---|------------|
| MZ997838 | Unassigned | Unassigned | Unassigned | 655_0   | Clustered           | 45 VC_655_0  | 45  | 0.7722 | 1          | 0.7722 | 0 | 0 | 0 | 1 Ref      |
| MZ997839 | Unassigned | Unassigned | Unassigned | 466_0   | Clustered           | 66 VC_466_0  | 66  | 0.9246 | 1          | 0.9246 | 0 | 0 | 0 | 1 Ref      |
| MZ997840 | Unassigned | Unassigned | Unassigned | 466_0   | Clustered           | 66 VC_466_0  | 66  | 0.9246 | 1          | 0.9246 | 0 | 0 | 0 | 1 Ref      |
| MZ997841 | Unassigned | Unassigned | Unassigned | 466_0   | Clustered           | 66 VC_466_0  | 66  | 0.9246 | 1          | 0.9246 | 0 | 0 | 0 | 1 Ref      |
| OK018184 | Unassigned | Unassigned | Unassigned | 290_165 | Clustered/Singleton | 1 VC_290_165 | 1   | 0      | 1          | 0      | 0 | 0 | 0 | 1 Ref      |
| OK019720 | Unassigned | Unassigned | Unassigned | 605_0   | Clustered           | 3 VC_605_0   | 3   | 0.0492 | 0.99859933 | 0.0491 | 0 | 0 | 0 | 1 Ref      |
| OK040170 | Unassigned | Unassigned | Unassigned | 506_1   | Clustered           | 8 VC_506_1   | 8   | 0.2893 | 1          | 0.2893 | 0 | 0 | 0 | 1 Ref      |
| OK040171 | Unassigned | Unassigned | Unassigned | 79_2    | Clustered/Singleton | 1 VC_79_2    | 1   | 0      | 1          | 0      | 0 | 0 | 0 | 1 Ref      |
| OK040777 | Unassigned | Unassigned | Unassigned | 1250_0  | Clustered           | 29 VC_1250_0 | 29  | 0.822  | 1          | 0.822  | 0 | 0 | 0 | 1 Ref      |
| OK040778 | Unassigned | Unassigned | Unassigned | 243_0   | Clustered           | 72 VC_243_0  | 72  | 0.8089 | 1          | 0.8089 | 0 | 0 | 0 | 1 Ref      |
| OK040779 | Unassigned | Unassigned | Unassigned | 1249_0  | Clustered           | 8 VC_1249_0  | 8   | 0.191  | 1          | 0.191  | 0 | 0 | 0 | 1 Ref      |
| OK040781 | Unassigned | Unassigned | Unassigned | 1407_0  | Clustered           | 78 VC_1407_0 | 78  | 0.9731 | 1          | 0.9731 | 0 | 0 | 0 | 1 Ref      |
| OK040782 | Unassigned | Unassigned | Unassigned | 243_0   | Clustered           | 72 VC_243_0  | 72  | 0.8089 | 1          | 0.8089 | 0 | 0 | 0 | 1 Ref      |
| OK040783 | Unassigned | Unassigned | Unassigned | 1407_0  | Clustered           | 78 VC_1407_0 | 78  | 0.9731 | 1          | 0.9731 | 0 | 0 | 0 | 1 Ref      |
| OK040784 | Unassigned | Unassigned | Unassigned | 243_0   | Clustered           | 72 VC_243_0  | 72  | 0.8089 | 1          | 0.8089 | 0 | 0 | 0 | 1 Ref      |
| OK040785 | Unassigned | Unassigned | Unassigned | 952_0   | Clustered           | 39 VC_952_0  | 39  | 0.9064 | 1          | 0.9064 | 0 | 0 | 0 | 1 Ref      |
| OK040786 | Unassigned | Unassigned | Unassigned | 919_1   | Clustered           | 4 VC_919_1   | 4   | 0.4515 | 0.99998463 | 0.4515 | 0 | 0 | 0 | 1 Ref      |
| OK040788 | Unassigned | Unassigned | Unassigned | 1406_0  | Clustered           | 21 VC_1406_0 | 21  | 0.9836 | 1          | 0.9836 | 0 | 0 | 0 | 1 Ref      |
| OK040789 | Unassigned | Unassigned | Unassigned | 579_50  | Clustered           | 15 VC_579_50 | 15  | 0.0467 | 1          | 0.0467 | 0 | 0 | 0 | 0.9238 Ref |
| OK040790 | Unassigned | Unassigned | Unassigned | 1143_2  | Clustered/Singleton | 1 VC_1143_2  | 1   | 0      | 1          | 0      | 0 | 0 | 0 | 1 Ref      |
| OK040791 | Unassigned | Unassigned | Unassigned | 335_45  | Clustered           | 4 VC_335_45  | 4   | 0.0143 | 0.99998616 | 0.0143 | 0 | 0 | 0 | 0.8333 Ref |
| OK040792 | Unassigned | Unassigned | Unassigned | 1412_0  | Clustered           | 7 VC_1412_0  | 7   | 0.2471 | 1          | 0.2471 | 0 | 0 | 0 | 1 Ref      |
| OK040793 | Unassigned | Unassigned | Unassigned | 1143_1  | Clustered           | 2 VC_1143_1  | 2   | 0.1203 | 0.94673154 | 0.1138 | 0 | 0 | 0 | 1 Ref      |
| OK040794 | Unassigned | Unassigned | Unassigned | 1142_1  | Clustered/Singleton | 1 VC_1142_1  | 1   | 0      | 1          | 0      | 0 | 0 | 0 | 1 Ref      |
| OK040806 | Unassigned | Unassigned | Unassigned | 340_17  | Clustered           | 4 VC_340_17  | 4   | 0.0161 | 0.99996247 | 0.0161 | 0 | 0 | 0 | 1 Ref      |
| OK040807 | Unassigned | Unassigned | Unassigned | 340_17  | Clustered           | 4 VC_340_17  | 4   | 0.0161 | 0.99996247 | 0.0161 | 0 | 0 | 0 | 1 Ref      |
| OK040907 | Unassigned | Unassigned | Unassigned | 290_3   | Clustered           | 3 VC_290_3   | 3   | 0.0055 | 0.99676466 | 0.0054 | 0 | 0 | 0 | 1 Ref      |
| OK041468 | Unassigned | Unassigned | Unassigned | 622_0   | Clustered           | 9 VC_622_0   | 9   | 0.9922 | 0.99999994 | 0.9922 | 0 | 0 | 0 | 1 Ref      |
| OK041469 | Unassigned | Unassigned | Unassigned | 613_0   | Clustered           | 2 VC_613_0   | 2   | 0.0728 | 0.95685859 | 0.0696 | 0 | 0 | 0 | 1 Ref      |
| OK042080 | Unassigned | Unassigned | Unassigned | 405_0   | Clustered           | 126 VC_405_0 | 126 | 0.9614 | 1          | 0.9614 | 0 | 0 | 0 | 1 Ref      |
| OK073976 | Unassigned | Unassigned | Unassigned | 816_0   | Clustered           | 35 VC_816_0  | 35  | 0.9824 | 1          | 0.9824 | 0 | 0 | 0 | 1 Ref      |
| OK076929 | Unassigned | Unassigned | Unassigned | 290_128 | Clustered/Singleton | 1 VC_290_128 | 1   | 0      | 1          | 0      | 0 | 0 | 0 | 1 Ref      |
| OK085710 | Unassigned | Unassigned | Unassigned | 353_0   | Clustered           | 3 VC_353_0   | 3   | 0.2241 | 0.81279277 | 0.1821 | 0 | 0 | 0 | 1 Ref      |
| OK094519 | Unassigned | Unassigned | Unassigned | 132_0   | Clustered           | 19 VC_132_0  | 19  | 0.6051 | 1          | 0.6051 | 0 | 0 | 0 | 1 Ref      |
| OK094665 | Unassigned | Unassigned | Unassigned | 766_0   | Clustered           | 40 VC_766_0  | 40  | 0.7511 | 1          | 0.7511 | 0 | 0 | 0 | 1 Ref      |
| OK094707 | Unassigned | Unassigned | Unassigned | 180_0   | Clustered           | 3 VC_180_0   | 3   | 0.9607 | 0.99333557 | 0.9543 | 0 | 0 | 0 | 1 Ref      |
| OK095358 | Unassigned | Unassigned | Unassigned | 365_0   | Clustered           | 6 VC_365_0   | 6   | 0.5395 | 1          | 0.5395 | 0 | 0 | 0 | 1 Ref      |
| OK108607 | Unassigned | Unassigned | Unassigned | 198_23  | Clustered           | 10 VC_198_23 | 10  | 0.0697 | 1          | 0.0697 | 0 | 0 | 0 | 0.8444 Ref |
| OK108608 | Unassigned | Unassigned | Unassigned | 654_0   | Clustered           | 115 VC_654_0 | 115 | 0.7303 | 1          | 0.7303 | 0 | 0 | 0 | 0.8764 Ref |
| OK108609 | Unassigned | Unassigned | Unassigned | 654_0   | Clustered           | 115 VC_654_0 | 115 | 0.7303 | 1          | 0.7303 | 0 | 0 | 0 | 0.8764 Ref |
| OK129343 | Unassigned | Unassigned | Unassigned | 816_0   | Clustered           | 35 VC_816_0  | 35  | 0.9824 | 1          | 0.9824 | 0 | 0 | 0 | 1 Ref      |
| OK136180 | Unassigned | Unassigned | Unassigned | 601_1   | Clustered           | 3 VC_601_1   | 3   | 0.0614 | 0.99801972 | 0.0613 | 0 | 0 | 0 | 1 Ref      |
| OK136181 | Unassigned | Unassigned | Unassigned | 874_0   | Clustered           | 3 VC_874_0   | 3   | 0.0885 | 0.99847887 | 0.0883 | 0 | 0 | 0 | 1 Ref      |
| OK138555 | Unassigned | Unassigned | Unassigned | 972_0   | Clustered           | 99 VC_972_0  | 99  | 0.9113 | 1          | 0.9113 | 0 | 0 | 0 | 0.9928 Ref |
| OK138556 | Unassigned | Unassigned | Unassigned | 848_0   | Clustered           | 124 VC_848_0 | 124 | 0.9484 | 1          | 0.9484 | 0 | 0 | 0 | 1 Ref      |
| OK143207 | Unassigned | Unassigned | Unassigned | 198_24  | Clustered           | 5 VC_198_24  | 5   | 0.029  | 0.99999995 | 0.029  | 0 | 0 | 0 | 0.7 Ref    |
| OK143508 | Unassigned | Unassigned | Unassigned | 654_0   | Clustered           | 115 VC_654_0 | 115 | 0.7303 | 1          | 0.7303 | 0 | 0 | 0 | 0.8764 Ref |
| OK148439 | Unassigned | Unassigned | Unassigned | 816_0   | Clustered           | 35 VC_816_0  | 35  | 0.9824 | 1          | 0.9824 | 0 | 0 | 0 | 1 Ref      |
| OK148440 | Unassigned | Unassigned | Unassigned | 837_0   | Clustered           | 12 VC_837_0  | 12  | 0.2327 | 1          | 0.2327 | 0 | 0 | 0 | 1 Ref      |
| OK148441 | Unassigned | Unassigned | Unassigned | 290_108 | Clustered/Singleton | 1 VC_290_108 | 1   | 0      | 1          | 0      | 0 | 0 | 0 | 1 Ref      |
| OK149215 | Unassigned | Unassigned | Unassigned | 398_0   | Clustered           | 51 VC_398_0  | 51  | 0.8741 | 1          | 0.8741 | 0 | 0 | 0 | 1 Ref      |
| OK169616 | Unassigned | Unassigned | Unassigned | 654_1   | Clustered           | 27 VC_654_1  | 27  | 0.2571 | 1          | 0.2571 | 0 | 0 | 0 | 0.9858 Ref |
| OK172329 | Unassigned | Unassigned | Unassigned | 777_0   | Clustered           | 3 VC_777_0   | 3   | 0.692  | 0.95335502 | 0.6597 | 0 | 0 | 0 | 1 Ref      |
| OK173051 | Unassigned | Unassigned | Unassigned | 427_0   | Clustered           | 37 VC_427_0  | 37  | 0.5729 | 1          | 0.5729 | 0 | 0 | 0 | 0.9474 Ref |
| OK181858 | Unassigned | Unassigned | Unassigned | 601_1   | Clustered           | 3 VC_601_1   | 3   | 0.0614 | 0.99801972 | 0.0613 | 0 | 0 | 0 | 1 Ref      |
| OK181860 | Unassigned | Unassigned | Unassigned | 874_0   | Clustered           | 3 VC_874_0   | 3   | 0.0885 | 0.99847887 | 0.0883 | 0 | 0 | 0 | 1 Ref      |
| OK181861 | Unassigned | Unassigned | Unassigned | 601_1   | Clustered           | 3 VC_601_1   | 3   | 0.0614 | 0.99801972 | 0.0613 | 0 | 0 | 0 | 1 Ref      |
| OK181862 | Unassigned | Unassigned | Unassigned | 874_0   | Clustered           | 3 VC_874_0   | 3   | 0.0885 | 0.99847887 | 0.0883 | 0 | 0 | 0 | 1 Ref      |
| OK210074 | Unassigned | Unassigned | Unassigned | 465_0   | Clustered           | 80 VC_465_0  | 80  | 0.9988 | 1          | 0.9988 | 0 | 0 | 0 | 1 Ref      |
| OK210075 | Unassigned | Unassigned | Unassigned | 687_4   | Clustered/Singleton | 1 VC_687_4   | 1   | 0      | 1          | 0      | 0 | 0 | 0 | 1 Ref      |
| OK210077 | Unassigned | Unassigned | Unassigned | 872_0   | Clustered           | 28 VC_872_0  | 28  | 0.7887 | 1          | 0.7887 | 0 | 0 | 0 | 1 Ref      |
| OK216879 | Unassigned | Unassigned | Unassigned | 528_0   | Clustered           | 12 VC_528_0  | 12  | 0.3923 | 1          | 0.3923 | 0 | 0 | 0 | 0.9697 Ref |
| OK254197 | Unassigned | Unassigned | Unassigned | 198_23  | Clustered           | 10 VC_198_23 | 10  | 0.0697 | 1          | 0.0697 | 0 | 0 | 0 | 0.8444 Ref |
| OK254198 | Unassigned | Unassigned | Unassigned | 297_1   | Clustered           | 8 VC_297_1   | 8   | 0.0749 | 1          | 0.0749 | 0 | 0 | 0 | 0.8571 Ref |
| OK258138 | Unassigned | Unassigned | Unassigned | 75_0    | Clustered           | 15 VC_75_0   | 15  | 0.518  | 1          | 0.518  | 0 | 0 | 0 | 1 Ref      |
| OK258139 | Unassigned | Unassigned | Unassigned | 79_5    | Clustered           | 6 VC_79_5    | 6   | 0.1083 | 0.99974986 | 0.1083 | 0 | 0 | 0 | 1 Ref      |
| OK258140 | Unassigned | Unassigned | Unassigned | 115_0   | Clustered           | 9 VC_115_0   | 9   | 0.5166 | 1          | 0.5166 | 0 | 0 | 0 | 1 Ref      |
| OK268422 | Unassigned | Unassigned | Unassigned | 1080_0  | Clustered           | 23 VC_1080_0 | 23  | 0.9603 | 1          | 0.9603 | 0 | 0 | 0 | 1 Ref      |
| OK268423 | Unassigned | Unassigned | Unassigned | 1080_0  | Clustered           | 23 VC_1080_0 | 23  | 0.9603 | 1          | 0.9603 | 0 | 0 | 0 | 1 Ref      |
| OK268424 | Unassigned | Unassigned | Unassigned | 1080_0  | Clustered           | 23 VC_1080_0 | 23  | 0.9603 | 1          | 0.9603 | 0 | 0 | 0 | 1 Ref      |
| OK268425 | Unassigned | Unassigned | Unassigned | 1080_0  | Clustered           | 23 VC_1080_0 | 23  | 0.9603 | 1          | 0.9603 | 0 | 0 | 0 | 1 Ref      |
| OK268426 | Unassigned | Unassigned | Unassigned | 1080_0  | Clustered           | 23 VC_1080_0 | 23  | 0.9603 | 1          | 0.9603 | 0 | 0 | 0 | 1 Ref      |
| OK268427 | Unassigned | Unassigned | Unassigned | 1080_0  | Clustered           | 23 VC_1080_0 | 23  | 0.9603 | 1          | 0.9603 | 0 | 0 | 0 | 1 Ref      |
| OK272470 | Unassigned | Unassigned | Unassigned | 872_0   | Clustered           | 28 VC_872_0  | 28  | 0.7887 | 1          | 0.7887 | 0 | 0 | 0 | 1 Ref      |
| OK272471 | Unassigned | Unassigned | Unassigned | 976_0   | Clustered           | 36 VC_976_0  | 36  | 0.7833 | 1          | 0.7833 | 0 | 0 | 0 | 1 Ref      |
| OK272472 | Unassigned | Unassigned | Unassigned | 340_12  | Clustered           | 2 VC_340_12  | 2   | 0.0041 | 0.72605466 | 0.003  | 0 | 0 | 0 | 1 Ref      |
| OK272473 | Unassigned | Unassigned | Unassigned | 290_59  | Clustered/Singleton | 1 VC_290_59  | 1   | 0      | 1          | 0      | 0 | 0 | 0 | 1 Ref      |
| OK272474 | Unassigned | Unassigned | Unassigned | 859_0   | Clustered           | 67 VC_859_0  | 67  | 0.9622 | 1          | 0.9622 | 0 | 0 | 0 | 1 Ref      |
| OK272476 | Unassigned | Unassigned | Unassigned | 290_60  | Clustered/Singleton | 1 VC_290_60  | 1   | 0      | 1          | 0      | 0 | 0 | 0 | 1 Ref      |
| OK272477 | Unassigned | Unassigned | Unassigned | 198_35  | Clustered/Singleton | 1 VC_198_35  | 1   | 0      | 1          | 0      | 0 | 0 | 0 | 1 Ref      |
| OK272478 | Unassigned | Unassigned | Unassigned | 976_0   | Clustered           | 36 VC_976_0  | 36  | 0.7833 | 1          | 0.7833 | 0 | 0 | 0 | 1 Ref      |



|          |            |            |            |         |                     |              |    |        |            |        |   |   |   |            |
|----------|------------|------------|------------|---------|---------------------|--------------|----|--------|------------|--------|---|---|---|------------|
| OK272479 | Unassigned | Unassigned | Unassigned | 975_0   | Clustered           | 40 VC_975_0  | 40 | 0.6888 | 1          | 0.6888 | 0 | 0 | 0 | 1 Ref      |
| OK272480 | Unassigned | Unassigned | Unassigned | 198_16  | Clustered/Singleton | 1 VC_198_16  | 1  | 0      | 1          | 0      | 0 | 0 | 0 | 1 Ref      |
| OK272481 | Unassigned | Unassigned | Unassigned | 976_0   | Clustered           | 36 VC_976_0  | 36 | 0.7833 | 1          | 0.7833 | 0 | 0 | 0 | 1 Ref      |
| OK272482 | Unassigned | Unassigned | Unassigned | 794_19  | Clustered           | 16 VC_794_19 | 16 | 0.0975 | 0.99616626 | 0.0971 | 0 | 0 | 0 | 0.8083 Ref |
| OK272483 | Unassigned | Unassigned | Unassigned | 976_0   | Clustered           | 36 VC_976_0  | 36 | 0.7833 | 1          | 0.7833 | 0 | 0 | 0 | 1 Ref      |
| OK272484 | Unassigned | Unassigned | Unassigned | 290_62  | Clustered/Singleton | 1 VC_290_62  | 1  | 0      | 1          | 0      | 0 | 0 | 0 | 1 Ref      |
| OK272485 | Unassigned | Unassigned | Unassigned | 976_0   | Clustered           | 36 VC_976_0  | 36 | 0.7833 | 1          | 0.7833 | 0 | 0 | 0 | 1 Ref      |
| OK272486 | Unassigned | Unassigned | Unassigned | 976_0   | Clustered           | 36 VC_976_0  | 36 | 0.7833 | 1          | 0.7833 | 0 | 0 | 0 | 1 Ref      |
| OK272487 | Unassigned | Unassigned | Unassigned | 975_0   | Clustered           | 40 VC_975_0  | 40 | 0.6888 | 1          | 0.6888 | 0 | 0 | 0 | 1 Ref      |
| OK272488 | Unassigned | Unassigned | Unassigned | 859_0   | Clustered           | 67 VC_859_0  | 67 | 0.9622 | 1          | 0.9622 | 0 | 0 | 0 | 1 Ref      |
| OK272489 | Unassigned | Unassigned | Unassigned | 976_0   | Clustered           | 36 VC_976_0  | 36 | 0.7833 | 1          | 0.7833 | 0 | 0 | 0 | 1 Ref      |
| OK272490 | Unassigned | Unassigned | Unassigned | 340_3   | Clustered           | 24 VC_340_3  | 24 | 0.1205 | 1          | 0.1205 | 0 | 0 | 0 | 0.7283 Ref |
| OK274152 | Unassigned | Unassigned | Unassigned | 290_122 | Clustered/Singleton | 1 VC_290_122 | 1  | 0      | 1          | 0      | 0 | 0 | 0 | 1 Ref      |
| OK274245 | Unassigned | Unassigned | Unassigned | 84_0    | Clustered           | 6 VC_84_0    | 6  | 0.6364 | 1          | 0.6364 | 0 | 0 | 0 | 1 Ref      |
| OK275491 | Unassigned | Unassigned | Unassigned | 79_5    | Clustered           | 6 VC_79_5    | 6  | 0.1083 | 0.99974986 | 0.1083 | 0 | 0 | 0 | 1 Ref      |
| OK275492 | Unassigned | Unassigned | Unassigned | 175_0   | Clustered           | 20 VC_175_0  | 20 | 0.7504 | 1          | 0.7504 | 0 | 0 | 0 | 1 Ref      |
| OK275493 | Unassigned | Unassigned | Unassigned | 175_0   | Clustered           | 20 VC_175_0  | 20 | 0.7504 | 1          | 0.7504 | 0 | 0 | 0 | 1 Ref      |
| OK275494 | Unassigned | Unassigned | Unassigned | 377_0   | Clustered           | 16 VC_377_0  | 16 | 0.6424 | 1          | 0.6424 | 0 | 0 | 0 | 1 Ref      |
| OK275495 | Unassigned | Unassigned | Unassigned | 75_0    | Clustered           | 15 VC_75_0   | 15 | 0.518  | 1          | 0.518  | 0 | 0 | 0 | 1 Ref      |
| OK275722 | Unassigned | Unassigned | Unassigned | 290_109 | Clustered           | 2 VC_290_109 | 2  | 0.0026 | 0.91436748 | 0.0024 | 0 | 0 | 0 | 1 Ref      |
| OK283618 | Unassigned | Unassigned | Unassigned | 343_0   | Clustered           | 3 VC_343_0   | 3  | 0.0404 | 0.99858753 | 0.0404 | 0 | 0 | 0 | 1 Ref      |
| OK283619 | Unassigned | Unassigned | Unassigned | 135_34  | Clustered           | 3 VC_135_34  | 3  | 0.0102 | 0.97231548 | 0.0099 | 0 | 0 | 0 | 0.6667 Ref |
| OK288022 | Unassigned | Unassigned | Unassigned | 199_19  | Clustered           | 12 VC_199_19 | 12 | 0.0651 | 1          | 0.0651 | 0 | 0 | 0 | 0.8636 Ref |
| OK310502 | Unassigned | Unassigned | Unassigned | 1114_3  | Clustered           | 16 VC_1114_3 | 16 | 0.2336 | 1          | 0.2336 | 0 | 0 | 0 | 0.9667 Ref |
| OK310503 | Unassigned | Unassigned | Unassigned | 1204_0  | Clustered           | 25 VC_1204_0 | 25 | 0.7382 | 1          | 0.7382 | 0 | 0 | 0 | 1 Ref      |
| OK310504 | Unassigned | Unassigned | Unassigned | 1407_0  | Clustered           | 78 VC_1407_0 | 78 | 0.9731 | 1          | 0.9731 | 0 | 0 | 0 | 1 Ref      |
| OK310505 | Unassigned | Unassigned | Unassigned | 243_0   | Clustered           | 72 VC_243_0  | 72 | 0.8089 | 1          | 0.8089 | 0 | 0 | 0 | 1 Ref      |
| OK310506 | Unassigned | Unassigned | Unassigned | 1296_0  | Clustered           | 82 VC_1296_0 | 82 | 0.7938 | 1          | 0.7938 | 0 | 0 | 0 | 1 Ref      |
| OK310512 | Unassigned | Unassigned | Unassigned | 859_0   | Clustered           | 67 VC_859_0  | 67 | 0.9622 | 1          | 0.9622 | 0 | 0 | 0 | 1 Ref      |
| OK310513 | Unassigned | Unassigned | Unassigned | 859_0   | Clustered           | 67 VC_859_0  | 67 | 0.9622 | 1          | 0.9622 | 0 | 0 | 0 | 1 Ref      |
| OK310514 | Unassigned | Unassigned | Unassigned | 859_0   | Clustered           | 67 VC_859_0  | 67 | 0.9622 | 1          | 0.9622 | 0 | 0 | 0 | 1 Ref      |
| OK318957 | Unassigned | Unassigned | Unassigned | 1406_0  | Clustered           | 21 VC_1406_0 | 21 | 0.9836 | 1          | 0.9836 | 0 | 0 | 0 | 1 Ref      |
| OK318958 | Unassigned | Unassigned | Unassigned | 1287_0  | Clustered           | 44 VC_1287_0 | 44 | 1      | 1          | 1      | 0 | 0 | 0 | 1 Ref      |
| OK318959 | Unassigned | Unassigned | Unassigned | 532_0   | Clustered           | 75 VC_532_0  | 75 | 0.9393 | 1          | 0.9393 | 0 | 0 | 0 | 1 Ref      |
| OK318960 | Unassigned | Unassigned | Unassigned | 527_0   | Clustered           | 37 VC_527_0  | 37 | 0.9679 | 1          | 0.9679 | 0 | 0 | 0 | 1 Ref      |
| OK318961 | Unassigned | Unassigned | Unassigned | 1203_0  | Clustered           | 28 VC_1203_0 | 28 | 0.4905 | 1          | 0.4905 | 0 | 0 | 0 | 1 Ref      |
| OK318991 | Unassigned | Unassigned | Unassigned | 84_0    | Clustered           | 6 VC_84_0    | 6  | 0.6364 | 1          | 0.6364 | 0 | 0 | 0 | 1 Ref      |
| OK319016 | Unassigned | Unassigned | Unassigned | 71_0    | Clustered           | 27 VC_71_0   | 27 | 0.5964 | 1          | 0.5964 | 0 | 0 | 0 | 0.9943 Ref |
| OK322699 | Unassigned | Unassigned | Unassigned | 135_22  | Clustered           | 13 VC_135_22 | 13 | 0.0795 | 1          | 0.0795 | 0 | 0 | 0 | 0.8205 Ref |
| OK330455 | Unassigned | Unassigned | Unassigned | 766_0   | Clustered           | 40 VC_766_0  | 40 | 0.7511 | 1          | 0.7511 | 0 | 0 | 0 | 1 Ref      |
| OK330456 | Unassigned | Unassigned | Unassigned | 766_0   | Clustered           | 40 VC_766_0  | 40 | 0.7511 | 1          | 0.7511 | 0 | 0 | 0 | 1 Ref      |
| OK335775 | Unassigned | Unassigned | Unassigned | 297_5   | Clustered           | 14 VC_297_5  | 14 | 0.141  | 1          | 0.141  | 0 | 0 | 0 | 0.9231 Ref |
| OK335783 | Unassigned | Unassigned | Unassigned | 71_0    | Clustered           | 27 VC_71_0   | 27 | 0.5964 | 1          | 0.5964 | 0 | 0 | 0 | 0.9943 Ref |
| OK338687 | Unassigned | Unassigned | Unassigned | 376_0   | Clustered           | 2 VC_376_0   | 2  | 0.8003 | 0.72985431 | 0.5841 | 0 | 0 | 0 | 1 Ref      |
| OK340817 | Unassigned | Unassigned | Unassigned | 1080_0  | Clustered           | 23 VC_1080_0 | 23 | 0.9603 | 1          | 0.9603 | 0 | 0 | 0 | 1 Ref      |
| OK340818 | Unassigned | Unassigned | Unassigned | 1080_0  | Clustered           | 23 VC_1080_0 | 23 | 0.9603 | 1          | 0.9603 | 0 | 0 | 0 | 1 Ref      |
| OK340819 | Unassigned | Unassigned | Unassigned | 1080_0  | Clustered           | 23 VC_1080_0 | 23 | 0.9603 | 1          | 0.9603 | 0 | 0 | 0 | 1 Ref      |
| OK340820 | Unassigned | Unassigned | Unassigned | 1198_0  | Clustered           | 24 VC_1198_0 | 24 | 1      | 1          | 1      | 0 | 0 | 0 | 1 Ref      |
| OK340821 | Unassigned | Unassigned | Unassigned | 1198_0  | Clustered           | 24 VC_1198_0 | 24 | 1      | 1          | 1      | 0 | 0 | 0 | 1 Ref      |
| OK340822 | Unassigned | Unassigned | Unassigned | 1198_0  | Clustered           | 24 VC_1198_0 | 24 | 1      | 1          | 1      | 0 | 0 | 0 | 1 Ref      |
| OK349506 | Unassigned | Unassigned | Unassigned | 861_0   | Clustered           | 29 VC_861_0  | 29 | 0.9954 | 1          | 0.9954 | 0 | 0 | 0 | 1 Ref      |
| OK349510 | Unassigned | Unassigned | Unassigned | 87_4    | Clustered           | 3 VC_87_4    | 3  | 0.0292 | 0.98125255 | 0.0286 | 0 | 0 | 0 | 1 Ref      |
| OK412919 | Unassigned | Unassigned | Unassigned | 1015_1  | Clustered           | 26 VC_1015_1 | 26 | 0.6989 | 1          | 0.6989 | 0 | 0 | 0 | 1 Ref      |
| OK428535 | Unassigned | Unassigned | Unassigned | 994_5   | Clustered           | 19 VC_994_5  | 19 | 0.2622 | 1          | 0.2622 | 0 | 0 | 0 | 1 Ref      |
| OK428602 | Unassigned | Unassigned | Unassigned | 136_0   | Clustered           | 3 VC_136_0   | 3  | 0.0934 | 0.99858535 | 0.0932 | 0 | 0 | 0 | 1 Ref      |
| OK483199 | Unassigned | Unassigned | Unassigned | 935_2   | Clustered           | 7 VC_935_2   | 7  | 0.2837 | 1          | 0.2837 | 0 | 0 | 0 | 1 Ref      |
| OK483201 | Unassigned | Unassigned | Unassigned | 911_0   | Clustered           | 20 VC_911_0  | 20 | 0.9915 | 1          | 0.9915 | 0 | 0 | 0 | 1 Ref      |
| OK483342 | Unassigned | Unassigned | Unassigned | 339_0   | Clustered           | 11 VC_339_0  | 11 | 0.4647 | 1          | 0.4647 | 0 | 0 | 0 | 1 Ref      |
| OK490394 | Unassigned | Unassigned | Unassigned | 236_0   | Clustered           | 32 VC_236_0  | 32 | 0.9115 | 1          | 0.9115 | 0 | 0 | 0 | 1 Ref      |
| OK490395 | Unassigned | Unassigned | Unassigned | 6_0     | Clustered           | 44 VC_6_0    | 44 | 0.9068 | 1          | 0.9068 | 0 | 0 | 0 | 1 Ref      |
| OK490396 | Unassigned | Unassigned | Unassigned | 236_0   | Clustered           | 32 VC_236_0  | 32 | 0.9115 | 1          | 0.9115 | 0 | 0 | 0 | 1 Ref      |
| OK490397 | Unassigned | Unassigned | Unassigned | 6_0     | Clustered           | 44 VC_6_0    | 44 | 0.9068 | 1          | 0.9068 | 0 | 0 | 0 | 1 Ref      |
| OK490398 | Unassigned | Unassigned | Unassigned | 236_0   | Clustered           | 32 VC_236_0  | 32 | 0.9115 | 1          | 0.9115 | 0 | 0 | 0 | 1 Ref      |
| OK490399 | Unassigned | Unassigned | Unassigned | 6_0     | Clustered           | 44 VC_6_0    | 44 | 0.9068 | 1          | 0.9068 | 0 | 0 | 0 | 1 Ref      |
| OK490400 | Unassigned | Unassigned | Unassigned | 236_0   | Clustered           | 32 VC_236_0  | 32 | 0.9115 | 1          | 0.9115 | 0 | 0 | 0 | 1 Ref      |
| OK490401 | Unassigned | Unassigned | Unassigned | 6_0     | Clustered           | 44 VC_6_0    | 44 | 0.9068 | 1          | 0.9068 | 0 | 0 | 0 | 1 Ref      |
| OK490402 | Unassigned | Unassigned | Unassigned | 236_0   | Clustered           | 32 VC_236_0  | 32 | 0.9115 | 1          | 0.9115 | 0 | 0 | 0 | 1 Ref      |
| OK490403 | Unassigned | Unassigned | Unassigned | 6_0     | Clustered           | 44 VC_6_0    | 44 | 0.9068 | 1          | 0.9068 | 0 | 0 | 0 | 1 Ref      |
| OK490404 | Unassigned | Unassigned | Unassigned | 236_0   | Clustered           | 32 VC_236_0  | 32 | 0.9115 | 1          | 0.9115 | 0 | 0 | 0 | 1 Ref      |
| OK490405 | Unassigned | Unassigned | Unassigned | 6_0     | Clustered           | 44 VC_6_0    | 44 | 0.9068 | 1          | 0.9068 | 0 | 0 | 0 | 1 Ref      |
| OK490406 | Unassigned | Unassigned | Unassigned | 236_0   | Clustered           | 32 VC_236_0  | 32 | 0.9115 | 1          | 0.9115 | 0 | 0 | 0 | 1 Ref      |
| OK490407 | Unassigned | Unassigned | Unassigned | 6_0     | Clustered           | 44 VC_6_0    | 44 | 0.9068 | 1          | 0.9068 | 0 | 0 | 0 | 1 Ref      |
| OK490408 | Unassigned | Unassigned | Unassigned | 235_0   | Clustered           | 60 VC_235_0  | 60 | 0.9413 | 1          | 0.9413 | 0 | 0 | 0 | 1 Ref      |
| OK490409 | Unassigned | Unassigned | Unassigned | 190_0   | Clustered           | 2 VC_190_0   | 2  | 0.0361 | 0.95635532 | 0.0345 | 0 | 0 | 0 | 1 Ref      |
| OK490410 | Unassigned | Unassigned | Unassigned | 33_0    | Clustered           | 9 VC_33_0    | 9  | 0.3409 | 1          | 0.3409 | 0 | 0 | 0 | 0.6944 Ref |
| OK490411 | Unassigned | Unassigned | Unassigned | 6_0     | Clustered           | 44 VC_6_0    | 44 | 0.9068 | 1          | 0.9068 | 0 | 0 | 0 | 1 Ref      |
| OK490412 | Unassigned | Unassigned | Unassigned | 236_0   | Clustered           | 32 VC_236_0  | 32 | 0.9115 | 1          | 0.9115 | 0 | 0 | 0 | 1 Ref      |
| OK490413 | Unassigned | Unassigned | Unassigned | 6_0     | Clustered           | 44 VC_6_0    | 44 | 0.9068 | 1          | 0.9068 | 0 | 0 | 0 | 1 Ref      |
| OK490414 | Unassigned | Unassigned | Unassigned | 236_0   | Clustered           | 32 VC_236_0  | 32 | 0.9115 | 1          | 0.9115 | 0 | 0 | 0 | 1 Ref      |
| OK490415 | Unassigned | Unassigned | Unassigned | 33_0    | Clustered           | 9 VC_33_0    | 9  | 0.3409 | 1          | 0.3409 | 0 | 0 | 0 | 0.6944 Ref |
| OK490416 | Unassigned | Unassigned | Unassigned | 33_0    | Clustered           | 9 VC_33_0    | 9  | 0.3409 | 1          | 0.3409 | 0 | 0 | 0 | 0.6944 Ref |



[illegible]



|          |            |            |            |         |                     |              |     |        |            |        |   |   |   |            |
|----------|------------|------------|------------|---------|---------------------|--------------|-----|--------|------------|--------|---|---|---|------------|
| OK523998 | Unassigned | Unassigned | Unassigned | 131_0   | Clustered           | 43 VC_131_0  | 43  | 0.8853 | 1          | 0.8853 | 0 | 0 | 0 | 1 Ref      |
| OK523999 | Unassigned | Unassigned | Unassigned | 131_0   | Clustered           | 43 VC_131_0  | 43  | 0.8853 | 1          | 0.8853 | 0 | 0 | 0 | 1 Ref      |
| OK539620 | Unassigned | Unassigned | Unassigned | 655_0   | Clustered           | 45 VC_655_0  | 45  | 0.7722 | 1          | 0.7722 | 0 | 0 | 0 | 1 Ref      |
| OK539824 | Unassigned | Unassigned | Unassigned | 434_0   | Clustered           | 45 VC_434_0  | 45  | 0.9479 | 1          | 0.9479 | 0 | 0 | 0 | 1 Ref      |
| OK539825 | Unassigned | Unassigned | Unassigned | 766_0   | Clustered           | 40 VC_766_0  | 40  | 0.7511 | 1          | 0.7511 | 0 | 0 | 0 | 1 Ref      |
| OK539826 | Unassigned | Unassigned | Unassigned | 77_0    | Clustered           | 37 VC_77_0   | 37  | 0.9392 | 1          | 0.9392 | 0 | 0 | 0 | 1 Ref      |
| OK539913 | Unassigned | Unassigned | Unassigned | 341_0   | Clustered           | 27 VC_341_0  | 27  | 0.5058 | 1          | 0.5058 | 0 | 0 | 0 | 0.8661 Ref |
| OK546191 | Unassigned | Unassigned | Unassigned | 714_0   | Clustered           | 71 VC_714_0  | 71  | 0.935  | 1          | 0.935  | 0 | 0 | 0 | 1 Ref      |
| OK562429 | Unassigned | Unassigned | Unassigned | 113_0   | Clustered           | 91 VC_113_0  | 91  | 0.9584 | 1          | 0.9584 | 0 | 0 | 0 | 1 Ref      |
| OK570184 | Unassigned | Unassigned | Unassigned | 467_0   | Clustered           | 6 VC_467_0   | 6   | 0.1136 | 1          | 0.1136 | 0 | 0 | 0 | 1 Ref      |
| OK570186 | Unassigned | Unassigned | Unassigned | 870_0   | Clustered           | 2 VC_870_0   | 2   | 0.5991 | 0.92357512 | 0.5533 | 0 | 0 | 0 | 1 Ref      |
| OK570375 | Unassigned | Unassigned | Unassigned | 290_102 | Clustered/Singleton | 1 VC_290_102 | 1   | 0      | 1          | 0      | 0 | 0 | 0 | 1 Ref      |
| OK583892 | Unassigned | Unassigned | Unassigned | 113_0   | Clustered           | 91 VC_113_0  | 91  | 0.9584 | 1          | 0.9584 | 0 | 0 | 0 | 1 Ref      |
| OK583893 | Unassigned | Unassigned | Unassigned | 113_0   | Clustered           | 91 VC_113_0  | 91  | 0.9584 | 1          | 0.9584 | 0 | 0 | 0 | 1 Ref      |
| OK585158 | Unassigned | Unassigned | Unassigned | 861_0   | Clustered           | 29 VC_861_0  | 29  | 0.9954 | 1          | 0.9954 | 0 | 0 | 0 | 1 Ref      |
| OK585159 | Unassigned | Unassigned | Unassigned | 861_0   | Clustered           | 29 VC_861_0  | 29  | 0.9954 | 1          | 0.9954 | 0 | 0 | 0 | 1 Ref      |
| OK585160 | Unassigned | Unassigned | Unassigned | 861_0   | Clustered           | 29 VC_861_0  | 29  | 0.9954 | 1          | 0.9954 | 0 | 0 | 0 | 1 Ref      |
| OK625527 | Unassigned | Unassigned | Unassigned | 466_0   | Clustered           | 66 VC_466_0  | 66  | 0.9246 | 1          | 0.9246 | 0 | 0 | 0 | 1 Ref      |
| OK625546 | Unassigned | Unassigned | Unassigned | 911_0   | Clustered           | 20 VC_911_0  | 20  | 0.9915 | 1          | 0.9915 | 0 | 0 | 0 | 1 Ref      |
| OK631811 | Unassigned | Unassigned | Unassigned | 509_0   | Clustered           | 36 VC_509_0  | 36  | 0.5291 | 1          | 0.5291 | 0 | 0 | 0 | 0.9714 Ref |
| OK631812 | Unassigned | Unassigned | Unassigned | 686_0   | Clustered           | 25 VC_686_0  | 25  | 0.5501 | 1          | 0.5501 | 0 | 0 | 0 | 0.96 Ref   |
| OK631813 | Unassigned | Unassigned | Unassigned | 686_0   | Clustered           | 25 VC_686_0  | 25  | 0.5501 | 1          | 0.5501 | 0 | 0 | 0 | 0.96 Ref   |
| OK632025 | Unassigned | Unassigned | Unassigned | 855_0   | Clustered           | 12 VC_855_0  | 12  | 0.6068 | 1          | 0.6068 | 0 | 0 | 0 | 1 Ref      |
| OK638201 | Unassigned | Unassigned | Unassigned | 1068_0  | Clustered           | 8 VC_1068_0  | 8   | 0.9291 | 1          | 0.9291 | 0 | 0 | 0 | 1 Ref      |
| OK638202 | Unassigned | Unassigned | Unassigned | 1068_0  | Clustered           | 8 VC_1068_0  | 8   | 0.9291 | 1          | 0.9291 | 0 | 0 | 0 | 1 Ref      |
| OK638203 | Unassigned | Unassigned | Unassigned | 1068_0  | Clustered           | 8 VC_1068_0  | 8   | 0.9291 | 1          | 0.9291 | 0 | 0 | 0 | 1 Ref      |
| OK649958 | Unassigned | Unassigned | Unassigned | 317_0   | Clustered           | 33 VC_317_0  | 33  | 0.8756 | 1          | 0.8756 | 0 | 0 | 0 | 1 Ref      |
| OK655936 | Unassigned | Unassigned | Unassigned | 972_0   | Clustered           | 99 VC_972_0  | 99  | 0.9113 | 1          | 0.9113 | 0 | 0 | 0 | 0.9928 Ref |
| OK663600 | Unassigned | Unassigned | Unassigned | 399_0   | Clustered           | 49 VC_399_0  | 49  | 0.7927 | 1          | 0.7927 | 0 | 0 | 0 | 1 Ref      |
| OK665488 | Unassigned | Unassigned | Unassigned | 862_0   | Clustered           | 29 VC_862_0  | 29  | 0.8594 | 1          | 0.8594 | 0 | 0 | 0 | 1 Ref      |
| OK665835 | Unassigned | Unassigned | Unassigned | 198_28  | Clustered           | 5 VC_198_28  | 5   | 0.03   | 0.99999993 | 0.03   | 0 | 0 | 0 | 1 Ref      |
| OK665842 | Unassigned | Unassigned | Unassigned | 249_1   | Clustered           | 21 VC_249_1  | 21  | 0.6775 | 1          | 0.6775 | 0 | 0 | 0 | 0.8476 Ref |
| OK905446 | Unassigned | Unassigned | Unassigned | 549_1   | Clustered           | 6 VC_549_1   | 6   | 0.1479 | 0.9998319  | 0.1478 | 0 | 0 | 0 | 1 Ref      |
| OK913679 | Unassigned | Unassigned | Unassigned | 118_0   | Clustered           | 13 VC_118_0  | 13  | 1      | 1          | 1      | 0 | 0 | 0 | 1 Ref      |
| OK913680 | Unassigned | Unassigned | Unassigned | 118_0   | Clustered           | 13 VC_118_0  | 13  | 1      | 1          | 1      | 0 | 0 | 0 | 1 Ref      |
| OK999978 | Unassigned | Unassigned | Unassigned | 532_0   | Clustered           | 75 VC_532_0  | 75  | 0.9393 | 1          | 0.9393 | 0 | 0 | 0 | 1 Ref      |
| OK999979 | Unassigned | Unassigned | Unassigned | 1287_0  | Clustered           | 44 VC_1287_0 | 44  | 1      | 1          | 1      | 0 | 0 | 0 | 1 Ref      |
| OK999980 | Unassigned | Unassigned | Unassigned | 1116_0  | Clustered           | 24 VC_1116_0 | 24  | 0.8376 | 1          | 0.8376 | 0 | 0 | 0 | 1 Ref      |
| OK999981 | Unassigned | Unassigned | Unassigned | 1287_0  | Clustered           | 44 VC_1287_0 | 44  | 1      | 1          | 1      | 0 | 0 | 0 | 1 Ref      |
| OL310488 | Unassigned | Unassigned | Unassigned | 290_104 | Clustered/Singleton | 1 VC_290_104 | 1   | 0      | 1          | 0      | 0 | 0 | 0 | 1 Ref      |
| OL314400 | Unassigned | Unassigned | Unassigned | 911_0   | Clustered           | 20 VC_911_0  | 20  | 0.9915 | 1          | 0.9915 | 0 | 0 | 0 | 1 Ref      |
| OL343755 | Unassigned | Unassigned | Unassigned | 1068_0  | Clustered           | 8 VC_1068_0  | 8   | 0.9291 | 1          | 0.9291 | 0 | 0 | 0 | 1 Ref      |
| OL362041 | Unassigned | Unassigned | Unassigned | 290_123 | Clustered/Singleton | 1 VC_290_123 | 1   | 0      | 1          | 0      | 0 | 0 | 0 | 1 Ref      |
| OL362268 | Unassigned | Unassigned | Unassigned | 80_0    | Clustered           | 64 VC_80_0   | 64  | 0.418  | 1          | 0.418  | 0 | 0 | 0 | 0.7649 Ref |
| OL362269 | Unassigned | Unassigned | Unassigned | 80_0    | Clustered           | 64 VC_80_0   | 64  | 0.418  | 1          | 0.418  | 0 | 0 | 0 | 0.7649 Ref |
| OL362270 | Unassigned | Unassigned | Unassigned | 907_0   | Clustered           | 32 VC_907_0  | 32  | 0.9964 | 1          | 0.9964 | 0 | 0 | 0 | 1 Ref      |
| OL362272 | Unassigned | Unassigned | Unassigned | 466_0   | Clustered           | 66 VC_466_0  | 66  | 0.9246 | 1          | 0.9246 | 0 | 0 | 0 | 1 Ref      |
| OL362273 | Unassigned | Unassigned | Unassigned | 466_0   | Clustered           | 66 VC_466_0  | 66  | 0.9246 | 1          | 0.9246 | 0 | 0 | 0 | 1 Ref      |
| OL362274 | Unassigned | Unassigned | Unassigned | 475_0   | Clustered           | 96 VC_475_0  | 96  | 0.9303 | 1          | 0.9303 | 0 | 0 | 0 | 0.9575 Ref |
| OL362275 | Unassigned | Unassigned | Unassigned | 465_0   | Clustered           | 80 VC_465_0  | 80  | 0.9988 | 1          | 0.9988 | 0 | 0 | 0 | 1 Ref      |
| OL362276 | Unassigned | Unassigned | Unassigned | 465_0   | Clustered           | 80 VC_465_0  | 80  | 0.9988 | 1          | 0.9988 | 0 | 0 | 0 | 1 Ref      |
| OL362277 | Unassigned | Unassigned | Unassigned | 474_0   | Clustered           | 19 VC_474_0  | 19  | 0.3729 | 1          | 0.3729 | 0 | 0 | 0 | 1 Ref      |
| OL362278 | Unassigned | Unassigned | Unassigned | 113_0   | Clustered           | 91 VC_113_0  | 91  | 0.9584 | 1          | 0.9584 | 0 | 0 | 0 | 1 Ref      |
| OL362279 | Unassigned | Unassigned | Unassigned | 113_0   | Clustered           | 91 VC_113_0  | 91  | 0.9584 | 1          | 0.9584 | 0 | 0 | 0 | 1 Ref      |
| OL362280 | Unassigned | Unassigned | Unassigned | 155_8   | Clustered           | 66 VC_155_8  | 66  | 0.4537 | 1          | 0.4537 | 0 | 0 | 0 | 0.8182 Ref |
| OL362281 | Unassigned | Unassigned | Unassigned | 398_0   | Clustered           | 51 VC_398_0  | 51  | 0.8741 | 1          | 0.8741 | 0 | 0 | 0 | 1 Ref      |
| OL362282 | Unassigned | Unassigned | Unassigned | 398_0   | Clustered           | 51 VC_398_0  | 51  | 0.8741 | 1          | 0.8741 | 0 | 0 | 0 | 1 Ref      |
| OL362283 | Unassigned | Unassigned | Unassigned | 398_0   | Clustered           | 51 VC_398_0  | 51  | 0.8741 | 1          | 0.8741 | 0 | 0 | 0 | 1 Ref      |
| OL396571 | Unassigned | Unassigned | Unassigned | 40_1    | Clustered           | 2 VC_40_1    | 2   | 0.042  | 0.88750846 | 0.0373 | 0 | 0 | 0 | 1 Ref      |
| OL409034 | Unassigned | Unassigned | Unassigned | 848_0   | Clustered           | 124 VC_848_0 | 124 | 0.9484 | 1          | 0.9484 | 0 | 0 | 0 | 1 Ref      |
| OL416096 | Unassigned | Unassigned | Unassigned | 114_0   | Clustered           | 8 VC_114_0   | 8   | 0.2518 | 1          | 0.2518 | 0 | 0 | 0 | 1 Ref      |
| OL436139 | Unassigned | Unassigned | Unassigned | 654_0   | Clustered           | 115 VC_654_0 | 115 | 0.7303 | 1          | 0.7303 | 0 | 0 | 0 | 0.8764 Ref |
| OL441337 | Unassigned | Unassigned | Unassigned | 486_0   | Clustered           | 47 VC_486_0  | 47  | 0.9022 | 1          | 0.9022 | 0 | 0 | 0 | 1 Ref      |
| OL451225 | Unassigned | Unassigned | Unassigned | 297_1   | Clustered           | 8 VC_297_1   | 8   | 0.0749 | 1          | 0.0749 | 0 | 0 | 0 | 0.8571 Ref |
| OL451946 | Unassigned | Unassigned | Unassigned | 199_15  | Clustered           | 2 VC_199_15  | 2   | 0.0056 | 0.93275242 | 0.0052 | 0 | 0 | 0 | 1 Ref      |
| OL455887 | Unassigned | Unassigned | Unassigned | 592_0   | Clustered           | 16 VC_592_0  | 16  | 0.7259 | 1          | 0.7259 | 0 | 0 | 0 | 1 Ref      |
| OL455888 | Unassigned | Unassigned | Unassigned | 952_0   | Clustered           | 39 VC_952_0  | 39  | 0.9064 | 1          | 0.9064 | 0 | 0 | 0 | 1 Ref      |
| OL455889 | Unassigned | Unassigned | Unassigned | 974_0   | Clustered           | 34 VC_974_0  | 34  | 0.7953 | 1          | 0.7953 | 0 | 0 | 0 | 1 Ref      |
| OL455890 | Unassigned | Unassigned | Unassigned | 592_0   | Clustered           | 16 VC_592_0  | 16  | 0.7259 | 1          | 0.7259 | 0 | 0 | 0 | 1 Ref      |
| OL455891 | Unassigned | Unassigned | Unassigned | 1016_0  | Clustered           | 62 VC_1016_0 | 62  | 0.8638 | 1          | 0.8638 | 0 | 0 | 0 | 0.743 Ref  |
| OL455892 | Unassigned | Unassigned | Unassigned | 1510_0  | Clustered           | 4 VC_1510_0  | 4   | 1      | 1          | 1      | 0 | 0 | 0 | 1 Ref      |
| OL455893 | Unassigned | Unassigned | Unassigned | 385_2   | Clustered           | 5 VC_385_2   | 5   | 0.0717 | 0.99999997 | 0.0717 | 0 | 0 | 0 | 0.9 Ref    |
| OL455894 | Unassigned | Unassigned | Unassigned | 1016_0  | Clustered           | 62 VC_1016_0 | 62  | 0.8638 | 1          | 0.8638 | 0 | 0 | 0 | 0.743 Ref  |
| OL455895 | Unassigned | Unassigned | Unassigned | 592_0   | Clustered           | 16 VC_592_0  | 16  | 0.7259 | 1          | 0.7259 | 0 | 0 | 0 | 1 Ref      |
| OL455896 | Unassigned | Unassigned | Unassigned | 1250_0  | Clustered           | 29 VC_1250_0 | 29  | 0.822  | 1          | 0.822  | 0 | 0 | 0 | 1 Ref      |
| OL455897 | Unassigned | Unassigned | Unassigned | 1278_0  | Clustered           | 19 VC_1278_0 | 19  | 1      | 1          | 1      | 0 | 0 | 0 | 1 Ref      |
| OL455898 | Unassigned | Unassigned | Unassigned | 335_62  | Clustered           | 3 VC_335_62  | 3   | 0.0187 | 0.99859194 | 0.0187 | 0 | 0 | 0 | 1 Ref      |
| OL455899 | Unassigned | Unassigned | Unassigned | 917_0   | Clustered           | 28 VC_917_0  | 28  | 0.5465 | 1          | 0.5465 | 0 | 0 | 0 | 1 Ref      |
| OL473897 | Unassigned | Unassigned | Unassigned | 1068_0  | Clustered           | 8 VC_1068_0  | 8   | 0.9291 | 1          | 0.9291 | 0 | 0 | 0 | 1 Ref      |
| OL474125 | Unassigned | Unassigned | Unassigned | 113_0   | Clustered           | 91 VC_113_0  | 91  | 0.9584 | 1          | 0.9584 | 0 | 0 | 0 | 1 Ref      |
| OL474141 | Unassigned | Unassigned | Unassigned | 340_11  | Clustered           | 15 VC_340_11 | 15  | 0.079  | 1          | 0.079  | 0 | 0 | 0 | 0.9333 Ref |



|          |            |            |            |        |                     |              |     |        |            |        |   |   |   |            |
|----------|------------|------------|------------|--------|---------------------|--------------|-----|--------|------------|--------|---|---|---|------------|
| OL502173 | Unassigned | Unassigned | Unassigned | 199_15 | Clustered           | 2 VC_199_15  | 2   | 0.0056 | 0.93275242 | 0.0052 | 0 | 0 | 0 | 1 Ref      |
| OL505078 | Unassigned | Unassigned | Unassigned | 871_1  | Clustered           | 26 VC_871_1  | 26  | 0.6303 | 1          | 0.6303 | 0 | 0 | 0 | 0.9815 Ref |
| OL505084 | Unassigned | Unassigned | Unassigned | 711_0  | Clustered           | 48 VC_711_0  | 48  | 0.8217 | 1          | 0.8217 | 0 | 0 | 0 | 1 Ref      |
| OL505085 | Unassigned | Unassigned | Unassigned | 110_0  | Clustered           | 33 VC_110_0  | 33  | 0.9488 | 1          | 0.9488 | 0 | 0 | 0 | 1 Ref      |
| OL519842 | Unassigned | Unassigned | Unassigned | 863_0  | Clustered           | 5 VC_863_0   | 5   | 0.1633 | 0.99999995 | 0.1633 | 0 | 0 | 0 | 1 Ref      |
| OL519843 | Unassigned | Unassigned | Unassigned | 654_0  | Clustered           | 115 VC_654_0 | 115 | 0.7303 | 1          | 0.7303 | 0 | 0 | 0 | 0.8764 Ref |
| OL519844 | Unassigned | Unassigned | Unassigned | 862_0  | Clustered           | 29 VC_862_0  | 29  | 0.8594 | 1          | 0.8594 | 0 | 0 | 0 | 1 Ref      |
| OL539438 | Unassigned | Unassigned | Unassigned | 1409_0 | Clustered           | 10 VC_1409_0 | 10  | 0.7779 | 1          | 0.7779 | 0 | 0 | 0 | 1 Ref      |
| OL539439 | Unassigned | Unassigned | Unassigned | 1409_0 | Clustered           | 10 VC_1409_0 | 10  | 0.7779 | 1          | 0.7779 | 0 | 0 | 0 | 1 Ref      |
| OL539440 | Unassigned | Unassigned | Unassigned | 860_0  | Clustered           | 9 VC_860_0   | 9   | 0.7723 | 1          | 0.7723 | 0 | 0 | 0 | 1 Ref      |
| OL539442 | Unassigned | Unassigned | Unassigned | 1409_0 | Clustered           | 10 VC_1409_0 | 10  | 0.7779 | 1          | 0.7779 | 0 | 0 | 0 | 1 Ref      |
| OL539443 | Unassigned | Unassigned | Unassigned | 603_0  | Clustered           | 28 VC_603_0  | 28  | 0.7692 | 1          | 0.7692 | 0 | 0 | 0 | 1 Ref      |
| OL539444 | Unassigned | Unassigned | Unassigned | 603_0  | Clustered           | 28 VC_603_0  | 28  | 0.7692 | 1          | 0.7692 | 0 | 0 | 0 | 1 Ref      |
| OL539445 | Unassigned | Unassigned | Unassigned | 976_0  | Clustered           | 36 VC_976_0  | 36  | 0.7833 | 1          | 0.7833 | 0 | 0 | 0 | 1 Ref      |
| OL539446 | Unassigned | Unassigned | Unassigned | 976_0  | Clustered           | 36 VC_976_0  | 36  | 0.7833 | 1          | 0.7833 | 0 | 0 | 0 | 1 Ref      |
| OL539447 | Unassigned | Unassigned | Unassigned | 469_0  | Clustered           | 18 VC_469_0  | 18  | 0.4583 | 1          | 0.4583 | 0 | 0 | 0 | 1 Ref      |
| OL539448 | Unassigned | Unassigned | Unassigned | 972_0  | Clustered           | 99 VC_972_0  | 99  | 0.9113 | 1          | 0.9113 | 0 | 0 | 0 | 0.9928 Ref |
| OL539449 | Unassigned | Unassigned | Unassigned | 711_0  | Clustered           | 48 VC_711_0  | 48  | 0.8217 | 1          | 0.8217 | 0 | 0 | 0 | 1 Ref      |
| OL539450 | Unassigned | Unassigned | Unassigned | 971_0  | Clustered           | 40 VC_971_0  | 40  | 0.6793 | 1          | 0.6793 | 0 | 0 | 0 | 0.9359 Ref |
| OL539451 | Unassigned | Unassigned | Unassigned | 469_0  | Clustered           | 18 VC_469_0  | 18  | 0.4583 | 1          | 0.4583 | 0 | 0 | 0 | 1 Ref      |
| OL539452 | Unassigned | Unassigned | Unassigned | 1001_0 | Clustered           | 3 VC_1001_0  | 3   | 0.3482 | 0.99841425 | 0.3476 | 0 | 0 | 0 | 1 Ref      |
| OL539453 | Unassigned | Unassigned | Unassigned | 469_0  | Clustered           | 18 VC_469_0  | 18  | 0.4583 | 1          | 0.4583 | 0 | 0 | 0 | 1 Ref      |
| OL539454 | Unassigned | Unassigned | Unassigned | 819_0  | Clustered           | 19 VC_819_0  | 19  | 0.6835 | 1          | 0.6835 | 0 | 0 | 0 | 1 Ref      |
| OL539455 | Unassigned | Unassigned | Unassigned | 1409_0 | Clustered           | 10 VC_1409_0 | 10  | 0.7779 | 1          | 0.7779 | 0 | 0 | 0 | 1 Ref      |
| OL539456 | Unassigned | Unassigned | Unassigned | 1409_0 | Clustered           | 10 VC_1409_0 | 10  | 0.7779 | 1          | 0.7779 | 0 | 0 | 0 | 1 Ref      |
| OL539458 | Unassigned | Unassigned | Unassigned | 509_0  | Clustered           | 36 VC_509_0  | 36  | 0.5291 | 1          | 0.5291 | 0 | 0 | 0 | 0.9714 Ref |
| OL539459 | Unassigned | Unassigned | Unassigned | 975_0  | Clustered           | 40 VC_975_0  | 40  | 0.6888 | 1          | 0.6888 | 0 | 0 | 0 | 1 Ref      |
| OL539460 | Unassigned | Unassigned | Unassigned | 972_0  | Clustered           | 99 VC_972_0  | 99  | 0.9113 | 1          | 0.9113 | 0 | 0 | 0 | 0.9928 Ref |
| OL539461 | Unassigned | Unassigned | Unassigned | 603_0  | Clustered           | 28 VC_603_0  | 28  | 0.7692 | 1          | 0.7692 | 0 | 0 | 0 | 1 Ref      |
| OL539462 | Unassigned | Unassigned | Unassigned | 603_0  | Clustered           | 28 VC_603_0  | 28  | 0.7692 | 1          | 0.7692 | 0 | 0 | 0 | 1 Ref      |
| OL539464 | Unassigned | Unassigned | Unassigned | 1409_0 | Clustered           | 10 VC_1409_0 | 10  | 0.7779 | 1          | 0.7779 | 0 | 0 | 0 | 1 Ref      |
| OL539465 | Unassigned | Unassigned | Unassigned | 603_0  | Clustered           | 28 VC_603_0  | 28  | 0.7692 | 1          | 0.7692 | 0 | 0 | 0 | 1 Ref      |
| OL539466 | Unassigned | Unassigned | Unassigned | 603_0  | Clustered           | 28 VC_603_0  | 28  | 0.7692 | 1          | 0.7692 | 0 | 0 | 0 | 1 Ref      |
| OL539467 | Unassigned | Unassigned | Unassigned | 469_0  | Clustered           | 18 VC_469_0  | 18  | 0.4583 | 1          | 0.4583 | 0 | 0 | 0 | 1 Ref      |
| OL539468 | Unassigned | Unassigned | Unassigned | 506_1  | Clustered           | 8 VC_506_1   | 8   | 0.2893 | 1          | 0.2893 | 0 | 0 | 0 | 1 Ref      |
| OL539470 | Unassigned | Unassigned | Unassigned | 687_0  | Clustered           | 21 VC_687_0  | 21  | 0.3608 | 1          | 0.3608 | 0 | 0 | 0 | 1 Ref      |
| OL539471 | Unassigned | Unassigned | Unassigned | 687_0  | Clustered           | 21 VC_687_0  | 21  | 0.3608 | 1          | 0.3608 | 0 | 0 | 0 | 1 Ref      |
| OL539472 | Unassigned | Unassigned | Unassigned | 971_0  | Clustered           | 40 VC_971_0  | 40  | 0.6793 | 1          | 0.6793 | 0 | 0 | 0 | 0.9359 Ref |
| OL539727 | Unassigned | Unassigned | Unassigned | 655_0  | Clustered           | 45 VC_655_0  | 45  | 0.7722 | 1          | 0.7722 | 0 | 0 | 0 | 1 Ref      |
| OL539729 | Unassigned | Unassigned | Unassigned | 465_0  | Clustered           | 80 VC_465_0  | 80  | 0.9988 | 1          | 0.9988 | 0 | 0 | 0 | 1 Ref      |
| OL547738 | Unassigned | Unassigned | Unassigned | 929_0  | Clustered           | 10 VC_929_0  | 10  | 0.7185 | 1          | 0.7185 | 0 | 0 | 0 | 1 Ref      |
| OL549188 | Unassigned | Unassigned | Unassigned | 1250_0 | Clustered           | 29 VC_1250_0 | 29  | 0.822  | 1          | 0.822  | 0 | 0 | 0 | 1 Ref      |
| OL549189 | Unassigned | Unassigned | Unassigned | 1250_0 | Clustered           | 29 VC_1250_0 | 29  | 0.822  | 1          | 0.822  | 0 | 0 | 0 | 1 Ref      |
| OL549190 | Unassigned | Unassigned | Unassigned | 335_18 | Clustered/Singleton | 1 VC_335_18  | 1   | 0      | 1          | 0      | 0 | 0 | 0 | 1 Ref      |
| OL549191 | Unassigned | Unassigned | Unassigned | 1250_0 | Clustered           | 29 VC_1250_0 | 29  | 0.822  | 1          | 0.822  | 0 | 0 | 0 | 1 Ref      |
| OL549192 | Unassigned | Unassigned | Unassigned | 1250_0 | Clustered           | 29 VC_1250_0 | 29  | 0.822  | 1          | 0.822  | 0 | 0 | 0 | 1 Ref      |
| OL551674 | Unassigned | Unassigned | Unassigned | 687_0  | Clustered           | 21 VC_687_0  | 21  | 0.3608 | 1          | 0.3608 | 0 | 0 | 0 | 1 Ref      |
| OL580764 | Unassigned | Unassigned | Unassigned | 91_1   | Clustered           | 2 VC_91_1    | 2   | 0.0444 | 0.9464689  | 0.042  | 0 | 0 | 0 | 1 Ref      |
| OL581611 | Unassigned | Unassigned | Unassigned | 131_0  | Clustered           | 43 VC_131_0  | 43  | 0.8853 | 1          | 0.8853 | 0 | 0 | 0 | 1 Ref      |
| OL604152 | Unassigned | Unassigned | Unassigned | 1090_0 | Clustered           | 8 VC_1090_0  | 8   | 0.6377 | 1          | 0.6377 | 0 | 0 | 0 | 1 Ref      |
| OL606627 | Unassigned | Unassigned | Unassigned | 611_0  | Clustered           | 50 VC_611_0  | 50  | 0.7306 | 1          | 0.7306 | 0 | 0 | 0 | 1 Ref      |
| OL614104 | Unassigned | Unassigned | Unassigned | 129_1  | Clustered/Singleton | 1 VC_129_1   | 1   | 0      | 1          | 0      | 0 | 0 | 0 | 1 Ref      |
| OL615010 | Unassigned | Unassigned | Unassigned | 859_0  | Clustered           | 67 VC_859_0  | 67  | 0.9622 | 1          | 0.9622 | 0 | 0 | 0 | 1 Ref      |
| OL615011 | Unassigned | Unassigned | Unassigned | 133_2  | Clustered           | 7 VC_133_2   | 7   | 0.0679 | 1          | 0.0679 | 0 | 0 | 0 | 0.9048 Ref |
| OL615012 | Unassigned | Unassigned | Unassigned | 290_26 | Clustered/Singleton | 1 VC_290_26  | 1   | 0      | 1          | 0      | 0 | 0 | 0 | 1 Ref      |
| OL615013 | Unassigned | Unassigned | Unassigned | 133_2  | Clustered           | 7 VC_133_2   | 7   | 0.0679 | 1          | 0.0679 | 0 | 0 | 0 | 0.9048 Ref |
| OL617020 | Unassigned | Unassigned | Unassigned | 1467_0 | Clustered           | 14 VC_1467_0 | 14  | 0.167  | 0.51390354 | 0.0858 | 0 | 0 | 0 | 1 Ref      |
| OL617021 | Unassigned | Unassigned | Unassigned | 1468_0 | Clustered           | 28 VC_1468_0 | 28  | 0.7511 | 1          | 0.7511 | 0 | 0 | 0 | 1 Ref      |
| OL617022 | Unassigned | Unassigned | Unassigned | 1468_0 | Clustered           | 28 VC_1468_0 | 28  | 0.7511 | 1          | 0.7511 | 0 | 0 | 0 | 1 Ref      |
| OL617023 | Unassigned | Unassigned | Unassigned | 1286_0 | Clustered           | 16 VC_1286_0 | 16  | 0.9448 | 1          | 0.9448 | 0 | 0 | 0 | 1 Ref      |
| OL617024 | Unassigned | Unassigned | Unassigned | 1467_0 | Clustered           | 14 VC_1467_0 | 14  | 0.167  | 0.51390354 | 0.0858 | 0 | 0 | 0 | 1 Ref      |
| OL617025 | Unassigned | Unassigned | Unassigned | 1468_0 | Clustered           | 28 VC_1468_0 | 28  | 0.7511 | 1          | 0.7511 | 0 | 0 | 0 | 1 Ref      |
| OL617026 | Unassigned | Unassigned | Unassigned | 1467_0 | Clustered           | 14 VC_1467_0 | 14  | 0.167  | 0.51390354 | 0.0858 | 0 | 0 | 0 | 1 Ref      |
| OL617027 | Unassigned | Unassigned | Unassigned | 1468_0 | Clustered           | 28 VC_1468_0 | 28  | 0.7511 | 1          | 0.7511 | 0 | 0 | 0 | 1 Ref      |
| OL617028 | Unassigned | Unassigned | Unassigned | 1299_0 | Clustered           | 53 VC_1299_0 | 53  | 0.8666 | 1          | 0.8666 | 0 | 0 | 0 | 1 Ref      |
| OL617029 | Unassigned | Unassigned | Unassigned | 1028_0 | Clustered           | 69 VC_1028_0 | 69  | 0.8547 | 1          | 0.8547 | 0 | 0 | 0 | 1 Ref      |
| OL617030 | Unassigned | Unassigned | Unassigned | 1119_0 | Clustered           | 48 VC_1119_0 | 48  | 0.852  | 1          | 0.852  | 0 | 0 | 0 | 1 Ref      |
| OL617031 | Unassigned | Unassigned | Unassigned | 1119_0 | Clustered           | 48 VC_1119_0 | 48  | 0.852  | 1          | 0.852  | 0 | 0 | 0 | 1 Ref      |
| OL617032 | Unassigned | Unassigned | Unassigned | 1104_0 | Clustered           | 44 VC_1104_0 | 44  | 0.9574 | 0.72818579 | 0.6972 | 0 | 0 | 0 | 1 Ref      |
| OL617033 | Unassigned | Unassigned | Unassigned | 1104_0 | Clustered           | 44 VC_1104_0 | 44  | 0.9574 | 0.72818579 | 0.6972 | 0 | 0 | 0 | 1 Ref      |
| OL617035 | Unassigned | Unassigned | Unassigned | 206_0  | Clustered           | 28 VC_206_0  | 28  | 0.2427 | 0.99971175 | 0.2426 | 0 | 0 | 0 | 1 Ref      |
| OL617036 | Unassigned | Unassigned | Unassigned | 1346_0 | Clustered           | 25 VC_1346_0 | 25  | 1      | 1          | 1      | 0 | 0 | 0 | 1 Ref      |
| OL617037 | Unassigned | Unassigned | Unassigned | 1276_0 | Clustered           | 3 VC_1276_0  | 3   | 1      | 0          | 0      | 0 | 0 | 0 | 1 Ref      |
| OL617041 | Unassigned | Unassigned | Unassigned | 474_0  | Clustered           | 19 VC_474_0  | 19  | 0.3729 | 1          | 0.3729 | 0 | 0 | 0 | 1 Ref      |
| OL617042 | Unassigned | Unassigned | Unassigned | 38_1   | Clustered/Singleton | 1 VC_38_1    | 1   | 0      | 1          | 0      | 0 | 0 | 0 | 1 Ref      |
| OL622073 | Unassigned | Unassigned | Unassigned | 1068_0 | Clustered           | 8 VC_1068_0  | 8   | 0.9291 | 1          | 0.9291 | 0 | 0 | 0 | 1 Ref      |
| OL634959 | Unassigned | Unassigned | Unassigned | 160_0  | Clustered           | 4 VC_160_0   | 4   | 0.1752 | 0.9999526  | 0.1752 | 0 | 0 | 0 | 1 Ref      |
| OL652658 | Unassigned | Unassigned | Unassigned | 654_0  | Clustered           | 115 VC_654_0 | 115 | 0.7303 | 1          | 0.7303 | 0 | 0 | 0 | 0.8764 Ref |
| OL656105 | Unassigned | Unassigned | Unassigned | 1245_0 | Clustered           | 2 VC_1245_0  | 2   | 0.8888 | 0.81445332 | 0.7239 | 0 | 0 | 0 | 1 Ref      |
| OL656110 | Unassigned | Unassigned | Unassigned | 133_1  | Clustered           | 6 VC_133_1   | 6   | 0.0566 | 0.99999999 | 0.0566 | 0 | 0 | 0 | 1 Ref      |
| OL657226 | Unassigned | Unassigned | Unassigned | 45_0   | Clustered           | 38 VC_45_0   | 38  | 0.5785 | 1          | 0.5785 | 0 | 0 | 0 | 0.9659 Ref |



|          |            |            |            |         |                     |              |     |        |            |        |   |   |   |        |     |
|----------|------------|------------|------------|---------|---------------------|--------------|-----|--------|------------|--------|---|---|---|--------|-----|
| OL657227 | Unassigned | Unassigned | Unassigned | 45_0    | Clustered           | 38 VC_45_0   | 38  | 0.5785 | 1          | 0.5785 | 0 | 0 | 0 | 0.9659 | Ref |
| OL657228 | Unassigned | Unassigned | Unassigned | 45_0    | Clustered           | 38 VC_45_0   | 38  | 0.5785 | 1          | 0.5785 | 0 | 0 | 0 | 0.9659 | Ref |
| OL658619 | Unassigned | Unassigned | Unassigned | 515_0   | Clustered           | 8 VC_515_0   | 8   | 0.3973 | 1          | 0.3973 | 0 | 0 | 0 | 1      | Ref |
| OL674249 | Unassigned | Unassigned | Unassigned | 972_0   | Clustered           | 99 VC_972_0  | 99  | 0.9113 | 1          | 0.9113 | 0 | 0 | 0 | 0.9928 | Ref |
| OL674541 | Unassigned | Unassigned | Unassigned | 175_0   | Clustered           | 20 VC_175_0  | 20  | 0.7504 | 1          | 0.7504 | 0 | 0 | 0 | 1      | Ref |
| OL676770 | Unassigned | Unassigned | Unassigned | 775_0   | Clustered           | 18 VC_775_0  | 18  | 0.7364 | 1          | 0.7364 | 0 | 0 | 0 | 1      | Ref |
| OL689226 | Unassigned | Unassigned | Unassigned | 1540_0  | Clustered           | 3 VC_1540_0  | 3   | 1      | 1          | 1      | 0 | 0 | 0 | 1      | Ref |
| OL689227 | Unassigned | Unassigned | Unassigned | 1540_0  | Clustered           | 3 VC_1540_0  | 3   | 1      | 1          | 1      | 0 | 0 | 0 | 1      | Ref |
| OL689230 | Unassigned | Unassigned | Unassigned | 1540_0  | Clustered           | 3 VC_1540_0  | 3   | 1      | 1          | 1      | 0 | 0 | 0 | 1      | Ref |
| OL690335 | Unassigned | Unassigned | Unassigned | 8_0     | Clustered           | 58 VC_8_0    | 58  | 0.8285 | 1          | 0.8285 | 0 | 0 | 0 | 0.9946 | Ref |
| OL691920 | Unassigned | Unassigned | Unassigned | 398_0   | Clustered           | 51 VC_398_0  | 51  | 0.8741 | 1          | 0.8741 | 0 | 0 | 0 | 1      | Ref |
| OL699877 | Unassigned | Unassigned | Unassigned | 611_0   | Clustered           | 50 VC_611_0  | 50  | 0.7306 | 1          | 0.7306 | 0 | 0 | 0 | 1      | Ref |
| OL702938 | Unassigned | Unassigned | Unassigned | 972_0   | Clustered           | 99 VC_972_0  | 99  | 0.9113 | 1          | 0.9113 | 0 | 0 | 0 | 0.9928 | Ref |
| OL702939 | Unassigned | Unassigned | Unassigned | 524_0   | Clustered           | 8 VC_524_0   | 8   | 0.7365 | 1          | 0.7365 | 0 | 0 | 0 | 1      | Ref |
| OL739525 | Unassigned | Unassigned | Unassigned | 871_1   | Clustered           | 26 VC_871_1  | 26  | 0.6303 | 1          | 0.6303 | 0 | 0 | 0 | 0.9815 | Ref |
| OL741057 | Unassigned | Unassigned | Unassigned | 155_4   | Clustered/Singleton | 1 VC_155_4   | 1   | 0      | 1          | 0      | 0 | 0 | 0 | 1      | Ref |
| OL741059 | Unassigned | Unassigned | Unassigned | 816_0   | Clustered           | 35 VC_816_0  | 35  | 0.9824 | 1          | 0.9824 | 0 | 0 | 0 | 1      | Ref |
| OL741431 | Unassigned | Unassigned | Unassigned | 610_0   | Clustered           | 14 VC_610_0  | 14  | 0.5159 | 1          | 0.5159 | 0 | 0 | 0 | 1      | Ref |
| OL741432 | Unassigned | Unassigned | Unassigned | 290_118 | Clustered           | 3 VC_290_118 | 3   | 0.0053 | 0.99046899 | 0.0053 | 0 | 0 | 0 | 1      | Ref |
| OL742559 | Unassigned | Unassigned | Unassigned | 571_6   | Clustered           | 22 VC_571_6  | 22  | 0.1207 | 1          | 0.1207 | 0 | 0 | 0 | 0.8095 | Ref |
| OL742560 | Unassigned | Unassigned | Unassigned | 1118_0  | Clustered           | 4 VC_1118_0  | 4   | 0.1491 | 0.99998427 | 0.1491 | 0 | 0 | 0 | 1      | Ref |
| OL742561 | Unassigned | Unassigned | Unassigned | 539_0   | Clustered           | 37 VC_539_0  | 37  | 0.911  | 1          | 0.911  | 0 | 0 | 0 | 1      | Ref |
| OL742562 | Unassigned | Unassigned | Unassigned | 1287_0  | Clustered           | 44 VC_1287_0 | 44  | 1      | 1          | 1      | 0 | 0 | 0 | 1      | Ref |
| OL742563 | Unassigned | Unassigned | Unassigned | 1016_0  | Clustered           | 62 VC_1016_0 | 62  | 0.8638 | 1          | 0.8638 | 0 | 0 | 0 | 0.743  | Ref |
| OL743187 | Unassigned | Unassigned | Unassigned | 713_0   | Clustered           | 26 VC_713_0  | 26  | 0.9358 | 1          | 0.9358 | 0 | 0 | 0 | 1      | Ref |
| OL744111 | Unassigned | Unassigned | Unassigned | 842_0   | Clustered           | 14 VC_842_0  | 14  | 0.6581 | 1          | 0.6581 | 0 | 0 | 0 | 1      | Ref |
| OL744112 | Unassigned | Unassigned | Unassigned | 843_0   | Clustered           | 20 VC_843_0  | 20  | 0.9621 | 1          | 0.9621 | 0 | 0 | 0 | 1      | Ref |
| OL744209 | Unassigned | Unassigned | Unassigned | 398_0   | Clustered           | 51 VC_398_0  | 51  | 0.8741 | 1          | 0.8741 | 0 | 0 | 0 | 1      | Ref |
| OL744210 | Unassigned | Unassigned | Unassigned | 972_0   | Clustered           | 99 VC_972_0  | 99  | 0.9113 | 1          | 0.9113 | 0 | 0 | 0 | 0.9928 | Ref |
| OL744211 | Unassigned | Unassigned | Unassigned | 873_6   | Clustered           | 7 VC_873_6   | 7   | 0.1635 | 0.99999999 | 0.1635 | 0 | 0 | 0 | 0.9524 | Ref |
| OL744212 | Unassigned | Unassigned | Unassigned | 398_0   | Clustered           | 51 VC_398_0  | 51  | 0.8741 | 1          | 0.8741 | 0 | 0 | 0 | 1      | Ref |
| OL744213 | Unassigned | Unassigned | Unassigned | 972_0   | Clustered           | 99 VC_972_0  | 99  | 0.9113 | 1          | 0.9113 | 0 | 0 | 0 | 0.9928 | Ref |
| OL744214 | Unassigned | Unassigned | Unassigned | 873_6   | Clustered           | 7 VC_873_6   | 7   | 0.1635 | 0.99999999 | 0.1635 | 0 | 0 | 0 | 0.9524 | Ref |
| OL744215 | Unassigned | Unassigned | Unassigned | 466_0   | Clustered           | 66 VC_466_0  | 66  | 0.9246 | 1          | 0.9246 | 0 | 0 | 0 | 1      | Ref |
| OL744216 | Unassigned | Unassigned | Unassigned | 873_6   | Clustered           | 7 VC_873_6   | 7   | 0.1635 | 0.99999999 | 0.1635 | 0 | 0 | 0 | 0.9524 | Ref |
| OL744217 | Unassigned | Unassigned | Unassigned | 398_0   | Clustered           | 51 VC_398_0  | 51  | 0.8741 | 1          | 0.8741 | 0 | 0 | 0 | 1      | Ref |
| OL744218 | Unassigned | Unassigned | Unassigned | 466_0   | Clustered           | 66 VC_466_0  | 66  | 0.9246 | 1          | 0.9246 | 0 | 1 | 0 | 1      | Ref |
| OL744219 | Unassigned | Unassigned | Unassigned | 873_6   | Clustered           | 7 VC_873_6   | 7   | 0.1635 | 0.99999999 | 0.1635 | 0 | 0 | 0 | 0.9524 | Ref |
| OL744220 | Unassigned | Unassigned | Unassigned | 873_6   | Clustered           | 7 VC_873_6   | 7   | 0.1635 | 0.99999999 | 0.1635 | 0 | 0 | 0 | 0.9524 | Ref |
| OL754588 | Unassigned | Unassigned | Unassigned | 80_0    | Clustered           | 64 VC_80_0   | 64  | 0.418  | 1          | 0.418  | 0 | 0 | 0 | 0.7649 | Ref |
| OL754589 | Unassigned | Unassigned | Unassigned | 434_0   | Clustered           | 45 VC_434_0  | 45  | 0.9479 | 1          | 0.9479 | 0 | 0 | 0 | 1      | Ref |
| OL762410 | Unassigned | Unassigned | Unassigned | 831_0   | Clustered           | 17 VC_831_0  | 17  | 0.9057 | 1          | 0.9057 | 0 | 0 | 0 | 1      | Ref |
| OL763419 | Unassigned | Unassigned | Unassigned | 172_0   | Clustered           | 26 VC_172_0  | 26  | 0.7909 | 1          | 0.7909 | 0 | 0 | 0 | 1      | Ref |
| OL763420 | Unassigned | Unassigned | Unassigned | 510_1   | Clustered           | 20 VC_510_1  | 20  | 0.4172 | 1          | 0.4172 | 0 | 0 | 0 | 1      | Ref |
| OL770073 | Unassigned | Unassigned | Unassigned | 290_177 | Clustered/Singleton | 1 VC_290_177 | 1   | 0      | 1          | 0      | 0 | 0 | 0 | 1      | Ref |
| OL770074 | Unassigned | Unassigned | Unassigned | 293_12  | Clustered           | 3 VC_293_12  | 3   | 0.0146 | 0.92328265 | 0.0135 | 0 | 0 | 0 | 1      | Ref |
| OL770107 | Unassigned | Unassigned | Unassigned | 297_6   | Clustered           | 12 VC_297_6  | 12  | 0.1139 | 1          | 0.1139 | 0 | 0 | 0 | 0.8182 | Ref |
| OL770108 | Unassigned | Unassigned | Unassigned | 595_0   | Clustered           | 35 VC_595_0  | 35  | 0.8809 | 1          | 0.8809 | 0 | 0 | 0 | 1      | Ref |
| OL770258 | Unassigned | Unassigned | Unassigned | 510_1   | Clustered           | 20 VC_510_1  | 20  | 0.4172 | 1          | 0.4172 | 0 | 0 | 0 | 1      | Ref |
| OL770259 | Unassigned | Unassigned | Unassigned | 510_1   | Clustered           | 20 VC_510_1  | 20  | 0.4172 | 1          | 0.4172 | 0 | 0 | 0 | 1      | Ref |
| OL770260 | Unassigned | Unassigned | Unassigned | 510_2   | Clustered           | 8 VC_510_2   | 8   | 0.122  | 0.98786574 | 0.1205 | 0 | 0 | 0 | 1      | Ref |
| OL770261 | Unassigned | Unassigned | Unassigned | 510_1   | Clustered           | 20 VC_510_1  | 20  | 0.4172 | 1          | 0.4172 | 0 | 0 | 0 | 1      | Ref |
| OL770262 | Unassigned | Unassigned | Unassigned | 510_1   | Clustered           | 20 VC_510_1  | 20  | 0.4172 | 1          | 0.4172 | 0 | 0 | 0 | 1      | Ref |
| OL770263 | Unassigned | Unassigned | Unassigned | 714_0   | Clustered           | 71 VC_714_0  | 71  | 0.935  | 1          | 0.935  | 0 | 0 | 0 | 1      | Ref |
| OL770276 | Unassigned | Unassigned | Unassigned | 654_0   | Clustered           | 115 VC_654_0 | 115 | 0.7303 | 1          | 0.7303 | 0 | 0 | 0 | 0.8764 | Ref |
| OL770278 | Unassigned | Unassigned | Unassigned | 859_0   | Clustered           | 67 VC_859_0  | 67  | 0.9622 | 1          | 0.9622 | 0 | 0 | 0 | 1      | Ref |
| OL770310 | Unassigned | Unassigned | Unassigned | 199_17  | Clustered           | 4 VC_199_17  | 4   | 0.0165 | 0.99893269 | 0.0165 | 0 | 0 | 0 | 0.8333 | Ref |
| OL770365 | Unassigned | Unassigned | Unassigned | 817_0   | Clustered           | 12 VC_817_0  | 12  | 0.8497 | 1          | 0.8497 | 0 | 0 | 0 | 1      | Ref |
| OL773676 | Unassigned | Unassigned | Unassigned | 465_0   | Clustered           | 80 VC_465_0  | 80  | 0.9988 | 1          | 0.9988 | 0 | 0 | 0 | 1      | Ref |
| OL773677 | Unassigned | Unassigned | Unassigned | 465_0   | Clustered           | 80 VC_465_0  | 80  | 0.9988 | 1          | 0.9988 | 0 | 0 | 0 | 1      | Ref |
| OL774866 | Unassigned | Unassigned | Unassigned | 1229_0  | Clustered           | 5 VC_1229_0  | 5   | 0.9893 | 0.91813282 | 0.9083 | 0 | 0 | 0 | 1      | Ref |
| OL774868 | Unassigned | Unassigned | Unassigned | 344_0   | Clustered           | 30 VC_344_0  | 30  | 0.523  | 1          | 0.523  | 0 | 0 | 0 | 0.9954 | Ref |
| OL774869 | Unassigned | Unassigned | Unassigned | 268_1   | Clustered           | 20 VC_268_1  | 20  | 0.1906 | 1          | 0.1906 | 0 | 0 | 0 | 0.6789 | Ref |
| OL774870 | Unassigned | Unassigned | Unassigned | 300_3   | Clustered           | 19 VC_300_3  | 19  | 0.2631 | 1          | 0.2631 | 0 | 0 | 0 | 0.8187 | Ref |
| OL774872 | Unassigned | Unassigned | Unassigned | 331_1   | Clustered           | 5 VC_331_1   | 5   | 0.1517 | 0.99999997 | 0.1517 | 0 | 0 | 0 | 1      | Ref |
| OL774873 | Unassigned | Unassigned | Unassigned | 425_0   | Clustered           | 40 VC_425_0  | 40  | 0.8399 | 1          | 0.8399 | 0 | 0 | 0 | 0.9974 | Ref |
| OL774876 | Unassigned | Unassigned | Unassigned | 1229_0  | Clustered           | 5 VC_1229_0  | 5   | 0.9893 | 0.91813282 | 0.9083 | 0 | 0 | 0 | 1      | Ref |
| OL774877 | Unassigned | Unassigned | Unassigned | 268_1   | Clustered           | 20 VC_268_1  | 20  | 0.1906 | 1          | 0.1906 | 0 | 0 | 0 | 0.6789 | Ref |
| OL780484 | Unassigned | Unassigned | Unassigned | 297_5   | Clustered           | 14 VC_297_5  | 14  | 0.141  | 1          | 0.141  | 0 | 0 | 0 | 0.9231 | Ref |
| OL791266 | Unassigned | Unassigned | Unassigned | 249_1   | Clustered           | 21 VC_249_1  | 21  | 0.6775 | 1          | 0.6775 | 0 | 0 | 0 | 0.8476 | Ref |
| OL791268 | Unassigned | Unassigned | Unassigned | 546_0   | Clustered           | 3 VC_546_0   | 3   | 0.1718 | 0.99838527 | 0.1715 | 0 | 0 | 0 | 1      | Ref |
| OL799256 | Unassigned | Unassigned | Unassigned | 711_0   | Clustered           | 48 VC_711_0  | 48  | 0.8217 | 1          | 0.8217 | 0 | 0 | 0 | 1      | Ref |
| OL799257 | Unassigned | Unassigned | Unassigned | 711_0   | Clustered           | 48 VC_711_0  | 48  | 0.8217 | 1          | 0.8217 | 0 | 0 | 0 | 1      | Ref |
| OL799258 | Unassigned | Unassigned | Unassigned | 94_0    | Clustered           | 22 VC_94_0   | 22  | 0.5602 | 1          | 0.5602 | 0 | 0 | 0 | 1      | Ref |
| OL799259 | Unassigned | Unassigned | Unassigned | 1004_0  | Clustered           | 4 VC_1004_0  | 4   | 0.2949 | 0.99997642 | 0.2949 | 0 | 0 | 0 | 1      | Ref |
| OL799260 | Unassigned | Unassigned | Unassigned | 94_0    | Clustered           | 22 VC_94_0   | 22  | 0.5602 | 1          | 0.5602 | 0 | 0 | 0 | 1      | Ref |
| OL799327 | Unassigned | Unassigned | Unassigned | 836_3   | Clustered/Singleton | 1 VC_836_3   | 1   | 0      | 1          | 0      | 0 | 0 | 0 | 1      | Ref |
| OL799328 | Unassigned | Unassigned | Unassigned | 848_0   | Clustered           | 124 VC_848_0 | 124 | 0.9484 | 1          | 0.9484 | 0 | 0 | 0 | 1      | Ref |
| OL800603 | Unassigned | Unassigned | Unassigned | 399_0   | Clustered           | 49 VC_399_0  | 49  | 0.7927 | 1          | 0.7927 | 0 | 0 | 0 | 1      | Ref |
| OL800605 | Unassigned | Unassigned | Unassigned | 398_0   | Clustered           | 51 VC_398_0  | 51  | 0.8741 | 1          | 0.8741 | 0 | 0 | 0 | 1      | Ref |
| OL800606 | Unassigned | Unassigned | Unassigned | 340_11  | Clustered           | 15 VC_340_11 | 15  | 0.079  | 1          | 0.079  | 0 | 0 | 0 | 0.9333 | Ref |



|          |            |            |            |         |                     |              |     |        |            |        |   |   |   |            |
|----------|------------|------------|------------|---------|---------------------|--------------|-----|--------|------------|--------|---|---|---|------------|
| OL800706 | Unassigned | Unassigned | Unassigned | 595_0   | Clustered           | 35 VC_595_0  | 35  | 0.8809 | 1          | 0.8809 | 0 | 0 | 0 | 1 Ref      |
| OL802210 | Unassigned | Unassigned | Unassigned | 434_0   | Clustered           | 45 VC_434_0  | 45  | 0.9479 | 1          | 0.9479 | 0 | 0 | 0 | 1 Ref      |
| OL802211 | Unassigned | Unassigned | Unassigned | 766_0   | Clustered           | 40 VC_766_0  | 40  | 0.7511 | 1          | 0.7511 | 0 | 0 | 0 | 1 Ref      |
| OL825705 | Unassigned | Unassigned | Unassigned | 340_11  | Clustered           | 15 VC_340_11 | 15  | 0.079  | 1          | 0.079  | 0 | 0 | 0 | 0.9333 Ref |
| OL829977 | Unassigned | Unassigned | Unassigned | 952_0   | Clustered           | 39 VC_952_0  | 39  | 0.9064 | 1          | 0.9064 | 0 | 0 | 0 | 1 Ref      |
| OL829978 | Unassigned | Unassigned | Unassigned | 1114_1  | Clustered/Singleton | 1 VC_1114_1  | 1   | 0      | 1          | 0      | 0 | 0 | 0 | 1 Ref      |
| OL840290 | Unassigned | Unassigned | Unassigned | 8_0     | Clustered           | 58 VC_8_0    | 58  | 0.8285 | 1          | 0.8285 | 0 | 0 | 0 | 0.9946 Ref |
| OL840900 | Unassigned | Unassigned | Unassigned | 619_2   | Clustered           | 10 VC_619_2  | 10  | 0.3034 | 1          | 0.3034 | 0 | 0 | 0 | 1 Ref      |
| OL840901 | Unassigned | Unassigned | Unassigned | 617_0   | Clustered           | 6 VC_617_0   | 6   | 0.1792 | 1          | 0.1792 | 0 | 0 | 0 | 1 Ref      |
| OL856099 | Unassigned | Unassigned | Unassigned | 636_0   | Clustered           | 13 VC_636_0  | 13  | 0.6223 | 1          | 0.6223 | 0 | 0 | 0 | 1 Ref      |
| OL856139 | Unassigned | Unassigned | Unassigned | 399_0   | Clustered           | 49 VC_399_0  | 49  | 0.7927 | 1          | 0.7927 | 0 | 0 | 0 | 1 Ref      |
| OL865411 | Unassigned | Unassigned | Unassigned | 971_0   | Clustered           | 40 VC_971_0  | 40  | 0.6793 | 1          | 0.6793 | 0 | 0 | 0 | 0.9359 Ref |
| OL870316 | Unassigned | Unassigned | Unassigned | 290_118 | Clustered           | 3 VC_290_118 | 3   | 0.0053 | 0.99046899 | 0.0053 | 0 | 0 | 0 | 1 Ref      |
| OL870317 | Unassigned | Unassigned | Unassigned | 290_112 | Clustered/Singleton | 1 VC_290_112 | 1   | 0      | 1          | 0      | 0 | 0 | 0 | 1 Ref      |
| OL870318 | Unassigned | Unassigned | Unassigned | 509_0   | Clustered           | 36 VC_509_0  | 36  | 0.5291 | 1          | 0.5291 | 0 | 0 | 0 | 0.9714 Ref |
| OL870319 | Unassigned | Unassigned | Unassigned | 509_0   | Clustered           | 36 VC_509_0  | 36  | 0.5291 | 1          | 0.5291 | 0 | 0 | 0 | 0.9714 Ref |
| OL870611 | Unassigned | Unassigned | Unassigned | 94_0    | Clustered           | 22 VC_94_0   | 22  | 0.5602 | 1          | 0.5602 | 0 | 0 | 0 | 1 Ref      |
| OL870612 | Unassigned | Unassigned | Unassigned | 110_0   | Clustered           | 33 VC_110_0  | 33  | 0.9488 | 1          | 0.9488 | 0 | 0 | 0 | 1 Ref      |
| OL955261 | Unassigned | Unassigned | Unassigned | 1013_1  | Clustered/Singleton | 1 VC_1013_1  | 1   | 0      | 1          | 0      | 0 | 0 | 0 | 1 Ref      |
| OL956808 | Unassigned | Unassigned | Unassigned | 290_65  | Clustered/Singleton | 1 VC_290_65  | 1   | 0      | 1          | 0      | 0 | 0 | 0 | 1 Ref      |
| OL959999 | Unassigned | Unassigned | Unassigned | 119_0   | Clustered           | 9 VC_119_0   | 9   | 0.9977 | 0.98988637 | 0.9876 | 0 | 0 | 0 | 1 Ref      |
| OL960029 | Unassigned | Unassigned | Unassigned | 483_0   | Clustered           | 2 VC_483_0   | 2   | 0.1472 | 0.95658144 | 0.1408 | 0 | 0 | 0 | 1 Ref      |
| OL960030 | Unassigned | Unassigned | Unassigned | 715_0   | Clustered           | 10 VC_715_0  | 10  | 0.8045 | 1          | 0.8045 | 0 | 0 | 0 | 1 Ref      |
| OL960567 | Unassigned | Unassigned | Unassigned | 155_8   | Clustered           | 66 VC_155_8  | 66  | 0.4537 | 1          | 0.4537 | 0 | 0 | 0 | 0.8182 Ref |
| OL960568 | Unassigned | Unassigned | Unassigned | 155_8   | Clustered           | 66 VC_155_8  | 66  | 0.4537 | 1          | 0.4537 | 0 | 0 | 0 | 0.8182 Ref |
| OL960569 | Unassigned | Unassigned | Unassigned | 155_8   | Clustered           | 66 VC_155_8  | 66  | 0.4537 | 1          | 0.4537 | 0 | 0 | 0 | 0.8182 Ref |
| OL960570 | Unassigned | Unassigned | Unassigned | 155_8   | Clustered           | 66 VC_155_8  | 66  | 0.4537 | 1          | 0.4537 | 0 | 0 | 0 | 0.8182 Ref |
| OL960573 | Unassigned | Unassigned | Unassigned | 819_0   | Clustered           | 19 VC_819_0  | 19  | 0.6835 | 1          | 0.6835 | 0 | 0 | 0 | 1 Ref      |
| OL960574 | Unassigned | Unassigned | Unassigned | 816_0   | Clustered           | 35 VC_816_0  | 35  | 0.9824 | 1          | 0.9824 | 0 | 0 | 0 | 1 Ref      |
| OL960575 | Unassigned | Unassigned | Unassigned | 819_0   | Clustered           | 19 VC_819_0  | 19  | 0.6835 | 1          | 0.6835 | 0 | 0 | 0 | 1 Ref      |
| OL960576 | Unassigned | Unassigned | Unassigned | 293_1   | Clustered           | 21 VC_293_1  | 21  | 0.1694 | 1          | 0.1694 | 0 | 0 | 0 | 0.9048 Ref |
| OL960577 | Unassigned | Unassigned | Unassigned | 293_1   | Clustered           | 21 VC_293_1  | 21  | 0.1694 | 1          | 0.1694 | 0 | 0 | 0 | 0.9048 Ref |
| OL960578 | Unassigned | Unassigned | Unassigned | 595_0   | Clustered           | 35 VC_595_0  | 35  | 0.8809 | 1          | 0.8809 | 0 | 0 | 0 | 1 Ref      |
| OL960579 | Unassigned | Unassigned | Unassigned | 595_0   | Clustered           | 35 VC_595_0  | 35  | 0.8809 | 1          | 0.8809 | 0 | 0 | 0 | 1 Ref      |
| OL960580 | Unassigned | Unassigned | Unassigned | 290_152 | Clustered/Singleton | 1 VC_290_152 | 1   | 0      | 1          | 0      | 0 | 0 | 0 | 1 Ref      |
| OL960581 | Unassigned | Unassigned | Unassigned | 290_157 | Clustered/Singleton | 1 VC_290_157 | 1   | 0      | 1          | 0      | 0 | 0 | 0 | 1 Ref      |
| OL960582 | Unassigned | Unassigned | Unassigned | 595_0   | Clustered           | 35 VC_595_0  | 35  | 0.8809 | 1          | 0.8809 | 0 | 0 | 0 | 1 Ref      |
| OL963731 | Unassigned | Unassigned | Unassigned | 1013_0  | Clustered           | 2 VC_1013_0  | 2   | 0.0455 | 0.94948967 | 0.0432 | 0 | 0 | 0 | 1 Ref      |
| OL964058 | Unassigned | Unassigned | Unassigned | 195_3   | Clustered           | 9 VC_195_3   | 9   | 0.1955 | 1          | 0.1955 | 0 | 0 | 0 | 0.8611 Ref |
| OL964734 | Unassigned | Unassigned | Unassigned | 475_0   | Clustered           | 96 VC_475_0  | 96  | 0.9303 | 1          | 0.9303 | 0 | 0 | 0 | 0.9575 Ref |
| OL964735 | Unassigned | Unassigned | Unassigned | 290_91  | Clustered           | 11 VC_290_91 | 11  | 0.0281 | 1          | 0.0281 | 0 | 0 | 0 | 1 Ref      |
| OL964736 | Unassigned | Unassigned | Unassigned | 135_10  | Clustered           | 10 VC_135_10 | 10  | 0.0522 | 1          | 0.0522 | 0 | 0 | 0 | 1 Ref      |
| OL964737 | Unassigned | Unassigned | Unassigned | 135_10  | Clustered           | 10 VC_135_10 | 10  | 0.0522 | 1          | 0.0522 | 0 | 0 | 0 | 1 Ref      |
| OL964738 | Unassigned | Unassigned | Unassigned | 135_10  | Clustered           | 10 VC_135_10 | 10  | 0.0522 | 1          | 0.0522 | 0 | 0 | 0 | 1 Ref      |
| OL964739 | Unassigned | Unassigned | Unassigned | 405_0   | Clustered           | 126 VC_405_0 | 126 | 0.9614 | 1          | 0.9614 | 0 | 0 | 0 | 1 Ref      |
| OL964740 | Unassigned | Unassigned | Unassigned | 405_0   | Clustered           | 126 VC_405_0 | 126 | 0.9614 | 1          | 0.9614 | 0 | 0 | 0 | 1 Ref      |
| OL964741 | Unassigned | Unassigned | Unassigned | 405_0   | Clustered           | 126 VC_405_0 | 126 | 0.9614 | 1          | 0.9614 | 0 | 0 | 0 | 1 Ref      |
| OL964742 | Unassigned | Unassigned | Unassigned | 475_0   | Clustered           | 96 VC_475_0  | 96  | 0.9303 | 1          | 0.9303 | 0 | 0 | 0 | 0.9575 Ref |
| OL964743 | Unassigned | Unassigned | Unassigned | 475_0   | Clustered           | 96 VC_475_0  | 96  | 0.9303 | 1          | 0.9303 | 0 | 0 | 0 | 0.9575 Ref |
| OL964744 | Unassigned | Unassigned | Unassigned | 475_0   | Clustered           | 96 VC_475_0  | 96  | 0.9303 | 1          | 0.9303 | 0 | 0 | 0 | 0.9575 Ref |
| OL964745 | Unassigned | Unassigned | Unassigned | 290_91  | Clustered           | 11 VC_290_91 | 11  | 0.0281 | 1          | 0.0281 | 0 | 0 | 0 | 1 Ref      |
| OL964746 | Unassigned | Unassigned | Unassigned | 135_10  | Clustered           | 10 VC_135_10 | 10  | 0.0522 | 1          | 0.0522 | 0 | 0 | 0 | 1 Ref      |
| OL964747 | Unassigned | Unassigned | Unassigned | 135_10  | Clustered           | 10 VC_135_10 | 10  | 0.0522 | 1          | 0.0522 | 0 | 0 | 0 | 1 Ref      |
| OL964748 | Unassigned | Unassigned | Unassigned | 405_0   | Clustered           | 126 VC_405_0 | 126 | 0.9614 | 1          | 0.9614 | 0 | 0 | 0 | 1 Ref      |
| OL964749 | Unassigned | Unassigned | Unassigned | 405_0   | Clustered           | 126 VC_405_0 | 126 | 0.9614 | 1          | 0.9614 | 0 | 0 | 0 | 1 Ref      |
| OL964750 | Unassigned | Unassigned | Unassigned | 405_0   | Clustered           | 126 VC_405_0 | 126 | 0.9614 | 1          | 0.9614 | 0 | 0 | 0 | 1 Ref      |
| OL964751 | Unassigned | Unassigned | Unassigned | 475_0   | Clustered           | 96 VC_475_0  | 96  | 0.9303 | 1          | 0.9303 | 0 | 0 | 0 | 0.9575 Ref |
| OL964752 | Unassigned | Unassigned | Unassigned | 475_0   | Clustered           | 96 VC_475_0  | 96  | 0.9303 | 1          | 0.9303 | 0 | 0 | 0 | 0.9575 Ref |
| OL964753 | Unassigned | Unassigned | Unassigned | 135_10  | Clustered           | 10 VC_135_10 | 10  | 0.0522 | 1          | 0.0522 | 0 | 0 | 0 | 1 Ref      |
| OL964754 | Unassigned | Unassigned | Unassigned | 617_0   | Clustered           | 6 VC_617_0   | 6   | 0.1792 | 1          | 0.1792 | 0 | 0 | 0 | 1 Ref      |
| OL964755 | Unassigned | Unassigned | Unassigned | 237_0   | Clustered           | 3 VC_237_0   | 3   | 0.0732 | 0.99355836 | 0.0727 | 0 | 0 | 0 | 0.6667 Ref |
| OL964756 | Unassigned | Unassigned | Unassigned | 456_3   | Clustered           | 3 VC_456_3   | 3   | 0.0523 | 0.99675181 | 0.0521 | 0 | 0 | 0 | 1 Ref      |
| OL964948 | Unassigned | Unassigned | Unassigned | 714_0   | Clustered           | 71 VC_714_0  | 71  | 0.935  | 1          | 0.935  | 0 | 0 | 0 | 1 Ref      |
| OL976437 | Unassigned | Unassigned | Unassigned | 113_0   | Clustered           | 91 VC_113_0  | 91  | 0.9584 | 1          | 0.9584 | 0 | 0 | 0 | 1 Ref      |
| OL979478 | Unassigned | Unassigned | Unassigned | 113_0   | Clustered           | 91 VC_113_0  | 91  | 0.9584 | 1          | 0.9584 | 0 | 0 | 0 | 1 Ref      |
| OL979479 | Unassigned | Unassigned | Unassigned | 113_0   | Clustered           | 91 VC_113_0  | 91  | 0.9584 | 1          | 0.9584 | 0 | 0 | 0 | 1 Ref      |
| OL989991 | Unassigned | Unassigned | Unassigned | 508_1   | Clustered           | 5 VC_508_1   | 5   | 0.0439 | 0.99999996 | 0.0439 | 0 | 0 | 0 | 1 Ref      |
| OM022251 | Unassigned | Unassigned | Unassigned | 32_1    | Clustered           | 16 VC_32_1   | 16  | 0.1962 | 1          | 0.1962 | 0 | 0 | 0 | 0.8333 Ref |
| OM025231 | Unassigned | Unassigned | Unassigned | 611_0   | Clustered           | 50 VC_611_0  | 50  | 0.7306 | 1          | 0.7306 | 0 | 0 | 0 | 1 Ref      |
| OM030343 | Unassigned | Unassigned | Unassigned | 155_8   | Clustered           | 66 VC_155_8  | 66  | 0.4537 | 1          | 0.4537 | 0 | 0 | 0 | 0.8182 Ref |
| OM032871 | Unassigned | Unassigned | Unassigned | 972_0   | Clustered           | 99 VC_972_0  | 99  | 0.9113 | 1          | 0.9113 | 0 | 0 | 0 | 0.9928 Ref |
| OM033133 | Unassigned | Unassigned | Unassigned | 656_0   | Clustered           | 2 VC_656_0   | 2   | 0.2731 | 0.95526917 | 0.2609 | 0 | 0 | 0 | 1 Ref      |
| OM033134 | Unassigned | Unassigned | Unassigned | 892_3   | Clustered           | 2 VC_892_3   | 2   | 0.0742 | 0.93469061 | 0.0694 | 0 | 0 | 0 | 1 Ref      |
| OM033135 | Unassigned | Unassigned | Unassigned | 892_3   | Clustered           | 2 VC_892_3   | 2   | 0.0742 | 0.93469061 | 0.0694 | 0 | 0 | 0 | 1 Ref      |
| OM033136 | Unassigned | Unassigned | Unassigned | 892_4   | Clustered/Singleton | 1 VC_892_4   | 1   | 0      | 1          | 0      | 0 | 0 | 0 | 1 Ref      |
| OM046621 | Unassigned | Unassigned | Unassigned | 40_0    | Clustered           | 6 VC_40_0    | 6   | 0.5677 | 1          | 0.5677 | 0 | 0 | 0 | 0.8667 Ref |
| OM046622 | Unassigned | Unassigned | Unassigned | 40_0    | Clustered           | 6 VC_40_0    | 6   | 0.5677 | 1          | 0.5677 | 0 | 0 | 0 | 0.8667 Ref |
| OM046623 | Unassigned | Unassigned | Unassigned | 40_0    | Clustered           | 6 VC_40_0    | 6   | 0.5677 | 1          | 0.5677 | 0 | 0 | 0 | 0.8667 Ref |
| OM046625 | Unassigned | Unassigned | Unassigned | 40_0    | Clustered           | 6 VC_40_0    | 6   | 0.5677 | 1          | 0.5677 | 0 | 0 | 0 | 0.8667 Ref |
| OM046626 | Unassigned | Unassigned | Unassigned | 235_0   | Clustered           | 60 VC_235_0  | 60  | 0.9413 | 1          | 0.9413 | 0 | 0 | 0 | 1 Ref      |
| OM046627 | Unassigned | Unassigned | Unassigned | 235_0   | Clustered           | 60 VC_235_0  | 60  | 0.9413 | 1          | 0.9413 | 0 | 0 | 0 | 1 Ref      |



|          |            |            |            |         |                     |              |     |        |            |        |   |   |   |            |
|----------|------------|------------|------------|---------|---------------------|--------------|-----|--------|------------|--------|---|---|---|------------|
| OM046628 | Unassigned | Unassigned | Unassigned | 235_0   | Clustered           | 60 VC_235_0  | 60  | 0.9413 | 1          | 0.9413 | 0 | 0 | 0 | 1 Ref      |
| OM046629 | Unassigned | Unassigned | Unassigned | 40_0    | Clustered           | 6 VC_40_0    | 6   | 0.5677 | 1          | 0.5677 | 0 | 0 | 0 | 0.8667 Ref |
| OM055665 | Unassigned | Unassigned | Unassigned | 376_0   | Clustered           | 2 VC_376_0   | 2   | 0.8003 | 0.72985431 | 0.5841 | 0 | 0 | 0 | 1 Ref      |
| OM065837 | Unassigned | Unassigned | Unassigned | 971_0   | Clustered           | 40 VC_971_0  | 40  | 0.6793 | 1          | 0.6793 | 0 | 0 | 0 | 0.9359 Ref |
| OM065838 | Unassigned | Unassigned | Unassigned | 971_0   | Clustered           | 40 VC_971_0  | 40  | 0.6793 | 1          | 0.6793 | 0 | 0 | 0 | 0.9359 Ref |
| OM065839 | Unassigned | Unassigned | Unassigned | 971_0   | Clustered           | 40 VC_971_0  | 40  | 0.6793 | 1          | 0.6793 | 0 | 0 | 0 | 0.9359 Ref |
| OM065840 | Unassigned | Unassigned | Unassigned | 972_0   | Clustered           | 99 VC_972_0  | 99  | 0.9113 | 1          | 0.9113 | 0 | 0 | 0 | 0.9928 Ref |
| OM065841 | Unassigned | Unassigned | Unassigned | 971_0   | Clustered           | 40 VC_971_0  | 40  | 0.6793 | 1          | 0.6793 | 0 | 0 | 0 | 0.9359 Ref |
| OM065842 | Unassigned | Unassigned | Unassigned | 972_0   | Clustered           | 99 VC_972_0  | 99  | 0.9113 | 1          | 0.9113 | 0 | 0 | 0 | 0.9928 Ref |
| OM065843 | Unassigned | Unassigned | Unassigned | 972_0   | Clustered           | 99 VC_972_0  | 99  | 0.9113 | 1          | 0.9113 | 0 | 0 | 0 | 0.9928 Ref |
| OM095401 | Unassigned | Unassigned | Unassigned | 5_0     | Clustered           | 27 VC_5_0    | 27  | 0.9599 | 1          | 0.9599 | 0 | 0 | 0 | 1 Ref      |
| OM103621 | Unassigned | Unassigned | Unassigned | 686_0   | Clustered           | 25 VC_686_0  | 25  | 0.5501 | 1          | 0.5501 | 0 | 0 | 0 | 0.96 Ref   |
| OM105884 | Unassigned | Unassigned | Unassigned | 335_62  | Clustered           | 3 VC_335_62  | 3   | 0.0187 | 0.99859194 | 0.0187 | 0 | 0 | 0 | 1 Ref      |
| OM105885 | Unassigned | Unassigned | Unassigned | 538_54  | Clustered/Singleton | 1 VC_538_54  | 1   | 0      | 1          | 0      | 0 | 0 | 0 | 1 Ref      |
| OM105886 | Unassigned | Unassigned | Unassigned | 528_0   | Clustered           | 12 VC_528_0  | 12  | 0.3923 | 1          | 0.3923 | 0 | 0 | 0 | 0.9697 Ref |
| OM131411 | Unassigned | Unassigned | Unassigned | 132_0   | Clustered           | 19 VC_132_0  | 19  | 0.6051 | 1          | 0.6051 | 0 | 0 | 0 | 1 Ref      |
| OM135583 | Unassigned | Unassigned | Unassigned | 290_167 | Clustered/Singleton | 1 VC_290_167 | 1   | 0      | 1          | 0      | 0 | 0 | 0 | 1 Ref      |
| OM135608 | Unassigned | Unassigned | Unassigned | 1409_0  | Clustered           | 10 VC_1409_0 | 10  | 0.7779 | 1          | 0.7779 | 0 | 0 | 0 | 1 Ref      |
| OM135992 | Unassigned | Unassigned | Unassigned | 96_0    | Clustered           | 2 VC_96_0    | 2   | 0.1257 | 0.95725182 | 0.1204 | 0 | 0 | 0 | 1 Ref      |
| OM140653 | Unassigned | Unassigned | Unassigned | 235_0   | Clustered           | 60 VC_235_0  | 60  | 0.9413 | 1          | 0.9413 | 0 | 0 | 0 | 1 Ref      |
| OM140839 | Unassigned | Unassigned | Unassigned | 740_0   | Clustered           | 4 VC_740_0   | 4   | 0.4223 | 0.99997355 | 0.4223 | 0 | 0 | 0 | 1 Ref      |
| OM141125 | Unassigned | Unassigned | Unassigned | 182_2   | Clustered/Singleton | 1 VC_182_2   | 1   | 0      | 1          | 0      | 0 | 0 | 0 | 1 Ref      |
| OM194188 | Unassigned | Unassigned | Unassigned | 848_0   | Clustered           | 124 VC_848_0 | 124 | 0.9484 | 1          | 0.9484 | 0 | 0 | 0 | 1 Ref      |
| OM194189 | Unassigned | Unassigned | Unassigned | 848_0   | Clustered           | 124 VC_848_0 | 124 | 0.9484 | 1          | 0.9484 | 0 | 0 | 0 | 1 Ref      |
| OM194190 | Unassigned | Unassigned | Unassigned | 848_0   | Clustered           | 124 VC_848_0 | 124 | 0.9484 | 1          | 0.9484 | 0 | 0 | 0 | 1 Ref      |
| OM203156 | Unassigned | Unassigned | Unassigned | 896_0   | Clustered           | 9 VC_896_0   | 9   | 0.2604 | 1          | 0.2604 | 0 | 0 | 0 | 1 Ref      |
| OM203157 | Unassigned | Unassigned | Unassigned | 1212_0  | Clustered           | 21 VC_1212_0 | 21  | 0.711  | 1          | 0.711  | 0 | 0 | 0 | 1 Ref      |
| OM203158 | Unassigned | Unassigned | Unassigned | 229_0   | Clustered           | 5 VC_229_0   | 5   | 0.0566 | 0.99999997 | 0.0566 | 0 | 0 | 0 | 1 Ref      |
| OM203159 | Unassigned | Unassigned | Unassigned | 223_4   | Clustered           | 13 VC_223_4  | 13  | 0.1649 | 1          | 0.1649 | 0 | 0 | 0 | 1 Ref      |
| OM203160 | Unassigned | Unassigned | Unassigned | 1216_0  | Clustered           | 22 VC_1216_0 | 22  | 0.4546 | 1          | 0.4546 | 0 | 0 | 0 | 1 Ref      |
| OM203161 | Unassigned | Unassigned | Unassigned | 227_0   | Clustered           | 4 VC_227_0   | 4   | 0.0609 | 0.99998808 | 0.0609 | 0 | 0 | 0 | 1 Ref      |
| OM203162 | Unassigned | Unassigned | Unassigned | 335_33  | Clustered           | 4 VC_335_33  | 4   | 0.0148 | 0.99998565 | 0.0148 | 0 | 0 | 0 | 1 Ref      |
| OM210019 | Unassigned | Unassigned | Unassigned | 654_0   | Clustered           | 115 VC_654_0 | 115 | 0.7303 | 1          | 0.7303 | 0 | 0 | 0 | 0.8764 Ref |
| OM223115 | Unassigned | Unassigned | Unassigned | 740_0   | Clustered           | 4 VC_740_0   | 4   | 0.4223 | 0.99997355 | 0.4223 | 0 | 0 | 0 | 1 Ref      |
| OM234791 | Unassigned | Unassigned | Unassigned | 766_0   | Clustered           | 40 VC_766_0  | 40  | 0.7511 | 1          | 0.7511 | 0 | 0 | 0 | 1 Ref      |
| OM234792 | Unassigned | Unassigned | Unassigned | 862_0   | Clustered           | 29 VC_862_0  | 29  | 0.8594 | 1          | 0.8594 | 0 | 0 | 0 | 1 Ref      |
| OM234793 | Unassigned | Unassigned | Unassigned | 114_0   | Clustered           | 8 VC_114_0   | 8   | 0.2518 | 1          | 0.2518 | 0 | 0 | 0 | 1 Ref      |
| OM236513 | Unassigned | Unassigned | Unassigned | 89_0    | Clustered           | 8 VC_89_0    | 8   | 0.5507 | 1          | 0.5507 | 0 | 0 | 0 | 1 Ref      |
| OM236514 | Unassigned | Unassigned | Unassigned | 18_0    | Clustered           | 4 VC_18_0    | 4   | 0.8969 | 0.99987935 | 0.8968 | 0 | 0 | 0 | 1 Ref      |
| OM236515 | Unassigned | Unassigned | Unassigned | 91_6    | Clustered/Singleton | 1 VC_91_6    | 1   | 0      | 1          | 0      | 0 | 0 | 0 | 1 Ref      |
| OM236516 | Unassigned | Unassigned | Unassigned | 489_0   | Clustered           | 3 VC_489_0   | 3   | 0.0782 | 0.99801323 | 0.078  | 0 | 0 | 0 | 1 Ref      |
| OM249648 | Unassigned | Unassigned | Unassigned | 869_0   | Clustered           | 3 VC_869_0   | 3   | 0.3287 | 0.99831497 | 0.3281 | 0 | 0 | 0 | 1 Ref      |
| OM249958 | Unassigned | Unassigned | Unassigned | 842_0   | Clustered           | 14 VC_842_0  | 14  | 0.6581 | 1          | 0.6581 | 0 | 0 | 0 | 1 Ref      |
| OM256450 | Unassigned | Unassigned | Unassigned | 131_0   | Clustered           | 43 VC_131_0  | 43  | 0.8853 | 1          | 0.8853 | 0 | 0 | 0 | 1 Ref      |
| OM256482 | Unassigned | Unassigned | Unassigned | 465_0   | Clustered           | 80 VC_465_0  | 80  | 0.9988 | 1          | 0.9988 | 0 | 0 | 0 | 1 Ref      |
| OM258170 | Unassigned | Unassigned | Unassigned | 470_0   | Clustered           | 62 VC_470_0  | 62  | 0.902  | 1          | 0.902  | 0 | 0 | 0 | 1 Ref      |
| OM262540 | Unassigned | Unassigned | Unassigned | 859_0   | Clustered           | 67 VC_859_0  | 67  | 0.9622 | 1          | 0.9622 | 0 | 0 | 0 | 1 Ref      |
| OM262541 | Unassigned | Unassigned | Unassigned | 859_0   | Clustered           | 67 VC_859_0  | 67  | 0.9622 | 1          | 0.9622 | 0 | 0 | 0 | 1 Ref      |
| OM272052 | Unassigned | Unassigned | Unassigned | 655_0   | Clustered           | 45 VC_655_0  | 45  | 0.7722 | 1          | 0.7722 | 0 | 0 | 0 | 1 Ref      |
| OM282085 | Unassigned | Unassigned | Unassigned | 131_0   | Clustered           | 43 VC_131_0  | 43  | 0.8853 | 1          | 0.8853 | 0 | 0 | 0 | 1 Ref      |
| OM283127 | Unassigned | Unassigned | Unassigned | 168_0   | Clustered           | 18 VC_168_0  | 18  | 0.7394 | 1          | 0.7394 | 0 | 0 | 0 | 0.8627 Ref |
| OM284015 | Unassigned | Unassigned | Unassigned | 249_1   | Clustered           | 21 VC_249_1  | 21  | 0.6775 | 1          | 0.6775 | 0 | 0 | 0 | 0.8476 Ref |
| OM287554 | Unassigned | Unassigned | Unassigned | 517_0   | Clustered           | 3 VC_517_0   | 3   | 0.8245 | 0.9969176  | 0.822  | 0 | 0 | 0 | 1 Ref      |
| OM291373 | Unassigned | Unassigned | Unassigned | 654_0   | Clustered           | 115 VC_654_0 | 115 | 0.7303 | 1          | 0.7303 | 0 | 0 | 0 | 0.8764 Ref |
| OM293948 | Unassigned | Unassigned | Unassigned | 97_0    | Clustered           | 3 VC_97_0    | 3   | 0.2031 | 0.99852916 | 0.2028 | 0 | 0 | 0 | 1 Ref      |
| OM304382 | Unassigned | Unassigned | Unassigned | 3_0     | Clustered           | 17 VC_3_0    | 17  | 0.5615 | 1          | 0.5615 | 0 | 0 | 0 | 1 Ref      |
| OM304856 | Unassigned | Unassigned | Unassigned | 8_0     | Clustered           | 58 VC_8_0    | 58  | 0.8285 | 1          | 0.8285 | 0 | 0 | 0 | 0.9946 Ref |
| OM313460 | Unassigned | Unassigned | Unassigned | 440_0   | Clustered           | 33 VC_440_0  | 33  | 0.992  | 1          | 0.992  | 0 | 0 | 0 | 1 Ref      |
| OM313461 | Unassigned | Unassigned | Unassigned | 440_0   | Clustered           | 33 VC_440_0  | 33  | 0.992  | 1          | 0.992  | 0 | 0 | 0 | 1 Ref      |
| OM317910 | Unassigned | Unassigned | Unassigned | 604_3   | Clustered/Singleton | 1 VC_604_3   | 1   | 0      | 1          | 0      | 0 | 0 | 0 | 1 Ref      |
| OM319461 | Unassigned | Unassigned | Unassigned | 358_1   | Clustered           | 2 VC_358_1   | 2   | 0.1209 | 0.95360882 | 0.1153 | 0 | 0 | 0 | 1 Ref      |
| OM328157 | Unassigned | Unassigned | Unassigned | 971_0   | Clustered           | 40 VC_971_0  | 40  | 0.6793 | 1          | 0.6793 | 0 | 0 | 0 | 0.9359 Ref |
| OM337876 | Unassigned | Unassigned | Unassigned | 509_0   | Clustered           | 36 VC_509_0  | 36  | 0.5291 | 1          | 0.5291 | 0 | 0 | 0 | 0.9714 Ref |
| OM337877 | Unassigned | Unassigned | Unassigned | 509_0   | Clustered           | 36 VC_509_0  | 36  | 0.5291 | 1          | 0.5291 | 0 | 0 | 0 | 0.9714 Ref |
| OM339528 | Unassigned | Unassigned | Unassigned | 290_92  | Clustered           | 4 VC_290_92  | 4   | 0.0078 | 0.99995066 | 0.0078 | 0 | 0 | 0 | 1 Ref      |
| OM339548 | Unassigned | Unassigned | Unassigned | 654_0   | Clustered           | 115 VC_654_0 | 115 | 0.7303 | 1          | 0.7303 | 0 | 0 | 0 | 0.8764 Ref |
| OM339718 | Unassigned | Unassigned | Unassigned | 457_4   | Clustered           | 10 VC_457_4  | 10  | 0.3316 | 1          | 0.3316 | 0 | 0 | 0 | 0.9333 Ref |
| OM350011 | Unassigned | Unassigned | Unassigned | 912_1   | Clustered           | 12 VC_912_1  | 12  | 0.2423 | 1          | 0.2423 | 0 | 0 | 0 | 1 Ref      |
| OM350012 | Unassigned | Unassigned | Unassigned | 913_0   | Clustered           | 28 VC_913_0  | 28  | 0.6206 | 1          | 0.6206 | 0 | 0 | 0 | 0.9841 Ref |
| OM350013 | Unassigned | Unassigned | Unassigned | 913_0   | Clustered           | 28 VC_913_0  | 28  | 0.6206 | 1          | 0.6206 | 0 | 0 | 0 | 0.9841 Ref |
| OM355495 | Unassigned | Unassigned | Unassigned | 465_0   | Clustered           | 80 VC_465_0  | 80  | 0.9988 | 1          | 0.9988 | 0 | 0 | 0 | 1 Ref      |
| OM362522 | Unassigned | Unassigned | Unassigned | 861_0   | Clustered           | 29 VC_861_0  | 29  | 0.9954 | 1          | 0.9954 | 0 | 0 | 0 | 1 Ref      |
| OM362897 | Unassigned | Unassigned | Unassigned | 871_1   | Clustered           | 26 VC_871_1  | 26  | 0.6303 | 1          | 0.6303 | 0 | 0 | 0 | 0.9815 Ref |
| OM367911 | Unassigned | Unassigned | Unassigned | 135_20  | Clustered/Singleton | 1 VC_135_20  | 1   | 0      | 1          | 0      | 0 | 0 | 0 | 1 Ref      |
| OM373202 | Unassigned | Unassigned | Unassigned | 698_0   | Clustered           | 2 VC_698_0   | 2   | 1      | 1          | 1      | 0 | 0 | 0 | 1 Ref      |
| OM373550 | Unassigned | Unassigned | Unassigned | 15_1    | Clustered           | 9 VC_15_1    | 9   | 0.1817 | 1          | 0.1817 | 0 | 0 | 0 | 0.9167 Ref |
| OM373551 | Unassigned | Unassigned | Unassigned | 11_0    | Clustered           | 19 VC_11_0   | 19  | 0.7544 | 1          | 0.7544 | 0 | 0 | 0 | 1 Ref      |
| OM373552 | Unassigned | Unassigned | Unassigned | 11_0    | Clustered           | 19 VC_11_0   | 19  | 0.7544 | 1          | 0.7544 | 0 | 0 | 0 | 1 Ref      |
| OM373553 | Unassigned | Unassigned | Unassigned | 11_0    | Clustered           | 19 VC_11_0   | 19  | 0.7544 | 1          | 0.7544 | 0 | 0 | 0 | 1 Ref      |
| OM373554 | Unassigned | Unassigned | Unassigned | 15_1    | Clustered           | 9 VC_15_1    | 9   | 0.1817 | 1          | 0.1817 | 0 | 0 | 0 | 0.9167 Ref |
| OM373555 | Unassigned | Unassigned | Unassigned | 15_1    | Clustered           | 9 VC_15_1    | 9   | 0.1817 | 1          | 0.1817 | 0 | 0 | 0 | 0.9167 Ref |



|          |            |            |            |         |                     |              |    |        |            |        |   |   |   |        |     |
|----------|------------|------------|------------|---------|---------------------|--------------|----|--------|------------|--------|---|---|---|--------|-----|
| OM373556 | Unassigned | Unassigned | Unassigned | 15_1    | Clustered           | 9 VC_15_1    | 9  | 0.1817 | 1          | 0.1817 | 0 | 0 | 0 | 0.9167 | Ref |
| OM373557 | Unassigned | Unassigned | Unassigned | 155_8   | Clustered           | 66 VC_155_8  | 66 | 0.4537 | 1          | 0.4537 | 0 | 0 | 0 | 0.8182 | Ref |
| OM373558 | Unassigned | Unassigned | Unassigned | 15_0    | Clustered           | 3 VC_15_0    | 3  | 0.0477 | 0.99853676 | 0.0476 | 0 | 0 | 0 | 1      | Ref |
| OM373561 | Unassigned | Unassigned | Unassigned | 15_1    | Clustered           | 9 VC_15_1    | 9  | 0.1817 | 1          | 0.1817 | 0 | 0 | 0 | 0.9167 | Ref |
| OM386652 | Unassigned | Unassigned | Unassigned | 737_0   | Clustered           | 13 VC_737_0  | 13 | 0.5083 | 1          | 0.5083 | 0 | 0 | 0 | 1      | Ref |
| OM386653 | Unassigned | Unassigned | Unassigned | 872_0   | Clustered           | 28 VC_872_0  | 28 | 0.7887 | 1          | 0.7887 | 0 | 0 | 0 | 1      | Ref |
| OM386654 | Unassigned | Unassigned | Unassigned | 872_0   | Clustered           | 28 VC_872_0  | 28 | 0.7887 | 1          | 0.7887 | 0 | 0 | 0 | 1      | Ref |
| OM386655 | Unassigned | Unassigned | Unassigned | 297_4   | Clustered           | 2 VC_297_4   | 2  | 0.0091 | 0.90221774 | 0.0082 | 0 | 0 | 0 | 1      | Ref |
| OM386656 | Unassigned | Unassigned | Unassigned | 871_1   | Clustered           | 26 VC_871_1  | 26 | 0.6303 | 1          | 0.6303 | 0 | 0 | 0 | 0.9815 | Ref |
| OM386657 | Unassigned | Unassigned | Unassigned | 198_5   | Clustered/Singleton | 1 VC_198_5   | 1  | 0      | 1          | 0      | 0 | 0 | 0 | 1      | Ref |
| OM386658 | Unassigned | Unassigned | Unassigned | 872_0   | Clustered           | 28 VC_872_0  | 28 | 0.7887 | 1          | 0.7887 | 0 | 0 | 0 | 1      | Ref |
| OM386659 | Unassigned | Unassigned | Unassigned | 871_1   | Clustered           | 26 VC_871_1  | 26 | 0.6303 | 1          | 0.6303 | 0 | 0 | 0 | 0.9815 | Ref |
| OM386660 | Unassigned | Unassigned | Unassigned | 198_8   | Clustered/Singleton | 1 VC_198_8   | 1  | 0      | 1          | 0      | 0 | 0 | 0 | 1      | Ref |
| OM386661 | Unassigned | Unassigned | Unassigned | 340_22  | Clustered           | 5 VC_340_22  | 5  | 0.0219 | 0.99999994 | 0.0219 | 0 | 0 | 0 | 1      | Ref |
| OM386662 | Unassigned | Unassigned | Unassigned | 293_9   | Clustered/Singleton | 1 VC_293_9   | 1  | 0      | 1          | 0      | 0 | 0 | 0 | 1      | Ref |
| OM386663 | Unassigned | Unassigned | Unassigned | 340_22  | Clustered           | 5 VC_340_22  | 5  | 0.0219 | 0.99999994 | 0.0219 | 0 | 0 | 0 | 1      | Ref |
| OM386664 | Unassigned | Unassigned | Unassigned | 340_22  | Clustered           | 5 VC_340_22  | 5  | 0.0219 | 0.99999994 | 0.0219 | 0 | 0 | 0 | 1      | Ref |
| OM386665 | Unassigned | Unassigned | Unassigned | 340_22  | Clustered           | 5 VC_340_22  | 5  | 0.0219 | 0.99999994 | 0.0219 | 0 | 0 | 0 | 1      | Ref |
| OM386666 | Unassigned | Unassigned | Unassigned | 290_126 | Clustered/Singleton | 1 VC_290_126 | 1  | 0      | 1          | 0      | 0 | 0 | 0 | 1      | Ref |
| OM386667 | Unassigned | Unassigned | Unassigned | 871_1   | Clustered           | 26 VC_871_1  | 26 | 0.6303 | 1          | 0.6303 | 0 | 0 | 0 | 0.9815 | Ref |
| OM401712 | Unassigned | Unassigned | Unassigned | 360_0   | Clustered           | 22 VC_360_0  | 22 | 0.96   | 1          | 0.96   | 0 | 0 | 0 | 1      | Ref |
| OM401713 | Unassigned | Unassigned | Unassigned | 360_0   | Clustered           | 22 VC_360_0  | 22 | 0.96   | 1          | 0.96   | 0 | 0 | 0 | 1      | Ref |
| OM401714 | Unassigned | Unassigned | Unassigned | 360_0   | Clustered           | 22 VC_360_0  | 22 | 0.96   | 1          | 0.96   | 0 | 0 | 0 | 1      | Ref |
| OM401812 | Unassigned | Unassigned | Unassigned | 872_0   | Clustered           | 28 VC_872_0  | 28 | 0.7887 | 1          | 0.7887 | 0 | 0 | 0 | 1      | Ref |
| OM416763 | Unassigned | Unassigned | Unassigned | 495_0   | Clustered           | 17 VC_495_0  | 17 | 0.9095 | 1          | 0.9095 | 0 | 0 | 0 | 1      | Ref |
| OM416764 | Unassigned | Unassigned | Unassigned | 495_0   | Clustered           | 17 VC_495_0  | 17 | 0.9095 | 1          | 0.9095 | 0 | 0 | 0 | 1      | Ref |
| OM416765 | Unassigned | Unassigned | Unassigned | 495_0   | Clustered           | 17 VC_495_0  | 17 | 0.9095 | 1          | 0.9095 | 0 | 0 | 0 | 1      | Ref |
| OM416766 | Unassigned | Unassigned | Unassigned | 495_0   | Clustered           | 17 VC_495_0  | 17 | 0.9095 | 1          | 0.9095 | 0 | 0 | 0 | 1      | Ref |
| OM416767 | Unassigned | Unassigned | Unassigned | 495_0   | Clustered           | 17 VC_495_0  | 17 | 0.9095 | 1          | 0.9095 | 0 | 0 | 0 | 1      | Ref |
| OM416768 | Unassigned | Unassigned | Unassigned | 495_0   | Clustered           | 17 VC_495_0  | 17 | 0.9095 | 1          | 0.9095 | 0 | 0 | 0 | 1      | Ref |
| OM416769 | Unassigned | Unassigned | Unassigned | 495_0   | Clustered           | 17 VC_495_0  | 17 | 0.9095 | 1          | 0.9095 | 0 | 0 | 0 | 1      | Ref |
| OM416770 | Unassigned | Unassigned | Unassigned | 495_0   | Clustered           | 17 VC_495_0  | 17 | 0.9095 | 1          | 0.9095 | 0 | 0 | 0 | 1      | Ref |
| OM416771 | Unassigned | Unassigned | Unassigned | 495_0   | Clustered           | 17 VC_495_0  | 17 | 0.9095 | 1          | 0.9095 | 0 | 0 | 0 | 1      | Ref |
| OM416772 | Unassigned | Unassigned | Unassigned | 495_0   | Clustered           | 17 VC_495_0  | 17 | 0.9095 | 1          | 0.9095 | 0 | 0 | 0 | 1      | Ref |
| OM416773 | Unassigned | Unassigned | Unassigned | 495_0   | Clustered           | 17 VC_495_0  | 17 | 0.9095 | 1          | 0.9095 | 0 | 0 | 0 | 1      | Ref |
| OM416774 | Unassigned | Unassigned | Unassigned | 495_0   | Clustered           | 17 VC_495_0  | 17 | 0.9095 | 1          | 0.9095 | 0 | 0 | 0 | 1      | Ref |
| OM416775 | Unassigned | Unassigned | Unassigned | 495_0   | Clustered           | 17 VC_495_0  | 17 | 0.9095 | 1          | 0.9095 | 0 | 0 | 0 | 1      | Ref |
| OM416776 | Unassigned | Unassigned | Unassigned | 495_0   | Clustered           | 17 VC_495_0  | 17 | 0.9095 | 1          | 0.9095 | 0 | 0 | 0 | 1      | Ref |
| OM416777 | Unassigned | Unassigned | Unassigned | 495_0   | Clustered           | 17 VC_495_0  | 17 | 0.9095 | 1          | 0.9095 | 0 | 0 | 0 | 1      | Ref |
| OM416778 | Unassigned | Unassigned | Unassigned | 495_0   | Clustered           | 17 VC_495_0  | 17 | 0.9095 | 1          | 0.9095 | 0 | 0 | 0 | 1      | Ref |
| OM416779 | Unassigned | Unassigned | Unassigned | 495_0   | Clustered           | 17 VC_495_0  | 17 | 0.9095 | 1          | 0.9095 | 0 | 0 | 0 | 1      | Ref |
| OM418625 | Unassigned | Unassigned | Unassigned | 45_0    | Clustered           | 38 VC_45_0   | 38 | 0.5785 | 1          | 0.5785 | 0 | 0 | 0 | 0.9659 | Ref |
| OM418626 | Unassigned | Unassigned | Unassigned | 45_0    | Clustered           | 38 VC_45_0   | 38 | 0.5785 | 1          | 0.5785 | 0 | 0 | 0 | 0.9659 | Ref |
| OM418627 | Unassigned | Unassigned | Unassigned | 45_0    | Clustered           | 38 VC_45_0   | 38 | 0.5785 | 1          | 0.5785 | 0 | 0 | 0 | 0.9659 | Ref |
| OM421595 | Unassigned | Unassigned | Unassigned | 78_0    | Clustered           | 20 VC_78_0   | 20 | 0.9639 | 1          | 0.9639 | 0 | 0 | 0 | 1      | Ref |
| OM439662 | Unassigned | Unassigned | Unassigned | 9_0     | Clustered           | 38 VC_9_0    | 38 | 0.4859 | 1          | 0.4859 | 0 | 0 | 0 | 1      | Ref |
| OM439663 | Unassigned | Unassigned | Unassigned | 12_0    | Clustered           | 21 VC_12_0   | 21 | 0.2262 | 1          | 0.2262 | 0 | 0 | 0 | 0.9571 | Ref |
| OM439664 | Unassigned | Unassigned | Unassigned | 7_0     | Clustered           | 28 VC_7_0    | 28 | 0.389  | 1          | 0.389  | 0 | 0 | 0 | 0.9947 | Ref |
| OM439665 | Unassigned | Unassigned | Unassigned | 8_0     | Clustered           | 58 VC_8_0    | 58 | 0.8285 | 1          | 0.8285 | 0 | 0 | 0 | 0.9946 | Ref |
| OM439666 | Unassigned | Unassigned | Unassigned | 9_0     | Clustered           | 38 VC_9_0    | 38 | 0.4859 | 1          | 0.4859 | 0 | 0 | 0 | 1      | Ref |
| OM439667 | Unassigned | Unassigned | Unassigned | 8_0     | Clustered           | 58 VC_8_0    | 58 | 0.8285 | 1          | 0.8285 | 0 | 0 | 0 | 0.9946 | Ref |
| OM439668 | Unassigned | Unassigned | Unassigned | 9_0     | Clustered           | 38 VC_9_0    | 38 | 0.4859 | 1          | 0.4859 | 0 | 0 | 0 | 1      | Ref |
| OM439669 | Unassigned | Unassigned | Unassigned | 12_0    | Clustered           | 21 VC_12_0   | 21 | 0.2262 | 1          | 0.2262 | 0 | 0 | 0 | 0.9571 | Ref |
| OM439670 | Unassigned | Unassigned | Unassigned | 9_0     | Clustered           | 38 VC_9_0    | 38 | 0.4859 | 1          | 0.4859 | 0 | 0 | 0 | 1      | Ref |
| OM439671 | Unassigned | Unassigned | Unassigned | 9_0     | Clustered           | 38 VC_9_0    | 38 | 0.4859 | 1          | 0.4859 | 0 | 0 | 0 | 1      | Ref |
| OM439672 | Unassigned | Unassigned | Unassigned | 12_0    | Clustered           | 21 VC_12_0   | 21 | 0.2262 | 1          | 0.2262 | 0 | 0 | 0 | 0.9571 | Ref |
| OM439673 | Unassigned | Unassigned | Unassigned | 12_0    | Clustered           | 21 VC_12_0   | 21 | 0.2262 | 1          | 0.2262 | 0 | 0 | 0 | 0.9571 | Ref |
| OM439674 | Unassigned | Unassigned | Unassigned | 12_0    | Clustered           | 21 VC_12_0   | 21 | 0.2262 | 1          | 0.2262 | 0 | 0 | 0 | 0.9571 | Ref |
| OM439675 | Unassigned | Unassigned | Unassigned | 9_0     | Clustered           | 38 VC_9_0    | 38 | 0.4859 | 1          | 0.4859 | 0 | 0 | 0 | 1      | Ref |
| OM456492 | Unassigned | Unassigned | Unassigned | 994_5   | Clustered           | 19 VC_994_5  | 19 | 0.2622 | 1          | 0.2622 | 0 | 0 | 0 | 1      | Ref |
| OM457001 | Unassigned | Unassigned | Unassigned | 291_0   | Clustered           | 3 VC_291_0   | 3  | 0.0482 | 0.99860971 | 0.0482 | 0 | 0 | 0 | 1      | Ref |
| OM457002 | Unassigned | Unassigned | Unassigned | 465_0   | Clustered           | 80 VC_465_0  | 80 | 0.9988 | 1          | 0.9988 | 0 | 0 | 0 | 1      | Ref |
| OM471789 | Unassigned | Unassigned | Unassigned | 131_0   | Clustered           | 43 VC_131_0  | 43 | 0.8853 | 1          | 0.8853 | 0 | 0 | 0 | 1      | Ref |
| OM471864 | Unassigned | Unassigned | Unassigned | 713_0   | Clustered           | 26 VC_713_0  | 26 | 0.9358 | 1          | 0.9358 | 0 | 0 | 0 | 1      | Ref |
| OM475426 | Unassigned | Unassigned | Unassigned | 235_0   | Clustered           | 60 VC_235_0  | 60 | 0.9413 | 1          | 0.9413 | 0 | 0 | 0 | 1      | Ref |
| OM475427 | Unassigned | Unassigned | Unassigned | 45_0    | Clustered           | 38 VC_45_0   | 38 | 0.5785 | 1          | 0.5785 | 0 | 0 | 0 | 0.9659 | Ref |
| OM475428 | Unassigned | Unassigned | Unassigned | 45_0    | Clustered           | 38 VC_45_0   | 38 | 0.5785 | 1          | 0.5785 | 0 | 0 | 0 | 0.9659 | Ref |
| OM475429 | Unassigned | Unassigned | Unassigned | 235_0   | Clustered           | 60 VC_235_0  | 60 | 0.9413 | 1          | 0.9413 | 0 | 0 | 0 | 1      | Ref |
| OM475430 | Unassigned | Unassigned | Unassigned | 45_0    | Clustered           | 38 VC_45_0   | 38 | 0.5785 | 1          | 0.5785 | 0 | 0 | 0 | 0.9659 | Ref |
| OM475431 | Unassigned | Unassigned | Unassigned | 235_0   | Clustered           | 60 VC_235_0  | 60 | 0.9413 | 1          | 0.9413 | 0 | 0 | 0 | 1      | Ref |
| OM475432 | Unassigned | Unassigned | Unassigned | 45_0    | Clustered           | 38 VC_45_0   | 38 | 0.5785 | 1          | 0.5785 | 0 | 0 | 0 | 0.9659 | Ref |
| OM475433 | Unassigned | Unassigned | Unassigned | 235_0   | Clustered           | 60 VC_235_0  | 60 | 0.9413 | 1          | 0.9413 | 0 | 0 | 0 | 1      | Ref |
| OM475434 | Unassigned | Unassigned | Unassigned | 235_0   | Clustered           | 60 VC_235_0  | 60 | 0.9413 | 1          | 0.9413 | 0 | 0 | 0 | 1      | Ref |
| OM475435 | Unassigned | Unassigned | Unassigned | 45_0    | Clustered           | 38 VC_45_0   | 38 | 0.5785 | 1          | 0.5785 | 0 | 0 | 0 | 0.9659 | Ref |
| OM486945 | Unassigned | Unassigned | Unassigned | 467_0   | Clustered           | 6 VC_467_0   | 6  | 0.1136 | 1          | 0.1136 | 0 | 0 | 0 | 1      | Ref |
| OM513679 | Unassigned | Unassigned | Unassigned | 112_0   | Clustered           | 4 VC_112_0   | 4  | 0.1133 | 0.99998733 | 0.1133 | 0 | 0 | 0 | 1      | Ref |
| OM513680 | Unassigned | Unassigned | Unassigned | 112_0   | Clustered           | 4 VC_112_0   | 4  | 0.1133 | 0.99998733 | 0.1133 | 0 | 0 | 0 | 1      | Ref |
| OM515228 | Unassigned | Unassigned | Unassigned | 101_0   | Clustered           | 32 VC_101_0  | 32 | 0.8826 | 1          | 0.8826 | 0 | 0 | 0 | 1      | Ref |
| OM519319 | Unassigned | Unassigned | Unassigned | 633_0   | Clustered           | 2 VC_633_0   | 2  | 0.0354 | 0.89435023 | 0.0317 | 0 | 0 | 0 | 1      | Ref |
| OM522317 | Unassigned | Unassigned | Unassigned | 339_0   | Clustered           | 11 VC_339_0  | 11 | 0.4647 | 1          | 0.4647 | 0 | 0 | 0 | 1      | Ref |
| OM522999 | Unassigned | Unassigned | Unassigned | 1095_0  | Clustered           | 12 VC_1095_0 | 12 | 0.2819 | 0.99837092 | 0.2814 | 0 | 0 | 0 | 1      | Ref |



|          |            |            |            |        |                     |               |     |        |            |        |   |   |   |            |
|----------|------------|------------|------------|--------|---------------------|---------------|-----|--------|------------|--------|---|---|---|------------|
| OM523001 | Unassigned | Unassigned | Unassigned | 1095_0 | Clustered           | 12 VC_1095_0  | 12  | 0.2819 | 0.99837092 | 0.2814 | 0 | 0 | 0 | 1 Ref      |
| OM523002 | Unassigned | Unassigned | Unassigned | 1028_0 | Clustered           | 69 VC_1028_0  | 69  | 0.8547 | 1          | 0.8547 | 0 | 0 | 0 | 1 Ref      |
| OM541307 | Unassigned | Unassigned | Unassigned | 185_0  | Clustered           | 53 VC_185_0   | 53  | 0.9153 | 1          | 0.9153 | 0 | 0 | 0 | 1 Ref      |
| OM621814 | Unassigned | Unassigned | Unassigned | 998_0  | Clustered           | 2 VC_998_0    | 2   | 0.3698 | 0.91237788 | 0.3374 | 0 | 0 | 0 | 1 Ref      |
| OM621816 | Unassigned | Unassigned | Unassigned | 249_1  | Clustered           | 21 VC_249_1   | 21  | 0.6775 | 1          | 0.6775 | 0 | 0 | 0 | 0.8476 Ref |
| OM630219 | Unassigned | Unassigned | Unassigned | 509_0  | Clustered           | 36 VC_509_0   | 36  | 0.5291 | 1          | 0.5291 | 0 | 0 | 0 | 0.9714 Ref |
| OM630585 | Unassigned | Unassigned | Unassigned | 340_3  | Clustered           | 24 VC_340_3   | 24  | 0.1205 | 1          | 0.1205 | 0 | 0 | 0 | 0.7283 Ref |
| OM630586 | Unassigned | Unassigned | Unassigned | 405_0  | Clustered           | 126 VC_405_0  | 126 | 0.9614 | 1          | 0.9614 | 0 | 0 | 0 | 1 Ref      |
| OM630588 | Unassigned | Unassigned | Unassigned | 622_0  | Clustered           | 9 VC_622_0    | 9   | 0.9922 | 0.99999994 | 0.9922 | 0 | 0 | 0 | 1 Ref      |
| OM630590 | Unassigned | Unassigned | Unassigned | 131_0  | Clustered           | 43 VC_131_0   | 43  | 0.8853 | 1          | 0.8853 | 0 | 0 | 0 | 1 Ref      |
| OM632664 | Unassigned | Unassigned | Unassigned | 801_0  | Clustered           | 37 VC_801_0   | 37  | 0.5672 | 1          | 0.5672 | 0 | 0 | 0 | 1 Ref      |
| OM632665 | Unassigned | Unassigned | Unassigned | 801_0  | Clustered           | 37 VC_801_0   | 37  | 0.5672 | 1          | 0.5672 | 0 | 0 | 0 | 1 Ref      |
| OM632666 | Unassigned | Unassigned | Unassigned | 801_0  | Clustered           | 37 VC_801_0   | 37  | 0.5672 | 1          | 0.5672 | 0 | 0 | 0 | 1 Ref      |
| OM632667 | Unassigned | Unassigned | Unassigned | 655_0  | Clustered           | 45 VC_655_0   | 45  | 0.7722 | 1          | 0.7722 | 0 | 0 | 0 | 1 Ref      |
| OM632668 | Unassigned | Unassigned | Unassigned | 655_0  | Clustered           | 45 VC_655_0   | 45  | 0.7722 | 1          | 0.7722 | 0 | 0 | 0 | 1 Ref      |
| OM632669 | Unassigned | Unassigned | Unassigned | 801_0  | Clustered           | 37 VC_801_0   | 37  | 0.5672 | 1          | 0.5672 | 0 | 0 | 0 | 1 Ref      |
| OM632670 | Unassigned | Unassigned | Unassigned | 801_0  | Clustered           | 37 VC_801_0   | 37  | 0.5672 | 1          | 0.5672 | 0 | 0 | 0 | 1 Ref      |
| OM632671 | Unassigned | Unassigned | Unassigned | 293_7  | Clustered/Singleton | 1 VC_293_7    | 1   | 0      | 1          | 0      | 0 | 0 | 0 | 1 Ref      |
| OM632672 | Unassigned | Unassigned | Unassigned | 801_0  | Clustered           | 37 VC_801_0   | 37  | 0.5672 | 1          | 0.5672 | 0 | 0 | 0 | 1 Ref      |
| OM634653 | Unassigned | Unassigned | Unassigned | 489_0  | Clustered           | 3 VC_489_0    | 3   | 0.0782 | 0.99801323 | 0.078  | 0 | 0 | 0 | 1 Ref      |
| OM634661 | Unassigned | Unassigned | Unassigned | 92_1   | Clustered/Singleton | 1 VC_92_1     | 1   | 0      | 1          | 0      | 0 | 0 | 0 | 1 Ref      |
| OM638103 | Unassigned | Unassigned | Unassigned | 599_0  | Clustered           | 2 VC_599_0    | 2   | 0.061  | 0.95763305 | 0.0584 | 0 | 0 | 0 | 1 Ref      |
| OM638104 | Unassigned | Unassigned | Unassigned | 930_0  | Clustered           | 4 VC_930_0    | 4   | 0.2568 | 0.99997246 | 0.2568 | 0 | 0 | 0 | 1 Ref      |
| OM638608 | Unassigned | Unassigned | Unassigned | 3_0    | Clustered           | 17 VC_3_0     | 17  | 0.5615 | 1          | 0.5615 | 0 | 0 | 0 | 1 Ref      |
| OM638609 | Unassigned | Unassigned | Unassigned | 3_0    | Clustered           | 17 VC_3_0     | 17  | 0.5615 | 1          | 0.5615 | 0 | 0 | 0 | 1 Ref      |
| OM638610 | Unassigned | Unassigned | Unassigned | 3_0    | Clustered           | 17 VC_3_0     | 17  | 0.5615 | 1          | 0.5615 | 0 | 0 | 0 | 1 Ref      |
| OM638611 | Unassigned | Unassigned | Unassigned | 3_0    | Clustered           | 17 VC_3_0     | 17  | 0.5615 | 1          | 0.5615 | 0 | 0 | 0 | 1 Ref      |
| OM654379 | Unassigned | Unassigned | Unassigned | 108_1  | Clustered/Singleton | 1 VC_108_1    | 1   | 0      | 1          | 0      | 0 | 0 | 0 | 1 Ref      |
| OM654404 | Unassigned | Unassigned | Unassigned | 907_0  | Clustered           | 32 VC_907_0   | 32  | 0.9964 | 1          | 0.9964 | 0 | 0 | 0 | 1 Ref      |
| OM681507 | Unassigned | Unassigned | Unassigned | 135_14 | Clustered           | 3 VC_135_14   | 3   | 0.0101 | 0.96146265 | 0.0097 | 0 | 0 | 0 | 1 Ref      |
| OM687511 | Unassigned | Unassigned | Unassigned | 801_3  | Clustered           | 7 VC_801_3    | 7   | 0.0764 | 1          | 0.0764 | 0 | 0 | 0 | 0.7143 Ref |
| OM687892 | Unassigned | Unassigned | Unassigned | 860_0  | Clustered           | 9 VC_860_0    | 9   | 0.7723 | 1          | 0.7723 | 0 | 0 | 0 | 1 Ref      |
| OM687893 | Unassigned | Unassigned | Unassigned | 972_0  | Clustered           | 99 VC_972_0   | 99  | 0.9113 | 1          | 0.9113 | 0 | 0 | 0 | 0.9928 Ref |
| OM688977 | Unassigned | Unassigned | Unassigned | 135_32 | Clustered/Singleton | 1 VC_135_32   | 1   | 0      | 1          | 0      | 0 | 0 | 0 | 1 Ref      |
| OM732336 | Unassigned | Unassigned | Unassigned | 517_0  | Clustered           | 3 VC_517_0    | 3   | 0.8245 | 0.9969176  | 0.822  | 0 | 0 | 0 | 1 Ref      |
| OM732337 | Unassigned | Unassigned | Unassigned | 517_0  | Clustered           | 3 VC_517_0    | 3   | 0.8245 | 0.9969176  | 0.822  | 0 | 0 | 0 | 1 Ref      |
| OM735690 | Unassigned | Unassigned | Unassigned | 971_0  | Clustered           | 40 VC_971_0   | 40  | 0.6793 | 1          | 0.6793 | 0 | 0 | 0 | 0.9359 Ref |
| OM743306 | Unassigned | Unassigned | Unassigned | 912_6  | Clustered/Singleton | 1 VC_912_6    | 1   | 0      | 1          | 0      | 0 | 0 | 0 | 1 Ref      |
| OM782324 | Unassigned | Unassigned | Unassigned | 1467_0 | Clustered           | 14 VC_1467_0  | 14  | 0.167  | 0.51390354 | 0.0858 | 0 | 0 | 0 | 1 Ref      |
| OM782452 | Unassigned | Unassigned | Unassigned | 863_0  | Clustered           | 5 VC_863_0    | 5   | 0.1633 | 0.99999995 | 0.1633 | 0 | 0 | 0 | 1 Ref      |
| OM793623 | Unassigned | Unassigned | Unassigned | 594_0  | Clustered           | 7 VC_594_0    | 7   | 0.2725 | 1          | 0.2725 | 0 | 0 | 0 | 1 Ref      |
| OM799543 | Unassigned | Unassigned | Unassigned | 861_0  | Clustered           | 29 VC_861_0   | 29  | 0.9954 | 1          | 0.9954 | 0 | 0 | 0 | 1 Ref      |
| OM809160 | Unassigned | Unassigned | Unassigned | 172_0  | Clustered           | 26 VC_172_0   | 26  | 0.7909 | 1          | 0.7909 | 0 | 0 | 0 | 1 Ref      |
| OM810255 | Unassigned | Unassigned | Unassigned | 655_0  | Clustered           | 45 VC_655_0   | 45  | 0.7722 | 1          | 0.7722 | 0 | 0 | 0 | 1 Ref      |
| OM810291 | Unassigned | Unassigned | Unassigned | 817_0  | Clustered           | 12 VC_817_0   | 12  | 0.8497 | 1          | 0.8497 | 0 | 0 | 0 | 1 Ref      |
| OM810292 | Unassigned | Unassigned | Unassigned | 456_4  | Clustered           | 2 VC_456_4    | 2   | 0.0252 | 0.90563532 | 0.0228 | 0 | 0 | 0 | 1 Ref      |
| OM818327 | Unassigned | Unassigned | Unassigned | 1222_0 | Clustered           | 3 VC_1222_0   | 3   | 0.5104 | 0.99818726 | 0.5095 | 0 | 0 | 0 | 1 Ref      |
| OM818328 | Unassigned | Unassigned | Unassigned | 231_0  | Clustered           | 19 VC_231_0   | 19  | 0.9378 | 1          | 0.9378 | 0 | 0 | 0 | 1 Ref      |
| OM818329 | Unassigned | Unassigned | Unassigned | 1287_0 | Clustered           | 44 VC_1287_0  | 44  | 1      | 1          | 1      | 0 | 0 | 0 | 1 Ref      |
| OM818330 | Unassigned | Unassigned | Unassigned | 243_0  | Clustered           | 72 VC_243_0   | 72  | 0.8089 | 1          | 0.8089 | 0 | 0 | 0 | 1 Ref      |
| OM818331 | Unassigned | Unassigned | Unassigned | 1211_2 | Clustered           | 2 VC_1211_2   | 2   | 0.0765 | 0.95418906 | 0.073  | 0 | 0 | 0 | 1 Ref      |
| OM837731 | Unassigned | Unassigned | Unassigned | 941_0  | Clustered           | 5 VC_941_0    | 5   | 0.7412 | 0.99999276 | 0.7412 | 0 | 0 | 0 | 1 Ref      |
| OM850391 | Unassigned | Unassigned | Unassigned | 155_1  | Clustered           | 3 VC_155_1    | 3   | 0.0127 | 0.99282456 | 0.0126 | 0 | 0 | 0 | 1 Ref      |
| OM850392 | Unassigned | Unassigned | Unassigned | 155_1  | Clustered           | 3 VC_155_1    | 3   | 0.0127 | 0.99282456 | 0.0126 | 0 | 0 | 0 | 1 Ref      |
| OM858838 | Unassigned | Unassigned | Unassigned | 802_0  | Clustered           | 8 VC_802_0    | 8   | 0.5141 | 1          | 0.5141 | 0 | 0 | 0 | 1 Ref      |
| OM864357 | Unassigned | Unassigned | Unassigned | 113_0  | Clustered           | 91 VC_113_0   | 91  | 0.9584 | 1          | 0.9584 | 0 | 0 | 0 | 1 Ref      |
| OM867676 | Unassigned | Unassigned | Unassigned | 465_0  | Clustered           | 80 VC_465_0   | 80  | 0.9988 | 1          | 0.9988 | 0 | 0 | 0 | 1 Ref      |
| OM869494 | Unassigned | Unassigned | Unassigned | 1333_0 | Clustered           | 4 VC_1333_0   | 4   | 1      | 1          | 1      | 0 | 0 | 0 | 1 Ref      |
| OM869497 | Unassigned | Unassigned | Unassigned | 1112_0 | Clustered           | 4 VC_1112_0   | 4   | 1      | 1          | 1      | 0 | 0 | 0 | 1 Ref      |
| OM869499 | Unassigned | Unassigned | Unassigned | 1341_0 | Clustered           | 4 VC_1341_0   | 4   | 1      | 1          | 1      | 0 | 0 | 0 | 1 Ref      |
| OM869500 | Unassigned | Unassigned | Unassigned | 1341_0 | Clustered           | 4 VC_1341_0   | 4   | 1      | 1          | 1      | 0 | 0 | 0 | 1 Ref      |
| OM869502 | Unassigned | Unassigned | Unassigned | 1369_0 | Clustered           | 10 VC_1369_0  | 10  | 0.6223 | 0.95845085 | 0.5964 | 0 | 0 | 0 | 1 Ref      |
| OM869505 | Unassigned | Unassigned | Unassigned | 1369_0 | Clustered           | 10 VC_1369_0  | 10  | 0.6223 | 0.95845085 | 0.5964 | 0 | 0 | 0 | 1 Ref      |
| OM869507 | Unassigned | Unassigned | Unassigned | 1160_0 | Clustered           | 3 VC_1160_0   | 3   | 0.2567 | 0.98675879 | 0.2533 | 0 | 0 | 0 | 1 Ref      |
| OM869510 | Unassigned | Unassigned | Unassigned | 1370_0 | Clustered           | 2 VC_1370_0   | 2   | 0.3014 | 0.76024994 | 0.2292 | 0 | 0 | 0 | 1 Ref      |
| OM869512 | Unassigned | Unassigned | Unassigned | 1370_0 | Clustered           | 2 VC_1370_0   | 2   | 0.3014 | 0.76024994 | 0.2292 | 0 | 0 | 0 | 1 Ref      |
| OM869513 | Unassigned | Unassigned | Unassigned | 1186_0 | Clustered           | 5 VC_1186_0   | 5   | 0.8799 | 0.99921062 | 0.8792 | 0 | 0 | 0 | 1 Ref      |
| OM869514 | Unassigned | Unassigned | Unassigned | 1384_0 | Clustered           | 14 VC_1384_0  | 14  | 0.829  | 1          | 0.829  | 0 | 0 | 0 | 1 Ref      |
| OM869516 | Unassigned | Unassigned | Unassigned | 1186_0 | Clustered           | 5 VC_1186_0   | 5   | 0.8799 | 0.99921062 | 0.8792 | 0 | 0 | 0 | 1 Ref      |
| OM869517 | Unassigned | Unassigned | Unassigned | 1174_0 | Clustered           | 4 VC_1174_0   | 4   | 0.1295 | 0.97665214 | 0.1265 | 0 | 0 | 0 | 1 Ref      |
| OM869519 | Unassigned | Unassigned | Unassigned | 1186_0 | Clustered           | 5 VC_1186_0   | 5   | 0.8799 | 0.99921062 | 0.8792 | 0 | 0 | 0 | 1 Ref      |
| OM869521 | Unassigned | Unassigned | Unassigned | 1339_0 | Clustered           | 2 VC_1339_0   | 2   | 0.0658 | 0.94989008 | 0.0625 | 0 | 0 | 0 | 1 Ref      |
| OM869524 | Unassigned | Unassigned | Unassigned | 1145_0 | Clustered           | 164 VC_1145_0 | 164 | 0.8868 | 1          | 0.8868 | 0 | 0 | 0 | 1 Ref      |
| OM869525 | Unassigned | Unassigned | Unassigned | 1145_0 | Clustered           | 164 VC_1145_0 | 164 | 0.8868 | 1          | 0.8868 | 0 | 0 | 0 | 1 Ref      |
| OM869526 | Unassigned | Unassigned | Unassigned | 1145_0 | Clustered           | 164 VC_1145_0 | 164 | 0.8868 | 1          | 0.8868 | 0 | 0 | 0 | 1 Ref      |
| OM869527 | Unassigned | Unassigned | Unassigned | 1145_0 | Clustered           | 164 VC_1145_0 | 164 | 0.8868 | 1          | 0.8868 | 0 | 0 | 0 | 1 Ref      |
| OM869528 | Unassigned | Unassigned | Unassigned | 1145_0 | Clustered           | 164 VC_1145_0 | 164 | 0.8868 | 1          | 0.8868 | 0 | 0 | 0 | 1 Ref      |
| OM869529 | Unassigned | Unassigned | Unassigned | 1384_0 | Clustered           | 14 VC_1384_0  | 14  | 0.829  | 1          | 0.829  | 0 | 0 | 0 | 1 Ref      |
| OM869531 | Unassigned | Unassigned | Unassigned | 1145_0 | Clustered           | 164 VC_1145_0 | 164 | 0.8868 | 1          | 0.8868 | 0 | 0 | 0 | 1 Ref      |
| OM869532 | Unassigned | Unassigned | Unassigned | 1100_0 | Clustered           | 2 VC_1100_0   | 2   | 0.5133 | 0.81445332 | 0.4181 | 0 | 0 | 0 | 1 Ref      |
| OM869533 | Unassigned | Unassigned | Unassigned | 1145_0 | Clustered           | 164 VC_1145_0 | 164 | 0.8868 | 1          | 0.8868 | 0 | 0 | 0 | 1 Ref      |



|          |            |            |            |        |                     |               |     |        |            |        |   |   |   |       |
|----------|------------|------------|------------|--------|---------------------|---------------|-----|--------|------------|--------|---|---|---|-------|
| OM869534 | Unassigned | Unassigned | Unassigned | 1145_0 | Clustered           | 164 VC_1145_0 | 164 | 0.8868 | 1          | 0.8868 | 0 | 0 | 0 | 1 Ref |
| OM869535 | Unassigned | Unassigned | Unassigned | 1145_0 | Clustered           | 164 VC_1145_0 | 164 | 0.8868 | 1          | 0.8868 | 0 | 0 | 0 | 1 Ref |
| OM869536 | Unassigned | Unassigned | Unassigned | 1145_0 | Clustered           | 164 VC_1145_0 | 164 | 0.8868 | 1          | 0.8868 | 0 | 0 | 0 | 1 Ref |
| OM869537 | Unassigned | Unassigned | Unassigned | 1145_0 | Clustered           | 164 VC_1145_0 | 164 | 0.8868 | 1          | 0.8868 | 0 | 0 | 0 | 1 Ref |
| OM869538 | Unassigned | Unassigned | Unassigned | 1145_0 | Clustered           | 164 VC_1145_0 | 164 | 0.8868 | 1          | 0.8868 | 0 | 0 | 0 | 1 Ref |
| OM869540 | Unassigned | Unassigned | Unassigned | 1384_0 | Clustered           | 14 VC_1384_0  | 14  | 0.829  | 1          | 0.829  | 0 | 0 | 0 | 1 Ref |
| OM869542 | Unassigned | Unassigned | Unassigned | 1384_0 | Clustered           | 14 VC_1384_0  | 14  | 0.829  | 1          | 0.829  | 0 | 0 | 0 | 1 Ref |
| OM869543 | Unassigned | Unassigned | Unassigned | 1145_0 | Clustered           | 164 VC_1145_0 | 164 | 0.8868 | 1          | 0.8868 | 0 | 0 | 0 | 1 Ref |
| OM869544 | Unassigned | Unassigned | Unassigned | 1384_0 | Clustered           | 14 VC_1384_0  | 14  | 0.829  | 1          | 0.829  | 0 | 0 | 0 | 1 Ref |
| OM869545 | Unassigned | Unassigned | Unassigned | 1176_0 | Clustered           | 6 VC_1176_0   | 6   | 0.1252 | 0.96352059 | 0.1206 | 0 | 0 | 0 | 1 Ref |
| OM869546 | Unassigned | Unassigned | Unassigned | 1145_0 | Clustered           | 164 VC_1145_0 | 164 | 0.8868 | 1          | 0.8868 | 0 | 0 | 0 | 1 Ref |
| OM869547 | Unassigned | Unassigned | Unassigned | 1145_0 | Clustered           | 164 VC_1145_0 | 164 | 0.8868 | 1          | 0.8868 | 0 | 0 | 0 | 1 Ref |
| OM869548 | Unassigned | Unassigned | Unassigned | 1384_0 | Clustered           | 14 VC_1384_0  | 14  | 0.829  | 1          | 0.829  | 0 | 0 | 0 | 1 Ref |
| OM869549 | Unassigned | Unassigned | Unassigned | 1299_0 | Clustered           | 53 VC_1299_0  | 53  | 0.8666 | 1          | 0.8666 | 0 | 0 | 0 | 1 Ref |
| OM869550 | Unassigned | Unassigned | Unassigned | 1145_0 | Clustered           | 164 VC_1145_0 | 164 | 0.8868 | 1          | 0.8868 | 0 | 0 | 0 | 1 Ref |
| OM869551 | Unassigned | Unassigned | Unassigned | 1385_0 | Clustered           | 4 VC_1385_0   | 4   | 0.1856 | 0.61974159 | 0.115  | 0 | 0 | 0 | 1 Ref |
| OM869552 | Unassigned | Unassigned | Unassigned | 1283_0 | Clustered           | 2 VC_1283_0   | 2   | 0.1479 | 0.71150042 | 0.1053 | 0 | 0 | 0 | 1 Ref |
| OM869553 | Unassigned | Unassigned | Unassigned | 1384_0 | Clustered           | 14 VC_1384_0  | 14  | 0.829  | 1          | 0.829  | 0 | 0 | 0 | 1 Ref |
| OM869556 | Unassigned | Unassigned | Unassigned | 1385_0 | Clustered           | 4 VC_1385_0   | 4   | 0.1856 | 0.61974159 | 0.115  | 0 | 0 | 0 | 1 Ref |
| OM869557 | Unassigned | Unassigned | Unassigned | 1375_0 | Clustered           | 12 VC_1375_0  | 12  | 0.7378 | 0.86590481 | 0.6389 | 0 | 0 | 0 | 1 Ref |
| OM869558 | Unassigned | Unassigned | Unassigned | 1152_0 | Clustered           | 26 VC_1152_0  | 26  | 0.6685 | 1          | 0.6685 | 0 | 0 | 0 | 1 Ref |
| OM869559 | Unassigned | Unassigned | Unassigned | 1299_0 | Clustered           | 53 VC_1299_0  | 53  | 0.8666 | 1          | 0.8666 | 0 | 0 | 0 | 1 Ref |
| OM869560 | Unassigned | Unassigned | Unassigned | 1299_0 | Clustered           | 53 VC_1299_0  | 53  | 0.8666 | 1          | 0.8666 | 0 | 0 | 0 | 1 Ref |
| OM869561 | Unassigned | Unassigned | Unassigned | 1267_0 | Clustered           | 26 VC_1267_0  | 26  | 0.9597 | 0.99999998 | 0.9597 | 0 | 0 | 0 | 1 Ref |
| OM869562 | Unassigned | Unassigned | Unassigned | 1299_0 | Clustered           | 53 VC_1299_0  | 53  | 0.8666 | 1          | 0.8666 | 0 | 0 | 0 | 1 Ref |
| OM869563 | Unassigned | Unassigned | Unassigned | 1360_0 | Clustered           | 2 VC_1360_0   | 2   | 1      | 1          | 1      | 0 | 0 | 0 | 1 Ref |
| OM869564 | Unassigned | Unassigned | Unassigned | 1241_0 | Clustered           | 13 VC_1241_0  | 13  | 0.8675 | 0.76044592 | 0.6597 | 0 | 0 | 0 | 1 Ref |
| OM869565 | Unassigned | Unassigned | Unassigned | 1241_0 | Clustered           | 13 VC_1241_0  | 13  | 0.8675 | 0.76044592 | 0.6597 | 0 | 0 | 0 | 1 Ref |
| OM869569 | Unassigned | Unassigned | Unassigned | 1299_0 | Clustered           | 53 VC_1299_0  | 53  | 0.8666 | 1          | 0.8666 | 0 | 0 | 0 | 1 Ref |
| OM869570 | Unassigned | Unassigned | Unassigned | 1241_0 | Clustered           | 13 VC_1241_0  | 13  | 0.8675 | 0.76044592 | 0.6597 | 0 | 0 | 0 | 1 Ref |
| OM869571 | Unassigned | Unassigned | Unassigned | 1354_0 | Clustered           | 6 VC_1354_0   | 6   | 0.6609 | 0.9999272  | 0.6609 | 0 | 0 | 0 | 1 Ref |
| OM869572 | Unassigned | Unassigned | Unassigned | 1542_0 | Clustered           | 2 VC_1542_0   | 2   | 1      | 1          | 1      | 0 | 0 | 0 | 1 Ref |
| OM869573 | Unassigned | Unassigned | Unassigned | 1542_0 | Clustered           | 2 VC_1542_0   | 2   | 1      | 1          | 1      | 0 | 0 | 0 | 1 Ref |
| OM869574 | Unassigned | Unassigned | Unassigned | 1366_0 | Clustered           | 7 VC_1366_0   | 7   | 0.7919 | 0.99999998 | 0.7919 | 0 | 0 | 0 | 1 Ref |
| OM869576 | Unassigned | Unassigned | Unassigned | 1366_0 | Clustered           | 7 VC_1366_0   | 7   | 0.7919 | 0.99999998 | 0.7919 | 0 | 0 | 0 | 1 Ref |
| OM869577 | Unassigned | Unassigned | Unassigned | 1366_0 | Clustered           | 7 VC_1366_0   | 7   | 0.7919 | 0.99999998 | 0.7919 | 0 | 0 | 0 | 1 Ref |
| OM869578 | Unassigned | Unassigned | Unassigned | 1437_0 | Clustered           | 5 VC_1437_0   | 5   | 0.7338 | 0.52463554 | 0.385  | 0 | 0 | 0 | 1 Ref |
| OM869583 | Unassigned | Unassigned | Unassigned | 1543_0 | Clustered           | 3 VC_1543_0   | 3   | 1      | 1          | 1      | 0 | 0 | 0 | 1 Ref |
| OM869587 | Unassigned | Unassigned | Unassigned | 1369_0 | Clustered           | 10 VC_1369_0  | 10  | 0.6223 | 0.95845085 | 0.5964 | 0 | 0 | 0 | 1 Ref |
| OM869588 | Unassigned | Unassigned | Unassigned | 1531_0 | Clustered           | 2 VC_1531_0   | 2   | 1      | 1          | 1      | 0 | 0 | 0 | 1 Ref |
| OM869589 | Unassigned | Unassigned | Unassigned | 1384_0 | Clustered           | 14 VC_1384_0  | 14  | 0.829  | 1          | 0.829  | 0 | 0 | 0 | 1 Ref |
| OM869590 | Unassigned | Unassigned | Unassigned | 1384_0 | Clustered           | 14 VC_1384_0  | 14  | 0.829  | 1          | 0.829  | 0 | 0 | 0 | 1 Ref |
| OM869592 | Unassigned | Unassigned | Unassigned | 1366_0 | Clustered           | 7 VC_1366_0   | 7   | 0.7919 | 0.99999998 | 0.7919 | 0 | 0 | 0 | 1 Ref |
| OM869593 | Unassigned | Unassigned | Unassigned | 1535_0 | Clustered           | 4 VC_1535_0   | 4   | 1      | 1          | 1      | 0 | 0 | 0 | 1 Ref |
| OM869594 | Unassigned | Unassigned | Unassigned | 1544_0 | Clustered           | 2 VC_1544_0   | 2   | 1      | 1          | 1      | 0 | 0 | 0 | 1 Ref |
| OM869604 | Unassigned | Unassigned | Unassigned | 1369_0 | Clustered           | 10 VC_1369_0  | 10  | 0.6223 | 0.95845085 | 0.5964 | 0 | 0 | 0 | 1 Ref |
| OM869606 | Unassigned | Unassigned | Unassigned | 1145_0 | Clustered           | 164 VC_1145_0 | 164 | 0.8868 | 1          | 0.8868 | 0 | 0 | 0 | 1 Ref |
| OM869610 | Unassigned | Unassigned | Unassigned | 1267_0 | Clustered           | 26 VC_1267_0  | 26  | 0.9597 | 0.99999998 | 0.9597 | 0 | 0 | 0 | 1 Ref |
| OM869623 | Unassigned | Unassigned | Unassigned | 1346_0 | Clustered           | 25 VC_1346_0  | 25  | 1      | 1          | 1      | 0 | 0 | 0 | 1 Ref |
| OM869624 | Unassigned | Unassigned | Unassigned | 1095_0 | Clustered           | 12 VC_1095_0  | 12  | 0.2819 | 0.99837092 | 0.2814 | 0 | 0 | 0 | 1 Ref |
| OM869626 | Unassigned | Unassigned | Unassigned | 1372_0 | Clustered           | 2 VC_1372_0   | 2   | 0.3093 | 0.72985431 | 0.2257 | 0 | 0 | 0 | 1 Ref |
| OM869631 | Unassigned | Unassigned | Unassigned | 1163_0 | Clustered/Singleton | 1 VC_1163_0   | 1   | 0      | 1          | 0      | 0 | 0 | 0 | 1 Ref |
| OM869632 | Unassigned | Unassigned | Unassigned | 1460_0 | Clustered           | 2 VC_1460_0   | 2   | 1      | 1          | 1      | 0 | 0 | 0 | 1 Ref |
| OM869633 | Unassigned | Unassigned | Unassigned | 1369_0 | Clustered           | 10 VC_1369_0  | 10  | 0.6223 | 0.95845085 | 0.5964 | 0 | 0 | 0 | 1 Ref |
| OM869634 | Unassigned | Unassigned | Unassigned | 1186_0 | Clustered           | 5 VC_1186_0   | 5   | 0.8799 | 0.99921062 | 0.8792 | 0 | 0 | 0 | 1 Ref |
| OM869635 | Unassigned | Unassigned | Unassigned | 1145_0 | Clustered           | 164 VC_1145_0 | 164 | 0.8868 | 1          | 0.8868 | 0 | 0 | 0 | 1 Ref |
| OM869637 | Unassigned | Unassigned | Unassigned | 1186_0 | Clustered           | 5 VC_1186_0   | 5   | 0.8799 | 0.99921062 | 0.8792 | 0 | 0 | 0 | 1 Ref |
| OM869638 | Unassigned | Unassigned | Unassigned | 1384_0 | Clustered           | 14 VC_1384_0  | 14  | 0.829  | 1          | 0.829  | 0 | 0 | 0 | 1 Ref |
| OM869639 | Unassigned | Unassigned | Unassigned | 1395_0 | Clustered           | 2 VC_1395_0   | 2   | 0.4381 | 0.9197097  | 0.4029 | 0 | 0 | 0 | 1 Ref |
| OM869640 | Unassigned | Unassigned | Unassigned | 1174_0 | Clustered           | 4 VC_1174_0   | 4   | 0.1295 | 0.97665214 | 0.1265 | 0 | 0 | 0 | 1 Ref |
| OM869641 | Unassigned | Unassigned | Unassigned | 1145_0 | Clustered           | 164 VC_1145_0 | 164 | 0.8868 | 1          | 0.8868 | 0 | 0 | 0 | 1 Ref |
| OM869642 | Unassigned | Unassigned | Unassigned | 1145_0 | Clustered           | 164 VC_1145_0 | 164 | 0.8868 | 1          | 0.8868 | 0 | 0 | 0 | 1 Ref |
| OM869643 | Unassigned | Unassigned | Unassigned | 1145_0 | Clustered           | 164 VC_1145_0 | 164 | 0.8868 | 1          | 0.8868 | 0 | 0 | 0 | 1 Ref |
| OM869644 | Unassigned | Unassigned | Unassigned | 1145_0 | Clustered           | 164 VC_1145_0 | 164 | 0.8868 | 1          | 0.8868 | 0 | 0 | 0 | 1 Ref |
| OM869645 | Unassigned | Unassigned | Unassigned | 1145_0 | Clustered           | 164 VC_1145_0 | 164 | 0.8868 | 1          | 0.8868 | 0 | 0 | 0 | 1 Ref |
| OM869646 | Unassigned | Unassigned | Unassigned | 1283_0 | Clustered           | 2 VC_1283_0   | 2   | 0.1479 | 0.71150042 | 0.1053 | 0 | 0 | 0 | 1 Ref |
| OM869648 | Unassigned | Unassigned | Unassigned | 1375_0 | Clustered           | 12 VC_1375_0  | 12  | 0.7378 | 0.86590481 | 0.6389 | 0 | 0 | 0 | 1 Ref |
| OM869650 | Unassigned | Unassigned | Unassigned | 1299_0 | Clustered           | 53 VC_1299_0  | 53  | 0.8666 | 1          | 0.8666 | 0 | 0 | 0 | 1 Ref |
| OM869651 | Unassigned | Unassigned | Unassigned | 1358_0 | Clustered/Singleton | 1 VC_1358_0   | 1   | 0      | 1          | 0      | 0 | 0 | 0 | 1 Ref |
| OM869653 | Unassigned | Unassigned | Unassigned | 1366_0 | Clustered           | 7 VC_1366_0   | 7   | 0.7919 | 0.99999998 | 0.7919 | 0 | 0 | 0 | 1 Ref |
| OM869654 | Unassigned | Unassigned | Unassigned | 1375_0 | Clustered           | 12 VC_1375_0  | 12  | 0.7378 | 0.86590481 | 0.6389 | 0 | 0 | 0 | 1 Ref |
| OM869655 | Unassigned | Unassigned | Unassigned | 1375_0 | Clustered           | 12 VC_1375_0  | 12  | 0.7378 | 0.86590481 | 0.6389 | 0 | 0 | 0 | 1 Ref |
| OM869659 | Unassigned | Unassigned | Unassigned | 1455_0 | Clustered           | 3 VC_1455_0   | 3   | 0.8292 | 0.5        | 0.4146 | 0 | 0 | 0 | 1 Ref |
| OM869663 | Unassigned | Unassigned | Unassigned | 1152_0 | Clustered           | 26 VC_1152_0  | 26  | 0.6685 | 1          | 0.6685 | 0 | 0 | 0 | 1 Ref |
| OM869664 | Unassigned | Unassigned | Unassigned | 1145_0 | Clustered           | 164 VC_1145_0 | 164 | 0.8868 | 1          | 0.8868 | 0 | 0 | 0 | 1 Ref |
| OM869666 | Unassigned | Unassigned | Unassigned | 1375_0 | Clustered           | 12 VC_1375_0  | 12  | 0.7378 | 0.86590481 | 0.6389 | 0 | 0 | 0 | 1 Ref |
| OM869668 | Unassigned | Unassigned | Unassigned | 1335_0 | Clustered           | 13 VC_1335_0  | 13  | 0.7519 | 1          | 0.7519 | 0 | 0 | 0 | 1 Ref |
| OM869669 | Unassigned | Unassigned | Unassigned | 1535_0 | Clustered           | 4 VC_1535_0   | 4   | 1      | 1          | 1      | 0 | 0 | 0 | 1 Ref |
| OM869672 | Unassigned | Unassigned | Unassigned | 1543_0 | Clustered           | 3 VC_1543_0   | 3   | 1      | 1          | 1      | 0 | 0 | 0 | 1 Ref |
| OM869679 | Unassigned | Unassigned | Unassigned | 1395_0 | Clustered           | 2 VC_1395_0   | 2   | 0.4381 | 0.9197097  | 0.4029 | 0 | 0 | 0 | 1 Ref |
| OM869684 | Unassigned | Unassigned | Unassigned | 1375_0 | Clustered           | 12 VC_1375_0  | 12  | 0.7378 | 0.86590481 | 0.6389 | 0 | 0 | 0 | 1 Ref |



|          |            |            |            |        |                     |               |     |        |            |        |   |   |   |            |
|----------|------------|------------|------------|--------|---------------------|---------------|-----|--------|------------|--------|---|---|---|------------|
| OM869688 | Unassigned | Unassigned | Unassigned | 1543_0 | Clustered           | 3 VC_1543_0   | 3   | 1      | 1          | 1      | 0 | 0 | 0 | 1 Ref      |
| OM869696 | Unassigned | Unassigned | Unassigned | 1364_0 | Clustered           | 6 VC_1364_0   | 6   | 0.9472 | 0.54366909 | 0.515  | 0 | 0 | 0 | 1 Ref      |
| OM869697 | Unassigned | Unassigned | Unassigned | 1145_0 | Clustered           | 164 VC_1145_0 | 164 | 0.8868 | 1          | 0.8868 | 0 | 0 | 0 | 1 Ref      |
| OM869698 | Unassigned | Unassigned | Unassigned | 1145_0 | Clustered           | 164 VC_1145_0 | 164 | 0.8868 | 1          | 0.8868 | 0 | 0 | 0 | 1 Ref      |
| OM869699 | Unassigned | Unassigned | Unassigned | 1145_0 | Clustered           | 164 VC_1145_0 | 164 | 0.8868 | 1          | 0.8868 | 0 | 0 | 0 | 1 Ref      |
| OM869700 | Unassigned | Unassigned | Unassigned | 1145_0 | Clustered           | 164 VC_1145_0 | 164 | 0.8868 | 1          | 0.8868 | 0 | 0 | 0 | 1 Ref      |
| OM869701 | Unassigned | Unassigned | Unassigned | 1145_0 | Clustered           | 164 VC_1145_0 | 164 | 0.8868 | 1          | 0.8868 | 0 | 0 | 0 | 1 Ref      |
| OM869702 | Unassigned | Unassigned | Unassigned | 1100_0 | Clustered           | 2 VC_1100_0   | 2   | 0.5133 | 0.81445332 | 0.4181 | 0 | 0 | 0 | 1 Ref      |
| OM869703 | Unassigned | Unassigned | Unassigned | 1145_0 | Clustered           | 164 VC_1145_0 | 164 | 0.8868 | 1          | 0.8868 | 0 | 0 | 0 | 1 Ref      |
| OM869704 | Unassigned | Unassigned | Unassigned | 1145_0 | Clustered           | 164 VC_1145_0 | 164 | 0.8868 | 1          | 0.8868 | 0 | 0 | 0 | 1 Ref      |
| OM869706 | Unassigned | Unassigned | Unassigned | 1532_0 | Clustered           | 2 VC_1532_0   | 2   | 1      | 1          | 1      | 0 | 0 | 0 | 1 Ref      |
| OM869707 | Unassigned | Unassigned | Unassigned | 1384_0 | Clustered           | 14 VC_1384_0  | 14  | 0.829  | 1          | 0.829  | 0 | 0 | 0 | 1 Ref      |
| OM869708 | Unassigned | Unassigned | Unassigned | 1533_0 | Clustered           | 3 VC_1533_0   | 3   | 0.7832 | 0.96173875 | 0.7532 | 0 | 0 | 0 | 1 Ref      |
| OM869709 | Unassigned | Unassigned | Unassigned | 1241_0 | Clustered           | 13 VC_1241_0  | 13  | 0.8675 | 0.76044592 | 0.6597 | 0 | 0 | 0 | 1 Ref      |
| OM869711 | Unassigned | Unassigned | Unassigned | 1437_0 | Clustered           | 5 VC_1437_0   | 5   | 0.7338 | 0.52463554 | 0.385  | 0 | 0 | 0 | 1 Ref      |
| OM869712 | Unassigned | Unassigned | Unassigned | 1535_0 | Clustered           | 4 VC_1535_0   | 4   | 1      | 1          | 1      | 0 | 0 | 0 | 1 Ref      |
| OM869713 | Unassigned | Unassigned | Unassigned | 1544_0 | Clustered           | 2 VC_1544_0   | 2   | 1      | 1          | 1      | 0 | 0 | 0 | 1 Ref      |
| OM892879 | Unassigned | Unassigned | Unassigned | 365_0  | Clustered           | 6 VC_365_0    | 6   | 0.5395 | 1          | 0.5395 | 0 | 0 | 0 | 1 Ref      |
| OM897575 | Unassigned | Unassigned | Unassigned | 800_0  | Clustered           | 4 VC_800_0    | 4   | 0.8098 | 0.99985435 | 0.8096 | 0 | 0 | 0 | 1 Ref      |
| OM908436 | Unassigned | Unassigned | Unassigned | 465_0  | Clustered           | 80 VC_465_0   | 80  | 0.9988 | 1          | 0.9988 | 0 | 0 | 0 | 1 Ref      |
| OM908766 | Unassigned | Unassigned | Unassigned | 802_0  | Clustered           | 8 VC_802_0    | 8   | 0.5141 | 1          | 0.5141 | 0 | 0 | 0 | 1 Ref      |
| OM913584 | Unassigned | Unassigned | Unassigned | 243_0  | Clustered           | 72 VC_243_0   | 72  | 0.8089 | 1          | 0.8089 | 0 | 0 | 0 | 1 Ref      |
| OM913585 | Unassigned | Unassigned | Unassigned | 230_0  | Clustered           | 38 VC_230_0   | 38  | 0.9076 | 1          | 0.9076 | 0 | 0 | 0 | 1 Ref      |
| OM913586 | Unassigned | Unassigned | Unassigned | 1206_0 | Clustered           | 3 VC_1206_0   | 3   | 0.0882 | 0.99850608 | 0.088  | 0 | 0 | 0 | 1 Ref      |
| OM913587 | Unassigned | Unassigned | Unassigned | 1424_0 | Clustered           | 31 VC_1424_0  | 31  | 0.8834 | 1          | 0.8834 | 0 | 0 | 0 | 1 Ref      |
| OM913597 | Unassigned | Unassigned | Unassigned | 165_0  | Clustered           | 2 VC_165_0    | 2   | 0.1318 | 0.95631278 | 0.126  | 0 | 0 | 0 | 1 Ref      |
| OM913598 | Unassigned | Unassigned | Unassigned | 165_0  | Clustered           | 2 VC_165_0    | 2   | 0.1318 | 0.95631278 | 0.126  | 0 | 0 | 0 | 1 Ref      |
| OM913894 | Unassigned | Unassigned | Unassigned | 115_0  | Clustered           | 9 VC_115_0    | 9   | 0.5166 | 1          | 0.5166 | 0 | 0 | 0 | 1 Ref      |
| OM925528 | Unassigned | Unassigned | Unassigned | 714_0  | Clustered           | 71 VC_714_0   | 71  | 0.935  | 1          | 0.935  | 0 | 0 | 0 | 1 Ref      |
| OM937123 | Unassigned | Unassigned | Unassigned | 465_0  | Clustered           | 80 VC_465_0   | 80  | 0.9988 | 1          | 0.9988 | 0 | 0 | 0 | 1 Ref      |
| OM937766 | Unassigned | Unassigned | Unassigned | 862_0  | Clustered           | 29 VC_862_0   | 29  | 0.8594 | 1          | 0.8594 | 0 | 0 | 0 | 1 Ref      |
| OM938991 | Unassigned | Unassigned | Unassigned | 972_0  | Clustered           | 99 VC_972_0   | 99  | 0.9113 | 1          | 0.9113 | 0 | 0 | 0 | 0.9928 Ref |
| OM938992 | Unassigned | Unassigned | Unassigned | 972_0  | Clustered           | 99 VC_972_0   | 99  | 0.9113 | 1          | 0.9113 | 0 | 0 | 0 | 0.9928 Ref |
| OM953433 | Unassigned | Unassigned | Unassigned | 341_0  | Clustered           | 27 VC_341_0   | 27  | 0.5058 | 1          | 0.5058 | 0 | 0 | 0 | 0.8661 Ref |
| OM953790 | Unassigned | Unassigned | Unassigned | 80_0   | Clustered           | 64 VC_80_0    | 64  | 0.418  | 1          | 0.418  | 0 | 0 | 0 | 0.7649 Ref |
| OM960734 | Unassigned | Unassigned | Unassigned | 293_1  | Clustered           | 21 VC_293_1   | 21  | 0.1694 | 1          | 0.1694 | 0 | 0 | 0 | 0.9048 Ref |
| OM962092 | Unassigned | Unassigned | Unassigned | 610_0  | Clustered           | 14 VC_610_0   | 14  | 0.5159 | 1          | 0.5159 | 0 | 0 | 0 | 1 Ref      |
| OM964875 | Unassigned | Unassigned | Unassigned | 972_0  | Clustered           | 99 VC_972_0   | 99  | 0.9113 | 1          | 0.9113 | 0 | 0 | 0 | 0.9928 Ref |
| OM966901 | Unassigned | Unassigned | Unassigned | 94_0   | Clustered           | 22 VC_94_0    | 22  | 0.5602 | 1          | 0.5602 | 0 | 0 | 0 | 1 Ref      |
| OM971648 | Unassigned | Unassigned | Unassigned | 686_0  | Clustered           | 25 VC_686_0   | 25  | 0.5501 | 1          | 0.5501 | 0 | 0 | 0 | 0.96 Ref   |
| OM971649 | Unassigned | Unassigned | Unassigned | 686_0  | Clustered           | 25 VC_686_0   | 25  | 0.5501 | 1          | 0.5501 | 0 | 0 | 0 | 0.96 Ref   |
| OM982619 | Unassigned | Unassigned | Unassigned | 1000_0 | Clustered           | 2 VC_1000_0   | 2   | 0.2337 | 0.95692166 | 0.2237 | 0 | 0 | 0 | 1 Ref      |
| OM982620 | Unassigned | Unassigned | Unassigned | 79_5   | Clustered           | 6 VC_79_5     | 6   | 0.1083 | 0.99974986 | 0.1083 | 0 | 0 | 0 | 1 Ref      |
| OM982621 | Unassigned | Unassigned | Unassigned | 600_1  | Clustered/Singleton | 1 VC_600_1    | 1   | 0      | 1          | 0      | 0 | 0 | 0 | 1 Ref      |
| OM982646 | Unassigned | Unassigned | Unassigned | 801_0  | Clustered           | 37 VC_801_0   | 37  | 0.5672 | 1          | 0.5672 | 0 | 0 | 0 | 1 Ref      |
| OM982647 | Unassigned | Unassigned | Unassigned | 293_10 | Clustered           | 9 VC_293_10   | 9   | 0.0615 | 0.99999884 | 0.0615 | 0 | 0 | 0 | 0.6667 Ref |
| OM982668 | Unassigned | Unassigned | Unassigned | 87_3   | Clustered           | 19 VC_87_3    | 19  | 0.3645 | 1          | 0.3645 | 0 | 0 | 0 | 0.807 Ref  |
| OM982669 | Unassigned | Unassigned | Unassigned | 87_3   | Clustered           | 19 VC_87_3    | 19  | 0.3645 | 1          | 0.3645 | 0 | 0 | 0 | 0.807 Ref  |
| OM982670 | Unassigned | Unassigned | Unassigned | 87_3   | Clustered           | 19 VC_87_3    | 19  | 0.3645 | 1          | 0.3645 | 0 | 0 | 0 | 0.807 Ref  |
| OM982671 | Unassigned | Unassigned | Unassigned | 87_3   | Clustered           | 19 VC_87_3    | 19  | 0.3645 | 1          | 0.3645 | 0 | 0 | 0 | 0.807 Ref  |
| OM982672 | Unassigned | Unassigned | Unassigned | 87_3   | Clustered           | 19 VC_87_3    | 19  | 0.3645 | 1          | 0.3645 | 0 | 0 | 0 | 0.807 Ref  |
| OM982673 | Unassigned | Unassigned | Unassigned | 87_3   | Clustered           | 19 VC_87_3    | 19  | 0.3645 | 1          | 0.3645 | 0 | 0 | 0 | 0.807 Ref  |
| OM982674 | Unassigned | Unassigned | Unassigned | 87_3   | Clustered           | 19 VC_87_3    | 19  | 0.3645 | 1          | 0.3645 | 0 | 0 | 0 | 0.807 Ref  |
| ON000910 | Unassigned | Unassigned | Unassigned | 549_0  | Clustered           | 9 VC_549_0    | 9   | 0.2597 | 1          | 0.2597 | 0 | 0 | 0 | 1 Ref      |
| ON001686 | Unassigned | Unassigned | Unassigned | 655_0  | Clustered           | 45 VC_655_0   | 45  | 0.7722 | 1          | 0.7722 | 0 | 0 | 0 | 1 Ref      |
| ON005621 | Unassigned | Unassigned | Unassigned | 175_0  | Clustered           | 20 VC_175_0   | 20  | 0.7504 | 1          | 0.7504 | 0 | 0 | 0 | 1 Ref      |
| ON014753 | Unassigned | Unassigned | Unassigned | 1545_0 | Clustered           | 2 VC_1545_0   | 2   | 1      | 1          | 1      | 0 | 0 | 0 | 1 Ref      |
| ON014754 | Unassigned | Unassigned | Unassigned | 1503_0 | Clustered           | 2 VC_1503_0   | 2   | 1      | 1          | 1      | 0 | 0 | 0 | 1 Ref      |
| ON014755 | Unassigned | Unassigned | Unassigned | 482_0  | Clustered           | 4 VC_482_0    | 4   | 0.1424 | 0.99998478 | 0.1424 | 0 | 0 | 0 | 1 Ref      |
| ON014757 | Unassigned | Unassigned | Unassigned | 1545_0 | Clustered           | 2 VC_1545_0   | 2   | 1      | 1          | 1      | 0 | 0 | 0 | 1 Ref      |
| ON015836 | Unassigned | Unassigned | Unassigned | 935_1  | Clustered           | 4 VC_935_1    | 4   | 0.1471 | 0.99997723 | 0.1471 | 0 | 0 | 0 | 1 Ref      |
| ON018986 | Unassigned | Unassigned | Unassigned | 254_0  | Clustered           | 14 VC_254_0   | 14  | 0.9118 | 1          | 0.9118 | 0 | 0 | 0 | 0.967 Ref  |
| ON036882 | Unassigned | Unassigned | Unassigned | 713_0  | Clustered           | 26 VC_713_0   | 26  | 0.9358 | 1          | 0.9358 | 0 | 0 | 0 | 1 Ref      |
| ON036883 | Unassigned | Unassigned | Unassigned | 713_0  | Clustered           | 26 VC_713_0   | 26  | 0.9358 | 1          | 0.9358 | 0 | 0 | 0 | 1 Ref      |
| ON042478 | Unassigned | Unassigned | Unassigned | 619_0  | Clustered           | 3 VC_619_0    | 3   | 0.054  | 0.97294713 | 0.0526 | 0 | 0 | 0 | 1 Ref      |
| ON042750 | Unassigned | Unassigned | Unassigned | 842_0  | Clustered           | 14 VC_842_0   | 14  | 0.6581 | 1          | 0.6581 | 0 | 0 | 0 | 1 Ref      |
| ON045001 | Unassigned | Unassigned | Unassigned | 605_0  | Clustered           | 3 VC_605_0    | 3   | 0.0492 | 0.99859933 | 0.0491 | 0 | 0 | 0 | 1 Ref      |
| ON080940 | Unassigned | Unassigned | Unassigned | 861_0  | Clustered           | 29 VC_861_0   | 29  | 0.9954 | 1          | 0.9954 | 0 | 0 | 0 | 1 Ref      |
| ON080941 | Unassigned | Unassigned | Unassigned | 861_0  | Clustered           | 29 VC_861_0   | 29  | 0.9954 | 1          | 0.9954 | 0 | 0 | 0 | 1 Ref      |
| ON081052 | Unassigned | Unassigned | Unassigned | 470_0  | Clustered           | 62 VC_470_0   | 62  | 0.902  | 1          | 0.902  | 0 | 0 | 0 | 1 Ref      |
| ON081328 | Unassigned | Unassigned | Unassigned | 1424_0 | Clustered           | 31 VC_1424_0  | 31  | 0.8834 | 1          | 0.8834 | 0 | 0 | 0 | 1 Ref      |
| ON081329 | Unassigned | Unassigned | Unassigned | 243_0  | Clustered           | 72 VC_243_0   | 72  | 0.8089 | 1          | 0.8089 | 0 | 0 | 0 | 1 Ref      |
| ON081330 | Unassigned | Unassigned | Unassigned | 1415_0 | Clustered           | 31 VC_1415_0  | 31  | 0.8456 | 1          | 0.8456 | 0 | 0 | 0 | 1 Ref      |
| ON081331 | Unassigned | Unassigned | Unassigned | 243_0  | Clustered           | 72 VC_243_0   | 72  | 0.8089 | 1          | 0.8089 | 0 | 0 | 0 | 1 Ref      |
| ON081332 | Unassigned | Unassigned | Unassigned | 1136_0 | Clustered           | 40 VC_1136_0  | 40  | 0.8746 | 1          | 0.8746 | 0 | 0 | 0 | 1 Ref      |
| ON081333 | Unassigned | Unassigned | Unassigned | 528_0  | Clustered           | 12 VC_528_0   | 12  | 0.3923 | 1          | 0.3923 | 0 | 0 | 0 | 0.9697 Ref |
| ON081334 | Unassigned | Unassigned | Unassigned | 1407_0 | Clustered           | 78 VC_1407_0  | 78  | 0.9731 | 1          | 0.9731 | 0 | 0 | 0 | 1 Ref      |
| ON081335 | Unassigned | Unassigned | Unassigned | 579_20 | Clustered           | 17 VC_579_20  | 17  | 0.0538 | 1          | 0.0538 | 0 | 0 | 0 | 0.9926 Ref |
| ON086804 | Unassigned | Unassigned | Unassigned | 125_0  | Clustered           | 23 VC_125_0   | 23  | 0.8163 | 1          | 0.8163 | 0 | 0 | 0 | 1 Ref      |
| ON086985 | Unassigned | Unassigned | Unassigned | 110_0  | Clustered           | 33 VC_110_0   | 33  | 0.9488 | 1          | 0.9488 | 0 | 0 | 0 | 1 Ref      |
| ON107264 | Unassigned | Unassigned | Unassigned | 91_4   | Clustered/Singleton | 1 VC_91_4     | 1   | 0      | 1          | 0      | 0 | 0 | 0 | 1 Ref      |



|          |            |            |            |        |                     |              |     |        |            |        |   |   |   |            |
|----------|------------|------------|------------|--------|---------------------|--------------|-----|--------|------------|--------|---|---|---|------------|
| ONI08640 | Unassigned | Unassigned | Unassigned | 228_0  | Clustered           | 22 VC_228_0  | 22  | 0.7411 | 1          | 0.7411 | 0 | 0 | 0 | 1 Ref      |
| ONI08642 | Unassigned | Unassigned | Unassigned | 1407_0 | Clustered           | 78 VC_1407_0 | 78  | 0.9731 | 1          | 0.9731 | 0 | 0 | 0 | 1 Ref      |
| ONI08643 | Unassigned | Unassigned | Unassigned | 593_0  | Clustered           | 2 VC_593_0   | 2   | 0.1092 | 0.95639188 | 0.1045 | 0 | 0 | 0 | 1 Ref      |
| ONI08644 | Unassigned | Unassigned | Unassigned | 528_0  | Clustered           | 12 VC_528_0  | 12  | 0.3923 | 1          | 0.3923 | 0 | 0 | 0 | 0.9697 Ref |
| ONI08645 | Unassigned | Unassigned | Unassigned | 594_0  | Clustered           | 7 VC_594_0   | 7   | 0.2725 | 1          | 0.2725 | 0 | 0 | 0 | 1 Ref      |
| ONI08646 | Unassigned | Unassigned | Unassigned | 901_0  | Clustered           | 31 VC_901_0  | 31  | 0.8235 | 1          | 0.8235 | 0 | 0 | 0 | 0.8194 Ref |
| ONI08647 | Unassigned | Unassigned | Unassigned | 1278_0 | Clustered           | 19 VC_1278_0 | 19  | 1      | 1          | 1      | 0 | 0 | 0 | 1 Ref      |
| ONI08648 | Unassigned | Unassigned | Unassigned | 1407_0 | Clustered           | 78 VC_1407_0 | 78  | 0.9731 | 1          | 0.9731 | 0 | 0 | 0 | 1 Ref      |
| ONI08649 | Unassigned | Unassigned | Unassigned | 589_0  | Clustered           | 3 VC_589_0   | 3   | 0.2072 | 0.99849937 | 0.2069 | 0 | 0 | 0 | 1 Ref      |
| ONI08650 | Unassigned | Unassigned | Unassigned | 1114_3 | Clustered           | 16 VC_1114_3 | 16  | 0.2336 | 1          | 0.2336 | 0 | 0 | 0 | 0.9667 Ref |
| ONI08651 | Unassigned | Unassigned | Unassigned | 701_0  | Clustered           | 16 VC_701_0  | 16  | 0.2957 | 1          | 0.2957 | 0 | 0 | 0 | 0.9167 Ref |
| ONI09291 | Unassigned | Unassigned | Unassigned | 132_0  | Clustered           | 19 VC_132_0  | 19  | 0.6051 | 1          | 0.6051 | 0 | 0 | 0 | 1 Ref      |
| ONI13167 | Unassigned | Unassigned | Unassigned | 93_0   | Clustered           | 22 VC_93_0   | 22  | 0.5285 | 1          | 0.5285 | 0 | 0 | 0 | 1 Ref      |
| ONI13168 | Unassigned | Unassigned | Unassigned | 93_0   | Clustered           | 22 VC_93_0   | 22  | 0.5285 | 1          | 0.5285 | 0 | 0 | 0 | 1 Ref      |
| ONI13169 | Unassigned | Unassigned | Unassigned | 93_0   | Clustered           | 22 VC_93_0   | 22  | 0.5285 | 1          | 0.5285 | 0 | 0 | 0 | 1 Ref      |
| ONI13170 | Unassigned | Unassigned | Unassigned | 94_0   | Clustered           | 22 VC_94_0   | 22  | 0.5602 | 1          | 0.5602 | 0 | 0 | 0 | 1 Ref      |
| ONI13171 | Unassigned | Unassigned | Unassigned | 110_0  | Clustered           | 33 VC_110_0  | 33  | 0.9488 | 1          | 0.9488 | 0 | 0 | 0 | 1 Ref      |
| ONI13172 | Unassigned | Unassigned | Unassigned | 110_0  | Clustered           | 33 VC_110_0  | 33  | 0.9488 | 1          | 0.9488 | 0 | 0 | 0 | 1 Ref      |
| ONI13173 | Unassigned | Unassigned | Unassigned | 110_0  | Clustered           | 33 VC_110_0  | 33  | 0.9488 | 1          | 0.9488 | 0 | 0 | 0 | 1 Ref      |
| ONI13174 | Unassigned | Unassigned | Unassigned | 110_0  | Clustered           | 33 VC_110_0  | 33  | 0.9488 | 1          | 0.9488 | 0 | 0 | 0 | 1 Ref      |
| ONI13175 | Unassigned | Unassigned | Unassigned | 110_0  | Clustered           | 33 VC_110_0  | 33  | 0.9488 | 1          | 0.9488 | 0 | 0 | 0 | 1 Ref      |
| ONI13176 | Unassigned | Unassigned | Unassigned | 711_0  | Clustered           | 48 VC_711_0  | 48  | 0.8217 | 1          | 0.8217 | 0 | 0 | 0 | 1 Ref      |
| ONI13177 | Unassigned | Unassigned | Unassigned | 110_0  | Clustered           | 33 VC_110_0  | 33  | 0.9488 | 1          | 0.9488 | 0 | 0 | 0 | 1 Ref      |
| ONI13178 | Unassigned | Unassigned | Unassigned | 110_0  | Clustered           | 33 VC_110_0  | 33  | 0.9488 | 1          | 0.9488 | 0 | 0 | 0 | 1 Ref      |
| ONI13179 | Unassigned | Unassigned | Unassigned | 110_0  | Clustered           | 33 VC_110_0  | 33  | 0.9488 | 1          | 0.9488 | 0 | 0 | 0 | 1 Ref      |
| ONI13180 | Unassigned | Unassigned | Unassigned | 110_0  | Clustered           | 33 VC_110_0  | 33  | 0.9488 | 1          | 0.9488 | 0 | 0 | 0 | 1 Ref      |
| ONI13181 | Unassigned | Unassigned | Unassigned | 1004_0 | Clustered           | 4 VC_1004_0  | 4   | 0.2949 | 0.99997642 | 0.2949 | 0 | 0 | 0 | 1 Ref      |
| ONI13334 | Unassigned | Unassigned | Unassigned | 711_0  | Clustered           | 48 VC_711_0  | 48  | 0.8217 | 1          | 0.8217 | 0 | 0 | 0 | 1 Ref      |
| ONI13344 | Unassigned | Unassigned | Unassigned | 155_1  | Clustered           | 3 VC_155_1   | 3   | 0.0127 | 0.99282456 | 0.0126 | 0 | 0 | 0 | 1 Ref      |
| ONI17106 | Unassigned | Unassigned | Unassigned | 650_1  | Clustered           | 6 VC_650_1   | 6   | 0.4186 | 1          | 0.4186 | 0 | 0 | 0 | 1 Ref      |
| ONI25307 | Unassigned | Unassigned | Unassigned | 94_0   | Clustered           | 22 VC_94_0   | 22  | 0.5602 | 1          | 0.5602 | 0 | 0 | 0 | 1 Ref      |
| ONI32389 | Unassigned | Unassigned | Unassigned | 113_0  | Clustered           | 91 VC_113_0  | 91  | 0.9584 | 1          | 0.9584 | 0 | 0 | 0 | 1 Ref      |
| ONI33270 | Unassigned | Unassigned | Unassigned | 489_0  | Clustered           | 3 VC_489_0   | 3   | 0.0782 | 0.99801323 | 0.078  | 0 | 0 | 0 | 1 Ref      |
| ONI35435 | Unassigned | Unassigned | Unassigned | 3_0    | Clustered           | 17 VC_3_0    | 17  | 0.5615 | 1          | 0.5615 | 0 | 0 | 0 | 1 Ref      |
| ONI46439 | Unassigned | Unassigned | Unassigned | 235_0  | Clustered           | 60 VC_235_0  | 60  | 0.9413 | 1          | 0.9413 | 0 | 0 | 0 | 1 Ref      |
| ONI46440 | Unassigned | Unassigned | Unassigned | 235_0  | Clustered           | 60 VC_235_0  | 60  | 0.9413 | 1          | 0.9413 | 0 | 0 | 0 | 1 Ref      |
| ONI46449 | Unassigned | Unassigned | Unassigned | 113_0  | Clustered           | 91 VC_113_0  | 91  | 0.9584 | 1          | 0.9584 | 0 | 0 | 0 | 1 Ref      |
| ONI48527 | Unassigned | Unassigned | Unassigned | 466_0  | Clustered           | 66 VC_466_0  | 66  | 0.9246 | 1          | 0.9246 | 0 | 0 | 0 | 1 Ref      |
| ONI48528 | Unassigned | Unassigned | Unassigned | 848_0  | Clustered           | 124 VC_848_0 | 124 | 0.9484 | 1          | 0.9484 | 0 | 0 | 0 | 1 Ref      |
| ONI48529 | Unassigned | Unassigned | Unassigned | 848_0  | Clustered           | 124 VC_848_0 | 124 | 0.9484 | 1          | 0.9484 | 0 | 0 | 0 | 1 Ref      |
| ONI56559 | Unassigned | Unassigned | Unassigned | 486_0  | Clustered           | 47 VC_486_0  | 47  | 0.9022 | 1          | 0.9022 | 0 | 0 | 0 | 1 Ref      |
| ONI57416 | Unassigned | Unassigned | Unassigned | 687_0  | Clustered           | 21 VC_687_0  | 21  | 0.3608 | 1          | 0.3608 | 0 | 0 | 0 | 1 Ref      |
| ONI65415 | Unassigned | Unassigned | Unassigned | 113_0  | Clustered           | 91 VC_113_0  | 91  | 0.9584 | 1          | 0.9584 | 0 | 0 | 0 | 1 Ref      |
| ONI65687 | Unassigned | Unassigned | Unassigned | 172_0  | Clustered           | 26 VC_172_0  | 26  | 0.7909 | 1          | 0.7909 | 0 | 0 | 0 | 1 Ref      |
| ONI67532 | Unassigned | Unassigned | Unassigned | 654_0  | Clustered           | 115 VC_654_0 | 115 | 0.7303 | 1          | 0.7303 | 0 | 0 | 0 | 0.8764 Ref |
| ONI69961 | Unassigned | Unassigned | Unassigned | 135_50 | Clustered/Singleton | 1 VC_135_50  | 1   | 0      | 1          | 0      | 0 | 0 | 0 | 1 Ref      |
| ONI69962 | Unassigned | Unassigned | Unassigned | 135_51 | Clustered/Singleton | 1 VC_135_51  | 1   | 0      | 1          | 0      | 0 | 0 | 0 | 1 Ref      |
| ONI69963 | Unassigned | Unassigned | Unassigned | 135_49 | Clustered/Singleton | 1 VC_135_49  | 1   | 0      | 1          | 0      | 0 | 0 | 0 | 1 Ref      |
| ONI69972 | Unassigned | Unassigned | Unassigned | 77_0   | Clustered           | 37 VC_77_0   | 37  | 0.9392 | 1          | 0.9392 | 0 | 0 | 0 | 1 Ref      |
| ONI70017 | Unassigned | Unassigned | Unassigned | 26_0   | Clustered           | 12 VC_26_0   | 12  | 0.7926 | 1          | 0.7926 | 0 | 0 | 0 | 1 Ref      |
| ONI70019 | Unassigned | Unassigned | Unassigned | 850_0  | Clustered           | 91 VC_850_0  | 91  | 0.9934 | 1          | 0.9934 | 0 | 0 | 0 | 1 Ref      |
| ONI70020 | Unassigned | Unassigned | Unassigned | 54_0   | Clustered           | 87 VC_54_0   | 87  | 0.9858 | 1          | 0.9858 | 0 | 0 | 0 | 1 Ref      |
| ONI70022 | Unassigned | Unassigned | Unassigned | 850_0  | Clustered           | 91 VC_850_0  | 91  | 0.9934 | 1          | 0.9934 | 0 | 0 | 0 | 1 Ref      |
| ONI70023 | Unassigned | Unassigned | Unassigned | 54_0   | Clustered           | 87 VC_54_0   | 87  | 0.9858 | 1          | 0.9858 | 0 | 0 | 0 | 1 Ref      |
| ONI70024 | Unassigned | Unassigned | Unassigned | 370_0  | Clustered           | 53 VC_370_0  | 53  | 0.8972 | 1          | 0.8972 | 0 | 0 | 0 | 1 Ref      |
| ONI70025 | Unassigned | Unassigned | Unassigned | 55_0   | Clustered           | 5 VC_55_0    | 5   | 0.4963 | 0.99999808 | 0.4963 | 0 | 0 | 0 | 1 Ref      |
| ONI70026 | Unassigned | Unassigned | Unassigned | 1_0    | Clustered           | 54 VC_1_0    | 54  | 0.8518 | 1          | 0.8518 | 0 | 0 | 0 | 1 Ref      |
| ONI70027 | Unassigned | Unassigned | Unassigned | 370_0  | Clustered           | 53 VC_370_0  | 53  | 0.8972 | 1          | 0.8972 | 0 | 0 | 0 | 1 Ref      |
| ONI70028 | Unassigned | Unassigned | Unassigned | 850_0  | Clustered           | 91 VC_850_0  | 91  | 0.9934 | 1          | 0.9934 | 0 | 0 | 0 | 1 Ref      |
| ONI70029 | Unassigned | Unassigned | Unassigned | 54_0   | Clustered           | 87 VC_54_0   | 87  | 0.9858 | 1          | 0.9858 | 0 | 0 | 0 | 1 Ref      |
| ONI70030 | Unassigned | Unassigned | Unassigned | 54_0   | Clustered           | 87 VC_54_0   | 87  | 0.9858 | 1          | 0.9858 | 0 | 0 | 0 | 1 Ref      |
| ONI70031 | Unassigned | Unassigned | Unassigned | 370_0  | Clustered           | 53 VC_370_0  | 53  | 0.8972 | 1          | 0.8972 | 0 | 0 | 0 | 1 Ref      |
| ONI70032 | Unassigned | Unassigned | Unassigned | 1_0    | Clustered           | 54 VC_1_0    | 54  | 0.8518 | 1          | 0.8518 | 0 | 0 | 0 | 1 Ref      |
| ONI70033 | Unassigned | Unassigned | Unassigned | 850_0  | Clustered           | 91 VC_850_0  | 91  | 0.9934 | 1          | 0.9934 | 0 | 0 | 0 | 1 Ref      |
| ONI70034 | Unassigned | Unassigned | Unassigned | 54_0   | Clustered           | 87 VC_54_0   | 87  | 0.9858 | 1          | 0.9858 | 0 | 0 | 0 | 1 Ref      |
| ONI70036 | Unassigned | Unassigned | Unassigned | 850_0  | Clustered           | 91 VC_850_0  | 91  | 0.9934 | 1          | 0.9934 | 0 | 0 | 0 | 1 Ref      |
| ONI70037 | Unassigned | Unassigned | Unassigned | 54_0   | Clustered           | 87 VC_54_0   | 87  | 0.9858 | 1          | 0.9858 | 0 | 0 | 0 | 1 Ref      |
| ONI70038 | Unassigned | Unassigned | Unassigned | 850_0  | Clustered           | 91 VC_850_0  | 91  | 0.9934 | 1          | 0.9934 | 0 | 0 | 0 | 1 Ref      |
| ONI70040 | Unassigned | Unassigned | Unassigned | 850_0  | Clustered           | 91 VC_850_0  | 91  | 0.9934 | 1          | 0.9934 | 0 | 0 | 0 | 1 Ref      |
| ONI70041 | Unassigned | Unassigned | Unassigned | 54_0   | Clustered           | 87 VC_54_0   | 87  | 0.9858 | 1          | 0.9858 | 0 | 0 | 0 | 1 Ref      |
| ONI70042 | Unassigned | Unassigned | Unassigned | 26_0   | Clustered           | 12 VC_26_0   | 12  | 0.7926 | 1          | 0.7926 | 0 | 0 | 0 | 1 Ref      |
| ONI70049 | Unassigned | Unassigned | Unassigned | 850_0  | Clustered           | 91 VC_850_0  | 91  | 0.9934 | 1          | 0.9934 | 0 | 0 | 0 | 1 Ref      |
| ONI70050 | Unassigned | Unassigned | Unassigned | 54_0   | Clustered           | 87 VC_54_0   | 87  | 0.9858 | 1          | 0.9858 | 0 | 0 | 0 | 1 Ref      |
| ONI70051 | Unassigned | Unassigned | Unassigned | 26_0   | Clustered           | 12 VC_26_0   | 12  | 0.7926 | 1          | 0.7926 | 0 | 0 | 0 | 1 Ref      |
| ONI70052 | Unassigned | Unassigned | Unassigned | 370_0  | Clustered           | 53 VC_370_0  | 53  | 0.8972 | 1          | 0.8972 | 0 | 0 | 0 | 1 Ref      |
| ONI70053 | Unassigned | Unassigned | Unassigned | 1_0    | Clustered           | 54 VC_1_0    | 54  | 0.8518 | 1          | 0.8518 | 0 | 0 | 0 | 1 Ref      |
| ONI70054 | Unassigned | Unassigned | Unassigned | 850_0  | Clustered           | 91 VC_850_0  | 91  | 0.9934 | 1          | 0.9934 | 0 | 0 | 0 | 1 Ref      |
| ONI70055 | Unassigned | Unassigned | Unassigned | 54_0   | Clustered           | 87 VC_54_0   | 87  | 0.9858 | 1          | 0.9858 | 0 | 0 | 0 | 1 Ref      |
| ONI70056 | Unassigned | Unassigned | Unassigned | 26_0   | Clustered           | 12 VC_26_0   | 12  | 0.7926 | 1          | 0.7926 | 0 | 0 | 0 | 1 Ref      |
| ONI70057 | Unassigned | Unassigned | Unassigned | 370_0  | Clustered           | 53 VC_370_0  | 53  | 0.8972 | 1          | 0.8972 | 0 | 0 | 0 | 1 Ref      |
| ONI70058 | Unassigned | Unassigned | Unassigned | 370_0  | Clustered           | 53 VC_370_0  | 53  | 0.8972 | 1          | 0.8972 | 0 | 0 | 0 | 1 Ref      |



|           |            |            |            |       |           |             |    |        |             |        |   |   |   |       |
|-----------|------------|------------|------------|-------|-----------|-------------|----|--------|-------------|--------|---|---|---|-------|
| QNT170059 | Unassigned | Unassigned | Unassigned | 1_0   | Clustered | 54 VC_1_0   | 54 | 0.8518 | 1           | 0.8518 | 0 | 0 | 0 | 1 Ref |
| QNT170060 | Unassigned | Unassigned | Unassigned | 26_0  | Clustered | 12 VC_26_0  | 12 | 0.7926 | 1           | 0.7926 | 0 | 0 | 0 | 1 Ref |
| QNT170061 | Unassigned | Unassigned | Unassigned | 1_0   | Clustered | 54 VC_1_0   | 54 | 0.8518 | 1           | 0.8518 | 0 | 0 | 0 | 1 Ref |
| QNT170062 | Unassigned | Unassigned | Unassigned | 368_0 | Clustered | 5 VC_368_0  | 5  | 0.5911 | 0.999999979 | 0.5911 | 0 | 0 | 0 | 1 Ref |
| QNT170066 | Unassigned | Unassigned | Unassigned | 26_0  | Clustered | 12 VC_26_0  | 12 | 0.7926 | 1           | 0.7926 | 0 | 0 | 0 | 1 Ref |
| QNT170067 | Unassigned | Unassigned | Unassigned | 1_0   | Clustered | 54 VC_1_0   | 54 | 0.8518 | 1           | 0.8518 | 0 | 0 | 0 | 1 Ref |
| QNT170068 | Unassigned | Unassigned | Unassigned | 370_0 | Clustered | 53 VC_370_0 | 53 | 0.8972 | 1           | 0.8972 | 0 | 0 | 0 | 1 Ref |
| QNT170069 | Unassigned | Unassigned | Unassigned | 55_0  | Clustered | 5 VC_55_0   | 5  | 0.4963 | 0.99999808  | 0.4963 | 0 | 0 | 0 | 1 Ref |
| QNT170070 | Unassigned | Unassigned | Unassigned | 1_0   | Clustered | 54 VC_1_0   | 54 | 0.8518 | 1           | 0.8518 | 0 | 0 | 0 | 1 Ref |
| QNT170071 | Unassigned | Unassigned | Unassigned | 370_0 | Clustered | 53 VC_370_0 | 53 | 0.8972 | 1           | 0.8972 | 0 | 0 | 0 | 1 Ref |
| QNT170072 | Unassigned | Unassigned | Unassigned | 26_0  | Clustered | 12 VC_26_0  | 12 | 0.7926 | 1           | 0.7926 | 0 | 0 | 0 | 1 Ref |
| QNT170073 | Unassigned | Unassigned | Unassigned | 1_0   | Clustered | 54 VC_1_0   | 54 | 0.8518 | 1           | 0.8518 | 0 | 0 | 0 | 1 Ref |
| QNT170074 | Unassigned | Unassigned | Unassigned | 850_0 | Clustered | 91 VC_850_0 | 91 | 0.9934 | 1           | 0.9934 | 0 | 0 | 0 | 1 Ref |
| QNT170075 | Unassigned | Unassigned | Unassigned | 370_0 | Clustered | 53 VC_370_0 | 53 | 0.8972 | 1           | 0.8972 | 0 | 0 | 0 | 1 Ref |
| QNT170076 | Unassigned | Unassigned | Unassigned | 1_0   | Clustered | 54 VC_1_0   | 54 | 0.8518 | 1           | 0.8518 | 0 | 0 | 0 | 1 Ref |
| QNT170077 | Unassigned | Unassigned | Unassigned | 370_0 | Clustered | 53 VC_370_0 | 53 | 0.8972 | 1           | 0.8972 | 0 | 0 | 0 | 1 Ref |
| QNT170078 | Unassigned | Unassigned | Unassigned | 1_0   | Clustered | 54 VC_1_0   | 54 | 0.8518 | 1           | 0.8518 | 0 | 0 | 0 | 1 Ref |
| QNT170079 | Unassigned | Unassigned | Unassigned | 370_0 | Clustered | 53 VC_370_0 | 53 | 0.8972 | 1           | 0.8972 | 0 | 0 | 0 | 1 Ref |
| QNT170080 | Unassigned | Unassigned | Unassigned | 1_0   | Clustered | 54 VC_1_0   | 54 | 0.8518 | 1           | 0.8518 | 0 | 0 | 0 | 1 Ref |
| QNT170081 | Unassigned | Unassigned | Unassigned | 1_0   | Clustered | 54 VC_1_0   | 54 | 0.8518 | 1           | 0.8518 | 0 | 0 | 0 | 1 Ref |
| QNT170082 | Unassigned | Unassigned | Unassigned | 1_0   | Clustered | 54 VC_1_0   | 54 | 0.8518 | 1           | 0.8518 | 0 | 0 | 0 | 1 Ref |
| QNT170084 | Unassigned | Unassigned | Unassigned | 1_0   | Clustered | 54 VC_1_0   | 54 | 0.8518 | 1           | 0.8518 | 0 | 0 | 0 | 1 Ref |
| QNT170086 | Unassigned | Unassigned | Unassigned | 850_0 | Clustered | 91 VC_850_0 | 91 | 0.9934 | 1           | 0.9934 | 0 | 0 | 0 | 1 Ref |
| QNT170087 | Unassigned | Unassigned | Unassigned | 54_0  | Clustered | 87 VC_54_0  | 87 | 0.9858 | 1           | 0.9858 | 0 | 0 | 0 | 1 Ref |
| QNT170088 | Unassigned | Unassigned | Unassigned | 850_0 | Clustered | 91 VC_850_0 | 91 | 0.9934 | 1           | 0.9934 | 0 | 0 | 0 | 1 Ref |
| QNT170089 | Unassigned | Unassigned | Unassigned | 54_0  | Clustered | 87 VC_54_0  | 87 | 0.9858 | 1           | 0.9858 | 0 | 0 | 0 | 1 Ref |
| QNT170090 | Unassigned | Unassigned | Unassigned | 850_0 | Clustered | 91 VC_850_0 | 91 | 0.9934 | 1           | 0.9934 | 0 | 0 | 0 | 1 Ref |
| QNT170091 | Unassigned | Unassigned | Unassigned | 54_0  | Clustered | 87 VC_54_0  | 87 | 0.9858 | 1           | 0.9858 | 0 | 0 | 0 | 1 Ref |
| QNT170092 | Unassigned | Unassigned | Unassigned | 850_0 | Clustered | 91 VC_850_0 | 91 | 0.9934 | 1           | 0.9934 | 0 | 0 | 0 | 1 Ref |
| QNT170093 | Unassigned | Unassigned | Unassigned | 54_0  | Clustered | 87 VC_54_0  | 87 | 0.9858 | 1           | 0.9858 | 0 | 0 | 0 | 1 Ref |
| QNT170094 | Unassigned | Unassigned | Unassigned | 850_0 | Clustered | 91 VC_850_0 | 91 | 0.9934 | 1           | 0.9934 | 0 | 0 | 0 | 1 Ref |
| QNT170095 | Unassigned | Unassigned | Unassigned | 54_0  | Clustered | 87 VC_54_0  | 87 | 0.9858 | 1           | 0.9858 | 0 | 0 | 0 | 1 Ref |
| QNT170096 | Unassigned | Unassigned | Unassigned | 850_0 | Clustered | 91 VC_850_0 | 91 | 0.9934 | 1           | 0.9934 | 0 | 0 | 0 | 1 Ref |
| QNT170097 | Unassigned | Unassigned | Unassigned | 54_0  | Clustered | 87 VC_54_0  | 87 | 0.9858 | 1           | 0.9858 | 0 | 0 | 0 | 1 Ref |
| QNT170098 | Unassigned | Unassigned | Unassigned | 850_0 | Clustered | 91 VC_850_0 | 91 | 0.9934 | 1           | 0.9934 | 0 | 0 | 0 | 1 Ref |
| QNT170100 | Unassigned | Unassigned | Unassigned | 850_0 | Clustered | 91 VC_850_0 | 91 | 0.9934 | 1           | 0.9934 | 0 | 0 | 0 | 1 Ref |
| QNT170101 | Unassigned | Unassigned | Unassigned | 54_0  | Clustered | 87 VC_54_0  | 87 | 0.9858 | 1           | 0.9934 | 0 | 0 | 0 | 1 Ref |
| QNT170102 | Unassigned | Unassigned | Unassigned | 850_0 | Clustered | 91 VC_850_0 | 91 | 0.9934 | 1           | 0.9858 | 0 | 0 | 0 | 1 Ref |
| QNT170103 | Unassigned | Unassigned | Unassigned | 54_0  | Clustered | 87 VC_54_0  | 87 | 0.9858 | 1           | 0.9858 | 0 | 0 | 0 | 1 Ref |
| QNT170104 | Unassigned | Unassigned | Unassigned | 850_0 | Clustered | 91 VC_850_0 | 91 | 0.9934 | 1           | 0.9934 | 0 | 0 | 0 | 1 Ref |
| QNT170105 | Unassigned | Unassigned | Unassigned | 54_0  | Clustered | 87 VC_54_0  | 87 | 0.9858 | 1           | 0.9858 | 0 | 0 | 0 | 1 Ref |
| QNT170106 | Unassigned | Unassigned | Unassigned | 850_0 | Clustered | 91 VC_850_0 | 91 | 0.9934 | 1           | 0.9934 | 0 | 0 | 0 | 1 Ref |
| QNT170107 | Unassigned | Unassigned | Unassigned | 54_0  | Clustered | 87 VC_54_0  | 87 | 0.9858 | 1           | 0.9858 | 0 | 0 | 0 | 1 Ref |
| QNT170108 | Unassigned | Unassigned | Unassigned | 850_0 | Clustered | 91 VC_850_0 | 91 | 0.9934 | 1           | 0.9934 | 0 | 0 | 0 | 1 Ref |
| QNT170109 | Unassigned | Unassigned | Unassigned | 54_0  | Clustered | 87 VC_54_0  | 87 | 0.9858 | 1           | 0.9858 | 0 | 0 | 0 | 1 Ref |
| QNT170110 | Unassigned | Unassigned | Unassigned | 850_0 | Clustered | 91 VC_850_0 | 91 | 0.9934 | 1           | 0.9934 | 0 | 0 | 0 | 1 Ref |
| QNT170111 | Unassigned | Unassigned | Unassigned | 54_0  | Clustered | 87 VC_54_0  | 87 | 0.9858 | 1           | 0.9858 | 0 | 0 | 0 | 1 Ref |
| QNT170112 | Unassigned | Unassigned | Unassigned | 850_0 | Clustered | 91 VC_850_0 | 91 | 0.9934 | 1           | 0.9934 | 0 | 0 | 0 | 1 Ref |
| QNT170113 | Unassigned | Unassigned | Unassigned | 54_0  | Clustered | 87 VC_54_0  | 87 | 0.9858 | 1           | 0.9858 | 0 | 0 | 0 | 1 Ref |
| QNT170114 | Unassigned | Unassigned | Unassigned | 850_0 | Clustered | 91 VC_850_0 | 91 | 0.9934 | 1           | 0.9934 | 0 | 0 | 0 | 1 Ref |
| QNT170115 | Unassigned | Unassigned | Unassigned | 54_0  | Clustered | 87 VC_54_0  | 87 | 0.9858 | 1           | 0.9858 | 0 | 0 | 0 | 1 Ref |
| QNT170116 | Unassigned | Unassigned | Unassigned | 850_0 | Clustered | 91 VC_850_0 | 91 | 0.9934 | 1           | 0.9934 | 0 | 0 | 0 | 1 Ref |
| QNT170117 | Unassigned | Unassigned | Unassigned | 54_0  | Clustered | 87 VC_54_0  | 87 | 0.9858 | 1           | 0.9858 | 0 | 0 | 0 | 1 Ref |
| QNT170118 | Unassigned | Unassigned | Unassigned | 850_0 | Clustered | 91 VC_850_0 | 91 | 0.9934 | 1           | 0.9934 | 0 | 0 | 0 | 1 Ref |
| QNT170119 | Unassigned | Unassigned | Unassigned | 54_0  | Clustered | 87 VC_54_0  | 87 | 0.9858 | 1           | 0.9858 | 0 | 0 | 0 | 1 Ref |
| QNT170120 | Unassigned | Unassigned | Unassigned | 850_0 | Clustered | 91 VC_850_0 | 91 | 0.9934 | 1           | 0.9934 | 0 | 0 | 0 | 1 Ref |
| QNT170121 | Unassigned | Unassigned | Unassigned | 54_0  | Clustered | 87 VC_54_0  | 87 | 0.9858 | 1           | 0.9858 | 0 | 0 | 0 | 1 Ref |
| QNT170122 | Unassigned | Unassigned | Unassigned | 850_0 | Clustered | 91 VC_850_0 | 91 | 0.9934 | 1           | 0.9934 | 0 | 0 | 0 | 1 Ref |
| QNT170124 | Unassigned | Unassigned | Unassigned | 850_0 | Clustered | 91 VC_850_0 | 91 | 0.9934 | 1           | 0.9934 | 0 | 0 | 0 | 1 Ref |
| QNT170125 | Unassigned | Unassigned | Unassigned | 54_0  | Clustered | 87 VC_54_0  | 87 | 0.9858 | 1           | 0.9858 | 0 | 0 | 0 | 1 Ref |
| QNT170126 | Unassigned | Unassigned | Unassigned | 850_0 | Clustered | 91 VC_850_0 | 91 | 0.9934 | 1           | 0.9934 | 0 | 0 | 0 | 1 Ref |
| QNT170127 | Unassigned | Unassigned | Unassigned | 54_0  | Clustered | 87 VC_54_0  | 87 | 0.9858 | 1           | 0.9858 | 0 | 0 | 0 | 1 Ref |
| QNT170128 | Unassigned | Unassigned | Unassigned | 1_0   | Clustered | 54 VC_1_0   | 54 | 0.8518 | 1           | 0.8518 | 0 | 0 | 0 | 1 Ref |
| QNT170129 | Unassigned | Unassigned | Unassigned | 370_0 | Clustered | 53 VC_370_0 | 53 | 0.8972 | 1           | 0.8972 | 0 | 0 | 0 | 1 Ref |
| QNT170130 | Unassigned | Unassigned | Unassigned | 1_0   | Clustered | 54 VC_1_0   | 54 | 0.8518 | 1           | 0.8518 | 0 | 0 | 0 | 1 Ref |
| QNT170131 | Unassigned | Unassigned | Unassigned | 1_0   | Clustered | 54 VC_1_0   | 54 | 0.8518 | 1           | 0.8518 | 0 | 0 | 0 | 1 Ref |
| QNT170132 | Unassigned | Unassigned | Unassigned | 54_0  | Clustered | 87 VC_54_0  | 87 | 0.9858 | 1           | 0.9858 | 0 | 0 | 0 | 1 Ref |
| QNT170133 | Unassigned | Unassigned | Unassigned | 370_0 | Clustered | 53 VC_370_0 | 53 | 0.8972 | 1           | 0.8972 | 0 | 0 | 0 | 1 Ref |
| QNT170134 | Unassigned | Unassigned | Unassigned | 370_0 | Clustered | 53 VC_370_0 | 53 | 0.8972 | 1           | 0.8972 | 0 | 0 | 0 | 1 Ref |
| QNT170135 | Unassigned | Unassigned | Unassigned | 1_0   | Clustered | 54 VC_1_0   | 54 | 0.8518 | 1           | 0.8518 | 0 | 0 | 0 | 1 Ref |
| QNT170136 | Unassigned | Unassigned | Unassigned | 370_0 | Clustered | 53 VC_370_0 | 53 | 0.8972 | 1           | 0.8972 | 0 | 0 | 0 | 1 Ref |
| QNT170139 | Unassigned | Unassigned | Unassigned | 55_0  | Clustered | 5 VC_55_0   | 5  | 0.4963 | 0.99999808  | 0.4963 | 0 | 0 | 0 | 1 Ref |
| QNT170142 | Unassigned | Unassigned | Unassigned | 850_0 | Clustered | 91 VC_850_0 | 91 | 0.9934 | 1           | 0.9934 | 0 | 0 | 0 | 1 Ref |
| QNT170143 | Unassigned | Unassigned | Unassigned | 54_0  | Clustered | 87 VC_54_0  | 87 | 0.9858 | 1           | 0.9858 | 0 | 0 | 0 | 1 Ref |
| QNT170144 | Unassigned | Unassigned | Unassigned | 850_0 | Clustered | 91 VC_850_0 | 91 | 0.9934 | 1           | 0.9934 | 0 | 0 | 0 | 1 Ref |
| QNT170145 | Unassigned | Unassigned | Unassigned | 54_0  | Clustered | 87 VC_54_0  | 87 | 0.9858 | 1           | 0.9858 | 0 | 0 | 0 | 1 Ref |
| QNT170146 | Unassigned | Unassigned | Unassigned | 850_0 | Clustered | 91 VC_850_0 | 91 | 0.9934 | 1           | 0.9934 | 0 | 0 | 0 | 1 Ref |
| QNT170147 | Unassigned | Unassigned | Unassigned | 54_0  | Clustered | 87 VC_54_0  | 87 | 0.9858 | 1           | 0.9858 | 0 | 0 | 0 | 1 Ref |
| QNT170148 | Unassigned | Unassigned | Unassigned | 186_0 | Clustered | 4 VC_186_0  | 4  | 0.2052 | 0.99998618  | 0.2052 | 0 | 0 | 0 | 1 Ref |
| QNT170149 | Unassigned | Unassigned | Unassigned | 371_0 | Clustered | 3 VC_371_0  | 3  | 0.5145 | 0.97657291  | 0.5025 | 0 | 0 | 0 | 1 Ref |
| QNT170150 | Unassigned | Unassigned | Unassigned | 370_0 | Clustered | 53 VC_370_0 | 53 | 0.8972 | 1           | 0.8972 | 0 | 0 | 0 | 1 Ref |



|          |            |            |            |       |           |             |    |        |            |        |   |   |   |            |
|----------|------------|------------|------------|-------|-----------|-------------|----|--------|------------|--------|---|---|---|------------|
| ONI70151 | Unassigned | Unassigned | Unassigned | 1,0   | Clustered | 54 VC_1,0   | 54 | 0.8518 | 1          | 0.8518 | 0 | 0 | 0 | 1 Ref      |
| ONI70152 | Unassigned | Unassigned | Unassigned | 850,0 | Clustered | 91 VC_850,0 | 91 | 0.9934 | 1          | 0.9934 | 0 | 0 | 0 | 1 Ref      |
| ONI70153 | Unassigned | Unassigned | Unassigned | 54,0  | Clustered | 87 VC_54,0  | 87 | 0.9858 | 1          | 0.9858 | 0 | 0 | 0 | 1 Ref      |
| ONI70154 | Unassigned | Unassigned | Unassigned | 850,0 | Clustered | 91 VC_850,0 | 91 | 0.9934 | 1          | 0.9934 | 0 | 0 | 0 | 1 Ref      |
| ONI70155 | Unassigned | Unassigned | Unassigned | 54,0  | Clustered | 87 VC_54,0  | 87 | 0.9858 | 1          | 0.9858 | 0 | 0 | 0 | 1 Ref      |
| ONI70156 | Unassigned | Unassigned | Unassigned | 850,0 | Clustered | 91 VC_850,0 | 91 | 0.9934 | 1          | 0.9934 | 0 | 0 | 0 | 1 Ref      |
| ONI70157 | Unassigned | Unassigned | Unassigned | 54,0  | Clustered | 87 VC_54,0  | 87 | 0.9858 | 1          | 0.9858 | 0 | 0 | 0 | 1 Ref      |
| ONI70158 | Unassigned | Unassigned | Unassigned | 850,0 | Clustered | 91 VC_850,0 | 91 | 0.9934 | 1          | 0.9934 | 0 | 0 | 0 | 1 Ref      |
| ONI70159 | Unassigned | Unassigned | Unassigned | 54,0  | Clustered | 87 VC_54,0  | 87 | 0.9858 | 1          | 0.9858 | 0 | 0 | 0 | 1 Ref      |
| ONI70160 | Unassigned | Unassigned | Unassigned | 850,0 | Clustered | 91 VC_850,0 | 91 | 0.9934 | 1          | 0.9934 | 0 | 0 | 0 | 1 Ref      |
| ONI70161 | Unassigned | Unassigned | Unassigned | 54,0  | Clustered | 87 VC_54,0  | 87 | 0.9858 | 1          | 0.9858 | 0 | 0 | 0 | 1 Ref      |
| ONI70162 | Unassigned | Unassigned | Unassigned | 850,0 | Clustered | 91 VC_850,0 | 91 | 0.9934 | 1          | 0.9934 | 0 | 0 | 0 | 1 Ref      |
| ONI70163 | Unassigned | Unassigned | Unassigned | 54,0  | Clustered | 87 VC_54,0  | 87 | 0.9858 | 1          | 0.9858 | 0 | 0 | 0 | 1 Ref      |
| ONI70164 | Unassigned | Unassigned | Unassigned | 850,0 | Clustered | 91 VC_850,0 | 91 | 0.9934 | 1          | 0.9934 | 0 | 0 | 0 | 1 Ref      |
| ONI70165 | Unassigned | Unassigned | Unassigned | 54,0  | Clustered | 87 VC_54,0  | 87 | 0.9858 | 1          | 0.9858 | 0 | 0 | 0 | 1 Ref      |
| ONI70166 | Unassigned | Unassigned | Unassigned | 26,0  | Clustered | 12 VC_26,0  | 12 | 0.7926 | 1          | 0.7926 | 0 | 0 | 0 | 1 Ref      |
| ONI70167 | Unassigned | Unassigned | Unassigned | 850,0 | Clustered | 91 VC_850,0 | 91 | 0.9934 | 1          | 0.9934 | 0 | 0 | 0 | 1 Ref      |
| ONI70168 | Unassigned | Unassigned | Unassigned | 54,0  | Clustered | 87 VC_54,0  | 87 | 0.9858 | 1          | 0.9858 | 0 | 0 | 0 | 1 Ref      |
| ONI70169 | Unassigned | Unassigned | Unassigned | 26,0  | Clustered | 12 VC_26,0  | 12 | 0.7926 | 1          | 0.7926 | 0 | 0 | 0 | 1 Ref      |
| ONI70170 | Unassigned | Unassigned | Unassigned | 186,0 | Clustered | 4 VC_186,0  | 4  | 0.2052 | 0.99998618 | 0.2052 | 0 | 0 | 0 | 1 Ref      |
| ONI70171 | Unassigned | Unassigned | Unassigned | 371,0 | Clustered | 3 VC_371,0  | 3  | 0.5145 | 0.97657291 | 0.5025 | 0 | 0 | 0 | 1 Ref      |
| ONI70172 | Unassigned | Unassigned | Unassigned | 370,0 | Clustered | 53 VC_370,0 | 53 | 0.8972 | 1          | 0.8972 | 0 | 0 | 0 | 1 Ref      |
| ONI70173 | Unassigned | Unassigned | Unassigned | 1,0   | Clustered | 54 VC_1,0   | 54 | 0.8518 | 1          | 0.8518 | 0 | 0 | 0 | 1 Ref      |
| ONI70174 | Unassigned | Unassigned | Unassigned | 71,0  | Clustered | 27 VC_71,0  | 27 | 0.5964 | 1          | 0.5964 | 0 | 0 | 0 | 0.9943 Ref |
| ONI70175 | Unassigned | Unassigned | Unassigned | 370,0 | Clustered | 53 VC_370,0 | 53 | 0.8972 | 1          | 0.8972 | 0 | 0 | 0 | 1 Ref      |
| ONI70176 | Unassigned | Unassigned | Unassigned | 850,0 | Clustered | 91 VC_850,0 | 91 | 0.9934 | 1          | 0.9934 | 0 | 0 | 0 | 1 Ref      |
| ONI70178 | Unassigned | Unassigned | Unassigned | 71,0  | Clustered | 27 VC_71,0  | 27 | 0.5964 | 1          | 0.5964 | 0 | 0 | 0 | 0.9943 Ref |
| ONI70179 | Unassigned | Unassigned | Unassigned | 370,0 | Clustered | 53 VC_370,0 | 53 | 0.8972 | 1          | 0.8972 | 0 | 0 | 0 | 1 Ref      |
| ONI70180 | Unassigned | Unassigned | Unassigned | 850,0 | Clustered | 91 VC_850,0 | 91 | 0.9934 | 1          | 0.9934 | 0 | 0 | 0 | 1 Ref      |
| ONI70181 | Unassigned | Unassigned | Unassigned | 370,0 | Clustered | 53 VC_370,0 | 53 | 0.8972 | 1          | 0.8972 | 0 | 0 | 0 | 1 Ref      |
| ONI70182 | Unassigned | Unassigned | Unassigned | 370,0 | Clustered | 53 VC_370,0 | 53 | 0.8972 | 1          | 0.8972 | 0 | 0 | 0 | 1 Ref      |
| ONI70184 | Unassigned | Unassigned | Unassigned | 71,0  | Clustered | 27 VC_71,0  | 27 | 0.5964 | 1          | 0.5964 | 0 | 0 | 0 | 0.9943 Ref |
| ONI70185 | Unassigned | Unassigned | Unassigned | 370,0 | Clustered | 53 VC_370,0 | 53 | 0.8972 | 1          | 0.8972 | 0 | 0 | 0 | 1 Ref      |
| ONI70186 | Unassigned | Unassigned | Unassigned | 850,0 | Clustered | 91 VC_850,0 | 91 | 0.9934 | 1          | 0.9934 | 0 | 0 | 0 | 1 Ref      |
| ONI70187 | Unassigned | Unassigned | Unassigned | 370,0 | Clustered | 53 VC_370,0 | 53 | 0.8972 | 1          | 0.8972 | 0 | 0 | 0 | 1 Ref      |
| ONI70188 | Unassigned | Unassigned | Unassigned | 257,0 | Clustered | 3 VC_257,0  | 3  | 0.2099 | 0.99831999 | 0.2095 | 0 | 0 | 0 | 1 Ref      |
| ONI70189 | Unassigned | Unassigned | Unassigned | 850,0 | Clustered | 91 VC_850,0 | 91 | 0.9934 | 1          | 0.9934 | 0 | 0 | 0 | 1 Ref      |
| ONI70190 | Unassigned | Unassigned | Unassigned | 71,0  | Clustered | 27 VC_71,0  | 27 | 0.5964 | 1          | 0.5964 | 0 | 0 | 0 | 0.9943 Ref |
| ONI70192 | Unassigned | Unassigned | Unassigned | 850,0 | Clustered | 91 VC_850,0 | 91 | 0.9934 | 1          | 0.9934 | 0 | 0 | 0 | 1 Ref      |
| ONI70193 | Unassigned | Unassigned | Unassigned | 54,0  | Clustered | 87 VC_54,0  | 87 | 0.9858 | 1          | 0.9858 | 0 | 0 | 0 | 1 Ref      |
| ONI70194 | Unassigned | Unassigned | Unassigned | 850,0 | Clustered | 91 VC_850,0 | 91 | 0.9934 | 1          | 0.9934 | 0 | 0 | 0 | 1 Ref      |
| ONI70195 | Unassigned | Unassigned | Unassigned | 54,0  | Clustered | 87 VC_54,0  | 87 | 0.9858 | 1          | 0.9858 | 0 | 0 | 0 | 1 Ref      |
| ONI70196 | Unassigned | Unassigned | Unassigned | 850,0 | Clustered | 91 VC_850,0 | 91 | 0.9934 | 1          | 0.9934 | 0 | 0 | 0 | 1 Ref      |
| ONI70197 | Unassigned | Unassigned | Unassigned | 54,0  | Clustered | 87 VC_54,0  | 87 | 0.9858 | 1          | 0.9858 | 0 | 0 | 0 | 1 Ref      |
| ONI70198 | Unassigned | Unassigned | Unassigned | 850,0 | Clustered | 91 VC_850,0 | 91 | 0.9934 | 1          | 0.9934 | 0 | 0 | 0 | 1 Ref      |
| ONI70199 | Unassigned | Unassigned | Unassigned | 54,0  | Clustered | 87 VC_54,0  | 87 | 0.9858 | 1          | 0.9858 | 0 | 0 | 0 | 1 Ref      |
| ONI70200 | Unassigned | Unassigned | Unassigned | 850,0 | Clustered | 91 VC_850,0 | 91 | 0.9934 | 1          | 0.9934 | 0 | 0 | 0 | 1 Ref      |
| ONI70201 | Unassigned | Unassigned | Unassigned | 54,0  | Clustered | 87 VC_54,0  | 87 | 0.9858 | 1          | 0.9858 | 0 | 0 | 0 | 1 Ref      |
| ONI70202 | Unassigned | Unassigned | Unassigned | 850,0 | Clustered | 91 VC_850,0 | 91 | 0.9934 | 1          | 0.9934 | 0 | 0 | 0 | 1 Ref      |
| ONI70203 | Unassigned | Unassigned | Unassigned | 54,0  | Clustered | 87 VC_54,0  | 87 | 0.9858 | 1          | 0.9858 | 0 | 0 | 0 | 1 Ref      |
| ONI70204 | Unassigned | Unassigned | Unassigned | 850,0 | Clustered | 91 VC_850,0 | 91 | 0.9934 | 1          | 0.9934 | 0 | 0 | 0 | 1 Ref      |
| ONI70205 | Unassigned | Unassigned | Unassigned | 54,0  | Clustered | 87 VC_54,0  | 87 | 0.9858 | 1          | 0.9858 | 0 | 0 | 0 | 1 Ref      |
| ONI70206 | Unassigned | Unassigned | Unassigned | 850,0 | Clustered | 91 VC_850,0 | 91 | 0.9934 | 1          | 0.9934 | 0 | 0 | 0 | 1 Ref      |
| ONI70207 | Unassigned | Unassigned | Unassigned | 54,0  | Clustered | 87 VC_54,0  | 87 | 0.9858 | 1          | 0.9858 | 0 | 0 | 0 | 1 Ref      |
| ONI70208 | Unassigned | Unassigned | Unassigned | 370,0 | Clustered | 53 VC_370,0 | 53 | 0.8972 | 1          | 0.8972 | 0 | 0 | 0 | 1 Ref      |
| ONI70209 | Unassigned | Unassigned | Unassigned | 368,0 | Clustered | 5 VC_368,0  | 5  | 0.5911 | 0.99999979 | 0.5911 | 0 | 0 | 0 | 1 Ref      |
| ONI70210 | Unassigned | Unassigned | Unassigned | 1,0   | Clustered | 54 VC_1,0   | 54 | 0.8518 | 1          | 0.8518 | 0 | 0 | 0 | 1 Ref      |
| ONI70211 | Unassigned | Unassigned | Unassigned | 850,0 | Clustered | 91 VC_850,0 | 91 | 0.9934 | 1          | 0.9934 | 0 | 0 | 0 | 1 Ref      |
| ONI70212 | Unassigned | Unassigned | Unassigned | 54,0  | Clustered | 87 VC_54,0  | 87 | 0.9858 | 1          | 0.9858 | 0 | 0 | 0 | 1 Ref      |
| ONI70213 | Unassigned | Unassigned | Unassigned | 1,0   | Clustered | 54 VC_1,0   | 54 | 0.8518 | 1          | 0.8518 | 0 | 0 | 0 | 1 Ref      |
| ONI70214 | Unassigned | Unassigned | Unassigned | 370,0 | Clustered | 53 VC_370,0 | 53 | 0.8972 | 1          | 0.8972 | 0 | 0 | 0 | 1 Ref      |
| ONI70215 | Unassigned | Unassigned | Unassigned | 850,0 | Clustered | 91 VC_850,0 | 91 | 0.9934 | 1          | 0.9934 | 0 | 0 | 0 | 1 Ref      |
| ONI70216 | Unassigned | Unassigned | Unassigned | 54,0  | Clustered | 87 VC_54,0  | 87 | 0.9858 | 1          | 0.9858 | 0 | 0 | 0 | 1 Ref      |
| ONI70217 | Unassigned | Unassigned | Unassigned | 850,0 | Clustered | 91 VC_850,0 | 91 | 0.9934 | 1          | 0.9934 | 0 | 0 | 0 | 1 Ref      |
| ONI70218 | Unassigned | Unassigned | Unassigned | 54,0  | Clustered | 87 VC_54,0  | 87 | 0.9858 | 1          | 0.9858 | 0 | 0 | 0 | 1 Ref      |
| ONI70219 | Unassigned | Unassigned | Unassigned | 850,0 | Clustered | 91 VC_850,0 | 91 | 0.9934 | 1          | 0.9934 | 0 | 0 | 0 | 1 Ref      |
| ONI70220 | Unassigned | Unassigned | Unassigned | 54,0  | Clustered | 87 VC_54,0  | 87 | 0.9858 | 1          | 0.9858 | 0 | 0 | 0 | 1 Ref      |
| ONI70221 | Unassigned | Unassigned | Unassigned | 850,0 | Clustered | 91 VC_850,0 | 91 | 0.9934 | 1          | 0.9934 | 0 | 0 | 0 | 1 Ref      |
| ONI70222 | Unassigned | Unassigned | Unassigned | 850,0 | Clustered | 91 VC_850,0 | 91 | 0.9934 | 1          | 0.9934 | 0 | 0 | 0 | 1 Ref      |
| ONI70223 | Unassigned | Unassigned | Unassigned | 54,0  | Clustered | 87 VC_54,0  | 87 | 0.9858 | 1          | 0.9858 | 0 | 0 | 0 | 1 Ref      |
| ONI70225 | Unassigned | Unassigned | Unassigned | 850,0 | Clustered | 91 VC_850,0 | 91 | 0.9934 | 1          | 0.9934 | 0 | 0 | 0 | 1 Ref      |
| ONI70226 | Unassigned | Unassigned | Unassigned | 54,0  | Clustered | 87 VC_54,0  | 87 | 0.9858 | 1          | 0.9858 | 0 | 0 | 0 | 1 Ref      |
| ONI70227 | Unassigned | Unassigned | Unassigned | 1,0   | Clustered | 54 VC_1,0   | 54 | 0.8518 | 1          | 0.8518 | 0 | 0 | 0 | 1 Ref      |
| ONI70228 | Unassigned | Unassigned | Unassigned | 370,0 | Clustered | 53 VC_370,0 | 53 | 0.8972 | 1          | 0.8972 | 0 | 0 | 0 | 1 Ref      |
| ONI70229 | Unassigned | Unassigned | Unassigned | 370,0 | Clustered | 53 VC_370,0 | 53 | 0.8972 | 1          | 0.8972 | 0 | 0 | 0 | 1 Ref      |
| ONI70230 | Unassigned | Unassigned | Unassigned | 1,0   | Clustered | 54 VC_1,0   | 54 | 0.8518 | 1          | 0.8518 | 0 | 0 | 0 | 1 Ref      |
| ONI70231 | Unassigned | Unassigned | Unassigned | 368,0 | Clustered | 5 VC_368,0  | 5  | 0.5911 | 0.99999979 | 0.5911 | 0 | 0 | 0 | 1 Ref      |
| ONI70232 | Unassigned | Unassigned | Unassigned | 370,0 | Clustered | 53 VC_370,0 | 53 | 0.8972 | 1          | 0.8972 | 0 | 0 | 0 | 1 Ref      |
| ONI70233 | Unassigned | Unassigned | Unassigned | 1,0   | Clustered | 54 VC_1,0   | 54 | 0.8518 | 1          | 0.8518 | 0 | 0 | 0 | 1 Ref      |
| ONI70234 | Unassigned | Unassigned | Unassigned | 370,0 | Clustered | 53 VC_370,0 | 53 | 0.8972 | 1          | 0.8972 | 0 | 0 | 0 | 1 Ref      |
| ONI70235 | Unassigned | Unassigned | Unassigned | 1,0   | Clustered | 54 VC_1,0   | 54 | 0.8518 | 1          | 0.8518 | 0 | 0 | 0 | 1 Ref      |



[illegible]



|          |            |            |            |         |                     |              |    |        |            |        |   |   |   |            |
|----------|------------|------------|------------|---------|---------------------|--------------|----|--------|------------|--------|---|---|---|------------|
| ON170326 | Unassigned | Unassigned | Unassigned | 370_0   | Clustered           | 53 VC_370_0  | 53 | 0.8972 | 1          | 0.8972 | 0 | 0 | 0 | 1 Ref      |
| ON170327 | Unassigned | Unassigned | Unassigned | 370_0   | Clustered           | 53 VC_370_0  | 53 | 0.8972 | 1          | 0.8972 | 0 | 0 | 0 | 1 Ref      |
| ON170328 | Unassigned | Unassigned | Unassigned | 368_0   | Clustered           | 5 VC_368_0   | 5  | 0.5911 | 0.99999979 | 0.5911 | 0 | 0 | 0 | 1 Ref      |
| ON170329 | Unassigned | Unassigned | Unassigned | 1_0     | Clustered           | 54 VC_1_0    | 54 | 0.8518 | 1          | 0.8518 | 0 | 0 | 0 | 1 Ref      |
| ON170330 | Unassigned | Unassigned | Unassigned | 850_0   | Clustered           | 91 VC_850_0  | 91 | 0.9934 | 1          | 0.9934 | 0 | 0 | 0 | 1 Ref      |
| ON170331 | Unassigned | Unassigned | Unassigned | 54_0    | Clustered           | 87 VC_54_0   | 87 | 0.9858 | 1          | 0.9858 | 0 | 0 | 0 | 1 Ref      |
| ON170332 | Unassigned | Unassigned | Unassigned | 850_0   | Clustered           | 91 VC_850_0  | 91 | 0.9934 | 1          | 0.9934 | 0 | 0 | 0 | 1 Ref      |
| ON170333 | Unassigned | Unassigned | Unassigned | 54_0    | Clustered           | 87 VC_54_0   | 87 | 0.9858 | 1          | 0.9858 | 0 | 0 | 0 | 1 Ref      |
| ON170334 | Unassigned | Unassigned | Unassigned | 850_0   | Clustered           | 91 VC_850_0  | 91 | 0.9934 | 1          | 0.9934 | 0 | 0 | 0 | 1 Ref      |
| ON170335 | Unassigned | Unassigned | Unassigned | 54_0    | Clustered           | 87 VC_54_0   | 87 | 0.9858 | 1          | 0.9858 | 0 | 0 | 0 | 1 Ref      |
| ON170336 | Unassigned | Unassigned | Unassigned | 850_0   | Clustered           | 91 VC_850_0  | 91 | 0.9934 | 1          | 0.9934 | 0 | 0 | 0 | 1 Ref      |
| ON170337 | Unassigned | Unassigned | Unassigned | 54_0    | Clustered           | 87 VC_54_0   | 87 | 0.9858 | 1          | 0.9858 | 0 | 0 | 0 | 1 Ref      |
| ON170338 | Unassigned | Unassigned | Unassigned | 850_0   | Clustered           | 91 VC_850_0  | 91 | 0.9934 | 1          | 0.9934 | 0 | 0 | 0 | 1 Ref      |
| ON170339 | Unassigned | Unassigned | Unassigned | 54_0    | Clustered           | 87 VC_54_0   | 87 | 0.9858 | 1          | 0.9858 | 0 | 0 | 0 | 1 Ref      |
| ON170340 | Unassigned | Unassigned | Unassigned | 850_0   | Clustered           | 91 VC_850_0  | 91 | 0.9934 | 1          | 0.9934 | 0 | 0 | 0 | 1 Ref      |
| ON170341 | Unassigned | Unassigned | Unassigned | 54_0    | Clustered           | 87 VC_54_0   | 87 | 0.9858 | 1          | 0.9858 | 0 | 0 | 0 | 1 Ref      |
| ON170343 | Unassigned | Unassigned | Unassigned | 370_0   | Clustered           | 53 VC_370_0  | 53 | 0.8972 | 1          | 0.8972 | 0 | 0 | 0 | 1 Ref      |
| ON170344 | Unassigned | Unassigned | Unassigned | 1_0     | Clustered           | 54 VC_1_0    | 54 | 0.8518 | 1          | 0.8518 | 0 | 0 | 0 | 1 Ref      |
| ON170347 | Unassigned | Unassigned | Unassigned | 1_0     | Clustered           | 54 VC_1_0    | 54 | 0.8518 | 1          | 0.8518 | 0 | 0 | 0 | 1 Ref      |
| ON170348 | Unassigned | Unassigned | Unassigned | 1_0     | Clustered           | 54 VC_1_0    | 54 | 0.8518 | 1          | 0.8518 | 0 | 0 | 0 | 1 Ref      |
| ON170351 | Unassigned | Unassigned | Unassigned | 1_0     | Clustered           | 54 VC_1_0    | 54 | 0.8518 | 1          | 0.8518 | 0 | 0 | 0 | 1 Ref      |
| ON170352 | Unassigned | Unassigned | Unassigned | 850_0   | Clustered           | 91 VC_850_0  | 91 | 0.9934 | 1          | 0.9934 | 0 | 0 | 0 | 1 Ref      |
| ON170353 | Unassigned | Unassigned | Unassigned | 54_0    | Clustered           | 87 VC_54_0   | 87 | 0.9858 | 1          | 0.9858 | 0 | 0 | 0 | 1 Ref      |
| ON170354 | Unassigned | Unassigned | Unassigned | 186_0   | Clustered           | 4 VC_186_0   | 4  | 0.2052 | 0.99998618 | 0.2052 | 0 | 0 | 0 | 1 Ref      |
| ON170355 | Unassigned | Unassigned | Unassigned | 370_0   | Clustered           | 53 VC_370_0  | 53 | 0.8972 | 1          | 0.8972 | 0 | 0 | 0 | 1 Ref      |
| ON170356 | Unassigned | Unassigned | Unassigned | 850_0   | Clustered           | 91 VC_850_0  | 91 | 0.9934 | 1          | 0.9934 | 0 | 0 | 0 | 1 Ref      |
| ON170357 | Unassigned | Unassigned | Unassigned | 26_0    | Clustered           | 12 VC_26_0   | 12 | 0.7926 | 1          | 0.7926 | 0 | 0 | 0 | 1 Ref      |
| ON170358 | Unassigned | Unassigned | Unassigned | 71_0    | Clustered           | 27 VC_71_0   | 27 | 0.5964 | 1          | 0.5964 | 0 | 0 | 0 | 0.9943 Ref |
| ON170359 | Unassigned | Unassigned | Unassigned | 370_0   | Clustered           | 53 VC_370_0  | 53 | 0.8972 | 1          | 0.8972 | 0 | 0 | 0 | 1 Ref      |
| ON170360 | Unassigned | Unassigned | Unassigned | 850_0   | Clustered           | 91 VC_850_0  | 91 | 0.9934 | 1          | 0.9934 | 0 | 0 | 0 | 1 Ref      |
| ON184124 | Unassigned | Unassigned | Unassigned | 859_0   | Clustered           | 67 VC_859_0  | 67 | 0.9622 | 1          | 0.9622 | 0 | 0 | 0 | 1 Ref      |
| ON184125 | Unassigned | Unassigned | Unassigned | 133_1   | Clustered           | 6 VC_133_1   | 6  | 0.0566 | 0.99999999 | 0.0566 | 0 | 0 | 0 | 1 Ref      |
| ON184126 | Unassigned | Unassigned | Unassigned | 133_1   | Clustered           | 6 VC_133_1   | 6  | 0.0566 | 0.99999999 | 0.0566 | 0 | 0 | 0 | 1 Ref      |
| ON185577 | Unassigned | Unassigned | Unassigned | 595_0   | Clustered           | 35 VC_595_0  | 35 | 0.8809 | 1          | 0.8809 | 0 | 0 | 0 | 1 Ref      |
| ON185580 | Unassigned | Unassigned | Unassigned | 466_0   | Clustered           | 66 VC_466_0  | 66 | 0.9246 | 1          | 0.9246 | 0 | 0 | 0 | 1 Ref      |
| ON185581 | Unassigned | Unassigned | Unassigned | 198_28  | Clustered           | 5 VC_198_28  | 5  | 0.03   | 0.99999993 | 0.03   | 0 | 0 | 0 | 1 Ref      |
| ON185582 | Unassigned | Unassigned | Unassigned | 198_28  | Clustered           | 5 VC_198_28  | 5  | 0.03   | 0.99999993 | 0.03   | 0 | 0 | 0 | 1 Ref      |
| ON185583 | Unassigned | Unassigned | Unassigned | 198_28  | Clustered           | 5 VC_198_28  | 5  | 0.03   | 0.99999993 | 0.03   | 0 | 0 | 0 | 1 Ref      |
| ON185584 | Unassigned | Unassigned | Unassigned | 198_28  | Clustered           | 5 VC_198_28  | 5  | 0.03   | 0.99999993 | 0.03   | 0 | 0 | 0 | 1 Ref      |
| ON185585 | Unassigned | Unassigned | Unassigned | 198_24  | Clustered           | 5 VC_198_24  | 5  | 0.029  | 0.99999995 | 0.029  | 0 | 0 | 0 | 0.7 Ref    |
| ON185586 | Unassigned | Unassigned | Unassigned | 976_0   | Clustered           | 36 VC_976_0  | 36 | 0.7833 | 1          | 0.7833 | 0 | 0 | 0 | 1 Ref      |
| ON185587 | Unassigned | Unassigned | Unassigned | 976_0   | Clustered           | 36 VC_976_0  | 36 | 0.7833 | 1          | 0.7833 | 0 | 0 | 0 | 1 Ref      |
| ON185588 | Unassigned | Unassigned | Unassigned | 976_0   | Clustered           | 36 VC_976_0  | 36 | 0.7833 | 1          | 0.7833 | 0 | 0 | 0 | 1 Ref      |
| ON185589 | Unassigned | Unassigned | Unassigned | 975_0   | Clustered           | 40 VC_975_0  | 40 | 0.6888 | 1          | 0.6888 | 0 | 0 | 0 | 1 Ref      |
| ON189042 | Unassigned | Unassigned | Unassigned | 766_0   | Clustered           | 40 VC_766_0  | 40 | 0.7511 | 1          | 0.7511 | 0 | 0 | 0 | 1 Ref      |
| ON189043 | Unassigned | Unassigned | Unassigned | 766_0   | Clustered           | 40 VC_766_0  | 40 | 0.7511 | 1          | 0.7511 | 0 | 0 | 0 | 1 Ref      |
| ON189044 | Unassigned | Unassigned | Unassigned | 766_0   | Clustered           | 40 VC_766_0  | 40 | 0.7511 | 1          | 0.7511 | 0 | 0 | 0 | 1 Ref      |
| ON189045 | Unassigned | Unassigned | Unassigned | 175_0   | Clustered           | 20 VC_175_0  | 20 | 0.7504 | 1          | 0.7504 | 0 | 0 | 0 | 1 Ref      |
| ON189046 | Unassigned | Unassigned | Unassigned | 131_0   | Clustered           | 43 VC_131_0  | 43 | 0.8853 | 1          | 0.8853 | 0 | 0 | 0 | 1 Ref      |
| ON189047 | Unassigned | Unassigned | Unassigned | 175_0   | Clustered           | 20 VC_175_0  | 20 | 0.7504 | 1          | 0.7504 | 0 | 0 | 0 | 1 Ref      |
| ON189048 | Unassigned | Unassigned | Unassigned | 178_0   | Clustered           | 5 VC_178_0   | 5  | 0.3547 | 0.99999997 | 0.3547 | 0 | 0 | 0 | 1 Ref      |
| ON190024 | Unassigned | Unassigned | Unassigned | 549_1   | Clustered           | 6 VC_549_1   | 6  | 0.1479 | 0.9998319  | 0.1478 | 0 | 0 | 0 | 1 Ref      |
| ON190025 | Unassigned | Unassigned | Unassigned | 549_0   | Clustered           | 9 VC_549_0   | 9  | 0.2597 | 1          | 0.2597 | 0 | 0 | 0 | 1 Ref      |
| ON202820 | Unassigned | Unassigned | Unassigned | 134_2   | Clustered           | 17 VC_134_2  | 17 | 0.1715 | 1          | 0.1715 | 0 | 0 | 0 | 0.9853 Ref |
| ON208829 | Unassigned | Unassigned | Unassigned | 335_32  | Clustered/Singleton | 1 VC_335_32  | 1  | 0      | 1          | 0      | 0 | 0 | 0 | 1 Ref      |
| ON208830 | Unassigned | Unassigned | Unassigned | 1115_3  | Clustered           | 6 VC_1115_3  | 6  | 0.1298 | 0.99999994 | 0.1298 | 0 | 0 | 0 | 0.8667 Ref |
| ON208832 | Unassigned | Unassigned | Unassigned | 1016_0  | Clustered           | 62 VC_1016_0 | 62 | 0.8638 | 1          | 0.8638 | 0 | 0 | 0 | 0.743 Ref  |
| ON208833 | Unassigned | Unassigned | Unassigned | 1250_0  | Clustered           | 29 VC_1250_0 | 29 | 0.822  | 1          | 0.822  | 0 | 0 | 0 | 1 Ref      |
| ON210136 | Unassigned | Unassigned | Unassigned | 859_0   | Clustered           | 67 VC_859_0  | 67 | 0.9622 | 1          | 0.9622 | 0 | 0 | 0 | 1 Ref      |
| ON210137 | Unassigned | Unassigned | Unassigned | 636_0   | Clustered           | 13 VC_636_0  | 13 | 0.6223 | 1          | 0.6223 | 0 | 0 | 0 | 1 Ref      |
| ON210138 | Unassigned | Unassigned | Unassigned | 340_20  | Clustered           | 4 VC_340_20  | 4  | 0.0173 | 0.99998777 | 0.0173 | 0 | 0 | 0 | 1 Ref      |
| ON210139 | Unassigned | Unassigned | Unassigned | 290_98  | Clustered/Singleton | 1 VC_290_98  | 1  | 0      | 1          | 0      | 0 | 0 | 0 | 1 Ref      |
| ON210142 | Unassigned | Unassigned | Unassigned | 714_0   | Clustered           | 71 VC_714_0  | 71 | 0.935  | 1          | 0.935  | 0 | 0 | 0 | 1 Ref      |
| ON210144 | Unassigned | Unassigned | Unassigned | 466_0   | Clustered           | 66 VC_466_0  | 66 | 0.9246 | 1          | 0.9246 | 0 | 0 | 0 | 1 Ref      |
| ON210145 | Unassigned | Unassigned | Unassigned | 466_0   | Clustered           | 66 VC_466_0  | 66 | 0.9246 | 1          | 0.9246 | 0 | 0 | 0 | 1 Ref      |
| ON210834 | Unassigned | Unassigned | Unassigned | 108_0   | Clustered           | 2 VC_108_0   | 2  | 0.2145 | 0.95373122 | 0.2046 | 0 | 0 | 0 | 1 Ref      |
| ON210835 | Unassigned | Unassigned | Unassigned | 108_0   | Clustered           | 2 VC_108_0   | 2  | 0.2145 | 0.95373122 | 0.2046 | 0 | 0 | 0 | 1 Ref      |
| ON212266 | Unassigned | Unassigned | Unassigned | 133_1   | Clustered           | 6 VC_133_1   | 6  | 0.0566 | 0.99999999 | 0.0566 | 0 | 0 | 0 | 1 Ref      |
| ON229909 | Unassigned | Unassigned | Unassigned | 290_160 | Clustered/Singleton | 1 VC_290_160 | 1  | 0      | 1          | 0      | 0 | 0 | 0 | 1 Ref      |
| ON237674 | Unassigned | Unassigned | Unassigned | 713_0   | Clustered           | 26 VC_713_0  | 26 | 0.9358 | 1          | 0.9358 | 0 | 0 | 0 | 1 Ref      |
| ON239128 | Unassigned | Unassigned | Unassigned | 340_11  | Clustered           | 15 VC_340_11 | 15 | 0.079  | 1          | 0.079  | 0 | 0 | 0 | 0.9333 Ref |
| ON239131 | Unassigned | Unassigned | Unassigned | 235_0   | Clustered           | 60 VC_235_0  | 60 | 0.9413 | 1          | 0.9413 | 0 | 0 | 0 | 1 Ref      |
| ON239132 | Unassigned | Unassigned | Unassigned | 475_0   | Clustered           | 96 VC_475_0  | 96 | 0.9303 | 1          | 0.9303 | 0 | 0 | 0 | 0.9575 Ref |
| ON260812 | Unassigned | Unassigned | Unassigned | 1407_0  | Clustered           | 78 VC_1407_0 | 78 | 0.9731 | 1          | 0.9731 | 0 | 0 | 0 | 1 Ref      |
| ON260813 | Unassigned | Unassigned | Unassigned | 528_0   | Clustered           | 12 VC_528_0  | 12 | 0.3923 | 1          | 0.3923 | 0 | 0 | 0 | 0.9697 Ref |
| ON260814 | Unassigned | Unassigned | Unassigned | 1407_0  | Clustered           | 78 VC_1407_0 | 78 | 0.9731 | 1          | 0.9731 | 0 | 0 | 0 | 1 Ref      |
| ON260815 | Unassigned | Unassigned | Unassigned | 1415_0  | Clustered           | 31 VC_1415_0 | 31 | 0.8456 | 1          | 0.8456 | 0 | 0 | 0 | 1 Ref      |
| ON260816 | Unassigned | Unassigned | Unassigned | 243_0   | Clustered           | 72 VC_243_0  | 72 | 0.8089 | 1          | 0.8089 | 0 | 0 | 0 | 1 Ref      |
| ON260817 | Unassigned | Unassigned | Unassigned | 1425_0  | Clustered           | 6 VC_1425_0  | 6  | 0.2364 | 1          | 0.2364 | 0 | 0 | 0 | 1 Ref      |
| ON260818 | Unassigned | Unassigned | Unassigned | 702_0   | Clustered           | 2 VC_702_0   | 2  | 0.2123 | 0.9539194  | 0.2025 | 0 | 0 | 0 | 1 Ref      |
| ON260819 | Unassigned | Unassigned | Unassigned | 1114_0  | Clustered           | 20 VC_1114_0 | 20 | 0.3238 | 1          | 0.3238 | 0 | 0 | 0 | 0.9842 Ref |



|          |            |            |            |        |                     |              |     |        |            |        |   |   |   |            |
|----------|------------|------------|------------|--------|---------------------|--------------|-----|--------|------------|--------|---|---|---|------------|
| ON260820 | Unassigned | Unassigned | Unassigned | 1415_0 | Clustered           | 31 VC_1415_0 | 31  | 0.8456 | 1          | 0.8456 | 0 | 0 | 0 | 1 Ref      |
| ON260821 | Unassigned | Unassigned | Unassigned | 1202_0 | Clustered           | 10 VC_1202_0 | 10  | 0.5679 | 1          | 0.5679 | 0 | 0 | 0 | 1 Ref      |
| ON260822 | Unassigned | Unassigned | Unassigned | 1207_0 | Clustered           | 20 VC_1207_0 | 20  | 0.9898 | 1          | 0.9898 | 0 | 0 | 0 | 1 Ref      |
| ON260823 | Unassigned | Unassigned | Unassigned | 1296_0 | Clustered           | 82 VC_1296_0 | 82  | 0.7938 | 1          | 0.7938 | 0 | 0 | 0 | 1 Ref      |
| ON260824 | Unassigned | Unassigned | Unassigned | 579_20 | Clustered           | 17 VC_579_20 | 17  | 0.0538 | 1          | 0.0538 | 0 | 0 | 0 | 0.9926 Ref |
| ON260825 | Unassigned | Unassigned | Unassigned | 1411_0 | Clustered           | 5 VC_1411_0  | 5   | 0.5446 | 0.99999985 | 0.5446 | 0 | 0 | 0 | 1 Ref      |
| ON260826 | Unassigned | Unassigned | Unassigned | 419_0  | Clustered           | 11 VC_419_0  | 11  | 0.9465 | 1          | 0.9465 | 0 | 0 | 0 | 1 Ref      |
| ON260827 | Unassigned | Unassigned | Unassigned | 881_0  | Clustered           | 7 VC_881_0   | 7   | 0.3448 | 1          | 0.3448 | 0 | 0 | 0 | 1 Ref      |
| ON260828 | Unassigned | Unassigned | Unassigned | 1114_0 | Clustered           | 20 VC_1114_0 | 20  | 0.3238 | 1          | 0.3238 | 0 | 0 | 0 | 0.9842 Ref |
| ON260829 | Unassigned | Unassigned | Unassigned | 577_0  | Clustered           | 21 VC_577_0  | 21  | 0.9908 | 1          | 0.9908 | 0 | 0 | 0 | 1 Ref      |
| ON286972 | Unassigned | Unassigned | Unassigned | 170_3  | Clustered/Singleton | 1 VC_170_3   | 1   | 0      | 1          | 0      | 0 | 0 | 0 | 1 Ref      |
| ON286973 | Unassigned | Unassigned | Unassigned | 794_8  | Clustered           | 2 VC_794_8   | 2   | 0.006  | 0.58293682 | 0.0035 | 0 | 0 | 0 | 1 Ref      |
| ON286974 | Unassigned | Unassigned | Unassigned | 609_0  | Clustered           | 27 VC_609_0  | 27  | 0.9943 | 1          | 0.9943 | 0 | 0 | 0 | 1 Ref      |
| ON286975 | Unassigned | Unassigned | Unassigned | 794_1  | Clustered           | 2 VC_794_1   | 2   | 0.006  | 0.57682361 | 0.0034 | 0 | 0 | 0 | 1 Ref      |
| ON286976 | Unassigned | Unassigned | Unassigned | 93_0   | Clustered           | 22 VC_93_0   | 22  | 0.5285 | 1          | 0.5285 | 0 | 0 | 0 | 1 Ref      |
| ON287369 | Unassigned | Unassigned | Unassigned | 873_0  | Clustered           | 3 VC_873_0   | 3   | 0.0679 | 0.9984794  | 0.0677 | 0 | 0 | 0 | 1 Ref      |
| ON287370 | Unassigned | Unassigned | Unassigned | 456_1  | Clustered           | 3 VC_456_1   | 3   | 0.053  | 0.99419552 | 0.0527 | 0 | 0 | 0 | 1 Ref      |
| ON287372 | Unassigned | Unassigned | Unassigned | 506_1  | Clustered           | 8 VC_506_1   | 8   | 0.2893 | 1          | 0.2893 | 0 | 0 | 0 | 1 Ref      |
| ON287373 | Unassigned | Unassigned | Unassigned | 204_0  | Clustered           | 2 VC_204_0   | 2   | 0.0214 | 0.95762696 | 0.0205 | 0 | 0 | 0 | 1 Ref      |
| ON287374 | Unassigned | Unassigned | Unassigned | 873_0  | Clustered           | 3 VC_873_0   | 3   | 0.0679 | 0.9984794  | 0.0677 | 0 | 0 | 0 | 1 Ref      |
| ON287375 | Unassigned | Unassigned | Unassigned | 456_1  | Clustered           | 3 VC_456_1   | 3   | 0.053  | 0.99419552 | 0.0527 | 0 | 0 | 0 | 1 Ref      |
| ON287376 | Unassigned | Unassigned | Unassigned | 506_1  | Clustered           | 8 VC_506_1   | 8   | 0.2893 | 1          | 0.2893 | 0 | 0 | 0 | 1 Ref      |
| ON287377 | Unassigned | Unassigned | Unassigned | 907_0  | Clustered           | 32 VC_907_0  | 32  | 0.9964 | 1          | 0.9964 | 0 | 0 | 0 | 1 Ref      |
| ON287378 | Unassigned | Unassigned | Unassigned | 406_0  | Clustered           | 7 VC_406_0   | 7   | 0.176  | 1          | 0.176  | 0 | 0 | 0 | 1 Ref      |
| ON323462 | Unassigned | Unassigned | Unassigned | 134_2  | Clustered           | 17 VC_134_2  | 17  | 0.1715 | 1          | 0.1715 | 0 | 0 | 0 | 0.9853 Ref |
| ON323491 | Unassigned | Unassigned | Unassigned | 1132_0 | Clustered           | 4 VC_1132_0  | 4   | 1      | 1          | 1      | 0 | 0 | 0 | 1 Ref      |
| ON324181 | Unassigned | Unassigned | Unassigned | 80_0   | Clustered           | 64 VC_80_0   | 64  | 0.418  | 1          | 0.418  | 0 | 0 | 0 | 0.7649 Ref |
| ON331942 | Unassigned | Unassigned | Unassigned | 175_0  | Clustered           | 20 VC_175_0  | 20  | 0.7504 | 1          | 0.7504 | 0 | 0 | 0 | 1 Ref      |
| ON337194 | Unassigned | Unassigned | Unassigned | 1296_0 | Clustered           | 82 VC_1296_0 | 82  | 0.7938 | 1          | 0.7938 | 0 | 0 | 0 | 1 Ref      |
| ON337195 | Unassigned | Unassigned | Unassigned | 1208_0 | Clustered           | 6 VC_1208_0  | 6   | 0.8634 | 0.99999946 | 0.8634 | 0 | 0 | 0 | 1 Ref      |
| ON337196 | Unassigned | Unassigned | Unassigned | 533_0  | Clustered           | 16 VC_533_0  | 16  | 0.3765 | 1          | 0.3765 | 0 | 0 | 0 | 1 Ref      |
| ON352054 | Unassigned | Unassigned | Unassigned | 1003_0 | Clustered           | 16 VC_1003_0 | 16  | 0.8967 | 1          | 0.8967 | 0 | 0 | 0 | 1 Ref      |
| ON361134 | Unassigned | Unassigned | Unassigned | 81_0   | Clustered           | 41 VC_81_0   | 41  | 0.5815 | 1          | 0.5815 | 0 | 0 | 0 | 0.9805 Ref |
| ON361135 | Unassigned | Unassigned | Unassigned | 77_0   | Clustered           | 37 VC_77_0   | 37  | 0.9392 | 1          | 0.9392 | 0 | 0 | 0 | 1 Ref      |
| ON375838 | Unassigned | Unassigned | Unassigned | 80_0   | Clustered           | 64 VC_80_0   | 64  | 0.418  | 1          | 0.418  | 0 | 0 | 0 | 0.7649 Ref |
| ON375839 | Unassigned | Unassigned | Unassigned | 80_0   | Clustered           | 64 VC_80_0   | 64  | 0.418  | 1          | 0.418  | 0 | 0 | 0 | 0.7649 Ref |
| ON375840 | Unassigned | Unassigned | Unassigned | 80_0   | Clustered           | 64 VC_80_0   | 64  | 0.418  | 1          | 0.418  | 0 | 0 | 0 | 0.7649 Ref |
| ON375847 | Unassigned | Unassigned | Unassigned | 506_1  | Clustered           | 8 VC_506_1   | 8   | 0.2893 | 1          | 0.2893 | 0 | 0 | 0 | 1 Ref      |
| ON376263 | Unassigned | Unassigned | Unassigned | 486_0  | Clustered           | 47 VC_486_0  | 47  | 0.9022 | 1          | 0.9022 | 0 | 0 | 0 | 1 Ref      |
| ON381768 | Unassigned | Unassigned | Unassigned | 654_0  | Clustered           | 115 VC_654_0 | 115 | 0.7303 | 1          | 0.7303 | 0 | 0 | 0 | 0.8764 Ref |
| ON391668 | Unassigned | Unassigned | Unassigned | 655_0  | Clustered           | 45 VC_655_0  | 45  | 0.7722 | 1          | 0.7722 | 0 | 0 | 0 | 1 Ref      |
| ON391949 | Unassigned | Unassigned | Unassigned | 441_1  | Clustered           | 8 VC_441_1   | 8   | 0.5443 | 1          | 0.5443 | 0 | 0 | 0 | 0.9643 Ref |
| ON392159 | Unassigned | Unassigned | Unassigned | 1138_0 | Clustered           | 16 VC_1138_0 | 16  | 0.4566 | 1          | 0.4566 | 0 | 0 | 0 | 1 Ref      |
| ON392160 | Unassigned | Unassigned | Unassigned | 783_0  | Clustered           | 67 VC_783_0  | 67  | 0.8945 | 1          | 0.8945 | 0 | 0 | 0 | 1 Ref      |
| ON392161 | Unassigned | Unassigned | Unassigned | 1407_0 | Clustered           | 78 VC_1407_0 | 78  | 0.9731 | 1          | 0.9731 | 0 | 0 | 0 | 1 Ref      |
| ON392162 | Unassigned | Unassigned | Unassigned | 783_0  | Clustered           | 67 VC_783_0  | 67  | 0.8945 | 1          | 0.8945 | 0 | 0 | 0 | 1 Ref      |
| ON392166 | Unassigned | Unassigned | Unassigned | 1076_0 | Clustered           | 6 VC_1076_0  | 6   | 0.6773 | 1          | 0.6773 | 0 | 0 | 0 | 1 Ref      |
| ON399185 | Unassigned | Unassigned | Unassigned | 134_2  | Clustered           | 17 VC_134_2  | 17  | 0.1715 | 1          | 0.1715 | 0 | 0 | 0 | 0.9853 Ref |
| ON409568 | Unassigned | Unassigned | Unassigned | 654_0  | Clustered           | 115 VC_654_0 | 115 | 0.7303 | 1          | 0.7303 | 0 | 0 | 0 | 0.8764 Ref |
| ON409569 | Unassigned | Unassigned | Unassigned | 654_0  | Clustered           | 115 VC_654_0 | 115 | 0.7303 | 1          | 0.7303 | 0 | 0 | 0 | 0.8764 Ref |
| ON409570 | Unassigned | Unassigned | Unassigned | 654_0  | Clustered           | 115 VC_654_0 | 115 | 0.7303 | 1          | 0.7303 | 0 | 0 | 0 | 0.8764 Ref |
| ON416862 | Unassigned | Unassigned | Unassigned | 42_0   | Clustered           | 5 VC_42_0    | 5   | 0.0844 | 0.99999995 | 0.0844 | 0 | 0 | 0 | 1 Ref      |
| ON454038 | Unassigned | Unassigned | Unassigned | 654_0  | Clustered           | 115 VC_654_0 | 115 | 0.7303 | 1          | 0.7303 | 0 | 0 | 0 | 0.8764 Ref |
| ON456151 | Unassigned | Unassigned | Unassigned | 392_0  | Clustered           | 9 VC_392_0   | 9   | 0.7527 | 1          | 0.7527 | 0 | 0 | 0 | 1 Ref      |
| ON456330 | Unassigned | Unassigned | Unassigned | 384_13 | Clustered           | 33 VC_384_13 | 33  | 0.1785 | 1          | 0.1785 | 0 | 0 | 0 | 0.8769 Ref |
| ON456331 | Unassigned | Unassigned | Unassigned | 895_0  | Clustered           | 25 VC_895_0  | 25  | 0.5768 | 1          | 0.5768 | 0 | 0 | 0 | 1 Ref      |
| ON456332 | Unassigned | Unassigned | Unassigned | 384_12 | Clustered           | 4 VC_384_12  | 4   | 0.0125 | 0.99998491 | 0.0125 | 0 | 0 | 0 | 0.8333 Ref |
| ON456333 | Unassigned | Unassigned | Unassigned | 789_0  | Clustered           | 34 VC_789_0  | 34  | 0.9167 | 1          | 0.9167 | 0 | 0 | 0 | 1 Ref      |
| ON456334 | Unassigned | Unassigned | Unassigned | 578_1  | Clustered           | 11 VC_578_1  | 11  | 0.4919 | 1          | 0.4919 | 0 | 0 | 0 | 0.7818 Ref |
| ON456335 | Unassigned | Unassigned | Unassigned | 1204_0 | Clustered           | 25 VC_1204_0 | 25  | 0.7382 | 1          | 0.7382 | 0 | 0 | 0 | 1 Ref      |
| ON456336 | Unassigned | Unassigned | Unassigned | 1136_0 | Clustered           | 40 VC_1136_0 | 40  | 0.8746 | 1          | 0.8746 | 0 | 0 | 0 | 1 Ref      |
| ON456337 | Unassigned | Unassigned | Unassigned | 1138_0 | Clustered           | 16 VC_1138_0 | 16  | 0.4566 | 1          | 0.4566 | 0 | 0 | 0 | 1 Ref      |
| ON456338 | Unassigned | Unassigned | Unassigned | 1416_0 | Clustered           | 10 VC_1416_0 | 10  | 1      | 1          | 1      | 0 | 0 | 0 | 1 Ref      |
| ON456339 | Unassigned | Unassigned | Unassigned | 243_0  | Clustered           | 72 VC_243_0  | 72  | 0.8089 | 1          | 0.8089 | 0 | 0 | 0 | 1 Ref      |
| ON456340 | Unassigned | Unassigned | Unassigned | 1204_0 | Clustered           | 25 VC_1204_0 | 25  | 0.7382 | 1          | 0.7382 | 0 | 0 | 0 | 1 Ref      |
| ON456342 | Unassigned | Unassigned | Unassigned | 384_0  | Clustered           | 2 VC_384_0   | 2   | 0.0032 | 0.9473459  | 0.003  | 0 | 0 | 0 | 1 Ref      |
| ON456343 | Unassigned | Unassigned | Unassigned | 1115_2 | Clustered           | 5 VC_1115_2  | 5   | 0.0998 | 0.99999315 | 0.0998 | 0 | 0 | 0 | 1 Ref      |
| ON456344 | Unassigned | Unassigned | Unassigned | 579_70 | Clustered/Singleton | 1 VC_579_70  | 1   | 0      | 1          | 0      | 0 | 0 | 0 | 1 Ref      |
| ON456345 | Unassigned | Unassigned | Unassigned | 571_7  | Clustered           | 28 VC_571_7  | 28  | 0.1651 | 1          | 0.1651 | 0 | 0 | 0 | 0.8519 Ref |
| ON456346 | Unassigned | Unassigned | Unassigned | 1424_0 | Clustered           | 31 VC_1424_0 | 31  | 0.8834 | 1          | 0.8834 | 0 | 0 | 0 | 1 Ref      |
| ON456348 | Unassigned | Unassigned | Unassigned | 1416_0 | Clustered           | 10 VC_1416_0 | 10  | 1      | 1          | 1      | 0 | 0 | 0 | 1 Ref      |
| ON456349 | Unassigned | Unassigned | Unassigned | 1138_0 | Clustered           | 16 VC_1138_0 | 16  | 0.4566 | 1          | 0.4566 | 0 | 0 | 0 | 1 Ref      |
| ON456350 | Unassigned | Unassigned | Unassigned | 1407_0 | Clustered           | 78 VC_1407_0 | 78  | 0.9731 | 1          | 0.9731 | 0 | 0 | 0 | 1 Ref      |
| ON456351 | Unassigned | Unassigned | Unassigned | 244_2  | Clustered           | 11 VC_244_2  | 11  | 0.1403 | 1          | 0.1403 | 0 | 0 | 0 | 0.9818 Ref |
| ON456352 | Unassigned | Unassigned | Unassigned | 423_0  | Clustered           | 7 VC_423_0   | 7   | 0.7874 | 1          | 0.7874 | 0 | 0 | 0 | 1 Ref      |
| ON456353 | Unassigned | Unassigned | Unassigned | 243_0  | Clustered           | 72 VC_243_0  | 72  | 0.8089 | 1          | 0.8089 | 0 | 0 | 0 | 1 Ref      |
| ON456354 | Unassigned | Unassigned | Unassigned | 1296_0 | Clustered           | 82 VC_1296_0 | 82  | 0.7938 | 1          | 0.7938 | 0 | 0 | 0 | 1 Ref      |
| ON456356 | Unassigned | Unassigned | Unassigned | 538_43 | Clustered           | 3 VC_538_43  | 3   | 0.0193 | 0.99837043 | 0.0192 | 0 | 0 | 0 | 1 Ref      |
| ON457554 | Unassigned | Unassigned | Unassigned | 861_0  | Clustered           | 29 VC_861_0  | 29  | 0.9954 | 1          | 0.9954 | 0 | 0 | 0 | 1 Ref      |
| ON457555 | Unassigned | Unassigned | Unassigned | 861_0  | Clustered           | 29 VC_861_0  | 29  | 0.9954 | 1          | 0.9954 | 0 | 0 | 0 | 1 Ref      |
| ON457556 | Unassigned | Unassigned | Unassigned | 861_0  | Clustered           | 29 VC_861_0  | 29  | 0.9954 | 1          | 0.9954 | 0 | 0 | 0 | 1 Ref      |



|          |            |            |            |         |                     |              |     |        |            |        |   |   |   |            |
|----------|------------|------------|------------|---------|---------------------|--------------|-----|--------|------------|--------|---|---|---|------------|
| ON457557 | Unassigned | Unassigned | Unassigned | 861_0   | Clustered           | 29 VC_861_0  | 29  | 0.9954 | 1          | 0.9954 | 0 | 0 | 0 | 1 Ref      |
| ON457558 | Unassigned | Unassigned | Unassigned | 821_0   | Clustered           | 5 VC_821_0   | 5   | 0.2385 | 0.99999997 | 0.2385 | 0 | 0 | 0 | 1 Ref      |
| ON457559 | Unassigned | Unassigned | Unassigned | 821_0   | Clustered           | 5 VC_821_0   | 5   | 0.2385 | 0.99999997 | 0.2385 | 0 | 0 | 0 | 1 Ref      |
| ON461912 | Unassigned | Unassigned | Unassigned | 466_0   | Clustered           | 66 VC_466_0  | 66  | 0.9246 | 1          | 0.9246 | 0 | 0 | 0 | 1 Ref      |
| ON464735 | Unassigned | Unassigned | Unassigned | 83_0    | Clustered           | 24 VC_83_0   | 24  | 0.7345 | 1          | 0.7345 | 0 | 0 | 0 | 1 Ref      |
| ON464736 | Unassigned | Unassigned | Unassigned | 83_0    | Clustered           | 24 VC_83_0   | 24  | 0.7345 | 1          | 0.7345 | 0 | 0 | 0 | 1 Ref      |
| ON464759 | Unassigned | Unassigned | Unassigned | 1546_0  | Clustered           | 3 VC_1546_0  | 3   | 1      | 0          | 0      | 0 | 0 | 0 | 1 Ref      |
| ON464760 | Unassigned | Unassigned | Unassigned | 731_0   | Clustered           | 3 VC_731_0   | 3   | 0.5794 | 0.99799987 | 0.5782 | 0 | 0 | 0 | 1 Ref      |
| ON464761 | Unassigned | Unassigned | Unassigned | 731_0   | Clustered           | 3 VC_731_0   | 3   | 0.5794 | 0.99799987 | 0.5782 | 0 | 0 | 0 | 1 Ref      |
| ON464762 | Unassigned | Unassigned | Unassigned | 731_0   | Clustered           | 3 VC_731_0   | 3   | 0.5794 | 0.99799987 | 0.5782 | 0 | 0 | 0 | 1 Ref      |
| ON464763 | Unassigned | Unassigned | Unassigned | 1546_0  | Clustered           | 3 VC_1546_0  | 3   | 1      | 0          | 0      | 0 | 0 | 0 | 1 Ref      |
| ON464764 | Unassigned | Unassigned | Unassigned | 1546_0  | Clustered           | 3 VC_1546_0  | 3   | 1      | 0          | 0      | 0 | 0 | 0 | 1 Ref      |
| ON470578 | Unassigned | Unassigned | Unassigned | 53_0    | Clustered           | 10 VC_53_0   | 10  | 0.1743 | 1          | 0.1743 | 0 | 0 | 0 | 1 Ref      |
| ON470579 | Unassigned | Unassigned | Unassigned | 249_1   | Clustered           | 21 VC_249_1  | 21  | 0.6775 | 1          | 0.6775 | 0 | 0 | 0 | 0.8476 Ref |
| ON470582 | Unassigned | Unassigned | Unassigned | 249_1   | Clustered           | 21 VC_249_1  | 21  | 0.6775 | 1          | 0.6775 | 0 | 0 | 0 | 0.8476 Ref |
| ON470584 | Unassigned | Unassigned | Unassigned | 47_0    | Clustered           | 12 VC_47_0   | 12  | 0.3571 | 1          | 0.3571 | 0 | 0 | 0 | 1 Ref      |
| ON470588 | Unassigned | Unassigned | Unassigned | 249_1   | Clustered           | 21 VC_249_1  | 21  | 0.6775 | 1          | 0.6775 | 0 | 0 | 0 | 0.8476 Ref |
| ON470589 | Unassigned | Unassigned | Unassigned | 32_1    | Clustered           | 16 VC_32_1   | 16  | 0.1962 | 1          | 0.1962 | 0 | 0 | 0 | 0.8333 Ref |
| ON470593 | Unassigned | Unassigned | Unassigned | 249_1   | Clustered           | 21 VC_249_1  | 21  | 0.6775 | 1          | 0.6775 | 0 | 0 | 0 | 0.8476 Ref |
| ON470594 | Unassigned | Unassigned | Unassigned | 32_1    | Clustered           | 16 VC_32_1   | 16  | 0.1962 | 1          | 0.1962 | 0 | 0 | 0 | 0.8333 Ref |
| ON470596 | Unassigned | Unassigned | Unassigned | 59_0    | Clustered           | 4 VC_59_0    | 4   | 0.4063 | 0.99998677 | 0.4062 | 0 | 0 | 0 | 1 Ref      |
| ON470597 | Unassigned | Unassigned | Unassigned | 43_0    | Clustered           | 16 VC_43_0   | 16  | 0.2017 | 1          | 0.2017 | 0 | 0 | 0 | 0.9667 Ref |
| ON470598 | Unassigned | Unassigned | Unassigned | 53_0    | Clustered           | 10 VC_53_0   | 10  | 0.1743 | 1          | 0.1743 | 0 | 0 | 0 | 1 Ref      |
| ON470601 | Unassigned | Unassigned | Unassigned | 235_0   | Clustered           | 60 VC_235_0  | 60  | 0.9413 | 1          | 0.9413 | 0 | 0 | 0 | 1 Ref      |
| ON470603 | Unassigned | Unassigned | Unassigned | 47_0    | Clustered           | 12 VC_47_0   | 12  | 0.3571 | 1          | 0.3571 | 0 | 0 | 0 | 1 Ref      |
| ON470604 | Unassigned | Unassigned | Unassigned | 59_0    | Clustered           | 4 VC_59_0    | 4   | 0.4063 | 0.99998677 | 0.4062 | 0 | 0 | 0 | 1 Ref      |
| ON470605 | Unassigned | Unassigned | Unassigned | 32_1    | Clustered           | 16 VC_32_1   | 16  | 0.1962 | 1          | 0.1962 | 0 | 0 | 0 | 0.8333 Ref |
| ON470606 | Unassigned | Unassigned | Unassigned | 235_0   | Clustered           | 60 VC_235_0  | 60  | 0.9413 | 1          | 0.9413 | 0 | 0 | 0 | 1 Ref      |
| ON470613 | Unassigned | Unassigned | Unassigned | 235_0   | Clustered           | 60 VC_235_0  | 60  | 0.9413 | 1          | 0.9413 | 0 | 0 | 0 | 1 Ref      |
| ON470615 | Unassigned | Unassigned | Unassigned | 254_0   | Clustered           | 14 VC_254_0  | 14  | 0.9118 | 1          | 0.9118 | 0 | 0 | 0 | 0.967 Ref  |
| ON470617 | Unassigned | Unassigned | Unassigned | 254_0   | Clustered           | 14 VC_254_0  | 14  | 0.9118 | 1          | 0.9118 | 0 | 0 | 0 | 0.967 Ref  |
| ON470618 | Unassigned | Unassigned | Unassigned | 53_0    | Clustered           | 10 VC_53_0   | 10  | 0.1743 | 1          | 0.1743 | 0 | 0 | 0 | 1 Ref      |
| ON470620 | Unassigned | Unassigned | Unassigned | 6_0     | Clustered           | 44 VC_6_0    | 44  | 0.9068 | 1          | 0.9068 | 0 | 0 | 0 | 1 Ref      |
| ON470624 | Unassigned | Unassigned | Unassigned | 59_0    | Clustered           | 4 VC_59_0    | 4   | 0.4063 | 0.99998677 | 0.4062 | 0 | 0 | 0 | 1 Ref      |
| ON470625 | Unassigned | Unassigned | Unassigned | 43_0    | Clustered           | 16 VC_43_0   | 16  | 0.2017 | 1          | 0.2017 | 0 | 0 | 0 | 0.9667 Ref |
| ON470627 | Unassigned | Unassigned | Unassigned | 59_0    | Clustered           | 4 VC_59_0    | 4   | 0.4063 | 0.99998677 | 0.4062 | 0 | 0 | 0 | 1 Ref      |
| ON480525 | Unassigned | Unassigned | Unassigned | 713_0   | Clustered           | 26 VC_713_0  | 26  | 0.9358 | 1          | 0.9358 | 0 | 0 | 0 | 1 Ref      |
| ON489264 | Unassigned | Unassigned | Unassigned | 972_0   | Clustered           | 99 VC_972_0  | 99  | 0.9113 | 1          | 0.9113 | 0 | 0 | 0 | 0.9928 Ref |
| ON506924 | Unassigned | Unassigned | Unassigned | 290_96  | Clustered/Singleton | 1 VC_290_96  | 1   | 0      | 1          | 0      | 0 | 0 | 0 | 1 Ref      |
| ON506926 | Unassigned | Unassigned | Unassigned | 707_0   | Clustered           | 2 VC_707_0   | 2   | 0.1033 | 0.95358314 | 0.0985 | 0 | 0 | 0 | 1 Ref      |
| ON506927 | Unassigned | Unassigned | Unassigned | 94_0    | Clustered           | 22 VC_94_0   | 22  | 0.5602 | 1          | 0.5602 | 0 | 0 | 0 | 1 Ref      |
| ON506928 | Unassigned | Unassigned | Unassigned | 94_0    | Clustered           | 22 VC_94_0   | 22  | 0.5602 | 1          | 0.5602 | 0 | 0 | 0 | 1 Ref      |
| ON513429 | Unassigned | Unassigned | Unassigned | 714_0   | Clustered           | 71 VC_714_0  | 71  | 0.935  | 1          | 0.935  | 0 | 0 | 0 | 1 Ref      |
| ON515458 | Unassigned | Unassigned | Unassigned | 686_0   | Clustered           | 25 VC_686_0  | 25  | 0.5501 | 1          | 0.5501 | 0 | 0 | 0 | 0.96 Ref   |
| ON526838 | Unassigned | Unassigned | Unassigned | 654_0   | Clustered           | 115 VC_654_0 | 115 | 0.7303 | 1          | 0.7303 | 0 | 0 | 0 | 0.8764 Ref |
| ON526839 | Unassigned | Unassigned | Unassigned | 466_0   | Clustered           | 66 VC_466_0  | 66  | 0.9246 | 1          | 0.9246 | 0 | 0 | 0 | 1 Ref      |
| ON526840 | Unassigned | Unassigned | Unassigned | 199_32  | Clustered           | 12 VC_199_32 | 12  | 0.0676 | 1          | 0.0676 | 0 | 0 | 0 | 0.7576 Ref |
| ON526969 | Unassigned | Unassigned | Unassigned | 1083_0  | Clustered           | 4 VC_1083_0  | 4   | 0.8577 | 0.99997306 | 0.8576 | 0 | 0 | 0 | 1 Ref      |
| ON526970 | Unassigned | Unassigned | Unassigned | 1015_0  | Clustered           | 3 VC_1015_0  | 3   | 0.0529 | 0.99853685 | 0.0528 | 0 | 0 | 0 | 1 Ref      |
| ON526971 | Unassigned | Unassigned | Unassigned | 898_1   | Clustered           | 27 VC_898_1  | 27  | 0.8894 | 1          | 0.8894 | 0 | 0 | 0 | 1 Ref      |
| ON526972 | Unassigned | Unassigned | Unassigned | 1203_0  | Clustered           | 28 VC_1203_0 | 28  | 0.4905 | 1          | 0.4905 | 0 | 0 | 0 | 1 Ref      |
| ON526973 | Unassigned | Unassigned | Unassigned | 893_0   | Clustered           | 4 VC_893_0   | 4   | 0.0787 | 0.99998595 | 0.0787 | 0 | 0 | 0 | 1 Ref      |
| ON526974 | Unassigned | Unassigned | Unassigned | 1015_0  | Clustered           | 3 VC_1015_0  | 3   | 0.0529 | 0.99853685 | 0.0528 | 0 | 0 | 0 | 1 Ref      |
| ON526975 | Unassigned | Unassigned | Unassigned | 894_0   | Clustered           | 6 VC_894_0   | 6   | 0.3171 | 1          | 0.3171 | 0 | 0 | 0 | 1 Ref      |
| ON526976 | Unassigned | Unassigned | Unassigned | 538_30  | Clustered           | 2 VC_538_30  | 2   | 0.0072 | 0.954469   | 0.0069 | 0 | 0 | 0 | 1 Ref      |
| ON526977 | Unassigned | Unassigned | Unassigned | 1406_0  | Clustered           | 21 VC_1406_0 | 21  | 0.9836 | 1          | 0.9836 | 0 | 0 | 0 | 1 Ref      |
| ON526978 | Unassigned | Unassigned | Unassigned | 241_0   | Clustered           | 21 VC_241_0  | 21  | 0.8342 | 1          | 0.8342 | 0 | 0 | 0 | 1 Ref      |
| ON526979 | Unassigned | Unassigned | Unassigned | 891_0   | Clustered           | 11 VC_891_0  | 11  | 0.9663 | 1          | 0.9663 | 0 | 0 | 0 | 1 Ref      |
| ON526980 | Unassigned | Unassigned | Unassigned | 1425_0  | Clustered           | 6 VC_1425_0  | 6   | 0.2364 | 1          | 0.2364 | 0 | 0 | 0 | 1 Ref      |
| ON526981 | Unassigned | Unassigned | Unassigned | 578_1   | Clustered           | 11 VC_578_1  | 11  | 0.4919 | 1          | 0.4919 | 0 | 0 | 0 | 0.7818 Ref |
| ON526982 | Unassigned | Unassigned | Unassigned | 579_14  | Clustered           | 8 VC_579_14  | 8   | 0.0227 | 0.99904117 | 0.0227 | 0 | 0 | 0 | 0.8214 Ref |
| ON526984 | Unassigned | Unassigned | Unassigned | 243_0   | Clustered           | 72 VC_243_0  | 72  | 0.8089 | 1          | 0.8089 | 0 | 0 | 0 | 1 Ref      |
| ON526985 | Unassigned | Unassigned | Unassigned | 1016_0  | Clustered           | 62 VC_1016_0 | 62  | 0.8638 | 1          | 0.8638 | 0 | 0 | 0 | 0.743 Ref  |
| ON528715 | Unassigned | Unassigned | Unassigned | 405_0   | Clustered           | 126 VC_405_0 | 126 | 0.9614 | 1          | 0.9614 | 0 | 0 | 0 | 1 Ref      |
| ON528716 | Unassigned | Unassigned | Unassigned | 405_0   | Clustered           | 126 VC_405_0 | 126 | 0.9614 | 1          | 0.9614 | 0 | 0 | 0 | 1 Ref      |
| ON528717 | Unassigned | Unassigned | Unassigned | 405_0   | Clustered           | 126 VC_405_0 | 126 | 0.9614 | 1          | 0.9614 | 0 | 0 | 0 | 1 Ref      |
| ON528718 | Unassigned | Unassigned | Unassigned | 975_0   | Clustered           | 40 VC_975_0  | 40  | 0.6888 | 1          | 0.6888 | 0 | 0 | 0 | 1 Ref      |
| ON528719 | Unassigned | Unassigned | Unassigned | 405_0   | Clustered           | 126 VC_405_0 | 126 | 0.9614 | 1          | 0.9614 | 0 | 0 | 0 | 1 Ref      |
| ON528720 | Unassigned | Unassigned | Unassigned | 398_0   | Clustered           | 51 VC_398_0  | 51  | 0.8741 | 1          | 0.8741 | 0 | 0 | 0 | 1 Ref      |
| ON528721 | Unassigned | Unassigned | Unassigned | 398_0   | Clustered           | 51 VC_398_0  | 51  | 0.8741 | 1          | 0.8741 | 0 | 0 | 0 | 1 Ref      |
| ON528722 | Unassigned | Unassigned | Unassigned | 398_0   | Clustered           | 51 VC_398_0  | 51  | 0.8741 | 1          | 0.8741 | 0 | 0 | 0 | 1 Ref      |
| ON528723 | Unassigned | Unassigned | Unassigned | 398_0   | Clustered           | 51 VC_398_0  | 51  | 0.8741 | 1          | 0.8741 | 0 | 0 | 0 | 1 Ref      |
| ON528724 | Unassigned | Unassigned | Unassigned | 398_0   | Clustered           | 51 VC_398_0  | 51  | 0.8741 | 1          | 0.8741 | 0 | 0 | 0 | 1 Ref      |
| ON528725 | Unassigned | Unassigned | Unassigned | 293_15  | Clustered           | 2 VC_293_15  | 2   | 0.0073 | 0.75626308 | 0.0055 | 0 | 0 | 0 | 1 Ref      |
| ON528726 | Unassigned | Unassigned | Unassigned | 290_142 | Clustered           | 2 VC_290_142 | 2   | 0.0028 | 0.94207769 | 0.0027 | 0 | 0 | 0 | 1 Ref      |
| ON528727 | Unassigned | Unassigned | Unassigned | 290_29  | Clustered/Singleton | 1 VC_290_29  | 1   | 0      | 1          | 0      | 0 | 0 | 0 | 1 Ref      |
| ON528728 | Unassigned | Unassigned | Unassigned | 290_30  | Clustered/Singleton | 1 VC_290_30  | 1   | 0      | 1          | 0      | 0 | 0 | 0 | 1 Ref      |
| ON528729 | Unassigned | Unassigned | Unassigned | 341_0   | Clustered           | 27 VC_341_0  | 27  | 0.5058 | 1          | 0.5058 | 0 | 0 | 0 | 0.8661 Ref |
| ON528730 | Unassigned | Unassigned | Unassigned | 341_0   | Clustered           | 27 VC_341_0  | 27  | 0.5058 | 1          | 0.5058 | 0 | 0 | 0 | 0.8661 Ref |
| ON528731 | Unassigned | Unassigned | Unassigned | 341_0   | Clustered           | 27 VC_341_0  | 27  | 0.5058 | 1          | 0.5058 | 0 | 0 | 0 | 0.8661 Ref |
| ON528732 | Unassigned | Unassigned | Unassigned | 341_0   | Clustered           | 27 VC_341_0  | 27  | 0.5058 | 1          | 0.5058 | 0 | 0 | 0 | 0.8661 Ref |



|          |            |            |            |         |                     |              |     |        |            |        |   |   |   |            |
|----------|------------|------------|------------|---------|---------------------|--------------|-----|--------|------------|--------|---|---|---|------------|
| ONS28733 | Unassigned | Unassigned | Unassigned | 465_0   | Clustered           | 80 VC_465_0  | 80  | 0.9988 | 1          | 0.9988 | 0 | 0 | 0 | 1 Ref      |
| ONS28734 | Unassigned | Unassigned | Unassigned | 290_86  | Clustered/Singleton | 1 VC_290_86  | 1   | 0      | 1          | 0      | 0 | 0 | 0 | 1 Ref      |
| ONS28735 | Unassigned | Unassigned | Unassigned | 290_103 | Clustered/Singleton | 1 VC_290_103 | 1   | 0      | 1          | 0      | 0 | 0 | 0 | 1 Ref      |
| ONS28736 | Unassigned | Unassigned | Unassigned | 290_149 | Clustered/Singleton | 1 VC_290_149 | 1   | 0      | 1          | 0      | 0 | 0 | 0 | 1 Ref      |
| ONS28737 | Unassigned | Unassigned | Unassigned | 293_10  | Clustered           | 9 VC_293_10  | 9   | 0.0615 | 0.99999884 | 0.0615 | 0 | 0 | 0 | 0.6667 Ref |
| ONS28738 | Unassigned | Unassigned | Unassigned | 290_87  | Clustered/Singleton | 1 VC_290_87  | 1   | 0      | 1          | 0      | 0 | 0 | 0 | 1 Ref      |
| ONS28739 | Unassigned | Unassigned | Unassigned | 290_107 | Clustered/Singleton | 1 VC_290_107 | 1   | 0      | 1          | 0      | 0 | 0 | 0 | 1 Ref      |
| ONS28740 | Unassigned | Unassigned | Unassigned | 290_132 | Clustered/Singleton | 1 VC_290_132 | 1   | 0      | 1          | 0      | 0 | 0 | 0 | 1 Ref      |
| ONS28741 | Unassigned | Unassigned | Unassigned | 290_11  | Clustered/Singleton | 1 VC_290_11  | 1   | 0      | 1          | 0      | 0 | 0 | 0 | 1 Ref      |
| ONS28742 | Unassigned | Unassigned | Unassigned | 290_186 | Clustered/Singleton | 1 VC_290_186 | 1   | 0      | 1          | 0      | 0 | 0 | 0 | 1 Ref      |
| ONS28743 | Unassigned | Unassigned | Unassigned | 290_55  | Clustered/Singleton | 1 VC_290_55  | 1   | 0      | 1          | 0      | 0 | 0 | 0 | 1 Ref      |
| ONS28744 | Unassigned | Unassigned | Unassigned | 290_142 | Clustered           | 2 VC_290_142 | 2   | 0.0028 | 0.94207769 | 0.0027 | 0 | 0 | 0 | 1 Ref      |
| ONS28745 | Unassigned | Unassigned | Unassigned | 290_13  | Clustered/Singleton | 1 VC_290_13  | 1   | 0      | 1          | 0      | 0 | 0 | 0 | 1 Ref      |
| ONS28746 | Unassigned | Unassigned | Unassigned | 290_146 | Clustered/Singleton | 1 VC_290_146 | 1   | 0      | 1          | 0      | 0 | 0 | 0 | 1 Ref      |
| ONS28933 | Unassigned | Unassigned | Unassigned | 1250_0  | Clustered           | 29 VC_1250_0 | 29  | 0.822  | 1          | 0.822  | 0 | 0 | 0 | 1 Ref      |
| ONS28935 | Unassigned | Unassigned | Unassigned | 18_0    | Clustered           | 4 VC_18_0    | 4   | 0.8969 | 0.99987935 | 0.8968 | 0 | 0 | 0 | 1 Ref      |
| ONS29291 | Unassigned | Unassigned | Unassigned | 80_0    | Clustered           | 64 VC_80_0   | 64  | 0.418  | 1          | 0.418  | 0 | 0 | 0 | 0.7649 Ref |
| ONS29850 | Unassigned | Unassigned | Unassigned | 1011_0  | Clustered           | 2 VC_1011_0  | 2   | 0.0302 | 0.92749365 | 0.028  | 0 | 0 | 0 | 1 Ref      |
| ONS29851 | Unassigned | Unassigned | Unassigned | 1011_1  | Clustered           | 5 VC_1011_1  | 5   | 0.1308 | 0.99999971 | 0.1308 | 0 | 0 | 0 | 0.9 Ref    |
| ONS29852 | Unassigned | Unassigned | Unassigned | 1011_1  | Clustered           | 5 VC_1011_1  | 5   | 0.1308 | 0.99999971 | 0.1308 | 0 | 0 | 0 | 0.9 Ref    |
| ONS29853 | Unassigned | Unassigned | Unassigned | 1011_1  | Clustered           | 5 VC_1011_1  | 5   | 0.1308 | 0.99999971 | 0.1308 | 0 | 0 | 0 | 0.9 Ref    |
| ONS29854 | Unassigned | Unassigned | Unassigned | 175_0   | Clustered           | 20 VC_175_0  | 20  | 0.7504 | 1          | 0.7504 | 0 | 0 | 0 | 1 Ref      |
| ONS29855 | Unassigned | Unassigned | Unassigned | 1011_1  | Clustered           | 5 VC_1011_1  | 5   | 0.1308 | 0.99999971 | 0.1308 | 0 | 0 | 0 | 0.9 Ref    |
| ONS29856 | Unassigned | Unassigned | Unassigned | 481_0   | Clustered           | 5 VC_481_0   | 5   | 0.6783 | 0.99999996 | 0.6783 | 0 | 0 | 0 | 1 Ref      |
| ONS29857 | Unassigned | Unassigned | Unassigned | 1011_0  | Clustered           | 2 VC_1011_0  | 2   | 0.0302 | 0.92749365 | 0.028  | 0 | 0 | 0 | 1 Ref      |
| ONS29858 | Unassigned | Unassigned | Unassigned | 1011_5  | Clustered/Singleton | 1 VC_1011_5  | 1   | 0      | 1          | 0      | 0 | 0 | 0 | 1 Ref      |
| ONS29859 | Unassigned | Unassigned | Unassigned | 481_0   | Clustered           | 5 VC_481_0   | 5   | 0.6783 | 0.99999996 | 0.6783 | 0 | 0 | 0 | 1 Ref      |
| ONS29860 | Unassigned | Unassigned | Unassigned | 1011_1  | Clustered           | 5 VC_1011_1  | 5   | 0.1308 | 0.99999971 | 0.1308 | 0 | 0 | 0 | 0.9 Ref    |
| ONS29862 | Unassigned | Unassigned | Unassigned | 481_0   | Clustered           | 5 VC_481_0   | 5   | 0.6783 | 0.99999996 | 0.6783 | 0 | 0 | 0 | 1 Ref      |
| ONS29863 | Unassigned | Unassigned | Unassigned | 1504_0  | Clustered           | 2 VC_1504_0  | 2   | 0.8464 | 0.89435023 | 0.757  | 0 | 0 | 0 | 1 Ref      |
| ONS29864 | Unassigned | Unassigned | Unassigned | 481_0   | Clustered           | 5 VC_481_0   | 5   | 0.6783 | 0.99999996 | 0.6783 | 0 | 0 | 0 | 1 Ref      |
| ONS29865 | Unassigned | Unassigned | Unassigned | 1547_0  | Clustered           | 2 VC_1547_0  | 2   | 1      | 1          | 1      | 0 | 0 | 0 | 1 Ref      |
| ONS29866 | Unassigned | Unassigned | Unassigned | 1547_0  | Clustered           | 2 VC_1547_0  | 2   | 1      | 1          | 1      | 0 | 0 | 0 | 1 Ref      |
| ONS29867 | Unassigned | Unassigned | Unassigned | 1504_0  | Clustered           | 2 VC_1504_0  | 2   | 0.8464 | 0.89435023 | 0.757  | 0 | 0 | 0 | 1 Ref      |
| ONS29868 | Unassigned | Unassigned | Unassigned | 71_0    | Clustered           | 27 VC_71_0   | 27  | 0.5964 | 1          | 0.5964 | 0 | 0 | 0 | 0.9943 Ref |
| ONS40300 | Unassigned | Unassigned | Unassigned | 340_18  | Clustered           | 7 VC_340_18  | 7   | 0.0326 | 1          | 0.0326 | 0 | 0 | 0 | 0.8095 Ref |
| ONS40301 | Unassigned | Unassigned | Unassigned | 654_0   | Clustered           | 115 VC_654_0 | 115 | 0.7303 | 1          | 0.7303 | 0 | 0 | 0 | 0.8764 Ref |
| ONS48417 | Unassigned | Unassigned | Unassigned | 489_5   | Clustered           | 2 VC_489_5   | 2   | 0.0295 | 0.93803098 | 0.0276 | 0 | 0 | 0 | 1 Ref      |
| ONS48418 | Unassigned | Unassigned | Unassigned | 489_10  | Clustered           | 2 VC_489_10  | 2   | 0.0285 | 0.87435299 | 0.0249 | 0 | 0 | 0 | 1 Ref      |
| ONS48419 | Unassigned | Unassigned | Unassigned | 489_5   | Clustered           | 2 VC_489_5   | 2   | 0.0295 | 0.93803098 | 0.0276 | 0 | 0 | 0 | 1 Ref      |
| ONS48420 | Unassigned | Unassigned | Unassigned | 489_2   | Clustered           | 3 VC_489_2   | 3   | 0.0584 | 0.98697745 | 0.0577 | 0 | 0 | 0 | 1 Ref      |
| ONS48421 | Unassigned | Unassigned | Unassigned | 489_9   | Clustered/Singleton | 1 VC_489_9   | 1   | 0      | 1          | 0      | 0 | 0 | 0 | 1 Ref      |
| ONS48432 | Unassigned | Unassigned | Unassigned | 655_0   | Clustered           | 45 VC_655_0  | 45  | 0.7722 | 1          | 0.7722 | 0 | 0 | 0 | 1 Ref      |
| ONS48433 | Unassigned | Unassigned | Unassigned | 465_0   | Clustered           | 80 VC_465_0  | 80  | 0.9988 | 1          | 0.9988 | 0 | 0 | 0 | 1 Ref      |
| ONS50260 | Unassigned | Unassigned | Unassigned | 509_0   | Clustered           | 36 VC_509_0  | 36  | 0.5291 | 1          | 0.5291 | 0 | 0 | 0 | 0.9714 Ref |
| ONS51388 | Unassigned | Unassigned | Unassigned | 579_75  | Clustered/Singleton | 1 VC_579_75  | 1   | 0      | 1          | 0      | 0 | 0 | 0 | 1 Ref      |
| ONS56632 | Unassigned | Unassigned | Unassigned | 655_0   | Clustered           | 45 VC_655_0  | 45  | 0.7722 | 1          | 0.7722 | 0 | 0 | 0 | 1 Ref      |
| ONS68193 | Unassigned | Unassigned | Unassigned | 405_0   | Clustered           | 126 VC_405_0 | 126 | 0.9614 | 1          | 0.9614 | 0 | 0 | 0 | 1 Ref      |
| ONS68341 | Unassigned | Unassigned | Unassigned | 170_11  | Clustered           | 10 VC_170_11 | 10  | 0.1502 | 0.99999797 | 0.1502 | 0 | 0 | 0 | 0.9111 Ref |
| ONS71554 | Unassigned | Unassigned | Unassigned | 848_0   | Clustered           | 124 VC_848_0 | 124 | 0.9484 | 1          | 0.9484 | 0 | 0 | 0 | 1 Ref      |
| ONS71632 | Unassigned | Unassigned | Unassigned | 12_2    | Clustered           | 19 VC_12_2   | 19  | 0.2009 | 1          | 0.2009 | 0 | 0 | 0 | 1 Ref      |
| ON602723 | Unassigned | Unassigned | Unassigned | 113_0   | Clustered           | 91 VC_113_0  | 91  | 0.9584 | 1          | 0.9584 | 0 | 0 | 0 | 1 Ref      |
| ON602724 | Unassigned | Unassigned | Unassigned | 113_0   | Clustered           | 91 VC_113_0  | 91  | 0.9584 | 1          | 0.9584 | 0 | 0 | 0 | 1 Ref      |
| ON602725 | Unassigned | Unassigned | Unassigned | 113_0   | Clustered           | 91 VC_113_0  | 91  | 0.9584 | 1          | 0.9584 | 0 | 0 | 0 | 1 Ref      |
| ON602726 | Unassigned | Unassigned | Unassigned | 113_0   | Clustered           | 91 VC_113_0  | 91  | 0.9584 | 1          | 0.9584 | 0 | 0 | 0 | 1 Ref      |
| ON602727 | Unassigned | Unassigned | Unassigned | 113_0   | Clustered           | 91 VC_113_0  | 91  | 0.9584 | 1          | 0.9584 | 0 | 0 | 0 | 1 Ref      |
| ON602728 | Unassigned | Unassigned | Unassigned | 113_0   | Clustered           | 91 VC_113_0  | 91  | 0.9584 | 1          | 0.9584 | 0 | 0 | 0 | 1 Ref      |
| ON602729 | Unassigned | Unassigned | Unassigned | 601_3   | Clustered           | 12 VC_601_3  | 12  | 0.2339 | 1          | 0.2339 | 0 | 0 | 0 | 0.8636 Ref |
| ON602730 | Unassigned | Unassigned | Unassigned | 474_0   | Clustered           | 19 VC_474_0  | 19  | 0.3729 | 1          | 0.3729 | 0 | 0 | 0 | 1 Ref      |
| ON602732 | Unassigned | Unassigned | Unassigned | 113_0   | Clustered           | 91 VC_113_0  | 91  | 0.9584 | 1          | 0.9584 | 0 | 0 | 0 | 1 Ref      |
| ON602733 | Unassigned | Unassigned | Unassigned | 401_0   | Clustered           | 4 VC_401_0   | 4   | 0.0343 | 0.99998813 | 0.0343 | 0 | 0 | 0 | 1 Ref      |
| ON602734 | Unassigned | Unassigned | Unassigned | 860_0   | Clustered           | 9 VC_860_0   | 9   | 0.7723 | 1          | 0.7723 | 0 | 0 | 0 | 1 Ref      |
| ON602735 | Unassigned | Unassigned | Unassigned | 972_0   | Clustered           | 99 VC_972_0  | 99  | 0.9113 | 1          | 0.9113 | 0 | 0 | 0 | 0.9928 Ref |
| ON602736 | Unassigned | Unassigned | Unassigned | 601_3   | Clustered           | 12 VC_601_3  | 12  | 0.2339 | 1          | 0.2339 | 0 | 0 | 0 | 0.8636 Ref |
| ON602737 | Unassigned | Unassigned | Unassigned | 474_0   | Clustered           | 19 VC_474_0  | 19  | 0.3729 | 1          | 0.3729 | 0 | 0 | 0 | 1 Ref      |
| ON602738 | Unassigned | Unassigned | Unassigned | 474_0   | Clustered           | 19 VC_474_0  | 19  | 0.3729 | 1          | 0.3729 | 0 | 0 | 0 | 1 Ref      |
| ON602739 | Unassigned | Unassigned | Unassigned | 113_0   | Clustered           | 91 VC_113_0  | 91  | 0.9584 | 1          | 0.9584 | 0 | 0 | 0 | 1 Ref      |
| ON602740 | Unassigned | Unassigned | Unassigned | 113_0   | Clustered           | 91 VC_113_0  | 91  | 0.9584 | 1          | 0.9584 | 0 | 0 | 0 | 1 Ref      |
| ON602741 | Unassigned | Unassigned | Unassigned | 972_0   | Clustered           | 99 VC_972_0  | 99  | 0.9113 | 1          | 0.9113 | 0 | 0 | 0 | 0.9928 Ref |
| ON602742 | Unassigned | Unassigned | Unassigned | 848_0   | Clustered           | 124 VC_848_0 | 124 | 0.9484 | 1          | 0.9484 | 0 | 0 | 0 | 1 Ref      |
| ON602743 | Unassigned | Unassigned | Unassigned | 113_0   | Clustered           | 91 VC_113_0  | 91  | 0.9584 | 1          | 0.9584 | 0 | 0 | 0 | 1 Ref      |
| ON602744 | Unassigned | Unassigned | Unassigned | 474_0   | Clustered           | 19 VC_474_0  | 19  | 0.3729 | 1          | 0.3729 | 0 | 0 | 0 | 1 Ref      |
| ON602746 | Unassigned | Unassigned | Unassigned | 1090_0  | Clustered           | 8 VC_1090_0  | 8   | 0.6377 | 1          | 0.6377 | 0 | 0 | 0 | 1 Ref      |
| ON602747 | Unassigned | Unassigned | Unassigned | 860_0   | Clustered           | 9 VC_860_0   | 9   | 0.7723 | 1          | 0.7723 | 0 | 0 | 0 | 1 Ref      |
| ON602748 | Unassigned | Unassigned | Unassigned | 113_0   | Clustered           | 91 VC_113_0  | 91  | 0.9584 | 1          | 0.9584 | 0 | 0 | 0 | 1 Ref      |
| ON602749 | Unassigned | Unassigned | Unassigned | 801_0   | Clustered           | 37 VC_801_0  | 37  | 0.5672 | 1          | 0.5672 | 0 | 0 | 0 | 1 Ref      |
| ON602750 | Unassigned | Unassigned | Unassigned | 972_0   | Clustered           | 99 VC_972_0  | 99  | 0.9113 | 1          | 0.9113 | 0 | 0 | 0 | 0.9928 Ref |
| ON602751 | Unassigned | Unassigned | Unassigned | 801_0   | Clustered           | 37 VC_801_0  | 37  | 0.5672 | 1          | 0.5672 | 0 | 0 | 0 | 1 Ref      |
| ON602752 | Unassigned | Unassigned | Unassigned | 113_0   | Clustered           | 91 VC_113_0  | 91  | 0.9584 | 1          | 0.9584 | 0 | 0 | 0 | 1 Ref      |
| ON602753 | Unassigned | Unassigned | Unassigned | 848_0   | Clustered           | 124 VC_848_0 | 124 | 0.9484 | 1          | 0.9484 | 0 | 0 | 0 | 1 Ref      |
| ON602754 | Unassigned | Unassigned | Unassigned | 113_0   | Clustered           | 91 VC_113_0  | 91  | 0.9584 | 1          | 0.9584 | 0 | 0 | 0 | 1 Ref      |



|          |            |            |            |         |                     |              |     |        |            |        |   |   |   |            |
|----------|------------|------------|------------|---------|---------------------|--------------|-----|--------|------------|--------|---|---|---|------------|
| ON602755 | Unassigned | Unassigned | Unassigned | 848_0   | Clustered           | 124 VC_848_0 | 124 | 0.9484 | 1          | 0.9484 | 0 | 0 | 0 | 1 Ref      |
| ON602756 | Unassigned | Unassigned | Unassigned | 113_0   | Clustered           | 91 VC_113_0  | 91  | 0.9584 | 1          | 0.9584 | 0 | 0 | 0 | 1 Ref      |
| ON602757 | Unassigned | Unassigned | Unassigned | 113_0   | Clustered           | 91 VC_113_0  | 91  | 0.9584 | 1          | 0.9584 | 0 | 0 | 0 | 1 Ref      |
| ON602758 | Unassigned | Unassigned | Unassigned | 125_0   | Clustered           | 23 VC_125_0  | 23  | 0.8163 | 1          | 0.8163 | 0 | 0 | 0 | 1 Ref      |
| ON602759 | Unassigned | Unassigned | Unassigned | 474_0   | Clustered           | 19 VC_474_0  | 19  | 0.3729 | 1          | 0.3729 | 0 | 0 | 0 | 1 Ref      |
| ON602760 | Unassigned | Unassigned | Unassigned | 474_0   | Clustered           | 19 VC_474_0  | 19  | 0.3729 | 1          | 0.3729 | 0 | 0 | 0 | 1 Ref      |
| ON602761 | Unassigned | Unassigned | Unassigned | 113_0   | Clustered           | 91 VC_113_0  | 91  | 0.9584 | 1          | 0.9584 | 0 | 0 | 0 | 1 Ref      |
| ON602762 | Unassigned | Unassigned | Unassigned | 113_0   | Clustered           | 91 VC_113_0  | 91  | 0.9584 | 1          | 0.9584 | 0 | 0 | 0 | 1 Ref      |
| ON602763 | Unassigned | Unassigned | Unassigned | 466_0   | Clustered           | 66 VC_466_0  | 66  | 0.9246 | 1          | 0.9246 | 0 | 0 | 0 | 1 Ref      |
| ON602764 | Unassigned | Unassigned | Unassigned | 466_0   | Clustered           | 66 VC_466_0  | 66  | 0.9246 | 1          | 0.9246 | 0 | 0 | 0 | 1 Ref      |
| ON602765 | Unassigned | Unassigned | Unassigned | 466_0   | Clustered           | 66 VC_466_0  | 66  | 0.9246 | 1          | 0.9246 | 0 | 0 | 0 | 1 Ref      |
| ON602766 | Unassigned | Unassigned | Unassigned | 860_0   | Clustered           | 9 VC_860_0   | 9   | 0.7723 | 1          | 0.7723 | 0 | 0 | 0 | 1 Ref      |
| ON602767 | Unassigned | Unassigned | Unassigned | 113_0   | Clustered           | 91 VC_113_0  | 91  | 0.9584 | 1          | 0.9584 | 0 | 0 | 0 | 1 Ref      |
| ON630910 | Unassigned | Unassigned | Unassigned | 508_1   | Clustered           | 5 VC_508_1   | 5   | 0.0439 | 0.99999996 | 0.0439 | 0 | 0 | 0 | 1 Ref      |
| ON631220 | Unassigned | Unassigned | Unassigned | 356_0   | Clustered           | 21 VC_356_0  | 21  | 0.5409 | 1          | 0.5409 | 0 | 0 | 0 | 1 Ref      |
| ON637170 | Unassigned | Unassigned | Unassigned | 200_0   | Clustered           | 15 VC_200_0  | 15  | 0.5004 | 1          | 0.5004 | 0 | 0 | 0 | 1 Ref      |
| ON637248 | Unassigned | Unassigned | Unassigned | 99_0    | Clustered           | 5 VC_99_0    | 5   | 0.0694 | 0.98113835 | 0.0681 | 0 | 0 | 0 | 1 Ref      |
| ON637250 | Unassigned | Unassigned | Unassigned | 465_0   | Clustered           | 80 VC_465_0  | 80  | 0.9988 | 1          | 0.9988 | 0 | 0 | 0 | 1 Ref      |
| ON637251 | Unassigned | Unassigned | Unassigned | 475_0   | Clustered           | 96 VC_475_0  | 96  | 0.9303 | 1          | 0.9303 | 0 | 0 | 0 | 0.9575 Ref |
| ON637759 | Unassigned | Unassigned | Unassigned | 783_0   | Clustered           | 67 VC_783_0  | 67  | 0.8945 | 1          | 0.8945 | 0 | 0 | 0 | 1 Ref      |
| ON637760 | Unassigned | Unassigned | Unassigned | 537_0   | Clustered           | 39 VC_537_0  | 39  | 0.8148 | 1          | 0.8148 | 0 | 0 | 0 | 1 Ref      |
| ON637761 | Unassigned | Unassigned | Unassigned | 1136_0  | Clustered           | 40 VC_1136_0 | 40  | 0.8746 | 1          | 0.8746 | 0 | 0 | 0 | 1 Ref      |
| ON637762 | Unassigned | Unassigned | Unassigned | 989_0   | Clustered           | 13 VC_989_0  | 13  | 0.8622 | 1          | 0.8622 | 0 | 0 | 0 | 1 Ref      |
| ON637763 | Unassigned | Unassigned | Unassigned | 989_0   | Clustered           | 13 VC_989_0  | 13  | 0.8622 | 1          | 0.8622 | 0 | 0 | 0 | 1 Ref      |
| ON637764 | Unassigned | Unassigned | Unassigned | 579_19  | Clustered/Singleton | 1 VC_579_19  | 1   | 0      | 1          | 0      | 0 | 0 | 0 | 1 Ref      |
| ON637765 | Unassigned | Unassigned | Unassigned | 783_0   | Clustered           | 67 VC_783_0  | 67  | 0.8945 | 1          | 0.8945 | 0 | 0 | 0 | 1 Ref      |
| ON637766 | Unassigned | Unassigned | Unassigned | 783_0   | Clustered           | 67 VC_783_0  | 67  | 0.8945 | 1          | 0.8945 | 0 | 0 | 0 | 1 Ref      |
| ON637767 | Unassigned | Unassigned | Unassigned | 1406_0  | Clustered           | 21 VC_1406_0 | 21  | 0.9836 | 1          | 0.9836 | 0 | 0 | 0 | 1 Ref      |
| ON637768 | Unassigned | Unassigned | Unassigned | 579_14  | Clustered           | 8 VC_579_14  | 8   | 0.0227 | 0.99904117 | 0.0227 | 0 | 0 | 0 | 0.8214 Ref |
| ON637769 | Unassigned | Unassigned | Unassigned | 384_11  | Clustered           | 31 VC_384_11 | 31  | 0.0926 | 1          | 0.0926 | 0 | 0 | 0 | 0.7011 Ref |
| ON637770 | Unassigned | Unassigned | Unassigned | 1143_1  | Clustered           | 2 VC_1143_1  | 2   | 0.1203 | 0.94673154 | 0.1138 | 0 | 0 | 0 | 1 Ref      |
| ON637771 | Unassigned | Unassigned | Unassigned | 535_1   | Clustered           | 108 VC_535_1 | 108 | 0.8479 | 1          | 0.8479 | 0 | 0 | 0 | 0.9955 Ref |
| ON637772 | Unassigned | Unassigned | Unassigned | 973_0   | Clustered           | 15 VC_973_0  | 15  | 1      | 0          | 0      | 0 | 0 | 0 | 1 Ref      |
| ON642070 | Unassigned | Unassigned | Unassigned | 1_0     | Clustered           | 54 VC_1_0    | 54  | 0.8518 | 1          | 0.8518 | 0 | 0 | 0 | 1 Ref      |
| ON645337 | Unassigned | Unassigned | Unassigned | 783_0   | Clustered           | 67 VC_783_0  | 67  | 0.8945 | 1          | 0.8945 | 0 | 0 | 0 | 1 Ref      |
| ON645338 | Unassigned | Unassigned | Unassigned | 1204_0  | Clustered           | 25 VC_1204_0 | 25  | 0.7382 | 1          | 0.7382 | 0 | 0 | 0 | 1 Ref      |
| ON645339 | Unassigned | Unassigned | Unassigned | 1115_5  | Clustered           | 3 VC_1115_5  | 3   | 0.0473 | 0.98997321 | 0.0468 | 0 | 0 | 0 | 1 Ref      |
| ON645341 | Unassigned | Unassigned | Unassigned | 1407_0  | Clustered           | 78 VC_1407_0 | 78  | 0.9731 | 1          | 0.9731 | 0 | 0 | 0 | 1 Ref      |
| ON645342 | Unassigned | Unassigned | Unassigned | 241_0   | Clustered           | 21 VC_241_0  | 21  | 0.8342 | 1          | 0.8342 | 0 | 0 | 0 | 1 Ref      |
| ON645343 | Unassigned | Unassigned | Unassigned | 1216_0  | Clustered           | 22 VC_1216_0 | 22  | 0.4546 | 1          | 0.4546 | 0 | 0 | 0 | 1 Ref      |
| ON645344 | Unassigned | Unassigned | Unassigned | 540_0   | Clustered           | 3 VC_540_0   | 3   | 0.083  | 0.9985266  | 0.0829 | 0 | 0 | 0 | 1 Ref      |
| ON645345 | Unassigned | Unassigned | Unassigned | 1407_0  | Clustered           | 78 VC_1407_0 | 78  | 0.9731 | 1          | 0.9731 | 0 | 0 | 0 | 1 Ref      |
| ON645346 | Unassigned | Unassigned | Unassigned | 1073_0  | Clustered           | 2 VC_1073_0  | 2   | 0.0707 | 0.95326364 | 0.0674 | 0 | 0 | 0 | 1 Ref      |
| ON645936 | Unassigned | Unassigned | Unassigned | 290_178 | Clustered/Singleton | 1 VC_290_178 | 1   | 0      | 1          | 0      | 0 | 0 | 0 | 1 Ref      |
| ON653033 | Unassigned | Unassigned | Unassigned | 78_0    | Clustered           | 20 VC_78_0   | 20  | 0.9639 | 1          | 0.9639 | 0 | 0 | 0 | 1 Ref      |
| ON677304 | Unassigned | Unassigned | Unassigned | 335_48  | Clustered/Singleton | 1 VC_335_48  | 1   | 0      | 1          | 0      | 0 | 0 | 0 | 1 Ref      |
| ON677538 | Unassigned | Unassigned | Unassigned | 800_0   | Clustered           | 4 VC_800_0   | 4   | 0.8098 | 0.99985435 | 0.8096 | 0 | 0 | 0 | 1 Ref      |
| ON687735 | Unassigned | Unassigned | Unassigned | 243_0   | Clustered           | 72 VC_243_0  | 72  | 0.8089 | 1          | 0.8089 | 0 | 0 | 0 | 1 Ref      |
| ON687736 | Unassigned | Unassigned | Unassigned | 243_0   | Clustered           | 72 VC_243_0  | 72  | 0.8089 | 1          | 0.8089 | 0 | 0 | 0 | 1 Ref      |
| ON699007 | Unassigned | Unassigned | Unassigned | 144_0   | Clustered           | 2 VC_144_0   | 2   | 0.1118 | 0.95020171 | 0.1062 | 0 | 0 | 0 | 1 Ref      |
| ON706965 | Unassigned | Unassigned | Unassigned | 339_0   | Clustered           | 11 VC_339_0  | 11  | 0.4647 | 1          | 0.4647 | 0 | 0 | 0 | 1 Ref      |
| ON711395 | Unassigned | Unassigned | Unassigned | 976_0   | Clustered           | 36 VC_976_0  | 36  | 0.7833 | 1          | 0.7833 | 0 | 0 | 0 | 1 Ref      |
| ON711490 | Unassigned | Unassigned | Unassigned | 323_0   | Clustered           | 3 VC_323_0   | 3   | 0.7468 | 0.99821656 | 0.7454 | 0 | 0 | 0 | 1 Ref      |
| ON712643 | Unassigned | Unassigned | Unassigned | 873_7   | Clustered/Singleton | 1 VC_873_7   | 1   | 0      | 1          | 0      | 0 | 0 | 0 | 1 Ref      |
| ON714422 | Unassigned | Unassigned | Unassigned | 661_2   | Clustered           | 6 VC_661_2   | 6   | 0.1674 | 1          | 0.1674 | 0 | 0 | 0 | 1 Ref      |
| ON715521 | Unassigned | Unassigned | Unassigned | 400_0   | Clustered           | 3 VC_400_0   | 3   | 0.0419 | 0.99861633 | 0.0418 | 0 | 0 | 0 | 1 Ref      |
| ON720975 | Unassigned | Unassigned | Unassigned | 290_162 | Clustered/Singleton | 1 VC_290_162 | 1   | 0      | 1          | 0      | 0 | 0 | 0 | 1 Ref      |
| ON720976 | Unassigned | Unassigned | Unassigned | 560_0   | Clustered           | 15 VC_560_0  | 15  | 0.2846 | 1          | 0.2846 | 0 | 0 | 0 | 1 Ref      |
| ON720977 | Unassigned | Unassigned | Unassigned | 654_0   | Clustered           | 115 VC_654_0 | 115 | 0.7303 | 1          | 0.7303 | 0 | 0 | 0 | 0.8764 Ref |
| ON724008 | Unassigned | Unassigned | Unassigned | 1217_0  | Clustered           | 41 VC_1217_0 | 41  | 0.9546 | 1          | 0.9546 | 0 | 0 | 0 | 0.9976 Ref |
| ON724009 | Unassigned | Unassigned | Unassigned | 1226_0  | Clustered           | 5 VC_1226_0  | 5   | 0.6594 | 0.99999982 | 0.6594 | 0 | 0 | 0 | 1 Ref      |
| ON724011 | Unassigned | Unassigned | Unassigned | 1217_0  | Clustered           | 41 VC_1217_0 | 41  | 0.9546 | 1          | 0.9546 | 0 | 0 | 0 | 0.9976 Ref |
| ON724012 | Unassigned | Unassigned | Unassigned | 1217_0  | Clustered           | 41 VC_1217_0 | 41  | 0.9546 | 1          | 0.9546 | 0 | 0 | 0 | 0.9976 Ref |
| ON724013 | Unassigned | Unassigned | Unassigned | 243_0   | Clustered           | 72 VC_243_0  | 72  | 0.8089 | 1          | 0.8089 | 0 | 0 | 0 | 1 Ref      |
| ON724014 | Unassigned | Unassigned | Unassigned | 1136_0  | Clustered           | 40 VC_1136_0 | 40  | 0.8746 | 1          | 0.8746 | 0 | 0 | 0 | 1 Ref      |
| ON724015 | Unassigned | Unassigned | Unassigned | 893_1   | Clustered           | 20 VC_893_1  | 20  | 0.4792 | 1          | 0.4792 | 0 | 0 | 0 | 1 Ref      |
| ON724016 | Unassigned | Unassigned | Unassigned | 232_0   | Clustered           | 32 VC_232_0  | 32  | 0.8471 | 1          | 0.8471 | 0 | 0 | 0 | 0.996 Ref  |
| ON724017 | Unassigned | Unassigned | Unassigned | 1075_0  | Clustered           | 11 VC_1075_0 | 11  | 0.6562 | 1          | 0.6562 | 0 | 0 | 0 | 0.9273 Ref |
| ON724018 | Unassigned | Unassigned | Unassigned | 1287_0  | Clustered           | 44 VC_1287_0 | 44  | 1      | 1          | 1      | 0 | 0 | 0 | 1 Ref      |
| ON754979 | Unassigned | Unassigned | Unassigned | 399_0   | Clustered           | 49 VC_399_0  | 49  | 0.7927 | 1          | 0.7927 | 0 | 0 | 0 | 1 Ref      |
| ON755181 | Unassigned | Unassigned | Unassigned | 918_0   | Clustered           | 16 VC_918_0  | 16  | 0.2945 | 1          | 0.2945 | 0 | 0 | 0 | 1 Ref      |
| ON755182 | Unassigned | Unassigned | Unassigned | 1407_0  | Clustered           | 78 VC_1407_0 | 78  | 0.9731 | 1          | 0.9731 | 0 | 0 | 0 | 1 Ref      |
| ON755183 | Unassigned | Unassigned | Unassigned | 1406_0  | Clustered           | 21 VC_1406_0 | 21  | 0.9836 | 1          | 0.9836 | 0 | 0 | 0 | 1 Ref      |
| ON755184 | Unassigned | Unassigned | Unassigned | 1139_0  | Clustered           | 5 VC_1139_0  | 5   | 0.8556 | 0.99869977 | 0.8545 | 0 | 0 | 0 | 1 Ref      |
| ON755185 | Unassigned | Unassigned | Unassigned | 592_0   | Clustered           | 16 VC_592_0  | 16  | 0.7259 | 1          | 0.7259 | 0 | 0 | 0 | 1 Ref      |
| ON755186 | Unassigned | Unassigned | Unassigned | 1138_0  | Clustered           | 16 VC_1138_0 | 16  | 0.4566 | 1          | 0.4566 | 0 | 0 | 0 | 1 Ref      |
| ON755187 | Unassigned | Unassigned | Unassigned | 592_0   | Clustered           | 16 VC_592_0  | 16  | 0.7259 | 1          | 0.7259 | 0 | 0 | 0 | 1 Ref      |
| ON755188 | Unassigned | Unassigned | Unassigned | 1407_0  | Clustered           | 78 VC_1407_0 | 78  | 0.9731 | 1          | 0.9731 | 0 | 0 | 0 | 1 Ref      |
| ON755189 | Unassigned | Unassigned | Unassigned | 579_16  | Clustered/Singleton | 1 VC_579_16  | 1   | 0      | 1          | 0      | 0 | 0 | 0 | 1 Ref      |
| ON758385 | Unassigned | Unassigned | Unassigned | 524_1   | Clustered/Singleton | 1 VC_524_1   | 1   | 0      | 1          | 0      | 0 | 0 | 0 | 1 Ref      |
| ON778007 | Unassigned | Unassigned | Unassigned | 304_0   | Clustered           | 5 VC_304_0   | 5   | 0.1053 | 0.99999993 | 0.1053 | 0 | 0 | 0 | 0.9 Ref    |



|          |            |            |            |        |                     |              |     |        |            |        |   |   |   |            |
|----------|------------|------------|------------|--------|---------------------|--------------|-----|--------|------------|--------|---|---|---|------------|
| ON778463 | Unassigned | Unassigned | Unassigned | 816_0  | Clustered           | 35 VC_816_0  | 35  | 0.9824 | 1          | 0.9824 | 0 | 0 | 0 | 1 Ref      |
| ON782130 | Unassigned | Unassigned | Unassigned | 235_0  | Clustered           | 60 VC_235_0  | 60  | 0.9413 | 1          | 0.9413 | 0 | 0 | 0 | 1 Ref      |
| ON782582 | Unassigned | Unassigned | Unassigned | 290_6  | Clustered/Singleton | 1 VC_290_6   | 1   | 0      | 1          | 0      | 0 | 0 | 0 | 1 Ref      |
| ON807605 | Unassigned | Unassigned | Unassigned | 125_0  | Clustered           | 23 VC_125_0  | 23  | 0.8163 | 1          | 0.8163 | 0 | 0 | 0 | 1 Ref      |
| ON809559 | Unassigned | Unassigned | Unassigned | 113_0  | Clustered           | 91 VC_113_0  | 91  | 0.9584 | 1          | 0.9584 | 0 | 0 | 0 | 1 Ref      |
| ON809560 | Unassigned | Unassigned | Unassigned | 125_0  | Clustered           | 23 VC_125_0  | 23  | 0.8163 | 1          | 0.8163 | 0 | 0 | 0 | 1 Ref      |
| ON814134 | Unassigned | Unassigned | Unassigned | 159_0  | Clustered           | 25 VC_159_0  | 25  | 0.7699 | 1          | 0.7699 | 0 | 0 | 0 | 1 Ref      |
| ON814135 | Unassigned | Unassigned | Unassigned | 159_0  | Clustered           | 25 VC_159_0  | 25  | 0.7699 | 1          | 0.7699 | 0 | 0 | 0 | 1 Ref      |
| ON814136 | Unassigned | Unassigned | Unassigned | 159_0  | Clustered           | 25 VC_159_0  | 25  | 0.7699 | 1          | 0.7699 | 0 | 0 | 0 | 1 Ref      |
| ON815901 | Unassigned | Unassigned | Unassigned | 862_0  | Clustered           | 29 VC_862_0  | 29  | 0.8594 | 1          | 0.8594 | 0 | 0 | 0 | 1 Ref      |
| ON815902 | Unassigned | Unassigned | Unassigned | 862_0  | Clustered           | 29 VC_862_0  | 29  | 0.8594 | 1          | 0.8594 | 0 | 0 | 0 | 1 Ref      |
| ON815903 | Unassigned | Unassigned | Unassigned | 862_0  | Clustered           | 29 VC_862_0  | 29  | 0.8594 | 1          | 0.8594 | 0 | 0 | 0 | 1 Ref      |
| ON843697 | Unassigned | Unassigned | Unassigned | 603_0  | Clustered           | 28 VC_603_0  | 28  | 0.7692 | 1          | 0.7692 | 0 | 0 | 0 | 1 Ref      |
| ON853583 | Unassigned | Unassigned | Unassigned | 127_0  | Clustered           | 17 VC_127_0  | 17  | 0.9222 | 1          | 0.9222 | 0 | 0 | 0 | 1 Ref      |
| ON856257 | Unassigned | Unassigned | Unassigned | 8_0    | Clustered           | 58 VC_8_0    | 58  | 0.8285 | 1          | 0.8285 | 0 | 0 | 0 | 0.9946 Ref |
| ON856258 | Unassigned | Unassigned | Unassigned | 8_0    | Clustered           | 58 VC_8_0    | 58  | 0.8285 | 1          | 0.8285 | 0 | 0 | 0 | 0.9946 Ref |
| ON857925 | Unassigned | Unassigned | Unassigned | 80_7   | Clustered           | 33 VC_80_7   | 33  | 0.2156 | 1          | 0.2156 | 0 | 0 | 0 | 0.8409 Ref |
| ON857926 | Unassigned | Unassigned | Unassigned | 434_0  | Clustered           | 45 VC_434_0  | 45  | 0.9479 | 1          | 0.9479 | 0 | 0 | 0 | 1 Ref      |
| ON857927 | Unassigned | Unassigned | Unassigned | 486_0  | Clustered           | 47 VC_486_0  | 47  | 0.9022 | 1          | 0.9022 | 0 | 0 | 0 | 1 Ref      |
| ON857928 | Unassigned | Unassigned | Unassigned | 434_0  | Clustered           | 45 VC_434_0  | 45  | 0.9479 | 1          | 0.9479 | 0 | 0 | 0 | 1 Ref      |
| ON857929 | Unassigned | Unassigned | Unassigned | 80_7   | Clustered           | 33 VC_80_7   | 33  | 0.2156 | 1          | 0.2156 | 0 | 0 | 0 | 0.8409 Ref |
| ON857930 | Unassigned | Unassigned | Unassigned | 80_0   | Clustered           | 64 VC_80_0   | 64  | 0.418  | 1          | 0.418  | 0 | 0 | 0 | 0.7649 Ref |
| ON857931 | Unassigned | Unassigned | Unassigned | 302_0  | Clustered           | 2 VC_302_0   | 2   | 0.0332 | 0.94488015 | 0.0313 | 0 | 0 | 0 | 1 Ref      |
| ON857932 | Unassigned | Unassigned | Unassigned | 772_0  | Clustered           | 9 VC_772_0   | 9   | 0.4468 | 1          | 0.4468 | 0 | 0 | 0 | 1 Ref      |
| ON857933 | Unassigned | Unassigned | Unassigned | 434_0  | Clustered           | 45 VC_434_0  | 45  | 0.9479 | 1          | 0.9479 | 0 | 0 | 0 | 1 Ref      |
| ON857934 | Unassigned | Unassigned | Unassigned | 80_0   | Clustered           | 64 VC_80_0   | 64  | 0.418  | 1          | 0.418  | 0 | 0 | 0 | 0.7649 Ref |
| ON857935 | Unassigned | Unassigned | Unassigned | 434_0  | Clustered           | 45 VC_434_0  | 45  | 0.9479 | 1          | 0.9479 | 0 | 0 | 0 | 1 Ref      |
| ON857936 | Unassigned | Unassigned | Unassigned | 486_0  | Clustered           | 47 VC_486_0  | 47  | 0.9022 | 1          | 0.9022 | 0 | 0 | 0 | 1 Ref      |
| ON857937 | Unassigned | Unassigned | Unassigned | 80_7   | Clustered           | 33 VC_80_7   | 33  | 0.2156 | 1          | 0.2156 | 0 | 0 | 0 | 0.8409 Ref |
| ON857938 | Unassigned | Unassigned | Unassigned | 80_7   | Clustered           | 33 VC_80_7   | 33  | 0.2156 | 1          | 0.2156 | 0 | 0 | 0 | 0.8409 Ref |
| ON857939 | Unassigned | Unassigned | Unassigned | 1068_0 | Clustered           | 8 VC_1068_0  | 8   | 0.9291 | 1          | 0.9291 | 0 | 0 | 0 | 1 Ref      |
| ON857940 | Unassigned | Unassigned | Unassigned | 182_1  | Clustered           | 2 VC_182_1   | 2   | 0.0361 | 0.95657568 | 0.0345 | 0 | 0 | 0 | 1 Ref      |
| ON857941 | Unassigned | Unassigned | Unassigned | 632_0  | Clustered           | 9 VC_632_0   | 9   | 0.9524 | 1          | 0.9524 | 0 | 0 | 0 | 1 Ref      |
| ON857942 | Unassigned | Unassigned | Unassigned | 80_0   | Clustered           | 64 VC_80_0   | 64  | 0.418  | 1          | 0.418  | 0 | 0 | 0 | 0.7649 Ref |
| ON857943 | Unassigned | Unassigned | Unassigned | 862_0  | Clustered           | 29 VC_862_0  | 29  | 0.8594 | 1          | 0.8594 | 0 | 0 | 0 | 1 Ref      |
| ON862890 | Unassigned | Unassigned | Unassigned | 133_1  | Clustered           | 6 VC_133_1   | 6   | 0.0566 | 0.99999999 | 0.0566 | 0 | 0 | 0 | 1 Ref      |
| ON864052 | Unassigned | Unassigned | Unassigned | 861_0  | Clustered           | 29 VC_861_0  | 29  | 0.9954 | 1          | 0.9954 | 0 | 0 | 0 | 1 Ref      |
| ON866946 | Unassigned | Unassigned | Unassigned | 159_0  | Clustered           | 25 VC_159_0  | 25  | 0.7699 | 1          | 0.7699 | 0 | 0 | 0 | 1 Ref      |
| ON868915 | Unassigned | Unassigned | Unassigned | 340_19 | Clustered/Singleton | 1 VC_340_19  | 1   | 0      | 1          | 0      | 0 | 0 | 0 | 1 Ref      |
| ON872379 | Unassigned | Unassigned | Unassigned | 861_0  | Clustered           | 29 VC_861_0  | 29  | 0.9954 | 1          | 0.9954 | 0 | 0 | 0 | 1 Ref      |
| ON880501 | Unassigned | Unassigned | Unassigned | 848_0  | Clustered           | 124 VC_848_0 | 124 | 0.9484 | 1          | 0.9484 | 0 | 0 | 0 | 1 Ref      |
| ON881243 | Unassigned | Unassigned | Unassigned | 489_3  | Clustered/Singleton | 1 VC_489_3   | 1   | 0      | 1          | 0      | 0 | 0 | 0 | 1 Ref      |
| ON881905 | Unassigned | Unassigned | Unassigned | 972_0  | Clustered           | 99 VC_972_0  | 99  | 0.9113 | 1          | 0.9113 | 0 | 0 | 0 | 0.9928 Ref |
| ON911538 | Unassigned | Unassigned | Unassigned | 766_0  | Clustered           | 40 VC_766_0  | 40  | 0.7511 | 1          | 0.7511 | 0 | 0 | 0 | 1 Ref      |
| ON911539 | Unassigned | Unassigned | Unassigned | 75_0   | Clustered           | 15 VC_75_0   | 15  | 0.518  | 1          | 0.518  | 0 | 0 | 0 | 1 Ref      |
| ON911540 | Unassigned | Unassigned | Unassigned | 479_0  | Clustered           | 7 VC_479_0   | 7   | 0.3294 | 1          | 0.3294 | 0 | 0 | 0 | 1 Ref      |
| ON911714 | Unassigned | Unassigned | Unassigned | 9_0    | Clustered           | 38 VC_9_0    | 38  | 0.4859 | 1          | 0.4859 | 0 | 0 | 0 | 1 Ref      |
| ON911715 | Unassigned | Unassigned | Unassigned | 9_0    | Clustered           | 38 VC_9_0    | 38  | 0.4859 | 1          | 0.4859 | 0 | 0 | 0 | 1 Ref      |
| ON911716 | Unassigned | Unassigned | Unassigned | 9_0    | Clustered           | 38 VC_9_0    | 38  | 0.4859 | 1          | 0.4859 | 0 | 0 | 0 | 1 Ref      |
| ON911717 | Unassigned | Unassigned | Unassigned | 9_0    | Clustered           | 38 VC_9_0    | 38  | 0.4859 | 1          | 0.4859 | 0 | 0 | 0 | 1 Ref      |
| ON911718 | Unassigned | Unassigned | Unassigned | 9_0    | Clustered           | 38 VC_9_0    | 38  | 0.4859 | 1          | 0.4859 | 0 | 0 | 0 | 1 Ref      |
| ON920540 | Unassigned | Unassigned | Unassigned | 1435_0 | Clustered           | 2 VC_1435_0  | 2   | 0.7818 | 0.9262493  | 0.7242 | 0 | 0 | 0 | 1 Ref      |
| ON922917 | Unassigned | Unassigned | Unassigned | 947_0  | Clustered           | 4 VC_947_0   | 4   | 0.8344 | 0.99992411 | 0.8343 | 0 | 0 | 0 | 1 Ref      |
| ON922918 | Unassigned | Unassigned | Unassigned | 737_0  | Clustered           | 13 VC_737_0  | 13  | 0.5083 | 1          | 0.5083 | 0 | 0 | 0 | 1 Ref      |
| ON922919 | Unassigned | Unassigned | Unassigned | 801_0  | Clustered           | 37 VC_801_0  | 37  | 0.5672 | 1          | 0.5672 | 0 | 0 | 0 | 1 Ref      |
| ON922920 | Unassigned | Unassigned | Unassigned | 399_0  | Clustered           | 49 VC_399_0  | 49  | 0.7927 | 1          | 0.7927 | 0 | 0 | 0 | 1 Ref      |
| ON922990 | Unassigned | Unassigned | Unassigned | 511_9  | Clustered/Singleton | 1 VC_511_9   | 1   | 0      | 1          | 0      | 0 | 0 | 0 | 1 Ref      |
| ON932078 | Unassigned | Unassigned | Unassigned | 75_0   | Clustered           | 15 VC_75_0   | 15  | 0.518  | 1          | 0.518  | 0 | 0 | 0 | 1 Ref      |
| ON932079 | Unassigned | Unassigned | Unassigned | 175_0  | Clustered           | 20 VC_175_0  | 20  | 0.7504 | 1          | 0.7504 | 0 | 0 | 0 | 1 Ref      |
| ON932080 | Unassigned | Unassigned | Unassigned | 175_0  | Clustered           | 20 VC_175_0  | 20  | 0.7504 | 1          | 0.7504 | 0 | 0 | 0 | 1 Ref      |
| ON932081 | Unassigned | Unassigned | Unassigned | 75_0   | Clustered           | 15 VC_75_0   | 15  | 0.518  | 1          | 0.518  | 0 | 0 | 0 | 1 Ref      |
| ON932082 | Unassigned | Unassigned | Unassigned | 766_0  | Clustered           | 40 VC_766_0  | 40  | 0.7511 | 1          | 0.7511 | 0 | 0 | 0 | 1 Ref      |
| ON932083 | Unassigned | Unassigned | Unassigned | 75_0   | Clustered           | 15 VC_75_0   | 15  | 0.518  | 1          | 0.518  | 0 | 0 | 0 | 1 Ref      |
| ON932084 | Unassigned | Unassigned | Unassigned | 175_0  | Clustered           | 20 VC_175_0  | 20  | 0.7504 | 1          | 0.7504 | 0 | 0 | 0 | 1 Ref      |
| ON932085 | Unassigned | Unassigned | Unassigned | 766_0  | Clustered           | 40 VC_766_0  | 40  | 0.7511 | 1          | 0.7511 | 0 | 0 | 0 | 1 Ref      |
| ON933637 | Unassigned | Unassigned | Unassigned | 947_0  | Clustered           | 4 VC_947_0   | 4   | 0.8344 | 0.99992411 | 0.8343 | 0 | 0 | 0 | 1 Ref      |
| ON950090 | Unassigned | Unassigned | Unassigned | 398_0  | Clustered           | 51 VC_398_0  | 51  | 0.8741 | 1          | 0.8741 | 0 | 0 | 0 | 1 Ref      |
| ON960072 | Unassigned | Unassigned | Unassigned | 75_0   | Clustered           | 15 VC_75_0   | 15  | 0.518  | 1          | 0.518  | 0 | 0 | 0 | 1 Ref      |
| ON970561 | Unassigned | Unassigned | Unassigned | 1074_0 | Clustered           | 6 VC_1074_0  | 6   | 0.4836 | 1          | 0.4836 | 0 | 0 | 0 | 1 Ref      |
| ON970562 | Unassigned | Unassigned | Unassigned | 538_43 | Clustered           | 3 VC_538_43  | 3   | 0.0193 | 0.99837043 | 0.0192 | 0 | 0 | 0 | 1 Ref      |
| ON970563 | Unassigned | Unassigned | Unassigned | 1415_0 | Clustered           | 31 VC_1415_0 | 31  | 0.8456 | 1          | 0.8456 | 0 | 0 | 0 | 1 Ref      |
| ON970564 | Unassigned | Unassigned | Unassigned | 1206_0 | Clustered           | 3 VC_1206_0  | 3   | 0.0882 | 0.99850608 | 0.088  | 0 | 0 | 0 | 1 Ref      |
| ON970565 | Unassigned | Unassigned | Unassigned | 535_1  | Clustered           | 108 VC_535_1 | 108 | 0.8479 | 1          | 0.8479 | 0 | 0 | 0 | 0.9955 Ref |
| ON970566 | Unassigned | Unassigned | Unassigned | 538_62 | Clustered/Singleton | 1 VC_538_62  | 1   | 0      | 1          | 0      | 0 | 0 | 0 | 1 Ref      |
| ON970567 | Unassigned | Unassigned | Unassigned | 1217_0 | Clustered           | 41 VC_1217_0 | 41  | 0.9546 | 1          | 0.9546 | 0 | 0 | 0 | 0.9976 Ref |
| ON970568 | Unassigned | Unassigned | Unassigned | 1249_0 | Clustered           | 8 VC_1249_0  | 8   | 0.191  | 1          | 0.191  | 0 | 0 | 0 | 1 Ref      |
| ON970569 | Unassigned | Unassigned | Unassigned | 1278_0 | Clustered           | 19 VC_1278_0 | 19  | 1      | 1          | 1      | 0 | 0 | 0 | 1 Ref      |
| ON970571 | Unassigned | Unassigned | Unassigned | 1203_0 | Clustered           | 28 VC_1203_0 | 28  | 0.4905 | 1          | 0.4905 | 0 | 0 | 0 | 1 Ref      |
| ON970572 | Unassigned | Unassigned | Unassigned | 898_1  | Clustered           | 27 VC_898_1  | 27  | 0.8894 | 1          | 0.8894 | 0 | 0 | 0 | 1 Ref      |
| ON970573 | Unassigned | Unassigned | Unassigned | 1407_0 | Clustered           | 78 VC_1407_0 | 78  | 0.9731 | 1          | 0.9731 | 0 | 0 | 0 | 1 Ref      |
| ON970574 | Unassigned | Unassigned | Unassigned | 537_0  | Clustered           | 39 VC_537_0  | 39  | 0.8148 | 1          | 0.8148 | 0 | 0 | 0 | 1 Ref      |



|          |            |            |            |        |                     |              |     |        |            |        |   |   |   |            |
|----------|------------|------------|------------|--------|---------------------|--------------|-----|--------|------------|--------|---|---|---|------------|
| ON970575 | Unassigned | Unassigned | Unassigned | 385_0  | Clustered           | 24 VC_385_0  | 24  | 0.5516 | 1          | 0.5516 | 0 | 0 | 0 | 1 Ref      |
| ON970576 | Unassigned | Unassigned | Unassigned | 952_0  | Clustered           | 39 VC_952_0  | 39  | 0.9064 | 1          | 0.9064 | 0 | 0 | 0 | 1 Ref      |
| ON970577 | Unassigned | Unassigned | Unassigned | 384_9  | Clustered           | 4 VC_384_9   | 4   | 0.0109 | 0.99997666 | 0.0109 | 0 | 0 | 0 | 0.6667 Ref |
| ON970578 | Unassigned | Unassigned | Unassigned | 990_0  | Clustered           | 3 VC_990_0   | 3   | 0.7715 | 0.99134622 | 0.7648 | 0 | 0 | 0 | 1 Ref      |
| ON970579 | Unassigned | Unassigned | Unassigned | 1114_0 | Clustered           | 20 VC_1114_0 | 20  | 0.3238 | 1          | 0.3238 | 0 | 0 | 0 | 0.9842 Ref |
| ON970580 | Unassigned | Unassigned | Unassigned | 985_0  | Clustered           | 38 VC_985_0  | 38  | 0.9334 | 1          | 0.9334 | 0 | 0 | 0 | 1 Ref      |
| ON970581 | Unassigned | Unassigned | Unassigned | 1296_0 | Clustered           | 82 VC_1296_0 | 82  | 0.7938 | 1          | 0.7938 | 0 | 0 | 0 | 1 Ref      |
| ON970582 | Unassigned | Unassigned | Unassigned | 893_1  | Clustered           | 20 VC_893_1  | 20  | 0.4792 | 1          | 0.4792 | 0 | 0 | 0 | 1 Ref      |
| ON970583 | Unassigned | Unassigned | Unassigned | 1202_0 | Clustered           | 10 VC_1202_0 | 10  | 0.5679 | 1          | 0.5679 | 0 | 0 | 0 | 1 Ref      |
| ON970584 | Unassigned | Unassigned | Unassigned | 1424_0 | Clustered           | 31 VC_1424_0 | 31  | 0.8834 | 1          | 0.8834 | 0 | 0 | 0 | 1 Ref      |
| ON970585 | Unassigned | Unassigned | Unassigned | 538_84 | Clustered/Singleton | 1 VC_538_84  | 1   | 0      | 1          | 0      | 0 | 0 | 0 | 1 Ref      |
| ON970586 | Unassigned | Unassigned | Unassigned | 335_0  | Clustered           | 2 VC_335_0   | 2   | 0.0041 | 0.95574439 | 0.0039 | 0 | 0 | 0 | 1 Ref      |
| ON970587 | Unassigned | Unassigned | Unassigned | 526_0  | Clustered           | 32 VC_526_0  | 32  | 0.9037 | 1          | 0.9037 | 0 | 0 | 0 | 1 Ref      |
| ON970588 | Unassigned | Unassigned | Unassigned | 893_1  | Clustered           | 20 VC_893_1  | 20  | 0.4792 | 1          | 0.4792 | 0 | 0 | 0 | 1 Ref      |
| ON970589 | Unassigned | Unassigned | Unassigned | 1407_0 | Clustered           | 78 VC_1407_0 | 78  | 0.9731 | 1          | 0.9731 | 0 | 0 | 0 | 1 Ref      |
| ON970590 | Unassigned | Unassigned | Unassigned | 1114_0 | Clustered           | 20 VC_1114_0 | 20  | 0.3238 | 1          | 0.3238 | 0 | 0 | 0 | 0.9842 Ref |
| ON970591 | Unassigned | Unassigned | Unassigned | 1114_2 | Clustered           | 5 VC_1114_2  | 5   | 0.0531 | 0.99997362 | 0.0531 | 0 | 0 | 0 | 0.9 Ref    |
| ON970592 | Unassigned | Unassigned | Unassigned | 1413_0 | Clustered           | 2 VC_1413_0  | 2   | 0.1621 | 0.95304852 | 0.1545 | 0 | 0 | 0 | 1 Ref      |
| ON970593 | Unassigned | Unassigned | Unassigned | 526_0  | Clustered           | 32 VC_526_0  | 32  | 0.9037 | 1          | 0.9037 | 0 | 0 | 0 | 1 Ref      |
| ON970594 | Unassigned | Unassigned | Unassigned | 384_7  | Clustered/Singleton | 1 VC_384_7   | 1   | 0      | 1          | 0      | 0 | 0 | 0 | 1 Ref      |
| ON970595 | Unassigned | Unassigned | Unassigned | 538_58 | Clustered           | 3 VC_538_58  | 3   | 0.0208 | 0.9985993  | 0.0208 | 0 | 0 | 0 | 1 Ref      |
| ON970596 | Unassigned | Unassigned | Unassigned | 893_1  | Clustered           | 20 VC_893_1  | 20  | 0.4792 | 1          | 0.4792 | 0 | 0 | 0 | 1 Ref      |
| ON970597 | Unassigned | Unassigned | Unassigned | 571_6  | Clustered           | 22 VC_571_6  | 22  | 0.1207 | 1          | 0.1207 | 0 | 0 | 0 | 0.8095 Ref |
| ON970598 | Unassigned | Unassigned | Unassigned | 1075_0 | Clustered           | 11 VC_1075_0 | 11  | 0.6562 | 1          | 0.6562 | 0 | 0 | 0 | 0.9273 Ref |
| ON970599 | Unassigned | Unassigned | Unassigned | 952_0  | Clustered           | 39 VC_952_0  | 39  | 0.9064 | 1          | 0.9064 | 0 | 0 | 0 | 1 Ref      |
| ON970600 | Unassigned | Unassigned | Unassigned | 571_6  | Clustered           | 22 VC_571_6  | 22  | 0.1207 | 1          | 0.1207 | 0 | 0 | 0 | 0.8095 Ref |
| ON970601 | Unassigned | Unassigned | Unassigned | 1116_0 | Clustered           | 24 VC_1116_0 | 24  | 0.8376 | 1          | 0.8376 | 0 | 0 | 0 | 1 Ref      |
| ON970602 | Unassigned | Unassigned | Unassigned | 1219_0 | Clustered           | 24 VC_1219_0 | 24  | 0.9519 | 1          | 0.9519 | 0 | 0 | 0 | 1 Ref      |
| ON970603 | Unassigned | Unassigned | Unassigned | 881_0  | Clustered           | 7 VC_881_0   | 7   | 0.3448 | 1          | 0.3448 | 0 | 0 | 0 | 1 Ref      |
| ON970604 | Unassigned | Unassigned | Unassigned | 1207_0 | Clustered           | 20 VC_1207_0 | 20  | 0.9898 | 1          | 0.9898 | 0 | 0 | 0 | 1 Ref      |
| ON970605 | Unassigned | Unassigned | Unassigned | 1296_0 | Clustered           | 82 VC_1296_0 | 82  | 0.7938 | 1          | 0.7938 | 0 | 0 | 0 | 1 Ref      |
| ON970606 | Unassigned | Unassigned | Unassigned | 1296_0 | Clustered           | 82 VC_1296_0 | 82  | 0.7938 | 1          | 0.7938 | 0 | 0 | 0 | 1 Ref      |
| ON970607 | Unassigned | Unassigned | Unassigned | 893_1  | Clustered           | 20 VC_893_1  | 20  | 0.4792 | 1          | 0.4792 | 0 | 0 | 0 | 1 Ref      |
| ON970608 | Unassigned | Unassigned | Unassigned | 1206_0 | Clustered           | 3 VC_1206_0  | 3   | 0.0882 | 0.99850608 | 0.088  | 0 | 0 | 0 | 1 Ref      |
| ON970609 | Unassigned | Unassigned | Unassigned | 952_0  | Clustered           | 39 VC_952_0  | 39  | 0.9064 | 1          | 0.9064 | 0 | 0 | 0 | 1 Ref      |
| ON970610 | Unassigned | Unassigned | Unassigned | 538_67 | Clustered/Singleton | 1 VC_538_67  | 1   | 0      | 1          | 0      | 0 | 0 | 0 | 1 Ref      |
| ON970611 | Unassigned | Unassigned | Unassigned | 592_0  | Clustered           | 16 VC_592_0  | 16  | 0.7259 | 1          | 0.7259 | 0 | 0 | 0 | 1 Ref      |
| ON970612 | Unassigned | Unassigned | Unassigned | 1415_0 | Clustered           | 31 VC_1415_0 | 31  | 0.8456 | 1          | 0.8456 | 0 | 0 | 0 | 1 Ref      |
| ON970613 | Unassigned | Unassigned | Unassigned | 1407_0 | Clustered           | 78 VC_1407_0 | 78  | 0.9731 | 1          | 0.9731 | 0 | 0 | 0 | 1 Ref      |
| ON970614 | Unassigned | Unassigned | Unassigned | 535_0  | Clustered           | 18 VC_535_0  | 18  | 0.1595 | 1          | 0.1595 | 0 | 0 | 0 | 1 Ref      |
| ON970616 | Unassigned | Unassigned | Unassigned | 1250_0 | Clustered           | 29 VC_1250_0 | 29  | 0.822  | 1          | 0.822  | 0 | 0 | 0 | 1 Ref      |
| ON970618 | Unassigned | Unassigned | Unassigned | 783_0  | Clustered           | 67 VC_783_0  | 67  | 0.8945 | 1          | 0.8945 | 0 | 0 | 0 | 1 Ref      |
| ON970619 | Unassigned | Unassigned | Unassigned | 1219_0 | Clustered           | 24 VC_1219_0 | 24  | 0.9519 | 1          | 0.9519 | 0 | 0 | 0 | 1 Ref      |
| ON970620 | Unassigned | Unassigned | Unassigned | 590_0  | Clustered           | 9 VC_590_0   | 9   | 0.4952 | 1          | 0.4952 | 0 | 0 | 0 | 1 Ref      |
| ON970621 | Unassigned | Unassigned | Unassigned | 952_0  | Clustered           | 39 VC_952_0  | 39  | 0.9064 | 1          | 0.9064 | 0 | 0 | 0 | 1 Ref      |
| ON970622 | Unassigned | Unassigned | Unassigned | 898_1  | Clustered           | 27 VC_898_1  | 27  | 0.8894 | 1          | 0.8894 | 0 | 0 | 0 | 1 Ref      |
| ON970623 | Unassigned | Unassigned | Unassigned | 531_0  | Clustered           | 32 VC_531_0  | 32  | 0.6859 | 1          | 0.6859 | 0 | 0 | 0 | 1 Ref      |
| ON970624 | Unassigned | Unassigned | Unassigned | 335_58 | Clustered/Singleton | 1 VC_335_58  | 1   | 0      | 1          | 0      | 0 | 0 | 0 | 1 Ref      |
| ON970625 | Unassigned | Unassigned | Unassigned | 974_0  | Clustered           | 34 VC_974_0  | 34  | 0.7953 | 1          | 0.7953 | 0 | 0 | 0 | 1 Ref      |
| ON970626 | Unassigned | Unassigned | Unassigned | 974_0  | Clustered           | 34 VC_974_0  | 34  | 0.7953 | 1          | 0.7953 | 0 | 0 | 0 | 1 Ref      |
| ON970627 | Unassigned | Unassigned | Unassigned | 335_23 | Clustered           | 17 VC_335_23 | 17  | 0.0714 | 1          | 0.0714 | 0 | 0 | 0 | 0.6397 Ref |
| ON989481 | Unassigned | Unassigned | Unassigned | 8_0    | Clustered           | 58 VC_8_0    | 58  | 0.8285 | 1          | 0.8285 | 0 | 0 | 0 | 0.9946 Ref |
| ON995367 | Unassigned | Unassigned | Unassigned | 402_0  | Clustered           | 3 VC_402_0   | 3   | 0.051  | 0.99861562 | 0.051  | 0 | 0 | 0 | 1 Ref      |
| ON996339 | Unassigned | Unassigned | Unassigned | 654_0  | Clustered           | 115 VC_654_0 | 115 | 0.7303 | 1          | 0.7303 | 0 | 0 | 0 | 0.8764 Ref |
| ON996340 | Unassigned | Unassigned | Unassigned | 377_0  | Clustered           | 16 VC_377_0  | 16  | 0.6424 | 1          | 0.6424 | 0 | 0 | 0 | 1 Ref      |
| OP009265 | Unassigned | Unassigned | Unassigned | 956_0  | Clustered           | 23 VC_956_0  | 23  | 0.944  | 1          | 0.944  | 0 | 0 | 0 | 1 Ref      |
| OP009266 | Unassigned | Unassigned | Unassigned | 956_0  | Clustered           | 23 VC_956_0  | 23  | 0.944  | 1          | 0.944  | 0 | 0 | 0 | 1 Ref      |
| OP009267 | Unassigned | Unassigned | Unassigned | 956_0  | Clustered           | 23 VC_956_0  | 23  | 0.944  | 1          | 0.944  | 0 | 0 | 0 | 1 Ref      |
| OP009268 | Unassigned | Unassigned | Unassigned | 956_0  | Clustered           | 23 VC_956_0  | 23  | 0.944  | 1          | 0.944  | 0 | 0 | 0 | 1 Ref      |
| OP009269 | Unassigned | Unassigned | Unassigned | 956_0  | Clustered           | 23 VC_956_0  | 23  | 0.944  | 1          | 0.944  | 0 | 0 | 0 | 1 Ref      |
| OP009270 | Unassigned | Unassigned | Unassigned | 956_0  | Clustered           | 23 VC_956_0  | 23  | 0.944  | 1          | 0.944  | 0 | 0 | 0 | 1 Ref      |
| OP009271 | Unassigned | Unassigned | Unassigned | 956_0  | Clustered           | 23 VC_956_0  | 23  | 0.944  | 1          | 0.944  | 0 | 0 | 0 | 1 Ref      |
| OP009272 | Unassigned | Unassigned | Unassigned | 914_0  | Clustered           | 11 VC_914_0  | 11  | 0.9693 | 1          | 0.9693 | 0 | 0 | 0 | 1 Ref      |
| OP009273 | Unassigned | Unassigned | Unassigned | 956_0  | Clustered           | 23 VC_956_0  | 23  | 0.944  | 1          | 0.944  | 0 | 0 | 0 | 1 Ref      |
| OP009274 | Unassigned | Unassigned | Unassigned | 1069_0 | Clustered           | 4 VC_1069_0  | 4   | 0.8959 | 0.99995869 | 0.8959 | 0 | 0 | 0 | 1 Ref      |
| OP009275 | Unassigned | Unassigned | Unassigned | 914_0  | Clustered           | 11 VC_914_0  | 11  | 0.9693 | 1          | 0.9693 | 0 | 0 | 0 | 1 Ref      |
| OP009276 | Unassigned | Unassigned | Unassigned | 956_0  | Clustered           | 23 VC_956_0  | 23  | 0.944  | 1          | 0.944  | 0 | 0 | 0 | 1 Ref      |
| OP009277 | Unassigned | Unassigned | Unassigned | 956_0  | Clustered           | 23 VC_956_0  | 23  | 0.944  | 1          | 0.944  | 0 | 0 | 0 | 1 Ref      |
| OP009278 | Unassigned | Unassigned | Unassigned | 914_0  | Clustered           | 11 VC_914_0  | 11  | 0.9693 | 1          | 0.9693 | 0 | 0 | 0 | 1 Ref      |
| OP009279 | Unassigned | Unassigned | Unassigned | 956_0  | Clustered           | 23 VC_956_0  | 23  | 0.944  | 1          | 0.944  | 0 | 0 | 0 | 1 Ref      |
| OP009280 | Unassigned | Unassigned | Unassigned | 914_0  | Clustered           | 11 VC_914_0  | 11  | 0.9693 | 1          | 0.9693 | 0 | 0 | 0 | 1 Ref      |
| OP009281 | Unassigned | Unassigned | Unassigned | 1069_0 | Clustered           | 4 VC_1069_0  | 4   | 0.8959 | 0.99995869 | 0.8959 | 0 | 0 | 0 | 1 Ref      |
| OP009282 | Unassigned | Unassigned | Unassigned | 766_0  | Clustered           | 40 VC_766_0  | 40  | 0.7511 | 1          | 0.7511 | 0 | 0 | 0 | 1 Ref      |
| OP009283 | Unassigned | Unassigned | Unassigned | 956_0  | Clustered           | 23 VC_956_0  | 23  | 0.944  | 1          | 0.944  | 0 | 0 | 0 | 1 Ref      |
| OP009284 | Unassigned | Unassigned | Unassigned | 956_0  | Clustered           | 23 VC_956_0  | 23  | 0.944  | 1          | 0.944  | 0 | 0 | 0 | 1 Ref      |
| OP009285 | Unassigned | Unassigned | Unassigned | 485_0  | Clustered           | 2 VC_485_0   | 2   | 0.0796 | 0.95665719 | 0.0762 | 0 | 0 | 0 | 1 Ref      |
| OP009286 | Unassigned | Unassigned | Unassigned | 914_0  | Clustered           | 11 VC_914_0  | 11  | 0.9693 | 1          | 0.9693 | 0 | 0 | 0 | 1 Ref      |
| OP009287 | Unassigned | Unassigned | Unassigned | 956_0  | Clustered           | 23 VC_956_0  | 23  | 0.944  | 1          | 0.944  | 0 | 0 | 0 | 1 Ref      |
| OP009288 | Unassigned | Unassigned | Unassigned | 956_0  | Clustered           | 23 VC_956_0  | 23  | 0.944  | 1          | 0.944  | 0 | 0 | 0 | 1 Ref      |
| OP013026 | Unassigned | Unassigned | Unassigned | 848_0  | Clustered           | 124 VC_848_0 | 124 | 0.9484 | 1          | 0.9484 | 0 | 0 | 0 | 1 Ref      |
| OP018999 | Unassigned | Unassigned | Unassigned | 466_0  | Clustered           | 66 VC_466_0  | 66  | 0.9246 | 1          | 0.9246 | 0 | 0 | 0 | 1 Ref      |



|          |            |            |            |         |                     |              |     |        |            |        |   |   |   |            |
|----------|------------|------------|------------|---------|---------------------|--------------|-----|--------|------------|--------|---|---|---|------------|
| OP019135 | Unassigned | Unassigned | Unassigned | 714_0   | Clustered           | 71 VC_714_0  | 71  | 0.935  | 1          | 0.935  | 0 | 0 | 0 | 1 Ref      |
| OP021677 | Unassigned | Unassigned | Unassigned | 335_62  | Clustered           | 3 VC_335_62  | 3   | 0.0187 | 0.99859194 | 0.0187 | 0 | 0 | 0 | 1 Ref      |
| OP021678 | Unassigned | Unassigned | Unassigned | 1278_0  | Clustered           | 19 VC_1278_0 | 19  | 1      | 1          | 1      | 0 | 0 | 0 | 1 Ref      |
| OP021679 | Unassigned | Unassigned | Unassigned | 231_0   | Clustered           | 19 VC_231_0  | 19  | 0.9378 | 1          | 0.9378 | 0 | 0 | 0 | 1 Ref      |
| OP021680 | Unassigned | Unassigned | Unassigned | 1114_0  | Clustered           | 20 VC_1114_0 | 20  | 0.3238 | 1          | 0.3238 | 0 | 0 | 0 | 0.9842 Ref |
| OP021681 | Unassigned | Unassigned | Unassigned | 579_24  | Clustered/Singleton | 1 VC_579_24  | 1   | 0      | 1          | 0      | 0 | 0 | 0 | 1 Ref      |
| OP021682 | Unassigned | Unassigned | Unassigned | 579_67  | Clustered/Singleton | 1 VC_579_67  | 1   | 0      | 1          | 0      | 0 | 0 | 0 | 1 Ref      |
| OP021683 | Unassigned | Unassigned | Unassigned | 1296_0  | Clustered           | 82 VC_1296_0 | 82  | 0.7938 | 1          | 0.7938 | 0 | 0 | 0 | 1 Ref      |
| OP021684 | Unassigned | Unassigned | Unassigned | 579_50  | Clustered           | 15 VC_579_50 | 15  | 0.0467 | 1          | 0.0467 | 0 | 0 | 0 | 0.9238 Ref |
| OP022426 | Unassigned | Unassigned | Unassigned | 928_0   | Clustered           | 6 VC_928_0   | 6   | 0.4065 | 1          | 0.4065 | 0 | 0 | 0 | 1 Ref      |
| OP028995 | Unassigned | Unassigned | Unassigned | 969_0   | Clustered           | 2 VC_969_0   | 2   | 0.7027 | 0.72985431 | 0.5129 | 0 | 0 | 0 | 1 Ref      |
| OP038318 | Unassigned | Unassigned | Unassigned | 8_0     | Clustered           | 58 VC_8_0    | 58  | 0.8285 | 1          | 0.8285 | 0 | 0 | 0 | 0.9946 Ref |
| OP038319 | Unassigned | Unassigned | Unassigned | 8_0     | Clustered           | 58 VC_8_0    | 58  | 0.8285 | 1          | 0.8285 | 0 | 0 | 0 | 0.9946 Ref |
| OP038320 | Unassigned | Unassigned | Unassigned | 10_0    | Clustered           | 25 VC_10_0   | 25  | 0.3437 | 1          | 0.3437 | 0 | 0 | 0 | 0.9733 Ref |
| OP038547 | Unassigned | Unassigned | Unassigned | 466_0   | Clustered           | 66 VC_466_0  | 66  | 0.9246 | 1          | 0.9246 | 0 | 0 | 0 | 1 Ref      |
| OP045496 | Unassigned | Unassigned | Unassigned | 848_0   | Clustered           | 124 VC_848_0 | 124 | 0.9484 | 1          | 0.9484 | 0 | 0 | 0 | 1 Ref      |
| OP045497 | Unassigned | Unassigned | Unassigned | 686_0   | Clustered           | 25 VC_686_0  | 25  | 0.5501 | 1          | 0.5501 | 0 | 0 | 0 | 0.96 Ref   |
| OP045498 | Unassigned | Unassigned | Unassigned | 199_19  | Clustered           | 12 VC_199_19 | 12  | 0.0651 | 1          | 0.0651 | 0 | 0 | 0 | 0.8636 Ref |
| OP046317 | Unassigned | Unassigned | Unassigned | 859_0   | Clustered           | 67 VC_859_0  | 67  | 0.9622 | 1          | 0.9622 | 0 | 0 | 0 | 1 Ref      |
| OP053360 | Unassigned | Unassigned | Unassigned | 504_0   | Clustered           | 4 VC_504_0   | 4   | 0.2554 | 0.99998753 | 0.2554 | 0 | 0 | 0 | 1 Ref      |
| OP053361 | Unassigned | Unassigned | Unassigned | 504_0   | Clustered           | 4 VC_504_0   | 4   | 0.2554 | 0.99998753 | 0.2554 | 0 | 0 | 0 | 1 Ref      |
| OP053362 | Unassigned | Unassigned | Unassigned | 504_0   | Clustered           | 4 VC_504_0   | 4   | 0.2554 | 0.99998753 | 0.2554 | 0 | 0 | 0 | 1 Ref      |
| OP056089 | Unassigned | Unassigned | Unassigned | 817_0   | Clustered           | 12 VC_817_0  | 12  | 0.8497 | 1          | 0.8497 | 0 | 0 | 0 | 1 Ref      |
| OP056300 | Unassigned | Unassigned | Unassigned | 800_0   | Clustered           | 4 VC_800_0   | 4   | 0.8098 | 0.99985435 | 0.8096 | 0 | 0 | 0 | 1 Ref      |
| OP067662 | Unassigned | Unassigned | Unassigned | 377_0   | Clustered           | 16 VC_377_0  | 16  | 0.6424 | 1          | 0.6424 | 0 | 0 | 0 | 1 Ref      |
| OP068331 | Unassigned | Unassigned | Unassigned | 1212_0  | Clustered           | 21 VC_1212_0 | 21  | 0.711  | 1          | 0.711  | 0 | 0 | 0 | 1 Ref      |
| OP068332 | Unassigned | Unassigned | Unassigned | 1212_0  | Clustered           | 21 VC_1212_0 | 21  | 0.711  | 1          | 0.711  | 0 | 0 | 0 | 1 Ref      |
| OP068333 | Unassigned | Unassigned | Unassigned | 881_1   | Clustered           | 13 VC_881_1  | 13  | 0.5859 | 1          | 0.5859 | 0 | 0 | 0 | 1 Ref      |
| OP068334 | Unassigned | Unassigned | Unassigned | 1510_0  | Clustered           | 4 VC_1510_0  | 4   | 1      | 1          | 1      | 0 | 0 | 0 | 1 Ref      |
| OP068335 | Unassigned | Unassigned | Unassigned | 1425_0  | Clustered           | 6 VC_1425_0  | 6   | 0.2364 | 1          | 0.2364 | 0 | 0 | 0 | 1 Ref      |
| OP068336 | Unassigned | Unassigned | Unassigned | 1212_0  | Clustered           | 21 VC_1212_0 | 21  | 0.711  | 1          | 0.711  | 0 | 0 | 0 | 1 Ref      |
| OP068337 | Unassigned | Unassigned | Unassigned | 1212_0  | Clustered           | 21 VC_1212_0 | 21  | 0.711  | 1          | 0.711  | 0 | 0 | 0 | 1 Ref      |
| OP068338 | Unassigned | Unassigned | Unassigned | 1415_0  | Clustered           | 31 VC_1415_0 | 31  | 0.8456 | 1          | 0.8456 | 0 | 0 | 0 | 1 Ref      |
| OP068339 | Unassigned | Unassigned | Unassigned | 1203_0  | Clustered           | 28 VC_1203_0 | 28  | 0.4905 | 1          | 0.4905 | 0 | 0 | 0 | 1 Ref      |
| OP068340 | Unassigned | Unassigned | Unassigned | 538_22  | Clustered/Singleton | 1 VC_538_22  | 1   | 0      | 1          | 0      | 0 | 0 | 0 | 1 Ref      |
| OP068341 | Unassigned | Unassigned | Unassigned | 579_49  | Clustered           | 7 VC_579_49  | 7   | 0.0194 | 0.98914431 | 0.0191 | 0 | 0 | 0 | 0.8571 Ref |
| OP068342 | Unassigned | Unassigned | Unassigned | 1138_0  | Clustered           | 16 VC_1138_0 | 16  | 0.4566 | 1          | 0.4566 | 0 | 0 | 0 | 1 Ref      |
| OP068343 | Unassigned | Unassigned | Unassigned | 1143_3  | Clustered/Singleton | 1 VC_1143_3  | 1   | 0      | 1          | 0      | 0 | 0 | 0 | 1 Ref      |
| OP068344 | Unassigned | Unassigned | Unassigned | 1212_0  | Clustered           | 21 VC_1212_0 | 21  | 0.711  | 1          | 0.711  | 0 | 0 | 0 | 1 Ref      |
| OP079918 | Unassigned | Unassigned | Unassigned | 466_0   | Clustered           | 66 VC_466_0  | 66  | 0.9246 | 1          | 0.9246 | 0 | 0 | 0 | 1 Ref      |
| OP087522 | Unassigned | Unassigned | Unassigned | 470_0   | Clustered           | 62 VC_470_0  | 62  | 0.902  | 1          | 0.902  | 0 | 0 | 0 | 1 Ref      |
| OP094641 | Unassigned | Unassigned | Unassigned | 595_0   | Clustered           | 35 VC_595_0  | 35  | 0.8809 | 1          | 0.8809 | 0 | 0 | 0 | 1 Ref      |
| OP103917 | Unassigned | Unassigned | Unassigned | 848_0   | Clustered           | 124 VC_848_0 | 124 | 0.9484 | 1          | 0.9484 | 0 | 0 | 0 | 1 Ref      |
| OP103918 | Unassigned | Unassigned | Unassigned | 848_0   | Clustered           | 124 VC_848_0 | 124 | 0.9484 | 1          | 0.9484 | 0 | 0 | 0 | 1 Ref      |
| OP103919 | Unassigned | Unassigned | Unassigned | 848_0   | Clustered           | 124 VC_848_0 | 124 | 0.9484 | 1          | 0.9484 | 0 | 0 | 0 | 1 Ref      |
| OP103920 | Unassigned | Unassigned | Unassigned | 848_0   | Clustered           | 124 VC_848_0 | 124 | 0.9484 | 1          | 0.9484 | 0 | 0 | 0 | 1 Ref      |
| OP103921 | Unassigned | Unassigned | Unassigned | 848_0   | Clustered           | 124 VC_848_0 | 124 | 0.9484 | 1          | 0.9484 | 0 | 0 | 0 | 1 Ref      |
| OP103922 | Unassigned | Unassigned | Unassigned | 848_0   | Clustered           | 124 VC_848_0 | 124 | 0.9484 | 1          | 0.9484 | 0 | 0 | 0 | 1 Ref      |
| OP103923 | Unassigned | Unassigned | Unassigned | 848_0   | Clustered           | 124 VC_848_0 | 124 | 0.9484 | 1          | 0.9484 | 0 | 0 | 0 | 1 Ref      |
| OP114730 | Unassigned | Unassigned | Unassigned | 125_0   | Clustered           | 23 VC_125_0  | 23  | 0.8163 | 1          | 0.8163 | 0 | 0 | 0 | 1 Ref      |
| OP114731 | Unassigned | Unassigned | Unassigned | 113_0   | Clustered           | 91 VC_113_0  | 91  | 0.9584 | 1          | 0.9584 | 0 | 0 | 0 | 1 Ref      |
| OP114732 | Unassigned | Unassigned | Unassigned | 249_1   | Clustered           | 21 VC_249_1  | 21  | 0.6775 | 1          | 0.6775 | 0 | 0 | 0 | 0.8476 Ref |
| OP117450 | Unassigned | Unassigned | Unassigned | 861_0   | Clustered           | 29 VC_861_0  | 29  | 0.9954 | 1          | 0.9954 | 0 | 0 | 0 | 1 Ref      |
| OP121182 | Unassigned | Unassigned | Unassigned | 238_0   | Clustered           | 3 VC_238_0   | 3   | 0.2285 | 0.99828147 | 0.2281 | 0 | 0 | 0 | 1 Ref      |
| OP125534 | Unassigned | Unassigned | Unassigned | 366_0   | Clustered           | 4 VC_366_0   | 4   | 0.1731 | 0.99998684 | 0.1731 | 0 | 0 | 0 | 0.8333 Ref |
| OP131293 | Unassigned | Unassigned | Unassigned | 502_0   | Clustered           | 18 VC_502_0  | 18  | 0.8808 | 1          | 0.8808 | 0 | 0 | 0 | 1 Ref      |
| OP131294 | Unassigned | Unassigned | Unassigned | 502_0   | Clustered           | 18 VC_502_0  | 18  | 0.8808 | 1          | 0.8808 | 0 | 0 | 0 | 1 Ref      |
| OP131295 | Unassigned | Unassigned | Unassigned | 502_0   | Clustered           | 18 VC_502_0  | 18  | 0.8808 | 1          | 0.8808 | 0 | 0 | 0 | 1 Ref      |
| OP131296 | Unassigned | Unassigned | Unassigned | 502_0   | Clustered           | 18 VC_502_0  | 18  | 0.8808 | 1          | 0.8808 | 0 | 0 | 0 | 1 Ref      |
| OP131297 | Unassigned | Unassigned | Unassigned | 502_0   | Clustered           | 18 VC_502_0  | 18  | 0.8808 | 1          | 0.8808 | 0 | 0 | 0 | 1 Ref      |
| OP131299 | Unassigned | Unassigned | Unassigned | 502_0   | Clustered           | 18 VC_502_0  | 18  | 0.8808 | 1          | 0.8808 | 0 | 0 | 0 | 1 Ref      |
| OP131300 | Unassigned | Unassigned | Unassigned | 502_0   | Clustered           | 18 VC_502_0  | 18  | 0.8808 | 1          | 0.8808 | 0 | 0 | 0 | 1 Ref      |
| OP131301 | Unassigned | Unassigned | Unassigned | 502_0   | Clustered           | 18 VC_502_0  | 18  | 0.8808 | 1          | 0.8808 | 0 | 0 | 0 | 1 Ref      |
| OP131302 | Unassigned | Unassigned | Unassigned | 502_0   | Clustered           | 18 VC_502_0  | 18  | 0.8808 | 1          | 0.8808 | 0 | 0 | 0 | 1 Ref      |
| OP132241 | Unassigned | Unassigned | Unassigned | 440_0   | Clustered           | 33 VC_440_0  | 33  | 0.992  | 1          | 0.992  | 0 | 0 | 0 | 1 Ref      |
| OP136131 | Unassigned | Unassigned | Unassigned | 8_0     | Clustered           | 58 VC_8_0    | 58  | 0.8285 | 1          | 0.8285 | 0 | 0 | 0 | 0.9946 Ref |
| OP136132 | Unassigned | Unassigned | Unassigned | 8_0     | Clustered           | 58 VC_8_0    | 58  | 0.8285 | 1          | 0.8285 | 0 | 0 | 0 | 0.9946 Ref |
| OP136133 | Unassigned | Unassigned | Unassigned | 7_0     | Clustered           | 28 VC_7_0    | 28  | 0.389  | 1          | 0.389  | 0 | 0 | 0 | 0.9947 Ref |
| OP136134 | Unassigned | Unassigned | Unassigned | 8_0     | Clustered           | 58 VC_8_0    | 58  | 0.8285 | 1          | 0.8285 | 0 | 0 | 0 | 0.9946 Ref |
| OP136135 | Unassigned | Unassigned | Unassigned | 10_0    | Clustered           | 25 VC_10_0   | 25  | 0.3437 | 1          | 0.3437 | 0 | 0 | 0 | 0.9733 Ref |
| OP136151 | Unassigned | Unassigned | Unassigned | 1281_0  | Clustered           | 2 VC_1281_0  | 2   | 0.9858 | 0.81445332 | 0.8029 | 0 | 0 | 0 | 1 Ref      |
| OP168678 | Unassigned | Unassigned | Unassigned | 11_0    | Clustered           | 19 VC_11_0   | 19  | 0.7544 | 1          | 0.7544 | 0 | 0 | 0 | 1 Ref      |
| OP168898 | Unassigned | Unassigned | Unassigned | 290_135 | Clustered/Singleton | 1 VC_290_135 | 1   | 0      | 1          | 0      | 0 | 0 | 0 | 1 Ref      |
| OP171942 | Unassigned | Unassigned | Unassigned | 714_0   | Clustered           | 71 VC_714_0  | 71  | 0.935  | 1          | 0.935  | 0 | 0 | 0 | 1 Ref      |
| OP171943 | Unassigned | Unassigned | Unassigned | 200_0   | Clustered           | 15 VC_200_0  | 15  | 0.5004 | 1          | 0.5004 | 0 | 0 | 0 | 1 Ref      |
| OP172867 | Unassigned | Unassigned | Unassigned | 537_0   | Clustered           | 39 VC_537_0  | 39  | 0.8148 | 1          | 0.8148 | 0 | 0 | 0 | 1 Ref      |
| OP172868 | Unassigned | Unassigned | Unassigned | 592_0   | Clustered           | 16 VC_592_0  | 16  | 0.7259 | 1          | 0.7259 | 0 | 0 | 0 | 1 Ref      |
| OP172870 | Unassigned | Unassigned | Unassigned | 592_0   | Clustered           | 16 VC_592_0  | 16  | 0.7259 | 1          | 0.7259 | 0 | 0 | 0 | 1 Ref      |
| OP172872 | Unassigned | Unassigned | Unassigned | 783_0   | Clustered           | 67 VC_783_0  | 67  | 0.8945 | 1          | 0.8945 | 0 | 0 | 0 | 1 Ref      |
| OP172873 | Unassigned | Unassigned | Unassigned | 529_0   | Clustered           | 3 VC_529_0   | 3   | 0.109  | 0.99858726 | 0.1089 | 0 | 0 | 0 | 1 Ref      |
| OP172874 | Unassigned | Unassigned | Unassigned | 529_0   | Clustered           | 3 VC_529_0   | 3   | 0.109  | 0.99858726 | 0.1089 | 0 | 0 | 0 | 1 Ref      |



|          |            |            |            |        |                     |     |           |     |        |            |        |   |   |   |            |
|----------|------------|------------|------------|--------|---------------------|-----|-----------|-----|--------|------------|--------|---|---|---|------------|
| OP172875 | Unassigned | Unassigned | Unassigned | 1287_0 | Clustered           | 44  | VC_1287_0 | 44  | 1      | 1          | 1      | 0 | 0 | 0 | 1 Ref      |
| OP172876 | Unassigned | Unassigned | Unassigned | 592_0  | Clustered           | 16  | VC_592_0  | 16  | 0.7259 | 1          | 0.7259 | 0 | 0 | 0 | 1 Ref      |
| OP172877 | Unassigned | Unassigned | Unassigned | 1136_0 | Clustered           | 40  | VC_1136_0 | 40  | 0.8746 | 1          | 0.8746 | 0 | 0 | 0 | 1 Ref      |
| OP172878 | Unassigned | Unassigned | Unassigned | 1244_0 | Clustered           | 4   | VC_1244_0 | 4   | 0.8666 | 0.9999992  | 0.8666 | 0 | 0 | 0 | 1 Ref      |
| OP177727 | Unassigned | Unassigned | Unassigned | 872_0  | Clustered           | 28  | VC_872_0  | 28  | 0.7887 | 1          | 0.7887 | 0 | 0 | 0 | 1 Ref      |
| OP186293 | Unassigned | Unassigned | Unassigned | 1012_2 | Clustered/Singleton | 1   | VC_1012_2 | 1   | 0      | 1          | 0      | 0 | 0 | 0 | 1 Ref      |
| OP197928 | Unassigned | Unassigned | Unassigned | 290_22 | Clustered/Singleton | 1   | VC_290_22 | 1   | 0      | 1          | 0      | 0 | 0 | 0 | 1 Ref      |
| OP209174 | Unassigned | Unassigned | Unassigned | 1155_0 | Clustered           | 14  | VC_1155_0 | 14  | 0.8287 | 1          | 0.8287 | 0 | 0 | 0 | 1 Ref      |
| OP209176 | Unassigned | Unassigned | Unassigned | 1354_0 | Clustered           | 6   | VC_1354_0 | 6   | 0.6609 | 0.99999272 | 0.6609 | 0 | 0 | 0 | 1 Ref      |
| OP235318 | Unassigned | Unassigned | Unassigned | 155_15 | Clustered           | 16  | VC_155_15 | 16  | 0.0779 | 1          | 0.0779 | 0 | 0 | 0 | 0.8083 Ref |
| OP251154 | Unassigned | Unassigned | Unassigned | 470_0  | Clustered           | 62  | VC_470_0  | 62  | 0.902  | 1          | 0.902  | 0 | 0 | 0 | 1 Ref      |
| OP254195 | Unassigned | Unassigned | Unassigned | 711_0  | Clustered           | 48  | VC_711_0  | 48  | 0.8217 | 1          | 0.8217 | 0 | 0 | 0 | 1 Ref      |
| OP256047 | Unassigned | Unassigned | Unassigned | 848_0  | Clustered           | 124 | VC_848_0  | 124 | 0.9484 | 1          | 0.9484 | 0 | 0 | 0 | 1 Ref      |
| OP256049 | Unassigned | Unassigned | Unassigned | 930_0  | Clustered           | 4   | VC_930_0  | 4   | 0.2568 | 0.99997246 | 0.2568 | 0 | 0 | 0 | 1 Ref      |
| OP263967 | Unassigned | Unassigned | Unassigned | 155_9  | Clustered           | 3   | VC_155_9  | 3   | 0.0083 | 0.97241045 | 0.0081 | 0 | 0 | 0 | 1 Ref      |
| OP263968 | Unassigned | Unassigned | Unassigned | 155_19 | Clustered/Singleton | 1   | VC_155_19 | 1   | 0      | 1          | 0      | 0 | 0 | 0 | 1 Ref      |
| OP263969 | Unassigned | Unassigned | Unassigned | 159_0  | Clustered           | 25  | VC_159_0  | 25  | 0.7699 | 1          | 0.7699 | 0 | 0 | 0 | 1 Ref      |
| OP265889 | Unassigned | Unassigned | Unassigned | 30_1   | Clustered           | 53  | VC_30_1   | 53  | 0.7151 | 1          | 0.7151 | 0 | 0 | 0 | 0.9325 Ref |
| OP267563 | Unassigned | Unassigned | Unassigned | 972_0  | Clustered           | 99  | VC_972_0  | 99  | 0.9113 | 1          | 0.9113 | 0 | 0 | 0 | 0.9928 Ref |
| OP279344 | Unassigned | Unassigned | Unassigned | 254_0  | Clustered           | 14  | VC_254_0  | 14  | 0.9118 | 1          | 0.9118 | 0 | 0 | 0 | 0.967 Ref  |
| OP291336 | Unassigned | Unassigned | Unassigned | 714_0  | Clustered           | 71  | VC_714_0  | 71  | 0.935  | 1          | 0.935  | 0 | 0 | 0 | 1 Ref      |
| OP292222 | Unassigned | Unassigned | Unassigned | 297_6  | Clustered           | 12  | VC_297_6  | 12  | 0.1139 | 1          | 0.1139 | 0 | 0 | 0 | 0.8182 Ref |
| OP292288 | Unassigned | Unassigned | Unassigned | 434_0  | Clustered           | 45  | VC_434_0  | 45  | 0.9479 | 1          | 0.9479 | 0 | 0 | 0 | 1 Ref      |
| OP292654 | Unassigned | Unassigned | Unassigned | 170_6  | Clustered/Singleton | 1   | VC_170_6  | 1   | 0      | 1          | 0      | 0 | 0 | 0 | 1 Ref      |
| OP292673 | Unassigned | Unassigned | Unassigned | 603_0  | Clustered           | 28  | VC_603_0  | 28  | 0.7692 | 1          | 0.7692 | 0 | 0 | 0 | 1 Ref      |
| OP292674 | Unassigned | Unassigned | Unassigned | 603_0  | Clustered           | 28  | VC_603_0  | 28  | 0.7692 | 1          | 0.7692 | 0 | 0 | 0 | 1 Ref      |
| OP293079 | Unassigned | Unassigned | Unassigned | 365_0  | Clustered           | 6   | VC_365_0  | 6   | 0.5395 | 1          | 0.5395 | 0 | 0 | 0 | 1 Ref      |
| OP293233 | Unassigned | Unassigned | Unassigned | 837_0  | Clustered           | 12  | VC_837_0  | 12  | 0.2327 | 1          | 0.2327 | 0 | 0 | 0 | 1 Ref      |
| OP294982 | Unassigned | Unassigned | Unassigned | 783_0  | Clustered           | 67  | VC_783_0  | 67  | 0.8945 | 1          | 0.8945 | 0 | 0 | 0 | 1 Ref      |
| OP296941 | Unassigned | Unassigned | Unassigned | 601_3  | Clustered           | 12  | VC_601_3  | 12  | 0.2339 | 1          | 0.2339 | 0 | 0 | 0 | 0.8636 Ref |
| OP297178 | Unassigned | Unassigned | Unassigned | 155_6  | Clustered/Singleton | 1   | VC_155_6  | 1   | 0      | 1          | 0      | 0 | 0 | 0 | 1 Ref      |
| OP297528 | Unassigned | Unassigned | Unassigned | 538_78 | Clustered           | 2   | VC_538_78 | 2   | 0.008  | 0.95761522 | 0.0076 | 0 | 0 | 0 | 1 Ref      |
| OP297529 | Unassigned | Unassigned | Unassigned | 535_1  | Clustered           | 108 | VC_535_1  | 108 | 0.8479 | 1          | 0.8479 | 0 | 0 | 0 | 0.9955 Ref |
| OP297531 | Unassigned | Unassigned | Unassigned | 952_0  | Clustered           | 39  | VC_952_0  | 39  | 0.9064 | 1          | 0.9064 | 0 | 0 | 0 | 1 Ref      |
| OP297532 | Unassigned | Unassigned | Unassigned | 228_0  | Clustered           | 22  | VC_228_0  | 22  | 0.7411 | 1          | 0.7411 | 0 | 0 | 0 | 1 Ref      |
| OP297533 | Unassigned | Unassigned | Unassigned | 834_0  | Clustered           | 18  | VC_834_0  | 18  | 0.9116 | 1          | 0.9116 | 0 | 0 | 0 | 1 Ref      |
| OP297534 | Unassigned | Unassigned | Unassigned | 579_39 | Clustered           | 3   | VC_579_39 | 3   | 0.0063 | 0.72858376 | 0.0046 | 0 | 0 | 0 | 0.6667 Ref |
| OP297535 | Unassigned | Unassigned | Unassigned | 990_0  | Clustered           | 3   | VC_990_0  | 3   | 0.7715 | 0.99134622 | 0.7648 | 0 | 0 | 0 | 1 Ref      |
| OP297536 | Unassigned | Unassigned | Unassigned | 538_31 | Clustered           | 11  | VC_538_31 | 11  | 0.0894 | 1          | 0.0894 | 0 | 0 | 0 | 0.6 Ref    |
| OP297537 | Unassigned | Unassigned | Unassigned | 223_6  | Clustered           | 42  | VC_223_6  | 42  | 0.4717 | 1          | 0.4717 | 0 | 0 | 0 | 0.8351 Ref |
| OP297538 | Unassigned | Unassigned | Unassigned | 1424_0 | Clustered           | 31  | VC_1424_0 | 31  | 0.8834 | 1          | 0.8834 | 0 | 0 | 0 | 1 Ref      |
| OP297539 | Unassigned | Unassigned | Unassigned | 1141_0 | Clustered           | 4   | VC_1141_0 | 4   | 0.5416 | 0.99996462 | 0.5416 | 0 | 0 | 0 | 1 Ref      |
| OP297540 | Unassigned | Unassigned | Unassigned | 539_0  | Clustered           | 37  | VC_539_0  | 37  | 0.911  | 1          | 0.911  | 0 | 0 | 0 | 1 Ref      |
| OP297541 | Unassigned | Unassigned | Unassigned | 385_4  | Clustered           | 3   | VC_385_4  | 3   | 0.0329 | 0.99853257 | 0.0329 | 0 | 0 | 0 | 1 Ref      |
| OP297542 | Unassigned | Unassigned | Unassigned | 538_55 | Clustered/Singleton | 1   | VC_538_55 | 1   | 0      | 1          | 0      | 0 | 0 | 0 | 1 Ref      |
| OP297543 | Unassigned | Unassigned | Unassigned | 1415_0 | Clustered           | 31  | VC_1415_0 | 31  | 0.8456 | 1          | 0.8456 | 0 | 0 | 0 | 1 Ref      |
| OP297544 | Unassigned | Unassigned | Unassigned | 1216_0 | Clustered           | 22  | VC_1216_0 | 22  | 0.4546 | 1          | 0.4546 | 0 | 0 | 0 | 1 Ref      |
| OP297546 | Unassigned | Unassigned | Unassigned | 543_0  | Clustered           | 25  | VC_543_0  | 25  | 0.4584 | 1          | 0.4584 | 0 | 0 | 0 | 1 Ref      |
| OP297547 | Unassigned | Unassigned | Unassigned | 893_1  | Clustered           | 20  | VC_893_1  | 20  | 0.4792 | 1          | 0.4792 | 0 | 0 | 0 | 1 Ref      |
| OP297548 | Unassigned | Unassigned | Unassigned | 540_1  | Clustered           | 5   | VC_540_1  | 5   | 0.1012 | 0.99999997 | 0.1012 | 0 | 0 | 0 | 0.8 Ref    |
| OP297549 | Unassigned | Unassigned | Unassigned | 228_0  | Clustered           | 22  | VC_228_0  | 22  | 0.7411 | 1          | 0.7411 | 0 | 0 | 0 | 1 Ref      |
| OP297550 | Unassigned | Unassigned | Unassigned | 1207_0 | Clustered           | 20  | VC_1207_0 | 20  | 0.9898 | 1          | 0.9898 | 0 | 0 | 0 | 1 Ref      |
| OP297551 | Unassigned | Unassigned | Unassigned | 785_1  | Clustered           | 9   | VC_785_1  | 9   | 0.3679 | 1          | 0.3679 | 0 | 0 | 0 | 1 Ref      |
| OP297552 | Unassigned | Unassigned | Unassigned | 1207_0 | Clustered           | 20  | VC_1207_0 | 20  | 0.9898 | 1          | 0.9898 | 0 | 0 | 0 | 1 Ref      |
| OP297553 | Unassigned | Unassigned | Unassigned | 222_1  | Clustered           | 19  | VC_222_1  | 19  | 0.4166 | 1          | 0.4166 | 0 | 0 | 0 | 1 Ref      |
| OP297622 | Unassigned | Unassigned | Unassigned | 0_0    | Clustered           | 3   | VC_0_0    | 3   | 1      | 1          | 1      | 0 | 0 | 0 | 1 Ref      |
| OP310970 | Unassigned | Unassigned | Unassigned | 80_7   | Clustered           | 33  | VC_80_7   | 33  | 0.2156 | 1          | 0.2156 | 0 | 0 | 0 | 0.8409 Ref |
| OP310971 | Unassigned | Unassigned | Unassigned | 80_7   | Clustered           | 33  | VC_80_7   | 33  | 0.2156 | 1          | 0.2156 | 0 | 0 | 0 | 0.8409 Ref |
| OP310972 | Unassigned | Unassigned | Unassigned | 80_7   | Clustered           | 33  | VC_80_7   | 33  | 0.2156 | 1          | 0.2156 | 0 | 0 | 0 | 0.8409 Ref |
| OP310973 | Unassigned | Unassigned | Unassigned | 80_7   | Clustered           | 33  | VC_80_7   | 33  | 0.2156 | 1          | 0.2156 | 0 | 0 | 0 | 0.8409 Ref |
| OP310974 | Unassigned | Unassigned | Unassigned | 80_6   | Clustered           | 11  | VC_80_6   | 11  | 0.0527 | 1          | 0.0527 | 0 | 0 | 0 | 0.7455 Ref |
| OP310975 | Unassigned | Unassigned | Unassigned | 80_0   | Clustered           | 64  | VC_80_0   | 64  | 0.418  | 1          | 0.418  | 0 | 0 | 0 | 0.7649 Ref |
| OP310976 | Unassigned | Unassigned | Unassigned | 80_7   | Clustered           | 33  | VC_80_7   | 33  | 0.2156 | 1          | 0.2156 | 0 | 0 | 0 | 0.8409 Ref |
| OP310977 | Unassigned | Unassigned | Unassigned | 80_0   | Clustered           | 64  | VC_80_0   | 64  | 0.418  | 1          | 0.418  | 0 | 0 | 0 | 0.7649 Ref |
| OP310978 | Unassigned | Unassigned | Unassigned | 80_7   | Clustered           | 33  | VC_80_7   | 33  | 0.2156 | 1          | 0.2156 | 0 | 0 | 0 | 0.8409 Ref |
| OP310979 | Unassigned | Unassigned | Unassigned | 80_3   | Clustered/Singleton | 1   | VC_80_3   | 1   | 0      | 1          | 0      | 0 | 0 | 0 | 1 Ref      |
| OP310980 | Unassigned | Unassigned | Unassigned | 80_7   | Clustered           | 33  | VC_80_7   | 33  | 0.2156 | 1          | 0.2156 | 0 | 0 | 0 | 0.8409 Ref |
| OP310981 | Unassigned | Unassigned | Unassigned | 80_7   | Clustered           | 33  | VC_80_7   | 33  | 0.2156 | 1          | 0.2156 | 0 | 0 | 0 | 0.8409 Ref |
| OP310982 | Unassigned | Unassigned | Unassigned | 80_7   | Clustered           | 33  | VC_80_7   | 33  | 0.2156 | 1          | 0.2156 | 0 | 0 | 0 | 0.8409 Ref |
| OP310983 | Unassigned | Unassigned | Unassigned | 356_0  | Clustered           | 21  | VC_356_0  | 21  | 0.5409 | 1          | 0.5409 | 0 | 0 | 0 | 1 Ref      |
| OP310984 | Unassigned | Unassigned | Unassigned | 356_0  | Clustered           | 21  | VC_356_0  | 21  | 0.5409 | 1          | 0.5409 | 0 | 0 | 0 | 1 Ref      |
| OP312987 | Unassigned | Unassigned | Unassigned | 801_0  | Clustered           | 37  | VC_801_0  | 37  | 0.5672 | 1          | 0.5672 | 0 | 0 | 0 | 1 Ref      |
| OP313111 | Unassigned | Unassigned | Unassigned | 84_0   | Clustered           | 6   | VC_84_0   | 6   | 0.6364 | 1          | 0.6364 | 0 | 0 | 0 | 1 Ref      |
| OP313112 | Unassigned | Unassigned | Unassigned | 806_0  | Clustered           | 6   | VC_806_0  | 6   | 0.5468 | 1          | 0.5468 | 0 | 0 | 0 | 1 Ref      |
| OP314870 | Unassigned | Unassigned | Unassigned | 80_0   | Clustered           | 64  | VC_80_0   | 64  | 0.418  | 1          | 0.418  | 0 | 0 | 0 | 0.7649 Ref |
| OP314871 | Unassigned | Unassigned | Unassigned | 80_0   | Clustered           | 64  | VC_80_0   | 64  | 0.418  | 1          | 0.418  | 0 | 0 | 0 | 0.7649 Ref |
| OP314872 | Unassigned | Unassigned | Unassigned | 80_7   | Clustered           | 33  | VC_80_7   | 33  | 0.2156 | 1          | 0.2156 | 0 | 0 | 0 | 0.8409 Ref |
| OP323059 | Unassigned | Unassigned | Unassigned | 155_15 | Clustered           | 16  | VC_155_15 | 16  | 0.0779 | 1          | 0.0779 | 0 | 0 | 0 | 0.8083 Ref |
| OP328420 | Unassigned | Unassigned | Unassigned | 8_0    | Clustered           | 58  | VC_8_0    | 58  | 0.8285 | 1          | 0.8285 | 0 | 0 | 0 | 0.9946 Ref |
| OP328422 | Unassigned | Unassigned | Unassigned | 8_0    | Clustered           | 58  | VC_8_0    | 58  | 0.8285 | 1          | 0.8285 | 0 | 0 | 0 | 0.9946 Ref |
| OP328423 | Unassigned | Unassigned | Unassigned | 10_0   | Clustered           | 25  | VC_10_0   | 25  | 0.3437 | 1          | 0.3437 | 0 | 0 | 0 | 0.9733 Ref |



|          |            |            |            |        |           |              |     |        |            |        |   |   |   |        |     |
|----------|------------|------------|------------|--------|-----------|--------------|-----|--------|------------|--------|---|---|---|--------|-----|
| OP331213 | Unassigned | Unassigned | Unassigned | 509_0  | Clustered | 36 VC_509_0  | 36  | 0.5291 | 1          | 0.5291 | 0 | 0 | 0 | 0.9714 | Ref |
| OP331230 | Unassigned | Unassigned | Unassigned | 405_0  | Clustered | 126 VC_405_0 | 126 | 0.9614 | 1          | 0.9614 | 0 | 0 | 0 | 1      | Ref |
| OP341624 | Unassigned | Unassigned | Unassigned | 141_0  | Clustered | 5 VC_141_0   | 5   | 0.4539 | 0.99999994 | 0.4539 | 0 | 0 | 0 | 1      | Ref |
| OP341625 | Unassigned | Unassigned | Unassigned | 103_0  | Clustered | 3 VC_103_0   | 3   | 0.369  | 0.99763908 | 0.3682 | 0 | 0 | 0 | 1      | Ref |
| OP341626 | Unassigned | Unassigned | Unassigned | 141_0  | Clustered | 5 VC_141_0   | 5   | 0.4539 | 0.99999994 | 0.4539 | 0 | 0 | 0 | 1      | Ref |
| OP341627 | Unassigned | Unassigned | Unassigned | 141_0  | Clustered | 5 VC_141_0   | 5   | 0.4539 | 0.99999994 | 0.4539 | 0 | 0 | 0 | 1      | Ref |
| OP341628 | Unassigned | Unassigned | Unassigned | 141_0  | Clustered | 5 VC_141_0   | 5   | 0.4539 | 0.99999994 | 0.4539 | 0 | 0 | 0 | 1      | Ref |
| OP341630 | Unassigned | Unassigned | Unassigned | 141_0  | Clustered | 5 VC_141_0   | 5   | 0.4539 | 0.99999994 | 0.4539 | 0 | 0 | 0 | 1      | Ref |
| OP342787 | Unassigned | Unassigned | Unassigned | 486_0  | Clustered | 47 VC_486_0  | 47  | 0.9022 | 1          | 0.9022 | 0 | 0 | 0 | 1      | Ref |
| OP352608 | Unassigned | Unassigned | Unassigned | 636_0  | Clustered | 13 VC_636_0  | 13  | 0.6223 | 1          | 0.6223 | 0 | 0 | 0 | 1      | Ref |
| OP361299 | Unassigned | Unassigned | Unassigned | 175_0  | Clustered | 20 VC_175_0  | 20  | 0.7504 | 1          | 0.7504 | 0 | 0 | 0 | 1      | Ref |
| OP373729 | Unassigned | Unassigned | Unassigned | 474_0  | Clustered | 19 VC_474_0  | 19  | 0.3729 | 1          | 0.3729 | 0 | 0 | 0 | 1      | Ref |
| OP374154 | Unassigned | Unassigned | Unassigned | 8_0    | Clustered | 58 VC_8_0    | 58  | 0.8285 | 1          | 0.8285 | 0 | 0 | 0 | 0.9946 | Ref |
| OP374155 | Unassigned | Unassigned | Unassigned | 8_0    | Clustered | 58 VC_8_0    | 58  | 0.8285 | 1          | 0.8285 | 0 | 0 | 0 | 0.9946 | Ref |
| OP374156 | Unassigned | Unassigned | Unassigned | 8_0    | Clustered | 58 VC_8_0    | 58  | 0.8285 | 1          | 0.8285 | 0 | 0 | 0 | 0.9946 | Ref |
| OP375635 | Unassigned | Unassigned | Unassigned | 661_2  | Clustered | 6 VC_661_2   | 6   | 0.1674 | 1          | 0.1674 | 0 | 0 | 0 | 1      | Ref |
| OP377721 | Unassigned | Unassigned | Unassigned | 30_1   | Clustered | 53 VC_30_1   | 53  | 0.7151 | 1          | 0.7151 | 0 | 0 | 0 | 0.9325 | Ref |
| OP380269 | Unassigned | Unassigned | Unassigned | 175_0  | Clustered | 20 VC_175_0  | 20  | 0.7504 | 1          | 0.7504 | 0 | 0 | 0 | 1      | Ref |
| OP380511 | Unassigned | Unassigned | Unassigned | 256_0  | Clustered | 2 VC_256_0   | 2   | 0.0437 | 0.95611024 | 0.0418 | 0 | 0 | 0 | 1      | Ref |
| OP381444 | Unassigned | Unassigned | Unassigned | 1060_0 | Clustered | 4 VC_1060_0  | 4   | 0.875  | 0.99993415 | 0.8749 | 0 | 0 | 0 | 1      | Ref |
| OP394141 | Unassigned | Unassigned | Unassigned | 198_23 | Clustered | 10 VC_198_23 | 10  | 0.0697 | 1          | 0.0697 | 0 | 0 | 0 | 0.8444 | Ref |
| OP394178 | Unassigned | Unassigned | Unassigned | 41_0   | Clustered | 3 VC_41_0    | 3   | 1      | 0          | 0      | 0 | 0 | 0 | 1      | Ref |
| OP413828 | Unassigned | Unassigned | Unassigned | 466_0  | Clustered | 66 VC_466_0  | 66  | 0.9246 | 1          | 0.9246 | 0 | 0 | 0 | 1      | Ref |
| OP413829 | Unassigned | Unassigned | Unassigned | 113_0  | Clustered | 91 VC_113_0  | 91  | 0.9584 | 1          | 0.9584 | 0 | 0 | 0 | 1      | Ref |
| OP413830 | Unassigned | Unassigned | Unassigned | 466_0  | Clustered | 66 VC_466_0  | 66  | 0.9246 | 1          | 0.9246 | 0 | 0 | 0 | 1      | Ref |
| OP413832 | Unassigned | Unassigned | Unassigned | 972_0  | Clustered | 99 VC_972_0  | 99  | 0.9113 | 1          | 0.9113 | 0 | 0 | 0 | 0.9928 | Ref |
| OP422637 | Unassigned | Unassigned | Unassigned | 766_0  | Clustered | 40 VC_766_0  | 40  | 0.7511 | 1          | 0.7511 | 0 | 0 | 0 | 1      | Ref |
| OP433453 | Unassigned | Unassigned | Unassigned | 1512_0 | Clustered | 2 VC_1512_0  | 2   | 1      | 1          | 1      | 0 | 0 | 0 | 1      | Ref |
| OP434439 | Unassigned | Unassigned | Unassigned | 1287_0 | Clustered | 44 VC_1287_0 | 44  | 1      | 1          | 1      | 0 | 0 | 0 | 1      | Ref |
| OP434440 | Unassigned | Unassigned | Unassigned | 543_0  | Clustered | 25 VC_543_0  | 25  | 0.4584 | 1          | 0.4584 | 0 | 0 | 0 | 1      | Ref |
| OP434441 | Unassigned | Unassigned | Unassigned | 527_0  | Clustered | 37 VC_527_0  | 37  | 0.9679 | 1          | 0.9679 | 0 | 0 | 0 | 1      | Ref |
| OP434442 | Unassigned | Unassigned | Unassigned | 1075_0 | Clustered | 11 VC_1075_0 | 11  | 0.6562 | 1          | 0.6562 | 0 | 0 | 0 | 0.9273 | Ref |
| OP434443 | Unassigned | Unassigned | Unassigned | 1287_0 | Clustered | 44 VC_1287_0 | 44  | 1      | 1          | 1      | 0 | 0 | 0 | 1      | Ref |
| OP434444 | Unassigned | Unassigned | Unassigned | 1200_0 | Clustered | 73 VC_1200_0 | 73  | 0.9825 | 1          | 0.9825 | 0 | 0 | 0 | 1      | Ref |
| OP434445 | Unassigned | Unassigned | Unassigned | 1287_0 | Clustered | 44 VC_1287_0 | 44  | 1      | 1          | 1      | 0 | 0 | 0 | 1      | Ref |
| OP434447 | Unassigned | Unassigned | Unassigned | 230_0  | Clustered | 38 VC_230_0  | 38  | 0.9076 | 1          | 0.9076 | 0 | 0 | 0 | 1      | Ref |
| OP434448 | Unassigned | Unassigned | Unassigned | 896_0  | Clustered | 9 VC_896_0   | 9   | 0.2604 | 1          | 0.2604 | 0 | 0 | 0 | 1      | Ref |
| OP434450 | Unassigned | Unassigned | Unassigned | 893_1  | Clustered | 20 VC_893_1  | 20  | 0.4792 | 1          | 0.4792 | 0 | 0 | 0 | 1      | Ref |
| OP434451 | Unassigned | Unassigned | Unassigned | 825_0  | Clustered | 17 VC_825_0  | 17  | 0.8364 | 1          | 0.8364 | 0 | 0 | 0 | 1      | Ref |
| OP434452 | Unassigned | Unassigned | Unassigned | 1211_0 | Clustered | 3 VC_1211_0  | 3   | 0.3232 | 0.99834213 | 0.3227 | 0 | 0 | 0 | 1      | Ref |
| OP434453 | Unassigned | Unassigned | Unassigned | 1436_0 | Clustered | 3 VC_1436_0  | 3   | 0.9803 | 0.9595722  | 0.9406 | 0 | 0 | 0 | 1      | Ref |
| OP434454 | Unassigned | Unassigned | Unassigned | 537_0  | Clustered | 39 VC_537_0  | 39  | 0.8148 | 1          | 0.8148 | 0 | 0 | 0 | 1      | Ref |
| OP434455 | Unassigned | Unassigned | Unassigned | 1250_0 | Clustered | 29 VC_1250_0 | 29  | 0.822  | 1          | 0.822  | 0 | 0 | 0 | 1      | Ref |
| OP434456 | Unassigned | Unassigned | Unassigned | 1136_0 | Clustered | 40 VC_1136_0 | 40  | 0.8746 | 1          | 0.8746 | 0 | 0 | 0 | 1      | Ref |
| OP434457 | Unassigned | Unassigned | Unassigned | 540_1  | Clustered | 5 VC_540_1   | 5   | 0.1012 | 0.99999997 | 0.1012 | 0 | 0 | 0 | 0.8    | Ref |
| OP434458 | Unassigned | Unassigned | Unassigned | 578_0  | Clustered | 3 VC_578_0   | 3   | 0.0807 | 0.99853749 | 0.0806 | 0 | 0 | 0 | 0.6667 | Ref |
| OP434459 | Unassigned | Unassigned | Unassigned | 384_11 | Clustered | 31 VC_384_11 | 31  | 0.0926 | 1          | 0.0926 | 0 | 0 | 0 | 0.7011 | Ref |
| OP434460 | Unassigned | Unassigned | Unassigned | 701_0  | Clustered | 16 VC_701_0  | 16  | 0.2957 | 1          | 0.2957 | 0 | 0 | 0 | 0.9167 | Ref |
| OP434461 | Unassigned | Unassigned | Unassigned | 528_0  | Clustered | 12 VC_528_0  | 12  | 0.3923 | 1          | 0.3923 | 0 | 0 | 0 | 0.9697 | Ref |
| OP434462 | Unassigned | Unassigned | Unassigned | 1204_0 | Clustered | 25 VC_1204_0 | 25  | 0.7382 | 1          | 0.7382 | 0 | 0 | 0 | 1      | Ref |
| OP434463 | Unassigned | Unassigned | Unassigned | 1075_0 | Clustered | 11 VC_1075_0 | 11  | 0.6562 | 1          | 0.6562 | 0 | 0 | 0 | 0.9273 | Ref |
| OP453108 | Unassigned | Unassigned | Unassigned | 611_0  | Clustered | 50 VC_611_0  | 50  | 0.7306 | 1          | 0.7306 | 0 | 0 | 0 | 1      | Ref |
| OP455115 | Unassigned | Unassigned | Unassigned | 595_0  | Clustered | 35 VC_595_0  | 35  | 0.8809 | 1          | 0.8809 | 0 | 0 | 0 | 1      | Ref |
| OP480062 | Unassigned | Unassigned | Unassigned | 601_0  | Clustered | 4 VC_601_0   | 4   | 0.0581 | 0.99996075 | 0.0581 | 0 | 0 | 0 | 1      | Ref |
| OP480063 | Unassigned | Unassigned | Unassigned | 601_0  | Clustered | 4 VC_601_0   | 4   | 0.0581 | 0.99996075 | 0.0581 | 0 | 0 | 0 | 1      | Ref |
| OP481875 | Unassigned | Unassigned | Unassigned | 474_0  | Clustered | 19 VC_474_0  | 19  | 0.3729 | 1          | 0.3729 | 0 | 0 | 0 | 1      | Ref |
| OP484843 | Unassigned | Unassigned | Unassigned | 5_0    | Clustered | 27 VC_5_0    | 27  | 0.9599 | 1          | 0.9599 | 0 | 0 | 0 | 1      | Ref |
| OP484850 | Unassigned | Unassigned | Unassigned | 654_0  | Clustered | 115 VC_654_0 | 115 | 0.7303 | 1          | 0.7303 | 0 | 0 | 0 | 0.8764 | Ref |
| OP484857 | Unassigned | Unassigned | Unassigned | 792_0  | Clustered | 5 VC_792_0   | 5   | 0.8313 | 0.99999405 | 0.8313 | 0 | 0 | 0 | 1      | Ref |
| OP484858 | Unassigned | Unassigned | Unassigned | 792_0  | Clustered | 5 VC_792_0   | 5   | 0.8313 | 0.99999405 | 0.8313 | 0 | 0 | 0 | 1      | Ref |
| OP493557 | Unassigned | Unassigned | Unassigned | 7_0    | Clustered | 28 VC_7_0    | 28  | 0.389  | 1          | 0.389  | 0 | 0 | 0 | 0.9947 | Ref |
| OP493558 | Unassigned | Unassigned | Unassigned | 10_0   | Clustered | 25 VC_10_0   | 25  | 0.3437 | 1          | 0.3437 | 0 | 0 | 0 | 0.9733 | Ref |
| OP494211 | Unassigned | Unassigned | Unassigned | 654_0  | Clustered | 115 VC_654_0 | 115 | 0.7303 | 1          | 0.7303 | 0 | 0 | 0 | 0.8764 | Ref |
| OP494865 | Unassigned | Unassigned | Unassigned | 637_0  | Clustered | 27 VC_637_0  | 27  | 0.8807 | 1          | 0.8807 | 0 | 0 | 0 | 1      | Ref |
| OP503543 | Unassigned | Unassigned | Unassigned | 637_0  | Clustered | 27 VC_637_0  | 27  | 0.8807 | 1          | 0.8807 | 0 | 0 | 0 | 1      | Ref |
| OP503968 | Unassigned | Unassigned | Unassigned | 637_0  | Clustered | 27 VC_637_0  | 27  | 0.8807 | 1          | 0.8807 | 0 | 0 | 0 | 1      | Ref |
| OP503969 | Unassigned | Unassigned | Unassigned | 637_0  | Clustered | 27 VC_637_0  | 27  | 0.8807 | 1          | 0.8807 | 0 | 0 | 0 | 1      | Ref |
| OP503970 | Unassigned | Unassigned | Unassigned | 637_0  | Clustered | 27 VC_637_0  | 27  | 0.8807 | 1          | 0.8807 | 0 | 0 | 0 | 1      | Ref |
| OP503971 | Unassigned | Unassigned | Unassigned | 637_0  | Clustered | 27 VC_637_0  | 27  | 0.8807 | 1          | 0.8807 | 0 | 0 | 0 | 1      | Ref |
| OP503972 | Unassigned | Unassigned | Unassigned | 637_0  | Clustered | 27 VC_637_0  | 27  | 0.8807 | 1          | 0.8807 | 0 | 0 | 0 | 1      | Ref |
| OP503973 | Unassigned | Unassigned | Unassigned | 637_0  | Clustered | 27 VC_637_0  | 27  | 0.8807 | 1          | 0.8807 | 0 | 0 | 0 | 1      | Ref |
| OP503974 | Unassigned | Unassigned | Unassigned | 637_0  | Clustered | 27 VC_637_0  | 27  | 0.8807 | 1          | 0.8807 | 0 | 0 | 0 | 1      | Ref |
| OP503975 | Unassigned | Unassigned | Unassigned | 637_0  | Clustered | 27 VC_637_0  | 27  | 0.8807 | 1          | 0.8807 | 0 | 0 | 0 | 1      | Ref |
| OP503976 | Unassigned | Unassigned | Unassigned | 637_0  | Clustered | 27 VC_637_0  | 27  | 0.8807 | 1          | 0.8807 | 0 | 0 | 0 | 1      | Ref |
| OP503977 | Unassigned | Unassigned | Unassigned | 637_0  | Clustered | 27 VC_637_0  | 27  | 0.8807 | 1          | 0.8807 | 0 | 0 | 0 | 1      | Ref |
| OP503978 | Unassigned | Unassigned | Unassigned | 637_0  | Clustered | 27 VC_637_0  | 27  | 0.8807 | 1          | 0.8807 | 0 | 0 | 0 | 1      | Ref |
| OP503979 | Unassigned | Unassigned | Unassigned | 637_0  | Clustered | 27 VC_637_0  | 27  | 0.8807 | 1          | 0.8807 | 0 | 0 | 0 | 1      | Ref |
| OP503980 | Unassigned | Unassigned | Unassigned | 637_0  | Clustered | 27 VC_637_0  | 27  | 0.8807 | 1          | 0.8807 | 0 | 0 | 0 | 1      | Ref |
| OP503981 | Unassigned | Unassigned | Unassigned | 637_0  | Clustered | 27 VC_637_0  | 27  | 0.8807 | 1          | 0.8807 | 0 | 0 | 0 | 1      | Ref |
| OP503982 | Unassigned | Unassigned | Unassigned | 637_0  | Clustered | 27 VC_637_0  | 27  | 0.8807 | 1          | 0.8807 | 0 | 0 | 0 | 1      | Ref |
| OP503983 | Unassigned | Unassigned | Unassigned | 637_0  | Clustered | 27 VC_637_0  | 27  | 0.8807 | 1          | 0.8807 | 0 | 0 | 0 | 1      | Ref |



|          |            |            |            |        |                     |               |     |        |            |        |   |   |   |            |
|----------|------------|------------|------------|--------|---------------------|---------------|-----|--------|------------|--------|---|---|---|------------|
| OP503984 | Unassigned | Unassigned | Unassigned | 637_0  | Clustered           | 27 VC_637_0   | 27  | 0.8807 | 1          | 0.8807 | 0 | 0 | 0 | 1 Ref      |
| OP503985 | Unassigned | Unassigned | Unassigned | 637_0  | Clustered           | 27 VC_637_0   | 27  | 0.8807 | 1          | 0.8807 | 0 | 0 | 0 | 1 Ref      |
| OP503986 | Unassigned | Unassigned | Unassigned | 637_0  | Clustered           | 27 VC_637_0   | 27  | 0.8807 | 1          | 0.8807 | 0 | 0 | 0 | 1 Ref      |
| OP503987 | Unassigned | Unassigned | Unassigned | 637_0  | Clustered           | 27 VC_637_0   | 27  | 0.8807 | 1          | 0.8807 | 0 | 0 | 0 | 1 Ref      |
| OP503988 | Unassigned | Unassigned | Unassigned | 637_0  | Clustered           | 27 VC_637_0   | 27  | 0.8807 | 1          | 0.8807 | 0 | 0 | 0 | 1 Ref      |
| OP503992 | Unassigned | Unassigned | Unassigned | 725_0  | Clustered           | 47 VC_725_0   | 47  | 0.8649 | 1          | 0.8649 | 0 | 0 | 0 | 1 Ref      |
| OP503993 | Unassigned | Unassigned | Unassigned | 725_0  | Clustered           | 47 VC_725_0   | 47  | 0.8649 | 1          | 0.8649 | 0 | 0 | 0 | 1 Ref      |
| OP503994 | Unassigned | Unassigned | Unassigned | 725_0  | Clustered           | 47 VC_725_0   | 47  | 0.8649 | 1          | 0.8649 | 0 | 0 | 0 | 1 Ref      |
| OP503995 | Unassigned | Unassigned | Unassigned | 725_0  | Clustered           | 47 VC_725_0   | 47  | 0.8649 | 1          | 0.8649 | 0 | 0 | 0 | 1 Ref      |
| OP508218 | Unassigned | Unassigned | Unassigned | 714_0  | Clustered           | 71 VC_714_0   | 71  | 0.935  | 1          | 0.935  | 0 | 0 | 0 | 1 Ref      |
| OP535471 | Unassigned | Unassigned | Unassigned | 611_0  | Clustered           | 50 VC_611_0   | 50  | 0.7306 | 1          | 0.7306 | 0 | 0 | 0 | 1 Ref      |
| OP535472 | Unassigned | Unassigned | Unassigned | 611_0  | Clustered           | 50 VC_611_0   | 50  | 0.7306 | 1          | 0.7306 | 0 | 0 | 0 | 1 Ref      |
| OP547477 | Unassigned | Unassigned | Unassigned | 911_0  | Clustered           | 20 VC_911_0   | 20  | 0.9915 | 1          | 0.9915 | 0 | 0 | 0 | 1 Ref      |
| OP547478 | Unassigned | Unassigned | Unassigned | 935_2  | Clustered           | 7 VC_935_2    | 7   | 0.2837 | 1          | 0.2837 | 0 | 0 | 0 | 1 Ref      |
| OP549864 | Unassigned | Unassigned | Unassigned | 1399_0 | Clustered           | 3 VC_1399_0   | 3   | 0.4928 | 0.99528984 | 0.4905 | 0 | 0 | 0 | 1 Ref      |
| OP549865 | Unassigned | Unassigned | Unassigned | 1399_0 | Clustered           | 3 VC_1399_0   | 3   | 0.4928 | 0.99528984 | 0.4905 | 0 | 0 | 0 | 1 Ref      |
| OP549866 | Unassigned | Unassigned | Unassigned | 1399_0 | Clustered           | 3 VC_1399_0   | 3   | 0.4928 | 0.99528984 | 0.4905 | 0 | 0 | 0 | 1 Ref      |
| OP549867 | Unassigned | Unassigned | Unassigned | 1334_0 | Clustered           | 7 VC_1334_0   | 7   | 0.6918 | 1          | 0.6918 | 0 | 0 | 0 | 1 Ref      |
| OP549868 | Unassigned | Unassigned | Unassigned | 1299_0 | Clustered           | 53 VC_1299_0  | 53  | 0.8666 | 1          | 0.8666 | 0 | 0 | 0 | 1 Ref      |
| OP549869 | Unassigned | Unassigned | Unassigned | 1145_0 | Clustered           | 164 VC_1145_0 | 164 | 0.8868 | 1          | 0.8868 | 0 | 0 | 0 | 1 Ref      |
| OP549870 | Unassigned | Unassigned | Unassigned | 1191_0 | Clustered           | 9 VC_1191_0   | 9   | 0.8537 | 1          | 0.8537 | 0 | 0 | 0 | 1 Ref      |
| OP549871 | Unassigned | Unassigned | Unassigned | 1299_0 | Clustered           | 53 VC_1299_0  | 53  | 0.8666 | 1          | 0.8666 | 0 | 0 | 0 | 1 Ref      |
| OP549872 | Unassigned | Unassigned | Unassigned | 1145_0 | Clustered           | 164 VC_1145_0 | 164 | 0.8868 | 1          | 0.8868 | 0 | 0 | 0 | 1 Ref      |
| OP549873 | Unassigned | Unassigned | Unassigned | 1191_0 | Clustered           | 9 VC_1191_0   | 9   | 0.8537 | 1          | 0.8537 | 0 | 0 | 0 | 1 Ref      |
| OP549874 | Unassigned | Unassigned | Unassigned | 1299_0 | Clustered           | 53 VC_1299_0  | 53  | 0.8666 | 1          | 0.8666 | 0 | 0 | 0 | 1 Ref      |
| OP549875 | Unassigned | Unassigned | Unassigned | 1145_0 | Clustered           | 164 VC_1145_0 | 164 | 0.8868 | 1          | 0.8868 | 0 | 0 | 0 | 1 Ref      |
| OP549876 | Unassigned | Unassigned | Unassigned | 1145_0 | Clustered           | 164 VC_1145_0 | 164 | 0.8868 | 1          | 0.8868 | 0 | 0 | 0 | 1 Ref      |
| OP549877 | Unassigned | Unassigned | Unassigned | 1191_0 | Clustered           | 9 VC_1191_0   | 9   | 0.8537 | 1          | 0.8537 | 0 | 0 | 0 | 1 Ref      |
| OP549878 | Unassigned | Unassigned | Unassigned | 1548_0 | Clustered           | 2 VC_1548_0   | 2   | 1      | 1          | 1      | 0 | 0 | 0 | 1 Ref      |
| OP549879 | Unassigned | Unassigned | Unassigned | 1548_0 | Clustered           | 2 VC_1548_0   | 2   | 1      | 1          | 1      | 0 | 0 | 0 | 1 Ref      |
| OP555980 | Unassigned | Unassigned | Unassigned | 290_4  | Clustered           | 5 VC_290_4    | 5   | 0.0111 | 0.99999967 | 0.0111 | 0 | 0 | 0 | 1 Ref      |
| OP555981 | Unassigned | Unassigned | Unassigned | 290_4  | Clustered           | 5 VC_290_4    | 5   | 0.0111 | 0.99999967 | 0.0111 | 0 | 0 | 0 | 1 Ref      |
| OP555982 | Unassigned | Unassigned | Unassigned | 290_4  | Clustered           | 5 VC_290_4    | 5   | 0.0111 | 0.99999967 | 0.0111 | 0 | 0 | 0 | 1 Ref      |
| OP556577 | Unassigned | Unassigned | Unassigned | 434_0  | Clustered           | 45 VC_434_0   | 45  | 0.9479 | 1          | 0.9479 | 0 | 0 | 0 | 1 Ref      |
| OP559177 | Unassigned | Unassigned | Unassigned | 711_0  | Clustered           | 48 VC_711_0   | 48  | 0.8217 | 1          | 0.8217 | 0 | 0 | 0 | 1 Ref      |
| OP559178 | Unassigned | Unassigned | Unassigned | 93_1   | Clustered/Singleton | 1 VC_93_1     | 1   | 0      | 1          | 0      | 0 | 0 | 0 | 1 Ref      |
| OP562383 | Unassigned | Unassigned | Unassigned | 871_1  | Clustered           | 26 VC_871_1   | 26  | 0.6303 | 1          | 0.6303 | 0 | 0 | 0 | 0.9815 Ref |
| OP572230 | Unassigned | Unassigned | Unassigned | 290_4  | Clustered           | 5 VC_290_4    | 5   | 0.0111 | 0.99999967 | 0.0111 | 0 | 0 | 0 | 1 Ref      |
| OP580516 | Unassigned | Unassigned | Unassigned | 1073_0 | Clustered           | 2 VC_1073_0   | 2   | 0.0707 | 0.95326364 | 0.0674 | 0 | 0 | 0 | 1 Ref      |
| OP580517 | Unassigned | Unassigned | Unassigned | 1406_0 | Clustered           | 21 VC_1406_0  | 21  | 0.9836 | 1          | 0.9836 | 0 | 0 | 0 | 1 Ref      |
| OP580518 | Unassigned | Unassigned | Unassigned | 1407_0 | Clustered           | 78 VC_1407_0  | 78  | 0.9731 | 1          | 0.9731 | 0 | 0 | 0 | 1 Ref      |
| OP584903 | Unassigned | Unassigned | Unassigned | 8_0    | Clustered           | 58 VC_8_0     | 58  | 0.8285 | 1          | 0.8285 | 0 | 0 | 0 | 0.9946 Ref |
| OP584904 | Unassigned | Unassigned | Unassigned | 8_0    | Clustered           | 58 VC_8_0     | 58  | 0.8285 | 1          | 0.8285 | 0 | 0 | 0 | 0.9946 Ref |
| OP585103 | Unassigned | Unassigned | Unassigned | 510_1  | Clustered           | 20 VC_510_1   | 20  | 0.4172 | 1          | 0.4172 | 0 | 0 | 0 | 1 Ref      |
| OP585104 | Unassigned | Unassigned | Unassigned | 713_0  | Clustered           | 26 VC_713_0   | 26  | 0.9358 | 1          | 0.9358 | 0 | 0 | 0 | 1 Ref      |
| OP585105 | Unassigned | Unassigned | Unassigned | 715_0  | Clustered           | 10 VC_715_0   | 10  | 0.8045 | 1          | 0.8045 | 0 | 0 | 0 | 1 Ref      |
| OP595601 | Unassigned | Unassigned | Unassigned | 911_0  | Clustered           | 20 VC_911_0   | 20  | 0.9915 | 1          | 0.9915 | 0 | 0 | 0 | 1 Ref      |
| OP610151 | Unassigned | Unassigned | Unassigned | 135_22 | Clustered           | 13 VC_135_22  | 13  | 0.0795 | 1          | 0.0795 | 0 | 0 | 0 | 0.8205 Ref |
| OP611406 | Unassigned | Unassigned | Unassigned | 971_0  | Clustered           | 40 VC_971_0   | 40  | 0.6793 | 1          | 0.6793 | 0 | 0 | 0 | 0.9359 Ref |
| OP617560 | Unassigned | Unassigned | Unassigned | 84_0   | Clustered           | 6 VC_84_0     | 6   | 0.6364 | 1          | 0.6364 | 0 | 0 | 0 | 1 Ref      |
| OP617742 | Unassigned | Unassigned | Unassigned | 972_0  | Clustered           | 99 VC_972_0   | 99  | 0.9113 | 1          | 0.9113 | 0 | 0 | 0 | 0.9928 Ref |
| OP617743 | Unassigned | Unassigned | Unassigned | 872_1  | Clustered/Singleton | 1 VC_872_1    | 1   | 0      | 1          | 0      | 0 | 0 | 0 | 1 Ref      |
| OP617744 | Unassigned | Unassigned | Unassigned | 1090_0 | Clustered           | 8 VC_1090_0   | 8   | 0.6377 | 1          | 0.6377 | 0 | 0 | 0 | 1 Ref      |
| OP617745 | Unassigned | Unassigned | Unassigned | 170_10 | Clustered           | 5 VC_170_10   | 5   | 0.0614 | 0.96483582 | 0.0592 | 0 | 0 | 0 | 1 Ref      |
| OP617746 | Unassigned | Unassigned | Unassigned | 686_1  | Clustered/Singleton | 1 VC_686_1    | 1   | 0      | 1          | 0      | 0 | 0 | 0 | 1 Ref      |
| OP617747 | Unassigned | Unassigned | Unassigned | 398_0  | Clustered           | 51 VC_398_0   | 51  | 0.8741 | 1          | 0.8741 | 0 | 0 | 0 | 1 Ref      |
| OP617748 | Unassigned | Unassigned | Unassigned | 509_0  | Clustered           | 36 VC_509_0   | 36  | 0.5291 | 1          | 0.5291 | 0 | 0 | 0 | 0.9714 Ref |
| OP650937 | Unassigned | Unassigned | Unassigned | 307_0  | Clustered           | 2 VC_307_0    | 2   | 0.1267 | 0.95445632 | 0.1209 | 0 | 0 | 0 | 1 Ref      |
| OP684128 | Unassigned | Unassigned | Unassigned | 686_0  | Clustered           | 25 VC_686_0   | 25  | 0.5501 | 1          | 0.5501 | 0 | 0 | 0 | 0.96 Ref   |
| OU342754 | Unassigned | Unassigned | Unassigned | 848_0  | Clustered           | 124 VC_848_0  | 124 | 0.9484 | 1          | 0.9484 | 0 | 0 | 0 | 1 Ref      |
| OU342755 | Unassigned | Unassigned | Unassigned | 972_0  | Clustered           | 99 VC_972_0   | 99  | 0.9113 | 1          | 0.9113 | 0 | 0 | 0 | 0.9928 Ref |
| OU343167 | Unassigned | Unassigned | Unassigned | 356_1  | Clustered           | 3 VC_356_1    | 3   | 0.0359 | 0.93699065 | 0.0336 | 0 | 0 | 0 | 1 Ref      |
| OU509533 | Unassigned | Unassigned | Unassigned | 113_0  | Clustered           | 91 VC_113_0   | 91  | 0.9584 | 1          | 0.9584 | 0 | 0 | 0 | 1 Ref      |
| OU509534 | Unassigned | Unassigned | Unassigned | 113_0  | Clustered           | 91 VC_113_0   | 91  | 0.9584 | 1          | 0.9584 | 0 | 0 | 0 | 1 Ref      |
| OU509535 | Unassigned | Unassigned | Unassigned | 170_10 | Clustered           | 5 VC_170_10   | 5   | 0.0614 | 0.96483582 | 0.0592 | 0 | 0 | 0 | 1 Ref      |
| OU509536 | Unassigned | Unassigned | Unassigned | 509_0  | Clustered           | 36 VC_509_0   | 36  | 0.5291 | 1          | 0.5291 | 0 | 0 | 0 | 0.9714 Ref |
| OU734268 | Unassigned | Unassigned | Unassigned | 976_0  | Clustered           | 36 VC_976_0   | 36  | 0.7833 | 1          | 0.7833 | 0 | 0 | 0 | 1 Ref      |
| OU784549 | Unassigned | Unassigned | Unassigned | 235_0  | Clustered           | 60 VC_235_0   | 60  | 0.9413 | 1          | 0.9413 | 0 | 0 | 0 | 1 Ref      |
| OU784746 | Unassigned | Unassigned | Unassigned | 235_0  | Clustered           | 60 VC_235_0   | 60  | 0.9413 | 1          | 0.9413 | 0 | 0 | 0 | 1 Ref      |
| OU784750 | Unassigned | Unassigned | Unassigned | 235_0  | Clustered           | 60 VC_235_0   | 60  | 0.9413 | 1          | 0.9413 | 0 | 0 | 0 | 1 Ref      |
| OV032860 | Unassigned | Unassigned | Unassigned | 935_2  | Clustered           | 7 VC_935_2    | 7   | 0.2837 | 1          | 0.2837 | 0 | 0 | 0 | 1 Ref      |
| OV032902 | Unassigned | Unassigned | Unassigned | 358_2  | Clustered/Singleton | 1 VC_358_2    | 1   | 0      | 1          | 0      | 0 | 0 | 0 | 1 Ref      |
| OV049961 | Unassigned | Unassigned | Unassigned | 801_0  | Clustered           | 37 VC_801_0   | 37  | 0.5672 | 1          | 0.5672 | 0 | 0 | 0 | 1 Ref      |
| OV101294 | Unassigned | Unassigned | Unassigned | 794_19 | Clustered           | 16 VC_794_19  | 16  | 0.0975 | 0.99616626 | 0.0971 | 0 | 0 | 0 | 0.8083 Ref |
| OV121131 | Unassigned | Unassigned | Unassigned | 168_0  | Clustered           | 18 VC_168_0   | 18  | 0.7394 | 1          | 0.7394 | 0 | 0 | 0 | 0.8627 Ref |
| OV192280 | Unassigned | Unassigned | Unassigned | 235_0  | Clustered           | 60 VC_235_0   | 60  | 0.9413 | 1          | 0.9413 | 0 | 0 | 0 | 1 Ref      |
| OV696608 | Unassigned | Unassigned | Unassigned | 32_1   | Clustered           | 16 VC_32_1    | 16  | 0.1962 | 1          | 0.1962 | 0 | 0 | 0 | 0.8333 Ref |
| OV696610 | Unassigned | Unassigned | Unassigned | 53_0   | Clustered           | 10 VC_53_0    | 10  | 0.1743 | 1          | 0.1743 | 0 | 0 | 0 | 1 Ref      |
| OV696611 | Unassigned | Unassigned | Unassigned | 6_0    | Clustered           | 44 VC_6_0     | 44  | 0.9068 | 1          | 0.9068 | 0 | 0 | 0 | 1 Ref      |
| OV696612 | Unassigned | Unassigned | Unassigned | 45_0   | Clustered           | 38 VC_45_0    | 38  | 0.5785 | 1          | 0.5785 | 0 | 0 | 0 | 0.9659 Ref |
| OV696614 | Unassigned | Unassigned | Unassigned | 738_0  | Clustered           | 9 VC_738_0    | 9   | 0.7116 | 1          | 0.7116 | 0 | 0 | 0 | 1 Ref      |



|          |            |            |            |         |                     |              |     |        |            |  |        |   |   |   |            |
|----------|------------|------------|------------|---------|---------------------|--------------|-----|--------|------------|--|--------|---|---|---|------------|
| OV696619 | Unassigned | Unassigned | Unassigned | 883_0   | Clustered           | 5 VC_883_0   | 5   | 0.3514 | 0.99996062 |  | 0.3514 | 0 | 0 | 0 | 1 Ref      |
| OV696621 | Unassigned | Unassigned | Unassigned | 888_0   | Clustered           | 9 VC_888_0   | 9   | 0.5251 | 1          |  | 0.5251 | 0 | 0 | 0 | 1 Ref      |
| OV754623 | Unassigned | Unassigned | Unassigned | 293_13  | Clustered           | 10 VC_293_13 | 10  | 0.0698 | 0.99999931 |  | 0.0698 | 0 | 0 | 0 | 0.9556 Ref |
| OV876900 | Unassigned | Unassigned | Unassigned | 290_140 | Clustered           | 2 VC_290_140 | 2   | 0.0028 | 0.93732589 |  | 0.0026 | 0 | 0 | 0 | 1 Ref      |
| OV876907 | Unassigned | Unassigned | Unassigned | 297_6   | Clustered           | 12 VC_297_6  | 12  | 0.1139 | 1          |  | 0.1139 | 0 | 0 | 0 | 0.8182 Ref |
| OV877085 | Unassigned | Unassigned | Unassigned | 290_140 | Clustered           | 2 VC_290_140 | 2   | 0.0028 | 0.93732589 |  | 0.0026 | 0 | 0 | 0 | 1 Ref      |
| OV877339 | Unassigned | Unassigned | Unassigned | 971_0   | Clustered           | 40 VC_971_0  | 40  | 0.6793 | 1          |  | 0.6793 | 0 | 0 | 0 | 0.9359 Ref |
| OV877387 | Unassigned | Unassigned | Unassigned | 971_0   | Clustered           | 40 VC_971_0  | 40  | 0.6793 | 1          |  | 0.6793 | 0 | 0 | 0 | 0.9359 Ref |
| OV877511 | Unassigned | Unassigned | Unassigned | 293_13  | Clustered           | 10 VC_293_13 | 10  | 0.0698 | 0.99999931 |  | 0.0698 | 0 | 0 | 0 | 0.9556 Ref |
| OV877765 | Unassigned | Unassigned | Unassigned | 297_6   | Clustered           | 12 VC_297_6  | 12  | 0.1139 | 1          |  | 0.1139 | 0 | 0 | 0 | 0.8182 Ref |
| OV877766 | Unassigned | Unassigned | Unassigned | 971_0   | Clustered           | 40 VC_971_0  | 40  | 0.6793 | 1          |  | 0.6793 | 0 | 0 | 0 | 0.9359 Ref |
| OW251746 | Unassigned | Unassigned | Unassigned | 972_0   | Clustered           | 99 VC_972_0  | 99  | 0.9113 | 1          |  | 0.9113 | 0 | 0 | 0 | 0.9928 Ref |
| OW991345 | Unassigned | Unassigned | Unassigned | 801_0   | Clustered           | 37 VC_801_0  | 37  | 0.5672 | 1          |  | 0.5672 | 0 | 0 | 0 | 1 Ref      |
| OX001802 | Unassigned | Unassigned | Unassigned | 609_0   | Clustered           | 27 VC_609_0  | 27  | 0.9943 | 1          |  | 0.9943 | 0 | 0 | 0 | 1 Ref      |
| OX016465 | Unassigned | Unassigned | Unassigned | 340_3   | Clustered           | 24 VC_340_3  | 24  | 0.1205 | 1          |  | 0.1205 | 0 | 0 | 0 | 0.7283 Ref |
| OX090893 | Unassigned | Unassigned | Unassigned | 872_0   | Clustered           | 28 VC_872_0  | 28  | 0.7887 | 1          |  | 0.7887 | 0 | 0 | 0 | 1 Ref      |
| OX241425 | Unassigned | Unassigned | Unassigned | 117_0   | Clustered           | 2 VC_117_0   | 2   | 0.4363 | 0.8861     |  | 0.3866 | 0 | 0 | 0 | 1 Ref      |
| OX241426 | Unassigned | Unassigned | Unassigned | 518_0   | Clustered           | 16 VC_518_0  | 16  | 0.9983 | 1          |  | 0.9983 | 0 | 0 | 0 | 1 Ref      |
| OX241427 | Unassigned | Unassigned | Unassigned | 1091_1  | Clustered           | 29 VC_1091_1 | 29  | 0.4856 | 1          |  | 0.4856 | 0 | 0 | 0 | 0.9581 Ref |
| OX241428 | Unassigned | Unassigned | Unassigned | 518_0   | Clustered           | 16 VC_518_0  | 16  | 0.9983 | 1          |  | 0.9983 | 0 | 0 | 0 | 1 Ref      |
| OX241429 | Unassigned | Unassigned | Unassigned | 665_0   | Clustered           | 29 VC_665_0  | 29  | 0.9121 | 1          |  | 0.9121 | 0 | 0 | 0 | 1 Ref      |
| OX241430 | Unassigned | Unassigned | Unassigned | 518_0   | Clustered           | 16 VC_518_0  | 16  | 0.9983 | 1          |  | 0.9983 | 0 | 0 | 0 | 1 Ref      |
| OX241431 | Unassigned | Unassigned | Unassigned | 518_0   | Clustered           | 16 VC_518_0  | 16  | 0.9983 | 1          |  | 0.9983 | 0 | 0 | 0 | 1 Ref      |
| OX241432 | Unassigned | Unassigned | Unassigned | 518_0   | Clustered           | 16 VC_518_0  | 16  | 0.9983 | 1          |  | 0.9983 | 0 | 0 | 0 | 1 Ref      |
| OX241434 | Unassigned | Unassigned | Unassigned | 934_0   | Clustered           | 7 VC_934_0   | 7   | 0.7358 | 1          |  | 0.7358 | 0 | 0 | 0 | 1 Ref      |
| OX241435 | Unassigned | Unassigned | Unassigned | 775_0   | Clustered           | 18 VC_775_0  | 18  | 0.7364 | 1          |  | 0.7364 | 0 | 0 | 0 | 1 Ref      |
| OX241436 | Unassigned | Unassigned | Unassigned | 775_0   | Clustered           | 18 VC_775_0  | 18  | 0.7364 | 1          |  | 0.7364 | 0 | 0 | 0 | 1 Ref      |
| OX241437 | Unassigned | Unassigned | Unassigned | 511_3   | Clustered/Singleton | 1 VC_511_3   | 1   | 0      | 1          |  | 0      | 0 | 0 | 0 | 1 Ref      |
| OX241438 | Unassigned | Unassigned | Unassigned | 665_0   | Clustered           | 29 VC_665_0  | 29  | 0.9121 | 1          |  | 0.9121 | 0 | 0 | 0 | 1 Ref      |
| OX241441 | Unassigned | Unassigned | Unassigned | 518_0   | Clustered           | 16 VC_518_0  | 16  | 0.9983 | 1          |  | 0.9983 | 0 | 0 | 0 | 1 Ref      |
| OX241445 | Unassigned | Unassigned | Unassigned | 775_0   | Clustered           | 18 VC_775_0  | 18  | 0.7364 | 1          |  | 0.7364 | 0 | 0 | 0 | 1 Ref      |
| OX241446 | Unassigned | Unassigned | Unassigned | 775_0   | Clustered           | 18 VC_775_0  | 18  | 0.7364 | 1          |  | 0.7364 | 0 | 0 | 0 | 1 Ref      |
| OX241447 | Unassigned | Unassigned | Unassigned | 775_0   | Clustered           | 18 VC_775_0  | 18  | 0.7364 | 1          |  | 0.7364 | 0 | 0 | 0 | 1 Ref      |
| OX241448 | Unassigned | Unassigned | Unassigned | 518_0   | Clustered           | 16 VC_518_0  | 16  | 0.9983 | 1          |  | 0.9983 | 0 | 0 | 0 | 1 Ref      |
| OX241449 | Unassigned | Unassigned | Unassigned | 518_0   | Clustered           | 16 VC_518_0  | 16  | 0.9983 | 1          |  | 0.9983 | 0 | 0 | 0 | 1 Ref      |
| OX241455 | Unassigned | Unassigned | Unassigned | 511_4   | Clustered/Singleton | 1 VC_511_4   | 1   | 0      | 1          |  | 0      | 0 | 0 | 0 | 1 Ref      |
| OX241494 | Unassigned | Unassigned | Unassigned | 518_0   | Clustered           | 16 VC_518_0  | 16  | 0.9983 | 1          |  | 0.9983 | 0 | 0 | 0 | 1 Ref      |
| OX241498 | Unassigned | Unassigned | Unassigned | 665_0   | Clustered           | 29 VC_665_0  | 29  | 0.9121 | 1          |  | 0.9121 | 0 | 0 | 0 | 1 Ref      |
| OX241501 | Unassigned | Unassigned | Unassigned | 775_0   | Clustered           | 18 VC_775_0  | 18  | 0.7364 | 1          |  | 0.7364 | 0 | 0 | 0 | 1 Ref      |
| OX241504 | Unassigned | Unassigned | Unassigned | 775_0   | Clustered           | 18 VC_775_0  | 18  | 0.7364 | 1          |  | 0.7364 | 0 | 0 | 0 | 1 Ref      |
| OX241556 | Unassigned | Unassigned | Unassigned | 1091_1  | Clustered           | 29 VC_1091_1 | 29  | 0.4856 | 1          |  | 0.4856 | 0 | 0 | 0 | 0.9581 Ref |
| OX241557 | Unassigned | Unassigned | Unassigned | 665_0   | Clustered           | 29 VC_665_0  | 29  | 0.9121 | 1          |  | 0.9121 | 0 | 0 | 0 | 1 Ref      |
| OX241558 | Unassigned | Unassigned | Unassigned | 665_0   | Clustered           | 29 VC_665_0  | 29  | 0.9121 | 1          |  | 0.9121 | 0 | 0 | 0 | 1 Ref      |
| OX241559 | Unassigned | Unassigned | Unassigned | 775_0   | Clustered           | 18 VC_775_0  | 18  | 0.7364 | 1          |  | 0.7364 | 0 | 0 | 0 | 1 Ref      |
| OX241560 | Unassigned | Unassigned | Unassigned | 775_0   | Clustered           | 18 VC_775_0  | 18  | 0.7364 | 1          |  | 0.7364 | 0 | 0 | 0 | 1 Ref      |
| OX241561 | Unassigned | Unassigned | Unassigned | 1081_0  | Clustered           | 9 VC_1081_0  | 9   | 0.6523 | 1          |  | 0.6523 | 0 | 0 | 0 | 1 Ref      |
| OX241562 | Unassigned | Unassigned | Unassigned | 494_0   | Clustered           | 2 VC_494_0   | 2   | 0.3459 | 0.94728727 |  | 0.3277 | 0 | 0 | 0 | 1 Ref      |
| OX241563 | Unassigned | Unassigned | Unassigned | 1091_1  | Clustered           | 29 VC_1091_1 | 29  | 0.4856 | 1          |  | 0.4856 | 0 | 0 | 0 | 0.9581 Ref |
| OX241566 | Unassigned | Unassigned | Unassigned | 959_0   | Clustered           | 3 VC_959_0   | 3   | 0.9422 | 0.99430386 |  | 0.9369 | 0 | 0 | 0 | 1 Ref      |
| OX241567 | Unassigned | Unassigned | Unassigned | 518_0   | Clustered           | 16 VC_518_0  | 16  | 0.9983 | 1          |  | 0.9983 | 0 | 0 | 0 | 1 Ref      |
| OX241568 | Unassigned | Unassigned | Unassigned | 518_0   | Clustered           | 16 VC_518_0  | 16  | 0.9983 | 1          |  | 0.9983 | 0 | 0 | 0 | 1 Ref      |
| OX241569 | Unassigned | Unassigned | Unassigned | 1081_0  | Clustered           | 9 VC_1081_0  | 9   | 0.6523 | 1          |  | 0.6523 | 0 | 0 | 0 | 1 Ref      |
| OX241570 | Unassigned | Unassigned | Unassigned | 959_0   | Clustered           | 3 VC_959_0   | 3   | 0.9422 | 0.99430386 |  | 0.9369 | 0 | 0 | 0 | 1 Ref      |
| OX241572 | Unassigned | Unassigned | Unassigned | 181_0   | Clustered           | 4 VC_181_0   | 4   | 0.3817 | 0.99998259 |  | 0.3817 | 0 | 0 | 0 | 1 Ref      |
| OX241573 | Unassigned | Unassigned | Unassigned | 661_5   | Clustered           | 4 VC_661_5   | 4   | 0.0894 | 0.99996664 |  | 0.0894 | 0 | 0 | 0 | 1 Ref      |
| OX241574 | Unassigned | Unassigned | Unassigned | 661_1   | Clustered/Singleton | 1 VC_661_1   | 1   | 0      | 1          |  | 0      | 0 | 0 | 0 | 1 Ref      |
| OX241575 | Unassigned | Unassigned | Unassigned | 665_0   | Clustered           | 29 VC_665_0  | 29  | 0.9121 | 1          |  | 0.9121 | 0 | 0 | 0 | 1 Ref      |
| OX241591 | Unassigned | Unassigned | Unassigned | 665_0   | Clustered           | 29 VC_665_0  | 29  | 0.9121 | 1          |  | 0.9121 | 0 | 0 | 0 | 1 Ref      |
| OX335359 | Unassigned | Unassigned | Unassigned | 848_0   | Clustered           | 124 VC_848_0 | 124 | 0.9484 | 1          |  | 0.9484 | 0 | 0 | 0 | 1 Ref      |
| OX335360 | Unassigned | Unassigned | Unassigned | 848_0   | Clustered           | 124 VC_848_0 | 124 | 0.9484 | 1          |  | 0.9484 | 0 | 0 | 0 | 1 Ref      |
| OX335361 | Unassigned | Unassigned | Unassigned | 971_0   | Clustered           | 40 VC_971_0  | 40  | 0.6793 | 1          |  | 0.6793 | 0 | 0 | 0 | 0.9359 Ref |
| OX335369 | Unassigned | Unassigned | Unassigned | 972_0   | Clustered           | 99 VC_972_0  | 99  | 0.9113 | 1          |  | 0.9113 | 0 | 0 | 0 | 0.9928 Ref |
| OX335370 | Unassigned | Unassigned | Unassigned | 972_0   | Clustered           | 99 VC_972_0  | 99  | 0.9113 | 1          |  | 0.9113 | 0 | 0 | 0 | 0.9928 Ref |
| OX335371 | Unassigned | Unassigned | Unassigned | 972_0   | Clustered           | 99 VC_972_0  | 99  | 0.9113 | 1          |  | 0.9113 | 0 | 0 | 0 | 0.9928 Ref |
| OX335375 | Unassigned | Unassigned | Unassigned | 848_0   | Clustered           | 124 VC_848_0 | 124 | 0.9484 | 1          |  | 0.9484 | 0 | 0 | 0 | 1 Ref      |
| OX335376 | Unassigned | Unassigned | Unassigned | 848_0   | Clustered           | 124 VC_848_0 | 124 | 0.9484 | 1          |  | 0.9484 | 0 | 0 | 0 | 1 Ref      |
| OX335377 | Unassigned | Unassigned | Unassigned | 848_0   | Clustered           | 124 VC_848_0 | 124 | 0.9484 | 1          |  | 0.9484 | 0 | 0 | 0 | 1 Ref      |
| OX335378 | Unassigned | Unassigned | Unassigned | 401_0   | Clustered           | 4 VC_401_0   | 4   | 0.0343 | 0.99998813 |  | 0.0343 | 0 | 0 | 0 | 1 Ref      |
| OX335379 | Unassigned | Unassigned | Unassigned | 113_0   | Clustered           | 91 VC_113_0  | 91  | 0.9584 | 1          |  | 0.9584 | 0 | 0 | 0 | 1 Ref      |
| OX335380 | Unassigned | Unassigned | Unassigned | 972_0   | Clustered           | 99 VC_972_0  | 99  | 0.9113 | 1          |  | 0.9113 | 0 | 0 | 0 | 0.9928 Ref |
| OX335381 | Unassigned | Unassigned | Unassigned | 972_0   | Clustered           | 99 VC_972_0  | 99  | 0.9113 | 1          |  | 0.9113 | 0 | 0 | 0 | 0.9928 Ref |
| OX335382 | Unassigned | Unassigned | Unassigned | 466_0   | Clustered           | 66 VC_466_0  | 66  | 0.9246 | 1          |  | 0.9246 | 0 | 0 | 0 | 1 Ref      |
| OX335383 | Unassigned | Unassigned | Unassigned | 972_0   | Clustered           | 99 VC_972_0  | 99  | 0.9113 | 1          |  | 0.9113 | 0 | 0 | 0 | 0.9928 Ref |
| OX335384 | Unassigned | Unassigned | Unassigned | 972_0   | Clustered           | 99 VC_972_0  | 99  | 0.9113 | 1          |  | 0.9113 | 0 | 0 | 0 | 0.9928 Ref |
| OX335385 | Unassigned | Unassigned | Unassigned | 972_0   | Clustered           | 99 VC_972_0  | 99  | 0.9113 | 1          |  | 0.9113 | 0 | 0 | 0 | 0.9928 Ref |
| OX335386 | Unassigned | Unassigned | Unassigned | 972_0   | Clustered           | 99 VC_972_0  | 99  | 0.9113 | 1          |  | 0.9113 | 0 | 0 | 0 | 0.9928 Ref |
| OX335387 | Unassigned | Unassigned | Unassigned | 972_0   | Clustered           | 99 VC_972_0  | 99  | 0.9113 | 1          |  | 0.9113 | 0 | 0 | 0 | 0.9928 Ref |
| OX335388 | Unassigned | Unassigned | Unassigned | 972_0   | Clustered           | 99 VC_972_0  | 99  | 0.9113 | 1          |  | 0.9113 | 0 | 0 | 0 | 0.9928 Ref |
| OX335389 | Unassigned | Unassigned | Unassigned | 848_0   | Clustered           | 124 VC_848_0 | 124 | 0.9484 | 1          |  | 0.9484 | 0 | 0 | 0 | 1 Ref      |
| OX335390 | Unassigned | Unassigned | Unassigned | 848_0   | Clustered           | 124 VC_848_0 | 124 | 0.9484 | 1          |  | 0.9484 | 0 | 0 | 0 | 1 Ref      |
| OX335391 | Unassigned | Unassigned | Unassigned | 972_0   | Clustered           | 99 VC_972_0  | 99  | 0.9113 | 1          |  | 0.9113 | 0 | 0 | 0 | 0.9928 Ref |



|               |            |            |            |        |                     |              |     |        |            |        |   |   |   |             |
|---------------|------------|------------|------------|--------|---------------------|--------------|-----|--------|------------|--------|---|---|---|-------------|
| OX335392      | Unassigned | Unassigned | Unassigned | 848_0  | Clustered           | 124 VC_848_0 | 124 | 0.9484 | 1          | 0.9484 | 0 | 0 | 0 | 1 Ref       |
| OX335393      | Unassigned | Unassigned | Unassigned | 972_0  | Clustered           | 99 VC_972_0  | 99  | 0.9113 | 1          | 0.9113 | 0 | 0 | 0 | 0.9928 Ref  |
| OX335394      | Unassigned | Unassigned | Unassigned | 848_0  | Clustered           | 124 VC_848_0 | 124 | 0.9484 | 1          | 0.9484 | 0 | 0 | 0 | 1 Ref       |
| OX335395      | Unassigned | Unassigned | Unassigned | 971_0  | Clustered           | 40 VC_971_0  | 40  | 0.6793 | 1          | 0.6793 | 0 | 0 | 0 | 0.9359 Ref  |
| OX335396      | Unassigned | Unassigned | Unassigned | 686_0  | Clustered           | 25 VC_686_0  | 25  | 0.5501 | 1          | 0.5501 | 0 | 0 | 0 | 0.96 Ref    |
| OX335398      | Unassigned | Unassigned | Unassigned | 848_0  | Clustered           | 124 VC_848_0 | 124 | 0.9484 | 1          | 0.9484 | 0 | 0 | 0 | 1 Ref       |
| OX335400      | Unassigned | Unassigned | Unassigned | 972_0  | Clustered           | 99 VC_972_0  | 99  | 0.9113 | 1          | 0.9113 | 0 | 0 | 0 | 0.9928 Ref  |
| OX335401      | Unassigned | Unassigned | Unassigned | 848_0  | Clustered           | 124 VC_848_0 | 124 | 0.9484 | 1          | 0.9484 | 0 | 0 | 0 | 1 Ref       |
| OX335402      | Unassigned | Unassigned | Unassigned | 134_2  | Clustered           | 17 VC_134_2  | 17  | 0.1715 | 1          | 0.1715 | 0 | 0 | 0 | 0.9853 Ref  |
| OX335403      | Unassigned | Unassigned | Unassigned | 134_2  | Clustered           | 17 VC_134_2  | 17  | 0.1715 | 1          | 0.1715 | 0 | 0 | 0 | 0.9853 Ref  |
| OX335404      | Unassigned | Unassigned | Unassigned | 972_0  | Clustered           | 99 VC_972_0  | 99  | 0.9113 | 1          | 0.9113 | 0 | 0 | 0 | 0.9928 Ref  |
| OX335405      | Unassigned | Unassigned | Unassigned | 134_2  | Clustered           | 17 VC_134_2  | 17  | 0.1715 | 1          | 0.1715 | 0 | 0 | 0 | 0.9853 Ref  |
| OX335407      | Unassigned | Unassigned | Unassigned | 686_0  | Clustered           | 25 VC_686_0  | 25  | 0.5501 | 1          | 0.5501 | 0 | 0 | 0 | 0.96 Ref    |
| OX335408      | Unassigned | Unassigned | Unassigned | 848_0  | Clustered           | 124 VC_848_0 | 124 | 0.9484 | 1          | 0.9484 | 0 | 0 | 0 | 1 Ref       |
| OX335409      | Unassigned | Unassigned | Unassigned | 848_0  | Clustered           | 124 VC_848_0 | 124 | 0.9484 | 1          | 0.9484 | 0 | 0 | 0 | 1 Ref       |
| OX335410      | Unassigned | Unassigned | Unassigned | 971_0  | Clustered           | 40 VC_971_0  | 40  | 0.6793 | 1          | 0.6793 | 0 | 0 | 0 | 0.9359 Ref  |
| OX335411      | Unassigned | Unassigned | Unassigned | 972_0  | Clustered           | 99 VC_972_0  | 99  | 0.9113 | 1          | 0.9113 | 0 | 0 | 0 | 0.9928 Ref  |
| OX335412      | Unassigned | Unassigned | Unassigned | 972_0  | Clustered           | 99 VC_972_0  | 99  | 0.9113 | 1          | 0.9113 | 0 | 0 | 0 | 0.9928 Ref  |
| OX335413      | Unassigned | Unassigned | Unassigned | 848_0  | Clustered           | 124 VC_848_0 | 124 | 0.9484 | 1          | 0.9484 | 0 | 0 | 0 | 1 Ref       |
| OX335414      | Unassigned | Unassigned | Unassigned | 848_0  | Clustered           | 124 VC_848_0 | 124 | 0.9484 | 1          | 0.9484 | 0 | 0 | 0 | 1 Ref       |
| OX335416      | Unassigned | Unassigned | Unassigned | 134_2  | Clustered           | 17 VC_134_2  | 17  | 0.1715 | 1          | 0.1715 | 0 | 0 | 0 | 0.9853 Ref  |
| OX335417      | Unassigned | Unassigned | Unassigned | 972_0  | Clustered           | 99 VC_972_0  | 99  | 0.9113 | 1          | 0.9113 | 0 | 0 | 0 | 0.9928 Ref  |
| OX335418      | Unassigned | Unassigned | Unassigned | 848_0  | Clustered           | 124 VC_848_0 | 124 | 0.9484 | 1          | 0.9484 | 0 | 0 | 0 | 1 Ref       |
| OX335419      | Unassigned | Unassigned | Unassigned | 398_0  | Clustered           | 51 VC_398_0  | 51  | 0.8741 | 1          | 0.8741 | 0 | 0 | 0 | 1 Ref       |
| OX335420      | Unassigned | Unassigned | Unassigned | 398_0  | Clustered           | 51 VC_398_0  | 51  | 0.8741 | 1          | 0.8741 | 0 | 0 | 0 | 1 Ref       |
| OX335421      | Unassigned | Unassigned | Unassigned | 972_0  | Clustered           | 99 VC_972_0  | 99  | 0.9113 | 1          | 0.9113 | 0 | 0 | 0 | 0.9928 Ref  |
| OX335422      | Unassigned | Unassigned | Unassigned | 972_0  | Clustered           | 99 VC_972_0  | 99  | 0.9113 | 1          | 0.9113 | 0 | 0 | 0 | 0.9928 Ref  |
| OX335423      | Unassigned | Unassigned | Unassigned | 972_0  | Clustered           | 99 VC_972_0  | 99  | 0.9113 | 1          | 0.9113 | 0 | 0 | 0 | 0.9928 Ref  |
| OX335426      | Unassigned | Unassigned | Unassigned | 848_0  | Clustered           | 124 VC_848_0 | 124 | 0.9484 | 1          | 0.9484 | 0 | 0 | 0 | 1 Ref       |
| OX335427      | Unassigned | Unassigned | Unassigned | 848_0  | Clustered           | 124 VC_848_0 | 124 | 0.9484 | 1          | 0.9484 | 0 | 0 | 0 | 1 Ref       |
| OX335428      | Unassigned | Unassigned | Unassigned | 113_0  | Clustered           | 91 VC_113_0  | 91  | 0.9584 | 1          | 0.9584 | 0 | 0 | 0 | 1 Ref       |
| OX335429      | Unassigned | Unassigned | Unassigned | 972_0  | Clustered           | 99 VC_972_0  | 99  | 0.9113 | 1          | 0.9113 | 0 | 0 | 0 | 0.9928 Ref  |
| OX335430      | Unassigned | Unassigned | Unassigned | 972_0  | Clustered           | 99 VC_972_0  | 99  | 0.9113 | 1          | 0.9113 | 0 | 0 | 0 | 0.9928 Ref  |
| OX335431      | Unassigned | Unassigned | Unassigned | 398_0  | Clustered           | 51 VC_398_0  | 51  | 0.8741 | 1          | 0.8741 | 0 | 0 | 0 | 1 Ref       |
| OX335432      | Unassigned | Unassigned | Unassigned | 972_0  | Clustered           | 99 VC_972_0  | 99  | 0.9113 | 1          | 0.9113 | 0 | 0 | 0 | 0.9928 Ref  |
| OX335433      | Unassigned | Unassigned | Unassigned | 848_0  | Clustered           | 124 VC_848_0 | 124 | 0.9484 | 1          | 0.9484 | 0 | 0 | 0 | 1 Ref       |
| OX335434      | Unassigned | Unassigned | Unassigned | 398_0  | Clustered           | 51 VC_398_0  | 51  | 0.8741 | 1          | 0.8741 | 0 | 0 | 0 | 1 Ref       |
| OX335435      | Unassigned | Unassigned | Unassigned | 972_0  | Clustered           | 99 VC_972_0  | 99  | 0.9113 | 1          | 0.9113 | 0 | 0 | 0 | 0.9928 Ref  |
| OX335437      | Unassigned | Unassigned | Unassigned | 398_0  | Clustered           | 51 VC_398_0  | 51  | 0.8741 | 1          | 0.8741 | 0 | 0 | 0 | 1 Ref       |
| OX335438      | Unassigned | Unassigned | Unassigned | 848_0  | Clustered           | 124 VC_848_0 | 124 | 0.9484 | 1          | 0.9484 | 0 | 0 | 0 | 1 Ref       |
| OX335439      | Unassigned | Unassigned | Unassigned | 972_0  | Clustered           | 99 VC_972_0  | 99  | 0.9113 | 1          | 0.9113 | 0 | 0 | 0 | 0.9928 Ref  |
| OX335440      | Unassigned | Unassigned | Unassigned | 848_0  | Clustered           | 124 VC_848_0 | 124 | 0.9484 | 1          | 0.9484 | 0 | 1 | 0 | 1 Ref       |
| OX335441      | Unassigned | Unassigned | Unassigned | 401_0  | Clustered           | 4 VC_401_0   | 4   | 0.0343 | 0.99998813 | 0.0343 | 0 | 0 | 0 | 1 Ref       |
| OX335443      | Unassigned | Unassigned | Unassigned | 848_0  | Clustered           | 124 VC_848_0 | 124 | 0.9484 | 1          | 0.9484 | 0 | 0 | 0 | 1 Ref       |
| PF3COMN       | Unassigned | Unassigned | Unassigned | 1551_0 | Clustered           | 2 VC_1551_0  | 2   | 1      | 1          | 1      | 0 | 0 | 0 | 1 Ref       |
| PF3COMNY      | Unassigned | Unassigned | Unassigned | 1551_0 | Clustered           | 2 VC_1551_0  | 2   | 1      | 1          | 1      | 0 | 0 | 0 | 1 Ref       |
| PFDCG         | Unassigned | Unassigned | Unassigned | 62_0   | Clustered           | 12 VC_62_0   | 12  | 0.7624 | 1          | 0.7624 | 0 | 0 | 0 | 1 Ref       |
| PX1CG         | Unassigned | Unassigned | Unassigned | 310_0  | Clustered           | 155 VC_310_0 | 155 | 0.9979 | 1          | 0.9979 | 0 | 0 | 0 | 1 Ref       |
| PZACG         | Unassigned | Unassigned | Unassigned | 842_0  | Clustered           | 14 VC_842_0  | 14  | 0.6581 | 1          | 0.6581 | 0 | 0 | 0 | 1 Ref       |
| S10_vf_120738 | Unassigned | Unassigned | Unassigned | 491_3  | Clustered/Singleton | 1 VC_491_3   | 1   | 0      | 1          | 0      | 0 | 0 | 0 | 1 SHHC      |
| S10_vf_18671  | Unassigned | Unassigned | Unassigned | 855_0  | Clustered           | 12 VC_855_0  | 12  | 0.6068 | 1          | 0.6068 | 0 | 0 | 0 | 1 SHHC      |
| S10_vf_24791  | Unassigned | Unassigned | Unassigned | 723_0  | Clustered           | 20 VC_723_0  | 20  | 0.7344 | 1          | 0.7344 | 0 | 0 | 0 | 0.7 SHHC    |
| S10_vf_25241  | Unassigned | Unassigned | Unassigned | 1558_0 | Clustered           | 3 VC_1558_0  | 3   | 0.9429 | 0.92554266 | 0.8727 | 0 | 0 | 0 | 1 SHHC      |
| S10_vf_3644   | Unassigned | Unassigned | Unassigned | 519_7  | Clustered           | 2 VC_519_7   | 2   | 0.0454 | 0.95144654 | 0.0432 | 0 | 0 | 0 | 1 SHHC      |
| S10_vf_36880  | Unassigned | Unassigned | Unassigned | 693_0  | Clustered           | 4 VC_693_0   | 4   | 0.3    | 0.99997992 | 0.3    | 0 | 0 | 0 | 1 SHHC      |
| S10_vf_43964  | Unassigned | Unassigned | Unassigned | 1525_2 | Clustered/Singleton | 1 VC_1525_2  | 1   | 0      | 1          | 0      | 0 | 0 | 0 | 1 SHHC      |
| S10_vf_64371  | Unassigned | Unassigned | Unassigned | 1564_0 | Clustered           | 5 VC_1564_0  | 5   | 1      | 1          | 1      | 0 | 0 | 0 | 1 SHHC      |
| S10_vf_80712  | Unassigned | Unassigned | Unassigned | 219_0  | Clustered           | 2 VC_219_0   | 2   | 0.232  | 0.94855438 | 0.22   | 0 | 0 | 0 | 1 SHHC      |
| S10_vs_120489 | Unassigned | Unassigned | Unassigned | 1566_0 | Clustered           | 3 VC_1566_0  | 3   | 0.9617 | 0.81445332 | 0.7833 | 0 | 0 | 0 | 1 SHHC      |
| S10_vs_120541 | Unassigned | Unassigned | Unassigned | 1567_0 | Clustered           | 4 VC_1567_0  | 4   | 0.1809 | 0.99997266 | 0.1808 | 0 | 0 | 0 | 0.8333 SHHC |
| S10_vs_14557  | Unassigned | Unassigned | Unassigned | 1062_0 | Clustered           | 2 VC_1062_0  | 2   | 0.4754 | 0.94858067 | 0.4509 | 0 | 0 | 0 | 1 SHHC      |
| S10_vs_18901  | Unassigned | Unassigned | Unassigned | 1291_0 | Clustered           | 18 VC_1291_0 | 18  | 0.5095 | 1          | 0.5095 | 0 | 0 | 0 | 0.9542 SHHC |
| S10_vs_2538   | Unassigned | Unassigned | Unassigned | 658_0  | Clustered           | 3 VC_658_0   | 3   | 0.1319 | 0.99006448 | 0.1305 | 0 | 0 | 0 | 0.6667 SHHC |
| S10_vs_26365  | Unassigned | Unassigned | Unassigned | 1085_1 | Clustered           | 19 VC_1085_1 | 19  | 0.5328 | 1          | 0.5328 | 0 | 0 | 0 | 0.8947 SHHC |
| S10_vs_35854  | Unassigned | Unassigned | Unassigned | 1527_0 | Clustered           | 2 VC_1527_0  | 2   | 0.3636 | 0.94251254 | 0.3427 | 0 | 0 | 0 | 1 SHHC      |
| S10_vs_36407  | Unassigned | Unassigned | Unassigned | 1578_0 | Clustered           | 2 VC_1578_0  | 2   | 0.2609 | 0.94251254 | 0.2459 | 0 | 0 | 0 | 1 SHHC      |
| S10_vs_36598  | Unassigned | Unassigned | Unassigned | 1579_0 | Clustered           | 2 VC_1579_0  | 2   | 0.6144 | 0.93555746 | 0.5748 | 0 | 0 | 0 | 1 SHHC      |
| S10_vs_37379  | Unassigned | Unassigned | Unassigned | 1055_2 | Clustered/Singleton | 1 VC_1055_2  | 1   | 0      | 1          | 0      | 0 | 0 | 0 | 1 SHHC      |
| S10_vs_43473  | Unassigned | Unassigned | Unassigned | 1334_0 | Clustered           | 7 VC_1334_0  | 7   | 0.6918 | 1          | 0.6918 | 0 | 0 | 0 | 1 SHHC      |
| S10_vs_58014  | Unassigned | Unassigned | Unassigned | 695_0  | Clustered           | 17 VC_695_0  | 17  | 0.7188 | 1          | 0.7188 | 0 | 0 | 0 | 0.9044 SHHC |
| S10_vs_62776  | Unassigned | Unassigned | Unassigned | 1525_0 | Clustered/Singleton | 1 VC_1525_0  | 1   | 0      | 1          | 0      | 0 | 0 | 0 | 1 SHHC      |
| S10_vs_67471  | Unassigned | Unassigned | Unassigned | 950_0  | Clustered           | 5 VC_950_0   | 5   | 0.5772 | 0.99999979 | 0.5772 | 0 | 0 | 0 | 1 SHHC      |
| S10_vs_71900  | Unassigned | Unassigned | Unassigned | 1576_0 | Clustered           | 5 VC_1576_0  | 5   | 0.7068 | 0.99999939 | 0.7068 | 0 | 0 | 0 | 1 SHHC      |
| S10_vs_77004  | Unassigned | Unassigned | Unassigned | 922_0  | Clustered/Singleton | 1 VC_922_0   | 1   | 0      | 1          | 0      | 0 | 0 | 0 | 1 SHHC      |
| S11_vf_104033 | Unassigned | Unassigned | Unassigned | 963_1  | Clustered/Singleton | 1 VC_963_1   | 1   | 0      | 1          | 0      | 0 | 0 | 0 | 1 ME        |
| S11_vf_104035 | Unassigned | Unassigned | Unassigned | 519_0  | Clustered           | 2 VC_519_0   | 2   | 0.0496 | 0.95385383 | 0.0474 | 0 | 0 | 0 | 1 ME        |
| S11_vf_104044 | Unassigned | Unassigned | Unassigned | 1054_0 | Clustered           | 5 VC_1054_0  | 5   | 0.1894 | 0.99999402 | 0.1894 | 0 | 0 | 0 | 1 ME        |
| S11_vf_104048 | Unassigned | Unassigned | Unassigned | 750_0  | Clustered           | 2 VC_750_0   | 2   | 0.9721 | 0.5        | 0.4861 | 0 | 0 | 0 | 1 ME        |
| S11_vf_104052 | Unassigned | Unassigned | Unassigned | 759_0  | Clustered           | 2 VC_759_0   | 2   | 0.164  | 0.95057364 | 0.1559 | 0 | 0 | 0 | 1 ME        |
| S11_vf_104059 | Unassigned | Unassigned | Unassigned | 691_0  | Clustered           | 18 VC_691_0  | 18  | 0.6865 | 1          | 0.6865 | 0 | 0 | 0 | 0.9477 ME   |
| S11_vf_104070 | Unassigned | Unassigned | Unassigned | 150_0  | Clustered           | 3 VC_150_0   | 3   | 0.2193 | 0.99845588 | 0.2189 | 0 | 0 | 0 | 1 ME        |



|               |            |            |            |        |                     |              |    |        |            |        |   |   |   |             |
|---------------|------------|------------|------------|--------|---------------------|--------------|----|--------|------------|--------|---|---|---|-------------|
| S11_vf_104071 | Unassigned | Unassigned | Unassigned | 1045_0 | Clustered           | 2 VC_1045_0  | 2  | 0.5958 | 0.92921057 | 0.5536 | 0 | 0 | 0 | 1 ME        |
| S11_vf_10907  | Unassigned | Unassigned | Unassigned | 759_0  | Clustered           | 2 VC_759_0   | 2  | 0.164  | 0.95057364 | 0.1559 | 0 | 0 | 0 | 1 ME        |
| S11_vf_13033  | Unassigned | Unassigned | Unassigned | 1085_1 | Clustered           | 19 VC_1085_1 | 19 | 0.5328 | 1          | 0.5328 | 0 | 0 | 0 | 0.8947 ME   |
| S11_vf_27845  | Unassigned | Unassigned | Unassigned | 1564_0 | Clustered           | 5 VC_1564_0  | 5  | 1      | 1          | 1      | 0 | 0 | 0 | 1 ME        |
| S11_vf_28515  | Unassigned | Unassigned | Unassigned | 219_0  | Clustered           | 2 VC_219_0   | 2  | 0.232  | 0.94855438 | 0.22   | 0 | 0 | 0 | 1 ME        |
| S11_vf_28645  | Unassigned | Unassigned | Unassigned | 1558_0 | Clustered           | 3 VC_1558_0  | 3  | 0.9429 | 0.92554266 | 0.8727 | 0 | 0 | 0 | 1 ME        |
| S11_vf_34224  | Unassigned | Unassigned | Unassigned | 150_0  | Clustered           | 3 VC_150_0   | 3  | 0.2193 | 0.99845588 | 0.2189 | 0 | 0 | 0 | 1 ME        |
| S11_vf_3790   | Unassigned | Unassigned | Unassigned | 490_0  | Clustered/Singleton | 1 VC_490_0   | 1  | 0      | 1          | 0      | 0 | 0 | 0 | 1 ME        |
| S11_vf_43997  | Unassigned | Unassigned | Unassigned | 691_0  | Clustered           | 18 VC_691_0  | 18 | 0.6865 | 1          | 0.6865 | 0 | 0 | 0 | 0.9477 ME   |
| S11_vf_47632  | Unassigned | Unassigned | Unassigned | 1289_0 | Clustered           | 9 VC_1289_0  | 9  | 0.4889 | 1          | 0.4889 | 0 | 0 | 0 | 0.7222 ME   |
| S11_vf_66160  | Unassigned | Unassigned | Unassigned | 1256_0 | Clustered           | 3 VC_1256_0  | 3  | 0.7864 | 0.99722149 | 0.7842 | 0 | 0 | 0 | 1 ME        |
| S11_vf_66522  | Unassigned | Unassigned | Unassigned | 1435_0 | Clustered           | 2 VC_1435_0  | 2  | 0.7818 | 0.9262493  | 0.7242 | 0 | 0 | 0 | 1 ME        |
| S11_vf_68693  | Unassigned | Unassigned | Unassigned | 1559_0 | Clustered           | 2 VC_1559_0  | 2  | 0.0565 | 0.71836996 | 0.0406 | 0 | 0 | 0 | 1 ME        |
| S11_vf_70015  | Unassigned | Unassigned | Unassigned | 951_2  | Clustered/Singleton | 1 VC_951_2   | 1  | 0      | 1          | 0      | 0 | 0 | 0 | 1 ME        |
| S11_vf_84303  | Unassigned | Unassigned | Unassigned | 1552_0 | Clustered           | 9 VC_1552_0  | 9  | 0.5828 | 1          | 0.5828 | 0 | 0 | 0 | 0.8056 ME   |
| S11_vf_92391  | Unassigned | Unassigned | Unassigned | 1585_0 | Clustered           | 3 VC_1585_0  | 3  | 0.9814 | 0.81445332 | 0.7993 | 0 | 0 | 0 | 1 ME        |
| S11_vf_95067  | Unassigned | Unassigned | Unassigned | 1552_0 | Clustered           | 9 VC_1552_0  | 9  | 0.5828 | 1          | 0.5828 | 0 | 0 | 0 | 0.8056 ME   |
| S11_vs_10172  | Unassigned | Unassigned | Unassigned | 723_0  | Clustered           | 20 VC_723_0  | 20 | 0.7344 | 1          | 0.7344 | 0 | 0 | 0 | 0.7 ME      |
| S11_vs_104032 | Unassigned | Unassigned | Unassigned | 940_0  | Clustered           | 2 VC_940_0   | 2  | 0.4996 | 0.9262493  | 0.4628 | 0 | 0 | 0 | 1 ME        |
| S11_vs_104038 | Unassigned | Unassigned | Unassigned | 667_0  | Clustered           | 12 VC_667_0  | 12 | 0.2907 | 0.99999999 | 0.2907 | 0 | 0 | 0 | 1 ME        |
| S11_vs_104041 | Unassigned | Unassigned | Unassigned | 669_0  | Clustered           | 2 VC_669_0   | 2  | 0.1292 | 0.95214234 | 0.123  | 0 | 0 | 0 | 1 ME        |
| S11_vs_104047 | Unassigned | Unassigned | Unassigned | 643_0  | Clustered           | 2 VC_643_0   | 2  | 0.0123 | 0.61707629 | 0.0076 | 0 | 0 | 0 | 1 ME        |
| S11_vs_104053 | Unassigned | Unassigned | Unassigned | 946_0  | Clustered           | 7 VC_946_0   | 7  | 0.8307 | 0.99999953 | 0.8307 | 0 | 0 | 0 | 1 ME        |
| S11_vs_104054 | Unassigned | Unassigned | Unassigned | 1567_0 | Clustered           | 4 VC_1567_0  | 4  | 0.1809 | 0.99997266 | 0.1808 | 0 | 0 | 0 | 0.8333 ME   |
| S11_vs_104064 | Unassigned | Unassigned | Unassigned | 1085_1 | Clustered           | 19 VC_1085_1 | 19 | 0.5328 | 1          | 0.5328 | 0 | 0 | 0 | 0.8947 ME   |
| S11_vs_11267  | Unassigned | Unassigned | Unassigned | 778_0  | Clustered           | 13 VC_778_0  | 13 | 0.2581 | 1          | 0.2581 | 0 | 0 | 0 | 0.9359 ME   |
| S11_vs_11994  | Unassigned | Unassigned | Unassigned | 732_0  | Clustered           | 3 VC_732_0   | 3  | 0.1816 | 0.99843576 | 0.1813 | 0 | 0 | 0 | 1 ME        |
| S11_vs_14882  | Unassigned | Unassigned | Unassigned | 1570_0 | Clustered           | 7 VC_1570_0  | 7  | 0.3986 | 0.99999956 | 0.3986 | 0 | 0 | 0 | 1 ME        |
| S11_vs_1937   | Unassigned | Unassigned | Unassigned | 951_0  | Clustered           | 2 VC_951_0   | 2  | 0.2138 | 0.95011428 | 0.2031 | 0 | 0 | 0 | 1 ME        |
| S11_vs_19892  | Unassigned | Unassigned | Unassigned | 723_0  | Clustered           | 20 VC_723_0  | 20 | 0.7344 | 1          | 0.7344 | 0 | 0 | 0 | 0.7 ME      |
| S11_vs_23188  | Unassigned | Unassigned | Unassigned | 1559_0 | Clustered           | 2 VC_1559_0  | 2  | 0.0565 | 0.71836996 | 0.0406 | 0 | 0 | 0 | 1 ME        |
| S11_vs_23357  | Unassigned | Unassigned | Unassigned | 723_0  | Clustered           | 20 VC_723_0  | 20 | 0.7344 | 1          | 0.7344 | 0 | 0 | 0 | 0.7 ME      |
| S11_vs_26767  | Unassigned | Unassigned | Unassigned | 152_0  | Clustered           | 10 VC_152_0  | 10 | 0.6545 | 1          | 0.6545 | 0 | 0 | 0 | 0.8889 ME   |
| S11_vs_30739  | Unassigned | Unassigned | Unassigned | 1289_0 | Clustered           | 9 VC_1289_0  | 9  | 0.4889 | 1          | 0.4889 | 0 | 0 | 0 | 0.7222 ME   |
| S11_vs_3277   | Unassigned | Unassigned | Unassigned | 695_0  | Clustered           | 17 VC_695_0  | 17 | 0.7188 | 1          | 0.7188 | 0 | 0 | 0 | 0.9044 ME   |
| S11_vs_34137  | Unassigned | Unassigned | Unassigned | 779_0  | Clustered           | 19 VC_779_0  | 19 | 0.5105 | 1          | 0.5105 | 0 | 0 | 0 | 0.924 ME    |
| S11_vs_37666  | Unassigned | Unassigned | Unassigned | 1258_0 | Clustered           | 24 VC_1258_0 | 24 | 0.4451 | 1          | 0.4451 | 0 | 0 | 0 | 1 ME        |
| S11_vs_40945  | Unassigned | Unassigned | Unassigned | 723_0  | Clustered           | 20 VC_723_0  | 20 | 0.7344 | 1          | 0.7344 | 0 | 0 | 0 | 0.7 ME      |
| S11_vs_41107  | Unassigned | Unassigned | Unassigned | 151_0  | Clustered           | 17 VC_151_0  | 17 | 0.4863 | 1          | 0.4863 | 0 | 0 | 0 | 0.9779 ME   |
| S11_vs_42927  | Unassigned | Unassigned | Unassigned | 649_1  | Clustered           | 14 VC_649_1  | 14 | 0.5226 | 1          | 0.5226 | 0 | 0 | 0 | 0.8352 ME   |
| S11_vs_5077   | Unassigned | Unassigned | Unassigned | 5_0    | Clustered           | 27 VC_5_0    | 27 | 0.9599 | 1          | 0.9599 | 0 | 0 | 0 | 1 ME        |
| S11_vs_52577  | Unassigned | Unassigned | Unassigned | 1288_0 | Clustered           | 7 VC_1288_0  | 7  | 0.9846 | 0.99997693 | 0.9846 | 0 | 0 | 0 | 1 ME        |
| S11_vs_58702  | Unassigned | Unassigned | Unassigned | 151_0  | Clustered           | 17 VC_151_0  | 17 | 0.4863 | 1          | 0.4863 | 0 | 0 | 0 | 0.9779 ME   |
| S11_vs_58930  | Unassigned | Unassigned | Unassigned | 695_0  | Clustered           | 17 VC_695_0  | 17 | 0.7188 | 1          | 0.7188 | 0 | 0 | 0 | 0.9044 ME   |
| S11_vs_62573  | Unassigned | Unassigned | Unassigned | 1256_0 | Clustered           | 3 VC_1256_0  | 3  | 0.7864 | 0.99722149 | 0.7842 | 0 | 0 | 0 | 1 ME        |
| S11_vs_6458   | Unassigned | Unassigned | Unassigned | 1595_0 | Clustered           | 2 VC_1595_0  | 2  | 0.48   | 0.85557782 | 0.4107 | 0 | 0 | 0 | 1 ME        |
| S11_vs_68151  | Unassigned | Unassigned | Unassigned | 1085_1 | Clustered           | 19 VC_1085_1 | 19 | 0.5328 | 1          | 0.5328 | 0 | 0 | 0 | 0.8947 ME   |
| S11_vs_75554  | Unassigned | Unassigned | Unassigned | 1264_0 | Clustered/Singleton | 1 VC_1264_0  | 1  | 0      | 1          | 0      | 0 | 0 | 0 | 1 ME        |
| S11_vs_76784  | Unassigned | Unassigned | Unassigned | 558_0  | Clustered           | 2 VC_558_0   | 2  | 0.0266 | 0.94732133 | 0.0252 | 0 | 0 | 0 | 1 ME        |
| S11_vs_79275  | Unassigned | Unassigned | Unassigned | 1570_0 | Clustered           | 7 VC_1570_0  | 7  | 0.3986 | 0.99999956 | 0.3986 | 0 | 0 | 0 | 1 ME        |
| S11_vs_81775  | Unassigned | Unassigned | Unassigned | 667_0  | Clustered           | 12 VC_667_0  | 12 | 0.2907 | 0.99999999 | 0.2907 | 0 | 0 | 0 | 1 ME        |
| S11_vs_8456   | Unassigned | Unassigned | Unassigned | 349_0  | Clustered           | 5 VC_349_0   | 5  | 0.191  | 0.97099341 | 0.1855 | 0 | 0 | 0 | 1 ME        |
| S11_vs_84627  | Unassigned | Unassigned | Unassigned | 1596_0 | Clustered           | 2 VC_1596_0  | 2  | 0.5586 | 0.85557782 | 0.478  | 0 | 0 | 0 | 1 ME        |
| S11_vs_84848  | Unassigned | Unassigned | Unassigned | 695_0  | Clustered           | 17 VC_695_0  | 17 | 0.7188 | 1          | 0.7188 | 0 | 0 | 0 | 0.9044 ME   |
| S11_vs_93101  | Unassigned | Unassigned | Unassigned | 967_0  | Clustered           | 5 VC_967_0   | 5  | 0.992  | 0.97937098 | 0.9715 | 0 | 0 | 0 | 1 ME        |
| S11_vs_98193  | Unassigned | Unassigned | Unassigned | 695_0  | Clustered           | 17 VC_695_0  | 17 | 0.7188 | 1          | 0.7188 | 0 | 0 | 0 | 0.9044 ME   |
| S12_vf_10887  | Unassigned | Unassigned | Unassigned | 1597_0 | Clustered           | 3 VC_1597_0  | 3  | 1      | 1          | 1      | 0 | 0 | 0 | 1 SHHC      |
| S12_vf_128794 | Unassigned | Unassigned | Unassigned | 1552_0 | Clustered           | 9 VC_1552_0  | 9  | 0.5828 | 1          | 0.5828 | 0 | 0 | 0 | 0.8056 SHHC |
| S12_vf_169796 | Unassigned | Unassigned | Unassigned | 491_0  | Clustered           | 2 VC_491_0   | 2  | 0.1386 | 0.94453592 | 0.1309 | 0 | 0 | 0 | 1 SHHC      |
| S12_vf_173208 | Unassigned | Unassigned | Unassigned | 1274_0 | Clustered           | 6 VC_1274_0  | 6  | 0.494  | 1          | 0.494  | 0 | 0 | 0 | 1 SHHC      |
| S12_vf_174374 | Unassigned | Unassigned | Unassigned | 1576_0 | Clustered           | 5 VC_1576_0  | 5  | 0.7068 | 0.99999939 | 0.7068 | 0 | 0 | 0 | 1 SHHC      |
| S12_vf_176437 | Unassigned | Unassigned | Unassigned | 1261_0 | Clustered           | 14 VC_1261_0 | 14 | 0.3712 | 1          | 0.3712 | 0 | 0 | 0 | 1 SHHC      |
| S12_vf_181024 | Unassigned | Unassigned | Unassigned | 1040_0 | Clustered           | 2 VC_1040_0  | 2  | 0.3919 | 0.94750719 | 0.3713 | 0 | 0 | 0 | 1 SHHC      |
| S12_vf_188819 | Unassigned | Unassigned | Unassigned | 490_3  | Clustered/Singleton | 1 VC_490_3   | 1  | 0      | 1          | 0      | 0 | 0 | 0 | 1 SHHC      |
| S12_vf_188822 | Unassigned | Unassigned | Unassigned | 1597_0 | Clustered           | 3 VC_1597_0  | 3  | 1      | 1          | 1      | 0 | 0 | 0 | 1 SHHC      |
| S12_vf_188824 | Unassigned | Unassigned | Unassigned | 1490_0 | Clustered           | 6 VC_1490_0  | 6  | 0.4379 | 1          | 0.4379 | 0 | 0 | 0 | 1 SHHC      |
| S12_vf_188830 | Unassigned | Unassigned | Unassigned | 1598_0 | Clustered           | 2 VC_1598_0  | 2  | 1      | 1          | 1      | 0 | 0 | 0 | 1 SHHC      |
| S12_vf_188838 | Unassigned | Unassigned | Unassigned | 1495_0 | Clustered           | 6 VC_1495_0  | 6  | 0.9829 | 0.98467288 | 0.9678 | 0 | 0 | 0 | 1 SHHC      |
| S12_vf_48278  | Unassigned | Unassigned | Unassigned | 439_0  | Clustered           | 3 VC_439_0   | 3  | 0.8601 | 0.98155579 | 0.8442 | 0 | 0 | 0 | 1 SHHC      |
| S12_vf_55175  | Unassigned | Unassigned | Unassigned | 1290_0 | Clustered           | 4 VC_1290_0  | 4  | 0.2185 | 0.99997703 | 0.2185 | 0 | 0 | 0 | 1 SHHC      |
| S12_vf_60224  | Unassigned | Unassigned | Unassigned | 950_0  | Clustered           | 5 VC_950_0   | 5  | 0.5772 | 0.99999979 | 0.5772 | 0 | 0 | 0 | 1 SHHC      |
| S12_vf_67909  | Unassigned | Unassigned | Unassigned | 221_0  | Clustered/Singleton | 1 VC_221_0   | 1  | 0      | 1          | 0      | 0 | 0 | 0 | 1 SHHC      |
| S12_vf_69136  | Unassigned | Unassigned | Unassigned | 950_0  | Clustered           | 5 VC_950_0   | 5  | 0.5772 | 0.99999979 | 0.5772 | 0 | 0 | 0 | 1 SHHC      |
| S12_vf_79666  | Unassigned | Unassigned | Unassigned | 1552_0 | Clustered           | 9 VC_1552_0  | 9  | 0.5828 | 1          | 0.5828 | 0 | 0 | 0 | 0.8056 SHHC |
| S12_vs_106329 | Unassigned | Unassigned | Unassigned | 779_0  | Clustered           | 19 VC_779_0  | 19 | 0.5105 | 1          | 0.5105 | 0 | 0 | 0 | 0.924 SHHC  |
| S12_vs_111815 | Unassigned | Unassigned | Unassigned | 1553_0 | Clustered           | 2 VC_1553_0  | 2  | 0.2354 | 0.94520071 | 0.2225 | 0 | 0 | 0 | 1 SHHC      |
| S12_vs_121913 | Unassigned | Unassigned | Unassigned | 1582_0 | Clustered           | 2 VC_1582_0  | 2  | 0.22   | 0.91237788 | 0.2007 | 0 | 0 | 0 | 1 SHHC      |
| S12_vs_123620 | Unassigned | Unassigned | Unassigned | 1295_0 | Clustered/Singleton | 1 VC_1295_0  | 1  | 0      | 1          | 0      | 0 | 0 | 0 | 1 SHHC      |
| S12_vs_137069 | Unassigned | Unassigned | Unassigned | 1601_0 | Clustered           | 2 VC_1601_0  | 2  | 0.7965 | 0.81445332 | 0.6487 | 0 | 0 | 0 | 1 SHHC      |
| S12_vs_138261 | Unassigned | Unassigned | Unassigned | 1583_0 | Clustered           | 3 VC_1583_0  | 3  | 0.6428 | 0.99188498 | 0.6375 | 0 | 0 | 0 | 1 SHHC      |
| S12_vs_141337 | Unassigned | Unassigned | Unassigned | 695_0  | Clustered           | 17 VC_695_0  | 17 | 0.7188 | 1          | 0.7188 | 0 | 0 | 0 | 0.9044 SHHC |



|               |            |            |            |        |                     |              |     |        |            |        |   |   |   |             |
|---------------|------------|------------|------------|--------|---------------------|--------------|-----|--------|------------|--------|---|---|---|-------------|
| S12_vs_14927  | Unassigned | Unassigned | Unassigned | 691_0  | Clustered           | 18 VC_691_0  | 18  | 0.6865 | 1          | 0.6865 | 0 | 0 | 0 | 0.9477 SHHC |
| S12_vs_150812 | Unassigned | Unassigned | Unassigned | 151_0  | Clustered           | 17 VC_151_0  | 17  | 0.4863 | 1          | 0.4863 | 0 | 0 | 0 | 0.9779 SHHC |
| S12_vs_151292 | Unassigned | Unassigned | Unassigned | 1526_0 | Clustered           | 3 VC_1526_0  | 3   | 0.6842 | 0.9969176  | 0.6821 | 0 | 0 | 0 | 1 SHHC      |
| S12_vs_163990 | Unassigned | Unassigned | Unassigned | 1085_1 | Clustered           | 19 VC_1085_1 | 19  | 0.5328 | 1          | 0.5328 | 0 | 0 | 0 | 0.8947 SHHC |
| S12_vs_172379 | Unassigned | Unassigned | Unassigned | 1477_1 | Clustered/Singleton | 1 VC_1477_1  | 1   | 0      | 1          | 0      | 0 | 0 | 0 | 1 SHHC      |
| S12_vs_183752 | Unassigned | Unassigned | Unassigned | 1261_0 | Clustered           | 14 VC_1261_0 | 14  | 0.3712 | 1          | 0.3712 | 0 | 0 | 0 | 1 SHHC      |
| S12_vs_183891 | Unassigned | Unassigned | Unassigned | 1603_0 | Clustered           | 2 VC_1603_0  | 2   | 1      | 1          | 1      | 0 | 0 | 0 | 1 SHHC      |
| S12_vs_188820 | Unassigned | Unassigned | Unassigned | 1553_0 | Clustered           | 2 VC_1553_0  | 2   | 0.2354 | 0.94520071 | 0.2225 | 0 | 0 | 0 | 1 SHHC      |
| S12_vs_188821 | Unassigned | Unassigned | Unassigned | 1085_1 | Clustered           | 19 VC_1085_1 | 19  | 0.5328 | 1          | 0.5328 | 0 | 0 | 0 | 0.8947 SHHC |
| S12_vs_188823 | Unassigned | Unassigned | Unassigned | 1566_0 | Clustered           | 3 VC_1566_0  | 3   | 0.9617 | 0.81445332 | 0.7833 | 0 | 0 | 0 | 1 SHHC      |
| S12_vs_188828 | Unassigned | Unassigned | Unassigned | 1568_0 | Clustered           | 2 VC_1568_0  | 2   | 0.3084 | 0.94887968 | 0.2927 | 0 | 0 | 0 | 1 SHHC      |
| S12_vs_188832 | Unassigned | Unassigned | Unassigned | 1161_0 | Clustered           | 16 VC_1161_0 | 16  | 0.4834 | 0.99999958 | 0.4834 | 0 | 0 | 0 | 1 SHHC      |
| S12_vs_188833 | Unassigned | Unassigned | Unassigned | 1274_0 | Clustered           | 6 VC_1274_0  | 6   | 0.494  | 1          | 0.494  | 0 | 0 | 0 | 1 SHHC      |
| S12_vs_23796  | Unassigned | Unassigned | Unassigned | 695_0  | Clustered           | 17 VC_695_0  | 17  | 0.7188 | 1          | 0.7188 | 0 | 0 | 0 | 0.9044 SHHC |
| S12_vs_26336  | Unassigned | Unassigned | Unassigned | 1605_0 | Clustered           | 2 VC_1605_0  | 2   | 0.709  | 0.87921671 | 0.6234 | 0 | 0 | 0 | 1 SHHC      |
| S12_vs_48045  | Unassigned | Unassigned | Unassigned | 145_0  | Clustered           | 6 VC_145_0   | 6   | 0.2581 | 0.86251824 | 0.2226 | 0 | 0 | 0 | 0.8667 SHHC |
| S12_vs_58560  | Unassigned | Unassigned | Unassigned | 1085_1 | Clustered           | 19 VC_1085_1 | 19  | 0.5328 | 1          | 0.5328 | 0 | 0 | 0 | 0.8947 SHHC |
| S12_vs_5857   | Unassigned | Unassigned | Unassigned | 1230_0 | Clustered           | 2 VC_1230_0  | 2   | 0.3218 | 0.94826234 | 0.3051 | 0 | 0 | 0 | 1 SHHC      |
| S12_vs_6836   | Unassigned | Unassigned | Unassigned | 151_0  | Clustered           | 17 VC_151_0  | 17  | 0.4863 | 1          | 0.4863 | 0 | 0 | 0 | 0.9779 SHHC |
| S12_vs_71525  | Unassigned | Unassigned | Unassigned | 1606_0 | Clustered           | 2 VC_1606_0  | 2   | 0.7979 | 0.85557782 | 0.6827 | 0 | 0 | 0 | 1 SHHC      |
| S12_vs_79785  | Unassigned | Unassigned | Unassigned | 151_0  | Clustered           | 17 VC_151_0  | 17  | 0.4863 | 1          | 0.4863 | 0 | 0 | 0 | 0.9779 SHHC |
| S12_vs_86928  | Unassigned | Unassigned | Unassigned | 752_0  | Clustered           | 2 VC_752_0   | 2   | 0.6495 | 0.85557782 | 0.5557 | 0 | 0 | 0 | 1 SHHC      |
| S12_vs_92868  | Unassigned | Unassigned | Unassigned | 1085_0 | Clustered           | 2 VC_1085_0  | 2   | 0.0548 | 0.95404357 | 0.0523 | 0 | 0 | 0 | 1 SHHC      |
| S12_vs_93357  | Unassigned | Unassigned | Unassigned | 383_0  | Clustered           | 3 VC_383_0   | 3   | 0.1732 | 0.99838578 | 0.173  | 0 | 0 | 0 | 1 SHHC      |
| S12_vs_99092  | Unassigned | Unassigned | Unassigned | 778_0  | Clustered           | 13 VC_778_0  | 13  | 0.2581 | 1          | 0.2581 | 0 | 0 | 0 | 0.9359 SHHC |
| S13CG         | Unassigned | Unassigned | Unassigned | 310_0  | Clustered           | 155 VC_310_0 | 155 | 0.9979 | 1          | 0.9979 | 0 | 0 | 0 | 1 Ref       |
| S13_vs_109235 | Unassigned | Unassigned | Unassigned | 1552_0 | Clustered           | 9 VC_1552_0  | 9   | 0.5828 | 1          | 0.5828 | 0 | 0 | 0 | 0.8056 ME   |
| S13_vs_11246  | Unassigned | Unassigned | Unassigned | 519_0  | Clustered           | 2 VC_519_0   | 2   | 0.0496 | 0.95385383 | 0.0474 | 0 | 0 | 0 | 1 ME        |
| S13_vs_131208 | Unassigned | Unassigned | Unassigned | 1261_0 | Clustered           | 14 VC_1261_0 | 14  | 0.3712 | 1          | 0.3712 | 0 | 0 | 0 | 1 ME        |
| S13_vs_143422 | Unassigned | Unassigned | Unassigned | 519_11 | Clustered           | 7 VC_519_11  | 7   | 0.2104 | 1          | 0.2104 | 0 | 0 | 0 | 0.7619 ME   |
| S13_vs_150407 | Unassigned | Unassigned | Unassigned | 1495_0 | Clustered           | 6 VC_1495_0  | 6   | 0.9829 | 0.98467288 | 0.9678 | 0 | 0 | 0 | 1 ME        |
| S13_vs_151045 | Unassigned | Unassigned | Unassigned | 1490_0 | Clustered           | 6 VC_1490_0  | 6   | 0.4379 | 1          | 0.4379 | 0 | 0 | 0 | 1 ME        |
| S13_vs_151755 | Unassigned | Unassigned | Unassigned | 86_0   | Clustered           | 2 VC_86_0    | 2   | 0.1888 | 0.95560877 | 0.1804 | 0 | 0 | 0 | 1 ME        |
| S13_vs_22175  | Unassigned | Unassigned | Unassigned | 779_0  | Clustered           | 19 VC_779_0  | 19  | 0.5105 | 1          | 0.5105 | 0 | 0 | 0 | 0.924 ME    |
| S13_vs_28309  | Unassigned | Unassigned | Unassigned | 1258_0 | Clustered           | 24 VC_1258_0 | 24  | 0.4451 | 1          | 0.4451 | 0 | 0 | 0 | 1 ME        |
| S13_vs_38708  | Unassigned | Unassigned | Unassigned | 1292_0 | Clustered/Singleton | 1 VC_1292_0  | 1   | 0      | 1          | 0      | 0 | 0 | 0 | 1 ME        |
| S13_vs_4901   | Unassigned | Unassigned | Unassigned | 491_1  | Clustered/Singleton | 1 VC_491_1   | 1   | 0      | 1          | 0      | 0 | 0 | 0 | 1 ME        |
| S13_vs_56074  | Unassigned | Unassigned | Unassigned | 1490_1 | Clustered           | 6 VC_1490_1  | 6   | 0.3734 | 1          | 0.3734 | 0 | 0 | 0 | 1 ME        |
| S13_vs_7670   | Unassigned | Unassigned | Unassigned | 1598_0 | Clustered           | 2 VC_1598_0  | 2   | 1      | 1          | 1      | 0 | 0 | 0 | 1 ME        |
| S13_vs_87873  | Unassigned | Unassigned | Unassigned | 855_0  | Clustered           | 12 VC_855_0  | 12  | 0.6068 | 1          | 0.6068 | 0 | 0 | 0 | 1 ME        |
| S13_vs_113593 | Unassigned | Unassigned | Unassigned | 826_0  | Clustered           | 7 VC_826_0   | 7   | 0.0509 | 0.99909926 | 0.0508 | 0 | 0 | 0 | 1 ME        |
| S13_vs_121307 | Unassigned | Unassigned | Unassigned | 905_0  | Clustered           | 4 VC_905_0   | 4   | 0.2789 | 0.99994112 | 0.2789 | 0 | 0 | 0 | 1 ME        |
| S13_vs_12957  | Unassigned | Unassigned | Unassigned | 1549_0 | Clustered           | 5 VC_1549_0  | 5   | 0.6422 | 0.99998224 | 0.6421 | 0 | 0 | 0 | 1 ME        |
| S13_vs_148294 | Unassigned | Unassigned | Unassigned | 152_0  | Clustered           | 10 VC_152_0  | 10  | 0.6545 | 1          | 0.6545 | 0 | 0 | 0 | 0.8889 ME   |
| S13_vs_151510 | Unassigned | Unassigned | Unassigned | 1054_0 | Clustered           | 5 VC_1054_0  | 5   | 0.1894 | 0.99999402 | 0.1894 | 0 | 0 | 0 | 1 ME        |
| S13_vs_152223 | Unassigned | Unassigned | Unassigned | 826_0  | Clustered           | 7 VC_826_0   | 7   | 0.0509 | 0.99909926 | 0.0508 | 0 | 0 | 0 | 1 ME        |
| S13_vs_15645  | Unassigned | Unassigned | Unassigned | 1055_0 | Clustered           | 2 VC_1055_0  | 2   | 0.0942 | 0.8510834  | 0.0802 | 0 | 0 | 0 | 1 ME        |
| S13_vs_23314  | Unassigned | Unassigned | Unassigned | 649_1  | Clustered           | 14 VC_649_1  | 14  | 0.5226 | 1          | 0.5226 | 0 | 0 | 0 | 0.8352 ME   |
| S13_vs_26756  | Unassigned | Unassigned | Unassigned | 1295_1 | Clustered/Singleton | 1 VC_1295_1  | 1   | 0      | 1          | 0      | 0 | 0 | 0 | 1 ME        |
| S13_vs_30101  | Unassigned | Unassigned | Unassigned | 649_3  | Clustered           | 2 VC_649_3   | 2   | 0.0305 | 0.91827713 | 0.028  | 0 | 0 | 0 | 1 ME        |
| S13_vs_30167  | Unassigned | Unassigned | Unassigned | 649_2  | Clustered           | 2 VC_649_2   | 2   | 0.0766 | 0.95465816 | 0.0731 | 0 | 0 | 0 | 1 ME        |
| S13_vs_33947  | Unassigned | Unassigned | Unassigned | 1291_0 | Clustered           | 18 VC_1291_0 | 18  | 0.5095 | 1          | 0.5095 | 0 | 0 | 0 | 0.9542 ME   |
| S13_vs_35816  | Unassigned | Unassigned | Unassigned | 727_0  | Clustered           | 8 VC_727_0   | 8   | 0.6106 | 1          | 0.6106 | 0 | 0 | 0 | 0.9286 ME   |
| S13_vs_67429  | Unassigned | Unassigned | Unassigned | 153_0  | Clustered           | 2 VC_153_0   | 2   | 0.6127 | 0.90478487 | 0.5544 | 0 | 0 | 0 | 1 ME        |
| S13_vs_68102  | Unassigned | Unassigned | Unassigned | 847_0  | Clustered           | 2 VC_847_0   | 2   | 0.1002 | 0.95451647 | 0.0956 | 0 | 0 | 0 | 1 ME        |
| S13_vs_83447  | Unassigned | Unassigned | Unassigned | 1565_0 | Clustered           | 2 VC_1565_0  | 2   | 0.2323 | 0.95156715 | 0.221  | 0 | 0 | 0 | 1 ME        |
| S13_vs_87108  | Unassigned | Unassigned | Unassigned | 1607_0 | Clustered           | 11 VC_1607_0 | 11  | 0.7884 | 0.99037182 | 0.7808 | 0 | 0 | 0 | 1 ME        |
| S13_vs_90967  | Unassigned | Unassigned | Unassigned | 1300_0 | Clustered           | 2 VC_1300_0  | 2   | 0.0611 | 0.87816446 | 0.0537 | 0 | 0 | 0 | 1 ME        |
| S13_vs_9438   | Unassigned | Unassigned | Unassigned | 1596_0 | Clustered           | 2 VC_1596_0  | 2   | 0.5586 | 0.85557782 | 0.478  | 0 | 0 | 0 | 1 ME        |
| S13_vs_98591  | Unassigned | Unassigned | Unassigned | 439_0  | Clustered           | 3 VC_439_0   | 3   | 0.8601 | 0.98155579 | 0.8442 | 0 | 0 | 0 | 1 ME        |
| S14_vs_106156 | Unassigned | Unassigned | Unassigned | 275_0  | Clustered           | 6 VC_275_0   | 6   | 0.6515 | 0.99999994 | 0.6515 | 0 | 0 | 0 | 0.9333 ME   |
| S14_vs_109545 | Unassigned | Unassigned | Unassigned | 1421_0 | Clustered           | 4 VC_1421_0  | 4   | 0.3219 | 0.99997685 | 0.3219 | 0 | 0 | 0 | 0.8333 ME   |
| S14_vs_114491 | Unassigned | Unassigned | Unassigned | 1258_0 | Clustered           | 24 VC_1258_0 | 24  | 0.4451 | 1          | 0.4451 | 0 | 0 | 0 | 1 ME        |
| S14_vs_117150 | Unassigned | Unassigned | Unassigned | 21_0   | Clustered           | 2 VC_21_0    | 2   | 0.3853 | 0.95038043 | 0.3662 | 0 | 0 | 0 | 1 ME        |
| S14_vs_117157 | Unassigned | Unassigned | Unassigned | 1564_0 | Clustered           | 5 VC_1564_0  | 5   | 1      | 1          | 1      | 0 | 0 | 0 | 1 ME        |
| S14_vs_117164 | Unassigned | Unassigned | Unassigned | 946_0  | Clustered           | 7 VC_946_0   | 7   | 0.8307 | 0.99999953 | 0.8307 | 0 | 0 | 0 | 1 ME        |
| S14_vs_37500  | Unassigned | Unassigned | Unassigned | 1334_0 | Clustered           | 7 VC_1334_0  | 7   | 0.6918 | 1          | 0.6918 | 0 | 0 | 0 | 1 ME        |
| S14_vs_44452  | Unassigned | Unassigned | Unassigned | 1511_0 | Clustered           | 3 VC_1511_0  | 3   | 0.9946 | 0.92554266 | 0.9205 | 0 | 0 | 0 | 1 ME        |
| S14_vs_48775  | Unassigned | Unassigned | Unassigned | 1597_0 | Clustered           | 3 VC_1597_0  | 3   | 1      | 1          | 1      | 0 | 0 | 0 | 1 ME        |
| S14_vs_56130  | Unassigned | Unassigned | Unassigned | 151_0  | Clustered           | 17 VC_151_0  | 17  | 0.4863 | 1          | 0.4863 | 0 | 0 | 0 | 0.9779 ME   |
| S14_vs_58919  | Unassigned | Unassigned | Unassigned | 1288_0 | Clustered           | 7 VC_1288_0  | 7   | 0.9846 | 0.99997693 | 0.9846 | 0 | 0 | 0 | 1 ME        |
| S14_vs_72335  | Unassigned | Unassigned | Unassigned | 720_0  | Clustered           | 6 VC_720_0   | 6   | 0.5406 | 0.99999978 | 0.5406 | 0 | 0 | 0 | 1 ME        |
| S14_vs_72953  | Unassigned | Unassigned | Unassigned | 315_0  | Clustered           | 4 VC_315_0   | 4   | 0.2058 | 0.99995817 | 0.2057 | 0 | 0 | 0 | 1 ME        |
| S14_vs_78139  | Unassigned | Unassigned | Unassigned | 390_0  | Clustered           | 2 VC_390_0   | 2   | 0.4516 | 0.94520071 | 0.4269 | 0 | 0 | 0 | 1 ME        |
| S14_vs_92240  | Unassigned | Unassigned | Unassigned | 1289_0 | Clustered           | 9 VC_1289_0  | 9   | 0.4889 | 1          | 0.4889 | 0 | 0 | 0 | 0.7222 ME   |
| S14_vs_99344  | Unassigned | Unassigned | Unassigned | 1258_0 | Clustered           | 24 VC_1258_0 | 24  | 0.4451 | 1          | 0.4451 | 0 | 0 | 0 | 1 ME        |
| S14_vs_102698 | Unassigned | Unassigned | Unassigned | 782_0  | Clustered           | 5 VC_782_0   | 5   | 0.6682 | 0.99998829 | 0.6682 | 0 | 0 | 0 | 1 ME        |
| S14_vs_110290 | Unassigned | Unassigned | Unassigned | 782_0  | Clustered           | 5 VC_782_0   | 5   | 0.6682 | 0.99998829 | 0.6682 | 0 | 0 | 0 | 1 ME        |
| S14_vs_11510  | Unassigned | Unassigned | Unassigned | 1612_1 | Clustered           | 2 VC_1612_1  | 2   | 0.1681 | 0.92921057 | 0.1562 | 0 | 0 | 0 | 1 ME        |
| S14_vs_117158 | Unassigned | Unassigned | Unassigned | 152_0  | Clustered           | 10 VC_152_0  | 10  | 0.6545 | 1          | 0.6545 | 0 | 0 | 0 | 0.8889 ME   |
| S14_vs_117160 | Unassigned | Unassigned | Unassigned | 658_0  | Clustered           | 3 VC_658_0   | 3   | 0.1319 | 0.99006448 | 0.1305 | 0 | 0 | 0 | 0.6667 ME   |



|               |            |            |            |        |                     |              |    |        |            |        |   |   |   |             |
|---------------|------------|------------|------------|--------|---------------------|--------------|----|--------|------------|--------|---|---|---|-------------|
| S14_vs_117161 | Unassigned | Unassigned | Unassigned | 1289_0 | Clustered           | 9 VC_1289_0  | 9  | 0.4889 | 1          | 0.4889 | 0 | 0 | 0 | 0.7222 ME   |
| S14_vs_117165 | Unassigned | Unassigned | Unassigned | 1479_0 | Clustered           | 4 VC_1479_0  | 4  | 0.3371 | 0.99995008 | 0.3371 | 0 | 0 | 0 | 0.8333 ME   |
| S14_vs_117166 | Unassigned | Unassigned | Unassigned | 779_0  | Clustered           | 19 VC_779_0  | 19 | 0.5105 | 1          | 0.5105 | 0 | 0 | 0 | 0.924 ME    |
| S14_vs_14737  | Unassigned | Unassigned | Unassigned | 923_0  | Clustered           | 7 VC_923_0   | 7  | 0.1207 | 0.99951443 | 0.1206 | 0 | 0 | 0 | 0.9524 ME   |
| S14_vs_15228  | Unassigned | Unassigned | Unassigned | 1055_1 | Clustered           | 3 VC_1055_1  | 3  | 0.2077 | 0.97832531 | 0.2032 | 0 | 0 | 0 | 1 ME        |
| S14_vs_25852  | Unassigned | Unassigned | Unassigned | 1612_0 | Clustered           | 2 VC_1612_0  | 2  | 0.2514 | 0.92921057 | 0.2336 | 0 | 0 | 0 | 1 ME        |
| S14_vs_2870   | Unassigned | Unassigned | Unassigned | 383_0  | Clustered           | 3 VC_383_0   | 3  | 0.1732 | 0.99838578 | 0.173  | 0 | 0 | 0 | 1 ME        |
| S14_vs_32499  | Unassigned | Unassigned | Unassigned | 1505_0 | Clustered           | 7 VC_1505_0  | 7  | 0.4784 | 0.99999946 | 0.4784 | 0 | 0 | 0 | 0.9048 ME   |
| S14_vs_3251   | Unassigned | Unassigned | Unassigned | 1294_0 | Clustered           | 2 VC_1294_0  | 2  | 0.0827 | 0.95399215 | 0.0789 | 0 | 0 | 0 | 1 ME        |
| S14_vs_39797  | Unassigned | Unassigned | Unassigned | 923_0  | Clustered           | 7 VC_923_0   | 7  | 0.1207 | 0.99951443 | 0.1206 | 0 | 0 | 0 | 0.9524 ME   |
| S14_vs_59347  | Unassigned | Unassigned | Unassigned | 720_0  | Clustered           | 6 VC_720_0   | 6  | 0.5406 | 0.99999978 | 0.5406 | 0 | 0 | 0 | 1 ME        |
| S14_vs_61530  | Unassigned | Unassigned | Unassigned | 779_0  | Clustered           | 19 VC_779_0  | 19 | 0.5105 | 1          | 0.5105 | 0 | 0 | 0 | 0.924 ME    |
| S14_vs_62178  | Unassigned | Unassigned | Unassigned | 778_0  | Clustered           | 13 VC_778_0  | 13 | 0.2581 | 1          | 0.2581 | 0 | 0 | 0 | 0.9359 ME   |
| S14_vs_632    | Unassigned | Unassigned | Unassigned | 151_0  | Clustered           | 17 VC_151_0  | 17 | 0.4863 | 1          | 0.4863 | 0 | 0 | 0 | 0.9779 ME   |
| S14_vs_66139  | Unassigned | Unassigned | Unassigned | 649_0  | Clustered           | 2 VC_649_0   | 2  | 0.1474 | 0.95329905 | 0.1405 | 0 | 0 | 0 | 1 ME        |
| S14_vs_66208  | Unassigned | Unassigned | Unassigned | 950_0  | Clustered           | 5 VC_950_0   | 5  | 0.5772 | 0.99999979 | 0.5772 | 0 | 0 | 0 | 1 ME        |
| S14_vs_66841  | Unassigned | Unassigned | Unassigned | 1149_0 | Clustered           | 3 VC_1149_0  | 3  | 0.5474 | 0.99645906 | 0.5454 | 0 | 0 | 0 | 1 ME        |
| S14_vs_67094  | Unassigned | Unassigned | Unassigned | 1614_0 | Clustered           | 3 VC_1614_0  | 3  | 1      | 1          | 1      | 0 | 0 | 0 | 1 ME        |
| S14_vs_70985  | Unassigned | Unassigned | Unassigned | 1612_2 | Clustered/Singleton | 1 VC_1612_2  | 1  | 0      | 1          | 0      | 0 | 0 | 0 | 1 ME        |
| S14_vs_73301  | Unassigned | Unassigned | Unassigned | 920_0  | Clustered           | 2 VC_920_0   | 2  | 0.1084 | 0.86113896 | 0.0934 | 0 | 0 | 0 | 1 ME        |
| S14_vs_74067  | Unassigned | Unassigned | Unassigned | 1582_2 | Clustered/Singleton | 1 VC_1582_2  | 1  | 0      | 1          | 0      | 0 | 0 | 0 | 1 ME        |
| S14_vs_78164  | Unassigned | Unassigned | Unassigned | 694_0  | Clustered           | 2 VC_694_0   | 2  | 0.1836 | 0.94940611 | 0.1743 | 0 | 0 | 0 | 1 ME        |
| S14_vs_88666  | Unassigned | Unassigned | Unassigned | 1035_0 | Clustered           | 2 VC_1035_0  | 2  | 0.4399 | 0.94022524 | 0.4136 | 0 | 0 | 0 | 1 ME        |
| S14_vs_96111  | Unassigned | Unassigned | Unassigned | 649_1  | Clustered           | 14 VC_649_1  | 14 | 0.5226 | 1          | 0.5226 | 0 | 0 | 0 | 0.8352 ME   |
| S14_vs_9676   | Unassigned | Unassigned | Unassigned | 1291_0 | Clustered           | 18 VC_1291_0 | 18 | 0.5095 | 1          | 0.5095 | 0 | 0 | 0 | 0.9542 ME   |
| S15_vf_2032   | Unassigned | Unassigned | Unassigned | 1527_0 | Clustered           | 2 VC_1527_0  | 2  | 0.3636 | 0.94251254 | 0.3427 | 0 | 0 | 0 | 1 SHHC      |
| S15_vf_20644  | Unassigned | Unassigned | Unassigned | 1490_1 | Clustered           | 6 VC_1490_1  | 6  | 0.3734 | 1          | 0.3734 | 0 | 0 | 0 | 1 SHHC      |
| S15_vf_2513   | Unassigned | Unassigned | Unassigned | 1254_2 | Clustered           | 2 VC_1254_2  | 2  | 0.0651 | 0.95173063 | 0.062  | 0 | 0 | 0 | 1 SHHC      |
| S15_vf_55639  | Unassigned | Unassigned | Unassigned | 946_0  | Clustered           | 7 VC_946_0   | 7  | 0.8307 | 0.99999953 | 0.8307 | 0 | 0 | 0 | 1 SHHC      |
| S15_vf_74586  | Unassigned | Unassigned | Unassigned | 1490_0 | Clustered           | 6 VC_1490_0  | 6  | 0.4379 | 1          | 0.4379 | 0 | 0 | 0 | 1 SHHC      |
| S15_vf_75924  | Unassigned | Unassigned | Unassigned | 1079_0 | Clustered/Singleton | 1 VC_1079_0  | 1  | 0      | 1          | 0      | 0 | 0 | 0 | 1 SHHC      |
| S15_vs_1407   | Unassigned | Unassigned | Unassigned | 946_0  | Clustered           | 7 VC_946_0   | 7  | 0.8307 | 0.99999953 | 0.8307 | 0 | 0 | 0 | 1 SHHC      |
| S15_vs_18274  | Unassigned | Unassigned | Unassigned | 1602_0 | Clustered           | 4 VC_1602_0  | 4  | 0.797  | 0.99955772 | 0.7966 | 0 | 0 | 0 | 1 SHHC      |
| S15_vs_27510  | Unassigned | Unassigned | Unassigned | 1559_1 | Clustered           | 2 VC_1559_1  | 2  | 0.2007 | 0.94912804 | 0.1905 | 0 | 0 | 0 | 1 SHHC      |
| S15_vs_35445  | Unassigned | Unassigned | Unassigned | 1599_0 | Clustered           | 2 VC_1599_0  | 2  | 0.3041 | 0.89435023 | 0.272  | 0 | 0 | 0 | 1 SHHC      |
| S15_vs_42043  | Unassigned | Unassigned | Unassigned | 1559_2 | Clustered/Singleton | 1 VC_1559_2  | 1  | 0      | 1          | 0      | 0 | 0 | 0 | 1 SHHC      |
| S15_vs_7103   | Unassigned | Unassigned | Unassigned | 1421_0 | Clustered           | 4 VC_1421_0  | 4  | 0.3219 | 0.99997685 | 0.3219 | 0 | 0 | 0 | 0.8333 SHHC |
| S15_vs_71968  | Unassigned | Unassigned | Unassigned | 630_0  | Clustered           | 4 VC_630_0   | 4  | 0.8863 | 0.99987744 | 0.8862 | 0 | 0 | 0 | 0.6667 SHHC |
| S15_vs_76390  | Unassigned | Unassigned | Unassigned | 967_0  | Clustered           | 5 VC_967_0   | 5  | 0.992  | 0.97937098 | 0.9715 | 0 | 0 | 0 | 1 SHHC      |
| S16_vf_100235 | Unassigned | Unassigned | Unassigned | 1258_0 | Clustered           | 24 VC_1258_0 | 24 | 0.4451 | 1          | 0.4451 | 0 | 1 | 0 | 1 SHHC      |
| S16_vf_100378 | Unassigned | Unassigned | Unassigned | 826_0  | Clustered           | 7 VC_826_0   | 7  | 0.0509 | 0.99909926 | 0.0508 | 0 | 0 | 0 | 1 SHHC      |
| S16_vf_1037   | Unassigned | Unassigned | Unassigned | 1254_1 | Clustered           | 2 VC_1254_1  | 2  | 0.1731 | 0.94988795 | 0.1644 | 0 | 0 | 0 | 1 SHHC      |
| S16_vf_108554 | Unassigned | Unassigned | Unassigned | 1554_1 | Clustered/Singleton | 1 VC_1554_1  | 1  | 0      | 1          | 0      | 0 | 0 | 0 | 1 SHHC      |
| S16_vf_119834 | Unassigned | Unassigned | Unassigned | 1261_0 | Clustered           | 14 VC_1261_0 | 14 | 0.3712 | 1          | 0.3712 | 0 | 0 | 0 | 1 SHHC      |
| S16_vf_151450 | Unassigned | Unassigned | Unassigned | 693_0  | Clustered           | 4 VC_693_0   | 4  | 0.3    | 0.99997992 | 0.3    | 0 | 0 | 0 | 1 SHHC      |
| S16_vf_164913 | Unassigned | Unassigned | Unassigned | 1607_0 | Clustered           | 11 VC_1607_0 | 11 | 0.7884 | 0.99037182 | 0.7808 | 0 | 0 | 0 | 1 SHHC      |
| S16_vf_169895 | Unassigned | Unassigned | Unassigned | 1261_0 | Clustered           | 14 VC_1261_0 | 14 | 0.3712 | 1          | 0.3712 | 0 | 0 | 0 | 1 SHHC      |
| S16_vf_169985 | Unassigned | Unassigned | Unassigned | 1490_0 | Clustered           | 6 VC_1490_0  | 6  | 0.4379 | 1          | 0.4379 | 0 | 0 | 0 | 1 SHHC      |
| S16_vf_173099 | Unassigned | Unassigned | Unassigned | 1586_0 | Clustered/Singleton | 1 VC_1586_0  | 1  | 0      | 1          | 0      | 0 | 0 | 0 | 1 SHHC      |
| S16_vf_173109 | Unassigned | Unassigned | Unassigned | 1485_0 | Clustered           | 3 VC_1485_0  | 3  | 0.7417 | 0.9595722  | 0.7117 | 0 | 0 | 0 | 1 SHHC      |
| S16_vf_36146  | Unassigned | Unassigned | Unassigned | 151_0  | Clustered           | 17 VC_151_0  | 17 | 0.4863 | 1          | 0.4863 | 0 | 0 | 0 | 0.9779 SHHC |
| S16_vf_5270   | Unassigned | Unassigned | Unassigned | 1085_1 | Clustered           | 19 VC_1085_1 | 19 | 0.5328 | 1          | 0.5328 | 0 | 0 | 0 | 0.8947 SHHC |
| S16_vf_6102   | Unassigned | Unassigned | Unassigned | 728_0  | Clustered           | 7 VC_728_0   | 7  | 0.2344 | 1          | 0.2344 | 0 | 0 | 0 | 0.8095 SHHC |
| S16_vf_87190  | Unassigned | Unassigned | Unassigned | 963_0  | Clustered           | 4 VC_963_0   | 4  | 0.2848 | 0.99994144 | 0.2848 | 0 | 0 | 0 | 0.8333 SHHC |
| S16_vf_90328  | Unassigned | Unassigned | Unassigned | 1477_0 | Clustered           | 2 VC_1477_0  | 2  | 0.1794 | 0.94916107 | 0.1703 | 0 | 0 | 0 | 1 SHHC      |
| S16_vf_96483  | Unassigned | Unassigned | Unassigned | 1557_0 | Clustered/Singleton | 1 VC_1557_0  | 1  | 0      | 1          | 0      | 0 | 0 | 0 | 1 SHHC      |
| S16_vf_97279  | Unassigned | Unassigned | Unassigned | 723_0  | Clustered           | 20 VC_723_0  | 20 | 0.7344 | 1          | 0.7344 | 0 | 0 | 0 | 0.7 SHHC    |
| S16_vs_103726 | Unassigned | Unassigned | Unassigned | 779_0  | Clustered           | 19 VC_779_0  | 19 | 0.5105 | 1          | 0.5105 | 0 | 0 | 0 | 0.924 SHHC  |
| S16_vs_116956 | Unassigned | Unassigned | Unassigned | 442_0  | Clustered           | 3 VC_442_0   | 3  | 0.4483 | 0.9977727  | 0.4473 | 0 | 0 | 0 | 1 SHHC      |
| S16_vs_120622 | Unassigned | Unassigned | Unassigned | 383_0  | Clustered           | 3 VC_383_0   | 3  | 0.1732 | 0.99838578 | 0.173  | 0 | 0 | 0 | 1 SHHC      |
| S16_vs_124703 | Unassigned | Unassigned | Unassigned | 667_0  | Clustered           | 12 VC_667_0  | 12 | 0.2907 | 0.99999999 | 0.2907 | 0 | 0 | 0 | 1 SHHC      |
| S16_vs_127669 | Unassigned | Unassigned | Unassigned | 1526_0 | Clustered           | 3 VC_1526_0  | 3  | 0.6842 | 0.9969176  | 0.6821 | 0 | 0 | 0 | 1 SHHC      |
| S16_vs_127905 | Unassigned | Unassigned | Unassigned | 1559_1 | Clustered           | 2 VC_1559_1  | 2  | 0.2007 | 0.94912804 | 0.1905 | 0 | 0 | 0 | 1 SHHC      |
| S16_vs_136935 | Unassigned | Unassigned | Unassigned | 1063_0 | Clustered           | 2 VC_1063_0  | 2  | 0.4174 | 0.93555746 | 0.3905 | 0 | 0 | 0 | 1 SHHC      |
| S16_vs_142561 | Unassigned | Unassigned | Unassigned | 630_0  | Clustered           | 4 VC_630_0   | 4  | 0.8863 | 0.99987744 | 0.8862 | 0 | 0 | 0 | 0.6667 SHHC |
| S16_vs_15093  | Unassigned | Unassigned | Unassigned | 1434_0 | Clustered/Singleton | 1 VC_1434_0  | 1  | 0      | 1          | 0      | 0 | 0 | 0 | 1 SHHC      |
| S16_vs_173079 | Unassigned | Unassigned | Unassigned | 442_0  | Clustered           | 3 VC_442_0   | 3  | 0.4483 | 0.9977727  | 0.4473 | 0 | 0 | 0 | 1 SHHC      |
| S16_vs_173096 | Unassigned | Unassigned | Unassigned | 751_0  | Clustered           | 2 VC_751_0   | 2  | 0.6768 | 0.87921671 | 0.595  | 0 | 0 | 0 | 1 SHHC      |
| S16_vs_173102 | Unassigned | Unassigned | Unassigned | 855_0  | Clustered           | 12 VC_855_0  | 12 | 0.6068 | 1          | 0.6068 | 0 | 0 | 0 | 1 SHHC      |
| S16_vs_18440  | Unassigned | Unassigned | Unassigned | 728_0  | Clustered           | 7 VC_728_0   | 7  | 0.2344 | 1          | 0.2344 | 0 | 0 | 0 | 0.8095 SHHC |
| S16_vs_19320  | Unassigned | Unassigned | Unassigned | 1230_0 | Clustered           | 2 VC_1230_0  | 2  | 0.3218 | 0.94826234 | 0.3051 | 0 | 0 | 0 | 1 SHHC      |
| S16_vs_19968  | Unassigned | Unassigned | Unassigned | 1591_0 | Clustered           | 2 VC_1591_0  | 2  | 0.1308 | 0.78540235 | 0.1027 | 0 | 0 | 0 | 1 SHHC      |
| S16_vs_26078  | Unassigned | Unassigned | Unassigned | 778_0  | Clustered           | 13 VC_778_0  | 13 | 0.2581 | 1          | 0.2581 | 0 | 0 | 0 | 0.9359 SHHC |
| S16_vs_32764  | Unassigned | Unassigned | Unassigned | 1599_0 | Clustered           | 2 VC_1599_0  | 2  | 0.3041 | 0.89435023 | 0.272  | 0 | 0 | 0 | 1 SHHC      |
| S16_vs_33281  | Unassigned | Unassigned | Unassigned | 1591_0 | Clustered           | 2 VC_1591_0  | 2  | 0.1308 | 0.78540235 | 0.1027 | 0 | 0 | 0 | 1 SHHC      |
| S16_vs_34751  | Unassigned | Unassigned | Unassigned | 780_0  | Clustered/Singleton | 1 VC_780_0   | 1  | 0      | 1          | 0      | 0 | 0 | 0 | 1 SHHC      |
| S16_vs_4662   | Unassigned | Unassigned | Unassigned | 667_0  | Clustered           | 12 VC_667_0  | 12 | 0.2907 | 0.99999999 | 0.2907 | 0 | 0 | 0 | 1 SHHC      |
| S16_vs_48714  | Unassigned | Unassigned | Unassigned | 1616_0 | Clustered           | 2 VC_1616_0  | 2  | 1      | 1          | 1      | 0 | 0 | 0 | 1 SHHC      |
| S16_vs_51901  | Unassigned | Unassigned | Unassigned | 1602_0 | Clustered           | 4 VC_1602_0  | 4  | 0.797  | 0.99955772 | 0.7966 | 0 | 0 | 0 | 1 SHHC      |
| S16_vs_64584  | Unassigned | Unassigned | Unassigned | 1611_0 | Clustered           | 4 VC_1611_0  | 4  | 0.5712 | 0.99972475 | 0.571  | 0 | 0 | 0 | 1 SHHC      |
| S16_vs_75108  | Unassigned | Unassigned | Unassigned | 1290_0 | Clustered           | 4 VC_1290_0  | 4  | 0.2185 | 0.99997703 | 0.2185 | 0 | 0 | 0 | 1 SHHC      |



|               |            |            |            |        |                     |     |           |     |        |            |        |   |   |   |        |      |
|---------------|------------|------------|------------|--------|---------------------|-----|-----------|-----|--------|------------|--------|---|---|---|--------|------|
| S16_vs_78361  | Unassigned | Unassigned | Unassigned | 878_0  | Clustered           | 2   | VC_878_0  | 2   | 0.2604 | 0.94178001 | 0.2453 | 0 | 0 | 0 | 1      | SHHC |
| S16_vs_80244  | Unassigned | Unassigned | Unassigned | 1579_0 | Clustered           | 2   | VC_1579_0 | 2   | 0.6144 | 0.93555746 | 0.5748 | 0 | 0 | 0 | 1      | SHHC |
| S16_vs_86116  | Unassigned | Unassigned | Unassigned | 727_0  | Clustered           | 8   | VC_727_0  | 8   | 0.6106 | 1          | 0.6106 | 0 | 0 | 0 | 0.9286 | SHHC |
| S16_vs_89511  | Unassigned | Unassigned | Unassigned | 670_0  | Clustered           | 4   | VC_670_0  | 4   | 0.4145 | 0.99998287 | 0.4145 | 0 | 0 | 0 | 1      | SHHC |
| S16_vs_92150  | Unassigned | Unassigned | Unassigned | 779_0  | Clustered           | 19  | VC_779_0  | 19  | 0.5105 | 1          | 0.5105 | 0 | 0 | 0 | 0.924  | SHHC |
| S17_vf_148303 | Unassigned | Unassigned | Unassigned | 1258_0 | Clustered           | 24  | VC_1258_0 | 24  | 0.4451 | 1          | 0.4451 | 0 | 0 | 0 | 1      | ME   |
| S17_vf_172132 | Unassigned | Unassigned | Unassigned | 1607_0 | Clustered           | 11  | VC_1607_0 | 11  | 0.7884 | 0.99037182 | 0.7808 | 0 | 0 | 0 | 1      | ME   |
| S17_vf_174033 | Unassigned | Unassigned | Unassigned | 1040_0 | Clustered           | 2   | VC_1040_0 | 2   | 0.3919 | 0.94750719 | 0.3713 | 0 | 0 | 0 | 1      | ME   |
| S17_vf_174203 | Unassigned | Unassigned | Unassigned | 1258_0 | Clustered           | 24  | VC_1258_0 | 24  | 0.4451 | 1          | 0.4451 | 0 | 0 | 0 | 1      | ME   |
| S17_vf_177197 | Unassigned | Unassigned | Unassigned | 1617_0 | Clustered           | 2   | VC_1617_0 | 2   | 1      | 1          | 1      | 0 | 0 | 0 | 1      | ME   |
| S17_vf_177199 | Unassigned | Unassigned | Unassigned | 560_0  | Clustered           | 15  | VC_560_0  | 15  | 0.2846 | 1          | 0.2846 | 0 | 0 | 0 | 1      | ME   |
| S17_vf_35138  | Unassigned | Unassigned | Unassigned | 949_0  | Clustered           | 2   | VC_949_0  | 2   | 0.3686 | 0.94166128 | 0.3471 | 0 | 0 | 0 | 1      | ME   |
| S17_vf_67042  | Unassigned | Unassigned | Unassigned | 1261_0 | Clustered           | 14  | VC_1261_0 | 14  | 0.3712 | 1          | 0.3712 | 0 | 0 | 0 | 1      | ME   |
| S17_vf_77057  | Unassigned | Unassigned | Unassigned | 1585_0 | Clustered           | 3   | VC_1585_0 | 3   | 0.9814 | 0.81445332 | 0.7993 | 0 | 0 | 0 | 1      | ME   |
| S17_vf_79151  | Unassigned | Unassigned | Unassigned | 1258_0 | Clustered           | 24  | VC_1258_0 | 24  | 0.4451 | 1          | 0.4451 | 0 | 0 | 0 | 1      | ME   |
| S17_vf_81232  | Unassigned | Unassigned | Unassigned | 519_11 | Clustered           | 7   | VC_519_11 | 7   | 0.2104 | 1          | 0.2104 | 0 | 0 | 0 | 0.7619 | ME   |
| S17_vf_97671  | Unassigned | Unassigned | Unassigned | 1288_0 | Clustered           | 7   | VC_1288_0 | 7   | 0.9846 | 0.99997693 | 0.9846 | 0 | 0 | 0 | 1      | ME   |
| S17_vs_103009 | Unassigned | Unassigned | Unassigned | 1291_0 | Clustered           | 18  | VC_1291_0 | 18  | 0.5095 | 1          | 0.5095 | 0 | 0 | 0 | 0.9542 | ME   |
| S17_vs_116640 | Unassigned | Unassigned | Unassigned | 1505_0 | Clustered           | 7   | VC_1505_0 | 7   | 0.4784 | 0.99999946 | 0.4784 | 0 | 0 | 0 | 0.9048 | ME   |
| S17_vs_121041 | Unassigned | Unassigned | Unassigned | 778_0  | Clustered           | 13  | VC_778_0  | 13  | 0.2581 | 1          | 0.2581 | 0 | 0 | 0 | 0.9359 | ME   |
| S17_vs_127519 | Unassigned | Unassigned | Unassigned | 1290_0 | Clustered           | 4   | VC_1290_0 | 4   | 0.2185 | 0.99997703 | 0.2185 | 0 | 0 | 0 | 1      | ME   |
| S17_vs_138036 | Unassigned | Unassigned | Unassigned | 967_0  | Clustered           | 5   | VC_967_0  | 5   | 0.992  | 0.97937098 | 0.9715 | 0 | 0 | 0 | 1      | ME   |
| S17_vs_160502 | Unassigned | Unassigned | Unassigned | 948_0  | Clustered           | 3   | VC_948_0  | 3   | 0.2818 | 0.99753105 | 0.2811 | 0 | 0 | 0 | 1      | ME   |
| S17_vs_177196 | Unassigned | Unassigned | Unassigned | 1602_0 | Clustered           | 4   | VC_1602_0 | 4   | 0.797  | 0.99955772 | 0.7966 | 0 | 0 | 0 | 1      | ME   |
| S17_vs_2079   | Unassigned | Unassigned | Unassigned | 695_0  | Clustered           | 17  | VC_695_0  | 17  | 0.7188 | 1          | 0.7188 | 0 | 0 | 0 | 0.9044 | ME   |
| S17_vs_39515  | Unassigned | Unassigned | Unassigned | 948_0  | Clustered           | 3   | VC_948_0  | 3   | 0.2818 | 0.99753105 | 0.2811 | 0 | 0 | 0 | 1      | ME   |
| S17_vs_41845  | Unassigned | Unassigned | Unassigned | 779_0  | Clustered           | 19  | VC_779_0  | 19  | 0.5105 | 1          | 0.5105 | 0 | 0 | 0 | 0.924  | ME   |
| S17_vs_43307  | Unassigned | Unassigned | Unassigned | 1583_0 | Clustered           | 3   | VC_1583_0 | 3   | 0.6428 | 0.99188498 | 0.6375 | 0 | 0 | 0 | 1      | ME   |
| S17_vs_58025  | Unassigned | Unassigned | Unassigned | 1607_0 | Clustered           | 11  | VC_1607_0 | 11  | 0.7884 | 0.99037182 | 0.7808 | 0 | 0 | 0 | 1      | ME   |
| S17_vs_73830  | Unassigned | Unassigned | Unassigned | 779_0  | Clustered           | 19  | VC_779_0  | 19  | 0.5105 | 1          | 0.5105 | 0 | 0 | 0 | 0.924  | ME   |
| S17_vf_125650 | Unassigned | Unassigned | Unassigned | 1607_0 | Clustered           | 11  | VC_1607_0 | 11  | 0.7884 | 0.99037182 | 0.7808 | 0 | 0 | 0 | 1      | ME   |
| S1_vf_158961  | Unassigned | Unassigned | Unassigned | 1256_0 | Clustered           | 3   | VC_1256_0 | 3   | 0.7864 | 0.99722149 | 0.7842 | 0 | 0 | 0 | 1      | ME   |
| S1_vf_159951  | Unassigned | Unassigned | Unassigned | 1489_0 | Clustered           | 2   | VC_1489_0 | 2   | 0.4715 | 0.94337096 | 0.4448 | 0 | 0 | 0 | 1      | ME   |
| S1_vf_22149   | Unassigned | Unassigned | Unassigned | 1552_0 | Clustered           | 9   | VC_1552_0 | 9   | 0.5828 | 1          | 0.5828 | 0 | 0 | 0 | 0.8056 | ME   |
| S1_vf_50591   | Unassigned | Unassigned | Unassigned | 905_0  | Clustered           | 4   | VC_905_0  | 4   | 0.2789 | 0.99994112 | 0.2789 | 0 | 0 | 0 | 1      | ME   |
| S1_vs_100019  | Unassigned | Unassigned | Unassigned | 1300_0 | Clustered           | 2   | VC_1300_0 | 2   | 0.0611 | 0.87816446 | 0.0537 | 0 | 0 | 0 | 1      | ME   |
| S1_vs_143929  | Unassigned | Unassigned | Unassigned | 1554_0 | Clustered           | 5   | VC_1554_0 | 5   | 0.1182 | 0.99926768 | 0.1181 | 0 | 0 | 0 | 0.7    | ME   |
| S1_vs_3435    | Unassigned | Unassigned | Unassigned | 1385_0 | Clustered           | 4   | VC_1385_0 | 4   | 0.1856 | 0.61974159 | 0.1115 | 0 | 0 | 0 | 1      | ME   |
| S1_vs_62409   | Unassigned | Unassigned | Unassigned | 778_0  | Clustered           | 13  | VC_778_0  | 13  | 0.2581 | 1          | 0.2581 | 0 | 0 | 0 | 0.9359 | ME   |
| S1_vs_91270   | Unassigned | Unassigned | Unassigned | 782_0  | Clustered           | 5   | VC_782_0  | 5   | 0.6682 | 0.99998829 | 0.6682 | 0 | 0 | 0 | 1      | ME   |
| S2_vf_20910   | Unassigned | Unassigned | Unassigned | 1585_0 | Clustered           | 3   | VC_1585_0 | 3   | 0.9814 | 0.81445332 | 0.7993 | 0 | 0 | 0 | 1      | SHHC |
| S2_vf_21511   | Unassigned | Unassigned | Unassigned | 1085_1 | Clustered           | 19  | VC_1085_1 | 19  | 0.5328 | 1          | 0.5328 | 0 | 1 | 0 | 0.8947 | SHHC |
| S2_vf_21630   | Unassigned | Unassigned | Unassigned | 921_0  | Clustered           | 4   | VC_921_0  | 4   | 0.6171 | 0.99994641 | 0.6171 | 0 | 0 | 0 | 1      | SHHC |
| S2_vf_3356    | Unassigned | Unassigned | Unassigned | 1607_0 | Clustered           | 11  | VC_1607_0 | 11  | 0.7884 | 0.99037182 | 0.7808 | 0 | 0 | 0 | 1      | SHHC |
| S2_vf_4910    | Unassigned | Unassigned | Unassigned | 1261_0 | Clustered           | 14  | VC_1261_0 | 14  | 0.3712 | 1          | 0.3712 | 0 | 0 | 0 | 1      | SHHC |
| S2_vs_10289   | Unassigned | Unassigned | Unassigned | 695_0  | Clustered           | 17  | VC_695_0  | 17  | 0.7188 | 1          | 0.7188 | 0 | 0 | 0 | 0.9044 | SHHC |
| S2_vs_7306    | Unassigned | Unassigned | Unassigned | 855_0  | Clustered           | 12  | VC_855_0  | 12  | 0.6068 | 1          | 0.6068 | 0 | 0 | 0 | 1      | SHHC |
| S3_vf_100440  | Unassigned | Unassigned | Unassigned | 151_0  | Clustered           | 17  | VC_151_0  | 17  | 0.4863 | 1          | 0.4863 | 0 | 0 | 0 | 0.9779 | ME   |
| S3_vf_106401  | Unassigned | Unassigned | Unassigned | 430_0  | Clustered           | 2   | VC_430_0  | 2   | 0.2142 | 0.87713065 | 0.1878 | 0 | 0 | 0 | 1      | ME   |
| S3_vf_108959  | Unassigned | Unassigned | Unassigned | 1254_3 | Clustered/Singleton | 1   | VC_1254_3 | 1   | 0      | 1          | 0      | 0 | 0 | 0 | 1      | ME   |
| S3_vf_109277  | Unassigned | Unassigned | Unassigned | 1558_0 | Clustered           | 3   | VC_1558_0 | 3   | 0.9429 | 0.92554266 | 0.8727 | 0 | 0 | 0 | 1      | ME   |
| S3_vf_111776  | Unassigned | Unassigned | Unassigned | 1261_0 | Clustered           | 14  | VC_1261_0 | 14  | 0.3712 | 1          | 0.3712 | 0 | 0 | 0 | 1      | ME   |
| S3_vf_115304  | Unassigned | Unassigned | Unassigned | 519_2  | Clustered           | 2   | VC_519_2  | 2   | 0.0443 | 0.94893696 | 0.042  | 0 | 0 | 0 | 1      | ME   |
| S3_vf_127168  | Unassigned | Unassigned | Unassigned | 1607_0 | Clustered           | 11  | VC_1607_0 | 11  | 0.7884 | 0.99037182 | 0.7808 | 0 | 0 | 0 | 1      | ME   |
| S3_vf_127399  | Unassigned | Unassigned | Unassigned | 1489_0 | Clustered           | 2   | VC_1489_0 | 2   | 0.4715 | 0.94337096 | 0.4448 | 0 | 0 | 0 | 1      | ME   |
| S3_vf_127405  | Unassigned | Unassigned | Unassigned | 21_0   | Clustered           | 2   | VC_21_0   | 2   | 0.3853 | 0.95038043 | 0.3662 | 0 | 0 | 0 | 1      | ME   |
| S3_vf_127406  | Unassigned | Unassigned | Unassigned | 1490_1 | Clustered           | 6   | VC_1490_1 | 6   | 0.3734 | 1          | 0.3734 | 0 | 0 | 0 | 1      | ME   |
| S3_vf_127409  | Unassigned | Unassigned | Unassigned | 151_0  | Clustered           | 17  | VC_151_0  | 17  | 0.4863 | 1          | 0.4863 | 0 | 0 | 0 | 0.9779 | ME   |
| S3_vf_127423  | Unassigned | Unassigned | Unassigned | 1618_0 | Clustered           | 2   | VC_1618_0 | 2   | 1      | 1          | 1      | 0 | 0 | 0 | 1      | ME   |
| S3_vf_127426  | Unassigned | Unassigned | Unassigned | 1145_0 | Clustered           | 164 | VC_1145_0 | 164 | 0.8868 | 1          | 0.8868 | 0 | 0 | 0 | 1      | ME   |
| S3_vf_127431  | Unassigned | Unassigned | Unassigned | 1492_0 | Clustered           | 8   | VC_1492_0 | 8   | 0.8295 | 0.99999998 | 0.8295 | 0 | 0 | 0 | 1      | ME   |
| S3_vf_127447  | Unassigned | Unassigned | Unassigned | 1054_1 | Clustered           | 8   | VC_1054_1 | 8   | 0.3937 | 1          | 0.3937 | 0 | 0 | 0 | 0.9286 | ME   |
| S3_vf_17748   | Unassigned | Unassigned | Unassigned | 691_0  | Clustered           | 18  | VC_691_0  | 18  | 0.6865 | 1          | 0.6865 | 0 | 0 | 0 | 0.9477 | ME   |
| S3_vf_18080   | Unassigned | Unassigned | Unassigned | 1576_0 | Clustered           | 5   | VC_1576_0 | 5   | 0.7068 | 0.99999939 | 0.7068 | 0 | 0 | 0 | 1      | ME   |
| S3_vf_18829   | Unassigned | Unassigned | Unassigned | 1490_0 | Clustered           | 6   | VC_1490_0 | 6   | 0.4379 | 1          | 0.4379 | 0 | 0 | 0 | 1      | ME   |
| S3_vf_25163   | Unassigned | Unassigned | Unassigned | 519_7  | Clustered           | 2   | VC_519_7  | 2   | 0.0454 | 0.95144654 | 0.0432 | 0 | 0 | 0 | 1      | ME   |
| S3_vf_35073   | Unassigned | Unassigned | Unassigned | 1085_1 | Clustered           | 19  | VC_1085_1 | 19  | 0.5328 | 1          | 0.5328 | 0 | 0 | 0 | 0.8947 | ME   |
| S3_vf_44405   | Unassigned | Unassigned | Unassigned | 826_0  | Clustered           | 7   | VC_826_0  | 7   | 0.0509 | 0.99909926 | 0.0508 | 0 | 0 | 0 | 1      | ME   |
| S3_vf_54353   | Unassigned | Unassigned | Unassigned | 880_0  | Clustered           | 4   | VC_880_0  | 4   | 0.0727 | 0.88800114 | 0.0645 | 0 | 0 | 0 | 1      | ME   |
| S3_vf_54498   | Unassigned | Unassigned | Unassigned | 1299_0 | Clustered           | 53  | VC_1299_0 | 53  | 0.8666 | 1          | 0.8666 | 0 | 0 | 0 | 1      | ME   |
| S3_vf_57422   | Unassigned | Unassigned | Unassigned | 1258_0 | Clustered           | 24  | VC_1258_0 | 24  | 0.4451 | 1          | 0.4451 | 0 | 0 | 0 | 1      | ME   |
| S3_vf_61860   | Unassigned | Unassigned | Unassigned | 923_1  | Clustered/Singleton | 1   | VC_923_1  | 1   | 0      | 1          | 0      | 0 | 0 | 0 | 1      | ME   |
| S3_vf_67333   | Unassigned | Unassigned | Unassigned | 1254_0 | Clustered           | 2   | VC_1254_0 | 2   | 0.1537 | 0.95108637 | 0.1461 | 0 | 0 | 0 | 1      | ME   |
| S3_vf_67828   | Unassigned | Unassigned | Unassigned | 1299_0 | Clustered           | 53  | VC_1299_0 | 53  | 0.8666 | 1          | 0.8666 | 0 | 0 | 0 | 1      | ME   |
| S3_vf_70746   | Unassigned | Unassigned | Unassigned | 879_0  | Clustered           | 5   | VC_879_0  | 5   | 0.3611 | 0.99976884 | 0.3611 | 0 | 0 | 0 | 1      | ME   |
| S3_vf_73597   | Unassigned | Unassigned | Unassigned | 948_0  | Clustered           | 3   | VC_948_0  | 3   | 0.2818 | 0.99753105 | 0.2811 | 0 | 0 | 0 | 1      | ME   |
| S3_vf_80287   | Unassigned | Unassigned | Unassigned | 151_0  | Clustered           | 17  | VC_151_0  | 17  | 0.4863 | 1          | 0.4863 | 0 | 0 | 0 | 0.9779 | ME   |
| S3_vf_8058    | Unassigned | Unassigned | Unassigned | 723_0  | Clustered           | 20  | VC_723_0  | 20  | 0.7344 | 1          | 0.7344 | 0 | 0 | 0 | 0.7    | ME   |
| S3_vf_82571   | Unassigned | Unassigned | Unassigned | 1274_0 | Clustered           | 6   | VC_1274_0 | 6   | 0.494  | 1          | 0.494  | 0 | 0 | 0 | 1      | ME   |
| S3_vf_83536   | Unassigned | Unassigned | Unassigned | 1258_0 | Clustered           | 24  | VC_1258_0 | 24  | 0.4451 | 1          | 0.4451 | 0 | 0 | 0 | 1      | ME   |
| S3_vf_84832   | Unassigned | Unassigned | Unassigned | 1258_0 | Clustered           | 24  | VC_1258_0 | 24  | 0.4451 | 1          | 0.4451 | 0 | 0 | 0 | 1      | ME   |



|                                      |            |            |            |        |                     |     |           |     |        |            |        |   |   |   |        |      |
|--------------------------------------|------------|------------|------------|--------|---------------------|-----|-----------|-----|--------|------------|--------|---|---|---|--------|------|
| S3_vf_96222                          | Unassigned | Unassigned | Unassigned | 210_0  | Clustered           | 105 | VC_210_0  | 105 | 0.4076 | 1          | 0.4076 | 0 | 0 | 0 | 0.7766 | ME   |
| S3_vf_99734                          | Unassigned | Unassigned | Unassigned | 727_0  | Clustered           | 8   | VC_727_0  | 8   | 0.6106 | 1          | 0.6106 | 0 | 0 | 0 | 0.9286 | ME   |
| S3_vs_100785                         | Unassigned | Unassigned | Unassigned | 905_0  | Clustered           | 4   | VC_905_0  | 4   | 0.2789 | 0.99994112 | 0.2789 | 0 | 0 | 0 | 1      | ME   |
| S3_vs_108076                         | Unassigned | Unassigned | Unassigned | 152_0  | Clustered           | 10  | VC_152_0  | 10  | 0.6545 | 1          | 0.6545 | 0 | 0 | 0 | 0.8889 | ME   |
| S3_vs_114271                         | Unassigned | Unassigned | Unassigned | 1274_0 | Clustered           | 6   | VC_1274_0 | 6   | 0.494  | 1          | 0.494  | 0 | 0 | 0 | 1      | ME   |
| S3_vs_1143                           | Unassigned | Unassigned | Unassigned | 723_0  | Clustered           | 20  | VC_723_0  | 20  | 0.7344 | 1          | 0.7344 | 0 | 0 | 0 | 0.7    | ME   |
| S3_vs_117894                         | Unassigned | Unassigned | Unassigned | 1606_0 | Clustered           | 2   | VC_1606_0 | 2   | 0.7979 | 0.85557782 | 0.6827 | 0 | 0 | 0 | 1      | ME   |
| S3_vs_119605                         | Unassigned | Unassigned | Unassigned | 649_2  | Clustered           | 2   | VC_649_2  | 2   | 0.0766 | 0.95465816 | 0.0731 | 0 | 0 | 0 | 1      | ME   |
| S3_vs_119660                         | Unassigned | Unassigned | Unassigned | 695_0  | Clustered           | 17  | VC_695_0  | 17  | 0.7188 | 1          | 0.7188 | 0 | 0 | 0 | 0.9044 | ME   |
| S3_vs_123834                         | Unassigned | Unassigned | Unassigned | 878_0  | Clustered           | 2   | VC_878_0  | 2   | 0.2604 | 0.94178001 | 0.2453 | 0 | 0 | 0 | 1      | ME   |
| S3_vs_127387                         | Unassigned | Unassigned | Unassigned | 720_0  | Clustered           | 6   | VC_720_0  | 6   | 0.5406 | 0.99999978 | 0.5406 | 0 | 0 | 0 | 1      | ME   |
| S3_vs_127391                         | Unassigned | Unassigned | Unassigned | 641_0  | Clustered           | 2   | VC_641_0  | 2   | 0.239  | 0.95443988 | 0.2281 | 0 | 0 | 0 | 1      | ME   |
| S3_vs_127404                         | Unassigned | Unassigned | Unassigned | 855_0  | Clustered           | 12  | VC_855_0  | 12  | 0.6068 | 1          | 0.6068 | 0 | 0 | 0 | 1      | ME   |
| S3_vs_127413                         | Unassigned | Unassigned | Unassigned | 1045_0 | Clustered           | 2   | VC_1045_0 | 2   | 0.5958 | 0.92921057 | 0.5536 | 0 | 0 | 0 | 1      | ME   |
| S3_vs_127442                         | Unassigned | Unassigned | Unassigned | 1267_0 | Clustered           | 26  | VC_1267_0 | 26  | 0.9597 | 0.99999998 | 0.9597 | 0 | 0 | 0 | 1      | ME   |
| S3_vs_127445                         | Unassigned | Unassigned | Unassigned | 1490_1 | Clustered           | 6   | VC_1490_1 | 6   | 0.3734 | 1          | 0.3734 | 0 | 0 | 0 | 1      | ME   |
| S3_vs_12973                          | Unassigned | Unassigned | Unassigned | 1611_0 | Clustered           | 4   | VC_1611_0 | 4   | 0.5712 | 0.99972475 | 0.571  | 0 | 0 | 0 | 1      | ME   |
| S3_vs_12985                          | Unassigned | Unassigned | Unassigned | 1289_0 | Clustered           | 9   | VC_1289_0 | 9   | 0.4889 | 1          | 0.4889 | 0 | 0 | 0 | 0.7222 | ME   |
| S3_vs_16825                          | Unassigned | Unassigned | Unassigned | 1254_4 | Clustered/Singleton | 1   | VC_1254_4 | 1   | 0      | 1          | 0      | 0 | 0 | 0 | 1      | ME   |
| S3_vs_17168                          | Unassigned | Unassigned | Unassigned | 630_0  | Clustered           | 4   | VC_630_0  | 4   | 0.8863 | 0.99987744 | 0.8862 | 0 | 0 | 0 | 0.6667 | ME   |
| S3_vs_18858                          | Unassigned | Unassigned | Unassigned | 1291_0 | Clustered           | 18  | VC_1291_0 | 18  | 0.5095 | 1          | 0.5095 | 0 | 0 | 0 | 0.9542 | ME   |
| S3_vs_28402                          | Unassigned | Unassigned | Unassigned | 779_0  | Clustered           | 19  | VC_779_0  | 19  | 0.5105 | 1          | 0.5105 | 0 | 0 | 0 | 0.924  | ME   |
| S3_vs_29077                          | Unassigned | Unassigned | Unassigned | 643_0  | Clustered           | 2   | VC_643_0  | 2   | 0.0123 | 0.61707629 | 0.0076 | 0 | 0 | 0 | 1      | ME   |
| S3_vs_39774                          | Unassigned | Unassigned | Unassigned | 1582_1 | Clustered/Singleton | 1   | VC_1582_1 | 1   | 0      | 1          | 0      | 0 | 0 | 0 | 1      | ME   |
| S3_vs_42569                          | Unassigned | Unassigned | Unassigned | 728_0  | Clustered           | 7   | VC_728_0  | 7   | 0.2344 | 1          | 0.2344 | 0 | 0 | 0 | 0.8095 | ME   |
| S3_vs_45147                          | Unassigned | Unassigned | Unassigned | 1560_0 | Clustered           | 2   | VC_1560_0 | 2   | 0.9209 | 0.85557782 | 0.7879 | 0 | 0 | 0 | 1      | ME   |
| S3_vs_49835                          | Unassigned | Unassigned | Unassigned | 1291_0 | Clustered           | 18  | VC_1291_0 | 18  | 0.5095 | 1          | 0.5095 | 0 | 0 | 0 | 0.9542 | ME   |
| S3_vs_50924                          | Unassigned | Unassigned | Unassigned | 1613_0 | Clustered           | 3   | VC_1613_0 | 3   | 0.4581 | 0.98351531 | 0.4505 | 0 | 0 | 0 | 1      | ME   |
| S3_vs_54303                          | Unassigned | Unassigned | Unassigned | 723_0  | Clustered           | 20  | VC_723_0  | 20  | 0.7344 | 1          | 0.7344 | 0 | 0 | 0 | 0.7    | ME   |
| S3_vs_64424                          | Unassigned | Unassigned | Unassigned | 1063_0 | Clustered           | 2   | VC_1063_0 | 2   | 0.4174 | 0.93555746 | 0.3905 | 0 | 0 | 0 | 1      | ME   |
| S3_vs_68031                          | Unassigned | Unassigned | Unassigned | 1242_0 | Clustered/Singleton | 1   | VC_1242_0 | 1   | 0      | 1          | 0      | 0 | 0 | 0 | 1      | ME   |
| S3_vs_70508                          | Unassigned | Unassigned | Unassigned | 1572_0 | Clustered           | 3   | VC_1572_0 | 3   | 0.62   | 0.99423001 | 0.6164 | 0 | 0 | 0 | 1      | ME   |
| S3_vs_72118                          | Unassigned | Unassigned | Unassigned | 1570_0 | Clustered           | 7   | VC_1570_0 | 7   | 0.3986 | 0.99999956 | 0.3986 | 0 | 0 | 0 | 1      | ME   |
| S3_vs_73361                          | Unassigned | Unassigned | Unassigned | 1231_0 | Clustered           | 2   | VC_1231_0 | 2   | 0.6881 | 0.91813282 | 0.6318 | 0 | 0 | 0 | 1      | ME   |
| S3_vs_77156                          | Unassigned | Unassigned | Unassigned | 1267_0 | Clustered           | 26  | VC_1267_0 | 26  | 0.9597 | 0.99999998 | 0.9597 | 0 | 0 | 0 | 1      | ME   |
| S3_vs_80151                          | Unassigned | Unassigned | Unassigned | 1056_0 | Clustered           | 2   | VC_1056_0 | 2   | 0.1526 | 0.94372777 | 0.144  | 0 | 0 | 0 | 1      | ME   |
| S3_vs_81793                          | Unassigned | Unassigned | Unassigned | 1586_1 | Clustered/Singleton | 1   | VC_1586_1 | 1   | 0      | 1          | 0      | 0 | 0 | 0 | 1      | ME   |
| S3_vs_82895                          | Unassigned | Unassigned | Unassigned | 1055_1 | Clustered           | 3   | VC_1055_1 | 3   | 0.2077 | 0.97832531 | 0.2032 | 0 | 0 | 0 | 1      | ME   |
| S3_vs_89898                          | Unassigned | Unassigned | Unassigned | 855_0  | Clustered           | 12  | VC_855_0  | 12  | 0.6068 | 1          | 0.6068 | 0 | 0 | 0 | 1      | ME   |
| S3_vs_90341                          | Unassigned | Unassigned | Unassigned | 1620_0 | Clustered           | 2   | VC_1620_0 | 2   | 1      | 1          | 0      | 0 | 0 | 0 | 1      | ME   |
| S3_vs_95574                          | Unassigned | Unassigned | Unassigned | 1291_0 | Clustered           | 18  | VC_1291_0 | 18  | 0.5095 | 1          | 0.5095 | 0 | 0 | 0 | 0.9542 | ME   |
| S3_vs_98675                          | Unassigned | Unassigned | Unassigned | 747_0  | Clustered           | 2   | VC_747_0  | 2   | 0.5681 | 0.90610936 | 0.5147 | 0 | 0 | 0 | 1      | ME   |
| S4_vf_10506                          | Unassigned | Unassigned | Unassigned | 1617_0 | Clustered           | 2   | VC_1617_0 | 2   | 1      | 1          | 0      | 0 | 0 | 0 | 1      | SHHC |
| S4_vf_12614                          | Unassigned | Unassigned | Unassigned | 949_0  | Clustered           | 2   | VC_949_0  | 2   | 0.3686 | 0.94166128 | 0.3471 | 0 | 0 | 0 | 1      | SHHC |
| S4_vf_12624                          | Unassigned | Unassigned | Unassigned | 1195_0 | Clustered           | 2   | VC_1195_0 | 2   | 0.2264 | 0.96268605 | 0.218  | 0 | 0 | 0 | 1      | SHHC |
| S4_vf_13627                          | Unassigned | Unassigned | Unassigned | 1258_0 | Clustered           | 24  | VC_1258_0 | 24  | 0.4451 | 1          | 0.4451 | 0 | 0 | 0 | 1      | SHHC |
| S4_vf_13759                          | Unassigned | Unassigned | Unassigned | 667_0  | Clustered           | 12  | VC_667_0  | 12  | 0.2907 | 0.99999999 | 0.2907 | 0 | 0 | 0 | 1      | SHHC |
| S4_vf_18803                          | Unassigned | Unassigned | Unassigned | 1044_0 | Clustered           | 5   | VC_1044_0 | 5   | 0.757  | 0.99999838 | 0.757  | 0 | 0 | 0 | 1      | SHHC |
| S4_vf_22219                          | Unassigned | Unassigned | Unassigned | 995_0  | Clustered           | 2   | VC_995_0  | 2   | 0.627  | 0.85557782 | 0.5365 | 0 | 0 | 0 | 1      | SHHC |
| S4_vf_2524                           | Unassigned | Unassigned | Unassigned | 946_0  | Clustered           | 7   | VC_946_0  | 7   | 0.8307 | 0.99999953 | 0.8307 | 0 | 0 | 0 | 1      | SHHC |
| S4_vf_26417                          | Unassigned | Unassigned | Unassigned | 693_0  | Clustered           | 4   | VC_693_0  | 4   | 0.3    | 0.99997992 | 0.3    | 0 | 0 | 0 | 1      | SHHC |
| S4_vf_27861                          | Unassigned | Unassigned | Unassigned | 1490_0 | Clustered           | 6   | VC_1490_0 | 6   | 0.4379 | 1          | 0.4379 | 0 | 0 | 0 | 1      | SHHC |
| S4_vf_28601                          | Unassigned | Unassigned | Unassigned | 879_0  | Clustered           | 5   | VC_879_0  | 5   | 0.3611 | 0.99976884 | 0.3611 | 0 | 0 | 0 | 1      | SHHC |
| S4_vf_31973                          | Unassigned | Unassigned | Unassigned | 490_2  | Clustered/Singleton | 1   | VC_490_2  | 1   | 0      | 1          | 0      | 0 | 0 | 0 | 1      | SHHC |
| S4_vf_31978                          | Unassigned | Unassigned | Unassigned | 1254_1 | Clustered           | 2   | VC_1254_1 | 2   | 0.1731 | 0.94988795 | 0.1644 | 0 | 0 | 0 | 1      | SHHC |
| S4_vf_31981                          | Unassigned | Unassigned | Unassigned | 519_10 | Clustered           | 2   | VC_519_10 | 2   | 0.0437 | 0.9538552  | 0.0417 | 0 | 0 | 0 | 1      | SHHC |
| S4_vf_4838                           | Unassigned | Unassigned | Unassigned | 519_11 | Clustered           | 7   | VC_519_11 | 7   | 0.2104 | 1          | 0.2104 | 0 | 0 | 0 | 0.7619 | SHHC |
| S4_vf_4891                           | Unassigned | Unassigned | Unassigned | 1561_0 | Clustered           | 2   | VC_1561_0 | 2   | 0.6315 | 0.9262493  | 0.585  | 0 | 0 | 0 | 1      | SHHC |
| S4_vf_5021                           | Unassigned | Unassigned | Unassigned | 1258_0 | Clustered           | 24  | VC_1258_0 | 24  | 0.4451 | 1          | 0.4451 | 0 | 0 | 0 | 1      | SHHC |
| S4_vs_VIRSorter_1135-cat_2           | Unassigned | Unassigned | Unassigned | 151_0  | Clustered           | 17  | VC_151_0  | 17  | 0.4863 | 1          | 0.4863 | 0 | 0 | 0 | 0.9779 | SHHC |
| S4_vs_VIRSorter_12831-circular-cat_2 | Unassigned | Unassigned | Unassigned | 779_0  | Clustered           | 19  | VC_779_0  | 19  | 0.5105 | 1          | 0.5105 | 0 | 0 | 0 | 0.924  | SHHC |
| S4_vs_VIRSorter_13190-cat_2          | Unassigned | Unassigned | Unassigned | 1056_0 | Clustered           | 2   | VC_1056_0 | 2   | 0.1526 | 0.94372777 | 0.144  | 0 | 0 | 0 | 1      | SHHC |
| S4_vs_VIRSorter_13488-cat_2          | Unassigned | Unassigned | Unassigned | 1611_0 | Clustered           | 4   | VC_1611_0 | 4   | 0.5712 | 0.99972475 | 0.571  | 0 | 0 | 0 | 1      | SHHC |
| S4_vs_VIRSorter_15112-cat_2          | Unassigned | Unassigned | Unassigned | 1604_0 | Clustered           | 2   | VC_1604_0 | 2   | 0.3203 | 0.92921057 | 0.2977 | 0 | 0 | 0 | 1      | SHHC |
| S4_vs_VIRSorter_15837-cat_2          | Unassigned | Unassigned | Unassigned | 152_0  | Clustered           | 10  | VC_152_0  | 10  | 0.6545 | 1          | 0.6545 | 0 | 0 | 0 | 0.8889 | SHHC |
| S4_vs_VIRSorter_16493-cat_2          | Unassigned | Unassigned | Unassigned | 876_0  | Clustered           | 2   | VC_876_0  | 2   | 0.4559 | 0.94489191 | 0.4308 | 0 | 0 | 0 | 1      | SHHC |
| S4_vs_VIRSorter_19324-cat_2          | Unassigned | Unassigned | Unassigned | 1149_0 | Clustered           | 3   | VC_1149_0 | 3   | 0.5474 | 0.99645906 | 0.5454 | 0 | 0 | 0 | 1      | SHHC |
| S4_vs_VIRSorter_3006-cat_1           | Unassigned | Unassigned | Unassigned | 1085_1 | Clustered           | 19  | VC_1085_1 | 19  | 0.5328 | 1          | 0.5328 | 0 | 0 | 0 | 0.8947 | SHHC |
| S4_vs_VIRSorter_30222-cat_2          | Unassigned | Unassigned | Unassigned | 1085_0 | Clustered           | 2   | VC_1085_0 | 2   | 0.0548 | 0.95404357 | 0.0523 | 0 | 0 | 0 | 1      | SHHC |
| S4_vs_VIRSorter_31171-circular-cat_2 | Unassigned | Unassigned | Unassigned | 923_0  | Clustered           | 7   | VC_923_0  | 7   | 0.1207 | 0.99951443 | 0.1206 | 0 | 0 | 0 | 0.9524 | SHHC |
| S4_vs_VIRSorter_31196-circular-cat_2 | Unassigned | Unassigned | Unassigned | 1481_0 | Clustered           | 3   | VC_1481_0 | 3   | 0.107  | 0.99563585 | 0.1065 | 0 | 0 | 0 | 0.6667 | SHHC |
| S4_vs_VIRSorter_31560-circular-cat_2 | Unassigned | Unassigned | Unassigned | 1481_1 | Clustered           | 2   | VC_1481_1 | 2   | 0.0914 | 0.95495464 | 0.0873 | 0 | 0 | 0 | 1      | SHHC |
| S4_vs_VIRSorter_31975-circular-cat_1 | Unassigned | Unassigned | Unassigned | 948_1  | Clustered/Singleton | 1   | VC_948_1  | 1   | 0      | 1          | 0      | 0 | 0 | 0 | 1      | SHHC |
| S4_vs_VIRSorter_31976-circular-cat_2 | Unassigned | Unassigned | Unassigned | 641_0  | Clustered           | 2   | VC_641_0  | 2   | 0.239  | 0.95443988 | 0.2281 | 0 | 0 | 0 | 1      | SHHC |
| S4_vs_VIRSorter_31977-circular-cat_2 | Unassigned | Unassigned | Unassigned | 923_0  | Clustered           | 7   | VC_923_0  | 7   | 0.1207 | 0.99951443 | 0.1206 | 0 | 0 | 0 | 0.9524 | SHHC |
| S4_vs_VIRSorter_31980-circular-cat_2 | Unassigned | Unassigned | Unassigned | 249_1  | Clustered           | 21  | VC_249_1  | 21  | 0.6775 | 1          | 0.6775 | 0 | 0 | 0 | 0.8476 | SHHC |
| S4_vs_VIRSorter_4746-cat_2           | Unassigned | Unassigned | Unassigned | 1265_0 | Clustered           | 2   | VC_1265_0 | 2   | 0.2124 | 0.95447702 | 0.2027 | 0 | 0 | 0 | 1      | SHHC |
| S4_vs_VIRSorter_4839-cat_2           | Unassigned | Unassigned | Unassigned | 1085_1 | Clustered           | 19  | VC_1085_1 | 19  | 0.5328 | 1          | 0.5328 | 0 | 0 | 0 | 0.8947 | SHHC |
| S4_vs_VIRSorter_4959-cat_2           | Unassigned | Unassigned | Unassigned | 670_0  | Clustered           | 4   | VC_670_0  | 4   | 0.4145 | 0.99998287 | 0.4145 | 0 | 0 | 0 | 1      | SHHC |
| S4_vs_VIRSorter_6022-circular-cat_1  | Unassigned | Unassigned | Unassigned | 855_0  | Clustered           | 12  | VC_855_0  | 12  | 0.6068 | 1          | 0.6068 | 0 | 0 | 0 | 1      | SHHC |
| S4_vs_VIRSorter_7386-circular-cat_2  | Unassigned | Unassigned | Unassigned | 723_0  | Clustered           | 20  | VC_723_0  | 20  | 0.7344 | 1          | 0.7344 | 0 | 0 | 0 | 0.7    | SHHC |



|                            |            |            |            |        |                     |              |     |        |            |        |   |   |   |        |      |
|----------------------------|------------|------------|------------|--------|---------------------|--------------|-----|--------|------------|--------|---|---|---|--------|------|
| S4_vs_VIRSorter_8622-cat_2 | Unassigned | Unassigned | Unassigned | 727_0  | Clustered           | 8 VC_727_0   | 8   | 0.6106 | 1          | 0.6106 | 0 | 0 | 0 | 0.9286 | SHHC |
| S4_vs_VIRSorter_9913-cat_1 | Unassigned | Unassigned | Unassigned | 855_0  | Clustered           | 12 VC_855_0  | 12  | 0.6068 | 1          | 0.6068 | 0 | 0 | 0 | 1      | SHHC |
| SS_vf_110171               | Unassigned | Unassigned | Unassigned | 1552_0 | Clustered           | 9 VC_1552_0  | 9   | 0.5828 | 1          | 0.5828 | 0 | 0 | 0 | 0.8056 | ME   |
| SS_vf_11450                | Unassigned | Unassigned | Unassigned | 778_0  | Clustered           | 13 VC_778_0  | 13  | 0.2581 | 1          | 0.2581 | 0 | 0 | 0 | 0.9359 | ME   |
| SS_vf_122568               | Unassigned | Unassigned | Unassigned | 732_0  | Clustered           | 3 VC_732_0   | 3   | 0.1816 | 0.99843576 | 0.1813 | 0 | 0 | 0 | 1      | ME   |
| SS_vf_123990               | Unassigned | Unassigned | Unassigned | 1258_0 | Clustered           | 24 VC_1258_0 | 24  | 0.4451 | 1          | 0.4451 | 0 | 0 | 0 | 1      | ME   |
| SS_vf_134040               | Unassigned | Unassigned | Unassigned | 1288_0 | Clustered           | 7 VC_1288_0  | 7   | 0.9846 | 0.99997693 | 0.9846 | 0 | 0 | 0 | 1      | ME   |
| SS_vf_136076               | Unassigned | Unassigned | Unassigned | 1552_0 | Clustered           | 9 VC_1552_0  | 9   | 0.5828 | 1          | 0.5828 | 0 | 0 | 0 | 0.8056 | ME   |
| SS_vf_137260               | Unassigned | Unassigned | Unassigned | 1549_0 | Clustered           | 5 VC_1549_0  | 5   | 0.6422 | 0.99998224 | 0.6421 | 0 | 0 | 0 | 1      | ME   |
| SS_vf_145579               | Unassigned | Unassigned | Unassigned | 1079_2 | Clustered/Singleton | 1 VC_1079_2  | 1   | 0      | 1          | 0      | 0 | 0 | 0 | 1      | ME   |
| SS_vf_145585               | Unassigned | Unassigned | Unassigned | 638_0  | Clustered           | 2 VC_638_0   | 2   | 0.0686 | 0.56281647 | 0.0386 | 0 | 0 | 0 | 1      | ME   |
| SS_vf_145588               | Unassigned | Unassigned | Unassigned | 921_0  | Clustered           | 4 VC_921_0   | 4   | 0.6171 | 0.99994641 | 0.6171 | 0 | 0 | 0 | 1      | ME   |
| SS_vf_18461                | Unassigned | Unassigned | Unassigned | 951_1  | Clustered           | 2 VC_951_1   | 2   | 0.1168 | 0.95092252 | 0.1111 | 0 | 0 | 0 | 1      | ME   |
| SS_vf_25423                | Unassigned | Unassigned | Unassigned | 210_0  | Clustered           | 105 VC_210_0 | 105 | 0.4076 | 1          | 0.4076 | 0 | 0 | 0 | 0.7766 | ME   |
| SS_vf_28061                | Unassigned | Unassigned | Unassigned | 430_0  | Clustered           | 2 VC_430_0   | 2   | 0.2142 | 0.87713065 | 0.1878 | 0 | 0 | 0 | 1      | ME   |
| SS_vf_55415                | Unassigned | Unassigned | Unassigned | 1054_1 | Clustered           | 8 VC_1054_1  | 8   | 0.3937 | 1          | 0.3937 | 0 | 0 | 0 | 0.9286 | ME   |
| SS_vf_6032                 | Unassigned | Unassigned | Unassigned | 1511_0 | Clustered           | 3 VC_1511_0  | 3   | 0.9946 | 0.92554266 | 0.9205 | 0 | 0 | 0 | 1      | ME   |
| SS_vf_6506                 | Unassigned | Unassigned | Unassigned | 923_0  | Clustered           | 7 VC_923_0   | 7   | 0.1207 | 0.99951443 | 0.1206 | 0 | 0 | 0 | 0.9524 | ME   |
| SS_vf_67622                | Unassigned | Unassigned | Unassigned | 1079_1 | Clustered/Singleton | 1 VC_1079_1  | 1   | 0      | 1          | 0      | 0 | 0 | 0 | 1      | ME   |
| SS_vf_74661                | Unassigned | Unassigned | Unassigned | 492_0  | Clustered           | 20 VC_492_0  | 20  | 0.7887 | 1          | 0.7887 | 0 | 0 | 0 | 1      | ME   |
| SS_vf_77701                | Unassigned | Unassigned | Unassigned | 826_0  | Clustered           | 7 VC_826_0   | 7   | 0.0509 | 0.99909926 | 0.0508 | 0 | 0 | 0 | 1      | ME   |
| SS_vf_8965                 | Unassigned | Unassigned | Unassigned | 1505_0 | Clustered           | 7 VC_1505_0  | 7   | 0.4784 | 0.99999946 | 0.4784 | 0 | 0 | 0 | 0.9048 | ME   |
| SS_vs_107105               | Unassigned | Unassigned | Unassigned | 724_0  | Clustered           | 6 VC_724_0   | 6   | 0.1907 | 1          | 0.1907 | 0 | 0 | 0 | 1      | ME   |
| SS_vs_109527               | Unassigned | Unassigned | Unassigned | 1612_3 | Clustered/Singleton | 1 VC_1612_3  | 1   | 0      | 1          | 0      | 0 | 0 | 0 | 1      | ME   |
| SS_vs_116235               | Unassigned | Unassigned | Unassigned | 905_0  | Clustered           | 4 VC_905_0   | 4   | 0.2789 | 0.99994112 | 0.2789 | 0 | 0 | 0 | 1      | ME   |
| SS_vs_120079               | Unassigned | Unassigned | Unassigned | 1252_0 | Clustered           | 2 VC_1252_0  | 2   | 0.1373 | 0.95236699 | 0.1307 | 0 | 0 | 0 | 1      | ME   |
| SS_vs_121419               | Unassigned | Unassigned | Unassigned | 1570_0 | Clustered           | 7 VC_1570_0  | 7   | 0.3986 | 0.99999956 | 0.3986 | 0 | 0 | 0 | 1      | ME   |
| SS_vs_122344               | Unassigned | Unassigned | Unassigned | 1252_1 | Clustered/Singleton | 1 VC_1252_1  | 1   | 0      | 1          | 0      | 0 | 0 | 0 | 1      | ME   |
| SS_vs_123256               | Unassigned | Unassigned | Unassigned | 695_0  | Clustered           | 17 VC_695_0  | 17  | 0.7188 | 1          | 0.7188 | 0 | 0 | 0 | 0.9044 | ME   |
| SS_vs_124035               | Unassigned | Unassigned | Unassigned | 1614_0 | Clustered           | 3 VC_1614_0  | 3   | 1      | 1          | 1      | 0 | 0 | 0 | 1      | ME   |
| SS_vs_124677               | Unassigned | Unassigned | Unassigned | 728_1  | Clustered/Singleton | 1 VC_728_1   | 1   | 0      | 1          | 0      | 0 | 0 | 0 | 1      | ME   |
| SS_vs_129970               | Unassigned | Unassigned | Unassigned | 1572_0 | Clustered           | 3 VC_1572_0  | 3   | 0.62   | 0.99423001 | 0.6164 | 0 | 0 | 0 | 1      | ME   |
| SS_vs_13090                | Unassigned | Unassigned | Unassigned | 1587_0 | Clustered           | 5 VC_1587_0  | 5   | 0.602  | 0.99999964 | 0.602  | 0 | 0 | 0 | 1      | ME   |
| SS_vs_130958               | Unassigned | Unassigned | Unassigned | 732_0  | Clustered           | 3 VC_732_0   | 3   | 0.1816 | 0.99843576 | 0.1813 | 0 | 0 | 0 | 1      | ME   |
| SS_vs_131510               | Unassigned | Unassigned | Unassigned | 695_1  | Clustered/Singleton | 1 VC_695_1   | 1   | 0      | 1          | 0      | 0 | 0 | 0 | 1      | ME   |
| SS_vs_1338                 | Unassigned | Unassigned | Unassigned | 1582_0 | Clustered           | 2 VC_1582_0  | 2   | 0.22   | 0.91237788 | 0.2007 | 0 | 0 | 0 | 1      | ME   |
| SS_vs_136679               | Unassigned | Unassigned | Unassigned | 1291_0 | Clustered           | 18 VC_1291_0 | 18  | 0.5095 | 1          | 0.5095 | 0 | 0 | 0 | 0.9542 | ME   |
| SS_vs_137154               | Unassigned | Unassigned | Unassigned | 747_0  | Clustered           | 2 VC_747_0   | 2   | 0.5681 | 0.90610936 | 0.5147 | 0 | 0 | 0 | 1      | ME   |
| SS_vs_138980               | Unassigned | Unassigned | Unassigned | 660_0  | Clustered           | 2 VC_660_0   | 2   | 0.0368 | 0.95624697 | 0.0352 | 0 | 0 | 0 | 1      | ME   |
| SS_vs_139401               | Unassigned | Unassigned | Unassigned | 1587_0 | Clustered           | 5 VC_1587_0  | 5   | 0.602  | 0.99999964 | 0.602  | 0 | 0 | 0 | 1      | ME   |
| SS_vs_140946               | Unassigned | Unassigned | Unassigned | 1613_0 | Clustered           | 3 VC_1613_0  | 3   | 0.4581 | 0.98351531 | 0.4505 | 0 | 0 | 0 | 1      | ME   |
| SS_vs_142195               | Unassigned | Unassigned | Unassigned | 1605_0 | Clustered           | 2 VC_1605_0  | 2   | 0.709  | 0.87921671 | 0.6234 | 0 | 0 | 0 | 1      | ME   |
| SS_vs_142450               | Unassigned | Unassigned | Unassigned | 1261_0 | Clustered           | 14 VC_1261_0 | 14  | 0.3712 | 1          | 0.3712 | 0 | 0 | 0 | 1      | ME   |
| SS_vs_145026               | Unassigned | Unassigned | Unassigned | 1291_0 | Clustered           | 18 VC_1291_0 | 18  | 0.5095 | 1          | 0.5095 | 0 | 0 | 0 | 0.9542 | ME   |
| SS_vs_145581               | Unassigned | Unassigned | Unassigned | 658_0  | Clustered           | 3 VC_658_0   | 3   | 0.1319 | 0.99006448 | 0.1305 | 0 | 0 | 0 | 0.6667 | ME   |
| SS_vs_145590               | Unassigned | Unassigned | Unassigned | 278_0  | Clustered           | 11 VC_278_0  | 11  | 0.4188 | 1          | 0.4188 | 0 | 0 | 0 | 0.8    | ME   |
| SS_vs_145592               | Unassigned | Unassigned | Unassigned | 1554_0 | Clustered           | 5 VC_1554_0  | 5   | 0.1182 | 0.99926768 | 0.1181 | 0 | 0 | 0 | 0.7    | ME   |
| SS_vs_145593               | Unassigned | Unassigned | Unassigned | 1615_0 | Clustered           | 2 VC_1615_0  | 2   | 0.3719 | 0.85557782 | 0.3182 | 0 | 0 | 0 | 1      | ME   |
| SS_vs_145597               | Unassigned | Unassigned | Unassigned | 724_0  | Clustered           | 6 VC_724_0   | 6   | 0.1907 | 1          | 0.1907 | 0 | 0 | 0 | 1      | ME   |
| SS_vs_145598               | Unassigned | Unassigned | Unassigned | 151_0  | Clustered           | 17 VC_151_0  | 17  | 0.4863 | 1          | 0.4863 | 0 | 0 | 0 | 0.9779 | ME   |
| SS_vs_145599               | Unassigned | Unassigned | Unassigned | 278_0  | Clustered           | 11 VC_278_0  | 11  | 0.4188 | 1          | 0.4188 | 0 | 0 | 0 | 0.8    | ME   |
| SS_vs_145601               | Unassigned | Unassigned | Unassigned | 152_0  | Clustered           | 10 VC_152_0  | 10  | 0.6545 | 1          | 0.6545 | 0 | 0 | 0 | 0.8889 | ME   |
| SS_vs_145602               | Unassigned | Unassigned | Unassigned | 278_0  | Clustered           | 11 VC_278_0  | 11  | 0.4188 | 1          | 0.4188 | 0 | 0 | 0 | 0.8    | ME   |
| SS_vs_145605               | Unassigned | Unassigned | Unassigned | 946_0  | Clustered           | 7 VC_946_0   | 7   | 0.8307 | 0.99999953 | 0.8307 | 0 | 0 | 0 | 1      | ME   |
| SS_vs_1572                 | Unassigned | Unassigned | Unassigned | 855_0  | Clustered           | 12 VC_855_0  | 12  | 0.6068 | 1          | 0.6068 | 0 | 0 | 0 | 1      | ME   |
| SS_vs_17520                | Unassigned | Unassigned | Unassigned | 1587_0 | Clustered           | 5 VC_1587_0  | 5   | 0.602  | 0.99999964 | 0.602  | 0 | 0 | 0 | 1      | ME   |
| SS_vs_20268                | Unassigned | Unassigned | Unassigned | 349_0  | Clustered           | 5 VC_349_0   | 5   | 0.191  | 0.97099341 | 0.1855 | 0 | 0 | 0 | 1      | ME   |
| SS_vs_20500                | Unassigned | Unassigned | Unassigned | 630_0  | Clustered           | 4 VC_630_0   | 4   | 0.8863 | 0.99987744 | 0.8862 | 0 | 0 | 0 | 0.6667 | ME   |
| SS_vs_28263                | Unassigned | Unassigned | Unassigned | 1587_0 | Clustered           | 5 VC_1587_0  | 5   | 0.602  | 0.99999964 | 0.602  | 0 | 0 | 0 | 1      | ME   |
| SS_vs_2876                 | Unassigned | Unassigned | Unassigned | 278_0  | Clustered           | 11 VC_278_0  | 11  | 0.4188 | 1          | 0.4188 | 0 | 0 | 0 | 0.8    | ME   |
| SS_vs_3183                 | Unassigned | Unassigned | Unassigned | 782_0  | Clustered           | 5 VC_782_0   | 5   | 0.6682 | 0.99988829 | 0.6682 | 0 | 0 | 0 | 1      | ME   |
| SS_vs_3501                 | Unassigned | Unassigned | Unassigned | 1035_0 | Clustered           | 2 VC_1035_0  | 2   | 0.4399 | 0.94022524 | 0.4136 | 0 | 0 | 0 | 1      | ME   |
| SS_vs_38949                | Unassigned | Unassigned | Unassigned | 723_0  | Clustered           | 20 VC_723_0  | 20  | 0.7344 | 1          | 0.7344 | 0 | 0 | 0 | 0.7    | ME   |
| SS_vs_40848                | Unassigned | Unassigned | Unassigned | 649_0  | Clustered           | 2 VC_649_0   | 2   | 0.1474 | 0.95329905 | 0.1405 | 0 | 0 | 0 | 1      | ME   |
| SS_vs_49480                | Unassigned | Unassigned | Unassigned | 778_0  | Clustered           | 13 VC_778_0  | 13  | 0.2581 | 1          | 0.2581 | 0 | 0 | 0 | 0.9359 | ME   |
| SS_vs_56083                | Unassigned | Unassigned | Unassigned | 1274_0 | Clustered           | 6 VC_1274_0  | 6   | 0.494  | 1          | 0.494  | 0 | 0 | 0 | 1      | ME   |
| SS_vs_58766                | Unassigned | Unassigned | Unassigned | 923_0  | Clustered           | 7 VC_923_0   | 7   | 0.1207 | 0.99951443 | 0.1206 | 0 | 0 | 0 | 0.9524 | ME   |
| SS_vs_58859                | Unassigned | Unassigned | Unassigned | 779_0  | Clustered           | 19 VC_779_0  | 19  | 0.5105 | 1          | 0.5105 | 0 | 0 | 0 | 0.924  | ME   |
| SS_vs_63924                | Unassigned | Unassigned | Unassigned | 879_0  | Clustered           | 5 VC_879_0   | 5   | 0.3611 | 0.99976884 | 0.3611 | 0 | 0 | 0 | 1      | ME   |
| SS_vs_67958                | Unassigned | Unassigned | Unassigned | 1554_0 | Clustered           | 5 VC_1554_0  | 5   | 0.1182 | 0.99926768 | 0.1181 | 0 | 0 | 0 | 0.7    | ME   |
| SS_vs_69083                | Unassigned | Unassigned | Unassigned | 696_0  | Clustered           | 3 VC_696_0   | 3   | 0.3671 | 0.99816718 | 0.3664 | 0 | 0 | 0 | 1      | ME   |
| SS_vs_74199                | Unassigned | Unassigned | Unassigned | 1291_0 | Clustered           | 18 VC_1291_0 | 18  | 0.5095 | 1          | 0.5095 | 0 | 0 | 0 | 0.9542 | ME   |
| SS_vs_7444                 | Unassigned | Unassigned | Unassigned | 1614_0 | Clustered           | 3 VC_1614_0  | 3   | 1      | 1          | 1      | 0 | 0 | 0 | 1      | ME   |
| SS_vs_76500                | Unassigned | Unassigned | Unassigned | 695_0  | Clustered           | 17 VC_695_0  | 17  | 0.7188 | 1          | 0.7188 | 0 | 0 | 0 | 0.9044 | ME   |
| SS_vs_77593                | Unassigned | Unassigned | Unassigned | 151_1  | Clustered/Singleton | 1 VC_151_1   | 1   | 0      | 1          | 0      | 0 | 0 | 0 | 1      | ME   |
| SS_vs_79992                | Unassigned | Unassigned | Unassigned | 696_0  | Clustered           | 3 VC_696_0   | 3   | 0.3671 | 0.99816718 | 0.3664 | 0 | 0 | 0 | 1      | ME   |
| SS_vs_80498                | Unassigned | Unassigned | Unassigned | 278_0  | Clustered           | 11 VC_278_0  | 11  | 0.4188 | 1          | 0.4188 | 0 | 0 | 0 | 0.8    | ME   |
| SS_vs_83886                | Unassigned | Unassigned | Unassigned | 920_0  | Clustered           | 2 VC_920_0   | 2   | 0.1084 | 0.86113896 | 0.0934 | 0 | 0 | 0 | 1      | ME   |
| SS_vs_84946                | Unassigned | Unassigned | Unassigned | 332_0  | Clustered           | 3 VC_332_0   | 3   | 0.1832 | 0.99801912 | 0.1828 | 0 | 0 | 0 | 1      | ME   |
| SS_vs_85065                | Unassigned | Unassigned | Unassigned | 1085_1 | Clustered           | 19 VC_1085_1 | 19  | 0.5328 | 1          | 0.5328 | 0 | 0 | 0 | 0.8947 | ME   |
| SS_vs_86562                | Unassigned | Unassigned | Unassigned | 752_0  | Clustered           | 2 VC_752_0   | 2   | 0.6495 | 0.85557782 | 0.5557 | 0 | 0 | 0 | 1      | ME   |



|              |            |            |            |        |                     |              |    |        |            |        |   |   |   |        |      |
|--------------|------------|------------|------------|--------|---------------------|--------------|----|--------|------------|--------|---|---|---|--------|------|
| S5_vs_8847   | Unassigned | Unassigned | Unassigned | 649_1  | Clustered           | 14 VC_649_1  | 14 | 0.5226 | 1          | 0.5226 | 0 | 0 | 0 | 0.8352 | ME   |
| S5_vs_93839  | Unassigned | Unassigned | Unassigned | 694_0  | Clustered           | 2 VC_694_0   | 2  | 0.1836 | 0.94940611 | 0.1743 | 0 | 0 | 0 | 1      | ME   |
| S5_vs_9747   | Unassigned | Unassigned | Unassigned | 1595_0 | Clustered           | 2 VC_1595_0  | 2  | 0.48   | 0.85557782 | 0.4107 | 0 | 0 | 0 | 1      | ME   |
| S5_vs_97574  | Unassigned | Unassigned | Unassigned | 219_1  | Clustered/Singleton | 1 VC_219_1   | 1  | 0      | 1          | 0      | 0 | 0 | 0 | 1      | ME   |
| S6_vf_25710  | Unassigned | Unassigned | Unassigned | 750_0  | Clustered           | 2 VC_750_0   | 2  | 0.9721 | 0.5        | 0.4861 | 0 | 0 | 0 | 1      | SHHC |
| S6_vf_3435   | Unassigned | Unassigned | Unassigned | 706_0  | Clustered           | 52 VC_706_0  | 52 | 0.9787 | 1          | 0.9787 | 0 | 0 | 0 | 1      | SHHC |
| S6_vf_45228  | Unassigned | Unassigned | Unassigned | 1261_0 | Clustered           | 14 VC_1261_0 | 14 | 0.3712 | 1          | 0.3712 | 0 | 0 | 0 | 1      | SHHC |
| S6_vf_45618  | Unassigned | Unassigned | Unassigned | 1421_0 | Clustered           | 4 VC_1421_0  | 4  | 0.3219 | 0.99997685 | 0.3219 | 0 | 0 | 0 | 0.8333 | SHHC |
| S6_vf_56486  | Unassigned | Unassigned | Unassigned | 963_0  | Clustered           | 4 VC_963_0   | 4  | 0.2848 | 0.99994144 | 0.2848 | 0 | 0 | 0 | 0.8333 | SHHC |
| S6_vf_6314   | Unassigned | Unassigned | Unassigned | 1607_0 | Clustered           | 11 VC_1607_0 | 11 | 0.7884 | 0.99037182 | 0.7808 | 0 | 0 | 0 | 1      | SHHC |
| S6_vs_10314  | Unassigned | Unassigned | Unassigned | 1289_0 | Clustered           | 9 VC_1289_0  | 9  | 0.4889 | 1          | 0.4889 | 0 | 0 | 0 | 0.7222 | SHHC |
| S6_vs_12945  | Unassigned | Unassigned | Unassigned | 670_0  | Clustered           | 4 VC_670_0   | 4  | 0.4145 | 0.99998287 | 0.4145 | 0 | 0 | 0 | 1      | SHHC |
| S6_vs_15813  | Unassigned | Unassigned | Unassigned | 1481_0 | Clustered           | 3 VC_1481_0  | 3  | 0.107  | 0.99563585 | 0.1065 | 0 | 0 | 0 | 0.6667 | SHHC |
| S6_vs_29152  | Unassigned | Unassigned | Unassigned | 923_2  | Clustered/Singleton | 1 VC_923_2   | 1  | 0      | 1          | 0      | 0 | 0 | 0 | 1      | SHHC |
| S6_vs_32886  | Unassigned | Unassigned | Unassigned | 1590_0 | Clustered           | 2 VC_1590_0  | 2  | 0.1962 | 0.92921057 | 0.1823 | 0 | 0 | 0 | 1      | SHHC |
| S6_vs_33711  | Unassigned | Unassigned | Unassigned | 667_0  | Clustered           | 12 VC_667_0  | 12 | 0.2907 | 0.99999999 | 0.2907 | 0 | 0 | 0 | 1      | SHHC |
| S6_vs_38250  | Unassigned | Unassigned | Unassigned | 667_0  | Clustered           | 12 VC_667_0  | 12 | 0.2907 | 0.99999999 | 0.2907 | 0 | 0 | 0 | 1      | SHHC |
| S6_vs_39025  | Unassigned | Unassigned | Unassigned | 670_0  | Clustered           | 4 VC_670_0   | 4  | 0.4145 | 0.99998287 | 0.4145 | 0 | 0 | 0 | 1      | SHHC |
| S6_vs_46039  | Unassigned | Unassigned | Unassigned | 1612_0 | Clustered           | 2 VC_1612_0  | 2  | 0.2514 | 0.92921057 | 0.2336 | 0 | 0 | 0 | 1      | SHHC |
| S6_vs_54606  | Unassigned | Unassigned | Unassigned | 1289_0 | Clustered           | 9 VC_1289_0  | 9  | 0.4889 | 1          | 0.4889 | 0 | 0 | 0 | 0.7222 | SHHC |
| S6_vs_56490  | Unassigned | Unassigned | Unassigned | 778_0  | Clustered           | 13 VC_778_0  | 13 | 0.2581 | 1          | 0.2581 | 0 | 0 | 0 | 0.9359 | SHHC |
| S6_vs_56491  | Unassigned | Unassigned | Unassigned | 278_0  | Clustered           | 11 VC_278_0  | 11 | 0.4188 | 1          | 0.4188 | 0 | 0 | 0 | 0.8    | SHHC |
| S6_vs_56493  | Unassigned | Unassigned | Unassigned | 1601_0 | Clustered           | 2 VC_1601_0  | 2  | 0.7965 | 0.81445332 | 0.6487 | 0 | 0 | 0 | 1      | SHHC |
| S6_vs_56496  | Unassigned | Unassigned | Unassigned | 723_0  | Clustered           | 20 VC_723_0  | 20 | 0.7344 | 1          | 0.7344 | 0 | 0 | 0 | 0.7    | SHHC |
| S6_vs_56498  | Unassigned | Unassigned | Unassigned | 1289_0 | Clustered           | 9 VC_1289_0  | 9  | 0.4889 | 1          | 0.4889 | 0 | 0 | 0 | 0.7222 | SHHC |
| S6_vs_9784   | Unassigned | Unassigned | Unassigned | 1505_0 | Clustered           | 7 VC_1505_0  | 7  | 0.4784 | 0.99999946 | 0.4784 | 0 | 0 | 0 | 0.9048 | SHHC |
| S7_vf_114476 | Unassigned | Unassigned | Unassigned | 720_0  | Clustered           | 6 VC_720_0   | 6  | 0.5406 | 0.99999978 | 0.5406 | 0 | 0 | 0 | 1      | ME   |
| S7_vf_117697 | Unassigned | Unassigned | Unassigned | 1576_0 | Clustered           | 5 VC_1576_0  | 5  | 0.7068 | 0.99999939 | 0.7068 | 0 | 0 | 0 | 1      | ME   |
| S7_vf_134023 | Unassigned | Unassigned | Unassigned | 1590_0 | Clustered           | 2 VC_1590_0  | 2  | 0.1962 | 0.92921057 | 0.1823 | 0 | 0 | 0 | 1      | ME   |
| S7_vf_135778 | Unassigned | Unassigned | Unassigned | 946_0  | Clustered           | 7 VC_946_0   | 7  | 0.8307 | 0.99999953 | 0.8307 | 0 | 0 | 0 | 1      | ME   |
| S7_vf_138019 | Unassigned | Unassigned | Unassigned | 1615_0 | Clustered           | 2 VC_1615_0  | 2  | 0.3719 | 0.85557782 | 0.3182 | 0 | 0 | 0 | 1      | ME   |
| S7_vf_138069 | Unassigned | Unassigned | Unassigned | 1564_0 | Clustered           | 5 VC_1564_0  | 5  | 1      | 1          | 1      | 0 | 0 | 0 | 1      | ME   |
| S7_vf_19866  | Unassigned | Unassigned | Unassigned | 1258_0 | Clustered           | 24 VC_1258_0 | 24 | 0.4451 | 1          | 0.4451 | 0 | 0 | 0 | 1      | ME   |
| S7_vf_20129  | Unassigned | Unassigned | Unassigned | 1549_0 | Clustered           | 5 VC_1549_0  | 5  | 0.6422 | 0.99998224 | 0.6421 | 0 | 0 | 0 | 1      | ME   |
| S7_vf_27437  | Unassigned | Unassigned | Unassigned | 1607_0 | Clustered           | 11 VC_1607_0 | 11 | 0.7884 | 0.99037182 | 0.7808 | 0 | 0 | 0 | 1      | ME   |
| S7_vf_28429  | Unassigned | Unassigned | Unassigned | 1055_0 | Clustered           | 2 VC_1055_0  | 2  | 0.0942 | 0.8510834  | 0.0802 | 0 | 0 | 0 | 1      | ME   |
| S7_vf_29196  | Unassigned | Unassigned | Unassigned | 1554_0 | Clustered           | 5 VC_1554_0  | 5  | 0.1182 | 0.99926768 | 0.1181 | 0 | 0 | 0 | 0.7    | ME   |
| S7_vf_32559  | Unassigned | Unassigned | Unassigned | 1258_0 | Clustered           | 24 VC_1258_0 | 24 | 0.4451 | 1          | 0.4451 | 0 | 0 | 0 | 1      | ME   |
| S7_vf_36627  | Unassigned | Unassigned | Unassigned | 1258_0 | Clustered           | 24 VC_1258_0 | 24 | 0.4451 | 1          | 0.4451 | 0 | 0 | 0 | 1      | ME   |
| S7_vf_37279  | Unassigned | Unassigned | Unassigned | 1525_1 | Clustered/Singleton | 1 VC_1525_1  | 1  | 0      | 1          | 0      | 0 | 0 | 0 | 1      | ME   |
| S7_vf_38697  | Unassigned | Unassigned | Unassigned | 1085_1 | Clustered           | 19 VC_1085_1 | 19 | 0.5328 | 1          | 0.5328 | 0 | 0 | 0 | 0.8947 | ME   |
| S7_vf_39724  | Unassigned | Unassigned | Unassigned | 1288_0 | Clustered           | 7 VC_1288_0  | 7  | 0.9846 | 0.99997693 | 0.9846 | 0 | 0 | 0 | 1      | ME   |
| S7_vf_5439   | Unassigned | Unassigned | Unassigned | 723_0  | Clustered           | 20 VC_723_0  | 20 | 0.7344 | 1          | 0.7344 | 0 | 0 | 0 | 0.7    | ME   |
| S7_vf_5843   | Unassigned | Unassigned | Unassigned | 1195_0 | Clustered           | 2 VC_1195_0  | 2  | 0.2264 | 0.96268605 | 0.218  | 0 | 0 | 0 | 1      | ME   |
| S7_vf_60968  | Unassigned | Unassigned | Unassigned | 278_0  | Clustered           | 11 VC_278_0  | 11 | 0.4188 | 1          | 0.4188 | 0 | 0 | 0 | 0.8    | ME   |
| S7_vf_63894  | Unassigned | Unassigned | Unassigned | 889_0  | Clustered           | 13 VC_889_0  | 13 | 0.6844 | 1          | 0.6844 | 0 | 0 | 0 | 1      | ME   |
| S7_vf_68546  | Unassigned | Unassigned | Unassigned | 921_0  | Clustered           | 4 VC_921_0   | 4  | 0.6171 | 0.99994641 | 0.6171 | 0 | 0 | 0 | 1      | ME   |
| S7_vf_69348  | Unassigned | Unassigned | Unassigned | 1258_0 | Clustered           | 24 VC_1258_0 | 24 | 0.4451 | 1          | 0.4451 | 0 | 0 | 0 | 1      | ME   |
| S7_vf_71527  | Unassigned | Unassigned | Unassigned | 1616_0 | Clustered           | 2 VC_1616_0  | 2  | 1      | 1          | 1      | 0 | 0 | 0 | 1      | ME   |
| S7_vf_76382  | Unassigned | Unassigned | Unassigned | 1261_0 | Clustered           | 14 VC_1261_0 | 14 | 0.3712 | 1          | 0.3712 | 0 | 0 | 0 | 1      | ME   |
| S7_vf_76463  | Unassigned | Unassigned | Unassigned | 1552_0 | Clustered           | 9 VC_1552_0  | 9  | 0.5828 | 1          | 0.5828 | 0 | 0 | 0 | 0.8056 | ME   |
| S7_vf_84974  | Unassigned | Unassigned | Unassigned | 748_0  | Clustered           | 2 VC_748_0   | 2  | 0.2875 | 0.94750719 | 0.2724 | 0 | 0 | 0 | 1      | ME   |
| S7_vf_89197  | Unassigned | Unassigned | Unassigned | 706_0  | Clustered           | 52 VC_706_0  | 52 | 0.9787 | 1          | 0.9787 | 0 | 0 | 0 | 1      | ME   |
| S7_vs_100640 | Unassigned | Unassigned | Unassigned | 1587_0 | Clustered           | 5 VC_1587_0  | 5  | 0.602  | 0.99999964 | 0.602  | 0 | 0 | 0 | 1      | ME   |
| S7_vs_103530 | Unassigned | Unassigned | Unassigned | 1554_2 | Clustered/Singleton | 1 VC_1554_2  | 1  | 0      | 1          | 0      | 0 | 0 | 0 | 1      | ME   |
| S7_vs_11081  | Unassigned | Unassigned | Unassigned | 695_0  | Clustered           | 17 VC_695_0  | 17 | 0.7188 | 1          | 0.7188 | 0 | 0 | 0 | 0.9044 | ME   |
| S7_vs_111831 | Unassigned | Unassigned | Unassigned | 558_0  | Clustered           | 2 VC_558_0   | 2  | 0.0266 | 0.94732133 | 0.0252 | 0 | 0 | 0 | 1      | ME   |
| S7_vs_118295 | Unassigned | Unassigned | Unassigned | 1481_0 | Clustered           | 3 VC_1481_0  | 3  | 0.107  | 0.99563585 | 0.1065 | 0 | 0 | 0 | 0.6667 | ME   |
| S7_vs_119492 | Unassigned | Unassigned | Unassigned | 1261_0 | Clustered           | 14 VC_1261_0 | 14 | 0.3712 | 1          | 0.3712 | 0 | 0 | 0 | 1      | ME   |
| S7_vs_119679 | Unassigned | Unassigned | Unassigned | 696_0  | Clustered           | 3 VC_696_0   | 3  | 0.3671 | 0.99816718 | 0.3664 | 0 | 0 | 0 | 1      | ME   |
| S7_vs_122151 | Unassigned | Unassigned | Unassigned | 779_0  | Clustered           | 19 VC_779_0  | 19 | 0.5105 | 1          | 0.5105 | 0 | 0 | 0 | 0.924  | ME   |
| S7_vs_129271 | Unassigned | Unassigned | Unassigned | 1578_0 | Clustered           | 2 VC_1578_0  | 2  | 0.2609 | 0.94251254 | 0.2459 | 0 | 0 | 0 | 1      | ME   |
| S7_vs_129858 | Unassigned | Unassigned | Unassigned | 1620_0 | Clustered           | 2 VC_1620_0  | 2  | 1      | 1          | 1      | 0 | 0 | 0 | 1      | ME   |
| S7_vs_13041  | Unassigned | Unassigned | Unassigned | 720_0  | Clustered           | 6 VC_720_0   | 6  | 0.5406 | 0.99999978 | 0.5406 | 0 | 0 | 0 | 1      | ME   |
| S7_vs_134391 | Unassigned | Unassigned | Unassigned | 1568_0 | Clustered           | 2 VC_1568_0  | 2  | 0.3084 | 0.94887968 | 0.2927 | 0 | 0 | 0 | 1      | ME   |
| S7_vs_134583 | Unassigned | Unassigned | Unassigned | 728_0  | Clustered           | 7 VC_728_0   | 7  | 0.2344 | 1          | 0.2344 | 0 | 0 | 0 | 0.8095 | ME   |
| S7_vs_135679 | Unassigned | Unassigned | Unassigned | 1594_0 | Clustered/Singleton | 1 VC_1594_0  | 1  | 0      | 1          | 0      | 0 | 0 | 0 | 1      | ME   |
| S7_vs_135828 | Unassigned | Unassigned | Unassigned | 1335_0 | Clustered           | 13 VC_1335_0 | 13 | 0.7519 | 1          | 0.7519 | 0 | 0 | 0 | 1      | ME   |
| S7_vs_136164 | Unassigned | Unassigned | Unassigned | 1570_0 | Clustered           | 7 VC_1570_0  | 7  | 0.3986 | 0.99999956 | 0.3986 | 0 | 0 | 0 | 1      | ME   |
| S7_vs_137611 | Unassigned | Unassigned | Unassigned | 219_2  | Clustered/Singleton | 1 VC_219_2   | 1  | 0      | 1          | 0      | 0 | 0 | 0 | 1      | ME   |
| S7_vs_137915 | Unassigned | Unassigned | Unassigned | 963_0  | Clustered           | 4 VC_963_0   | 4  | 0.2848 | 0.99994144 | 0.2848 | 0 | 0 | 0 | 0.8333 | ME   |
| S7_vs_13799  | Unassigned | Unassigned | Unassigned | 278_0  | Clustered           | 11 VC_278_0  | 11 | 0.4188 | 1          | 0.4188 | 0 | 0 | 0 | 0.8    | ME   |
| S7_vs_138096 | Unassigned | Unassigned | Unassigned | 1570_0 | Clustered           | 7 VC_1570_0  | 7  | 0.3986 | 0.99999956 | 0.3986 | 0 | 0 | 0 | 1      | ME   |
| S7_vs_138109 | Unassigned | Unassigned | Unassigned | 278_0  | Clustered           | 11 VC_278_0  | 11 | 0.4188 | 1          | 0.4188 | 0 | 0 | 0 | 0.8    | ME   |
| S7_vs_138173 | Unassigned | Unassigned | Unassigned | 950_0  | Clustered           | 5 VC_950_0   | 5  | 0.5772 | 0.99999979 | 0.5772 | 0 | 0 | 0 | 1      | ME   |
| S7_vs_20200  | Unassigned | Unassigned | Unassigned | 1291_0 | Clustered           | 18 VC_1291_0 | 18 | 0.5095 | 1          | 0.5095 | 0 | 0 | 0 | 0.9542 | ME   |
| S7_vs_2599   | Unassigned | Unassigned | Unassigned | 1572_0 | Clustered           | 3 VC_1572_0  | 3  | 0.62   | 0.99423001 | 0.6164 | 0 | 0 | 0 | 1      | ME   |
| S7_vs_27530  | Unassigned | Unassigned | Unassigned | 1567_0 | Clustered           | 4 VC_1567_0  | 4  | 0.1809 | 0.99997266 | 0.1808 | 0 | 0 | 0 | 0.8333 | ME   |
| S7_vs_28733  | Unassigned | Unassigned | Unassigned | 923_0  | Clustered           | 7 VC_923_0   | 7  | 0.1207 | 0.99951443 | 0.1206 | 0 | 0 | 0 | 0.9524 | ME   |
| S7_vs_38113  | Unassigned | Unassigned | Unassigned | 779_0  | Clustered           | 19 VC_779_0  | 19 | 0.5105 | 1          | 0.5105 | 0 | 0 | 0 | 0.924  | ME   |
| S7_vs_38834  | Unassigned | Unassigned | Unassigned | 779_0  | Clustered           | 19 VC_779_0  | 19 | 0.5105 | 1          | 0.5105 | 0 | 0 | 0 | 0.924  | ME   |



|              |            |            |            |        |                     |               |     |        |            |        |   |   |   |             |
|--------------|------------|------------|------------|--------|---------------------|---------------|-----|--------|------------|--------|---|---|---|-------------|
| S7_vs_41098  | Unassigned | Unassigned | Unassigned | 1085_1 | Clustered           | 19 VC_1085_1  | 19  | 0.5328 | 1          | 0.5328 | 0 | 0 | 0 | 0.8947 ME   |
| S7_vs_41534  | Unassigned | Unassigned | Unassigned | 1265_0 | Clustered           | 2 VC_1265_0   | 2   | 0.2124 | 0.95447702 | 0.2027 | 0 | 0 | 0 | 1 ME        |
| S7_vs_42563  | Unassigned | Unassigned | Unassigned | 1291_0 | Clustered           | 18 VC_1291_0  | 18  | 0.5095 | 1          | 0.5095 | 0 | 0 | 0 | 0.9542 ME   |
| S7_vs_47050  | Unassigned | Unassigned | Unassigned | 720_0  | Clustered           | 6 VC_720_0    | 6   | 0.5406 | 0.99999978 | 0.5406 | 0 | 0 | 0 | 1 ME        |
| S7_vs_48523  | Unassigned | Unassigned | Unassigned | 152_0  | Clustered           | 10 VC_152_0   | 10  | 0.6545 | 1          | 0.6545 | 0 | 0 | 0 | 0.8889 ME   |
| S7_vs_48708  | Unassigned | Unassigned | Unassigned | 442_0  | Clustered           | 3 VC_442_0    | 3   | 0.4483 | 0.9977727  | 0.4473 | 0 | 0 | 0 | 1 ME        |
| S7_vs_48832  | Unassigned | Unassigned | Unassigned | 278_0  | Clustered           | 11 VC_278_0   | 11  | 0.4188 | 1          | 0.4188 | 0 | 0 | 0 | 0.8 ME      |
| S7_vs_49426  | Unassigned | Unassigned | Unassigned | 1149_0 | Clustered           | 3 VC_1149_0   | 3   | 0.5474 | 0.99645906 | 0.5454 | 0 | 0 | 0 | 1 ME        |
| S7_vs_4956   | Unassigned | Unassigned | Unassigned | 723_0  | Clustered           | 20 VC_723_0   | 20  | 0.7344 | 1          | 0.7344 | 0 | 0 | 0 | 0.7 ME      |
| S7_vs_50194  | Unassigned | Unassigned | Unassigned | 1602_0 | Clustered           | 4 VC_1602_0   | 4   | 0.797  | 0.99955772 | 0.7966 | 0 | 0 | 0 | 1 ME        |
| S7_vs_5236   | Unassigned | Unassigned | Unassigned | 1289_0 | Clustered           | 9 VC_1289_0   | 9   | 0.4889 | 1          | 0.4889 | 0 | 0 | 0 | 0.7222 ME   |
| S7_vs_54322  | Unassigned | Unassigned | Unassigned | 1565_1 | Clustered/Singleton | 1 VC_1565_1   | 1   | 0      | 1          | 0      | 0 | 0 | 0 | 1 ME        |
| S7_vs_55409  | Unassigned | Unassigned | Unassigned | 778_0  | Clustered           | 13 VC_778_0   | 13  | 0.2581 | 1          | 0.2581 | 0 | 0 | 0 | 0.9359 ME   |
| S7_vs_557    | Unassigned | Unassigned | Unassigned | 1505_0 | Clustered           | 7 VC_1505_0   | 7   | 0.4784 | 0.99999946 | 0.4784 | 0 | 0 | 0 | 0.9048 ME   |
| S7_vs_56529  | Unassigned | Unassigned | Unassigned | 667_0  | Clustered           | 12 VC_667_0   | 12  | 0.2907 | 0.99999999 | 0.2907 | 0 | 0 | 0 | 1 ME        |
| S7_vs_59465  | Unassigned | Unassigned | Unassigned | 151_0  | Clustered           | 17 VC_151_0   | 17  | 0.4863 | 1          | 0.4863 | 0 | 0 | 0 | 0.9779 ME   |
| S7_vs_6626   | Unassigned | Unassigned | Unassigned | 723_0  | Clustered           | 20 VC_723_0   | 20  | 0.7344 | 1          | 0.7344 | 0 | 0 | 0 | 0.7 ME      |
| S7_vs_69630  | Unassigned | Unassigned | Unassigned | 660_0  | Clustered           | 2 VC_660_0    | 2   | 0.0368 | 0.95624697 | 0.0352 | 0 | 0 | 0 | 1 ME        |
| S7_vs_73280  | Unassigned | Unassigned | Unassigned | 642_0  | Clustered           | 3 VC_642_0    | 3   | 0.1258 | 0.72377751 | 0.0911 | 0 | 0 | 0 | 1 ME        |
| S7_vs_78507  | Unassigned | Unassigned | Unassigned | 1481_2 | Clustered/Singleton | 1 VC_1481_2   | 1   | 0      | 1          | 0      | 0 | 0 | 0 | 1 ME        |
| S7_vs_82140  | Unassigned | Unassigned | Unassigned | 779_0  | Clustered           | 19 VC_779_0   | 19  | 0.5105 | 1          | 0.5105 | 0 | 0 | 0 | 0.924 ME    |
| S7_vs_83100  | Unassigned | Unassigned | Unassigned | 152_0  | Clustered           | 10 VC_152_0   | 10  | 0.6545 | 1          | 0.6545 | 0 | 0 | 0 | 0.8889 ME   |
| S7_vs_86377  | Unassigned | Unassigned | Unassigned | 332_0  | Clustered           | 3 VC_332_0    | 3   | 0.1832 | 0.99801912 | 0.1828 | 0 | 0 | 0 | 1 ME        |
| S7_vs_87439  | Unassigned | Unassigned | Unassigned | 1479_0 | Clustered           | 4 VC_1479_0   | 4   | 0.3371 | 0.99995008 | 0.3371 | 0 | 0 | 0 | 0.8333 ME   |
| S7_vs_90915  | Unassigned | Unassigned | Unassigned | 152_0  | Clustered           | 10 VC_152_0   | 10  | 0.6545 | 1          | 0.6545 | 0 | 0 | 0 | 0.8889 ME   |
| S7_vs_944    | Unassigned | Unassigned | Unassigned | 1505_0 | Clustered           | 7 VC_1505_0   | 7   | 0.4784 | 0.99999946 | 0.4784 | 0 | 0 | 0 | 0.9048 ME   |
| S8_vf_101283 | Unassigned | Unassigned | Unassigned | 728_0  | Clustered           | 7 VC_728_0    | 7   | 0.2344 | 1          | 0.2344 | 0 | 0 | 0 | 0.8095 SHHC |
| S8_vf_106946 | Unassigned | Unassigned | Unassigned | 86_0   | Clustered           | 2 VC_86_0     | 2   | 0.1888 | 0.95560877 | 0.1804 | 0 | 0 | 0 | 1 SHHC      |
| S8_vf_111790 | Unassigned | Unassigned | Unassigned | 1421_0 | Clustered           | 4 VC_1421_0   | 4   | 0.3219 | 0.99997685 | 0.3219 | 0 | 0 | 0 | 0.8333 SHHC |
| S8_vf_117796 | Unassigned | Unassigned | Unassigned | 695_0  | Clustered           | 17 VC_695_0   | 17  | 0.7188 | 1          | 0.7188 | 0 | 0 | 0 | 0.9044 SHHC |
| S8_vf_11794  | Unassigned | Unassigned | Unassigned | 491_2  | Clustered/Singleton | 1 VC_491_2    | 1   | 0      | 1          | 0      | 0 | 0 | 0 | 1 SHHC      |
| S8_vf_12212  | Unassigned | Unassigned | Unassigned | 153_0  | Clustered           | 2 VC_153_0    | 2   | 0.6127 | 0.90478487 | 0.5544 | 0 | 0 | 0 | 1 SHHC      |
| S8_vf_129423 | Unassigned | Unassigned | Unassigned | 889_0  | Clustered           | 13 VC_889_0   | 13  | 0.6844 | 1          | 0.6844 | 0 | 0 | 0 | 1 SHHC      |
| S8_vf_131009 | Unassigned | Unassigned | Unassigned | 1254_2 | Clustered           | 2 VC_1254_2   | 2   | 0.0651 | 0.95173063 | 0.062  | 0 | 0 | 0 | 1 SHHC      |
| S8_vf_131802 | Unassigned | Unassigned | Unassigned | 519_5  | Clustered           | 2 VC_519_5    | 2   | 0.0476 | 0.95398212 | 0.0454 | 0 | 0 | 0 | 1 SHHC      |
| S8_vf_132697 | Unassigned | Unassigned | Unassigned | 1254_0 | Clustered           | 2 VC_1254_0   | 2   | 0.1537 | 0.95108637 | 0.1461 | 0 | 0 | 0 | 1 SHHC      |
| S8_vf_134943 | Unassigned | Unassigned | Unassigned | 1564_0 | Clustered           | 5 VC_1564_0   | 5   | 1      | 1          | 1      | 0 | 0 | 0 | 1 SHHC      |
| S8_vf_136235 | Unassigned | Unassigned | Unassigned | 1549_0 | Clustered           | 5 VC_1549_0   | 5   | 0.6422 | 0.99998224 | 0.6421 | 0 | 0 | 0 | 1 SHHC      |
| S8_vf_13758  | Unassigned | Unassigned | Unassigned | 1477_0 | Clustered           | 2 VC_1477_0   | 2   | 0.1794 | 0.94916107 | 0.1703 | 0 | 0 | 0 | 1 SHHC      |
| S8_vf_142700 | Unassigned | Unassigned | Unassigned | 1549_0 | Clustered           | 5 VC_1549_0   | 5   | 0.6422 | 0.99998224 | 0.6421 | 0 | 0 | 0 | 1 SHHC      |
| S8_vf_147128 | Unassigned | Unassigned | Unassigned | 1490_1 | Clustered           | 6 VC_1490_1   | 6   | 0.3734 | 1          | 0.3734 | 0 | 0 | 0 | 1 SHHC      |
| S8_vf_151384 | Unassigned | Unassigned | Unassigned | 723_0  | Clustered           | 20 VC_723_0   | 20  | 0.7344 | 1          | 0.7344 | 0 | 0 | 0 | 0.7 SHHC    |
| S8_vf_158225 | Unassigned | Unassigned | Unassigned | 691_0  | Clustered           | 18 VC_691_0   | 18  | 0.6865 | 1          | 0.6865 | 0 | 0 | 0 | 0.9477 SHHC |
| S8_vf_161703 | Unassigned | Unassigned | Unassigned | 1040_1 | Clustered/Singleton | 1 VC_1040_1   | 1   | 0      | 1          | 0      | 0 | 0 | 0 | 1 SHHC      |
| S8_vf_16172  | Unassigned | Unassigned | Unassigned | 1583_0 | Clustered           | 3 VC_1583_0   | 3   | 0.6428 | 0.99188498 | 0.6375 | 0 | 0 | 0 | 1 SHHC      |
| S8_vf_163760 | Unassigned | Unassigned | Unassigned | 1085_1 | Clustered           | 19 VC_1085_1  | 19  | 0.5328 | 1          | 0.5328 | 0 | 0 | 0 | 0.8947 SHHC |
| S8_vf_166403 | Unassigned | Unassigned | Unassigned | 1294_0 | Clustered           | 2 VC_1294_0   | 2   | 0.0827 | 0.95399215 | 0.0789 | 0 | 0 | 0 | 1 SHHC      |
| S8_vf_166677 | Unassigned | Unassigned | Unassigned | 691_1  | Clustered           | 5 VC_691_1    | 5   | 0.1605 | 0.99999993 | 0.1605 | 0 | 0 | 0 | 0.8 SHHC    |
| S8_vf_170430 | Unassigned | Unassigned | Unassigned | 880_0  | Clustered           | 4 VC_880_0    | 4   | 0.0727 | 0.88800114 | 0.0645 | 0 | 0 | 0 | 1 SHHC      |
| S8_vf_170878 | Unassigned | Unassigned | Unassigned | 728_0  | Clustered           | 7 VC_728_0    | 7   | 0.2344 | 1          | 0.2344 | 0 | 0 | 0 | 0.8095 SHHC |
| S8_vf_173225 | Unassigned | Unassigned | Unassigned | 490_1  | Clustered/Singleton | 1 VC_490_1    | 1   | 0      | 1          | 0      | 0 | 0 | 0 | 1 SHHC      |
| S8_vf_174559 | Unassigned | Unassigned | Unassigned | 1261_0 | Clustered           | 14 VC_1261_0  | 14  | 0.3712 | 1          | 0.3712 | 0 | 0 | 0 | 1 SHHC      |
| S8_vf_183045 | Unassigned | Unassigned | Unassigned | 1044_0 | Clustered           | 5 VC_1044_0   | 5   | 0.757  | 0.99999838 | 0.757  | 0 | 0 | 0 | 1 SHHC      |
| S8_vf_187742 | Unassigned | Unassigned | Unassigned | 748_0  | Clustered           | 2 VC_748_0    | 2   | 0.2875 | 0.94750719 | 0.2724 | 0 | 0 | 0 | 1 SHHC      |
| S8_vf_196670 | Unassigned | Unassigned | Unassigned | 1258_0 | Clustered           | 24 VC_1258_0  | 24  | 0.4451 | 1          | 0.4451 | 0 | 0 | 0 | 1 SHHC      |
| S8_vf_197061 | Unassigned | Unassigned | Unassigned | 879_0  | Clustered           | 5 VC_879_0    | 5   | 0.3611 | 0.99976884 | 0.3611 | 0 | 0 | 0 | 1 SHHC      |
| S8_vf_203044 | Unassigned | Unassigned | Unassigned | 847_0  | Clustered           | 2 VC_847_0    | 2   | 0.1002 | 0.95451647 | 0.0956 | 0 | 0 | 0 | 1 SHHC      |
| S8_vf_208102 | Unassigned | Unassigned | Unassigned | 1619_0 | Clustered           | 2 VC_1619_0   | 2   | 0.7811 | 0.76024994 | 0.5939 | 0 | 0 | 0 | 1 SHHC      |
| S8_vf_208107 | Unassigned | Unassigned | Unassigned | 1619_0 | Clustered           | 2 VC_1619_0   | 2   | 0.7811 | 0.76024994 | 0.5939 | 0 | 0 | 0 | 1 SHHC      |
| S8_vf_208110 | Unassigned | Unassigned | Unassigned | 491_0  | Clustered           | 2 VC_491_0    | 2   | 0.1386 | 0.94453592 | 0.1309 | 0 | 0 | 0 | 1 SHHC      |
| S8_vf_208119 | Unassigned | Unassigned | Unassigned | 1170_0 | Clustered           | 19 VC_1170_0  | 19  | 0.7497 | 1          | 0.7497 | 0 | 0 | 0 | 1 SHHC      |
| S8_vf_208120 | Unassigned | Unassigned | Unassigned | 951_1  | Clustered           | 2 VC_951_1    | 2   | 0.1168 | 0.95092252 | 0.111  | 0 | 0 | 0 | 1 SHHC      |
| S8_vf_208126 | Unassigned | Unassigned | Unassigned | 151_0  | Clustered           | 17 VC_151_0   | 17  | 0.4863 | 1          | 0.4863 | 0 | 0 | 0 | 0.9779 SHHC |
| S8_vf_208146 | Unassigned | Unassigned | Unassigned | 1184_0 | Clustered           | 10 VC_1184_0  | 10  | 0.7506 | 1          | 0.7506 | 0 | 0 | 0 | 1 SHHC      |
| S8_vf_23955  | Unassigned | Unassigned | Unassigned | 1085_2 | Clustered/Singleton | 1 VC_1085_2   | 1   | 0      | 1          | 0      | 0 | 0 | 0 | 1 SHHC      |
| S8_vf_41376  | Unassigned | Unassigned | Unassigned | 1085_1 | Clustered           | 19 VC_1085_1  | 19  | 0.5328 | 1          | 0.5328 | 0 | 0 | 0 | 0.8947 SHHC |
| S8_vf_43483  | Unassigned | Unassigned | Unassigned | 1607_0 | Clustered           | 11 VC_1607_0  | 11  | 0.7884 | 0.99037182 | 0.7808 | 0 | 0 | 0 | 1 SHHC      |
| S8_vf_45776  | Unassigned | Unassigned | Unassigned | 210_0  | Clustered           | 105 VC_210_0  | 105 | 0.4076 | 1          | 0.4076 | 0 | 0 | 0 | 0.7766 SHHC |
| S8_vf_52050  | Unassigned | Unassigned | Unassigned | 1258_0 | Clustered           | 24 VC_1258_0  | 24  | 0.4451 | 1          | 0.4451 | 0 | 0 | 0 | 1 SHHC      |
| S8_vf_54514  | Unassigned | Unassigned | Unassigned | 1554_5 | Clustered/Singleton | 1 VC_1554_5   | 1   | 0      | 1          | 0      | 0 | 0 | 0 | 1 SHHC      |
| S8_vf_55476  | Unassigned | Unassigned | Unassigned | 1481_1 | Clustered           | 2 VC_1481_1   | 2   | 0.0914 | 0.95495464 | 0.0873 | 0 | 0 | 0 | 1 SHHC      |
| S8_vf_71214  | Unassigned | Unassigned | Unassigned | 1511_0 | Clustered           | 3 VC_1511_0   | 3   | 0.9946 | 0.92554266 | 0.9205 | 0 | 0 | 0 | 1 SHHC      |
| S8_vf_72773  | Unassigned | Unassigned | Unassigned | 1291_0 | Clustered           | 18 VC_1291_0  | 18  | 0.5095 | 1          | 0.5095 | 0 | 0 | 0 | 0.9542 SHHC |
| S8_vf_79769  | Unassigned | Unassigned | Unassigned | 1561_0 | Clustered           | 2 VC_1561_0   | 2   | 0.6315 | 0.9262493  | 0.585  | 0 | 0 | 0 | 1 SHHC      |
| S8_vf_87755  | Unassigned | Unassigned | Unassigned | 691_0  | Clustered           | 18 VC_691_0   | 18  | 0.6865 | 1          | 0.6865 | 0 | 0 | 0 | 0.9477 SHHC |
| S8_vf_93976  | Unassigned | Unassigned | Unassigned | 1570_0 | Clustered           | 7 VC_1570_0   | 7   | 0.3986 | 0.99999956 | 0.3986 | 0 | 0 | 0 | 1 SHHC      |
| S8_vf_94361  | Unassigned | Unassigned | Unassigned | 1145_0 | Clustered           | 164 VC_1145_0 | 164 | 0.8868 | 1          | 0.8868 | 0 | 0 | 0 | 1 SHHC      |
| S8_vs_115958 | Unassigned | Unassigned | Unassigned | 649_4  | Clustered/Singleton | 1 VC_649_4    | 1   | 0      | 1          | 0      | 0 | 0 | 0 | 1 SHHC      |
| S8_vs_125717 | Unassigned | Unassigned | Unassigned | 1274_0 | Clustered           | 6 VC_1274_0   | 6   | 0.494  | 1          | 0.494  | 0 | 0 | 0 | 1 SHHC      |
| S8_vs_132359 | Unassigned | Unassigned | Unassigned | 1618_0 | Clustered           | 2 VC_1618_0   | 2   | 1      | 1          | 1      | 0 | 0 | 0 | 1 SHHC      |
| S8_vs_134805 | Unassigned | Unassigned | Unassigned | 1288_0 | Clustered           | 7 VC_1288_0   | 7   | 0.9846 | 0.99997693 | 0.9846 | 0 | 0 | 0 | 1 SHHC      |



|              |            |            |            |        |                     |              |    |        |            |        |   |   |   |             |
|--------------|------------|------------|------------|--------|---------------------|--------------|----|--------|------------|--------|---|---|---|-------------|
| S8_vs_136922 | Unassigned | Unassigned | Unassigned | 921_0  | Clustered           | 4 VC_921_0   | 4  | 0.6171 | 0.99994641 | 0.6171 | 0 | 0 | 0 | 1 SHHC      |
| S8_vs_142097 | Unassigned | Unassigned | Unassigned | 1258_0 | Clustered           | 24 VC_1258_0 | 24 | 0.4451 | 1          | 0.4451 | 0 | 0 | 0 | 1 SHHC      |
| S8_vs_143608 | Unassigned | Unassigned | Unassigned | 778_0  | Clustered           | 13 VC_778_0  | 13 | 0.2581 | 1          | 0.2581 | 0 | 0 | 0 | 0.9359 SHHC |
| S8_vs_145173 | Unassigned | Unassigned | Unassigned | 1290_0 | Clustered           | 4 VC_1290_0  | 4  | 0.2185 | 0.99997703 | 0.2185 | 0 | 0 | 0 | 1 SHHC      |
| S8_vs_148389 | Unassigned | Unassigned | Unassigned | 1507_0 | Clustered           | 2 VC_1507_0  | 2  | 0.1723 | 0.85186506 | 0.1468 | 0 | 0 | 0 | 1 SHHC      |
| S8_vs_149700 | Unassigned | Unassigned | Unassigned | 649_3  | Clustered           | 2 VC_649_3   | 2  | 0.0305 | 0.91827713 | 0.028  | 0 | 0 | 0 | 1 SHHC      |
| S8_vs_154231 | Unassigned | Unassigned | Unassigned | 779_0  | Clustered           | 19 VC_779_0  | 19 | 0.5105 | 1          | 0.5105 | 0 | 0 | 0 | 0.924 SHHC  |
| S8_vs_162053 | Unassigned | Unassigned | Unassigned | 1258_0 | Clustered           | 24 VC_1258_0 | 24 | 0.4451 | 1          | 0.4451 | 0 | 0 | 0 | 1 SHHC      |
| S8_vs_175235 | Unassigned | Unassigned | Unassigned | 667_0  | Clustered           | 12 VC_667_0  | 12 | 0.2907 | 0.99999999 | 0.2907 | 0 | 0 | 0 | 1 SHHC      |
| S8_vs_176604 | Unassigned | Unassigned | Unassigned | 1231_0 | Clustered           | 2 VC_1231_0  | 2  | 0.6881 | 0.91813282 | 0.6318 | 0 | 0 | 0 | 1 SHHC      |
| S8_vs_176720 | Unassigned | Unassigned | Unassigned | 667_0  | Clustered           | 12 VC_667_0  | 12 | 0.2907 | 0.99999999 | 0.2907 | 0 | 0 | 0 | 1 SHHC      |
| S8_vs_179208 | Unassigned | Unassigned | Unassigned | 1612_1 | Clustered           | 2 VC_1612_1  | 2  | 0.1681 | 0.92921057 | 0.1562 | 0 | 0 | 0 | 1 SHHC      |
| S8_vs_182288 | Unassigned | Unassigned | Unassigned | 1055_1 | Clustered           | 3 VC_1055_1  | 3  | 0.2077 | 0.97832531 | 0.2032 | 0 | 0 | 0 | 1 SHHC      |
| S8_vs_182331 | Unassigned | Unassigned | Unassigned | 669_0  | Clustered           | 2 VC_669_0   | 2  | 0.1292 | 0.95214234 | 0.123  | 0 | 0 | 0 | 1 SHHC      |
| S8_vs_193843 | Unassigned | Unassigned | Unassigned | 1566_0 | Clustered           | 3 VC_1566_0  | 3  | 0.9617 | 0.81445332 | 0.7833 | 0 | 0 | 0 | 1 SHHC      |
| S8_vs_204260 | Unassigned | Unassigned | Unassigned | 1291_0 | Clustered           | 18 VC_1291_0 | 18 | 0.5095 | 1          | 0.5095 | 0 | 0 | 0 | 0.9542 SHHC |
| S8_vs_205257 | Unassigned | Unassigned | Unassigned | 1291_0 | Clustered           | 18 VC_1291_0 | 18 | 0.5095 | 1          | 0.5095 | 0 | 0 | 0 | 0.9542 SHHC |
| S8_vs_206526 | Unassigned | Unassigned | Unassigned | 727_0  | Clustered           | 8 VC_727_0   | 8  | 0.6106 | 1          | 0.6106 | 0 | 0 | 0 | 0.9286 SHHC |
| S8_vs_208103 | Unassigned | Unassigned | Unassigned | 963_0  | Clustered           | 4 VC_963_0   | 4  | 0.2848 | 0.99994144 | 0.2848 | 0 | 0 | 0 | 0.8333 SHHC |
| S8_vs_208113 | Unassigned | Unassigned | Unassigned | 1291_0 | Clustered           | 18 VC_1291_0 | 18 | 0.5095 | 1          | 0.5095 | 0 | 0 | 0 | 0.9542 SHHC |
| S8_vs_208114 | Unassigned | Unassigned | Unassigned | 439_0  | Clustered           | 3 VC_439_0   | 3  | 0.8601 | 0.98155579 | 0.8442 | 0 | 0 | 0 | 1 SHHC      |
| S8_vs_208118 | Unassigned | Unassigned | Unassigned | 152_0  | Clustered           | 10 VC_152_0  | 10 | 0.6545 | 1          | 0.6545 | 0 | 0 | 0 | 0.8889 SHHC |
| S8_vs_208129 | Unassigned | Unassigned | Unassigned | 967_0  | Clustered           | 5 VC_967_0   | 5  | 0.992  | 0.97937098 | 0.9715 | 0 | 0 | 0 | 1 SHHC      |
| S8_vs_28311  | Unassigned | Unassigned | Unassigned | 1062_0 | Clustered           | 2 VC_1062_0  | 2  | 0.4754 | 0.94858067 | 0.4509 | 0 | 0 | 0 | 1 SHHC      |
| S8_vs_4153   | Unassigned | Unassigned | Unassigned | 1507_0 | Clustered           | 2 VC_1507_0  | 2  | 0.1723 | 0.85186506 | 0.1468 | 0 | 0 | 0 | 1 SHHC      |
| S8_vs_47265  | Unassigned | Unassigned | Unassigned | 723_0  | Clustered           | 20 VC_723_0  | 20 | 0.7344 | 1          | 0.7344 | 0 | 0 | 0 | 0.7 SHHC    |
| S8_vs_4883   | Unassigned | Unassigned | Unassigned | 1554_0 | Clustered           | 5 VC_1554_0  | 5  | 0.1182 | 0.99926768 | 0.1181 | 0 | 0 | 0 | 0.7 SHHC    |
| S8_vs_50431  | Unassigned | Unassigned | Unassigned | 1567_0 | Clustered           | 4 VC_1567_0  | 4  | 0.1809 | 0.99997266 | 0.1808 | 0 | 0 | 0 | 0.8333 SHHC |
| S8_vs_5211   | Unassigned | Unassigned | Unassigned | 1611_0 | Clustered           | 4 VC_1611_0  | 4  | 0.5712 | 0.99972475 | 0.571  | 0 | 0 | 0 | 1 SHHC      |
| S8_vs_59736  | Unassigned | Unassigned | Unassigned | 219_3  | Clustered/Singleton | 1 VC_219_3   | 1  | 0      | 1          | 0      | 0 | 0 | 0 | 1 SHHC      |
| S8_vs_71212  | Unassigned | Unassigned | Unassigned | 1479_0 | Clustered           | 4 VC_1479_0  | 4  | 0.3371 | 0.9995008  | 0.3371 | 0 | 0 | 0 | 0.8333 SHHC |
| S8_vs_76852  | Unassigned | Unassigned | Unassigned | 724_0  | Clustered           | 6 VC_724_0   | 6  | 0.1907 | 1          | 0.1907 | 0 | 0 | 0 | 1 SHHC      |
| S8_vs_9114   | Unassigned | Unassigned | Unassigned | 1576_0 | Clustered           | 5 VC_1576_0  | 5  | 0.7068 | 0.9999939  | 0.7068 | 0 | 0 | 0 | 1 SHHC      |
| S8_vs_99362  | Unassigned | Unassigned | Unassigned | 695_0  | Clustered           | 17 VC_695_0  | 17 | 0.7188 | 1          | 0.7188 | 0 | 0 | 0 | 0.9044 SHHC |
| S8_vs_9987   | Unassigned | Unassigned | Unassigned | 951_0  | Clustered           | 2 VC_951_0   | 2  | 0.2138 | 0.95011428 | 0.2031 | 0 | 0 | 0 | 1 SHHC      |
| S9_vf_13507  | Unassigned | Unassigned | Unassigned | 1582_3 | Clustered/Singleton | 1 VC_1582_3  | 1  | 0      | 1          | 0      | 0 | 0 | 0 | 1 ME        |
| S9_vf_15012  | Unassigned | Unassigned | Unassigned | 344_0  | Clustered           | 30 VC_344_0  | 30 | 0.523  | 1          | 0.523  | 0 | 0 | 0 | 0.9954 ME   |
| S9_vf_23901  | Unassigned | Unassigned | Unassigned | 1299_0 | Clustered           | 53 VC_1299_0 | 53 | 0.8666 | 1          | 0.8666 | 0 | 0 | 0 | 1 ME        |
| S9_vf_26805  | Unassigned | Unassigned | Unassigned | 1334_0 | Clustered           | 7 VC_1334_0  | 7  | 0.6918 | 1          | 0.6918 | 0 | 0 | 0 | 1 ME        |
| S9_vf_34736  | Unassigned | Unassigned | Unassigned | 1261_0 | Clustered           | 14 VC_1261_0 | 14 | 0.3712 | 1          | 0.3712 | 0 | 0 | 0 | 1 ME        |
| S9_vf_4115   | Unassigned | Unassigned | Unassigned | 425_0  | Clustered           | 40 VC_425_0  | 40 | 0.8399 | 1          | 0.8399 | 0 | 0 | 0 | 0.9974 ME   |
| S9_vf_51656  | Unassigned | Unassigned | Unassigned | 691_1  | Clustered           | 5 VC_691_1   | 5  | 0.1605 | 0.99999993 | 0.1605 | 0 | 0 | 0 | 0.8 ME      |
| S9_vf_57277  | Unassigned | Unassigned | Unassigned | 1554_4 | Clustered/Singleton | 1 VC_1554_4  | 1  | 0      | 1          | 0      | 0 | 0 | 0 | 1 ME        |
| S9_vf_64844  | Unassigned | Unassigned | Unassigned | 727_0  | Clustered           | 8 VC_727_0   | 8  | 0.6106 | 1          | 0.6106 | 0 | 0 | 0 | 0.9286 ME   |
| S9_vf_70236  | Unassigned | Unassigned | Unassigned | 1258_0 | Clustered           | 24 VC_1258_0 | 24 | 0.4451 | 1          | 0.4451 | 0 | 0 | 0 | 1 ME        |
| S9_vf_73311  | Unassigned | Unassigned | Unassigned | 145_0  | Clustered           | 6 VC_145_0   | 6  | 0.2581 | 0.86251824 | 0.2226 | 0 | 0 | 0 | 0.8667 ME   |
| S9_vf_75363  | Unassigned | Unassigned | Unassigned | 1258_0 | Clustered           | 24 VC_1258_0 | 24 | 0.4451 | 1          | 0.4451 | 0 | 0 | 0 | 1 ME        |
| S9_vf_76769  | Unassigned | Unassigned | Unassigned | 519_6  | Clustered           | 2 VC_519_6   | 2  | 0.031  | 0.93818925 | 0.0291 | 0 | 0 | 0 | 1 ME        |
| S9_vf_79919  | Unassigned | Unassigned | Unassigned | 779_0  | Clustered           | 19 VC_779_0  | 19 | 0.5105 | 1          | 0.5105 | 0 | 0 | 0 | 0.924 ME    |
| S9_vf_90847  | Unassigned | Unassigned | Unassigned | 221_1  | Clustered/Singleton | 1 VC_221_1   | 1  | 0      | 1          | 0      | 0 | 0 | 0 | 1 ME        |
| S9_vf_90852  | Unassigned | Unassigned | Unassigned | 1492_0 | Clustered           | 8 VC_1492_0  | 8  | 0.8295 | 0.99999998 | 0.8295 | 0 | 0 | 0 | 1 ME        |
| S9_vf_90866  | Unassigned | Unassigned | Unassigned | 1229_0 | Clustered           | 5 VC_1229_0  | 5  | 0.9893 | 0.91813282 | 0.9083 | 0 | 0 | 0 | 1 ME        |
| S9_vf_90871  | Unassigned | Unassigned | Unassigned | 150_0  | Clustered           | 3 VC_150_0   | 3  | 0.2193 | 0.99845588 | 0.2189 | 0 | 0 | 0 | 1 ME        |
| S9_vs_10424  | Unassigned | Unassigned | Unassigned | 1421_1 | Clustered/Singleton | 1 VC_1421_1  | 1  | 0      | 1          | 0      | 0 | 0 | 0 | 1 ME        |
| S9_vs_1966   | Unassigned | Unassigned | Unassigned | 332_0  | Clustered           | 3 VC_332_0   | 3  | 0.1832 | 0.99801912 | 0.1828 | 0 | 0 | 0 | 1 ME        |
| S9_vs_21850  | Unassigned | Unassigned | Unassigned | 695_0  | Clustered           | 17 VC_695_0  | 17 | 0.7188 | 1          | 0.7188 | 0 | 0 | 0 | 0.9044 ME   |
| S9_vs_26179  | Unassigned | Unassigned | Unassigned | 782_0  | Clustered           | 5 VC_782_0   | 5  | 0.6682 | 0.99998829 | 0.6682 | 0 | 0 | 0 | 1 ME        |
| S9_vs_27813  | Unassigned | Unassigned | Unassigned | 723_0  | Clustered           | 20 VC_723_0  | 20 | 0.7344 | 1          | 0.7344 | 0 | 0 | 0 | 0.7 ME      |
| S9_vs_28197  | Unassigned | Unassigned | Unassigned | 1505_0 | Clustered           | 7 VC_1505_0  | 7  | 0.4784 | 0.99999946 | 0.4784 | 0 | 0 | 0 | 0.9048 ME   |
| S9_vs_32588  | Unassigned | Unassigned | Unassigned | 1085_1 | Clustered           | 19 VC_1085_1 | 19 | 0.5328 | 1          | 0.5328 | 0 | 0 | 0 | 0.8947 ME   |
| S9_vs_34898  | Unassigned | Unassigned | Unassigned | 278_0  | Clustered           | 11 VC_278_0  | 11 | 0.4188 | 1          | 0.4188 | 0 | 0 | 0 | 0.8 ME      |
| S9_vs_4343   | Unassigned | Unassigned | Unassigned | 1291_0 | Clustered           | 18 VC_1291_0 | 18 | 0.5095 | 1          | 0.5095 | 0 | 0 | 0 | 0.9542 ME   |
| S9_vs_4558   | Unassigned | Unassigned | Unassigned | 1085_1 | Clustered           | 19 VC_1085_1 | 19 | 0.5328 | 1          | 0.5328 | 0 | 0 | 0 | 0.8947 ME   |
| S9_vs_45812  | Unassigned | Unassigned | Unassigned | 667_0  | Clustered           | 12 VC_667_0  | 12 | 0.2907 | 0.99999999 | 0.2907 | 0 | 0 | 0 | 1 ME        |
| S9_vs_46498  | Unassigned | Unassigned | Unassigned | 779_0  | Clustered           | 19 VC_779_0  | 19 | 0.5105 | 1          | 0.5105 | 0 | 0 | 0 | 0.924 ME    |
| S9_vs_48424  | Unassigned | Unassigned | Unassigned | 1565_0 | Clustered           | 2 VC_1565_0  | 2  | 0.2323 | 0.95156715 | 0.221  | 0 | 0 | 0 | 1 ME        |
| S9_vs_50439  | Unassigned | Unassigned | Unassigned | 1554_3 | Clustered/Singleton | 1 VC_1554_3  | 1  | 0      | 1          | 0      | 0 | 0 | 0 | 1 ME        |
| S9_vs_56354  | Unassigned | Unassigned | Unassigned | 723_0  | Clustered           | 20 VC_723_0  | 20 | 0.7344 | 1          | 0.7344 | 0 | 0 | 0 | 0.7 ME      |
| S9_vs_5676   | Unassigned | Unassigned | Unassigned | 724_0  | Clustered           | 6 VC_724_0   | 6  | 0.1907 | 1          | 0.1907 | 0 | 0 | 0 | 1 ME        |
| S9_vs_58402  | Unassigned | Unassigned | Unassigned | 1613_0 | Clustered           | 3 VC_1613_0  | 3  | 0.4581 | 0.98351531 | 0.4505 | 0 | 0 | 0 | 1 ME        |
| S9_vs_63485  | Unassigned | Unassigned | Unassigned | 1604_0 | Clustered           | 2 VC_1604_0  | 2  | 0.3203 | 0.92921057 | 0.2977 | 0 | 0 | 0 | 1 ME        |
| S9_vs_73764  | Unassigned | Unassigned | Unassigned | 778_0  | Clustered           | 13 VC_778_0  | 13 | 0.2581 | 1          | 0.2581 | 0 | 0 | 0 | 0.9359 ME   |
| S9_vs_75050  | Unassigned | Unassigned | Unassigned | 778_0  | Clustered           | 13 VC_778_0  | 13 | 0.2581 | 1          | 0.2581 | 0 | 0 | 0 | 0.9359 ME   |
| S9_vs_75290  | Unassigned | Unassigned | Unassigned | 1607_0 | Clustered           | 11 VC_1607_0 | 11 | 0.7884 | 0.99037182 | 0.7808 | 0 | 0 | 0 | 1 ME        |
| S9_vs_7881   | Unassigned | Unassigned | Unassigned | 151_0  | Clustered           | 17 VC_151_0  | 17 | 0.4863 | 1          | 0.4863 | 0 | 0 | 0 | 0.9779 ME   |
| S9_vs_83108  | Unassigned | Unassigned | Unassigned | 1560_0 | Clustered           | 2 VC_1560_0  | 2  | 0.9209 | 0.85557782 | 0.7879 | 0 | 0 | 0 | 1 ME        |
| S9_vs_84046  | Unassigned | Unassigned | Unassigned | 724_0  | Clustered           | 6 VC_724_0   | 6  | 0.1907 | 1          | 0.1907 | 0 | 0 | 0 | 1 ME        |
| S9_vs_90727  | Unassigned | Unassigned | Unassigned | 649_5  | Clustered/Singleton | 1 VC_649_5   | 1  | 0      | 1          | 0      | 0 | 0 | 0 | 1 ME        |
| S9_vs_90846  | Unassigned | Unassigned | Unassigned | 640_0  | Clustered/Singleton | 1 VC_640_0   | 1  | 0      | 1          | 0      | 0 | 0 | 0 | 1 ME        |
| S9_vs_90849  | Unassigned | Unassigned | Unassigned | 1291_0 | Clustered           | 18 VC_1291_0 | 18 | 0.5095 | 1          | 0.5095 | 0 | 0 | 0 | 0.9542 ME   |
| S9_vs_90851  | Unassigned | Unassigned | Unassigned | 151_0  | Clustered           | 17 VC_151_0  | 17 | 0.4863 | 1          | 0.4863 | 0 | 0 | 0 | 0.9779 ME   |



[illegible]



|                 |            |            |            |                                |     |
|-----------------|------------|------------|------------|--------------------------------|-----|
| AY616446        | Unassigned | Unassigned | Unassigned | Outlier                        | Ref |
| AY657002        | Unassigned | Unassigned | Unassigned | Overlap (VC_648/VC_649)        | Ref |
| AY736146        | Unassigned | Unassigned | Unassigned | Outlier                        | Ref |
| AY766464        | Unassigned | Unassigned | Unassigned | Outlier                        | Ref |
| AY894696        | Unassigned | Unassigned | Unassigned | Outlier                        | Ref |
| AY954948        | Unassigned | Unassigned | Unassigned | Outlier                        | Ref |
| AY954950        | Unassigned | Unassigned | Unassigned | Outlier                        | Ref |
| AY954958        | Unassigned | Unassigned | Unassigned | Outlier                        | Ref |
| AY954959        | Unassigned | Unassigned | Unassigned | Outlier                        | Ref |
| AY954970        | Unassigned | Unassigned | Unassigned | Outlier                        | Ref |
| AY986977        | Unassigned | Unassigned | Unassigned | Outlier                        | Ref |
| B2U02303        | Unassigned | Unassigned | Unassigned | Outlier                        | Ref |
| B4PORFSX        | Unassigned | Unassigned | Unassigned | Outlier                        | Ref |
| BK059157        | Unassigned | Unassigned | Unassigned | Singleton                      | Ref |
| BK059162        | Unassigned | Unassigned | Unassigned | Singleton                      | Ref |
| BL2CG           | Unassigned | Unassigned | Unassigned | Singleton                      | Ref |
| BL5GENM         | Unassigned | Unassigned | Unassigned | Singleton                      | Ref |
| BX571876        | Unassigned | Unassigned | Unassigned | Outlier                        | Ref |
| CAJDKB010000002 | Unassigned | Unassigned | Unassigned | Overlap (VC_711/VC_712)        | Ref |
| CAKLQB020000002 | Unassigned | Unassigned | Unassigned | Outlier                        | Ref |
| CP000315        | Unassigned | Unassigned | Unassigned | Outlier                        | Ref |
| CP002889        | Unassigned | Unassigned | Unassigned | Outlier                        | Ref |
| CP003186        | Unassigned | Unassigned | Unassigned | Outlier                        | Ref |
| CP011103        | Unassigned | Unassigned | Unassigned | Outlier                        | Ref |
| CP014526        | Unassigned | Unassigned | Unassigned | Outlier                        | Ref |
| CP017837        | Unassigned | Unassigned | Unassigned | Outlier                        | Ref |
| CP017838        | Unassigned | Unassigned | Unassigned | Singleton                      | Ref |
| CP018841        | Unassigned | Unassigned | Unassigned | Outlier                        | Ref |
| CP019719        | Unassigned | Unassigned | Unassigned | Outlier                        | Ref |
| CP025712        | Unassigned | Unassigned | Unassigned | Outlier                        | Ref |
| CP025713        | Unassigned | Unassigned | Unassigned | Outlier                        | Ref |
| CP025887        | Unassigned | Unassigned | Unassigned | Outlier                        | Ref |
| CP025902        | Unassigned | Unassigned | Unassigned | Outlier                        | Ref |
| CP025907        | Unassigned | Unassigned | Unassigned | Outlier                        | Ref |
| CP038625        | Unassigned | Unassigned | Unassigned | Outlier                        | Ref |
| CP050061        | Unassigned | Unassigned | Unassigned | Overlap (VC_263/VC_268)        | Ref |
| CP051275        | Unassigned | Unassigned | Unassigned | Outlier                        | Ref |
| CP052843        | Unassigned | Unassigned | Unassigned | Outlier                        | Ref |
| CP058906        | Unassigned | Unassigned | Unassigned | Outlier                        | Ref |
| CP062450        | Unassigned | Unassigned | Unassigned | Outlier                        | Ref |
| CP063417        | Unassigned | Unassigned | Unassigned | Outlier                        | Ref |
| CP063964        | Unassigned | Unassigned | Unassigned | Outlier                        | Ref |
| CP063968        | Unassigned | Unassigned | Unassigned | Outlier                        | Ref |
| CP103976        | Unassigned | Unassigned | Unassigned | Outlier                        | Ref |
| CU468217        | Unassigned | Unassigned | Unassigned | Singleton                      | Ref |
| DQ003640        | Unassigned | Unassigned | Unassigned | Overlap (VC_146/VC_317)        | Ref |
| DQ079869        | Unassigned | Unassigned | Unassigned | Overlap (VC_375/VC_376)        | Ref |
| DQ079877        | Unassigned | Unassigned | Unassigned | Overlap (VC_374/VC_376)        | Ref |
| DQ079898        | Unassigned | Unassigned | Unassigned | Overlap (VC_374/VC_376)        | Ref |
| DQ079905        | Unassigned | Unassigned | Unassigned | Overlap (VC_374/VC_376)        | Ref |
| DQ079907        | Unassigned | Unassigned | Unassigned | Overlap (VC_374/VC_376)        | Ref |
| DQ123818        | Unassigned | Unassigned | Unassigned | Overlap (VC_762/VC_763)        | Ref |
| DQ149023        | Unassigned | Unassigned | Unassigned | Overlap (VC_449/VC_675)        | Ref |
| DQ203855        | Unassigned | Unassigned | Unassigned | Outlier                        | Ref |
| DQ340064        | Unassigned | Unassigned | Unassigned | Overlap (VC_140/VC_346/VC_779) | Ref |
| DQ372923        | Unassigned | Unassigned | Unassigned | Outlier                        | Ref |
| DQ394806        | Unassigned | Unassigned | Unassigned | Overlap (VC_263/VC_268)        | Ref |
| DQ453159        | Unassigned | Unassigned | Unassigned | Outlier                        | Ref |
| DQ499600        | Unassigned | Unassigned | Unassigned | Outlier                        | Ref |
| DQ535032        | Unassigned | Unassigned | Unassigned | Singleton                      | Ref |
| DQ831957        | Unassigned | Unassigned | Unassigned | Overlap (VC_13/VC_29)          | Ref |
| DQ834250        | Unassigned | Unassigned | Unassigned | Overlap (VC_13/VC_29)          | Ref |
| DQ838728        | Unassigned | Unassigned | Unassigned | Overlap (VC_263/VC_268)        | Ref |
| DQ840344        | Unassigned | Unassigned | Unassigned | Overlap (VC_140/VC_346/VC_779) | Ref |
| EF071488        | Unassigned | Unassigned | Unassigned | Singleton                      | Ref |
| EF116926        | Unassigned | Unassigned | Unassigned | Overlap (VC_265/VC_325/VC_330) | Ref |
| EF207558        | Unassigned | Unassigned | Unassigned | Overlap (VC_332/VC_557)        | Ref |
| EF523948        | Unassigned | Unassigned | Unassigned | Outlier                        | Ref |
| EF602154        | Unassigned | Unassigned | Unassigned | Overlap (VC_378/VC_379)        | Ref |
| EU307292        | Unassigned | Unassigned | Unassigned | Outlier                        | Ref |
| EU438902        | Unassigned | Unassigned | Unassigned | Singleton                      | Ref |
| EU719189        | Unassigned | Unassigned | Unassigned | Overlap (VC_141/VC_669)        | Ref |
| EU822883        | Unassigned | Unassigned | Unassigned | Outlier                        | Ref |
| EU849489        | Unassigned | Unassigned | Unassigned | Outlier                        | Ref |
| EU871039        | Unassigned | Unassigned | Unassigned | Outlier                        | Ref |
| EU876853        | Unassigned | Unassigned | Unassigned | Outlier                        | Ref |
| EU982300        | Unassigned | Unassigned | Unassigned | Outlier                        | Ref |
| FI174692        | Unassigned | Unassigned | Unassigned | Overlap (VC_539/VC_568)        | Ref |
| FI792813        | Unassigned | Unassigned | Unassigned | Outlier                        | Ref |
| FI982340        | Unassigned | Unassigned | Unassigned | Outlier                        | Ref |
| FM163528        | Unassigned | Unassigned | Unassigned | Outlier                        | Ref |



|              |            |            |            |                                |     |
|--------------|------------|------------|------------|--------------------------------|-----|
| FN436268     | Unassigned | Unassigned | Unassigned | Singleton                      | Ref |
| FN582354     | Unassigned | Unassigned | Unassigned | Outlier                        | Ref |
| FPLJ01000048 | Unassigned | Unassigned | Unassigned | Singleton                      | Ref |
| FQ482085     | Unassigned | Unassigned | Unassigned | Outlier                        | Ref |
| FR725450     | Unassigned | Unassigned | Unassigned | Singleton                      | Ref |
| GQ334450     | Unassigned | Unassigned | Unassigned | Overlap (VC_450/VC_885)        | Ref |
| GQ357915     | Unassigned | Unassigned | Unassigned | Outlier                        | Ref |
| GQ403788     | Unassigned | Unassigned | Unassigned | Outlier                        | Ref |
| GQ478086     | Unassigned | Unassigned | Unassigned | Overlap (VC_625/VC_797)        | Ref |
| GQ478087     | Unassigned | Unassigned | Unassigned | Overlap (VC_625/VC_797)        | Ref |
| GQ478088     | Unassigned | Unassigned | Unassigned | Overlap (VC_445/VC_757)        | Ref |
| GQ866233     | Unassigned | Unassigned | Unassigned | Overlap (VC_438/VC_439)        | Ref |
| GQ900512     | Unassigned | Unassigned | Unassigned | Outlier                        | Ref |
| GQ919031     | Unassigned | Unassigned | Unassigned | Outlier                        | Ref |
| GU071090     | Unassigned | Unassigned | Unassigned | Overlap (VC_450/VC_885)        | Ref |
| GU071096     | Unassigned | Unassigned | Unassigned | Overlap (VC_675/VC_680)        | Ref |
| GU071101     | Unassigned | Unassigned | Unassigned | Outlier                        | Ref |
| GU071108     | Unassigned | Unassigned | Unassigned | Overlap (VC_675/VC_681/VC_683) | Ref |
| GU075905     | Unassigned | Unassigned | Unassigned | Outlier                        | Ref |
| GU233956     | Unassigned | Unassigned | Unassigned | Outlier                        | Ref |
| GU323318     | Unassigned | Unassigned | Unassigned | Overlap (VC_293/VC_297/VC_509) | Ref |
| GU568037     | Unassigned | Unassigned | Unassigned | Outlier                        | Ref |
| GU580940     | Unassigned | Unassigned | Unassigned | Outlier                        | Ref |
| GU580943     | Unassigned | Unassigned | Unassigned | Outlier                        | Ref |
| GU722197     | Unassigned | Unassigned | Unassigned | Singleton                      | Ref |
| GU815339     | Unassigned | Unassigned | Unassigned | Outlier                        | Ref |
| GU936714     | Unassigned | Unassigned | Unassigned | Outlier                        | Ref |
| GU943031     | Unassigned | Unassigned | Unassigned | Outlier                        | Ref |
| GU943068     | Unassigned | Unassigned | Unassigned | Outlier                        | Ref |
| GU949551     | Unassigned | Unassigned | Unassigned | Outlier                        | Ref |
| HE580238     | Unassigned | Unassigned | Unassigned | Singleton                      | Ref |
| HE611333     | Unassigned | Unassigned | Unassigned | Outlier                        | Ref |
| HE614281     | Unassigned | Unassigned | Unassigned | Overlap (VC_673/VC_764)        | Ref |
| HE614282     | Unassigned | Unassigned | Unassigned | Overlap (VC_673/VC_764)        | Ref |
| HE681887     | Unassigned | Unassigned | Unassigned | Singleton                      | Ref |
| HK798806     | Unassigned | Unassigned | Unassigned | Overlap (VC_183/VC_303)        | Ref |
| HM114277     | Unassigned | Unassigned | Unassigned | Overlap (VC_581/VC_582/VC_583) | Ref |
| HM144385     | Unassigned | Unassigned | Unassigned | Outlier                        | Ref |
| HM144386     | Unassigned | Unassigned | Unassigned | Outlier                        | Ref |
| HM151342     | Unassigned | Unassigned | Unassigned | Overlap (VC_175/VC_486)        | Ref |
| HM152765     | Unassigned | Unassigned | Unassigned | Overlap (VC_917/VC_919)        | Ref |
| HM173637     | Unassigned | Unassigned | Unassigned | Overlap (VC_33/VC_37)          | Ref |
| HM246720     | Unassigned | Unassigned | Unassigned | Outlier                        | Ref |
| HM246722     | Unassigned | Unassigned | Unassigned | Outlier                        | Ref |
| HM246723     | Unassigned | Unassigned | Unassigned | Outlier                        | Ref |
| HM246724     | Unassigned | Unassigned | Unassigned | Outlier                        | Ref |
| HM486077     | Unassigned | Unassigned | Unassigned | Outlier                        | Ref |
| HM596271     | Unassigned | Unassigned | Unassigned | Outlier                        | Ref |
| HQ225832     | Unassigned | Unassigned | Unassigned | Singleton                      | Ref |
| HQ264138     | Unassigned | Unassigned | Unassigned | Singleton                      | Ref |
| HQ268735     | Unassigned | Unassigned | Unassigned | Overlap (VC_147/VC_150)        | Ref |
| HQ316580     | Unassigned | Unassigned | Unassigned | Outlier                        | Ref |
| HQ317383     | Unassigned | Unassigned | Unassigned | Overlap (VC_675/VC_682)        | Ref |
| HQ317385     | Unassigned | Unassigned | Unassigned | Overlap (VC_449/VC_675)        | Ref |
| HQ331142     | Unassigned | Unassigned | Unassigned | Overlap (VC_293/VC_297/VC_509) | Ref |
| HQ332139     | Unassigned | Unassigned | Unassigned | Outlier                        | Ref |
| HQ615693     | Unassigned | Unassigned | Unassigned | Outlier                        | Ref |
| HQ634153     | Unassigned | Unassigned | Unassigned | Outlier                        | Ref |
| HQ634174     | Unassigned | Unassigned | Unassigned | Outlier                        | Ref |
| HQ634178     | Unassigned | Unassigned | Unassigned | Overlap (VC_675/VC_681/VC_683) | Ref |
| HQ634191     | Unassigned | Unassigned | Unassigned | Overlap (VC_449/VC_675)        | Ref |
| HQ634193     | Unassigned | Unassigned | Unassigned | Outlier                        | Ref |
| HQ641380     | Unassigned | Unassigned | Unassigned | Outlier                        | Ref |
| HQ728266     | Unassigned | Unassigned | Unassigned | Outlier                        | Ref |
| JP270478     | Unassigned | Unassigned | Unassigned | Outlier                        | Ref |
| JP314845     | Unassigned | Unassigned | Unassigned | Outlier                        | Ref |
| JP317274     | Unassigned | Unassigned | Unassigned | Outlier                        | Ref |
| JP412294     | Unassigned | Unassigned | Unassigned | Outlier                        | Ref |
| JP412295     | Unassigned | Unassigned | Unassigned | Outlier                        | Ref |
| JP412297     | Unassigned | Unassigned | Unassigned | Outlier                        | Ref |
| JP412298     | Unassigned | Unassigned | Unassigned | Singleton                      | Ref |
| JP412299     | Unassigned | Unassigned | Unassigned | Outlier                        | Ref |
| JP412300     | Unassigned | Unassigned | Unassigned | Singleton                      | Ref |
| JP412301     | Unassigned | Unassigned | Unassigned | Singleton                      | Ref |
| JP412302     | Unassigned | Unassigned | Unassigned | Outlier                        | Ref |
| JP704108     | Unassigned | Unassigned | Unassigned | Overlap (VC_917/VC_919)        | Ref |
| JP704113     | Unassigned | Unassigned | Unassigned | Overlap (VC_917/VC_919)        | Ref |
| JP704115     | Unassigned | Unassigned | Unassigned | Overlap (VC_542/VC_566)        | Ref |
| JP832915     | Unassigned | Unassigned | Unassigned | Overlap (VC_188/VC_191)        | Ref |
| JP912400     | Unassigned | Unassigned | Unassigned | Overlap (VC_603/VC_605)        | Ref |
| JP974288     | Unassigned | Unassigned | Unassigned | Overlap (VC_449/VC_675)        | Ref |



|          |            |            |            |                         |     |
|----------|------------|------------|------------|-------------------------|-----|
| JF974289 | Unassigned | Unassigned | Unassigned | Overlap (VC_449/VC_675) | Ref |
| JF974292 | Unassigned | Unassigned | Unassigned | Overlap (VC_675/VC_680) | Ref |
| JF974293 | Unassigned | Unassigned | Unassigned | Overlap (VC_449/VC_675) | Ref |
| JF974295 | Unassigned | Unassigned | Unassigned | Outlier                 | Ref |
| JF974315 | Unassigned | Unassigned | Unassigned | Outlier                 | Ref |
| JN116825 | Unassigned | Unassigned | Unassigned | Singleton               | Ref |
| JN191664 | Unassigned | Unassigned | Unassigned | Overlap (VC_720/VC_764) | Ref |
| JN192400 | Unassigned | Unassigned | Unassigned | Overlap (VC_13/VC_29)   | Ref |
| JN192401 | Unassigned | Unassigned | Unassigned | Overlap (VC_13/VC_29)   | Ref |
| JN371768 | Unassigned | Unassigned | Unassigned | Overlap (VC_675/VC_683) | Ref |
| JN564907 | Unassigned | Unassigned | Unassigned | Outlier                 | Ref |
| JN600672 | Unassigned | Unassigned | Unassigned | Overlap (VC_917/VC_919) | Ref |
| JN638751 | Unassigned | Unassigned | Unassigned | Outlier                 | Ref |
| JN700519 | Unassigned | Unassigned | Unassigned | Outlier                 | Ref |
| JN700520 | Unassigned | Unassigned | Unassigned | Outlier                 | Ref |
| JN700521 | Unassigned | Unassigned | Unassigned | Overlap (VC_14/VC_15)   | Ref |
| JN831654 | Unassigned | Unassigned | Unassigned | Overlap (VC_234/VC_975) | Ref |
| JN880423 | Unassigned | Unassigned | Unassigned | Singleton               | Ref |
| JN882265 | Unassigned | Unassigned | Unassigned | Outlier                 | Ref |
| JN991020 | Unassigned | Unassigned | Unassigned | Overlap (VC_72/VC_75)   | Ref |
| JQ011316 | Unassigned | Unassigned | Unassigned | Outlier                 | Ref |
| JQ066768 | Unassigned | Unassigned | Unassigned | Outlier                 | Ref |
| JQ086369 | Unassigned | Unassigned | Unassigned | Overlap (VC_33/VC_37)   | Ref |
| JQ086370 | Unassigned | Unassigned | Unassigned | Overlap (VC_33/VC_37)   | Ref |
| JQ086371 | Unassigned | Unassigned | Unassigned | Outlier                 | Ref |
| JQ086372 | Unassigned | Unassigned | Unassigned | Overlap (VC_33/VC_37)   | Ref |
| JQ086373 | Unassigned | Unassigned | Unassigned | Overlap (VC_33/VC_37)   | Ref |
| JQ086374 | Unassigned | Unassigned | Unassigned | Overlap (VC_33/VC_37)   | Ref |
| JQ086377 | Unassigned | Unassigned | Unassigned | Overlap (VC_33/VC_37)   | Ref |
| JQ177065 | Unassigned | Unassigned | Unassigned | Outlier                 | Ref |
| JQ182726 | Unassigned | Unassigned | Unassigned | Overlap (VC_33/VC_37)   | Ref |
| JQ182727 | Unassigned | Unassigned | Unassigned | Overlap (VC_33/VC_37)   | Ref |
| JQ182730 | Unassigned | Unassigned | Unassigned | Outlier                 | Ref |
| JQ182731 | Unassigned | Unassigned | Unassigned | Overlap (VC_33/VC_37)   | Ref |
| JQ182732 | Unassigned | Unassigned | Unassigned | Overlap (VC_33/VC_37)   | Ref |
| JQ246028 | Unassigned | Unassigned | Unassigned | Outlier                 | Ref |
| JQ267518 | Unassigned | Unassigned | Unassigned | Outlier                 | Ref |
| JQ288021 | Unassigned | Unassigned | Unassigned | Outlier                 | Ref |
| JQ340088 | Unassigned | Unassigned | Unassigned | Outlier                 | Ref |
| JQ341413 | Unassigned | Unassigned | Unassigned | Singleton               | Ref |
| JQ362498 | Unassigned | Unassigned | Unassigned | Outlier                 | Ref |
| JQ446452 | Unassigned | Unassigned | Unassigned | Outlier                 | Ref |
| JQ740787 | Unassigned | Unassigned | Unassigned | Overlap (VC_211/VC_212) | Ref |
| JQ740788 | Unassigned | Unassigned | Unassigned | Overlap (VC_211/VC_212) | Ref |
| JQ740789 | Unassigned | Unassigned | Unassigned | Overlap (VC_211/VC_213) | Ref |
| JQ740790 | Unassigned | Unassigned | Unassigned | Overlap (VC_211/VC_213) | Ref |
| JQ740791 | Unassigned | Unassigned | Unassigned | Overlap (VC_211/VC_212) | Ref |
| JQ740792 | Unassigned | Unassigned | Unassigned | Overlap (VC_211/VC_213) | Ref |
| JQ740793 | Unassigned | Unassigned | Unassigned | Overlap (VC_211/VC_212) | Ref |
| JQ740794 | Unassigned | Unassigned | Unassigned | Overlap (VC_211/VC_212) | Ref |
| JQ740795 | Unassigned | Unassigned | Unassigned | Overlap (VC_211/VC_213) | Ref |
| JQ740796 | Unassigned | Unassigned | Unassigned | Overlap (VC_211/VC_213) | Ref |
| JQ740797 | Unassigned | Unassigned | Unassigned | Overlap (VC_211/VC_213) | Ref |
| JQ740798 | Unassigned | Unassigned | Unassigned | Overlap (VC_211/VC_212) | Ref |
| JQ740799 | Unassigned | Unassigned | Unassigned | Overlap (VC_211/VC_212) | Ref |
| JQ740800 | Unassigned | Unassigned | Unassigned | Overlap (VC_211/VC_212) | Ref |
| JQ740801 | Unassigned | Unassigned | Unassigned | Overlap (VC_211/VC_212) | Ref |
| JQ740802 | Unassigned | Unassigned | Unassigned | Overlap (VC_211/VC_212) | Ref |
| JQ740803 | Unassigned | Unassigned | Unassigned | Overlap (VC_211/VC_212) | Ref |
| JQ740804 | Unassigned | Unassigned | Unassigned | Overlap (VC_211/VC_213) | Ref |
| JQ740805 | Unassigned | Unassigned | Unassigned | Overlap (VC_211/VC_213) | Ref |
| JQ740806 | Unassigned | Unassigned | Unassigned | Overlap (VC_211/VC_212) | Ref |
| JQ740807 | Unassigned | Unassigned | Unassigned | Overlap (VC_211/VC_213) | Ref |
| JQ740808 | Unassigned | Unassigned | Unassigned | Overlap (VC_211/VC_213) | Ref |
| JQ740809 | Unassigned | Unassigned | Unassigned | Overlap (VC_211/VC_212) | Ref |
| JQ740810 | Unassigned | Unassigned | Unassigned | Overlap (VC_211/VC_212) | Ref |
| JQ740811 | Unassigned | Unassigned | Unassigned | Overlap (VC_211/VC_212) | Ref |
| JQ740812 | Unassigned | Unassigned | Unassigned | Overlap (VC_211/VC_213) | Ref |
| JQ740813 | Unassigned | Unassigned | Unassigned | Overlap (VC_211/VC_213) | Ref |
| JQ740814 | Unassigned | Unassigned | Unassigned | Overlap (VC_211/VC_212) | Ref |
| JQ768459 | Unassigned | Unassigned | Unassigned | Outlier                 | Ref |
| JQ801337 | Unassigned | Unassigned | Unassigned | Outlier                 | Ref |
| JQ806764 | Unassigned | Unassigned | Unassigned | Outlier                 | Ref |
| JQ809663 | Unassigned | Unassigned | Unassigned | Outlier                 | Ref |
| JQ809702 | Unassigned | Unassigned | Unassigned | Overlap (VC_542/VC_566) | Ref |
| JQ867100 | Unassigned | Unassigned | Unassigned | Outlier                 | Ref |
| JX006077 | Unassigned | Unassigned | Unassigned | Outlier                 | Ref |
| JX015524 | Unassigned | Unassigned | Unassigned | Overlap (VC_234/VC_975) | Ref |
| JX145341 | Unassigned | Unassigned | Unassigned | Overlap (VC_141/VC_669) | Ref |
| JX181814 | Unassigned | Unassigned | Unassigned | Outlier                 | Ref |
| JX181815 | Unassigned | Unassigned | Unassigned | Outlier                 | Ref |



|          |            |            |            |                                   |     |
|----------|------------|------------|------------|-----------------------------------|-----|
| JX181816 | Unassigned | Unassigned | Unassigned | Outlier                           | Ref |
| JX181817 | Unassigned | Unassigned | Unassigned | Outlier                           | Ref |
| JX181823 | Unassigned | Unassigned | Unassigned | Outlier                           | Ref |
| JX181825 | Unassigned | Unassigned | Unassigned | Overlap (VC_293/VC_297/VC_509)    | Ref |
| JX195166 | Unassigned | Unassigned | Unassigned | Outlier                           | Ref |
| JX409894 | Unassigned | Unassigned | Unassigned | Overlap (VC_301/VC_327)           | Ref |
| JX409895 | Unassigned | Unassigned | Unassigned | Overlap (VC_301/VC_327)           | Ref |
| JX411620 | Unassigned | Unassigned | Unassigned | Overlap (VC_539/VC_568)           | Ref |
| JX509734 | Unassigned | Unassigned | Unassigned | Outlier                           | Ref |
| JX560521 | Unassigned | Unassigned | Unassigned | Outlier                           | Ref |
| JX676771 | Unassigned | Unassigned | Unassigned | Outlier                           | Ref |
| JX871397 | Unassigned | Unassigned | Unassigned | Outlier                           | Ref |
| JX944686 | Unassigned | Unassigned | Unassigned | Outlier                           | Ref |
| KC117378 | Unassigned | Unassigned | Unassigned | Outlier                           | Ref |
| KC131024 | Unassigned | Unassigned | Unassigned | Overlap (VC_1031/VC_1033/VC_1035) | Ref |
| KC131130 | Unassigned | Unassigned | Unassigned | Overlap (VC_456/VC_457)           | Ref |
| KC139516 | Unassigned | Unassigned | Unassigned | Outlier                           | Ref |
| KC237729 | Unassigned | Unassigned | Unassigned | Overlap (VC_334/VC_556)           | Ref |
| KC292025 | Unassigned | Unassigned | Unassigned | Singleton                         | Ref |
| KC348598 | Unassigned | Unassigned | Unassigned | Overlap (VC_269/VC_325)           | Ref |
| KC348599 | Unassigned | Unassigned | Unassigned | Overlap (VC_301/VC_396)           | Ref |
| KC348604 | Unassigned | Unassigned | Unassigned | Outlier                           | Ref |
| KC413987 | Unassigned | Unassigned | Unassigned | Outlier                           | Ref |
| KC460990 | Unassigned | Unassigned | Unassigned | Outlier                           | Ref |
| KC462197 | Unassigned | Unassigned | Unassigned | Outlier                           | Ref |
| KC465899 | Unassigned | Unassigned | Unassigned | Outlier                           | Ref |
| KC465900 | Unassigned | Unassigned | Unassigned | Overlap (VC_497/VC_498)           | Ref |
| KC595516 | Unassigned | Unassigned | Unassigned | Outlier                           | Ref |
| KC688701 | Unassigned | Unassigned | Unassigned | Outlier                           | Ref |
| KC787101 | Unassigned | Unassigned | Unassigned | Overlap (VC_243/VC_245)           | Ref |
| KC821611 | Unassigned | Unassigned | Unassigned | Singleton                         | Ref |
| KC821624 | Unassigned | Unassigned | Unassigned | Outlier                           | Ref |
| KC821626 | Unassigned | Unassigned | Unassigned | Singleton                         | Ref |
| KC832325 | Unassigned | Unassigned | Unassigned | Outlier                           | Ref |
| KC847113 | Unassigned | Unassigned | Unassigned | Outlier                           | Ref |
| KF017003 | Unassigned | Unassigned | Unassigned | Overlap (VC_542/VC_566)           | Ref |
| KF017004 | Unassigned | Unassigned | Unassigned | Overlap (VC_539/VC_569)           | Ref |
| KF017005 | Unassigned | Unassigned | Unassigned | Overlap (VC_539/VC_568)           | Ref |
| KF030445 | Unassigned | Unassigned | Unassigned | Outlier                           | Ref |
| KF044309 | Unassigned | Unassigned | Unassigned | Overlap (VC_375/VC_376)           | Ref |
| KF044310 | Unassigned | Unassigned | Unassigned | Overlap (VC_375/VC_376)           | Ref |
| KF114878 | Unassigned | Unassigned | Unassigned | Singleton                         | Ref |
| KF147891 | Unassigned | Unassigned | Unassigned | Outlier                           | Ref |
| KF147927 | Unassigned | Unassigned | Unassigned | Overlap (VC_273/VC_625)           | Ref |
| KF156339 | Unassigned | Unassigned | Unassigned | Overlap (VC_675/VC_683)           | Ref |
| KF156340 | Unassigned | Unassigned | Unassigned | Overlap (VC_675/VC_684)           | Ref |
| KF183314 | Unassigned | Unassigned | Unassigned | Overlap (VC_273/VC_625)           | Ref |
| KF183315 | Unassigned | Unassigned | Unassigned | Overlap (VC_273/VC_625)           | Ref |
| KF188458 | Unassigned | Unassigned | Unassigned | Outlier                           | Ref |
| KF279414 | Unassigned | Unassigned | Unassigned | Overlap (VC_234/VC_975)           | Ref |
| KF296718 | Unassigned | Unassigned | Unassigned | Overlap (VC_720/VC_764)           | Ref |
| KF301602 | Unassigned | Unassigned | Unassigned | Outlier                           | Ref |
| KF356198 | Unassigned | Unassigned | Unassigned | Outlier                           | Ref |
| KF547926 | Unassigned | Unassigned | Unassigned | Singleton                         | Ref |
| KF589919 | Unassigned | Unassigned | Unassigned | Overlap (VC_14/VC_15)             | Ref |
| KF626666 | Unassigned | Unassigned | Unassigned | Overlap (VC_76/VC_117)            | Ref |
| KF669656 | Unassigned | Unassigned | Unassigned | Outlier                           | Ref |
| KF669658 | Unassigned | Unassigned | Unassigned | Outlier                           | Ref |
| KF669661 | Unassigned | Unassigned | Unassigned | Overlap (VC_1042/VC_1043)         | Ref |
| KF669663 | Unassigned | Unassigned | Unassigned | Overlap (VC_1042/VC_1043)         | Ref |
| KF772233 | Unassigned | Unassigned | Unassigned | Outlier                           | Ref |
| KF772234 | Unassigned | Unassigned | Unassigned | Outlier                           | Ref |
| KF811200 | Unassigned | Unassigned | Unassigned | Overlap (VC_767/VC_768)           | Ref |
| KJ000058 | Unassigned | Unassigned | Unassigned | Overlap (VC_293/VC_297/VC_509)    | Ref |
| KJ010489 | Unassigned | Unassigned | Unassigned | Overlap (VC_711/VC_712)           | Ref |
| KJ018209 | Unassigned | Unassigned | Unassigned | Outlier                           | Ref |
| KJ018210 | Unassigned | Unassigned | Unassigned | Outlier                           | Ref |
| KJ018211 | Unassigned | Unassigned | Unassigned | Outlier                           | Ref |
| KJ018212 | Unassigned | Unassigned | Unassigned | Outlier                           | Ref |
| KJ018214 | Unassigned | Unassigned | Unassigned | Outlier                           | Ref |
| KJ019026 | Unassigned | Unassigned | Unassigned | Overlap (VC_675/VC_684)           | Ref |
| KJ019027 | Unassigned | Unassigned | Unassigned | Overlap (VC_675/VC_683)           | Ref |
| KJ019030 | Unassigned | Unassigned | Unassigned | Overlap (VC_675/VC_684)           | Ref |
| KJ019033 | Unassigned | Unassigned | Unassigned | Overlap (VC_675/VC_684)           | Ref |
| KJ019038 | Unassigned | Unassigned | Unassigned | Overlap (VC_675/VC_684)           | Ref |
| KJ019039 | Unassigned | Unassigned | Unassigned | Overlap (VC_675/VC_684)           | Ref |
| KJ019040 | Unassigned | Unassigned | Unassigned | Overlap (VC_675/VC_683)           | Ref |
| KJ019041 | Unassigned | Unassigned | Unassigned | Overlap (VC_675/VC_683)           | Ref |
| KJ019042 | Unassigned | Unassigned | Unassigned | Overlap (VC_675/VC_683)           | Ref |
| KJ019043 | Unassigned | Unassigned | Unassigned | Overlap (VC_675/VC_683)           | Ref |
| KJ019044 | Unassigned | Unassigned | Unassigned | Overlap (VC_675/VC_683)           | Ref |



|          |            |            |            |                                |     |
|----------|------------|------------|------------|--------------------------------|-----|
| KJ019049 | Unassigned | Unassigned | Unassigned | Overlap (VC_675/VC_683)        | Ref |
| KJ019051 | Unassigned | Unassigned | Unassigned | Overlap (VC_675/VC_683)        | Ref |
| KJ019055 | Unassigned | Unassigned | Unassigned | Overlap (VC_675/VC_684)        | Ref |
| KJ019060 | Unassigned | Unassigned | Unassigned | Overlap (VC_675/VC_683)        | Ref |
| KJ019061 | Unassigned | Unassigned | Unassigned | Overlap (VC_675/VC_683)        | Ref |
| KJ019063 | Unassigned | Unassigned | Unassigned | Overlap (VC_675/VC_683)        | Ref |
| KJ019064 | Unassigned | Unassigned | Unassigned | Overlap (VC_675/VC_683)        | Ref |
| KJ019065 | Unassigned | Unassigned | Unassigned | Overlap (VC_675/VC_684)        | Ref |
| KJ019067 | Unassigned | Unassigned | Unassigned | Overlap (VC_675/VC_684)        | Ref |
| KJ019068 | Unassigned | Unassigned | Unassigned | Overlap (VC_675/VC_684)        | Ref |
| KJ019071 | Unassigned | Unassigned | Unassigned | Overlap (VC_675/VC_683)        | Ref |
| KJ019076 | Unassigned | Unassigned | Unassigned | Overlap (VC_675/VC_684)        | Ref |
| KJ019081 | Unassigned | Unassigned | Unassigned | Overlap (VC_675/VC_684)        | Ref |
| KJ019084 | Unassigned | Unassigned | Unassigned | Overlap (VC_675/VC_684)        | Ref |
| KJ019087 | Unassigned | Unassigned | Unassigned | Overlap (VC_675/VC_684)        | Ref |
| KJ019088 | Unassigned | Unassigned | Unassigned | Overlap (VC_675/VC_684)        | Ref |
| KJ019104 | Unassigned | Unassigned | Unassigned | Overlap (VC_675/VC_683)        | Ref |
| KJ019108 | Unassigned | Unassigned | Unassigned | Overlap (VC_675/VC_683)        | Ref |
| KJ019109 | Unassigned | Unassigned | Unassigned | Overlap (VC_675/VC_683)        | Ref |
| KJ019110 | Unassigned | Unassigned | Unassigned | Overlap (VC_675/VC_683)        | Ref |
| KJ019114 | Unassigned | Unassigned | Unassigned | Overlap (VC_675/VC_684)        | Ref |
| KJ019116 | Unassigned | Unassigned | Unassigned | Overlap (VC_675/VC_684)        | Ref |
| KJ019122 | Unassigned | Unassigned | Unassigned | Overlap (VC_675/VC_684)        | Ref |
| KJ019128 | Unassigned | Unassigned | Unassigned | Overlap (VC_675/VC_683)        | Ref |
| KJ019132 | Unassigned | Unassigned | Unassigned | Overlap (VC_675/VC_683)        | Ref |
| KJ019133 | Unassigned | Unassigned | Unassigned | Overlap (VC_675/VC_683)        | Ref |
| KJ019134 | Unassigned | Unassigned | Unassigned | Overlap (VC_675/VC_683)        | Ref |
| KJ019135 | Unassigned | Unassigned | Unassigned | Overlap (VC_675/VC_684)        | Ref |
| KJ019137 | Unassigned | Unassigned | Unassigned | Overlap (VC_675/VC_684)        | Ref |
| KJ019138 | Unassigned | Unassigned | Unassigned | Overlap (VC_675/VC_684)        | Ref |
| KJ019153 | Unassigned | Unassigned | Unassigned | Overlap (VC_675/VC_684)        | Ref |
| KJ019154 | Unassigned | Unassigned | Unassigned | Overlap (VC_675/VC_683)        | Ref |
| KJ019157 | Unassigned | Unassigned | Unassigned | Overlap (VC_675/VC_684)        | Ref |
| KJ019158 | Unassigned | Unassigned | Unassigned | Overlap (VC_675/VC_684)        | Ref |
| KJ019161 | Unassigned | Unassigned | Unassigned | Overlap (VC_675/VC_683)        | Ref |
| KJ019163 | Unassigned | Unassigned | Unassigned | Overlap (VC_675/VC_684)        | Ref |
| KJ024807 | Unassigned | Unassigned | Unassigned | Overlap (VC_673/VC_764)        | Ref |
| KJ101592 | Unassigned | Unassigned | Unassigned | Overlap (VC_293/VC_297/VC_509) | Ref |
| KJ192196 | Unassigned | Unassigned | Unassigned | Outlier                        | Ref |
| KJ192399 | Unassigned | Unassigned | Unassigned | Outlier                        | Ref |
| KJ395778 | Unassigned | Unassigned | Unassigned | Outlier                        | Ref |
| KJ473423 | Unassigned | Unassigned | Unassigned | Outlier                        | Ref |
| KJ510412 | Unassigned | Unassigned | Unassigned | Overlap (VC_243/VC_245)        | Ref |
| KJ534580 | Unassigned | Unassigned | Unassigned | Singleton                      | Ref |
| KJ545483 | Unassigned | Unassigned | Unassigned | Overlap (VC_131/VC_729)        | Ref |
| KJ567041 | Unassigned | Unassigned | Unassigned | Overlap (VC_542/VC_566)        | Ref |
| KJ572845 | Unassigned | Unassigned | Unassigned | Overlap (VC_131/VC_729)        | Ref |
| KJ608188 | Unassigned | Unassigned | Unassigned | Outlier                        | Ref |
| KJ743987 | Unassigned | Unassigned | Unassigned | Outlier                        | Ref |
| KJ749827 | Unassigned | Unassigned | Unassigned | Overlap (VC_469/VC_1068)       | Ref |
| KJ920400 | Unassigned | Unassigned | Unassigned | Overlap (VC_673/VC_764)        | Ref |
| KJ944830 | Unassigned | Unassigned | Unassigned | Outlier                        | Ref |
| KM000061 | Unassigned | Unassigned | Unassigned | Outlier                        | Ref |
| KM066034 | Unassigned | Unassigned | Unassigned | Overlap (VC_539/VC_568)        | Ref |
| KM083128 | Unassigned | Unassigned | Unassigned | Outlier                        | Ref |
| KM091443 | Unassigned | Unassigned | Unassigned | Overlap (VC_211/VC_214)        | Ref |
| KM091444 | Unassigned | Unassigned | Unassigned | Overlap (VC_211/VC_214)        | Ref |
| KM101124 | Unassigned | Unassigned | Unassigned | Outlier                        | Ref |
| KM199771 | Unassigned | Unassigned | Unassigned | Outlier                        | Ref |
| KM209271 | Unassigned | Unassigned | Unassigned | Outlier                        | Ref |
| KM209294 | Unassigned | Unassigned | Unassigned | Outlier                        | Ref |
| KM215148 | Unassigned | Unassigned | Unassigned | Overlap (VC_539/VC_569)        | Ref |
| KM236240 | Unassigned | Unassigned | Unassigned | Overlap (VC_293/VC_297/VC_509) | Ref |
| KM378617 | Unassigned | Unassigned | Unassigned | Overlap (VC_771/VC_822)        | Ref |
| KM514685 | Unassigned | Unassigned | Unassigned | Outlier                        | Ref |
| KM589501 | Unassigned | Unassigned | Unassigned | Overlap (VC_1028/VC_1029)      | Ref |
| KM589506 | Unassigned | Unassigned | Unassigned | Outlier                        | Ref |
| KM879221 | Unassigned | Unassigned | Unassigned | Outlier                        | Ref |
| KM882824 | Unassigned | Unassigned | Unassigned | Overlap (VC_345/VC_429/VC_444) | Ref |
| KM983327 | Unassigned | Unassigned | Unassigned | Outlier                        | Ref |
| KM983330 | Unassigned | Unassigned | Unassigned | Overlap (VC_144/VC_147)        | Ref |
| KM983332 | Unassigned | Unassigned | Unassigned | Outlier                        | Ref |
| KM983333 | Unassigned | Unassigned | Unassigned | Overlap (VC_144/VC_147)        | Ref |
| KP027015 | Unassigned | Unassigned | Unassigned | Outlier                        | Ref |
| KP027206 | Unassigned | Unassigned | Unassigned | Overlap (VC_243/VC_245)        | Ref |
| KP054477 | Unassigned | Unassigned | Unassigned | Outlier                        | Ref |
| KP087937 | Unassigned | Unassigned | Unassigned | Singleton                      | Ref |
| KP087940 | Unassigned | Unassigned | Unassigned | Singleton                      | Ref |
| KP087941 | Unassigned | Unassigned | Unassigned | Overlap (VC_207/VC_411)        | Ref |
| KP087944 | Unassigned | Unassigned | Unassigned | Outlier                        | Ref |
| KP087946 | Unassigned | Unassigned | Unassigned | Overlap (VC_207/VC_412)        | Ref |



|          |            |            |            |                                |     |
|----------|------------|------------|------------|--------------------------------|-----|
| KP087947 | Unassigned | Unassigned | Unassigned | Singleton                      | Ref |
| KP087949 | Unassigned | Unassigned | Unassigned | Overlap (VC_207/VC_412)        | Ref |
| KP087950 | Unassigned | Unassigned | Unassigned | Singleton                      | Ref |
| KP087952 | Unassigned | Unassigned | Unassigned | Outlier                        | Ref |
| KP087956 | Unassigned | Unassigned | Unassigned | Outlier                        | Ref |
| KP137440 | Unassigned | Unassigned | Unassigned | Overlap (VC_188/VC_191)        | Ref |
| KP144388 | Unassigned | Unassigned | Unassigned | Outlier                        | Ref |
| KP162168 | Unassigned | Unassigned | Unassigned | Outlier                        | Ref |
| KP211958 | Unassigned | Unassigned | Unassigned | Outlier                        | Ref |
| KP282676 | Unassigned | Unassigned | Unassigned | Outlier                        | Ref |
| KP296792 | Unassigned | Unassigned | Unassigned | Outlier                        | Ref |
| KP682381 | Unassigned | Unassigned | Unassigned | Outlier                        | Ref |
| KP696447 | Unassigned | Unassigned | Unassigned | Overlap (VC_1042/VC_1043)      | Ref |
| KP696448 | Unassigned | Unassigned | Unassigned | Overlap (VC_1042/VC_1043)      | Ref |
| KP703175 | Unassigned | Unassigned | Unassigned | Singleton                      | Ref |
| KP735928 | Unassigned | Unassigned | Unassigned | Overlap (VC_14/VC_15)          | Ref |
| KP774835 | Unassigned | Unassigned | Unassigned | Outlier                        | Ref |
| KP792622 | Unassigned | Unassigned | Unassigned | Singleton                      | Ref |
| KP793101 | Unassigned | Unassigned | Unassigned | Overlap (VC_211/VC_215)        | Ref |
| KP793102 | Unassigned | Unassigned | Unassigned | Overlap (VC_211/VC_215)        | Ref |
| KP793103 | Unassigned | Unassigned | Unassigned | Overlap (VC_211/VC_215)        | Ref |
| KP793106 | Unassigned | Unassigned | Unassigned | Overlap (VC_211/VC_215)        | Ref |
| KP793107 | Unassigned | Unassigned | Unassigned | Overlap (VC_211/VC_216)        | Ref |
| KP793110 | Unassigned | Unassigned | Unassigned | Overlap (VC_211/VC_216)        | Ref |
| KP793112 | Unassigned | Unassigned | Unassigned | Overlap (VC_211/VC_216)        | Ref |
| KP793114 | Unassigned | Unassigned | Unassigned | Overlap (VC_211/VC_214)        | Ref |
| KP793119 | Unassigned | Unassigned | Unassigned | Overlap (VC_211/VC_217)        | Ref |
| KP793120 | Unassigned | Unassigned | Unassigned | Overlap (VC_211/VC_214)        | Ref |
| KP793121 | Unassigned | Unassigned | Unassigned | Overlap (VC_211/VC_214)        | Ref |
| KP793122 | Unassigned | Unassigned | Unassigned | Overlap (VC_211/VC_214)        | Ref |
| KP793125 | Unassigned | Unassigned | Unassigned | Overlap (VC_211/VC_214)        | Ref |
| KP793126 | Unassigned | Unassigned | Unassigned | Overlap (VC_211/VC_214)        | Ref |
| KP793127 | Unassigned | Unassigned | Unassigned | Overlap (VC_211/VC_214)        | Ref |
| KP793128 | Unassigned | Unassigned | Unassigned | Overlap (VC_211/VC_214)        | Ref |
| KP793130 | Unassigned | Unassigned | Unassigned | Overlap (VC_211/VC_214)        | Ref |
| KP793131 | Unassigned | Unassigned | Unassigned | Overlap (VC_211/VC_214)        | Ref |
| KP793132 | Unassigned | Unassigned | Unassigned | Overlap (VC_211/VC_214)        | Ref |
| KP793133 | Unassigned | Unassigned | Unassigned | Overlap (VC_211/VC_215)        | Ref |
| KP793135 | Unassigned | Unassigned | Unassigned | Overlap (VC_211/VC_214)        | Ref |
| KR011061 | Unassigned | Unassigned | Unassigned | Outlier                        | Ref |
| KR053194 | Unassigned | Unassigned | Unassigned | Outlier                        | Ref |
| KR053196 | Unassigned | Unassigned | Unassigned | Outlier                        | Ref |
| KR053197 | Unassigned | Unassigned | Unassigned | Overlap (VC_984/VC_985)        | Ref |
| KR053198 | Unassigned | Unassigned | Unassigned | Overlap (VC_984/VC_985)        | Ref |
| KR053199 | Unassigned | Unassigned | Unassigned | Outlier                        | Ref |
| KR053200 | Unassigned | Unassigned | Unassigned | Overlap (VC_1138/VC_1139)      | Ref |
| KR091942 | Unassigned | Unassigned | Unassigned | Outlier                        | Ref |
| KR093632 | Unassigned | Unassigned | Unassigned | Outlier                        | Ref |
| KR093638 | Unassigned | Unassigned | Unassigned | Outlier                        | Ref |
| KR131710 | Unassigned | Unassigned | Unassigned | Outlier                        | Ref |
| KR153873 | Unassigned | Unassigned | Unassigned | Outlier                        | Ref |
| KR296684 | Unassigned | Unassigned | Unassigned | Outlier                        | Ref |
| KR296685 | Unassigned | Unassigned | Unassigned | Outlier                        | Ref |
| KR296690 | Unassigned | Unassigned | Unassigned | Outlier                        | Ref |
| KR296693 | Unassigned | Unassigned | Unassigned | Outlier                        | Ref |
| KR296694 | Unassigned | Unassigned | Unassigned | Outlier                        | Ref |
| KR296695 | Unassigned | Unassigned | Unassigned | Outlier                        | Ref |
| KR704914 | Unassigned | Unassigned | Unassigned | Outlier                        | Ref |
| KR816341 | Unassigned | Unassigned | Unassigned | Outlier                        | Ref |
| KR905066 | Unassigned | Unassigned | Unassigned | Overlap (VC_280/VC_392)        | Ref |
| KR905067 | Unassigned | Unassigned | Unassigned | Overlap (VC_280/VC_392)        | Ref |
| KR905069 | Unassigned | Unassigned | Unassigned | Overlap (VC_280/VC_392)        | Ref |
| KR905070 | Unassigned | Unassigned | Unassigned | Overlap (VC_280/VC_392)        | Ref |
| KT001915 | Unassigned | Unassigned | Unassigned | Overlap (VC_293/VC_297/VC_509) | Ref |
| KT021004 | Unassigned | Unassigned | Unassigned | Outlier                        | Ref |
| KT070868 | Unassigned | Unassigned | Unassigned | Outlier                        | Ref |
| KT151959 | Unassigned | Unassigned | Unassigned | Outlier                        | Ref |
| KT184694 | Unassigned | Unassigned | Unassigned | Overlap (VC_234/VC_975)        | Ref |
| KT206225 | Unassigned | Unassigned | Unassigned | Outlier                        | Ref |
| KT221033 | Unassigned | Unassigned | Unassigned | Overlap (VC_389/VC_607)        | Ref |
| KT264762 | Unassigned | Unassigned | Unassigned | Outlier                        | Ref |
| KT264773 | Unassigned | Unassigned | Unassigned | Outlier                        | Ref |
| KT264777 | Unassigned | Unassigned | Unassigned | Overlap (VC_1155/VC_1156)      | Ref |
| KT264778 | Unassigned | Unassigned | Unassigned | Overlap (VC_1155/VC_1156)      | Ref |
| KT264780 | Unassigned | Unassigned | Unassigned | Singleton                      | Ref |
| KT264786 | Unassigned | Unassigned | Unassigned | Singleton                      | Ref |
| KT264787 | Unassigned | Unassigned | Unassigned | Singleton                      | Ref |
| KT264804 | Unassigned | Unassigned | Unassigned | Singleton                      | Ref |
| KT264807 | Unassigned | Unassigned | Unassigned | Outlier                        | Ref |
| KT264829 | Unassigned | Unassigned | Unassigned | Overlap (VC_1098/VC_1100)      | Ref |
| KT264832 | Unassigned | Unassigned | Unassigned | Singleton                      | Ref |



|          |            |            |            |                                |     |
|----------|------------|------------|------------|--------------------------------|-----|
| KT264835 | Unassigned | Unassigned | Unassigned | Outlier                        | Ref |
| KT266805 | Unassigned | Unassigned | Unassigned | Overlap (VC_175/VC_486)        | Ref |
| KT281789 | Unassigned | Unassigned | Unassigned | Overlap (VC_245/VC_247)        | Ref |
| KT319602 | Unassigned | Unassigned | Unassigned | Outlier                        | Ref |
| KT319607 | Unassigned | Unassigned | Unassigned | Outlier                        | Ref |
| KT319620 | Unassigned | Unassigned | Unassigned | Outlier                        | Ref |
| KT319626 | Unassigned | Unassigned | Unassigned | Outlier                        | Ref |
| KT337365 | Unassigned | Unassigned | Unassigned | Outlier                        | Ref |
| KT337370 | Unassigned | Unassigned | Unassigned | Overlap (VC_345/VC_429)        | Ref |
| KT339177 | Unassigned | Unassigned | Unassigned | Outlier                        | Ref |
| KT361651 | Unassigned | Unassigned | Unassigned | Overlap (VC_727/VC_731)        | Ref |
| KT361653 | Unassigned | Unassigned | Unassigned | Overlap (VC_727/VC_731)        | Ref |
| KT429161 | Unassigned | Unassigned | Unassigned | Overlap (VC_14/VC_15)          | Ref |
| KT588072 | Unassigned | Unassigned | Unassigned | Overlap (VC_711/VC_712)        | Ref |
| KT591490 | Unassigned | Unassigned | Unassigned | Overlap (VC_243/VC_245)        | Ref |
| KT630645 | Unassigned | Unassigned | Unassigned | Outlier                        | Ref |
| KT630646 | Unassigned | Unassigned | Unassigned | Outlier                        | Ref |
| KT630648 | Unassigned | Unassigned | Unassigned | Outlier                        | Ref |
| KT716399 | Unassigned | Unassigned | Unassigned | Outlier                        | Ref |
| KT724718 | Unassigned | Unassigned | Unassigned | Outlier                        | Ref |
| KT803877 | Unassigned | Unassigned | Unassigned | Overlap (VC_382/VC_506)        | Ref |
| KT820175 | Unassigned | Unassigned | Unassigned | Outlier                        | Ref |
| KT852574 | Unassigned | Unassigned | Unassigned | Outlier                        | Ref |
| KT898133 | Unassigned | Unassigned | Unassigned | Outlier                        | Ref |
| KT898134 | Unassigned | Unassigned | Unassigned | Outlier                        | Ref |
| KT967075 | Unassigned | Unassigned | Unassigned | Overlap (VC_720/VC_764)        | Ref |
| KT970645 | Unassigned | Unassigned | Unassigned | Overlap (VC_673/VC_764)        | Ref |
| KT970646 | Unassigned | Unassigned | Unassigned | Overlap (VC_673/VC_764)        | Ref |
| KU052038 | Unassigned | Unassigned | Unassigned | Outlier                        | Ref |
| KU160494 | Unassigned | Unassigned | Unassigned | Outlier                        | Ref |
| KU160495 | Unassigned | Unassigned | Unassigned | Outlier                        | Ref |
| KU160496 | Unassigned | Unassigned | Unassigned | Outlier                        | Ref |
| KU238067 | Unassigned | Unassigned | Unassigned | Outlier                        | Ref |
| KU252585 | Unassigned | Unassigned | Unassigned | Overlap (VC_544/VC_574)        | Ref |
| KU310944 | Unassigned | Unassigned | Unassigned | Outlier                        | Ref |
| KU594605 | Unassigned | Unassigned | Unassigned | Overlap (VC_449/VC_675)        | Ref |
| KU598975 | Unassigned | Unassigned | Unassigned | Overlap (VC_13/VC_29)          | Ref |
| KU645528 | Unassigned | Unassigned | Unassigned | Outlier                        | Ref |
| KU665491 | Unassigned | Unassigned | Unassigned | Outlier                        | Ref |
| KU682439 | Unassigned | Unassigned | Unassigned | Outlier                        | Ref |
| KU686203 | Unassigned | Unassigned | Unassigned | Overlap (VC_675/VC_681/VC_683) | Ref |
| KU686210 | Unassigned | Unassigned | Unassigned | Outlier                        | Ref |
| KU708005 | Unassigned | Unassigned | Unassigned | Singleton                      | Ref |
| KU848186 | Unassigned | Unassigned | Unassigned | Overlap (VC_280/VC_392)        | Ref |
| KU867307 | Unassigned | Unassigned | Unassigned | Overlap (VC_293/VC_297/VC_509) | Ref |
| KU873925 | Unassigned | Unassigned | Unassigned | Outlier                        | Ref |
| KU892558 | Unassigned | Unassigned | Unassigned | Outlier                        | Ref |
| KU935715 | Unassigned | Unassigned | Unassigned | Outlier                        | Ref |
| KU963248 | Unassigned | Unassigned | Unassigned | Outlier                        | Ref |
| KU977419 | Unassigned | Unassigned | Unassigned | Outlier                        | Ref |
| KU977420 | Unassigned | Unassigned | Unassigned | Outlier                        | Ref |
| KU981050 | Unassigned | Unassigned | Unassigned | Overlap (VC_277/VC_337)        | Ref |
| KU984979 | Unassigned | Unassigned | Unassigned | Overlap (VC_1228/VC_1229)      | Ref |
| KU984980 | Unassigned | Unassigned | Unassigned | Overlap (VC_1228/VC_1229)      | Ref |
| KU998233 | Unassigned | Unassigned | Unassigned | Outlier                        | Ref |
| KU998255 | Unassigned | Unassigned | Unassigned | Overlap (VC_984/VC_985)        | Ref |
| KU998256 | Unassigned | Unassigned | Unassigned | Overlap (VC_984/VC_985)        | Ref |
| KX066068 | Unassigned | Unassigned | Unassigned | Overlap (VC_72/VC_75)          | Ref |
| KX077889 | Unassigned | Unassigned | Unassigned | Overlap (VC_325/VC_812)        | Ref |
| KX077890 | Unassigned | Unassigned | Unassigned | Outlier                        | Ref |
| KX077891 | Unassigned | Unassigned | Unassigned | Outlier                        | Ref |
| KX077895 | Unassigned | Unassigned | Unassigned | Outlier                        | Ref |
| KX119178 | Unassigned | Unassigned | Unassigned | Outlier                        | Ref |
| KX119181 | Unassigned | Unassigned | Unassigned | Outlier                        | Ref |
| KX119183 | Unassigned | Unassigned | Unassigned | Outlier                        | Ref |
| KX130668 | Unassigned | Unassigned | Unassigned | Overlap (VC_472/VC_605)        | Ref |
| KX156762 | Unassigned | Unassigned | Unassigned | Overlap (VC_14/VC_15)          | Ref |
| KX160205 | Unassigned | Unassigned | Unassigned | Overlap (VC_263/VC_268)        | Ref |
| KX160207 | Unassigned | Unassigned | Unassigned | Overlap (VC_263/VC_268)        | Ref |
| KX160208 | Unassigned | Unassigned | Unassigned | Overlap (VC_263/VC_268)        | Ref |
| KX160212 | Unassigned | Unassigned | Unassigned | Overlap (VC_263/VC_268)        | Ref |
| KX160213 | Unassigned | Unassigned | Unassigned | Overlap (VC_263/VC_268)        | Ref |
| KX160214 | Unassigned | Unassigned | Unassigned | Overlap (VC_263/VC_268)        | Ref |
| KX160215 | Unassigned | Unassigned | Unassigned | Overlap (VC_263/VC_268)        | Ref |
| KX160216 | Unassigned | Unassigned | Unassigned | Overlap (VC_263/VC_268/VC_278) | Ref |
| KX160217 | Unassigned | Unassigned | Unassigned | Overlap (VC_263/VC_268/VC_278) | Ref |
| KX160218 | Unassigned | Unassigned | Unassigned | Overlap (VC_263/VC_268/VC_278) | Ref |
| KX198612 | Unassigned | Unassigned | Unassigned | Outlier                        | Ref |
| KX228399 | Unassigned | Unassigned | Unassigned | Overlap (VC_141/VC_669)        | Ref |
| KX228400 | Unassigned | Unassigned | Unassigned | Overlap (VC_141/VC_669)        | Ref |
| KX268652 | Unassigned | Unassigned | Unassigned | Outlier                        | Ref |



[illegible]



|          |            |            |            |                                       |     |
|----------|------------|------------|------------|---------------------------------------|-----|
| KY065481 | Unassigned | Unassigned | Unassigned | Overlap (VC_345/VC_429)               | Ref |
| KY065482 | Unassigned | Unassigned | Unassigned | Overlap (VC_345/VC_429)               | Ref |
| KY065483 | Unassigned | Unassigned | Unassigned | Overlap (VC_345/VC_429)               | Ref |
| KY065484 | Unassigned | Unassigned | Unassigned | Overlap (VC_345/VC_429)               | Ref |
| KY065489 | Unassigned | Unassigned | Unassigned | Overlap (VC_345/VC_429)               | Ref |
| KY065498 | Unassigned | Unassigned | Unassigned | Outlier                               | Ref |
| KY124276 | Unassigned | Unassigned | Unassigned | Overlap (VC_405/VC_408)               | Ref |
| KY245949 | Unassigned | Unassigned | Unassigned | Outlier                               | Ref |
| KY245950 | Unassigned | Unassigned | Unassigned | Outlier                               | Ref |
| KY250034 | Unassigned | Unassigned | Unassigned | Overlap (VC_469/VC_1068)              | Ref |
| KY250035 | Unassigned | Unassigned | Unassigned | Overlap (VC_405/VC_408)               | Ref |
| KY271399 | Unassigned | Unassigned | Unassigned | Overlap (VC_39/VC_62)                 | Ref |
| KY271400 | Unassigned | Unassigned | Unassigned | Outlier                               | Ref |
| KY363359 | Unassigned | Unassigned | Unassigned | Overlap (VC_345/VC_429/VC_444/VC_799) | Ref |
| KY417925 | Unassigned | Unassigned | Unassigned | Outlier                               | Ref |
| KY420199 | Unassigned | Unassigned | Unassigned | Outlier                               | Ref |
| KY421186 | Unassigned | Unassigned | Unassigned | Outlier                               | Ref |
| KY442063 | Unassigned | Unassigned | Unassigned | Overlap (VC_99/VC_101)                | Ref |
| KY471386 | Unassigned | Unassigned | Unassigned | Overlap (VC_99/VC_101)                | Ref |
| KY499642 | Unassigned | Unassigned | Unassigned | Outlier                               | Ref |
| KY606587 | Unassigned | Unassigned | Unassigned | Outlier                               | Ref |
| KY619305 | Unassigned | Unassigned | Unassigned | Overlap (VC_472/VC_605)               | Ref |
| KY629621 | Unassigned | Unassigned | Unassigned | Overlap (VC_147/VC_150)               | Ref |
| KY653116 | Unassigned | Unassigned | Unassigned | Outlier                               | Ref |
| KY653117 | Unassigned | Unassigned | Unassigned | Outlier                               | Ref |
| KY653118 | Unassigned | Unassigned | Unassigned | Outlier                               | Ref |
| KY653119 | Unassigned | Unassigned | Unassigned | Outlier                               | Ref |
| KY653120 | Unassigned | Unassigned | Unassigned | Overlap (VC_13/VC_29)                 | Ref |
| KY653124 | Unassigned | Unassigned | Unassigned | Overlap (VC_14/VC_15)                 | Ref |
| KY653126 | Unassigned | Unassigned | Unassigned | Overlap (VC_14/VC_15)                 | Ref |
| KY653127 | Unassigned | Unassigned | Unassigned | Outlier                               | Ref |
| KY653129 | Unassigned | Unassigned | Unassigned | Outlier                               | Ref |
| KY695239 | Unassigned | Unassigned | Unassigned | Outlier                               | Ref |
| KY695241 | Unassigned | Unassigned | Unassigned | Outlier                               | Ref |
| KY697807 | Unassigned | Unassigned | Unassigned | Singleton                             | Ref |
| KY702574 | Unassigned | Unassigned | Unassigned | Overlap (VC_539/VC_569)               | Ref |
| KY709687 | Unassigned | Unassigned | Unassigned | Outlier                               | Ref |
| KY742649 | Unassigned | Unassigned | Unassigned | Overlap (VC_965/VC_1091)              | Ref |
| KY744240 | Unassigned | Unassigned | Unassigned | Overlap (VC_277/VC_337)               | Ref |
| KY798216 | Unassigned | Unassigned | Unassigned | Outlier                               | Ref |
| KY888885 | Unassigned | Unassigned | Unassigned | Outlier                               | Ref |
| KY914485 | Unassigned | Unassigned | Unassigned | Outlier                               | Ref |
| KY940711 | Unassigned | Unassigned | Unassigned | Outlier                               | Ref |
| KY945241 | Unassigned | Unassigned | Unassigned | Overlap (VC_449/VC_675)               | Ref |
| KY971609 | Unassigned | Unassigned | Unassigned | Overlap (VC_615/VC_616)               | Ref |
| KY979108 | Unassigned | Unassigned | Unassigned | Overlap (VC_33/VC_37)                 | Ref |
| KY979132 | Unassigned | Unassigned | Unassigned | Outlier                               | Ref |
| KY981271 | Unassigned | Unassigned | Unassigned | Outlier                               | Ref |
| LC121084 | Unassigned | Unassigned | Unassigned | Outlier                               | Ref |
| LC208019 | Unassigned | Unassigned | Unassigned | Singleton                             | Ref |
| LC216347 | Unassigned | Unassigned | Unassigned | Overlap (VC_405/VC_408)               | Ref |
| LC371242 | Unassigned | Unassigned | Unassigned | Overlap (VC_293/VC_509)               | Ref |
| LC483177 | Unassigned | Unassigned | Unassigned | Outlier                               | Ref |
| LC487996 | Unassigned | Unassigned | Unassigned | Outlier                               | Ref |
| LC487997 | Unassigned | Unassigned | Unassigned | Outlier                               | Ref |
| LC513943 | Unassigned | Unassigned | Unassigned | Overlap (VC_711/VC_712)               | Ref |
| LC554890 | Unassigned | Unassigned | Unassigned | Outlier                               | Ref |
| LC557520 | Unassigned | Unassigned | Unassigned | Outlier                               | Ref |
| LC567818 | Unassigned | Unassigned | Unassigned | Overlap (VC_43/VC_44)                 | Ref |
| LC567819 | Unassigned | Unassigned | Unassigned | Overlap (VC_43/VC_44)                 | Ref |
| LC567820 | Unassigned | Unassigned | Unassigned | Overlap (VC_43/VC_44)                 | Ref |
| LC567821 | Unassigned | Unassigned | Unassigned | Overlap (VC_43/VC_44)                 | Ref |
| LC567822 | Unassigned | Unassigned | Unassigned | Overlap (VC_43/VC_44/VC_437)          | Ref |
| LC567823 | Unassigned | Unassigned | Unassigned | Overlap (VC_43/VC_44)                 | Ref |
| LC567824 | Unassigned | Unassigned | Unassigned | Overlap (VC_43/VC_44)                 | Ref |
| LC567825 | Unassigned | Unassigned | Unassigned | Overlap (VC_43/VC_44)                 | Ref |
| LC567826 | Unassigned | Unassigned | Unassigned | Overlap (VC_43/VC_44/VC_437)          | Ref |
| LC567827 | Unassigned | Unassigned | Unassigned | Overlap (VC_43/VC_44)                 | Ref |
| LC567828 | Unassigned | Unassigned | Unassigned | Overlap (VC_43/VC_44/VC_437)          | Ref |
| LC567829 | Unassigned | Unassigned | Unassigned | Overlap (VC_43/VC_44)                 | Ref |
| LC567831 | Unassigned | Unassigned | Unassigned | Overlap (VC_43/VC_44)                 | Ref |
| LC567832 | Unassigned | Unassigned | Unassigned | Overlap (VC_43/VC_44/VC_437)          | Ref |
| LC567833 | Unassigned | Unassigned | Unassigned | Overlap (VC_43/VC_44)                 | Ref |
| LC567834 | Unassigned | Unassigned | Unassigned | Overlap (VC_43/VC_44)                 | Ref |
| LC567835 | Unassigned | Unassigned | Unassigned | Overlap (VC_43/VC_44)                 | Ref |
| LC567836 | Unassigned | Unassigned | Unassigned | Overlap (VC_43/VC_44/VC_437)          | Ref |
| LC567837 | Unassigned | Unassigned | Unassigned | Overlap (VC_43/VC_44)                 | Ref |
| LC567839 | Unassigned | Unassigned | Unassigned | Overlap (VC_43/VC_44/VC_437)          | Ref |
| LC567840 | Unassigned | Unassigned | Unassigned | Overlap (VC_43/VC_44)                 | Ref |
| LC567841 | Unassigned | Unassigned | Unassigned | Overlap (VC_43/VC_44)                 | Ref |
| LC592711 | Unassigned | Unassigned | Unassigned | Overlap (VC_356/VC_358)               | Ref |



|          |            |            |            |                                |     |
|----------|------------|------------|------------|--------------------------------|-----|
| LC644971 | Unassigned | Unassigned | Unassigned | Outlier                        | Ref |
| LC644973 | Unassigned | Unassigned | Unassigned | Outlier                        | Ref |
| LC645439 | Unassigned | Unassigned | Unassigned | Outlier                        | Ref |
| LC645440 | Unassigned | Unassigned | Unassigned | Outlier                        | Ref |
| LC645441 | Unassigned | Unassigned | Unassigned | Outlier                        | Ref |
| LC647030 | Unassigned | Unassigned | Unassigned | Overlap (VC_158/VC_159)        | Ref |
| LC667450 | Unassigned | Unassigned | Unassigned | Overlap (VC_356/VC_358)        | Ref |
| LC727876 | Unassigned | Unassigned | Unassigned | Overlap (VC_44/VC_59)          | Ref |
| LC727877 | Unassigned | Unassigned | Unassigned | Overlap (VC_44/VC_59)          | Ref |
| LC727878 | Unassigned | Unassigned | Unassigned | Overlap (VC_44/VC_59)          | Ref |
| LC727879 | Unassigned | Unassigned | Unassigned | Overlap (VC_44/VC_59)          | Ref |
| LC727880 | Unassigned | Unassigned | Unassigned | Overlap (VC_44/VC_59)          | Ref |
| LC727881 | Unassigned | Unassigned | Unassigned | Overlap (VC_44/VC_59)          | Ref |
| LC727882 | Unassigned | Unassigned | Unassigned | Overlap (VC_44/VC_59)          | Ref |
| LC727883 | Unassigned | Unassigned | Unassigned | Overlap (VC_44/VC_59)          | Ref |
| LC727884 | Unassigned | Unassigned | Unassigned | Overlap (VC_44/VC_59)          | Ref |
| LC727885 | Unassigned | Unassigned | Unassigned | Overlap (VC_44/VC_59)          | Ref |
| LC727886 | Unassigned | Unassigned | Unassigned | Overlap (VC_44/VC_59)          | Ref |
| LC727887 | Unassigned | Unassigned | Unassigned | Overlap (VC_44/VC_59)          | Ref |
| LC727888 | Unassigned | Unassigned | Unassigned | Overlap (VC_44/VC_59)          | Ref |
| LC727889 | Unassigned | Unassigned | Unassigned | Overlap (VC_44/VC_59)          | Ref |
| LC727890 | Unassigned | Unassigned | Unassigned | Overlap (VC_44/VC_59)          | Ref |
| LC727904 | Unassigned | Unassigned | Unassigned | Outlier                        | Ref |
| LN681539 | Unassigned | Unassigned | Unassigned | Overlap (VC_141/VC_669)        | Ref |
| LN885237 | Unassigned | Unassigned | Unassigned | Outlier                        | Ref |
| LN889991 | Unassigned | Unassigned | Unassigned | Overlap (VC_34/VC_35/VC_932)   | Ref |
| LN889992 | Unassigned | Unassigned | Unassigned | Overlap (VC_34/VC_35/VC_932)   | Ref |
| LN889993 | Unassigned | Unassigned | Unassigned | Outlier                        | Ref |
| LN890663 | Unassigned | Unassigned | Unassigned | Overlap (VC_767/VC_768)        | Ref |
| LN997803 | Unassigned | Unassigned | Unassigned | Outlier                        | Ref |
| LR595862 | Unassigned | Unassigned | Unassigned | Outlier                        | Ref |
| LR597642 | Unassigned | Unassigned | Unassigned | Outlier                        | Ref |
| LR597645 | Unassigned | Unassigned | Unassigned | Outlier                        | Ref |
| LR745208 | Unassigned | Unassigned | Unassigned | Outlier                        | Ref |
| LR756500 | Unassigned | Unassigned | Unassigned | Outlier                        | Ref |
| LR756508 | Unassigned | Unassigned | Unassigned | Outlier                        | Ref |
| LR756511 | Unassigned | Unassigned | Unassigned | Outlier                        | Ref |
| LR881103 | Unassigned | Unassigned | Unassigned | Outlier                        | Ref |
| LR990833 | Unassigned | Unassigned | Unassigned | Overlap (VC_711/VC_712)        | Ref |
| LR990834 | Unassigned | Unassigned | Unassigned | Outlier                        | Ref |
| LR991625 | Unassigned | Unassigned | Unassigned | Overlap (VC_711/VC_712)        | Ref |
| LT600745 | Unassigned | Unassigned | Unassigned | Outlier                        | Ref |
| LT614807 | Unassigned | Unassigned | Unassigned | Overlap (VC_293/VC_297/VC_509) | Ref |
| LT960607 | Unassigned | Unassigned | Unassigned | Outlier                        | Ref |
| LT960610 | Unassigned | Unassigned | Unassigned | Overlap (VC_89/VC_90)          | Ref |
| LT985570 | Unassigned | Unassigned | Unassigned | Overlap (VC_263/VC_268)        | Ref |
| LT985573 | Unassigned | Unassigned | Unassigned | Outlier                        | Ref |
| LT985577 | Unassigned | Unassigned | Unassigned | Outlier                        | Ref |
| LT985579 | Unassigned | Unassigned | Unassigned | Outlier                        | Ref |
| LT985580 | Unassigned | Unassigned | Unassigned | Singleton                      | Ref |
| LT985582 | Unassigned | Unassigned | Unassigned | Overlap (VC_278/VC_299)        | Ref |
| LT985585 | Unassigned | Unassigned | Unassigned | Overlap (VC_278/VC_299)        | Ref |
| LT985588 | Unassigned | Unassigned | Unassigned | Outlier                        | Ref |
| LT985590 | Unassigned | Unassigned | Unassigned | Singleton                      | Ref |
| LT985591 | Unassigned | Unassigned | Unassigned | Outlier                        | Ref |
| LT985592 | Unassigned | Unassigned | Unassigned | Outlier                        | Ref |
| LT992259 | Unassigned | Unassigned | Unassigned | Outlier                        | Ref |
| LT993225 | Unassigned | Unassigned | Unassigned | Outlier                        | Ref |
| LT996072 | Unassigned | Unassigned | Unassigned | Overlap (VC_278/VC_299)        | Ref |
| LT996073 | Unassigned | Unassigned | Unassigned | Outlier                        | Ref |
| LT996074 | Unassigned | Unassigned | Unassigned | Outlier                        | Ref |
| LT996075 | Unassigned | Unassigned | Unassigned | Overlap (VC_263/VC_268)        | Ref |
| LT996076 | Unassigned | Unassigned | Unassigned | Overlap (VC_267/VC_271)        | Ref |
| LT996077 | Unassigned | Unassigned | Unassigned | Outlier                        | Ref |
| LT996078 | Unassigned | Unassigned | Unassigned | Outlier                        | Ref |
| LT996079 | Unassigned | Unassigned | Unassigned | Outlier                        | Ref |
| MF001367 | Unassigned | Unassigned | Unassigned | Outlier                        | Ref |
| MF036690 | Unassigned | Unassigned | Unassigned | Overlap (VC_293/VC_509)        | Ref |
| MF036691 | Unassigned | Unassigned | Unassigned | Overlap (VC_293/VC_509)        | Ref |
| MF036692 | Unassigned | Unassigned | Unassigned | Overlap (VC_293/VC_509)        | Ref |
| MF042361 | Unassigned | Unassigned | Unassigned | Outlier                        | Ref |
| MF140408 | Unassigned | Unassigned | Unassigned | Overlap (VC_243/VC_245)        | Ref |
| MF140411 | Unassigned | Unassigned | Unassigned | Overlap (VC_243/VC_245)        | Ref |
| MF141539 | Unassigned | Unassigned | Unassigned | Outlier                        | Ref |
| MF176161 | Unassigned | Unassigned | Unassigned | Outlier                        | Ref |
| MF185726 | Unassigned | Unassigned | Unassigned | Overlap (VC_917/VC_919)        | Ref |
| MF186604 | Unassigned | Unassigned | Unassigned | Singleton                      | Ref |
| MF190168 | Unassigned | Unassigned | Unassigned | Overlap (VC_539/VC_568)        | Ref |
| MF360958 | Unassigned | Unassigned | Unassigned | Outlier                        | Ref |
| MF361639 | Unassigned | Unassigned | Unassigned | Singleton                      | Ref |
| MF403008 | Unassigned | Unassigned | Unassigned | Outlier                        | Ref |



[illegible]



|          |            |            |            |                                   |     |
|----------|------------|------------|------------|-----------------------------------|-----|
| MG575420 | Unassigned | Unassigned | Unassigned | Overlap (VC_965/VC_1091)          | Ref |
| MG584725 | Unassigned | Unassigned | Unassigned | Outlier                           | Ref |
| MG592413 | Unassigned | Unassigned | Unassigned | Outlier                           | Ref |
| MG592433 | Unassigned | Unassigned | Unassigned | Outlier                           | Ref |
| MG592452 | Unassigned | Unassigned | Unassigned | Overlap (VC_663/VC_980)           | Ref |
| MG592459 | Unassigned | Unassigned | Unassigned | Outlier                           | Ref |
| MG592473 | Unassigned | Unassigned | Unassigned | Outlier                           | Ref |
| MG592491 | Unassigned | Unassigned | Unassigned | Overlap (VC_771/VC_822)           | Ref |
| MG592498 | Unassigned | Unassigned | Unassigned | Outlier                           | Ref |
| MG592515 | Unassigned | Unassigned | Unassigned | Outlier                           | Ref |
| MG592537 | Unassigned | Unassigned | Unassigned | Outlier                           | Ref |
| MG592548 | Unassigned | Unassigned | Unassigned | Outlier                           | Ref |
| MG592574 | Unassigned | Unassigned | Unassigned | Outlier                           | Ref |
| MG592575 | Unassigned | Unassigned | Unassigned | Overlap (VC_47/VC_49)             | Ref |
| MG592577 | Unassigned | Unassigned | Unassigned | Overlap (VC_771/VC_822)           | Ref |
| MG592580 | Unassigned | Unassigned | Unassigned | Overlap (VC_663/VC_980)           | Ref |
| MG592615 | Unassigned | Unassigned | Unassigned | Outlier                           | Ref |
| MG592643 | Unassigned | Unassigned | Unassigned | Outlier                           | Ref |
| MG592667 | Unassigned | Unassigned | Unassigned | Overlap (VC_771/VC_822)           | Ref |
| MG593801 | Unassigned | Unassigned | Unassigned | Outlier                           | Ref |
| MG603697 | Unassigned | Unassigned | Unassigned | Outlier                           | Ref |
| MG641181 | Unassigned | Unassigned | Unassigned | Singleton                         | Ref |
| MG641182 | Unassigned | Unassigned | Unassigned | Outlier                           | Ref |
| MG641187 | Unassigned | Unassigned | Unassigned | Overlap (VC_1120/VC_1121)         | Ref |
| MG641885 | Unassigned | Unassigned | Unassigned | Overlap (VC_477/VC_629)           | Ref |
| MG652450 | Unassigned | Unassigned | Unassigned | Overlap (VC_72/VC_73)             | Ref |
| MG696115 | Unassigned | Unassigned | Unassigned | Outlier                           | Ref |
| MG710484 | Unassigned | Unassigned | Unassigned | Overlap (VC_720/VC_764)           | Ref |
| MG711463 | Unassigned | Unassigned | Unassigned | Overlap (VC_1086/VC_1243)         | Ref |
| MG711464 | Unassigned | Unassigned | Unassigned | Outlier                           | Ref |
| MG711465 | Unassigned | Unassigned | Unassigned | Outlier                           | Ref |
| MG711467 | Unassigned | Unassigned | Unassigned | Overlap (VC_730/VC_733)           | Ref |
| MG711516 | Unassigned | Unassigned | Unassigned | Overlap (VC_497/VC_498/VC_500)    | Ref |
| MG720308 | Unassigned | Unassigned | Unassigned | Overlap (VC_456/VC_457)           | Ref |
| MG727697 | Unassigned | Unassigned | Unassigned | Outlier                           | Ref |
| MG732930 | Unassigned | Unassigned | Unassigned | Outlier                           | Ref |
| MG746602 | Unassigned | Unassigned | Unassigned | Overlap (VC_509/VC_510)           | Ref |
| MG752970 | Unassigned | Unassigned | Unassigned | Outlier                           | Ref |
| MG770213 | Unassigned | Unassigned | Unassigned | Overlap (VC_539/VC_568)           | Ref |
| MG775259 | Unassigned | Unassigned | Unassigned | Outlier                           | Ref |
| MG775261 | Unassigned | Unassigned | Unassigned | Overlap (VC_72/VC_75)             | Ref |
| MG779474 | Unassigned | Unassigned | Unassigned | Overlap (VC_211/VC_214)           | Ref |
| MG835450 | Unassigned | Unassigned | Unassigned | Singleton                         | Ref |
| MG835858 | Unassigned | Unassigned | Unassigned | Overlap (VC_612/VC_617)           | Ref |
| MG839019 | Unassigned | Unassigned | Unassigned | Overlap (VC_1297/VC_1298)         | Ref |
| MG839024 | Unassigned | Unassigned | Unassigned | Overlap (VC_1297/VC_1298)         | Ref |
| MG839025 | Unassigned | Unassigned | Unassigned | Overlap (VC_1297/VC_1298)         | Ref |
| MG839030 | Unassigned | Unassigned | Unassigned | Overlap (VC_1297/VC_1298)         | Ref |
| MG845393 | Unassigned | Unassigned | Unassigned | Overlap (VC_544/VC_574)           | Ref |
| MG845683 | Unassigned | Unassigned | Unassigned | Outlier                           | Ref |
| MG883721 | Unassigned | Unassigned | Unassigned | Singleton                         | Ref |
| MG945132 | Unassigned | Unassigned | Unassigned | Overlap (VC_1095/VC_1096)         | Ref |
| MG945133 | Unassigned | Unassigned | Unassigned | Overlap (VC_1311/VC_1312/VC_1313) | Ref |
| MG945137 | Unassigned | Unassigned | Unassigned | Singleton                         | Ref |
| MG945155 | Unassigned | Unassigned | Unassigned | Outlier                           | Ref |
| MG945156 | Unassigned | Unassigned | Unassigned | Overlap (VC_1097/VC_1103)         | Ref |
| MG945180 | Unassigned | Unassigned | Unassigned | Singleton                         | Ref |
| MG945182 | Unassigned | Unassigned | Unassigned | Singleton                         | Ref |
| MG945184 | Unassigned | Unassigned | Unassigned | Singleton                         | Ref |
| MG945187 | Unassigned | Unassigned | Unassigned | Overlap (VC_1323/VC_1324)         | Ref |
| MG945191 | Unassigned | Unassigned | Unassigned | Outlier                           | Ref |
| MG945216 | Unassigned | Unassigned | Unassigned | Singleton                         | Ref |
| MG945231 | Unassigned | Unassigned | Unassigned | Overlap (VC_1153/VC_1172)         | Ref |
| MG945239 | Unassigned | Unassigned | Unassigned | Outlier                           | Ref |
| MG945240 | Unassigned | Unassigned | Unassigned | Outlier                           | Ref |
| MG945253 | Unassigned | Unassigned | Unassigned | Outlier                           | Ref |
| MG945259 | Unassigned | Unassigned | Unassigned | Singleton                         | Ref |
| MG945262 | Unassigned | Unassigned | Unassigned | Singleton                         | Ref |
| MG945264 | Unassigned | Unassigned | Unassigned | Outlier                           | Ref |
| MG945265 | Unassigned | Unassigned | Unassigned | Overlap (VC_1095/VC_1097/VC_1103) | Ref |
| MG945266 | Unassigned | Unassigned | Unassigned | Singleton                         | Ref |
| MG945277 | Unassigned | Unassigned | Unassigned | Singleton                         | Ref |
| MG945281 | Unassigned | Unassigned | Unassigned | Outlier                           | Ref |
| MG945283 | Unassigned | Unassigned | Unassigned | Overlap (VC_1169/VC_1173/VC_1177) | Ref |
| MG945306 | Unassigned | Unassigned | Unassigned | Outlier                           | Ref |
| MG945307 | Unassigned | Unassigned | Unassigned | Outlier                           | Ref |
| MG945308 | Unassigned | Unassigned | Unassigned | Singleton                         | Ref |
| MG945313 | Unassigned | Unassigned | Unassigned | Overlap (VC_207/VC_411)           | Ref |
| MG945315 | Unassigned | Unassigned | Unassigned | Outlier                           | Ref |
| MG945317 | Unassigned | Unassigned | Unassigned | Outlier                           | Ref |
| MG945321 | Unassigned | Unassigned | Unassigned | Overlap (VC_1323/VC_1324)         | Ref |



|          |            |            |            |                                           |     |
|----------|------------|------------|------------|-------------------------------------------|-----|
| MG945322 | Unassigned | Unassigned | Unassigned | Overlap (VC_207/VC_411)                   | Ref |
| MG945326 | Unassigned | Unassigned | Unassigned | Singleton                                 | Ref |
| MG945328 | Unassigned | Unassigned | Unassigned | Outlier                                   | Ref |
| MG945342 | Unassigned | Unassigned | Unassigned | Outlier                                   | Ref |
| MG945353 | Unassigned | Unassigned | Unassigned | Overlap (VC_1323/VC_1324)                 | Ref |
| MG945356 | Unassigned | Unassigned | Unassigned | Outlier                                   | Ref |
| MG945358 | Unassigned | Unassigned | Unassigned | Singleton                                 | Ref |
| MG945388 | Unassigned | Unassigned | Unassigned | Outlier                                   | Ref |
| MG945397 | Unassigned | Unassigned | Unassigned | Overlap (VC_1359/VC_1360)                 | Ref |
| MG945400 | Unassigned | Unassigned | Unassigned | Singleton                                 | Ref |
| MG945406 | Unassigned | Unassigned | Unassigned | Outlier                                   | Ref |
| MG945422 | Unassigned | Unassigned | Unassigned | Singleton                                 | Ref |
| MG945423 | Unassigned | Unassigned | Unassigned | Outlier                                   | Ref |
| MG945428 | Unassigned | Unassigned | Unassigned | Outlier                                   | Ref |
| MG945436 | Unassigned | Unassigned | Unassigned | Singleton                                 | Ref |
| MG945440 | Unassigned | Unassigned | Unassigned | Outlier                                   | Ref |
| MG945442 | Unassigned | Unassigned | Unassigned | Outlier                                   | Ref |
| MG945443 | Unassigned | Unassigned | Unassigned | Singleton                                 | Ref |
| MG945446 | Unassigned | Unassigned | Unassigned | Outlier                                   | Ref |
| MG945450 | Unassigned | Unassigned | Unassigned | Overlap (VC_1097/VC_1103)                 | Ref |
| MG945451 | Unassigned | Unassigned | Unassigned | Singleton                                 | Ref |
| MG945454 | Unassigned | Unassigned | Unassigned | Outlier                                   | Ref |
| MG945460 | Unassigned | Unassigned | Unassigned | Overlap (VC_1311/VC_1313)                 | Ref |
| MG945466 | Unassigned | Unassigned | Unassigned | Outlier                                   | Ref |
| MG945471 | Unassigned | Unassigned | Unassigned | Singleton                                 | Ref |
| MG945474 | Unassigned | Unassigned | Unassigned | Overlap (VC_207/VC_412/VC_414)            | Ref |
| MG945479 | Unassigned | Unassigned | Unassigned | Overlap (VC_1096/VC_1097)                 | Ref |
| MG945484 | Unassigned | Unassigned | Unassigned | Outlier                                   | Ref |
| MG945491 | Unassigned | Unassigned | Unassigned | Overlap (VC_1096/VC_1097)                 | Ref |
| MG945493 | Unassigned | Unassigned | Unassigned | Outlier                                   | Ref |
| MG945496 | Unassigned | Unassigned | Unassigned | Overlap (VC_1311/VC_1313)                 | Ref |
| MG945503 | Unassigned | Unassigned | Unassigned | Outlier                                   | Ref |
| MG945510 | Unassigned | Unassigned | Unassigned | Singleton                                 | Ref |
| MG945513 | Unassigned | Unassigned | Unassigned | Outlier                                   | Ref |
| MG945516 | Unassigned | Unassigned | Unassigned | Singleton                                 | Ref |
| MG945521 | Unassigned | Unassigned | Unassigned | Singleton                                 | Ref |
| MG945522 | Unassigned | Unassigned | Unassigned | Overlap (VC_1311/VC_1312/VC_1313)         | Ref |
| MG945523 | Unassigned | Unassigned | Unassigned | Singleton                                 | Ref |
| MG945527 | Unassigned | Unassigned | Unassigned | Singleton                                 | Ref |
| MG945528 | Unassigned | Unassigned | Unassigned | Overlap (VC_1096/VC_1100)                 | Ref |
| MG945530 | Unassigned | Unassigned | Unassigned | Outlier                                   | Ref |
| MG945532 | Unassigned | Unassigned | Unassigned | Singleton                                 | Ref |
| MG945535 | Unassigned | Unassigned | Unassigned | Overlap (VC_1376/VC_1377)                 | Ref |
| MG945536 | Unassigned | Unassigned | Unassigned | Outlier                                   | Ref |
| MG945537 | Unassigned | Unassigned | Unassigned | Singleton                                 | Ref |
| MG945543 | Unassigned | Unassigned | Unassigned | Overlap (VC_1169/VC_1173/VC_1177)         | Ref |
| MG945545 | Unassigned | Unassigned | Unassigned | Overlap (VC_1173/VC_1174/VC_1177/VC_1343) | Ref |
| MG945547 | Unassigned | Unassigned | Unassigned | Singleton                                 | Ref |
| MG945552 | Unassigned | Unassigned | Unassigned | Overlap (VC_1176/VC_1366/VC_1381)         | Ref |
| MG945555 | Unassigned | Unassigned | Unassigned | Singleton                                 | Ref |
| MG945558 | Unassigned | Unassigned | Unassigned | Overlap (VC_1236/VC_1240)                 | Ref |
| MG945560 | Unassigned | Unassigned | Unassigned | Overlap (VC_1098/VC_1100)                 | Ref |
| MG945577 | Unassigned | Unassigned | Unassigned | Overlap (VC_1162/VC_1164)                 | Ref |
| MG945581 | Unassigned | Unassigned | Unassigned | Overlap (VC_1236/VC_1240)                 | Ref |
| MG945583 | Unassigned | Unassigned | Unassigned | Overlap (VC_1096/VC_1097)                 | Ref |
| MG945588 | Unassigned | Unassigned | Unassigned | Outlier                                   | Ref |
| MG945590 | Unassigned | Unassigned | Unassigned | Overlap (VC_1381/VC_1382)                 | Ref |
| MG945591 | Unassigned | Unassigned | Unassigned | Outlier                                   | Ref |
| MG945593 | Unassigned | Unassigned | Unassigned | Outlier                                   | Ref |
| MG945595 | Unassigned | Unassigned | Unassigned | Singleton                                 | Ref |
| MG945597 | Unassigned | Unassigned | Unassigned | Outlier                                   | Ref |
| MG945599 | Unassigned | Unassigned | Unassigned | Overlap (VC_1097/VC_1103)                 | Ref |
| MG945601 | Unassigned | Unassigned | Unassigned | Overlap (VC_1097/VC_1103/VC_1183)         | Ref |
| MG945603 | Unassigned | Unassigned | Unassigned | Overlap (VC_1097/VC_1103)                 | Ref |
| MG945604 | Unassigned | Unassigned | Unassigned | Singleton                                 | Ref |
| MG945606 | Unassigned | Unassigned | Unassigned | Outlier                                   | Ref |
| MG945607 | Unassigned | Unassigned | Unassigned | Overlap (VC_1173/VC_1177)                 | Ref |
| MG945608 | Unassigned | Unassigned | Unassigned | Singleton                                 | Ref |
| MG945610 | Unassigned | Unassigned | Unassigned | Singleton                                 | Ref |
| MG945613 | Unassigned | Unassigned | Unassigned | Overlap (VC_1159/VC_1162)                 | Ref |
| MG945622 | Unassigned | Unassigned | Unassigned | Overlap (VC_1311/VC_1313)                 | Ref |
| MG945626 | Unassigned | Unassigned | Unassigned | Outlier                                   | Ref |
| MG945630 | Unassigned | Unassigned | Unassigned | Singleton                                 | Ref |
| MG945636 | Unassigned | Unassigned | Unassigned | Singleton                                 | Ref |
| MG945638 | Unassigned | Unassigned | Unassigned | Singleton                                 | Ref |
| MG945666 | Unassigned | Unassigned | Unassigned | Outlier                                   | Ref |
| MG945675 | Unassigned | Unassigned | Unassigned | Outlier                                   | Ref |
| MG945677 | Unassigned | Unassigned | Unassigned | Outlier                                   | Ref |
| MG945679 | Unassigned | Unassigned | Unassigned | Overlap (VC_1095/VC_1096)                 | Ref |
| MG945684 | Unassigned | Unassigned | Unassigned | Overlap (VC_1174/VC_1343)                 | Ref |
| MG945688 | Unassigned | Unassigned | Unassigned | Outlier                                   | Ref |



|          |            |            |            |                                           |     |
|----------|------------|------------|------------|-------------------------------------------|-----|
| MC945695 | Unassigned | Unassigned | Unassigned | Singleton                                 | Ref |
| MC945701 | Unassigned | Unassigned | Unassigned | Overlap (VC_1095/VC_1096)                 | Ref |
| MC945704 | Unassigned | Unassigned | Unassigned | Overlap (VC_1160/VC_1164)                 | Ref |
| MC945709 | Unassigned | Unassigned | Unassigned | Singleton                                 | Ref |
| MC945711 | Unassigned | Unassigned | Unassigned | Overlap (VC_1096/VC_1100)                 | Ref |
| MC945714 | Unassigned | Unassigned | Unassigned | Singleton                                 | Ref |
| MC945720 | Unassigned | Unassigned | Unassigned | Overlap (VC_1176/VC_1366/VC_1381/VC_1382) | Ref |
| MC945722 | Unassigned | Unassigned | Unassigned | Outlier                                   | Ref |
| MC945732 | Unassigned | Unassigned | Unassigned | Overlap (VC_1311/VC_1312/VC_1313)         | Ref |
| MC945737 | Unassigned | Unassigned | Unassigned | Outlier                                   | Ref |
| MC945762 | Unassigned | Unassigned | Unassigned | Singleton                                 | Ref |
| MC945763 | Unassigned | Unassigned | Unassigned | Singleton                                 | Ref |
| MC945772 | Unassigned | Unassigned | Unassigned | Singleton                                 | Ref |
| MC945773 | Unassigned | Unassigned | Unassigned | Singleton                                 | Ref |
| MC945777 | Unassigned | Unassigned | Unassigned | Overlap (VC_1097/VC_1103/VC_1183)         | Ref |
| MC945779 | Unassigned | Unassigned | Unassigned | Singleton                                 | Ref |
| MC945830 | Unassigned | Unassigned | Unassigned | Overlap (VC_1311/VC_1313)                 | Ref |
| MC945833 | Unassigned | Unassigned | Unassigned | Singleton                                 | Ref |
| MC945834 | Unassigned | Unassigned | Unassigned | Overlap (VC_419/VC_1306)                  | Ref |
| MC945841 | Unassigned | Unassigned | Unassigned | Singleton                                 | Ref |
| MC945844 | Unassigned | Unassigned | Unassigned | Singleton                                 | Ref |
| MC945847 | Unassigned | Unassigned | Unassigned | Outlier                                   | Ref |
| MC945851 | Unassigned | Unassigned | Unassigned | Singleton                                 | Ref |
| MC945854 | Unassigned | Unassigned | Unassigned | Overlap (VC_1120/VC_1121)                 | Ref |
| MC945856 | Unassigned | Unassigned | Unassigned | Outlier                                   | Ref |
| MC945860 | Unassigned | Unassigned | Unassigned | Outlier                                   | Ref |
| MC945861 | Unassigned | Unassigned | Unassigned | Overlap (VC_1120/VC_1124)                 | Ref |
| MC945863 | Unassigned | Unassigned | Unassigned | Overlap (VC_1120/VC_1121)                 | Ref |
| MC945865 | Unassigned | Unassigned | Unassigned | Singleton                                 | Ref |
| MC945868 | Unassigned | Unassigned | Unassigned | Singleton                                 | Ref |
| MC948468 | Unassigned | Unassigned | Unassigned | Outlier                                   | Ref |
| MC962366 | Unassigned | Unassigned | Unassigned | Overlap (VC_577/VC_581/VC_582/VC_583)     | Ref |
| MC969407 | Unassigned | Unassigned | Unassigned | Outlier                                   | Ref |
| MC969413 | Unassigned | Unassigned | Unassigned | Outlier                                   | Ref |
| MC969414 | Unassigned | Unassigned | Unassigned | Outlier                                   | Ref |
| MC969427 | Unassigned | Unassigned | Unassigned | Outlier                                   | Ref |
| MC986485 | Unassigned | Unassigned | Unassigned | Outlier                                   | Ref |
| MC999954 | Unassigned | Unassigned | Unassigned | Overlap (VC_293/VC_297/VC_509)            | Ref |
| MH001449 | Unassigned | Unassigned | Unassigned | Outlier                                   | Ref |
| MH020242 | Unassigned | Unassigned | Unassigned | Overlap (VC_539/VC_570)                   | Ref |
| MH020243 | Unassigned | Unassigned | Unassigned | Overlap (VC_539/VC_570)                   | Ref |
| MH020245 | Unassigned | Unassigned | Unassigned | Overlap (VC_245/VC_247)                   | Ref |
| MH028956 | Unassigned | Unassigned | Unassigned | Outlier                                   | Ref |
| MH045555 | Unassigned | Unassigned | Unassigned | Overlap (VC_1297/VC_1298)                 | Ref |
| MH045556 | Unassigned | Unassigned | Unassigned | Outlier                                   | Ref |
| MH045559 | Unassigned | Unassigned | Unassigned | Overlap (VC_1297/VC_1298)                 | Ref |
| MH047631 | Unassigned | Unassigned | Unassigned | Outlier                                   | Ref |
| MH051248 | Unassigned | Unassigned | Unassigned | Overlap (VC_539/VC_569)                   | Ref |
| MH059633 | Unassigned | Unassigned | Unassigned | Overlap (VC_555/VC_637)                   | Ref |
| MH059634 | Unassigned | Unassigned | Unassigned | Outlier                                   | Ref |
| MH059637 | Unassigned | Unassigned | Unassigned | Outlier                                   | Ref |
| MH077585 | Unassigned | Unassigned | Unassigned | Outlier                                   | Ref |
| MH078572 | Unassigned | Unassigned | Unassigned | Outlier                                   | Ref |
| MH105080 | Unassigned | Unassigned | Unassigned | Singleton                                 | Ref |
| MH107246 | Unassigned | Unassigned | Unassigned | Overlap (VC_449/VC_675)                   | Ref |
| MH155867 | Unassigned | Unassigned | Unassigned | Overlap (VC_544/VC_574)                   | Ref |
| MH155869 | Unassigned | Unassigned | Unassigned | Overlap (VC_901/VC_902)                   | Ref |
| MH155872 | Unassigned | Unassigned | Unassigned | Overlap (VC_901/VC_902)                   | Ref |
| MH155878 | Unassigned | Unassigned | Unassigned | Overlap (VC_901/VC_902)                   | Ref |
| MH191395 | Unassigned | Unassigned | Unassigned | Overlap (VC_555/VC_637)                   | Ref |
| MH230879 | Unassigned | Unassigned | Unassigned | Outlier                                   | Ref |
| MH238466 | Unassigned | Unassigned | Unassigned | Outlier                                   | Ref |
| MH238467 | Unassigned | Unassigned | Unassigned | Outlier                                   | Ref |
| MH319722 | Unassigned | Unassigned | Unassigned | Singleton                                 | Ref |
| MH319723 | Unassigned | Unassigned | Unassigned | Outlier                                   | Ref |
| MH319724 | Unassigned | Unassigned | Unassigned | Outlier                                   | Ref |
| MH319725 | Unassigned | Unassigned | Unassigned | Singleton                                 | Ref |
| MH319732 | Unassigned | Unassigned | Unassigned | Outlier                                   | Ref |
| MH319734 | Unassigned | Unassigned | Unassigned | Overlap (VC_454/VC_678)                   | Ref |
| MH319738 | Unassigned | Unassigned | Unassigned | Outlier                                   | Ref |
| MH319741 | Unassigned | Unassigned | Unassigned | Outlier                                   | Ref |
| MH319743 | Unassigned | Unassigned | Unassigned | Outlier                                   | Ref |
| MH319745 | Unassigned | Unassigned | Unassigned | Outlier                                   | Ref |
| MH319751 | Unassigned | Unassigned | Unassigned | Overlap (VC_454/VC_678)                   | Ref |
| MH319752 | Unassigned | Unassigned | Unassigned | Outlier                                   | Ref |
| MH319755 | Unassigned | Unassigned | Unassigned | Overlap (VC_454/VC_678)                   | Ref |
| MH319760 | Unassigned | Unassigned | Unassigned | Singleton                                 | Ref |
| MH319764 | Unassigned | Unassigned | Unassigned | Outlier                                   | Ref |
| MH319765 | Unassigned | Unassigned | Unassigned | Outlier                                   | Ref |
| MH327485 | Unassigned | Unassigned | Unassigned | Outlier                                   | Ref |
| MH327486 | Unassigned | Unassigned | Unassigned | Outlier                                   | Ref |



|          |            |            |            |                                                  |     |
|----------|------------|------------|------------|--------------------------------------------------|-----|
| MH327490 | Unassigned | Unassigned | Unassigned | Outlier                                          | Ref |
| MH327491 | Unassigned | Unassigned | Unassigned | Outlier                                          | Ref |
| MH341453 | Unassigned | Unassigned | Unassigned | Overlap (VC_146/VC_317)                          | Ref |
| MH362766 | Unassigned | Unassigned | Unassigned | Overlap (VC_767/VC_768)                          | Ref |
| MH370364 | Unassigned | Unassigned | Unassigned | Outlier                                          | Ref |
| MH370382 | Unassigned | Unassigned | Unassigned | Outlier                                          | Ref |
| MH370383 | Unassigned | Unassigned | Unassigned | Outlier                                          | Ref |
| MH382836 | Unassigned | Unassigned | Unassigned | Outlier                                          | Ref |
| MH399770 | Unassigned | Unassigned | Unassigned | Overlap (VC_245/VC_247)                          | Ref |
| MH431930 | Unassigned | Unassigned | Unassigned | Outlier                                          | Ref |
| MH443101 | Unassigned | Unassigned | Unassigned | Overlap (VC_34/VC_35)                            | Ref |
| MH445500 | Unassigned | Unassigned | Unassigned | Outlier                                          | Ref |
| MH450123 | Unassigned | Unassigned | Unassigned | Overlap (VC_1073/VC_1074/VC_1078)                | Ref |
| MH454081 | Unassigned | Unassigned | Unassigned | Outlier                                          | Ref |
| MH458951 | Unassigned | Unassigned | Unassigned | Outlier                                          | Ref |
| MH479922 | Unassigned | Unassigned | Unassigned | Overlap (VC_1297/VC_1298)                        | Ref |
| MH509441 | Unassigned | Unassigned | Unassigned | Outlier                                          | Ref |
| MH509442 | Unassigned | Unassigned | Unassigned | Outlier                                          | Ref |
| MH517022 | Unassigned | Unassigned | Unassigned | Outlier                                          | Ref |
| MH518298 | Unassigned | Unassigned | Unassigned | Outlier                                          | Ref |
| MH536826 | Unassigned | Unassigned | Unassigned | Outlier                                          | Ref |
| MH538296 | Unassigned | Unassigned | Unassigned | Outlier                                          | Ref |
| MH553517 | Unassigned | Unassigned | Unassigned | Outlier                                          | Ref |
| MH572270 | Unassigned | Unassigned | Unassigned | Overlap (VC_207/VC_411)                          | Ref |
| MH572271 | Unassigned | Unassigned | Unassigned | Overlap (VC_419/VC_1306)                         | Ref |
| MH572272 | Unassigned | Unassigned | Unassigned | Overlap (VC_419/VC_1306)                         | Ref |
| MH572273 | Unassigned | Unassigned | Unassigned | Overlap (VC_419/VC_1306)                         | Ref |
| MH572278 | Unassigned | Unassigned | Unassigned | Outlier                                          | Ref |
| MH572281 | Unassigned | Unassigned | Unassigned | Overlap (VC_207/VC_412/VC_414)                   | Ref |
| MH572289 | Unassigned | Unassigned | Unassigned | Overlap (VC_419/VC_1032)                         | Ref |
| MH572297 | Unassigned | Unassigned | Unassigned | Overlap (VC_414/VC_1027/VC_1126)                 | Ref |
| MH572298 | Unassigned | Unassigned | Unassigned | Outlier                                          | Ref |
| MH572304 | Unassigned | Unassigned | Unassigned | Outlier                                          | Ref |
| MH572322 | Unassigned | Unassigned | Unassigned | Overlap (VC_207/VC_412)                          | Ref |
| MH572323 | Unassigned | Unassigned | Unassigned | Overlap (VC_207/VC_412)                          | Ref |
| MH572324 | Unassigned | Unassigned | Unassigned | Overlap (VC_207/VC_412)                          | Ref |
| MH572327 | Unassigned | Unassigned | Unassigned | Overlap (VC_207/VC_412)                          | Ref |
| MH572331 | Unassigned | Unassigned | Unassigned | Outlier                                          | Ref |
| MH572332 | Unassigned | Unassigned | Unassigned | Overlap (VC_207/VC_412)                          | Ref |
| MH572333 | Unassigned | Unassigned | Unassigned | Overlap (VC_411/VC_417)                          | Ref |
| MH572335 | Unassigned | Unassigned | Unassigned | Overlap (VC_207/VC_412)                          | Ref |
| MH572337 | Unassigned | Unassigned | Unassigned | Overlap (VC_207/VC_412)                          | Ref |
| MH572338 | Unassigned | Unassigned | Unassigned | Overlap (VC_414/VC_1027/VC_1126)                 | Ref |
| MH572339 | Unassigned | Unassigned | Unassigned | Outlier                                          | Ref |
| MH572344 | Unassigned | Unassigned | Unassigned | Outlier                                          | Ref |
| MH572346 | Unassigned | Unassigned | Unassigned | Outlier                                          | Ref |
| MH572350 | Unassigned | Unassigned | Unassigned | Overlap (VC_207/VC_412)                          | Ref |
| MH572352 | Unassigned | Unassigned | Unassigned | Singleton                                        | Ref |
| MH572356 | Unassigned | Unassigned | Unassigned | Outlier                                          | Ref |
| MH572359 | Unassigned | Unassigned | Unassigned | Outlier                                          | Ref |
| MH572363 | Unassigned | Unassigned | Unassigned | Outlier                                          | Ref |
| MH572365 | Unassigned | Unassigned | Unassigned | Singleton                                        | Ref |
| MH572370 | Unassigned | Unassigned | Unassigned | Overlap (VC_1108/VC_1398)                        | Ref |
| MH572372 | Unassigned | Unassigned | Unassigned | Singleton                                        | Ref |
| MH572381 | Unassigned | Unassigned | Unassigned | Outlier                                          | Ref |
| MH572398 | Unassigned | Unassigned | Unassigned | Outlier                                          | Ref |
| MH572413 | Unassigned | Unassigned | Unassigned | Overlap (VC_1121/VC_1123)                        | Ref |
| MH572415 | Unassigned | Unassigned | Unassigned | Overlap (VC_1388/VC_1398)                        | Ref |
| MH572416 | Unassigned | Unassigned | Unassigned | Overlap (VC_419/VC_1306)                         | Ref |
| MH572417 | Unassigned | Unassigned | Unassigned | Outlier                                          | Ref |
| MH572420 | Unassigned | Unassigned | Unassigned | Outlier                                          | Ref |
| MH572421 | Unassigned | Unassigned | Unassigned | Overlap (VC_207/VC_412)                          | Ref |
| MH572432 | Unassigned | Unassigned | Unassigned | Overlap (VC_414/VC_1027/VC_1032/VC_1126)         | Ref |
| MH572433 | Unassigned | Unassigned | Unassigned | Overlap (VC_210/VC_415)                          | Ref |
| MH572440 | Unassigned | Unassigned | Unassigned | Overlap (VC_207/VC_412)                          | Ref |
| MH572442 | Unassigned | Unassigned | Unassigned | Overlap (VC_412/VC_414/VC_1126)                  | Ref |
| MH572447 | Unassigned | Unassigned | Unassigned | Outlier                                          | Ref |
| MH572449 | Unassigned | Unassigned | Unassigned | Overlap (VC_414/VC_1027/VC_1031/VC_1035/VC_1126) | Ref |
| MH572450 | Unassigned | Unassigned | Unassigned | Overlap (VC_412/VC_414/VC_1126)                  | Ref |
| MH572456 | Unassigned | Unassigned | Unassigned | Singleton                                        | Ref |
| MH572464 | Unassigned | Unassigned | Unassigned | Overlap (VC_1108/VC_1398)                        | Ref |
| MH572474 | Unassigned | Unassigned | Unassigned | Overlap (VC_207/VC_412)                          | Ref |
| MH572476 | Unassigned | Unassigned | Unassigned | Overlap (VC_416/VC_419)                          | Ref |
| MH572477 | Unassigned | Unassigned | Unassigned | Overlap (VC_416/VC_419)                          | Ref |
| MH572478 | Unassigned | Unassigned | Unassigned | Overlap (VC_416/VC_419)                          | Ref |
| MH572481 | Unassigned | Unassigned | Unassigned | Outlier                                          | Ref |
| MH572488 | Unassigned | Unassigned | Unassigned | Outlier                                          | Ref |
| MH572501 | Unassigned | Unassigned | Unassigned | Overlap (VC_414/VC_1027/VC_1032/VC_1126)         | Ref |
| MH572502 | Unassigned | Unassigned | Unassigned | Outlier                                          | Ref |
| MH572523 | Unassigned | Unassigned | Unassigned | Overlap (VC_1388/VC_1398)                        | Ref |
| MH576973 | Unassigned | Unassigned | Unassigned | Overlap (VC_918/VC_919)                          | Ref |



|          |            |            |            |                                       |     |
|----------|------------|------------|------------|---------------------------------------|-----|
| MH588546 | Unassigned | Unassigned | Unassigned | Overlap (VC_1012/VC_1015)             | Ref |
| MH588547 | Unassigned | Unassigned | Unassigned | Overlap (VC_1012/VC_1015)             | Ref |
| MH590590 | Unassigned | Unassigned | Unassigned | Overlap (VC_1297/VC_1298)             | Ref |
| MH598799 | Unassigned | Unassigned | Unassigned | Overlap (VC_497/VC_498)               | Ref |
| MH626557 | Unassigned | Unassigned | Unassigned | Outlier                               | Ref |
| MH632120 | Unassigned | Unassigned | Unassigned | Outlier                               | Ref |
| MH636380 | Unassigned | Unassigned | Unassigned | Singleton                             | Ref |
| MH651173 | Unassigned | Unassigned | Unassigned | Overlap (VC_234/VC_975)               | Ref |
| MH651187 | Unassigned | Unassigned | Unassigned | Outlier                               | Ref |
| MH669005 | Unassigned | Unassigned | Unassigned | Overlap (VC_539/VC_568)               | Ref |
| MH669009 | Unassigned | Unassigned | Unassigned | Overlap (VC_539/VC_568)               | Ref |
| MH669010 | Unassigned | Unassigned | Unassigned | Overlap (VC_539/VC_568)               | Ref |
| MH673671 | Unassigned | Unassigned | Unassigned | Singleton                             | Ref |
| MH673672 | Unassigned | Unassigned | Unassigned | Outlier                               | Ref |
| MH673673 | Unassigned | Unassigned | Unassigned | Outlier                               | Ref |
| MH673674 | Unassigned | Unassigned | Unassigned | Outlier                               | Ref |
| MH697589 | Unassigned | Unassigned | Unassigned | Overlap (VC_1204/VC_1299)             | Ref |
| MH700630 | Unassigned | Unassigned | Unassigned | Outlier                               | Ref |
| MH706966 | Unassigned | Unassigned | Unassigned | Outlier                               | Ref |
| MH719082 | Unassigned | Unassigned | Unassigned | Outlier                               | Ref |
| MH727545 | Unassigned | Unassigned | Unassigned | Overlap (VC_243/VC_245)               | Ref |
| MH727550 | Unassigned | Unassigned | Unassigned | Outlier                               | Ref |
| MH727556 | Unassigned | Unassigned | Unassigned | Overlap (VC_1213/VC_1214)             | Ref |
| MH729379 | Unassigned | Unassigned | Unassigned | Outlier                               | Ref |
| MH744425 | Unassigned | Unassigned | Unassigned | Overlap (VC_917/VC_919)               | Ref |
| MH745368 | Unassigned | Unassigned | Unassigned | Outlier                               | Ref |
| MH766655 | Unassigned | Unassigned | Unassigned | Outlier                               | Ref |
| MH809532 | Unassigned | Unassigned | Unassigned | Overlap (VC_382/VC_506)               | Ref |
| MH809533 | Unassigned | Unassigned | Unassigned | Overlap (VC_382/VC_506)               | Ref |
| MH817999 | Unassigned | Unassigned | Unassigned | Overlap (VC_612/VC_617)               | Ref |
| MH825708 | Unassigned | Unassigned | Unassigned | Overlap (VC_234/VC_975)               | Ref |
| MH825712 | Unassigned | Unassigned | Unassigned | Outlier                               | Ref |
| MH830339 | Unassigned | Unassigned | Unassigned | Overlap (VC_202/VC_203)               | Ref |
| MH834601 | Unassigned | Unassigned | Unassigned | Overlap (VC_243/VC_245)               | Ref |
| MH845412 | Unassigned | Unassigned | Unassigned | Overlap (VC_603/VC_605)               | Ref |
| MH853355 | Unassigned | Unassigned | Unassigned | Overlap (VC_269/VC_327)               | Ref |
| MH853356 | Unassigned | Unassigned | Unassigned | Overlap (VC_301/VC_327)               | Ref |
| MH853357 | Unassigned | Unassigned | Unassigned | Overlap (VC_345/VC_429/VC_444/VC_799) | Ref |
| MH853358 | Unassigned | Unassigned | Unassigned | Overlap (VC_269/VC_327)               | Ref |
| MH884509 | Unassigned | Unassigned | Unassigned | Outlier                               | Ref |
| MH884510 | Unassigned | Unassigned | Unassigned | Outlier                               | Ref |
| MH884648 | Unassigned | Unassigned | Unassigned | Singleton                             | Ref |
| MH898687 | Unassigned | Unassigned | Unassigned | Overlap (VC_380/VC_382)               | Ref |
| MH920638 | Unassigned | Unassigned | Unassigned | Outlier                               | Ref |
| MH925093 | Unassigned | Unassigned | Unassigned | Overlap (VC_822/VC_1000)              | Ref |
| MH972261 | Unassigned | Unassigned | Unassigned | Overlap (VC_99/VC_101)                | Ref |
| MH972262 | Unassigned | Unassigned | Unassigned | Overlap (VC_99/VC_101)                | Ref |
| MH972263 | Unassigned | Unassigned | Unassigned | Overlap (VC_99/VC_101)                | Ref |
| MH992162 | Unassigned | Unassigned | Unassigned | Overlap (VC_1107/VC_1432)             | Ref |
| MH992166 | Unassigned | Unassigned | Unassigned | Outlier                               | Ref |
| MH992168 | Unassigned | Unassigned | Unassigned | Singleton                             | Ref |
| MH992172 | Unassigned | Unassigned | Unassigned | Overlap (VC_1107/VC_1432)             | Ref |
| MH992176 | Unassigned | Unassigned | Unassigned | Overlap (VC_1107/VC_1432)             | Ref |
| MH992179 | Unassigned | Unassigned | Unassigned | Overlap (VC_1107/VC_1432)             | Ref |
| MH992183 | Unassigned | Unassigned | Unassigned | Overlap (VC_338/VC_415)               | Ref |
| MH992186 | Unassigned | Unassigned | Unassigned | Singleton                             | Ref |
| MH992187 | Unassigned | Unassigned | Unassigned | Overlap (VC_1107/VC_1432)             | Ref |
| MH992188 | Unassigned | Unassigned | Unassigned | Overlap (VC_207/VC_412/VC_414)        | Ref |
| MH992190 | Unassigned | Unassigned | Unassigned | Overlap (VC_207/VC_415)               | Ref |
| MH992198 | Unassigned | Unassigned | Unassigned | Overlap (VC_1107/VC_1432)             | Ref |
| MH992201 | Unassigned | Unassigned | Unassigned | Outlier                               | Ref |
| MH992203 | Unassigned | Unassigned | Unassigned | Overlap (VC_209/VC_411/VC_415)        | Ref |
| MH992204 | Unassigned | Unassigned | Unassigned | Outlier                               | Ref |
| MH992209 | Unassigned | Unassigned | Unassigned | Overlap (VC_207/VC_415)               | Ref |
| MH992212 | Unassigned | Unassigned | Unassigned | Overlap (VC_419/VC_1306)              | Ref |
| MH992221 | Unassigned | Unassigned | Unassigned | Overlap (VC_1108/VC_1398)             | Ref |
| MH992223 | Unassigned | Unassigned | Unassigned | Outlier                               | Ref |
| MK016490 | Unassigned | Unassigned | Unassigned | Overlap (VC_762/VC_763)               | Ref |
| MK016493 | Unassigned | Unassigned | Unassigned | Outlier                               | Ref |
| MK016500 | Unassigned | Unassigned | Unassigned | Overlap (VC_762/VC_763)               | Ref |
| MK016663 | Unassigned | Unassigned | Unassigned | Outlier                               | Ref |
| MK044828 | Unassigned | Unassigned | Unassigned | Overlap (VC_262/VC_427)               | Ref |
| MK044829 | Unassigned | Unassigned | Unassigned | Outlier                               | Ref |
| MK061406 | Unassigned | Unassigned | Unassigned | Overlap (VC_544/VC_574)               | Ref |
| MK061416 | Unassigned | Unassigned | Unassigned | Outlier                               | Ref |
| MK069556 | Unassigned | Unassigned | Unassigned | Outlier                               | Ref |
| MK075005 | Unassigned | Unassigned | Unassigned | Outlier                               | Ref |
| MK095605 | Unassigned | Unassigned | Unassigned | Outlier                               | Ref |
| MK095606 | Unassigned | Unassigned | Unassigned | Outlier                               | Ref |
| MK170447 | Unassigned | Unassigned | Unassigned | Singleton                             | Ref |
| MK203850 | Unassigned | Unassigned | Unassigned | Outlier                               | Ref |



|          |            |            |            |                                   |     |
|----------|------------|------------|------------|-----------------------------------|-----|
| MK241539 | Unassigned | Unassigned | Unassigned | Outlier                           | Ref |
| MK249130 | Unassigned | Unassigned | Unassigned | Overlap (VC_1109/VC_1110)         | Ref |
| MK249134 | Unassigned | Unassigned | Unassigned | Overlap (VC_1028/VC_1106)         | Ref |
| MK249136 | Unassigned | Unassigned | Unassigned | Overlap (VC_1109/VC_1110)         | Ref |
| MK249137 | Unassigned | Unassigned | Unassigned | Overlap (VC_1109/VC_1110)         | Ref |
| MK249140 | Unassigned | Unassigned | Unassigned | Overlap (VC_1109/VC_1110)         | Ref |
| MK249142 | Unassigned | Unassigned | Unassigned | Overlap (VC_1109/VC_1110)         | Ref |
| MK249145 | Unassigned | Unassigned | Unassigned | Overlap (VC_1109/VC_1110)         | Ref |
| MK249146 | Unassigned | Unassigned | Unassigned | Overlap (VC_1097/VC_1103)         | Ref |
| MK249152 | Unassigned | Unassigned | Unassigned | Overlap (VC_1109/VC_1110)         | Ref |
| MK249157 | Unassigned | Unassigned | Unassigned | Outlier                           | Ref |
| MK249161 | Unassigned | Unassigned | Unassigned | Overlap (VC_1109/VC_1110)         | Ref |
| MK249164 | Unassigned | Unassigned | Unassigned | Overlap (VC_1109/VC_1110)         | Ref |
| MK249169 | Unassigned | Unassigned | Unassigned | Overlap (VC_1109/VC_1110)         | Ref |
| MK249170 | Unassigned | Unassigned | Unassigned | Overlap (VC_1109/VC_1110)         | Ref |
| MK249171 | Unassigned | Unassigned | Unassigned | Outlier                           | Ref |
| MK249172 | Unassigned | Unassigned | Unassigned | Overlap (VC_1031/VC_1033/VC_1035) | Ref |
| MK249173 | Unassigned | Unassigned | Unassigned | Overlap (VC_1028/VC_1029)         | Ref |
| MK249175 | Unassigned | Unassigned | Unassigned | Overlap (VC_1109/VC_1110)         | Ref |
| MK249177 | Unassigned | Unassigned | Unassigned | Overlap (VC_209/VC_411/VC_415)    | Ref |
| MK249182 | Unassigned | Unassigned | Unassigned | Overlap (VC_1031/VC_1035)         | Ref |
| MK249183 | Unassigned | Unassigned | Unassigned | Outlier                           | Ref |
| MK249184 | Unassigned | Unassigned | Unassigned | Overlap (VC_1109/VC_1110)         | Ref |
| MK249186 | Unassigned | Unassigned | Unassigned | Overlap (VC_1031/VC_1035)         | Ref |
| MK249187 | Unassigned | Unassigned | Unassigned | Overlap (VC_1031/VC_1035)         | Ref |
| MK249193 | Unassigned | Unassigned | Unassigned | Singleton                         | Ref |
| MK249200 | Unassigned | Unassigned | Unassigned | Overlap (VC_411/VC_417)           | Ref |
| MK249206 | Unassigned | Unassigned | Unassigned | Overlap (VC_1031/VC_1035)         | Ref |
| MK249209 | Unassigned | Unassigned | Unassigned | Outlier                           | Ref |
| MK249210 | Unassigned | Unassigned | Unassigned | Overlap (VC_1028/VC_1106)         | Ref |
| MK249220 | Unassigned | Unassigned | Unassigned | Outlier                           | Ref |
| MK249224 | Unassigned | Unassigned | Unassigned | Overlap (VC_209/VC_411)           | Ref |
| MK249225 | Unassigned | Unassigned | Unassigned | Outlier                           | Ref |
| MK249226 | Unassigned | Unassigned | Unassigned | Overlap (VC_414/VC_1027/VC_1126)  | Ref |
| MK249227 | Unassigned | Unassigned | Unassigned | Overlap (VC_209/VC_411)           | Ref |
| MK249230 | Unassigned | Unassigned | Unassigned | Overlap (VC_209/VC_411)           | Ref |
| MK249234 | Unassigned | Unassigned | Unassigned | Overlap (VC_1108/VC_1398)         | Ref |
| MK249871 | Unassigned | Unassigned | Unassigned | Outlier                           | Ref |
| MK279848 | Unassigned | Unassigned | Unassigned | Overlap (VC_544/VC_574)           | Ref |
| MK279899 | Unassigned | Unassigned | Unassigned | Overlap (VC_1074/VC_1078)         | Ref |
| MK279905 | Unassigned | Unassigned | Unassigned | Overlap (VC_917/VC_919)           | Ref |
| MK290739 | Unassigned | Unassigned | Unassigned | Outlier                           | Ref |
| MK291445 | Unassigned | Unassigned | Unassigned | Outlier                           | Ref |
| MK295205 | Unassigned | Unassigned | Unassigned | Outlier                           | Ref |
| MK301438 | Unassigned | Unassigned | Unassigned | Overlap (VC_211/VC_214)           | Ref |
| MK301439 | Unassigned | Unassigned | Unassigned | Overlap (VC_211/VC_215)           | Ref |
| MK301440 | Unassigned | Unassigned | Unassigned | Overlap (VC_211/VC_214)           | Ref |
| MK301441 | Unassigned | Unassigned | Unassigned | Overlap (VC_211/VC_214)           | Ref |
| MK301608 | Unassigned | Unassigned | Unassigned | Outlier                           | Ref |
| MK305886 | Unassigned | Unassigned | Unassigned | Overlap (VC_539/VC_568)           | Ref |
| MK310144 | Unassigned | Unassigned | Unassigned | Overlap (VC_917/VC_919)           | Ref |
| MK310226 | Unassigned | Unassigned | Unassigned | Outlier                           | Ref |
| MK327938 | Unassigned | Unassigned | Unassigned | Outlier                           | Ref |
| MK358448 | Unassigned | Unassigned | Unassigned | Overlap (VC_456/VC_457)           | Ref |
| MK368614 | Unassigned | Unassigned | Unassigned | Overlap (VC_456/VC_457)           | Ref |
| MK388859 | Unassigned | Unassigned | Unassigned | Overlap (VC_188/VC_191)           | Ref |
| MK411820 | Unassigned | Unassigned | Unassigned | Overlap (VC_767/VC_768)           | Ref |
| MK416008 | Unassigned | Unassigned | Unassigned | Overlap (VC_39/VC_62)             | Ref |
| MK416016 | Unassigned | Unassigned | Unassigned | Outlier                           | Ref |
| MK416021 | Unassigned | Unassigned | Unassigned | Outlier                           | Ref |
| MK422450 | Unassigned | Unassigned | Unassigned | Outlier                           | Ref |
| MK422452 | Unassigned | Unassigned | Unassigned | Outlier                           | Ref |
| MK433264 | Unassigned | Unassigned | Unassigned | Overlap (VC_1138/VC_1139)         | Ref |
| MK433583 | Unassigned | Unassigned | Unassigned | Outlier                           | Ref |
| MK448228 | Unassigned | Unassigned | Unassigned | Outlier                           | Ref |
| MK448232 | Unassigned | Unassigned | Unassigned | Overlap (VC_61/VC_253)            | Ref |
| MK448236 | Unassigned | Unassigned | Unassigned | Outlier                           | Ref |
| MK448665 | Unassigned | Unassigned | Unassigned | Outlier                           | Ref |
| MK448666 | Unassigned | Unassigned | Unassigned | Overlap (VC_648/VC_649)           | Ref |
| MK448668 | Unassigned | Unassigned | Unassigned | Overlap (VC_648/VC_649)           | Ref |
| MK448669 | Unassigned | Unassigned | Unassigned | Overlap (VC_262/VC_427)           | Ref |
| MK448670 | Unassigned | Unassigned | Unassigned | Overlap (VC_648/VC_649)           | Ref |
| MK448677 | Unassigned | Unassigned | Unassigned | Overlap (VC_332/VC_557)           | Ref |
| MK448679 | Unassigned | Unassigned | Unassigned | Overlap (VC_332/VC_557)           | Ref |
| MK448682 | Unassigned | Unassigned | Unassigned | Overlap (VC_332/VC_557)           | Ref |
| MK448685 | Unassigned | Unassigned | Unassigned | Overlap (VC_269/VC_328)           | Ref |
| MK448687 | Unassigned | Unassigned | Unassigned | Overlap (VC_648/VC_649)           | Ref |
| MK448691 | Unassigned | Unassigned | Unassigned | Overlap (VC_446/VC_796)           | Ref |
| MK448695 | Unassigned | Unassigned | Unassigned | Overlap (VC_648/VC_649)           | Ref |
| MK448701 | Unassigned | Unassigned | Unassigned | Overlap (VC_269/VC_329)           | Ref |
| MK448703 | Unassigned | Unassigned | Unassigned | Overlap (VC_332/VC_347/VC_652)    | Ref |



|          |            |            |            |                                       |     |
|----------|------------|------------|------------|---------------------------------------|-----|
| MK448705 | Unassigned | Unassigned | Unassigned | Overlap (VC_445/VC_653/VC_758)        | Ref |
| MK448712 | Unassigned | Unassigned | Unassigned | Overlap (VC_260/VC_264)               | Ref |
| MK448713 | Unassigned | Unassigned | Unassigned | Overlap (VC_648/VC_649)               | Ref |
| MK448715 | Unassigned | Unassigned | Unassigned | Overlap (VC_262/VC_427)               | Ref |
| MK448717 | Unassigned | Unassigned | Unassigned | Overlap (VC_648/VC_649)               | Ref |
| MK448718 | Unassigned | Unassigned | Unassigned | Outlier                               | Ref |
| MK448719 | Unassigned | Unassigned | Unassigned | Overlap (VC_648/VC_649)               | Ref |
| MK448722 | Unassigned | Unassigned | Unassigned | Overlap (VC_648/VC_649)               | Ref |
| MK448723 | Unassigned | Unassigned | Unassigned | Overlap (VC_326/VC_654)               | Ref |
| MK448726 | Unassigned | Unassigned | Unassigned | Overlap (VC_648/VC_649)               | Ref |
| MK448727 | Unassigned | Unassigned | Unassigned | Outlier                               | Ref |
| MK448728 | Unassigned | Unassigned | Unassigned | Overlap (VC_648/VC_649)               | Ref |
| MK448729 | Unassigned | Unassigned | Unassigned | Overlap (VC_446/VC_796)               | Ref |
| MK448731 | Unassigned | Unassigned | Unassigned | Overlap (VC_345/VC_429/VC_444/VC_799) | Ref |
| MK448734 | Unassigned | Unassigned | Unassigned | Overlap (VC_345/VC_429/VC_444)        | Ref |
| MK448736 | Unassigned | Unassigned | Unassigned | Overlap (VC_269/VC_327)               | Ref |
| MK448737 | Unassigned | Unassigned | Unassigned | Outlier                               | Ref |
| MK448738 | Unassigned | Unassigned | Unassigned | Outlier                               | Ref |
| MK448742 | Unassigned | Unassigned | Unassigned | Overlap (VC_269/VC_327)               | Ref |
| MK448746 | Unassigned | Unassigned | Unassigned | Overlap (VC_326/VC_654)               | Ref |
| MK448747 | Unassigned | Unassigned | Unassigned | Overlap (VC_260/VC_265)               | Ref |
| MK448748 | Unassigned | Unassigned | Unassigned | Overlap (VC_260/VC_265)               | Ref |
| MK448749 | Unassigned | Unassigned | Unassigned | Overlap (VC_301/VC_327)               | Ref |
| MK448751 | Unassigned | Unassigned | Unassigned | Overlap (VC_260/VC_265)               | Ref |
| MK448753 | Unassigned | Unassigned | Unassigned | Overlap (VC_326/VC_654)               | Ref |
| MK448754 | Unassigned | Unassigned | Unassigned | Overlap (VC_429/VC_444/VC_1020)       | Ref |
| MK448755 | Unassigned | Unassigned | Unassigned | Overlap (VC_269/VC_327/VC_331)        | Ref |
| MK448756 | Unassigned | Unassigned | Unassigned | Overlap (VC_269/VC_327/VC_331)        | Ref |
| MK448760 | Unassigned | Unassigned | Unassigned | Overlap (VC_301/VC_398)               | Ref |
| MK448761 | Unassigned | Unassigned | Unassigned | Overlap (VC_301/VC_398)               | Ref |
| MK448763 | Unassigned | Unassigned | Unassigned | Overlap (VC_269/VC_328)               | Ref |
| MK448764 | Unassigned | Unassigned | Unassigned | Overlap (VC_429/VC_444/VC_799)        | Ref |
| MK448767 | Unassigned | Unassigned | Unassigned | Overlap (VC_269/VC_328)               | Ref |
| MK448768 | Unassigned | Unassigned | Unassigned | Overlap (VC_446/VC_796)               | Ref |
| MK448770 | Unassigned | Unassigned | Unassigned | Overlap (VC_332/VC_557)               | Ref |
| MK448771 | Unassigned | Unassigned | Unassigned | Overlap (VC_269/VC_328)               | Ref |
| MK448773 | Unassigned | Unassigned | Unassigned | Overlap (VC_269/VC_328)               | Ref |
| MK448774 | Unassigned | Unassigned | Unassigned | Overlap (VC_269/VC_328)               | Ref |
| MK448776 | Unassigned | Unassigned | Unassigned | Overlap (VC_648/VC_649)               | Ref |
| MK448777 | Unassigned | Unassigned | Unassigned | Overlap (VC_269/VC_328)               | Ref |
| MK448780 | Unassigned | Unassigned | Unassigned | Overlap (VC_648/VC_649)               | Ref |
| MK448781 | Unassigned | Unassigned | Unassigned | Overlap (VC_269/VC_327)               | Ref |
| MK448785 | Unassigned | Unassigned | Unassigned | Overlap (VC_332/VC_557)               | Ref |
| MK448786 | Unassigned | Unassigned | Unassigned | Overlap (VC_269/VC_328)               | Ref |
| MK448787 | Unassigned | Unassigned | Unassigned | Overlap (VC_648/VC_649)               | Ref |
| MK448792 | Unassigned | Unassigned | Unassigned | Overlap (VC_332/VC_557)               | Ref |
| MK448796 | Unassigned | Unassigned | Unassigned | Outlier                               | Ref |
| MK448799 | Unassigned | Unassigned | Unassigned | Overlap (VC_262/VC_283)               | Ref |
| MK448800 | Unassigned | Unassigned | Unassigned | Overlap (VC_262/VC_283)               | Ref |
| MK448801 | Unassigned | Unassigned | Unassigned | Overlap (VC_301/VC_396)               | Ref |
| MK448802 | Unassigned | Unassigned | Unassigned | Overlap (VC_648/VC_649)               | Ref |
| MK448803 | Unassigned | Unassigned | Unassigned | Overlap (VC_269/VC_325)               | Ref |
| MK448806 | Unassigned | Unassigned | Unassigned | Overlap (VC_332/VC_347/VC_815)        | Ref |
| MK448809 | Unassigned | Unassigned | Unassigned | Overlap (VC_648/VC_649)               | Ref |
| MK448810 | Unassigned | Unassigned | Unassigned | Overlap (VC_265/VC_325/VC_330)        | Ref |
| MK448812 | Unassigned | Unassigned | Unassigned | Overlap (VC_332/VC_347/VC_815)        | Ref |
| MK448813 | Unassigned | Unassigned | Unassigned | Overlap (VC_325/VC_812)               | Ref |
| MK448816 | Unassigned | Unassigned | Unassigned | Overlap (VC_269/VC_325)               | Ref |
| MK448817 | Unassigned | Unassigned | Unassigned | Outlier                               | Ref |
| MK448823 | Unassigned | Unassigned | Unassigned | Overlap (VC_265/VC_330/VC_640)        | Ref |
| MK448825 | Unassigned | Unassigned | Unassigned | Overlap (VC_648/VC_649)               | Ref |
| MK448826 | Unassigned | Unassigned | Unassigned | Overlap (VC_427/VC_813)               | Ref |
| MK448827 | Unassigned | Unassigned | Unassigned | Overlap (VC_648/VC_649)               | Ref |
| MK448829 | Unassigned | Unassigned | Unassigned | Overlap (VC_269/VC_327)               | Ref |
| MK448835 | Unassigned | Unassigned | Unassigned | Overlap (VC_648/VC_649)               | Ref |
| MK448836 | Unassigned | Unassigned | Unassigned | Overlap (VC_648/VC_649)               | Ref |
| MK448837 | Unassigned | Unassigned | Unassigned | Overlap (VC_269/VC_327)               | Ref |



|          |            |            |            |                                       |     |
|----------|------------|------------|------------|---------------------------------------|-----|
| MK448865 | Unassigned | Unassigned | Unassigned | Overlap (VC_269/VC_329)               | Ref |
| MK448869 | Unassigned | Unassigned | Unassigned | Overlap (VC_269/VC_329)               | Ref |
| MK448870 | Unassigned | Unassigned | Unassigned | Overlap (VC_269/VC_329)               | Ref |
| MK448872 | Unassigned | Unassigned | Unassigned | Overlap (VC_648/VC_649)               | Ref |
| MK448873 | Unassigned | Unassigned | Unassigned | Overlap (VC_445/VC_653/VC_758)        | Ref |
| MK448876 | Unassigned | Unassigned | Unassigned | Overlap (VC_332/VC_347/VC_652)        | Ref |
| MK448878 | Unassigned | Unassigned | Unassigned | Outlier                               | Ref |
| MK448879 | Unassigned | Unassigned | Unassigned | Outlier                               | Ref |
| MK448880 | Unassigned | Unassigned | Unassigned | Overlap (VC_260/VC_264)               | Ref |
| MK448883 | Unassigned | Unassigned | Unassigned | Overlap (VC_648/VC_649)               | Ref |
| MK448884 | Unassigned | Unassigned | Unassigned | Outlier                               | Ref |
| MK448885 | Unassigned | Unassigned | Unassigned | Outlier                               | Ref |
| MK448888 | Unassigned | Unassigned | Unassigned | Overlap (VC_345/VC_429/VC_444/VC_799) | Ref |
| MK448890 | Unassigned | Unassigned | Unassigned | Overlap (VC_265/VC_330)               | Ref |
| MK448891 | Unassigned | Unassigned | Unassigned | Outlier                               | Ref |
| MK448892 | Unassigned | Unassigned | Unassigned | Overlap (VC_262/VC_427)               | Ref |
| MK448899 | Unassigned | Unassigned | Unassigned | Outlier                               | Ref |
| MK448902 | Unassigned | Unassigned | Unassigned | Outlier                               | Ref |
| MK448906 | Unassigned | Unassigned | Unassigned | Overlap (VC_648/VC_649)               | Ref |
| MK448907 | Unassigned | Unassigned | Unassigned | Overlap (VC_648/VC_649)               | Ref |
| MK448908 | Unassigned | Unassigned | Unassigned | Outlier                               | Ref |
| MK448910 | Unassigned | Unassigned | Unassigned | Overlap (VC_147/VC_148)               | Ref |
| MK448911 | Unassigned | Unassigned | Unassigned | Overlap (VC_269/VC_327)               | Ref |
| MK448913 | Unassigned | Unassigned | Unassigned | Overlap (VC_648/VC_649)               | Ref |
| MK448916 | Unassigned | Unassigned | Unassigned | Overlap (VC_269/VC_327)               | Ref |
| MK448922 | Unassigned | Unassigned | Unassigned | Overlap (VC_648/VC_649)               | Ref |
| MK448924 | Unassigned | Unassigned | Unassigned | Overlap (VC_326/VC_654)               | Ref |
| MK448926 | Unassigned | Unassigned | Unassigned | Overlap (VC_260/VC_265)               | Ref |
| MK448928 | Unassigned | Unassigned | Unassigned | Overlap (VC_648/VC_649)               | Ref |
| MK448929 | Unassigned | Unassigned | Unassigned | Overlap (VC_429/VC_444/VC_1020)       | Ref |
| MK448930 | Unassigned | Unassigned | Unassigned | Overlap (VC_265/VC_330)               | Ref |
| MK448932 | Unassigned | Unassigned | Unassigned | Overlap (VC_262/VC_427)               | Ref |
| MK448935 | Unassigned | Unassigned | Unassigned | Overlap (VC_648/VC_649)               | Ref |
| MK448936 | Unassigned | Unassigned | Unassigned | Overlap (VC_648/VC_649)               | Ref |
| MK448937 | Unassigned | Unassigned | Unassigned | Outlier                               | Ref |
| MK448938 | Unassigned | Unassigned | Unassigned | Overlap (VC_269/VC_327)               | Ref |
| MK448940 | Unassigned | Unassigned | Unassigned | Overlap (VC_262/VC_427)               | Ref |
| MK448942 | Unassigned | Unassigned | Unassigned | Overlap (VC_269/VC_328)               | Ref |
| MK448943 | Unassigned | Unassigned | Unassigned | Overlap (VC_269/VC_328)               | Ref |
| MK448948 | Unassigned | Unassigned | Unassigned | Overlap (VC_446/VC_796)               | Ref |
| MK448956 | Unassigned | Unassigned | Unassigned | Overlap (VC_327/VC_332)               | Ref |
| MK448963 | Unassigned | Unassigned | Unassigned | Overlap (VC_269/VC_328)               | Ref |
| MK448964 | Unassigned | Unassigned | Unassigned | Overlap (VC_269/VC_328)               | Ref |
| MK448969 | Unassigned | Unassigned | Unassigned | Overlap (VC_269/VC_328)               | Ref |
| MK448971 | Unassigned | Unassigned | Unassigned | Overlap (VC_327/VC_332)               | Ref |
| MK448972 | Unassigned | Unassigned | Unassigned | Overlap (VC_269/VC_328)               | Ref |
| MK448978 | Unassigned | Unassigned | Unassigned | Overlap (VC_332/VC_557)               | Ref |
| MK448979 | Unassigned | Unassigned | Unassigned | Overlap (VC_262/VC_283)               | Ref |
| MK448980 | Unassigned | Unassigned | Unassigned | Outlier                               | Ref |
| MK448981 | Unassigned | Unassigned | Unassigned | Overlap (VC_269/VC_325)               | Ref |
| MK448982 | Unassigned | Unassigned | Unassigned | Overlap (VC_325/VC_427)               | Ref |
| MK448984 | Unassigned | Unassigned | Unassigned | Overlap (VC_269/VC_325)               | Ref |
| MK448985 | Unassigned | Unassigned | Unassigned | Overlap (VC_269/VC_325)               | Ref |
| MK448986 | Unassigned | Unassigned | Unassigned | Outlier                               | Ref |
| MK448987 | Unassigned | Unassigned | Unassigned | Outlier                               | Ref |
| MK448990 | Unassigned | Unassigned | Unassigned | Overlap (VC_332/VC_347/VC_815)        | Ref |
| MK448992 | Unassigned | Unassigned | Unassigned | Overlap (VC_345/VC_429/VC_444/VC_799) | Ref |
| MK448993 | Unassigned | Unassigned | Unassigned | Outlier                               | Ref |
| MK448994 | Unassigned | Unassigned | Unassigned | Overlap (VC_648/VC_649)               | Ref |
| MK448996 | Unassigned | Unassigned | Unassigned | Overlap (VC_265/VC_330/VC_640)        | Ref |
| MK448998 | Unassigned | Unassigned | Unassigned | Outlier                               | Ref |
| MK448999 | Unassigned | Unassigned | Unassigned | Overlap (VC_648/VC_649)               | Ref |
| MK449001 | Unassigned | Unassigned | Unassigned | Overlap (VC_427/VC_813)               | Ref |
| MK449005 | Unassigned | Unassigned | Unassigned | Outlier                               | Ref |
| MK449007 | Unassigned | Unassigned | Unassigned | Overlap (VC_648/VC_649)               | Ref |
| MK449011 | Unassigned | Unassigned | Unassigned | Overlap (VC_648/VC_649)               | Ref |
| MK449012 | Unassigned | Unassigned | Unassigned | Overlap (VC_269/VC_328)               | Ref |
| MK493321 | Unassigned | Unassigned | Unassigned | Overlap (VC_449/VC_675)               | Ref |
| MK493322 | Unassigned | Unassigned | Unassigned | Overlap (VC_449/VC_675)               | Ref |
| MK493323 | Unassigned | Unassigned | Unassigned | Overlap (VC_449/VC_675)               | Ref |
| MK493324 | Unassigned | Unassigned | Unassigned | Overlap (VC_449/VC_675)               | Ref |
| MK493325 | Unassigned | Unassigned | Unassigned | Overlap (VC_449/VC_675)               | Ref |
| MK494092 | Unassigned | Unassigned | Unassigned | Overlap (VC_917/VC_919)               | Ref |
| MK494100 | Unassigned | Unassigned | Unassigned | Overlap (VC_917/VC_919)               | Ref |
| MK494120 | Unassigned | Unassigned | Unassigned | Overlap (VC_539/VC_570)               | Ref |
| MK496684 | Unassigned | Unassigned | Unassigned | Singleton                             | Ref |
| MK496687 | Unassigned | Unassigned | Unassigned | Singleton                             | Ref |
| MK496691 | Unassigned | Unassigned | Unassigned | Outlier                               | Ref |
| MK496695 | Unassigned | Unassigned | Unassigned | Singleton                             | Ref |
| MK496703 | Unassigned | Unassigned | Unassigned | Outlier                               | Ref |
| MK496705 | Unassigned | Unassigned | Unassigned | Singleton                             | Ref |



|          |            |            |            |                                   |     |
|----------|------------|------------|------------|-----------------------------------|-----|
| MK496706 | Unassigned | Unassigned | Unassigned | Outlier                           | Ref |
| MK496707 | Unassigned | Unassigned | Unassigned | Overlap (VC_1438/VC_1439)         | Ref |
| MK496708 | Unassigned | Unassigned | Unassigned | Singleton                         | Ref |
| MK496709 | Unassigned | Unassigned | Unassigned | Singleton                         | Ref |
| MK496713 | Unassigned | Unassigned | Unassigned | Singleton                         | Ref |
| MK496715 | Unassigned | Unassigned | Unassigned | Overlap (VC_1328/VC_1329)         | Ref |
| MK496718 | Unassigned | Unassigned | Unassigned | Singleton                         | Ref |
| MK496722 | Unassigned | Unassigned | Unassigned | Outlier                           | Ref |
| MK496724 | Unassigned | Unassigned | Unassigned | Outlier                           | Ref |
| MK496727 | Unassigned | Unassigned | Unassigned | Singleton                         | Ref |
| MK496728 | Unassigned | Unassigned | Unassigned | Outlier                           | Ref |
| MK496730 | Unassigned | Unassigned | Unassigned | Singleton                         | Ref |
| MK496731 | Unassigned | Unassigned | Unassigned | Outlier                           | Ref |
| MK496733 | Unassigned | Unassigned | Unassigned | Overlap (VC_1095/VC_1099)         | Ref |
| MK496734 | Unassigned | Unassigned | Unassigned | Outlier                           | Ref |
| MK496735 | Unassigned | Unassigned | Unassigned | Overlap (VC_1174/VC_1343)         | Ref |
| MK496736 | Unassigned | Unassigned | Unassigned | Singleton                         | Ref |
| MK496737 | Unassigned | Unassigned | Unassigned | Outlier                           | Ref |
| MK496739 | Unassigned | Unassigned | Unassigned | Overlap (VC_1095/VC_1099)         | Ref |
| MK496740 | Unassigned | Unassigned | Unassigned | Outlier                           | Ref |
| MK496741 | Unassigned | Unassigned | Unassigned | Overlap (VC_1169/VC_1173/VC_1177) | Ref |
| MK496742 | Unassigned | Unassigned | Unassigned | Overlap (VC_1095/VC_1096)         | Ref |
| MK496743 | Unassigned | Unassigned | Unassigned | Outlier                           | Ref |
| MK496744 | Unassigned | Unassigned | Unassigned | Outlier                           | Ref |
| MK496747 | Unassigned | Unassigned | Unassigned | Outlier                           | Ref |
| MK496749 | Unassigned | Unassigned | Unassigned | Singleton                         | Ref |
| MK496752 | Unassigned | Unassigned | Unassigned | Overlap (VC_1109/VC_1110)         | Ref |
| MK496755 | Unassigned | Unassigned | Unassigned | Singleton                         | Ref |
| MK496759 | Unassigned | Unassigned | Unassigned | Singleton                         | Ref |
| MK496762 | Unassigned | Unassigned | Unassigned | Singleton                         | Ref |
| MK496763 | Unassigned | Unassigned | Unassigned | Outlier                           | Ref |
| MK496769 | Unassigned | Unassigned | Unassigned | Singleton                         | Ref |
| MK496773 | Unassigned | Unassigned | Unassigned | Singleton                         | Ref |
| MK496777 | Unassigned | Unassigned | Unassigned | Singleton                         | Ref |
| MK496778 | Unassigned | Unassigned | Unassigned | Overlap (VC_1173/VC_1177)         | Ref |
| MK496783 | Unassigned | Unassigned | Unassigned | Singleton                         | Ref |
| MK496788 | Unassigned | Unassigned | Unassigned | Overlap (VC_1169/VC_1173/VC_1177) | Ref |
| MK496789 | Unassigned | Unassigned | Unassigned | Overlap (VC_1328/VC_1329)         | Ref |
| MK496791 | Unassigned | Unassigned | Unassigned | Singleton                         | Ref |
| MK496793 | Unassigned | Unassigned | Unassigned | Outlier                           | Ref |
| MK496794 | Unassigned | Unassigned | Unassigned | Singleton                         | Ref |
| MK496795 | Unassigned | Unassigned | Unassigned | Outlier                           | Ref |
| MK496797 | Unassigned | Unassigned | Unassigned | Overlap (VC_1169/VC_1173/VC_1177) | Ref |
| MK496798 | Unassigned | Unassigned | Unassigned | Outlier                           | Ref |
| MK496799 | Unassigned | Unassigned | Unassigned | Outlier                           | Ref |
| MK496800 | Unassigned | Unassigned | Unassigned | Singleton                         | Ref |
| MK496801 | Unassigned | Unassigned | Unassigned | Outlier                           | Ref |
| MK496802 | Unassigned | Unassigned | Unassigned | Outlier                           | Ref |
| MK496805 | Unassigned | Unassigned | Unassigned | Overlap (VC_1159/VC_1162)         | Ref |
| MK496806 | Unassigned | Unassigned | Unassigned | Overlap (VC_1176/VC_1366)         | Ref |
| MK496807 | Unassigned | Unassigned | Unassigned | Outlier                           | Ref |
| MK496809 | Unassigned | Unassigned | Unassigned | Outlier                           | Ref |
| MK496810 | Unassigned | Unassigned | Unassigned | Outlier                           | Ref |
| MK496817 | Unassigned | Unassigned | Unassigned | Singleton                         | Ref |
| MK496819 | Unassigned | Unassigned | Unassigned | Singleton                         | Ref |
| MK496821 | Unassigned | Unassigned | Unassigned | Outlier                           | Ref |
| MK496822 | Unassigned | Unassigned | Unassigned | Overlap (VC_1029/VC_1107)         | Ref |
| MK496823 | Unassigned | Unassigned | Unassigned | Overlap (VC_1029/VC_1107)         | Ref |
| MK496826 | Unassigned | Unassigned | Unassigned | Outlier                           | Ref |
| MK504445 | Unassigned | Unassigned | Unassigned | Outlier                           | Ref |
| MK524492 | Unassigned | Unassigned | Unassigned | Overlap (VC_234/VC_975)           | Ref |
| MK533143 | Unassigned | Unassigned | Unassigned | Outlier                           | Ref |
| MK552105 | Unassigned | Unassigned | Unassigned | Outlier                           | Ref |
| MK554696 | Unassigned | Unassigned | Unassigned | Singleton                         | Ref |
| MK557849 | Unassigned | Unassigned | Unassigned | Singleton                         | Ref |
| MK560763 | Unassigned | Unassigned | Unassigned | Outlier                           | Ref |
| MK570056 | Unassigned | Unassigned | Unassigned | Singleton                         | Ref |
| MK570057 | Unassigned | Unassigned | Unassigned | Outlier                           | Ref |
| MK575466 | Unassigned | Unassigned | Unassigned | Overlap (VC_131/VC_729)           | Ref |
| MK613347 | Unassigned | Unassigned | Unassigned | Outlier                           | Ref |
| MK613348 | Unassigned | Unassigned | Unassigned | Outlier                           | Ref |
| MK613349 | Unassigned | Unassigned | Unassigned | Outlier                           | Ref |
| MK618717 | Unassigned | Unassigned | Unassigned | Overlap (VC_83/VC_637)            | Ref |
| MK620899 | Unassigned | Unassigned | Unassigned | Overlap (VC_1141/VC_1142)         | Ref |
| MK629525 | Unassigned | Unassigned | Unassigned | Outlier                           | Ref |
| MK629526 | Unassigned | Unassigned | Unassigned | Outlier                           | Ref |
| MK629529 | Unassigned | Unassigned | Unassigned | Outlier                           | Ref |
| MK660713 | Unassigned | Unassigned | Unassigned | Outlier                           | Ref |
| MK672802 | Unassigned | Unassigned | Unassigned | Overlap (VC_129/VC_811)           | Ref |
| MK672805 | Unassigned | Unassigned | Unassigned | Overlap (VC_129/VC_811)           | Ref |



|          |            |            |            |                                   |     |
|----------|------------|------------|------------|-----------------------------------|-----|
| MK675901 | Unassigned | Unassigned | Unassigned | Outlier                           | Ref |
| MK686070 | Unassigned | Unassigned | Unassigned | Overlap (VC_901/VC_902)           | Ref |
| MK686072 | Unassigned | Unassigned | Unassigned | Overlap (VC_901/VC_902)           | Ref |
| MK765554 | Unassigned | Unassigned | Unassigned | Overlap (VC_1345/VC_1346)         | Ref |
| MK765566 | Unassigned | Unassigned | Unassigned | Overlap (VC_1345/VC_1346)         | Ref |
| MK765570 | Unassigned | Unassigned | Unassigned | Singleton                         | Ref |
| MK765584 | Unassigned | Unassigned | Unassigned | Singleton                         | Ref |
| MK765585 | Unassigned | Unassigned | Unassigned | Outlier                           | Ref |
| MK765586 | Unassigned | Unassigned | Unassigned | Overlap (VC_1345/VC_1346)         | Ref |
| MK765595 | Unassigned | Unassigned | Unassigned | Overlap (VC_1468/VC_1470)         | Ref |
| MK765597 | Unassigned | Unassigned | Unassigned | Overlap (VC_1345/VC_1346)         | Ref |
| MK765608 | Unassigned | Unassigned | Unassigned | Singleton                         | Ref |
| MK765614 | Unassigned | Unassigned | Unassigned | Overlap (VC_1345/VC_1346)         | Ref |
| MK765616 | Unassigned | Unassigned | Unassigned | Overlap (VC_1345/VC_1346)         | Ref |
| MK765618 | Unassigned | Unassigned | Unassigned | Overlap (VC_1345/VC_1346)         | Ref |
| MK765619 | Unassigned | Unassigned | Unassigned | Outlier                           | Ref |
| MK765624 | Unassigned | Unassigned | Unassigned | Overlap (VC_1468/VC_1470)         | Ref |
| MK765627 | Unassigned | Unassigned | Unassigned | Overlap (VC_1468/VC_1470)         | Ref |
| MK765629 | Unassigned | Unassigned | Unassigned | Overlap (VC_1468/VC_1470)         | Ref |
| MK765632 | Unassigned | Unassigned | Unassigned | Outlier                           | Ref |
| MK765635 | Unassigned | Unassigned | Unassigned | Outlier                           | Ref |
| MK765636 | Unassigned | Unassigned | Unassigned | Overlap (VC_1345/VC_1346)         | Ref |
| MK765637 | Unassigned | Unassigned | Unassigned | Overlap (VC_1345/VC_1346)         | Ref |
| MK765647 | Unassigned | Unassigned | Unassigned | Overlap (VC_1345/VC_1346)         | Ref |
| MK765652 | Unassigned | Unassigned | Unassigned | Overlap (VC_1345/VC_1346)         | Ref |
| MK765665 | Unassigned | Unassigned | Unassigned | Overlap (VC_1345/VC_1346)         | Ref |
| MK770119 | Unassigned | Unassigned | Unassigned | Outlier                           | Ref |
| MK791318 | Unassigned | Unassigned | Unassigned | Outlier                           | Ref |
| MK801723 | Unassigned | Unassigned | Unassigned | Overlap (VC_984/VC_985)           | Ref |
| MK801729 | Unassigned | Unassigned | Unassigned | Overlap (VC_544/VC_574)           | Ref |
| MK813942 | Unassigned | Unassigned | Unassigned | Outlier                           | Ref |
| MK813943 | Unassigned | Unassigned | Unassigned | Overlap (VC_621/VC_837)           | Ref |
| MK838112 | Unassigned | Unassigned | Unassigned | Overlap (VC_621/VC_837)           | Ref |
| MK838114 | Unassigned | Unassigned | Unassigned | Overlap (VC_621/VC_837)           | Ref |
| MK838115 | Unassigned | Unassigned | Unassigned | Overlap (VC_621/VC_837)           | Ref |
| MK843319 | Unassigned | Unassigned | Unassigned | Overlap (VC_673/VC_764)           | Ref |
| MK875792 | Unassigned | Unassigned | Unassigned | Overlap (VC_539/VC_568)           | Ref |
| MK875794 | Unassigned | Unassigned | Unassigned | Overlap (VC_1204/VC_1299)         | Ref |
| MK878902 | Unassigned | Unassigned | Unassigned | Overlap (VC_544/VC_574)           | Ref |
| MK882925 | Unassigned | Unassigned | Unassigned | Outlier                           | Ref |
| MK894437 | Unassigned | Unassigned | Unassigned | Overlap (VC_1297/VC_1298)         | Ref |
| MK903280 | Unassigned | Unassigned | Unassigned | Overlap (VC_76/VC_117)            | Ref |
| MK905543 | Unassigned | Unassigned | Unassigned | Overlap (VC_456/VC_457)           | Ref |
| MK911750 | Unassigned | Unassigned | Unassigned | Overlap (VC_326/VC_654/VC_814)    | Ref |
| MK937592 | Unassigned | Unassigned | Unassigned | Overlap (VC_581/VC_582)           | Ref |
| MK937605 | Unassigned | Unassigned | Unassigned | Overlap (VC_234/VC_975)           | Ref |
| MK937609 | Unassigned | Unassigned | Unassigned | Overlap (VC_544/VC_574)           | Ref |
| MK967380 | Unassigned | Unassigned | Unassigned | Outlier                           | Ref |
| MK972688 | Unassigned | Unassigned | Unassigned | Overlap (VC_31/VC_40)             | Ref |
| MK972689 | Unassigned | Unassigned | Unassigned | Overlap (VC_31/VC_40)             | Ref |
| MK972695 | Unassigned | Unassigned | Unassigned | Overlap (VC_31/VC_40)             | Ref |
| MK972696 | Unassigned | Unassigned | Unassigned | Overlap (VC_31/VC_40)             | Ref |
| MK972697 | Unassigned | Unassigned | Unassigned | Overlap (VC_31/VC_40)             | Ref |
| MK977695 | Unassigned | Unassigned | Unassigned | Overlap (VC_581/VC_582/VC_583)    | Ref |
| MK977696 | Unassigned | Unassigned | Unassigned | Overlap (VC_581/VC_582/VC_583)    | Ref |
| MK977703 | Unassigned | Unassigned | Unassigned | Overlap (VC_1073/VC_1074/VC_1078) | Ref |
| MK977704 | Unassigned | Unassigned | Unassigned | Overlap (VC_1138/VC_1139)         | Ref |
| MK977707 | Unassigned | Unassigned | Unassigned | Outlier                           | Ref |
| MK984681 | Unassigned | Unassigned | Unassigned | Overlap (VC_498/VC_500)           | Ref |
| MK994522 | Unassigned | Unassigned | Unassigned | Singleton                         | Ref |
| MN013081 | Unassigned | Unassigned | Unassigned | Overlap (VC_509/VC_510)           | Ref |
| MN013084 | Unassigned | Unassigned | Unassigned | Overlap (VC_293/VC_297/VC_509)    | Ref |
| MN013090 | Unassigned | Unassigned | Unassigned | Overlap (VC_83/VC_637)            | Ref |
| MN013189 | Unassigned | Unassigned | Unassigned | Singleton                         | Ref |
| MN044033 | Unassigned | Unassigned | Unassigned | Overlap (VC_509/VC_510)           | Ref |
| MN062189 | Unassigned | Unassigned | Unassigned | Overlap (VC_83/VC_637)            | Ref |
| MN062703 | Unassigned | Unassigned | Unassigned | Overlap (VC_1297/VC_1298)         | Ref |
| MN062705 | Unassigned | Unassigned | Unassigned | Overlap (VC_1017/VC_1018)         | Ref |
| MN062720 | Unassigned | Unassigned | Unassigned | Outlier                           | Ref |
| MN082625 | Unassigned | Unassigned | Unassigned | Overlap (VC_843/VC_846)           | Ref |
| MN096267 | Unassigned | Unassigned | Unassigned | Overlap (VC_183/VC_303)           | Ref |
| MN096355 | Unassigned | Unassigned | Unassigned | Outlier                           | Ref |
| MN096362 | Unassigned | Unassigned | Unassigned | Outlier                           | Ref |
| MN096369 | Unassigned | Unassigned | Unassigned | Overlap (VC_1141/VC_1142)         | Ref |
| MN096382 | Unassigned | Unassigned | Unassigned | Overlap (VC_917/VC_919)           | Ref |
| MN102376 | Unassigned | Unassigned | Unassigned | Overlap (VC_822/VC_1000)          | Ref |
| MN103401 | Unassigned | Unassigned | Unassigned | Outlier                           | Ref |
| MN103533 | Unassigned | Unassigned | Unassigned | Outlier                           | Ref |
| MN106244 | Unassigned | Unassigned | Unassigned | Overlap (VC_612/VC_617)           | Ref |
| MN106245 | Unassigned | Unassigned | Unassigned | Overlap (VC_509/VC_510)           | Ref |
| MN175679 | Unassigned | Unassigned | Unassigned | Overlap (VC_822/VC_1000)          | Ref |



|          |            |            |            |                                       |     |
|----------|------------|------------|------------|---------------------------------------|-----|
| MN176220 | Unassigned | Unassigned | Unassigned | Overlap (VC_103/VC_108)               | Ref |
| MN176221 | Unassigned | Unassigned | Unassigned | Overlap (VC_103/VC_108)               | Ref |
| MN176230 | Unassigned | Unassigned | Unassigned | Overlap (VC_103/VC_108)               | Ref |
| MN176231 | Unassigned | Unassigned | Unassigned | Overlap (VC_103/VC_108)               | Ref |
| MN176232 | Unassigned | Unassigned | Unassigned | Overlap (VC_103/VC_108)               | Ref |
| MN180253 | Unassigned | Unassigned | Unassigned | Outlier                               | Ref |
| MN184886 | Unassigned | Unassigned | Unassigned | Outlier                               | Ref |
| MN204502 | Unassigned | Unassigned | Unassigned | Overlap (VC_539/VC_568)               | Ref |
| MN224566 | Unassigned | Unassigned | Unassigned | Outlier                               | Ref |
| MN234170 | Unassigned | Unassigned | Unassigned | Outlier                               | Ref |
| MN234172 | Unassigned | Unassigned | Unassigned | Outlier                               | Ref |
| MN234173 | Unassigned | Unassigned | Unassigned | Overlap (VC_1205/VC_1206)             | Ref |
| MN234175 | Unassigned | Unassigned | Unassigned | Overlap (VC_1205/VC_1206)             | Ref |
| MN234180 | Unassigned | Unassigned | Unassigned | Overlap (VC_1205/VC_1206)             | Ref |
| MN234184 | Unassigned | Unassigned | Unassigned | Outlier                               | Ref |
| MN234186 | Unassigned | Unassigned | Unassigned | Overlap (VC_1205/VC_1206)             | Ref |
| MN234187 | Unassigned | Unassigned | Unassigned | Overlap (VC_918/VC_919)               | Ref |
| MN234188 | Unassigned | Unassigned | Unassigned | Outlier                               | Ref |
| MN234189 | Unassigned | Unassigned | Unassigned | Overlap (VC_1017/VC_1018)             | Ref |
| MN234191 | Unassigned | Unassigned | Unassigned | Outlier                               | Ref |
| MN234202 | Unassigned | Unassigned | Unassigned | Overlap (VC_1205/VC_1206)             | Ref |
| MN234210 | Unassigned | Unassigned | Unassigned | Overlap (VC_1205/VC_1206)             | Ref |
| MN234216 | Unassigned | Unassigned | Unassigned | Singleton                             | Ref |
| MN234218 | Unassigned | Unassigned | Unassigned | Overlap (VC_544/VC_574)               | Ref |
| MN234229 | Unassigned | Unassigned | Unassigned | Overlap (VC_1205/VC_1206)             | Ref |
| MN266305 | Unassigned | Unassigned | Unassigned | Outlier                               | Ref |
| MN270889 | Unassigned | Unassigned | Unassigned | Overlap (VC_497/VC_498/VC_500)        | Ref |
| MN270890 | Unassigned | Unassigned | Unassigned | Overlap (VC_497/VC_498/VC_500)        | Ref |
| MN284903 | Unassigned | Unassigned | Unassigned | Outlier                               | Ref |
| MN308080 | Unassigned | Unassigned | Unassigned | Overlap (VC_405/VC_408)               | Ref |
| MN327636 | Unassigned | Unassigned | Unassigned | Overlap (VC_405/VC_408)               | Ref |
| MN335165 | Unassigned | Unassigned | Unassigned | Singleton                             | Ref |
| MN379461 | Unassigned | Unassigned | Unassigned | Outlier                               | Ref |
| MN379631 | Unassigned | Unassigned | Unassigned | Outlier                               | Ref |
| MN379634 | Unassigned | Unassigned | Unassigned | Overlap (VC_1097/VC_1103/VC_1184)     | Ref |
| MN379635 | Unassigned | Unassigned | Unassigned | Overlap (VC_1162/VC_1164)             | Ref |
| MN379642 | Unassigned | Unassigned | Unassigned | Overlap (VC_1096/VC_1100)             | Ref |
| MN379644 | Unassigned | Unassigned | Unassigned | Overlap (VC_1121/VC_1123)             | Ref |
| MN379648 | Unassigned | Unassigned | Unassigned | Overlap (VC_1336/VC_1359)             | Ref |
| MN379649 | Unassigned | Unassigned | Unassigned | Overlap (VC_1121/VC_1123)             | Ref |
| MN395284 | Unassigned | Unassigned | Unassigned | Overlap (VC_509/VC_510)               | Ref |
| MN399336 | Unassigned | Unassigned | Unassigned | Overlap (VC_717/VC_719)               | Ref |
| MN428047 | Unassigned | Unassigned | Unassigned | Overlap (VC_539/VC_568)               | Ref |
| MN428048 | Unassigned | Unassigned | Unassigned | Overlap (VC_544/VC_574)               | Ref |
| MN428055 | Unassigned | Unassigned | Unassigned | Overlap (VC_544/VC_574)               | Ref |
| MN428057 | Unassigned | Unassigned | Unassigned | Overlap (VC_544/VC_574)               | Ref |
| MN434092 | Unassigned | Unassigned | Unassigned | Overlap (VC_509/VC_510)               | Ref |
| MN478374 | Unassigned | Unassigned | Unassigned | Overlap (VC_615/VC_616)               | Ref |
| MN478376 | Unassigned | Unassigned | Unassigned | Overlap (VC_469/VC_1068)              | Ref |
| MN497414 | Unassigned | Unassigned | Unassigned | Outlier                               | Ref |
| MN497415 | Unassigned | Unassigned | Unassigned | Overlap (VC_717/VC_719)               | Ref |
| MN505213 | Unassigned | Unassigned | Unassigned | Outlier                               | Ref |
| MN508356 | Unassigned | Unassigned | Unassigned | Outlier                               | Ref |
| MN518139 | Unassigned | Unassigned | Unassigned | Outlier                               | Ref |
| MN524844 | Unassigned | Unassigned | Unassigned | Overlap (VC_843/VC_847)               | Ref |
| MN524845 | Unassigned | Unassigned | Unassigned | Overlap (VC_843/VC_847)               | Ref |
| MN530981 | Unassigned | Unassigned | Unassigned | Outlier                               | Ref |
| MN534315 | Unassigned | Unassigned | Unassigned | Overlap (VC_263/VC_268)               | Ref |
| MN534318 | Unassigned | Unassigned | Unassigned | Overlap (VC_263/VC_268)               | Ref |
| MN534319 | Unassigned | Unassigned | Unassigned | Overlap (VC_263/VC_268)               | Ref |
| MN536026 | Unassigned | Unassigned | Unassigned | Outlier                               | Ref |
| MN539721 | Unassigned | Unassigned | Unassigned | Outlier                               | Ref |
| MN545971 | Unassigned | Unassigned | Unassigned | Outlier                               | Ref |
| MN562221 | Unassigned | Unassigned | Unassigned | Overlap (VC_456/VC_457)               | Ref |
| MN584918 | Unassigned | Unassigned | Unassigned | Outlier                               | Ref |
| MN585195 | Unassigned | Unassigned | Unassigned | Outlier                               | Ref |
| MN586018 | Unassigned | Unassigned | Unassigned | Overlap (VC_917/VC_919)               | Ref |
| MN586020 | Unassigned | Unassigned | Unassigned | Outlier                               | Ref |
| MN586023 | Unassigned | Unassigned | Unassigned | Overlap (VC_917/VC_919)               | Ref |
| MN586025 | Unassigned | Unassigned | Unassigned | Overlap (VC_245/VC_247)               | Ref |
| MN586033 | Unassigned | Unassigned | Unassigned | Outlier                               | Ref |
| MN586040 | Unassigned | Unassigned | Unassigned | Overlap (VC_577/VC_581/VC_582/VC_583) | Ref |
| MN602881 | Unassigned | Unassigned | Unassigned | Outlier                               | Ref |
| MN605466 | Unassigned | Unassigned | Unassigned | Outlier                               | Ref |
| MN617835 | Unassigned | Unassigned | Unassigned | Overlap (VC_293/VC_297/VC_509)        | Ref |
| MN617841 | Unassigned | Unassigned | Unassigned | Overlap (VC_917/VC_919)               | Ref |
| MN685189 | Unassigned | Unassigned | Unassigned | Overlap (VC_497/VC_498/VC_500)        | Ref |
| MN685190 | Unassigned | Unassigned | Unassigned | Overlap (VC_497/VC_498/VC_500)        | Ref |
| MN685191 | Unassigned | Unassigned | Unassigned | Overlap (VC_497/VC_498/VC_500)        | Ref |
| MN692199 | Unassigned | Unassigned | Unassigned | Outlier                               | Ref |
| MN692200 | Unassigned | Unassigned | Unassigned | Outlier                               | Ref |



|          |            |            |            |                                |     |
|----------|------------|------------|------------|--------------------------------|-----|
| MN698244 | Unassigned | Unassigned | Unassigned | Outlier                        | Ref |
| MN718199 | Unassigned | Unassigned | Unassigned | Outlier                        | Ref |
| MN732896 | Unassigned | Unassigned | Unassigned | Outlier                        | Ref |
| MN734436 | Unassigned | Unassigned | Unassigned | Outlier                        | Ref |
| MN735433 | Unassigned | Unassigned | Unassigned | Overlap (VC_539/VC_568)        | Ref |
| MN781108 | Unassigned | Unassigned | Unassigned | Overlap (VC_509/VC_510)        | Ref |
| MN794238 | Unassigned | Unassigned | Unassigned | Overlap (VC_936/VC_938)        | Ref |
| MN812211 | Unassigned | Unassigned | Unassigned | Outlier                        | Ref |
| MN812239 | Unassigned | Unassigned | Unassigned | Outlier                        | Ref |
| MN812689 | Unassigned | Unassigned | Unassigned | Outlier                        | Ref |
| MN813681 | Unassigned | Unassigned | Unassigned | Overlap (VC_234/VC_975)        | Ref |
| MN813685 | Unassigned | Unassigned | Unassigned | Outlier                        | Ref |
| MN813686 | Unassigned | Unassigned | Unassigned | Outlier                        | Ref |
| MN820898 | Unassigned | Unassigned | Unassigned | Outlier                        | Ref |
| MN830259 | Unassigned | Unassigned | Unassigned | Overlap (VC_280/VC_392)        | Ref |
| MN840487 | Unassigned | Unassigned | Unassigned | Overlap (VC_965/VC_1091)       | Ref |
| MN850599 | Unassigned | Unassigned | Unassigned | Outlier                        | Ref |
| MN850656 | Unassigned | Unassigned | Unassigned | Outlier                        | Ref |
| MN857473 | Unassigned | Unassigned | Unassigned | Outlier                        | Ref |
| MN857617 | Unassigned | Unassigned | Unassigned | Overlap (VC_843/VC_846)        | Ref |
| MN862334 | Unassigned | Unassigned | Unassigned | Overlap (VC_419/VC_1306)       | Ref |
| MN862336 | Unassigned | Unassigned | Unassigned | Overlap (VC_207/VC_415)        | Ref |
| MN862337 | Unassigned | Unassigned | Unassigned | Overlap (VC_1031/VC_1035)      | Ref |
| MN862342 | Unassigned | Unassigned | Unassigned | Overlap (VC_207/VC_415)        | Ref |
| MN862344 | Unassigned | Unassigned | Unassigned | Outlier                        | Ref |
| MN871477 | Unassigned | Unassigned | Unassigned | Outlier                        | Ref |
| MN877442 | Unassigned | Unassigned | Unassigned | Outlier                        | Ref |
| MN882550 | Unassigned | Unassigned | Unassigned | Overlap (VC_1290/VC_1477)      | Ref |
| MN882551 | Unassigned | Unassigned | Unassigned | Overlap (VC_721/VC_1479)       | Ref |
| MN882552 | Unassigned | Unassigned | Unassigned | Overlap (VC_721/VC_1479)       | Ref |
| MN882553 | Unassigned | Unassigned | Unassigned | Overlap (VC_841/VC_1481)       | Ref |
| MN882554 | Unassigned | Unassigned | Unassigned | Overlap (VC_1290/VC_1477)      | Ref |
| MN892485 | Unassigned | Unassigned | Unassigned | Outlier                        | Ref |
| MN908684 | Unassigned | Unassigned | Unassigned | Overlap (VC_1074/VC_1078)      | Ref |
| MN908686 | Unassigned | Unassigned | Unassigned | Overlap (VC_1204/VC_1299)      | Ref |
| MN908687 | Unassigned | Unassigned | Unassigned | Overlap (VC_581/VC_582/VC_583) | Ref |
| MN908688 | Unassigned | Unassigned | Unassigned | Outlier                        | Ref |
| MN908694 | Unassigned | Unassigned | Unassigned | Overlap (VC_1213/VC_1214)      | Ref |
| MN917146 | Unassigned | Unassigned | Unassigned | Overlap (VC_692/VC_693)        | Ref |
| MN922296 | Unassigned | Unassigned | Unassigned | Overlap (VC_367/VC_636)        | Ref |
| MN935203 | Unassigned | Unassigned | Unassigned | Overlap (VC_202/VC_203)        | Ref |
| MN938931 | Unassigned | Unassigned | Unassigned | Overlap (VC_326/VC_654/VC_814) | Ref |
| MN945900 | Unassigned | Unassigned | Unassigned | Overlap (VC_539/VC_568)        | Ref |
| MN956515 | Unassigned | Unassigned | Unassigned | Overlap (VC_367/VC_636)        | Ref |
| MN988464 | Unassigned | Unassigned | Unassigned | Overlap (VC_1468/VC_1471)      | Ref |
| MN988476 | Unassigned | Unassigned | Unassigned | Overlap (VC_1468/VC_1471)      | Ref |
| MN988477 | Unassigned | Unassigned | Unassigned | Overlap (VC_1468/VC_1471)      | Ref |
| MN988483 | Unassigned | Unassigned | Unassigned | Overlap (VC_806/VC_808)        | Ref |
| MN988487 | Unassigned | Unassigned | Unassigned | Outlier                        | Ref |
| MN988497 | Unassigned | Unassigned | Unassigned | Overlap (VC_806/VC_808)        | Ref |
| MN988517 | Unassigned | Unassigned | Unassigned | Overlap (VC_806/VC_808)        | Ref |
| MN988519 | Unassigned | Unassigned | Unassigned | Outlier                        | Ref |
| MN988539 | Unassigned | Unassigned | Unassigned | Outlier                        | Ref |
| MN988542 | Unassigned | Unassigned | Unassigned | Outlier                        | Ref |
| MN988551 | Unassigned | Unassigned | Unassigned | Overlap (VC_762/VC_763)        | Ref |
| MN988555 | Unassigned | Unassigned | Unassigned | Overlap (VC_806/VC_808)        | Ref |
| MN995824 | Unassigned | Unassigned | Unassigned | Overlap (VC_445/VC_757)        | Ref |
| MT002873 | Unassigned | Unassigned | Unassigned | Outlier                        | Ref |
| MT024859 | Unassigned | Unassigned | Unassigned | Outlier                        | Ref |
| MT024862 | Unassigned | Unassigned | Unassigned | Overlap (VC_1204/VC_1299)      | Ref |
| MT028491 | Unassigned | Unassigned | Unassigned | Outlier                        | Ref |
| MT028492 | Unassigned | Unassigned | Unassigned | Outlier                        | Ref |
| MT094430 | Unassigned | Unassigned | Unassigned | Overlap (VC_72/VC_75)          | Ref |
| MT104122 | Unassigned | Unassigned | Unassigned | Outlier                        | Ref |
| MT104467 | Unassigned | Unassigned | Unassigned | Overlap (VC_469/VC_1068)       | Ref |
| MT104474 | Unassigned | Unassigned | Unassigned | Outlier                        | Ref |
| MT114163 | Unassigned | Unassigned | Unassigned | Overlap (VC_581/VC_582)        | Ref |
| MT118296 | Unassigned | Unassigned | Unassigned | Outlier                        | Ref |
| MT121960 | Unassigned | Unassigned | Unassigned | Outlier                        | Ref |
| MT121968 | Unassigned | Unassigned | Unassigned | Outlier                        | Ref |
| MT135260 | Unassigned | Unassigned | Unassigned | Outlier                        | Ref |
| MT135270 | Unassigned | Unassigned | Unassigned | Outlier                        | Ref |
| MT135279 | Unassigned | Unassigned | Unassigned | Outlier                        | Ref |
| MT135280 | Unassigned | Unassigned | Unassigned | Outlier                        | Ref |
| MT135284 | Unassigned | Unassigned | Unassigned | Singleton                      | Ref |
| MT135286 | Unassigned | Unassigned | Unassigned | Outlier                        | Ref |
| MT135295 | Unassigned | Unassigned | Unassigned | Singleton                      | Ref |
| MT135300 | Unassigned | Unassigned | Unassigned | Outlier                        | Ref |
| MT135312 | Unassigned | Unassigned | Unassigned | Outlier                        | Ref |
| MT135313 | Unassigned | Unassigned | Unassigned | Singleton                      | Ref |
| MT135327 | Unassigned | Unassigned | Unassigned | Outlier                        | Ref |



|          |            |            |            |                                       |     |
|----------|------------|------------|------------|---------------------------------------|-----|
| MT135331 | Unassigned | Unassigned | Unassigned | Overlap (VC_1359/VC_1360)             | Ref |
| MT135341 | Unassigned | Unassigned | Unassigned | Singleton                             | Ref |
| MT135342 | Unassigned | Unassigned | Unassigned | Outlier                               | Ref |
| MT135356 | Unassigned | Unassigned | Unassigned | Outlier                               | Ref |
| MT135360 | Unassigned | Unassigned | Unassigned | Singleton                             | Ref |
| MT135362 | Unassigned | Unassigned | Unassigned | Overlap (VC_1310/VC_1380)             | Ref |
| MT135364 | Unassigned | Unassigned | Unassigned | Singleton                             | Ref |
| MT135386 | Unassigned | Unassigned | Unassigned | Singleton                             | Ref |
| MT135390 | Unassigned | Unassigned | Unassigned | Outlier                               | Ref |
| MT135398 | Unassigned | Unassigned | Unassigned | Overlap (VC_1310/VC_1380)             | Ref |
| MT135417 | Unassigned | Unassigned | Unassigned | Outlier                               | Ref |
| MT135428 | Unassigned | Unassigned | Unassigned | Singleton                             | Ref |
| MT135442 | Unassigned | Unassigned | Unassigned | Singleton                             | Ref |
| MT135449 | Unassigned | Unassigned | Unassigned | Singleton                             | Ref |
| MT135450 | Unassigned | Unassigned | Unassigned | Outlier                               | Ref |
| MT135452 | Unassigned | Unassigned | Unassigned | Outlier                               | Ref |
| MT135461 | Unassigned | Unassigned | Unassigned | Overlap (VC_1359/VC_1360)             | Ref |
| MT135464 | Unassigned | Unassigned | Unassigned | Singleton                             | Ref |
| MT151386 | Unassigned | Unassigned | Unassigned | Outlier                               | Ref |
| MT161385 | Unassigned | Unassigned | Unassigned | Outlier                               | Ref |
| MT161386 | Unassigned | Unassigned | Unassigned | Overlap (VC_555/VC_637)               | Ref |
| MT161387 | Unassigned | Unassigned | Unassigned | Overlap (VC_555/VC_637)               | Ref |
| MT162468 | Unassigned | Unassigned | Unassigned | Overlap (VC_449/VC_675)               | Ref |
| MT176427 | Unassigned | Unassigned | Unassigned | Overlap (VC_472/VC_605)               | Ref |
| MT188704 | Unassigned | Unassigned | Unassigned | Outlier                               | Ref |
| MT192033 | Unassigned | Unassigned | Unassigned | Outlier                               | Ref |
| MT210152 | Unassigned | Unassigned | Unassigned | Outlier                               | Ref |
| MT225100 | Unassigned | Unassigned | Unassigned | Overlap (VC_44/VC_59)                 | Ref |
| MT225101 | Unassigned | Unassigned | Unassigned | Outlier                               | Ref |
| MT233525 | Unassigned | Unassigned | Unassigned | Outlier                               | Ref |
| MT259468 | Unassigned | Unassigned | Unassigned | Outlier                               | Ref |
| MT303952 | Unassigned | Unassigned | Unassigned | Overlap (VC_648/VC_649)               | Ref |
| MT310857 | Unassigned | Unassigned | Unassigned | Overlap (VC_234/VC_975)               | Ref |
| MT310862 | Unassigned | Unassigned | Unassigned | Overlap (VC_1017/VC_1018)             | Ref |
| MT310894 | Unassigned | Unassigned | Unassigned | Overlap (VC_1213/VC_1214)             | Ref |
| MT311967 | Unassigned | Unassigned | Unassigned | Overlap (VC_648/VC_649)               | Ref |
| MT311968 | Unassigned | Unassigned | Unassigned | Overlap (VC_648/VC_649)               | Ref |
| MT325768 | Unassigned | Unassigned | Unassigned | Overlap (VC_648/VC_649)               | Ref |
| MT330372 | Unassigned | Unassigned | Unassigned | Outlier                               | Ref |
| MT345684 | Unassigned | Unassigned | Unassigned | Outlier                               | Ref |
| MT349887 | Unassigned | Unassigned | Unassigned | Outlier                               | Ref |
| MT360682 | Unassigned | Unassigned | Unassigned | Outlier                               | Ref |
| MT362618 | Unassigned | Unassigned | Unassigned | Outlier                               | Ref |
| MT375522 | Unassigned | Unassigned | Unassigned | Outlier                               | Ref |
| MT375523 | Unassigned | Unassigned | Unassigned | Overlap (VC_497/VC_498)               | Ref |
| MT375524 | Unassigned | Unassigned | Unassigned | Overlap (VC_497/VC_498)               | Ref |
| MT410774 | Unassigned | Unassigned | Unassigned | Outlier                               | Ref |
| MT416612 | Unassigned | Unassigned | Unassigned | Overlap (VC_89/VC_90)                 | Ref |
| MT446395 | Unassigned | Unassigned | Unassigned | Overlap (VC_472/VC_605)               | Ref |
| MT446401 | Unassigned | Unassigned | Unassigned | Overlap (VC_472/VC_605)               | Ref |
| MT446404 | Unassigned | Unassigned | Unassigned | Overlap (VC_472/VC_605)               | Ref |
| MT448615 | Unassigned | Unassigned | Unassigned | Outlier                               | Ref |
| MT451980 | Unassigned | Unassigned | Unassigned | Overlap (VC_743/VC_745)               | Ref |
| MT451981 | Unassigned | Unassigned | Unassigned | Overlap (VC_743/VC_745)               | Ref |
| MT451982 | Unassigned | Unassigned | Unassigned | Overlap (VC_743/VC_745)               | Ref |
| MT451983 | Unassigned | Unassigned | Unassigned | Overlap (VC_1204/VC_1299)             | Ref |
| MT451984 | Unassigned | Unassigned | Unassigned | Overlap (VC_1204/VC_1299)             | Ref |
| MT498043 | Unassigned | Unassigned | Unassigned | Outlier                               | Ref |
| MT498058 | Unassigned | Unassigned | Unassigned | Outlier                               | Ref |
| MT498062 | Unassigned | Unassigned | Unassigned | Overlap (VC_1297/VC_1298)             | Ref |
| MT498063 | Unassigned | Unassigned | Unassigned | Overlap (VC_1204/VC_1299)             | Ref |
| MT500539 | Unassigned | Unassigned | Unassigned | Outlier                               | Ref |
| MT521991 | Unassigned | Unassigned | Unassigned | Overlap (VC_743/VC_745)               | Ref |
| MT521992 | Unassigned | Unassigned | Unassigned | Outlier                               | Ref |
| MT521993 | Unassigned | Unassigned | Unassigned | Overlap (VC_577/VC_581/VC_582/VC_583) | Ref |
| MT522000 | Unassigned | Unassigned | Unassigned | Overlap (VC_539/VC_542)               | Ref |
| MT553342 | Unassigned | Unassigned | Unassigned | Overlap (VC_1213/VC_1214)             | Ref |
| MT553347 | Unassigned | Unassigned | Unassigned | Overlap (VC_539/VC_570)               | Ref |
| MT584811 | Unassigned | Unassigned | Unassigned | Outlier                               | Ref |
| MT596497 | Unassigned | Unassigned | Unassigned | Overlap (VC_13/VC_29)                 | Ref |
| MT596498 | Unassigned | Unassigned | Unassigned | Overlap (VC_13/VC_29)                 | Ref |
| MT596500 | Unassigned | Unassigned | Unassigned | Overlap (VC_99/VC_101)                | Ref |
| MT597419 | Unassigned | Unassigned | Unassigned | Outlier                               | Ref |
| MT647606 | Unassigned | Unassigned | Unassigned | Outlier                               | Ref |
| MT663720 | Unassigned | Unassigned | Unassigned | Outlier                               | Ref |
| MT664721 | Unassigned | Unassigned | Unassigned | Outlier                               | Ref |
| MT679222 | Unassigned | Unassigned | Unassigned | Overlap (VC_202/VC_203)               | Ref |
| MT679223 | Unassigned | Unassigned | Unassigned | Overlap (VC_202/VC_203)               | Ref |
| MT700412 | Unassigned | Unassigned | Unassigned | Outlier                               | Ref |
| MT701590 | Unassigned | Unassigned | Unassigned | Overlap (VC_456/VC_457)               | Ref |
| MT708545 | Unassigned | Unassigned | Unassigned | Outlier                               | Ref |



|          |            |            |            |                           |     |
|----------|------------|------------|------------|---------------------------|-----|
| MT711370 | Unassigned | Unassigned | Unassigned | Singleton                 | Ref |
| MT711977 | Unassigned | Unassigned | Unassigned | Singleton                 | Ref |
| MT724048 | Unassigned | Unassigned | Unassigned | Outlier                   | Ref |
| MT732457 | Unassigned | Unassigned | Unassigned | Outlier                   | Ref |
| MT732473 | Unassigned | Unassigned | Unassigned | Outlier                   | Ref |
| MT732474 | Unassigned | Unassigned | Unassigned | Outlier                   | Ref |
| MT732475 | Unassigned | Unassigned | Unassigned | Outlier                   | Ref |
| MT735630 | Unassigned | Unassigned | Unassigned | Overlap (VC_936/VC_938)   | Ref |
| MT740245 | Unassigned | Unassigned | Unassigned | Overlap (VC_202/VC_203)   | Ref |
| MT740307 | Unassigned | Unassigned | Unassigned | Outlier                   | Ref |
| MT740315 | Unassigned | Unassigned | Unassigned | Outlier                   | Ref |
| MT740725 | Unassigned | Unassigned | Unassigned | Overlap (VC_378/VC_383)   | Ref |
| MT740729 | Unassigned | Unassigned | Unassigned | Overlap (VC_378/VC_383)   | Ref |
| MT740735 | Unassigned | Unassigned | Unassigned | Overlap (VC_378/VC_383)   | Ref |
| MT740744 | Unassigned | Unassigned | Unassigned | Overlap (VC_378/VC_383)   | Ref |
| MT740746 | Unassigned | Unassigned | Unassigned | Overlap (VC_378/VC_383)   | Ref |
| MT740747 | Unassigned | Unassigned | Unassigned | Overlap (VC_378/VC_383)   | Ref |
| MT740748 | Unassigned | Unassigned | Unassigned | Overlap (VC_84/VC_86)     | Ref |
| MT747435 | Unassigned | Unassigned | Unassigned | Overlap (VC_445/VC_757)   | Ref |
| MT764845 | Unassigned | Unassigned | Unassigned | Outlier                   | Ref |
| MT771343 | Unassigned | Unassigned | Unassigned | Outlier                   | Ref |
| MT771346 | Unassigned | Unassigned | Unassigned | Overlap (VC_544/VC_574)   | Ref |
| MT771349 | Unassigned | Unassigned | Unassigned | Overlap (VC_917/VC_919)   | Ref |
| MT774377 | Unassigned | Unassigned | Unassigned | Overlap (VC_692/VC_693)   | Ref |
| MT774401 | Unassigned | Unassigned | Unassigned | Overlap (VC_520/VC_522)   | Ref |
| MT774402 | Unassigned | Unassigned | Unassigned | Overlap (VC_521/VC_523)   | Ref |
| MT774406 | Unassigned | Unassigned | Unassigned | Overlap (VC_521/VC_523)   | Ref |
| MT783706 | Unassigned | Unassigned | Unassigned | Outlier                   | Ref |
| MT806187 | Unassigned | Unassigned | Unassigned | Outlier                   | Ref |
| MT843276 | Unassigned | Unassigned | Unassigned | Outlier                   | Ref |
| MT855965 | Unassigned | Unassigned | Unassigned | Singleton                 | Ref |
| MT872956 | Unassigned | Unassigned | Unassigned | Outlier                   | Ref |
| MT880870 | Unassigned | Unassigned | Unassigned | Outlier                   | Ref |
| MT880871 | Unassigned | Unassigned | Unassigned | Outlier                   | Ref |
| MT889377 | Unassigned | Unassigned | Unassigned | Overlap (VC_1204/VC_1299) | Ref |
| MT889380 | Unassigned | Unassigned | Unassigned | Overlap (VC_539/VC_569)   | Ref |
| MT889387 | Unassigned | Unassigned | Unassigned | Outlier                   | Ref |
| MT901797 | Unassigned | Unassigned | Unassigned | Overlap (VC_63/VC_64)     | Ref |
| MT901798 | Unassigned | Unassigned | Unassigned | Overlap (VC_63/VC_64)     | Ref |
| MT901799 | Unassigned | Unassigned | Unassigned | Overlap (VC_63/VC_64)     | Ref |
| MT901800 | Unassigned | Unassigned | Unassigned | Overlap (VC_63/VC_64)     | Ref |
| MT939240 | Unassigned | Unassigned | Unassigned | Outlier                   | Ref |
| MT939242 | Unassigned | Unassigned | Unassigned | Overlap (VC_711/VC_712)   | Ref |
| MT939492 | Unassigned | Unassigned | Unassigned | Outlier                   | Ref |
| MT951568 | Unassigned | Unassigned | Unassigned | Overlap (VC_76/VC_117)    | Ref |
| MT952843 | Unassigned | Unassigned | Unassigned | Overlap (VC_1138/VC_1139) | Ref |
| MW009675 | Unassigned | Unassigned | Unassigned | Overlap (VC_367/VC_636)   | Ref |
| MW021759 | Unassigned | Unassigned | Unassigned | Overlap (VC_83/VC_637)    | Ref |
| MW021761 | Unassigned | Unassigned | Unassigned | Overlap (VC_1410/VC_1411) | Ref |
| MW021767 | Unassigned | Unassigned | Unassigned | Overlap (VC_1410/VC_1411) | Ref |
| MW055913 | Unassigned | Unassigned | Unassigned | Outlier                   | Ref |
| MW057856 | Unassigned | Unassigned | Unassigned | Outlier                   | Ref |
| MW057861 | Unassigned | Unassigned | Unassigned | Outlier                   | Ref |
| MW057862 | Unassigned | Unassigned | Unassigned | Outlier                   | Ref |
| MW082583 | Unassigned | Unassigned | Unassigned | Outlier                   | Ref |
| MW082584 | Unassigned | Unassigned | Unassigned | Outlier                   | Ref |
| MW091528 | Unassigned | Unassigned | Unassigned | Outlier                   | Ref |
| MW117965 | Unassigned | Unassigned | Unassigned | Outlier                   | Ref |
| MW145136 | Unassigned | Unassigned | Unassigned | Overlap (VC_72/VC_75)     | Ref |
| MW145137 | Unassigned | Unassigned | Unassigned | Outlier                   | Ref |
| MW145138 | Unassigned | Unassigned | Unassigned | Overlap (VC_477/VC_629)   | Ref |
| MW151244 | Unassigned | Unassigned | Unassigned | Overlap (VC_767/VC_768)   | Ref |
| MW202423 | Unassigned | Unassigned | Unassigned | Singleton                 | Ref |
| MW202426 | Unassigned | Unassigned | Unassigned | Singleton                 | Ref |
| MW202444 | Unassigned | Unassigned | Unassigned | Singleton                 | Ref |
| MW202455 | Unassigned | Unassigned | Unassigned | Outlier                   | Ref |
| MW202458 | Unassigned | Unassigned | Unassigned | Singleton                 | Ref |
| MW202476 | Unassigned | Unassigned | Unassigned | Singleton                 | Ref |
| MW202477 | Unassigned | Unassigned | Unassigned | Outlier                   | Ref |
| MW202481 | Unassigned | Unassigned | Unassigned | Outlier                   | Ref |
| MW202482 | Unassigned | Unassigned | Unassigned | Singleton                 | Ref |
| MW202483 | Unassigned | Unassigned | Unassigned | Outlier                   | Ref |
| MW202484 | Unassigned | Unassigned | Unassigned | Singleton                 | Ref |
| MW202485 | Unassigned | Unassigned | Unassigned | Outlier                   | Ref |
| MW202491 | Unassigned | Unassigned | Unassigned | Outlier                   | Ref |
| MW202497 | Unassigned | Unassigned | Unassigned | Singleton                 | Ref |
| MW202510 | Unassigned | Unassigned | Unassigned | Outlier                   | Ref |
| MW202512 | Unassigned | Unassigned | Unassigned | Outlier                   | Ref |
| MW202554 | Unassigned | Unassigned | Unassigned | Singleton                 | Ref |
| MW202558 | Unassigned | Unassigned | Unassigned | Outlier                   | Ref |
| MW202561 | Unassigned | Unassigned | Unassigned | Outlier                   | Ref |



|          |            |            |            |                                |     |
|----------|------------|------------|------------|--------------------------------|-----|
| MW202567 | Unassigned | Unassigned | Unassigned | Overlap (VC_207/VC_412/VC_414) | Ref |
| MW202568 | Unassigned | Unassigned | Unassigned | Singleton                      | Ref |
| MW202573 | Unassigned | Unassigned | Unassigned | Outlier                        | Ref |
| MW202575 | Unassigned | Unassigned | Unassigned | Overlap (VC_207/VC_415)        | Ref |
| MW202577 | Unassigned | Unassigned | Unassigned | Singleton                      | Ref |
| MW202590 | Unassigned | Unassigned | Unassigned | Overlap (VC_1029/VC_1107)      | Ref |
| MW202597 | Unassigned | Unassigned | Unassigned | Overlap (VC_1028/VC_1029)      | Ref |
| MW202600 | Unassigned | Unassigned | Unassigned | Overlap (VC_1029/VC_1107)      | Ref |
| MW202615 | Unassigned | Unassigned | Unassigned | Outlier                        | Ref |
| MW202621 | Unassigned | Unassigned | Unassigned | Outlier                        | Ref |
| MW202627 | Unassigned | Unassigned | Unassigned | Singleton                      | Ref |
| MW202647 | Unassigned | Unassigned | Unassigned | Singleton                      | Ref |
| MW202675 | Unassigned | Unassigned | Unassigned | Outlier                        | Ref |
| MW202679 | Unassigned | Unassigned | Unassigned | Outlier                        | Ref |
| MW202691 | Unassigned | Unassigned | Unassigned | Outlier                        | Ref |
| MW202692 | Unassigned | Unassigned | Unassigned | Singleton                      | Ref |
| MW202693 | Unassigned | Unassigned | Unassigned | Outlier                        | Ref |
| MW202694 | Unassigned | Unassigned | Unassigned | Singleton                      | Ref |
| MW202697 | Unassigned | Unassigned | Unassigned | Outlier                        | Ref |
| MW202698 | Unassigned | Unassigned | Unassigned | Overlap (VC_207/VC_412)        | Ref |
| MW202701 | Unassigned | Unassigned | Unassigned | Outlier                        | Ref |
| MW202710 | Unassigned | Unassigned | Unassigned | Outlier                        | Ref |
| MW202713 | Unassigned | Unassigned | Unassigned | Outlier                        | Ref |
| MW202733 | Unassigned | Unassigned | Unassigned | Outlier                        | Ref |
| MW202768 | Unassigned | Unassigned | Unassigned | Overlap (VC_207/VC_415)        | Ref |
| MW202779 | Unassigned | Unassigned | Unassigned | Overlap (VC_207/VC_412/VC_414) | Ref |
| MW202783 | Unassigned | Unassigned | Unassigned | Singleton                      | Ref |
| MW202795 | Unassigned | Unassigned | Unassigned | Outlier                        | Ref |
| MW202801 | Unassigned | Unassigned | Unassigned | Singleton                      | Ref |
| MW202803 | Unassigned | Unassigned | Unassigned | Singleton                      | Ref |
| MW202816 | Unassigned | Unassigned | Unassigned | Outlier                        | Ref |
| MW202828 | Unassigned | Unassigned | Unassigned | Outlier                        | Ref |
| MW202869 | Unassigned | Unassigned | Unassigned | Outlier                        | Ref |
| MW202882 | Unassigned | Unassigned | Unassigned | Singleton                      | Ref |
| MW202893 | Unassigned | Unassigned | Unassigned | Overlap (VC_207/VC_412)        | Ref |
| MW202897 | Unassigned | Unassigned | Unassigned | Outlier                        | Ref |
| MW202898 | Unassigned | Unassigned | Unassigned | Outlier                        | Ref |
| MW221967 | Unassigned | Unassigned | Unassigned | Outlier                        | Ref |
| MW239124 | Unassigned | Unassigned | Unassigned | Overlap (VC_293/VC_297/VC_509) | Ref |
| MW247143 | Unassigned | Unassigned | Unassigned | Outlier                        | Ref |
| MW247146 | Unassigned | Unassigned | Unassigned | Outlier                        | Ref |
| MW258712 | Unassigned | Unassigned | Unassigned | Outlier                        | Ref |
| MW273921 | Unassigned | Unassigned | Unassigned | Outlier                        | Ref |
| MW286266 | Unassigned | Unassigned | Unassigned | Overlap (VC_161/VC_165)        | Ref |
| MW286267 | Unassigned | Unassigned | Unassigned | Overlap (VC_161/VC_165)        | Ref |
| MW286268 | Unassigned | Unassigned | Unassigned | Overlap (VC_161/VC_165)        | Ref |
| MW291017 | Unassigned | Unassigned | Unassigned | Outlier                        | Ref |
| MW291508 | Unassigned | Unassigned | Unassigned | Outlier                        | Ref |
| MW314849 | Unassigned | Unassigned | Unassigned | Overlap (VC_1138/VC_1139)      | Ref |
| MW314850 | Unassigned | Unassigned | Unassigned | Outlier                        | Ref |
| MW317014 | Unassigned | Unassigned | Unassigned | Outlier                        | Ref |
| MW325771 | Unassigned | Unassigned | Unassigned | Overlap (VC_293/VC_297/VC_509) | Ref |
| MW334946 | Unassigned | Unassigned | Unassigned | Outlier                        | Ref |
| MW344869 | Unassigned | Unassigned | Unassigned | Overlap (VC_293/VC_297/VC_509) | Ref |
| MW358880 | Unassigned | Unassigned | Unassigned | Outlier                        | Ref |
| MW358929 | Unassigned | Unassigned | Unassigned | Outlier                        | Ref |
| MW364971 | Unassigned | Unassigned | Unassigned | Overlap (VC_13/VC_29)          | Ref |
| MW364972 | Unassigned | Unassigned | Unassigned | Overlap (VC_13/VC_29)          | Ref |
| MW364973 | Unassigned | Unassigned | Unassigned | Overlap (VC_13/VC_29)          | Ref |
| MW364974 | Unassigned | Unassigned | Unassigned | Overlap (VC_13/VC_29)          | Ref |
| MW364975 | Unassigned | Unassigned | Unassigned | Overlap (VC_13/VC_29)          | Ref |
| MW394388 | Unassigned | Unassigned | Unassigned | Overlap (VC_865/VC_866)        | Ref |
| MW394390 | Unassigned | Unassigned | Unassigned | Outlier                        | Ref |
| MW394467 | Unassigned | Unassigned | Unassigned | Overlap (VC_103/VC_108)        | Ref |
| MW419775 | Unassigned | Unassigned | Unassigned | Overlap (VC_843/VC_847)        | Ref |
| MW423737 | Unassigned | Unassigned | Unassigned | Outlier                        | Ref |
| MW423738 | Unassigned | Unassigned | Unassigned | Outlier                        | Ref |
| MW423739 | Unassigned | Unassigned | Unassigned | Outlier                        | Ref |
| MW435855 | Unassigned | Unassigned | Unassigned | Overlap (VC_917/VC_919)        | Ref |
| MW451249 | Unassigned | Unassigned | Unassigned | Overlap (VC_771/VC_822)        | Ref |
| MW460247 | Unassigned | Unassigned | Unassigned | Outlier                        | Ref |
| MW460249 | Unassigned | Unassigned | Unassigned | Outlier                        | Ref |
| MW464860 | Unassigned | Unassigned | Unassigned | Outlier                        | Ref |
| MW476489 | Unassigned | Unassigned | Unassigned | Overlap (VC_271/VC_315)        | Ref |
| MW478289 | Unassigned | Unassigned | Unassigned | Overlap (VC_334/VC_556)        | Ref |
| MW478291 | Unassigned | Unassigned | Unassigned | Outlier                        | Ref |
| MW478292 | Unassigned | Unassigned | Unassigned | Overlap (VC_563/VC_924)        | Ref |
| MW495044 | Unassigned | Unassigned | Unassigned | Overlap (VC_865/VC_866)        | Ref |
| MW512570 | Unassigned | Unassigned | Unassigned | Outlier                        | Ref |
| MW512573 | Unassigned | Unassigned | Unassigned | Overlap (VC_141/VC_669)        | Ref |
| MW526258 | Unassigned | Unassigned | Unassigned | Outlier                        | Ref |



|          |            |            |            |                                           |     |
|----------|------------|------------|------------|-------------------------------------------|-----|
| MW560978 | Unassigned | Unassigned | Unassigned | Outlier                                   | Ref |
| MW570730 | Unassigned | Unassigned | Unassigned | Outlier                                   | Ref |
| MW582532 | Unassigned | Unassigned | Unassigned | Outlier                                   | Ref |
| MW584153 | Unassigned | Unassigned | Unassigned | Outlier                                   | Ref |
| MW584166 | Unassigned | Unassigned | Unassigned | Overlap (VC_530/VC_531)                   | Ref |
| MW584167 | Unassigned | Unassigned | Unassigned | Outlier                                   | Ref |
| MW584174 | Unassigned | Unassigned | Unassigned | Overlap (VC_530/VC_531)                   | Ref |
| MW584177 | Unassigned | Unassigned | Unassigned | Overlap (VC_573/VC_994)                   | Ref |
| MW584183 | Unassigned | Unassigned | Unassigned | Overlap (VC_573/VC_994)                   | Ref |
| MW584185 | Unassigned | Unassigned | Unassigned | Outlier                                   | Ref |
| MW584186 | Unassigned | Unassigned | Unassigned | Overlap (VC_573/VC_994)                   | Ref |
| MW584187 | Unassigned | Unassigned | Unassigned | Outlier                                   | Ref |
| MW584195 | Unassigned | Unassigned | Unassigned | Outlier                                   | Ref |
| MW584211 | Unassigned | Unassigned | Unassigned | Outlier                                   | Ref |
| MW589261 | Unassigned | Unassigned | Unassigned | Overlap (VC_686/VC_710)                   | Ref |
| MW671054 | Unassigned | Unassigned | Unassigned | Overlap (VC_84/VC_86)                     | Ref |
| MW712725 | Unassigned | Unassigned | Unassigned | Overlap (VC_1138/VC_1139)                 | Ref |
| MW735835 | Unassigned | Unassigned | Unassigned | Outlier                                   | Ref |
| MW749006 | Unassigned | Unassigned | Unassigned | Outlier                                   | Ref |
| MW749008 | Unassigned | Unassigned | Unassigned | Outlier                                   | Ref |
| MW749009 | Unassigned | Unassigned | Unassigned | Outlier                                   | Ref |
| MW788655 | Unassigned | Unassigned | Unassigned | Singleton                                 | Ref |
| MW788656 | Unassigned | Unassigned | Unassigned | Outlier                                   | Ref |
| MW805363 | Unassigned | Unassigned | Unassigned | Outlier                                   | Ref |
| MW805364 | Unassigned | Unassigned | Unassigned | Outlier                                   | Ref |
| MW822149 | Unassigned | Unassigned | Unassigned | Overlap (VC_917/VC_919)                   | Ref |
| MW824390 | Unassigned | Unassigned | Unassigned | Overlap (VC_47/VC_49)                     | Ref |
| MW824410 | Unassigned | Unassigned | Unassigned | Overlap (VC_1082/VC_1083)                 | Ref |
| MW824411 | Unassigned | Unassigned | Unassigned | Overlap (VC_1082/VC_1083)                 | Ref |
| MW825358 | Unassigned | Unassigned | Unassigned | Outlier                                   | Ref |
| MW831865 | Unassigned | Unassigned | Unassigned | Overlap (VC_76/VC_117)                    | Ref |
| MW862989 | Unassigned | Unassigned | Unassigned | Overlap (VC_539/VC_568)                   | Ref |
| MW865293 | Unassigned | Unassigned | Unassigned | Outlier                                   | Ref |
| MW865327 | Unassigned | Unassigned | Unassigned | Outlier                                   | Ref |
| MW865341 | Unassigned | Unassigned | Unassigned | Outlier                                   | Ref |
| MW879341 | Unassigned | Unassigned | Unassigned | Outlier                                   | Ref |
| MW924641 | Unassigned | Unassigned | Unassigned | Overlap (VC_1213/VC_1214)                 | Ref |
| MW927512 | Unassigned | Unassigned | Unassigned | Overlap (VC_726/VC_731)                   | Ref |
| MW927518 | Unassigned | Unassigned | Unassigned | Overlap (VC_726/VC_731)                   | Ref |
| MW929183 | Unassigned | Unassigned | Unassigned | Outlier                                   | Ref |
| MW960033 | Unassigned | Unassigned | Unassigned | Outlier                                   | Ref |
| MW960037 | Unassigned | Unassigned | Unassigned | Outlier                                   | Ref |
| MW960043 | Unassigned | Unassigned | Unassigned | Overlap (VC_76/VC_117)                    | Ref |
| MW965453 | Unassigned | Unassigned | Unassigned | Overlap (VC_72/VC_73)                     | Ref |
| MW980061 | Unassigned | Unassigned | Unassigned | Outlier                                   | Ref |
| MW980066 | Unassigned | Unassigned | Unassigned | Overlap (VC_806/VC_808)                   | Ref |
| MW980071 | Unassigned | Unassigned | Unassigned | Overlap (VC_806/VC_808)                   | Ref |
| MW980072 | Unassigned | Unassigned | Unassigned | Overlap (VC_806/VC_808)                   | Ref |
| MZ005679 | Unassigned | Unassigned | Unassigned | Overlap (VC_918/VC_919)                   | Ref |
| MZ005681 | Unassigned | Unassigned | Unassigned | Overlap (VC_1297/VC_1298)                 | Ref |
| MZ028627 | Unassigned | Unassigned | Unassigned | Outlier                                   | Ref |
| MZ073369 | Unassigned | Unassigned | Unassigned | Outlier                                   | Ref |
| MZ089730 | Unassigned | Unassigned | Unassigned | Outlier                                   | Ref |
| MZ089736 | Unassigned | Unassigned | Unassigned | Outlier                                   | Ref |
| MZ089737 | Unassigned | Unassigned | Unassigned | Overlap (VC_477/VC_629)                   | Ref |
| MZ089749 | Unassigned | Unassigned | Unassigned | Overlap (VC_1158/VC_1159/VC_1384)         | Ref |
| MZ089751 | Unassigned | Unassigned | Unassigned | Singleton                                 | Ref |
| MZ089753 | Unassigned | Unassigned | Unassigned | Overlap (VC_1158/VC_1159/VC_1384)         | Ref |
| MZ089754 | Unassigned | Unassigned | Unassigned | Overlap (VC_1158/VC_1159/VC_1384)         | Ref |
| MZ089755 | Unassigned | Unassigned | Unassigned | Overlap (VC_1158/VC_1159/VC_1384)         | Ref |
| MZ089757 | Unassigned | Unassigned | Unassigned | Overlap (VC_1158/VC_1159/VC_1162/VC_1384) | Ref |
| MZ089758 | Unassigned | Unassigned | Unassigned | Singleton                                 | Ref |
| MZ089759 | Unassigned | Unassigned | Unassigned | Overlap (VC_1158/VC_1159/VC_1384)         | Ref |
| MZ089760 | Unassigned | Unassigned | Unassigned | Singleton                                 | Ref |
| MZ089761 | Unassigned | Unassigned | Unassigned | Overlap (VC_1158/VC_1159/VC_1384)         | Ref |
| MZ089763 | Unassigned | Unassigned | Unassigned | Singleton                                 | Ref |
| MZ089764 | Unassigned | Unassigned | Unassigned | Outlier                                   | Ref |
| MZ089766 | Unassigned | Unassigned | Unassigned | Outlier                                   | Ref |
| MZ089779 | Unassigned | Unassigned | Unassigned | Overlap (VC_1176/VC_1366/VC_1381)         | Ref |
| MZ089781 | Unassigned | Unassigned | Unassigned | Singleton                                 | Ref |
| MZ089782 | Unassigned | Unassigned | Unassigned | Singleton                                 | Ref |
| MZ089784 | Unassigned | Unassigned | Unassigned | Outlier                                   | Ref |
| MZ089785 | Unassigned | Unassigned | Unassigned | Overlap (VC_1284/VC_1285)                 | Ref |
| MZ089793 | Unassigned | Unassigned | Unassigned | Outlier                                   | Ref |
| MZ089796 | Unassigned | Unassigned | Unassigned | Overlap (VC_1376/VC_1377/VC_1378)         | Ref |
| MZ089797 | Unassigned | Unassigned | Unassigned | Overlap (VC_1376/VC_1377/VC_1378)         | Ref |
| MZ089809 | Unassigned | Unassigned | Unassigned | Overlap (VC_1335/VC_1337)                 | Ref |
| MZ089810 | Unassigned | Unassigned | Unassigned | Singleton                                 | Ref |
| MZ099574 | Unassigned | Unassigned | Unassigned | Singleton                                 | Ref |
| MZ127829 | Unassigned | Unassigned | Unassigned | Outlier                                   | Ref |
| MZ150787 | Unassigned | Unassigned | Unassigned | Overlap (VC_1204/VC_1299)                 | Ref |



|          |            |            |            |                           |     |
|----------|------------|------------|------------|---------------------------|-----|
| MZ150789 | Unassigned | Unassigned | Unassigned | Outlier                   | Ref |
| MZ152915 | Unassigned | Unassigned | Unassigned | Overlap (VC_99/VC_101)    | Ref |
| MZ171369 | Unassigned | Unassigned | Unassigned | Outlier                   | Ref |
| MZ171379 | Unassigned | Unassigned | Unassigned | Overlap (VC_1297/VC_1298) | Ref |
| MZ188970 | Unassigned | Unassigned | Unassigned | Outlier                   | Ref |
| MZ220765 | Unassigned | Unassigned | Unassigned | Overlap (VC_123/VC_126)   | Ref |
| MZ274310 | Unassigned | Unassigned | Unassigned | Outlier                   | Ref |
| MZ322005 | Unassigned | Unassigned | Unassigned | Overlap (VC_234/VC_975)   | Ref |
| MZ326854 | Unassigned | Unassigned | Unassigned | Overlap (VC_76/VC_117)    | Ref |
| MZ326858 | Unassigned | Unassigned | Unassigned | Overlap (VC_76/VC_117)    | Ref |
| MZ326860 | Unassigned | Unassigned | Unassigned | Outlier                   | Ref |
| MZ326867 | Unassigned | Unassigned | Unassigned | Outlier                   | Ref |
| MZ333131 | Unassigned | Unassigned | Unassigned | Outlier                   | Ref |
| MZ333132 | Unassigned | Unassigned | Unassigned | Outlier                   | Ref |
| MZ333133 | Unassigned | Unassigned | Unassigned | Outlier                   | Ref |
| MZ333134 | Unassigned | Unassigned | Unassigned | Overlap (VC_762/VC_763)   | Ref |
| MZ333136 | Unassigned | Unassigned | Unassigned | Overlap (VC_762/VC_763)   | Ref |
| MZ33456  | Unassigned | Unassigned | Unassigned | Overlap (VC_274/VC_891)   | Ref |
| MZ33458  | Unassigned | Unassigned | Unassigned | Overlap (VC_274/VC_891)   | Ref |
| MZ34521  | Unassigned | Unassigned | Unassigned | Outlier                   | Ref |
| MZ34522  | Unassigned | Unassigned | Unassigned | Outlier                   | Ref |
| MZ34528  | Unassigned | Unassigned | Unassigned | Outlier                   | Ref |
| MZ343158 | Unassigned | Unassigned | Unassigned | Overlap (VC_542/VC_566)   | Ref |
| MZ348424 | Unassigned | Unassigned | Unassigned | Overlap (VC_293/VC_509)   | Ref |
| MZ355727 | Unassigned | Unassigned | Unassigned | Overlap (VC_1204/VC_1299) | Ref |
| MZ357096 | Unassigned | Unassigned | Unassigned | Outlier                   | Ref |
| MZ364230 | Unassigned | Unassigned | Unassigned | Overlap (VC_419/VC_1306)  | Ref |
| MZ364237 | Unassigned | Unassigned | Unassigned | Outlier                   | Ref |
| MZ364253 | Unassigned | Unassigned | Unassigned | Outlier                   | Ref |
| MZ364281 | Unassigned | Unassigned | Unassigned | Overlap (VC_1109/VC_1110) | Ref |
| MZ364287 | Unassigned | Unassigned | Unassigned | Outlier                   | Ref |
| MZ364290 | Unassigned | Unassigned | Unassigned | Singleton                 | Ref |
| MZ364292 | Unassigned | Unassigned | Unassigned | Outlier                   | Ref |
| MZ388555 | Unassigned | Unassigned | Unassigned | Overlap (VC_539/VC_568)   | Ref |
| MZ417316 | Unassigned | Unassigned | Unassigned | Overlap (VC_158/VC_159)   | Ref |
| MZ417317 | Unassigned | Unassigned | Unassigned | Overlap (VC_158/VC_159)   | Ref |
| MZ417318 | Unassigned | Unassigned | Unassigned | Overlap (VC_158/VC_159)   | Ref |
| MZ417324 | Unassigned | Unassigned | Unassigned | Overlap (VC_158/VC_159)   | Ref |
| MZ417326 | Unassigned | Unassigned | Unassigned | Overlap (VC_158/VC_159)   | Ref |
| MZ417333 | Unassigned | Unassigned | Unassigned | Overlap (VC_158/VC_159)   | Ref |
| MZ417334 | Unassigned | Unassigned | Unassigned | Overlap (VC_158/VC_159)   | Ref |
| MZ417335 | Unassigned | Unassigned | Unassigned | Overlap (VC_158/VC_159)   | Ref |
| MZ417338 | Unassigned | Unassigned | Unassigned | Overlap (VC_686/VC_710)   | Ref |
| MZ417341 | Unassigned | Unassigned | Unassigned | Overlap (VC_686/VC_710)   | Ref |
| MZ417342 | Unassigned | Unassigned | Unassigned | Overlap (VC_686/VC_710)   | Ref |
| MZ417349 | Unassigned | Unassigned | Unassigned | Overlap (VC_13/VC_29)     | Ref |
| MZ417351 | Unassigned | Unassigned | Unassigned | Overlap (VC_13/VC_29)     | Ref |
| MZ417352 | Unassigned | Unassigned | Unassigned | Overlap (VC_13/VC_29)     | Ref |
| MZ417353 | Unassigned | Unassigned | Unassigned | Overlap (VC_13/VC_29)     | Ref |
| MZ422438 | Unassigned | Unassigned | Unassigned | Outlier                   | Ref |
| MZ428230 | Unassigned | Unassigned | Unassigned | Outlier                   | Ref |
| MZ436628 | Unassigned | Unassigned | Unassigned | Outlier                   | Ref |
| MZ447858 | Unassigned | Unassigned | Unassigned | Outlier                   | Ref |
| MZ456038 | Unassigned | Unassigned | Unassigned | Overlap (VC_544/VC_574)   | Ref |
| MZ456039 | Unassigned | Unassigned | Unassigned | Overlap (VC_544/VC_574)   | Ref |
| MZ456352 | Unassigned | Unassigned | Unassigned | Outlier                   | Ref |
| MZ474490 | Unassigned | Unassigned | Unassigned | Singleton                 | Ref |
| MZ474491 | Unassigned | Unassigned | Unassigned | Outlier                   | Ref |
| MZ488273 | Unassigned | Unassigned | Unassigned | Overlap (VC_14/VC_15)     | Ref |
| MZ496292 | Unassigned | Unassigned | Unassigned | Outlier                   | Ref |
| MZ496294 | Unassigned | Unassigned | Unassigned | Outlier                   | Ref |
| MZ501264 | Unassigned | Unassigned | Unassigned | Overlap (VC_103/VC_108)   | Ref |
| MZ501271 | Unassigned | Unassigned | Unassigned | Outlier                   | Ref |
| MZ503612 | Unassigned | Unassigned | Unassigned | Outlier                   | Ref |
| MZ503613 | Unassigned | Unassigned | Unassigned | Overlap (VC_334/VC_556)   | Ref |
| MZ506873 | Unassigned | Unassigned | Unassigned | Outlier                   | Ref |
| MZ516527 | Unassigned | Unassigned | Unassigned | Outlier                   | Ref |
| MZ560703 | Unassigned | Unassigned | Unassigned | Outlier                   | Ref |
| MZ568829 | Unassigned | Unassigned | Unassigned | Outlier                   | Ref |
| MZ571829 | Unassigned | Unassigned | Unassigned | Overlap (VC_509/VC_510)   | Ref |
| MZ574429 | Unassigned | Unassigned | Unassigned | Overlap (VC_1012/VC_1015) | Ref |
| MZ574430 | Unassigned | Unassigned | Unassigned | Overlap (VC_1012/VC_1015) | Ref |
| MZ574431 | Unassigned | Unassigned | Unassigned | Overlap (VC_1012/VC_1015) | Ref |
| MZ574432 | Unassigned | Unassigned | Unassigned | Overlap (VC_1012/VC_1015) | Ref |
| MZ574433 | Unassigned | Unassigned | Unassigned | Overlap (VC_1012/VC_1015) | Ref |
| MZ612110 | Unassigned | Unassigned | Unassigned | Outlier                   | Ref |
| MZ614453 | Unassigned | Unassigned | Unassigned | Outlier                   | Ref |
| MZ622174 | Unassigned | Unassigned | Unassigned | Overlap (VC_539/VC_569)   | Ref |
| MZ622175 | Unassigned | Unassigned | Unassigned | Overlap (VC_1204/VC_1299) | Ref |
| MZ622713 | Unassigned | Unassigned | Unassigned | Overlap (VC_456/VC_457)   | Ref |
| MZ634347 | Unassigned | Unassigned | Unassigned | Overlap (VC_509/VC_510)   | Ref |



|          |            |            |            |                                |     |
|----------|------------|------------|------------|--------------------------------|-----|
| MZ634349 | Unassigned | Unassigned | Unassigned | Overlap (VC_509/VC_510)        | Ref |
| MZ643249 | Unassigned | Unassigned | Unassigned | Overlap (VC_965/VC_1091)       | Ref |
| MZ666130 | Unassigned | Unassigned | Unassigned | Overlap (VC_711/VC_712)        | Ref |
| MZ666938 | Unassigned | Unassigned | Unassigned | Outlier                        | Ref |
| MZ666939 | Unassigned | Unassigned | Unassigned | Singleton                      | Ref |
| MZ669808 | Unassigned | Unassigned | Unassigned | Outlier                        | Ref |
| MZ681514 | Unassigned | Unassigned | Unassigned | Outlier                        | Ref |
| MZ681515 | Unassigned | Unassigned | Unassigned | Overlap (VC_544/VC_574)        | Ref |
| MZ681517 | Unassigned | Unassigned | Unassigned | Overlap (VC_544/VC_574)        | Ref |
| MZ727332 | Unassigned | Unassigned | Unassigned | Singleton                      | Ref |
| MZ727334 | Unassigned | Unassigned | Unassigned | Outlier                        | Ref |
| MZ818790 | Unassigned | Unassigned | Unassigned | Singleton                      | Ref |
| MZ820084 | Unassigned | Unassigned | Unassigned | Overlap (VC_1204/VC_1299)      | Ref |
| MZ820086 | Unassigned | Unassigned | Unassigned | Overlap (VC_901/VC_902)        | Ref |
| MZ826699 | Unassigned | Unassigned | Unassigned | Overlap (VC_472/VC_605)        | Ref |
| MZ851152 | Unassigned | Unassigned | Unassigned | Overlap (VC_84/VC_86)          | Ref |
| MZ892993 | Unassigned | Unassigned | Unassigned | Outlier                        | Ref |
| MZ958746 | Unassigned | Unassigned | Unassigned | Overlap (VC_917/VC_919)        | Ref |
| MZ969012 | Unassigned | Unassigned | Unassigned | Outlier                        | Ref |
| MZ983385 | Unassigned | Unassigned | Unassigned | Outlier                        | Ref |
| OK018136 | Unassigned | Unassigned | Unassigned | Overlap (VC_76/VC_117)         | Ref |
| OK040780 | Unassigned | Unassigned | Unassigned | Overlap (VC_1074/VC_1078)      | Ref |
| OK040787 | Unassigned | Unassigned | Unassigned | Overlap (VC_1213/VC_1214)      | Ref |
| OK041467 | Unassigned | Unassigned | Unassigned | Outlier                        | Ref |
| OK042081 | Unassigned | Unassigned | Unassigned | Outlier                        | Ref |
| OK094664 | Unassigned | Unassigned | Unassigned | Overlap (VC_41/VC_836)         | Ref |
| OK149171 | Unassigned | Unassigned | Unassigned | Outlier                        | Ref |
| OK149216 | Unassigned | Unassigned | Unassigned | Outlier                        | Ref |
| OK169294 | Unassigned | Unassigned | Unassigned | Outlier                        | Ref |
| OK169295 | Unassigned | Unassigned | Unassigned | Outlier                        | Ref |
| OK181169 | Unassigned | Unassigned | Unassigned | Outlier                        | Ref |
| OK210076 | Unassigned | Unassigned | Unassigned | Overlap (VC_293/VC_297/VC_509) | Ref |
| OK247671 | Unassigned | Unassigned | Unassigned | Overlap (VC_563/VC_924)        | Ref |
| OK272475 | Unassigned | Unassigned | Unassigned | Outlier                        | Ref |
| OK349507 | Unassigned | Unassigned | Unassigned | Overlap (VC_822/VC_1000)       | Ref |
| OK490361 | Unassigned | Unassigned | Unassigned | Outlier                        | Ref |
| OK490419 | Unassigned | Unassigned | Unassigned | Outlier                        | Ref |
| OK490420 | Unassigned | Unassigned | Unassigned | Outlier                        | Ref |
| OK490421 | Unassigned | Unassigned | Unassigned | Outlier                        | Ref |
| OK490462 | Unassigned | Unassigned | Unassigned | Overlap (VC_61/VC_253)         | Ref |
| OK490465 | Unassigned | Unassigned | Unassigned | Overlap (VC_61/VC_253)         | Ref |
| OK490468 | Unassigned | Unassigned | Unassigned | Overlap (VC_61/VC_253)         | Ref |
| OK490471 | Unassigned | Unassigned | Unassigned | Overlap (VC_61/VC_253)         | Ref |
| OK490474 | Unassigned | Unassigned | Unassigned | Overlap (VC_61/VC_253)         | Ref |
| OK490494 | Unassigned | Unassigned | Unassigned | Overlap (VC_76/VC_117)         | Ref |
| OK500002 | Unassigned | Unassigned | Unassigned | Outlier                        | Ref |
| OK562670 | Unassigned | Unassigned | Unassigned | Outlier                        | Ref |
| OK570185 | Unassigned | Unassigned | Unassigned | Overlap (VC_469/VC_1068)       | Ref |
| OK570374 | Unassigned | Unassigned | Unassigned | Overlap (VC_293/VC_297/VC_509) | Ref |
| OK574338 | Unassigned | Unassigned | Unassigned | Overlap (VC_99/VC_101)         | Ref |
| OK597184 | Unassigned | Unassigned | Unassigned | Outlier                        | Ref |
| OK624832 | Unassigned | Unassigned | Unassigned | Outlier                        | Ref |
| OK632026 | Unassigned | Unassigned | Unassigned | Outlier                        | Ref |
| OK665841 | Unassigned | Unassigned | Unassigned | Outlier                        | Ref |
| OL348188 | Unassigned | Unassigned | Unassigned | Outlier                        | Ref |
| OL362271 | Unassigned | Unassigned | Unassigned | Overlap (VC_469/VC_1068)       | Ref |
| OL412002 | Unassigned | Unassigned | Unassigned | Outlier                        | Ref |
| OL449681 | Unassigned | Unassigned | Unassigned | Overlap (VC_472/VC_605)        | Ref |
| OL455886 | Unassigned | Unassigned | Unassigned | Overlap (VC_743/VC_745)        | Ref |
| OL455900 | Unassigned | Unassigned | Unassigned | Outlier                        | Ref |
| OL473597 | Unassigned | Unassigned | Unassigned | Outlier                        | Ref |
| OL512804 | Unassigned | Unassigned | Unassigned | Overlap (VC_34/VC_35)          | Ref |
| OL512807 | Unassigned | Unassigned | Unassigned | Outlier                        | Ref |
| OL539441 | Unassigned | Unassigned | Unassigned | Overlap (VC_1410/VC_1411)      | Ref |
| OL539457 | Unassigned | Unassigned | Unassigned | Overlap (VC_472/VC_605)        | Ref |
| OL539469 | Unassigned | Unassigned | Unassigned | Outlier                        | Ref |
| OL581612 | Unassigned | Unassigned | Unassigned | Overlap (VC_72/VC_75)          | Ref |
| OL617014 | Unassigned | Unassigned | Unassigned | Outlier                        | Ref |
| OL617015 | Unassigned | Unassigned | Unassigned | Singleton                      | Ref |
| OL617016 | Unassigned | Unassigned | Unassigned | Overlap (VC_1468/VC_1471)      | Ref |
| OL617017 | Unassigned | Unassigned | Unassigned | Overlap (VC_1468/VC_1471)      | Ref |
| OL617018 | Unassigned | Unassigned | Unassigned | Overlap (VC_1468/VC_1471)      | Ref |
| OL617019 | Unassigned | Unassigned | Unassigned | Overlap (VC_1468/VC_1471)      | Ref |
| OL617034 | Unassigned | Unassigned | Unassigned | Singleton                      | Ref |
| OL617038 | Unassigned | Unassigned | Unassigned | Outlier                        | Ref |
| OL617039 | Unassigned | Unassigned | Unassigned | Outlier                        | Ref |
| OL617040 | Unassigned | Unassigned | Unassigned | Overlap (VC_965/VC_1091)       | Ref |
| OL770309 | Unassigned | Unassigned | Unassigned | Overlap (VC_293/VC_509)        | Ref |
| OL774570 | Unassigned | Unassigned | Unassigned | Outlier                        | Ref |
| OL774867 | Unassigned | Unassigned | Unassigned | Overlap (VC_147/VC_148)        | Ref |
| OL774871 | Unassigned | Unassigned | Unassigned | Outlier                        | Ref |



|          |            |            |            |                                           |     |
|----------|------------|------------|------------|-------------------------------------------|-----|
| OL774874 | Unassigned | Unassigned | Unassigned | Outlier                                   | Ref |
| OL774875 | Unassigned | Unassigned | Unassigned | Outlier                                   | Ref |
| OL791267 | Unassigned | Unassigned | Unassigned | Outlier                                   | Ref |
| OL799250 | Unassigned | Unassigned | Unassigned | Outlier                                   | Ref |
| OL800604 | Unassigned | Unassigned | Unassigned | Outlier                                   | Ref |
| OL828290 | Unassigned | Unassigned | Unassigned | Overlap (VC_293/VC_297/VC_509)            | Ref |
| OL828291 | Unassigned | Unassigned | Unassigned | Overlap (VC_293/VC_297/VC_509)            | Ref |
| OL849997 | Unassigned | Unassigned | Unassigned | Overlap (VC_293/VC_297/VC_509)            | Ref |
| OL944604 | Unassigned | Unassigned | Unassigned | Outlier                                   | Ref |
| OL963531 | Unassigned | Unassigned | Unassigned | Singleton                                 | Ref |
| OL963532 | Unassigned | Unassigned | Unassigned | Singleton                                 | Ref |
| OM046624 | Unassigned | Unassigned | Unassigned | Outlier                                   | Ref |
| OM112209 | Unassigned | Unassigned | Unassigned | Outlier                                   | Ref |
| OM112210 | Unassigned | Unassigned | Unassigned | Outlier                                   | Ref |
| OM158235 | Unassigned | Unassigned | Unassigned | Outlier                                   | Ref |
| OM334891 | Unassigned | Unassigned | Unassigned | Outlier                                   | Ref |
| OM373548 | Unassigned | Unassigned | Unassigned | Outlier                                   | Ref |
| OM373549 | Unassigned | Unassigned | Unassigned | Overlap (VC_686/VC_710)                   | Ref |
| OM373559 | Unassigned | Unassigned | Unassigned | Outlier                                   | Ref |
| OM373560 | Unassigned | Unassigned | Unassigned | Overlap (VC_99/VC_101)                    | Ref |
| OM416780 | Unassigned | Unassigned | Unassigned | Outlier                                   | Ref |
| OM418631 | Unassigned | Unassigned | Unassigned | Outlier                                   | Ref |
| OM522998 | Unassigned | Unassigned | Unassigned | Singleton                                 | Ref |
| OM523000 | Unassigned | Unassigned | Unassigned | Overlap (VC_414/VC_1027/VC_1126)          | Ref |
| OM630587 | Unassigned | Unassigned | Unassigned | Overlap (VC_72/VC_75)                     | Ref |
| OM630589 | Unassigned | Unassigned | Unassigned | Overlap (VC_72/VC_75)                     | Ref |
| OM638088 | Unassigned | Unassigned | Unassigned | Outlier                                   | Ref |
| OM654374 | Unassigned | Unassigned | Unassigned | Outlier                                   | Ref |
| OM654375 | Unassigned | Unassigned | Unassigned | Outlier                                   | Ref |
| OM654376 | Unassigned | Unassigned | Unassigned | Outlier                                   | Ref |
| OM654377 | Unassigned | Unassigned | Unassigned | Outlier                                   | Ref |
| OM654378 | Unassigned | Unassigned | Unassigned | Outlier                                   | Ref |
| OM681334 | Unassigned | Unassigned | Unassigned | Outlier                                   | Ref |
| OM716000 | Unassigned | Unassigned | Unassigned | Singleton                                 | Ref |
| OM716001 | Unassigned | Unassigned | Unassigned | Singleton                                 | Ref |
| OM716002 | Unassigned | Unassigned | Unassigned | Singleton                                 | Ref |
| OM716005 | Unassigned | Unassigned | Unassigned | Overlap (VC_84/VC_86)                     | Ref |
| OM735461 | Unassigned | Unassigned | Unassigned | Outlier                                   | Ref |
| OM735686 | Unassigned | Unassigned | Unassigned | Overlap (VC_76/VC_117)                    | Ref |
| OM735687 | Unassigned | Unassigned | Unassigned | Overlap (VC_445/VC_758/VC_759)            | Ref |
| OM735688 | Unassigned | Unassigned | Unassigned | Overlap (VC_76/VC_117)                    | Ref |
| OM735689 | Unassigned | Unassigned | Unassigned | Overlap (VC_445/VC_758/VC_759)            | Ref |
| OM869493 | Unassigned | Unassigned | Unassigned | Singleton                                 | Ref |
| OM869495 | Unassigned | Unassigned | Unassigned | Singleton                                 | Ref |
| OM869496 | Unassigned | Unassigned | Unassigned | Singleton                                 | Ref |
| OM869498 | Unassigned | Unassigned | Unassigned | Overlap (VC_1370/VC_1372)                 | Ref |
| OM869501 | Unassigned | Unassigned | Unassigned | Outlier                                   | Ref |
| OM869503 | Unassigned | Unassigned | Unassigned | Overlap (VC_1162/VC_1164)                 | Ref |
| OM869504 | Unassigned | Unassigned | Unassigned | Singleton                                 | Ref |
| OM869506 | Unassigned | Unassigned | Unassigned | Overlap (VC_1164/VC_1384)                 | Ref |
| OM869508 | Unassigned | Unassigned | Unassigned | Overlap (VC_1164/VC_1384)                 | Ref |
| OM869509 | Unassigned | Unassigned | Unassigned | Overlap (VC_1095/VC_1096)                 | Ref |
| OM869511 | Unassigned | Unassigned | Unassigned | Singleton                                 | Ref |
| OM869515 | Unassigned | Unassigned | Unassigned | Overlap (VC_1372/VC_1542)                 | Ref |
| OM869518 | Unassigned | Unassigned | Unassigned | Overlap (VC_1176/VC_1366)                 | Ref |
| OM869520 | Unassigned | Unassigned | Unassigned | Singleton                                 | Ref |
| OM869522 | Unassigned | Unassigned | Unassigned | Overlap (VC_1097/VC_1103)                 | Ref |
| OM869523 | Unassigned | Unassigned | Unassigned | Outlier                                   | Ref |
| OM869530 | Unassigned | Unassigned | Unassigned | Outlier                                   | Ref |
| OM869539 | Unassigned | Unassigned | Unassigned | Singleton                                 | Ref |
| OM869541 | Unassigned | Unassigned | Unassigned | Outlier                                   | Ref |
| OM869554 | Unassigned | Unassigned | Unassigned | Overlap (VC_1173/VC_1177)                 | Ref |
| OM869555 | Unassigned | Unassigned | Unassigned | Overlap (VC_1284/VC_1285)                 | Ref |
| OM869566 | Unassigned | Unassigned | Unassigned | Overlap (VC_1377/VC_1378)                 | Ref |
| OM869567 | Unassigned | Unassigned | Unassigned | Outlier                                   | Ref |
| OM869568 | Unassigned | Unassigned | Unassigned | Overlap (VC_1376/VC_1377/VC_1378)         | Ref |
| OM869575 | Unassigned | Unassigned | Unassigned | Outlier                                   | Ref |
| OM869579 | Unassigned | Unassigned | Unassigned | Singleton                                 | Ref |
| OM869580 | Unassigned | Unassigned | Unassigned | Singleton                                 | Ref |
| OM869585 | Unassigned | Unassigned | Unassigned | Singleton                                 | Ref |
| OM869586 | Unassigned | Unassigned | Unassigned | Singleton                                 | Ref |
| OM869591 | Unassigned | Unassigned | Unassigned | Singleton                                 | Ref |
| OM869603 | Unassigned | Unassigned | Unassigned | Overlap (VC_1164/VC_1384)                 | Ref |
| OM869605 | Unassigned | Unassigned | Unassigned | Outlier                                   | Ref |
| OM869607 | Unassigned | Unassigned | Unassigned | Singleton                                 | Ref |
| OM869608 | Unassigned | Unassigned | Unassigned | Singleton                                 | Ref |
| OM869609 | Unassigned | Unassigned | Unassigned | Singleton                                 | Ref |
| OM869611 | Unassigned | Unassigned | Unassigned | Singleton                                 | Ref |
| OM869612 | Unassigned | Unassigned | Unassigned | Overlap (VC_1336/VC_1359)                 | Ref |
| OM869625 | Unassigned | Unassigned | Unassigned | Singleton                                 | Ref |
| OM869627 | Unassigned | Unassigned | Unassigned | Overlap (VC_1158/VC_1159/VC_1161/VC_1384) | Ref |



|          |            |            |            |                                       |     |
|----------|------------|------------|------------|---------------------------------------|-----|
| OM869628 | Unassigned | Unassigned | Unassigned | Overlap (VC_1158/VC_1159/VC_1384)     | Ref |
| OM869629 | Unassigned | Unassigned | Unassigned | Overlap (VC_1158/VC_1159/VC_1384)     | Ref |
| OM869630 | Unassigned | Unassigned | Unassigned | Singleton                             | Ref |
| OM869636 | Unassigned | Unassigned | Unassigned | Singleton                             | Ref |
| OM869647 | Unassigned | Unassigned | Unassigned | Singleton                             | Ref |
| OM869649 | Unassigned | Unassigned | Unassigned | Outlier                               | Ref |
| OM869652 | Unassigned | Unassigned | Unassigned | Overlap (VC_1376/VC_1377)             | Ref |
| OM869656 | Unassigned | Unassigned | Unassigned | Singleton                             | Ref |
| OM869660 | Unassigned | Unassigned | Unassigned | Outlier                               | Ref |
| OM869661 | Unassigned | Unassigned | Unassigned | Outlier                               | Ref |
| OM869662 | Unassigned | Unassigned | Unassigned | Outlier                               | Ref |
| OM869665 | Unassigned | Unassigned | Unassigned | Outlier                               | Ref |
| OM869667 | Unassigned | Unassigned | Unassigned | Outlier                               | Ref |
| OM869677 | Unassigned | Unassigned | Unassigned | Outlier                               | Ref |
| OM869678 | Unassigned | Unassigned | Unassigned | Singleton                             | Ref |
| OM869680 | Unassigned | Unassigned | Unassigned | Singleton                             | Ref |
| OM869681 | Unassigned | Unassigned | Unassigned | Singleton                             | Ref |
| OM869682 | Unassigned | Unassigned | Unassigned | Outlier                               | Ref |
| OM869683 | Unassigned | Unassigned | Unassigned | Overlap (VC_1376/VC_1377)             | Ref |
| OM869685 | Unassigned | Unassigned | Unassigned | Outlier                               | Ref |
| OM869690 | Unassigned | Unassigned | Unassigned | Outlier                               | Ref |
| OM869691 | Unassigned | Unassigned | Unassigned | Overlap (VC_1370/VC_1372)             | Ref |
| OM869692 | Unassigned | Unassigned | Unassigned | Singleton                             | Ref |
| OM869693 | Unassigned | Unassigned | Unassigned | Overlap (VC_1372/VC_1542)             | Ref |
| OM869694 | Unassigned | Unassigned | Unassigned | Overlap (VC_1164/VC_1384)             | Ref |
| OM869695 | Unassigned | Unassigned | Unassigned | Singleton                             | Ref |
| OM869705 | Unassigned | Unassigned | Unassigned | Singleton                             | Ref |
| OM869710 | Unassigned | Unassigned | Unassigned | Singleton                             | Ref |
| OM869714 | Unassigned | Unassigned | Unassigned | Outlier                               | Ref |
| OM869715 | Unassigned | Unassigned | Unassigned | Singleton                             | Ref |
| OM912978 | Unassigned | Unassigned | Unassigned | Overlap (VC_293/VC_297/VC_509)        | Ref |
| OM912979 | Unassigned | Unassigned | Unassigned | Outlier                               | Ref |
| OM913583 | Unassigned | Unassigned | Unassigned | Overlap (VC_245/VC_247)               | Ref |
| OM913599 | Unassigned | Unassigned | Unassigned | Overlap (VC_469/VC_1068)              | Ref |
| OM962999 | Unassigned | Unassigned | Unassigned | Overlap (VC_72/VC_75)                 | Ref |
| ON004963 | Unassigned | Unassigned | Unassigned | Overlap (VC_865/VC_866)               | Ref |
| ON014756 | Unassigned | Unassigned | Unassigned | Outlier                               | Ref |
| ON032529 | Unassigned | Unassigned | Unassigned | Overlap (VC_39/VC_62)                 | Ref |
| ON041214 | Unassigned | Unassigned | Unassigned | Outlier                               | Ref |
| ON062054 | Unassigned | Unassigned | Unassigned | Overlap (VC_472/VC_605)               | Ref |
| ON067806 | Unassigned | Unassigned | Unassigned | Singleton                             | Ref |
| ON075462 | Unassigned | Unassigned | Unassigned | Overlap (VC_936/VC_938)               | Ref |
| ON075799 | Unassigned | Unassigned | Unassigned | Overlap (VC_602/VC_875)               | Ref |
| ON081336 | Unassigned | Unassigned | Unassigned | Overlap (VC_901/VC_902)               | Ref |
| ON087563 | Unassigned | Unassigned | Unassigned | Outlier                               | Ref |
| ON108641 | Unassigned | Unassigned | Unassigned | Overlap (VC_1213/VC_1214)             | Ref |
| ON113345 | Unassigned | Unassigned | Unassigned | Overlap (VC_14/VC_15)                 | Ref |
| ON146294 | Unassigned | Unassigned | Unassigned | Outlier                               | Ref |
| ON170044 | Unassigned | Unassigned | Unassigned | Outlier                               | Ref |
| ON170045 | Unassigned | Unassigned | Unassigned | Outlier                               | Ref |
| ON170047 | Unassigned | Unassigned | Unassigned | Outlier                               | Ref |
| ON170048 | Unassigned | Unassigned | Unassigned | Outlier                               | Ref |
| ON170063 | Unassigned | Unassigned | Unassigned | Outlier                               | Ref |
| ON170065 | Unassigned | Unassigned | Unassigned | Outlier                               | Ref |
| ON170085 | Unassigned | Unassigned | Unassigned | Outlier                               | Ref |
| ON170138 | Unassigned | Unassigned | Unassigned | Outlier                               | Ref |
| ON170140 | Unassigned | Unassigned | Unassigned | Outlier                               | Ref |
| ON170177 | Unassigned | Unassigned | Unassigned | Outlier                               | Ref |
| ON170183 | Unassigned | Unassigned | Unassigned | Outlier                               | Ref |
| ON170191 | Unassigned | Unassigned | Unassigned | Overlap (VC_188/VC_191/VC_195/VC_257) | Ref |
| ON170255 | Unassigned | Unassigned | Unassigned | Outlier                               | Ref |
| ON170256 | Unassigned | Unassigned | Unassigned | Outlier                               | Ref |
| ON170259 | Unassigned | Unassigned | Unassigned | Outlier                               | Ref |
| ON170310 | Unassigned | Unassigned | Unassigned | Outlier                               | Ref |
| ON170342 | Unassigned | Unassigned | Unassigned | Overlap (VC_188/VC_191/VC_195/VC_257) | Ref |
| ON170345 | Unassigned | Unassigned | Unassigned | Outlier                               | Ref |
| ON191531 | Unassigned | Unassigned | Unassigned | Outlier                               | Ref |
| ON191532 | Unassigned | Unassigned | Unassigned | Outlier                               | Ref |
| ON208831 | Unassigned | Unassigned | Unassigned | Overlap (VC_1204/VC_1299)             | Ref |
| ON212265 | Unassigned | Unassigned | Unassigned | Overlap (VC_293/VC_297/VC_509)        | Ref |
| ON212267 | Unassigned | Unassigned | Unassigned | Overlap (VC_293/VC_297/VC_509)        | Ref |
| ON245412 | Unassigned | Unassigned | Unassigned | Outlier                               | Ref |
| ON260830 | Unassigned | Unassigned | Unassigned | Overlap (VC_544/VC_574)               | Ref |
| ON287368 | Unassigned | Unassigned | Unassigned | Outlier                               | Ref |
| ON287371 | Unassigned | Unassigned | Unassigned | Outlier                               | Ref |
| ON325435 | Unassigned | Unassigned | Unassigned | Overlap (VC_14/VC_110)                | Ref |
| ON381767 | Unassigned | Unassigned | Unassigned | Overlap (VC_762/VC_763)               | Ref |
| ON392163 | Unassigned | Unassigned | Unassigned | Overlap (VC_1297/VC_1298)             | Ref |
| ON392164 | Unassigned | Unassigned | Unassigned | Overlap (VC_743/VC_745)               | Ref |
| ON392165 | Unassigned | Unassigned | Unassigned | Overlap (VC_743/VC_745)               | Ref |
| ON392167 | Unassigned | Unassigned | Unassigned | Outlier                               | Ref |



|          |            |            |            |                                   |     |
|----------|------------|------------|------------|-----------------------------------|-----|
| ON456341 | Unassigned | Unassigned | Unassigned | Overlap (VC_743/VC_745)           | Ref |
| ON456347 | Unassigned | Unassigned | Unassigned | Outlier                           | Ref |
| ON456355 | Unassigned | Unassigned | Unassigned | Overlap (VC_544/VC_574)           | Ref |
| ON470580 | Unassigned | Unassigned | Unassigned | Outlier                           | Ref |
| ON470581 | Unassigned | Unassigned | Unassigned | Overlap (VC_39/VC_62)             | Ref |
| ON470583 | Unassigned | Unassigned | Unassigned | Outlier                           | Ref |
| ON470585 | Unassigned | Unassigned | Unassigned | Overlap (VC_39/VC_62)             | Ref |
| ON470586 | Unassigned | Unassigned | Unassigned | Outlier                           | Ref |
| ON470587 | Unassigned | Unassigned | Unassigned | Overlap (VC_39/VC_62)             | Ref |
| ON470591 | Unassigned | Unassigned | Unassigned | Outlier                           | Ref |
| ON470595 | Unassigned | Unassigned | Unassigned | Overlap (VC_39/VC_62)             | Ref |
| ON470599 | Unassigned | Unassigned | Unassigned | Outlier                           | Ref |
| ON470600 | Unassigned | Unassigned | Unassigned | Outlier                           | Ref |
| ON470602 | Unassigned | Unassigned | Unassigned | Overlap (VC_39/VC_62)             | Ref |
| ON470607 | Unassigned | Unassigned | Unassigned | Outlier                           | Ref |
| ON470608 | Unassigned | Unassigned | Unassigned | Overlap (VC_252/VC_253)           | Ref |
| ON470609 | Unassigned | Unassigned | Unassigned | Overlap (VC_39/VC_62)             | Ref |
| ON470611 | Unassigned | Unassigned | Unassigned | Outlier                           | Ref |
| ON470612 | Unassigned | Unassigned | Unassigned | Outlier                           | Ref |
| ON470614 | Unassigned | Unassigned | Unassigned | Overlap (VC_39/VC_62)             | Ref |
| ON470616 | Unassigned | Unassigned | Unassigned | Overlap (VC_39/VC_62)             | Ref |
| ON470621 | Unassigned | Unassigned | Unassigned | Outlier                           | Ref |
| ON470622 | Unassigned | Unassigned | Unassigned | Overlap (VC_252/VC_253)           | Ref |
| ON526983 | Unassigned | Unassigned | Unassigned | Overlap (VC_1017/VC_1018)         | Ref |
| ON529861 | Unassigned | Unassigned | Unassigned | Outlier                           | Ref |
| ON550478 | Unassigned | Unassigned | Unassigned | Overlap (VC_14/VC_110)            | Ref |
| ON585039 | Unassigned | Unassigned | Unassigned | Overlap (VC_293/VC_297/VC_509)    | Ref |
| ON602731 | Unassigned | Unassigned | Unassigned | Overlap (VC_477/VC_629)           | Ref |
| ON602745 | Unassigned | Unassigned | Unassigned | Outlier                           | Ref |
| ON604651 | Unassigned | Unassigned | Unassigned | Overlap (VC_84/VC_86)             | Ref |
| ON615601 | Unassigned | Unassigned | Unassigned | Outlier                           | Ref |
| ON623732 | Unassigned | Unassigned | Unassigned | Overlap (VC_612/VC_617)           | Ref |
| ON624112 | Unassigned | Unassigned | Unassigned | Overlap (VC_469/VC_1068)          | Ref |
| ON645340 | Unassigned | Unassigned | Unassigned | Overlap (VC_1213/VC_1214)         | Ref |
| ON721384 | Unassigned | Unassigned | Unassigned | Overlap (VC_1044/VC_1047/VC_1488) | Ref |
| ON721385 | Unassigned | Unassigned | Unassigned | Overlap (VC_1044/VC_1047/VC_1488) | Ref |
| ON724010 | Unassigned | Unassigned | Unassigned | Overlap (VC_762/VC_763)           | Ref |
| ON755180 | Unassigned | Unassigned | Unassigned | Outlier                           | Ref |
| ON778006 | Unassigned | Unassigned | Unassigned | Overlap (VC_183/VC_303)           | Ref |
| ON854455 | Unassigned | Unassigned | Unassigned | Outlier                           | Ref |
| ON872163 | Unassigned | Unassigned | Unassigned | Outlier                           | Ref |
| ON886116 | Unassigned | Unassigned | Unassigned | Outlier                           | Ref |
| ON950054 | Unassigned | Unassigned | Unassigned | Outlier                           | Ref |
| ON970570 | Unassigned | Unassigned | Unassigned | Overlap (VC_1204/VC_1299)         | Ref |
| ON970615 | Unassigned | Unassigned | Unassigned | Outlier                           | Ref |
| ON970617 | Unassigned | Unassigned | Unassigned | Overlap (VC_901/VC_902)           | Ref |
| ON981384 | Unassigned | Unassigned | Unassigned | Outlier                           | Ref |
| OP012469 | Unassigned | Unassigned | Unassigned | Outlier                           | Ref |
| OP018674 | Unassigned | Unassigned | Unassigned | Overlap (VC_711/VC_712)           | Ref |
| OP066531 | Unassigned | Unassigned | Unassigned | Outlier                           | Ref |
| OP068330 | Unassigned | Unassigned | Unassigned | Overlap (VC_1204/VC_1299)         | Ref |
| OP079919 | Unassigned | Unassigned | Unassigned | Overlap (VC_456/VC_457)           | Ref |
| OP087422 | Unassigned | Unassigned | Unassigned | Overlap (VC_72/VC_73)             | Ref |
| OP087423 | Unassigned | Unassigned | Unassigned | Overlap (VC_72/VC_73)             | Ref |
| OP120783 | Unassigned | Unassigned | Unassigned | Overlap (VC_603/VC_605)           | Ref |
| OP123707 | Unassigned | Unassigned | Unassigned | Overlap (VC_456/VC_457)           | Ref |
| OP125547 | Unassigned | Unassigned | Unassigned | Outlier                           | Ref |
| OP142323 | Unassigned | Unassigned | Unassigned | Overlap (VC_14/VC_110)            | Ref |
| OP172869 | Unassigned | Unassigned | Unassigned | Overlap (VC_1205/VC_1206)         | Ref |
| OP172871 | Unassigned | Unassigned | Unassigned | Overlap (VC_1213/VC_1214)         | Ref |
| OP209175 | Unassigned | Unassigned | Unassigned | Outlier                           | Ref |
| OP209177 | Unassigned | Unassigned | Unassigned | Singleton                         | Ref |
| OP209178 | Unassigned | Unassigned | Unassigned | Outlier                           | Ref |
| OP296522 | Unassigned | Unassigned | Unassigned | Outlier                           | Ref |
| OP297179 | Unassigned | Unassigned | Unassigned | Overlap (VC_99/VC_101)            | Ref |
| OP297530 | Unassigned | Unassigned | Unassigned | Overlap (VC_245/VC_247)           | Ref |
| OP297545 | Unassigned | Unassigned | Unassigned | Outlier                           | Ref |
| OP323071 | Unassigned | Unassigned | Unassigned | Overlap (VC_263/VC_268)           | Ref |
| OP323072 | Unassigned | Unassigned | Unassigned | Overlap (VC_263/VC_268)           | Ref |
| OP323073 | Unassigned | Unassigned | Unassigned | Overlap (VC_263/VC_268)           | Ref |
| OP323074 | Unassigned | Unassigned | Unassigned | Overlap (VC_263/VC_268)           | Ref |
| OP323075 | Unassigned | Unassigned | Unassigned | Overlap (VC_263/VC_268)           | Ref |
| OP323076 | Unassigned | Unassigned | Unassigned | Overlap (VC_263/VC_268)           | Ref |
| OP323077 | Unassigned | Unassigned | Unassigned | Overlap (VC_263/VC_268)           | Ref |
| OP328421 | Unassigned | Unassigned | Unassigned | Outlier                           | Ref |
| OP341623 | Unassigned | Unassigned | Unassigned | Outlier                           | Ref |
| OP341629 | Unassigned | Unassigned | Unassigned | Overlap (VC_140/VC_346)           | Ref |
| OP380492 | Unassigned | Unassigned | Unassigned | Overlap (VC_89/VC_90)             | Ref |
| OP413827 | Unassigned | Unassigned | Unassigned | Overlap (VC_865/VC_866)           | Ref |
| OP413831 | Unassigned | Unassigned | Unassigned | Overlap (VC_865/VC_866)           | Ref |
| OP433492 | Unassigned | Unassigned | Unassigned | Overlap (VC_843/VC_846)           | Ref |



|               |            |            |            |                                   |      |
|---------------|------------|------------|------------|-----------------------------------|------|
| OP434446      | Unassigned | Unassigned | Unassigned | Outlier                           | Ref  |
| OP434449      | Unassigned | Unassigned | Unassigned | Outlier                           | Ref  |
| OP434518      | Unassigned | Unassigned | Unassigned | Outlier                           | Ref  |
| OP481051      | Unassigned | Unassigned | Unassigned | Outlier                           | Ref  |
| OP490597      | Unassigned | Unassigned | Unassigned | Overlap (VC_83/VC_637)            | Ref  |
| OP503989      | Unassigned | Unassigned | Unassigned | Overlap (VC_727/VC_731)           | Ref  |
| OP503990      | Unassigned | Unassigned | Unassigned | Overlap (VC_727/VC_731)           | Ref  |
| OP503991      | Unassigned | Unassigned | Unassigned | Overlap (VC_727/VC_731)           | Ref  |
| OP535465      | Unassigned | Unassigned | Unassigned | Outlier                           | Ref  |
| OP549880      | Unassigned | Unassigned | Unassigned | Overlap (VC_1550/VC_1551)         | Ref  |
| OP559179      | Unassigned | Unassigned | Unassigned | Outlier                           | Ref  |
| OP617331      | Unassigned | Unassigned | Unassigned | Overlap (VC_293/VC_509)           | Ref  |
| OP617741      | Unassigned | Unassigned | Unassigned | Outlier                           | Ref  |
| OP650935      | Unassigned | Unassigned | Unassigned | Outlier                           | Ref  |
| OP650936      | Unassigned | Unassigned | Unassigned | Overlap (VC_41/VC_836)            | Ref  |
| OP714164      | Unassigned | Unassigned | Unassigned | Outlier                           | Ref  |
| OU343168      | Unassigned | Unassigned | Unassigned | Overlap (VC_456/VC_457)           | Ref  |
| OU509537      | Unassigned | Unassigned | Unassigned | Overlap (VC_612/VC_617)           | Ref  |
| OV696617      | Unassigned | Unassigned | Unassigned | Overlap (VC_762/VC_763)           | Ref  |
| OV696620      | Unassigned | Unassigned | Unassigned | Overlap (VC_717/VC_719)           | Ref  |
| OV696622      | Unassigned | Unassigned | Unassigned | Outlier                           | Ref  |
| OW991346      | Unassigned | Unassigned | Unassigned | Overlap (VC_84/VC_86)             | Ref  |
| OX001577      | Unassigned | Unassigned | Unassigned | Overlap (VC_84/VC_86)             | Ref  |
| OX090892      | Unassigned | Unassigned | Unassigned | Overlap (VC_84/VC_86)             | Ref  |
| OX241423      | Unassigned | Unassigned | Unassigned | Overlap (VC_512/VC_513)           | Ref  |
| OX241442      | Unassigned | Unassigned | Unassigned | Overlap (VC_512/VC_513)           | Ref  |
| OX241443      | Unassigned | Unassigned | Unassigned | Outlier                           | Ref  |
| OX241444      | Unassigned | Unassigned | Unassigned | Overlap (VC_512/VC_513)           | Ref  |
| OX241464      | Unassigned | Unassigned | Unassigned | Overlap (VC_512/VC_513)           | Ref  |
| OX241555      | Unassigned | Unassigned | Unassigned | Overlap (VC_1082/VC_1083)         | Ref  |
| OX241576      | Unassigned | Unassigned | Unassigned | Overlap (VC_512/VC_513)           | Ref  |
| OX335406      | Unassigned | Unassigned | Unassigned | Overlap (VC_865/VC_866)           | Ref  |
| PMULEFTEN     | Unassigned | Unassigned | Unassigned | Outlier                           | Ref  |
| S10_vf_113489 | Unassigned | Unassigned | Unassigned | Overlap (VC_1553/VC_1555)         | SHHC |
| S10_vf_46328  | Unassigned | Unassigned | Unassigned | Overlap (VC_627/VC_1564)          | SHHC |
| S10_vf_47170  | Unassigned | Unassigned | Unassigned | Outlier                           | SHHC |
| S10_vf_57705  | Unassigned | Unassigned | Unassigned | Overlap (VC_1259/VC_1563)         | SHHC |
| S10_vf_62230  | Unassigned | Unassigned | Unassigned | Outlier                           | SHHC |
| S10_vs_106834 | Unassigned | Unassigned | Unassigned | Outlier                           | SHHC |
| S10_vs_119208 | Unassigned | Unassigned | Unassigned | Overlap (VC_856/VC_857)           | SHHC |
| S10_vs_120570 | Unassigned | Unassigned | Unassigned | Overlap (VC_334/VC_1572)          | SHHC |
| S10_vs_20400  | Unassigned | Unassigned | Unassigned | Overlap (VC_841/VC_1481)          | SHHC |
| S10_vs_37694  | Unassigned | Unassigned | Unassigned | Outlier                           | SHHC |
| S10_vs_46819  | Unassigned | Unassigned | Unassigned | Overlap (VC_558/VC_559)           | SHHC |
| S11_vf_104034 | Unassigned | Unassigned | Unassigned | Overlap (VC_841/VC_1481)          | ME   |
| S11_vf_104046 | Unassigned | Unassigned | Unassigned | Singleton                         | ME   |
| S11_vf_104062 | Unassigned | Unassigned | Unassigned | Overlap (VC_1044/VC_1047/VC_1488) | ME   |
| S11_vf_33117  | Unassigned | Unassigned | Unassigned | Overlap (VC_730/VC_1293)          | ME   |
| S11_vf_33433  | Unassigned | Unassigned | Unassigned | Outlier                           | ME   |
| S11_vf_34008  | Unassigned | Unassigned | Unassigned | Overlap (VC_627/VC_1564)          | ME   |
| S11_vf_58587  | Unassigned | Unassigned | Unassigned | Overlap (VC_1259/VC_1261)         | ME   |
| S11_vf_89309  | Unassigned | Unassigned | Unassigned | Singleton                         | ME   |
| S11_vf_99751  | Unassigned | Unassigned | Unassigned | Outlier                           | ME   |
| S11_vs_104036 | Unassigned | Unassigned | Unassigned | Overlap (VC_856/VC_857)           | ME   |
| S11_vs_104037 | Unassigned | Unassigned | Unassigned | Singleton                         | ME   |
| S11_vs_104042 | Unassigned | Unassigned | Unassigned | Overlap (VC_760/VC_888)           | ME   |
| S11_vs_104049 | Unassigned | Unassigned | Unassigned | Overlap (VC_155/VC_661)           | ME   |
| S11_vs_104069 | Unassigned | Unassigned | Unassigned | Overlap (VC_354/VC_1271)          | ME   |
| S11_vs_13652  | Unassigned | Unassigned | Unassigned | Overlap (VC_326/VC_644)           | ME   |
| S11_vs_20225  | Unassigned | Unassigned | Unassigned | Outlier                           | ME   |
| S11_vs_3006   | Unassigned | Unassigned | Unassigned | Overlap (VC_326/VC_644)           | ME   |
| S11_vs_36748  | Unassigned | Unassigned | Unassigned | Overlap (VC_1566/VC_1581)         | ME   |
| S11_vs_38860  | Unassigned | Unassigned | Unassigned | Overlap (VC_333/VC_645)           | ME   |
| S11_vs_45658  | Unassigned | Unassigned | Unassigned | Overlap (VC_1530/VC_1560)         | ME   |
| S11_vs_48109  | Unassigned | Unassigned | Unassigned | Outlier                           | ME   |
| S11_vs_49071  | Unassigned | Unassigned | Unassigned | Overlap (VC_1255/VC_1558)         | ME   |
| S11_vs_53675  | Unassigned | Unassigned | Unassigned | Outlier                           | ME   |
| S11_vs_55144  | Unassigned | Unassigned | Unassigned | Outlier                           | ME   |
| S11_vs_56762  | Unassigned | Unassigned | Unassigned | Outlier                           | ME   |
| S11_vs_67573  | Unassigned | Unassigned | Unassigned | Outlier                           | ME   |
| S11_vs_68348  | Unassigned | Unassigned | Unassigned | Outlier                           | ME   |
| S11_vs_6878   | Unassigned | Unassigned | Unassigned | Outlier                           | ME   |
| S11_vs_79831  | Unassigned | Unassigned | Unassigned | Outlier                           | ME   |
| S11_vs_82331  | Unassigned | Unassigned | Unassigned | Outlier                           | ME   |
| S11_vs_82368  | Unassigned | Unassigned | Unassigned | Overlap (VC_627/VC_1564)          | ME   |
| S11_vs_83666  | Unassigned | Unassigned | Unassigned | Overlap (VC_641/VC_1595)          | ME   |
| S11_vs_89911  | Unassigned | Unassigned | Unassigned | Outlier                           | ME   |
| S12_vf_105542 | Unassigned | Unassigned | Unassigned | Outlier                           | SHHC |
| S12_vf_145044 | Unassigned | Unassigned | Unassigned | Overlap (VC_1080/VC_1510)         | SHHC |
| S12_vf_16374  | Unassigned | Unassigned | Unassigned | Overlap (VC_952/VC_1529)          | SHHC |
| S12_vf_170614 | Unassigned | Unassigned | Unassigned | Overlap (VC_1259/VC_1261)         | SHHC |



|               |            |            |            |                                  |      |
|---------------|------------|------------|------------|----------------------------------|------|
| S12_vf_173666 | Unassigned | Unassigned | Unassigned | Overlap (VC_725/VC_1221)         | SHHC |
| S12_vf_187941 | Unassigned | Unassigned | Unassigned | Singleton                        | SHHC |
| S12_vf_188827 | Unassigned | Unassigned | Unassigned | Singleton                        | SHHC |
| S12_vf_188846 | Unassigned | Unassigned | Unassigned | Overlap (VC_1300/VC_1301)        | SHHC |
| S12_vf_18902  | Unassigned | Unassigned | Unassigned | Outlier                          | SHHC |
| S12_vf_32615  | Unassigned | Unassigned | Unassigned | Overlap (VC_1080/VC_1510)        | SHHC |
| S12_vf_61299  | Unassigned | Unassigned | Unassigned | Overlap (VC_1262/VC_1263)        | SHHC |
| S12_vf_8173   | Unassigned | Unassigned | Unassigned | Overlap (VC_1259/VC_1563)        | SHHC |
| S12_vs_111286 | Unassigned | Unassigned | Unassigned | Overlap (VC_1530/VC_1560)        | SHHC |
| S12_vs_118154 | Unassigned | Unassigned | Unassigned | Outlier                          | SHHC |
| S12_vs_133070 | Unassigned | Unassigned | Unassigned | Outlier                          | SHHC |
| S12_vs_142625 | Unassigned | Unassigned | Unassigned | Outlier                          | SHHC |
| S12_vs_14467  | Unassigned | Unassigned | Unassigned | Outlier                          | SHHC |
| S12_vs_153780 | Unassigned | Unassigned | Unassigned | Outlier                          | SHHC |
| S12_vs_164056 | Unassigned | Unassigned | Unassigned | Singleton                        | SHHC |
| S12_vs_167155 | Unassigned | Unassigned | Unassigned | Overlap (VC_841/VC_1435/VC_1481) | SHHC |
| S12_vs_188825 | Unassigned | Unassigned | Unassigned | Outlier                          | SHHC |
| S12_vs_1980   | Unassigned | Unassigned | Unassigned | Outlier                          | SHHC |
| S12_vs_22853  | Unassigned | Unassigned | Unassigned | Outlier                          | SHHC |
| S12_vs_26847  | Unassigned | Unassigned | Unassigned | Overlap (VC_1255/VC_1593)        | SHHC |
| S12_vs_28661  | Unassigned | Unassigned | Unassigned | Outlier                          | SHHC |
| S12_vs_32669  | Unassigned | Unassigned | Unassigned | Outlier                          | SHHC |
| S12_vs_58148  | Unassigned | Unassigned | Unassigned | Overlap (VC_346/VC_779)          | SHHC |
| S12_vs_70241  | Unassigned | Unassigned | Unassigned | Singleton                        | SHHC |
| S12_vs_74280  | Unassigned | Unassigned | Unassigned | Outlier                          | SHHC |
| S12_vs_75098  | Unassigned | Unassigned | Unassigned | Outlier                          | SHHC |
| S12_vs_81729  | Unassigned | Unassigned | Unassigned | Outlier                          | SHHC |
| S12_vs_8204   | Unassigned | Unassigned | Unassigned | Outlier                          | SHHC |
| S12_vs_87088  | Unassigned | Unassigned | Unassigned | Outlier                          | SHHC |
| S12_vs_94042  | Unassigned | Unassigned | Unassigned | Outlier                          | SHHC |
| S12_vs_98175  | Unassigned | Unassigned | Unassigned | Overlap (VC_333/VC_645)          | SHHC |
| S12_vs_99219  | Unassigned | Unassigned | Unassigned | Outlier                          | SHHC |
| S13_vf_147396 | Unassigned | Unassigned | Unassigned | Outlier                          | ME   |
| S13_vf_147589 | Unassigned | Unassigned | Unassigned | Overlap (VC_1601/VC_1616)        | ME   |
| S13_vf_1770   | Unassigned | Unassigned | Unassigned | Outlier                          | ME   |
| S13_vf_3728   | Unassigned | Unassigned | Unassigned | Overlap (VC_692/VC_693)          | ME   |
| S13_vf_54201  | Unassigned | Unassigned | Unassigned | Outlier                          | ME   |
| S13_vf_66508  | Unassigned | Unassigned | Unassigned | Outlier                          | ME   |
| S13_vf_91189  | Unassigned | Unassigned | Unassigned | Overlap (VC_1608/VC_1609)        | ME   |
| S13_vf_97702  | Unassigned | Unassigned | Unassigned | Overlap (VC_1264/VC_1267)        | ME   |
| S13_vs_114213 | Unassigned | Unassigned | Unassigned | Outlier                          | ME   |
| S13_vs_13129  | Unassigned | Unassigned | Unassigned | Outlier                          | ME   |
| S13_vs_14794  | Unassigned | Unassigned | Unassigned | Outlier                          | ME   |
| S13_vs_149860 | Unassigned | Unassigned | Unassigned | Overlap (VC_762/VC_763)          | ME   |
| S13_vs_27462  | Unassigned | Unassigned | Unassigned | Outlier                          | ME   |
| S13_vs_45488  | Unassigned | Unassigned | Unassigned | Outlier                          | ME   |
| S13_vs_49889  | Unassigned | Unassigned | Unassigned | Overlap (VC_1292/VC_1574)        | ME   |
| S13_vs_57267  | Unassigned | Unassigned | Unassigned | Outlier                          | ME   |
| S14_vf_115736 | Unassigned | Unassigned | Unassigned | Overlap (VC_1481/VC_1482)        | ME   |
| S14_vf_117147 | Unassigned | Unassigned | Unassigned | Outlier                          | ME   |
| S14_vf_117155 | Unassigned | Unassigned | Unassigned | Overlap (VC_827/VC_828)          | ME   |
| S14_vf_117162 | Unassigned | Unassigned | Unassigned | Overlap (VC_1044/VC_1047)        | ME   |
| S14_vf_43340  | Unassigned | Unassigned | Unassigned | Overlap (VC_1300/VC_1302)        | ME   |
| S14_vf_51134  | Unassigned | Unassigned | Unassigned | Outlier                          | ME   |
| S14_vf_57689  | Unassigned | Unassigned | Unassigned | Outlier                          | ME   |
| S14_vf_85122  | Unassigned | Unassigned | Unassigned | Overlap (VC_563/VC_842/VC_924)   | ME   |
| S14_vf_93134  | Unassigned | Unassigned | Unassigned | Overlap (VC_1262/VC_1263)        | ME   |
| S14_vs_100227 | Unassigned | Unassigned | Unassigned | Outlier                          | ME   |
| S14_vs_101482 | Unassigned | Unassigned | Unassigned | Outlier                          | ME   |
| S14_vs_108376 | Unassigned | Unassigned | Unassigned | Outlier                          | ME   |
| S14_vs_112068 | Unassigned | Unassigned | Unassigned | Overlap (VC_1482/VC_1570)        | ME   |
| S14_vs_112252 | Unassigned | Unassigned | Unassigned | Overlap (VC_660/VC_734)          | ME   |
| S14_vs_112345 | Unassigned | Unassigned | Unassigned | Outlier                          | ME   |
| S14_vs_115377 | Unassigned | Unassigned | Unassigned | Outlier                          | ME   |
| S14_vs_115455 | Unassigned | Unassigned | Unassigned | Outlier                          | ME   |
| S14_vs_117153 | Unassigned | Unassigned | Unassigned | Overlap (VC_333/VC_645)          | ME   |
| S14_vs_20193  | Unassigned | Unassigned | Unassigned | Outlier                          | ME   |
| S14_vs_26320  | Unassigned | Unassigned | Unassigned | Outlier                          | ME   |
| S14_vs_30108  | Unassigned | Unassigned | Unassigned | Outlier                          | ME   |
| S14_vs_30439  | Unassigned | Unassigned | Unassigned | Overlap (VC_779/VC_781)          | ME   |
| S14_vs_30566  | Unassigned | Unassigned | Unassigned | Outlier                          | ME   |
| S14_vs_38905  | Unassigned | Unassigned | Unassigned | Overlap (VC_923/VC_1582)         | ME   |
| S14_vs_39266  | Unassigned | Unassigned | Unassigned | Overlap (VC_923/VC_924)          | ME   |
| S14_vs_4887   | Unassigned | Unassigned | Unassigned | Overlap (VC_1292/VC_1575)        | ME   |
| S14_vs_56251  | Unassigned | Unassigned | Unassigned | Overlap (VC_641/VC_1595)         | ME   |
| S14_vs_56410  | Unassigned | Unassigned | Unassigned | Overlap (VC_155/VC_661)          | ME   |
| S14_vs_79505  | Unassigned | Unassigned | Unassigned | Outlier                          | ME   |
| S14_vs_90934  | Unassigned | Unassigned | Unassigned | Overlap (VC_1292/VC_1610)        | ME   |
| S14_vs_9162   | Unassigned | Unassigned | Unassigned | Outlier                          | ME   |
| S14_vs_93565  | Unassigned | Unassigned | Unassigned | Outlier                          | ME   |
| S14_vs_96286  | Unassigned | Unassigned | Unassigned | Outlier                          | ME   |



|               |            |            |            |                                 |      |
|---------------|------------|------------|------------|---------------------------------|------|
| S14_vs_97835  | Unassigned | Unassigned | Unassigned | Singleton                       | ME   |
| S15_vf_33505  | Unassigned | Unassigned | Unassigned | Overlap (VC_1080/VC_1510)       | SHHC |
| S15_vf_58467  | Unassigned | Unassigned | Unassigned | Outlier                         | SHHC |
| S15_vf_71616  | Unassigned | Unassigned | Unassigned | Overlap (VC_1259/VC_1563)       | SHHC |
| S15_vs_3868   | Unassigned | Unassigned | Unassigned | Overlap (VC_952/VC_1529)        | SHHC |
| S15_vs_39804  | Unassigned | Unassigned | Unassigned | Overlap (VC_433/VC_668)         | SHHC |
| S15_vs_43913  | Unassigned | Unassigned | Unassigned | Overlap (VC_952/VC_1529)        | SHHC |
| S16_vf_100473 | Unassigned | Unassigned | Unassigned | Overlap (VC_1259/VC_1261)       | SHHC |
| S16_vf_12551  | Unassigned | Unassigned | Unassigned | Overlap (VC_841/VC_1481)        | SHHC |
| S16_vf_147326 | Unassigned | Unassigned | Unassigned | Overlap (VC_1262/VC_1265)       | SHHC |
| S16_vf_16182  | Unassigned | Unassigned | Unassigned | Overlap (VC_827/VC_828)         | SHHC |
| S16_vf_172897 | Unassigned | Unassigned | Unassigned | Outlier                         | SHHC |
| S16_vf_173095 | Unassigned | Unassigned | Unassigned | Overlap (VC_692/VC_693)         | SHHC |
| S16_vf_173133 | Unassigned | Unassigned | Unassigned | Overlap (VC_1601/VC_1616)       | SHHC |
| S16_vf_32359  | Unassigned | Unassigned | Unassigned | Outlier                         | SHHC |
| S16_vf_33218  | Unassigned | Unassigned | Unassigned | Outlier                         | SHHC |
| S16_vf_52513  | Unassigned | Unassigned | Unassigned | Overlap (VC_1555/VC_1556)       | SHHC |
| S16_vf_5809   | Unassigned | Unassigned | Unassigned | Overlap (VC_1255/VC_1593)       | SHHC |
| S16_vf_84462  | Unassigned | Unassigned | Unassigned | Overlap (VC_1255/VC_1594)       | SHHC |
| S16_vf_9270   | Unassigned | Unassigned | Unassigned | Outlier                         | SHHC |
| S16_vf_94866  | Unassigned | Unassigned | Unassigned | Overlap (VC_1259/VC_1261)       | SHHC |
| S16_vs_101072 | Unassigned | Unassigned | Unassigned | Overlap (VC_760/VC_888)         | SHHC |
| S16_vs_101671 | Unassigned | Unassigned | Unassigned | Overlap (VC_1160/VC_1164)       | SHHC |
| S16_vs_10622  | Unassigned | Unassigned | Unassigned | Outlier                         | SHHC |
| S16_vs_107235 | Unassigned | Unassigned | Unassigned | Overlap (VC_334/VC_1572)        | SHHC |
| S16_vs_11649  | Unassigned | Unassigned | Unassigned | Overlap (VC_856/VC_857)         | SHHC |
| S16_vs_118029 | Unassigned | Unassigned | Unassigned | Overlap (VC_1254/VC_1595)       | SHHC |
| S16_vs_120149 | Unassigned | Unassigned | Unassigned | Outlier                         | SHHC |
| S16_vs_120605 | Unassigned | Unassigned | Unassigned | Singleton                       | SHHC |
| S16_vs_132979 | Unassigned | Unassigned | Unassigned | Overlap (VC_335/VC_558/VC_559)  | SHHC |
| S16_vs_137222 | Unassigned | Unassigned | Unassigned | Outlier                         | SHHC |
| S16_vs_140468 | Unassigned | Unassigned | Unassigned | Singleton                       | SHHC |
| S16_vs_140709 | Unassigned | Unassigned | Unassigned | Overlap (VC_333/VC_645)         | SHHC |
| S16_vs_141218 | Unassigned | Unassigned | Unassigned | Outlier                         | SHHC |
| S16_vs_165662 | Unassigned | Unassigned | Unassigned | Outlier                         | SHHC |
| S16_vs_172749 | Unassigned | Unassigned | Unassigned | Overlap (VC_333/VC_645)         | SHHC |
| S16_vs_173141 | Unassigned | Unassigned | Unassigned | Singleton                       | SHHC |
| S16_vs_17493  | Unassigned | Unassigned | Unassigned | Overlap (VC_921/VC_1292)        | SHHC |
| S16_vs_18293  | Unassigned | Unassigned | Unassigned | Outlier                         | SHHC |
| S16_vs_20060  | Unassigned | Unassigned | Unassigned | Overlap (VC_1481/VC_1482)       | SHHC |
| S16_vs_34021  | Unassigned | Unassigned | Unassigned | Outlier                         | SHHC |
| S16_vs_35031  | Unassigned | Unassigned | Unassigned | Outlier                         | SHHC |
| S16_vs_38863  | Unassigned | Unassigned | Unassigned | Outlier                         | SHHC |
| S16_vs_54250  | Unassigned | Unassigned | Unassigned | Outlier                         | SHHC |
| S16_vs_54616  | Unassigned | Unassigned | Unassigned | Overlap (VC_346/VC_779)         | SHHC |
| S16_vs_59697  | Unassigned | Unassigned | Unassigned | Overlap (VC_1292/VC_1574)       | SHHC |
| S16_vs_76823  | Unassigned | Unassigned | Unassigned | Overlap (VC_1555/VC_1557)       | SHHC |
| S16_vs_78429  | Unassigned | Unassigned | Unassigned | Overlap (VC_841/VC_1481)        | SHHC |
| S16_vs_81805  | Unassigned | Unassigned | Unassigned | Outlier                         | SHHC |
| S16_vs_82116  | Unassigned | Unassigned | Unassigned | Overlap (VC_334/VC_556/VC_1037) | SHHC |
| S17_vf_111931 | Unassigned | Unassigned | Unassigned | Outlier                         | ME   |
| S17_vf_128147 | Unassigned | Unassigned | Unassigned | Overlap (VC_1335/VC_1337)       | ME   |
| S17_vf_140653 | Unassigned | Unassigned | Unassigned | Overlap (VC_1506/VC_1507)       | ME   |
| S17_vf_177200 | Unassigned | Unassigned | Unassigned | Overlap (VC_1044/VC_1047)       | ME   |
| S17_vf_21718  | Unassigned | Unassigned | Unassigned | Singleton                       | ME   |
| S17_vf_36452  | Unassigned | Unassigned | Unassigned | Overlap (VC_1262/VC_1263)       | ME   |
| S17_vf_46388  | Unassigned | Unassigned | Unassigned | Outlier                         | ME   |
| S17_vs_110666 | Unassigned | Unassigned | Unassigned | Outlier                         | ME   |
| S17_vs_117507 | Unassigned | Unassigned | Unassigned | Outlier                         | ME   |
| S17_vs_133231 | Unassigned | Unassigned | Unassigned | Singleton                       | ME   |
| S17_vs_157209 | Unassigned | Unassigned | Unassigned | Overlap (VC_1566/VC_1581)       | ME   |
| S17_vs_177202 | Unassigned | Unassigned | Unassigned | Outlier                         | ME   |
| S17_vs_177203 | Unassigned | Unassigned | Unassigned | Outlier                         | ME   |
| S17_vs_177210 | Unassigned | Unassigned | Unassigned | Overlap (VC_1160/VC_1164)       | ME   |
| S17_vs_31654  | Unassigned | Unassigned | Unassigned | Outlier                         | ME   |
| S17_vs_52890  | Unassigned | Unassigned | Unassigned | Outlier                         | ME   |
| S17_vs_8690   | Unassigned | Unassigned | Unassigned | Singleton                       | ME   |
| S1_vf_136526  | Unassigned | Unassigned | Unassigned | Overlap (VC_1481/VC_1482)       | ME   |
| S1_vf_138157  | Unassigned | Unassigned | Unassigned | Outlier                         | ME   |
| S1_vf_140259  | Unassigned | Unassigned | Unassigned | Outlier                         | ME   |
| S1_vf_28398   | Unassigned | Unassigned | Unassigned | Outlier                         | ME   |
| S1_vf_6272    | Unassigned | Unassigned | Unassigned | Overlap (VC_1481/VC_1482)       | ME   |
| S1_vs_117317  | Unassigned | Unassigned | Unassigned | Overlap (VC_841/VC_1481)        | ME   |
| S1_vs_133577  | Unassigned | Unassigned | Unassigned | Outlier                         | ME   |
| S1_vs_145792  | Unassigned | Unassigned | Unassigned | Overlap (VC_1291/VC_1578)       | ME   |
| S1_vs_155183  | Unassigned | Unassigned | Unassigned | Overlap (VC_841/VC_1481)        | ME   |
| S1_vs_21439   | Unassigned | Unassigned | Unassigned | Overlap (VC_1481/VC_1482)       | ME   |
| S1_vs_23682   | Unassigned | Unassigned | Unassigned | Outlier                         | ME   |
| S1_vs_3267    | Unassigned | Unassigned | Unassigned | Overlap (VC_1160/VC_1164)       | ME   |
| S2_vf_16829   | Unassigned | Unassigned | Unassigned | Overlap (VC_762/VC_763)         | SHHC |
| S2_vf_17850   | Unassigned | Unassigned | Unassigned | Overlap (VC_1262/VC_1263)       | SHHC |



|                                      |            |            |            |                                   |      |
|--------------------------------------|------------|------------|------------|-----------------------------------|------|
| S2_vf_4130                           | Unassigned | Unassigned | Unassigned | Overlap (VC_520/VC_522)           | SHHC |
| S2_vs_4368                           | Unassigned | Unassigned | Unassigned | Outlier                           | SHHC |
| S3_vf_101591                         | Unassigned | Unassigned | Unassigned | Outlier                           | ME   |
| S3_vf_101611                         | Unassigned | Unassigned | Unassigned | Outlier                           | ME   |
| S3_vf_111893                         | Unassigned | Unassigned | Unassigned | Outlier                           | ME   |
| S3_vf_11428                          | Unassigned | Unassigned | Unassigned | Overlap (VC_627/VC_1564)          | ME   |
| S3_vf_127392                         | Unassigned | Unassigned | Unassigned | Outlier                           | ME   |
| S3_vf_127400                         | Unassigned | Unassigned | Unassigned | Overlap (VC_1481/VC_1482)         | ME   |
| S3_vf_127408                         | Unassigned | Unassigned | Unassigned | Outlier                           | ME   |
| S3_vf_127450                         | Unassigned | Unassigned | Unassigned | Singleton                         | ME   |
| S3_vf_2186                           | Unassigned | Unassigned | Unassigned | Outlier                           | ME   |
| S3_vf_22968                          | Unassigned | Unassigned | Unassigned | Singleton                         | ME   |
| S3_vf_23042                          | Unassigned | Unassigned | Unassigned | Outlier                           | ME   |
| S3_vf_33389                          | Unassigned | Unassigned | Unassigned | Overlap (VC_762/VC_763)           | ME   |
| S3_vf_5525                           | Unassigned | Unassigned | Unassigned | Outlier                           | ME   |
| S3_vf_56363                          | Unassigned | Unassigned | Unassigned | Outlier                           | ME   |
| S3_vf_59078                          | Unassigned | Unassigned | Unassigned | Overlap (VC_1300/VC_1302)         | ME   |
| S3_vf_7137                           | Unassigned | Unassigned | Unassigned | Overlap (VC_1550/VC_1551)         | ME   |
| S3_vf_8164                           | Unassigned | Unassigned | Unassigned | Overlap (VC_668/VC_907)           | ME   |
| S3_vf_87896                          | Unassigned | Unassigned | Unassigned | Singleton                         | ME   |
| S3_vf_99626                          | Unassigned | Unassigned | Unassigned | Outlier                           | ME   |
| S3_vs_1031                           | Unassigned | Unassigned | Unassigned | Outlier                           | ME   |
| S3_vs_119771                         | Unassigned | Unassigned | Unassigned | Outlier                           | ME   |
| S3_vs_122706                         | Unassigned | Unassigned | Unassigned | Outlier                           | ME   |
| S3_vs_127395                         | Unassigned | Unassigned | Unassigned | Outlier                           | ME   |
| S3_vs_127397                         | Unassigned | Unassigned | Unassigned | Outlier                           | ME   |
| S3_vs_127401                         | Unassigned | Unassigned | Unassigned | Outlier                           | ME   |
| S3_vs_127410                         | Unassigned | Unassigned | Unassigned | Outlier                           | ME   |
| S3_vs_127411                         | Unassigned | Unassigned | Unassigned | Singleton                         | ME   |
| S3_vs_127421                         | Unassigned | Unassigned | Unassigned | Overlap (VC_1256/VC_1564)         | ME   |
| S3_vs_15450                          | Unassigned | Unassigned | Unassigned | Outlier                           | ME   |
| S3_vs_20315                          | Unassigned | Unassigned | Unassigned | Overlap (VC_433/VC_668)           | ME   |
| S3_vs_23194                          | Unassigned | Unassigned | Unassigned | Outlier                           | ME   |
| S3_vs_25896                          | Unassigned | Unassigned | Unassigned | Overlap (VC_1291/VC_1578)         | ME   |
| S3_vs_30318                          | Unassigned | Unassigned | Unassigned | Overlap (VC_734/VC_1576)          | ME   |
| S3_vs_39940                          | Unassigned | Unassigned | Unassigned | Singleton                         | ME   |
| S3_vs_40939                          | Unassigned | Unassigned | Unassigned | Outlier                           | ME   |
| S3_vs_50557                          | Unassigned | Unassigned | Unassigned | Overlap (VC_880/VC_1487)          | ME   |
| S3_vs_51005                          | Unassigned | Unassigned | Unassigned | Overlap (VC_1160/VC_1164)         | ME   |
| S3_vs_51931                          | Unassigned | Unassigned | Unassigned | Overlap (VC_1098/VC_1100)         | ME   |
| S3_vs_56292                          | Unassigned | Unassigned | Unassigned | Outlier                           | ME   |
| S3_vs_62410                          | Unassigned | Unassigned | Unassigned | Outlier                           | ME   |
| S3_vs_6604                           | Unassigned | Unassigned | Unassigned | Outlier                           | ME   |
| S3_vs_70093                          | Unassigned | Unassigned | Unassigned | Outlier                           | ME   |
| S3_vs_87728                          | Unassigned | Unassigned | Unassigned | Singleton                         | ME   |
| S3_vs_89485                          | Unassigned | Unassigned | Unassigned | Overlap (VC_1566/VC_1581/VC_1585) | ME   |
| S3_vs_90331                          | Unassigned | Unassigned | Unassigned | Overlap (VC_730/VC_733/VC_1293)   | ME   |
| S3_vs_9158                           | Unassigned | Unassigned | Unassigned | Overlap (VC_1506/VC_1507)         | ME   |
| S3_vs_94577                          | Unassigned | Unassigned | Unassigned | Outlier                           | ME   |
| S3_vs_97827                          | Unassigned | Unassigned | Unassigned | Outlier                           | ME   |
| S4_vf_11308                          | Unassigned | Unassigned | Unassigned | Overlap (VC_334/VC_556/VC_1037)   | SHHC |
| S4_vf_13353                          | Unassigned | Unassigned | Unassigned | Overlap (VC_627/VC_1564)          | SHHC |
| S4_vf_13831                          | Unassigned | Unassigned | Unassigned | Outlier                           | SHHC |
| S4_vf_16485                          | Unassigned | Unassigned | Unassigned | Overlap (VC_1608/VC_1609)         | SHHC |
| S4_vf_17948                          | Unassigned | Unassigned | Unassigned | Singleton                         | SHHC |
| S4_vf_20440                          | Unassigned | Unassigned | Unassigned | Outlier                           | SHHC |
| S4_vf_30103                          | Unassigned | Unassigned | Unassigned | Overlap (VC_1550/VC_1551)         | SHHC |
| S4_vf_31682                          | Unassigned | Unassigned | Unassigned | Overlap (VC_333/VC_645)           | SHHC |
| S4_vf_31825                          | Unassigned | Unassigned | Unassigned | Overlap (VC_520/VC_522)           | SHHC |
| S4_vf_31979                          | Unassigned | Unassigned | Unassigned | Overlap (VC_841/VC_1435/VC_1481)  | SHHC |
| S4_vf_31982                          | Unassigned | Unassigned | Unassigned | Outlier                           | SHHC |
| S4_vs_VIRSorter_16803-cat_2          | Unassigned | Unassigned | Unassigned | Overlap (VC_779/VC_781)           | SHHC |
| S4_vs_VIRSorter_21643-cat_2          | Unassigned | Unassigned | Unassigned | Overlap (VC_641/VC_1595)          | SHHC |
| S4_vs_VIRSorter_27316-cat_2          | Unassigned | Unassigned | Unassigned | Overlap (VC_558/VC_559)           | SHHC |
| S4_vs_VIRSorter_2744-cat_3           | Unassigned | Unassigned | Unassigned | Outlier                           | SHHC |
| S4_vs_VIRSorter_29332-cat_2          | Unassigned | Unassigned | Unassigned | Overlap (VC_841/VC_1481)          | SHHC |
| S4_vs_VIRSorter_31916-circular-cat_1 | Unassigned | Unassigned | Unassigned | Overlap (VC_333/VC_645)           | SHHC |
| S4_vs_VIRSorter_31972-circular-cat_2 | Unassigned | Unassigned | Unassigned | Outlier                           | SHHC |
| S4_vs_VIRSorter_5698-cat_2           | Unassigned | Unassigned | Unassigned | Outlier                           | SHHC |
| S5_vf_103206                         | Unassigned | Unassigned | Unassigned | Outlier                           | ME   |
| S5_vf_105728                         | Unassigned | Unassigned | Unassigned | Overlap (VC_627/VC_1564)          | ME   |
| S5_vf_116300                         | Unassigned | Unassigned | Unassigned | Outlier                           | ME   |
| S5_vf_145583                         | Unassigned | Unassigned | Unassigned | Overlap (VC_563/VC_842/VC_924)    | ME   |
| S5_vf_145586                         | Unassigned | Unassigned | Unassigned | Overlap (VC_734/VC_1576)          | ME   |
| S5_vf_145604                         | Unassigned | Unassigned | Unassigned | Overlap (VC_627/VC_1564)          | ME   |
| S5_vf_21869                          | Unassigned | Unassigned | Unassigned | Overlap (VC_841/VC_1481)          | ME   |
| S5_vf_29332                          | Unassigned | Unassigned | Unassigned | Overlap (VC_880/VC_1487)          | ME   |
| S5_vf_38011                          | Unassigned | Unassigned | Unassigned | Overlap (VC_1259/VC_1261)         | ME   |
| S5_vf_55687                          | Unassigned | Unassigned | Unassigned | Outlier                           | ME   |
| S5_vf_60597                          | Unassigned | Unassigned | Unassigned | Overlap (VC_1255/VC_1594)         | ME   |
| S5_vf_8808                           | Unassigned | Unassigned | Unassigned | Outlier                           | ME   |



|              |            |            |            |                                   |      |
|--------------|------------|------------|------------|-----------------------------------|------|
| SS_vs_10428  | Unassigned | Unassigned | Unassigned | Outlier                           | ME   |
| SS_vs_109085 | Unassigned | Unassigned | Unassigned | Overlap (VC_326/VC_644)           | ME   |
| SS_vs_112452 | Unassigned | Unassigned | Unassigned | Outlier                           | ME   |
| SS_vs_113386 | Unassigned | Unassigned | Unassigned | Outlier                           | ME   |
| SS_vs_117319 | Unassigned | Unassigned | Unassigned | Overlap (VC_1086/VC_1243)         | ME   |
| SS_vs_117417 | Unassigned | Unassigned | Unassigned | Overlap (VC_155/VC_1589)          | ME   |
| SS_vs_118168 | Unassigned | Unassigned | Unassigned | Outlier                           | ME   |
| SS_vs_120584 | Unassigned | Unassigned | Unassigned | Outlier                           | ME   |
| SS_vs_121411 | Unassigned | Unassigned | Unassigned | Outlier                           | ME   |
| SS_vs_122618 | Unassigned | Unassigned | Unassigned | Outlier                           | ME   |
| SS_vs_128398 | Unassigned | Unassigned | Unassigned | Outlier                           | ME   |
| SS_vs_128881 | Unassigned | Unassigned | Unassigned | Outlier                           | ME   |
| SS_vs_130032 | Unassigned | Unassigned | Unassigned | Outlier                           | ME   |
| SS_vs_130294 | Unassigned | Unassigned | Unassigned | Overlap (VC_1610/VC_1611)         | ME   |
| SS_vs_130476 | Unassigned | Unassigned | Unassigned | Outlier                           | ME   |
| SS_vs_13254  | Unassigned | Unassigned | Unassigned | Overlap (VC_923/VC_1582)          | ME   |
| SS_vs_141621 | Unassigned | Unassigned | Unassigned | Outlier                           | ME   |
| SS_vs_145578 | Unassigned | Unassigned | Unassigned | Overlap (VC_333/VC_645)           | ME   |
| SS_vs_145582 | Unassigned | Unassigned | Unassigned | Outlier                           | ME   |
| SS_vs_145591 | Unassigned | Unassigned | Unassigned | Overlap (VC_1291/VC_1578)         | ME   |
| SS_vs_145611 | Unassigned | Unassigned | Unassigned | Outlier                           | ME   |
| SS_vs_145633 | Unassigned | Unassigned | Unassigned | Overlap (VC_1601/VC_1616)         | ME   |
| SS_vs_21778  | Unassigned | Unassigned | Unassigned | Singleton                         | ME   |
| SS_vs_27918  | Unassigned | Unassigned | Unassigned | Overlap (VC_1291/VC_1578)         | ME   |
| SS_vs_30490  | Unassigned | Unassigned | Unassigned | Overlap (VC_1292/VC_1610)         | ME   |
| SS_vs_32885  | Unassigned | Unassigned | Unassigned | Outlier                           | ME   |
| SS_vs_36605  | Unassigned | Unassigned | Unassigned | Overlap (VC_1294/VC_1575)         | ME   |
| SS_vs_37659  | Unassigned | Unassigned | Unassigned | Outlier                           | ME   |
| SS_vs_41663  | Unassigned | Unassigned | Unassigned | Singleton                         | ME   |
| SS_vs_43207  | Unassigned | Unassigned | Unassigned | Outlier                           | ME   |
| SS_vs_46394  | Unassigned | Unassigned | Unassigned | Outlier                           | ME   |
| SS_vs_4737   | Unassigned | Unassigned | Unassigned | Outlier                           | ME   |
| SS_vs_49011  | Unassigned | Unassigned | Unassigned | Overlap (VC_660/VC_734)           | ME   |
| SS_vs_51416  | Unassigned | Unassigned | Unassigned | Outlier                           | ME   |
| SS_vs_59798  | Unassigned | Unassigned | Unassigned | Outlier                           | ME   |
| SS_vs_60507  | Unassigned | Unassigned | Unassigned | Overlap (VC_265/VC_330)           | ME   |
| SS_vs_6478   | Unassigned | Unassigned | Unassigned | Overlap (VC_271/VC_315)           | ME   |
| SS_vs_65490  | Unassigned | Unassigned | Unassigned | Singleton                         | ME   |
| SS_vs_68254  | Unassigned | Unassigned | Unassigned | Overlap (VC_627/VC_1564)          | ME   |
| SS_vs_69980  | Unassigned | Unassigned | Unassigned | Overlap (VC_155/VC_661)           | ME   |
| SS_vs_72532  | Unassigned | Unassigned | Unassigned | Outlier                           | ME   |
| SS_vs_80496  | Unassigned | Unassigned | Unassigned | Overlap (VC_1530/VC_1560)         | ME   |
| SS_vs_80911  | Unassigned | Unassigned | Unassigned | Outlier                           | ME   |
| SS_vs_8125   | Unassigned | Unassigned | Unassigned | Outlier                           | ME   |
| SS_vs_84574  | Unassigned | Unassigned | Unassigned | Overlap (VC_1571/VC_1590)         | ME   |
| SS_vs_850    | Unassigned | Unassigned | Unassigned | Outlier                           | ME   |
| SS_vs_89540  | Unassigned | Unassigned | Unassigned | Outlier                           | ME   |
| SS_vs_95307  | Unassigned | Unassigned | Unassigned | Overlap (VC_334/VC_556)           | ME   |
| S6_vf_24553  | Unassigned | Unassigned | Unassigned | Overlap (VC_1259/VC_1261)         | SHHC |
| S6_vf_47238  | Unassigned | Unassigned | Unassigned | Outlier                           | SHHC |
| S6_vf_56484  | Unassigned | Unassigned | Unassigned | Outlier                           | SHHC |
| S6_vs_1146   | Unassigned | Unassigned | Unassigned | Overlap (VC_558/VC_559)           | SHHC |
| S6_vs_15390  | Unassigned | Unassigned | Unassigned | Overlap (VC_856/VC_857)           | SHHC |
| S6_vs_22637  | Unassigned | Unassigned | Unassigned | Overlap (VC_1294/VC_1575)         | SHHC |
| S6_vs_34453  | Unassigned | Unassigned | Unassigned | Overlap (VC_1086/VC_1243)         | SHHC |
| S6_vs_37812  | Unassigned | Unassigned | Unassigned | Outlier                           | SHHC |
| S6_vs_39065  | Unassigned | Unassigned | Unassigned | Outlier                           | SHHC |
| S6_vs_44070  | Unassigned | Unassigned | Unassigned | Outlier                           | SHHC |
| S6_vs_46091  | Unassigned | Unassigned | Unassigned | Overlap (VC_779/VC_782)           | SHHC |
| S6_vs_53966  | Unassigned | Unassigned | Unassigned | Overlap (VC_335/VC_558/VC_559)    | SHHC |
| S6_vs_56485  | Unassigned | Unassigned | Unassigned | Overlap (VC_641/VC_925)           | SHHC |
| S6_vs_56492  | Unassigned | Unassigned | Unassigned | Overlap (VC_1482/VC_1570)         | SHHC |
| S7_vf_11744  | Unassigned | Unassigned | Unassigned | Singleton                         | ME   |
| S7_vf_13614  | Unassigned | Unassigned | Unassigned | Outlier                           | ME   |
| S7_vf_138225 | Unassigned | Unassigned | Unassigned | Outlier                           | ME   |
| S7_vf_27309  | Unassigned | Unassigned | Unassigned | Overlap (VC_1044/VC_1047/VC_1488) | ME   |
| S7_vf_29941  | Unassigned | Unassigned | Unassigned | Outlier                           | ME   |
| S7_vf_32396  | Unassigned | Unassigned | Unassigned | Overlap (VC_1259/VC_1261)         | ME   |
| S7_vf_37293  | Unassigned | Unassigned | Unassigned | Overlap (VC_827/VC_829)           | ME   |
| S7_vf_49007  | Unassigned | Unassigned | Unassigned | Overlap (VC_827/VC_829)           | ME   |
| S7_vf_49485  | Unassigned | Unassigned | Unassigned | Overlap (VC_627/VC_1564)          | ME   |
| S7_vf_5801   | Unassigned | Unassigned | Unassigned | Outlier                           | ME   |
| S7_vf_67910  | Unassigned | Unassigned | Unassigned | Overlap (VC_725/VC_1221)          | ME   |
| S7_vf_68239  | Unassigned | Unassigned | Unassigned | Outlier                           | ME   |
| S7_vf_72493  | Unassigned | Unassigned | Unassigned | Overlap (VC_1291/VC_1578)         | ME   |
| S7_vf_8332   | Unassigned | Unassigned | Unassigned | Overlap (VC_668/VC_907)           | ME   |
| S7_vf_83624  | Unassigned | Unassigned | Unassigned | Outlier                           | ME   |
| S7_vf_89668  | Unassigned | Unassigned | Unassigned | Overlap (VC_1259/VC_1261)         | ME   |
| S7_vf_9334   | Unassigned | Unassigned | Unassigned | Outlier                           | ME   |
| S7_vs_101751 | Unassigned | Unassigned | Unassigned | Overlap (VC_1255/VC_1558)         | ME   |
| S7_vs_107876 | Unassigned | Unassigned | Unassigned | Overlap (VC_1260/VC_1267)         | ME   |



|              |            |            |            |                                   |      |
|--------------|------------|------------|------------|-----------------------------------|------|
| S7_vs_13370  | Unassigned | Unassigned | Unassigned | Singleton                         | ME   |
| S7_vs_134784 | Unassigned | Unassigned | Unassigned | Outlier                           | ME   |
| S7_vs_135322 | Unassigned | Unassigned | Unassigned | Overlap (VC_730/VC_733)           | ME   |
| S7_vs_137998 | Unassigned | Unassigned | Unassigned | Overlap (VC_1255/VC_1558)         | ME   |
| S7_vs_138116 | Unassigned | Unassigned | Unassigned | Singleton                         | ME   |
| S7_vs_138140 | Unassigned | Unassigned | Unassigned | Outlier                           | ME   |
| S7_vs_13903  | Unassigned | Unassigned | Unassigned | Overlap (VC_1264/VC_1267)         | ME   |
| S7_vs_14275  | Unassigned | Unassigned | Unassigned | Outlier                           | ME   |
| S7_vs_16344  | Unassigned | Unassigned | Unassigned | Outlier                           | ME   |
| S7_vs_21521  | Unassigned | Unassigned | Unassigned | Outlier                           | ME   |
| S7_vs_23770  | Unassigned | Unassigned | Unassigned | Overlap (VC_326/VC_644)           | ME   |
| S7_vs_26235  | Unassigned | Unassigned | Unassigned | Outlier                           | ME   |
| S7_vs_26757  | Unassigned | Unassigned | Unassigned | Singleton                         | ME   |
| S7_vs_28150  | Unassigned | Unassigned | Unassigned | Overlap (VC_155/VC_1589)          | ME   |
| S7_vs_29595  | Unassigned | Unassigned | Unassigned | Outlier                           | ME   |
| S7_vs_30640  | Unassigned | Unassigned | Unassigned | Overlap (VC_1254/VC_1595)         | ME   |
| S7_vs_30665  | Unassigned | Unassigned | Unassigned | Singleton                         | ME   |
| S7_vs_36656  | Unassigned | Unassigned | Unassigned | Outlier                           | ME   |
| S7_vs_40259  | Unassigned | Unassigned | Unassigned | Outlier                           | ME   |
| S7_vs_4114   | Unassigned | Unassigned | Unassigned | Overlap (VC_841/VC_1481)          | ME   |
| S7_vs_43529  | Unassigned | Unassigned | Unassigned | Overlap (VC_1482/VC_1570)         | ME   |
| S7_vs_51332  | Unassigned | Unassigned | Unassigned | Outlier                           | ME   |
| S7_vs_55031  | Unassigned | Unassigned | Unassigned | Outlier                           | ME   |
| S7_vs_55526  | Unassigned | Unassigned | Unassigned | Overlap (VC_880/VC_1487)          | ME   |
| S7_vs_60775  | Unassigned | Unassigned | Unassigned | Overlap (VC_333/VC_645)           | ME   |
| S7_vs_65719  | Unassigned | Unassigned | Unassigned | Overlap (VC_627/VC_1564)          | ME   |
| S7_vs_70265  | Unassigned | Unassigned | Unassigned | Outlier                           | ME   |
| S7_vs_72737  | Unassigned | Unassigned | Unassigned | Outlier                           | ME   |
| S7_vs_83474  | Unassigned | Unassigned | Unassigned | Overlap (VC_841/VC_1481)          | ME   |
| S7_vs_87279  | Unassigned | Unassigned | Unassigned | Overlap (VC_1086/VC_1243)         | ME   |
| S7_vs_94738  | Unassigned | Unassigned | Unassigned | Overlap (VC_841/VC_1481)          | ME   |
| S7_vs_95276  | Unassigned | Unassigned | Unassigned | Overlap (VC_1292/VC_1575)         | ME   |
| S7_vs_97737  | Unassigned | Unassigned | Unassigned | Overlap (VC_1610/VC_1611)         | ME   |
| S8_vf_102508 | Unassigned | Unassigned | Unassigned | Singleton                         | SHHC |
| S8_vf_122206 | Unassigned | Unassigned | Unassigned | Outlier                           | SHHC |
| S8_vf_13709  | Unassigned | Unassigned | Unassigned | Outlier                           | SHHC |
| S8_vf_147338 | Unassigned | Unassigned | Unassigned | Outlier                           | SHHC |
| S8_vf_153696 | Unassigned | Unassigned | Unassigned | Overlap (VC_1259/VC_1261)         | SHHC |
| S8_vf_159173 | Unassigned | Unassigned | Unassigned | Overlap (VC_1262/VC_1267)         | SHHC |
| S8_vf_192724 | Unassigned | Unassigned | Unassigned | Outlier                           | SHHC |
| S8_vf_195032 | Unassigned | Unassigned | Unassigned | Overlap (VC_725/VC_1221)          | SHHC |
| S8_vf_201695 | Unassigned | Unassigned | Unassigned | Overlap (VC_1255/VC_1594)         | SHHC |
| S8_vf_208111 | Unassigned | Unassigned | Unassigned | Singleton                         | SHHC |
| S8_vf_208115 | Unassigned | Unassigned | Unassigned | Overlap (VC_1300/VC_1301)         | SHHC |
| S8_vf_28956  | Unassigned | Unassigned | Unassigned | Overlap (VC_1506/VC_1507)         | SHHC |
| S8_vf_3410   | Unassigned | Unassigned | Unassigned | Overlap (VC_1260/VC_1267)         | SHHC |
| S8_vf_49282  | Unassigned | Unassigned | Unassigned | Overlap (VC_520/VC_522)           | SHHC |
| S8_vf_65522  | Unassigned | Unassigned | Unassigned | Outlier                           | SHHC |
| S8_vf_72329  | Unassigned | Unassigned | Unassigned | Overlap (VC_841/VC_1481)          | SHHC |
| S8_vf_7243   | Unassigned | Unassigned | Unassigned | Singleton                         | SHHC |
| S8_vf_91033  | Unassigned | Unassigned | Unassigned | Overlap (VC_762/VC_763)           | SHHC |
| S8_vs_102608 | Unassigned | Unassigned | Unassigned | Overlap (VC_1555/VC_1557)         | SHHC |
| S8_vs_110692 | Unassigned | Unassigned | Unassigned | Outlier                           | SHHC |
| S8_vs_113059 | Unassigned | Unassigned | Unassigned | Outlier                           | SHHC |
| S8_vs_126582 | Unassigned | Unassigned | Unassigned | Outlier                           | SHHC |
| S8_vs_132472 | Unassigned | Unassigned | Unassigned | Outlier                           | SHHC |
| S8_vs_139391 | Unassigned | Unassigned | Unassigned | Overlap (VC_841/VC_1481)          | SHHC |
| S8_vs_147670 | Unassigned | Unassigned | Unassigned | Outlier                           | SHHC |
| S8_vs_147697 | Unassigned | Unassigned | Unassigned | Outlier                           | SHHC |
| S8_vs_152553 | Unassigned | Unassigned | Unassigned | Overlap (VC_1292/VC_1574)         | SHHC |
| S8_vs_173961 | Unassigned | Unassigned | Unassigned | Overlap (VC_1256/VC_1564)         | SHHC |
| S8_vs_179529 | Unassigned | Unassigned | Unassigned | Overlap (VC_730/VC_733/VC_1293)   | SHHC |
| S8_vs_185041 | Unassigned | Unassigned | Unassigned | Outlier                           | SHHC |
| S8_vs_196247 | Unassigned | Unassigned | Unassigned | Singleton                         | SHHC |
| S8_vs_208127 | Unassigned | Unassigned | Unassigned | Overlap (VC_730/VC_1293)          | SHHC |
| S8_vs_3224   | Unassigned | Unassigned | Unassigned | Outlier                           | SHHC |
| S8_vs_35308  | Unassigned | Unassigned | Unassigned | Overlap (VC_841/VC_1481)          | SHHC |
| S8_vs_40014  | Unassigned | Unassigned | Unassigned | Overlap (VC_1566/VC_1581/VC_1585) | SHHC |
| S8_vs_51368  | Unassigned | Unassigned | Unassigned | Overlap (VC_1555/VC_1556)         | SHHC |
| S8_vs_54183  | Unassigned | Unassigned | Unassigned | Overlap (VC_841/VC_1481)          | SHHC |
| S8_vs_63277  | Unassigned | Unassigned | Unassigned | Outlier                           | SHHC |
| S8_vs_72117  | Unassigned | Unassigned | Unassigned | Outlier                           | SHHC |
| S8_vs_88013  | Unassigned | Unassigned | Unassigned | Overlap (VC_1481/VC_1482)         | SHHC |
| S9_vf_19284  | Unassigned | Unassigned | Unassigned | Outlier                           | ME   |
| S9_vf_90856  | Unassigned | Unassigned | Unassigned | Overlap (VC_262/VC_427)           | ME   |
| S9_vf_934    | Unassigned | Unassigned | Unassigned | Outlier                           | ME   |
| S9_vs_14235  | Unassigned | Unassigned | Unassigned | Outlier                           | ME   |
| S9_vs_19689  | Unassigned | Unassigned | Unassigned | Outlier                           | ME   |
| S9_vs_2799   | Unassigned | Unassigned | Unassigned | Outlier                           | ME   |
| S9_vs_37437  | Unassigned | Unassigned | Unassigned | Overlap (VC_641/VC_925)           | ME   |
| S9_vs_41371  | Unassigned | Unassigned | Unassigned | Outlier                           | ME   |



|             |            |            |            |                           |     |
|-------------|------------|------------|------------|---------------------------|-----|
| S9_vs_42609 | Unassigned | Unassigned | Unassigned | Singleton                 | ME  |
| S9_vs_44331 | Unassigned | Unassigned | Unassigned | Outlier                   | ME  |
| S9_vs_48240 | Unassigned | Unassigned | Unassigned | Overlap (VC_334/VC_556)   | ME  |
| S9_vs_48347 | Unassigned | Unassigned | Unassigned | Overlap (VC_779/VC_782)   | ME  |
| S9_vs_55738 | Unassigned | Unassigned | Unassigned | Outlier                   | ME  |
| S9_vs_58086 | Unassigned | Unassigned | Unassigned | Outlier                   | ME  |
| S9_vs_62803 | Unassigned | Unassigned | Unassigned | Outlier                   | ME  |
| S9_vs_66877 | Unassigned | Unassigned | Unassigned | Outlier                   | ME  |
| S9_vs_67792 | Unassigned | Unassigned | Unassigned | Outlier                   | ME  |
| S9_vs_69322 | Unassigned | Unassigned | Unassigned | Overlap (VC_1291/VC_1578) | ME  |
| S9_vs_88286 | Unassigned | Unassigned | Unassigned | Overlap (VC_1291/VC_1578) | ME  |
| S9_vs_88847 | Unassigned | Unassigned | Unassigned | Overlap (VC_1571/VC_1590) | ME  |
| S9_vs_90848 | Unassigned | Unassigned | Unassigned | Overlap (VC_627/VC_1564)  | ME  |
| S9_vs_90850 | Unassigned | Unassigned | Unassigned | Overlap (VC_760/VC_888)   | ME  |
| SPVDNA      | Unassigned | Unassigned | Unassigned | Outlier                   | Ref |
| X51522      | Unassigned | Unassigned | Unassigned | Singleton                 | Ref |
| X58839      | Unassigned | Unassigned | Unassigned | Singleton                 | Ref |
| X80191      | Unassigned | Unassigned | Unassigned | Outlier                   | Ref |
| X96987      | Unassigned | Unassigned | Unassigned | Overlap (VC_843/VC_846)   | Ref |



Table S7-3. VCs\_references\_only

|           |                                                                                                                                                                                                                                                                                                                                                                                                                                                                                                                                                                                                                                              |
|-----------|----------------------------------------------------------------------------------------------------------------------------------------------------------------------------------------------------------------------------------------------------------------------------------------------------------------------------------------------------------------------------------------------------------------------------------------------------------------------------------------------------------------------------------------------------------------------------------------------------------------------------------------------|
| VC        | Members                                                                                                                                                                                                                                                                                                                                                                                                                                                                                                                                                                                                                                      |
| VC_0_0    | AB002632,KC357596,OP297622                                                                                                                                                                                                                                                                                                                                                                                                                                                                                                                                                                                                                   |
| VC_1_0    | AB276040,AB981169,GU911303,KP966108,MG747435,MT701591,ON170026,ON170032,ON170053,ON170059,ON170061,ON170067,ON170070,ON170073,ON170076,ON170078,ON170080,ON170081,ON170082,ON170084,ON170128,ON170130,ON170131,ON170135,ON170151,ON170173,ON170210,ON170213,ON170227,ON170230,ON170233,ON170235,ON170237,ON170239,ON170241,ON170243,ON170258,ON170261,ON170263,ON170266,ON170268,ON170270,ON170272,ON170276,ON170304,ON170305,ON170321,ON170325,ON170329,ON170344,ON170347,ON170348,ON170351,ON642070                                                                                                                                        |
| VC_10_0   | AP011955,AP011956,AY508486,CP062430,CP062436,CP062447,DQ530361,GQ398772,KC595278,KF831354,KJ452292,KJ596420,KT809368,KT809369,KT878766,KY653123,MG029510,MG029512,MH384259,MH401416,MW924889,OP038320,OPI36135,OP328423,OP493558                                                                                                                                                                                                                                                                                                                                                                                                             |
| VC_1000_0 | MG596800,MN982619                                                                                                                                                                                                                                                                                                                                                                                                                                                                                                                                                                                                                            |
| VC_1001_0 | MK608336,OK499995,OL539452                                                                                                                                                                                                                                                                                                                                                                                                                                                                                                                                                                                                                   |
| VC_1002_0 | JX126919,JX126920,JX442241,KJ094020,KJ094021,MH299806,MN114082,MN114083,MN128593,MN904502                                                                                                                                                                                                                                                                                                                                                                                                                                                                                                                                                    |
| VC_1003_0 | JQ309827,KT932700,LT630001,MK721183,MK721184,MK721185,MK721188,MK721193,MK721195,MK721196,MK721197,MK721198,MT747434,MT757399,MW623430,ON352054                                                                                                                                                                                                                                                                                                                                                                                                                                                                                              |
| VC_1004_0 | KT945995,MK360025,OL799259,ON113181                                                                                                                                                                                                                                                                                                                                                                                                                                                                                                                                                                                                          |
| VC_1005_0 | JQ312117,MK637516,MT234341                                                                                                                                                                                                                                                                                                                                                                                                                                                                                                                                                                                                                   |
| VC_1006_0 | MN988470,MN988484,MN988495,MN988531,MN988537,MN988544,MN988546,MN988557,MW980069                                                                                                                                                                                                                                                                                                                                                                                                                                                                                                                                                             |
| VC_1007_0 | KP280063,KY883654,KY883655                                                                                                                                                                                                                                                                                                                                                                                                                                                                                                                                                                                                                   |
| VC_1007_1 | JQ340389,LC487410,MG649966,MG649967,MK796244,MK895508,MK907780,MN954399,MN958086,MN966730,MN966731,MN966732,MT448616,MT448617,MT459144,MT460514,MT460515,MT460516,MT460517,MT460518,MW344054,MW344055,MW344056,MW398869                                                                                                                                                                                                                                                                                                                                                                                                                      |
| VC_1007_2 | KT345706                                                                                                                                                                                                                                                                                                                                                                                                                                                                                                                                                                                                                                     |
| VC_1008_0 | MH645904,MH925094,MN871505,MN871510,MN871511,MT442039                                                                                                                                                                                                                                                                                                                                                                                                                                                                                                                                                                                        |
| VC_1009_0 | MW824415,MW824416,MW824419,MW824422,MW824423,MW824424,MW824425,MW824426                                                                                                                                                                                                                                                                                                                                                                                                                                                                                                                                                                      |
| VC_101_0  | AB647160,AB731695,JF734911,JQ617284,KX119174,KX119175,KX119176,KX119177,KX119182,KX119188,KX119189,KX119190,KX119191,KX119192,KX119193,KX119194,KX119195,KX119196,KX119197,KX119198,KX119199,KX119200,KX119201,KX119202,KX119203,KX119204,KX119205,KX119206,MW247144,MW247145,MW247147,OM515228                                                                                                                                                                                                                                                                                                                                              |
| VC_1010_0 | JQ823122,JQ823123                                                                                                                                                                                                                                                                                                                                                                                                                                                                                                                                                                                                                            |
| VC_1011_0 | ON529850,ON529857                                                                                                                                                                                                                                                                                                                                                                                                                                                                                                                                                                                                                            |
| VC_1011_1 | ON529851,ON529852,ON529853,ON529855,ON529860                                                                                                                                                                                                                                                                                                                                                                                                                                                                                                                                                                                                 |
| VC_1011_2 | JX100810,MH588545                                                                                                                                                                                                                                                                                                                                                                                                                                                                                                                                                                                                                            |
| VC_1011_3 | JX100814,MH588544                                                                                                                                                                                                                                                                                                                                                                                                                                                                                                                                                                                                                            |
| VC_1011_4 | JX100809,JX100811,JX100812,JX100813,JX163858,KY555142,KY555143,KY555144,KY555145,KY555146,KY555147                                                                                                                                                                                                                                                                                                                                                                                                                                                                                                                                           |
| VC_1011_5 | ON529858                                                                                                                                                                                                                                                                                                                                                                                                                                                                                                                                                                                                                                     |
| VC_1012_0 | KT870145,MH015255                                                                                                                                                                                                                                                                                                                                                                                                                                                                                                                                                                                                                            |
| VC_1012_1 | MN602268,MT270409                                                                                                                                                                                                                                                                                                                                                                                                                                                                                                                                                                                                                            |
| VC_1012_2 | OPI86293                                                                                                                                                                                                                                                                                                                                                                                                                                                                                                                                                                                                                                     |
| VC_1013_0 | KY629563,OL963731                                                                                                                                                                                                                                                                                                                                                                                                                                                                                                                                                                                                                            |
| VC_1013_1 | OL955261                                                                                                                                                                                                                                                                                                                                                                                                                                                                                                                                                                                                                                     |
| VC_1015_0 | JX182369,ON526970,ON526974                                                                                                                                                                                                                                                                                                                                                                                                                                                                                                                                                                                                                   |
| VC_1015_1 | JX182370,JX262376,MF766044,MF766045,MF766046,MF766047,MF766048,MG593802,MH001460,MH590601,MH651190,MH669004,MH669016,MK392363,MK392364,MK392365,MK392366,MK460245,MK524524,MN234192,MN234208,MN310863,MT701594,MT701597,MT708548,OK412919                                                                                                                                                                                                                                                                                                                                                                                                    |
| VC_1016_0 | JX889246,KC700556,KC700557,KC700558,KT124227,KT124228,KT124229,KT152029,KT184390,KT184391,KT186228,KT186229,KX344445,KX507343,KX507344,KX507345,KX815338,MF541403,MF541404,MF541405,MF541406,MF541407,MF541408,MF541409,MF541410,MG298964,MG757163,MH171093,MH171094,MH171095,MH171096,MH171097,MH171098,MH248947,MK433270,MK433271,MK433276,MK433278,MN096373,MN096375,MN096379,MN096381,MN204498,MN248489,MN586009,MT701598,MT711978,MT711979,MW365951,MW435856,MZ648032,MZ648039,MZ648040,MZ820088,MZ820091,MZ820092,OL455891,OL455894,OL742563,ON208832,ON526985                                                                         |
| VC_1018_0 | JX290549,KR604693,KT240186,KX278418,KX278419,KY953156,LC063634,LC375533,MH807811,MH807814,MH807816,MH807818,MH807819,MK095192,MK095193,MK095194,MK095195,MK095196,MK095197,MK095198,MK095199,MK095200,MK095201,MK095202,MK095203,MK095204,MK095205,MK095206,MK095207,MK095208,MK095209,MK095210,MK095211,MN270887,MN270888,MN271656,MN812690,MN812692                                                                                                                                                                                                                                                                                        |
| VC_102_0  | KC330679,KC330680,KC330681,KC330682,KC330683,KC330684,KF669648,KF669651,KF669659,KU836751,MG983742,MH884513,MN727882,MT422786,MT514532                                                                                                                                                                                                                                                                                                                                                                                                                                                                                                       |
| VC_1020_0 | JX483874,JX483875,JX483879,JX483880,MF403005,MF403006,MN988466,MN988488,MN988492,MN988493,MN988512,MN988513,MN988514,MN988528,MN988529,MT708544,MT708546,MW960034,MW980062,MW980065,MW980074,MZ462995                                                                                                                                                                                                                                                                                                                                                                                                                                        |
| VC_1021_0 | MF278336,MW043865                                                                                                                                                                                                                                                                                                                                                                                                                                                                                                                                                                                                                            |
| VC_1022_0 | KY065149,MT227925                                                                                                                                                                                                                                                                                                                                                                                                                                                                                                                                                                                                                            |
| VC_1023_0 | KF614509,MN988552,MT778840                                                                                                                                                                                                                                                                                                                                                                                                                                                                                                                                                                                                                   |
| VC_1024_0 | KC292024,KC292028                                                                                                                                                                                                                                                                                                                                                                                                                                                                                                                                                                                                                            |
| VC_1025_0 | KP087954,MH572347,MH572348,MH572349,MH572405,MH572418,MH572455,MH572515                                                                                                                                                                                                                                                                                                                                                                                                                                                                                                                                                                      |
| VC_1027_0 | MK249135                                                                                                                                                                                                                                                                                                                                                                                                                                                                                                                                                                                                                                     |
| VC_1028_0 | KC131022,KM589502,KM589511,KT264813,KT264814,KT264815,MG945202,MG945465,MG945477,MG945663,MG945838,MG945843,MH572283,MH572284,MH572285,MH572286,MH572291,MH572292,MH572293,MH572382,MH572383,MH572423,MH572424,MH572427,MH572428,MH572466,MH572495,MH572504,MH992156,MH992161,MH992184,MH992185,MH992213,MK249141,MK249147,MK249165,MK249185,MK249190,MK249197,MK249201,MK249202,MK249203,MK249211,MK249213,MK249221,MK496825,MN862333,MN862335,MN862341,MW202412,MW202414,MW202466,MW202471,MW202549,MW202587,MW202847,MW202853,MW202883,MZ364228,MZ364233,MZ364240,MZ364243,MZ364256,MZ364258,MZ364259,MZ364267,MZ364274,OL617029,OM523002 |
| VC_1029_0 | MN862339,MN862340                                                                                                                                                                                                                                                                                                                                                                                                                                                                                                                                                                                                                            |
| VC_103_0  | KY565347,MH884514,OP341625                                                                                                                                                                                                                                                                                                                                                                                                                                                                                                                                                                                                                   |
| VC_1030_0 | MH992169                                                                                                                                                                                                                                                                                                                                                                                                                                                                                                                                                                                                                                     |
| VC_1031_0 | MH572299,MH572425                                                                                                                                                                                                                                                                                                                                                                                                                                                                                                                                                                                                                            |
| VC_1032_0 | MH572426,MK249189                                                                                                                                                                                                                                                                                                                                                                                                                                                                                                                                                                                                                            |
| VC_1033_0 | MG945161,MK249131,MK249144,MK249156,MK249159,MK249160,MK249167,MK249179,MK249181,MZ364226,MZ364241,MZ364244,MZ364245,MZ364246,MZ364247,MZ364249,MZ364250,MZ364260,MZ364263,MZ364266,MZ364270                                                                                                                                                                                                                                                                                                                                                                                                                                                 |
| VC_1037_0 | MT152698,MZ334527                                                                                                                                                                                                                                                                                                                                                                                                                                                                                                                                                                                                                            |
| VC_1038_0 | MN698240,MN698245,MN698246,MN698248                                                                                                                                                                                                                                                                                                                                                                                                                                                                                                                                                                                                          |
| VC_1039_0 | MW202462,MW202544                                                                                                                                                                                                                                                                                                                                                                                                                                                                                                                                                                                                                            |
| VC_104_0  | KJ159566,KT001912                                                                                                                                                                                                                                                                                                                                                                                                                                                                                                                                                                                                                            |
| VC_1042_0 | KC595511,KT070866,MG967616,MG967617,MG967618,MK288022,MW392801,MW392802                                                                                                                                                                                                                                                                                                                                                                                                                                                                                                                                                                      |
| VC_1043_0 | MT074134,MT074135,MT074143,MT074144,MT074145,MT074147,MT074148,MT074149,MT074150,MT074151,MT074152,MT074153,MT074154,MT074155,MT074156,MT074157,MT074158,MT074159,MT074160                                                                                                                                                                                                                                                                                                                                                                                                                                                                   |
| VC_1047_0 | KC821606,KC821623,KC821628,KC821631,MT732445,MT732446,MT732447,MT732448,MT732449                                                                                                                                                                                                                                                                                                                                                                                                                                                                                                                                                             |
| VC_1048_0 | KC821608,KC821620,KC821622,KC821633                                                                                                                                                                                                                                                                                                                                                                                                                                                                                                                                                                                                          |
| VC_1049_0 | MN812206,MN812207,MN812208,MN812209,MN812210,MN812212,MN812213,MN812214,MN812215,MN812216,MN812217,MN812218,MN812219,MN812220,MN812221,MN812222,MN812223,MN812224,MN812225,MN812226,MN812227,MN812228,MN812229,MN812230,MN812231,MN812232,MN812233                                                                                                                                                                                                                                                                                                                                                                                           |
| VC_105_0  | MN176222,MN176223,MN176224,MN176225,MN176226,MN176229                                                                                                                                                                                                                                                                                                                                                                                                                                                                                                                                                                                        |
| VC_1050_0 | KR136259,KR136260                                                                                                                                                                                                                                                                                                                                                                                                                                                                                                                                                                                                                            |
| VC_1051_0 | JT497017,MT497065,MT497066,MT497067,MT497068,MT497069,MT497070,MT497071,MT497072,MT497073,MT497074,MT497075,MT497076,MT497077,MT497078,MT497079,MT497080,MT497081,MT497082,MT497083,MT497084,MT497085,MT497086,MT497087,MT497088,MT497089,MT497090,MT497091,MT497092,MT497093,MT497094,MT497095,MT497096,MT497097,MT497098,MT497099,MT497100,MT497101,MT497102,MT497103,MT497104,MT497105,MT497106,MT497107,MT497108,MT497109,MT497110,MT497111,MT497112,MT497113,MT497114,MT497115,MT497116,MT497117,MT497118,MT497119,MT497120,MT497121,MT497122,MT497123,MT497124,MT497125                                                                |
| VC_1052_0 | MT732435,MT732436,MT732437,MT732438,MT732439,MT732440,MT732441,MT732442                                                                                                                                                                                                                                                                                                                                                                                                                                                                                                                                                                      |



|           |                                                                                                                                                                                                                                                                                                                                                                                                                                                                                     |
|-----------|-------------------------------------------------------------------------------------------------------------------------------------------------------------------------------------------------------------------------------------------------------------------------------------------------------------------------------------------------------------------------------------------------------------------------------------------------------------------------------------|
| VC_1053_0 | KC821609,KC821632,KT962245,KT962246,KT962247                                                                                                                                                                                                                                                                                                                                                                                                                                        |
| VC_1057_0 | KC821612,KC821614,MT732432,MT732433,MT732434                                                                                                                                                                                                                                                                                                                                                                                                                                        |
| VC_1058_0 | KC821613,KC821615,KC821617,KC821619,KC821627                                                                                                                                                                                                                                                                                                                                                                                                                                        |
| VC_1059_0 | MK764442,MK764445,MK764448,MN812203,MN812204,MN812205,MW421581,MW421582,MW421583,MW421584                                                                                                                                                                                                                                                                                                                                                                                           |
| VC_106_0  | MH752385,MN013088,MN176219,MN176227,MN176228,X97918                                                                                                                                                                                                                                                                                                                                                                                                                                 |
| VC_1060_0 | KY206887,MK017819,MN417334,OP381444                                                                                                                                                                                                                                                                                                                                                                                                                                                 |
| VC_1061_0 | KC959568,KU599887,KU599888,KU599889,MK764437,MK764440,MK764450,MW421576                                                                                                                                                                                                                                                                                                                                                                                                             |
| VC_1064_0 | KC960489,KF981876                                                                                                                                                                                                                                                                                                                                                                                                                                                                   |
| VC_1065_0 | KF005317,KF005318,KF005319,KF005320                                                                                                                                                                                                                                                                                                                                                                                                                                                 |
| VC_1066_0 | KX257490,MW805362                                                                                                                                                                                                                                                                                                                                                                                                                                                                   |
| VC_1067_0 | KF322026,KF800937,KJ502657,KY290756,KY626176,KY626177,MF481197,MG018929,MG545917,MH113812,MH113813,MH113814,MH113815,MK455769,MK455770,MK820013,MN807240,MT941682,MW451247,MW865291                                                                                                                                                                                                                                                                                                 |
| VC_1068_0 | KU245542,OK638201,OK638202,OK638203,OL343755,OL473897,OL622073,ON857939                                                                                                                                                                                                                                                                                                                                                                                                             |
| VC_1069_0 | MW677511,MW677527,OP009274,OP009281                                                                                                                                                                                                                                                                                                                                                                                                                                                 |
| VC_1070_0 | MG596799,MK473373,MZ605292                                                                                                                                                                                                                                                                                                                                                                                                                                                          |
| VC_1071_0 | KF669655,KF669657,KF669660,KM236247,KM236248,KP411017,KT001911                                                                                                                                                                                                                                                                                                                                                                                                                      |
| VC_1073_0 | ON645346,OP580516                                                                                                                                                                                                                                                                                                                                                                                                                                                                   |
| VC_1073_1 | KF692088                                                                                                                                                                                                                                                                                                                                                                                                                                                                            |
| VC_1074_0 | MH834603,MH834605,MH834611,MH834614,MH834623,ON970561                                                                                                                                                                                                                                                                                                                                                                                                                               |
| VC_1075_0 | MH834598,MH834612,MH834625,MH910036,MH910037,MH910041,MW712719,ON724017,ON970598,OP434442,OP434463                                                                                                                                                                                                                                                                                                                                                                                  |
| VC_1076_0 | MH834621,MH834627,MK392368,MZ150784,MZ274308,ON392166                                                                                                                                                                                                                                                                                                                                                                                                                               |
| VC_1078_0 | KF751793,KF751794,KF751795,KF751796,KF751797                                                                                                                                                                                                                                                                                                                                                                                                                                        |
| VC_108_0  | ON210834,ON210835                                                                                                                                                                                                                                                                                                                                                                                                                                                                   |
| VC_108_1  | OM654379                                                                                                                                                                                                                                                                                                                                                                                                                                                                            |
| VC_1080_0 | KT876725,KU599880,KU599881,KU599882,KU599883,KU599884,KU599885,MK764436,MK764438,MK764439,MK764443,MK764444,MK764446,MK764447,OK268422,OK268423,OK268424,OK268425,OK268426,OK268427,OK340817,OK340818,OK340819                                                                                                                                                                                                                                                                      |
| VC_1081_0 | MG592391,MG592421,MG592436,MG592443,MG592445,MG592449,MG592661,OX241561,OX241569                                                                                                                                                                                                                                                                                                                                                                                                    |
| VC_1083_0 | MN096357,MN096358,MT818426,ON526969                                                                                                                                                                                                                                                                                                                                                                                                                                                 |
| VC_1084_0 | MN183282,MT771347                                                                                                                                                                                                                                                                                                                                                                                                                                                                   |
| VC_1086_0 | MN988468,MN988516                                                                                                                                                                                                                                                                                                                                                                                                                                                                   |
| VC_1087_0 | KJ510413,KM591905,MF155936,MG925349,MH001451,MK494089,MN735432                                                                                                                                                                                                                                                                                                                                                                                                                      |
| VC_1088_0 | MW584157,MW584173,MW584189,MW584206,MW584209                                                                                                                                                                                                                                                                                                                                                                                                                                        |
| VC_1089_0 | KJ617393,LK392619,Z47794                                                                                                                                                                                                                                                                                                                                                                                                                                                            |
| VC_1090_0 | KJ802832,KX987158,KY002061,MH586730,MZ726797,OL604152,ON602746,OP617744                                                                                                                                                                                                                                                                                                                                                                                                             |
| VC_1091_0 | MG592411,MG592538,MG592563,MG592564,MG592565,MG592571,MG592632,MG592633,MG592634,MG592635,MG592636,MG592637,MG592638,MG592639,MG592640,MG592642,MG592645,MG592646,MG592648,MG592649,MG592650,MG592651,MG592652,MG592653                                                                                                                                                                                                                                                             |
| VC_1091_1 | MG592397,MG592406,MG592407,MG592408,MG592416,MG592417,MG592428,MG592463,MG592464,MG592471,MG592475,MG592476,MG592492,MG592493,MG592528,MG592601,MG592602,MG592617,MG592618,MG592655,MH925092,MW824418,MW824430,MW824432,MW824433,MW824434,OX241427,OX241556,OX241563                                                                                                                                                                                                                |
| VC_1092_0 | KM058087,MW900438                                                                                                                                                                                                                                                                                                                                                                                                                                                                   |
| VC_1093_0 | MT234342,MT234343                                                                                                                                                                                                                                                                                                                                                                                                                                                                   |
| VC_1093_1 | KF881232                                                                                                                                                                                                                                                                                                                                                                                                                                                                            |
| VC_1093_2 | MF403007                                                                                                                                                                                                                                                                                                                                                                                                                                                                            |
| VC_1093_3 | KM199770,MN549360,MN549361,MT778837,MT778839                                                                                                                                                                                                                                                                                                                                                                                                                                        |
| VC_1093_4 | MN988486,MN988509,MN988520,MN988532,MN988534,MN988553                                                                                                                                                                                                                                                                                                                                                                                                                               |
| VC_1094_0 | MG945594                                                                                                                                                                                                                                                                                                                                                                                                                                                                            |
| VC_1095_0 | KM589498,KT264826,KT264827,MG945473,MG945703,MH931003,MK496723,MN379633,MN379651,OM522999,OM523001,OM869624                                                                                                                                                                                                                                                                                                                                                                         |
| VC_11_0   | AP019560,AP019561,AP019562,KX827368,KX827369,KX827370,MF428478,MF428479,MF428480,MF428481,MK075003,MK075006,MN028536,MT423823,MT423824,OM373551,OM373552,OM373553,OP168678                                                                                                                                                                                                                                                                                                          |
| VC_110_0  | AB712291,HE962497,JF731128,KF192053,KJ094032,KJ127303,KT932699,KY303907,KY472224,LC547238,MH618488,MH791415,MK570225,MK721189,MK721194,MK800154,MN103542,MN871443,MN939408,MW677132,MZ333457,OL505085,OL870612,ON086985,ON113171,ON113172,ON113173,ON113174,ON113175,ON113177,ON113178,ON113179,ON113180                                                                                                                                                                            |
| VC_1100_0 | OM869532,OM869702                                                                                                                                                                                                                                                                                                                                                                                                                                                                   |
| VC_1101_0 | MG945835,MH992170,MH992193                                                                                                                                                                                                                                                                                                                                                                                                                                                          |
| VC_1103_0 | KM589499,KM589507                                                                                                                                                                                                                                                                                                                                                                                                                                                                   |
| VC_1104_0 | KM589500,KM589503,KM589504,KM589505,KM589509,KM589510,KM589512,KM589513,KP087948,MG945178,MG945463,MH572367,MH572368,MH572377,MH572378,MH572379,MH572459,MH572460,MH572461,MH572462,MH572463,MH572465,MH992180,MK249133,MK249138,MK249199,MK249207,MK249208,MK249228,MK249232,MK765579,MK765582,MK765639,MK765642,MK765643,MK765644,MK765646,MN311488,MN311489,MN311490,MN311491,MZ364242,OL617032,OL617033                                                                         |
| VC_1108_0 | KM589508,KT264808,KT264809,KT264810,MH992165,MK249127,MK249128,MK249129,MK249139,MK249149,MK249150,MK249153,MK249154,MK249155,MK249158,MK249162,MK249163,MK249166,MK249168,MK249174,MK249176,MK249178,MK249180,MK249188,MK249192,MK249194,MK249195,MK249196,MK249198,MK249204,MK249212,MK249214,MK249219,MN862338,MZ364222,MZ364223,MZ364232,MZ364248,MZ364254,MZ364255,MZ364261,MZ364262,MZ364264,MZ364265,MZ364268,MZ364269,MZ364271,MZ364272,MZ364273,MZ364275,MZ364276,MZ364278 |
| VC_1109_0 | MK249132,MK249205                                                                                                                                                                                                                                                                                                                                                                                                                                                                   |
| VC_111_0  | MZ398135,MZ398136,MZ399596                                                                                                                                                                                                                                                                                                                                                                                                                                                          |
| VC_1110_0 | MK249191,MN862347                                                                                                                                                                                                                                                                                                                                                                                                                                                                   |
| VC_1111_0 | KM589514,MK249222,MZ364231,MZ364280,MZ364284                                                                                                                                                                                                                                                                                                                                                                                                                                        |
| VC_1112_0 | KM589515,KM589516,MT135405,OM869497                                                                                                                                                                                                                                                                                                                                                                                                                                                 |
| VC_1113_0 | MH153807,MH153812                                                                                                                                                                                                                                                                                                                                                                                                                                                                   |
| VC_1113_1 | KX774321                                                                                                                                                                                                                                                                                                                                                                                                                                                                            |
| VC_1114_0 | MH576964,MH576965,MH576968,MH590597,MH590599,MH727564,MK359332,MK359351,MK801722,MN369750,MN369757,MN428060,MN484599,MW291014,MW507134,ON260819,ON260828,ON970579,ON970590,OP021680                                                                                                                                                                                                                                                                                                 |
| VC_1114_1 | OL829978                                                                                                                                                                                                                                                                                                                                                                                                                                                                            |
| VC_1114_2 | MF155946,MT310865,MT684590,MT897905,ON970591                                                                                                                                                                                                                                                                                                                                                                                                                                        |
| VC_1114_3 | KM652554,MF347636,MF347637,MF347638,MF347639,MF358541,MF358542,MK460248,MK494112,MK977711,MN096371,MN369743,MW507136,MZ958750,OK310502,ON108650                                                                                                                                                                                                                                                                                                                                     |
| VC_1114_4 | MN444876                                                                                                                                                                                                                                                                                                                                                                                                                                                                            |
| VC_1114_5 | MT7711976                                                                                                                                                                                                                                                                                                                                                                                                                                                                           |
| VC_1115_0 | MG757153,MK620896                                                                                                                                                                                                                                                                                                                                                                                                                                                                   |
| VC_1115_1 | MT024865,MT024872                                                                                                                                                                                                                                                                                                                                                                                                                                                                   |
| VC_1115_2 | MH590589,MH651172,MW365952,MZ820095,ON456343                                                                                                                                                                                                                                                                                                                                                                                                                                        |
| VC_1115_3 | MK061412,MT114162,MW435853,MZ820093,MZ820094,ON208830                                                                                                                                                                                                                                                                                                                                                                                                                               |
| VC_1115_4 | MH536811,MH536814,MN369754,MT952852                                                                                                                                                                                                                                                                                                                                                                                                                                                 |
| VC_1115_5 | MT684598,MW822145,ON645339                                                                                                                                                                                                                                                                                                                                                                                                                                                          |



|           |                                                                                                                                                                                                                                                                                                                                                                                                                                                                                                                                                                                                                                                                                                                                                                                                                                                    |
|-----------|----------------------------------------------------------------------------------------------------------------------------------------------------------------------------------------------------------------------------------------------------------------------------------------------------------------------------------------------------------------------------------------------------------------------------------------------------------------------------------------------------------------------------------------------------------------------------------------------------------------------------------------------------------------------------------------------------------------------------------------------------------------------------------------------------------------------------------------------------|
| VC_1116_0 | KT365401,KU160651,KU160656,KU160665,KU160668,KU647629,MF189176,MF189177,MF189178,MF324907,MF377441,MF377442,MH825703,MK919479,MN183279,MN183283,MT024868,MT114161,MT310895,MT776811,MT889388,MW862982,OK999980,ON970601                                                                                                                                                                                                                                                                                                                                                                                                                                                                                                                                                                                                                            |
| VC_1117_0 | KM879463,KU160660,KX522650,KX670786,KX670787,KX855961,KX855962,MF185718,MF185721,MF185723,MF185724,MF185725,MF668274,MH744419,MK494107,MN204499,MN204503,MN234234,MN703411                                                                                                                                                                                                                                                                                                                                                                                                                                                                                                                                                                                                                                                                         |
| VC_1118_0 | MT498055,MW601223,MZ747522,OL742560                                                                                                                                                                                                                                                                                                                                                                                                                                                                                                                                                                                                                                                                                                                                                                                                                |
| VC_1119_0 | KP087938,KP087942,MG883726,MG945129,MG945206,MG945670,MG945836,MG945840,MG945846,MH572362,MH572410,MH572411,MH572412,MH572486,MH572521,MH931004,MH992163,MH992164,MH992192,MH992199,MH992202,MH992206,MH992208,MH992214,MH992215,MH992216,MH992217,MH992219,MH992220,MH992222,MK765645,MN862346,MW202445,MW202609,MW202760,MW202819,MZ089752,MZ364224,MZ364225,MZ364227,MZ364277,MZ364279,MZ364283,MZ364285,MZ364286,MZ364291,OL617030,OL617031                                                                                                                                                                                                                                                                                                                                                                                                    |
| VC_112_0  | FR687252,MZ333135,OM513679,OM513680                                                                                                                                                                                                                                                                                                                                                                                                                                                                                                                                                                                                                                                                                                                                                                                                                |
| VC_1121_0 | MH572360,MH572361,MH572409,MH572457,MH572482,MH572483                                                                                                                                                                                                                                                                                                                                                                                                                                                                                                                                                                                                                                                                                                                                                                                              |
| VC_1123_0 | MN379632                                                                                                                                                                                                                                                                                                                                                                                                                                                                                                                                                                                                                                                                                                                                                                                                                                           |
| VC_1124_0 | MH572366,MW202464,MW202671                                                                                                                                                                                                                                                                                                                                                                                                                                                                                                                                                                                                                                                                                                                                                                                                                         |
| VC_1126_0 | MH572287,MH572288,MH572467,MH572496,MH572497,MH572498,MH572499,MH572500                                                                                                                                                                                                                                                                                                                                                                                                                                                                                                                                                                                                                                                                                                                                                                            |
| VC_1127_0 | KT264812,MG945475                                                                                                                                                                                                                                                                                                                                                                                                                                                                                                                                                                                                                                                                                                                                                                                                                                  |
| VC_1128_0 | KP087943,KP087951,KP087957                                                                                                                                                                                                                                                                                                                                                                                                                                                                                                                                                                                                                                                                                                                                                                                                                         |
| VC_1129_0 | KP087953,MH572371,MH572373,MH572380,MK249215                                                                                                                                                                                                                                                                                                                                                                                                                                                                                                                                                                                                                                                                                                                                                                                                       |
| VC_113_0  | AB716666,GQ413938,KF765493,KM576124,KP708985,KP708986,KT367886,KT964103,KU666550,KX211991,KX237514,KX587949,KX856662,KY000081,KY385423,KY684082,MF612071,MC972768,MH885472,MK135468,MK562503,MK598851,MK693005,MN101217,MN101219,MN101220,MN116494,MN176572,MN176573,MN380459,MN794000,MN794001,MN794002,MN794003,MT090077,MT197175,MT197176,MT360680,MT559526,MT559527,MT682065,MT701589,MT939252,MW590329,MZ208805,MZ424864,MZ571827,MZ602146,MZ634338,MZ634339,MZ634340,MZ634342,MZ634343,OK562429,OK583892,OK583893,OL362278,OL362279,OL474125,OL976437,OL979478,OL979479,OM864357,ON132389,ON146449,ON165415,ON602723,ON602724,ON602725,ON602726,ON602727,ON602728,ON602732,ON602739,ON602740,ON602743,ON602748,ON602752,ON602754,ON602756,ON602757,ON602761,ON602762,ON602767,ON809559,OP114731,OP413829,OU509533,OU509534,OX335379,OX335428 |
| VC_1130_0 | KP087955,MH572364,MH572458                                                                                                                                                                                                                                                                                                                                                                                                                                                                                                                                                                                                                                                                                                                                                                                                                         |
| VC_1131_0 | MH572489,MW202618                                                                                                                                                                                                                                                                                                                                                                                                                                                                                                                                                                                                                                                                                                                                                                                                                                  |
| VC_1132_0 | KP202971,KT001914,MF098558,ON323491                                                                                                                                                                                                                                                                                                                                                                                                                                                                                                                                                                                                                                                                                                                                                                                                                |
| VC_1133_0 | MG592536,MG592554,MG592555,MG592556,MG592591,MG592625                                                                                                                                                                                                                                                                                                                                                                                                                                                                                                                                                                                                                                                                                                                                                                                              |
| VC_1134_0 | KP836355,KP836356                                                                                                                                                                                                                                                                                                                                                                                                                                                                                                                                                                                                                                                                                                                                                                                                                                  |
| VC_1135_0 | MW314851,MW314853,MW314857,MW584149,MW584151,MW584184,MW584193,MW584198,MW584200,MW584205,MW584210                                                                                                                                                                                                                                                                                                                                                                                                                                                                                                                                                                                                                                                                                                                                                 |
| VC_1136_0 | KU963250,MF919514,MG812487,MH153809,MH450129,MH479924,MH651166,MH651168,MH976506,MH976507,MH976508,MH976509,MH976510,MH976511,MH976512,MH976513,MH976514,MH976518,MH976519,MK937594,MK937601,MK967396,MK977702,MN329673,MN329677,MT498035,MT639640                                                                                                                                                                                                                                                                                                                                                                                                                                                                                                                                                                                                 |
| VC_1138_0 | MT723934,MT723937,MT723941,MW822146,MW924645,MZ322015,MZ681510,ON081332,ON456336,ON637761,ON724014,OP172877,OP434456                                                                                                                                                                                                                                                                                                                                                                                                                                                                                                                                                                                                                                                                                                                               |
| VC_1139_0 | KU963253,MH669000,MK937607,MK937611,MN586026,MN586028,MN586047,MT498036,MW314847,MZ322009,MZ322020,ON392159,ON456337,ON456349,ON755186,OP068342                                                                                                                                                                                                                                                                                                                                                                                                                                                                                                                                                                                                                                                                                                    |
| VC_114_0  | KR063280,MK279853,MN586022,MZ820089,ON755184                                                                                                                                                                                                                                                                                                                                                                                                                                                                                                                                                                                                                                                                                                                                                                                                       |
| VC_1141_0 | KF319020,KM819694,MG575418,MG575419,MK387869,MW358930,OL416096,OM234793                                                                                                                                                                                                                                                                                                                                                                                                                                                                                                                                                                                                                                                                                                                                                                            |
| VC_1141_1 | MK814760,MK894436,MN484601,OP297539                                                                                                                                                                                                                                                                                                                                                                                                                                                                                                                                                                                                                                                                                                                                                                                                                |
| VC_1142_0 | KR063281                                                                                                                                                                                                                                                                                                                                                                                                                                                                                                                                                                                                                                                                                                                                                                                                                                           |
| VC_1142_1 | MN234206,MN234211                                                                                                                                                                                                                                                                                                                                                                                                                                                                                                                                                                                                                                                                                                                                                                                                                                  |
| VC_1143_0 | OK040794                                                                                                                                                                                                                                                                                                                                                                                                                                                                                                                                                                                                                                                                                                                                                                                                                                           |
| VC_1143_1 | MN908685,MZ150783                                                                                                                                                                                                                                                                                                                                                                                                                                                                                                                                                                                                                                                                                                                                                                                                                                  |
| VC_1143_2 | OK040793,ON637770                                                                                                                                                                                                                                                                                                                                                                                                                                                                                                                                                                                                                                                                                                                                                                                                                                  |
| VC_1143_3 | OK040790                                                                                                                                                                                                                                                                                                                                                                                                                                                                                                                                                                                                                                                                                                                                                                                                                                           |
| VC_1144_0 | OP068343                                                                                                                                                                                                                                                                                                                                                                                                                                                                                                                                                                                                                                                                                                                                                                                                                                           |
| VC_1146_0 | KR704913,KR704915                                                                                                                                                                                                                                                                                                                                                                                                                                                                                                                                                                                                                                                                                                                                                                                                                                  |
| VC_1147_0 | MG945359,MG945431,MG945700                                                                                                                                                                                                                                                                                                                                                                                                                                                                                                                                                                                                                                                                                                                                                                                                                         |
| VC_1148_0 | KT264770,MG883711,MG945134,MG945399,MG945707,MK496726                                                                                                                                                                                                                                                                                                                                                                                                                                                                                                                                                                                                                                                                                                                                                                                              |
| VC_115_0  | KT264775,MG883718,MG945386,MG945775                                                                                                                                                                                                                                                                                                                                                                                                                                                                                                                                                                                                                                                                                                                                                                                                                |
| VC_1150_0 | AB720063,AP008979,AY299121,DQ777876,EU717894,MW934263,MZ701794,OK258140,OM913894                                                                                                                                                                                                                                                                                                                                                                                                                                                                                                                                                                                                                                                                                                                                                                   |
| VC_1151_0 | MG945489,MT135282                                                                                                                                                                                                                                                                                                                                                                                                                                                                                                                                                                                                                                                                                                                                                                                                                                  |
| VC_1152_0 | MK496719,MK496738                                                                                                                                                                                                                                                                                                                                                                                                                                                                                                                                                                                                                                                                                                                                                                                                                                  |
| VC_1153_0 | KT264796,KT264797,MG883722,MG945286,MG945310,MG945311,MG945312,MG945319,MG945338,MG945347,MG945385,MG945389,MG945410,MG945416,MG945437,MG945538,MG945600,MG945627,MG945635,MG945639,MG945672,MG945746,MG945767,MG945858,OM869558,OM869663                                                                                                                                                                                                                                                                                                                                                                                                                                                                                                                                                                                                          |
| VC_1155_0 | MG945131,MG945742                                                                                                                                                                                                                                                                                                                                                                                                                                                                                                                                                                                                                                                                                                                                                                                                                                  |
| VC_1156_0 | KT264776,MG883719,MG945139,MG945339,MG945394,MG945403,MG945542,MG945550,MG945645,MG945736,MG945740,MG945771,MG945819,OP209174                                                                                                                                                                                                                                                                                                                                                                                                                                                                                                                                                                                                                                                                                                                      |
| VC_1160_0 | KT264781,MG945481,MG945807,MT135256,MT135266                                                                                                                                                                                                                                                                                                                                                                                                                                                                                                                                                                                                                                                                                                                                                                                                       |
| VC_1162_0 | MK496751,MK496754,OM869507                                                                                                                                                                                                                                                                                                                                                                                                                                                                                                                                                                                                                                                                                                                                                                                                                         |
| VC_1163_0 | MG945418,MG945549,MG945747                                                                                                                                                                                                                                                                                                                                                                                                                                                                                                                                                                                                                                                                                                                                                                                                                         |
| VC_1164_0 | OM869631                                                                                                                                                                                                                                                                                                                                                                                                                                                                                                                                                                                                                                                                                                                                                                                                                                           |
| VC_1165_0 | MG945529,MG945568,MG945717,MG945739,MT135265                                                                                                                                                                                                                                                                                                                                                                                                                                                                                                                                                                                                                                                                                                                                                                                                       |
| VC_1166_0 | KT264785,KX513873,MG945186,MG945569,MG945689,MG945797,MG945870,MN379630,MN379640,MT135351                                                                                                                                                                                                                                                                                                                                                                                                                                                                                                                                                                                                                                                                                                                                                          |
| VC_1167_0 | KT264784,KX513864                                                                                                                                                                                                                                                                                                                                                                                                                                                                                                                                                                                                                                                                                                                                                                                                                                  |
| VC_1169_0 | KT264798,KT264799,KT264800,KT264801,MG945135,MG945136,MG945157,MG945867,MT135258,MT135268                                                                                                                                                                                                                                                                                                                                                                                                                                                                                                                                                                                                                                                                                                                                                          |
| VC_117_0  | KT264788,KT264789,KT264790,MG945138,MG945381,MG945382,MG945780,MT135259                                                                                                                                                                                                                                                                                                                                                                                                                                                                                                                                                                                                                                                                                                                                                                            |
| VC_1171_0 | MG592523,OX241425                                                                                                                                                                                                                                                                                                                                                                                                                                                                                                                                                                                                                                                                                                                                                                                                                                  |
| VC_1173_0 | KT264794                                                                                                                                                                                                                                                                                                                                                                                                                                                                                                                                                                                                                                                                                                                                                                                                                                           |
| VC_1174_0 | KT264795,MG945624,MG945738                                                                                                                                                                                                                                                                                                                                                                                                                                                                                                                                                                                                                                                                                                                                                                                                                         |
| VC_1176_0 | MG641184,MZ089778,OM869517,OM869640                                                                                                                                                                                                                                                                                                                                                                                                                                                                                                                                                                                                                                                                                                                                                                                                                |
| VC_1177_0 | MK496714,MK496779,MK496792,MK496803,MZ089777,OM869545                                                                                                                                                                                                                                                                                                                                                                                                                                                                                                                                                                                                                                                                                                                                                                                              |
| VC_1178_0 | KT264803,MG945142                                                                                                                                                                                                                                                                                                                                                                                                                                                                                                                                                                                                                                                                                                                                                                                                                                  |
| VC_1179_0 | KT264802,MG945620,MG945741                                                                                                                                                                                                                                                                                                                                                                                                                                                                                                                                                                                                                                                                                                                                                                                                                         |
| VC_118_0  | KT264805,MG945519,MG945693,MG945809                                                                                                                                                                                                                                                                                                                                                                                                                                                                                                                                                                                                                                                                                                                                                                                                                |
| VC_1180_0 | AB720064,LR743523,LR743528,LR743529,LR743531,MW802488,MW822535,MW822536,MW822537,MW822538,MW822539,OK913679,OK913680                                                                                                                                                                                                                                                                                                                                                                                                                                                                                                                                                                                                                                                                                                                               |
| VC_1181_0 | KT264806,MG945320,MG945561,MG945721                                                                                                                                                                                                                                                                                                                                                                                                                                                                                                                                                                                                                                                                                                                                                                                                                |
| VC_1183_0 | KT264820,KT264821,MG945644,MK765602                                                                                                                                                                                                                                                                                                                                                                                                                                                                                                                                                                                                                                                                                                                                                                                                                |
| VC_1185_0 | KT264816,KT264817                                                                                                                                                                                                                                                                                                                                                                                                                                                                                                                                                                                                                                                                                                                                                                                                                                  |
| VC_1186_0 | MG883714,MG945364,MG945525,MG945719,MG945805,MT135337,MT135424                                                                                                                                                                                                                                                                                                                                                                                                                                                                                                                                                                                                                                                                                                                                                                                     |
| VC_1187_0 | OM869513,OM869516,OM869519,OM869634,OM869637                                                                                                                                                                                                                                                                                                                                                                                                                                                                                                                                                                                                                                                                                                                                                                                                       |
| VC_1188_0 | MG945234,MG945405,MG945827                                                                                                                                                                                                                                                                                                                                                                                                                                                                                                                                                                                                                                                                                                                                                                                                                         |
| VC_1189_0 | KT264822,KT264830,MK496745                                                                                                                                                                                                                                                                                                                                                                                                                                                                                                                                                                                                                                                                                                                                                                                                                         |
|           | KT264823,KT264824,KT264825,MG945179,MG945357,MG945413,MG945506,MG945507,MG945609,MG945676,MG945706,MG945764,MG945817,MT135267,MT135271,MT135281                                                                                                                                                                                                                                                                                                                                                                                                                                                                                                                                                                                                                                                                                                    |



VC\_119\_0 AB757800,AB757801,JX880072,KX365747,MH059635,MK574011,MW202665,MW202744,OL959999  
VC\_1190\_0 MCG945441,MCG945487,MCG945505,MT135255,MT135275  
VC\_1191\_0 KT264828,MCG945228,MCG945426,MCG945726,MCG945754,MCG945816,OP549870,OP549873,OP549877  
VC\_1192\_0 MCG945204,MCG945727,MCG945785,MCG945810  
VC\_1193\_0 KT264831,MN379641  
VC\_1194\_0 KT264834,MCG945678  
VC\_1196\_0 MN988521,MN988522,MN988523,MN988524,MN988525,MN988559,MN988561  
VC\_1196\_1 MN988560  
VC\_1197\_0 KT755656,MH431938,MH454076,MH454080,MH460824,MH460825,MH460826,MH460827  
VC\_1198\_0 KT876724,KT876726,KU599877,KU599878,KU599879,KU599886,MK764441,MK764449,MW421577,MW421578,MW421579,MW421580,MW442825,MW442826,MW442827,MW442828,MW442829,MW442830,MW448539,MW448540,MW448541,OK340820,OK340821,OK340822  
VC\_1199\_0 MH576962,MK620894,MW291021  
VC\_1199\_1 MH744418,MT310898  
VC\_12\_0 AP008954,AY954960,AY954961,CP062422,CP062462,CP071049,DQ530362,JQ973847,KJ140076,KJ452291,KP209285,KP893289,KT344895,MK290764,MK618716,MW238767,OM439663,OM439669,OM439672,OM439673,OM439674  
VC\_12\_1 MG543995,MG564297  
VC\_12\_2 AB370268,AP001553,AY954962,AY954963,AY954964,AY954965,AY954966,AY954967,AY954968,DQ089299,JX013863,JX094501,KC595279,KP893290,KR709302,KR709303,MK211557,MN904510,ON571632  
VC\_120\_0 AB746912,LC545443,LC545444  
VC\_1200\_0 KU160640,KU160643,KU160645,KU160648,KU160649,KU160652,KU160653,KU160659,KU160661,KU160662,KU160671,KU160672,KX576640,KX576641,KX621004,KX621005,KX688102,KX688103,MF140400,MF140404,MF140407,MF140424,MF140425,MF668285,MG198779,MG198781,MG198782,MG210949,MH450117,MH450118,MH450121,MH450131,MH744421,MK112526,MK112528,MK112529,MK112531,MK112535,MK112538,MK279844,MK279845,MK279847,MK279851,MK279854,MK279856,MK279860,MK279862,MK279863,MK279867,MK279868,MK279869,MK279872,MK279874,MK279875,MK279876,MK279880,MK279884,MK279886,MK279892,MK279896,MK279901,MK279907,MK660714,MK814749,MK919476,MK919484,MN586061,MN735429,MN813680,MT498045,MT498050,MW314848,OP434444  
VC\_1201\_0 KX557278,MT771339  
VC\_1202\_0 MK016495,MK016497,MK737942,MN369765,MT310855,MT498057,MZ150782,MZ747515,ON260821,ON970583  
VC\_1203\_0 MG839027,MG925343,MG925345,MG925347,MG944216,MG944218,MG944226,MH513982,MH590604,MH590606,MK308637,MK620901,MK620904,MK814762,MK894432,MK937602,MN096367,MN096378,MN284901,MN310543,MT553340,MT657343,MT657344,MZ005670,OK318961,ON526972,ON970571,OP068339  
VC\_1204\_0 KU160641,KU160646,MF038790,MF038791,MF140401,MF140423,MF140432,MH399789,MH450115,MH450125,MH479926,MH825711,MN234168,MN234194,MN234221,MN284902,MN703412,MW055912,MZ209303,MZ2274309,OK310503,ON456335,ON456340,ON645338,OP434462  
VC\_1206\_0 OM913586,ON970564,ON970608  
VC\_1207\_0 KU160644,MF140397,MH834595,MH834606,MH834608,MH834609,MH834616,MH834618,MH834620,MH834624,MN234214,MN484600,MN703409,MT889373,MT952853,MW507131,ON260822,ON970604,OP297550,OP297552  
VC\_1208\_0 KU160650,MF668266,MF668273,MF668279,MH450114,ON337195  
VC\_1209\_0 MW507126,MW590223  
VC\_121\_0 LC545445,LC545446  
VC\_1210\_0 KU160654,KU160664,MF140418,MF140427,MF140434,MG099950,MN585972  
VC\_1211\_0 MN586021,MT889394,OP434452  
VC\_1211\_1 KU160669,KU160673,MW712735  
VC\_1211\_2 MW862992,OM818331  
VC\_1212\_0 MH153803,MH153813,MN183284,MT114166,MT639641,MT657333,MW365946,MW365949,MW365950,MW712724,MW712727,MW712728,MW924638,MZ322011,MZ322018,OM203157,OP068331,OP068332,OP068336,OP068337,OP068344  
VC\_1214\_0 KU220356,MK605242,MK605243,MK605244,MK605245,MK605246  
VC\_1215\_0 KU234532,KU234533,MT426122,MZ078141  
VC\_1216\_0 KU963246,KU963247,MG099941,MH271295,MK279911,MK279912,MK359313,MK801734,MK875797,MN586055,MT771342,MT818424,MW055908,MW291013,MW507130,MW822147,MZ150788,MZ171371,MZ681509,OM203160,ON645343,OP297544  
VC\_1217\_0 KU963251,KU963254,KU963259,KU998236,KU998248,KX557274,KX557275,MF919521,MH020241,MH153808,MH536818,MH576969,MK501729,MK501730,MK801721,MK801724,MK814757,MK864263,MK878896,MK919470,MK967389,MN010762,MN062704,MN096365,MN234161,MN234179,MN369740,  
VC\_1218\_0 MN585963,MN586031,MT553336,MT723935,MT723936,MT723942,MW291016,MW601225,MZ150785,MZ622164,ON724008,ON724011,ON724012,ON970567  
VC\_1219\_0 KU963252,KU998235,KX557279,MH479915,MK061410,MK284521,MK878901,MK937599,MK967377,MN813694,MT498059,MT522006,MT771341,MW055901  
VC\_1221\_0 KU998234,KX557286,MH479910,MH479917,MH669015,MK305889,MK814761,MK864264,MK864265,MK864266,MK864267,MK937603,MK967381,MN010760,MN284907,MT310872,MT521998,MT639651,MW507125,MZ005680,MZ150791,MZ622177,ON970602,ON970619  
VC\_1222\_0 KU647626,KU647627,MN586053  
VC\_1222\_0 MK814759,MZ209302,OM818327  
VC\_1223\_0 KU998245,MK524501  
VC\_1223\_1 KU998244,KU998246,KU998247,KX557276,MF919520,MF919537,MK376956,MK376959,MT498054,MZ388552  
VC\_1224\_0 KX557272,MK977705,MN908691,MT657339  
VC\_1224\_1 MH590603  
VC\_1225\_0 MH479913,MH479925,MK919478,MN586014,MN813698,MW601220  
VC\_1226\_0 KX557282,MK524505,MK814750,MW862986,ON724009  
VC\_1228\_0 KX620750,KX620751,KX620753,KX620754  
VC\_123\_0 JQ177061,JQ177064,KJ572844,MN379460  
VC\_1232\_0 MT344103,MT344104,MT344105  
VC\_1233\_0 KX455876,KY290947,KY290949,KY290950,KY290952,MH179470,MH179471,MH179479,MT276994  
VC\_1234\_0 MCG92484,MG592485  
VC\_1235\_0 KX513871,MG945160,MG945185  
VC\_1236\_0 MT135371,MT135422,MT135432  
VC\_1237\_0 MCG945352,MG945735,MG945752  
VC\_1238\_0 MCG945210,MCG945327,MCG945623,MT135440,MT135446  
VC\_124\_0 MCG92400,MCG92422,MCG92425,MCG92448,MCG92486  
VC\_124\_1 MCG92434  
VC\_1240\_0 MCG945748,MG945799,MG945800  
VC\_1241\_0 KX513875,MG883712,MG945284,MG945502,MG945616,MG945794,MK496693,MK496774,MZ089789,OM869564,OM869565,OM869570,OM869709  
VC\_1243\_0 MH727560,MH926061,MK937613,MK977706,MK977710,MK977712,MK977714,MK977715  
VC\_1244\_0 MF197383,MH271317,MN234233,OP172878  
VC\_1245\_0 KY817360,OL656105  
VC\_1246\_0 LC035386,LC210520  
VC\_1247\_0 LC644975,LC644976  
VC\_1248\_0 MT740726,MT740743,MT740745  
VC\_1249\_0 MH271298,MH271308,MH271320,MK880124,MT952845,MW862981,OK040779,ON970568  
VC\_125\_0 JX866719,KJ021043,KX237516,MF663761,MG197810,MG432137,MK521906,MK685667,MK798142,MN689778,MT559528,MT757392,MT894004,MZ374361,MZ398021,MZ398245,MZ504995,OK499978,ON806804,ON602758,ON807605,ON809560,OP114730  
VC\_1250\_0 MH834610,MH834619,MH834629,MK061413,MN703413,MN813676,MN908689,MT024869,MT024871,MT639653,MT889366,MT889375,MT889376,MT897906,MW055910,MZ005682,MZ681506,MZ747516,MZ820087,OK040777,OL455896,OL549188,OL549189,OL549191,OL549192,ON208833,ON528933,ON970616,OP434455



|           |                                                                                                                                                                                                                                                                                                                                                                                                                                                                                                                                                                                                                                                                                                                                                          |
|-----------|----------------------------------------------------------------------------------------------------------------------------------------------------------------------------------------------------------------------------------------------------------------------------------------------------------------------------------------------------------------------------------------------------------------------------------------------------------------------------------------------------------------------------------------------------------------------------------------------------------------------------------------------------------------------------------------------------------------------------------------------------------|
| VC_1251_0 | LR535901,LR535903,LR535904,LR535905,LR535906,LR535907,LR535908,LR535911,LR535912,LR535913,LR535917                                                                                                                                                                                                                                                                                                                                                                                                                                                                                                                                                                                                                                                       |
| VC_1257_0 | MK250021,MK250023                                                                                                                                                                                                                                                                                                                                                                                                                                                                                                                                                                                                                                                                                                                                        |
| VC_1257_1 | MK250020,MK250022,MK250024,MK250025,MK250026,MK250027,MK250028                                                                                                                                                                                                                                                                                                                                                                                                                                                                                                                                                                                                                                                                                           |
| VC_1257_2 | MK250015,MK250016,MK250017,MK250018                                                                                                                                                                                                                                                                                                                                                                                                                                                                                                                                                                                                                                                                                                                      |
| VC_1257_3 | MK250019,MK250029                                                                                                                                                                                                                                                                                                                                                                                                                                                                                                                                                                                                                                                                                                                                        |
| VC_126_0  | KF977490,MW960031                                                                                                                                                                                                                                                                                                                                                                                                                                                                                                                                                                                                                                                                                                                                        |
| VC_1268_0 | MF101922,MH015251                                                                                                                                                                                                                                                                                                                                                                                                                                                                                                                                                                                                                                                                                                                                        |
| VC_1269_0 | MF443783,MF443784                                                                                                                                                                                                                                                                                                                                                                                                                                                                                                                                                                                                                                                                                                                                        |
| VC_127_0  | AB775548,GU903191,KM360178,KX2231828,KY705409,MH252365,MT012302,MT161381,MT161382,MT161383,MT161384,MT375042,MT613935,MT701586,MT708550,MZ345003,ON853583                                                                                                                                                                                                                                                                                                                                                                                                                                                                                                                                                                                                |
| VC_1271_0 | MF580955,MF580957,MF580958                                                                                                                                                                                                                                                                                                                                                                                                                                                                                                                                                                                                                                                                                                                               |
| VC_1272_0 | MF580956,MF580959,MF580960                                                                                                                                                                                                                                                                                                                                                                                                                                                                                                                                                                                                                                                                                                                               |
| VC_1273_0 | MF580961,MF580962,MF629150                                                                                                                                                                                                                                                                                                                                                                                                                                                                                                                                                                                                                                                                                                                               |
| VC_1275_0 | MF979562,MK080312,MT074429,MT074440                                                                                                                                                                                                                                                                                                                                                                                                                                                                                                                                                                                                                                                                                                                      |
| VC_1276_0 | MG214764,MW202596,OL617037                                                                                                                                                                                                                                                                                                                                                                                                                                                                                                                                                                                                                                                                                                                               |
| VC_1277_0 | MG269973,MW202566                                                                                                                                                                                                                                                                                                                                                                                                                                                                                                                                                                                                                                                                                                                                        |
| VC_1278_0 | MG515223,MG518519,MG518520,MG663582,MG663583,MG663584,MG663585,MG663586,MH155868,MK112550,MN119376,MN284894,MN994275,MT684596,MZ622160,OL455897,ON108647,ON970569,OP021678                                                                                                                                                                                                                                                                                                                                                                                                                                                                                                                                                                               |
| VC_1279_0 | MG592394,MG592402,MG592427,MG592455                                                                                                                                                                                                                                                                                                                                                                                                                                                                                                                                                                                                                                                                                                                      |
| VC_128_0  | EF057797,EU399241                                                                                                                                                                                                                                                                                                                                                                                                                                                                                                                                                                                                                                                                                                                                        |
| VC_1280_0 | MG592533,MG592560                                                                                                                                                                                                                                                                                                                                                                                                                                                                                                                                                                                                                                                                                                                                        |
| VC_1281_0 | MK373772,OP136151                                                                                                                                                                                                                                                                                                                                                                                                                                                                                                                                                                                                                                                                                                                                        |
| VC_1282_0 | MG592596,MW824384,MW824385,MW824386,MW824395,MW824396,MW824397                                                                                                                                                                                                                                                                                                                                                                                                                                                                                                                                                                                                                                                                                           |
| VC_1283_0 | OM869552,OM869646                                                                                                                                                                                                                                                                                                                                                                                                                                                                                                                                                                                                                                                                                                                                        |
| VC_1285_0 | MG641185,MG945497,MG945667                                                                                                                                                                                                                                                                                                                                                                                                                                                                                                                                                                                                                                                                                                                               |
| VC_1286_0 | MG641188,MG945130,MG945256,MG945457,MG945557,MG945725,MG945757,MN379637,MN379647,MT135339,MT135348,MT135361,MT135384,MT135409,MT135435,OL617023                                                                                                                                                                                                                                                                                                                                                                                                                                                                                                                                                                                                          |
| VC_1287_0 | MG670586,MH045566,MH045567,MH045568,MH509447,MH834599,MH834602,MH834604,MH834626,MK814753,MK937598,MK937610,MN062714,MN062717,MN183281,MN329675,MT024860,MT310853,MT310896,MT639649,MT818427,MT889365,MT889372,MT889389,MT889392,MW601221                                                                                                                                                                                                                                                                                                                                                                                                                                                                                                                |
| VC_129_0  | MF663786                                                                                                                                                                                                                                                                                                                                                                                                                                                                                                                                                                                                                                                                                                                                                 |
| VC_129_1  | OL614104                                                                                                                                                                                                                                                                                                                                                                                                                                                                                                                                                                                                                                                                                                                                                 |
| VC_129_2  | MT711888                                                                                                                                                                                                                                                                                                                                                                                                                                                                                                                                                                                                                                                                                                                                                 |
| VC_1296_0 | MG839015,MG839016,MG839017,MG839018,MG839020,MG839021,MG839022,MG839023,MG839026,MG839028,MG839029,MG920061,MG925352,MG944219,MG944222,MG962360,MG962367,MH045554,MH045558,MH045560,MH045562,MH045563,MH045564,MH045565,MH153802,MH153805,MH153806,MH153811,MH513981,MK620895,MK620902,MK620903,MK620905,MK757447,MK919471,MK967388,MK967391,MK967394,MK977697,MN062702,MN062709,MN062713,MN234163,MN234177,MN234181,MN234204,MN234222,MN369737,MN617840,MN735430,MN735435,MN807246,MN892483,MT024864,MT310851,MT310856,MT310861,MT310866,MT310873,MT451985,MT498049,MT553339,MT553341,MT553343,MT771350,MT952846,MT986026,MT986027,MW055911,MW291026,MW435859,MZ005684,MZ958749,OK310506,ON260823,ON337194,ON456354,ON970581,ON970605,ON970606,OP021683 |
| VC_1302_0 | MG883710,MG945464                                                                                                                                                                                                                                                                                                                                                                                                                                                                                                                                                                                                                                                                                                                                        |
| VC_1303_0 | MG883713,MT135394                                                                                                                                                                                                                                                                                                                                                                                                                                                                                                                                                                                                                                                                                                                                        |
| VC_1304_0 | MG883720,MG945384,MG945482,MG945692,MG945697,MG945698,MG945734                                                                                                                                                                                                                                                                                                                                                                                                                                                                                                                                                                                                                                                                                           |
| VC_1306_0 | MG945724,MT135383,MT135403,MT135456                                                                                                                                                                                                                                                                                                                                                                                                                                                                                                                                                                                                                                                                                                                      |
| VC_1307_0 | MG883724,MG945625,MG945629,MG945632,MG945633                                                                                                                                                                                                                                                                                                                                                                                                                                                                                                                                                                                                                                                                                                             |
| VC_1308_0 | MG945128,MG945159,MG945188,MG945229,MG945255,MG945323,MG945332,MG945401,MG945685,MG945745,MG945774,MG945803,MG945829,MT135336,MT135441                                                                                                                                                                                                                                                                                                                                                                                                                                                                                                                                                                                                                   |
| VC_1309_0 | MG945544,MG945723,MT135439                                                                                                                                                                                                                                                                                                                                                                                                                                                                                                                                                                                                                                                                                                                               |
| VC_131_0  | AF493143,KJ507099,KR091952,KU064779,KY798120,KY798121,KY971611,LC730319,LN889756,LN889995,LN913017,MG250485,MG775258,MN729595,MN729596,MN729597,MN729598,MN729599,MN729600,MT104465,MT104466,MT711889,MT711890,MW812345,MZ501272,MZ598487,MZ826344,MZ826345,MZ826346,MZ826347,MZ826348,MZ826349,MZ826351,MZ826352,MZ826354,OK523998,OK523999,OL581611,OM256450,OM282085,OM471789,OM630590,ON189046                                                                                                                                                                                                                                                                                                                                                       |
| VC_1310_0 | MG945414,MG945445,MG945578,MG945611,MT135367,MT135433                                                                                                                                                                                                                                                                                                                                                                                                                                                                                                                                                                                                                                                                                                    |
| VC_1313_0 | MG945241,MG945276,MG945448,MG945643                                                                                                                                                                                                                                                                                                                                                                                                                                                                                                                                                                                                                                                                                                                      |
| VC_1314_0 | MG945140,MG945257,MG945449,MG945458,MG945662,MG945815                                                                                                                                                                                                                                                                                                                                                                                                                                                                                                                                                                                                                                                                                                    |
| VC_1315_0 | MG945580,MG945804,MG945909                                                                                                                                                                                                                                                                                                                                                                                                                                                                                                                                                                                                                                                                                                                               |
| VC_1316_0 | MG945166,MG945208,MG945329,MG945365,MG945512,MG945540,MG945687,MT135329                                                                                                                                                                                                                                                                                                                                                                                                                                                                                                                                                                                                                                                                                  |
| VC_1317_0 | MG945165,MT135354                                                                                                                                                                                                                                                                                                                                                                                                                                                                                                                                                                                                                                                                                                                                        |
| VC_1318_0 | MG945177,MG945349,MG945411,MG945462,MG945495                                                                                                                                                                                                                                                                                                                                                                                                                                                                                                                                                                                                                                                                                                             |
| VC_1319_0 | MN311487,MN311492                                                                                                                                                                                                                                                                                                                                                                                                                                                                                                                                                                                                                                                                                                                                        |
| VC_132_0  | AB775549,FR823298,GU583987,JX173487,KP025626,KX431888,KX449361,KX449362,KX449363,MH179472,MH179475,MH179478,MH268168,MK033137,MT094431,MT711887,OK094519,OM131411,ON109291                                                                                                                                                                                                                                                                                                                                                                                                                                                                                                                                                                               |
| VC_1320_0 | MG945181,MG945211,MG945232,MG945340,MG945553,MG945718,MG945783,MT135261,MT135334,MZ089771                                                                                                                                                                                                                                                                                                                                                                                                                                                                                                                                                                                                                                                                |
| VC_1321_0 | MG945183,MG945314                                                                                                                                                                                                                                                                                                                                                                                                                                                                                                                                                                                                                                                                                                                                        |
| VC_1322_0 | MG945261,MG945420,MG945470,MG945518,MK249148,MK496685                                                                                                                                                                                                                                                                                                                                                                                                                                                                                                                                                                                                                                                                                                    |
| VC_1324_0 | MG945189,MG945275,MG945408,MG945848,MG945852                                                                                                                                                                                                                                                                                                                                                                                                                                                                                                                                                                                                                                                                                                             |
| VC_1325_0 | MG945209,MG945263,MG945279,MG945404,MG945750,MG945776,MG945791                                                                                                                                                                                                                                                                                                                                                                                                                                                                                                                                                                                                                                                                                           |
| VC_1326_0 | MG945212,MG945582,MT135345                                                                                                                                                                                                                                                                                                                                                                                                                                                                                                                                                                                                                                                                                                                               |
| VC_1328_0 | MG945214,MT135380,MT135423                                                                                                                                                                                                                                                                                                                                                                                                                                                                                                                                                                                                                                                                                                                               |
| VC_1329_0 | MG945230,MT135357                                                                                                                                                                                                                                                                                                                                                                                                                                                                                                                                                                                                                                                                                                                                        |
| VC_133_0  | HE600015,KJ716335,KM209228,KM209270,KM209320,KY942056,KY942057,MG266157,MH807812,MH807820,MN788369,MN813048,MN813049,MN813050,MN813051,MN813052,MN813053                                                                                                                                                                                                                                                                                                                                                                                                                                                                                                                                                                                                 |
| VC_133_1  | MW650886,OL656110,ON184125,ON184126,ON212266,ON862890                                                                                                                                                                                                                                                                                                                                                                                                                                                                                                                                                                                                                                                                                                    |
| VC_133_2  | FJ373894,JX181829,LC373201,MK509462,MT078988,OL615011,OL615013                                                                                                                                                                                                                                                                                                                                                                                                                                                                                                                                                                                                                                                                                           |
| VC_133_3  | MT857002                                                                                                                                                                                                                                                                                                                                                                                                                                                                                                                                                                                                                                                                                                                                                 |
| VC_1330_0 | MG945235,MG945392,MT135388,MT135443,MT135462                                                                                                                                                                                                                                                                                                                                                                                                                                                                                                                                                                                                                                                                                                             |
| VC_1331_0 | MG945236,MG945822,MT135358,MT135377,MT135426,MT135427                                                                                                                                                                                                                                                                                                                                                                                                                                                                                                                                                                                                                                                                                                    |
| VC_1332_0 | MG945567,MG945631                                                                                                                                                                                                                                                                                                                                                                                                                                                                                                                                                                                                                                                                                                                                        |
| VC_1333_0 | MG945252,MG945584,MN379645,OM869494                                                                                                                                                                                                                                                                                                                                                                                                                                                                                                                                                                                                                                                                                                                      |
| VC_1336_0 | MZ089808                                                                                                                                                                                                                                                                                                                                                                                                                                                                                                                                                                                                                                                                                                                                                 |
| VC_1337_0 | MG945425,MG945789,MT135415                                                                                                                                                                                                                                                                                                                                                                                                                                                                                                                                                                                                                                                                                                                               |
| VC_1338_0 | MG945258,MG945434,MT135434,MT135451                                                                                                                                                                                                                                                                                                                                                                                                                                                                                                                                                                                                                                                                                                                      |
| VC_1339_0 | MK765572,OM869521                                                                                                                                                                                                                                                                                                                                                                                                                                                                                                                                                                                                                                                                                                                                        |
| VC_134_0  | KP037007,MG973030                                                                                                                                                                                                                                                                                                                                                                                                                                                                                                                                                                                                                                                                                                                                        |



|           |                                                                                                                                                                                                                                           |
|-----------|-------------------------------------------------------------------------------------------------------------------------------------------------------------------------------------------------------------------------------------------|
| VC_134_1  | JX878496,KX452697,MF285619,MH929319                                                                                                                                                                                                       |
| VC_134_2  | AB797215,KX147096,KY073123,MG428990,MG428991,MG770379,MK373783,MN045230,MN478483,MZ634341,ON202820,ON323462,ON399185,OX335402,OX335403,OX335405,OX335416                                                                                  |
| VC_1340_0 | MG945278,MG945285,MG945492,MG945605,MG945751,MG945812,MG945825                                                                                                                                                                            |
| VC_1341_0 | MG945280,MK765649,OM869499,OM869500                                                                                                                                                                                                       |
| VC_1343_0 | MG945309,MG945433                                                                                                                                                                                                                         |
| VC_1344_0 | MK765552,MK765553,MK765556,MK765560,MK765562,MK765565,MK765591,MK765592,MK765593,MK765596,MK765606,MK765607,MK765609,MK765611,MK765612,MK765613,MK765615,MK765633,MK765648,MK765651,MK765657,MK765658,MK765660,MK765666,MT135276,MT135425 |
| VC_1346_0 | MG945316,MG945344,MG945468,MG945524,MG945556,MG945562,MG945579,MG945612,MG945640,MG945668,MG945712,MG945733,MG945806,MG945814,MK765571,MK765574,MK765576,MK765577,MK765580,MT135330,MT135406,MT135431,MT135458,OL617036,OM869623          |
| VC_1347_0 | MG945336,MT135365,MT135448                                                                                                                                                                                                                |
| VC_1348_0 | MG945331,MG945343,MG945490,MG945501,MG945665,MG945729,MG945782                                                                                                                                                                            |
| VC_1349_0 | MG945335,MG945778,MT135385                                                                                                                                                                                                                |
| VC_135_0  | KF669653,KF669654                                                                                                                                                                                                                         |
| VC_135_1  | MG428992                                                                                                                                                                                                                                  |
| VC_135_10 | MH709121,MN871504,MZ375357,MZ375358,OL964736,OL964737,OL964738,OL964746,OL964747,OL964753                                                                                                                                                 |
| VC_135_11 | MW006476,MW006480                                                                                                                                                                                                                         |
| VC_135_12 | MN871494,MN871495                                                                                                                                                                                                                         |
| VC_135_13 | JN126049,LR800396                                                                                                                                                                                                                         |
| VC_135_14 | KX438380,MN953776,OM681507                                                                                                                                                                                                                |
| VC_135_15 | KX765865,MW388005                                                                                                                                                                                                                         |
| VC_135_16 | KJ174318                                                                                                                                                                                                                                  |
| VC_135_17 | MH709120                                                                                                                                                                                                                                  |
| VC_135_18 | KR296692                                                                                                                                                                                                                                  |
| VC_135_19 | MN871500,MT074475                                                                                                                                                                                                                         |
| VC_135_2  | MT074472                                                                                                                                                                                                                                  |
| VC_135_20 | OM367911                                                                                                                                                                                                                                  |
| VC_135_21 | MK972690                                                                                                                                                                                                                                  |
| VC_135_22 | FQ312032,JX128257,JX181828,KJ174317,MH427377,MH688040,MH940212,MN066127,MN342150,MW021753,MW021757,OK322699,OP610151                                                                                                                      |
| VC_135_23 | MT074470                                                                                                                                                                                                                                  |
| VC_135_24 | MF001362                                                                                                                                                                                                                                  |
| VC_135_25 | JN593240                                                                                                                                                                                                                                  |
| VC_135_26 | JN673056                                                                                                                                                                                                                                  |
| VC_135_27 | MG383452                                                                                                                                                                                                                                  |
| VC_135_28 | LR811967,LR811969,MW355478                                                                                                                                                                                                                |
| VC_135_29 | MN871475,MN871501                                                                                                                                                                                                                         |
| VC_135_3  | MH370368,MH370371,MT074469                                                                                                                                                                                                                |
| VC_135_30 | KX245012,KY000003                                                                                                                                                                                                                         |
| VC_135_31 | HQ259103,MH370370,MT074476,MW355450,MW355475,MW355477                                                                                                                                                                                     |
| VC_135_32 | OM688977                                                                                                                                                                                                                                  |
| VC_135_33 | MT499896                                                                                                                                                                                                                                  |
| VC_135_34 | KY630163,KY787213,OK283619                                                                                                                                                                                                                |
| VC_135_35 | MZ156570                                                                                                                                                                                                                                  |
| VC_135_36 | MN871491,MN871492                                                                                                                                                                                                                         |
| VC_135_37 | MN871493                                                                                                                                                                                                                                  |
| VC_135_38 | MN871502                                                                                                                                                                                                                                  |
| VC_135_39 | MT074478                                                                                                                                                                                                                                  |
| VC_135_4  | LR811968                                                                                                                                                                                                                                  |
| VC_135_40 | MH523359                                                                                                                                                                                                                                  |
| VC_135_41 | MT074474                                                                                                                                                                                                                                  |
| VC_135_42 | MN445184                                                                                                                                                                                                                                  |
| VC_135_43 | MN871496,MN871497,MN871498,MN871499                                                                                                                                                                                                       |
| VC_135_44 | MW021754                                                                                                                                                                                                                                  |
| VC_135_45 | MT074471,MT074480                                                                                                                                                                                                                         |
| VC_135_46 | MW021760                                                                                                                                                                                                                                  |
| VC_135_47 | MT074479                                                                                                                                                                                                                                  |
| VC_135_48 | MK972698,MK972699                                                                                                                                                                                                                         |
| VC_135_49 | ON169963                                                                                                                                                                                                                                  |
| VC_135_5  | MG748547                                                                                                                                                                                                                                  |
| VC_135_50 | ON169961                                                                                                                                                                                                                                  |
| VC_135_51 | ON169962                                                                                                                                                                                                                                  |
| VC_135_6  | MH791405                                                                                                                                                                                                                                  |
| VC_135_7  | MT974436                                                                                                                                                                                                                                  |
| VC_135_8  | MT074477                                                                                                                                                                                                                                  |
| VC_135_9  | KP797973,KX171211,MN384979                                                                                                                                                                                                                |
| VC_1350_0 | MG945337,MT135410                                                                                                                                                                                                                         |
| VC_1351_0 | MG945345,MG945818                                                                                                                                                                                                                         |
| VC_1352_0 | MG945348,MG945702,MK496732                                                                                                                                                                                                                |
| VC_1353_0 | MG945350,MG945432,MG945755,MT135447                                                                                                                                                                                                       |
| VC_1354_0 | MG945354,MG945576,MG945637,MK496765,OM869571,OP209176                                                                                                                                                                                     |
| VC_1355_0 | MG945360,MG945478,MG945614                                                                                                                                                                                                                |
| VC_1356_0 | MG945362,MK496704,MK496729,MK496782                                                                                                                                                                                                       |
| VC_1357_0 | MG945395,MG945421,MG945480,MG945539,MG945696,MK496696,MK496711                                                                                                                                                                            |
| VC_1358_0 | OM869651                                                                                                                                                                                                                                  |
| VC_136_0  | MH363700,MK795384,OK428602                                                                                                                                                                                                                |



|           |                                                                                                                                                                                                                                                                                                                                                                                                                                                                                                                                                                                                                                                                                                                       |
|-----------|-----------------------------------------------------------------------------------------------------------------------------------------------------------------------------------------------------------------------------------------------------------------------------------------------------------------------------------------------------------------------------------------------------------------------------------------------------------------------------------------------------------------------------------------------------------------------------------------------------------------------------------------------------------------------------------------------------------------------|
| VC_1360_0 | MG945409,OM869563                                                                                                                                                                                                                                                                                                                                                                                                                                                                                                                                                                                                                                                                                                     |
| VC_1361_0 | MG945412,MG945828                                                                                                                                                                                                                                                                                                                                                                                                                                                                                                                                                                                                                                                                                                     |
| VC_1362_0 | MG945417,MG945419                                                                                                                                                                                                                                                                                                                                                                                                                                                                                                                                                                                                                                                                                                     |
| VC_1363_0 | MG945427,MG945574,MT135411                                                                                                                                                                                                                                                                                                                                                                                                                                                                                                                                                                                                                                                                                            |
| VC_1364_0 | MG945439,MG945628,MK496757,MK765601,MZ089768,OM869696                                                                                                                                                                                                                                                                                                                                                                                                                                                                                                                                                                                                                                                                 |
| VC_1365_0 | MG945749                                                                                                                                                                                                                                                                                                                                                                                                                                                                                                                                                                                                                                                                                                              |
| VC_1366_0 | MZ089804,MZ089807,OM869574,OM869576,OM869577,OM869592,OM869653                                                                                                                                                                                                                                                                                                                                                                                                                                                                                                                                                                                                                                                        |
| VC_1367_0 | MG945469,MG945824,MT135353,MT135400,MT135402                                                                                                                                                                                                                                                                                                                                                                                                                                                                                                                                                                                                                                                                          |
| VC_1368_0 | MG945483,MT135420                                                                                                                                                                                                                                                                                                                                                                                                                                                                                                                                                                                                                                                                                                     |
| VC_1369_0 | MG945500,MG945621,MH572369,MK765583,MT135326,OM869502,OM869505,OM869587,OM869604,OM869633                                                                                                                                                                                                                                                                                                                                                                                                                                                                                                                                                                                                                             |
| VC_137_0  | MG592609,MG592621                                                                                                                                                                                                                                                                                                                                                                                                                                                                                                                                                                                                                                                                                                     |
| VC_137_1  | MW824370,MW824375                                                                                                                                                                                                                                                                                                                                                                                                                                                                                                                                                                                                                                                                                                     |
| VC_1370_0 | OM869510,OM869512                                                                                                                                                                                                                                                                                                                                                                                                                                                                                                                                                                                                                                                                                                     |
| VC_1372_0 | MT135328,OM869626                                                                                                                                                                                                                                                                                                                                                                                                                                                                                                                                                                                                                                                                                                     |
| VC_1373_0 | MG945504,MG945617                                                                                                                                                                                                                                                                                                                                                                                                                                                                                                                                                                                                                                                                                                     |
| VC_1374_0 | MG945533,MT135343,MT135416                                                                                                                                                                                                                                                                                                                                                                                                                                                                                                                                                                                                                                                                                            |
| VC_1375_0 | MZ089798,MZ089799,MZ089800,MZ089801,MZ089803,MZ089805,OM869557,OM869648,OM869654,OM869655,OM869666,OM869684                                                                                                                                                                                                                                                                                                                                                                                                                                                                                                                                                                                                           |
| VC_1378_0 | MT135349,MT135363,MT135392,MT135408                                                                                                                                                                                                                                                                                                                                                                                                                                                                                                                                                                                                                                                                                   |
| VC_138_0  | MH375644,MT366762                                                                                                                                                                                                                                                                                                                                                                                                                                                                                                                                                                                                                                                                                                     |
| VC_1382_0 | MG945554,MG945575                                                                                                                                                                                                                                                                                                                                                                                                                                                                                                                                                                                                                                                                                                     |
| VC_1383_0 | MZ089762                                                                                                                                                                                                                                                                                                                                                                                                                                                                                                                                                                                                                                                                                                              |
| VC_1384_0 | MZ089770,MZ089772,MZ089780,OM869514,OM869529,OM869540,OM869542,OM869544,OM869548,OM869553,OM869589,OM869590,OM869638,OM869707                                                                                                                                                                                                                                                                                                                                                                                                                                                                                                                                                                                         |
| VC_1386_0 | MG945615,MT135372                                                                                                                                                                                                                                                                                                                                                                                                                                                                                                                                                                                                                                                                                                     |
| VC_1387_0 | MH572374,MH572375,MH572376,MH572414,MH572485,MH572522                                                                                                                                                                                                                                                                                                                                                                                                                                                                                                                                                                                                                                                                 |
| VC_1388_0 | MG945619,MH572524,MH992173,MZ364234                                                                                                                                                                                                                                                                                                                                                                                                                                                                                                                                                                                                                                                                                   |
| VC_1389_0 | MK765555,MK765567,MK765600,MK765610,MK765617,MK765659,MK765664                                                                                                                                                                                                                                                                                                                                                                                                                                                                                                                                                                                                                                                        |
| VC_1390_0 | MG945690,MK496692                                                                                                                                                                                                                                                                                                                                                                                                                                                                                                                                                                                                                                                                                                     |
| VC_1391_0 | MG945766,MG945823                                                                                                                                                                                                                                                                                                                                                                                                                                                                                                                                                                                                                                                                                                     |
| VC_1392_0 | MG945769,MG945792                                                                                                                                                                                                                                                                                                                                                                                                                                                                                                                                                                                                                                                                                                     |
| VC_1393_0 | MG945788,MG945795                                                                                                                                                                                                                                                                                                                                                                                                                                                                                                                                                                                                                                                                                                     |
| VC_1394_0 | MG945798,MK765653,MT135350,MT135457                                                                                                                                                                                                                                                                                                                                                                                                                                                                                                                                                                                                                                                                                   |
| VC_1395_0 | OM869639,OM869679                                                                                                                                                                                                                                                                                                                                                                                                                                                                                                                                                                                                                                                                                                     |
| VC_1396_0 | MG945808,MG945849                                                                                                                                                                                                                                                                                                                                                                                                                                                                                                                                                                                                                                                                                                     |
| VC_1397_0 | MG945821                                                                                                                                                                                                                                                                                                                                                                                                                                                                                                                                                                                                                                                                                                              |
| VC_1398_0 | MG945831,MT135370,MT135373,MT135418,MT135430,MT135455,MT135459                                                                                                                                                                                                                                                                                                                                                                                                                                                                                                                                                                                                                                                        |
| VC_1399_0 | OP549864,OP549865,OP549866                                                                                                                                                                                                                                                                                                                                                                                                                                                                                                                                                                                                                                                                                            |
| VC_140_0  | AY855346,LK985322                                                                                                                                                                                                                                                                                                                                                                                                                                                                                                                                                                                                                                                                                                     |
| VC_140_1  | DQ466086,HG531805,LN681541,LN681542                                                                                                                                                                                                                                                                                                                                                                                                                                                                                                                                                                                                                                                                                   |
| VC_1400_0 | MG945832,MT135421                                                                                                                                                                                                                                                                                                                                                                                                                                                                                                                                                                                                                                                                                                     |
| VC_1401_0 | MG945839,MH572484,MZ364252,MZ364293                                                                                                                                                                                                                                                                                                                                                                                                                                                                                                                                                                                                                                                                                   |
| VC_1402_0 | MG945842,MH992159,MH992175,MH992200,MK249218,MK249229,MK249233                                                                                                                                                                                                                                                                                                                                                                                                                                                                                                                                                                                                                                                        |
| VC_1403_0 | MG945850,MT135335,MT135340,MT135376,MT135393                                                                                                                                                                                                                                                                                                                                                                                                                                                                                                                                                                                                                                                                          |
| VC_1404_0 | MT135269,MT135429                                                                                                                                                                                                                                                                                                                                                                                                                                                                                                                                                                                                                                                                                                     |
| VC_1405_0 | MG945857,MG945859,MG945866                                                                                                                                                                                                                                                                                                                                                                                                                                                                                                                                                                                                                                                                                            |
| VC_1406_0 | MH271292,MH271301,MK737941,MK801732,MN497954,MT522001,MT522003,MT639643,MT684591,MT684592,MT818420,MW055903,MW291025,MZ681513,OK040788,OK318957,ON526977,ON637767,ON755183,OP580517                                                                                                                                                                                                                                                                                                                                                                                                                                                                                                                                   |
| VC_1407_0 | MH045557,MH045561,MH371111,MH371118,MH371124,MH399783,MH576963,MH651181,MH744416,MH779512,MH825700,MK524502,MK620897,MK801730,MK878899,MK894434,MN010755,MN010759,MN284892,MN329679,MN369745,MN428062,MN428064,MN585990,MN586008,MN586010,MT310864,MT316458,MT316459,MT316462,MT498038,MT498046,MT498047,MT498051,MT498065,MT498067,MT521990,MT639642,MT639647,MT657332,MT776807,MT952850,MW055907,MW055909,MW291020,MW321655,MW507127,MW924642,MZ005676,MZ005678,MZ028628,MZ209304,MZ2274307,MZ322006,MZ322008,MZ322014,MZ322027,MZ622180,MZ648031,OK040781,OK040783,OK310504,ON081334,ON108642,ON108648,ON260812,ON260814,ON392161,ON456350,ON645341,ON645345,ON755182,ON755188,ON970573,ON970589,ON970613,OP580518 |
| VC_1408_0 | MN703407,MN703414                                                                                                                                                                                                                                                                                                                                                                                                                                                                                                                                                                                                                                                                                                     |
| VC_1408_1 | MH183162,MT639646                                                                                                                                                                                                                                                                                                                                                                                                                                                                                                                                                                                                                                                                                                     |
| VC_1409_0 | MW021755,MW021763,MW021766,OL539438,OL539439,OL539442,OL539455,OL539456,OL539464,OM135608                                                                                                                                                                                                                                                                                                                                                                                                                                                                                                                                                                                                                             |
| VC_141_0  | OP341624,OP341626,OP341627,OP341628,OP341630                                                                                                                                                                                                                                                                                                                                                                                                                                                                                                                                                                                                                                                                          |
| VC_1411_0 | MH153799,MK737944,MZ456037,MZ622170,ON260825                                                                                                                                                                                                                                                                                                                                                                                                                                                                                                                                                                                                                                                                          |
| VC_1412_0 | MH271303,MK937591,MK937606,MK937608,MN813682,MN813684,OK040792                                                                                                                                                                                                                                                                                                                                                                                                                                                                                                                                                                                                                                                        |
| VC_1413_0 | MT889371,ON970592                                                                                                                                                                                                                                                                                                                                                                                                                                                                                                                                                                                                                                                                                                     |
| VC_1414_0 | MH155870,MK240575                                                                                                                                                                                                                                                                                                                                                                                                                                                                                                                                                                                                                                                                                                     |
| VC_1415_0 | MH155873,MH271304,MH271312,MH271321,MH590600,MK524510,MK875798,MK977698,MN062719,MN175603,MN444877,MN585980,MN585986,MN586007,MN586042,MN586059,MT657336,MT818415,MW578837,MW601217,MZ150792,MZ322026,MZ622179,MZ648035,ON081330,ON260815,ON260820,ON970563,ON970612,OP068338,OP297543                                                                                                                                                                                                                                                                                                                                                                                                                                |
| VC_1416_0 | MH229862,MH229863,MH229864,MH229865,MH536815,MH825706,MN224564,MN224565,ON456338,ON456348                                                                                                                                                                                                                                                                                                                                                                                                                                                                                                                                                                                                                             |
| VC_1417_0 | MH447526,MK064562,MK064563                                                                                                                                                                                                                                                                                                                                                                                                                                                                                                                                                                                                                                                                                            |
| VC_1418_0 | MH572274,MH572275,MH572276                                                                                                                                                                                                                                                                                                                                                                                                                                                                                                                                                                                                                                                                                            |
| VC_1419_0 | MH572353,MH572354,MH572355,MH572357,MH572358,MH572407,MH572408,MH572516                                                                                                                                                                                                                                                                                                                                                                                                                                                                                                                                                                                                                                               |
| VC_142_0  | KC595514,KC595515,KC595517,KC595518,KT151956,KT151958                                                                                                                                                                                                                                                                                                                                                                                                                                                                                                                                                                                                                                                                 |
| VC_1420_0 | MH572490,MH572491,MH572517,MH572518,MH572519,MH572520                                                                                                                                                                                                                                                                                                                                                                                                                                                                                                                                                                                                                                                                 |
| VC_1422_0 | MH707430,MW354669,MW354676,MW354677,MW354678                                                                                                                                                                                                                                                                                                                                                                                                                                                                                                                                                                                                                                                                          |
| VC_1423_0 | MH730557,MZ230992,MZ230993,MZ230994,MZ230995,MZ230996,MZ230997,MZ230998,MZ230999,MZ231000,MZ231001                                                                                                                                                                                                                                                                                                                                                                                                                                                                                                                                                                                                                    |
| VC_1424_0 | MK308638,MK757449,MK878904,MK894435,MK894438,MN310546,MN369747,MT310869,MT310875,MT310887,MT310888,MT310889,MT310890,MT310891,MT498064,MT657334,MT657337,MT684587,MT771344,MW055914,MW291018,MW365947,MW365948,MW507124,MW862991,MZ388554,OM913587,ON081328,ON456346,ON970584,OP297538                                                                                                                                                                                                                                                                                                                                                                                                                                |
| VC_1425_0 | MH825698,MN062711,MT024863,ON260817,ON526980,OP068335                                                                                                                                                                                                                                                                                                                                                                                                                                                                                                                                                                                                                                                                 |
| VC_1426_0 | MK411746,MN586027                                                                                                                                                                                                                                                                                                                                                                                                                                                                                                                                                                                                                                                                                                     |
| VC_1427_0 | MH834607,MH834622,MK757448,MT024867,MT024870,MT889364                                                                                                                                                                                                                                                                                                                                                                                                                                                                                                                                                                                                                                                                 |
| VC_1428_0 | MH939157,MK071653                                                                                                                                                                                                                                                                                                                                                                                                                                                                                                                                                                                                                                                                                                     |



|           |                                                                                                                                                                                                                                                                                                                                                                                                                                                                                                                                                                                                                                                                                                                                                                                                                                                                                                                                                                                                                                                                                                                                                                                                                                                                                                                                                                                                                                                                                                                                                                                                                                                                                                                                                                                                                                                                                                                                                                                                                                                                                                                                                                                                                                                                                                                                                                                                                                                                                                                                                                                                                                                                                                                                                                                                                                                                                                                                                                                                                                                                                                                                                                                                                                                                    |
|-----------|--------------------------------------------------------------------------------------------------------------------------------------------------------------------------------------------------------------------------------------------------------------------------------------------------------------------------------------------------------------------------------------------------------------------------------------------------------------------------------------------------------------------------------------------------------------------------------------------------------------------------------------------------------------------------------------------------------------------------------------------------------------------------------------------------------------------------------------------------------------------------------------------------------------------------------------------------------------------------------------------------------------------------------------------------------------------------------------------------------------------------------------------------------------------------------------------------------------------------------------------------------------------------------------------------------------------------------------------------------------------------------------------------------------------------------------------------------------------------------------------------------------------------------------------------------------------------------------------------------------------------------------------------------------------------------------------------------------------------------------------------------------------------------------------------------------------------------------------------------------------------------------------------------------------------------------------------------------------------------------------------------------------------------------------------------------------------------------------------------------------------------------------------------------------------------------------------------------------------------------------------------------------------------------------------------------------------------------------------------------------------------------------------------------------------------------------------------------------------------------------------------------------------------------------------------------------------------------------------------------------------------------------------------------------------------------------------------------------------------------------------------------------------------------------------------------------------------------------------------------------------------------------------------------------------------------------------------------------------------------------------------------------------------------------------------------------------------------------------------------------------------------------------------------------------------------------------------------------------------------------------------------------|
| VC_1429_0 | MH992154,MK249216,MK249217                                                                                                                                                                                                                                                                                                                                                                                                                                                                                                                                                                                                                                                                                                                                                                                                                                                                                                                                                                                                                                                                                                                                                                                                                                                                                                                                                                                                                                                                                                                                                                                                                                                                                                                                                                                                                                                                                                                                                                                                                                                                                                                                                                                                                                                                                                                                                                                                                                                                                                                                                                                                                                                                                                                                                                                                                                                                                                                                                                                                                                                                                                                                                                                                                                         |
| VC_1430_0 | MH992155,MH992196,MH992205                                                                                                                                                                                                                                                                                                                                                                                                                                                                                                                                                                                                                                                                                                                                                                                                                                                                                                                                                                                                                                                                                                                                                                                                                                                                                                                                                                                                                                                                                                                                                                                                                                                                                                                                                                                                                                                                                                                                                                                                                                                                                                                                                                                                                                                                                                                                                                                                                                                                                                                                                                                                                                                                                                                                                                                                                                                                                                                                                                                                                                                                                                                                                                                                                                         |
| VC_1432_0 | MH992167,MK496682                                                                                                                                                                                                                                                                                                                                                                                                                                                                                                                                                                                                                                                                                                                                                                                                                                                                                                                                                                                                                                                                                                                                                                                                                                                                                                                                                                                                                                                                                                                                                                                                                                                                                                                                                                                                                                                                                                                                                                                                                                                                                                                                                                                                                                                                                                                                                                                                                                                                                                                                                                                                                                                                                                                                                                                                                                                                                                                                                                                                                                                                                                                                                                                                                                                  |
| VC_1433_0 | MH992171,MW202680                                                                                                                                                                                                                                                                                                                                                                                                                                                                                                                                                                                                                                                                                                                                                                                                                                                                                                                                                                                                                                                                                                                                                                                                                                                                                                                                                                                                                                                                                                                                                                                                                                                                                                                                                                                                                                                                                                                                                                                                                                                                                                                                                                                                                                                                                                                                                                                                                                                                                                                                                                                                                                                                                                                                                                                                                                                                                                                                                                                                                                                                                                                                                                                                                                                  |
| VC_1436_0 | MK305890,MK620900,OP434453                                                                                                                                                                                                                                                                                                                                                                                                                                                                                                                                                                                                                                                                                                                                                                                                                                                                                                                                                                                                                                                                                                                                                                                                                                                                                                                                                                                                                                                                                                                                                                                                                                                                                                                                                                                                                                                                                                                                                                                                                                                                                                                                                                                                                                                                                                                                                                                                                                                                                                                                                                                                                                                                                                                                                                                                                                                                                                                                                                                                                                                                                                                                                                                                                                         |
| VC_1437_0 | MK496679,MK496680,MK496776,OM869578,OM869711                                                                                                                                                                                                                                                                                                                                                                                                                                                                                                                                                                                                                                                                                                                                                                                                                                                                                                                                                                                                                                                                                                                                                                                                                                                                                                                                                                                                                                                                                                                                                                                                                                                                                                                                                                                                                                                                                                                                                                                                                                                                                                                                                                                                                                                                                                                                                                                                                                                                                                                                                                                                                                                                                                                                                                                                                                                                                                                                                                                                                                                                                                                                                                                                                       |
| VC_1438_0 | MK496698,MK496772                                                                                                                                                                                                                                                                                                                                                                                                                                                                                                                                                                                                                                                                                                                                                                                                                                                                                                                                                                                                                                                                                                                                                                                                                                                                                                                                                                                                                                                                                                                                                                                                                                                                                                                                                                                                                                                                                                                                                                                                                                                                                                                                                                                                                                                                                                                                                                                                                                                                                                                                                                                                                                                                                                                                                                                                                                                                                                                                                                                                                                                                                                                                                                                                                                                  |
| VC_1439_0 | MK496681,MK496760                                                                                                                                                                                                                                                                                                                                                                                                                                                                                                                                                                                                                                                                                                                                                                                                                                                                                                                                                                                                                                                                                                                                                                                                                                                                                                                                                                                                                                                                                                                                                                                                                                                                                                                                                                                                                                                                                                                                                                                                                                                                                                                                                                                                                                                                                                                                                                                                                                                                                                                                                                                                                                                                                                                                                                                                                                                                                                                                                                                                                                                                                                                                                                                                                                                  |
| VC_144_0  | KT626446,ON699007                                                                                                                                                                                                                                                                                                                                                                                                                                                                                                                                                                                                                                                                                                                                                                                                                                                                                                                                                                                                                                                                                                                                                                                                                                                                                                                                                                                                                                                                                                                                                                                                                                                                                                                                                                                                                                                                                                                                                                                                                                                                                                                                                                                                                                                                                                                                                                                                                                                                                                                                                                                                                                                                                                                                                                                                                                                                                                                                                                                                                                                                                                                                                                                                                                                  |
| VC_1440_0 | MK496683,MK496761                                                                                                                                                                                                                                                                                                                                                                                                                                                                                                                                                                                                                                                                                                                                                                                                                                                                                                                                                                                                                                                                                                                                                                                                                                                                                                                                                                                                                                                                                                                                                                                                                                                                                                                                                                                                                                                                                                                                                                                                                                                                                                                                                                                                                                                                                                                                                                                                                                                                                                                                                                                                                                                                                                                                                                                                                                                                                                                                                                                                                                                                                                                                                                                                                                                  |
| VC_1441_0 | MK496686,MK496764                                                                                                                                                                                                                                                                                                                                                                                                                                                                                                                                                                                                                                                                                                                                                                                                                                                                                                                                                                                                                                                                                                                                                                                                                                                                                                                                                                                                                                                                                                                                                                                                                                                                                                                                                                                                                                                                                                                                                                                                                                                                                                                                                                                                                                                                                                                                                                                                                                                                                                                                                                                                                                                                                                                                                                                                                                                                                                                                                                                                                                                                                                                                                                                                                                                  |
| VC_1442_0 | MK496688,MK496690,MK496766                                                                                                                                                                                                                                                                                                                                                                                                                                                                                                                                                                                                                                                                                                                                                                                                                                                                                                                                                                                                                                                                                                                                                                                                                                                                                                                                                                                                                                                                                                                                                                                                                                                                                                                                                                                                                                                                                                                                                                                                                                                                                                                                                                                                                                                                                                                                                                                                                                                                                                                                                                                                                                                                                                                                                                                                                                                                                                                                                                                                                                                                                                                                                                                                                                         |
| VC_1443_0 | MK496689,MK496700,MK496784                                                                                                                                                                                                                                                                                                                                                                                                                                                                                                                                                                                                                                                                                                                                                                                                                                                                                                                                                                                                                                                                                                                                                                                                                                                                                                                                                                                                                                                                                                                                                                                                                                                                                                                                                                                                                                                                                                                                                                                                                                                                                                                                                                                                                                                                                                                                                                                                                                                                                                                                                                                                                                                                                                                                                                                                                                                                                                                                                                                                                                                                                                                                                                                                                                         |
| VC_1444_0 | MK496697,MK496780                                                                                                                                                                                                                                                                                                                                                                                                                                                                                                                                                                                                                                                                                                                                                                                                                                                                                                                                                                                                                                                                                                                                                                                                                                                                                                                                                                                                                                                                                                                                                                                                                                                                                                                                                                                                                                                                                                                                                                                                                                                                                                                                                                                                                                                                                                                                                                                                                                                                                                                                                                                                                                                                                                                                                                                                                                                                                                                                                                                                                                                                                                                                                                                                                                                  |
| VC_1445_0 | MK496699,MK496785                                                                                                                                                                                                                                                                                                                                                                                                                                                                                                                                                                                                                                                                                                                                                                                                                                                                                                                                                                                                                                                                                                                                                                                                                                                                                                                                                                                                                                                                                                                                                                                                                                                                                                                                                                                                                                                                                                                                                                                                                                                                                                                                                                                                                                                                                                                                                                                                                                                                                                                                                                                                                                                                                                                                                                                                                                                                                                                                                                                                                                                                                                                                                                                                                                                  |
| VC_1446_0 | MK496701,MK496702                                                                                                                                                                                                                                                                                                                                                                                                                                                                                                                                                                                                                                                                                                                                                                                                                                                                                                                                                                                                                                                                                                                                                                                                                                                                                                                                                                                                                                                                                                                                                                                                                                                                                                                                                                                                                                                                                                                                                                                                                                                                                                                                                                                                                                                                                                                                                                                                                                                                                                                                                                                                                                                                                                                                                                                                                                                                                                                                                                                                                                                                                                                                                                                                                                                  |
| VC_1447_0 | MK496710,MK496767,MK496768                                                                                                                                                                                                                                                                                                                                                                                                                                                                                                                                                                                                                                                                                                                                                                                                                                                                                                                                                                                                                                                                                                                                                                                                                                                                                                                                                                                                                                                                                                                                                                                                                                                                                                                                                                                                                                                                                                                                                                                                                                                                                                                                                                                                                                                                                                                                                                                                                                                                                                                                                                                                                                                                                                                                                                                                                                                                                                                                                                                                                                                                                                                                                                                                                                         |
| VC_1448_0 | MK496712,MK496787                                                                                                                                                                                                                                                                                                                                                                                                                                                                                                                                                                                                                                                                                                                                                                                                                                                                                                                                                                                                                                                                                                                                                                                                                                                                                                                                                                                                                                                                                                                                                                                                                                                                                                                                                                                                                                                                                                                                                                                                                                                                                                                                                                                                                                                                                                                                                                                                                                                                                                                                                                                                                                                                                                                                                                                                                                                                                                                                                                                                                                                                                                                                                                                                                                                  |
| VC_1449_0 | MK496716,MK496790                                                                                                                                                                                                                                                                                                                                                                                                                                                                                                                                                                                                                                                                                                                                                                                                                                                                                                                                                                                                                                                                                                                                                                                                                                                                                                                                                                                                                                                                                                                                                                                                                                                                                                                                                                                                                                                                                                                                                                                                                                                                                                                                                                                                                                                                                                                                                                                                                                                                                                                                                                                                                                                                                                                                                                                                                                                                                                                                                                                                                                                                                                                                                                                                                                                  |
| VC_1450_0 | MK496717,MK496804                                                                                                                                                                                                                                                                                                                                                                                                                                                                                                                                                                                                                                                                                                                                                                                                                                                                                                                                                                                                                                                                                                                                                                                                                                                                                                                                                                                                                                                                                                                                                                                                                                                                                                                                                                                                                                                                                                                                                                                                                                                                                                                                                                                                                                                                                                                                                                                                                                                                                                                                                                                                                                                                                                                                                                                                                                                                                                                                                                                                                                                                                                                                                                                                                                                  |
| VC_1451_0 | MK496720,MK496796                                                                                                                                                                                                                                                                                                                                                                                                                                                                                                                                                                                                                                                                                                                                                                                                                                                                                                                                                                                                                                                                                                                                                                                                                                                                                                                                                                                                                                                                                                                                                                                                                                                                                                                                                                                                                                                                                                                                                                                                                                                                                                                                                                                                                                                                                                                                                                                                                                                                                                                                                                                                                                                                                                                                                                                                                                                                                                                                                                                                                                                                                                                                                                                                                                                  |
| VC_1452_0 | MK496721,MK496781,MK496786                                                                                                                                                                                                                                                                                                                                                                                                                                                                                                                                                                                                                                                                                                                                                                                                                                                                                                                                                                                                                                                                                                                                                                                                                                                                                                                                                                                                                                                                                                                                                                                                                                                                                                                                                                                                                                                                                                                                                                                                                                                                                                                                                                                                                                                                                                                                                                                                                                                                                                                                                                                                                                                                                                                                                                                                                                                                                                                                                                                                                                                                                                                                                                                                                                         |
| VC_1453_0 | MK496725,MK496746,MK496811                                                                                                                                                                                                                                                                                                                                                                                                                                                                                                                                                                                                                                                                                                                                                                                                                                                                                                                                                                                                                                                                                                                                                                                                                                                                                                                                                                                                                                                                                                                                                                                                                                                                                                                                                                                                                                                                                                                                                                                                                                                                                                                                                                                                                                                                                                                                                                                                                                                                                                                                                                                                                                                                                                                                                                                                                                                                                                                                                                                                                                                                                                                                                                                                                                         |
| VC_1454_0 | MK496748,MK496815                                                                                                                                                                                                                                                                                                                                                                                                                                                                                                                                                                                                                                                                                                                                                                                                                                                                                                                                                                                                                                                                                                                                                                                                                                                                                                                                                                                                                                                                                                                                                                                                                                                                                                                                                                                                                                                                                                                                                                                                                                                                                                                                                                                                                                                                                                                                                                                                                                                                                                                                                                                                                                                                                                                                                                                                                                                                                                                                                                                                                                                                                                                                                                                                                                                  |
| VC_1455_0 | MK496750,MK496816,OM869659                                                                                                                                                                                                                                                                                                                                                                                                                                                                                                                                                                                                                                                                                                                                                                                                                                                                                                                                                                                                                                                                                                                                                                                                                                                                                                                                                                                                                                                                                                                                                                                                                                                                                                                                                                                                                                                                                                                                                                                                                                                                                                                                                                                                                                                                                                                                                                                                                                                                                                                                                                                                                                                                                                                                                                                                                                                                                                                                                                                                                                                                                                                                                                                                                                         |
| VC_1456_0 | MK496753,MK496818                                                                                                                                                                                                                                                                                                                                                                                                                                                                                                                                                                                                                                                                                                                                                                                                                                                                                                                                                                                                                                                                                                                                                                                                                                                                                                                                                                                                                                                                                                                                                                                                                                                                                                                                                                                                                                                                                                                                                                                                                                                                                                                                                                                                                                                                                                                                                                                                                                                                                                                                                                                                                                                                                                                                                                                                                                                                                                                                                                                                                                                                                                                                                                                                                                                  |
| VC_1457_0 | MK496756,MK496824                                                                                                                                                                                                                                                                                                                                                                                                                                                                                                                                                                                                                                                                                                                                                                                                                                                                                                                                                                                                                                                                                                                                                                                                                                                                                                                                                                                                                                                                                                                                                                                                                                                                                                                                                                                                                                                                                                                                                                                                                                                                                                                                                                                                                                                                                                                                                                                                                                                                                                                                                                                                                                                                                                                                                                                                                                                                                                                                                                                                                                                                                                                                                                                                                                                  |
| VC_1458_0 | MK496758,MK496808                                                                                                                                                                                                                                                                                                                                                                                                                                                                                                                                                                                                                                                                                                                                                                                                                                                                                                                                                                                                                                                                                                                                                                                                                                                                                                                                                                                                                                                                                                                                                                                                                                                                                                                                                                                                                                                                                                                                                                                                                                                                                                                                                                                                                                                                                                                                                                                                                                                                                                                                                                                                                                                                                                                                                                                                                                                                                                                                                                                                                                                                                                                                                                                                                                                  |
| VC_1459_0 | MK496770,MK496771                                                                                                                                                                                                                                                                                                                                                                                                                                                                                                                                                                                                                                                                                                                                                                                                                                                                                                                                                                                                                                                                                                                                                                                                                                                                                                                                                                                                                                                                                                                                                                                                                                                                                                                                                                                                                                                                                                                                                                                                                                                                                                                                                                                                                                                                                                                                                                                                                                                                                                                                                                                                                                                                                                                                                                                                                                                                                                                                                                                                                                                                                                                                                                                                                                                  |
| VC_146_0  | KM983329                                                                                                                                                                                                                                                                                                                                                                                                                                                                                                                                                                                                                                                                                                                                                                                                                                                                                                                                                                                                                                                                                                                                                                                                                                                                                                                                                                                                                                                                                                                                                                                                                                                                                                                                                                                                                                                                                                                                                                                                                                                                                                                                                                                                                                                                                                                                                                                                                                                                                                                                                                                                                                                                                                                                                                                                                                                                                                                                                                                                                                                                                                                                                                                                                                                           |
| VC_1460_0 | MK496820,OM869632                                                                                                                                                                                                                                                                                                                                                                                                                                                                                                                                                                                                                                                                                                                                                                                                                                                                                                                                                                                                                                                                                                                                                                                                                                                                                                                                                                                                                                                                                                                                                                                                                                                                                                                                                                                                                                                                                                                                                                                                                                                                                                                                                                                                                                                                                                                                                                                                                                                                                                                                                                                                                                                                                                                                                                                                                                                                                                                                                                                                                                                                                                                                                                                                                                                  |
| VC_1461_0 | MK570053,MK570054,MK570055                                                                                                                                                                                                                                                                                                                                                                                                                                                                                                                                                                                                                                                                                                                                                                                                                                                                                                                                                                                                                                                                                                                                                                                                                                                                                                                                                                                                                                                                                                                                                                                                                                                                                                                                                                                                                                                                                                                                                                                                                                                                                                                                                                                                                                                                                                                                                                                                                                                                                                                                                                                                                                                                                                                                                                                                                                                                                                                                                                                                                                                                                                                                                                                                                                         |
| VC_1462_0 | MK719701,MK719702,MK719703,MK719704,MK719705,MK719706,MK719707,MK719708,MK719709,MK719710,MK719711,MK719712,MK719713,MK719714,MK719715,MK719716,MK719717,MK719718,MK719719,MK719720,MK719721,MK719722,MK719723,MK719724,MK719725,MK719726,MK719727,MK719728,MK719729,MK719730,MK719731,MK719732,MK719733,MK719734,MK719735,MK719736,MK719737,MK719738,MK719739,MK719741,MK719742,MK719743,MK719744,MK719745,MK719746,MK719747,MK719748,MK719749,MK719750,MK719751,MK719752,MK719753,MK719754,MK719755,MK719756,MK719757,MK719758,MK719759,MK719760,MK719761,MK719762,MK719763,MK719764,MK719765,MK719766,MK719767,MK719768,MK719769,MK719770,MK719771,MK719772,MK719773,MK719774,MK719775,MK719776,MK719777,MK719778,MK719779,MK719780,MK719781,MK719782,MK719783,MK719784,MK719785,MK719786,MK719787,MK719788,MK719789,MK719790,MK719791,MK719792,MK719793,MK719794,MK719795,MK719796,MK719797,MK719798,MK719799,MK719800,MK719801,MK719802,MK719803,MK719804,MK719805,MK719806,MK719807,MK719808,MK719809,MK719810,MK719811,MK719812,MK719813,MK719814,MK719815,MK719816,MK719817,MK719818,MK719819,MK719820,MK719821,MK719822,MK719823,MK719824,MK719825,MK719826,MK719827,MK719828,MK719829,MK719830,MK719831,MK719832,MK719833,MK719834,MK719835,MK719836,MK719837,MK719838,MK719839,MK719840,MK719841,MK719842,MK719843,MK719844,MK719845,MK719846,MK719847,MK719848,MK719849,MK719850,MK719851,MK719852,MK719853,MK719854,MK719855,MK719856,MK719857,MK719858,MK719859,MK719860,MK719861,MK719862,MK719863,MK719864,MK719865,MK719866,MK719867,MK719868,MK719869,MK719870,MK719871,MK719872,MK719873,MK719874,MK719875,MK719876,MK719877,MK719878,MK719879,MK719880,MK719881,MK719882,MK719883,MK719884,MK719885,MK719886,MK719887,MK719888,MK719889,MK719890,MK719891,MK719892,MK719893,MK719894,MK719895,MK719896,MK719897,MK719898,MK719899,MK719900,MK719901,MK719902,MK719903,MK719904,MK719905,MK719906,MK719907,MK719908,MK719909,MK719910,MK719911,MK719912,MK719913,MK719914,MK719915,MK719916,MK719917,MK719918,MK719919,MK719920,MK719921,MK719922,MK719923,MK719924,MK719925,MK719926,MK719927,MK719928,MK719929,MK719930,MK719931,MK719932,MK719933,MK719934,MK719935,MK719936,MK719937,MK719938,MK719939,MK719940,MK719941,MK719942,MK719943,MK719944,MK719945,MK719946,MK719947,MK719948,MK719949,MK719950,MK719951,MK719952,MK719953,MK719954,MK719955,MK719956,MK719957,MK719958,MK719959,MK719960,MK719961,MK719962,MK719963,MK719964,MK719965,MK719966,MK719967,MK719968,MK719969,MK719970,MK719971,MK719972,MK719973,MK719974,MK719975,MK719976,MK719977,MK719978,MK719979,MK719980,MK719981,MK719982,MK719983,MK719984,MK719985,MK719986,MK719987,MK719988,MK719989,MK719990,MK719991,MK719992,MK719993,MK719994,MK719995,MK719996,MK719997,MK719998,MK719999,MK720000,MK720001,MK720002,MK720003,MK720004,MK720005,MK720006,MK720007,MK720008,MK720009,MK720010,MK720011,MK720012,MK720013,MK720014,MK720015,MK720016,MK720017,MK720018,MK720019,MK720020,MK720021,MK720022,MK720023,MK720024,MK720025,MK720026,MK720027,MK720028,MK720029,MK720030,MK720031,MK720032,MK720033,MK720034,MK720035,MK720036,MK720037,MK720038,MK720039,MK720040,MK720041,MK720042,MK720043,MK720044,MK720045,MK720046,MK720047,MK720048,MK720049,MK7200 |



|           |                                                                                                                                                                                                                                                                                                                                                                                                                                                                                                                                                                                                                   |
|-----------|-------------------------------------------------------------------------------------------------------------------------------------------------------------------------------------------------------------------------------------------------------------------------------------------------------------------------------------------------------------------------------------------------------------------------------------------------------------------------------------------------------------------------------------------------------------------------------------------------------------------|
| VC_1512_0 | MT975991,OP433453                                                                                                                                                                                                                                                                                                                                                                                                                                                                                                                                                                                                 |
| VC_1513_0 | MW202613,MW202748                                                                                                                                                                                                                                                                                                                                                                                                                                                                                                                                                                                                 |
| VC_1514_0 | MW202637,MW202789                                                                                                                                                                                                                                                                                                                                                                                                                                                                                                                                                                                                 |
| VC_1515_0 | MW202486,MW202591,MW202766                                                                                                                                                                                                                                                                                                                                                                                                                                                                                                                                                                                        |
| VC_1516_0 | MW202572,MW202631,MW202645,MW202742                                                                                                                                                                                                                                                                                                                                                                                                                                                                                                                                                                               |
| VC_1517_0 | MW202524,MW202718,MW202743                                                                                                                                                                                                                                                                                                                                                                                                                                                                                                                                                                                        |
| VC_1518_0 | MW202601,MW202604                                                                                                                                                                                                                                                                                                                                                                                                                                                                                                                                                                                                 |
| VC_1519_0 | MW202608,MW202725,MW202812,MW202826,MW202842                                                                                                                                                                                                                                                                                                                                                                                                                                                                                                                                                                      |
| VC_1520_0 | MW202622,MW202658                                                                                                                                                                                                                                                                                                                                                                                                                                                                                                                                                                                                 |
| VC_1521_0 | MW202642,MW202843,MW202852                                                                                                                                                                                                                                                                                                                                                                                                                                                                                                                                                                                        |
| VC_1522_0 | MW202657,MW202864                                                                                                                                                                                                                                                                                                                                                                                                                                                                                                                                                                                                 |
| VC_1523_0 | MW202753,MW202825                                                                                                                                                                                                                                                                                                                                                                                                                                                                                                                                                                                                 |
| VC_1524_0 | MW353166,MW353167,MW353168,MW353169,MW353170,MW353171,MW353172                                                                                                                                                                                                                                                                                                                                                                                                                                                                                                                                                    |
| VC_1530_0 | MZ089747,MZ089748                                                                                                                                                                                                                                                                                                                                                                                                                                                                                                                                                                                                 |
| VC_1531_0 | MZ089769,OM869588                                                                                                                                                                                                                                                                                                                                                                                                                                                                                                                                                                                                 |
| VC_1532_0 | MZ089783,OM869706                                                                                                                                                                                                                                                                                                                                                                                                                                                                                                                                                                                                 |
| VC_1533_0 | MZ089787,MZ089788,OM869708                                                                                                                                                                                                                                                                                                                                                                                                                                                                                                                                                                                        |
| VC_1534_0 | MZ089790,MZ089792,MZ089794                                                                                                                                                                                                                                                                                                                                                                                                                                                                                                                                                                                        |
| VC_1535_0 | MZ089811,OM869593,OM869669,OM869712                                                                                                                                                                                                                                                                                                                                                                                                                                                                                                                                                                               |
| VC_1536_0 | MZ364235,MZ364236,MZ364238,MZ364239,MZ364257,MZ364289                                                                                                                                                                                                                                                                                                                                                                                                                                                                                                                                                             |
| VC_1537_0 | MZ364251,MZ364282,MZ364294                                                                                                                                                                                                                                                                                                                                                                                                                                                                                                                                                                                        |
| VC_1538_0 | MZ447863,MZ570427                                                                                                                                                                                                                                                                                                                                                                                                                                                                                                                                                                                                 |
| VC_1539_0 | MZ474488,MZ474489                                                                                                                                                                                                                                                                                                                                                                                                                                                                                                                                                                                                 |
| VC_1540_0 | OL689226,OL689227,OL689230                                                                                                                                                                                                                                                                                                                                                                                                                                                                                                                                                                                        |
| VC_1542_0 | OM869572,OM869573                                                                                                                                                                                                                                                                                                                                                                                                                                                                                                                                                                                                 |
| VC_1543_0 | OM869583,OM869672,OM869688                                                                                                                                                                                                                                                                                                                                                                                                                                                                                                                                                                                        |
| VC_1544_0 | OM869594,OM869713                                                                                                                                                                                                                                                                                                                                                                                                                                                                                                                                                                                                 |
| VC_1545_0 | ON014753,ON014757                                                                                                                                                                                                                                                                                                                                                                                                                                                                                                                                                                                                 |
| VC_1546_0 | ON464759,ON464763,ON464764                                                                                                                                                                                                                                                                                                                                                                                                                                                                                                                                                                                        |
| VC_1547_0 | ONS29865,ONS29866                                                                                                                                                                                                                                                                                                                                                                                                                                                                                                                                                                                                 |
| VC_1548_0 | OP549878,OP549879                                                                                                                                                                                                                                                                                                                                                                                                                                                                                                                                                                                                 |
| VC_155_0  | MT080592,MT080597,MT080598,MT080599,MT080603                                                                                                                                                                                                                                                                                                                                                                                                                                                                                                                                                                      |
| VC_155_1  | OM850391,OM850392,ON113344                                                                                                                                                                                                                                                                                                                                                                                                                                                                                                                                                                                        |
| VC_155_10 | KY794641                                                                                                                                                                                                                                                                                                                                                                                                                                                                                                                                                                                                          |
| VC_155_11 | MT080582,MT080583,MT080586,MT080594                                                                                                                                                                                                                                                                                                                                                                                                                                                                                                                                                                               |
| VC_155_12 | MH107769,MN045228                                                                                                                                                                                                                                                                                                                                                                                                                                                                                                                                                                                                 |
| VC_155_13 | AB853330,JX878671,LR215719                                                                                                                                                                                                                                                                                                                                                                                                                                                                                                                                                                                        |
| VC_155_14 | AB903967                                                                                                                                                                                                                                                                                                                                                                                                                                                                                                                                                                                                          |
| VC_155_15 | JQ686190,KM216423,KY779849,LC574321,LR215718,MF001365,MG557618,MH159197,MK250904,MN304941,MT786458,MW546073,MZ427930,MZ573923,OP235318,OP323059                                                                                                                                                                                                                                                                                                                                                                                                                                                                   |
| VC_155_16 | KJ888149                                                                                                                                                                                                                                                                                                                                                                                                                                                                                                                                                                                                          |
| VC_155_17 | MT080585,MT080589,MT080591,MT080601                                                                                                                                                                                                                                                                                                                                                                                                                                                                                                                                                                               |
| VC_155_18 | MT554104                                                                                                                                                                                                                                                                                                                                                                                                                                                                                                                                                                                                          |
| VC_155_19 | OP263968                                                                                                                                                                                                                                                                                                                                                                                                                                                                                                                                                                                                          |
| VC_155_2  | LR215720                                                                                                                                                                                                                                                                                                                                                                                                                                                                                                                                                                                                          |
| VC_155_20 | KP027446                                                                                                                                                                                                                                                                                                                                                                                                                                                                                                                                                                                                          |
| VC_155_21 | MG721208                                                                                                                                                                                                                                                                                                                                                                                                                                                                                                                                                                                                          |
| VC_155_22 | MT080593,MT080596                                                                                                                                                                                                                                                                                                                                                                                                                                                                                                                                                                                                 |
| VC_155_23 | AB853331                                                                                                                                                                                                                                                                                                                                                                                                                                                                                                                                                                                                          |
| VC_155_24 | MZ417322                                                                                                                                                                                                                                                                                                                                                                                                                                                                                                                                                                                                          |
| VC_155_25 | MZ417315,MZ417319,MZ417320,MZ417321,MZ417327,MZ417328,MZ417332,MZ417337,MZ417340,MZ417345,MZ417346,MZ417347,MZ417350,MZ417354                                                                                                                                                                                                                                                                                                                                                                                                                                                                                     |
| VC_155_26 | MZ417331                                                                                                                                                                                                                                                                                                                                                                                                                                                                                                                                                                                                          |
| VC_155_27 | KX011028                                                                                                                                                                                                                                                                                                                                                                                                                                                                                                                                                                                                          |
| VC_155_28 | MN935200                                                                                                                                                                                                                                                                                                                                                                                                                                                                                                                                                                                                          |
| VC_155_29 | KY794642,KY794643,LR215721                                                                                                                                                                                                                                                                                                                                                                                                                                                                                                                                                                                        |
| VC_155_3  | MT787017                                                                                                                                                                                                                                                                                                                                                                                                                                                                                                                                                                                                          |
| VC_155_4  | OL741057                                                                                                                                                                                                                                                                                                                                                                                                                                                                                                                                                                                                          |
| VC_155_5  | MN091625                                                                                                                                                                                                                                                                                                                                                                                                                                                                                                                                                                                                          |
| VC_155_6  | OP297178                                                                                                                                                                                                                                                                                                                                                                                                                                                                                                                                                                                                          |
| VC_155_7  | LC648442                                                                                                                                                                                                                                                                                                                                                                                                                                                                                                                                                                                                          |
| VC_155_8  | AY176327,AY954969,EU418428,FR852584,HQ163896,JX080300,JX080301,JX080302,JX080303,JX080304,JX080305,JX875065,KC012913,KF766114,KJ206559,KJ206560,KJ206561,KJ206562,KJ206563,KP687431,KP687432,KR902361,KR908644,KY581279,MF398190,MF405094,MG656408,MH136584,MH844528,MH844529,MK331930,MK331931,MK417514,MK417515,MK417516,MK584893,MK656892,MN047438,MN336261,MN336262,MN336263,MN539736,MN539737,MN539738,MT080600,MT080602,MT226657,MT338525,MW460250,MW528836,MW546064,MW546065,MW546066,MW546067,MW546068,MW546069,MW546070,MW546072,MW546074,OL362280,OL960567,OL960568,OL960569,OL960570,OM030343,OM373557 |
| VC_155_9  | AP018375,MT411892,OP263967                                                                                                                                                                                                                                                                                                                                                                                                                                                                                                                                                                                        |
| VC_1551_0 | PF3COMN,PF3COMNY                                                                                                                                                                                                                                                                                                                                                                                                                                                                                                                                                                                                  |
| VC_156_0  | KFR021268,KP027447,MH321490,MH321491,MH542234,MT596501,MT596502,MT596503,MT596504,MT596505,MT596506,MZ417323,MZ417325                                                                                                                                                                                                                                                                                                                                                                                                                                                                                             |
| VC_157_0  | KX171212,KX171213,MW430345,MZ417329,MZ417330,MZ417344                                                                                                                                                                                                                                                                                                                                                                                                                                                                                                                                                             |
| VC_159_0  | AP019522,JX194239,JX846612,JX846613,KP881332,KX532239,KY779848,LC492751,LC492752,MT080584,MT080587,MT080588,MT080590,MT080595,MW363798,MW546071,MW546075,MW546076,MW546077,MZ643272,ON814134,ON814135,ON814136,ON866946,OP263969                                                                                                                                                                                                                                                                                                                                                                                  |
| VC_159_1  | LC576631                                                                                                                                                                                                                                                                                                                                                                                                                                                                                                                                                                                                          |
| VC_16_0   | AB012573,AB012574,AB572858,AF452449,AF453500,AY242528,CP017905,CP017906,D89074,FJ904927,MN536023,MN690600                                                                                                                                                                                                                                                                                                                                                                                                                                                                                                         |
| VC_160_0  | AB854109,KY117485,MN844877,OL634959                                                                                                                                                                                                                                                                                                                                                                                                                                                                                                                                                                               |
| VC_161_0  | FN594518,MT104468,MT104469,MT104470,MT104471,MT104472,MT104476,MT104477,MT354570,MW627366,MZ868714,MZ868715,MZ868716,MZ868717                                                                                                                                                                                                                                                                                                                                                                                                                                                                                     |
| VC_162_0  | FR751545,KM247287,MK629528,MN850568,MN850570,MN850583,MN850592,MN850608,MN850617,MN850624,MN850625,MW250275                                                                                                                                                                                                                                                                                                                                                                                                                                                                                                       |



|           |                                                                                                                                                                                                                                                                                                                                                                                                                                                                                              |
|-----------|----------------------------------------------------------------------------------------------------------------------------------------------------------------------------------------------------------------------------------------------------------------------------------------------------------------------------------------------------------------------------------------------------------------------------------------------------------------------------------------------|
| VC_163_0  | MK962628,MK962638,MK962640                                                                                                                                                                                                                                                                                                                                                                                                                                                                   |
| VC_165_0  | OM913597,OM913598                                                                                                                                                                                                                                                                                                                                                                                                                                                                            |
| VC_166_0  | MF150911,MN996301                                                                                                                                                                                                                                                                                                                                                                                                                                                                            |
| VC_167_0  | AB863625,MT740737,MT740741                                                                                                                                                                                                                                                                                                                                                                                                                                                                   |
| VC_168_0  | AY349011,F9937737,JN662425,JX104231,MH638294,MT361768,MT740727,MT740730,MT740731,MT740732,MT740733,MT740736,MT740738,MT740739,MT740740,MT740742,OM283127,OV121131                                                                                                                                                                                                                                                                                                                            |
| VC_169_0  | MW202475,MW202867                                                                                                                                                                                                                                                                                                                                                                                                                                                                            |
| VC_17_0   | AB043678,AB043679,MN719123,MT188662,MT188663,MT188664,MT188665,MT188666,MT193890                                                                                                                                                                                                                                                                                                                                                                                                             |
| VC_170_0  | MK268344,MK773491,MT001829                                                                                                                                                                                                                                                                                                                                                                                                                                                                   |
| VC_170_1  | MT446416                                                                                                                                                                                                                                                                                                                                                                                                                                                                                     |
| VC_170_10 | AB897757,JQ513383,MT708547,OP617745,OU509535                                                                                                                                                                                                                                                                                                                                                                                                                                                 |
| VC_170_11 | KC295538,KM507819,LC494302,LT603033,MH383160,MH791411,MK327931,MK817115,MW822008,ON568341                                                                                                                                                                                                                                                                                                                                                                                                    |
| VC_170_2  | MH494197                                                                                                                                                                                                                                                                                                                                                                                                                                                                                     |
| VC_170_3  | ON286972                                                                                                                                                                                                                                                                                                                                                                                                                                                                                     |
| VC_170_4  | JN882285                                                                                                                                                                                                                                                                                                                                                                                                                                                                                     |
| VC_170_5  | KU574722                                                                                                                                                                                                                                                                                                                                                                                                                                                                                     |
| VC_170_6  | OP292654                                                                                                                                                                                                                                                                                                                                                                                                                                                                                     |
| VC_170_7  | KY630187,MT939486,MT939487,MT939488,MW879342,MW879343,MW879344                                                                                                                                                                                                                                                                                                                                                                                                                               |
| VC_170_8  | LR596615,LT960551,LT960552                                                                                                                                                                                                                                                                                                                                                                                                                                                                   |
| VC_170_9  | MG592671                                                                                                                                                                                                                                                                                                                                                                                                                                                                                     |
| VC_171_0  | LC727697,LC727698,LR588166,MK797984                                                                                                                                                                                                                                                                                                                                                                                                                                                          |
| VC_172_0  | AM749441,DQ163916,JX131330,KC758116,KT734862,KX198613,KX961385,KY000218,KY000219,KY000220,KY000221,MF490239,MH791403,MH791406,MN871456,MN871463,MN871469,MN871478,MN871482,MN871486,MT118302,MZ089734,MZ089741,OL763419,OM809160,ON165687                                                                                                                                                                                                                                                    |
| VC_173_0  | AB910392,MK443266,MK803322                                                                                                                                                                                                                                                                                                                                                                                                                                                                   |
| VC_175_0  | JQ067089,JQ067093,KU204984,KX241618,LR743532,MG018224,MT664984,OK275492,OK275493,OL674541,ON005621,ON189045,ON189047,ON331942,ON529854,ON932079,ON932080,ON932084,OP361299,OP380269                                                                                                                                                                                                                                                                                                          |
| VC_176_0  | KT001913                                                                                                                                                                                                                                                                                                                                                                                                                                                                                     |
| VC_176_1  | KY006853                                                                                                                                                                                                                                                                                                                                                                                                                                                                                     |
| VC_177_0  | KP202969,KP202970,MH746817,MK962627,MK962633,MK962634,MT241605,MT241607                                                                                                                                                                                                                                                                                                                                                                                                                      |
| VC_178_0  | KP626665,KP626668,LR743524,MZ326855,ON189048                                                                                                                                                                                                                                                                                                                                                                                                                                                 |
| VC_179_0  | KT887558,MG707188                                                                                                                                                                                                                                                                                                                                                                                                                                                                            |
| VC_18_0   | AB016282,HM072038,OM236514,ON528935                                                                                                                                                                                                                                                                                                                                                                                                                                                          |
| VC_180_0  | AB910393,LC102729,OK094707                                                                                                                                                                                                                                                                                                                                                                                                                                                                   |
| VC_181_0  | MG592578,MG592660,MW865292,OX241572                                                                                                                                                                                                                                                                                                                                                                                                                                                          |
| VC_182_0  | AF165214,HQ711985                                                                                                                                                                                                                                                                                                                                                                                                                                                                            |
| VC_182_1  | KT887557,ON857940                                                                                                                                                                                                                                                                                                                                                                                                                                                                            |
| VC_182_2  | OM141125                                                                                                                                                                                                                                                                                                                                                                                                                                                                                     |
| VC_182_3  | KT968831                                                                                                                                                                                                                                                                                                                                                                                                                                                                                     |
| VC_183_0  | AB910602,HG315669,KX181651,KY853667,MN335248                                                                                                                                                                                                                                                                                                                                                                                                                                                 |
| VC_184_0  | MH206183,MH206184,MH218848,MK512531,MN263053                                                                                                                                                                                                                                                                                                                                                                                                                                                 |
| VC_185_0  | AY394005,DQ631426,DQ873690,EU272036,EU272037,HE584812,HM624080,JN808773,JN811560,JQ067085,JQ762257,JX434030,JX434031,JX434032,JX434033,KF475786,KJ477077,KM233689,KT968832,KU199707,KU199708,KU199709,LN610590,LN907801,LT608331,LT999987,MH643777,MH643778,MK144667,MK511017,MK511018,MK511019,MK511020,MK511021,MK511022,MK511023,MK511024,MK511025,MK511026,MK511027,MK511028,MK511029,MK511030,MK511031,MK511032,MK511033,MK511034,MK511035,MK511036,MK511037,MK511038,MW390886,OM541307 |
| VC_186_0  | AB916497,ON170148,ON170170,ON170354                                                                                                                                                                                                                                                                                                                                                                                                                                                          |
| VC_188_0  | JF974307,JF974308,KT381864,KT381865,KX077179                                                                                                                                                                                                                                                                                                                                                                                                                                                 |
| VC_189_0  | KF302035,MZ568827                                                                                                                                                                                                                                                                                                                                                                                                                                                                            |
| VC_19_0   | KM983328,KM983331,KM983334                                                                                                                                                                                                                                                                                                                                                                                                                                                                   |
| VC_190_0  | MF975721,OK490409                                                                                                                                                                                                                                                                                                                                                                                                                                                                            |
| VC_191_0  | MH727593,MZ547449                                                                                                                                                                                                                                                                                                                                                                                                                                                                            |
| VC_192_0  | AF232233,JX495041,JX495042,JX495043,LN898172,MH719189,MH719190,MH719191,MH719192,MH719193,MH719194,MH719195,MK511057,MK511058,MK511059,MK511060,MK511061,MK511063,MK511064,MK511065,MK934841,MN536027                                                                                                                                                                                                                                                                                        |
| VC_193_0  | LR797314,MF959999,MK088078                                                                                                                                                                                                                                                                                                                                                                                                                                                                   |
| VC_195_0  | KX961630,MN150686,OK499977,OK499983                                                                                                                                                                                                                                                                                                                                                                                                                                                          |
| VC_195_1  | JN797797,JN797798,KT187252,KT224359,KX987999,MH487649,MN013089                                                                                                                                                                                                                                                                                                                                                                                                                               |
| VC_195_2  | KJ081346,KJ676859                                                                                                                                                                                                                                                                                                                                                                                                                                                                            |
| VC_195_3  | JX094431,KJ451625,KT995480,KU577463,KX495186,MG602477,MH638309,MH638312,OL964058                                                                                                                                                                                                                                                                                                                                                                                                             |
| VC_195_4  | MN364664                                                                                                                                                                                                                                                                                                                                                                                                                                                                                     |
| VC_196_0  | AB971354,AF059242,AF059243,EF068134,FJ483840,FJ483841,FJ483842,FJ483843,FJ483844,FJ539132,FJ539133,FJ539134,FJ539135                                                                                                                                                                                                                                                                                                                                                                         |
| VC_197_0  | AJ604530,AJ604531                                                                                                                                                                                                                                                                                                                                                                                                                                                                            |
| VC_198_0  | KP143763,KX130863                                                                                                                                                                                                                                                                                                                                                                                                                                                                            |
| VC_198_1  | MK373792                                                                                                                                                                                                                                                                                                                                                                                                                                                                                     |
| VC_198_10 | KR422353                                                                                                                                                                                                                                                                                                                                                                                                                                                                                     |
| VC_198_11 | AC171169                                                                                                                                                                                                                                                                                                                                                                                                                                                                                     |
| VC_198_12 | LR027384                                                                                                                                                                                                                                                                                                                                                                                                                                                                                     |
| VC_198_13 | MH370377,MH370378,MN970211,MN994502                                                                                                                                                                                                                                                                                                                                                                                                                                                          |
| VC_198_14 | LR597655,MN022787,MN316588                                                                                                                                                                                                                                                                                                                                                                                                                                                                   |
| VC_198_15 | KJ190157,KY677846,MN994496                                                                                                                                                                                                                                                                                                                                                                                                                                                                   |
| VC_198_16 | OK272480                                                                                                                                                                                                                                                                                                                                                                                                                                                                                     |
| VC_198_17 | AP019559                                                                                                                                                                                                                                                                                                                                                                                                                                                                                     |
| VC_198_18 | MF402939                                                                                                                                                                                                                                                                                                                                                                                                                                                                                     |
| VC_198_19 | MZ501075                                                                                                                                                                                                                                                                                                                                                                                                                                                                                     |
| VC_198_2  | MK373797,MK373799                                                                                                                                                                                                                                                                                                                                                                                                                                                                            |
| VC_198_20 | LN887948,MK972715,MK972716,MT843274                                                                                                                                                                                                                                                                                                                                                                                                                                                          |
| VC_198_21 | KY114934                                                                                                                                                                                                                                                                                                                                                                                                                                                                                     |
| VC_198_22 | KM979354,KM979355,MH203051                                                                                                                                                                                                                                                                                                                                                                                                                                                                   |
| VC_198_23 | HQ406778,KY963424,MH102285,MN026741,MT311645,MW149273,MW149275,OK108607,OK254197,OP394141                                                                                                                                                                                                                                                                                                                                                                                                    |
| VC_198_24 | HQ665011,LR597659,MZ398246,OK143207,ON185585                                                                                                                                                                                                                                                                                                                                                                                                                                                 |



|           |                                                                                                                                                                                                                                                    |
|-----------|----------------------------------------------------------------------------------------------------------------------------------------------------------------------------------------------------------------------------------------------------|
| VC_198_25 | MN956514                                                                                                                                                                                                                                           |
| VC_198_26 | MG387042                                                                                                                                                                                                                                           |
| VC_198_27 | KR233164                                                                                                                                                                                                                                           |
| VC_198_28 | OK665835,ON185581,ON185582,ON185583,ON185584                                                                                                                                                                                                       |
| VC_198_29 | MT080103                                                                                                                                                                                                                                           |
| VC_198_3  | MN994504                                                                                                                                                                                                                                           |
| VC_198_30 | MF774688                                                                                                                                                                                                                                           |
| VC_198_31 | MG065692                                                                                                                                                                                                                                           |
| VC_198_32 | MZ5011058                                                                                                                                                                                                                                          |
| VC_198_33 | MZ5011103                                                                                                                                                                                                                                          |
| VC_198_34 | MN445182                                                                                                                                                                                                                                           |
| VC_198_35 | OK272477                                                                                                                                                                                                                                           |
| VC_198_36 | MT653143                                                                                                                                                                                                                                           |
| VC_198_37 | MT653146                                                                                                                                                                                                                                           |
| VC_198_38 | AY543070,AY587007,AY692264                                                                                                                                                                                                                         |
| VC_198_39 | MT233524                                                                                                                                                                                                                                           |
| VC_198_4  | MT577844                                                                                                                                                                                                                                           |
| VC_198_40 | MG969412,MW006479                                                                                                                                                                                                                                  |
| VC_198_5  | OM386657                                                                                                                                                                                                                                           |
| VC_198_6  | MZ501074                                                                                                                                                                                                                                           |
| VC_198_7  | MF431730,MF431731,MF431732,MF431733,MF431734,MF431735,MT074448                                                                                                                                                                                     |
| VC_198_8  | OM386660                                                                                                                                                                                                                                           |
| VC_198_9  | MK373796                                                                                                                                                                                                                                           |
| VC_199_0  | MW006478,MW006481                                                                                                                                                                                                                                  |
| VC_199_1  | MK370036                                                                                                                                                                                                                                           |
| VC_199_10 | MN197465                                                                                                                                                                                                                                           |
| VC_199_11 | MF681663                                                                                                                                                                                                                                           |
| VC_199_12 | MT074464                                                                                                                                                                                                                                           |
| VC_199_13 | MK907267,MK907268,MK907269,MK907270,MK907271                                                                                                                                                                                                       |
| VC_199_14 | LR027389                                                                                                                                                                                                                                           |
| VC_199_15 | OL451946,OL502173                                                                                                                                                                                                                                  |
| VC_199_16 | KY787212,MF001363,MH370369,MK393882,MK947458,MK972717,MN218190,MN218191,MN379739,MN994501,MT074450,MT074458                                                                                                                                        |
| VC_199_17 | CP000917,MK947459,MZ501105,OL770310                                                                                                                                                                                                                |
| VC_199_18 | MT833283,MZ501072                                                                                                                                                                                                                                  |
| VC_199_19 | KM236244,KU927497,KX017521,LC659915,MG065642,MH631454,MK728824,MK728825,MN187969,MW357609,OK288022,OP045498                                                                                                                                        |
| VC_199_2  | MZ501109                                                                                                                                                                                                                                           |
| VC_199_20 | MK005300                                                                                                                                                                                                                                           |
| VC_199_21 | MZ501076                                                                                                                                                                                                                                           |
| VC_199_22 | MW567727                                                                                                                                                                                                                                           |
| VC_199_23 | MH370379                                                                                                                                                                                                                                           |
| VC_199_24 | MZ570151                                                                                                                                                                                                                                           |
| VC_199_25 | MW206381                                                                                                                                                                                                                                           |
| VC_199_26 | HE956708                                                                                                                                                                                                                                           |
| VC_199_27 | MK867835                                                                                                                                                                                                                                           |
| VC_199_28 | MZ501108                                                                                                                                                                                                                                           |
| VC_199_29 | MH370375                                                                                                                                                                                                                                           |
| VC_199_3  | MK972704,MK972707,MK972709,MT074453,MT074457                                                                                                                                                                                                       |
| VC_199_30 | MT074447,MT074461                                                                                                                                                                                                                                  |
| VC_199_31 | MK770410,MK972708                                                                                                                                                                                                                                  |
| VC_199_32 | MF431736,MF431737,MF431738,MF431739,MF431740,MF431741,MK050846,MK809530,MT074449,MT074465,MT653145,ONS26840                                                                                                                                        |
| VC_199_33 | MW423798                                                                                                                                                                                                                                           |
| VC_199_4  | MH370366,MT074455                                                                                                                                                                                                                                  |
| VC_199_5  | MH370386,MT004791,MT074452,MT074456,MT074460,MT074463                                                                                                                                                                                              |
| VC_199_6  | MT074468                                                                                                                                                                                                                                           |
| VC_199_7  | MT074467                                                                                                                                                                                                                                           |
| VC_199_8  | MH370376,MT074454                                                                                                                                                                                                                                  |
| VC_199_9  | MH370367,MH370380,MT074459,MT074466,MW411578                                                                                                                                                                                                       |
| VC_2_0    | AB008550,MK034952,MK511066,Y13918                                                                                                                                                                                                                  |
| VC_20_0   | KT372714,KT852578,KX190835,KXS34340,MN065183                                                                                                                                                                                                       |
| VC_200_0  | KX845404,MG459987,MK521907,MK630230,MN101228,MN163280,MN434094,MN434096,MT380195,MW713578,MZ571828,MZ571830,MZ634344,ON637170,OP171943                                                                                                             |
| VC_200_1  | MZ079855                                                                                                                                                                                                                                           |
| VC_200_2  | MN478377                                                                                                                                                                                                                                           |
| VC_201_0  | KY363465,MW057857                                                                                                                                                                                                                                  |
| VC_203_0  | MG676224,MG676225                                                                                                                                                                                                                                  |
| VC_203_1  | MK318083                                                                                                                                                                                                                                           |
| VC_204_0  | MN095770,ON287373                                                                                                                                                                                                                                  |
| VC_205_0  | AE002163,CMU41758,MG641183,MN862345,MW202581                                                                                                                                                                                                       |
| VC_206_0  | AJ270057,AJ550635,AY769964,MG883723,MG945324,MG945546,MG945571,MG945669,MH572277,MH572280,MH572282,MH572290,MH572330,MH572334,MH572422,MH572438,MH572444,MH572448,MH572452,MH572454,MH992157,MH992174,MH992182,MH992210,MN862343,MW202732,MW202889 |
| VC_207_0  | OL617035                                                                                                                                                                                                                                           |
| VC_208_0  | KC131021,MH572341,MH572342,MH572343,MH572399,MH572400,MH572401,MH572402,MH572403,MH572453,MH572513,MH572514                                                                                                                                        |
| VC_209_0  | MH992181                                                                                                                                                                                                                                           |
| VC_209_0  | MH572434,MH572475,MZ286294                                                                                                                                                                                                                         |



|          |                                                                                                                                                                                                                                                                                                                                                                                                                                                                                                                                                                                                                                                                                                                                                                                                                                                                                                                                                                                                                                                                                                        |
|----------|--------------------------------------------------------------------------------------------------------------------------------------------------------------------------------------------------------------------------------------------------------------------------------------------------------------------------------------------------------------------------------------------------------------------------------------------------------------------------------------------------------------------------------------------------------------------------------------------------------------------------------------------------------------------------------------------------------------------------------------------------------------------------------------------------------------------------------------------------------------------------------------------------------------------------------------------------------------------------------------------------------------------------------------------------------------------------------------------------------|
| VC_218_0 | KY888143,KY926698,KY926699,MZ368140                                                                                                                                                                                                                                                                                                                                                                                                                                                                                                                                                                                                                                                                                                                                                                                                                                                                                                                                                                                                                                                                    |
| VC_22_0  | JF974314,KJ746502,MF614627,MF614628                                                                                                                                                                                                                                                                                                                                                                                                                                                                                                                                                                                                                                                                                                                                                                                                                                                                                                                                                                                                                                                                    |
| VC_220_0 | KT429160,MT880872                                                                                                                                                                                                                                                                                                                                                                                                                                                                                                                                                                                                                                                                                                                                                                                                                                                                                                                                                                                                                                                                                      |
| VC_222_0 | DQ398043,KF017927,KF416344,MC099947,MN585989                                                                                                                                                                                                                                                                                                                                                                                                                                                                                                                                                                                                                                                                                                                                                                                                                                                                                                                                                                                                                                                           |
| VC_222_1 | AF022214,AP018476,AP018480,KC787102,KC787105,KC787106,KX574455,KX758538,KX897981,LC730318,MH513985,MK494087,MN234169,MT310876,MT310883,MT310884,MT310885,MW924646,OP297553                                                                                                                                                                                                                                                                                                                                                                                                                                                                                                                                                                                                                                                                                                                                                                                                                                                                                                                             |
| VC_222_2 | JF946695,KT381276,MF919536,MH020237,ZI8946                                                                                                                                                                                                                                                                                                                                                                                                                                                                                                                                                                                                                                                                                                                                                                                                                                                                                                                                                                                                                                                             |
| VC_223_0 | MF185727,MF324899,MK801735,MN369748                                                                                                                                                                                                                                                                                                                                                                                                                                                                                                                                                                                                                                                                                                                                                                                                                                                                                                                                                                                                                                                                    |
| VC_223_1 | MK814748                                                                                                                                                                                                                                                                                                                                                                                                                                                                                                                                                                                                                                                                                                                                                                                                                                                                                                                                                                                                                                                                                               |
| VC_223_2 | MN585968,MN586002                                                                                                                                                                                                                                                                                                                                                                                                                                                                                                                                                                                                                                                                                                                                                                                                                                                                                                                                                                                                                                                                                      |
| VC_223_3 | GU339467,JN408461,KF024721,KU761558,KU761559,KX641263,MF140403,MH825709                                                                                                                                                                                                                                                                                                                                                                                                                                                                                                                                                                                                                                                                                                                                                                                                                                                                                                                                                                                                                                |
| VC_223_4 | KJ959632,KM197169,KM677210,KU297783,KX683875,MF668269,MF919538,MH825701,MK061408,MK284522,MK967395,MZ322019,OM203159                                                                                                                                                                                                                                                                                                                                                                                                                                                                                                                                                                                                                                                                                                                                                                                                                                                                                                                                                                                   |
| VC_223_5 | MW601216,MZ209305                                                                                                                                                                                                                                                                                                                                                                                                                                                                                                                                                                                                                                                                                                                                                                                                                                                                                                                                                                                                                                                                                      |
| VC_223_6 | AP018479,JN408460,JX899358,KF981601,KJ410132,KJ410134,KM463009,KM591906,KT588442,KU985093,KU985095,KX576639,KX619650,KY965065,LC730320,MF472896,MF919490,MF919500,MF919531,MH051252,MH077576,MH338234,MH697591,MH825704,MK524491,MK919472,MN234203,MN585981,MN585983,MN585998,MT310877,MT310886,MT498041,MT498060,MT498066,MT658804,MW924643,MZ355728,MZ622171,MZ622182,MZ820090,OP297537                                                                                                                                                                                                                                                                                                                                                                                                                                                                                                                                                                                                                                                                                                              |
| VC_223_7 | MT310858                                                                                                                                                                                                                                                                                                                                                                                                                                                                                                                                                                                                                                                                                                                                                                                                                                                                                                                                                                                                                                                                                               |
| VC_224_0 | EU744250,KU568494,KX758539,MK279857,MN703408                                                                                                                                                                                                                                                                                                                                                                                                                                                                                                                                                                                                                                                                                                                                                                                                                                                                                                                                                                                                                                                           |
| VC_224_1 | MN062708                                                                                                                                                                                                                                                                                                                                                                                                                                                                                                                                                                                                                                                                                                                                                                                                                                                                                                                                                                                                                                                                                               |
| VC_225_0 | KF861510,MN096376,MT639645                                                                                                                                                                                                                                                                                                                                                                                                                                                                                                                                                                                                                                                                                                                                                                                                                                                                                                                                                                                                                                                                             |
| VC_226_0 | JF957060,KC661275,KP273225,MC793454,MT555337                                                                                                                                                                                                                                                                                                                                                                                                                                                                                                                                                                                                                                                                                                                                                                                                                                                                                                                                                                                                                                                           |
| VC_227_0 | KR080193,MN310541,MT522004,OM203161                                                                                                                                                                                                                                                                                                                                                                                                                                                                                                                                                                                                                                                                                                                                                                                                                                                                                                                                                                                                                                                                    |
| VC_228_0 | KJ695581,KY471460,MF140410,MH338236,MH338237,MH536828,MK494130,MK524507,MK524511,MK524513,MK524514,MK524519,MN310547,MN586006,MN703405,MN892487,MW055904,MZ747517,MZ747521,ON108640,OP297532,OP297549                                                                                                                                                                                                                                                                                                                                                                                                                                                                                                                                                                                                                                                                                                                                                                                                                                                                                                  |
| VC_229_0 | KX657793,MH513984,MK494113,MK524530,OM203158                                                                                                                                                                                                                                                                                                                                                                                                                                                                                                                                                                                                                                                                                                                                                                                                                                                                                                                                                                                                                                                           |
| VC_23_0  | AB036666,HQ906662,HQ906663,HQ906664,KX522565,MK976036,MN180248,MN180249,MN180250,MN180251,MN180252                                                                                                                                                                                                                                                                                                                                                                                                                                                                                                                                                                                                                                                                                                                                                                                                                                                                                                                                                                                                     |
| VC_230_0 | JF704097,JF937092,JF937094,JN049605,JN698999,JN699019,KF560332,KF560333,KF560334,KM401838,KU695582,KU985096,KX375815,KX576638,KX641261,MF668288,MC099945,MC099952,MH020240,MH051253,MH155876,MH779517,MK359352,MK359360,MK494090,MK894433,MN586039,MN728683,MT024861,MT657338,MW822143,MZ005685,MZ171376,MZ322007,MZ456034,MZ681516,OM913585,OP434447                                                                                                                                                                                                                                                                                                                                                                                                                                                                                                                                                                                                                                                                                                                                                  |
| VC_231_0 | KU998249,KU998250,KU998251,KX557280,KX557283,KX557284,MF668282,MH001454,MH316566,MH513974,MK967382,MN284898,MN369756,MT522007,MZ028625,MZ622176,MZ681508,OM818328,OP021679                                                                                                                                                                                                                                                                                                                                                                                                                                                                                                                                                                                                                                                                                                                                                                                                                                                                                                                             |
| VC_232_0 | JF704110,JN699005,KT285706,KU613353,KU716094,KU716095,KX585252,KX664447,KX685355,MK872835,MG872840,MG872842,MH371122,MK061409,MK468591,MK494108,MK524489,MK559428,MK977713,MN234167,MN234200,MN234209,MN234235,MN310542,MN369741,MN369763,MN369764,MN585974,MN585978,MN585979,MN585994,ON724016                                                                                                                                                                                                                                                                                                                                                                                                                                                                                                                                                                                                                                                                                                                                                                                                        |
| VC_234_0 | AF334111,HM066936                                                                                                                                                                                                                                                                                                                                                                                                                                                                                                                                                                                                                                                                                                                                                                                                                                                                                                                                                                                                                                                                                      |
| VC_235_0 | AF063097,AY135486,AY135739,AY251033,B1U32222,HQ110084,KC139521,KC618326,KF322032,KR073660,KR073661,KT630644,KX833211,LR595869,LR595870,LR595873,LR595883,LR595885,LR595887,MF276773,MK416018,MK907236,MK907237,MK907238,MK907239,MK972710,MK972711,MN016939,MT239398,MT374855,MT374857,MT374858,MZ420230,MZ520833,OK490408,OK490461,OK490464,OK490467,OK490470,OK490473,OM046626,OM046627,OM046628,OM140653,OM475426,OM475429,OM475431,OM475433,OM475434,ON146440,ON239131,ON470601,ON470606,ON470613,ON782130,OU784549,OU784746,OU784750,OV192280                                                                                                                                                                                                                                                                                                                                                                                                                                                                                                                                                     |
| VC_236_0 | CP025874,CP025901,CP025923,CP052639,KP063541,KY271397,LR595891,MG589387,MK416015,OK490394,OK490396,OK490398,OK490400,OK490402,OK490404,OK490406,OK490412,OK490414,OK490422,OK490424,OK490426,OK490428,OK490432,OK490435,OK490437,OK490440,OK490443,OK490446                                                                                                                                                                                                                                                                                                                                                                                                                                                                                                                                                                                                                                                                                                                                                                                                                                            |
| VC_237_0 | OK490449,OK490453,OK490456,OK490459                                                                                                                                                                                                                                                                                                                                                                                                                                                                                                                                                                                                                                                                                                                                                                                                                                                                                                                                                                                                                                                                    |
| VC_237_1 | JQ780327,MK524177,OL964755                                                                                                                                                                                                                                                                                                                                                                                                                                                                                                                                                                                                                                                                                                                                                                                                                                                                                                                                                                                                                                                                             |
| VC_238_0 | HM208537                                                                                                                                                                                                                                                                                                                                                                                                                                                                                                                                                                                                                                                                                                                                                                                                                                                                                                                                                                                                                                                                                               |
| VC_239_0 | MT366580,MZ496293,OP121182                                                                                                                                                                                                                                                                                                                                                                                                                                                                                                                                                                                                                                                                                                                                                                                                                                                                                                                                                                                                                                                                             |
| VC_24_0  | AF065411,AF301375                                                                                                                                                                                                                                                                                                                                                                                                                                                                                                                                                                                                                                                                                                                                                                                                                                                                                                                                                                                                                                                                                      |
| VC_240_0 | AY133112,FN297812,JX556417                                                                                                                                                                                                                                                                                                                                                                                                                                                                                                                                                                                                                                                                                                                                                                                                                                                                                                                                                                                                                                                                             |
| VC_241_0 | MH674343,MN737622                                                                                                                                                                                                                                                                                                                                                                                                                                                                                                                                                                                                                                                                                                                                                                                                                                                                                                                                                                                                                                                                                      |
| VC_243_0 | AP018469,AP018470,AP018471,JN831653,KJ944841,KT361920,KX621007,KY087992,MF140402,MF140435,MH051258,MH926058,MK224497,MK524485,MK524488,MN369761,MN945904,MT310882,MW601218,ON526978,ON645342                                                                                                                                                                                                                                                                                                                                                                                                                                                                                                                                                                                                                                                                                                                                                                                                                                                                                                           |
| VC_244_0 | HM152764,HM152767,JF704105,JF704106,JN185608,N64374,KJ567045,KM677211,KX585253,KX641264,KX657794,KX6657795,KX657796,KY380102,MF140412,MF140428,MF140430,MF377440,MF472892,MF668267,MF919532,MC962364,MC962371,MH001453,MH051246,MH077577,MH371113,MH50944                                                                                                                                                                                                                                                                                                                                                                                                                                                                                                                                                                                                                                                                                                                                                                                                                                              |
| VC_243_1 | MH513977,MH536821,MH536822,MH697578,MH727544,MK016503,MK112537,MK460247,MN234182,MN234197,MN234198,MN234205,MN234230,MN234231,MN369742,MN369746,MN908692,MW112722,MW712723,MW712730,MW712733,MW712734,MW862979,MW862984,MW862985,MW862990,MZ005674,MZ355721,MZ648037,OK040778,OK040782,OK040784,OK310505,OM818330,OM913584,ON081329,ON081331,ON260816,ON456339,ON456353,ON526984,ON687735,ON687736,ON724013                                                                                                                                                                                                                                                                                                                                                                                                                                                                                                                                                                                                                                                                                            |
| VC_244_1 | MF140416,MN234165,MN234174,MN234201,MN234226                                                                                                                                                                                                                                                                                                                                                                                                                                                                                                                                                                                                                                                                                                                                                                                                                                                                                                                                                                                                                                                           |
| VC_244_2 | KF713486,MF185722,MK310138,MK494119                                                                                                                                                                                                                                                                                                                                                                                                                                                                                                                                                                                                                                                                                                                                                                                                                                                                                                                                                                                                                                                                    |
| VC_244_3 | JF937104,JX042579,KP027199,KR080206,KX683428,KY087993,MF140398,MF140406,MF324915,MF373841,MN234199,MT723940,MW601222                                                                                                                                                                                                                                                                                                                                                                                                                                                                                                                                                                                                                                                                                                                                                                                                                                                                                                                                                                                   |
| VC_245_0 | KY945355,MF324908,MF324909,MF324911,MF324912,MF324913,MF324914,MN234176,MN369762,MN945901,ON456351                                                                                                                                                                                                                                                                                                                                                                                                                                                                                                                                                                                                                                                                                                                                                                                                                                                                                                                                                                                                     |
| VC_247_0 | MH910038,MH910039,MH910042,MK376955,MK460246,MN284895,MT310859,MT310860                                                                                                                                                                                                                                                                                                                                                                                                                                                                                                                                                                                                                                                                                                                                                                                                                                                                                                                                                                                                                                |
| VC_248_0 | JN243855,KJ567042,KM363596,KM923971,KX585251,KX636165,MF185717,MF185719,MF185720,MC962374,MH051255,MH576966,MH651171,MH697592,MW435854,MZ322016,MZ958747                                                                                                                                                                                                                                                                                                                                                                                                                                                                                                                                                                                                                                                                                                                                                                                                                                                                                                                                               |
| VC_25_0  | MW314859,MW584165,MW584169,MW584207                                                                                                                                                                                                                                                                                                                                                                                                                                                                                                                                                                                                                                                                                                                                                                                                                                                                                                                                                                                                                                                                    |
| VC_251_0 | MF975720,MT121966                                                                                                                                                                                                                                                                                                                                                                                                                                                                                                                                                                                                                                                                                                                                                                                                                                                                                                                                                                                                                                                                                      |
| VC_252_0 | JX507079,MH142219,MH142220                                                                                                                                                                                                                                                                                                                                                                                                                                                                                                                                                                                                                                                                                                                                                                                                                                                                                                                                                                                                                                                                             |
| VC_253_0 | OK490460,OK490463,OK490466,OK490469,OK490472                                                                                                                                                                                                                                                                                                                                                                                                                                                                                                                                                                                                                                                                                                                                                                                                                                                                                                                                                                                                                                                           |
| VC_254_0 | MF695815,MK416014                                                                                                                                                                                                                                                                                                                                                                                                                                                                                                                                                                                                                                                                                                                                                                                                                                                                                                                                                                                                                                                                                      |
| VC_254_1 | KY271401,MK416017,OK490430,OK490433,OK490438,OK490441,OK490444,OK490447,OK490450,OK490451,OK490454,OK490458                                                                                                                                                                                                                                                                                                                                                                                                                                                                                                                                                                                                                                                                                                                                                                                                                                                                                                                                                                                            |
| VC_255_0 | AY583234,AY583235,AY583236                                                                                                                                                                                                                                                                                                                                                                                                                                                                                                                                                                                                                                                                                                                                                                                                                                                                                                                                                                                                                                                                             |
| VC_256_0 | AF234172,AF234173,AF503408,F0818745,KU760857,MH160767,MH422554,MH445380,MH445381,MK188976,ON018986,ON470615,ON470617,OP279344                                                                                                                                                                                                                                                                                                                                                                                                                                                                                                                                                                                                                                                                                                                                                                                                                                                                                                                                                                          |
| VC_257_0 | MF356679                                                                                                                                                                                                                                                                                                                                                                                                                                                                                                                                                                                                                                                                                                                                                                                                                                                                                                                                                                                                                                                                                               |
| VC_258_0 | HQ316581,MG592412,MG592507,MG592513,MG592524,MG592527,MG592588,MG592589,MG592669,MG592670,MZ568828                                                                                                                                                                                                                                                                                                                                                                                                                                                                                                                                                                                                                                                                                                                                                                                                                                                                                                                                                                                                     |
| VC_26_0  | KY939598,OP380511                                                                                                                                                                                                                                                                                                                                                                                                                                                                                                                                                                                                                                                                                                                                                                                                                                                                                                                                                                                                                                                                                      |
| VC_260_0 | AY539836,CP006222,ON170188                                                                                                                                                                                                                                                                                                                                                                                                                                                                                                                                                                                                                                                                                                                                                                                                                                                                                                                                                                                                                                                                             |
| VC_261_0 | AF085222,AF115102,AF115103,AF145054,FJ236103,KT717083,KT717084,KT717085,KY705251,KY705256,KY705257,KY705259,KY705260,KY705261,KY705262,KY705263,KY705264,KY705265,KY705266,KY705267,KY705270,KY705271,KY705272,KY705273,KY705274,KY705275,KY705276,KY705282,KY705283,KY705284,KY705287,KY705288,KY705289,KY705290,MF6161328,MF580759,MF580760,MF580761,MF580762,MF580763,MF580764,MF580765,MF580766,MF580767,MF580768,MF580769,MF580770,MF580771,MF580772,MF580773,MF580774,MF580775,MG708273,MG708274,MG708275,MH000602,MH000603,MH000604,MH375594,MH375595,MH375596,MH375597,MH375598,MH375599,MH375600,MH892351,MH892352,MH892353,MH892354,MH892356,MH892357,MH892358,MH892359,MH892360,MH892361,MH892377,MH892378,MH892379,MH892380,MH892381,MH892382,MH937458,MH937459,MH937461,MH937462,MH937465,MH937466,MH937467,MH937468,MH937469,MH937470,MH937471,MH937472,MH937474,MH937477,MH937482,MH937483,MH937485,MH937486,MH937487,MH937488,MH937489,MH937490,MH937491,MH937492,MH937493,MH937495,MH937496,MH937497,MH937499,MH937500,MH937501,MH937504,MH937506,MH937508,MH937661,MH973662,MZ090946 |
| VC_262_0 | HN170017,ON170042,ON170051,ON170056,ON170060,ON170066,ON170072,ON170166,ON170169,ON170274,ON170278,ON170357                                                                                                                                                                                                                                                                                                                                                                                                                                                                                                                                                                                                                                                                                                                                                                                                                                                                                                                                                                                            |
| VC_262_1 | AF158600,AY699705,EP529515,FJ226752,HE861935,HG380752,HG424323,KY705258,KY705268,KY705269,KY705277,KY705278,KY705279,KY705280,KY705281,KY705285,KY705286,MH375593,MH892362,MH892363,MH892364,MH892366,MH892376,MH892383,MH892384,MH892385,MH937457,MH937460,MH937463,MH937464,MH937473,MH937475,MH937476,MH937478,MH937479,MH937484,MH937494,MH937498,MH937502,MH937503,MH937507,MH937509,MH937510,MH937511,U88974                                                                                                                                                                                                                                                                                                                                                                                                                                                                                                                                                                                                                                                                                     |
| VC_262_2 | FJ965538,KX879643,KY705252,KY705253,KY705254,KY705255,MH892355,MH892367,MH892373,MH973663,MK202159,MK202160,MK202161                                                                                                                                                                                                                                                                                                                                                                                                                                                                                                                                                                                                                                                                                                                                                                                                                                                                                                                                                                                   |
| VC_262_3 | KU678389,KU678390,KU678391,KU678392,KX879641,KX879642,MH892350,MH892365,MH892368,MH892369,MH892370,MH892371,MH892372,MH892374                                                                                                                                                                                                                                                                                                                                                                                                                                                                                                                                                                                                                                                                                                                                                                                                                                                                                                                                                                          |



|            |                                                                                                                                                                                     |
|------------|-------------------------------------------------------------------------------------------------------------------------------------------------------------------------------------|
| VC_265_0   | MK448824,MK449002,MK449003                                                                                                                                                          |
| VC_266_0   | AF176025,AF323669,AF489521,AJ245616,LT985568,LT985571,LT993224,MN534316,MN534317,MN689509,MN689516,MN689521,MN689530                                                                |
| VC_267_0   | MZ308445                                                                                                                                                                            |
| VC_268_0   | AF242738,KX160204,KX160219,KX160220,KX456207,KX456211,KX456212,MK448706,MK448721,MN534320                                                                                           |
| VC_268_1   | AY007505,FR671408,FR671409,KC348600,KC348601,KC348602,KT337360,KX077894,KY065485,KY065503,KY065504,MK448814,MK448881,MK448882,MK448896,MK448909,MK448988,MK448989,OL774869,OL774877 |
| VC_268_2   | KP208803                                                                                                                                                                            |
| VC_268_3   | MK448900                                                                                                                                                                            |
| VC_269_0   | AF323668,LT985569,LT985574,LT985578,LT985583,LT993229,LT996082                                                                                                                      |
| VC_27_0    | AY714348,JN848801,MN200777,MN200778                                                                                                                                                 |
| VC_271_0   | DQ394807,DQ394808,DQ394809,DQ394810,KX456206,KX456208,KX456209,KX456210,KX456213,LT985575,LT985576,LT996081                                                                         |
| VC_273_0   | GQ452243,KT945994                                                                                                                                                                   |
| VC_274_0   | JX564242,JX567312,KX160206,KX160209,KX160210,KX160211,MN552144                                                                                                                      |
| VC_279_0   | AJ251789,AP018361,AY131267,AY605066,EU246945,KC171646,KC171647,MF999224,MH983004,MN830258,MT956952                                                                                  |
| VC_280_0   | GU323708,HQ141410,MN830252,MN830253                                                                                                                                                 |
| VC_281_0   | AJ421943,MH220877                                                                                                                                                                   |
| VC_283_0   | AF133242,AJ969242                                                                                                                                                                   |
| VC_284_0   | AF155037,MC966533,MK424903                                                                                                                                                          |
| VC_285_0   | AY029185,AY526908,AY526909                                                                                                                                                          |
| VC_286_0   | AY605181,MH128984                                                                                                                                                                   |
| VC_287_0   | GQ421471,MT084350                                                                                                                                                                   |
| VC_288_0   | MK733262,MK733263,MK733264                                                                                                                                                          |
| VC_289_0   | MK942064,MN746332                                                                                                                                                                   |
| VC_29_0    | AB063393,GQ403789                                                                                                                                                                   |
| VC_290_0   | MN508614,MN508618                                                                                                                                                                   |
| VC_290_1   | MZ502379                                                                                                                                                                            |
| VC_290_10  | AP011113                                                                                                                                                                            |
| VC_290_100 | MT515752,MT526905                                                                                                                                                                   |
| VC_290_101 | LR597660                                                                                                                                                                            |
| VC_290_102 | OK570375                                                                                                                                                                            |
| VC_290_103 | ON528735                                                                                                                                                                            |
| VC_290_104 | OL310488                                                                                                                                                                            |
| VC_290_105 | MZ234013                                                                                                                                                                            |
| VC_290_106 | MZ753803                                                                                                                                                                            |
| VC_290_107 | ON528739                                                                                                                                                                            |
| VC_290_108 | OK148441                                                                                                                                                                            |
| VC_290_109 | KY608967,OK275722                                                                                                                                                                   |
| VC_290_11  | ON528741                                                                                                                                                                            |
| VC_290_110 | MN508616,MN508617                                                                                                                                                                   |
| VC_290_111 | KY290975                                                                                                                                                                            |
| VC_290_112 | OL870317                                                                                                                                                                            |
| VC_290_113 | LR215724                                                                                                                                                                            |
| VC_290_114 | KX130861                                                                                                                                                                            |
| VC_290_115 | JN986846                                                                                                                                                                            |
| VC_290_116 | MZ501089                                                                                                                                                                            |
| VC_290_117 | MZ234031,MZ234035,MZ234038                                                                                                                                                          |
| VC_290_118 | MZ501113,OL741432,OL870316                                                                                                                                                          |
| VC_290_119 | MK327939                                                                                                                                                                            |
| VC_290_12  | MK373785                                                                                                                                                                            |
| VC_290_120 | MK962752                                                                                                                                                                            |
| VC_290_121 | MK327940,MK327945                                                                                                                                                                   |
| VC_290_122 | OK274152                                                                                                                                                                            |
| VC_290_123 | OL362041                                                                                                                                                                            |
| VC_290_124 | MK373779                                                                                                                                                                            |
| VC_290_125 | KX130862                                                                                                                                                                            |
| VC_290_126 | OM386666                                                                                                                                                                            |
| VC_290_127 | MK327929                                                                                                                                                                            |
| VC_290_128 | OK076929                                                                                                                                                                            |
| VC_290_129 | MH992510                                                                                                                                                                            |
| VC_290_13  | ON528745                                                                                                                                                                            |
| VC_290_130 | MN022785                                                                                                                                                                            |
| VC_290_131 | MN716856                                                                                                                                                                            |
| VC_290_132 | ON528740                                                                                                                                                                            |
| VC_290_133 | MK327936                                                                                                                                                                            |
| VC_290_134 | MK327944                                                                                                                                                                            |
| VC_290_135 | OP168898                                                                                                                                                                            |
| VC_290_136 | MT515753,MT515755                                                                                                                                                                   |
| VC_290_137 | LR597657                                                                                                                                                                            |
| VC_290_138 | MG867727                                                                                                                                                                            |
| VC_290_139 | KX009778                                                                                                                                                                            |
| VC_290_14  | MF001360                                                                                                                                                                            |
| VC_290_140 | OV876900,OV877085                                                                                                                                                                   |
| VC_290_141 | LR746311                                                                                                                                                                            |



|            |                                     |
|------------|-------------------------------------|
| VC_290_142 | ON528726,ON528744                   |
| VC_290_143 | KX452698                            |
| VC_290_144 | MW341595                            |
| VC_290_145 | KM501444                            |
| VC_290_146 | ON528746                            |
| VC_290_147 | MZ501096                            |
| VC_290_148 | JN202312                            |
| VC_290_149 | ON528736                            |
| VC_290_15  | LC465543                            |
| VC_290_150 | MZ065353                            |
| VC_290_151 | MH051915                            |
| VC_290_152 | OL960580                            |
| VC_290_153 | MW749000                            |
| VC_290_154 | HM035025                            |
| VC_290_155 | MT630408,MZ681930                   |
| VC_290_156 | MK327942                            |
| VC_290_157 | OL960581                            |
| VC_290_158 | MF327007                            |
| VC_290_159 | MH837626                            |
| VC_290_16  | MK327937                            |
| VC_290_160 | ON229909                            |
| VC_290_161 | MT179807                            |
| VC_290_162 | ON720975                            |
| VC_290_163 | KF925357,KR233165                   |
| VC_290_164 | MK886800,MZ502380                   |
| VC_290_165 | OK018184                            |
| VC_290_166 | MZ189262                            |
| VC_290_167 | OM135583                            |
| VC_290_168 | MW822007                            |
| VC_290_169 | MK962750                            |
| VC_290_17  | MK327946                            |
| VC_290_170 | MH051916                            |
| VC_290_171 | MT682709                            |
| VC_290_172 | MW883059                            |
| VC_290_173 | MT968995                            |
| VC_290_174 | MZ417521                            |
| VC_290_175 | MW822011                            |
| VC_290_176 | MZ150757                            |
| VC_290_177 | OL770073                            |
| VC_290_178 | ON645936                            |
| VC_290_179 | MN580668                            |
| VC_290_18  | MK327928                            |
| VC_290_180 | MT515756                            |
| VC_290_181 | MH243439                            |
| VC_290_182 | LC348379                            |
| VC_290_183 | MF001359                            |
| VC_290_184 | MT884006,MT884007                   |
| VC_290_185 | MN994497                            |
| VC_290_186 | ON528742                            |
| VC_290_187 | AP018932                            |
| VC_290_188 | MH992121                            |
| VC_290_189 | MF158046                            |
| VC_290_19  | MF327008                            |
| VC_290_190 | MK977694                            |
| VC_290_2   | HM997020,KP869105                   |
| VC_290_20  | MF327009                            |
| VC_290_21  | MN781580                            |
| VC_290_22  | OP197928                            |
| VC_290_23  | MT828552                            |
| VC_290_24  | MG775043                            |
| VC_290_25  | KU867876                            |
| VC_290_26  | OL615012                            |
| VC_290_27  | MT176424                            |
| VC_290_28  | MT176426                            |
| VC_290_29  | ON528727                            |
| VC_290_3   | FJ839693,KM607004,OK040907          |
| VC_290_30  | ON528728                            |
| VC_290_31  | MN895437                            |
| VC_290_32  | MZ436830                            |
| VC_290_33  | LN881726,LN881729,LN881734,LN881737 |
| VC_290_34  | MH809535,MT515751,MT828551,MT828553 |
| VC_290_35  | MK962755                            |



|           |                                                                                                                      |
|-----------|----------------------------------------------------------------------------------------------------------------------|
| VC_290_36 | MZ501065                                                                                                             |
| VC_290_37 | LN881732                                                                                                             |
| VC_290_38 | LR990704                                                                                                             |
| VC_290_39 | MN895434                                                                                                             |
| VC_290_4  | MZ291552,OP555980,OP555981,OP555982,OP572230                                                                         |
| VC_290_40 | MZ234018                                                                                                             |
| VC_290_41 | MZ501046                                                                                                             |
| VC_290_42 | MZ501050                                                                                                             |
| VC_290_43 | MK373786                                                                                                             |
| VC_290_44 | MN895438                                                                                                             |
| VC_290_45 | MH355584                                                                                                             |
| VC_290_46 | MZ501066                                                                                                             |
| VC_290_47 | MZ501067                                                                                                             |
| VC_290_48 | MN895436                                                                                                             |
| VC_290_49 | MT176425                                                                                                             |
| VC_290_5  | LC620505                                                                                                             |
| VC_290_50 | MZ501106                                                                                                             |
| VC_290_51 | MN895435                                                                                                             |
| VC_290_52 | MH535563                                                                                                             |
| VC_290_53 | MK373781                                                                                                             |
| VC_290_54 | MT682713                                                                                                             |
| VC_290_55 | ON528743                                                                                                             |
| VC_290_56 | MZ2726795                                                                                                            |
| VC_290_57 | KT184311                                                                                                             |
| VC_290_58 | KX130864                                                                                                             |
| VC_290_59 | OK272473                                                                                                             |
| VC_290_6  | ON782582                                                                                                             |
| VC_290_60 | OK272476                                                                                                             |
| VC_290_61 | MT446387                                                                                                             |
| VC_290_62 | OK272484                                                                                                             |
| VC_290_63 | KT184312                                                                                                             |
| VC_290_64 | MF158045                                                                                                             |
| VC_290_65 | OL956808                                                                                                             |
| VC_290_66 | KT184308                                                                                                             |
| VC_290_67 | LR877332,MT515754                                                                                                    |
| VC_290_68 | MW749001                                                                                                             |
| VC_290_69 | HE956711                                                                                                             |
| VC_290_7  | MW286157                                                                                                             |
| VC_290_70 | MZ501098                                                                                                             |
| VC_290_71 | LR215723                                                                                                             |
| VC_290_72 | MT682710                                                                                                             |
| VC_290_73 | LN881728,LN881733,LN881736                                                                                           |
| VC_290_74 | MT682714                                                                                                             |
| VC_290_75 | MZ170040                                                                                                             |
| VC_290_76 | MK373787                                                                                                             |
| VC_290_77 | MT682712,MZ170041                                                                                                    |
| VC_290_78 | MZ234027,MZ234030,MZ234034,MZ234036,MZ234037,MZ234039,MZ234040,MZ234041,MZ234042,MZ234043,MZ234051,MZ234052,MZ234053 |
| VC_290_79 | MF001354                                                                                                             |
| VC_290_8  | KU925172                                                                                                             |
| VC_290_80 | MT764206                                                                                                             |
| VC_290_81 | KR269718                                                                                                             |
| VC_290_82 | KM606994,KM606995,KM606996,KM606997,KM606998,KM606999                                                                |
| VC_290_83 | KM607000                                                                                                             |
| VC_290_84 | FJ839692                                                                                                             |
| VC_290_85 | KX828711                                                                                                             |
| VC_290_86 | ON528734                                                                                                             |
| VC_290_87 | ON528738                                                                                                             |
| VC_290_88 | AP018814,MH550421                                                                                                    |
| VC_290_89 | MG781190,MG781191                                                                                                    |
| VC_290_9  | MZ501052                                                                                                             |
| VC_290_90 | KF208315                                                                                                             |
| VC_290_91 | AF158101,HM137666,KJ477684,KJ477685,KJ477686,KM607002,KM607003,MT984581,MZ375356,OL964735,OL964745                   |
| VC_290_92 | AP018813,LC348380,MH751506,OM339528                                                                                  |
| VC_290_93 | MT932213                                                                                                             |
| VC_290_94 | DQ904452,KM607001                                                                                                    |
| VC_290_95 | JX128259                                                                                                             |
| VC_290_96 | ON506924                                                                                                             |
| VC_290_97 | LR215722                                                                                                             |
| VC_290_98 | ON210139                                                                                                             |
| VC_290_99 | KJ668714                                                                                                             |
| VC_291_0  | KJ025957,MN095771,OM457001                                                                                           |
| VC_293_0  | MW512264,MZ501047                                                                                                    |



|           |                                                                                                                                                                                                                                                                                                                                                                                                                                                                                                                                                                                                                                                                                                                                                                                                                                                                                                                                                                                                                                                                                                                                                                                                                                                                                                                                                                                                                                                                                                                                                                                                                                                                                                                                                                                                                                                                                                                                                                                                                                                                                                                                                                                                                                                                                                                                                                                                                                                                                                                                                                                                                                                                                                                                                                                                                                                                                                                                                                                                                                                                                                                                                                                                                                                                                                                                                                                                                                                                                                                                                                                                                                                                                                                                                                                                                                                                                                                                                                                                                                                                                                                                                                                                                                                                                                                                                                                                                                                                                                                                                                                                                                                                                                                                                                                                                                                                                                                                                                                                                                                                                                                                                                                                                                                                                                                                                                                                                                                                                                                                                                                                                                                                                                                                                                                                                                                                                                                                                                                                                                                                                                                                                                                                                                                                                                                                                                                                                                                                                                                                                                                                                                                                                                                                                                                                                                                                                                                                                                                                                                                                                                                                                                                                                                                                                                                                                                                                                                                                                                                                                                                                                                                                                                                                                                                                                                                                                                                                                                                                                                                                                                                                                                                                                                                                                                                                                                                                                                                                                                                                                                                                                                                                                                                                                                                                                                                                                                                                                                                                                                                                                                                                                                                                                                                                                                                                                                                                                                                                                                                                                                                                                                                                                                                                                                                                                                                                                                                                                                                                                                                                                                                                                                                                                                                                |
|-----------|----------------------------------------------------------------------------------------------------------------------------------------------------------------------------------------------------------------------------------------------------------------------------------------------------------------------------------------------------------------------------------------------------------------------------------------------------------------------------------------------------------------------------------------------------------------------------------------------------------------------------------------------------------------------------------------------------------------------------------------------------------------------------------------------------------------------------------------------------------------------------------------------------------------------------------------------------------------------------------------------------------------------------------------------------------------------------------------------------------------------------------------------------------------------------------------------------------------------------------------------------------------------------------------------------------------------------------------------------------------------------------------------------------------------------------------------------------------------------------------------------------------------------------------------------------------------------------------------------------------------------------------------------------------------------------------------------------------------------------------------------------------------------------------------------------------------------------------------------------------------------------------------------------------------------------------------------------------------------------------------------------------------------------------------------------------------------------------------------------------------------------------------------------------------------------------------------------------------------------------------------------------------------------------------------------------------------------------------------------------------------------------------------------------------------------------------------------------------------------------------------------------------------------------------------------------------------------------------------------------------------------------------------------------------------------------------------------------------------------------------------------------------------------------------------------------------------------------------------------------------------------------------------------------------------------------------------------------------------------------------------------------------------------------------------------------------------------------------------------------------------------------------------------------------------------------------------------------------------------------------------------------------------------------------------------------------------------------------------------------------------------------------------------------------------------------------------------------------------------------------------------------------------------------------------------------------------------------------------------------------------------------------------------------------------------------------------------------------------------------------------------------------------------------------------------------------------------------------------------------------------------------------------------------------------------------------------------------------------------------------------------------------------------------------------------------------------------------------------------------------------------------------------------------------------------------------------------------------------------------------------------------------------------------------------------------------------------------------------------------------------------------------------------------------------------------------------------------------------------------------------------------------------------------------------------------------------------------------------------------------------------------------------------------------------------------------------------------------------------------------------------------------------------------------------------------------------------------------------------------------------------------------------------------------------------------------------------------------------------------------------------------------------------------------------------------------------------------------------------------------------------------------------------------------------------------------------------------------------------------------------------------------------------------------------------------------------------------------------------------------------------------------------------------------------------------------------------------------------------------------------------------------------------------------------------------------------------------------------------------------------------------------------------------------------------------------------------------------------------------------------------------------------------------------------------------------------------------------------------------------------------------------------------------------------------------------------------------------------------------------------------------------------------------------------------------------------------------------------------------------------------------------------------------------------------------------------------------------------------------------------------------------------------------------------------------------------------------------------------------------------------------------------------------------------------------------------------------------------------------------------------------------------------------------------------------------------------------------------------------------------------------------------------------------------------------------------------------------------------------------------------------------------------------------------------------------------------------------------------------------------------------------------------------------------------------------------------------------------------------------------------------------------------------------------------------------------------------------------------------------------------------------------------------------------------------------------------------------------------------------------------------------------------------------------------------------------------------------------------------------------------------------------------------------------------------------------------------------------------------------------------------------------------------------------------------------------------------------------------------------------------------------------------------------------------------------------------------------------------------------------------------------------------------------------------------------------------------------------------------------------------------------------------------------------------------------------------------------------------------------------------------------------------------------------------------------------------------------------------------------------------------------------------------------------------------------------------------------------------------------------------------------------------------------------------------------------------------------------------------------------------------------------------------------------------------------------------------------------------------------------------------------------------------------------------------------------------------------------------------------------------------------------------------------------------------------------------------------------------------------------------------------------------------------------------------------------------------------------------------------------------------------------------------------------------------------------------------------------------------------------------------------------------------------------------------------------------------------------------------------------------------------------------------------------------------------------------------------------------------------------------------------------------------------------------------------------------------------------------------------------------------------------------------------------------------------------------------------------------------------------------------------------------------------------------------------------------------------------------------------------------------------------------------------------------------------------------------------------------------------------------------------------------------------------------------------------------------------------------------------------------------------------------------------------------------------------------------------------------------------------------------------------------------------------------------------------------------------------------------------------------------------------------------------------------------------------------------------------------------------------------------|
| VC_293_1  | KR422352,LR027383,LR027386,LR027387,LR027390,LR027391,MH243438,MK327934,MK327943,MK373778,MK373782,MK373784,MK962754,MK962756,MK962757,MN850579,MN850590,MZ234025,OL960576,OL960577,OM960734                                                                                                                                                                                                                                                                                                                                                                                                                                                                                                                                                                                                                                                                                                                                                                                                                                                                                                                                                                                                                                                                                                                                                                                                                                                                                                                                                                                                                                                                                                                                                                                                                                                                                                                                                                                                                                                                                                                                                                                                                                                                                                                                                                                                                                                                                                                                                                                                                                                                                                                                                                                                                                                                                                                                                                                                                                                                                                                                                                                                                                                                                                                                                                                                                                                                                                                                                                                                                                                                                                                                                                                                                                                                                                                                                                                                                                                                                                                                                                                                                                                                                                                                                                                                                                                                                                                                                                                                                                                                                                                                                                                                                                                                                                                                                                                                                                                                                                                                                                                                                                                                                                                                                                                                                                                                                                                                                                                                                                                                                                                                                                                                                                                                                                                                                                                                                                                                                                                                                                                                                                                                                                                                                                                                                                                                                                                                                                                                                                                                                                                                                                                                                                                                                                                                                                                                                                                                                                                                                                                                                                                                                                                                                                                                                                                                                                                                                                                                                                                                                                                                                                                                                                                                                                                                                                                                                                                                                                                                                                                                                                                                                                                                                                                                                                                                                                                                                                                                                                                                                                                                                                                                                                                                                                                                                                                                                                                                                                                                                                                                                                                                                                                                                                                                                                                                                                                                                                                                                                                                                                                                                                                                                                                                                                                                                                                                                                                                                                                                                                                                                                                                   |
| VC_293_10 | AY303349,KF562341,KM407600,KY703222,MH992122,MT446390,MZ501056,OM982647,ON528737                                                                                                                                                                                                                                                                                                                                                                                                                                                                                                                                                                                                                                                                                                                                                                                                                                                                                                                                                                                                                                                                                                                                                                                                                                                                                                                                                                                                                                                                                                                                                                                                                                                                                                                                                                                                                                                                                                                                                                                                                                                                                                                                                                                                                                                                                                                                                                                                                                                                                                                                                                                                                                                                                                                                                                                                                                                                                                                                                                                                                                                                                                                                                                                                                                                                                                                                                                                                                                                                                                                                                                                                                                                                                                                                                                                                                                                                                                                                                                                                                                                                                                                                                                                                                                                                                                                                                                                                                                                                                                                                                                                                                                                                                                                                                                                                                                                                                                                                                                                                                                                                                                                                                                                                                                                                                                                                                                                                                                                                                                                                                                                                                                                                                                                                                                                                                                                                                                                                                                                                                                                                                                                                                                                                                                                                                                                                                                                                                                                                                                                                                                                                                                                                                                                                                                                                                                                                                                                                                                                                                                                                                                                                                                                                                                                                                                                                                                                                                                                                                                                                                                                                                                                                                                                                                                                                                                                                                                                                                                                                                                                                                                                                                                                                                                                                                                                                                                                                                                                                                                                                                                                                                                                                                                                                                                                                                                                                                                                                                                                                                                                                                                                                                                                                                                                                                                                                                                                                                                                                                                                                                                                                                                                                                                                                                                                                                                                                                                                                                                                                                                                                                                                                                                               |
| VC_293_11 | MH359124,MK524178,MW882907                                                                                                                                                                                                                                                                                                                                                                                                                                                                                                                                                                                                                                                                                                                                                                                                                                                                                                                                                                                                                                                                                                                                                                                                                                                                                                                                                                                                                                                                                                                                                                                                                                                                                                                                                                                                                                                                                                                                                                                                                                                                                                                                                                                                                                                                                                                                                                                                                                                                                                                                                                                                                                                                                                                                                                                                                                                                                                                                                                                                                                                                                                                                                                                                                                                                                                                                                                                                                                                                                                                                                                                                                                                                                                                                                                                                                                                                                                                                                                                                                                                                                                                                                                                                                                                                                                                                                                                                                                                                                                                                                                                                                                                                                                                                                                                                                                                                                                                                                                                                                                                                                                                                                                                                                                                                                                                                                                                                                                                                                                                                                                                                                                                                                                                                                                                                                                                                                                                                                                                                                                                                                                                                                                                                                                                                                                                                                                                                                                                                                                                                                                                                                                                                                                                                                                                                                                                                                                                                                                                                                                                                                                                                                                                                                                                                                                                                                                                                                                                                                                                                                                                                                                                                                                                                                                                                                                                                                                                                                                                                                                                                                                                                                                                                                                                                                                                                                                                                                                                                                                                                                                                                                                                                                                                                                                                                                                                                                                                                                                                                                                                                                                                                                                                                                                                                                                                                                                                                                                                                                                                                                                                                                                                                                                                                                                                                                                                                                                                                                                                                                                                                                                                                                                                                                                     |
| VC_293_12 | MG589383,MZ189261,OL770074                                                                                                                                                                                                                                                                                                                                                                                                                                                                                                                                                                                                                                                                                                                                                                                                                                                                                                                                                                                                                                                                                                                                                                                                                                                                                                                                                                                                                                                                                                                                                                                                                                                                                                                                                                                                                                                                                                                                                                                                                                                                                                                                                                                                                                                                                                                                                                                                                                                                                                                                                                                                                                                                                                                                                                                                                                                                                                                                                                                                                                                                                                                                                                                                                                                                                                                                                                                                                                                                                                                                                                                                                                                                                                                                                                                                                                                                                                                                                                                                                                                                                                                                                                                                                                                                                                                                                                                                                                                                                                                                                                                                                                                                                                                                                                                                                                                                                                                                                                                                                                                                                                                                                                                                                                                                                                                                                                                                                                                                                                                                                                                                                                                                                                                                                                                                                                                                                                                                                                                                                                                                                                                                                                                                                                                                                                                                                                                                                                                                                                                                                                                                                                                                                                                                                                                                                                                                                                                                                                                                                                                                                                                                                                                                                                                                                                                                                                                                                                                                                                                                                                                                                                                                                                                                                                                                                                                                                                                                                                                                                                                                                                                                                                                                                                                                                                                                                                                                                                                                                                                                                                                                                                                                                                                                                                                                                                                                                                                                                                                                                                                                                                                                                                                                                                                                                                                                                                                                                                                                                                                                                                                                                                                                                                                                                                                                                                                                                                                                                                                                                                                                                                                                                                                                                                     |
| VC_293_13 | KF582788,MF044457,MK639187,MT782071,MW630116,MZ311865,MZ560701,MZ868638,OV754623,OV877511                                                                                                                                                                                                                                                                                                                                                                                                                                                                                                                                                                                                                                                                                                                                                                                                                                                                                                                                                                                                                                                                                                                                                                                                                                                                                                                                                                                                                                                                                                                                                                                                                                                                                                                                                                                                                                                                                                                                                                                                                                                                                                                                                                                                                                                                                                                                                                                                                                                                                                                                                                                                                                                                                                                                                                                                                                                                                                                                                                                                                                                                                                                                                                                                                                                                                                                                                                                                                                                                                                                                                                                                                                                                                                                                                                                                                                                                                                                                                                                                                                                                                                                                                                                                                                                                                                                                                                                                                                                                                                                                                                                                                                                                                                                                                                                                                                                                                                                                                                                                                                                                                                                                                                                                                                                                                                                                                                                                                                                                                                                                                                                                                                                                                                                                                                                                                                                                                                                                                                                                                                                                                                                                                                                                                                                                                                                                                                                                                                                                                                                                                                                                                                                                                                                                                                                                                                                                                                                                                                                                                                                                                                                                                                                                                                                                                                                                                                                                                                                                                                                                                                                                                                                                                                                                                                                                                                                                                                                                                                                                                                                                                                                                                                                                                                                                                                                                                                                                                                                                                                                                                                                                                                                                                                                                                                                                                                                                                                                                                                                                                                                                                                                                                                                                                                                                                                                                                                                                                                                                                                                                                                                                                                                                                                                                                                                                                                                                                                                                                                                                                                                                                                                                                                      |
| VC_293_14 | JX536493                                                                                                                                                                                                                                                                                                                                                                                                                                                                                                                                                                                                                                                                                                                                                                                                                                                                                                                                                                                                                                                                                                                                                                                                                                                                                                                                                                                                                                                                                                                                                                                                                                                                                                                                                                                                                                                                                                                                                                                                                                                                                                                                                                                                                                                                                                                                                                                                                                                                                                                                                                                                                                                                                                                                                                                                                                                                                                                                                                                                                                                                                                                                                                                                                                                                                                                                                                                                                                                                                                                                                                                                                                                                                                                                                                                                                                                                                                                                                                                                                                                                                                                                                                                                                                                                                                                                                                                                                                                                                                                                                                                                                                                                                                                                                                                                                                                                                                                                                                                                                                                                                                                                                                                                                                                                                                                                                                                                                                                                                                                                                                                                                                                                                                                                                                                                                                                                                                                                                                                                                                                                                                                                                                                                                                                                                                                                                                                                                                                                                                                                                                                                                                                                                                                                                                                                                                                                                                                                                                                                                                                                                                                                                                                                                                                                                                                                                                                                                                                                                                                                                                                                                                                                                                                                                                                                                                                                                                                                                                                                                                                                                                                                                                                                                                                                                                                                                                                                                                                                                                                                                                                                                                                                                                                                                                                                                                                                                                                                                                                                                                                                                                                                                                                                                                                                                                                                                                                                                                                                                                                                                                                                                                                                                                                                                                                                                                                                                                                                                                                                                                                                                                                                                                                                                                                       |
| VC_293_15 | MK047717,ON528725                                                                                                                                                                                                                                                                                                                                                                                                                                                                                                                                                                                                                                                                                                                                                                                                                                                                                                                                                                                                                                                                                                                                                                                                                                                                                                                                                                                                                                                                                                                                                                                                                                                                                                                                                                                                                                                                                                                                                                                                                                                                                                                                                                                                                                                                                                                                                                                                                                                                                                                                                                                                                                                                                                                                                                                                                                                                                                                                                                                                                                                                                                                                                                                                                                                                                                                                                                                                                                                                                                                                                                                                                                                                                                                                                                                                                                                                                                                                                                                                                                                                                                                                                                                                                                                                                                                                                                                                                                                                                                                                                                                                                                                                                                                                                                                                                                                                                                                                                                                                                                                                                                                                                                                                                                                                                                                                                                                                                                                                                                                                                                                                                                                                                                                                                                                                                                                                                                                                                                                                                                                                                                                                                                                                                                                                                                                                                                                                                                                                                                                                                                                                                                                                                                                                                                                                                                                                                                                                                                                                                                                                                                                                                                                                                                                                                                                                                                                                                                                                                                                                                                                                                                                                                                                                                                                                                                                                                                                                                                                                                                                                                                                                                                                                                                                                                                                                                                                                                                                                                                                                                                                                                                                                                                                                                                                                                                                                                                                                                                                                                                                                                                                                                                                                                                                                                                                                                                                                                                                                                                                                                                                                                                                                                                                                                                                                                                                                                                                                                                                                                                                                                                                                                                                                                                              |
| VC_293_16 | KX130865                                                                                                                                                                                                                                                                                                                                                                                                                                                                                                                                                                                                                                                                                                                                                                                                                                                                                                                                                                                                                                                                                                                                                                                                                                                                                                                                                                                                                                                                                                                                                                                                                                                                                                                                                                                                                                                                                                                                                                                                                                                                                                                                                                                                                                                                                                                                                                                                                                                                                                                                                                                                                                                                                                                                                                                                                                                                                                                                                                                                                                                                                                                                                                                                                                                                                                                                                                                                                                                                                                                                                                                                                                                                                                                                                                                                                                                                                                                                                                                                                                                                                                                                                                                                                                                                                                                                                                                                                                                                                                                                                                                                                                                                                                                                                                                                                                                                                                                                                                                                                                                                                                                                                                                                                                                                                                                                                                                                                                                                                                                                                                                                                                                                                                                                                                                                                                                                                                                                                                                                                                                                                                                                                                                                                                                                                                                                                                                                                                                                                                                                                                                                                                                                                                                                                                                                                                                                                                                                                                                                                                                                                                                                                                                                                                                                                                                                                                                                                                                                                                                                                                                                                                                                                                                                                                                                                                                                                                                                                                                                                                                                                                                                                                                                                                                                                                                                                                                                                                                                                                                                                                                                                                                                                                                                                                                                                                                                                                                                                                                                                                                                                                                                                                                                                                                                                                                                                                                                                                                                                                                                                                                                                                                                                                                                                                                                                                                                                                                                                                                                                                                                                                                                                                                                                                                       |
| VC_293_17 | KP869101,KP869104,KP869111,KT184309,KT184310,MK047718,MN648445,MN850622                                                                                                                                                                                                                                                                                                                                                                                                                                                                                                                                                                                                                                                                                                                                                                                                                                                                                                                                                                                                                                                                                                                                                                                                                                                                                                                                                                                                                                                                                                                                                                                                                                                                                                                                                                                                                                                                                                                                                                                                                                                                                                                                                                                                                                                                                                                                                                                                                                                                                                                                                                                                                                                                                                                                                                                                                                                                                                                                                                                                                                                                                                                                                                                                                                                                                                                                                                                                                                                                                                                                                                                                                                                                                                                                                                                                                                                                                                                                                                                                                                                                                                                                                                                                                                                                                                                                                                                                                                                                                                                                                                                                                                                                                                                                                                                                                                                                                                                                                                                                                                                                                                                                                                                                                                                                                                                                                                                                                                                                                                                                                                                                                                                                                                                                                                                                                                                                                                                                                                                                                                                                                                                                                                                                                                                                                                                                                                                                                                                                                                                                                                                                                                                                                                                                                                                                                                                                                                                                                                                                                                                                                                                                                                                                                                                                                                                                                                                                                                                                                                                                                                                                                                                                                                                                                                                                                                                                                                                                                                                                                                                                                                                                                                                                                                                                                                                                                                                                                                                                                                                                                                                                                                                                                                                                                                                                                                                                                                                                                                                                                                                                                                                                                                                                                                                                                                                                                                                                                                                                                                                                                                                                                                                                                                                                                                                                                                                                                                                                                                                                                                                                                                                                                                                        |
| VC_293_2  | MN850651                                                                                                                                                                                                                                                                                                                                                                                                                                                                                                                                                                                                                                                                                                                                                                                                                                                                                                                                                                                                                                                                                                                                                                                                                                                                                                                                                                                                                                                                                                                                                                                                                                                                                                                                                                                                                                                                                                                                                                                                                                                                                                                                                                                                                                                                                                                                                                                                                                                                                                                                                                                                                                                                                                                                                                                                                                                                                                                                                                                                                                                                                                                                                                                                                                                                                                                                                                                                                                                                                                                                                                                                                                                                                                                                                                                                                                                                                                                                                                                                                                                                                                                                                                                                                                                                                                                                                                                                                                                                                                                                                                                                                                                                                                                                                                                                                                                                                                                                                                                                                                                                                                                                                                                                                                                                                                                                                                                                                                                                                                                                                                                                                                                                                                                                                                                                                                                                                                                                                                                                                                                                                                                                                                                                                                                                                                                                                                                                                                                                                                                                                                                                                                                                                                                                                                                                                                                                                                                                                                                                                                                                                                                                                                                                                                                                                                                                                                                                                                                                                                                                                                                                                                                                                                                                                                                                                                                                                                                                                                                                                                                                                                                                                                                                                                                                                                                                                                                                                                                                                                                                                                                                                                                                                                                                                                                                                                                                                                                                                                                                                                                                                                                                                                                                                                                                                                                                                                                                                                                                                                                                                                                                                                                                                                                                                                                                                                                                                                                                                                                                                                                                                                                                                                                                                                                       |
| VC_293_3  | MK373774,MK373775                                                                                                                                                                                                                                                                                                                                                                                                                                                                                                                                                                                                                                                                                                                                                                                                                                                                                                                                                                                                                                                                                                                                                                                                                                                                                                                                                                                                                                                                                                                                                                                                                                                                                                                                                                                                                                                                                                                                                                                                                                                                                                                                                                                                                                                                                                                                                                                                                                                                                                                                                                                                                                                                                                                                                                                                                                                                                                                                                                                                                                                                                                                                                                                                                                                                                                                                                                                                                                                                                                                                                                                                                                                                                                                                                                                                                                                                                                                                                                                                                                                                                                                                                                                                                                                                                                                                                                                                                                                                                                                                                                                                                                                                                                                                                                                                                                                                                                                                                                                                                                                                                                                                                                                                                                                                                                                                                                                                                                                                                                                                                                                                                                                                                                                                                                                                                                                                                                                                                                                                                                                                                                                                                                                                                                                                                                                                                                                                                                                                                                                                                                                                                                                                                                                                                                                                                                                                                                                                                                                                                                                                                                                                                                                                                                                                                                                                                                                                                                                                                                                                                                                                                                                                                                                                                                                                                                                                                                                                                                                                                                                                                                                                                                                                                                                                                                                                                                                                                                                                                                                                                                                                                                                                                                                                                                                                                                                                                                                                                                                                                                                                                                                                                                                                                                                                                                                                                                                                                                                                                                                                                                                                                                                                                                                                                                                                                                                                                                                                                                                                                                                                                                                                                                                                                                              |
| VC_293_4  | MK327933                                                                                                                                                                                                                                                                                                                                                                                                                                                                                                                                                                                                                                                                                                                                                                                                                                                                                                                                                                                                                                                                                                                                                                                                                                                                                                                                                                                                                                                                                                                                                                                                                                                                                                                                                                                                                                                                                                                                                                                                                                                                                                                                                                                                                                                                                                                                                                                                                                                                                                                                                                                                                                                                                                                                                                                                                                                                                                                                                                                                                                                                                                                                                                                                                                                                                                                                                                                                                                                                                                                                                                                                                                                                                                                                                                                                                                                                                                                                                                                                                                                                                                                                                                                                                                                                                                                                                                                                                                                                                                                                                                                                                                                                                                                                                                                                                                                                                                                                                                                                                                                                                                                                                                                                                                                                                                                                                                                                                                                                                                                                                                                                                                                                                                                                                                                                                                                                                                                                                                                                                                                                                                                                                                                                                                                                                                                                                                                                                                                                                                                                                                                                                                                                                                                                                                                                                                                                                                                                                                                                                                                                                                                                                                                                                                                                                                                                                                                                                                                                                                                                                                                                                                                                                                                                                                                                                                                                                                                                                                                                                                                                                                                                                                                                                                                                                                                                                                                                                                                                                                                                                                                                                                                                                                                                                                                                                                                                                                                                                                                                                                                                                                                                                                                                                                                                                                                                                                                                                                                                                                                                                                                                                                                                                                                                                                                                                                                                                                                                                                                                                                                                                                                                                                                                                                                       |
| VC_293_5  | MT446423                                                                                                                                                                                                                                                                                                                                                                                                                                                                                                                                                                                                                                                                                                                                                                                                                                                                                                                                                                                                                                                                                                                                                                                                                                                                                                                                                                                                                                                                                                                                                                                                                                                                                                                                                                                                                                                                                                                                                                                                                                                                                                                                                                                                                                                                                                                                                                                                                                                                                                                                                                                                                                                                                                                                                                                                                                                                                                                                                                                                                                                                                                                                                                                                                                                                                                                                                                                                                                                                                                                                                                                                                                                                                                                                                                                                                                                                                                                                                                                                                                                                                                                                                                                                                                                                                                                                                                                                                                                                                                                                                                                                                                                                                                                                                                                                                                                                                                                                                                                                                                                                                                                                                                                                                                                                                                                                                                                                                                                                                                                                                                                                                                                                                                                                                                                                                                                                                                                                                                                                                                                                                                                                                                                                                                                                                                                                                                                                                                                                                                                                                                                                                                                                                                                                                                                                                                                                                                                                                                                                                                                                                                                                                                                                                                                                                                                                                                                                                                                                                                                                                                                                                                                                                                                                                                                                                                                                                                                                                                                                                                                                                                                                                                                                                                                                                                                                                                                                                                                                                                                                                                                                                                                                                                                                                                                                                                                                                                                                                                                                                                                                                                                                                                                                                                                                                                                                                                                                                                                                                                                                                                                                                                                                                                                                                                                                                                                                                                                                                                                                                                                                                                                                                                                                                                                       |
| VC_293_6  | MN864145                                                                                                                                                                                                                                                                                                                                                                                                                                                                                                                                                                                                                                                                                                                                                                                                                                                                                                                                                                                                                                                                                                                                                                                                                                                                                                                                                                                                                                                                                                                                                                                                                                                                                                                                                                                                                                                                                                                                                                                                                                                                                                                                                                                                                                                                                                                                                                                                                                                                                                                                                                                                                                                                                                                                                                                                                                                                                                                                                                                                                                                                                                                                                                                                                                                                                                                                                                                                                                                                                                                                                                                                                                                                                                                                                                                                                                                                                                                                                                                                                                                                                                                                                                                                                                                                                                                                                                                                                                                                                                                                                                                                                                                                                                                                                                                                                                                                                                                                                                                                                                                                                                                                                                                                                                                                                                                                                                                                                                                                                                                                                                                                                                                                                                                                                                                                                                                                                                                                                                                                                                                                                                                                                                                                                                                                                                                                                                                                                                                                                                                                                                                                                                                                                                                                                                                                                                                                                                                                                                                                                                                                                                                                                                                                                                                                                                                                                                                                                                                                                                                                                                                                                                                                                                                                                                                                                                                                                                                                                                                                                                                                                                                                                                                                                                                                                                                                                                                                                                                                                                                                                                                                                                                                                                                                                                                                                                                                                                                                                                                                                                                                                                                                                                                                                                                                                                                                                                                                                                                                                                                                                                                                                                                                                                                                                                                                                                                                                                                                                                                                                                                                                                                                                                                                                                                       |
| VC_293_7  | OM632671                                                                                                                                                                                                                                                                                                                                                                                                                                                                                                                                                                                                                                                                                                                                                                                                                                                                                                                                                                                                                                                                                                                                                                                                                                                                                                                                                                                                                                                                                                                                                                                                                                                                                                                                                                                                                                                                                                                                                                                                                                                                                                                                                                                                                                                                                                                                                                                                                                                                                                                                                                                                                                                                                                                                                                                                                                                                                                                                                                                                                                                                                                                                                                                                                                                                                                                                                                                                                                                                                                                                                                                                                                                                                                                                                                                                                                                                                                                                                                                                                                                                                                                                                                                                                                                                                                                                                                                                                                                                                                                                                                                                                                                                                                                                                                                                                                                                                                                                                                                                                                                                                                                                                                                                                                                                                                                                                                                                                                                                                                                                                                                                                                                                                                                                                                                                                                                                                                                                                                                                                                                                                                                                                                                                                                                                                                                                                                                                                                                                                                                                                                                                                                                                                                                                                                                                                                                                                                                                                                                                                                                                                                                                                                                                                                                                                                                                                                                                                                                                                                                                                                                                                                                                                                                                                                                                                                                                                                                                                                                                                                                                                                                                                                                                                                                                                                                                                                                                                                                                                                                                                                                                                                                                                                                                                                                                                                                                                                                                                                                                                                                                                                                                                                                                                                                                                                                                                                                                                                                                                                                                                                                                                                                                                                                                                                                                                                                                                                                                                                                                                                                                                                                                                                                                                                                       |
| VC_293_8  | KU255730                                                                                                                                                                                                                                                                                                                                                                                                                                                                                                                                                                                                                                                                                                                                                                                                                                                                                                                                                                                                                                                                                                                                                                                                                                                                                                                                                                                                                                                                                                                                                                                                                                                                                                                                                                                                                                                                                                                                                                                                                                                                                                                                                                                                                                                                                                                                                                                                                                                                                                                                                                                                                                                                                                                                                                                                                                                                                                                                                                                                                                                                                                                                                                                                                                                                                                                                                                                                                                                                                                                                                                                                                                                                                                                                                                                                                                                                                                                                                                                                                                                                                                                                                                                                                                                                                                                                                                                                                                                                                                                                                                                                                                                                                                                                                                                                                                                                                                                                                                                                                                                                                                                                                                                                                                                                                                                                                                                                                                                                                                                                                                                                                                                                                                                                                                                                                                                                                                                                                                                                                                                                                                                                                                                                                                                                                                                                                                                                                                                                                                                                                                                                                                                                                                                                                                                                                                                                                                                                                                                                                                                                                                                                                                                                                                                                                                                                                                                                                                                                                                                                                                                                                                                                                                                                                                                                                                                                                                                                                                                                                                                                                                                                                                                                                                                                                                                                                                                                                                                                                                                                                                                                                                                                                                                                                                                                                                                                                                                                                                                                                                                                                                                                                                                                                                                                                                                                                                                                                                                                                                                                                                                                                                                                                                                                                                                                                                                                                                                                                                                                                                                                                                                                                                                                                                                       |
| VC_293_9  | OM386662                                                                                                                                                                                                                                                                                                                                                                                                                                                                                                                                                                                                                                                                                                                                                                                                                                                                                                                                                                                                                                                                                                                                                                                                                                                                                                                                                                                                                                                                                                                                                                                                                                                                                                                                                                                                                                                                                                                                                                                                                                                                                                                                                                                                                                                                                                                                                                                                                                                                                                                                                                                                                                                                                                                                                                                                                                                                                                                                                                                                                                                                                                                                                                                                                                                                                                                                                                                                                                                                                                                                                                                                                                                                                                                                                                                                                                                                                                                                                                                                                                                                                                                                                                                                                                                                                                                                                                                                                                                                                                                                                                                                                                                                                                                                                                                                                                                                                                                                                                                                                                                                                                                                                                                                                                                                                                                                                                                                                                                                                                                                                                                                                                                                                                                                                                                                                                                                                                                                                                                                                                                                                                                                                                                                                                                                                                                                                                                                                                                                                                                                                                                                                                                                                                                                                                                                                                                                                                                                                                                                                                                                                                                                                                                                                                                                                                                                                                                                                                                                                                                                                                                                                                                                                                                                                                                                                                                                                                                                                                                                                                                                                                                                                                                                                                                                                                                                                                                                                                                                                                                                                                                                                                                                                                                                                                                                                                                                                                                                                                                                                                                                                                                                                                                                                                                                                                                                                                                                                                                                                                                                                                                                                                                                                                                                                                                                                                                                                                                                                                                                                                                                                                                                                                                                                                                       |
| VC_294_0  | MT457552,MT457553                                                                                                                                                                                                                                                                                                                                                                                                                                                                                                                                                                                                                                                                                                                                                                                                                                                                                                                                                                                                                                                                                                                                                                                                                                                                                                                                                                                                                                                                                                                                                                                                                                                                                                                                                                                                                                                                                                                                                                                                                                                                                                                                                                                                                                                                                                                                                                                                                                                                                                                                                                                                                                                                                                                                                                                                                                                                                                                                                                                                                                                                                                                                                                                                                                                                                                                                                                                                                                                                                                                                                                                                                                                                                                                                                                                                                                                                                                                                                                                                                                                                                                                                                                                                                                                                                                                                                                                                                                                                                                                                                                                                                                                                                                                                                                                                                                                                                                                                                                                                                                                                                                                                                                                                                                                                                                                                                                                                                                                                                                                                                                                                                                                                                                                                                                                                                                                                                                                                                                                                                                                                                                                                                                                                                                                                                                                                                                                                                                                                                                                                                                                                                                                                                                                                                                                                                                                                                                                                                                                                                                                                                                                                                                                                                                                                                                                                                                                                                                                                                                                                                                                                                                                                                                                                                                                                                                                                                                                                                                                                                                                                                                                                                                                                                                                                                                                                                                                                                                                                                                                                                                                                                                                                                                                                                                                                                                                                                                                                                                                                                                                                                                                                                                                                                                                                                                                                                                                                                                                                                                                                                                                                                                                                                                                                                                                                                                                                                                                                                                                                                                                                                                                                                                                                                                              |
| VC_294_1  | KY971610                                                                                                                                                                                                                                                                                                                                                                                                                                                                                                                                                                                                                                                                                                                                                                                                                                                                                                                                                                                                                                                                                                                                                                                                                                                                                                                                                                                                                                                                                                                                                                                                                                                                                                                                                                                                                                                                                                                                                                                                                                                                                                                                                                                                                                                                                                                                                                                                                                                                                                                                                                                                                                                                                                                                                                                                                                                                                                                                                                                                                                                                                                                                                                                                                                                                                                                                                                                                                                                                                                                                                                                                                                                                                                                                                                                                                                                                                                                                                                                                                                                                                                                                                                                                                                                                                                                                                                                                                                                                                                                                                                                                                                                                                                                                                                                                                                                                                                                                                                                                                                                                                                                                                                                                                                                                                                                                                                                                                                                                                                                                                                                                                                                                                                                                                                                                                                                                                                                                                                                                                                                                                                                                                                                                                                                                                                                                                                                                                                                                                                                                                                                                                                                                                                                                                                                                                                                                                                                                                                                                                                                                                                                                                                                                                                                                                                                                                                                                                                                                                                                                                                                                                                                                                                                                                                                                                                                                                                                                                                                                                                                                                                                                                                                                                                                                                                                                                                                                                                                                                                                                                                                                                                                                                                                                                                                                                                                                                                                                                                                                                                                                                                                                                                                                                                                                                                                                                                                                                                                                                                                                                                                                                                                                                                                                                                                                                                                                                                                                                                                                                                                                                                                                                                                                                                                       |
| VC_295_0  | MW358927,MW385300,OK499989                                                                                                                                                                                                                                                                                                                                                                                                                                                                                                                                                                                                                                                                                                                                                                                                                                                                                                                                                                                                                                                                                                                                                                                                                                                                                                                                                                                                                                                                                                                                                                                                                                                                                                                                                                                                                                                                                                                                                                                                                                                                                                                                                                                                                                                                                                                                                                                                                                                                                                                                                                                                                                                                                                                                                                                                                                                                                                                                                                                                                                                                                                                                                                                                                                                                                                                                                                                                                                                                                                                                                                                                                                                                                                                                                                                                                                                                                                                                                                                                                                                                                                                                                                                                                                                                                                                                                                                                                                                                                                                                                                                                                                                                                                                                                                                                                                                                                                                                                                                                                                                                                                                                                                                                                                                                                                                                                                                                                                                                                                                                                                                                                                                                                                                                                                                                                                                                                                                                                                                                                                                                                                                                                                                                                                                                                                                                                                                                                                                                                                                                                                                                                                                                                                                                                                                                                                                                                                                                                                                                                                                                                                                                                                                                                                                                                                                                                                                                                                                                                                                                                                                                                                                                                                                                                                                                                                                                                                                                                                                                                                                                                                                                                                                                                                                                                                                                                                                                                                                                                                                                                                                                                                                                                                                                                                                                                                                                                                                                                                                                                                                                                                                                                                                                                                                                                                                                                                                                                                                                                                                                                                                                                                                                                                                                                                                                                                                                                                                                                                                                                                                                                                                                                                                                                                     |
| VC_295_1  | KX078569                                                                                                                                                                                                                                                                                                                                                                                                                                                                                                                                                                                                                                                                                                                                                                                                                                                                                                                                                                                                                                                                                                                                                                                                                                                                                                                                                                                                                                                                                                                                                                                                                                                                                                                                                                                                                                                                                                                                                                                                                                                                                                                                                                                                                                                                                                                                                                                                                                                                                                                                                                                                                                                                                                                                                                                                                                                                                                                                                                                                                                                                                                                                                                                                                                                                                                                                                                                                                                                                                                                                                                                                                                                                                                                                                                                                                                                                                                                                                                                                                                                                                                                                                                                                                                                                                                                                                                                                                                                                                                                                                                                                                                                                                                                                                                                                                                                                                                                                                                                                                                                                                                                                                                                                                                                                                                                                                                                                                                                                                                                                                                                                                                                                                                                                                                                                                                                                                                                                                                                                                                                                                                                                                                                                                                                                                                                                                                                                                                                                                                                                                                                                                                                                                                                                                                                                                                                                                                                                                                                                                                                                                                                                                                                                                                                                                                                                                                                                                                                                                                                                                                                                                                                                                                                                                                                                                                                                                                                                                                                                                                                                                                                                                                                                                                                                                                                                                                                                                                                                                                                                                                                                                                                                                                                                                                                                                                                                                                                                                                                                                                                                                                                                                                                                                                                                                                                                                                                                                                                                                                                                                                                                                                                                                                                                                                                                                                                                                                                                                                                                                                                                                                                                                                                                                                                       |
| VC_295_2  | MG696114,MK295204                                                                                                                                                                                                                                                                                                                                                                                                                                                                                                                                                                                                                                                                                                                                                                                                                                                                                                                                                                                                                                                                                                                                                                                                                                                                                                                                                                                                                                                                                                                                                                                                                                                                                                                                                                                                                                                                                                                                                                                                                                                                                                                                                                                                                                                                                                                                                                                                                                                                                                                                                                                                                                                                                                                                                                                                                                                                                                                                                                                                                                                                                                                                                                                                                                                                                                                                                                                                                                                                                                                                                                                                                                                                                                                                                                                                                                                                                                                                                                                                                                                                                                                                                                                                                                                                                                                                                                                                                                                                                                                                                                                                                                                                                                                                                                                                                                                                                                                                                                                                                                                                                                                                                                                                                                                                                                                                                                                                                                                                                                                                                                                                                                                                                                                                                                                                                                                                                                                                                                                                                                                                                                                                                                                                                                                                                                                                                                                                                                                                                                                                                                                                                                                                                                                                                                                                                                                                                                                                                                                                                                                                                                                                                                                                                                                                                                                                                                                                                                                                                                                                                                                                                                                                                                                                                                                                                                                                                                                                                                                                                                                                                                                                                                                                                                                                                                                                                                                                                                                                                                                                                                                                                                                                                                                                                                                                                                                                                                                                                                                                                                                                                                                                                                                                                                                                                                                                                                                                                                                                                                                                                                                                                                                                                                                                                                                                                                                                                                                                                                                                                                                                                                                                                                                                                                              |
| VC_295_3  | KP890823,MF001355,MW367898                                                                                                                                                                                                                                                                                                                                                                                                                                                                                                                                                                                                                                                                                                                                                                                                                                                                                                                                                                                                                                                                                                                                                                                                                                                                                                                                                                                                                                                                                                                                                                                                                                                                                                                                                                                                                                                                                                                                                                                                                                                                                                                                                                                                                                                                                                                                                                                                                                                                                                                                                                                                                                                                                                                                                                                                                                                                                                                                                                                                                                                                                                                                                                                                                                                                                                                                                                                                                                                                                                                                                                                                                                                                                                                                                                                                                                                                                                                                                                                                                                                                                                                                                                                                                                                                                                                                                                                                                                                                                                                                                                                                                                                                                                                                                                                                                                                                                                                                                                                                                                                                                                                                                                                                                                                                                                                                                                                                                                                                                                                                                                                                                                                                                                                                                                                                                                                                                                                                                                                                                                                                                                                                                                                                                                                                                                                                                                                                                                                                                                                                                                                                                                                                                                                                                                                                                                                                                                                                                                                                                                                                                                                                                                                                                                                                                                                                                                                                                                                                                                                                                                                                                                                                                                                                                                                                                                                                                                                                                                                                                                                                                                                                                                                                                                                                                                                                                                                                                                                                                                                                                                                                                                                                                                                                                                                                                                                                                                                                                                                                                                                                                                                                                                                                                                                                                                                                                                                                                                                                                                                                                                                                                                                                                                                                                                                                                                                                                                                                                                                                                                                                                                                                                                                                                                     |
| VC_295_4  | MW057858                                                                                                                                                                                                                                                                                                                                                                                                                                                                                                                                                                                                                                                                                                                                                                                                                                                                                                                                                                                                                                                                                                                                                                                                                                                                                                                                                                                                                                                                                                                                                                                                                                                                                                                                                                                                                                                                                                                                                                                                                                                                                                                                                                                                                                                                                                                                                                                                                                                                                                                                                                                                                                                                                                                                                                                                                                                                                                                                                                                                                                                                                                                                                                                                                                                                                                                                                                                                                                                                                                                                                                                                                                                                                                                                                                                                                                                                                                                                                                                                                                                                                                                                                                                                                                                                                                                                                                                                                                                                                                                                                                                                                                                                                                                                                                                                                                                                                                                                                                                                                                                                                                                                                                                                                                                                                                                                                                                                                                                                                                                                                                                                                                                                                                                                                                                                                                                                                                                                                                                                                                                                                                                                                                                                                                                                                                                                                                                                                                                                                                                                                                                                                                                                                                                                                                                                                                                                                                                                                                                                                                                                                                                                                                                                                                                                                                                                                                                                                                                                                                                                                                                                                                                                                                                                                                                                                                                                                                                                                                                                                                                                                                                                                                                                                                                                                                                                                                                                                                                                                                                                                                                                                                                                                                                                                                                                                                                                                                                                                                                                                                                                                                                                                                                                                                                                                                                                                                                                                                                                                                                                                                                                                                                                                                                                                                                                                                                                                                                                                                                                                                                                                                                                                                                                                                                       |
| VC_297_0  | MT129652,MT446396,MT446411,MT446412,MT446421,MT446422,MT611523,MW233709,MW250787,MW598459                                                                                                                                                                                                                                                                                                                                                                                                                                                                                                                                                                                                                                                                                                                                                                                                                                                                                                                                                                                                                                                                                                                                                                                                                                                                                                                                                                                                                                                                                                                                                                                                                                                                                                                                                                                                                                                                                                                                                                                                                                                                                                                                                                                                                                                                                                                                                                                                                                                                                                                                                                                                                                                                                                                                                                                                                                                                                                                                                                                                                                                                                                                                                                                                                                                                                                                                                                                                                                                                                                                                                                                                                                                                                                                                                                                                                                                                                                                                                                                                                                                                                                                                                                                                                                                                                                                                                                                                                                                                                                                                                                                                                                                                                                                                                                                                                                                                                                                                                                                                                                                                                                                                                                                                                                                                                                                                                                                                                                                                                                                                                                                                                                                                                                                                                                                                                                                                                                                                                                                                                                                                                                                                                                                                                                                                                                                                                                                                                                                                                                                                                                                                                                                                                                                                                                                                                                                                                                                                                                                                                                                                                                                                                                                                                                                                                                                                                                                                                                                                                                                                                                                                                                                                                                                                                                                                                                                                                                                                                                                                                                                                                                                                                                                                                                                                                                                                                                                                                                                                                                                                                                                                                                                                                                                                                                                                                                                                                                                                                                                                                                                                                                                                                                                                                                                                                                                                                                                                                                                                                                                                                                                                                                                                                                                                                                                                                                                                                                                                                                                                                                                                                                                                                                      |
| VC_297_1  | GQ981382,KP007360,MT446420,MT446422,MT533174,MW269952,OK254198,OL451225                                                                                                                                                                                                                                                                                                                                                                                                                                                                                                                                                                                                                                                                                                                                                                                                                                                                                                                                                                                                                                                                                                                                                                                                                                                                                                                                                                                                                                                                                                                                                                                                                                                                                                                                                                                                                                                                                                                                                                                                                                                                                                                                                                                                                                                                                                                                                                                                                                                                                                                                                                                                                                                                                                                                                                                                                                                                                                                                                                                                                                                                                                                                                                                                                                                                                                                                                                                                                                                                                                                                                                                                                                                                                                                                                                                                                                                                                                                                                                                                                                                                                                                                                                                                                                                                                                                                                                                                                                                                                                                                                                                                                                                                                                                                                                                                                                                                                                                                                                                                                                                                                                                                                                                                                                                                                                                                                                                                                                                                                                                                                                                                                                                                                                                                                                                                                                                                                                                                                                                                                                                                                                                                                                                                                                                                                                                                                                                                                                                                                                                                                                                                                                                                                                                                                                                                                                                                                                                                                                                                                                                                                                                                                                                                                                                                                                                                                                                                                                                                                                                                                                                                                                                                                                                                                                                                                                                                                                                                                                                                                                                                                                                                                                                                                                                                                                                                                                                                                                                                                                                                                                                                                                                                                                                                                                                                                                                                                                                                                                                                                                                                                                                                                                                                                                                                                                                                                                                                                                                                                                                                                                                                                                                                                                                                                                                                                                                                                                                                                                                                                                                                                                                                                                                        |
| VC_297_2  | HM563683,KP007361                                                                                                                                                                                                                                                                                                                                                                                                                                                                                                                                                                                                                                                                                                                                                                                                                                                                                                                                                                                                                                                                                                                                                                                                                                                                                                                                                                                                                                                                                                                                                                                                                                                                                                                                                                                                                                                                                                                                                                                                                                                                                                                                                                                                                                                                                                                                                                                                                                                                                                                                                                                                                                                                                                                                                                                                                                                                                                                                                                                                                                                                                                                                                                                                                                                                                                                                                                                                                                                                                                                                                                                                                                                                                                                                                                                                                                                                                                                                                                                                                                                                                                                                                                                                                                                                                                                                                                                                                                                                                                                                                                                                                                                                                                                                                                                                                                                                                                                                                                                                                                                                                                                                                                                                                                                                                                                                                                                                                                                                                                                                                                                                                                                                                                                                                                                                                                                                                                                                                                                                                                                                                                                                                                                                                                                                                                                                                                                                                                                                                                                                                                                                                                                                                                                                                                                                                                                                                                                                                                                                                                                                                                                                                                                                                                                                                                                                                                                                                                                                                                                                                                                                                                                                                                                                                                                                                                                                                                                                                                                                                                                                                                                                                                                                                                                                                                                                                                                                                                                                                                                                                                                                                                                                                                                                                                                                                                                                                                                                                                                                                                                                                                                                                                                                                                                                                                                                                                                                                                                                                                                                                                                                                                                                                                                                                                                                                                                                                                                                                                                                                                                                                                                                                                                                                                              |
| VC_297_3  | KP007362,MT446392                                                                                                                                                                                                                                                                                                                                                                                                                                                                                                                                                                                                                                                                                                                                                                                                                                                                                                                                                                                                                                                                                                                                                                                                                                                                                                                                                                                                                                                                                                                                                                                                                                                                                                                                                                                                                                                                                                                                                                                                                                                                                                                                                                                                                                                                                                                                                                                                                                                                                                                                                                                                                                                                                                                                                                                                                                                                                                                                                                                                                                                                                                                                                                                                                                                                                                                                                                                                                                                                                                                                                                                                                                                                                                                                                                                                                                                                                                                                                                                                                                                                                                                                                                                                                                                                                                                                                                                                                                                                                                                                                                                                                                                                                                                                                                                                                                                                                                                                                                                                                                                                                                                                                                                                                                                                                                                                                                                                                                                                                                                                                                                                                                                                                                                                                                                                                                                                                                                                                                                                                                                                                                                                                                                                                                                                                                                                                                                                                                                                                                                                                                                                                                                                                                                                                                                                                                                                                                                                                                                                                                                                                                                                                                                                                                                                                                                                                                                                                                                                                                                                                                                                                                                                                                                                                                                                                                                                                                                                                                                                                                                                                                                                                                                                                                                                                                                                                                                                                                                                                                                                                                                                                                                                                                                                                                                                                                                                                                                                                                                                                                                                                                                                                                                                                                                                                                                                                                                                                                                                                                                                                                                                                                                                                                                                                                                                                                                                                                                                                                                                                                                                                                                                                                                                                                              |
| VC_297_4  | KP007359,OM386655                                                                                                                                                                                                                                                                                                                                                                                                                                                                                                                                                                                                                                                                                                                                                                                                                                                                                                                                                                                                                                                                                                                                                                                                                                                                                                                                                                                                                                                                                                                                                                                                                                                                                                                                                                                                                                                                                                                                                                                                                                                                                                                                                                                                                                                                                                                                                                                                                                                                                                                                                                                                                                                                                                                                                                                                                                                                                                                                                                                                                                                                                                                                                                                                                                                                                                                                                                                                                                                                                                                                                                                                                                                                                                                                                                                                                                                                                                                                                                                                                                                                                                                                                                                                                                                                                                                                                                                                                                                                                                                                                                                                                                                                                                                                                                                                                                                                                                                                                                                                                                                                                                                                                                                                                                                                                                                                                                                                                                                                                                                                                                                                                                                                                                                                                                                                                                                                                                                                                                                                                                                                                                                                                                                                                                                                                                                                                                                                                                                                                                                                                                                                                                                                                                                                                                                                                                                                                                                                                                                                                                                                                                                                                                                                                                                                                                                                                                                                                                                                                                                                                                                                                                                                                                                                                                                                                                                                                                                                                                                                                                                                                                                                                                                                                                                                                                                                                                                                                                                                                                                                                                                                                                                                                                                                                                                                                                                                                                                                                                                                                                                                                                                                                                                                                                                                                                                                                                                                                                                                                                                                                                                                                                                                                                                                                                                                                                                                                                                                                                                                                                                                                                                                                                                                                                              |
| VC_297_5  | HM071924,HQ829472,KT176190,KU878968,KU878969,MH051917,MK234886,MT150133,MT682711,MW149274,MW679410,MZ561532,OK335775,OL780484                                                                                                                                                                                                                                                                                                                                                                                                                                                                                                                                                                                                                                                                                                                                                                                                                                                                                                                                                                                                                                                                                                                                                                                                                                                                                                                                                                                                                                                                                                                                                                                                                                                                                                                                                                                                                                                                                                                                                                                                                                                                                                                                                                                                                                                                                                                                                                                                                                                                                                                                                                                                                                                                                                                                                                                                                                                                                                                                                                                                                                                                                                                                                                                                                                                                                                                                                                                                                                                                                                                                                                                                                                                                                                                                                                                                                                                                                                                                                                                                                                                                                                                                                                                                                                                                                                                                                                                                                                                                                                                                                                                                                                                                                                                                                                                                                                                                                                                                                                                                                                                                                                                                                                                                                                                                                                                                                                                                                                                                                                                                                                                                                                                                                                                                                                                                                                                                                                                                                                                                                                                                                                                                                                                                                                                                                                                                                                                                                                                                                                                                                                                                                                                                                                                                                                                                                                                                                                                                                                                                                                                                                                                                                                                                                                                                                                                                                                                                                                                                                                                                                                                                                                                                                                                                                                                                                                                                                                                                                                                                                                                                                                                                                                                                                                                                                                                                                                                                                                                                                                                                                                                                                                                                                                                                                                                                                                                                                                                                                                                                                                                                                                                                                                                                                                                                                                                                                                                                                                                                                                                                                                                                                                                                                                                                                                                                                                                                                                                                                                                                                                                                                                                                  |
| VC_297_6  | EF469154,EU863409,MH051913,MH791409,MK310184,MN850609,MN850621,MT129654,OL770107,OP292222,OV876907,OV877765                                                                                                                                                                                                                                                                                                                                                                                                                                                                                                                                                                                                                                                                                                                                                                                                                                                                                                                                                                                                                                                                                                                                                                                                                                                                                                                                                                                                                                                                                                                                                                                                                                                                                                                                                                                                                                                                                                                                                                                                                                                                                                                                                                                                                                                                                                                                                                                                                                                                                                                                                                                                                                                                                                                                                                                                                                                                                                                                                                                                                                                                                                                                                                                                                                                                                                                                                                                                                                                                                                                                                                                                                                                                                                                                                                                                                                                                                                                                                                                                                                                                                                                                                                                                                                                                                                                                                                                                                                                                                                                                                                                                                                                                                                                                                                                                                                                                                                                                                                                                                                                                                                                                                                                                                                                                                                                                                                                                                                                                                                                                                                                                                                                                                                                                                                                                                                                                                                                                                                                                                                                                                                                                                                                                                                                                                                                                                                                                                                                                                                                                                                                                                                                                                                                                                                                                                                                                                                                                                                                                                                                                                                                                                                                                                                                                                                                                                                                                                                                                                                                                                                                                                                                                                                                                                                                                                                                                                                                                                                                                                                                                                                                                                                                                                                                                                                                                                                                                                                                                                                                                                                                                                                                                                                                                                                                                                                                                                                                                                                                                                                                                                                                                                                                                                                                                                                                                                                                                                                                                                                                                                                                                                                                                                                                                                                                                                                                                                                                                                                                                                                                                                                                                                    |
| VC_297_7  | MK295203                                                                                                                                                                                                                                                                                                                                                                                                                                                                                                                                                                                                                                                                                                                                                                                                                                                                                                                                                                                                                                                                                                                                                                                                                                                                                                                                                                                                                                                                                                                                                                                                                                                                                                                                                                                                                                                                                                                                                                                                                                                                                                                                                                                                                                                                                                                                                                                                                                                                                                                                                                                                                                                                                                                                                                                                                                                                                                                                                                                                                                                                                                                                                                                                                                                                                                                                                                                                                                                                                                                                                                                                                                                                                                                                                                                                                                                                                                                                                                                                                                                                                                                                                                                                                                                                                                                                                                                                                                                                                                                                                                                                                                                                                                                                                                                                                                                                                                                                                                                                                                                                                                                                                                                                                                                                                                                                                                                                                                                                                                                                                                                                                                                                                                                                                                                                                                                                                                                                                                                                                                                                                                                                                                                                                                                                                                                                                                                                                                                                                                                                                                                                                                                                                                                                                                                                                                                                                                                                                                                                                                                                                                                                                                                                                                                                                                                                                                                                                                                                                                                                                                                                                                                                                                                                                                                                                                                                                                                                                                                                                                                                                                                                                                                                                                                                                                                                                                                                                                                                                                                                                                                                                                                                                                                                                                                                                                                                                                                                                                                                                                                                                                                                                                                                                                                                                                                                                                                                                                                                                                                                                                                                                                                                                                                                                                                                                                                                                                                                                                                                                                                                                                                                                                                                                                                       |
| VC_299_0  | MK448704,MK448707,MK448709,MK448710                                                                                                                                                                                                                                                                                                                                                                                                                                                                                                                                                                                                                                                                                                                                                                                                                                                                                                                                                                                                                                                                                                                                                                                                                                                                                                                                                                                                                                                                                                                                                                                                                                                                                                                                                                                                                                                                                                                                                                                                                                                                                                                                                                                                                                                                                                                                                                                                                                                                                                                                                                                                                                                                                                                                                                                                                                                                                                                                                                                                                                                                                                                                                                                                                                                                                                                                                                                                                                                                                                                                                                                                                                                                                                                                                                                                                                                                                                                                                                                                                                                                                                                                                                                                                                                                                                                                                                                                                                                                                                                                                                                                                                                                                                                                                                                                                                                                                                                                                                                                                                                                                                                                                                                                                                                                                                                                                                                                                                                                                                                                                                                                                                                                                                                                                                                                                                                                                                                                                                                                                                                                                                                                                                                                                                                                                                                                                                                                                                                                                                                                                                                                                                                                                                                                                                                                                                                                                                                                                                                                                                                                                                                                                                                                                                                                                                                                                                                                                                                                                                                                                                                                                                                                                                                                                                                                                                                                                                                                                                                                                                                                                                                                                                                                                                                                                                                                                                                                                                                                                                                                                                                                                                                                                                                                                                                                                                                                                                                                                                                                                                                                                                                                                                                                                                                                                                                                                                                                                                                                                                                                                                                                                                                                                                                                                                                                                                                                                                                                                                                                                                                                                                                                                                                                                            |
| VC_3_0    | CP000623,CP006624,CP008753,DQ087285,GU911304,HM461982,JX681814,LC528882,LC667452,MW072790,MZ375754,OM304382,OM638608,OM638609,OM638610,OM638611,ON135435                                                                                                                                                                                                                                                                                                                                                                                                                                                                                                                                                                                                                                                                                                                                                                                                                                                                                                                                                                                                                                                                                                                                                                                                                                                                                                                                                                                                                                                                                                                                                                                                                                                                                                                                                                                                                                                                                                                                                                                                                                                                                                                                                                                                                                                                                                                                                                                                                                                                                                                                                                                                                                                                                                                                                                                                                                                                                                                                                                                                                                                                                                                                                                                                                                                                                                                                                                                                                                                                                                                                                                                                                                                                                                                                                                                                                                                                                                                                                                                                                                                                                                                                                                                                                                                                                                                                                                                                                                                                                                                                                                                                                                                                                                                                                                                                                                                                                                                                                                                                                                                                                                                                                                                                                                                                                                                                                                                                                                                                                                                                                                                                                                                                                                                                                                                                                                                                                                                                                                                                                                                                                                                                                                                                                                                                                                                                                                                                                                                                                                                                                                                                                                                                                                                                                                                                                                                                                                                                                                                                                                                                                                                                                                                                                                                                                                                                                                                                                                                                                                                                                                                                                                                                                                                                                                                                                                                                                                                                                                                                                                                                                                                                                                                                                                                                                                                                                                                                                                                                                                                                                                                                                                                                                                                                                                                                                                                                                                                                                                                                                                                                                                                                                                                                                                                                                                                                                                                                                                                                                                                                                                                                                                                                                                                                                                                                                                                                                                                                                                                                                                                                                                       |
| VC_30_0   | MW722521,MW790496                                                                                                                                                                                                                                                                                                                                                                                                                                                                                                                                                                                                                                                                                                                                                                                                                                                                                                                                                                                                                                                                                                                                                                                                                                                                                                                                                                                                                                                                                                                                                                                                                                                                                                                                                                                                                                                                                                                                                                                                                                                                                                                                                                                                                                                                                                                                                                                                                                                                                                                                                                                                                                                                                                                                                                                                                                                                                                                                                                                                                                                                                                                                                                                                                                                                                                                                                                                                                                                                                                                                                                                                                                                                                                                                                                                                                                                                                                                                                                                                                                                                                                                                                                                                                                                                                                                                                                                                                                                                                                                                                                                                                                                                                                                                                                                                                                                                                                                                                                                                                                                                                                                                                                                                                                                                                                                                                                                                                                                                                                                                                                                                                                                                                                                                                                                                                                                                                                                                                                                                                                                                                                                                                                                                                                                                                                                                                                                                                                                                                                                                                                                                                                                                                                                                                                                                                                                                                                                                                                                                                                                                                                                                                                                                                                                                                                                                                                                                                                                                                                                                                                                                                                                                                                                                                                                                                                                                                                                                                                                                                                                                                                                                                                                                                                                                                                                                                                                                                                                                                                                                                                                                                                                                                                                                                                                                                                                                                                                                                                                                                                                                                                                                                                                                                                                                                                                                                                                                                                                                                                                                                                                                                                                                                                                                                                                                                                                                                                                                                                                                                                                                                                                                                                                                                                              |
| VC_30_1   | AB102868,AB362338,AB426868,AF217253,AF527608,AY052766,BK000583,CP051272,CP051278,CP051279,CP051285,CP051288,DQ003260,EU570103,FJ000341,GQ422450,GQ422451,GU573886,JF900176,JQ806763,KR296686,KR296687,KR296688,KU878967,KU927491,KU927492,KU927494,KU927495,KU927496,KU927498,KX776161,LC730322,LT714109,MF188997,MG407615,MG6969415,MH370387,MK770414,MK770415,MK972685,MK972686,MK972687,MK972692,MK972693,MK972694,MN161573,MT774487,MT932212,MW013502,MW013503,MW355480,OP265889,OP377721                                                                                                                                                                                                                                                                                                                                                                                                                                                                                                                                                                                                                                                                                                                                                                                                                                                                                                                                                                                                                                                                                                                                                                                                                                                                                                                                                                                                                                                                                                                                                                                                                                                                                                                                                                                                                                                                                                                                                                                                                                                                                                                                                                                                                                                                                                                                                                                                                                                                                                                                                                                                                                                                                                                                                                                                                                                                                                                                                                                                                                                                                                                                                                                                                                                                                                                                                                                                                                                                                                                                                                                                                                                                                                                                                                                                                                                                                                                                                                                                                                                                                                                                                                                                                                                                                                                                                                                                                                                                                                                                                                                                                                                                                                                                                                                                                                                                                                                                                                                                                                                                                                                                                                                                                                                                                                                                                                                                                                                                                                                                                                                                                                                                                                                                                                                                                                                                                                                                                                                                                                                                                                                                                                                                                                                                                                                                                                                                                                                                                                                                                                                                                                                                                                                                                                                                                                                                                                                                                                                                                                                                                                                                                                                                                                                                                                                                                                                                                                                                                                                                                                                                                                                                                                                                                                                                                                                                                                                                                                                                                                                                                                                                                                                                                                                                                                                                                                                                                                                                                                                                                                                                                                                                                                                                                                                                                                                                                                                                                                                                                                                                                                                                                                                                                                                                                                                                                                                                                                                                                                                                                                                                                                                                                                                                                                  |
| VC_300_0  | MK448750                                                                                                                                                                                                                                                                                                                                                                                                                                                                                                                                                                                                                                                                                                                                                                                                                                                                                                                                                                                                                                                                                                                                                                                                                                                                                                                                                                                                                                                                                                                                                                                                                                                                                                                                                                                                                                                                                                                                                                                                                                                                                                                                                                                                                                                                                                                                                                                                                                                                                                                                                                                                                                                                                                                                                                                                                                                                                                                                                                                                                                                                                                                                                                                                                                                                                                                                                                                                                                                                                                                                                                                                                                                                                                                                                                                                                                                                                                                                                                                                                                                                                                                                                                                                                                                                                                                                                                                                                                                                                                                                                                                                                                                                                                                                                                                                                                                                                                                                                                                                                                                                                                                                                                                                                                                                                                                                                                                                                                                                                                                                                                                                                                                                                                                                                                                                                                                                                                                                                                                                                                                                                                                                                                                                                                                                                                                                                                                                                                                                                                                                                                                                                                                                                                                                                                                                                                                                                                                                                                                                                                                                                                                                                                                                                                                                                                                                                                                                                                                                                                                                                                                                                                                                                                                                                                                                                                                                                                                                                                                                                                                                                                                                                                                                                                                                                                                                                                                                                                                                                                                                                                                                                                                                                                                                                                                                                                                                                                                                                                                                                                                                                                                                                                                                                                                                                                                                                                                                                                                                                                                                                                                                                                                                                                                                                                                                                                                                                                                                                                                                                                                                                                                                                                                                                                                       |
| VC_300_1  | MK448995                                                                                                                                                                                                                                                                                                                                                                                                                                                                                                                                                                                                                                                                                                                                                                                                                                                                                                                                                                                                                                                                                                                                                                                                                                                                                                                                                                                                                                                                                                                                                                                                                                                                                                                                                                                                                                                                                                                                                                                                                                                                                                                                                                                                                                                                                                                                                                                                                                                                                                                                                                                                                                                                                                                                                                                                                                                                                                                                                                                                                                                                                                                                                                                                                                                                                                                                                                                                                                                                                                                                                                                                                                                                                                                                                                                                                                                                                                                                                                                                                                                                                                                                                                                                                                                                                                                                                                                                                                                                                                                                                                                                                                                                                                                                                                                                                                                                                                                                                                                                                                                                                                                                                                                                                                                                                                                                                                                                                                                                                                                                                                                                                                                                                                                                                                                                                                                                                                                                                                                                                                                                                                                                                                                                                                                                                                                                                                                                                                                                                                                                                                                                                                                                                                                                                                                                                                                                                                                                                                                                                                                                                                                                                                                                                                                                                                                                                                                                                                                                                                                                                                                                                                                                                                                                                                                                                                                                                                                                                                                                                                                                                                                                                                                                                                                                                                                                                                                                                                                                                                                                                                                                                                                                                                                                                                                                                                                                                                                                                                                                                                                                                                                                                                                                                                                                                                                                                                                                                                                                                                                                                                                                                                                                                                                                                                                                                                                                                                                                                                                                                                                                                                                                                                                                                                                       |
| VC_300_2  | MK448740,MK448917                                                                                                                                                                                                                                                                                                                                                                                                                                                                                                                                                                                                                                                                                                                                                                                                                                                                                                                                                                                                                                                                                                                                                                                                                                                                                                                                                                                                                                                                                                                                                                                                                                                                                                                                                                                                                                                                                                                                                                                                                                                                                                                                                                                                                                                                                                                                                                                                                                                                                                                                                                                                                                                                                                                                                                                                                                                                                                                                                                                                                                                                                                                                                                                                                                                                                                                                                                                                                                                                                                                                                                                                                                                                                                                                                                                                                                                                                                                                                                                                                                                                                                                                                                                                                                                                                                                                                                                                                                                                                                                                                                                                                                                                                                                                                                                                                                                                                                                                                                                                                                                                                                                                                                                                                                                                                                                                                                                                                                                                                                                                                                                                                                                                                                                                                                                                                                                                                                                                                                                                                                                                                                                                                                                                                                                                                                                                                                                                                                                                                                                                                                                                                                                                                                                                                                                                                                                                                                                                                                                                                                                                                                                                                                                                                                                                                                                                                                                                                                                                                                                                                                                                                                                                                                                                                                                                                                                                                                                                                                                                                                                                                                                                                                                                                                                                                                                                                                                                                                                                                                                                                                                                                                                                                                                                                                                                                                                                                                                                                                                                                                                                                                                                                                                                                                                                                                                                                                                                                                                                                                                                                                                                                                                                                                                                                                                                                                                                                                                                                                                                                                                                                                                                                                                                                                              |
| VC_300_3  | MK448675,MK448676,MK448688,MK448690,MK448694,MK448772,MK448778,MK448782,MK448850,MK448859,MK448877,MK448931,MK448955,MK448962,MK448966,MK448973,MK448975,MK449004,OL774870                                                                                                                                                                                                                                                                                                                                                                                                                                                                                                                                                                                                                                                                                                                                                                                                                                                                                                                                                                                                                                                                                                                                                                                                                                                                                                                                                                                                                                                                                                                                                                                                                                                                                                                                                                                                                                                                                                                                                                                                                                                                                                                                                                                                                                                                                                                                                                                                                                                                                                                                                                                                                                                                                                                                                                                                                                                                                                                                                                                                                                                                                                                                                                                                                                                                                                                                                                                                                                                                                                                                                                                                                                                                                                                                                                                                                                                                                                                                                                                                                                                                                                                                                                                                                                                                                                                                                                                                                                                                                                                                                                                                                                                                                                                                                                                                                                                                                                                                                                                                                                                                                                                                                                                                                                                                                                                                                                                                                                                                                                                                                                                                                                                                                                                                                                                                                                                                                                                                                                                                                                                                                                                                                                                                                                                                                                                                                                                                                                                                                                                                                                                                                                                                                                                                                                                                                                                                                                                                                                                                                                                                                                                                                                                                                                                                                                                                                                                                                                                                                                                                                                                                                                                                                                                                                                                                                                                                                                                                                                                                                                                                                                                                                                                                                                                                                                                                                                                                                                                                                                                                                                                                                                                                                                                                                                                                                                                                                                                                                                                                                                                                                                                                                                                                                                                                                                                                                                                                                                                                                                                                                                                                                                                                                                                                                                                                                                                                                                                                                                                                                                                                                     |
| VC_301_0  | MK448832,MK449008                                                                                                                                                                                                                                                                                                                                                                                                                                                                                                                                                                                                                                                                                                                                                                                                                                                                                                                                                                                                                                                                                                                                                                                                                                                                                                                                                                                                                                                                                                                                                                                                                                                                                                                                                                                                                                                                                                                                                                                                                                                                                                                                                                                                                                                                                                                                                                                                                                                                                                                                                                                                                                                                                                                                                                                                                                                                                                                                                                                                                                                                                                                                                                                                                                                                                                                                                                                                                                                                                                                                                                                                                                                                                                                                                                                                                                                                                                                                                                                                                                                                                                                                                                                                                                                                                                                                                                                                                                                                                                                                                                                                                                                                                                                                                                                                                                                                                                                                                                                                                                                                                                                                                                                                                                                                                                                                                                                                                                                                                                                                                                                                                                                                                                                                                                                                                                                                                                                                                                                                                                                                                                                                                                                                                                                                                                                                                                                                                                                                                                                                                                                                                                                                                                                                                                                                                                                                                                                                                                                                                                                                                                                                                                                                                                                                                                                                                                                                                                                                                                                                                                                                                                                                                                                                                                                                                                                                                                                                                                                                                                                                                                                                                                                                                                                                                                                                                                                                                                                                                                                                                                                                                                                                                                                                                                                                                                                                                                                                                                                                                                                                                                                                                                                                                                                                                                                                                                                                                                                                                                                                                                                                                                                                                                                                                                                                                                                                                                                                                                                                                                                                                                                                                                                                                                              |
| VC_302_0  | MK819239,ON857931                                                                                                                                                                                                                                                                                                                                                                                                                                                                                                                                                                                                                                                                                                                                                                                                                                                                                                                                                                                                                                                                                                                                                                                                                                                                                                                                                                                                                                                                                                                                                                                                                                                                                                                                                                                                                                                                                                                                                                                                                                                                                                                                                                                                                                                                                                                                                                                                                                                                                                                                                                                                                                                                                                                                                                                                                                                                                                                                                                                                                                                                                                                                                                                                                                                                                                                                                                                                                                                                                                                                                                                                                                                                                                                                                                                                                                                                                                                                                                                                                                                                                                                                                                                                                                                                                                                                                                                                                                                                                                                                                                                                                                                                                                                                                                                                                                                                                                                                                                                                                                                                                                                                                                                                                                                                                                                                                                                                                                                                                                                                                                                                                                                                                                                                                                                                                                                                                                                                                                                                                                                                                                                                                                                                                                                                                                                                                                                                                                                                                                                                                                                                                                                                                                                                                                                                                                                                                                                                                                                                                                                                                                                                                                                                                                                                                                                                                                                                                                                                                                                                                                                                                                                                                                                                                                                                                                                                                                                                                                                                                                                                                                                                                                                                                                                                                                                                                                                                                                                                                                                                                                                                                                                                                                                                                                                                                                                                                                                                                                                                                                                                                                                                                                                                                                                                                                                                                                                                                                                                                                                                                                                                                                                                                                                                                                                                                                                                                                                                                                                                                                                                                                                                                                                                                                              |
| VC_303_0  | MG592403,MG592404,MG592405,MG592551,MN592897,MW824406                                                                                                                                                                                                                                                                                                                                                                                                                                                                                                                                                                                                                                                                                                                                                                                                                                                                                                                                                                                                                                                                                                                                                                                                                                                                                                                                                                                                                                                                                                                                                                                                                                                                                                                                                                                                                                                                                                                                                                                                                                                                                                                                                                                                                                                                                                                                                                                                                                                                                                                                                                                                                                                                                                                                                                                                                                                                                                                                                                                                                                                                                                                                                                                                                                                                                                                                                                                                                                                                                                                                                                                                                                                                                                                                                                                                                                                                                                                                                                                                                                                                                                                                                                                                                                                                                                                                                                                                                                                                                                                                                                                                                                                                                                                                                                                                                                                                                                                                                                                                                                                                                                                                                                                                                                                                                                                                                                                                                                                                                                                                                                                                                                                                                                                                                                                                                                                                                                                                                                                                                                                                                                                                                                                                                                                                                                                                                                                                                                                                                                                                                                                                                                                                                                                                                                                                                                                                                                                                                                                                                                                                                                                                                                                                                                                                                                                                                                                                                                                                                                                                                                                                                                                                                                                                                                                                                                                                                                                                                                                                                                                                                                                                                                                                                                                                                                                                                                                                                                                                                                                                                                                                                                                                                                                                                                                                                                                                                                                                                                                                                                                                                                                                                                                                                                                                                                                                                                                                                                                                                                                                                                                                                                                                                                                                                                                                                                                                                                                                                                                                                                                                                                                                                                                                          |
| VC_304_0  | KM389210,KU199710,MW748993,MZ089728,ON778007                                                                                                                                                                                                                                                                                                                                                                                                                                                                                                                                                                                                                                                                                                                                                                                                                                                                                                                                                                                                                                                                                                                                                                                                                                                                                                                                                                                                                                                                                                                                                                                                                                                                                                                                                                                                                                                                                                                                                                                                                                                                                                                                                                                                                                                                                                                                                                                                                                                                                                                                                                                                                                                                                                                                                                                                                                                                                                                                                                                                                                                                                                                                                                                                                                                                                                                                                                                                                                                                                                                                                                                                                                                                                                                                                                                                                                                                                                                                                                                                                                                                                                                                                                                                                                                                                                                                                                                                                                                                                                                                                                                                                                                                                                                                                                                                                                                                                                                                                                                                                                                                                                                                                                                                                                                                                                                                                                                                                                                                                                                                                                                                                                                                                                                                                                                                                                                                                                                                                                                                                                                                                                                                                                                                                                                                                                                                                                                                                                                                                                                                                                                                                                                                                                                                                                                                                                                                                                                                                                                                                                                                                                                                                                                                                                                                                                                                                                                                                                                                                                                                                                                                                                                                                                                                                                                                                                                                                                                                                                                                                                                                                                                                                                                                                                                                                                                                                                                                                                                                                                                                                                                                                                                                                                                                                                                                                                                                                                                                                                                                                                                                                                                                                                                                                                                                                                                                                                                                                                                                                                                                                                                                                                                                                                                                                                                                                                                                                                                                                                                                                                                                                                                                                                                                                   |
| VC_304_1  | HQ711984,JX403939,KU310943,MK511001,MK511002,MK511003,MK511004,MK511005,MK511006,MK511007,MK511008,MK511009,MK511010,MK511011,MK511012,MK511013,MK511014,MK511015,MK511016,MZ773939                                                                                                                                                                                                                                                                                                                                                                                                                                                                                                                                                                                                                                                                                                                                                                                                                                                                                                                                                                                                                                                                                                                                                                                                                                                                                                                                                                                                                                                                                                                                                                                                                                                                                                                                                                                                                                                                                                                                                                                                                                                                                                                                                                                                                                                                                                                                                                                                                                                                                                                                                                                                                                                                                                                                                                                                                                                                                                                                                                                                                                                                                                                                                                                                                                                                                                                                                                                                                                                                                                                                                                                                                                                                                                                                                                                                                                                                                                                                                                                                                                                                                                                                                                                                                                                                                                                                                                                                                                                                                                                                                                                                                                                                                                                                                                                                                                                                                                                                                                                                                                                                                                                                                                                                                                                                                                                                                                                                                                                                                                                                                                                                                                                                                                                                                                                                                                                                                                                                                                                                                                                                                                                                                                                                                                                                                                                                                                                                                                                                                                                                                                                                                                                                                                                                                                                                                                                                                                                                                                                                                                                                                                                                                                                                                                                                                                                                                                                                                                                                                                                                                                                                                                                                                                                                                                                                                                                                                                                                                                                                                                                                                                                                                                                                                                                                                                                                                                                                                                                                                                                                                                                                                                                                                                                                                                                                                                                                                                                                                                                                                                                                                                                                                                                                                                                                                                                                                                                                                                                                                                                                                                                                                                                                                                                                                                                                                                                                                                                                                                                                                                                                            |
| VC_305_0  | KU708004                                                                                                                                                                                                                                                                                                                                                                                                                                                                                                                                                                                                                                                                                                                                                                                                                                                                                                                                                                                                                                                                                                                                                                                                                                                                                                                                                                                                                                                                                                                                                                                                                                                                                                                                                                                                                                                                                                                                                                                                                                                                                                                                                                                                                                                                                                                                                                                                                                                                                                                                                                                                                                                                                                                                                                                                                                                                                                                                                                                                                                                                                                                                                                                                                                                                                                                                                                                                                                                                                                                                                                                                                                                                                                                                                                                                                                                                                                                                                                                                                                                                                                                                                                                                                                                                                                                                                                                                                                                                                                                                                                                                                                                                                                                                                                                                                                                                                                                                                                                                                                                                                                                                                                                                                                                                                                                                                                                                                                                                                                                                                                                                                                                                                                                                                                                                                                                                                                                                                                                                                                                                                                                                                                                                                                                                                                                                                                                                                                                                                                                                                                                                                                                                                                                                                                                                                                                                                                                                                                                                                                                                                                                                                                                                                                                                                                                                                                                                                                                                                                                                                                                                                                                                                                                                                                                                                                                                                                                                                                                                                                                                                                                                                                                                                                                                                                                                                                                                                                                                                                                                                                                                                                                                                                                                                                                                                                                                                                                                                                                                                                                                                                                                                                                                                                                                                                                                                                                                                                                                                                                                                                                                                                                                                                                                                                                                                                                                                                                                                                                                                                                                                                                                                                                                                                                       |
| VC_305_1  | MW862109                                                                                                                                                                                                                                                                                                                                                                                                                                                                                                                                                                                                                                                                                                                                                                                                                                                                                                                                                                                                                                                                                                                                                                                                                                                                                                                                                                                                                                                                                                                                                                                                                                                                                                                                                                                                                                                                                                                                                                                                                                                                                                                                                                                                                                                                                                                                                                                                                                                                                                                                                                                                                                                                                                                                                                                                                                                                                                                                                                                                                                                                                                                                                                                                                                                                                                                                                                                                                                                                                                                                                                                                                                                                                                                                                                                                                                                                                                                                                                                                                                                                                                                                                                                                                                                                                                                                                                                                                                                                                                                                                                                                                                                                                                                                                                                                                                                                                                                                                                                                                                                                                                                                                                                                                                                                                                                                                                                                                                                                                                                                                                                                                                                                                                                                                                                                                                                                                                                                                                                                                                                                                                                                                                                                                                                                                                                                                                                                                                                                                                                                                                                                                                                                                                                                                                                                                                                                                                                                                                                                                                                                                                                                                                                                                                                                                                                                                                                                                                                                                                                                                                                                                                                                                                                                                                                                                                                                                                                                                                                                                                                                                                                                                                                                                                                                                                                                                                                                                                                                                                                                                                                                                                                                                                                                                                                                                                                                                                                                                                                                                                                                                                                                                                                                                                                                                                                                                                                                                                                                                                                                                                                                                                                                                                                                                                                                                                                                                                                                                                                                                                                                                                                                                                                                                                                       |
| VC_306_0  | KX581090,KX581091,KX581092,KX581093,KX581094,KX581095,KX581096,KX581097,KX581098,KX581099,KX581100,KY658673,KY658674,KY658675,KY658676,KY658677,KY658678,KY658679,KY658680,MK672799,MK672800,MK672801,MK672803,MK672804                                                                                                                                                                                                                                                                                                                                                                                                                                                                                                                                                                                                                                                                                                                                                                                                                                                                                                                                                                                                                                                                                                                                                                                                                                                                                                                                                                                                                                                                                                                                                                                                                                                                                                                                                                                                                                                                                                                                                                                                                                                                                                                                                                                                                                                                                                                                                                                                                                                                                                                                                                                                                                                                                                                                                                                                                                                                                                                                                                                                                                                                                                                                                                                                                                                                                                                                                                                                                                                                                                                                                                                                                                                                                                                                                                                                                                                                                                                                                                                                                                                                                                                                                                                                                                                                                                                                                                                                                                                                                                                                                                                                                                                                                                                                                                                                                                                                                                                                                                                                                                                                                                                                                                                                                                                                                                                                                                                                                                                                                                                                                                                                                                                                                                                                                                                                                                                                                                                                                                                                                                                                                                                                                                                                                                                                                                                                                                                                                                                                                                                                                                                                                                                                                                                                                                                                                                                                                                                                                                                                                                                                                                                                                                                                                                                                                                                                                                                                                                                                                                                                                                                                                                                                                                                                                                                                                                                                                                                                                                                                                                                                                                                                                                                                                                                                                                                                                                                                                                                                                                                                                                                                                                                                                                                                                                                                                                                                                                                                                                                                                                                                                                                                                                                                                                                                                                                                                                                                                                                                                                                                                                                                                                                                                                                                                                                                                                                                                                                                                                                                                                        |
| VC_307_0  | HQ141411,OP650937                                                                                                                                                                                                                                                                                                                                                                                                                                                                                                                                                                                                                                                                                                                                                                                                                                                                                                                                                                                                                                                                                                                                                                                                                                                                                                                                                                                                                                                                                                                                                                                                                                                                                                                                                                                                                                                                                                                                                                                                                                                                                                                                                                                                                                                                                                                                                                                                                                                                                                                                                                                                                                                                                                                                                                                                                                                                                                                                                                                                                                                                                                                                                                                                                                                                                                                                                                                                                                                                                                                                                                                                                                                                                                                                                                                                                                                                                                                                                                                                                                                                                                                                                                                                                                                                                                                                                                                                                                                                                                                                                                                                                                                                                                                                                                                                                                                                                                                                                                                                                                                                                                                                                                                                                                                                                                                                                                                                                                                                                                                                                                                                                                                                                                                                                                                                                                                                                                                                                                                                                                                                                                                                                                                                                                                                                                                                                                                                                                                                                                                                                                                                                                                                                                                                                                                                                                                                                                                                                                                                                                                                                                                                                                                                                                                                                                                                                                                                                                                                                                                                                                                                                                                                                                                                                                                                                                                                                                                                                                                                                                                                                                                                                                                                                                                                                                                                                                                                                                                                                                                                                                                                                                                                                                                                                                                                                                                                                                                                                                                                                                                                                                                                                                                                                                                                                                                                                                                                                                                                                                                                                                                                                                                                                                                                                                                                                                                                                                                                                                                                                                                                                                                                                                                                                                              |
| VC_307_1  | MG788324                                                                                                                                                                                                                                                                                                                                                                                                                                                                                                                                                                                                                                                                                                                                                                                                                                                                                                                                                                                                                                                                                                                                                                                                                                                                                                                                                                                                                                                                                                                                                                                                                                                                                                                                                                                                                                                                                                                                                                                                                                                                                                                                                                                                                                                                                                                                                                                                                                                                                                                                                                                                                                                                                                                                                                                                                                                                                                                                                                                                                                                                                                                                                                                                                                                                                                                                                                                                                                                                                                                                                                                                                                                                                                                                                                                                                                                                                                                                                                                                                                                                                                                                                                                                                                                                                                                                                                                                                                                                                                                                                                                                                                                                                                                                                                                                                                                                                                                                                                                                                                                                                                                                                                                                                                                                                                                                                                                                                                                                                                                                                                                                                                                                                                                                                                                                                                                                                                                                                                                                                                                                                                                                                                                                                                                                                                                                                                                                                                                                                                                                                                                                                                                                                                                                                                                                                                                                                                                                                                                                                                                                                                                                                                                                                                                                                                                                                                                                                                                                                                                                                                                                                                                                                                                                                                                                                                                                                                                                                                                                                                                                                                                                                                                                                                                                                                                                                                                                                                                                                                                                                                                                                                                                                                                                                                                                                                                                                                                                                                                                                                                                                                                                                                                                                                                                                                                                                                                                                                                                                                                                                                                                                                                                                                                                                                                                                                                                                                                                                                                                                                                                                                                                                                                                                                                       |
| VC_308_0  | LT985589,LT993247                                                                                                                                                                                                                                                                                                                                                                                                                                                                                                                                                                                                                                                                                                                                                                                                                                                                                                                                                                                                                                                                                                                                                                                                                                                                                                                                                                                                                                                                                                                                                                                                                                                                                                                                                                                                                                                                                                                                                                                                                                                                                                                                                                                                                                                                                                                                                                                                                                                                                                                                                                                                                                                                                                                                                                                                                                                                                                                                                                                                                                                                                                                                                                                                                                                                                                                                                                                                                                                                                                                                                                                                                                                                                                                                                                                                                                                                                                                                                                                                                                                                                                                                                                                                                                                                                                                                                                                                                                                                                                                                                                                                                                                                                                                                                                                                                                                                                                                                                                                                                                                                                                                                                                                                                                                                                                                                                                                                                                                                                                                                                                                                                                                                                                                                                                                                                                                                                                                                                                                                                                                                                                                                                                                                                                                                                                                                                                                                                                                                                                                                                                                                                                                                                                                                                                                                                                                                                                                                                                                                                                                                                                                                                                                                                                                                                                                                                                                                                                                                                                                                                                                                                                                                                                                                                                                                                                                                                                                                                                                                                                                                                                                                                                                                                                                                                                                                                                                                                                                                                                                                                                                                                                                                                                                                                                                                                                                                                                                                                                                                                                                                                                                                                                                                                                                                                                                                                                                                                                                                                                                                                                                                                                                                                                                                                                                                                                                                                                                                                                                                                                                                                                                                                                                                                                              |
| VC_309_0  | MH837542,MH837543                                                                                                                                                                                                                                                                                                                                                                                                                                                                                                                                                                                                                                                                                                                                                                                                                                                                                                                                                                                                                                                                                                                                                                                                                                                                                                                                                                                                                                                                                                                                                                                                                                                                                                                                                                                                                                                                                                                                                                                                                                                                                                                                                                                                                                                                                                                                                                                                                                                                                                                                                                                                                                                                                                                                                                                                                                                                                                                                                                                                                                                                                                                                                                                                                                                                                                                                                                                                                                                                                                                                                                                                                                                                                                                                                                                                                                                                                                                                                                                                                                                                                                                                                                                                                                                                                                                                                                                                                                                                                                                                                                                                                                                                                                                                                                                                                                                                                                                                                                                                                                                                                                                                                                                                                                                                                                                                                                                                                                                                                                                                                                                                                                                                                                                                                                                                                                                                                                                                                                                                                                                                                                                                                                                                                                                                                                                                                                                                                                                                                                                                                                                                                                                                                                                                                                                                                                                                                                                                                                                                                                                                                                                                                                                                                                                                                                                                                                                                                                                                                                                                                                                                                                                                                                                                                                                                                                                                                                                                                                                                                                                                                                                                                                                                                                                                                                                                                                                                                                                                                                                                                                                                                                                                                                                                                                                                                                                                                                                                                                                                                                                                                                                                                                                                                                                                                                                                                                                                                                                                                                                                                                                                                                                                                                                                                                                                                                                                                                                                                                                                                                                                                                                                                                                                                                              |
| VC_31_0   | AF157835,EU794049,LR794146,LR794147,LR794148,LR794149,LR794150,LR794151,LR794152,LR797923                                                                                                                                                                                                                                                                                                                                                                                                                                                                                                                                                                                                                                                                                                                                                                                                                                                                                                                                                                                                                                                                                                                                                                                                                                                                                                                                                                                                                                                                                                                                                                                                                                                                                                                                                                                                                                                                                                                                                                                                                                                                                                                                                                                                                                                                                                                                                                                                                                                                                                                                                                                                                                                                                                                                                                                                                                                                                                                                                                                                                                                                                                                                                                                                                                                                                                                                                                                                                                                                                                                                                                                                                                                                                                                                                                                                                                                                                                                                                                                                                                                                                                                                                                                                                                                                                                                                                                                                                                                                                                                                                                                                                                                                                                                                                                                                                                                                                                                                                                                                                                                                                                                                                                                                                                                                                                                                                                                                                                                                                                                                                                                                                                                                                                                                                                                                                                                                                                                                                                                                                                                                                                                                                                                                                                                                                                                                                                                                                                                                                                                                                                                                                                                                                                                                                                                                                                                                                                                                                                                                                                                                                                                                                                                                                                                                                                                                                                                                                                                                                                                                                                                                                                                                                                                                                                                                                                                                                                                                                                                                                                                                                                                                                                                                                                                                                                                                                                                                                                                                                                                                                                                                                                                                                                                                                                                                                                                                                                                                                                                                                                                                                                                                                                                                                                                                                                                                                                                                                                                                                                                                                                                                                                                                                                                                                                                                                                                                                                                                                                                                                                                                                                                                                                      |
| VC_310_0  | AF176027,AF176028,AF176029,AF176030,AF176031,AF176032,AF176033,AF176034,AF274751,AF299300,AF299301,AF299302,AF299303,AF299304,AF299305,AF299306,AF299307,AF299308,AF299309,AF299310,AF299311,AF299312,AF299313,AF299314,CP004084,DQ079880,DQ079881,DQ079882,DQ079883,DQ079884,DQ079885,DQ079886,DQ079887,DQ079888,DQ079889,DQ079890,DQ079891,DQ079892,DQ079893,DQ079894,DQ079895,EF380009,EF380010,EF380011,EF380012,EF380013,EF380014,EF380015,EF380016,EF380017,EF380018,EF380019,EF380020,EF380021,EF380022,EF380023,EF380024,EF380025,EF380026,EF380027,EF380028,EF380029,EF380030,EF380031,EF380032,EF380033,EF380034,EF380035,EF380036,EF380037,EF380038,EF380039,EF380040,EF380041,EF380042,EF380043,EF380044,EF380045,EF380046,EF380047,EF380048,EF380049,EF380050,EF380051,EF380052,EF380053,EF380054,EF380055,EF380056,EF380057,EF380058,EF380059,EF380060,EF380061,EF380062,EF380063,EF380064,EF380065,EF380066,EF380067,EF380068,EF380069,EF380070,EF380071,EF380072,EF380073,EF380074,EF380075,EF380076,EF380077,EF380078,EF380079,EF380080,EF380081,EF380082,EF380083,EF380084,EF380085,EF380086,EF380087,EF380088,EF380089,EF380090,EF380091,EF380092,EF380093,EF380094,EF380095,EF380096,EF380097,EF380098,EF380099,EF380100,EF380101,EF380102,EF380103,EF380104,EF380105,EF380106,EF380107,EF380108,EF380109,EF380110,EF380111,EF380112,EF380113,EF380114,EF380115,EF380116,EF380117,EF380118,EF380119,EF380120,EF380121,EF380122,EF380123,EF380124,EF380125,EF380126,EF380127,EF380128,EF380129,EF380130,EF380131,EF380132,EF380133,EF380134,EF380135,EF380136,EF380137,EF380138,EF380139,EF380140,EF380141,EF380142,EF380143,EF380144,EF380145,EF380146,EF380147,EF380148,EF380149,EF380150,EF380151,EF380152,EF380153,EF380154,EF380155,EF380156,EF380157,EF380158,EF380159,EF380160,EF380161,EF380162,EF380163,EF380164,EF380165,EF380166,EF380167,EF380168,EF380169,EF380170,EF380171,EF380172,EF380173,EF380174,EF380175,EF380176,EF380177,EF380178,EF380179,EF380180,EF380181,EF380182,EF380183,EF380184,EF380185,EF380186,EF380187,EF380188,EF380189,EF380190,EF380191,EF380192,EF380193,EF380194,EF380195,EF380196,EF380197,EF380198,EF380199,EF380200,EF380201,EF380202,EF380203,EF380204,EF380205,EF380206,EF380207,EF380208,EF380209,EF380210,EF380211,EF380212,EF380213,EF380214,EF380215,EF380216,EF380217,EF380218,EF380219,EF380220,EF380221,EF380222,EF380223,EF380224,EF380225,EF380226,EF380227,EF380228,EF380229,EF380230,EF380231,EF380232,EF380233,EF380234,EF380235,EF380236,EF380237,EF380238,EF380239,EF380240,EF380241,EF380242,EF380243,EF380244,EF380245,EF380246,EF380247,EF380248,EF380249,EF380250,EF380251,EF380252,EF380253,EF380254,EF380255,EF380256,EF380257,EF380258,EF380259,EF380260,EF380261,EF380262,EF380263,EF380264,EF380265,EF380266,EF380267,EF380268,EF380269,EF380270,EF380271,EF380272,EF380273,EF380274,EF380275,EF380276,EF380277,EF380278,EF380279,EF380280,EF380281,EF380282,EF380283,EF380284,EF380285,EF380286,EF380287,EF380288,EF380289,EF380290,EF380291,EF380292,EF380293,EF380294,EF380295,EF380296,EF380297,EF380298,EF380299,EF380300,EF380301,EF380302,EF380303,EF380304,EF380305,EF380306,EF380307,EF380308,EF380309,EF380310,EF380311,EF380312,EF380313,EF380314,EF380315,EF380316,EF380317,EF380318,EF380319,EF380320,EF380321,EF380322,EF380323,EF380324,EF380325,EF380326,EF380327,EF380328,EF380329,EF380330,EF380331,EF380332,EF380333,EF380334,EF380335,EF380336,EF380337,EF380338,EF380339,EF380340,EF380341,EF380342,EF380343,EF380344,EF380345,EF380346,EF380347,EF380348,EF380349,EF380350,EF380351,EF380352,EF380353,EF380354,EF380355,EF380356,EF380357,EF380358,EF380359,EF380360,EF380361,EF380362,EF380363,EF380364,EF380365,EF380366,EF380367,EF380368,EF380369,EF380370,EF380371,EF380372,EF380373,EF380374,EF380375,EF380376,EF380377,EF380378,EF380379,EF380380,EF380381,EF380382,EF380383,EF380384,EF380385,EF380386,EF380387,EF380388,EF380389,EF380390,EF380391,EF380392,EF380393,EF380394,EF380395,EF380396,EF380397,EF380398,EF380399,EF380400,EF380401,EF380402,EF380403,EF380404,EF380405,EF380406,EF380407,EF380408,EF380409,EF380410,EF380411,EF380412,EF380413,EF380414,EF380415,EF380416,EF380417,EF380418,EF380419,EF380420,EF380421,EF380422,EF380423,EF380424,EF380425,EF380426,EF380427,EF380428,EF380429,EF380430,EF380431,EF380432,EF380433,EF380434,EF380435,EF380436,EF380437,EF380438,EF380439,EF380440,EF380441,EF380442,EF380443,EF380444,EF380445,EF380446,EF380447,EF380448,EF380449,EF380450,EF380451,EF380452,EF380453,EF380454,EF380455,EF380456,EF380457,EF380458,EF380459,EF380460,EF380461,EF380462,EF380463,EF380464,EF380465,EF380466,EF380467,EF380468,EF380469,EF380470,EF380471,EF380472,EF380473,EF380474,EF380475,EF380476,EF380477,EF380478,EF380479,EF380480,EF380481,EF380482,EF380483,EF380484,EF380485,EF380486,EF380487,EF380488,EF380489,EF380490,EF380491,EF380492,EF380493,EF380494,EF380495,EF380496,EF380497,EF380498,EF380499,EF380500,EF380501,EF380502,EF380503,EF380504,EF380505,EF380506,EF380507,EF380508,EF380509,EF380510,EF380511,EF380512,EF380513,EF380514,EF380515,EF380516,EF380517,EF380518,EF380519,EF380520,EF380521,EF380522,EF380523,EF380524,EF380525,EF380526,EF380527,EF380528,EF380529,EF380530,EF380531,EF380532,EF380533,EF380534,EF380535,EF380536,EF380537,EF380538,EF380539,EF380540,EF380541,EF380542,EF380543,EF380544,EF380545,EF380546,EF380547,EF380548,EF380549,EF380550,EF380551,EF380552,EF380553,EF380554,EF380555,EF380556,EF380557,EF380558,EF380559,EF380560,EF380561,EF380562,EF380563,EF380564,EF380565,EF380566,EF380567,EF380568,EF380569,EF380570,EF380571,EF380572,EF380573,EF380574,EF380575,EF380576,EF380577,EF380578,EF380579,EF380580,EF380581,EF380582,EF380583,EF380584,EF380585,EF380586,EF380587,EF380588,EF380589,EF380590,EF380591,EF380592,EF380593,EF380594,EF380595,EF380596,EF380597,EF380598,EF380599,EF380600,EF380601,EF380602,EF380603,EF380604,EF380605,EF380606,EF380607,EF380608,EF380609,EF380610,EF380611,EF380612,EF380613,EF380614,EF380615,EF380616,EF380617,EF380618,EF380619,EF380620,EF380621,EF380622,EF380623,EF380624,EF380625,EF380626,EF380627,EF380628,EF380629,EF380630,EF380631,EF380632,EF380633,EF380634,EF380635,EF380636,EF380637,EF380638,EF380639,EF380640,EF380641,EF380642,EF380643,EF380644,EF380645,EF380646,EF380647,EF380648,EF380649,EF380650,EF380651,EF380652,EF380653,EF380654,EF380655,EF380656,EF380657,EF380658,EF380659,EF380660,EF380661,EF380662,EF380663,EF380664,EF380665,EF380666,EF380667,EF380668,EF380669,EF380670,EF380671,EF380672,EF380673,EF380674,EF380675,EF380676,EF380677,EF380678,EF380679,EF380680,EF380681,EF380682,EF380683,EF380684,EF380685,EF380686,EF380687,EF380688,EF380689,EF380690,EF380691,EF380692,EF380693,EF380694,EF380695,EF380696,EF380697,EF380698,EF380699,EF380700,EF380701,EF380702,EF380703,EF380704,EF380705,EF380706,EF380707,EF380708,EF380709,EF380710,EF380711,EF380712,EF380713,EF380714,EF380715,EF380716,EF380717,EF380718,EF380719,EF380720,EF380721,EF380722,EF380723,EF380724,EF380725,EF380726,EF380727,EF380728,EF380729,EF380730,EF380731,EF380732,EF380733,EF380734,EF380735,EF380736,EF380737,EF380738,EF380739,EF380740,EF380741,EF380742,EF380743,EF380744,EF380745,EF380746,EF380747,EF380748,EF380749,EF380750,EF380751,EF380752,EF380753,EF380754,EF380755,EF380756,EF380757,EF380758,EF380759,EF380760,EF380761,EF380762,EF380763,EF380764,EF380765,EF380766,EF380767,EF380768,EF380769,EF380770,EF380771,EF380772,EF380773,EF380774,EF380775,EF380776,EF380777,EF380778,EF380779,EF380780,EF380781,EF380782,EF380783,EF380784,EF380785,EF380786,EF380787,EF380788,EF380789,EF380790,EF380791,EF380792,EF380793,EF380794,EF380795,EF380796,EF380797,EF380798,EF380799,EF380800,EF380801,EF380802,EF380803,EF380804,EF380805,EF380806,EF380807,EF380808,EF380809,EF380810,EF380811,EF380812,EF380813,EF380814,EF380815,EF380816,EF380817,EF380818,EF380819,EF380820,EF380821,EF380822,EF380823,EF380824,EF380825,EF380826,EF380827,EF380828,EF380829,EF380830,EF380831,EF380832,EF380833,EF380834,EF380835,EF380836,EF380837,EF380838,EF380839,EF380840,EF380841,EF380842,EF380843,EF380844,EF380845,EF380846,EF380847,EF380848,EF380849,EF380850,EF380851,EF380852,EF380853,EF380854,EF380855,EF380856,EF380857,EF380858,EF380859,EF380860,EF380861,EF380862,EF380863,EF380864,EF380865,EF380866,EF380867,EF380868,EF380869,EF380870,EF380871,EF380872,EF380873,EF380874,EF380875,EF380876,EF380877,EF380878,EF380879,EF380880,EF380881,EF380882,EF380883,EF380884,EF380885,EF380886,EF380887,EF380888,EF380889,EF380890,EF380891,EF380892,EF380893,EF380894,EF380895,EF380896,EF380897,EF380898,EF380899,EF380900,EF380901,EF380902,EF380903,EF380904,EF380905,EF380906,EF380907,EF380908,EF380909,EF380910,EF380911,EF380912,EF380913,EF380914,EF380915,EF380916,EF380917,EF380918,EF380919,EF380920,EF380921,EF380922,EF380923,EF380924,EF380925,EF380926,EF380927,EF380928,EF380929,EF380930,EF380931,EF380932,EF380933,EF380934,EF380935,EF380936,EF380937,EF380938,EF380939,EF380940,EF380941,EF380942,EF380943,EF380944,EF380945,EF380946,EF380947,EF380948,EF380949,EF380950,EF380951,EF380952,EF380953,EF380954,EF380955,EF380956,EF380957,EF380958,EF380959,EF380960,EF380961,EF380962,EF380963,EF380964,EF380965,EF380966,EF380967,EF380968,EF380969,EF380970,EF380971,EF380972,EF380973,EF380974,EF380975,EF380976,EF380977,EF380978,EF380979,EF380980,EF380981,EF380982,EF380983,EF380984,EF380985,EF380986,EF380987,EF380988,EF380989,EF380990,EF380991,EF380992,EF380993,EF380994,EF380995,EF380996,EF380997,EF380998,EF380999,EF381000,EF381001,EF381002,EF381003,EF381004,EF381005,EF381006,EF381007,EF381008,EF381009,EF381010,EF381011,EF381012,EF381013,EF381014,EF381015,EF381016,EF381017,EF381018,EF381019,EF381020,EF381021,EF381022,EF381023,EF381024,EF381025,EF381026,EF381027,EF381028,EF381029,EF381030,EF381031,EF381032,EF381033,EF381034,EF381035,EF381036,EF381037,EF381038,EF381039,EF381040,EF381041,EF381042,EF381043,EF381044,EF381045,EF381046,EF381047,EF381048,EF381049,EF381050,EF381051,EF381052,EF381053,EF381054,EF381055,EF381056,EF381057,EF381058,EF381059,EF381060,EF381061,EF381062 |



|           |                                                                                                                                                          |
|-----------|----------------------------------------------------------------------------------------------------------------------------------------------------------|
| VC_322_0  | AF227250,EFI08464,EFI08465,EF204939,EF204940,FJ483837,FJ483838,FJ483839,JQ966307,LT898437,MK213795,MT830620                                              |
| VC_323_0  | MZ326866,MZ611865,ON711490                                                                                                                               |
| VC_324_0  | KY065466,KY065468                                                                                                                                        |
| VC_33_0   | KY271395,KY271396,MK448231,MK448233,MK448235,MK714353,OK490410,OK490415,OK490416                                                                         |
| VC_33_1   | OK499971                                                                                                                                                 |
| VC_33_2   | HQ201308                                                                                                                                                 |
| VC_331_0  | MK448821,MK448822                                                                                                                                        |
| VC_331_1  | MK448757,MK448758,MK448759,MK448939,OL774872                                                                                                             |
| VC_331_2  | MK448735,MK448743,MK448893,MK448903,MK448915,MK448919,MK448921                                                                                           |
| VC_335_0  | MH513971,ON970586                                                                                                                                        |
| VC_335_1  | JN398369,MN617845                                                                                                                                        |
| VC_335_10 | MH744414,MK359331,MN119379                                                                                                                               |
| VC_335_11 | MH001458                                                                                                                                                 |
| VC_335_12 | MN813700                                                                                                                                                 |
| VC_335_13 | EU744249,EU744252                                                                                                                                        |
| VC_335_14 | GU247132,KT818595,MT889384                                                                                                                               |
| VC_335_15 | KJ174156                                                                                                                                                 |
| VC_335_16 | MK310141,MK524523                                                                                                                                        |
| VC_335_17 | KC701493                                                                                                                                                 |
| VC_335_18 | OL549190                                                                                                                                                 |
| VC_335_19 | JN020140,MH338238,MK967387                                                                                                                               |
| VC_335_2  | JF937099                                                                                                                                                 |
| VC_335_20 | MN585970                                                                                                                                                 |
| VC_335_21 | EU744248,KX522649,KX522943,KX574454,MK524497                                                                                                             |
| VC_335_22 | MK524499                                                                                                                                                 |
| VC_335_23 | JF937103,KC661273,KT259047,MC920060,MC925351,MH020244,MH450113,MH450130,MH576959,MH576971,MH576974,MK359299,MK820638,MT639654,MW507123,MW712732,ON970627 |
| VC_335_24 | JF957057,MH230876,MN585976                                                                                                                               |
| VC_335_25 | MZ648034                                                                                                                                                 |
| VC_335_26 | MG944220                                                                                                                                                 |
| VC_335_27 | KX683876,KX702320,MC099951,MH000606,MH651180,MT952847                                                                                                    |
| VC_335_28 | MH536816,MH632118                                                                                                                                        |
| VC_335_29 | KX369584                                                                                                                                                 |
| VC_335_3  | KF493880                                                                                                                                                 |
| VC_335_30 | KP027196,KP027203,MW862983                                                                                                                               |
| VC_335_31 | MF919508,MN585997                                                                                                                                        |
| VC_335_32 | ON208829                                                                                                                                                 |
| VC_335_33 | KF560331,MK112532,MK359316,OM203162                                                                                                                      |
| VC_335_34 | AF271693,MZ355726                                                                                                                                        |
| VC_335_35 | KP027205,MH697581                                                                                                                                        |
| VC_335_36 | JF937100,MK112530                                                                                                                                        |
| VC_335_37 | JN699016,JX307705,KT363731,MN119377                                                                                                                      |
| VC_335_38 | KX712238                                                                                                                                                 |
| VC_335_39 | MK524525                                                                                                                                                 |
| VC_335_4  | KX369586                                                                                                                                                 |
| VC_335_40 | MH576975,MK967401                                                                                                                                        |
| VC_335_41 | JN699000,MC962370                                                                                                                                        |
| VC_335_42 | KY213952,MK112540                                                                                                                                        |
| VC_335_43 | AP018477,AP018478,KF416340,MH632117                                                                                                                      |
| VC_335_44 | EU744251,JN660814,MH669011                                                                                                                               |
| VC_335_45 | KJ409696,KT326768,MK494116,OK040791                                                                                                                      |
| VC_335_46 | MK814754                                                                                                                                                 |
| VC_335_47 | MW435858                                                                                                                                                 |
| VC_335_48 | ON677304                                                                                                                                                 |
| VC_335_49 | EU826470,JN572689,JQ698665,JQ809703,KF024724,KF279415,KF279416,KM597531,KR080201,MF668283,MK359312,MK524506,MK524531,MN428054,MN586000,MT657342,MZ322004 |
| VC_335_5  | AY500152,JF937108,JF937110,KJ194585,KT626047,MC872833,MC925344,MC962372,MK359354,MN585999,MT310897                                                       |
| VC_335_50 | MH371110,MN369760                                                                                                                                        |
| VC_335_51 | MK061415,MN585985,MT776812                                                                                                                               |
| VC_335_52 | MG812486,MG812489,MG812495,MC872836                                                                                                                      |
| VC_335_53 | KJ690250,MN585991                                                                                                                                        |
| VC_335_54 | JN153085,MH230878,MH697575,MN062710,MN234212                                                                                                             |
| VC_335_55 | MK305893,MZ355722                                                                                                                                        |
| VC_335_56 | KT388014,KX550443,MH020236,MH399782,MH590595,MK359300,MK359304                                                                                           |
| VC_335_57 | KY224001                                                                                                                                                 |
| VC_335_58 | ON970624                                                                                                                                                 |
| VC_335_59 | MT771340                                                                                                                                                 |
| VC_335_6  | MN444869                                                                                                                                                 |
| VC_335_60 | JN687951,MH338239                                                                                                                                        |
| VC_335_61 | JN153086,JN698998,MC925340,MC925342,MH450133,MH479919,MK310142,MT639644                                                                                  |
| VC_335_62 | OL455898,OM105884,OP021677                                                                                                                               |
| VC_335_7  | KR997929,KR997934,MC944221                                                                                                                               |
| VC_335_8  | KF024726,KP027204                                                                                                                                        |
| VC_335_9  | AY500153,KT438500                                                                                                                                        |



|           |                                                                                                                                                                                                                                                                                                                                                                                                                                                                                              |
|-----------|----------------------------------------------------------------------------------------------------------------------------------------------------------------------------------------------------------------------------------------------------------------------------------------------------------------------------------------------------------------------------------------------------------------------------------------------------------------------------------------------|
| VC_336_0  | KJ608189                                                                                                                                                                                                                                                                                                                                                                                                                                                                                     |
| VC_337_0  | MW202895                                                                                                                                                                                                                                                                                                                                                                                                                                                                                     |
| VC_338_0  | AF306496,MH992158,MH992160,MH992177,MH992178,MH992189,MH992191,MH992194,MH992197,MH992207,MH992218,MW202535                                                                                                                                                                                                                                                                                                                                                                                  |
| VC_339_0  | EU710883,FQ482083,HQ728263,MG589384,MH426725,MK759884,MK770412,MN604407,OK483342,OM522317,ON706965                                                                                                                                                                                                                                                                                                                                                                                           |
| VC_34_0   | MH443100                                                                                                                                                                                                                                                                                                                                                                                                                                                                                     |
| VC_340_0  | MG646672,MH586731                                                                                                                                                                                                                                                                                                                                                                                                                                                                            |
| VC_340_1  | AF320576,JF461087,JX181822,KP143762,KY626162,MF370225,MG251391,MG251392,MG969405,MG969406,MK965969,MK965970,MW006474,MW006475,MW006482,MZ327261,MZ327262                                                                                                                                                                                                                                                                                                                                     |
| VC_340_10 | MN994498                                                                                                                                                                                                                                                                                                                                                                                                                                                                                     |
| VC_340_11 | KP010413,MG646669,MG646670,MG646671,MN227145,MN481367,MN655999,MW311372,MW321605,MW362867,MZ150758,OL474141,OL800606,OL825705,ON239128                                                                                                                                                                                                                                                                                                                                                       |
| VC_340_12 | MG065664,OK272472                                                                                                                                                                                                                                                                                                                                                                                                                                                                            |
| VC_340_13 | KM657822                                                                                                                                                                                                                                                                                                                                                                                                                                                                                     |
| VC_340_14 | MG969404                                                                                                                                                                                                                                                                                                                                                                                                                                                                                     |
| VC_340_15 | GU169904                                                                                                                                                                                                                                                                                                                                                                                                                                                                                     |
| VC_340_16 | KF055347,KX405003,MT409176,MW423797                                                                                                                                                                                                                                                                                                                                                                                                                                                          |
| VC_340_17 | KM092515,MT322327,OK040806,OK040807                                                                                                                                                                                                                                                                                                                                                                                                                                                          |
| VC_340_18 | JX560968,MK524176,MN882542,MT833282,MT887289,MW296865,ON540300                                                                                                                                                                                                                                                                                                                                                                                                                               |
| VC_340_19 | ON868915                                                                                                                                                                                                                                                                                                                                                                                                                                                                                     |
| VC_340_2  | MN850631,MN850637                                                                                                                                                                                                                                                                                                                                                                                                                                                                            |
| VC_340_20 | LC739530,LC739531,LC739532,ON210138                                                                                                                                                                                                                                                                                                                                                                                                                                                          |
| VC_340_21 | MH051914                                                                                                                                                                                                                                                                                                                                                                                                                                                                                     |
| VC_340_22 | MZ311863,OM386661,OM386663,OM386664,OM386665                                                                                                                                                                                                                                                                                                                                                                                                                                                 |
| VC_340_3  | KX377933,LR880803,MK962758,MN850564,MN850566,MN850577,MN850580,MN850585,MN850603,MN850605,MN850610,MN850611,MN850614,MN850619,MN850633,MN850635,MN850636,MN850639,MN850644,MN850647,MZ501086,OK272490,OM630585,OX016465                                                                                                                                                                                                                                                                      |
| VC_340_4  | JN225449,KR014248                                                                                                                                                                                                                                                                                                                                                                                                                                                                            |
| VC_340_5  | MN994499                                                                                                                                                                                                                                                                                                                                                                                                                                                                                     |
| VC_340_6  | LR597658,MZ726791,MZ726792                                                                                                                                                                                                                                                                                                                                                                                                                                                                   |
| VC_340_7  | EU877232,KP869100,KP869106,KP869109,KP869110,KP869113,KT184313,KT184314,KT184315,KT184316,LC519489,LR699048,MH571750,MK482688,MK482689,MK482690,MT446388,MW481326                                                                                                                                                                                                                                                                                                                            |
| VC_340_8  | LC473039,MN994503                                                                                                                                                                                                                                                                                                                                                                                                                                                                            |
| VC_340_9  | LR597663                                                                                                                                                                                                                                                                                                                                                                                                                                                                                     |
| VC_341_0  | KM236239,KT001916,KT363872,KT454805,KT454806,KY654690,MF158040,MF158041,MF158043,MF158044,MF327003,MF327004,MF327005,MH791400,MH791413,MH920362,MK562502,MK562504,MK562505,MN342151,MN850587,OK539913,OM953433,ON528729,ON528730,ON528731,ON528732                                                                                                                                                                                                                                           |
| VC_342_0  | MK290737,MK290738,MN270891,MN270892                                                                                                                                                                                                                                                                                                                                                                                                                                                          |
| VC_343_0  | MW749004,MW749010,OK283618                                                                                                                                                                                                                                                                                                                                                                                                                                                                   |
| VC_346_0  | MK449000                                                                                                                                                                                                                                                                                                                                                                                                                                                                                     |
| VC_347_0  | MK448804,MK448805,MK448807,MK448808,MK448815,MK448891                                                                                                                                                                                                                                                                                                                                                                                                                                        |
| VC_348_0  | MT980836,MT980837,MT980838,MT980839,MT980840,MT980841                                                                                                                                                                                                                                                                                                                                                                                                                                        |
| VC_35_0   | AF125520,AP000363,AP000422,AP004402,AP005153,AP005154,AP012529,AP012531,AP012532,AP012535,EU311208,HM208303,KJ909655,KP682372,KP682373,KP682375,KP682376,KP682377,KP682378,KP682379,KP682380,KP682382,KP682383,KP682384,KP682385,KP682386,KP682387,KP682388,KP682389,KP682390,KP682391,KP682392,KU238068,KU238069,KU238070                                                                                                                                                                   |
| VC_350_0  | MW462221,MZ047271                                                                                                                                                                                                                                                                                                                                                                                                                                                                            |
| VC_351_0  | AF323671,LT985572,LT985581,LT985584,LT985586,LT985587,LT985593,LT993227,LT996080                                                                                                                                                                                                                                                                                                                                                                                                             |
| VC_352_0  | AF338467,AP013538,AP013539,AY939843,EF372997,GU071093,GU071100,GU071102,GU071104,GU071107,GU943054,HM559717,HQ316584,HQ317388,HQ317389,HQ332137,HQ332140,HQ337022,HQ633062,HQ634152,HQ634188,KC310802,KC310803,KC310804,KC310805,KC310806,MH540083,MK01666                                                                                                                                                                                                                                   |
| VC_353_0  | 2,MT424636,MW015080,MZ803112                                                                                                                                                                                                                                                                                                                                                                                                                                                                 |
| VC_354_0  | AF398666,MW202489,OK085710                                                                                                                                                                                                                                                                                                                                                                                                                                                                   |
| VC_355_0  | MN988526,MN988556                                                                                                                                                                                                                                                                                                                                                                                                                                                                            |
| VC_356_0  | AF399011,AP019418,JX233784,KU521356,LC727695,LC727696,LC727699,LC727701,MF805716,MN563784,MN871480,MN871489,MT133560,MT995926,MT995927,MT995928,MW057919,MZ444140,ON631220,OP310983,OP310984                                                                                                                                                                                                                                                                                                 |
| VC_356_1  | MK599315,MN103543,OU343167                                                                                                                                                                                                                                                                                                                                                                                                                                                                   |
| VC_356_2  | MF063068                                                                                                                                                                                                                                                                                                                                                                                                                                                                                     |
| VC_356_3  | MK552327                                                                                                                                                                                                                                                                                                                                                                                                                                                                                     |
| VC_356_4  | EU197055                                                                                                                                                                                                                                                                                                                                                                                                                                                                                     |
| VC_356_5  | MF042360                                                                                                                                                                                                                                                                                                                                                                                                                                                                                     |
| VC_356_6  | HQ630627                                                                                                                                                                                                                                                                                                                                                                                                                                                                                     |
| VC_357_0  | AP017924,AP017925                                                                                                                                                                                                                                                                                                                                                                                                                                                                            |
| VC_357_1  | LC667451                                                                                                                                                                                                                                                                                                                                                                                                                                                                                     |
| VC_358_0  | MK308674,MK308675,MK308676,MK308677                                                                                                                                                                                                                                                                                                                                                                                                                                                          |
| VC_358_1  | MT811961,OM319461                                                                                                                                                                                                                                                                                                                                                                                                                                                                            |
| VC_358_2  | OV032902                                                                                                                                                                                                                                                                                                                                                                                                                                                                                     |
| VC_358_3  | MH595538                                                                                                                                                                                                                                                                                                                                                                                                                                                                                     |
| VC_359_0  | LR881104,MN871444,MN871445                                                                                                                                                                                                                                                                                                                                                                                                                                                                   |
| VC_36_0   | HQ201307,JQ182729,MH178096,MN688132                                                                                                                                                                                                                                                                                                                                                                                                                                                          |
| VC_360_0  | AJ344259,AJ414696,AJ748296,AJ875026,FM164764,KP282675,KX712143,KY744228,KY744229,KY744230,KY744231,KY744232,KY744233,KY744234,KY744235,MK064565,MN876841,MN876842,MN876843,OM401712,OM401713,OM401714                                                                                                                                                                                                                                                                                        |
| VC_361_0  | AF440571,AM087120,AM087121,AM087122,AM087123,EU545650,KX467643                                                                                                                                                                                                                                                                                                                                                                                                                               |
| VC_362_0  | AJ854042,MK064564                                                                                                                                                                                                                                                                                                                                                                                                                                                                            |
| VC_363_0  | AM419438,HQ332141,MW344765                                                                                                                                                                                                                                                                                                                                                                                                                                                                   |
| VC_364_0  | AF440695,MK002701,MK450543                                                                                                                                                                                                                                                                                                                                                                                                                                                                   |
| VC_365_0  | AF447491,AY453853,CP000625,OK095358,OM892879,OP293079                                                                                                                                                                                                                                                                                                                                                                                                                                        |
| VC_366_0  | MN512538,MN812722,MT227924,OP125534                                                                                                                                                                                                                                                                                                                                                                                                                                                          |
| VC_367_0  | MT121967,MW651859                                                                                                                                                                                                                                                                                                                                                                                                                                                                            |
| VC_368_0  | ON170062,ON170209,ON170231,ON170302,ON170328                                                                                                                                                                                                                                                                                                                                                                                                                                                 |
| VC_369_0  | HQ634187,MK105819                                                                                                                                                                                                                                                                                                                                                                                                                                                                            |
| VC_37_0   | AY374448,CP038007,CP072507,KY271402                                                                                                                                                                                                                                                                                                                                                                                                                                                          |
| VC_370_0  | MT740734,ON170024,ON170027,ON170031,ON170052,ON170057,ON170058,ON170068,ON170071,ON170075,ON170077,ON170079,ON170129,ON170133,ON170134,ON170136,ON170150,ON170172,ON170175,ON170179,ON170181,ON170182,ON170185,ON170187,ON170208,ON170214,ON170228,ON170229,ON170232,ON170234,ON170236,ON170238,ON170240,ON170242,ON170254,ON170257,ON170262,ON170264,ON170265,ON170267,ON170275,ON170279,ON170286,ON170287,ON170303,ON170317,ON170323,ON170324,ON170326,ON170327,ON170343,ON170355,ON170359 |
| VC_371_0  | ON170149,ON170171,ON170322                                                                                                                                                                                                                                                                                                                                                                                                                                                                   |
| VC_372_0  | JN585957,MF612073,MH426726,MK618715,MT251347,MT251348,MW722080                                                                                                                                                                                                                                                                                                                                                                                                                               |



AF454431,AY751298,DQ079896,DQ079897,DQ079899,DQ079900,DQ079901,DQ079902,DQ079903,DQ079904,DQ079906,DQ079908,DQ079909,GQ153920,GQ153922,GQ153923,JF719729,JF719730,JF719731,KX266300,KX266301,KX266302,KX266303,KX266304,KX266305,KX266306,KX266307,KX266308,KX266309,KX266310,KX266311,KX266312,KX266313,KX266314,KX266315,KX266316,KX266317,KX266318,KX266319,KX266320,KX266321,KX266322,KX266323,KX266324,KX266325,KX266326,KX266327,KX266328,KX266329,KX266330,KX266331,KX266332,KX266333,KX266334,KX266335,KX266336,KX266337,KX266338,KX266339,KX266340,KX266341,KX266342,KX266343,KX266344,KX266345,KX266346,KX266347,KX266348,KX266349,KX266350,KX266351,KX266352,KX266353,KX266354,KX266355,KX266356,KX266357,KX266358,KX266359,KX266360,KX266361,KX266362,KX266363,KX266364,KX266365,KX266366,KX266367,KX266368,KX266369,KX266370,KX266371,KX266372,KX266373,KX266374,KX266375,KX266376,KX266377,KX266378,KX266379,KX266380,KX266381,KX266382,KX266383,KX266384,KX266385,KX266386,KX266387,KX266388,KX266389,KX266390,KX266391,KX266392,KX266393,KX266394,KX266395,KX266396,KX266397,KX266398,KX266399,KX266400,KX266401,KX266402,KX266403,KX266404,KX266405,KX266406,KX266407,KX266408,KX266409,KX266410,KX266411,KX266412,KX266413,KX266414,KX266415,KX266416,KX266417,KX266418,KX266419,KX266420,KX266421,KX266422,KX266423,KX266424,KX266425,KX266426,KX266427,KX266428,KX266429,KX266430,KX266431,KX266432,KX266433,KX266434,KX266435,KX266436,KX266437,KX266438,KX266439,KX266440,KX266441,KX266442,KX266443,KX266444,KX266445,KX266446,KX266447,KX266448,KX266449,KX266450,KX266451,KX266452,KX266453,KX266454,KX266455,KX266456,KX266457,KX266458,KX266459,KX266460,KX266461,KX266462,KX266463,KX266464,KX266465,KX266466,KX266467,KX266468,KX266469,KX266470,KX266471,KX266472,KX266473,KX266474,KX266475,KX266476,KX266477,KX266478,KX266479,KX266480,KX266481,KX266482,KX266483,KX266484,KX266485,KX266486,KX266487,KX266488,KX266489,KX266490,KX266491,KX266492,KX266493,KX266494,KX266495,KX266496,KX266497,KX266498,KX266499,KX266500,KX266501,KX266502,KX266503,KX266504,KX266505,KX266506,KX266507,KX266508,KX266509,KX266510,KX266511,KX266512,KX266513,KX266514,KX266515,KX266516,KX266517,KX266518,KX266519,KX266520,KX266521,KX266522,KX266523,KX266524,KX266525,KX266526,KX266527,KX266528,KX266529,KX266530,KX266531,KX266532,KX266533,KX266534,KX266535,KX266536,KX266537,KX266538,KX266539,KX266540,KX266541,KX266542,KX266543,KX266544,KX266545,KX266546,KX266547,KX266548,KX266549,KX266550,KX266551,KX266552,KX266553,KX266554,KX266555,KX266556,KX266557,KX266558,KX266559,KX266560,KX266561,KX266562,KX266563,KX266564,KX266565,KX266566,KX266567,KX266568,KX266569,KX266570,KX266571,KX266572,KX266573,KX266574,KX266575,KX266576,KX266577,KX266578,KX266579,KX266580,KX266581,KX266582,KX266583,KX266584,KX266585,KX266586,KX266587,KX266588,KX266589,KX266590,KX266591,KX266592,KX266593,KX266594,KX266595,KX266596,KX266597,KX266598,KX266599,KX266600,KX266601,KX266602,KX266603,KX266604,KX266605,KX266606,KX266607,KX266608,KX266609,KX266610,KX266611,KX266612,KX266613,KX266614,KX266615,KX266616,KX266617,KX266618,KX266619,KX266620,KX266621,KX266622,KX266623,KX266624,KX266625,KX266626,KX266627,KX266628,KX266629,KX266630,KX266631,KX266632,KX266633,KX266634,KX266635,KX266636,KX266637,MC563770

VC\_373\_0

VC\_375\_0

VC\_376\_0

VC\_377\_0

VC\_38\_0

VC\_38\_1

VC\_380\_0

VC\_384\_0

VC\_384\_1

VC\_384\_10

VC\_384\_11

VC\_384\_12

VC\_384\_13

VC\_384\_14

VC\_384\_15

VC\_384\_16

VC\_384\_17

VC\_384\_18

VC\_384\_19

VC\_384\_2

VC\_384\_20

VC\_384\_21

VC\_384\_3

VC\_384\_4

VC\_384\_5

VC\_384\_6

VC\_384\_7

VC\_384\_8

VC\_384\_9

VC\_385\_0

VC\_385\_1

VC\_385\_2

VC\_385\_3

VC\_385\_4

VC\_386\_0

VC\_387\_0

VC\_388\_0

VC\_389\_0

VC\_392\_0

VC\_393\_0

VC\_394\_0

VC\_396\_0

VC\_398\_0

VC\_399\_0

VC\_4\_0

VC\_40\_0

VC\_40\_1

VC\_400\_0

VC\_401\_0

VC\_402\_0

VC\_403\_0



|           |                                                                                                                                                                                                                                                                                                                                                                                                                                                                                                                                                                                                                                                                                                                                                                                                                                                                                                                                                                                                                                                                                                                                                                  |
|-----------|------------------------------------------------------------------------------------------------------------------------------------------------------------------------------------------------------------------------------------------------------------------------------------------------------------------------------------------------------------------------------------------------------------------------------------------------------------------------------------------------------------------------------------------------------------------------------------------------------------------------------------------------------------------------------------------------------------------------------------------------------------------------------------------------------------------------------------------------------------------------------------------------------------------------------------------------------------------------------------------------------------------------------------------------------------------------------------------------------------------------------------------------------------------|
| VC_405_0  | AY247822,AY264774,AY264775,AY264776,AY264777,AY264778,EU734174,FR667955,GU071091,JQ957925,JQ965700,JQ965701,JQ965703,JX000007,JX872508,KM242061,KU927499,LC730325,LR745706,LR745707,LR745708,LR745709,LR745710,MG488277,MG832642,MG833025,MG966531,MH382198,MH71098,MH71099,MH779619,MK310182,MK542821,MN026740,MN098329,MN481365,MN481366,MT350293,MT543041,MT681669,MW074885,MW883060,MZ220766,MZ318361,MZ318362,MZ318363,MZ375233,MZ375234,MZ375235,MZ375236,MZ375237,MZ375238,MZ375239,MZ375240,MZ375241,MZ375242,MZ375243,MZ375244,MZ375245,MZ375246,MZ375247,MZ375248,MZ375249,MZ375250,MZ375251,MZ375252,MZ375253,MZ375254,MZ375255,MZ375256,MZ375257,MZ375258,MZ375259,MZ375260,MZ375261,MZ375262,MZ375264,MZ375265,MZ375266,MZ375267,MZ375268,MZ375269,MZ375270,MZ375271,MZ375272,MZ375273,MZ375274,MZ375275,MZ375276,MZ375277,MZ375278,MZ375279,MZ375280,MZ375281,MZ375282,MZ375283,MZ375284,MZ375285,MZ375286,MZ375287,MZ375288,MZ375289,MZ375290,MZ375291,MZ375292,MZ375293,MZ375294,MZ501078,MZ501081,MZ833439,OK042080,OL964739,OL964740,OL964741,OL964748,OL964749,OL964750,OM630586,ONS28715,ONS28716,ONS28717,ONS28719,ONS68193,OP331230,V01146 |
| VC_406_0  | MH059639,MH460459,MN013082,MN013085,MN812693,MT822288,ON287378                                                                                                                                                                                                                                                                                                                                                                                                                                                                                                                                                                                                                                                                                                                                                                                                                                                                                                                                                                                                                                                                                                   |
| VC_407_0  | MH370477,MT465573                                                                                                                                                                                                                                                                                                                                                                                                                                                                                                                                                                                                                                                                                                                                                                                                                                                                                                                                                                                                                                                                                                                                                |
| VC_408_0  | MN184885,MT822284,MT822285,MT822286,MT822287                                                                                                                                                                                                                                                                                                                                                                                                                                                                                                                                                                                                                                                                                                                                                                                                                                                                                                                                                                                                                                                                                                                     |
| VC_409_0  | MW057854,MW358928                                                                                                                                                                                                                                                                                                                                                                                                                                                                                                                                                                                                                                                                                                                                                                                                                                                                                                                                                                                                                                                                                                                                                |
| VC_41_0   | AB231700,KF356199,OP394178                                                                                                                                                                                                                                                                                                                                                                                                                                                                                                                                                                                                                                                                                                                                                                                                                                                                                                                                                                                                                                                                                                                                       |
| VC_411_0  | KP087939,KP087945,KT264811,MC945164,MC945682,MC945837,MH572269,MH572314,MH572315,MH572316,MH572317,MH572318,MH572319,MH572320,MH572321,MH572325,MH572326,MH572328,MH572329,MH572336,MH572351,MH572394,MH572395,MH572396,MH572397,MH572404,MH572419,MH572431,MH572439,MH572441,MH572443,MH572445,MH572446,MH572451,MH572473,MH572487,MH572492,MH572493,MH572494,MH572503,MH572510,MH572511,MH992195,MH992211,MK249143,MK249151,MK249223,MK249231                                                                                                                                                                                                                                                                                                                                                                                                                                                                                                                                                                                                                                                                                                                  |
| VC_412_0  | MH572279,MH572300,MH572301,MH572302,MH572303,MH572305,MH572306,MH572307,MH572308,MH572309,MH572310,MH572311,MH572312,MH572313,MH572345,MH572392,MH572393,MH572406,MH572435,MH572436,MH572437,MH572469,MH572480,MH572508,MH572509                                                                                                                                                                                                                                                                                                                                                                                                                                                                                                                                                                                                                                                                                                                                                                                                                                                                                                                                 |
| VC_414_0  | MH572340                                                                                                                                                                                                                                                                                                                                                                                                                                                                                                                                                                                                                                                                                                                                                                                                                                                                                                                                                                                                                                                                                                                                                         |
| VC_415_0  | MH572479                                                                                                                                                                                                                                                                                                                                                                                                                                                                                                                                                                                                                                                                                                                                                                                                                                                                                                                                                                                                                                                                                                                                                         |
| VC_416_0  | MH572512                                                                                                                                                                                                                                                                                                                                                                                                                                                                                                                                                                                                                                                                                                                                                                                                                                                                                                                                                                                                                                                                                                                                                         |
| VC_417_0  | KC131023,KC131025,MH572294,MH572295,MH572296,MH572384,MH572385,MH572386,MH572387,MH572388,MH572389,MH572390,MH572391,MH572430,MH572470,MH572471,MH572472,MH572505,MH572506,MH572507                                                                                                                                                                                                                                                                                                                                                                                                                                                                                                                                                                                                                                                                                                                                                                                                                                                                                                                                                                              |
| VC_419_0  | KP790011,KU998237,KU998238,KY471268,KY471269,MH651189,MH697580,MN010758,MT553344,MW132713,ON260826                                                                                                                                                                                                                                                                                                                                                                                                                                                                                                                                                                                                                                                                                                                                                                                                                                                                                                                                                                                                                                                               |
| VC_42_0   | LC567830,LC567838,LC567842,LC616079,ON416862                                                                                                                                                                                                                                                                                                                                                                                                                                                                                                                                                                                                                                                                                                                                                                                                                                                                                                                                                                                                                                                                                                                     |
| VC_420_0  | AJ278322,MG324353,MG324354                                                                                                                                                                                                                                                                                                                                                                                                                                                                                                                                                                                                                                                                                                                                                                                                                                                                                                                                                                                                                                                                                                                                       |
| VC_421_0  | KY566218,KY613597,KY624610,KY624611,KY624612,KY624613,KY624614,KY624615,KY624616                                                                                                                                                                                                                                                                                                                                                                                                                                                                                                                                                                                                                                                                                                                                                                                                                                                                                                                                                                                                                                                                                 |
| VC_422_0  | KY203335,KY250482,MW582634                                                                                                                                                                                                                                                                                                                                                                                                                                                                                                                                                                                                                                                                                                                                                                                                                                                                                                                                                                                                                                                                                                                                       |
| VC_423_0  | MG198783,MG198784,MH271305,MH271318,MT521997,MZ681507,ON456352                                                                                                                                                                                                                                                                                                                                                                                                                                                                                                                                                                                                                                                                                                                                                                                                                                                                                                                                                                                                                                                                                                   |
| VC_424_0  | LC644972,LC644974,MT843275                                                                                                                                                                                                                                                                                                                                                                                                                                                                                                                                                                                                                                                                                                                                                                                                                                                                                                                                                                                                                                                                                                                                       |
| VC_426_0  | KY065465,MK448733,MK448904                                                                                                                                                                                                                                                                                                                                                                                                                                                                                                                                                                                                                                                                                                                                                                                                                                                                                                                                                                                                                                                                                                                                       |
| VC_426_1  | MK448820                                                                                                                                                                                                                                                                                                                                                                                                                                                                                                                                                                                                                                                                                                                                                                                                                                                                                                                                                                                                                                                                                                                                                         |
| VC_427_0  | FR671405,FR671406,FR671407,FR671410,FR671411,HG799490,HG799496,HG799497,KJ417497,KT337339,KT337340,KT337341,KT337352,KT337354,KT337355,KT337356,KT337359,KT337362,KY065450,KY065451,KY065452,KY065456,KY065472,KY065473,KY065474,KY065475,KY065476,KY065477,KY065478,KY065480,KY065486,KY065488,KY065496,KY065497,KY065500,KY065505,OK173051                                                                                                                                                                                                                                                                                                                                                                                                                                                                                                                                                                                                                                                                                                                                                                                                                     |
| VC_428_0  | KY065449                                                                                                                                                                                                                                                                                                                                                                                                                                                                                                                                                                                                                                                                                                                                                                                                                                                                                                                                                                                                                                                                                                                                                         |
| VC_429_0  | MK448686,MK448762,MK448788,MK448791,MK448793,MK448862,MK448949,MK448951,MK448954,MK448958,MK448959,MK448960,MK448965,MK448977                                                                                                                                                                                                                                                                                                                                                                                                                                                                                                                                                                                                                                                                                                                                                                                                                                                                                                                                                                                                                                    |
| VC_43_0   | AJ556162,JQ347801,LC727891,LC727892,LC727893,LC727894,LC727896,LC727897,LC727898,LC727899,LC727899,LC727900,LC727901,LC727902,ON470597,ON470625                                                                                                                                                                                                                                                                                                                                                                                                                                                                                                                                                                                                                                                                                                                                                                                                                                                                                                                                                                                                                  |
| VC_43_1   | AP012530,AP012538,AP012539,AP012540,FJ184280,FJ188381,FM180578,LC645408,LC645425,LC645426                                                                                                                                                                                                                                                                                                                                                                                                                                                                                                                                                                                                                                                                                                                                                                                                                                                                                                                                                                                                                                                                        |
| VC_431_0  | MK448680,MK448684,MK448698,MK448769,MK448895                                                                                                                                                                                                                                                                                                                                                                                                                                                                                                                                                                                                                                                                                                                                                                                                                                                                                                                                                                                                                                                                                                                     |
| VC_433_0  | MF034659,MF166859,MT902335,MZ995503,MZ995506                                                                                                                                                                                                                                                                                                                                                                                                                                                                                                                                                                                                                                                                                                                                                                                                                                                                                                                                                                                                                                                                                                                     |
| VC_434_0  | AJ505558,AM265638,AM910651,EU056923,EU236438,FN263372,JQ307386,JX501340,JX997978,KC969441,KM067278,KR054031,KU743887,KX711710,KY618819,LC727700,LN610574,LN610580,MH107770,MH979674,MN553585,MN553587,MN553588,MN553589,MN602045,MN615698,MN615699,MN692672,MN871455,MN871483,MN901924,MW117144,MW406976,MZ553931,MZ687409,OK539824,OL754589,OL802210,ON857926,ON857928,ON857933,ON857935,OP292288,OP56577                                                                                                                                                                                                                                                                                                                                                                                                                                                                                                                                                                                                                                                                                                                                                       |
| VC_435_0  | AJ536073,AY257527,AY701338,CP013282,EU408779,MZ089978,MZ089979                                                                                                                                                                                                                                                                                                                                                                                                                                                                                                                                                                                                                                                                                                                                                                                                                                                                                                                                                                                                                                                                                                   |
| VC_437_0  | CP013974,MG575421,MZ424863                                                                                                                                                                                                                                                                                                                                                                                                                                                                                                                                                                                                                                                                                                                                                                                                                                                                                                                                                                                                                                                                                                                                       |
| VC_44_0   | AP012534,HE664024,HG792102,HG792103,HG792104,HG792105,HG803182,HG803183,HG803184,HG803185,HQ424691,JQ011318,KF971864,KP682371,KP682374,KR781488,KU298437,KY914478,LC645409,LC645410,LC645411,LC645412,LC645413,LC645414,LC645415,LC645416,LC645417,LC645418,LC645419,LC645420,LC645421,LC645422,LC645423,LC645424,LC645427,LC645438,LC645442,LC645443,LC645444,LC645445,LC645446,LC645447,LC645448,LC645449,LC645450,LC645451,LC727903,MG710528,MN067333                                                                                                                                                                                                                                                                                                                                                                                                                                                                                                                                                                                                                                                                                                         |
| VC_440_0  | KM366099,KX826077,KY608966,MF740800,MH181876,MK568062,MK673511,MK770411,MK770413,MN379740,MZ012730,MZ074434,MZ074435,MZ074436,MZ074437,MZ074438,MZ074439,MZ074441,MZ074442,MZ074443,MZ074444,MZ074445,MZ074446,MT663719,MT764207,MT768059,MW413353,MW508890,MW602648,MZ127825,OM313460,OM313461,OPI32241                                                                                                                                                                                                                                                                                                                                                                                                                                                                                                                                                                                                                                                                                                                                                                                                                                                         |
| VC_441_0  | KT588075,MZ514874                                                                                                                                                                                                                                                                                                                                                                                                                                                                                                                                                                                                                                                                                                                                                                                                                                                                                                                                                                                                                                                                                                                                                |
| VC_441_1  | CAK1QA020000001,JX403940,KP861230,KT588073,MH115576,MT361972,MZ675741,ON391949                                                                                                                                                                                                                                                                                                                                                                                                                                                                                                                                                                                                                                                                                                                                                                                                                                                                                                                                                                                                                                                                                   |
| VC_445_0  | MK448692,MK448702,MK448711,MK448716,MK448724,MK448730,MK448744,MK448745,MK448923                                                                                                                                                                                                                                                                                                                                                                                                                                                                                                                                                                                                                                                                                                                                                                                                                                                                                                                                                                                                                                                                                 |
| VC_446_0  | MN695334,MN695335                                                                                                                                                                                                                                                                                                                                                                                                                                                                                                                                                                                                                                                                                                                                                                                                                                                                                                                                                                                                                                                                                                                                                |
| VC_446_1  | MH412654                                                                                                                                                                                                                                                                                                                                                                                                                                                                                                                                                                                                                                                                                                                                                                                                                                                                                                                                                                                                                                                                                                                                                         |
| VC_446_10 | GU071098,HQ317391                                                                                                                                                                                                                                                                                                                                                                                                                                                                                                                                                                                                                                                                                                                                                                                                                                                                                                                                                                                                                                                                                                                                                |
| VC_446_11 | HQ633071                                                                                                                                                                                                                                                                                                                                                                                                                                                                                                                                                                                                                                                                                                                                                                                                                                                                                                                                                                                                                                                                                                                                                         |
| VC_446_12 | MW015081                                                                                                                                                                                                                                                                                                                                                                                                                                                                                                                                                                                                                                                                                                                                                                                                                                                                                                                                                                                                                                                                                                                                                         |
| VC_446_13 | MK799832                                                                                                                                                                                                                                                                                                                                                                                                                                                                                                                                                                                                                                                                                                                                                                                                                                                                                                                                                                                                                                                                                                                                                         |
| VC_446_14 | MN018232                                                                                                                                                                                                                                                                                                                                                                                                                                                                                                                                                                                                                                                                                                                                                                                                                                                                                                                                                                                                                                                                                                                                                         |
| VC_446_15 | KU686204,KU686205,KU686206                                                                                                                                                                                                                                                                                                                                                                                                                                                                                                                                                                                                                                                                                                                                                                                                                                                                                                                                                                                                                                                                                                                                       |
| VC_446_16 | MH629685                                                                                                                                                                                                                                                                                                                                                                                                                                                                                                                                                                                                                                                                                                                                                                                                                                                                                                                                                                                                                                                                                                                                                         |
| VC_446_2  | GU071095                                                                                                                                                                                                                                                                                                                                                                                                                                                                                                                                                                                                                                                                                                                                                                                                                                                                                                                                                                                                                                                                                                                                                         |
| VC_446_3  | MF351863                                                                                                                                                                                                                                                                                                                                                                                                                                                                                                                                                                                                                                                                                                                                                                                                                                                                                                                                                                                                                                                                                                                                                         |
| VC_446_4  | MT408532                                                                                                                                                                                                                                                                                                                                                                                                                                                                                                                                                                                                                                                                                                                                                                                                                                                                                                                                                                                                                                                                                                                                                         |
| VC_446_5  | MK867354                                                                                                                                                                                                                                                                                                                                                                                                                                                                                                                                                                                                                                                                                                                                                                                                                                                                                                                                                                                                                                                                                                                                                         |
| VC_446_6  | MH319749                                                                                                                                                                                                                                                                                                                                                                                                                                                                                                                                                                                                                                                                                                                                                                                                                                                                                                                                                                                                                                                                                                                                                         |
| VC_446_7  | MH319754                                                                                                                                                                                                                                                                                                                                                                                                                                                                                                                                                                                                                                                                                                                                                                                                                                                                                                                                                                                                                                                                                                                                                         |
| VC_446_8  | KM359505                                                                                                                                                                                                                                                                                                                                                                                                                                                                                                                                                                                                                                                                                                                                                                                                                                                                                                                                                                                                                                                                                                                                                         |
| VC_446_9  | AY939844,GU071092,HQ632825                                                                                                                                                                                                                                                                                                                                                                                                                                                                                                                                                                                                                                                                                                                                                                                                                                                                                                                                                                                                                                                                                                                                       |
| VC_447_0  | HQ634177,KU686192,KU686193,KU686194,KU686195,KU686196                                                                                                                                                                                                                                                                                                                                                                                                                                                                                                                                                                                                                                                                                                                                                                                                                                                                                                                                                                                                                                                                                                            |
| VC_447_1  | KJ019054,KJ019069,KJ019082,KJ019089,KJ019094,KJ019156,KU686200,KU686201,KU686202                                                                                                                                                                                                                                                                                                                                                                                                                                                                                                                                                                                                                                                                                                                                                                                                                                                                                                                                                                                                                                                                                 |
| VC_447_10 | KU686211                                                                                                                                                                                                                                                                                                                                                                                                                                                                                                                                                                                                                                                                                                                                                                                                                                                                                                                                                                                                                                                                                                                                                         |
| VC_447_2  | KFI56338                                                                                                                                                                                                                                                                                                                                                                                                                                                                                                                                                                                                                                                                                                                                                                                                                                                                                                                                                                                                                                                                                                                                                         |
| VC_447_3  | KU686197,KU686198,KU686199                                                                                                                                                                                                                                                                                                                                                                                                                                                                                                                                                                                                                                                                                                                                                                                                                                                                                                                                                                                                                                                                                                                                       |
| VC_447_4  | GU071105,KU594607,KX349291,KX349292,KX349293,KX349294,KX349295,KX349296,KX349297                                                                                                                                                                                                                                                                                                                                                                                                                                                                                                                                                                                                                                                                                                                                                                                                                                                                                                                                                                                                                                                                                 |
| VC_447_5  | AJ630128,LN828717                                                                                                                                                                                                                                                                                                                                                                                                                                                                                                                                                                                                                                                                                                                                                                                                                                                                                                                                                                                                                                                                                                                                                |
| VC_447_6  | KU594606                                                                                                                                                                                                                                                                                                                                                                                                                                                                                                                                                                                                                                                                                                                                                                                                                                                                                                                                                                                                                                                                                                                                                         |
| VC_447_7  | MW147367                                                                                                                                                                                                                                                                                                                                                                                                                                                                                                                                                                                                                                                                                                                                                                                                                                                                                                                                                                                                                                                                                                                                                         |
| VC_447_8  | FM207411                                                                                                                                                                                                                                                                                                                                                                                                                                                                                                                                                                                                                                                                                                                                                                                                                                                                                                                                                                                                                                                                                                                                                         |



|           |                                                                                                                                                                                                                                                                                                                                                                                                                                                                                                                                                                                                                                                                                                                                                                                                                                                                                                 |
|-----------|-------------------------------------------------------------------------------------------------------------------------------------------------------------------------------------------------------------------------------------------------------------------------------------------------------------------------------------------------------------------------------------------------------------------------------------------------------------------------------------------------------------------------------------------------------------------------------------------------------------------------------------------------------------------------------------------------------------------------------------------------------------------------------------------------------------------------------------------------------------------------------------------------|
| VC_447_9  | MW117966                                                                                                                                                                                                                                                                                                                                                                                                                                                                                                                                                                                                                                                                                                                                                                                                                                                                                        |
| VC_449_0  | MT162466,MT162467                                                                                                                                                                                                                                                                                                                                                                                                                                                                                                                                                                                                                                                                                                                                                                                                                                                                               |
| VC_449_1  | MX016664                                                                                                                                                                                                                                                                                                                                                                                                                                                                                                                                                                                                                                                                                                                                                                                                                                                                                        |
| VC_45_0   | EU078592,JQ086376,JQ182735,KT232076,LAMCG,LC730321,LR595850,LR595859,LR595860,LR595861,LR595863,LR595864,LR595865,LR595866,LR597635,LR597636,LR597639,LR597643,LR597644,LR597648,LR597650,LR597651,LR597652,LR597653,MF374379,MH547045,OL657226,OL657227,OL657228,OM418625,OM418626,OM418627,OM475427,OM475428,OM475430,OM475432,OM475435,OV696612                                                                                                                                                                                                                                                                                                                                                                                                                                                                                                                                              |
| VC_450_0  | MZ577095,MZ577096,MZ577097,MZ577098                                                                                                                                                                                                                                                                                                                                                                                                                                                                                                                                                                                                                                                                                                                                                                                                                                                             |
| VC_451_0  | KF381361,KR052480,KR052481,KR052482                                                                                                                                                                                                                                                                                                                                                                                                                                                                                                                                                                                                                                                                                                                                                                                                                                                             |
| VC_452_0  | MH319720,MH319733,MH319742,MH319753,MH319758,MH327487                                                                                                                                                                                                                                                                                                                                                                                                                                                                                                                                                                                                                                                                                                                                                                                                                                           |
| VC_453_0  | MH319750,MH319759                                                                                                                                                                                                                                                                                                                                                                                                                                                                                                                                                                                                                                                                                                                                                                                                                                                                               |
| VC_454_0  | AJ635161,AY722806,MN876845,MT047590                                                                                                                                                                                                                                                                                                                                                                                                                                                                                                                                                                                                                                                                                                                                                                                                                                                             |
| VC_456_0  | MK838116,MN102098,MN131137,MN159079                                                                                                                                                                                                                                                                                                                                                                                                                                                                                                                                                                                                                                                                                                                                                                                                                                                             |
| VC_456_1  | MN642089,ON287370,ON287375                                                                                                                                                                                                                                                                                                                                                                                                                                                                                                                                                                                                                                                                                                                                                                                                                                                                      |
| VC_456_2  | JN627160,MK689364,MZ348422,MZ501267                                                                                                                                                                                                                                                                                                                                                                                                                                                                                                                                                                                                                                                                                                                                                                                                                                                             |
| VC_456_3  | MN032614,MN453779,OL964756                                                                                                                                                                                                                                                                                                                                                                                                                                                                                                                                                                                                                                                                                                                                                                                                                                                                      |
| VC_456_4  | MK774614,OM810292                                                                                                                                                                                                                                                                                                                                                                                                                                                                                                                                                                                                                                                                                                                                                                                                                                                                               |
| VC_457_0  | AY266303,GU396103,HM452126,MC250483,MH791401,MH791407,MN871440                                                                                                                                                                                                                                                                                                                                                                                                                                                                                                                                                                                                                                                                                                                                                                                                                                  |
| VC_457_1  | MT161459                                                                                                                                                                                                                                                                                                                                                                                                                                                                                                                                                                                                                                                                                                                                                                                                                                                                                        |
| VC_457_2  | MH791414,MW272540                                                                                                                                                                                                                                                                                                                                                                                                                                                                                                                                                                                                                                                                                                                                                                                                                                                                               |
| VC_457_3  | GU459069,KY290955                                                                                                                                                                                                                                                                                                                                                                                                                                                                                                                                                                                                                                                                                                                                                                                                                                                                               |
| VC_457_4  | JX123262,MF448340,MF498773,MF498775,MH791398,MH791404,MN871441,MN871442,MT713136,OM339718                                                                                                                                                                                                                                                                                                                                                                                                                                                                                                                                                                                                                                                                                                                                                                                                       |
| VC_458_0  | AJ783769,JQ287645                                                                                                                                                                                                                                                                                                                                                                                                                                                                                                                                                                                                                                                                                                                                                                                                                                                                               |
| VC_459_0  | MT732443,MT732444                                                                                                                                                                                                                                                                                                                                                                                                                                                                                                                                                                                                                                                                                                                                                                                                                                                                               |
| VC_459_1  | KC821607,KC821618                                                                                                                                                                                                                                                                                                                                                                                                                                                                                                                                                                                                                                                                                                                                                                                                                                                                               |
| VC_460_0  | HG322870,KP238129,KP282677,KP282678                                                                                                                                                                                                                                                                                                                                                                                                                                                                                                                                                                                                                                                                                                                                                                                                                                                             |
| VC_461_0  | AJ888457,KX607101,KX607102                                                                                                                                                                                                                                                                                                                                                                                                                                                                                                                                                                                                                                                                                                                                                                                                                                                                      |
| VC_462_0  | KU878088,LC680884,MF360957,MW749003                                                                                                                                                                                                                                                                                                                                                                                                                                                                                                                                                                                                                                                                                                                                                                                                                                                             |
| VC_462_1  | KT895374                                                                                                                                                                                                                                                                                                                                                                                                                                                                                                                                                                                                                                                                                                                                                                                                                                                                                        |
| VC_463_0  | LC680885,MN091626,MW218148,MW248466,MW349128,MW349129,MZ779063                                                                                                                                                                                                                                                                                                                                                                                                                                                                                                                                                                                                                                                                                                                                                                                                                                  |
| VC_464_0  | AM076770,MN617773,MT366931,MT366932,MT366933,MT366934,MT366935,MT366936,MT366937,MT366938,MT366939,MT366940,MT366941,MT366942,MT366943,MT366944                                                                                                                                                                                                                                                                                                                                                                                                                                                                                                                                                                                                                                                                                                                                                 |
| VC_465_0  | AM084414,DQ111067,EU734172,HG813241,HG818823,HG818824,KC109329,KJ748011,KJ7990215,KU687349,KU687350,KU687351,KX669227,KX689784,KY295894,KY962008,LT594300,MF630921,MG845865,MH400309,MH464253,MH491167,MK033136,MK301532,MK610268,MK903277,MK903279,MK903281,MN067430,MN218775,MN414250,MN510331,MN518893,MN518894,MN715150,MN812686,MT350292,MT446393,MT446394,MT496969,MT682707,MT808983,MT862763,MW258709,MW345254,MW416012,MW748991,MW876471,MZ223858,MZ234009,MZ234011,MZ234021,MZ234022,MZ234023,MZ234024,MZ234044,MZ234045,MZ234046,MZ234047,MZ311861,MZ311862,MZ398247,MZ648215,MZ726794,MZ923531,OK210074,OL362275,OL362276,OL539729,OL773676,OL773677,OM256482,OM355495,OM457002,OM867676,OM908436,OM937123,ON528733,ON548433,ON637250                                                                                                                                                |
| VC_466_0  | AM084415,AY288927,AY370673,AY370674,GU595417,JN986844,JQ837901,KM366097,KM370384,KM819695,KM819696,KP890822,KU946962,KX279892,KY295891,KY295892,KY295893,KY295897,KY295899,KY435490,KY744566,LC730323,MC004687,MC251390,MC775042,MH729818,MK373771,MK373773,MK380014,MN384978,MT496971,MT680615,MW394389,MZ031013,MZ2234019,MZ2234019,MZ2234020,MZ2234032,MZ2234049,MZ2234050,MZ398244,MZ573924,MZ747518,MZ997839,MZ997840,MZ997841,OK625527,OL362272,OL362273,OL744215,OL744218,ON148527,ON185580,ON210144,ON210145,ON461912,ON526839,ON602763,ON602764,ON602765,OP018999,OP038547,OP079918,OP413828,OP413830,OX335382                                                                                                                                                                                                                                                                         |
| VC_467_0  | EF160123,FQ482084,FQ482086,MG736918,OK570184,OM486945                                                                                                                                                                                                                                                                                                                                                                                                                                                                                                                                                                                                                                                                                                                                                                                                                                           |
| VC_469_0  | DQ121662,JF770475,JQ182736,KC333879,KC579452,KF771236,KF771237,KF771238,KF771239,KJ668713,KT825490,MF158039,MF158042,MW286156,OL539447,OL539451,OL539453,OL539467                                                                                                                                                                                                                                                                                                                                                                                                                                                                                                                                                                                                                                                                                                                               |
| VC_47_0   | AJ298298,AY055382,KC736978,KC814930,KU927493,MK733259,MK733260,MK733261,MZ501270,ON470584,ON470603,SFU82619                                                                                                                                                                                                                                                                                                                                                                                                                                                                                                                                                                                                                                                                                                                                                                                     |
| VC_470_0  | AM156909,JN986845,KX130960,KY398841,MC050172,MC065688,MK372342,MK373793,MK907226,MK907227,MK907228,MK907229,MK907230,MK907231,MK907232,MK907233,MK907234,MK907235,MK907240,MK907241,MK907242,MK907243,MK907244,MK907246,MK907247,MK907248,MK907249,MK907250,MK907251,MK907252,MK907254,MK907255,MK907256,MK907257,MK907258,MK907259,MK907260,MK907261,MK907262,MK907263,MK907264,MK907265,MK907266,MK907272,MK907273,MK907274,MK907275,MK907276,MN164484,MN840485,MT511058,MT682706,MW057918,MZ501051,MZ501080,MZ501087,OM258170,ON081052,OP087522,OP251154                                                                                                                                                                                                                                                                                                                                     |
| VC_472_0  | MH059632,MH807810,MH807813,MH807815,MH807817                                                                                                                                                                                                                                                                                                                                                                                                                                                                                                                                                                                                                                                                                                                                                                                                                                                    |
| VC_473_0  | KC292023,MC0550112,MZ334526                                                                                                                                                                                                                                                                                                                                                                                                                                                                                                                                                                                                                                                                                                                                                                                                                                                                     |
| VC_474_0  | JF974294,JF974312,MK327140,MT682064,MW119258,MW722082,MZ318367,MZ440881,MZ836210,OL362277,OL617041,ON602730,ON602737,ON602738,ON602744,ON602759,ON602760,OP373729,OP481875                                                                                                                                                                                                                                                                                                                                                                                                                                                                                                                                                                                                                                                                                                                      |
| VC_475_0  | AM491472,KX017520,KX523699,KY860935,MF158038,MH023293,MH321493,MH424446,MH717097,MH791402,MH791410,MH791412,MK112901,MK599416,MK759854,MK947460,MN692673,MN737551,MN871490,MN871503,MT768060,MW427215,MW477799,MZ375232,MZ375295,MZ375296,MZ375297,MZ375298,MZ375299,MZ375300,MZ375301,MZ375302,MZ375303,MZ375304,MZ375305,MZ375306,MZ375307,MZ375308,MZ375309,MZ375310,MZ375311,MZ375312,MZ375313,MZ375314,MZ375315,MZ375316,MZ375317,MZ375318,MZ375319,MZ375320,MZ375321,MZ375322,MZ375323,MZ375324,MZ375325,MZ375326,MZ375327,MZ375328,MZ375329,MZ375330,MZ375331,MZ375332,MZ375333,MZ375334,MZ375335,MZ375336,MZ375337,MZ375338,MZ375339,MZ375340,MZ375341,MZ375342,MZ375343,MZ375344,MZ375345,MZ375346,MZ375347,MZ375348,MZ375349,MZ375350,MZ375351,MZ375352,MZ375353,MZ375354,MZ375355,MZ489634,MZ726796,OL362274,OL964734,OL964742,OL964743,OL964744,OL964751,OL964752,ON239132,ON637251 |
| VC_477_0  | AM749121,DQ386162,KR153145,MT430910                                                                                                                                                                                                                                                                                                                                                                                                                                                                                                                                                                                                                                                                                                                                                                                                                                                             |
| VC_478_0  | JQ067087,KU356689,LN610577,LN610584,LN610585,MT108725,MT108731,MZ926748                                                                                                                                                                                                                                                                                                                                                                                                                                                                                                                                                                                                                                                                                                                                                                                                                         |
| VC_479_0  | JQ067084,KX129925,KX898399,KX898400,MN504636,MW835180,ON911540                                                                                                                                                                                                                                                                                                                                                                                                                                                                                                                                                                                                                                                                                                                                                                                                                                  |
| VC_48_0   | KF766125,KJ603229                                                                                                                                                                                                                                                                                                                                                                                                                                                                                                                                                                                                                                                                                                                                                                                                                                                                               |
| VC_480_0  | MW091529,MW202777,MW462191                                                                                                                                                                                                                                                                                                                                                                                                                                                                                                                                                                                                                                                                                                                                                                                                                                                                      |
| VC_481_0  | MN862068,ON529856,ON529859,ON529862,ON529864                                                                                                                                                                                                                                                                                                                                                                                                                                                                                                                                                                                                                                                                                                                                                                                                                                                    |
| VC_482_0  | MN988465,MN988541,MN988554,ON014755                                                                                                                                                                                                                                                                                                                                                                                                                                                                                                                                                                                                                                                                                                                                                                                                                                                             |
| VC_483_0  | MT536174,OL960029                                                                                                                                                                                                                                                                                                                                                                                                                                                                                                                                                                                                                                                                                                                                                                                                                                                                               |
| VC_484_0  | MN698239,MN698241,MW574966                                                                                                                                                                                                                                                                                                                                                                                                                                                                                                                                                                                                                                                                                                                                                                                                                                                                      |
| VC_485_0  | MW677525,OP009285                                                                                                                                                                                                                                                                                                                                                                                                                                                                                                                                                                                                                                                                                                                                                                                                                                                                               |
| VC_486_0  | AM910650,AY078382,HE983844,HF543949,HG518155,JN254801,JX863101,KC294142,KF856712,KP233880,KR054029,LC648443,LN610578,MF768469,MG432151,MG589385,MG589386,MG845684,MH937325,MK837011,MK837012,MN508619,MN553586,MN562749,MN871476,MN871484,MT108723,MT108724,MT118288,MT119362,MT119371,MT119373,MW329986,MW512831,MW526260,MZ089732,MZ089733,MZ089738,MZ089739,MZ089740,MZ089742,OL441337,ON156559,ON376263,ON857927,ON857936,OP42787                                                                                                                                                                                                                                                                                                                                                                                                                                                           |
| VC_487_0  | CP067352                                                                                                                                                                                                                                                                                                                                                                                                                                                                                                                                                                                                                                                                                                                                                                                                                                                                                        |
| VC_487_1  | CP069348                                                                                                                                                                                                                                                                                                                                                                                                                                                                                                                                                                                                                                                                                                                                                                                                                                                                                        |
| VC_487_2  | CP011970,LN681537                                                                                                                                                                                                                                                                                                                                                                                                                                                                                                                                                                                                                                                                                                                                                                                                                                                                               |
| VC_487_3  | MF547662,MF47663                                                                                                                                                                                                                                                                                                                                                                                                                                                                                                                                                                                                                                                                                                                                                                                                                                                                                |
| VC_487_4  | CP067347                                                                                                                                                                                                                                                                                                                                                                                                                                                                                                                                                                                                                                                                                                                                                                                                                                                                                        |
| VC_488_0  | HM029250,KF926093,KM677185,KY554768,KY554769,KY554770,KY554771,KY554772,KY554773,KY554774,KY554775,KY554776,KY554777,MN552145                                                                                                                                                                                                                                                                                                                                                                                                                                                                                                                                                                                                                                                                                                                                                                   |
| VC_489_0  | OM236516,OM634653,ON133270                                                                                                                                                                                                                                                                                                                                                                                                                                                                                                                                                                                                                                                                                                                                                                                                                                                                      |
| VC_489_1  | OK499972,OK499987,OK499994                                                                                                                                                                                                                                                                                                                                                                                                                                                                                                                                                                                                                                                                                                                                                                                                                                                                      |
| VC_489_10 | OK499992,ON548418                                                                                                                                                                                                                                                                                                                                                                                                                                                                                                                                                                                                                                                                                                                                                                                                                                                                               |
| VC_489_2  | KC481682,MT254578,ON548420                                                                                                                                                                                                                                                                                                                                                                                                                                                                                                                                                                                                                                                                                                                                                                                                                                                                      |
| VC_489_3  | ON881243                                                                                                                                                                                                                                                                                                                                                                                                                                                                                                                                                                                                                                                                                                                                                                                                                                                                                        |
| VC_489_4  | MH884508                                                                                                                                                                                                                                                                                                                                                                                                                                                                                                                                                                                                                                                                                                                                                                                                                                                                                        |



|           |                                                                                                                                                                                                                                                                                                                                                                                                                                                 |
|-----------|-------------------------------------------------------------------------------------------------------------------------------------------------------------------------------------------------------------------------------------------------------------------------------------------------------------------------------------------------------------------------------------------------------------------------------------------------|
| VC_489_5  | ON548417,ON548419                                                                                                                                                                                                                                                                                                                                                                                                                               |
| VC_489_6  | KT070867                                                                                                                                                                                                                                                                                                                                                                                                                                        |
| VC_489_7  | MW084976                                                                                                                                                                                                                                                                                                                                                                                                                                        |
| VC_489_8  | MK288021,OK499991                                                                                                                                                                                                                                                                                                                                                                                                                               |
| VC_489_9  | ON548421                                                                                                                                                                                                                                                                                                                                                                                                                                        |
| VC_49_0   | LC616031,LC616032,LC616033,LC616034,LC616035,LC616036,LC616037,LC616038,LC616039,LC616040,LC616041,LC616042,LC616043,LC616044,LC616045,LC616046,LC616047,LC616048,LC616049,LC616050,LC616051,LC616052,LC616053,LC616054,LC616055,LC616056,LC616057,LC616058,LC616059,LC616060,LC616061,LC616062,LC616063,LC616064,LC616065,LC616066,LC616067,LC616068,LC616069,LC616070,LC616071,LC616072,LC616073,LC616074,LC616075,LC616076,LC616077,LC616078 |
| VC_493_0  | AP011616,AP011617,DQ997624,MK257744                                                                                                                                                                                                                                                                                                                                                                                                             |
| VC_494_0  | MG592415,OX241562                                                                                                                                                                                                                                                                                                                                                                                                                               |
| VC_494_1  | MW073017                                                                                                                                                                                                                                                                                                                                                                                                                                        |
| VC_495_0  | OM416763,OM416764,OM416765,OM416766,OM416767,OM416768,OM416769,OM416770,OM416771,OM416772,OM416773,OM416774,OM416775,OM416776,OM416777,OM416778,OM416779                                                                                                                                                                                                                                                                                        |
| VC_496_0  | AP013540,AP013541,AP013542,AP013545,KC465901,MH579717,MH598798,MH598800,MH598801,MH598802,MH598803,MH598804,MH598805,MH598806,MH598807,MT375520,MT375521,MT375526,MT375527,MT375528,MT375530,MT375531                                                                                                                                                                                                                                           |
| VC_497_0  | JX483873,KT997847,MW023914,MW980070                                                                                                                                                                                                                                                                                                                                                                                                             |
| VC_498_0  | AP013546,AP013547,AP013548,MW822601                                                                                                                                                                                                                                                                                                                                                                                                             |
| VC_50_0   | LC645428,LC645429,LC645430,LC645431,LC645432,LC645433,LC645434,LC645435,LC645436,LC645437                                                                                                                                                                                                                                                                                                                                                       |
| VC_500_0  | KJ183191,KJ183192,KJ183193                                                                                                                                                                                                                                                                                                                                                                                                                      |
| VC_501_0  | MN698242,MN698243,MN698247                                                                                                                                                                                                                                                                                                                                                                                                                      |
| VC_502_0  | KC465898,MT375525,MT647605,MW273920,MW273922,MW273923,MW273924,MW273925,MW273926,OP131293,OP131294,OP131295,OP131296,OP131297,OP131299,OP131300,OP131301,OP131302                                                                                                                                                                                                                                                                               |
| VC_503_0  | MT375519,MT375529                                                                                                                                                                                                                                                                                                                                                                                                                               |
| VC_504_0  | JQ245707,OP053360,OP053361,OP053362                                                                                                                                                                                                                                                                                                                                                                                                             |
| VC_506_0  | MN871446,MN871447,MN871448,MN871449,MN871451,MN871452,MN871453,MW394391                                                                                                                                                                                                                                                                                                                                                                         |
| VC_506_1  | MF285618,MK994515,MW021758,OK040170,OL539468,ON287372,ON287376,ON375847                                                                                                                                                                                                                                                                                                                                                                         |
| VC_506_2  | KF623294,MN334766                                                                                                                                                                                                                                                                                                                                                                                                                               |
| VC_507_0  | MN445183,MW845760,MW879340                                                                                                                                                                                                                                                                                                                                                                                                                      |
| VC_507_1  | KF806589,KU886222,KU886223,KU886224,KU886225,MG655267,MG655268,MG655269,MG655270,MK514281,MZ501268                                                                                                                                                                                                                                                                                                                                              |
| VC_507_2  | MT661596                                                                                                                                                                                                                                                                                                                                                                                                                                        |
| VC_508_0  | AP014714,AP014715                                                                                                                                                                                                                                                                                                                                                                                                                               |
| VC_508_1  | MN087708,MN882610,MZ348423,OL989991,ON630910                                                                                                                                                                                                                                                                                                                                                                                                    |
| VC_508_2  | KF835987                                                                                                                                                                                                                                                                                                                                                                                                                                        |
| VC_508_3  | HE956709,KY593455                                                                                                                                                                                                                                                                                                                                                                                                                               |
| VC_508_4  | KP202158                                                                                                                                                                                                                                                                                                                                                                                                                                        |
| VC_508_5  | MH059636                                                                                                                                                                                                                                                                                                                                                                                                                                        |
| VC_508_6  | MT920315                                                                                                                                                                                                                                                                                                                                                                                                                                        |
| VC_509_0  | CP062992,KR269720,KT239446,KX258185,KY000080,LR877331,MG751100,MH333064,MH729874,MK421971,MN101226,MN101229,MN101230,MN434095,MT580897,MT701588,MW021752,MW239157,MZ560702,MZ602148,MZ890186,OK499980,OK499981,OK499996,OK499997,OK631811,OL539458,OL870318,OL870319,OM337876,OM337877,OM630219,ON550260,OP331213,OP617748,OU509536                                                                                                             |
| VC_509_1  | MN101225                                                                                                                                                                                                                                                                                                                                                                                                                                        |
| VC_51_0   | LC727840,LC727841,LC727842,LC727843,LC727844,LC727845,LC727846,LC727847,LC727848,LC727849,LC727850,LC727851,LC727852,LC727853,LC727854,LC727855,LC727856,LC727857,LC727858,LC727859,LC727860,LC727861,LC727862,LC727863,LC727864,LC727865,LC727866,LC727867,LC727868,LC727869,LC727870,LC727871,LC727872,LC727873,LC727874,LC727875                                                                                                             |
| VC_510_0  | HQ698922,MK240351                                                                                                                                                                                                                                                                                                                                                                                                                               |
| VC_510_1  | CAK1,QC020000001,CAK1,QD020000001,MH165274,MH460829,MH713599,MN648195,MN662249,MN709128,MN723850,MN732883,MN782535,MT385367,MT409116,MT741943,OL763420,OL770258,OL770259,OL770261,OL770262,OP585103                                                                                                                                                                                                                                             |
| VC_510_2  | MK278860,MN864865,MT949699,MW388001,MW388002,MW388003,MW388004,OL770260                                                                                                                                                                                                                                                                                                                                                                         |
| VC_510_3  | GU911519                                                                                                                                                                                                                                                                                                                                                                                                                                        |
| VC_510_4  | HM004124                                                                                                                                                                                                                                                                                                                                                                                                                                        |
| VC_510_5  | HM032710                                                                                                                                                                                                                                                                                                                                                                                                                                        |
| VC_510_6  | HM114315                                                                                                                                                                                                                                                                                                                                                                                                                                        |
| VC_511_0  | KT932418                                                                                                                                                                                                                                                                                                                                                                                                                                        |
| VC_511_1  | MG592562                                                                                                                                                                                                                                                                                                                                                                                                                                        |
| VC_511_10 | HQ634156                                                                                                                                                                                                                                                                                                                                                                                                                                        |
| VC_511_11 | KX507046                                                                                                                                                                                                                                                                                                                                                                                                                                        |
| VC_511_12 | MW824371,MW824372                                                                                                                                                                                                                                                                                                                                                                                                                               |
| VC_511_13 | MW824376                                                                                                                                                                                                                                                                                                                                                                                                                                        |
| VC_511_14 | HQ316579                                                                                                                                                                                                                                                                                                                                                                                                                                        |
| VC_511_15 | HQ634195                                                                                                                                                                                                                                                                                                                                                                                                                                        |
| VC_511_16 | MG592553                                                                                                                                                                                                                                                                                                                                                                                                                                        |
| VC_511_2  | MG592529                                                                                                                                                                                                                                                                                                                                                                                                                                        |
| VC_511_3  | OX241437                                                                                                                                                                                                                                                                                                                                                                                                                                        |
| VC_511_4  | OX241455                                                                                                                                                                                                                                                                                                                                                                                                                                        |
| VC_511_5  | AP014858                                                                                                                                                                                                                                                                                                                                                                                                                                        |
| VC_511_6  | MG592495                                                                                                                                                                                                                                                                                                                                                                                                                                        |
| VC_511_7  | HQ634157                                                                                                                                                                                                                                                                                                                                                                                                                                        |
| VC_511_8  | MG592441                                                                                                                                                                                                                                                                                                                                                                                                                                        |
| VC_511_9  | ON922990                                                                                                                                                                                                                                                                                                                                                                                                                                        |
| VC_513_0  | KY883638,KY883639,KY883640,MH310933,MH310935,MN419153,MW794150,MW794151,MW794152,MW794153,MW794154,MW794155,MW794156,MW794157,MW794158,MW794159,MW794160,MW794161,MW794162,MW794163,MW794164,MW794165,MW794166,MW794167,MW794168,MW794169,MW794170,MW794171,MW794172,MW794173,MW794176,MW794177,MW794179,MW794180,MW794182,MW794183,MW794188,MW794190,MZ292654                                                                                  |
| VC_513_1  | HQ641347,HQ641348,HQ641349,HQ641350,HQ641351,HQ641352,HQ641353,HQ641354,KY065147,KY883634,KY883635,KY883636,KY883637,MH310934,MH310936,MN402506,MW794140,MW794141,MW794142,MW794143,MW794144,MW794145,MW794146,MW794147,MW794148,MW794149,MW794174,MW794175,MW794178,MW794181,MW794184,MW794185,MW794186,MW794187,MW794189,MW794191,MW794192,MW911612,MW911613,MW911614,MW911615                                                                |
| VC_514_0  | KF302034                                                                                                                                                                                                                                                                                                                                                                                                                                        |
| VC_514_1  | MF370964                                                                                                                                                                                                                                                                                                                                                                                                                                        |
| VC_514_2  | KR534323                                                                                                                                                                                                                                                                                                                                                                                                                                        |
| VC_514_3  | KX822733                                                                                                                                                                                                                                                                                                                                                                                                                                        |
| VC_515_0  | AP014887,AY328852,AY328853,KF854250,KX196154,KY622015,MG592395,OL658619                                                                                                                                                                                                                                                                                                                                                                         |
| VC_516_0  | KT160311,MG592392,MG592401,MG592414,MG592451,MG592461,MG592462,MG592467,MG592468,MG592472,MG592499,MG592526,MG592531,MG592541,MG592542,MG592547,MG592561,MG592572,MG592590,MG592592,MG592611,MW824380,MW824381,MW824382                                                                                                                                                                                                                         |



|           |                                                                                                                                                                                                                                                                                                                                                                                                                                                                                                                                                                                                                                                                                                                                                                                                                                                                                                                                                                                                             |
|-----------|-------------------------------------------------------------------------------------------------------------------------------------------------------------------------------------------------------------------------------------------------------------------------------------------------------------------------------------------------------------------------------------------------------------------------------------------------------------------------------------------------------------------------------------------------------------------------------------------------------------------------------------------------------------------------------------------------------------------------------------------------------------------------------------------------------------------------------------------------------------------------------------------------------------------------------------------------------------------------------------------------------------|
| VC_517_0  | OM287554,OM732336,OM732337                                                                                                                                                                                                                                                                                                                                                                                                                                                                                                                                                                                                                                                                                                                                                                                                                                                                                                                                                                                  |
| VC_518_0  | AP014888,MG592509,MG592546,MG592620,MG592623,OX241426,OX241428,OX241430,OX241431,OX241432,OX241441,OX241448,OX241449,OX241494,OX241567,OX241568                                                                                                                                                                                                                                                                                                                                                                                                                                                                                                                                                                                                                                                                                                                                                                                                                                                             |
| VC_52_0   | AF083977,GQ357916,KP010268,LR595867,MT374852,MT374853,MT374854,MT374856,MT591577                                                                                                                                                                                                                                                                                                                                                                                                                                                                                                                                                                                                                                                                                                                                                                                                                                                                                                                            |
| VC_520_0  | MT774408,MT774409                                                                                                                                                                                                                                                                                                                                                                                                                                                                                                                                                                                                                                                                                                                                                                                                                                                                                                                                                                                           |
| VC_520_1  | MT774410,MT774411                                                                                                                                                                                                                                                                                                                                                                                                                                                                                                                                                                                                                                                                                                                                                                                                                                                                                                                                                                                           |
| VC_523_0  | MW353175,MW353176,MW353177                                                                                                                                                                                                                                                                                                                                                                                                                                                                                                                                                                                                                                                                                                                                                                                                                                                                                                                                                                                  |
| VC_524_0  | KR560069,MK580972,MN095772,MN098328,MZ042490,MZ326868,MZ398248,OL702939                                                                                                                                                                                                                                                                                                                                                                                                                                                                                                                                                                                                                                                                                                                                                                                                                                                                                                                                     |
| VC_524_1  | ON758385                                                                                                                                                                                                                                                                                                                                                                                                                                                                                                                                                                                                                                                                                                                                                                                                                                                                                                                                                                                                    |
| VC_525_0  | AP018462,AP018463,KY130461,MH001446,MH001450,MK494114,MK494131,MK494132                                                                                                                                                                                                                                                                                                                                                                                                                                                                                                                                                                                                                                                                                                                                                                                                                                                                                                                                     |
| VC_526_0  | AY129334,DQ398048,JN618996,JN698991,JN699004,KF024722,KM101117,KR997932,KT365402,KT880194,KX443696,MG757162,MG812490,MG812491,MH001452,MH051249,MH590591,MH697584,MH727546,MK061411,MK620898,MK814751,MN234225,MN428049,MN586045,MN586046,MN813678,MT639652,MW712731,MZ456036,ON970587,ON970593                                                                                                                                                                                                                                                                                                                                                                                                                                                                                                                                                                                                                                                                                                             |
| VC_527_0  | DQ398049,EU816589,FI641182,JI704095,JN698992,JN699003,JN699006,JN699018,KF493879,KJ194581,KJ194584,KP027207,KR080203,KR080205,MG839014,MG920059,MG925338,MG925353,MH051265,MH316565,MH513976,MH576977,MK061414,MK359357,MN096359,MN096360,MN234223,MN444872,MN444873,MT310871,MT310892,MT952851,MW924644,MZ171375,MZ171381,OK318960,OP434441                                                                                                                                                                                                                                                                                                                                                                                                                                                                                                                                                                                                                                                                |
| VC_528_0  | MH153810,MK801725,MN234196,MN369758,MN908693,MT657335,OK216879,OM105886,ON081333,ON108644,ON260813,OP434461                                                                                                                                                                                                                                                                                                                                                                                                                                                                                                                                                                                                                                                                                                                                                                                                                                                                                                 |
| VC_529_0  | JN698995,OP172873,OP172874                                                                                                                                                                                                                                                                                                                                                                                                                                                                                                                                                                                                                                                                                                                                                                                                                                                                                                                                                                                  |
| VC_53_0   | AB285204,JI182728,LR595868,LR597641,MF807953,MW057859,ON470578,ON470598,ON470618,OV696610                                                                                                                                                                                                                                                                                                                                                                                                                                                                                                                                                                                                                                                                                                                                                                                                                                                                                                                   |
| VC_531_0  | AP018485,JI704111,JI957058,KC172839,KJ510415,KM592966,KT326767,KX640831,KX670828,KX683423,KY464936,LC730317,MF373840,MG812492,MH020248,MH047632,MH047633,MH051259,MH316563,MH976517,MK284519,MK494127,MK524496,MN062706,MN062712,MN586063,MT310878,MT310879,MT310880,MT310881,MW712718,ON970623                                                                                                                                                                                                                                                                                                                                                                                                                                                                                                                                                                                                                                                                                                             |
| VC_532_0  | AY129332,HM755814,JI704098,JI704101,JI704114,KC661272,KC661281,KF279418,KM101119,KM233454,KM233455,KP017310,KP017311,KP027202,KT359365,KT381277,KU255188,KU578077,KU984914,KU985091,KX458237,KX507362,KX523125,KX664448,KX670788,KX808129,KY965063,MF185729,MF185732,MF185733,MG757161,MG925341,MG925355,MH020238,MH077583,MH155864,MH338240,MH371121,MH399776,MH450119,MH450124,MH450126,MH450128,MH513975,MH536813,MH536825,MH576949,MH651179,MH727554,MK112543,MK279903,MK279913,MK284518,MK310140,MK359341,MK433273,MK494096,MK494128,MK875800,MK967399,MN062718,MN096368,MN284900,MN497953,MN585969,MN585984,MN586048,MN813699,MT657331,MT897907,MW507128,MZ681518,MZ747514,OK318959,OK999978                                                                                                                                                                                                                                                                                                          |
| VC_533_0  | JQ512844,JX307704,JX411619,KC661279,KJ156985,KM101120,MF773750,MH001459,MK494124,MN586038,MN807247,MT522002,MZ322017,MZ355723,MZ622159,ON337196                                                                                                                                                                                                                                                                                                                                                                                                                                                                                                                                                                                                                                                                                                                                                                                                                                                             |
| VC_534_0  | MW314854,MW584159,MW584197                                                                                                                                                                                                                                                                                                                                                                                                                                                                                                                                                                                                                                                                                                                                                                                                                                                                                                                                                                                  |
| VC_535_0  | JI704093,JN243857,KX550442,KX579975,KX641260,KY083059,MF668278,MK279898,MK359310,MK359322,MK494115,MK494117,MK494129,MK875799,MN284905,MN813697,MZ322023,ON970614                                                                                                                                                                                                                                                                                                                                                                                                                                                                                                                                                                                                                                                                                                                                                                                                                                           |
| VC_535_1  | GQ303263,HM152766,JI792674,JN243856,JN561150,JN699015,JQ809701,JQ896627,JX307702,JX307703,KC661271,KF024733,KF841475,KF841476,KF954506,KP959563,KJ510414,KP027198,KP057620,KT365397,KT716493,KU055616,KU867906,KU985092,KU985094,KX458236,KX550441,KX557234,KX619601,KX648373,KX808130,KX817174,KX817175,KY006473,KY083058,KY083060,KY083061,KY083062,KY083063,KY204244,KY204245,KY204246,KY204247,KY204248,KY204249,KY204250,KY204251,KY471266,KY549155,MF919496,MF919509,MG099942,MG944217,MG944224,MG962373,MH020249,MH051247,MH077581,MH155875,MH155879,MH230877,MH399777,MH399785,MH479909,MH479911,MH509443,MH536817,MH651170,MH697588,MH727563,MH825710,MK279902,MK310145,MK359301,MK359323,MK359325,MK359340,MK359356,MK494088,MK494093,MK494094,MK494097,MK494101,MK494125,MK494126,MK878895,MK878905,MN728684,MN813696,MT114158,MT490373,MT498056,MT553338,MT553346,MT723939,MT818417,MT889382,MT889386,MT889390,MW291019,MZ005673,MZ171380,MZ322025,MZ355725,MZ747509,ON637771,ON970565,OP297529 |
| VC_536_0  | AP018487,FI168659,HM152765,JN699001,MN234195,MN234236                                                                                                                                                                                                                                                                                                                                                                                                                                                                                                                                                                                                                                                                                                                                                                                                                                                                                                                                                       |
| VC_536_1  | AY129333,KP027201                                                                                                                                                                                                                                                                                                                                                                                                                                                                                                                                                                                                                                                                                                                                                                                                                                                                                                                                                                                           |
| VC_537_0  | JN412591,JN572061,KC691256,KF841477,KP027200,KR080195,KT347313,KU985090,KX641262,MF133446,MF140399,MF281061,MF373843,MF472894,MF919492,MG198785,MK016499,MK494122,MK524508,MK814758,MK820639,MK919480,MK937604,MN010757,MN096356,MN585977,MN807248,MN807249,MN807250,MN892484,MN892486,MN908683,MT024866,MT498061,MW055902,ON637760,ON970574,OP172867,OP434454                                                                                                                                                                                                                                                                                                                                                                                                                                                                                                                                                                                                                                              |
| VC_538_0  | KT309034                                                                                                                                                                                                                                                                                                                                                                                                                                                                                                                                                                                                                                                                                                                                                                                                                                                                                                                                                                                                    |
| VC_538_1  | MT889374                                                                                                                                                                                                                                                                                                                                                                                                                                                                                                                                                                                                                                                                                                                                                                                                                                                                                                                                                                                                    |
| VC_538_10 | MN369752                                                                                                                                                                                                                                                                                                                                                                                                                                                                                                                                                                                                                                                                                                                                                                                                                                                                                                                                                                                                    |
| VC_538_11 | MN585995                                                                                                                                                                                                                                                                                                                                                                                                                                                                                                                                                                                                                                                                                                                                                                                                                                                                                                                                                                                                    |
| VC_538_12 | MN735431                                                                                                                                                                                                                                                                                                                                                                                                                                                                                                                                                                                                                                                                                                                                                                                                                                                                                                                                                                                                    |
| VC_538_13 | KT281793                                                                                                                                                                                                                                                                                                                                                                                                                                                                                                                                                                                                                                                                                                                                                                                                                                                                                                                                                                                                    |
| VC_538_14 | MT684595                                                                                                                                                                                                                                                                                                                                                                                                                                                                                                                                                                                                                                                                                                                                                                                                                                                                                                                                                                                                    |
| VC_538_15 | MF668270,MT684593                                                                                                                                                                                                                                                                                                                                                                                                                                                                                                                                                                                                                                                                                                                                                                                                                                                                                                                                                                                           |
| VC_538_16 | KX808131                                                                                                                                                                                                                                                                                                                                                                                                                                                                                                                                                                                                                                                                                                                                                                                                                                                                                                                                                                                                    |
| VC_538_17 | MN369739                                                                                                                                                                                                                                                                                                                                                                                                                                                                                                                                                                                                                                                                                                                                                                                                                                                                                                                                                                                                    |
| VC_538_18 | MN586001                                                                                                                                                                                                                                                                                                                                                                                                                                                                                                                                                                                                                                                                                                                                                                                                                                                                                                                                                                                                    |
| VC_538_19 | KM652553,MN369749                                                                                                                                                                                                                                                                                                                                                                                                                                                                                                                                                                                                                                                                                                                                                                                                                                                                                                                                                                                           |
| VC_538_2  | KR824843                                                                                                                                                                                                                                                                                                                                                                                                                                                                                                                                                                                                                                                                                                                                                                                                                                                                                                                                                                                                    |
| VC_538_20 | JN699012                                                                                                                                                                                                                                                                                                                                                                                                                                                                                                                                                                                                                                                                                                                                                                                                                                                                                                                                                                                                    |
| VC_538_21 | MH669001                                                                                                                                                                                                                                                                                                                                                                                                                                                                                                                                                                                                                                                                                                                                                                                                                                                                                                                                                                                                    |
| VC_538_22 | OP068340                                                                                                                                                                                                                                                                                                                                                                                                                                                                                                                                                                                                                                                                                                                                                                                                                                                                                                                                                                                                    |
| VC_538_23 | JN859129,KF024723                                                                                                                                                                                                                                                                                                                                                                                                                                                                                                                                                                                                                                                                                                                                                                                                                                                                                                                                                                                           |
| VC_538_24 | EF536069                                                                                                                                                                                                                                                                                                                                                                                                                                                                                                                                                                                                                                                                                                                                                                                                                                                                                                                                                                                                    |
| VC_538_25 | MH590598                                                                                                                                                                                                                                                                                                                                                                                                                                                                                                                                                                                                                                                                                                                                                                                                                                                                                                                                                                                                    |
| VC_538_26 | HQ728524,JN698996,JX121091                                                                                                                                                                                                                                                                                                                                                                                                                                                                                                                                                                                                                                                                                                                                                                                                                                                                                                                                                                                  |
| VC_538_27 | KT281792,KY471267                                                                                                                                                                                                                                                                                                                                                                                                                                                                                                                                                                                                                                                                                                                                                                                                                                                                                                                                                                                           |
| VC_538_28 | JN020141,MT114167                                                                                                                                                                                                                                                                                                                                                                                                                                                                                                                                                                                                                                                                                                                                                                                                                                                                                                                                                                                           |
| VC_538_29 | KM597530                                                                                                                                                                                                                                                                                                                                                                                                                                                                                                                                                                                                                                                                                                                                                                                                                                                                                                                                                                                                    |
| VC_538_3  | MF668287                                                                                                                                                                                                                                                                                                                                                                                                                                                                                                                                                                                                                                                                                                                                                                                                                                                                                                                                                                                                    |
| VC_538_30 | MH825707,ON526976                                                                                                                                                                                                                                                                                                                                                                                                                                                                                                                                                                                                                                                                                                                                                                                                                                                                                                                                                                                           |
| VC_538_31 | FI174690,GIU060500,JI937093,KT281795,MH020235,MH077580,MK016494,MN585973,MW924649,MZ681519,OP297536                                                                                                                                                                                                                                                                                                                                                                                                                                                                                                                                                                                                                                                                                                                                                                                                                                                                                                         |
| VC_538_32 | MH651178                                                                                                                                                                                                                                                                                                                                                                                                                                                                                                                                                                                                                                                                                                                                                                                                                                                                                                                                                                                                    |
| VC_538_33 | MH371123,MN369755                                                                                                                                                                                                                                                                                                                                                                                                                                                                                                                                                                                                                                                                                                                                                                                                                                                                                                                                                                                           |
| VC_538_34 | MH077578                                                                                                                                                                                                                                                                                                                                                                                                                                                                                                                                                                                                                                                                                                                                                                                                                                                                                                                                                                                                    |
| VC_538_35 | KR997930,KR997931,KR997968                                                                                                                                                                                                                                                                                                                                                                                                                                                                                                                                                                                                                                                                                                                                                                                                                                                                                                                                                                                  |
| VC_538_36 | MH744415                                                                                                                                                                                                                                                                                                                                                                                                                                                                                                                                                                                                                                                                                                                                                                                                                                                                                                                                                                                                    |
| VC_538_37 | JI937102                                                                                                                                                                                                                                                                                                                                                                                                                                                                                                                                                                                                                                                                                                                                                                                                                                                                                                                                                                                                    |
| VC_538_38 | KJ025956,MH155865,MH155871,MH590602,MK524517,MT310893                                                                                                                                                                                                                                                                                                                                                                                                                                                                                                                                                                                                                                                                                                                                                                                                                                                                                                                                                       |
| VC_538_39 | MH371120                                                                                                                                                                                                                                                                                                                                                                                                                                                                                                                                                                                                                                                                                                                                                                                                                                                                                                                                                                                                    |
| VC_538_4  | MH155866                                                                                                                                                                                                                                                                                                                                                                                                                                                                                                                                                                                                                                                                                                                                                                                                                                                                                                                                                                                                    |
| VC_538_40 | KU865302,KY965064,MH371115,MT553345                                                                                                                                                                                                                                                                                                                                                                                                                                                                                                                                                                                                                                                                                                                                                                                                                                                                                                                                                                         |
| VC_538_41 | MH651183,MN586011                                                                                                                                                                                                                                                                                                                                                                                                                                                                                                                                                                                                                                                                                                                                                                                                                                                                                                                                                                                           |
| VC_538_42 | MH399771                                                                                                                                                                                                                                                                                                                                                                                                                                                                                                                                                                                                                                                                                                                                                                                                                                                                                                                                                                                                    |
| VC_538_43 | JN020143,ON456356,ON970562                                                                                                                                                                                                                                                                                                                                                                                                                                                                                                                                                                                                                                                                                                                                                                                                                                                                                                                                                                                  |
| VC_538_44 | KY348865                                                                                                                                                                                                                                                                                                                                                                                                                                                                                                                                                                                                                                                                                                                                                                                                                                                                                                                                                                                                    |



|           |                                                                                                                                                                                                                                                                                                                                                                                                                                                                                                                                                                                                                                                                                                                                                                                                                |
|-----------|----------------------------------------------------------------------------------------------------------------------------------------------------------------------------------------------------------------------------------------------------------------------------------------------------------------------------------------------------------------------------------------------------------------------------------------------------------------------------------------------------------------------------------------------------------------------------------------------------------------------------------------------------------------------------------------------------------------------------------------------------------------------------------------------------------------|
| VC_538_45 | KT895281,MG872841,MH316564,MH399784,MH651169,MH834617,MK494110                                                                                                                                                                                                                                                                                                                                                                                                                                                                                                                                                                                                                                                                                                                                                 |
| VC_538_46 | MZ274306                                                                                                                                                                                                                                                                                                                                                                                                                                                                                                                                                                                                                                                                                                                                                                                                       |
| VC_538_47 | MT684586                                                                                                                                                                                                                                                                                                                                                                                                                                                                                                                                                                                                                                                                                                                                                                                                       |
| VC_538_48 | MZ171378                                                                                                                                                                                                                                                                                                                                                                                                                                                                                                                                                                                                                                                                                                                                                                                                       |
| VC_538_49 | KM101122                                                                                                                                                                                                                                                                                                                                                                                                                                                                                                                                                                                                                                                                                                                                                                                                       |
| VC_538_5  | MH727548                                                                                                                                                                                                                                                                                                                                                                                                                                                                                                                                                                                                                                                                                                                                                                                                       |
| VC_538_50 | MT897904                                                                                                                                                                                                                                                                                                                                                                                                                                                                                                                                                                                                                                                                                                                                                                                                       |
| VC_538_51 | MH051257                                                                                                                                                                                                                                                                                                                                                                                                                                                                                                                                                                                                                                                                                                                                                                                                       |
| VC_538_52 | KC736071                                                                                                                                                                                                                                                                                                                                                                                                                                                                                                                                                                                                                                                                                                                                                                                                       |
| VC_538_53 | KY385384                                                                                                                                                                                                                                                                                                                                                                                                                                                                                                                                                                                                                                                                                                                                                                                                       |
| VC_538_54 | OM105885                                                                                                                                                                                                                                                                                                                                                                                                                                                                                                                                                                                                                                                                                                                                                                                                       |
| VC_538_55 | OP297542                                                                                                                                                                                                                                                                                                                                                                                                                                                                                                                                                                                                                                                                                                                                                                                                       |
| VC_538_56 | KM279937                                                                                                                                                                                                                                                                                                                                                                                                                                                                                                                                                                                                                                                                                                                                                                                                       |
| VC_538_57 | MK359343                                                                                                                                                                                                                                                                                                                                                                                                                                                                                                                                                                                                                                                                                                                                                                                                       |
| VC_538_58 | DQ398050,EU816590,ON970595                                                                                                                                                                                                                                                                                                                                                                                                                                                                                                                                                                                                                                                                                                                                                                                     |
| VC_538_59 | JN542517,MH001448,MN585987,MN586005,MZ681512                                                                                                                                                                                                                                                                                                                                                                                                                                                                                                                                                                                                                                                                                                                                                                   |
| VC_538_6  | MN586004,MT684597,MT684601                                                                                                                                                                                                                                                                                                                                                                                                                                                                                                                                                                                                                                                                                                                                                                                     |
| VC_538_60 | DQ398045,KT279576                                                                                                                                                                                                                                                                                                                                                                                                                                                                                                                                                                                                                                                                                                                                                                                              |
| VC_538_61 | MW055915                                                                                                                                                                                                                                                                                                                                                                                                                                                                                                                                                                                                                                                                                                                                                                                                       |
| VC_538_62 | ON970566                                                                                                                                                                                                                                                                                                                                                                                                                                                                                                                                                                                                                                                                                                                                                                                                       |
| VC_538_63 | MF919501                                                                                                                                                                                                                                                                                                                                                                                                                                                                                                                                                                                                                                                                                                                                                                                                       |
| VC_538_64 | MG962361                                                                                                                                                                                                                                                                                                                                                                                                                                                                                                                                                                                                                                                                                                                                                                                                       |
| VC_538_65 | MZ747519                                                                                                                                                                                                                                                                                                                                                                                                                                                                                                                                                                                                                                                                                                                                                                                                       |
| VC_538_66 | MN586012                                                                                                                                                                                                                                                                                                                                                                                                                                                                                                                                                                                                                                                                                                                                                                                                       |
| VC_538_67 | ON970610                                                                                                                                                                                                                                                                                                                                                                                                                                                                                                                                                                                                                                                                                                                                                                                                       |
| VC_538_68 | KM347889                                                                                                                                                                                                                                                                                                                                                                                                                                                                                                                                                                                                                                                                                                                                                                                                       |
| VC_538_69 | MH669014                                                                                                                                                                                                                                                                                                                                                                                                                                                                                                                                                                                                                                                                                                                                                                                                       |
| VC_538_7  | MN310548                                                                                                                                                                                                                                                                                                                                                                                                                                                                                                                                                                                                                                                                                                                                                                                                       |
| VC_538_70 | KC661280                                                                                                                                                                                                                                                                                                                                                                                                                                                                                                                                                                                                                                                                                                                                                                                                       |
| VC_538_71 | FJ174693                                                                                                                                                                                                                                                                                                                                                                                                                                                                                                                                                                                                                                                                                                                                                                                                       |
| VC_538_72 | MK494118                                                                                                                                                                                                                                                                                                                                                                                                                                                                                                                                                                                                                                                                                                                                                                                                       |
| VC_538_73 | KR935214,MH669012                                                                                                                                                                                                                                                                                                                                                                                                                                                                                                                                                                                                                                                                                                                                                                                              |
| VC_538_74 | JF704117,MK112556                                                                                                                                                                                                                                                                                                                                                                                                                                                                                                                                                                                                                                                                                                                                                                                              |
| VC_538_75 | MN310544                                                                                                                                                                                                                                                                                                                                                                                                                                                                                                                                                                                                                                                                                                                                                                                                       |
| VC_538_76 | JN398368,MT114164                                                                                                                                                                                                                                                                                                                                                                                                                                                                                                                                                                                                                                                                                                                                                                                              |
| VC_538_77 | JQ300538,KX576644,MK016496                                                                                                                                                                                                                                                                                                                                                                                                                                                                                                                                                                                                                                                                                                                                                                                     |
| VC_538_78 | MH590596,OP297528                                                                                                                                                                                                                                                                                                                                                                                                                                                                                                                                                                                                                                                                                                                                                                                              |
| VC_538_79 | KC661278                                                                                                                                                                                                                                                                                                                                                                                                                                                                                                                                                                                                                                                                                                                                                                                                       |
| VC_538_8  | MZ958744                                                                                                                                                                                                                                                                                                                                                                                                                                                                                                                                                                                                                                                                                                                                                                                                       |
| VC_538_80 | MH651188,MH669003,MK359315                                                                                                                                                                                                                                                                                                                                                                                                                                                                                                                                                                                                                                                                                                                                                                                     |
| VC_538_81 | MF919526                                                                                                                                                                                                                                                                                                                                                                                                                                                                                                                                                                                                                                                                                                                                                                                                       |
| VC_538_82 | MN310545                                                                                                                                                                                                                                                                                                                                                                                                                                                                                                                                                                                                                                                                                                                                                                                                       |
| VC_538_83 | KX610764                                                                                                                                                                                                                                                                                                                                                                                                                                                                                                                                                                                                                                                                                                                                                                                                       |
| VC_538_84 | ON970585                                                                                                                                                                                                                                                                                                                                                                                                                                                                                                                                                                                                                                                                                                                                                                                                       |
| VC_538_85 | KT895280,MN369751                                                                                                                                                                                                                                                                                                                                                                                                                                                                                                                                                                                                                                                                                                                                                                                              |
| VC_538_86 | MZ747512                                                                                                                                                                                                                                                                                                                                                                                                                                                                                                                                                                                                                                                                                                                                                                                                       |
| VC_538_87 | MK524503                                                                                                                                                                                                                                                                                                                                                                                                                                                                                                                                                                                                                                                                                                                                                                                                       |
| VC_538_88 | JN020142                                                                                                                                                                                                                                                                                                                                                                                                                                                                                                                                                                                                                                                                                                                                                                                                       |
| VC_538_89 | MN585975                                                                                                                                                                                                                                                                                                                                                                                                                                                                                                                                                                                                                                                                                                                                                                                                       |
| VC_538_9  | KF114874                                                                                                                                                                                                                                                                                                                                                                                                                                                                                                                                                                                                                                                                                                                                                                                                       |
| VC_538_90 | MK016504                                                                                                                                                                                                                                                                                                                                                                                                                                                                                                                                                                                                                                                                                                                                                                                                       |
| VC_538_91 | MZ209299                                                                                                                                                                                                                                                                                                                                                                                                                                                                                                                                                                                                                                                                                                                                                                                                       |
| VC_538_92 | KM402757,MK359307,MN428051,MT889396,MT889397                                                                                                                                                                                                                                                                                                                                                                                                                                                                                                                                                                                                                                                                                                                                                                   |
| VC_538_93 | JF937098,MH632119                                                                                                                                                                                                                                                                                                                                                                                                                                                                                                                                                                                                                                                                                                                                                                                              |
| VC_538_94 | MK967397                                                                                                                                                                                                                                                                                                                                                                                                                                                                                                                                                                                                                                                                                                                                                                                                       |
| VC_538_95 | MK224592                                                                                                                                                                                                                                                                                                                                                                                                                                                                                                                                                                                                                                                                                                                                                                                                       |
| VC_538_96 | AY129330                                                                                                                                                                                                                                                                                                                                                                                                                                                                                                                                                                                                                                                                                                                                                                                                       |
| VC_538_97 | MG925354                                                                                                                                                                                                                                                                                                                                                                                                                                                                                                                                                                                                                                                                                                                                                                                                       |
| VC_538_98 | MG812488                                                                                                                                                                                                                                                                                                                                                                                                                                                                                                                                                                                                                                                                                                                                                                                                       |
| VC_539_0  | JN256079,JN624851,KC576783,KF986246,KM588359,KU935726,KU935727,KU935728,KU935729,KU935730,KU935731,KX756439,MG099936,MG099948,MH316570,MH399787,MH697576,MH697585,MH697593,MH926055,MK392367,MK524500,MK524509,MK524515,MK524518,MK524520,MK524522,MK524528,MK977708,MT498042,MT498044,MT498048,MT684588,MT723932,MZ622162,OL742561,OP297540                                                                                                                                                                                                                                                                                                                                                                                                                                                                   |
| VC_54_0   | AB259123,AB434711,AB937974,AB981170,KX179905,MF716957,ON170020,ON170023,ON170029,ON170030,ON170034,ON170037,ON170041,ON170050,ON170055,ON170087,ON170089,ON170091,ON170093,ON170095,ON170097,ON170101,ON170103,ON170105,ON170107,ON170109,ON170111,ON170113,ON170115,ON170117,ON170119,ON170121,ON170125,ON170127,ON170132,ON170143,ON170145,ON170147,ON170153,ON170155,ON170157,ON170159,ON170161,ON170163,ON170165,ON170168,ON170193,ON170195,ON170197,ON170199,ON170201,ON170203,ON170205,ON170207,ON170212,ON170216,ON170218,ON170220,ON170223,ON170226,ON170245,ON170247,ON170249,ON170251,ON170253,ON170273,ON170277,ON170281,ON170283,ON170285,ON170290,ON170292,ON170294,ON170296,ON170299,ON170301,ON170308,ON170312,ON170314,ON170316,ON170331,ON170333,ON170335,ON170337,ON170339,ON170341,ON170353 |
| VC_540_0  | KU963256,MN175604,ON645344                                                                                                                                                                                                                                                                                                                                                                                                                                                                                                                                                                                                                                                                                                                                                                                     |
| VC_540_1  | MN428053,MN585966,MT521995,OP297548,OP434457                                                                                                                                                                                                                                                                                                                                                                                                                                                                                                                                                                                                                                                                                                                                                                   |
| VC_541_0  | MK977709                                                                                                                                                                                                                                                                                                                                                                                                                                                                                                                                                                                                                                                                                                                                                                                                       |
| VC_542_0  | MW584176,MW584199                                                                                                                                                                                                                                                                                                                                                                                                                                                                                                                                                                                                                                                                                                                                                                                              |
| VC_542_1  | MW584188                                                                                                                                                                                                                                                                                                                                                                                                                                                                                                                                                                                                                                                                                                                                                                                                       |
| VC_543_0  | KU963255,KU963257,KX557273,KX557287,MH479912,MH479927,MK016492,MK112547,MK801727,MK814755,MK820642,MK857593,MK857596,MK878898,MK919483,MT723938,MT889398,MT952844,MW712717,MW924648,MW924650,MZ171374,MZ274304,OP297546,OP434440                                                                                                                                                                                                                                                                                                                                                                                                                                                                                                                                                                               |
| VC_543_1  | KU963249,KU963263,MK919469,MK967384,MT639650                                                                                                                                                                                                                                                                                                                                                                                                                                                                                                                                                                                                                                                                                                                                                                   |



|           |                                                                                                                                                                                                                                                             |
|-----------|-------------------------------------------------------------------------------------------------------------------------------------------------------------------------------------------------------------------------------------------------------------|
| VC_544_0  | MG557979,MG765277,MG765279,MH809529,MH809530,MH809531                                                                                                                                                                                                       |
| VC_544_1  | MF787246                                                                                                                                                                                                                                                    |
| VC_544_2  | AY682195                                                                                                                                                                                                                                                    |
| VC_544_3  | MKS04444                                                                                                                                                                                                                                                    |
| VC_545_0  | MW202473,MW202478,MW202738                                                                                                                                                                                                                                  |
| VC_546_0  | MW202640,MW202722,OL791268                                                                                                                                                                                                                                  |
| VC_547_0  | MW824391,MW824401                                                                                                                                                                                                                                           |
| VC_548_0  | AP019417,KJ936628,MF431726,MG592626,MK483107,MN062185,MW217515,MW451248,MW748992                                                                                                                                                                            |
| VC_549_0  | KC131129,KP671755,KT919972,KT919973,MK568540,MT612988,MT612989,ON000910,ON190025                                                                                                                                                                            |
| VC_549_1  | AY283928,JN849462,MN794232,MT135026,OK905446,ON190024                                                                                                                                                                                                       |
| VC_549_2  | HQ317393                                                                                                                                                                                                                                                    |
| VC_549_3  | MW824377                                                                                                                                                                                                                                                    |
| VC_549_4  | MG592456                                                                                                                                                                                                                                                    |
| VC_549_5  | MT135025                                                                                                                                                                                                                                                    |
| VC_549_6  | MT135024                                                                                                                                                                                                                                                    |
| VC_55_0   | HM064452,ON170025,ON170069,ON170139,ON170320                                                                                                                                                                                                                |
| VC_550_0  | AP019524,AP019525                                                                                                                                                                                                                                           |
| VC_550_1  | LC168164                                                                                                                                                                                                                                                    |
| VC_551_0  | LR756501,LR756503                                                                                                                                                                                                                                           |
| VC_551_1  | LR745206                                                                                                                                                                                                                                                    |
| VC_551_2  | LR756502                                                                                                                                                                                                                                                    |
| VC_551_3  | LR756504                                                                                                                                                                                                                                                    |
| VC_552_0  | AP019527,FF429185,KY554762,KY554763,KY554764,KY554765,KY554766,KY554767,MN528768                                                                                                                                                                            |
| VC_553_0  | EF153632,MT708549,MW460246                                                                                                                                                                                                                                  |
| VC_559_0  | AY048850,BK013337,BK013338                                                                                                                                                                                                                                  |
| VC_56_0   | AB259124,AB828698,AB931172,IQ408219,LC066596,MT495635                                                                                                                                                                                                       |
| VC_561_0  | AY082070,JQ660954,MW478290                                                                                                                                                                                                                                  |
| VC_563_0  | MG592399,MG592418,MG592419,MG592510,MG592511,MG592579                                                                                                                                                                                                       |
| VC_564_0  | MG592447,MG592453                                                                                                                                                                                                                                           |
| VC_566_0  | JN201525,MH399772                                                                                                                                                                                                                                           |
| VC_566_1  | MN586029,MW314846                                                                                                                                                                                                                                           |
| VC_566_10 | AY129338                                                                                                                                                                                                                                                    |
| VC_566_11 | JF937101                                                                                                                                                                                                                                                    |
| VC_566_2  | JN698997,KM400683,MF919534                                                                                                                                                                                                                                  |
| VC_566_3  | KM925136,MF072690,MF133445,MF668284                                                                                                                                                                                                                         |
| VC_566_4  | KF114875,MH077579,MH669017,MH697582,MH697583,MH727551,MK524504,MK524521,MK524527,MK524529,MK967379,MK967402,MN062701,MN183286,MZ622169,MZ958748                                                                                                             |
| VC_566_5  | MF919504                                                                                                                                                                                                                                                    |
| VC_566_6  | KF006818,MF919512                                                                                                                                                                                                                                           |
| VC_566_7  | JF937090,JF957059,KM101123,MK279849                                                                                                                                                                                                                         |
| VC_566_8  | MW132714                                                                                                                                                                                                                                                    |
| VC_566_9  | MKS24516                                                                                                                                                                                                                                                    |
| VC_57_0   | CP006891,CP023680,CP023686                                                                                                                                                                                                                                  |
| VC_570_0  | MW314855,MW314856,MW314858,MW584152,MW584158,MW584161,MW584164,MW584171,MW584179,MW584180,MW584196,MW584204                                                                                                                                                 |
| VC_571_0  | JF937091,JF937106,MG872831,MG872832,MG872843,MH399774,MH399778,MH536820,MK016502,MK359320,MK801726,MK937593,MN096361,MN586013,MT723943,MW291023                                                                                                             |
| VC_571_1  | MF919541,MH576956,MN586043,MN586044                                                                                                                                                                                                                         |
| VC_571_2  | EU816591,JF937096,JN006061,JN006062,KF188414,KR080204,KT222941,KT222942,KU865303,KX817173,KY319168,MH513972,MH513978,MN586032,MN586051,MT114165,MZ2274305                                                                                                   |
| VC_571_3  | KF306380                                                                                                                                                                                                                                                    |
| VC_571_4  | JN412590,KF416343                                                                                                                                                                                                                                           |
| VC_571_5  | MK016491,MK016498                                                                                                                                                                                                                                           |
| VC_571_6  | EU816588,KX611831,KX834009,MG757160,MG872837,MH371112,MH513983,MH536829,MH651174,MH669002,MH727557,MH779503,MK559429,MN428059,MN586034,MN586037,MT952854,MZ622157,MZ681505,OL742559,ON970597,ON970600                                                       |
| VC_571_7  | AY129331,DQ398041,GQ303265,JN382248,JN391441,KC661277,KC691255,KC748971,KF279417,KT020852,KT373978,KY549152,MF668277,MH000607,MH536827,MH576953,MK359309,MK620893,MK757445,MN586017,MN586019,MN586035,MN586041,MN586050,MZ322024,MZ622158,MZ622163,ON456345 |
| VC_571_8  | KC748969,KF024732,KF493883,KF562099,KF562100,KF562101,KF562102,MF919506,MF919524,MF919525,MF919529,MF919535,MF919540,MG099953,MH020247,MH590587,MK433262,MN096364,MT522005                                                                                  |
| VC_574_0  | JN698994,MPU46938                                                                                                                                                                                                                                           |
| VC_575_0  | MW314852,MW584148,MW584150,MW584154,MW584156,MW584162,MW584163,MW584181,MW584182,MW584192,MW584203,MW584208,MW584212                                                                                                                                        |
| VC_577_0  | AY129335,JN698993,KF017002,KF024730,KJ829260,KT281796,MG099943,MG872838,MH020246,MH590592,MH926062,MN428052,MN428058,MN585964,MT818418,MT818425,MW314845,MW712737,MZ209306,MZ747511,ON260829                                                                |
| VC_578_0  | MK937597,MN096370,OP434458                                                                                                                                                                                                                                  |
| VC_578_1  | MG099939,MH651176,MH651185,MH779504,MK279906,MK376961,MK814752,MZ388553,MZ747510,ON456334,ON526981                                                                                                                                                          |
| VC_578_2  | MH536812                                                                                                                                                                                                                                                    |
| VC_578_3  | MW534375                                                                                                                                                                                                                                                    |
| VC_579_0  | JN204348,JN412592                                                                                                                                                                                                                                           |
| VC_579_1  | GQ303260,MT553335                                                                                                                                                                                                                                           |
| VC_579_10 | MK112534                                                                                                                                                                                                                                                    |
| VC_579_11 | KT281790,MT889395                                                                                                                                                                                                                                           |
| VC_579_12 | KC748970,MH825697,MK359348                                                                                                                                                                                                                                  |
| VC_579_13 | MK359321                                                                                                                                                                                                                                                    |
| VC_579_14 | MG872839,MH316561,MK359303,MK359311,MK359358,MK450427,ON526982,ON637768                                                                                                                                                                                     |
| VC_579_15 | MK359342                                                                                                                                                                                                                                                    |
| VC_579_16 | ON755189                                                                                                                                                                                                                                                    |
| VC_579_17 | MK359328                                                                                                                                                                                                                                                    |
| VC_579_18 | MN183285                                                                                                                                                                                                                                                    |
| VC_579_19 | ON637764                                                                                                                                                                                                                                                    |



|           |                                                                                                                                                          |
|-----------|----------------------------------------------------------------------------------------------------------------------------------------------------------|
| VC_579_2  | EU826471,MH727543                                                                                                                                        |
| VC_579_20 | JF704096,KR080196,MF919493,MH697586,MH697590,MK359326,MK359335,MK359338,MK359339,MK359347,MK359362,MK450432,MN428066,MZ028626,MZ681511,ON081335,ON260824 |
| VC_579_21 | MT723945                                                                                                                                                 |
| VC_579_22 | JF704092,MH590593,MK450423,MZ958745                                                                                                                      |
| VC_579_23 | KX369583                                                                                                                                                 |
| VC_579_24 | OP021681                                                                                                                                                 |
| VC_579_25 | EU826468                                                                                                                                                 |
| VC_579_26 | EU826469                                                                                                                                                 |
| VC_579_27 | MK359361,MW712729                                                                                                                                        |
| VC_579_28 | MK359333                                                                                                                                                 |
| VC_579_29 | MT818416                                                                                                                                                 |
| VC_579_3  | MK359355                                                                                                                                                 |
| VC_579_30 | EU826467,JN699625,MK359344                                                                                                                               |
| VC_579_31 | DQ398053                                                                                                                                                 |
| VC_579_32 | MK310143                                                                                                                                                 |
| VC_579_33 | MH910040                                                                                                                                                 |
| VC_579_34 | MK112549                                                                                                                                                 |
| VC_579_35 | MT818423                                                                                                                                                 |
| VC_579_36 | MK359336,MK359363,MK359366,MN234193                                                                                                                      |
| VC_579_37 | KT365400                                                                                                                                                 |
| VC_579_38 | MK878897,MN428065                                                                                                                                        |
| VC_579_39 | MK359364,MT723944,OP297534                                                                                                                               |
| VC_579_4  | MK359353                                                                                                                                                 |
| VC_579_40 | MN276192                                                                                                                                                 |
| VC_579_41 | MK450424                                                                                                                                                 |
| VC_579_42 | MZ856343                                                                                                                                                 |
| VC_579_43 | MK359337                                                                                                                                                 |
| VC_579_44 | MK359345                                                                                                                                                 |
| VC_579_45 | MK359327                                                                                                                                                 |
| VC_579_46 | MK359349                                                                                                                                                 |
| VC_579_47 | MK112541,MK112545,MK112548                                                                                                                               |
| VC_579_48 | KF024734,KX721256                                                                                                                                        |
| VC_579_49 | JN624850,KC748968,KX721255,MH779498,MK112554,MK359334,OP068341                                                                                           |
| VC_579_5  | KC691257                                                                                                                                                 |
| VC_579_50 | JQ911768,KJ595575,KM881426,KT321476,MF919499,MH051266,MH316567,MH669008,MH825713,MK359314,MK359365,MK450429,MK450434,OK040789,OP021684                   |
| VC_579_51 | MK112533                                                                                                                                                 |
| VC_579_52 | MH744422                                                                                                                                                 |
| VC_579_53 | MK359306                                                                                                                                                 |
| VC_579_54 | MH779502                                                                                                                                                 |
| VC_579_55 | MF919494                                                                                                                                                 |
| VC_579_56 | MH727558                                                                                                                                                 |
| VC_579_57 | MK450425                                                                                                                                                 |
| VC_579_58 | MZ388551                                                                                                                                                 |
| VC_579_59 | MK359317                                                                                                                                                 |
| VC_579_6  | JF704116,KT365398                                                                                                                                        |
| VC_579_60 | MN183280                                                                                                                                                 |
| VC_579_61 | MH051260,MK359318                                                                                                                                        |
| VC_579_62 | MK359305                                                                                                                                                 |
| VC_579_63 | JN699626                                                                                                                                                 |
| VC_579_64 | MK359350                                                                                                                                                 |
| VC_579_65 | MK450422,MW291012                                                                                                                                        |
| VC_579_66 | MK359330                                                                                                                                                 |
| VC_579_67 | OP021682                                                                                                                                                 |
| VC_579_68 | MG812494                                                                                                                                                 |
| VC_579_69 | MK359329                                                                                                                                                 |
| VC_579_7  | MH051261                                                                                                                                                 |
| VC_579_70 | ON456344                                                                                                                                                 |
| VC_579_71 | MK359346                                                                                                                                                 |
| VC_579_72 | MG812493                                                                                                                                                 |
| VC_579_73 | MH697579,MK359359                                                                                                                                        |
| VC_579_74 | MF919495                                                                                                                                                 |
| VC_579_75 | ON551388                                                                                                                                                 |
| VC_579_76 | MW822148                                                                                                                                                 |
| VC_579_77 | MF919513,MK359308,MN062707                                                                                                                               |
| VC_579_78 | JN699627                                                                                                                                                 |
| VC_579_79 | MN735434                                                                                                                                                 |
| VC_579_8  | AY129337,JN699013                                                                                                                                        |
| VC_579_80 | JN412588                                                                                                                                                 |
| VC_579_81 | KX752698                                                                                                                                                 |
| VC_579_82 | GQ303262,KX831080,MF919527                                                                                                                               |
| VC_579_9  | KF006817,KX781992,MK359324                                                                                                                               |
| VC_580_0  | EU826466,MF668280                                                                                                                                        |



VC\_580\_1 MZ820085  
VC\_583\_0 KJ567043,MK016501  
VC\_584\_0 MW584155,MW584175,MW584201  
VC\_585\_0 DQ398047,DQ398051,EU676000,FJ168660,FJ168661,FJ168662,JF937107,JN699014,KJ194582,MH025888,MH316562,MH399788,MH834615,MK494102,MK524498,MK559427,MN119378,MN234227,MN284908,MT889385  
VC\_586\_0 AY129339,MK279909  
VC\_587\_0 EU770222,FJ174691,KF986247,KJ567046,MG962376,MH509445,MN010756,MT521996  
VC\_588\_0 JF7041112,KF416342,KT591076,KY969628,MH001447,MH926059,MK757446,MT684602  
VC\_589\_0 JN412589,KR997933,ON108649  
VC\_59\_0 ON470596,ON470604,ON470624,ON470627  
VC\_590\_0 KX557285,MH025890,MH271313,MH576972,MT639639,MT771345,MT771348,MZ171372,ON970620  
VC\_591\_0 MG757156,MH834613,MN585993,MT776806  
VC\_592\_0 MN234162,MN234190,MN234207,MN234220,MN234232,MN586003,MZ005671,OL455887,OL455890,OL455895,ON755185,ON755187,ON970611,OP172868,OP172870,OP172876  
VC\_593\_0 MN813687,ON108643  
VC\_594\_0 JX901189,KF024728,MK279840,MW460248,MZ152914,OM793623,ON108645  
VC\_595\_0 AY216660,HM035024,JX912252,KP085586,KU194205,KU194206,KX828710,KY985004,LC516895,MF093736,MF468274,MG049919,MH051911,MH051912,MH285980,MH917278,MK213796,MK335533,MK972831,MN153797,MN296515,MN337573,MN342247,MN393473,MT427400,MT682715,MZ501092,OL770108,OL800706,OL960578,OL960579,OL960582,ON185577,OP094641,OP455115  
VC\_596\_0 MF996376,MH051918,MT023084,MZ501053  
VC\_597\_0 AY236756,JN051154,JX486087,MG765275,MG765278,MH809528  
VC\_598\_0 MC020111,MK504442  
VC\_599\_0 KC954775,OM638103  
VC\_6\_0 AY319521,CP019275,CP025900,HM770079,KT630647,KY271398,MK416009,MK416011,MK416012,MK416020,MK422449,MK422453,MK422454,MK433577,MK433578,MK433580,MK433581,MK433582,OK490395,OK490397,OK490399,OK490401,OK490403,OK490405,OK490407,OK490411,OK490413,OK490418,OK490423,OK490425,OK490427,OK490429,OK490431,OK490434,OK490436,OK490439,OK490442,OK490445,OK490448,OK490452,OK490455,OK490457,ON470620,OV696611  
VC\_600\_0 MW805361  
VC\_600\_1 OM982621  
VC\_601\_0 MN184887,MN732867,OP480062,OP480063  
VC\_601\_1 OK136180,OK181858,OK181861  
VC\_601\_2 KM190144  
VC\_601\_3 KT934943,KX452695,KY652726,MG250486,MK024806,MT178275,MT438396,MT939253,MZ602147,ON602729,ON602736,OP296941  
VC\_601\_4 JN882284,KF550303,MZ311864  
VC\_601\_5 GU070616,JX181824,MW006477,MZ326168  
VC\_601\_6 MG969411  
VC\_603\_0 AY308796,KM236241,KX015770,KX015771,KY657202,KY694971,LR597656,MG241338,MH102284,MH491968,MH729819,MN994500,MT478992,MW021748,MW021750,MW598258,MZ501059,OK499973,OK499984,OL539443,OL539444,OL539461,OL539462,OL539465,OL539466,ON843697,OP292673,OP292674,OP292675,OP292676,OP292677,OP292678,OP292679,OP292680,OP292681,OP292682,OP292683,OP292684,OP292685,OP292686,OP292687,OP292688,OP292689,OP292690,OP292691,OP292692,OP292693,OP292694,OP292695,OP292696,OP292697,OP292698,OP292699,OP292700,OP292701,OP292702,OP292703,OP292704,OP292705,OP292706,OP292707,OP292708,OP292709,OP292710,OP292711,OP292712,OP292713,OP292714,OP292715,OP292716,OP292717,OP292718,OP292719,OP292720,OP292721,OP292722,OP292723,OP292724,OP292725,OP292726,OP292727,OP292728,OP292729,OP292730,OP292731,OP292732,OP292733,OP292734,OP292735,OP292736,OP292737,OP292738,OP292739,OP292740,OP292741,OP292742,OP292743,OP292744,OP292745,OP292746,OP292747,OP292748,OP292749,OP292750,OP292751,OP292752,OP292753,OP292754,OP292755,OP292756,OP292757,OP292758,OP292759,OP292760,OP292761,OP292762,OP292763,OP292764,OP292765,OP292766,OP292767,OP292768,OP292769,OP292770,OP292771,OP292772,OP292773,OP292774,OP292775,OP292776,OP292777,OP292778,OP292779,OP292780,OP292781,OP292782,OP292783,OP292784,OP292785,OP292786,OP292787,OP292788,OP292789,OP292790,OP292791,OP292792,OP292793,OP292794,OP292795,OP292796,OP292797,OP292798,OP292799,OP292800,OP292801,OP292802,OP292803,OP292804,OP292805,OP292806,OP292807,OP292808,OP292809,OP292810,OP292811,OP292812,OP292813,OP292814,OP292815,OP292816,OP292817,OP292818,OP292819,OP292820,OP292821,OP292822,OP292823,OP292824,OP292825,OP292826,OP292827,OP292828,OP292829,OP292830,OP292831,OP292832,OP292833,OP292834,OP292835,OP292836,OP292837,OP292838,OP292839,OP292840,OP292841,OP292842,OP292843,OP292844,OP292845,OP292846,OP292847,OP292848,OP292849,OP292850,OP292851,OP292852,OP292853,OP292854,OP292855,OP292856,OP292857,OP292858,OP292859,OP292860,OP292861,OP292862,OP292863,OP292864,OP292865,OP292866,OP292867,OP292868,OP292869,OP292870,OP292871,OP292872,OP292873,OP292874,OP292875,OP292876,OP292877,OP292878,OP292879,OP292880,OP292881,OP292882,OP292883,OP292884,OP292885,OP292886,OP292887,OP292888,OP292889,OP292890,OP292891,OP292892,OP292893,OP292894,OP292895,OP292896,OP292897,OP292898,OP292899,OP292900,OP292901,OP292902,OP292903,OP292904,OP292905,OP292906,OP292907,OP292908,OP292909,OP292910,OP292911,OP292912,OP292913,OP292914,OP292915,OP292916,OP292917,OP292918,OP292919,OP292920,OP292921,OP292922,OP292923,OP292924,OP292925,OP292926,OP292927,OP292928,OP292929,OP292930,OP292931,OP292932,OP292933,OP292934,OP292935,OP292936,OP292937,OP292938,OP292939,OP292940,OP292941,OP292942,OP292943,OP292944,OP292945,OP292946,OP292947,OP292948,OP292949,OP292950,OP292951,OP292952,OP292953,OP292954,OP292955,OP292956,OP292957,OP292958,OP292959,OP292960,OP292961,OP292962,OP292963,OP292964,OP292965,OP292966,OP292967,OP292968,OP292969,OP292970,OP292971,OP292972,OP292973,OP292974,OP292975,OP292976,OP292977,OP292978,OP292979,OP292980,OP292981,OP292982,OP292983,OP292984,OP292985,OP292986,OP292987,OP292988,OP292989,OP292990,OP292991,OP292992,OP292993,OP292994,OP292995,OP292996,OP292997,OP292998,OP292999,OP293000,OP293001,OP293002,OP293003,OP293004,OP293005,OP293006,OP293007,OP293008,OP293009,OP293010,OP293011,OP293012,OP293013,OP293014,OP293015,OP293016,OP293017,OP293018,OP293019,OP293020,OP293021,OP293022,OP293023,OP293024,OP293025,OP293026,OP293027,OP293028,OP293029,OP293030,OP293031,OP293032,OP293033,OP293034,OP293035,OP293036,OP293037,OP293038,OP293039,OP293040,OP293041,OP293042,OP293043,OP293044,OP293045,OP293046,OP293047,OP293048,OP293049,OP293050,OP293051,OP293052,OP293053,OP293054,OP293055,OP293056,OP293057,OP293058,OP293059,OP293060,OP293061,OP293062,OP293063,OP293064,OP293065,OP293066,OP293067,OP293068,OP293069,OP293070,OP293071,OP293072,OP293073,OP293074,OP293075,OP293076,OP293077,OP293078,OP293079,OP293080,OP293081,OP293082,OP293083,OP293084,OP293085,OP293086,OP293087,OP293088,OP293089,OP293090,OP293091,OP293092,OP293093,OP293094,OP293095,OP293096,OP293097,OP293098,OP293099,OP293100,OP293101,OP293102,OP293103,OP293104,OP293105,OP293106,OP293107,OP293108,OP293109,OP293110,OP293111,OP293112,OP293113,OP293114,OP293115,OP293116,OP293117,OP293118,OP293119,OP293120,OP293121,OP293122,OP293123,OP293124,OP293125,OP293126,OP293127,OP293128,OP293129,OP293130,OP293131,OP293132,OP293133,OP293134,OP293135,OP293136,OP293137,OP293138,OP293139,OP293140,OP293141,OP293142,OP293143,OP293144,OP293145,OP293146,OP293147,OP293148,OP293149,OP293150,OP293151,OP293152,OP293153,OP293154,OP293155,OP293156,OP293157,OP293158,OP293159,OP293160,OP293161,OP293162,OP293163,OP293164,OP293165,OP293166,OP293167,OP293168,OP293169,OP293170,OP293171,OP293172,OP293173,OP293174,OP293175,OP293176,OP293177,OP293178,OP293179,OP293180,OP293181,OP293182,OP293183,OP293184,OP293185,OP293186,OP293187,OP293188,OP293189,OP293190,OP293191,OP293192,OP293193,OP293194,OP293195,OP293196,OP293197,OP293198,OP293199,OP293200,OP293201,OP293202,OP293203,OP293204,OP293205,OP293206,OP293207,OP293208,OP293209,OP293210,OP293211,OP293212,OP293213,OP293214,OP293215,OP293216,OP293217,OP293218,OP293219,OP293220,OP293221,OP293222,OP293223,OP293224,OP293225,OP293226,OP293227,OP293228,OP293229,OP293230,OP293231,OP293232,OP293233,OP293234,OP293235,OP293236,OP293237,OP293238,OP293239,OP293240,OP293241,OP293242,OP293243,OP293244,OP293245,OP293246,OP293247,OP293248,OP293249,OP293250,OP293251,OP293252,OP293253,OP293254,OP293255,OP293256,OP293257,OP293258,OP293259,OP293260,OP293261,OP293262,OP293263,OP293264,OP293265,OP293266,OP293267,OP293268,OP293269,OP293270,OP293271,OP293272,OP293273,OP293274,OP293275,OP293276,OP293277,OP293278,OP293279,OP293280,OP293281,OP293282,OP293283,OP293284,OP293285,OP293286,OP293287,OP293288,OP293289,OP293290,OP293291,OP293292,OP293293,OP293294,OP293295,OP293296,OP293297,OP293298,OP293299,OP293300,OP293301,OP293302,OP293303,OP293304,OP293305,OP293306,OP293307,OP293308,OP293309,OP293310,OP293311,OP293312,OP293313,OP293314,OP293315,OP293316,OP293317,OP293318,OP293319,OP293320,OP293321,OP293322,OP293323,OP293324,OP293325,OP293326,OP293327,OP293328,OP293329,OP293330,OP293331,OP293332,OP293333,OP293334,OP293335,OP293336,OP293337,OP293338,OP293339,OP293340,OP293341,OP293342,OP293343,OP293344,OP293345,OP293346,OP293347,OP293348,OP293349,OP293350,OP293351,OP293352,OP293353,OP293354,OP293355,OP293356,OP293357,OP293358,OP293359,OP293360,OP293361,OP293362,OP293363,OP293364,OP293365,OP293366,OP293367,OP293368,OP293369,OP293370,OP293371,OP293372,OP293373,OP293374,OP293375,OP293376,OP293377,OP293378,OP293379,OP293380,OP293381,OP293382,OP293383,OP293384,OP293385,OP293386,OP293387,OP293388,OP293389,OP293390,OP293391,OP293392,OP293393,OP293394,OP293395,OP293396,OP293397,OP293398,OP293399,OP293400,OP293401,OP293402,OP293403,OP293404,OP293405,OP293406,OP293407,OP293408,OP293409,OP293410,OP293411,OP293412,OP293413,OP293414,OP293415,OP293416,OP293417,OP293418,OP293419,OP293420,OP293421,OP293422,OP293423,OP293424,OP293425,OP293426,OP293427,OP293428,OP293429,OP293430,OP293431,OP293432,OP293433,OP293434,OP293435,OP293436,OP293437,OP293438,OP293439,OP293440,OP293441,OP293442,OP293443,OP293444,OP293445,OP293446,OP293447,OP293448,OP293449,OP293450,OP293451,OP293452,OP293453,OP293454,OP293455,OP293456,OP293457,OP293458,OP293459,OP293460,OP293461,OP293462,OP293463,OP293464,OP293465,OP293466,OP293467,OP293468,OP293469,OP293470,OP293471,OP293472,OP293473,OP293474,OP293475,OP293476,OP293477,OP293478,OP293479,OP293480,OP293481,OP293482,OP293483,OP293484,OP293485,OP293486,OP293487,OP293488,OP293489,OP293490,OP293491,OP293492,OP293493,OP293494,OP293495,OP293496,OP293497,OP293498,OP293499,OP293500,OP293501,OP293502,OP293503,OP293504,OP293505,OP293506,OP293507,OP293508,OP293509,OP293510,OP293511,OP293512,OP293513,OP293514,OP293515,OP293516,OP293517,OP293518,OP293519,OP293520,OP293521,OP293522,OP293523,OP293524,OP293525,OP293526,OP293527,OP293528,OP293529,OP293530,OP293531,OP293532,OP293533,OP293534,OP293535,OP293536,OP293537,OP293538,OP293539,OP293540,OP293541,OP293542,OP293543,OP293544,OP293545,OP293546,OP293547,OP293548,OP293549,OP293550,OP293551,OP293552,OP293553,OP293554,OP293555,OP293556,OP293557,OP293558,OP293559,OP293560,OP293561,OP293562,OP293563,OP293564,OP293565,OP293566,OP293567,OP293568,OP293569,OP293570,OP293571,OP293572,OP293573,OP293574,OP293575,OP293576,OP293577,OP293578,OP293579,OP293580,OP293581,OP293582,OP293583,OP293584,OP293585,OP293586,OP293587,OP293588,OP293589,OP293590,OP293591,OP293592,OP293593,OP293594,OP293595,OP293596,OP293597,OP293598,OP293599,OP293600,OP293601,OP293602,OP293603,OP293604,OP293605,OP293606,OP293607,OP293608,OP293609,OP293610,OP293611,OP293612,OP293613,OP293614,OP293615,OP293616,OP293617,OP293618,OP293619,OP293620,OP293621,OP293622,OP293623,OP293624,OP293625,OP293626,OP293627,OP293628,OP293629,OP293630,OP293631,OP293632,OP293633,OP293634,OP293635,OP293636,OP293637,OP293638,OP293639,OP293640,OP293641,OP293642,OP293643,OP293644,OP293645,OP293646,OP293647,OP293648,OP293649,OP293650,OP293651,OP293652,OP293653,OP293654,OP293655,OP293656,OP293657,OP293658,OP293659,OP293660,OP293661,OP293662,OP293663,OP293664,OP293665,OP293666,OP293667,OP293668,OP293669,OP293670,OP293671,OP293672,OP293673,OP293674,OP293675,OP293676,OP293677,OP293678,OP293679,OP293680,OP293681,OP293682,OP293683,OP293684,OP293685,OP293686,OP293687,OP293688,OP293689,OP293690,OP293691,OP293692,OP293693,OP293694,OP293695,OP293696,OP293697,OP293698,OP293699,OP293700,OP293701,OP293702,OP293703,OP293704,OP293705,OP293706,OP293707,OP293708,OP293709,OP293710,OP293711,OP293712,OP293713,OP293714,OP293715,OP293716,OP293717,OP293718,OP293719,OP293720,OP293721,OP293722,OP293723,OP293724,OP293725,OP293726,OP293727,OP293728,OP293729,OP293730,OP293731,OP293732,OP293733,OP293734,OP293735,OP293736,OP293737,OP293738,OP293739,OP293740,OP293741,OP293742,OP293743,OP293744,OP293745,OP293746,OP293747,OP293748,OP293749,OP293750,OP293751,OP293752,OP293753,OP293754,OP293755,OP293756,OP293757,OP293758,OP293759,OP293760,OP293761,OP293762,OP293763,OP293764,OP293765,OP293766,OP293767,OP293768,OP293769,OP293770,OP293771,OP293772,OP293773,OP293774,OP293775,OP293776,OP293777,OP293778,OP293779,OP293780,OP293781,OP293782,OP293783,OP293784,OP293785,OP293786,OP293787,OP293788,OP293789,OP293790,OP293791,OP293792,OP293793,OP293794,OP293795,OP293796,OP293797,OP293798,OP293799,OP293800,OP293801,OP293802,OP293803,OP293804,OP293805,OP293806,OP293807,OP293808,OP293809,OP293810,OP293811,OP293812,OP293813,OP293814,OP293815,OP293816,OP293817,OP293818,OP293819,OP293820,OP293821,OP293822,OP293823,OP293824,OP293825,OP293826,OP293827,OP293828,OP293829,OP293830,OP293831,OP293832,OP293833,OP293834,OP293835,OP293836,OP293837,OP293838,OP293839,OP293840,OP293841,OP293842,OP293843,OP293844,OP293845,OP293846,OP293847,OP293848,OP293849,OP293850,OP293851,OP293852,OP293853,OP293854,OP293855,OP293856,OP293857,OP293858,OP293859,OP293860,OP293861,OP293862,OP293863,OP293864,OP293865,OP293866,OP293867,OP293868,OP293869,OP293870,OP293871,OP293872,OP293873,OP293874,OP293875,OP293876,OP293877,OP293878,OP293879,OP293880,OP293881,OP293882,OP293883,OP293884,OP293885,OP293886,OP293887,OP293888,OP293889,OP293890,OP293891,OP293892,OP293893,OP293894,OP293895,OP293896,OP293897,OP293898,OP293899,OP293900,OP293901,OP293902,OP293903,OP293904,OP293905,OP293906,OP293907,OP293908,OP293909,OP293910,OP293911,OP293912,OP293913,OP293914,OP293915,OP293916,OP293917,OP293918,OP293919,OP293920,OP293921,OP293922,OP293923,OP293924,OP293925,OP293926,OP293927,OP293928,OP293929,OP293930,OP293931,OP293932,OP293933,OP293934,OP293935,OP293936,OP293937,OP293938,OP293939,OP293940,OP293941,OP293942,OP293943,OP293944,OP293945,OP293946,OP293947,OP293948,OP



|          |                                                                                                                                                                                                                                                                                                                                                                                                                                                                                                                                                                                                                                                                                                                                                                                                                                                                                                                                                                                                                                                                                                                                                                                     |
|----------|-------------------------------------------------------------------------------------------------------------------------------------------------------------------------------------------------------------------------------------------------------------------------------------------------------------------------------------------------------------------------------------------------------------------------------------------------------------------------------------------------------------------------------------------------------------------------------------------------------------------------------------------------------------------------------------------------------------------------------------------------------------------------------------------------------------------------------------------------------------------------------------------------------------------------------------------------------------------------------------------------------------------------------------------------------------------------------------------------------------------------------------------------------------------------------------|
| VC_647_0 | FM864213, FN997652, KC48603, KC581799, KT336320, KT336321, KX077896, MK359990, MK448674, MK448741, MK448752, MK448811, MK448819, MK448828, MK448983, MN270258, MN270259, MN270260, MN270261, MN270262, MN270263, MN270264, MN270265, MN270266, MN270267, MN270268, MN270269, MN270270, MN270271, MN270272, MN270273, MN270274, MN270275, MN270276, MN270277, MN270278, MN270279                                                                                                                                                                                                                                                                                                                                                                                                                                                                                                                                                                                                                                                                                                                                                                                                     |
| VC_65_0  | JN022534, MK798143, MK798144                                                                                                                                                                                                                                                                                                                                                                                                                                                                                                                                                                                                                                                                                                                                                                                                                                                                                                                                                                                                                                                                                                                                                        |
| VC_650_0 | KU052488, MG252693, MG765276                                                                                                                                                                                                                                                                                                                                                                                                                                                                                                                                                                                                                                                                                                                                                                                                                                                                                                                                                                                                                                                                                                                                                        |
| VC_650_1 | JX486088, KX223815, KY381600, MG744354, MG765274, ON117106                                                                                                                                                                                                                                                                                                                                                                                                                                                                                                                                                                                                                                                                                                                                                                                                                                                                                                                                                                                                                                                                                                                          |
| VC_653_0 | KM289195, MK448681, MK448683, MK448783, MK448790, MK448798, MK448833, MK448967, MK449010                                                                                                                                                                                                                                                                                                                                                                                                                                                                                                                                                                                                                                                                                                                                                                                                                                                                                                                                                                                                                                                                                            |
| VC_654_0 | AY730274, EF177456, HE775250, HG934469, HG934470, JQ007353, JX202565, KC139511, KR270151, KT881477, KT962832, KU595434, KU951146, KU951147, KX245013, KX405002, KX649889, KY379853, KY626163, LC507823, MF001356, MF001366, MF431252, MG646668, MC969408, MC969409, MC969410, MH358359, MH370358, MH370359, MH370360, MH370361, MH370362, MH370365, MH370372, MH370373, MH370374, MH370381, MH370384, MH370385, MH424443, MH424445, MH992509, MK249126, MK761195, MK761196, MK761197, MK761198, MK761199, MK770409, MK972691, MK972700, MK972701, MK972702, MK972703, MK972705, MK972706, MN336264, MN336266, MN336266, MN393078, MN722429, MN850616, MT074431, MT074432, MT074451, MT074462, MT074473, MT074481, MT074482, MT074483, MT074484, MT588083, MT632017, MT632018, MT632019, MT632020, MT653137, MT653144, MT677934, MT740291, MW201959, MW355463, MW355464, MW355465, MW715619, MW790495, MZ156567, MZ156568, MZ156569, MZ2274225, MZ955866, OK108608, OK108609, OK143508, OL436139, OL519843, OL652658, OL770276, OM210019, OM291373, OM339548, ON167532, ON381768, ON409568, ON409569, ON409570, ON454038, ON526838, ON540301, ON720977, ON996339, OP484850, OP494211 |
| VC_654_1 | JX297445, KF562864, KF562865, KY176369, MK578530, MK759883, MK931446, MT074430, MT677933, MW355451, MW355452, MW355453, MW355454, MW355455, MW355456, MW355457, MW355458, MW355459, MW355461, MW355462, MW355466, MW355468, MW355469, MW355471, MW355472, MW355473, OK169616                                                                                                                                                                                                                                                                                                                                                                                                                                                                                                                                                                                                                                                                                                                                                                                                                                                                                                        |
| VC_654_2 | KF148055, KM272358                                                                                                                                                                                                                                                                                                                                                                                                                                                                                                                                                                                                                                                                                                                                                                                                                                                                                                                                                                                                                                                                                                                                                                  |
| VC_655_0 | GU196277, GU196278, GU196279, GU196280, GU196281, KY295895, KY295896, KY295898, MF153391, MG099933, MG252615, MG852086, MH051334, MK542015, MK737937, MK931438, MK931439, MK931440, MK931441, MN927225, MN927226, MT711523, MT711524, MT711525, MT711526, MT711527, MT711528, MW331437, MW722821, MZ234010, MZ234048, MZ576217, MZ576218, MZ832314, MZ997838, OK539620, OL539727, OM272052, OM632667, OM632668, OM810255, ON001686, ON391668, ON548432, ON556632                                                                                                                                                                                                                                                                                                                                                                                                                                                                                                                                                                                                                                                                                                                    |
| VC_656_0 | MK813940, OM033133                                                                                                                                                                                                                                                                                                                                                                                                                                                                                                                                                                                                                                                                                                                                                                                                                                                                                                                                                                                                                                                                                                                                                                  |
| VC_657_0 | AY739900, EU340421, KF188410, KJ564036, KJ564037, KJ564038, MG913376                                                                                                                                                                                                                                                                                                                                                                                                                                                                                                                                                                                                                                                                                                                                                                                                                                                                                                                                                                                                                                                                                                                |
| VC_66_0  | MT366760, MT366761                                                                                                                                                                                                                                                                                                                                                                                                                                                                                                                                                                                                                                                                                                                                                                                                                                                                                                                                                                                                                                                                                                                                                                  |
| VC_661_0 | HQ632860, MG592506, MG592545, MG592567, MG592568, MG592600, MG592630                                                                                                                                                                                                                                                                                                                                                                                                                                                                                                                                                                                                                                                                                                                                                                                                                                                                                                                                                                                                                                                                                                                |
| VC_661_1 | OX241574                                                                                                                                                                                                                                                                                                                                                                                                                                                                                                                                                                                                                                                                                                                                                                                                                                                                                                                                                                                                                                                                                                                                                                            |
| VC_661_2 | AY772740, JF974313, MG676223, MK097141, ON714422, OP375635                                                                                                                                                                                                                                                                                                                                                                                                                                                                                                                                                                                                                                                                                                                                                                                                                                                                                                                                                                                                                                                                                                                          |
| VC_661_3 | KX507045, MG592494, MG592501, MG592508, MG592514, MG592583, MG592587, MG592595, MG592644                                                                                                                                                                                                                                                                                                                                                                                                                                                                                                                                                                                                                                                                                                                                                                                                                                                                                                                                                                                                                                                                                            |
| VC_661_4 | MW824412, MW824413                                                                                                                                                                                                                                                                                                                                                                                                                                                                                                                                                                                                                                                                                                                                                                                                                                                                                                                                                                                                                                                                                                                                                                  |
| VC_661_5 | MG592544, MG592664, MG592665, OX241573                                                                                                                                                                                                                                                                                                                                                                                                                                                                                                                                                                                                                                                                                                                                                                                                                                                                                                                                                                                                                                                                                                                                              |
| VC_662_0 | JF974287, MK249872                                                                                                                                                                                                                                                                                                                                                                                                                                                                                                                                                                                                                                                                                                                                                                                                                                                                                                                                                                                                                                                                                                                                                                  |
| VC_663_0 | KC542353, KP994596, KU747973, MK387309, MN313256                                                                                                                                                                                                                                                                                                                                                                                                                                                                                                                                                                                                                                                                                                                                                                                                                                                                                                                                                                                                                                                                                                                                    |
| VC_664_0 | MG592390, MG592420, MG592423, MG592439, MG592444, MG592454, MG592465, MG592466                                                                                                                                                                                                                                                                                                                                                                                                                                                                                                                                                                                                                                                                                                                                                                                                                                                                                                                                                                                                                                                                                                      |
| VC_665_0 | MG592393, MG592477, MG592478, MG592518, MG592540, MG592552, MG592569, MG592570, MG592608, MG592614, MG592622, MG592627, MG592628, MG592641, MG592647, MG592656, MW824369, MW824373, MW824374, MW824378, MW824379, MW824383, OX241429, OX241438, OX241498, OX241557, OX241558, OX241575, OX241591                                                                                                                                                                                                                                                                                                                                                                                                                                                                                                                                                                                                                                                                                                                                                                                                                                                                                    |
| VC_666_0 | CP069347, HG796225, HG798901, JX145342, LK985321, LN681538, LN681540, MK473382, MT193276, MW512571, MW512572                                                                                                                                                                                                                                                                                                                                                                                                                                                                                                                                                                                                                                                                                                                                                                                                                                                                                                                                                                                                                                                                        |
| VC_67_0  | MK552140, MK552141                                                                                                                                                                                                                                                                                                                                                                                                                                                                                                                                                                                                                                                                                                                                                                                                                                                                                                                                                                                                                                                                                                                                                                  |
| VC_67_1  | MN094788                                                                                                                                                                                                                                                                                                                                                                                                                                                                                                                                                                                                                                                                                                                                                                                                                                                                                                                                                                                                                                                                                                                                                                            |
| VC_67_2  | MW460245                                                                                                                                                                                                                                                                                                                                                                                                                                                                                                                                                                                                                                                                                                                                                                                                                                                                                                                                                                                                                                                                                                                                                                            |
| VC_67_3  | AB366653                                                                                                                                                                                                                                                                                                                                                                                                                                                                                                                                                                                                                                                                                                                                                                                                                                                                                                                                                                                                                                                                                                                                                                            |
| VC_671_0 | EU874396, GU229986, KX227758, KX227759                                                                                                                                                                                                                                                                                                                                                                                                                                                                                                                                                                                                                                                                                                                                                                                                                                                                                                                                                                                                                                                                                                                                              |
| VC_673_0 | KT725776, KX227775, KX227760, MW302330                                                                                                                                                                                                                                                                                                                                                                                                                                                                                                                                                                                                                                                                                                                                                                                                                                                                                                                                                                                                                                                                                                                                              |
| VC_674_0 | GU071099, MH512890                                                                                                                                                                                                                                                                                                                                                                                                                                                                                                                                                                                                                                                                                                                                                                                                                                                                                                                                                                                                                                                                                                                                                                  |
| VC_674_1 | GU071103                                                                                                                                                                                                                                                                                                                                                                                                                                                                                                                                                                                                                                                                                                                                                                                                                                                                                                                                                                                                                                                                                                                                                                            |
| VC_674_2 | AY940168, HQ337021, HQ634176                                                                                                                                                                                                                                                                                                                                                                                                                                                                                                                                                                                                                                                                                                                                                                                                                                                                                                                                                                                                                                                                                                                                                        |
| VC_674_3 | HQ634175                                                                                                                                                                                                                                                                                                                                                                                                                                                                                                                                                                                                                                                                                                                                                                                                                                                                                                                                                                                                                                                                                                                                                                            |
| VC_674_4 | JN371769                                                                                                                                                                                                                                                                                                                                                                                                                                                                                                                                                                                                                                                                                                                                                                                                                                                                                                                                                                                                                                                                                                                                                                            |
| VC_674_5 | KU686207, KU686208, KU686209                                                                                                                                                                                                                                                                                                                                                                                                                                                                                                                                                                                                                                                                                                                                                                                                                                                                                                                                                                                                                                                                                                                                                        |
| VC_674_6 | GU071106, HQ634190                                                                                                                                                                                                                                                                                                                                                                                                                                                                                                                                                                                                                                                                                                                                                                                                                                                                                                                                                                                                                                                                                                                                                                  |
| VC_674_7 | HQ634189, MH920639, MH920640                                                                                                                                                                                                                                                                                                                                                                                                                                                                                                                                                                                                                                                                                                                                                                                                                                                                                                                                                                                                                                                                                                                                                        |
| VC_674_8 | GU071094                                                                                                                                                                                                                                                                                                                                                                                                                                                                                                                                                                                                                                                                                                                                                                                                                                                                                                                                                                                                                                                                                                                                                                            |
| VC_674_9 | GU071097                                                                                                                                                                                                                                                                                                                                                                                                                                                                                                                                                                                                                                                                                                                                                                                                                                                                                                                                                                                                                                                                                                                                                                            |
| VC_675_0 | HQ316583, HQ316603                                                                                                                                                                                                                                                                                                                                                                                                                                                                                                                                                                                                                                                                                                                                                                                                                                                                                                                                                                                                                                                                                                                                                                  |
| VC_675_1 | KJ019028, KJ019029, KJ019031, KJ019032, KJ019034, KJ019035, KJ019036, KJ019046, KJ019047, KJ019048, KJ019050, KJ019056, KJ019057, KJ019062, KJ019070, KJ019072, KJ019073, KJ019074, KJ019075, KJ019077, KJ019078, KJ019079, KJ019080, KJ019083, KJ019112, KJ019113, KJ019115, KJ019117, KJ019118, KJ019119, KJ019120, KJ019121, KJ019124, KJ019125, KJ019126, KJ019127, KJ019129, KJ019130, KJ019131, KJ019136, KJ019139, KJ019140, KJ019160, KJ019162, KJ019164, KJ019165                                                                                                                                                                                                                                                                                                                                                                                                                                                                                                                                                                                                                                                                                                          |
| VC_676_0 | KU686212, KU686213, MT586120                                                                                                                                                                                                                                                                                                                                                                                                                                                                                                                                                                                                                                                                                                                                                                                                                                                                                                                                                                                                                                                                                                                                                        |
| VC_676_1 | KJ019037, KJ019045, KJ019052, KJ019053, KJ019058, KJ019059, KJ019066, KJ019085, KJ019086, KJ019090, KJ019091, KJ019092, KJ019093, KJ019095, KJ019096, KJ019097, KJ019098, KJ019099, KJ019100, KJ019101, KJ019102, KJ019103, KJ019105, KJ019106, KJ019107, KJ019111, KJ019123, KJ019141, KJ019142, KJ019143, KJ019144, KJ019145, KJ019146, KJ019147, KJ019148, KJ019149, KJ019150, KJ019151, KJ019152, KJ019155, KJ019159                                                                                                                                                                                                                                                                                                                                                                                                                                                                                                                                                                                                                                                                                                                                                            |
| VC_678_0 | MH319737, MH319746                                                                                                                                                                                                                                                                                                                                                                                                                                                                                                                                                                                                                                                                                                                                                                                                                                                                                                                                                                                                                                                                                                                                                                  |
| VC_68_0  | KY448244, MW366843                                                                                                                                                                                                                                                                                                                                                                                                                                                                                                                                                                                                                                                                                                                                                                                                                                                                                                                                                                                                                                                                                                                                                                  |
| VC_68_1  | MZ475891, MZ475892, MZ475893, MZ475894, MZ475895, MZ475896, MZ475897, MZ475898                                                                                                                                                                                                                                                                                                                                                                                                                                                                                                                                                                                                                                                                                                                                                                                                                                                                                                                                                                                                                                                                                                      |
| VC_68_2  | KY984068, MZ443769                                                                                                                                                                                                                                                                                                                                                                                                                                                                                                                                                                                                                                                                                                                                                                                                                                                                                                                                                                                                                                                                                                                                                                  |
| VC_68_3  | MH248138, MH460463, MZ443770, MZ443771, MZ443772, MZ443773, MZ443774, MZ443776, MZ443777, MZ443778, MZ443779, MZ443780, MZ443782, MZ443783, MZ443784, MZ443785, MZ443786, MZ443787, MZ443788, MZ443789                                                                                                                                                                                                                                                                                                                                                                                                                                                                                                                                                                                                                                                                                                                                                                                                                                                                                                                                                                              |
| VC_68_4  | MH389777, MH460460, MH460461, MH460462                                                                                                                                                                                                                                                                                                                                                                                                                                                                                                                                                                                                                                                                                                                                                                                                                                                                                                                                                                                                                                                                                                                                              |
| VC_68_5  | LT598654                                                                                                                                                                                                                                                                                                                                                                                                                                                                                                                                                                                                                                                                                                                                                                                                                                                                                                                                                                                                                                                                                                                                                                            |
| VC_681_0 | HQ317290, HQ317291, HQ317292, KX349226, KX349227, KX349228, KX349229, KX349230, KX349231, KX349232, KX349233, KX349234, KX349235, KX349236, KX349237, KX349238, KX349239, KX349240, KX349241, KX349242, KX349243, KX349244, KX349245, KX349246, KX349247, KX349248, KX349249, KX349250, KX349251, KX349252, KX349253, KX349254, KX349255, KX349256, KX349257, KX349258, KX349259, KX349260, KX349261, KX349262, KX349263, KX349264, KX349265, KX349266, KX349267, KX349268, KX349269, KX349270, KX349271, KX349272, KX349273, KX349274, KX349275, KX349276, KX349277, KX349278, KX349279, KX349280, KX349281, KX349282, KX349283, KX349284                                                                                                                                                                                                                                                                                                                                                                                                                                                                                                                                          |
| VC_684_0 | AY950802, N968479, KC252997, KT809302                                                                                                                                                                                                                                                                                                                                                                                                                                                                                                                                                                                                                                                                                                                                                                                                                                                                                                                                                                                                                                                                                                                                               |
| VC_685_0 | KF929199, KJ804259, MT596499, MZ417336, MZ417339, MZ417343, MZ417348                                                                                                                                                                                                                                                                                                                                                                                                                                                                                                                                                                                                                                                                                                                                                                                                                                                                                                                                                                                                                                                                                                                |
| VC_685_1 | MK356730                                                                                                                                                                                                                                                                                                                                                                                                                                                                                                                                                                                                                                                                                                                                                                                                                                                                                                                                                                                                                                                                                                                                                                            |
| VC_685_2 | MK893987                                                                                                                                                                                                                                                                                                                                                                                                                                                                                                                                                                                                                                                                                                                                                                                                                                                                                                                                                                                                                                                                                                                                                                            |
| VC_686_0 | GU295964, HQ918180, KT001918, KT001919, KT321315, KX130727, LR746310, LT607758, MN101223, MT157285, MW448170, MZ322895, MZ612130, MZ707156, MZ707157, OK631812, OK631813, OM103621, OM971648, OM971649, ON515458, OP045497, OP684128, OX335396, OX335407                                                                                                                                                                                                                                                                                                                                                                                                                                                                                                                                                                                                                                                                                                                                                                                                                                                                                                                            |
| VC_686_1 | OP617746                                                                                                                                                                                                                                                                                                                                                                                                                                                                                                                                                                                                                                                                                                                                                                                                                                                                                                                                                                                                                                                                                                                                                                            |
| VC_686_2 | MN101221                                                                                                                                                                                                                                                                                                                                                                                                                                                                                                                                                                                                                                                                                                                                                                                                                                                                                                                                                                                                                                                                                                                                                                            |
| VC_686_3 | MN101224                                                                                                                                                                                                                                                                                                                                                                                                                                                                                                                                                                                                                                                                                                                                                                                                                                                                                                                                                                                                                                                                                                                                                                            |
| VC_687_0 | JN882287, KT381880, KX431559, KX431560, KX443552, LC589952, MH823906, MN508621, MN508622, MN508623, MN508624, MT341500, MW021751, MW021756, MW250785, MW629017, MW767161, OL539470, OL539471, OL551674, ON157416                                                                                                                                                                                                                                                                                                                                                                                                                                                                                                                                                                                                                                                                                                                                                                                                                                                                                                                                                                    |



VC\_687\_1 AY967407,HE858210,HE981739,HM134276,KC801932,KM236237,KR869820,KX245890,MT334653,MW021749  
VC\_687\_2 MN508817  
VC\_687\_3 MN038175  
VC\_687\_4 OK210075  
VC\_687\_5 MT560058  
VC\_688\_0 CAKLQA020000002,MW176033  
VC\_689\_0 MN937349,MW393850,MZ326859,MZ398240,MZ398241  
VC\_69\_0 AP018399  
VC\_69\_1 MN047793  
VC\_690\_0 BCP1,MG883715,MG883725,MG945215,MG945341,MG945520,MG945551,MG945686,MG945756,MT135344,MT135404,MT135412  
VC\_697\_0 BK013345,BK013346,BK013347  
VC\_698\_0 BK059895,OM373202  
VC\_699\_0 BK061308,BK061309,BK061310,BK061311,BK061312  
VC\_7\_0 AB009866,AB044554,AB243556,AF424783,CP062426,CP062435,CP062445,CP062457,EF462197,EF462199,FF713816,GQ915271,KC342645,KX232515,KY389063,KY389064,KY653125,KY695153,MH384260,MH401414,MH401415,MW147366,MW192778,MW627293,MW650841,OM439664,OP136133,OP493557  
VC\_70\_0 MN988515,MN988535,MN988540,MW980063,MW980064  
VC\_700\_0 MW353181,MW584168,MW584172,MW584178,MW584190  
VC\_701\_0 MG872834,MH513979,MH651167,MK284520,MK433274,MK433275,MK820641,MN062715,MT521999,MW534378,MW601219,MZ322028,MZ622161,MZ622165,ON108651,OP434460  
VC\_702\_0 MK494099,ON260818  
VC\_702\_1 KU728633,MK977701  
VC\_703\_0 KFI14879,KFI14880,KX656785  
VC\_703\_1 KFI14876,KFI14877  
VC\_704\_0 MF974396,MF974397  
VC\_705\_0 DQ490056,MW791312  
VC\_707\_0 MT939241,ON506926  
VC\_707\_1 CAJCJZ010000002,LTS46029,LT615366,MT119360,MT119361  
VC\_708\_0 MF001358,MF001361  
VC\_71\_0 AB920995,AB983711,GU393987,HG793132,HG796219,HG796220,HG796221,KC853746,KT381879,KX660669,KY316062,KY464836,KY981272,MF621978,MH684921,MN191861,MT740728,MZ326863,OK319016,OK335783,ON170174,ON170178,ON170184,ON170190,ON170318,ON170358,ON529868  
VC\_710\_0 MW672041  
VC\_711\_0 CAJDJX010000002,CAJDKF010000002,JX193904,KF728385,KF733017,KJ127304,KR131750,KT932701,KX284704,LC623721,MF678788,MF678789,MF678790,MG264739,MG708276,MH193369,MH203383,MH203384,MH355583,MH375074,MK125140,MK360024,MK721186,MK721187,MK721190,MK721191,MK721199,MK721200,MK982307,MT119359,MT520979,MT627482,MT661597,MT661598,MT829326,MT857001,MZ182246,MZ272341,MZ326865,MZ333461,OL505084,OL539449,OL799256,OL799257,ON113176,ON113334,OP254195,OP559177  
VC\_712\_0 KJ507100,MT104473,MT104475,MZ348425,MZ868718  
VC\_713\_0 HE806280,HM368260,JX976549,KJ817802,KP861229,KP861231,KU510289,KY670595,KY829116,MF346584,MH853786,MH853787,MH853788,MN166083,MN516421,MN516422,MZ593728,MZ618622,MZ712044,OL743187,OM471864,ON036882,ON036883,ON237674,ON480525,OP585104  
VC\_714\_0 CAKLQB020000001,CAKLQCO20000001,HQ186308,JX658790,KC311669,KR149290,KT339321,KT388102,KT388103,KT804908,KY082667,KY268295,KY268296,KY888680,MF033347,MF033348,MF033349,MF033350,MF033351,MG459218,MG599035,MH042230,MH763831,MH800200,MK089780,MK257719,MK257720,MK257721,MK257722,MK257723,MK278859,MN061582,MN212906,MN294712,MN395291,MN433707,MN604238,MN604239,MN614471,MN651570,MN807295,MT263719,MT633129,MT741944,MW056501,MW056502,MW056503,MW345241,MW366783,MW366784,MW459163,MW926912,MZ099557,MZ593174,MZ868724,MZ868725,MZ868726,MZ936314,MZ936315,MZ936316,MZ967493,OK546191,OL770263,OL964948,OM925528,ON210142,ON513429,OP019135,OP171942,OP291336,OP508218  
VC\_715\_0 KJ628499,MH746814,MH800198,MH800199,MK170160,MT1188223,MT623546,MW349133,OL960030,OP585105  
VC\_715\_1 KJ473422  
VC\_716\_0 MN276049,MZ477002  
VC\_716\_1 MH133207,MZ043613  
VC\_716\_2 CAKLQE020000001  
VC\_717\_0 KM672662,KY000079,MW316731,MW316732,MW316733  
VC\_719\_0 DQ150593,DQ222851,DQ222853,DQ222855,DQ289555,DQ289556,DQ629922,KY963369,KY963370,KY963371,MK085976,MT745954,MT745955,MT745956,OK499979,OK499999  
VC\_721\_0 KFS91601,MF614100,MH363708,MK105855,MK1125141,MK651787,MN850581,MN850588,MN850623,MW258710,MW258711  
VC\_722\_0 CP002495,CP091911  
VC\_725\_0 KFI010834,KP202972,KP296791,KP296793,KP296794,KP296795,KP296796,KT361649,KT361650,KT361652,MG727695,MG727696,MG727698,MG727699,MG727700,MG727701,MG727702,MH431931,MH431932,MH431933,MH431934,MH431935,MH431936,MH431937,MH454077,MH454078,MH454079,MH454082,MH454083,MH454084,MW927511,MW927513,MW927514,MW927515,MW927516,MW927517,MW927519,MW927520,MW927521,MW927522,MW927523,MW927524,MW927525,OP503992,OP503993,OP503994,OP503995  
VC\_73\_0 JN882298,MG201401  
VC\_731\_0 ON464760,ON464761,ON464762  
VC\_734\_0 KPI137433,KPI137435,KPI137437,KPI137439  
VC\_735\_0 KT151955,KT151957  
VC\_735\_1 CP027117  
VC\_736\_0 CP045566,MN890136,MN890137,MN890138,MN890139,MN890140,MN890141,MN890142,MN890143  
VC\_737\_0 KJ419279,KP719132,KP719133,KP719134,KY926791,MK165087,MK373794,MK373795,MT682705,MZ501068,OK386652,ON922918  
VC\_738\_0 CP053388,CP054387,CP058330,CP101890,CP101896,KQ65645,MK422451,MZ779062,OV696614  
VC\_739\_0 MT770738,MT778838,MW960030  
VC\_739\_1 JX483881,MN988505,MN988506,MN988543,MN988547,MN988548  
VC\_740\_0 MG018927,MT354569,OM140839,OM223115  
VC\_741\_0 JN116824,KR053195,MH153804  
VC\_742\_0 JX182371,KY092479,KY092480,KY092481,KY092482,KY092483,KY092484,KY676784,MH825699,MK305888,MT711975  
VC\_743\_0 MK279841,MT316461,MT723933  
VC\_745\_0 CP060690,HQ377372,HQ377373,JF773396,KX879601,KX879602,KY661963,MT899443,MT899444  
VC\_746\_0 KX190833,MK759918  
VC\_749\_0 HM568888,KU057941,LN681535,LN681536,LN881738  
VC\_75\_0 KP626667,KU197013,KU595432,KU595433,LR778216,MF375456,MK903278,MN478375,OK258138,OK275495,ON911539,ON932078,ON932081,ON932083,ON960072  
VC\_753\_0 DQ003638,DQ004855,JQ797329,JX126918,KJ094029,KJ094030,KJ094031,KJ094033,KJ535721,KJ535722,KJ586794,KJ586795,KJ591604,KJ591605,KJ668715,KM373208,MK792752,MN128594,MN172529,MN939539,MN939540,MT178766,MT178767,MT438761,MT668623,MT668624  
VC\_754\_0 MN830254,MN830255  
VC\_755\_0 DQ003641,EU855793  
VC\_757\_0 KY065457,KY065464,MK448672,MK448849,MK448889  
VC\_76\_0 MZ666965,MZ666966  
VC\_760\_0 DQ079870,DQ079871,DQ079872,DQ079873,DQ079874,DQ079875,DQ079876,DQ079877,DQ079878,DQ079879,DQ085810,GQ149088,MG945254,MK629527,X60322,X60323  
VC\_762\_0 MT006233,MT006238,MT006239,MT006240



VC\_764\_0 DQ163912,KJ959591,KY707339,MK510962,MK510963,MK510964,MK510965,MK510968,MK510969,MK510970,MK510971,MK510974,MK510975,MK510976,MK510978,MK510984,MK510985,MK510986,MK510987,MK510988,MK510990,MK510992,MK510993

VC\_765\_0 MK510966,MK510967,MK510972,MK510973,MK510977,MK510979,MK510980,MK510981,MK510982,MK510983,MK510989,MK510991

VC\_766\_0 DQ163913,HQ962376,JF939047,JQ67092,JQ307387,KM434185,KR537871,KR537872,KR935213,KR935215,KU197014,LC552830,LR743530,MG897800,MK165657,MK165658,MK574078,MN062187,MT118304,MT118305,MW512832,MW677514,MW677526,MZ501266,MZ927745,MZ927746,OK094665,OK330455,OK330456,OK539825,OL802211,OM234791,ON189042,ON189043,ON189044,ON911538,ON932082,ON932085,OP009282,OP422637

VC\_767\_0 MG366115

VC\_768\_0 KP313532,MK962635,MK962636,MK962637

VC\_769\_0 MN734437,MN734438,MN734439

VC\_77\_0 GU988610,HE983845,HQ832595,KC862297,KC862298,KC862300,KR052143,KT736033,KT804923,KU297675,KU497559,KU761955,KY000083,KY073228,LN610572,LN610575,LN610586,LN610587,MF974178,MH370478,MH725810,MH791399,MH791408,MH791416,MK138526,MK224498,MK340761,MK443264,MN013356,MN563785,MN871470,MN871481,MN871488,MW526259,OK539826,ON169972,ON361135

VC\_77\_1 MK443265

VC\_771\_0 HQ641345,HQ641346,KM224878,KM224879,KY883657,KY883658,MT066160,MT767883

VC\_772\_0 DQ163915,KU535860,LT986460,MF788075,MG676466,MW929175,MZ089731,MZ727333,ON857932

VC\_773\_0 KC751414,KF302037

VC\_774\_0 MG592599,MG592619

VC\_775\_0 MG592629,MW824407,MW824408,MW824409,MW865297,MW865299,MW865302,MW865307,OL676770,OX241435,OX241436,OX241445,OX241446,OX241447,OX241501,OX241504,OX241559,OX241560

VC\_776\_0 MN988507,MN988510,MN988527

VC\_777\_0 MW202785,MW202796,OK172329

VC\_78\_0 AB472900,KC862295,KC862296,KC862299,KC862301,KM434186,KY994101,LN610573,LN610576,LN610581,LN610582,LN610583,MK799650,MT108728,MT108730,MT118294,MT118295,MT118300,OM421595,ON653033

VC\_783\_0 DQ398042,EU568876,F973624,GQ303261,JN412593,JN699002,KC787103,KC787104,KC787107,KC787108,KC787109,KC787110,KC787111,KC787112,KJ725374,KM923970,KT347314,KT355472,KT355474,KT365399,KX443326,KX534004,KX588251,KX641265,KX641266,KX664455,MF668268,MF668272,MF919497,MG099946,MH001455,MH001456,MH045569,MH077584,MH371116,MH371119,MH450127,MH479920,MH590605,MH779505,MH779507,MH779509,MH779513,MH779514,MH779515,MK305884,MK310146,MK433277,MK433279,MK524493,MK524494,MK919475,MN444875,MT818422,MW119570,MW291028,MZ171377,MZ747508,ON392160,ON392162,ON637759,ON637765,ON637766,ON645337,ON970618,OP172872,OP294982

VC\_784\_0 KJ410133,KR080197,KR080198,KR080202,MF141540,MK494105,MN234183,MN234185,MN234219

VC\_785\_0 MW584160,MW584202

VC\_785\_1 JN699628,KC900379,KT591491,MH697587,MK937612,MN586024,MT658803,MW713383,OP297551

VC\_785\_2 JF937105,KY223999,KY783914,MF319184,MT657341,MT658802,MW578836

VC\_786\_0 DQ398052,KP027195,KY385381,MN585992

VC\_787\_0 DQ431235,FJ706171,FJ706172,JX262215,JX262216,JX262217,JX262218,JX262219,JX262220,JX262221,JX262222,JX262223,JX262224,JX262225,JX570702,JX570703,JX570704,JX570705,JX570706,JX570707,JX570708,JX570709,JX570710,JX570711,JX570712,JX570713,JX570714,KJ578758,KJ578759,KJ578760,KJ578761,KJ578762,KJ578763,KJ578764,KJ578765,KJ578766,KJ578767,KJ578768,KJ578769,KJ578770,KJ578771,KJ578772,KJ578773,KJ578774,KJ578775,KJ578776,KJ578777,KJ578778,KJ578779,KJ578780,KJ578781,KJ578782,KJ578783,KJ578784,KJ578785,KJ578786,KJ578787,KJ578788,KJ578789,KJ578790,KJ578791,KJ578792,KJ72067,KR337643,KR337644,KR337645,KR337646,KR337647,KR337648,KR337649,KR337650,KR337651,KR337652,KR337653,KR337654,KR347352,KR347353,KR347354,KR347355,KR902978,KR902979,KR902980,KR902981,KR902982,KR902983,KR902984,KR902985,KR902986,KR902987,KT934381,KY926792,KY926793,MF919491,MF919505,MF919515,MF919516,MF919522,MF919533,MG820632,MG820633,MG820634,MG820635,MG820636,MG820637,MG820638,MG820639,MG820640,MG820641,MG820642,MG820643,MG820644,MN329678,MN813675,MN813677,MN813679,MN813683,MN813688,MN813689,MN813690,MN813691,MN813692,MT647607,MW161461,MW161462,MW161463,MW161464,MW161465,MW161466,MW161467,MW161468,MW505928

VC\_788\_0 LN681534,MN718463

VC\_789\_0 JF923796,JF923797,KR053201,MF919510,MF919542,MG757157,MG757166,MH536819,MH536824,MH576960,MH669007,MH669013,MH727547,MH727552,MH744424,MH779499,MH779501,MH779508,MH779510,MK376954,MK376960,MK376962,MK433272,MK977699,MN369753,MN369766,MN428063,MN428064,MN428065,MN428066,MN428067,MN428068,MN428069,MN428070,MN428071,MN428072,MN428073,MN428074,MN428075,MN428076,MN428077,MN428078,MN428079,MN428080,MN428081,MN428082,MN428083,MN428084,MN428085,MN428086,MN428087,MN428088,MN428089,MN428090,MN428091,MN428092,MN428093,MN428094,MN428095,MN428096,MN428097,MN428098,MN428099,MN428100,MN428101,MN428102,MN428103,MN428104,MN428105,MN428106,MN428107,MN428108,MN428109,MN428110,MN428111,MN428112,MN428113,MN428114,MN428115,MN428116,MN428117,MN428118,MN428119,MN428120,MN428121,MN428122,MN428123,MN428124,MN428125,MN428126,MN428127,MN428128,MN428129,MN428130,MN428131,MN428132,MN428133,MN428134,MN428135,MN428136,MN428137,MN428138,MN428139,MN428140,MN428141,MN428142,MN428143,MN428144,MN428145,MN428146,MN428147,MN428148,MN428149,MN428150,MN428151,MN428152,MN428153,MN428154,MN428155,MN428156,MN428157,MN428158,MN428159,MN428160,MN428161,MN428162,MN428163,MN428164,MN428165,MN428166,MN428167,MN428168,MN428169,MN428170,MN428171,MN428172,MN428173,MN428174,MN428175,MN428176,MN428177,MN428178,MN428179,MN428180,MN428181,MN428182,MN428183,MN428184,MN428185,MN428186,MN428187,MN428188,MN428189,MN428190,MN428191,MN428192,MN428193,MN428194,MN428195,MN428196,MN428197,MN428198,MN428199,MN428200,MN428201,MN428202,MN428203,MN428204,MN428205,MN428206,MN428207,MN428208,MN428209,MN428210,MN428211,MN428212,MN428213,MN428214,MN428215,MN428216,MN428217,MN428218,MN428219,MN428220,MN428221,MN428222,MN428223,MN428224,MN428225,MN428226,MN428227,MN428228,MN428229,MN428230,MN428231,MN428232,MN428233,MN428234,MN428235,MN428236,MN428237,MN428238,MN428239,MN428240,MN428241,MN428242,MN428243,MN428244,MN428245,MN428246,MN428247,MN428248,MN428249,MN428250,MN428251,MN428252,MN428253,MN428254,MN428255,MN428256,MN428257,MN428258,MN428259,MN428260,MN428261,MN428262,MN428263,MN428264,MN428265,MN428266,MN428267,MN428268,MN428269,MN428270,MN428271,MN428272,MN428273,MN428274,MN428275,MN428276,MN428277,MN428278,MN428279,MN428280,MN428281,MN428282,MN428283,MN428284,MN428285,MN428286,MN428287,MN428288,MN428289,MN428290,MN428291,MN428292,MN428293,MN428294,MN428295,MN428296,MN428297,MN428298,MN428299,MN428300,MN428301,MN428302,MN428303,MN428304,MN428305,MN428306,MN428307,MN428308,MN428309,MN428310,MN428311,MN428312,MN428313,MN428314,MN428315,MN428316,MN428317,MN428318,MN428319,MN428320,MN428321,MN428322,MN428323,MN428324,MN428325,MN428326,MN428327,MN428328,MN428329,MN428330,MN428331,MN428332,MN428333,MN428334,MN428335,MN428336,MN428337,MN428338,MN428339,MN428340,MN428341,MN428342,MN428343,MN428344,MN428345,MN428346,MN428347,MN428348,MN428349,MN428350,MN428351,MN428352,MN428353,MN428354,MN428355,MN428356,MN428357,MN428358,MN428359,MN428360,MN428361,MN428362,MN428363,MN428364,MN428365,MN428366,MN428367,MN428368,MN428369,MN428370,MN428371,MN428372,MN428373,MN428374,MN428375,MN428376,MN428377,MN428378,MN428379,MN428380,MN428381,MN428382,MN428383,MN428384,MN428385,MN428386,MN428387,MN428388,MN428389,MN428390,MN428391,MN428392,MN428393,MN428394,MN428395,MN428396,MN428397,MN428398,MN428399,MN428400,MN428401,MN428402,MN428403,MN428404,MN428405,MN428406,MN428407,MN428408,MN428409,MN428410,MN428411,MN428412,MN428413,MN428414,MN428415,MN428416,MN428417,MN428418,MN428419,MN428420,MN428421,MN428422,MN428423,MN428424,MN428425,MN428426,MN428427,MN428428,MN428429,MN428430,MN428431,MN428432,MN428433,MN428434,MN428435,MN428436,MN428437,MN428438,MN428439,MN428440,MN428441,MN428442,MN428443,MN428444,MN428445,MN428446,MN428447,MN428448,MN428449,MN428450,MN428451,MN428452,MN428453,MN428454,MN428455,MN428456,MN428457,MN428458,MN428459,MN428460,MN428461,MN428462,MN428463,MN428464,MN428465,MN428466,MN428467,MN428468,MN428469,MN428470,MN428471,MN428472,MN428473,MN428474,MN428475,MN428476,MN428477,MN428478,MN428479,MN428480,MN428481,MN428482,MN428483,MN428484,MN428485,MN428486,MN428487,MN428488,MN428489,MN428490,MN428491,MN428492,MN428493,MN428494,MN428495,MN428496,MN428497,MN428498,MN428499,MN428500,MN428501,MN428502,MN428503,MN428504,MN428505,MN428506,MN428507,MN428508,MN428509,MN428510,MN428511,MN428512,MN428513,MN428514,MN428515,MN428516,MN428517,MN428518,MN428519,MN428520,MN428521,MN428522,MN428523,MN428524,MN428525,MN428526,MN428527,MN428528,MN428529,MN428530,MN428531,MN428532,MN428533,MN428534,MN428535,MN428536,MN428537,MN428538,MN428539,MN428540,MN428541,MN428542,MN428543,MN428544,MN428545,MN428546,MN428547,MN428548,MN428549,MN428550,MN428551,MN428552,MN428553,MN428554,MN428555,MN428556,MN428557,MN428558,MN428559,MN428560,MN428561,MN428562,MN428563,MN428564,MN428565,MN428566,MN428567,MN428568,MN428569,MN428570,MN428571,MN428572,MN428573,MN428574,MN428575,MN428576,MN428577,MN428578,MN428579,MN428580,MN428581,MN428582,MN428583,MN428584,MN428585,MN428586,MN428587,MN428588,MN428589,MN428590,MN428591,MN428592,MN428593,MN428594,MN428595,MN428596,MN428597,MN428598,MN428599,MN428600,MN428601,MN428602,MN428603,MN428604,MN428605,MN428606,MN428607,MN428608,MN428609,MN428610,MN428611,MN428612,MN428613,MN428614,MN428615,MN428616,MN428617,MN428618,MN428619,MN428620,MN428621,MN428622,MN428623,MN428624,MN428625,MN428626,MN428627,MN428628,MN428629,MN428630,MN428631,MN428632,MN428633,MN428634,MN428635,MN428636,MN428637,MN428638,MN428639,MN428640,MN428641,MN428642,MN428643,MN428644,MN428645,MN428646,MN428647,MN428648,MN428649,MN428650,MN428651,MN428652,MN428653,MN428654,MN428655,MN428656,MN428657,MN428658,MN428659,MN428660,MN428661,MN428662,MN428663,MN428664,MN428665,MN428666,MN428667,MN428668,MN428669,MN428670,MN428671,MN428672,MN428673,MN428674,MN428675,MN428676,MN428677,MN428678,MN428679,MN428680,MN428681,MN428682,MN428683,MN428684,MN428685,MN428686,MN428687,MN428688,MN428689,MN428690,MN428691,MN428692,MN428693,MN428694,MN428695,MN428696,MN428697,MN428698,MN428699,MN428700,MN428701,MN428702,MN428703,MN428704,MN428705,MN428706,MN428707,MN428708,MN428709,MN428710,MN428711,MN428712,MN428713,MN428714,MN428715,MN428716,MN428717,MN428718,MN428719,MN428720,MN428721,MN428722,MN428723,MN428724,MN428725,MN428726,MN428727,MN428728,MN428729,MN428730,MN428731,MN428732,MN428733,MN428734,MN428735,MN428736,MN428737,MN428738,MN428739,MN428740,MN428741,MN428742,MN428743,MN428744,MN428745,MN428746,MN428747,MN428748,MN428749,MN428750,MN428751,MN428752,MN428753,MN428754,MN428755,MN428756,MN428757,MN428758,MN428759,MN428760,MN428761,MN428762,MN428763,MN428764,MN428765,MN428766,MN428767,MN428768,MN428769,MN428770,MN428771,MN428772,MN428773,MN428774,MN428775,MN428776,MN428777,MN428778,MN428779,MN428780,MN428781,MN428782,MN428783,MN428784,MN428785,MN428786,MN428787,MN428788,MN428789,MN428790,MN428791,MN428792,MN428793,MN428794,MN428795,MN428796,MN428797,MN428798,MN428799,MN428800,MN428801,MN428802,MN428803,MN428804,MN428805,MN428806,MN428807,MN428808,MN428809,MN428810,MN428811,MN428812,MN428813,MN428814,MN428815,MN428816,MN428817,MN428818,MN428819,MN428820,MN428821,MN428822,MN428823,MN428824,MN428825,MN428826,MN428827,MN428828,MN428829,MN428830,MN428831,MN428832,MN428833,MN428834,MN428835,MN428836,MN428837,MN428838,MN428839,MN428840,MN428841,MN428842,MN428843,MN428844,MN428845,MN428846,MN428847,MN428848,MN428849,MN428850,MN428851,MN428852,MN428853,MN428854,MN428855,MN428856,MN428857,MN428858,MN428859,MN428860,MN428861,MN428862,MN428863,MN428864,MN428865,MN428866,MN428867,MN428868,MN428869,MN428870,MN428871,MN428872,MN428873,MN428874,MN428875,MN428876,MN428877,MN428878,MN428879,MN428880,MN428881,MN428882,MN428883,MN428884,MN428885,MN428886,MN428887,MN428888,MN428889,MN428890,MN428891,MN428892,MN428893,MN428894,MN428895,MN428896,MN428897,MN428898,MN428899,MN428900,MN428901,MN428902,MN428903,MN428904,MN428905,MN428906,MN428907,MN428908,MN428909,MN428910,MN428911,MN428912,MN428913,MN428914,MN428915,MN428916,MN428917,MN428918,MN428919,MN428920,MN428921,MN428922,MN428923,MN428924,MN428925,MN428926,MN428927,MN428928,MN428929,MN428930,MN428931,MN428932,MN428933,MN428934,MN428935,MN428936,MN428937,MN428938,MN428939,MN428940,MN428941,MN428942,MN428943,MN428944,MN428945,MN428946,MN428947,MN428948,MN428949,MN428950,MN428951,MN428952,MN428953,MN428954,MN428955,MN428956,MN428957,MN428958,MN428959,MN428960,MN428961,MN428962,MN428963,MN428964,MN428965,MN428966,MN428967,MN428968,MN428969,MN428970,MN428971,MN428972,MN428973,MN428974,MN428975,MN428976,MN428977,MN428978,MN428979,MN428980,MN428981,MN428982,MN428983,MN428984,MN428985,MN428986,MN428987,MN428988,MN428989,MN428990,MN428991,MN428992,MN428993,MN428994,MN428995,MN428996,MN428997,MN428998,MN428999,MN429000,MN429001,MN429002,MN429003,MN429004,MN429005,MN429006,MN429007,MN429008,MN429009,MN429010,MN429011,MN429012,MN429013,MN429014,MN429015,MN429016,MN429017,MN429018,MN429019,MN429020,MN429021,MN429022,MN429023,MN429024,MN429025,MN429026,MN429027,MN429028,MN429029,MN429030,MN429031,MN429032,MN429033,MN429034,MN429035,MN429036,MN429037,MN429038,MN429039,MN429040,MN429041,MN429042,MN429043,MN429044,MN429045,MN429046,MN429047,MN429048,MN429049,MN429050,MN429051,MN429052,MN429053,MN429054,MN429055,MN429056,MN429057,MN429058,MN429059,MN429060,MN429061,MN429062,MN429063,MN429064,MN429065,MN429066,MN429067,MN429068,MN429069,MN429070,MN429071,MN429072,MN429073,MN429074,MN429075,MN429076,MN429077,MN429078,MN429079,MN429080,MN429081,MN429082,MN429083,MN429084,MN429085,MN429086,MN429087,MN429088,MN429089,MN429090,MN429091,MN429092,MN429093,MN429094,MN429095,MN429096,MN429097,MN429098,MN429099,MN429100,MN429101,MN429102,MN429103,MN429104,MN429105,MN429106,MN429107,MN429108,MN429109,MN429110,MN429111,MN429112,MN429113,MN429114,MN429115,MN429116,MN429117,MN429118,MN429119,MN429120,MN429121,MN429122,MN429123,MN429124,MN429125,MN429126,MN429127,MN429128,MN429129,MN42



VC\_8\_0

VC\_80\_0

VC\_80\_1

VC\_80\_10

VC\_80\_11

VC\_80\_2

VC\_80\_3

VC\_80\_4

VC\_80\_5

VC\_80\_6

VC\_80\_7

VC\_80\_8

VC\_80\_9

VC\_800\_0

VC\_801\_0

VC\_801\_1

VC\_801\_2

VC\_801\_3

VC\_802\_0

VC\_803\_0

VC\_804\_0

VC\_805\_0

VC\_806\_0

VC\_808\_0

VC\_809\_0

VC\_809\_1

VC\_81\_0

VC\_814\_0

VC\_815\_0

VC\_816\_0

VC\_817\_0

VC\_818\_0

VC\_819\_0

VC\_820\_0

VC\_821\_0

VC\_823\_0

VC\_824\_0

VC\_825\_0

VC\_829\_0

VC\_83\_0

VC\_830\_0

VC\_831\_0

VC\_832\_0

VC\_833\_0

VC\_834\_0

VC\_836\_0

VC\_836\_1

VC\_836\_2

VC\_836\_3

VC\_837\_0

VC\_837\_1

VC\_838\_0

VC\_839\_0

VC\_84\_0

VC\_842\_0

VC\_843\_0

VC\_844\_0

VC\_848\_0

VC\_849\_0



|          |                                                                                                                                                                                                                                                                                                                                                                                                                                                                                                                                                                                                                                                                                                                                                                                                                                                    |
|----------|----------------------------------------------------------------------------------------------------------------------------------------------------------------------------------------------------------------------------------------------------------------------------------------------------------------------------------------------------------------------------------------------------------------------------------------------------------------------------------------------------------------------------------------------------------------------------------------------------------------------------------------------------------------------------------------------------------------------------------------------------------------------------------------------------------------------------------------------------|
| VC_850_0 | ON170019,ON170022,ON170028,ON170033,ON170036,ON170038,ON170040,ON170049,ON170054,ON170074,ON170086,ON170088,ON170090,ON170092,ON170094,ON170096,ON170098,ON170100,ON170102,ON170104,ON170106,ON170108,ON170110,ON170112,ON170114,ON170116,ON170118,ON170120,ON170122,ON170124,ON170126,ON170142,ON170144,ON170146,ON170152,ON170154,ON170156,ON170158,ON170160,ON170162,ON170164,ON170167,ON170176,ON170180,ON170186,ON170189,ON170192,ON170194,ON170196,ON170198,ON170200,ON170202,ON170204,ON170206,ON170211,ON170215,ON170217,ON170219,ON170221,ON170222,ON170225,ON170244,ON170246,ON170248,ON170250,ON170252,ON170271,ON170280,ON170282,ON170284,ON170289,ON170291,ON170293,ON170295,ON170297,ON170298,ON170300,ON170306,ON170307,ON170311,ON170313,ON170315,ON170330,ON170332,ON170334,ON170336,ON170338,ON170340,ON170352,ON170356,ON170360 |
| VC_851_0 | KJ018213,MG592431,MG592432,MG592435,MG592458,MG592666                                                                                                                                                                                                                                                                                                                                                                                                                                                                                                                                                                                                                                                                                                                                                                                              |
| VC_852_0 | JQ619704,MG784342,MH598512                                                                                                                                                                                                                                                                                                                                                                                                                                                                                                                                                                                                                                                                                                                                                                                                                         |
| VC_853_0 | EU887664,JX887877,KF296717,KX190834,MT136606                                                                                                                                                                                                                                                                                                                                                                                                                                                                                                                                                                                                                                                                                                                                                                                                       |
| VC_854_0 | FJ008913,HE608841,MN078104,MT630433,MW314138,MW916539                                                                                                                                                                                                                                                                                                                                                                                                                                                                                                                                                                                                                                                                                                                                                                                              |
| VC_857_0 | FJ591093,FJ591094,FR682616,FR719956,HQ317387,KJ621082,KJ803031,KU885988,KU885989,KU885990,MH015250,MH015253,MH015256,MH015257,MH015259,MZ773648                                                                                                                                                                                                                                                                                                                                                                                                                                                                                                                                                                                                                                                                                                    |
| VC_858_0 | FJ685651,GU321093,JN882264,JN882266,KF056323,MW344764,MW344766                                                                                                                                                                                                                                                                                                                                                                                                                                                                                                                                                                                                                                                                                                                                                                                     |
| VC_859_0 | FJ750948,CQ502199,JN984867,JQ086375,JX865427,KM233151,KM896878,KX534335,KX534336,KX534338,KX534339,KX534341,L,N8881730,L,N8881731,LR597646,LR990702,LR999870,LT960609,MG065648,MG581355,MK138527,MK373789,MK373790,MK373791,MK728541,MN850575,MN850589,MN850628,MN850629,MN850650,MT331608,MT446389,MT446391,MT478993,MT884012,MT884013,MT884014,MT884015,MT951623,MW749005,MW822006,MW862804,MZ234008,MZ234014,MZ234016,MZ234026,MZ234029,MZ501070,MZ501088,MZ501095,MZ501097,MZ501107,OK272474,OK272488,OK310512,OK310513,OK310514,OK499985,OK499988,OK499993,OL615010,OL770278,OM262540,OM262541,ON184124,ON210136,OP046317                                                                                                                                                                                                                     |
| VC_860_0 | KT367887,MN656993,MT075871,MW411991,OL539440,OM687892,ON602734,ON602747,ON602766                                                                                                                                                                                                                                                                                                                                                                                                                                                                                                                                                                                                                                                                                                                                                                   |
| VC_861_0 | FJ896200,LR794124,MF754111,MF754112,MK474470,MN974282,MT178448,MT501516,MW250641,MW331544,MZ020222,MZ182247,MZ516827,MZ592921,OK349506,OK585158,OK585159,OK585160,OM362522,OM799543,ON080940,ON080941,ON457554,ON457555,ON457556,ON457557,ON864052,ON872379,OP117450                                                                                                                                                                                                                                                                                                                                                                                                                                                                                                                                                                               |
| VC_862_0 | FN422399,HG962375,JX194238,KM411958,KM411959,KM411960,KM974184,KP994390,KR052142,KR054032,KU948710,KX171209,KX171210,MF490236,MF490238,MH356729,MN553583,MN553584,MN906996,MT080102,MZ955867,OK665488,OL519844,OM234792,OM937766,ON815901,ON815902,ON815903,ON857943                                                                                                                                                                                                                                                                                                                                                                                                                                                                                                                                                                               |
| VC_863_0 | FN422398,LC064302,MT416090,OL519842,OM782452                                                                                                                                                                                                                                                                                                                                                                                                                                                                                                                                                                                                                                                                                                                                                                                                       |
| VC_865_0 | KY083726,KY514264,KY514265,KY549659,KY769270,MH059638,MN812685,MN812687,MN812691,MZ348421                                                                                                                                                                                                                                                                                                                                                                                                                                                                                                                                                                                                                                                                                                                                                          |
| VC_866_0 | MG775260,MH179480                                                                                                                                                                                                                                                                                                                                                                                                                                                                                                                                                                                                                                                                                                                                                                                                                                  |
| VC_867_0 | FN667788,FN667789,HE815464,MK408758,MT932329                                                                                                                                                                                                                                                                                                                                                                                                                                                                                                                                                                                                                                                                                                                                                                                                       |
| VC_868_0 | FR823450,GU296433,JN132397,JX569801,KF148616,KX229736,KX236333,KX879627,MH107028,MT863714,MT863715,MT863716,MT863717,MT863718,MT863719,MT863720,MT863721,MT863722,MT863723,MT863724,MT863725,MT863726,MT863727,MT863728,MT863729,MT863730,MT863731                                                                                                                                                                                                                                                                                                                                                                                                                                                                                                                                                                                                 |
| VC_869_0 | MK387337,MW451250,OM249648                                                                                                                                                                                                                                                                                                                                                                                                                                                                                                                                                                                                                                                                                                                                                                                                                         |
| VC_87_0  | KJ010547,KJ010548,KM051843                                                                                                                                                                                                                                                                                                                                                                                                                                                                                                                                                                                                                                                                                                                                                                                                                         |
| VC_87_1  | MW419084,MW419085,MW419086,MW419087                                                                                                                                                                                                                                                                                                                                                                                                                                                                                                                                                                                                                                                                                                                                                                                                                |
| VC_87_10 | MN043729                                                                                                                                                                                                                                                                                                                                                                                                                                                                                                                                                                                                                                                                                                                                                                                                                                           |
| VC_87_11 | MN940411                                                                                                                                                                                                                                                                                                                                                                                                                                                                                                                                                                                                                                                                                                                                                                                                                                           |
| VC_87_12 | MT151604                                                                                                                                                                                                                                                                                                                                                                                                                                                                                                                                                                                                                                                                                                                                                                                                                                           |
| VC_87_13 | KU640380                                                                                                                                                                                                                                                                                                                                                                                                                                                                                                                                                                                                                                                                                                                                                                                                                                           |
| VC_87_2  | KC699836,MW749002,MW749007                                                                                                                                                                                                                                                                                                                                                                                                                                                                                                                                                                                                                                                                                                                                                                                                                         |
| VC_87_3  | AB930182,AP013029,KF669652,LT960608,MF422185,MG000860,MW354667,MZ501260,MZ501261,MZ501262,MZ501263,MZ501265,OM982668,OM982669,OM982670,OM982671,OM982672,OM982673,OM982674                                                                                                                                                                                                                                                                                                                                                                                                                                                                                                                                                                                                                                                                         |
| VC_87_4  | KY368640,MN043730,OK349510                                                                                                                                                                                                                                                                                                                                                                                                                                                                                                                                                                                                                                                                                                                                                                                                                         |
| VC_87_5  | MH606185                                                                                                                                                                                                                                                                                                                                                                                                                                                                                                                                                                                                                                                                                                                                                                                                                                           |
| VC_87_6  | JX238501                                                                                                                                                                                                                                                                                                                                                                                                                                                                                                                                                                                                                                                                                                                                                                                                                                           |
| VC_87_7  | KM236246                                                                                                                                                                                                                                                                                                                                                                                                                                                                                                                                                                                                                                                                                                                                                                                                                                           |
| VC_87_8  | KU253712                                                                                                                                                                                                                                                                                                                                                                                                                                                                                                                                                                                                                                                                                                                                                                                                                                           |
| VC_87_9  | KM236245                                                                                                                                                                                                                                                                                                                                                                                                                                                                                                                                                                                                                                                                                                                                                                                                                                           |
| VC_870_0 | MK388689,OK570186                                                                                                                                                                                                                                                                                                                                                                                                                                                                                                                                                                                                                                                                                                                                                                                                                                  |
| VC_871_0 | LC739533,LC739534,LC739535,LC739537,LC739539                                                                                                                                                                                                                                                                                                                                                                                                                                                                                                                                                                                                                                                                                                                                                                                                       |
| VC_871_1 | JX561091,KX552041,KX664695,LR597654,LR746137,MG065650,MH051333,MH160766,MH252123,MK373788,MN850565,MN850571,MN850598,MN850618,MN850648,MT496970,MT944117,MW175890,MZ726793,OL505078,OL739525,OM362897,OM386656,OM386659,OM386667,OP562383                                                                                                                                                                                                                                                                                                                                                                                                                                                                                                                                                                                                          |
| VC_872_0 | FR775895,KU522583,LC739536,LR865361,MF805809,MG065639,MG065645,MG065656,MG065689,MH675927,MH816848,MN850573,MN850584,MN850601,MN850632,MN850645,MT932211,MZ501063,MZ501084,MZ501100,OK210077,OK272470,OM386653,OM386654,OM386658,OM401812,OP177727,OX090893                                                                                                                                                                                                                                                                                                                                                                                                                                                                                                                                                                                        |
| VC_872_1 | OP617743                                                                                                                                                                                                                                                                                                                                                                                                                                                                                                                                                                                                                                                                                                                                                                                                                                           |
| VC_873_0 | MH533020,ON287369,ON287374                                                                                                                                                                                                                                                                                                                                                                                                                                                                                                                                                                                                                                                                                                                                                                                                                         |
| VC_873_1 | MZ520832                                                                                                                                                                                                                                                                                                                                                                                                                                                                                                                                                                                                                                                                                                                                                                                                                                           |
| VC_873_2 | JQ015307,KY514263                                                                                                                                                                                                                                                                                                                                                                                                                                                                                                                                                                                                                                                                                                                                                                                                                                  |
| VC_873_3 | MF979560,MF979563                                                                                                                                                                                                                                                                                                                                                                                                                                                                                                                                                                                                                                                                                                                                                                                                                                  |
| VC_873_4 | MT552976,MT560059                                                                                                                                                                                                                                                                                                                                                                                                                                                                                                                                                                                                                                                                                                                                                                                                                                  |
| VC_873_5 | JQ691612,KC954774,KT353109                                                                                                                                                                                                                                                                                                                                                                                                                                                                                                                                                                                                                                                                                                                                                                                                                         |
| VC_873_6 | JQ691611,MN013077,OL744211,OL744214,OL744216,OL744219,OL744220                                                                                                                                                                                                                                                                                                                                                                                                                                                                                                                                                                                                                                                                                                                                                                                     |
| VC_873_7 | ON712643                                                                                                                                                                                                                                                                                                                                                                                                                                                                                                                                                                                                                                                                                                                                                                                                                                           |
| VC_873_8 | MW367417                                                                                                                                                                                                                                                                                                                                                                                                                                                                                                                                                                                                                                                                                                                                                                                                                                           |
| VC_873_9 | MW250786                                                                                                                                                                                                                                                                                                                                                                                                                                                                                                                                                                                                                                                                                                                                                                                                                                           |
| VC_874_0 | OK136181,OK181860,OK181862                                                                                                                                                                                                                                                                                                                                                                                                                                                                                                                                                                                                                                                                                                                                                                                                                         |
| VC_875_0 | MH444512,MK932884                                                                                                                                                                                                                                                                                                                                                                                                                                                                                                                                                                                                                                                                                                                                                                                                                                  |
| VC_877_0 | MG941013,MW073100                                                                                                                                                                                                                                                                                                                                                                                                                                                                                                                                                                                                                                                                                                                                                                                                                                  |
| VC_881_0 | MH371108,MH371109,MH536823,MZ355724,MZ456035,ON260827,ON970603                                                                                                                                                                                                                                                                                                                                                                                                                                                                                                                                                                                                                                                                                                                                                                                     |
| VC_881_1 | KJ173786,MH271300,MH271307,MH271310,MH271316,MH399779,MK376963,MK919474,MK937596,MN096374,MN908690,MZ622166,OP068333                                                                                                                                                                                                                                                                                                                                                                                                                                                                                                                                                                                                                                                                                                                               |
| VC_882_0 | KU160638,KU160639,KU160647,KU160663,KU160666,MF185731,MN234164,MN234217,MN234224,MT310874,MT986028                                                                                                                                                                                                                                                                                                                                                                                                                                                                                                                                                                                                                                                                                                                                                 |
| VC_883_0 | MF668275,MN234178,MZ923504,MZ955870,OV696619                                                                                                                                                                                                                                                                                                                                                                                                                                                                                                                                                                                                                                                                                                                                                                                                       |
| VC_885_0 | MH019215,MH019216,MK305891,MT498037,MT498053,MT897908,MT936332,MZ648033,MZ648036                                                                                                                                                                                                                                                                                                                                                                                                                                                                                                                                                                                                                                                                                                                                                                   |
| VC_886_0 | MN023176,MN023177,MN023178,MN023179,MN023180,MN023181,MN023182,MN023183,MN023184,MN023185,MN023186,MN023187,MN023188,MN023189,MN023190,MN023191                                                                                                                                                                                                                                                                                                                                                                                                                                                                                                                                                                                                                                                                                                    |
| VC_888_0 | JQ659259,KC013021,KC013022,KC013023,KC013024,KC013025,KX555527,MN552146,OV696621                                                                                                                                                                                                                                                                                                                                                                                                                                                                                                                                                                                                                                                                                                                                                                   |
| VC_89_0  | FJ230960,KF669649,KY368639,MT601270,MT601271,MW001214,MZ751040,OM236513                                                                                                                                                                                                                                                                                                                                                                                                                                                                                                                                                                                                                                                                                                                                                                            |
| VC_89_1  | KC595512,KC595513,KF554508                                                                                                                                                                                                                                                                                                                                                                                                                                                                                                                                                                                                                                                                                                                                                                                                                         |
| VC_89_2  | MH884511                                                                                                                                                                                                                                                                                                                                                                                                                                                                                                                                                                                                                                                                                                                                                                                                                                           |
| VC_891_0 | KP876465,KP876466,KT989433,KU189325,KU530220,KY365739,MF975638,MH178381,MH178382,MK686071,ON526979                                                                                                                                                                                                                                                                                                                                                                                                                                                                                                                                                                                                                                                                                                                                                 |
| VC_892_0 | MK804893,MK813939                                                                                                                                                                                                                                                                                                                                                                                                                                                                                                                                                                                                                                                                                                                                                                                                                                  |
| VC_892_1 | MK813938                                                                                                                                                                                                                                                                                                                                                                                                                                                                                                                                                                                                                                                                                                                                                                                                                                           |
| VC_892_2 | MK813941                                                                                                                                                                                                                                                                                                                                                                                                                                                                                                                                                                                                                                                                                                                                                                                                                                           |
| VC_892_3 | OM033134,OM033135                                                                                                                                                                                                                                                                                                                                                                                                                                                                                                                                                                                                                                                                                                                                                                                                                                  |



VC\_892\_4 OM033136  
VC\_893\_0 JN035618,KR063278,MW534374,ON526973  
VC\_893\_1 KU998240,MG099935,MH025889,MK450428,MK450430,MK450435,MK450436,MK494106,MK494109,MK494121,MK878903,MK919477,MK919481,ON724015,ON970582,ON970588,ON970596,ON970607,OP297547,OP434450  
VC\_893\_2 KR011062,KR011063,KR011064  
VC\_894\_0 KP790008,KP790009,KP790010,KR063279,KX557281,ON526975  
VC\_895\_0 KU963245,KU998241,MG099940,MG757152,MG757155,MG770211,MG770214,MK359302,MK433261,MK433263,MK433265,MK433267,MK801728,MK801733,MK967390,MN444874,MN945905,MT114160,MT889368,MT889370,MT889379,MT8896029,MW507132,MW507133,ON456331  
VC\_896\_0 KU963258,KU963262,KU998242,KU998243,MH576976,MK494098,MN234166,OM203156,OP434448  
VC\_897\_0 KU998253,KU998254,MH479923,MN096363  
VC\_898\_0 GU580941,GU580942  
VC\_898\_1 MC962368,MC962369,MK376953,MK376957,MN010761,MN204501,MN284896,MN284904,MN585971,MN585982,MN585988,MN585996,MT310850,MT498039,MT498052,MT521994,MW291022,MW862987,MZ005675,MZ005683,MZ171370,MZ209301,MZ388556,MZ622168,ON526971,ON970572,ON970622  
VC\_899\_0 MH153800,MK814756  
VC\_899\_1 MH153801  
VC\_9\_0 AB370205,AF424781,AP008953,AY954951,AY954952,AY954953,CP062427,CP062451,CP062454,DQ517338,DQ530359,DQ530360,EU861004,GU477322,HQ127381,JQ779024,JX274646,JX274647,KC677663,KJ716334,MG557619,MH321492,MK658834,MK801682,MK801683,MT013111,MW554488,OM439662  
VC\_90\_0 ,OM439666,OM439668,OM439670,OM439671,OM439675,ON911714,ON911715,ON911716,ON911717,ON911718  
VC\_90\_1 KT624200  
MF418016  
VC\_901\_0 KX670789,KX670790,MF467948,MF467949,MG757154,MH155877,MH155880,MH669006,MK433259,MK433260,MK433268,MK433269,MK967386,MN204492,MN204494,MN204495,MN204496,MN204497,MN204500,MN204504,MN586054,MN586056,MT310852,MT310854,MT657340,MT684589,MT684600,  
MW055905,MW145539,MW712736,ON108646  
VC\_902\_0 GU936715,HM480106,MG271909  
VC\_903\_0 KR935216,KR935217,KT253150  
VC\_904\_0 GU942563,HQ224500,KJ619459,KP972568,KP972569,KR063267,KR063268,KT728930,KT728931,MF155889  
VC\_907\_0 HB956707,HB956710,JN651747,KC107834,KT184661,KT949345,KX756572,KY318515,LN878149,MF683623,MK878892,MH179473,MH992513,MK053931,MK330684,MK838107,MK838108,MK838109,MK838110,MK838111,MN509793,MT682386,MT682387,MT682388,MT682389,MT682390,MT682391,MW  
250276,MZ592920,OL362270,OM654404,ON287377  
VC\_908\_0 HF569088,HF569089,HF569090,HF569091,HF569092,HG428758,JN939331,JN939332,KC556893,KC556894,KC556895,KC556896,KC556897,KC556898,KJ133688,KJ133689,KJ133690,KJ133691,KJ133692,KJ133693,KJ133694,KJ133695,KJ133696,KJ133697,KJ133698,KJ133699,KJ133700,KJ133701,KJ133702,KJ  
133703,KJ133704,KJ133705,KJ133706,KJ133707,KY056619,MT002975  
VC\_909\_0 HQ007973,HM150760  
VC\_91\_0 MT601273,MT601274  
VC\_91\_1 MT601272,OL580764  
VC\_91\_2 KY030782,MT366945,MT366946,MT366947,MT366948  
VC\_91\_3 AF020713  
VC\_91\_4 ON107264  
VC\_91\_5 MZ969646  
VC\_91\_6 OM236515  
VC\_910\_0 KP282679,KP282680  
VC\_911\_0 HG992588,JQ692107,JX556418,MF754113,MF754114,MF754115,MF754116,MG602476,MG893203,MH599087,MH925090,MN215888,MW451246,MW451251,MZ592922,OK483201,OK625546,OL314400,OP547477,OP595601  
VC\_912\_0 JF966203,KJ489397,KJ489398,KJ489400,KU737346,MF288922,MF498901,MH638310,MK215646  
VC\_912\_1 KF208639,KF669647,KJ489402,KT307976,KU737345,KU737347,MF765814,MN038178,MW281503,OK499976,OK499990,OM350011  
VC\_912\_2 JN790865,JN797796  
VC\_912\_3 KF669662,KY888882  
VC\_912\_4 MN153503  
VC\_912\_5 MW787012  
VC\_912\_6 OM743306  
VC\_913\_0 KJ489399,KJ489401,KT207918,KU737344,KU737348,KU737349,KU737350,KU737351,KU737352,KX147229,KX156152,KX349902,KX349903,KX961629,KX961632,MF288917,MF288918,MF288919,MF288920,MG763894,MH538193,MH638311,MN038176,MN038179,MT584805,OK500001,OM350012,OM350  
013  
VC\_913\_1 HM144387,JN654439,KC430106,KU847400,KX011169,MW392803,MW584228,MW596414  
VC\_914\_0 MW677509,MW677510,MW677512,MW677515,MW677517,MW677520,OP009272,OP009275,OP009278,OP009280,OP009286  
VC\_915\_0 MN988459,MN988558  
VC\_915\_1 MW677529  
VC\_917\_0 JF744988,JN680858,KC661276,KC691254,KF024731,KT591489,KU234099,KU997639,KX507361,KX580961,KX580962,MF140422,MF185728,MF185730,MF324910,MH779511,MH834600,MK937600,MN096380,MN234228,MN586030,MN586052,MN703406,MN703410,MT758688,MW578835,MZ171373,OL455  
899  
VC\_918\_0 KF024725,KT281791,KT281794,KT372003,MF140405,MF140413,MF140414,MF140421,MH727559,MK878900,MN096377,MT889383,MT889391,MW291024,MZ622183,ON755181  
VC\_919\_0 MH651182,MK967378,MT658805  
VC\_919\_1 MH976515,MN444870,MT684599,OK040786  
VC\_92\_0 LC597490  
VC\_92\_1 OM634661  
VC\_92\_2 EF583821  
VC\_925\_0 HM588722,KF302032,KF302033  
VC\_926\_0 KF302036,KX365748  
VC\_927\_0 KR060090,KX912252,KY379511,MF370965,MT002875  
VC\_928\_0 HM640230,JN800508,KY996523,MH999279,MW815121,OP022426  
VC\_929\_0 JQ729990,JQ729991,JQ729992,MH248069,MW057920,MZ401005,MZ401007,MZ401008,MZ401009,OL547738  
VC\_93\_0 AB609718,AP009390,AP018714,AP018715,CAJDJY010000002,CAJDJZ010000002,KJ801817,KR4049063,LC596377,LC596378,LC596379,LJ031359,MK268686,MK693030,MK721192,MN854830,MW633168,MZ420150,ON113167,ON113168,ON113169,ON286976  
VC\_93\_1 OP59178  
VC\_930\_0 MH393889,MK017820,OM638104,OP256049  
VC\_932\_0 KF623293,MW824400,MW824417,MW824421,MW824431  
VC\_933\_0 HQ316582,MG592662,MG592672  
VC\_934\_0 MW824414,MW824420,MW824427,MW824428,MW824429,MW865319,OX241434  
VC\_935\_0 JF713456,MG592585,MG592586,MG720309,MK559459,MT735629  
VC\_935\_1 HQ316604,KX198615,MT451873,ON015836  
VC\_935\_2 KY022433,MH925091,MN871506,MW411580,OK483199,OP547478,OV032860  
VC\_936\_0 MG189906,MT110073,MZ326862  
VC\_938\_0 HQ317384,HQ332142,KM233261



|          |                                                                                                                                                                                                                                                                                                                                                                                                                                                                                                                                                                                                                                                                                                                                                                                                                                                                                                                            |
|----------|----------------------------------------------------------------------------------------------------------------------------------------------------------------------------------------------------------------------------------------------------------------------------------------------------------------------------------------------------------------------------------------------------------------------------------------------------------------------------------------------------------------------------------------------------------------------------------------------------------------------------------------------------------------------------------------------------------------------------------------------------------------------------------------------------------------------------------------------------------------------------------------------------------------------------|
| VC_939_0 | MN988533,MN988538,MW980068                                                                                                                                                                                                                                                                                                                                                                                                                                                                                                                                                                                                                                                                                                                                                                                                                                                                                                 |
| VC_94_0  | CAJDKA01000002,KP339049,KY549443,LR990835,MH791397,MH880817,MN027503,MN241318,MT856905,MT909815,MW004544,MW004545,MZ147816,MZ333462,OL799258,OL799260,OL870611,OM966901,ON113170,ON125307,ON506927,ON506928                                                                                                                                                                                                                                                                                                                                                                                                                                                                                                                                                                                                                                                                                                                |
| VC_941_0 | HQ317386,MG592522,MG640035,MT720689,OM837731                                                                                                                                                                                                                                                                                                                                                                                                                                                                                                                                                                                                                                                                                                                                                                                                                                                                               |
| VC_942_0 | HQ317390,MZ568826                                                                                                                                                                                                                                                                                                                                                                                                                                                                                                                                                                                                                                                                                                                                                                                                                                                                                                          |
| VC_943_0 | HQ317390,KC821610,KC821616,KC821629,KC821630,KC821634                                                                                                                                                                                                                                                                                                                                                                                                                                                                                                                                                                                                                                                                                                                                                                                                                                                                      |
| VC_944_0 | KM873719,KY951963,KY951964,KY979235,KY979236,KY979237,KY979238,KY979239,KY979240,KY979241,KY979242,KY979243,KY979244,KY979245,KY979246,KY979247,KY992519,KY992520,MK756083,MK756084,MK756085,MK756086,MK756087,MK756088,MK756089,MK756090,MK756091,MK756092,MK756093,MK756094,MK756095,MK756096,MT431535,MT585273,MT585274,MT585275,MT585276,MT585277,MT585278,MT585279,MT585280,MT585281,MT585282,MT585283,MT585284,MT585285,MT585286,MT585287,MT585288,MT585289,MT585290,MT585291,MT585292,MT585293,MT585294,MT585295,MT585296,MT585297,MT585298,MT585299,MT585300,MT585301,MT585302,MT585303,MT585304,MT585305,MT585306,MT585307,MT585308,MT585309,MT585310,MT585311,MT585312,MT585313,MT585314,MT585315                                                                                                                                                                                                                |
| VC_945_0 | HQ332136,MW452941                                                                                                                                                                                                                                                                                                                                                                                                                                                                                                                                                                                                                                                                                                                                                                                                                                                                                                          |
| VC_947_0 | HQ396194,MZ995504,ON922917,ON933637                                                                                                                                                                                                                                                                                                                                                                                                                                                                                                                                                                                                                                                                                                                                                                                                                                                                                        |
| VC_95_0  | FJ822135,MT758689                                                                                                                                                                                                                                                                                                                                                                                                                                                                                                                                                                                                                                                                                                                                                                                                                                                                                                          |
| VC_952_0 | HQ403646,KU963260,KU998239,MG770215,MH271302,MH450132,MK279900,MK875791,MK875795,MK967383,MK967385,MN062716,MN234215,MN284906,MN310549,MN444871,MN444878,MN586015,MN586036,MN586049,MN586057,MT776808,MT776809,MT776810,MT889367,MT889378,MW507135,MW862988,MZ150793,MZ322013,MZ622167,OK040785,OL455888,OL829977,ON970576,ON970599,ON970609,ON970621,OP297531                                                                                                                                                                                                                                                                                                                                                                                                                                                                                                                                                             |
| VC_953_0 | MN204493,MW822144                                                                                                                                                                                                                                                                                                                                                                                                                                                                                                                                                                                                                                                                                                                                                                                                                                                                                                          |
| VC_954_0 | HQ632857,HQ632858                                                                                                                                                                                                                                                                                                                                                                                                                                                                                                                                                                                                                                                                                                                                                                                                                                                                                                          |
| VC_955_0 | KR072689,MK291442                                                                                                                                                                                                                                                                                                                                                                                                                                                                                                                                                                                                                                                                                                                                                                                                                                                                                                          |
| VC_956_0 | MW677513,MW677516,MW677518,MW677519,MW677521,MW677522,MW677523,MW677524,OP009265,OP009266,OP009267,OP009268,OP009269,OP009270,OP009271,OP009273,OP009276,OP009277,OP009279,OP009283,OP009284,OP009287,OP009288                                                                                                                                                                                                                                                                                                                                                                                                                                                                                                                                                                                                                                                                                                             |
| VC_957_0 | MG592442,MG592450,MG592457,MG592460,MG592482,MG592483,MG592488,MG592489,MG592490,MG592502,MG592503,MG592504,MG592505,MG592516,MG592517,MG592525,MG592530,MG592532,MG592534,MG592535,MG592539,MG592543,MG592557,MG592558,MG592559,MG592576,MG59259                                                                                                                                                                                                                                                                                                                                                                                                                                                                                                                                                                                                                                                                          |
| VC_958_0 | 3,MG592594,MG592597,MG592598,MG592605,MG592606,MG592607,MG592631                                                                                                                                                                                                                                                                                                                                                                                                                                                                                                                                                                                                                                                                                                                                                                                                                                                           |
| VC_959_0 | KJ847052,KX982260,MN592896                                                                                                                                                                                                                                                                                                                                                                                                                                                                                                                                                                                                                                                                                                                                                                                                                                                                                                 |
| VC_96_0  | MG592520,OX241566,OX241570                                                                                                                                                                                                                                                                                                                                                                                                                                                                                                                                                                                                                                                                                                                                                                                                                                                                                                 |
| VC_960_0 | HM242243,OM135992                                                                                                                                                                                                                                                                                                                                                                                                                                                                                                                                                                                                                                                                                                                                                                                                                                                                                                          |
| VC_961_0 | HQ698895,KJ410740                                                                                                                                                                                                                                                                                                                                                                                                                                                                                                                                                                                                                                                                                                                                                                                                                                                                                                          |
| VC_962_0 | JF974286,JF974321,MT490303                                                                                                                                                                                                                                                                                                                                                                                                                                                                                                                                                                                                                                                                                                                                                                                                                                                                                                 |
| VC_965_0 | HQ634192,KC821604,KC821621,KC821625                                                                                                                                                                                                                                                                                                                                                                                                                                                                                                                                                                                                                                                                                                                                                                                                                                                                                        |
| VC_966_0 | HQ683709,MG209611                                                                                                                                                                                                                                                                                                                                                                                                                                                                                                                                                                                                                                                                                                                                                                                                                                                                                                          |
| VC_968_0 | KR093625,KR093626,KR093627,KR093628,KR093629,KR093630,KR093631,KR093633                                                                                                                                                                                                                                                                                                                                                                                                                                                                                                                                                                                                                                                                                                                                                                                                                                                    |
| VC_969_0 | MT119766,MT210154                                                                                                                                                                                                                                                                                                                                                                                                                                                                                                                                                                                                                                                                                                                                                                                                                                                                                                          |
| VC_97_0  | MN988536,OP028995                                                                                                                                                                                                                                                                                                                                                                                                                                                                                                                                                                                                                                                                                                                                                                                                                                                                                                          |
| VC_970_0 | MK504443,MK504446,OM293948                                                                                                                                                                                                                                                                                                                                                                                                                                                                                                                                                                                                                                                                                                                                                                                                                                                                                                 |
| VC_971_0 | MN602266,MN602267                                                                                                                                                                                                                                                                                                                                                                                                                                                                                                                                                                                                                                                                                                                                                                                                                                                                                                          |
| VC_972_0 | JN672684,KR269719,KX237515,KY780482,MN013075,MN013076,MN013078,MN013079,MN013080,MN013083,MN013087,MT701592,MW021762,MW021764,MW021765,MW042802,MW417503,MW722081,MZ428221,MZ428224,MZ598515,MZ634348,MZ634350,MZ634351,OL539450,OL539472,OL865411,OM065837,OM065838,OM065839,OM065841,OM238157,OM735690,OP611406,OV877339,OV877387,OV877766,OX335361,OX335395,OX335410                                                                                                                                                                                                                                                                                                                                                                                                                                                                                                                                                    |
| VC_973_0 | JF501022,KP658157,KR262148,KT001920,KY575286,LR757892,MF415412,MF612072,MG552615,MG894052,MH445453,MH633484,MH633485,MH633486,MH633487,MH688453,MH844531,MK170446,MK278861,MK521904,MK618657,MK931442,MK931443,MK931444,MK931445,MN379832,MN395285,MN395286,MN689779,MN783016,MT894005,MW655991,MW672037,MZ172460,MZ221764,MZ339824,MZ428222,MZ428223,MZ428225,MZ428226,MZ428227,MZ428228,MZ571831,MZ571833,MZ571834,MZ634345,MZ634346,OK138555,OK655936,OL539448,OL539460,OL674249,OL702938,OL744210,OL744213,OM032871,OM065840,OM065842,OM065843,OM687893,OM938991,OM938992,OM964875,OM489264,ON602735,ON602741,ON602750,ON881905,OP267563,OP413832,OP617742,OU342755,OW251746,OX335369,OX335370,OX335371,OX335380,OX335381,OX335383,OX335384,OX335385,OX335386,OX335387,OX335388,OX335391,OX335393,OX335400,OX335404,OX335411,OX335412,OX335417,OX335421,OX335422,OX335423,OX335429,OX335430,OX335432,OX335435,OX335439 |
| VC_974_0 | JF704100,KJ538721,KX159477,MG757167,MH727553,MH727562,MK061407,MK279842,MK305892,MK494123,MN329674,MN329676,MN428056,MN428061,ON637772                                                                                                                                                                                                                                                                                                                                                                                                                                                                                                                                                                                                                                                                                                                                                                                     |
| VC_975_0 | JF704107,JN083852,JN083853,JN408459,JQ684677,JX042578,KF017001,KF493882,KF560330,KM101118,KT004677,KT246486,KT438501,MG099934,MG099937,MG099938,MG099944,MG099949,MH020239,MH051250,MH051254,MH051256,MH338235,MH338241,MK305887,MK494091,MN096372,MN586016,MN586060,MN586062,MN617844,OL455889,ON970625,ON970626                                                                                                                                                                                                                                                                                                                                                                                                                                                                                                                                                                                                          |
| VC_976_0 | KC710998,MG065636,MG065640,MG065641,MG065643,MG065649,MG065657,MG065663,MG065665,MG065667,MG065669,MG065670,MG065671,MG065673,MG065675,MG065679,MG065680,MG065681,MG065687,MK373798,MN055691,MN432485,MN850567,MN850569,MN850572,MN850591,MN850600,MN850602,MN850607,MN850640,MT074433,MT127619,MT360681,MZ501079,MZ501090,OK272479,OK272487,OL539459,ON185589,ON528718                                                                                                                                                                                                                                                                                                                                                                                                                                                                                                                                                    |
| VC_977_0 | LR027385,LR027388,LR596614,LT841304,LT961732,MF564201,MK962751,MN781674,MN850582,MN850586,MN850596,MN850604,MN850606,MN850613,MN850620,MN850634,MN850638,MN850641,MN850643,MZ234033,MZ501069,MZ501101,OK272471,OK272478,OK272481,OK272483,OK272485,OK272486,OK272489,OL539445,OL539446,ON185586,ON185587,ON185588,ON711395,OU734268                                                                                                                                                                                                                                                                                                                                                                                                                                                                                                                                                                                        |
| VC_978_0 | JF917095,JQ010983                                                                                                                                                                                                                                                                                                                                                                                                                                                                                                                                                                                                                                                                                                                                                                                                                                                                                                          |
| VC_98_0  | MG592398,MG592496,MG592497,MG592584,MG592612,MG592613                                                                                                                                                                                                                                                                                                                                                                                                                                                                                                                                                                                                                                                                                                                                                                                                                                                                      |
| VC_980_0 | AB626962,AB626963,AF513032,AY549449,EU136189,HF9737074,KJ210330,KM366100,KU992911,KY000084,KY000085,LC709172,MG766218,MG766219,MH107118,MH972260,MK764384,MK903033,MK922546,MK922547,MK922548,MK936475,MK936476,MN098325,MN150710,MT926124,MW286254,MW363799,MZ359091                                                                                                                                                                                                                                                                                                                                                                                                                                                                                                                                                                                                                                                      |
| VC_981_0 | JX483876,JX483877,JX483878,MN988482,MN988500,MN988501,MN988508,MN988530,MN988545,MN988549,MW980073                                                                                                                                                                                                                                                                                                                                                                                                                                                                                                                                                                                                                                                                                                                                                                                                                         |
| VC_982_0 | MG592429,MG592438,MG592487,MG592566,MG592654,MG592657,MG592658,MG592659,MZ369152                                                                                                                                                                                                                                                                                                                                                                                                                                                                                                                                                                                                                                                                                                                                                                                                                                           |
| VC_984_0 | MK291441,MK291443,MK291444                                                                                                                                                                                                                                                                                                                                                                                                                                                                                                                                                                                                                                                                                                                                                                                                                                                                                                 |
| VC_985_0 | JN116822,MG812496,MH271296,MK660712,MN234213                                                                                                                                                                                                                                                                                                                                                                                                                                                                                                                                                                                                                                                                                                                                                                                                                                                                               |
| VC_986_0 | KT355471,KT355473,KT355475,KT783672,KU160655,KU160657,KU160658,KU160667,KU160670,KU160674,KX443695,KX576642,KX610765,KY434670,MF140409,MF140415,MF140417,MF140419,MF140420,MF140426,MF140429,MF140431,MF140433,MH576948,MH576950,MH576951,MH576952,MH576955,MH576957,MH576961,MH779506,MK494103,MK494111,MK737943,MK820640,MN617842,MN813695,ON970580                                                                                                                                                                                                                                                                                                                                                                                                                                                                                                                                                                      |
| VC_987_0 | MH834594,MH834597,MH834628                                                                                                                                                                                                                                                                                                                                                                                                                                                                                                                                                                                                                                                                                                                                                                                                                                                                                                 |
| VC_988_0 | JN116828,MW654182                                                                                                                                                                                                                                                                                                                                                                                                                                                                                                                                                                                                                                                                                                                                                                                                                                                                                                          |
| VC_989_0 | JN116823,MK967393                                                                                                                                                                                                                                                                                                                                                                                                                                                                                                                                                                                                                                                                                                                                                                                                                                                                                                          |
| VC_99_0  | KU963261,MH399781,MH509446,MK279893,MK305885,MK359319,MK376958,MK967392,MW291015,MW534376,MZ005677,ON637762,ON637763                                                                                                                                                                                                                                                                                                                                                                                                                                                                                                                                                                                                                                                                                                                                                                                                       |
| VC_990_0 | AY212251,KJ528544,LC628082,LC644557,ON637248                                                                                                                                                                                                                                                                                                                                                                                                                                                                                                                                                                                                                                                                                                                                                                                                                                                                               |
| VC_991_0 | MZ322021,ON970578,OP297535                                                                                                                                                                                                                                                                                                                                                                                                                                                                                                                                                                                                                                                                                                                                                                                                                                                                                                 |
| VC_992_0 | JN116826,JN116827,KT372002,KT375356,KT959213,KT990218,KX550082,KX611788,KX712236,KX712237,KY549153,KY549154,MF189179,MF324898,MF324900,MF324901,MF324902,MF324903,MF324904,MF324905,MF373842,MF37628,MH271291,MH271293,MH271294,MH271297,MH271299,MH271309,MH271311,MH271314,MH271315,MH271319,MH316569,MK524487,MK524495,MN945902,MW291027,MZ402608                                                                                                                                                                                                                                                                                                                                                                                                                                                                                                                                                                       |
| VC_993_0 | JN175269                                                                                                                                                                                                                                                                                                                                                                                                                                                                                                                                                                                                                                                                                                                                                                                                                                                                                                                   |
| VC_994_0 | KU862660                                                                                                                                                                                                                                                                                                                                                                                                                                                                                                                                                                                                                                                                                                                                                                                                                                                                                                                   |
| VC_994_1 | MW570842,MW584170,MW584191                                                                                                                                                                                                                                                                                                                                                                                                                                                                                                                                                                                                                                                                                                                                                                                                                                                                                                 |
| VC_994_2 | JX094500,KX397367,KX397372,MK514282,MW845759                                                                                                                                                                                                                                                                                                                                                                                                                                                                                                                                                                                                                                                                                                                                                                                                                                                                               |
| VC_994_3 | KX397368,KX397370,KX397371,MT710307,MW384823,MW812340,MW812342,MW812343                                                                                                                                                                                                                                                                                                                                                                                                                                                                                                                                                                                                                                                                                                                                                                                                                                                    |
| VC_994_4 | KX397365,KX397366,MW760841,MW812338,MW812341                                                                                                                                                                                                                                                                                                                                                                                                                                                                                                                                                                                                                                                                                                                                                                                                                                                                               |
| VC_994_5 | KX397369,MH426724,MW845758                                                                                                                                                                                                                                                                                                                                                                                                                                                                                                                                                                                                                                                                                                                                                                                                                                                                                                 |
| VC_994_6 | JX316028,KX397364,KX397373                                                                                                                                                                                                                                                                                                                                                                                                                                                                                                                                                                                                                                                                                                                                                                                                                                                                                                 |
| VC_994_7 | JN641803,KU726251,LR535902,LR535909,LR535910,LR535914,LR535915,LR535916,LR535918,LR535919,LR535920,LR535921,MH221129,MN445185,MT679221,MT799840,MW812339,OK428535,OM454642                                                                                                                                                                                                                                                                                                                                                                                                                                                                                                                                                                                                                                                                                                                                                 |
| VC_994_8 | MH221128                                                                                                                                                                                                                                                                                                                                                                                                                                                                                                                                                                                                                                                                                                                                                                                                                                                                                                                   |



|          |                                     |
|----------|-------------------------------------|
| VC_996_0 | KX344510,KY264020,MW344767          |
| VC_997_0 | KY965934,MG550110,MG550111,MG550113 |
| VC_998_0 | JN882267,OM621814                   |



**Table S7-4. VCs\_ME-vOTUs\_ref**

| VC        | Members                                                                                                                                                                                                                                                                                                                                                                   |
|-----------|---------------------------------------------------------------------------------------------------------------------------------------------------------------------------------------------------------------------------------------------------------------------------------------------------------------------------------------------------------------------------|
| VC_1229_0 | KX077892,KX077893,OL774866,OL774876,S9_vf_90866                                                                                                                                                                                                                                                                                                                           |
| VC_1252_0 | LR596902,S5_vs_120079                                                                                                                                                                                                                                                                                                                                                     |
| VC_1252_1 | S5_vs_122344                                                                                                                                                                                                                                                                                                                                                              |
| VC_1267_0 | LT986678,MC945141,MC945453,MC945455,MC945456,MC945498,MC945509,MC945564,MC945664,MC945680,MC945683,MC945713,MC945716,MC945730,MC945784,MC945790,MC945813,MC945845,MK765557,MK765655,MK765661,MK765667,OM869561,OM869610,S3_vs_127442,S3_vs_77156                                                                                                                          |
| VC_1335_0 | MG945494,MC945563,MC945585,MK765590,MN379638,MT135333,MT135379,MT135391,MT135401,MT135437,MT135445,OM869668,S7_vs_135828                                                                                                                                                                                                                                                  |
| VC_1385_0 | MG945598,OM869551,OM869556,S1_vs_3435                                                                                                                                                                                                                                                                                                                                     |
| VC_1435_0 | ON920540,S11_vf_66522                                                                                                                                                                                                                                                                                                                                                     |
| VC_1492_0 | MT135285,MT135289,MT135297,MT135302,MT135308,MT135314,S3_vf_127431,S9_vf_90852                                                                                                                                                                                                                                                                                            |
| VC_275_0  | AF195902,DQ320509,HE956704,KF767351,MN830257,S14_vf_106156                                                                                                                                                                                                                                                                                                                |
| VC_315_0  | MF041990,MN830256,S14_vf_72953,X98106                                                                                                                                                                                                                                                                                                                                     |
| VC_344_0  | FN391954,KT337342,KY065453,KY065454,KY065458,KY065459,KY065460,KY065461,KY065462,KY065463,KY065469,KY065470,KY065471,KY065494,KY065495,KY065499,MK448725,MK448732,MK448739,MK448830,MK448842,MK448894,MK448901,MK448912,MK448914,MK448918,MK448920,MT900487,OL774868,S9_vf_15012                                                                                          |
| VC_349_0  | HQ332138,KU517658,MF595878,S11_vs_8456,S5_vs_20268                                                                                                                                                                                                                                                                                                                        |
| VC_390_0  | EU409559,S14_vf_78139                                                                                                                                                                                                                                                                                                                                                     |
| VC_425_0  | AJ302074,DQ113772,HP563658,JX879087,KC413988,KT337358,KT337364,KT388093,KX550065,KY065455,KY065479,KY065487,KY065490,KY065491,KY065492,KY065493,KY065501,KY065502,KY349816,MK448671,MK448708,MK448714,MK448831,MK448834,MK448861,MK448874,MK448875,MK448886,MK448887,MK448897,MK448898,MK448905,MK448925,MK448927,MK449006,MK449009,MT900488,MW495853,OL774873,S9_vf_4115 |
| VC_492_0  | AY150271,DQ126339,IN391180,JQ011317,JQ691610,KC911856,KC911857,KP869107,KP869108,KX231829,MK416010,MK422448,MN187550,MT261384,MT580116,MT580117,MW205203,MW722083,OK490417,S5_vf_74661                                                                                                                                                                                    |
| VC_5_0    | AB374228,AF125163,AY027935,BHU24159,DQ114220,DQ674738,HG803181,HQ110083,KF361475,KT887559,KU504502,KX058879,KX774374,KY045851,LR597637,LR597638,LR597640,LR597649,MG592573,MK972712,MK972713,MK972714,MN563793,MT662115,OM095401,OP484843,S11_vs_5077                                                                                                                     |
| VC_560_0  | KC139518,KT287080,MF158036,MF158037,MH424444,MK214385,MK479295,MN070121,MN393079,MT012729,MW725301,MZ004649,MZ501269,ON720976,S17_vf_177199                                                                                                                                                                                                                               |
| VC_642_0  | EF579802,KX911187,S7_vs_73280                                                                                                                                                                                                                                                                                                                                             |
| VC_940_0  | JQ177062,S11_vs_104032                                                                                                                                                                                                                                                                                                                                                    |



**Table S7-5. VCs\_ME-vOTUs\_only**

| VC        | Members                                                                     |
|-----------|-----------------------------------------------------------------------------|
| VC_1035_0 | S14_vs_88666,S5_vs_3501                                                     |
| VC_1045_0 | S11_vf_104071,S3_vs_127413                                                  |
| VC_1242_0 | S3_vs_68031                                                                 |
| VC_1264_0 | S11_vs_75554                                                                |
| VC_1292_0 | S13_vf_38708                                                                |
| VC_1560_0 | S3_vs_45147,S9_vs_83108                                                     |
| VC_1587_0 | S5_vs_13090,S5_vs_139401,S5_vs_17520,S5_vs_28263,S7_vs_100640               |
| VC_1594_0 | S7_vs_135679                                                                |
| VC_1613_0 | S3_vs_50924,S5_vs_140946,S9_vs_58402                                        |
| VC_1615_0 | S5_vs_145593,S7_vf_138019                                                   |
| VC_21_0   | S14_vf_117150,S3_vf_127405                                                  |
| VC_430_0  | S3_vf_106401,S5_vf_28061                                                    |
| VC_640_0  | S9_vs_90846                                                                 |
| VC_643_0  | S11_vs_104047,S3_vs_29077                                                   |
| VC_660_0  | S5_vs_138980,S7_vs_69630                                                    |
| VC_720_0  | S14_vf_72335,S14_vs_59347,S3_vs_127387,S7_vf_114476,S7_vs_13041,S7_vs_47050 |
| VC_747_0  | S3_vs_98675,S5_vs_137154                                                    |
| VC_759_0  | S11_vf_104052,S11_vf_10907                                                  |
| VC_920_0  | S14_vs_73301,S5_vs_83886                                                    |



**Table S7-6. VCs\_SHHC-vOTUs\_ref**

| VC        | Members                                                                                                                                                                                                                  |
|-----------|--------------------------------------------------------------------------------------------------------------------------------------------------------------------------------------------------------------------------|
| VC_1161_0 | KT264782,KT264783,KT264833,MG945154,MG945472,MG945534,MG945826,MK496812,MK496813,MK765559,MK765603,MK765621,MK765669,MZ089756,MZ089773,S12_vs_188832                                                                     |
| VC_1170_0 | KT264791,KT264792,KT264793,KX513868,KX513877,MG945162,MG945233,MG945334,MG945383,MG945430,MG945447,MG945514,MG945642,MG945694,MG945753,MG945781,MT135277,MZ821031,S8_vf_208119                                           |
| VC_1184_0 | KT264818,KT264819,KX513867,KX513872,KX513874,MG945573,MG945759,MG945760,MG945811,S8_vf_208146                                                                                                                            |
| VC_1485_0 | MT006234,MT006235,S16_vf_173109                                                                                                                                                                                          |
| VC_249_0  | KT588074,MK340941                                                                                                                                                                                                        |
| VC_249_1  | KT630649,MK416007,MK416019,MK422455,MK433579,MK448230,MN098327,MN166823,MT135176,MT701587,MW057855,OK665842,OL791266,OM284015,OM621816,ON470579,ON470582,ON470588,ON470593,OP114732,S4_vs_VIRSorter_31980-circular-cat_2 |



**Table S7-7. VCs\_SHHC-vOTUs\_only**

| VC        | Members                                  |
|-----------|------------------------------------------|
| VC_1230_0 | S12_vs_5857,S16_vs_19320                 |
| VC_1434_0 | S16_vs_15093                             |
| VC_1477_0 | S16_vf_90328,S8_vf_13758                 |
| VC_1477_1 | S12_vs_172379                            |
| VC_1553_0 | S12_vs_111815,S12_vs_188820              |
| VC_1566_0 | S10_vs_120489,S12_vs_188823,S8_vs_193843 |



Table S7-8. VCs\_shared\_vOTUs\_Ref

| VC        | Members                                                                                                                                                                                                                                                                                                                                                                                                                                                                                                                                                                                                                                                                                                                                                                                                                                                                                                                                                                                                                                                                                                                                                                                                                                                                                                                                                                                                                                                                                                |
|-----------|--------------------------------------------------------------------------------------------------------------------------------------------------------------------------------------------------------------------------------------------------------------------------------------------------------------------------------------------------------------------------------------------------------------------------------------------------------------------------------------------------------------------------------------------------------------------------------------------------------------------------------------------------------------------------------------------------------------------------------------------------------------------------------------------------------------------------------------------------------------------------------------------------------------------------------------------------------------------------------------------------------------------------------------------------------------------------------------------------------------------------------------------------------------------------------------------------------------------------------------------------------------------------------------------------------------------------------------------------------------------------------------------------------------------------------------------------------------------------------------------------------|
| VC_1145_0 | KT264749,KT264750,KT264751,KT264752,KT264753,KT264754,KT264755,KT264756,KT264757,KT264758,KT264759,KT264760,KT264761,KT264763,KT264764,KT264765,KT264766,KT264767,KT264768,KT264769,KT264771,KT264772,KT264774,KT264779,KX513865,MG025518,MG641179,MG641180,MG641186,MG883717,MC945153,MC945158,MC945163,MC945190,MC945203,MC945205,MC945207,MC945213,MC945227,MC945237,MC945238,MC945318,MC945325,MC945330,MC945333,MC945346,MC945351,MC945355,MC945361,MC945387,MC945398,MC945402,MC945407,MC945415,MC945424,MC945429,MC945433,MC945438,MC945444,MC945459,MC945461,MC945467,MC945476,MC945486,MC945499,MC945508,MC945517,MC945526,MC945531,MC945541,MC945548,MC945559,MC945565,MC945566,MC945570,MC945586,MC945587,MC945589,MC945592,MC945596,MC945602,MC945646,MC945671,MC945673,MC945674,MC945681,MC945691,MC945699,MC945705,MC945708,MC945710,MC945715,MC945728,MC945731,MC945744,MC945758,MC945761,MC945765,MC945768,MC945770,MC945786,MC945787,MC945793,MC945796,MC945801,MC945802,MC945820,MC945853,MC945855,MC945862,MC945864,MC945869,MK765620,MT135257,MT135263,MT135264,MT135272,MT135273,MT135278,MT135338,MZ089765,MZ089767,MZ089774,MZ089775,MZ089776,OM869524,OM869525,OM869526,OM869527,OM869528,OM869531,OM869533,OM869534,OM869535,OM869536,OM869537,OM869538,OM869543,OM869546,OM869547,OM869550,OM869606,OM869641,OM869642,OM869643,OM869644,OM869645,OM869664,OM869697,OM869698,OM869699,OM869700,OM869701,OM869703,OM869704,OP549869,OP549872,OP549875,S3_vf_127426,S8_vf_94361 |
|           | MG711460,S11_vs_52577,S14_vf_58919,S17_vf_97671,S5_vf_134040,S7_vf_39724,S8_vs_134805                                                                                                                                                                                                                                                                                                                                                                                                                                                                                                                                                                                                                                                                                                                                                                                                                                                                                                                                                                                                                                                                                                                                                                                                                                                                                                                                                                                                                  |
|           | MG945488,MC945572,MZ089802,OP549867,S10_vs_43473,S14_vf_37500,S9_vf_26805                                                                                                                                                                                                                                                                                                                                                                                                                                                                                                                                                                                                                                                                                                                                                                                                                                                                                                                                                                                                                                                                                                                                                                                                                                                                                                                                                                                                                              |
| VC_1334_0 | GU967410,MF893271,MH844558,MW476490,S12_vs_48045,S9_vf_73311                                                                                                                                                                                                                                                                                                                                                                                                                                                                                                                                                                                                                                                                                                                                                                                                                                                                                                                                                                                                                                                                                                                                                                                                                                                                                                                                                                                                                                           |
| VC_145_0  | KX965989                                                                                                                                                                                                                                                                                                                                                                                                                                                                                                                                                                                                                                                                                                                                                                                                                                                                                                                                                                                                                                                                                                                                                                                                                                                                                                                                                                                                                                                                                               |
| VC_145_1  | S12_vf_188824,S13_vf_151045,S15_vf_74586,S16_vf_169985,S3_vf_18829,S4_vf_27861                                                                                                                                                                                                                                                                                                                                                                                                                                                                                                                                                                                                                                                                                                                                                                                                                                                                                                                                                                                                                                                                                                                                                                                                                                                                                                                                                                                                                         |
| VC_1490_0 | MT121964,S13_vf_56074,S15_vf_20644,S3_vf_127406,S3_vs_127445,S8_vf_147128                                                                                                                                                                                                                                                                                                                                                                                                                                                                                                                                                                                                                                                                                                                                                                                                                                                                                                                                                                                                                                                                                                                                                                                                                                                                                                                                                                                                                              |
| VC_1490_1 | MT135292,MT135293,MT135296,MT135305,S12_vf_188838,S13_vf_150407                                                                                                                                                                                                                                                                                                                                                                                                                                                                                                                                                                                                                                                                                                                                                                                                                                                                                                                                                                                                                                                                                                                                                                                                                                                                                                                                                                                                                                        |
| VC_1495_0 | AP009630,AF011378,DQ054536,DQ227763,DQ227764,EU221285,FJ848881,FJ848882,FJ848883,FJ848884,FJ848885,GQ979703,KC182542,KC182543,KC182544,KC182545,KC182546,KC182547,KC182548,KC182549,KC182550,KC182551,KC182552,KC522412,KF676640,KM091442,KP793104,KP793105,KP793108,KP793109,KP793111,KP793113,KP793115,KP793116,KP793117,KP793118,KP793123,KP793124,KP793129,KP793134,KX346246,KX379667,KX379668,KX379670,KX379671,KY554760,KY554761,MP346933,MP448554,MP448555,MP448556,MP448557,MP448558,MP448559,MP448560,MP448561,MP448562,MP448563,MP448564,MP448565,MP448566,MP448567,MP448568,MP448569,MP448570,MP448571,MP448572,MP775703,MP775704,MP775705,MG253647,MG253648,MG253649,MG253650,MG253651,MG253652,MG253653,MG309717,MG309718,MK301437,MN552148,MN552149,MN552150,MN689514,MN689517,MN689518,MN689519,MN689520,MN689522,MN689523,MN689524,MN689525,MW032477,MW041632,MW041633,MW041634,MW041635,MW041636,MW041637,MW041638,MW041639,MW041640,S3_vf_96222,S5_vf_25423,S8_vf_45776                                                                                                                                                                                                                                                                                                                                                                                                                                                                                                              |
| VC_210_0  | S11_vf_104035,S13_vf_11246                                                                                                                                                                                                                                                                                                                                                                                                                                                                                                                                                                                                                                                                                                                                                                                                                                                                                                                                                                                                                                                                                                                                                                                                                                                                                                                                                                                                                                                                             |
| VC_519_0  | MT774405                                                                                                                                                                                                                                                                                                                                                                                                                                                                                                                                                                                                                                                                                                                                                                                                                                                                                                                                                                                                                                                                                                                                                                                                                                                                                                                                                                                                                                                                                               |
| VC_519_1  | MT774379,S4_vf_31981                                                                                                                                                                                                                                                                                                                                                                                                                                                                                                                                                                                                                                                                                                                                                                                                                                                                                                                                                                                                                                                                                                                                                                                                                                                                                                                                                                                                                                                                                   |
| VC_519_10 | MT774375,MT774376,MT774380,MT774382,S13_vf_143422,S17_vf_81232,S4_vf_4838                                                                                                                                                                                                                                                                                                                                                                                                                                                                                                                                                                                                                                                                                                                                                                                                                                                                                                                                                                                                                                                                                                                                                                                                                                                                                                                                                                                                                              |
| VC_519_11 | MT774396                                                                                                                                                                                                                                                                                                                                                                                                                                                                                                                                                                                                                                                                                                                                                                                                                                                                                                                                                                                                                                                                                                                                                                                                                                                                                                                                                                                                                                                                                               |
| VC_519_12 | MT774407,S3_vf_115304                                                                                                                                                                                                                                                                                                                                                                                                                                                                                                                                                                                                                                                                                                                                                                                                                                                                                                                                                                                                                                                                                                                                                                                                                                                                                                                                                                                                                                                                                  |
| VC_519_2  | MT774404                                                                                                                                                                                                                                                                                                                                                                                                                                                                                                                                                                                                                                                                                                                                                                                                                                                                                                                                                                                                                                                                                                                                                                                                                                                                                                                                                                                                                                                                                               |
| VC_519_3  | MT774400                                                                                                                                                                                                                                                                                                                                                                                                                                                                                                                                                                                                                                                                                                                                                                                                                                                                                                                                                                                                                                                                                                                                                                                                                                                                                                                                                                                                                                                                                               |
| VC_519_4  | MT774397,S8_vf_131802                                                                                                                                                                                                                                                                                                                                                                                                                                                                                                                                                                                                                                                                                                                                                                                                                                                                                                                                                                                                                                                                                                                                                                                                                                                                                                                                                                                                                                                                                  |
| VC_519_5  | MT774395,S9_vf_76769                                                                                                                                                                                                                                                                                                                                                                                                                                                                                                                                                                                                                                                                                                                                                                                                                                                                                                                                                                                                                                                                                                                                                                                                                                                                                                                                                                                                                                                                                   |
| VC_519_6  | S10_vf_3644,S3_vf_25163                                                                                                                                                                                                                                                                                                                                                                                                                                                                                                                                                                                                                                                                                                                                                                                                                                                                                                                                                                                                                                                                                                                                                                                                                                                                                                                                                                                                                                                                                |
| VC_519_7  | MT774399,MT774403                                                                                                                                                                                                                                                                                                                                                                                                                                                                                                                                                                                                                                                                                                                                                                                                                                                                                                                                                                                                                                                                                                                                                                                                                                                                                                                                                                                                                                                                                      |
| VC_519_8  | MT774398                                                                                                                                                                                                                                                                                                                                                                                                                                                                                                                                                                                                                                                                                                                                                                                                                                                                                                                                                                                                                                                                                                                                                                                                                                                                                                                                                                                                                                                                                               |
| VC_519_9  | S14_vs_66139,S5_vs_40848                                                                                                                                                                                                                                                                                                                                                                                                                                                                                                                                                                                                                                                                                                                                                                                                                                                                                                                                                                                                                                                                                                                                                                                                                                                                                                                                                                                                                                                                               |
| VC_649_0  | MF172979,MK448667,MK448700,MK448720,MK448839,MK448841,MK448843,MK448934,MK448997,MW387018,S11_vs_42927,S13_vs_23314,S14_vs_96111,S5_vs_8847                                                                                                                                                                                                                                                                                                                                                                                                                                                                                                                                                                                                                                                                                                                                                                                                                                                                                                                                                                                                                                                                                                                                                                                                                                                                                                                                                            |
| VC_649_1  | S13_vs_30167,S3_vs_119605                                                                                                                                                                                                                                                                                                                                                                                                                                                                                                                                                                                                                                                                                                                                                                                                                                                                                                                                                                                                                                                                                                                                                                                                                                                                                                                                                                                                                                                                              |
| VC_649_2  | S13_vs_30101,S8_vs_149700                                                                                                                                                                                                                                                                                                                                                                                                                                                                                                                                                                                                                                                                                                                                                                                                                                                                                                                                                                                                                                                                                                                                                                                                                                                                                                                                                                                                                                                                              |
| VC_649_3  | S8_vs_115958                                                                                                                                                                                                                                                                                                                                                                                                                                                                                                                                                                                                                                                                                                                                                                                                                                                                                                                                                                                                                                                                                                                                                                                                                                                                                                                                                                                                                                                                                           |
| VC_649_4  | S9_vs_90727                                                                                                                                                                                                                                                                                                                                                                                                                                                                                                                                                                                                                                                                                                                                                                                                                                                                                                                                                                                                                                                                                                                                                                                                                                                                                                                                                                                                                                                                                            |
| VC_649_5  | KX190832,S11_vs_104038,S11_vs_81775,S16_vs_124703,S16_vs_4662,S4_vf_13759,S6_vs_33711,S6_vs_38250,S7_vs_56529,S8_vs_175235,S8_vs_176720,S9_vs_45812                                                                                                                                                                                                                                                                                                                                                                                                                                                                                                                                                                                                                                                                                                                                                                                                                                                                                                                                                                                                                                                                                                                                                                                                                                                                                                                                                    |
| VC_667_0  | BK010471,MH616963,MK069403,MK238400,MT006214,MT774381,MT774383,MT774386,MW067000,MW067001,MW067002,MW067003,S11_vf_104059,S11_vf_43997,S12_vs_14927,S3_vf_17748,S8_vf_158225,S8_vf_87755                                                                                                                                                                                                                                                                                                                                                                                                                                                                                                                                                                                                                                                                                                                                                                                                                                                                                                                                                                                                                                                                                                                                                                                                                                                                                                               |
| VC_691_0  | MH552500,MT774384,MT774394,S8_vf_166677,S9_vf_51656                                                                                                                                                                                                                                                                                                                                                                                                                                                                                                                                                                                                                                                                                                                                                                                                                                                                                                                                                                                                                                                                                                                                                                                                                                                                                                                                                                                                                                                    |
| VC_691_1  | BK010646,S10_vs_58014,S11_vs_3277,S11_vs_58930,S11_vs_84848,S11_vs_98193,S12_vs_141337,S12_vs_23796,S17_vs_2079,S2_vs_10289,S3_vs_119660,S5_vs_123256,S5_vs_76500,S7_vs_11081,S8_vf_117796,S8_vs_99362,S9_vs_21850                                                                                                                                                                                                                                                                                                                                                                                                                                                                                                                                                                                                                                                                                                                                                                                                                                                                                                                                                                                                                                                                                                                                                                                                                                                                                     |
| VC_695_1  | S5_vs_131510                                                                                                                                                                                                                                                                                                                                                                                                                                                                                                                                                                                                                                                                                                                                                                                                                                                                                                                                                                                                                                                                                                                                                                                                                                                                                                                                                                                                                                                                                           |
| VC_706_0  | C2PVCG,KX373685,KX373686,KX373687,KX373688,KX373689,KX373690,KX373691,KX373692,L67CG,MF443119,MF443120,MF443121,MF443122,MF443123,MF443124,MF443125,MF443126,MH779518,MH779519,MH779520,MH779521,MH779522,MH779523,MH779524,MH779525,MH779526,MH779527,MK301442,MK301443,MN337887,MN689503,MN689504,MN689505,MN689506,MN689507,MN689508,MN689510,MN689511,MN689512,MN689513,MN689515,MN689526,MN689527,MN689528,MN689529,MN689531,MN689532,MN689533,MZ955869,S6_vf_3435,S7_vf_89197                                                                                                                                                                                                                                                                                                                                                                                                                                                                                                                                                                                                                                                                                                                                                                                                                                                                                                                                                                                                                    |
| VC_723_0  | MG711462,S10_vf_24791,S11_vs_10172,S11_vs_10172,S11_vs_23357,S11_vs_40945,S16_vf_97279,S3_vf_8058,S3_vs_1143,S3_vs_54303,S4_vs_VIRSorter_7386-circular-cat_2,S5_vs_38949,S6_vs_56496,S7_vf_5439,S7_vs_4956,S7_vs_6626,S8_vf_151384,S8_vs_47265,S9_vs_27813,S9_vs_56354                                                                                                                                                                                                                                                                                                                                                                                                                                                                                                                                                                                                                                                                                                                                                                                                                                                                                                                                                                                                                                                                                                                                                                                                                                 |
| VC_727_0  | LR596903,MG711461,S13_vs_35816,S16_vs_86116,S3_vf_99734,S4_vs_VIRSorter_8622-cat_2,S8_vs_206526,S9_vf_64844                                                                                                                                                                                                                                                                                                                                                                                                                                                                                                                                                                                                                                                                                                                                                                                                                                                                                                                                                                                                                                                                                                                                                                                                                                                                                                                                                                                            |
| VC_728_0  | MG711466,S16_vf_6102,S16_vs_18440,S3_vs_42569,S7_vs_134583,S8_vf_101283,S8_vf_170878                                                                                                                                                                                                                                                                                                                                                                                                                                                                                                                                                                                                                                                                                                                                                                                                                                                                                                                                                                                                                                                                                                                                                                                                                                                                                                                                                                                                                   |
| VC_728_1  | S5_vs_124677                                                                                                                                                                                                                                                                                                                                                                                                                                                                                                                                                                                                                                                                                                                                                                                                                                                                                                                                                                                                                                                                                                                                                                                                                                                                                                                                                                                                                                                                                           |
| VC_826_0  | KY053532,MT006236,S13_vs_113593,S13_vs_152223,S16_vf_100378,S3_vf_44405,S5_vf_77701                                                                                                                                                                                                                                                                                                                                                                                                                                                                                                                                                                                                                                                                                                                                                                                                                                                                                                                                                                                                                                                                                                                                                                                                                                                                                                                                                                                                                    |
| VC_855_0  | JQ867099,MN929097,OK632025,S10_vf_18671,S13_vf_87873,S16_vs_173102,S2_vs_7306,S3_vs_127404,S3_vs_89898,S4_vs_VIRSorter_6022-circular-cat_1,S4_vs_VIRSorter_9913-cat_1,S5_vs_1572                                                                                                                                                                                                                                                                                                                                                                                                                                                                                                                                                                                                                                                                                                                                                                                                                                                                                                                                                                                                                                                                                                                                                                                                                                                                                                                       |
| VC_879_0  | MT006237,S3_vf_70746,S4_vf_28601,S5_vs_63924,S8_vf_197061                                                                                                                                                                                                                                                                                                                                                                                                                                                                                                                                                                                                                                                                                                                                                                                                                                                                                                                                                                                                                                                                                                                                                                                                                                                                                                                                                                                                                                              |
| VC_880_0  | GQ241246,KF669650,S3_vf_54353,S8_vf_170430                                                                                                                                                                                                                                                                                                                                                                                                                                                                                                                                                                                                                                                                                                                                                                                                                                                                                                                                                                                                                                                                                                                                                                                                                                                                                                                                                                                                                                                             |
| VC_889_0  | GQ451696,KC013026,KC013027,KC013028,KC013029,KM262191,KM262192,KX578042,KX578043,KX578044,MN552147,S7_vf_63894,S8_vf_129423                                                                                                                                                                                                                                                                                                                                                                                                                                                                                                                                                                                                                                                                                                                                                                                                                                                                                                                                                                                                                                                                                                                                                                                                                                                                                                                                                                            |
| VC_967_0  | JF344709,S11_vs_93101,S15_vs_76390,S17_vs_138036,S8_vs_208129                                                                                                                                                                                                                                                                                                                                                                                                                                                                                                                                                                                                                                                                                                                                                                                                                                                                                                                                                                                                                                                                                                                                                                                                                                                                                                                                                                                                                                          |
| VC_1054_0 | MT774387,MT774390,MT774392,S11_vf_104044,S13_vs_151510                                                                                                                                                                                                                                                                                                                                                                                                                                                                                                                                                                                                                                                                                                                                                                                                                                                                                                                                                                                                                                                                                                                                                                                                                                                                                                                                                                                                                                                 |
| VC_1054_1 | MH675552,MT074136,MT074138,MT774378,MT774388,MT774391,S3_vf_127447,S5_vf_55415                                                                                                                                                                                                                                                                                                                                                                                                                                                                                                                                                                                                                                                                                                                                                                                                                                                                                                                                                                                                                                                                                                                                                                                                                                                                                                                                                                                                                         |
| VC_1054_2 | KJ003983,MT774389                                                                                                                                                                                                                                                                                                                                                                                                                                                                                                                                                                                                                                                                                                                                                                                                                                                                                                                                                                                                                                                                                                                                                                                                                                                                                                                                                                                                                                                                                      |
| VC_1054_3 | MT774385                                                                                                                                                                                                                                                                                                                                                                                                                                                                                                                                                                                                                                                                                                                                                                                                                                                                                                                                                                                                                                                                                                                                                                                                                                                                                                                                                                                                                                                                                               |
| VC_1299_0 | MG883709,MC945260,MC945282,MC945390,MC945396,MC945452,MC945485,MC945511,MC945515,MC945618,MC945634,MC945641,MC945647,MC945743,MH572525,MH572526,MK496694,MK496775,MK765561,MK765563,MK765564,MK765568,MK765569,MK765594,MK765638,MN311493,MT135347,MT135352,MT135355,MT135366,MT135381,MT135382,MT135387,MT135444,MW202703,MW202824,MZ089786,MZ089791,MZ089795,MZ089806,OL617028,OM869549,OM869559,OM869560,OM869562,OM869569,OM869650,OP549868,OP549871,OP549874,S3_vf_54498,S3_vf_67828,S9_vf_23901                                                                                                                                                                                                                                                                                                                                                                                                                                                                                                                                                                                                                                                                                                                                                                                                                                                                                                                                                                                                  |
| VC_638_0  | MH884512,S5_vf_145585                                                                                                                                                                                                                                                                                                                                                                                                                                                                                                                                                                                                                                                                                                                                                                                                                                                                                                                                                                                                                                                                                                                                                                                                                                                                                                                                                                                                                                                                                  |
| VC_1044_0 | MT635598,MT806185,MT806186,S4_vf_18803,S8_vf_183045                                                                                                                                                                                                                                                                                                                                                                                                                                                                                                                                                                                                                                                                                                                                                                                                                                                                                                                                                                                                                                                                                                                                                                                                                                                                                                                                                                                                                                                    |
| VC_1526_0 | MW660583,S12_vs_151292,S16_vs_127669                                                                                                                                                                                                                                                                                                                                                                                                                                                                                                                                                                                                                                                                                                                                                                                                                                                                                                                                                                                                                                                                                                                                                                                                                                                                                                                                                                                                                                                                   |
| VC_693_0  | MT774393,S10_vf_36880,S16_vf_151450,S4_vf_26417                                                                                                                                                                                                                                                                                                                                                                                                                                                                                                                                                                                                                                                                                                                                                                                                                                                                                                                                                                                                                                                                                                                                                                                                                                                                                                                                                                                                                                                        |
| VC_751_0  | CP084202,S16_vs_173096                                                                                                                                                                                                                                                                                                                                                                                                                                                                                                                                                                                                                                                                                                                                                                                                                                                                                                                                                                                                                                                                                                                                                                                                                                                                                                                                                                                                                                                                                 |
| VC_876_0  | GQ141189,S4_vs_VIRSorter_16493-cat_2                                                                                                                                                                                                                                                                                                                                                                                                                                                                                                                                                                                                                                                                                                                                                                                                                                                                                                                                                                                                                                                                                                                                                                                                                                                                                                                                                                                                                                                                   |
| VC_995_0  | JN712910,S4_vf_22219                                                                                                                                                                                                                                                                                                                                                                                                                                                                                                                                                                                                                                                                                                                                                                                                                                                                                                                                                                                                                                                                                                                                                                                                                                                                                                                                                                                                                                                                                   |



Table S7-9. VCs\_shared\_vOTUs\_only

| VC        | Members                                                                                                                                                                                                                                                                                                        |
|-----------|----------------------------------------------------------------------------------------------------------------------------------------------------------------------------------------------------------------------------------------------------------------------------------------------------------------|
| VC_1040_0 | S12_vf_181024,S17_vf_174033                                                                                                                                                                                                                                                                                    |
| VC_1040_1 | S8_vf_161703                                                                                                                                                                                                                                                                                                   |
| VC_1055_0 | S13_vs_15645,S7_vf_28429                                                                                                                                                                                                                                                                                       |
| VC_1055_1 | S14_vs_15228,S3_vs_82895,S8_vs_182288                                                                                                                                                                                                                                                                          |
| VC_1055_2 | S10_vs_37379                                                                                                                                                                                                                                                                                                   |
| VC_1056_0 | S3_vs_80151,S4_vs_VIRSorter_13190-cat_2                                                                                                                                                                                                                                                                        |
| VC_1063_0 | S16_vs_136935,S3_vs_64424                                                                                                                                                                                                                                                                                      |
| VC_1079_0 | S15_vf_75924                                                                                                                                                                                                                                                                                                   |
| VC_1079_1 | S5_vf_67622                                                                                                                                                                                                                                                                                                    |
| VC_1079_2 | S5_vf_145579                                                                                                                                                                                                                                                                                                   |
| VC_1085_0 | S12_vs_92868,S4_vs_VIRSorter_30222-cat_2                                                                                                                                                                                                                                                                       |
| VC_1085_1 | S10_vs_26365,S11_vf_13033,S11_vs_104064,S11_vs_68151,S12_vs_163990,S12_vs_188821,S12_vs_58560,S16_vf_5270,S2_vf_21511,S3_vf_35073,S4_vs_VIRSorter_3006-cat_1,S4_vs_VIRSorter_4839-cat_2,S5_vs_85065,S7_vf_38697,S7_vs_41098,S8_vf_163760,S8_vf_41376,S9_vs_32588,S9_vs_4558                                    |
| VC_1085_2 | S8_vf_23955                                                                                                                                                                                                                                                                                                    |
| VC_1149_0 | S14_vs_66841,S4_vs_VIRSorter_19324-cat_2,S7_vs_49426                                                                                                                                                                                                                                                           |
| VC_1195_0 | S4_vf_12624,S7_vf_5843                                                                                                                                                                                                                                                                                         |
| VC_1231_0 | S3_vs_73361,S8_vs_176604                                                                                                                                                                                                                                                                                       |
| VC_1254_0 | S3_vf_67333,S8_vf_132697                                                                                                                                                                                                                                                                                       |
| VC_1254_1 | S16_vf_1037,S4_vf_31978                                                                                                                                                                                                                                                                                        |
| VC_1254_2 | S15_vf_2513,S8_vf_131009                                                                                                                                                                                                                                                                                       |
| VC_1254_3 | S3_vf_108959                                                                                                                                                                                                                                                                                                   |
| VC_1254_4 | S3_vs_16825                                                                                                                                                                                                                                                                                                    |
| VC_1258_0 | S11_vs_37666,S13_vf_28309,S14_vf_114491,S14_vf_99344,S16_vf_100235,S17_vf_148303,S17_vf_174203,S17_vf_79151,S3_vf_57422,S3_vf_83536,S3_vf_84832,S4_vf_13627,S4_vf_5021,S5_vf_123990,S7_vf_19866,S7_vf_32559,S7_vf_36627,S7_vf_69348,S8_vf_196670,S8_vf_52050,S8_vs_142097,S8_vs_162053,S9_vf_70236,S9_vf_75363 |
| VC_1261_0 | S12_vf_176437,S12_vs_183752,S13_vf_131208,S16_vf_119834,S16_vf_169895,S17_vf_67042,S2_vf_4910,S3_vf_111776,S5_vs_142450,S6_vf_45228,S7_vf_76382,S7_vs_119492,S8_vf_174559,S9_vf_34736                                                                                                                          |
| VC_1265_0 | S4_vs_VIRSorter_4746-cat_2,S7_vs_41534                                                                                                                                                                                                                                                                         |
| VC_1274_0 | S12_vf_173208,S12_vs_188833,S3_vf_82571,S3_vs_114271,S5_vs_56083,S8_vs_125717                                                                                                                                                                                                                                  |
| VC_1289_0 | S11_vf_47632,S11_vs_30739,S14_vf_92240,S14_vs_117161,S3_vs_12985,S6_vs_10314,S6_vs_54606,S6_vs_56498,S7_vs_5236                                                                                                                                                                                                |
| VC_1290_0 | S12_vf_55175,S16_vs_75108,S17_vs_127519,S8_vs_145173                                                                                                                                                                                                                                                           |
| VC_1291_0 | S10_vs_18901,S13_vs_33947,S14_vs_9676,S17_vs_103009,S3_vs_18858,S3_vs_49835,S3_vs_95574,S5_vs_136679,S5_vs_145026,S5_vs_74199,S7_vs_20200,S7_vs_42563,S8_vf_72773,S8_vs_204260,S8_vs_205257,S8_vs_208113,S9_vs_4343,S9_vs_90849                                                                                |
| VC_1294_0 | S14_vs_3251,S8_vf_166403                                                                                                                                                                                                                                                                                       |
| VC_1295_0 | S12_vs_123620                                                                                                                                                                                                                                                                                                  |
| VC_1295_1 | S13_vs_26756                                                                                                                                                                                                                                                                                                   |
| VC_1421_0 | S14_vf_109545,S15_vs_7103,S6_vf_45618,S8_vf_111790                                                                                                                                                                                                                                                             |
| VC_1421_1 | S9_vs_10424                                                                                                                                                                                                                                                                                                    |
| VC_1479_0 | S14_vs_117165,S7_vs_87439,S8_vs_71212,S9_vs_90857                                                                                                                                                                                                                                                              |
| VC_1481_0 | S4_vs_VIRSorter_31196-circular-cat_2,S6_vs_15813,S7_vs_118295                                                                                                                                                                                                                                                  |
| VC_1481_1 | S4_vs_VIRSorter_31560-circular-cat_2,S8_vf_55476                                                                                                                                                                                                                                                               |
| VC_1481_2 | S7_vs_78507                                                                                                                                                                                                                                                                                                    |
| VC_1505_0 | S14_vs_32499,S17_vs_116640,S5_vf_8965,S6_vs_9784,S7_vs_557,S7_vs_944,S9_vs_28197                                                                                                                                                                                                                               |
| VC_151_0  | S11_vs_41107,S11_vs_58702,S12_vs_150812,S12_vs_6836,S12_vs_79785,S14_vf_56130,S14_vs_632,S16_vf_36146,S3_vf_100440,S3_vf_127409,S3_vf_80287,S4_vs_VIRSorter_1135-cat_2,S5_vs_145598,S7_vs_59465,S8_vf_208126,S9_vs_7881,S9_vs_90851                                                                            |
| VC_151_1  | S5_vs_77593                                                                                                                                                                                                                                                                                                    |
| VC_1511_0 | S14_vf_44452,S5_vf_6032,S8_vf_71214                                                                                                                                                                                                                                                                            |
| VC_152_0  | S11_vs_26767,S13_vs_148294,S14_vs_117158,S3_vs_108076,S4_vs_VIRSorter_15837-cat_2,S5_vs_145601,S7_vs_48523,S7_vs_83100,S7_vs_90915,S8_vs_208118                                                                                                                                                                |
| VC_1525_0 | S10_vs_62776                                                                                                                                                                                                                                                                                                   |
| VC_1525_1 | S7_vf_37279                                                                                                                                                                                                                                                                                                    |
| VC_1525_2 | S10_vf_43964                                                                                                                                                                                                                                                                                                   |
| VC_153_0  | S13_vs_67429,S8_vf_12212                                                                                                                                                                                                                                                                                       |
| VC_1549_0 | S13_vs_12957,S5_vf_137260,S7_vf_20129,S8_vf_136235,S8_vf_142700                                                                                                                                                                                                                                                |
| VC_1552_0 | S11_vf_84303,S11_vf_95067,S12_vf_128794,S12_vf_79666,S13_vf_109235,S1_vf_22149,S5_vf_110171,S5_vf_136076,S7_vf_76463                                                                                                                                                                                           |
| VC_1554_0 | S1_vs_143929,S5_vs_145592,S5_vs_67958,S7_vf_29196,S8_vs_4883                                                                                                                                                                                                                                                   |
| VC_1554_1 | S16_vf_108554                                                                                                                                                                                                                                                                                                  |
| VC_1554_2 | S7_vs_103530                                                                                                                                                                                                                                                                                                   |
| VC_1554_3 | S9_vs_50439                                                                                                                                                                                                                                                                                                    |
| VC_1554_4 | S9_vf_57277                                                                                                                                                                                                                                                                                                    |
| VC_1554_5 | S8_vf_54514                                                                                                                                                                                                                                                                                                    |
| VC_1558_0 | S10_vf_25241,S11_vf_28645,S3_vf_109277                                                                                                                                                                                                                                                                         |
| VC_1559_0 | S11_vf_68693,S11_vs_23188                                                                                                                                                                                                                                                                                      |
| VC_1559_1 | S15_vs_27510,S16_vs_127905                                                                                                                                                                                                                                                                                     |
| VC_1559_2 | S15_vs_42043                                                                                                                                                                                                                                                                                                   |
| VC_1564_0 | S10_vf_64371,S11_vf_27845,S14_vf_117157,S7_vf_138069,S8_vf_134943                                                                                                                                                                                                                                              |
| VC_1567_0 | S10_vs_120541,S11_vs_104054,S7_vs_27530,S8_vs_50431                                                                                                                                                                                                                                                            |
| VC_1568_0 | S12_vs_188828,S7_vs_134391                                                                                                                                                                                                                                                                                     |
| VC_1570_0 | S11_vs_14882,S11_vs_79275,S3_vs_72118,S5_vs_121419,S7_vs_136164,S7_vs_138096,S8_vf_93976                                                                                                                                                                                                                       |
| VC_1576_0 | S10_vs_71900,S12_vf_174374,S3_vf_18080,S7_vf_117697,S8_vs_9114                                                                                                                                                                                                                                                 |
| VC_1578_0 | S10_vs_36407,S7_vs_129271                                                                                                                                                                                                                                                                                      |
| VC_1582_0 | S12_vs_121913,S5_vs_1338                                                                                                                                                                                                                                                                                       |
| VC_1582_1 | S3_vs_39774                                                                                                                                                                                                                                                                                                    |
| VC_1582_2 | S14_vs_74067                                                                                                                                                                                                                                                                                                   |
| VC_1582_3 | S9_vf_13507                                                                                                                                                                                                                                                                                                    |
| VC_1583_0 | S12_vs_138261,S17_vs_43307,S8_vf_16172                                                                                                                                                                                                                                                                         |
| VC_1585_0 | S11_vf_92391,S17_vf_77057,S2_vf_20910                                                                                                                                                                                                                                                                          |
| VC_1586_0 | S16_vf_173099                                                                                                                                                                                                                                                                                                  |
| VC_1586_1 | S3_vs_81793                                                                                                                                                                                                                                                                                                    |



|           |                                                                                                                                                                                                                                                                            |
|-----------|----------------------------------------------------------------------------------------------------------------------------------------------------------------------------------------------------------------------------------------------------------------------------|
| VC_1590_0 | S6_vs_32886,S7_vf_134023                                                                                                                                                                                                                                                   |
| VC_1597_0 | S12_vf_10887,S12_vf_188822,S14_vf_48775                                                                                                                                                                                                                                    |
| VC_1598_0 | S12_vf_188830,S13_vf_7670                                                                                                                                                                                                                                                  |
| VC_1602_0 | S15_vs_18274,S16_vs_51901,S17_vs_177196,S7_vs_50194                                                                                                                                                                                                                        |
| VC_1603_0 | S12_vs_183891,S9_vs_90863                                                                                                                                                                                                                                                  |
| VC_1604_0 | S4_vs_VIRSorter_15112-cat_2,S9_vs_63485                                                                                                                                                                                                                                    |
| VC_1605_0 | S12_vs_26336,S5_vs_142195                                                                                                                                                                                                                                                  |
| VC_1606_0 | S12_vs_71525,S3_vs_117894                                                                                                                                                                                                                                                  |
| VC_1607_0 | S13_vs_87108,S16_vf_164913,S17_vf_172132,S17_vs_58025,S1_vf_125650,S2_vf_3356,S3_vf_127168,S6_vf_6314,S7_vf_27437,S8_vf_43483,S9_vs_75290                                                                                                                                  |
| VC_1611_0 | S16_vs_64584,S3_vs_12973,S4_vs_VIRSorter_13488-cat_2,S8_vs_5211                                                                                                                                                                                                            |
| VC_1612_0 | S14_vs_25852,S6_vs_46039                                                                                                                                                                                                                                                   |
| VC_1612_1 | S14_vs_11510,S8_vs_179208                                                                                                                                                                                                                                                  |
| VC_1612_2 | S14_vs_70985                                                                                                                                                                                                                                                               |
| VC_1612_3 | S5_vs_109527                                                                                                                                                                                                                                                               |
| VC_1616_0 | S16_vs_48714,S7_vf_71527                                                                                                                                                                                                                                                   |
| VC_1617_0 | S17_vf_177197,S4_vf_10506                                                                                                                                                                                                                                                  |
| VC_1618_0 | S3_vf_127423,S8_vs_132359                                                                                                                                                                                                                                                  |
| VC_219_0  | S10_vf_80712,S11_vf_28515                                                                                                                                                                                                                                                  |
| VC_219_1  | S5_vs_97574                                                                                                                                                                                                                                                                |
| VC_219_2  | S7_vs_137611                                                                                                                                                                                                                                                               |
| VC_219_3  | S8_vs_59736                                                                                                                                                                                                                                                                |
| VC_221_0  | S12_vf_67909                                                                                                                                                                                                                                                               |
| VC_221_1  | S9_vf_90847                                                                                                                                                                                                                                                                |
| VC_278_0  | S5_vs_145590,S5_vs_145599,S5_vs_145602,S5_vs_2876,S5_vs_80498,S6_vs_56491,S7_vf_60968,S7_vs_13799,S7_vs_138109,S7_vs_48832,S9_vs_34898                                                                                                                                     |
| VC_278_1  | S9_vs_90859                                                                                                                                                                                                                                                                |
| VC_383_0  | S12_vs_93357,S14_vs_2870,S16_vs_120622                                                                                                                                                                                                                                     |
| VC_439_0  | S12_vf_48278,S13_vs_98591,S8_vs_208114                                                                                                                                                                                                                                     |
| VC_442_0  | S16_vs_116956,S16_vs_173079,S7_vs_48708                                                                                                                                                                                                                                    |
| VC_490_0  | S11_vf_3790                                                                                                                                                                                                                                                                |
| VC_490_1  | S8_vf_173225                                                                                                                                                                                                                                                               |
| VC_490_2  | S4_vf_31973                                                                                                                                                                                                                                                                |
| VC_490_3  | S12_vf_188819                                                                                                                                                                                                                                                              |
| VC_491_0  | S12_vf_169796,S8_vf_208110                                                                                                                                                                                                                                                 |
| VC_491_1  | S13_vf_4901                                                                                                                                                                                                                                                                |
| VC_491_2  | S8_vf_11794                                                                                                                                                                                                                                                                |
| VC_491_3  | S10_vf_120738                                                                                                                                                                                                                                                              |
| VC_630_0  | S15_vs_71968,S16_vs_142561,S3_vs_17168,S5_vs_20500                                                                                                                                                                                                                         |
| VC_641_0  | S3_vs_127391,S4_vs_VIRSorter_31976-circular-cat_2                                                                                                                                                                                                                          |
| VC_658_0  | S10_vs_2538,S14_vs_117160,S5_vs_145581                                                                                                                                                                                                                                     |
| VC_669_0  | S11_vs_104041,S8_vs_182331                                                                                                                                                                                                                                                 |
| VC_724_0  | S5_vs_107105,S5_vs_145597,S8_vs_76852,S9_vs_5676,S9_vs_84046,S9_vs_90860                                                                                                                                                                                                   |
| VC_748_0  | S7_vf_84974,S8_vf_187742                                                                                                                                                                                                                                                   |
| VC_750_0  | S11_vf_104048,S6_vf_25710                                                                                                                                                                                                                                                  |
| VC_752_0  | S12_vs_86928,S5_vs_86562                                                                                                                                                                                                                                                   |
| VC_778_0  | S11_vs_11267,S12_vs_99092,S14_vs_62178,S16_vs_26078,S17_vs_121041,S1_vs_62409,S5_vf_11450,S5_vs_49480,S6_vs_56490,S7_vs_55409,S8_vs_143608,S9_vs_73764,S9_vs_75050                                                                                                         |
| VC_779_0  | S11_vs_34137,S12_vs_106329,S13_vf_22175,S14_vs_117166,S14_vs_61530,S16_vs_103726,S16_vs_92150,S17_vs_41845,S17_vs_73830,S3_vs_28402,S4_vs_VIRSorter_12831-circular-cat_2,S5_vs_58859,S7_vs_122151,S7_vs_38113,S7_vs_38834,S7_vs_82140,S8_vs_154231,S9_vf_79919,S9_vs_46498 |
| VC_847_0  | S13_vs_68102,S8_vf_203044                                                                                                                                                                                                                                                  |
| VC_86_0   | S13_vf_151755,S8_vf_106946                                                                                                                                                                                                                                                 |
| VC_878_0  | S16_vs_78361,S3_vs_123834                                                                                                                                                                                                                                                  |
| VC_921_0  | S2_vf_21630,S5_vf_145588,S7_vf_68546,S8_vs_136922                                                                                                                                                                                                                          |
| VC_923_0  | S14_vs_14737,S14_vs_39797,S4_vs_VIRSorter_31171-circular-cat_2,S4_vs_VIRSorter_31977-circular-cat_2,S5_vf_6506,S5_vs_58766,S7_vs_28733                                                                                                                                     |
| VC_923_1  | S3_vf_61860                                                                                                                                                                                                                                                                |
| VC_923_2  | S6_vs_29152                                                                                                                                                                                                                                                                |
| VC_946_0  | S11_vs_104053,S14_vf_117164,S15_vf_55639,S15_vs_1407,S4_vf_2524,S5_vs_145605,S7_vf_135778                                                                                                                                                                                  |
| VC_948_0  | S17_vs_160502,S17_vs_39515,S3_vf_73597                                                                                                                                                                                                                                     |
| VC_948_1  | S4_vs_VIRSorter_31975-circular-cat_1                                                                                                                                                                                                                                       |
| VC_949_0  | S17_vf_35138,S4_vf_12614                                                                                                                                                                                                                                                   |
| VC_950_0  | S10_vs_67471,S12_vf_60224,S12_vf_69136,S14_vs_66208,S7_vs_138173                                                                                                                                                                                                           |
| VC_951_0  | S11_vs_1937,S8_vs_9987                                                                                                                                                                                                                                                     |
| VC_951_1  | S5_vf_18461,S8_vf_208120                                                                                                                                                                                                                                                   |
| VC_951_2  | S11_vf_70015                                                                                                                                                                                                                                                               |
| VC_963_0  | S16_vf_87190,S6_vf_56486,S7_vs_137915,S8_vs_208103                                                                                                                                                                                                                         |
| VC_963_1  | S11_vf_104033                                                                                                                                                                                                                                                              |
| VC_1256_0 | S11_vf_66160,S11_vs_62573,S1_vf_158961                                                                                                                                                                                                                                     |
| VC_1300_0 | S13_vs_90967,S1_vs_100019                                                                                                                                                                                                                                                  |
| VC_1489_0 | S1_vf_159951,S3_vf_127399                                                                                                                                                                                                                                                  |
| VC_150_0  | S11_vf_104070,S11_vf_34224,S9_vf_90871                                                                                                                                                                                                                                     |
| VC_1565_0 | S13_vs_83447,S9_vs_48424                                                                                                                                                                                                                                                   |
| VC_1565_1 | S7_vs_54322                                                                                                                                                                                                                                                                |
| VC_1572_0 | S3_vs_70508,S5_vs_129970,S7_vs_2599                                                                                                                                                                                                                                        |
| VC_1595_0 | S11_vs_6458,S5_vs_9747                                                                                                                                                                                                                                                     |
| VC_1596_0 | S11_vs_84627,S13_vs_9438                                                                                                                                                                                                                                                   |
| VC_1614_0 | S14_vs_67094,S5_vs_124035,S5_vs_7444                                                                                                                                                                                                                                       |
| VC_1620_0 | S3_vs_90341,S7_vs_129858                                                                                                                                                                                                                                                   |
| VC_332_0  | S5_vs_84946,S7_vs_86377,S9_vs_1966                                                                                                                                                                                                                                         |
| VC_558_0  | S11_vs_76784,S7_vs_111831                                                                                                                                                                                                                                                  |



|           |                                                                 |
|-----------|-----------------------------------------------------------------|
| VC_694_0  | SI4_vs_78164,S5_vs_93839                                        |
| VC_696_0  | S5_vs_69083,S5_vs_79992,S7_vs_119679                            |
| VC_732_0  | SI1_vs_11994,S5_vs_122568,S5_vs_130958                          |
| VC_782_0  | SI4_vs_102698,SI4_vs_110290,SI_vs_91270,S5_vs_3183,S9_vs_26179  |
| VC_905_0  | SI3_vs_121307,SI_vs_50591,S3_vs_100785,S5_vs_116235             |
| VC_1062_0 | SI0_vs_14557,S8_vs_28311                                        |
| VC_1507_0 | S8_vs_148389,S8_vs_4153                                         |
| VC_1527_0 | SI0_vs_35854,SI5_vs_2032                                        |
| VC_1557_0 | SI6_vs_96483                                                    |
| VC_1561_0 | S4_vs_4891,S8_vs_79769                                          |
| VC_1579_0 | SI0_vs_36598,SI6_vs_80244                                       |
| VC_1591_0 | SI6_vs_19968,SI6_vs_33281                                       |
| VC_1599_0 | SI5_vs_35445,SI6_vs_32764                                       |
| VC_1601_0 | SI2_vs_137069,S6_vs_56493                                       |
| VC_1619_0 | S8_vs_208102,S8_vs_208107                                       |
| VC_670_0  | SI6_vs_89511,S4_vs_VIRSorter_4959-cat_2,S6_vs_12945,S6_vs_39025 |
| VC_780_0  | SI6_vs_34751                                                    |
| VC_922_0  | SI0_vs_77004                                                    |



Table S7-10. VCs statistics

|                                                                     |      |
|---------------------------------------------------------------------|------|
| After curation:                                                     |      |
| VLP-VCs:                                                            |      |
| Total VCs                                                           | 1621 |
| VCs with "clustered" or "clustered/singleton" vOTUs and Ref genomes | 1354 |
| VCs having reference genomes only                                   | 1160 |
| VCs having no reference genomes at all                              | 140  |
| VCs uniquely having ME-vOTUs with Ref. genomes                      | 18   |
| VCs uniquely having ME-vOTUs only (w/o Ref. genomes)                | 19   |
| VCs uniquely having SHHC-vOTUs with Ref. genomes                    | 5    |
| VCs uniquely having SHHC-vOTUs only (w/o Ref. genomes)              | 5    |
| VCs having shared vOTUs in both samples (with Ref. genomes)         | 31   |
| VCs having shared vOTUs in both samples (w/o Ref. genomes)          | 116  |

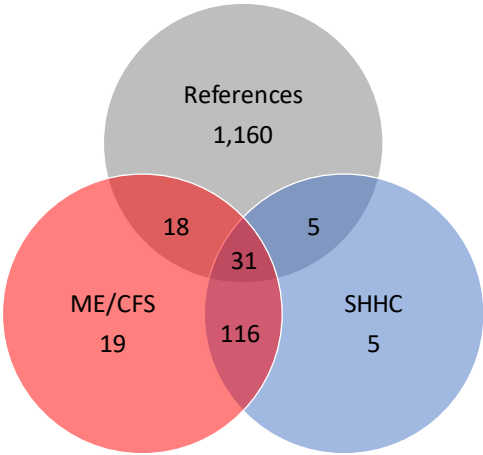

|                                                                     |      |
|---------------------------------------------------------------------|------|
| Before curation:                                                    |      |
| VLP-VCs:                                                            |      |
| Total VCs                                                           | 1621 |
| VCs with "clustered" or "clustered/singleton" vOTUs and Ref genomes | 1354 |
| VCs having reference genomes only                                   | 1160 |
| VCs having no reference genomes at all                              | 140  |
| VCs containing ME-vOTUs with Ref. genomes                           | 21   |
| VCs only having ME-vOTUs (w/o Ref. genomes)                         | 36   |
| VCs containing SHHC-vOTUs with Ref. genomes                         | 11   |
| VCs only having SHHC-vOTUs (w/o Ref. genomes)                       | 18   |
| VCs having both ME and SHHC-vOTUs with Ref. genomes                 | 22   |
| VCs having both ME and SHHC-vOTUs (w/o Ref. genomes)                | 86   |

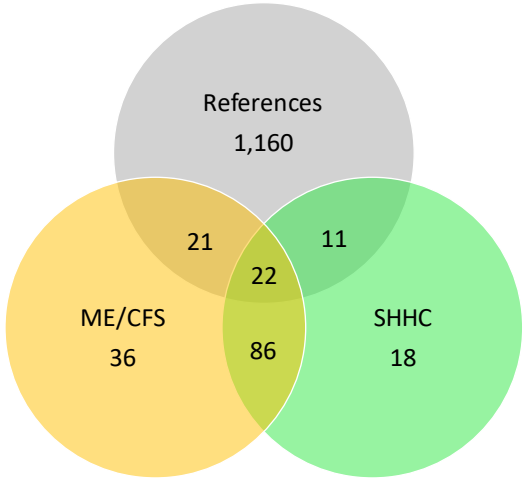
