# Supplementary material for: Investigating the Human Intestinal DNA Virome and Predicting Disease-Associated Virus–Host Interactions in Severe Myalgic Encephalomyelitis/Chronic Fatigue Syndrome (ME/CFS)
Source: MDPI journal article supplement (doi:10.3390/ijms242417267), 2023-12-08
Supplement: s1 [file s1]

Table S5. NC contamination  
Table S5-1. NCs\_sequences\_stats

| Sample_IDs | # Raw_reads (PE) | # cleaned_reads (PE) | #Total_raw_contigs | N50 (bp) | Longest_contig_length (bp) |
|------------|------------------|----------------------|--------------------|----------|----------------------------|
| NC1        | 306630           | 360240               | 3597               | 433      | 13109                      |
| NC2        | 16623            | 18592                | 19                 | 446      | 910                        |
| NC3        | 72714            | 111664               | 2128               | 495      | 8397                       |
| Sum        | 395967           | 490496               | 5744               | 1374     | 22416                      |
| Mean       | 131989.00        | 163498.67            | 1914.67            | 458.00   | 7472.00                    |
| SD         | 153821.84        | 176623.79            | 1798.51            | 32.70    | 6151.88                    |

|                              | NC1-3        |                                 |                                      |                                 | Notes                                                 |
|------------------------------|--------------|---------------------------------|--------------------------------------|---------------------------------|-------------------------------------------------------|
|                              | Merged_UViGs | LQ_undetermined_NC-UViGs_checkv | nr-vOTUs_size_filtration_1kb_cut_off | LQ_undetermined_nr-vOTUs_checkv |                                                       |
| #Viral genomes               | 5953         | 5953                            | 103                                  | 103                             | All NC viral genomes are low quality and undetermined |
| #Viral genomes >= 1 kb       | 255          | 255                             | 103                                  | 103                             |                                                       |
| #Viral genomes >= 5 kb       | 13           | 13                              | 3                                    | 3                               |                                                       |
| #Viral genomes >= 10 kb      | 4            | 4                               | 0                                    | 0                               |                                                       |
| N50 (bp)                     | 468          | 468                             | NA                                   | NA                              |                                                       |
| Longest representative (bp)  | 13109        | 13109                           | 8080                                 | 8080                            | Not-determined                                        |
| Shortest representative (bp) | 239          | 239                             | 1040                                 | 1040                            | Not-determined                                        |

Table S5-2. NC1\_taxa

|       |        |       |    |         |                                          |
|-------|--------|-------|----|---------|------------------------------------------|
| 25.04 | 45105  | 45105 | U  | 0       | unclassified                             |
| 74.96 | 135015 | 859   | R  | 1       | root                                     |
| 74    | 133297 | 185   | R1 | 131567  | cellular organisms                       |
| 72.32 | 130261 | 475   | D  | 2       | Bacteria                                 |
| 58.69 | 105718 | 1452  | P  | 1224    | Proteobacteria                           |
| 27.47 | 49478  | 53    | C  | 28216   | Betaproteobacteria                       |
| 27.4  | 49360  | 1152  | O  | 80840   | Burkholderiales                          |
| 25.49 | 45914  | 1107  | F  | 80864   | Comamonadaceae                           |
| 24.53 | 44185  | 28928 | G  | 80865   | Delftia                                  |
| 6.82  | 12277  | 12277 | S  | 558537  | Delftia lacustris                        |
| 1.01  | 1814   | 1814  | S  | 180282  | Delftia tsuruhatensis                    |
| 0.47  | 855    | 854   | S  | 80866   | Delftia acidovorans                      |
| 0     | 1      | 1     | S1 | 398578  | Delftia acidovorans SPH-1                |
| 0.17  | 311    | 67    | G1 | 2613839 | unclassified Delftia                     |
| 0.08  | 148    | 148   | S  | 742013  | Delftia sp. Cs1-4                        |
| 0.05  | 96     | 96    | S  | 1920191 | Delftia sp. HK171                        |
| 0.07  | 134    | 9     | G  | 12916   | Acidovorax                               |
| 0.06  | 108    | 0     | G1 | 2684926 | unclassified Acidovorax                  |
| 0.05  | 82     | 82    | S  | 358220  | Acidovorax sp. KKS102                    |
| 0.01  | 11     | 11    | S  | 232721  | Acidovorax sp. JS42                      |
| 0     | 7      | 7     | S  | 2478662 | Acidovorax sp. 1608163                   |
| 0     | 4      | 4     | S  | 1842533 | Acidovorax sp. RAC01                     |
| 0     | 4      | 4     | S  | 2518343 | Acidovorax sp. JMULE5                    |
| 0.01  | 14     | 14    | S  | 553814  | Acidovorax carolinensis                  |
| 0     | 3      | 3     | S  | 2743470 | Acidovorax antarcticus                   |
| 0.07  | 133    | 0     | G  | 201096  | Alicyclophilus                           |
| 0.07  | 133    | 0     | S  | 179636  | Alicyclophilus denitrificans             |
| 0.07  | 133    | 133   | S1 | 596154  | Alicyclophilus denitrificans K601        |
| 0.07  | 125    | 22    | G  | 34072   | Variovorax                               |
| 0.05  | 95     | 10    | G1 | 663243  | unclassified Variovorax                  |
| 0.03  | 63     | 63    | S  | 1034889 | Variovorax sp. HW608                     |
| 0.01  | 14     | 14    | S  | 207745  | Variovorax sp. WDL1                      |
| 0     | 5      | 5     | S  | 662548  | Variovorax sp. RA8                       |
| 0     | 3      | 3     | S  | 2762322 | Variovorax sp. PAMC26660                 |
| 0     | 5      | 5     | S  | 34073   | Variovorax paradoxus                     |
| 0     | 3      | 3     | S  | 436515  | Variovorax boronicumulans                |
| 0.06  | 105    | 14    | G  | 283     | Comamonas                                |
| 0.01  | 22     | 22    | S  | 160825  | Comamonas koreensis                      |
| 0.01  | 21     | 10    | S  | 285     | Comamonas testosteroni                   |
| 0.01  | 11     | 11    | S1 | 1392005 | Comamonas testosteroni TK102             |
| 0.01  | 20     | 20    | S  | 1562974 | Comamonas piscis                         |
| 0.01  | 18     | 18    | S  | 225991  | Comamonas aquatica                       |
| 0     | 9      | 0     | G1 | 2638500 | unclassified Comamonas                   |
| 0     | 9      | 9     | S  | 1232667 | Comamonas sp. 7D-2                       |
| 0     | 1      | 1     | S  | 1082851 | Comamonas serinivorans                   |
| 0.05  | 93     | 0     | G  | 238749  | Diaphorobacter                           |
| 0.04  | 80     | 1     | G1 | 2649760 | unclassified Diaphorobacter              |
| 0.03  | 46     | 46    | S  | 2714924 | Diaphorobacter sp. HDW4A                 |
| 0.01  | 26     | 26    | S  | 2792224 | Diaphorobacter sp. JS3051                |
| 0     | 6      | 6     | S  | 2735554 | Diaphorobacter sp. JS3050                |
| 0     | 1      | 1     | S  | 2714925 | Diaphorobacter sp. HDW4B                 |
| 0     | 8      | 8     | S  | 1288495 | Diaphorobacter aerolatus                 |
| 0     | 3      | 3     | S  | 1715720 | Diaphorobacter ruginosibacter            |
| 0     | 2      | 2     | S  | 1546149 | Diaphorobacter polyhydroxybutyrativorans |
| 0.01  | 13     | 1     | G  | 47420   | Hydrogenophaga                           |
| 0.01  | 12     | 3     | G1 | 2610897 | unclassified Hydrogenophaga              |
| 0     | 8      | 8     | S  | 795665  | Hydrogenophaga sp. PBC                   |
| 0     | 1      | 1     | S  | 434010  | Hydrogenophaga sp. PBL-H3                |
| 0     | 9      | 0     | G  | 28065   | Rhodoferrax                              |
| 0     | 5      | 0     | G1 | 2627954 | unclassified Rhodoferrax                 |
| 0     | 5      | 5     | S  | 2741720 | Rhodoferrax sp. BAB1                     |
| 0     | 4      | 4     | S  | 1484693 | Rhodoferrax saidenbachensis              |
| 0     | 6      | 0     | G  | 665874  | Limnhabitans                             |
| 0     | 6      | 0     | G1 | 2626134 | unclassified Limnhabitans                |
| 0     | 5      | 5     | S  | 1678129 | Limnhabitans sp. 103DPR2                 |
| 0     | 1      | 1     | S  | 1678128 | Limnhabitans sp. 63ED37-2                |
| 0     | 1      | 0     | G  | 215579  | Schlegella                               |
| 0     | 1      | 1     | S  | 215580  | Schlegella thermodepolymerans            |
| 0     | 1      | 0     | G  | 364316  | Verminephrobacter                        |
| 0     | 1      | 0     | S  | 364317  | Verminephrobacter eiseniae               |
| 0     | 1      | 1     | S1 | 391735  | Verminephrobacter eiseniae EF01-2        |
| 0     | 1      | 0     | G  | 683756  | Kinneretia                               |
| 0     | 1      | 0     | G1 | 2632542 | unclassified Kinneretia                  |
| 0     | 1      | 1     | S  | 2714952 | Kinneretia sp. DAIF2                     |
| 0     | 1      | 0     | G  | 1649468 | Melaminivora                             |
| 0     | 1      | 0     | G1 | 2641902 | unclassified Melaminivora                |
| 0     | 1      | 1     | S  | 2109913 | Melaminivora sp. SC2-9                   |
| 0.63  | 1138   | 200   | F  | 119060  | Burkholderiaceae                         |
| 0.38  | 691    | 327   | G  | 106589  | Cupriavidus                              |
| 0.03  | 57     | 57    | S  | 82633   | Cupriavidus pauculus                     |
| 0.03  | 54     | 54    | S  | 164546  | Cupriavidus taiwanensis                  |
| 0.03  | 52     | 48    | S  | 82541   | Cupriavidus gilardii                     |
| 0     | 4      | 4     | S1 | 1267562 | Cupriavidus gilardii CR3                 |
| 0.02  | 34     | 34    | S  | 1796606 | Cupriavidus nantongensis                 |
| 0.02  | 31     | 30    | S  | 106590  | Cupriavidus necator                      |
| 0     | 1      | 1     | S1 | 1042878 | Cupriavidus necator N-1                  |
| 0.02  | 29     | 29    | S  | 96344   | Cupriavidus oxalaticus                   |
| 0.01  | 26     | 26    | S  | 119219  | Cupriavidus metallidurans                |
| 0.01  | 25     | 25    | S  | 151783  | Cupriavidus campinensis                  |
| 0.01  | 20     | 20    | S  | 68895   | Cupriavidus basilensis                   |
| 0.01  | 13     | 13    | S  | 1040979 | Cupriavidus neocaledonicus               |
| 0.01  | 12     | 0     | G1 | 2640874 | unclassified Cupriavidus                 |
| 0     | 6      | 6     | S  | 876364  | Cupriavidus sp. USMAA2-4                 |
| 0     | 6      | 6     | S  | 2771360 | Cupriavidus sp. ISTL7                    |
| 0.01  | 11     | 0     | S  | 248026  | Cupriavidus pinatubonensis               |
| 0.01  | 11     | 11    | S1 | 264198  | Cupriavidus pinatubonensis JMP134        |
| 0.06  | 104    | 19    | G  | 48736   | Ralstonia                                |
| 0.03  | 47     | 41    | S  | 329     | Ralstonia pickettii                      |
| 0     | 5      | 5     | S1 | 428406  | Ralstonia pickettii 12D                  |
| 0     | 1      | 1     | S1 | 402626  | Ralstonia pickettii 12J                  |
| 0.01  | 19     | 19    | S  | 305     | Ralstonia solanacearum                   |
| 0.01  | 13     | 13    | S  | 105219  | Ralstonia mannitolilytica                |
| 0     | 6      | 6     | S  | 190721  | Ralstonia insidiosa                      |

|      |     |       |         |                                                          |
|------|-----|-------|---------|----------------------------------------------------------|
| 0.05 | 86  | 3 G   | 32008   | Burkholderia                                             |
| 0.03 | 59  | 4 G1  | 87882   | Burkholderia cepacia complex                             |
| 0.02 | 35  | 35 S  | 95485   | Burkholderia stabilis                                    |
| 0.01 | 14  | 14 S  | 95486   | Burkholderia cenocepacia                                 |
| 0    | 4   | 4 S   | 488731  | Burkholderia seminalis                                   |
| 0    | 1   | 0 S   | 292     | Burkholderia cepacia                                     |
| 0    | 1   | 1 S1  | 1395570 | Burkholderia cepacia JBK9                                |
| 0    | 1   | 1 S   | 488732  | Burkholderia diffusa                                     |
| 0.01 | 20  | 1 G1  | 2613784 | unclassified Burkholderia                                |
| 0    | 7   | 7 S   | 1097668 | Burkholderia sp. YI23                                    |
| 0    | 5   | 5 S   | 1855726 | Burkholderia sp. KK1                                     |
| 0    | 4   | 4 S   | 1705310 | Burkholderia sp. IDO3                                    |
| 0    | 2   | 2 S   | 1740163 | Burkholderia sp. Bp7605                                  |
| 0    | 1   | 1 S   | 758782  | Burkholderia sp. THE68                                   |
| 0    | 2   | 2 S   | 28095   | Burkholderia gladioli                                    |
| 0    | 1   | 1 S   | 337     | Burkholderia glumae                                      |
| 0    | 1   | 0 G1  | 111527  | pseudomallei group                                       |
| 0    | 1   | 1 S   | 28450   | Burkholderia pseudomallei                                |
| 0.02 | 40  | 7 G   | 1822464 | Paraburkholderia                                         |
| 0    | 9   | 0 G1  | 2615204 | unclassified Paraburkholderia                            |
| 0    | 7   | 7 S   | 1926494 | Paraburkholderia sp. SOS3                                |
| 0    | 2   | 2 S   | 2604047 | Paraburkholderia sp. Msb3                                |
| 0    | 8   | 8 S   | 311230  | Paraburkholderia terrae                                  |
| 0    | 5   | 5 S   | 92647   | Paraburkholderia tropica                                 |
| 0    | 4   | 4 S   | 311231  | Paraburkholderia ginsengisoli                            |
| 0    | 3   | 3 S   | 2654982 | Paraburkholderia atlantica                               |
| 0    | 2   | 0 S   | 36873   | Paraburkholderia xenovorans                              |
| 0    | 2   | 2 S1  | 266265  | Paraburkholderia xenovorans LB400                        |
| 0    | 2   | 0 S   | 261302  | Paraburkholderia phytofirmans                            |
| 0    | 2   | 2 S1  | 398527  | Paraburkholderia phytofirmans PsJN                       |
| 0.01 | 14  | 0 G   | 93217   | Pandoraea                                                |
| 0    | 6   | 6 S   | 93220   | Pandoraea pnomenusa                                      |
| 0    | 5   | 5 S   | 1891094 | Pandoraea fibrosis                                       |
| 0    | 1   | 1 S   | 445709  | Pandoraea thiooxydans                                    |
| 0    | 1   | 1 S   | 656179  | Pandoraea faecigallinarum                                |
| 0    | 1   | 0 G1  | 2624094 | unclassified Pandoraea                                   |
| 0    | 1   | 1 S   | 2518599 | Pandoraea sp. XY-2                                       |
| 0    | 2   | 0 G   | 1827195 | Caballeronia                                             |
| 0    | 2   | 0 G1  | 2646786 | unclassified Caballeronia                                |
| 0    | 2   | 2 S   | 2814653 | Caballeronia sp. M1242                                   |
| 0    | 1   | 0 G   | 2571159 | Mycetohabitans                                           |
| 0    | 1   | 0 S   | 412963  | Mycetohabitans rhizoxinica                               |
| 0    | 1   | 1 S1  | 882378  | Mycetohabitans rhizoxinica HKI 454                       |
| 0.55 | 982 | 114 F | 75682   | Oxalobacteraceae                                         |
| 0.38 | 680 | 115 G | 149698  | Massilia                                                 |
| 0.15 | 272 | 40 G1 | 2609279 | unclassified Massilia                                    |
| 0.06 | 110 | 110 S | 1707785 | Massilia sp. VG5                                         |
| 0.04 | 72  | 72 S  | 2769491 | Massilia sp. LPB0304                                     |
| 0.01 | 19  | 19 S  | 2765360 | Massilia sp. CCM 8941                                    |
| 0.01 | 15  | 15 S  | 1678028 | Massilia sp. NR 4-1                                      |
| 0    | 9   | 9 S   | 1593482 | Massilia sp. YMA4                                        |
| 0    | 7   | 7 S   | 2709302 | Massilia sp. Dwa41.01b                                   |
| 0.1  | 177 | 177 S | 945844  | Massilia oculi                                           |
| 0.02 | 42  | 42 S  | 1141883 | Massilia putida                                          |
| 0.01 | 21  | 21 S  | 864828  | Massilia umbonata                                        |
| 0.01 | 20  | 20 S  | 2072590 | Massilia armeniaca                                       |
| 0.01 | 19  | 19 S  | 871742  | Massilia flava                                           |
| 0.01 | 11  | 11 S  | 321984  | Massilia plicata                                         |
| 0    | 3   | 3 S   | 2045208 | Massilia violaceinigra                                   |
| 0.05 | 99  | 0 G   | 75654   | Duganella                                                |
| 0.05 | 99  | 1 G1  | 2636909 | unclassified Duganella                                   |
| 0.04 | 72  | 72 S  | 2728020 | Duganella sp. GN2-R2                                     |
| 0.01 | 26  | 26 S  | 2728021 | Duganella sp. AF9R3                                      |
| 0.03 | 46  | 34 G  | 29580   | Janthinobacterium                                        |
| 0    | 4   | 0 G1  | 2610881 | unclassified Janthinobacterium                           |
| 0    | 2   | 2 S   | 1644131 | Janthinobacterium sp. 1_2014MBL_MicDiv                   |
| 0    | 2   | 2 S   | 2497863 | Janthinobacterium sp. 17J80-10                           |
| 0    | 3   | 0 S   | 55508   | Janthinobacterium agaricidamnorum                        |
| 0    | 3   | 3 S1  | 1349767 | Janthinobacterium agaricidamnorum NBRC 102515 = DSM 9628 |
| 0    | 3   | 3 S   | 368607  | Janthinobacterium svalbardensis                          |
| 0    | 1   | 1 S   | 29581   | Janthinobacterium lividum                                |
| 0    | 1   | 1 S   | 2590869 | Janthinobacterium tractae                                |
| 0.01 | 16  | 0 G   | 963     | Herbaspirillum                                           |
| 0.01 | 11  | 11 S  | 863372  | Herbaspirillum huttiense                                 |
| 0    | 3   | 3 S   | 964     | Herbaspirillum seropedicae                               |
| 0    | 1   | 0 S   | 80842   | Herbaspirillum rubrisubalbicans                          |
| 0    | 1   | 1 S1  | 1235827 | Herbaspirillum rubrisubalbicans Os34                     |
| 0    | 1   | 0 S   | 341045  | Herbaspirillum hiltneri                                  |
| 0    | 1   | 1 S1  | 1262470 | Herbaspirillum hiltneri N3                               |
| 0.01 | 13  | 0 G   | 401469  | Undibacterium                                            |
| 0.01 | 13  | 5 G1  | 2630295 | unclassified Undibacterium                               |
| 0    | 6   | 6 S   | 2058625 | Undibacterium sp. YM2                                    |
| 0    | 2   | 2 S   | 2058624 | Undibacterium sp. KW1                                    |
| 0.01 | 11  | 0 G   | 1344552 | Noviherbaspirillum                                       |
| 0.01 | 11  | 0 G1  | 2617509 | unclassified Noviherbaspirillum                          |
| 0.01 | 11  | 11 S  | 2601898 | Noviherbaspirillum sp. UKPF54                            |
| 0    | 3   | 0 G   | 202907  | Collimonas                                               |
| 0    | 2   | 2 S   | 279058  | Collimonas arenae                                        |
| 0    | 1   | 1 S   | 158899  | Collimonas fungivorans                                   |
| 0.05 | 93  | 0 F   | 506     | Alcaligenaceae                                           |
| 0.02 | 39  | 0 G   | 507     | Alcaligenes                                              |
| 0.02 | 39  | 39 S  | 511     | Alcaligenes faecalis                                     |
| 0.01 | 20  | 10 G  | 222     | Achromobacter                                            |
| 0    | 7   | 6 S   | 85698   | Achromobacter xylosoxidans                               |
| 0    | 1   | 1 S1  | 762376  | Achromobacter xylosoxidans A8                            |
| 0    | 1   | 1 S   | 217203  | Achromobacter spanius                                    |
| 0    | 1   | 1 S   | 1353891 | Achromobacter deleyi                                     |
| 0    | 1   | 0 G1  | 2626865 | unclassified Achromobacter                               |
| 0    | 1   | 1 S   | 1758194 | Achromobacter sp. AONIH1                                 |
| 0.01 | 17  | 0 G   | 517     | Bordetella                                               |
| 0    | 8   | 8 S   | 103855  | Bordetella hinzii                                        |
| 0    | 5   | 5 S   | 94624   | Bordetella petrii                                        |
| 0    | 2   | 2 S   | 1331258 | Bordetella pseudohinzii                                  |
| 0    | 1   | 1 S   | 1416803 | Bordetella genomosp. 9                                   |

|       |       |         |         |                                       |
|-------|-------|---------|---------|---------------------------------------|
| 0     | 1     | 0 G1    | 2630031 | unclassified Bordetella               |
| 0     | 1     | 1 S     | 1746199 | Bordetella sp. N                      |
| 0.01  | 12    | 0 G     | 305976  | Pusillimonas                          |
| 0     | 7     | 7 S     | 2028345 | Pusillimonas thiosulfatoxidans        |
| 0     | 5     | 0 G1    | 2640016 | unclassified Pusillimonas             |
| 0     | 5     | 5 S     | 1007105 | Pusillimonas sp. T7-7                 |
| 0     | 5     | 0 G     | 152267  | Pigmentiphaga                         |
| 0     | 5     | 0 G1    | 2626614 | unclassified Pigmentiphaga            |
| 0     | 5     | 5 S     | 2488560 | Pigmentiphaga sp. H8                  |
| 0.03  | 51    | 0 F     | 995019  | Sutterellaceae                        |
| 0.03  | 48    | 0 G     | 40544   | Sutterella                            |
| 0.02  | 43    | 43 S    | 40545   | Sutterella wadsworthensis             |
| 0     | 5     | 5 S     | 2494234 | Sutterella megalosphaeroides          |
| 0     | 3     | 0 G     | 1918598 | Turicimonas                           |
| 0     | 3     | 3 S     | 1796652 | Turicimonas muris                     |
| 0.02  | 30    | 0 O1    | 224471  | Burkholderiales genera incertae sedis |
| 0.01  | 11    | 0 G     | 88      | Leptothrix                            |
| 0.01  | 11    | 0 S     | 34029   | Leptothrix cholodnii                  |
| 0.01  | 11    | 11 S1   | 395495  | Leptothrix cholodnii SP-6             |
| 0     | 6     | 3 G     | 316612  | Methylibium                           |
| 0     | 3     | 0 G1    | 2633235 | unclassified Methylibium              |
| 0     | 3     | 3 S     | 2082386 | Methylibium sp. Pch-M                 |
| 0     | 5     | 0 G     | 54066   | Xylophilus                            |
| 0     | 5     | 5 S     | 2697032 | Xylophilus rhododendri                |
| 0     | 4     | 0 G     | 318147  | Paucibacter                           |
| 0     | 4     | 0 G1    | 2642959 | unclassified Paucibacter              |
| 0     | 4     | 4 S     | 1768242 | Paucibacter sp. KCTC 42545            |
| 0     | 3     | 0 G     | 212743  | Rhizobacter                           |
| 0     | 2     | 2 S     | 946333  | Rhizobacter gummiphilus               |
| 0     | 1     | 0 G1    | 2640088 | unclassified Rhizobacter              |
| 0     | 1     | 1 S     | 2753607 | Rhizobacter sp. AJA081-3              |
| 0     | 1     | 0 G     | 92793   | Aquabacterium                         |
| 0     | 1     | 1 S     | 1296669 | Aquabacterium olei                    |
| 0.03  | 50    | 0 O     | 206351  | Neisseriales                          |
| 0.02  | 34    | 0 F     | 481     | Neisseriaceae                         |
| 0.01  | 18    | 0 G     | 32257   | Kingella                              |
| 0.01  | 18    | 18 S    | 502     | Kingella denitrificans                |
| 0.01  | 15    | 0 G     | 482     | Neisseria                             |
| 0     | 7     | 7 S     | 490     | Neisseria sicca                       |
| 0     | 5     | 5 S     | 28449   | Neisseria subflava                    |
| 0     | 2     | 2 S     | 495     | Neisseria elongata                    |
| 0     | 1     | 1 S     | 488     | Neisseria mucosa                      |
| 0     | 1     | 0 G     | 538     | Eikenella                             |
| 0     | 1     | 1 S     | 539     | Eikenella corrodens                   |
| 0.01  | 16    | 0 F     | 1499392 | Chromobacteriaceae                    |
| 0.01  | 10    | 0 G     | 568394  | Pseudogulbenkiania                    |
| 0.01  | 10    | 0 G1    | 2642558 | unclassified Pseudogulbenkiania       |
| 0.01  | 10    | 10 S    | 748280  | Pseudogulbenkiania sp. NH8B           |
| 0     | 5     | 0 F1    | 90153   | Chromobacterium group                 |
| 0     | 5     | 0 G     | 535     | Chromobacterium                       |
| 0     | 2     | 2 S     | 536     | Chromobacterium violaceum             |
| 0     | 2     | 2 S     | 2202141 | Chromobacterium phragmitis            |
| 0     | 1     | 1 S     | 1108595 | Chromobacterium vaccinii              |
| 0     | 1     | 0 G     | 407217  | Aquitalea                             |
| 0     | 1     | 1 S     | 1537400 | Aquitalea aquatilis                   |
| 0.01  | 11    | 2 O     | 206389  | Rhodocyclales                         |
| 0     | 7     | 0 F     | 2008794 | Zoogloeaceae                          |
| 0     | 4     | 0 G     | 33057   | Thauera                               |
| 0     | 2     | 0 S     | 59405   | Thauera aromatica                     |
| 0     | 2     | 2 S1    | 44139   | Thauera aromatica K172                |
| 0     | 1     | 1 S     | 1134435 | Thauera humireducens                  |
| 0     | 1     | 1 G1    | 2609274 | unclassified Thauera                  |
| 0     | 3     | 0 G     | 12960   | Azoarcus                              |
| 0     | 3     | 0 G1    | 2629479 | unclassified Azoarcus                 |
| 0     | 3     | 3 S     | 2016596 | Azoarcus sp. M9-3-2                   |
| 0     | 2     | 0 F     | 75787   | Rhodocyclaceae                        |
| 0     | 2     | 1 G     | 146937  | Azospira                              |
| 0     | 1     | 0 S     | 146939  | Azospira oryzae                       |
| 0     | 1     | 1 S1    | 640081  | Azospira oryzae PS                    |
| 0     | 4     | 0 O     | 32003   | Nitrosomonadales                      |
| 0     | 2     | 0 F     | 2772226 | Sulfuricellaceae                      |
| 0     | 1     | 0 G     | 1778653 | Sulfuriferula                         |
| 0     | 1     | 1 S     | 171865  | Sulfuriferula plumbiphila             |
| 0     | 1     | 0 G     | 2772198 | Sulfurimicrobium                      |
| 0     | 1     | 1 S     | 2715678 | Sulfurimicrobium lacus                |
| 0     | 1     | 0 F     | 206379  | Nitrosomonadaceae                     |
| 0     | 1     | 0 G     | 914     | Nitrosomonas                          |
| 0     | 1     | 0 S     | 916     | Nitrosomonas eutropha                 |
| 0     | 1     | 1 S1    | 335283  | Nitrosomonas eutropha C91             |
| 0     | 1     | 0 F     | 2008790 | Thiobacillaceae                       |
| 0     | 1     | 0 G     | 1938335 | Sulfuritortus                         |
| 0     | 1     | 1 S     | 1914471 | Sulfuritortus calidifontis            |
| 22.39 | 40331 | 353 C   | 28211   | Alphaproteobacteria                   |
| 19.55 | 35209 | 79 O    | 204457  | Sphingomonadales                      |
| 19.47 | 35061 | 1294 F  | 41297   | Sphingomonadaceae                     |
| 17.77 | 32003 | 626 G   | 13687   | Sphingomonas                          |
| 16.89 | 30418 | 30418 S | 13689   | Sphingomonas paucimobilis             |
| 0.15  | 277   | 277 S   | 93064   | Sphingomonas koreensis                |
| 0.13  | 236   | 5 G1    | 196159  | unclassified Sphingomonas             |
| 0.03  | 56    | 56 S    | 1961362 | Sphingomonas sp. NIC1                 |
| 0.02  | 44    | 44 S    | 2219696 | Sphingomonas sp. FARSPH               |
| 0.02  | 34    | 34 S    | 2596913 | Sphingomonas sp. NBWT7                |
| 0.01  | 17    | 17 S    | 2759526 | Sphingomonas sp. DH-S5                |
| 0.01  | 16    | 16 S    | 304378  | Sphingomonas sp. IC081                |
| 0.01  | 13    | 13 S    | 2735134 | Sphingomonas sp. AP4-R1               |
| 0.01  | 13    | 13 S    | 1523415 | Sphingomonas sp. AAP5                 |
| 0.01  | 10    | 10 S    | 1938607 | Sphingomonas sp. LM7                  |
| 0     | 8     | 8 S     | 1517554 | Sphingomonas sp. HMP9                 |
| 0     | 7     | 7 S     | 2565555 | Sphingomonas sp. PAMC26645            |
| 0     | 7     | 7 S     | 1390395 | Sphingomonas sp. LK11                 |
| 0     | 4     | 4 S     | 28214   | Sphingomonas sp.                      |
| 0     | 1     | 1 S     | 849864  | Sphingomonas sp. SH                   |
| 0     | 1     | 1 S     | 2653203 | Sphingomonas sp. CL5.1                |
| 0.12  | 211   | 0 S     | 397260  | Sphingomonas sanxanigenens            |

|      |      |        |         |                                             |
|------|------|--------|---------|---------------------------------------------|
| 0.12 | 211  | 211 S1 | 1123269 | Sphingomonas sanxanigenens DSM 19645 = NX02 |
| 0.09 | 155  | 13 S   | 152682  | Sphingomonas melonis                        |
| 0.08 | 142  | 142 S1 | 621456  | Sphingomonas melonis TY                     |
| 0.02 | 32   | 32 S   | 424800  | Sphingomonas insulae                        |
| 0.01 | 20   | 0 S    | 160791  | Sphingomonas wittichii                      |
| 0.01 | 20   | 20 S1  | 392499  | Sphingomonas wittichii RW1                  |
| 0.01 | 17   | 17 S   | 1609977 | Sphingomonas hengshuiensis                  |
| 0    | 5    | 5 S    | 653931  | Sphingomonas alpina                         |
| 0    | 4    | 4 S    | 1549858 | Sphingomonas taxi                           |
| 0    | 2    | 2 S    | 1813879 | Sphingomonas panacisoli                     |
| 0.69 | 1248 | 130 G  | 165695  | Sphingobium                                 |
| 0.17 | 302  | 302 S  | 1673076 | Sphingobium hydrophobicum                   |
| 0.12 | 222  | 222 S  | 13690   | Sphingobium yanoikuyae                      |
| 0.09 | 169  | 47 G1  | 2611147 | unclassified Sphingobium                    |
| 0.02 | 40   | 40 S   | 520734  | Sphingobium sp. RSMS                        |
| 0.02 | 32   | 32 S   | 1315974 | Sphingobium sp. TK5                         |
| 0.02 | 28   | 28 S   | 484429  | Sphingobium sp. YBL2                        |
| 0.01 | 19   | 19 S   | 2082188 | Sphingobium sp. YG1                         |
| 0    | 2    | 2 S    | 2565554 | Sphingobium sp. PAMC28499                   |
| 0    | 1    | 1 S    | 1843368 | Sphingobium sp. RAC03                       |
| 0.08 | 143  | 143 S  | 120107  | Sphingobium cloacae                         |
| 0.07 | 126  | 126 S  | 76947   | Sphingobium herbicidovorans                 |
| 0.05 | 82   | 82 S   | 135719  | Sphingobium amiense                         |
| 0.04 | 65   | 65 S   | 1332080 | Sphingobium baderi                          |
| 0    | 5    | 0 S    | 336203  | Sphingobium fuliginis                       |
| 0    | 5    | 5 S1   | 1208342 | Sphingobium fuliginis ATCC 27551            |
| 0    | 2    | 0 S    | 332056  | Sphingobium japonicum                       |
| 0    | 2    | 2 S1   | 452662  | Sphingobium japonicum UT26S                 |
| 0    | 2    | 2 S    | 1054037 | Sphingobium barthaii                        |
| 0.11 | 204  | 0 G    | 165696  | Novosphingobium                             |
| 0.1  | 177  | 45 G1  | 2644732 | unclassified Novosphingobium                |
| 0.05 | 98   | 98 S   | 164608  | Novosphingobium sp. KA1                     |
| 0.01 | 16   | 16 S   | 702113  | Novosphingobium sp. PP1Y                    |
| 0.01 | 10   | 10 S   | 2780074 | Novosphingobium sp. ES2-1                   |
| 0    | 7    | 7 S    | 2571749 | Novosphingobium sp. ABRDHK2                 |
| 0    | 1    | 1 S    | 1609758 | Novosphingobium sp. P6W                     |
| 0.01 | 22   | 0 S    | 205844  | Novosphingobium pentaromativorans           |
| 0.01 | 22   | 22 S1  | 1088721 | Novosphingobium pentaromativorans US6-1     |
| 0    | 5    | 0 S    | 48935   | Novosphingobium aromaticivorans             |
| 0    | 5    | 5 S1   | 279238  | Novosphingobium aromaticivorans DSM 12444   |
| 0.1  | 186  | 16 G   | 165697  | Sphingopyxis                                |
| 0.07 | 122  | 1 G1   | 2614943 | unclassified Sphingopyxis                   |
| 0.05 | 89   | 89 S   | 292913  | Sphingopyxis sp. 113P3                      |
| 0.01 | 10   | 10 S   | 1914525 | Sphingopyxis sp. FD7                        |
| 0    | 9    | 9 S    | 1874061 | Sphingopyxis sp. EG6                        |
| 0    | 6    | 6 S    | 1357916 | Sphingopyxis sp. QXT-31                     |
| 0    | 4    | 4 S    | 2486273 | Sphingopyxis sp. OPL5                       |
| 0    | 2    | 2 S    | 1866325 | Sphingopyxis sp. MG                         |
| 0    | 1    | 1 S    | 2565556 | Sphingopyxis sp. PAMC25046                  |
| 0.02 | 32   | 32 S   | 33050   | Sphingopyxis macrogoltabida                 |
| 0    | 9    | 0 S    | 117207  | Sphingopyxis alaskensis                     |
| 0    | 9    | 9 S1   | 317655  | Sphingopyxis alaskensis RB2256              |
| 0    | 5    | 5 S    | 1515612 | Sphingopyxis fribergensis                   |
| 0    | 2    | 2 S    | 267128  | Sphingopyxis granuli                        |
| 0.07 | 126  | 0 G    | 1649486 | Rhizorhabdus                                |
| 0.07 | 126  | 126 S  | 1850238 | Rhizorhabdus dicambivorans                  |
| 0.04 | 68   | 4 F    | 335929  | Erythrobacteraceae                          |
| 0.02 | 36   | 0 F1   | 2800788 | Erythrobacter/Porphyrobacter group          |
| 0.02 | 32   | 0 G    | 1041    | Erythrobacter                               |
| 0.02 | 28   | 0 G1   | 2633097 | unclassified Erythrobacter                  |
| 0.01 | 26   | 26 S   | 2785907 | Erythrobacter sp. A30-3                     |
| 0    | 2    | 2 S    | 1798193 | Erythrobacter sp. HL-111                    |
| 0    | 3    | 0 S    | 39960   | Erythrobacter litoralis                     |
| 0    | 3    | 3 S1   | 314225  | Erythrobacter litoralis HTCC2594            |
| 0    | 1    | 1 S    | 1112    | Erythrobacter neustonensis                  |
| 0    | 4    | 0 G    | 1111    | Porphyrobacter                              |
| 0    | 4    | 0 G1   | 2683265 | unclassified Porphyrobacter                 |
| 0    | 2    | 2 S    | 2003315 | Porphyrobacter sp. CACIAM 03H1              |
| 0    | 2    | 2 S    | 2023229 | Porphyrobacter sp. HT-58-2                  |
| 0.01 | 13   | 0 G    | 1295327 | Croceicoccus                                |
| 0    | 9    | 9 S    | 1348774 | Croceicoccus naphthovorans                  |
| 0    | 4    | 0 G1   | 2629967 | unclassified Croceicoccus                   |
| 0    | 4    | 4 S    | 2798724 | Croceicoccus sp. Y147                       |
| 0.01 | 10   | 0 G    | 361177  | Altererythrobacter                          |
| 0    | 9    | 9 S    | 1267766 | Altererythrobacter atlanticus               |
| 0    | 1    | 0 G1   | 2614945 | unclassified Altererythrobacter             |
| 0    | 1    | 1 S    | 2060312 | Altererythrobacter sp. B11                  |
| 0    | 5    | 0 G    | 2800681 | Aurantiacibacter                            |
| 0    | 3    | 3 S    | 1648404 | Aurantiacibacter atlanticus                 |
| 0    | 2    | 2 S    | 502682  | Aurantiacibacter gangiinis                  |
| 0    | 1    | 0 F    | 2820280 | Sphingosinicellaceae                        |
| 0    | 1    | 0 G    | 335405  | Sphingosinicella                            |
| 0    | 1    | 0 G1   | 2644549 | unclassified Sphingosinicella               |
| 0    | 1    | 1 S    | 1892855 | Sphingosinicella sp. BN140058               |
| 2.25 | 4051 | 75 O   | 356     | Hyphomicrobiales                            |
| 1.87 | 3371 | 419 F  | 119045  | Methylobacteriaceae                         |
| 1.25 | 2247 | 176 G  | 2282523 | Methylorubrum                               |
| 0.85 | 1523 | 1433 S | 223967  | Methylorubrum populi                        |
| 0.05 | 90   | 90 S1  | 441620  | Methylorubrum populi BJ001                  |
| 0.3  | 535  | 55 S   | 408     | Methylorubrum extorquens                    |
| 0.21 | 386  | 386 S1 | 272630  | Methylorubrum extorquens AM1                |
| 0.05 | 83   | 83 S1  | 440085  | Methylorubrum extorquens CM4                |
| 0.01 | 11   | 11 S1  | 419610  | Methylorubrum extorquens PA1                |
| 0.01 | 13   | 13 S   | 29429   | Methylorubrum zatmanii                      |
| 0.39 | 697  | 107 G  | 407     | Methylobacterium                            |
| 0.27 | 478  | 232 G1 | 2615210 | unclassified Methylobacterium               |
| 0.06 | 111  | 111 S  | 2067957 | Methylobacterium sp. DM1                    |
| 0.04 | 67   | 67 S   | 925818  | Methylobacterium sp. AM55                   |
| 0.02 | 28   | 28 S   | 2202828 | Methylobacterium sp. 17Sr1-43               |
| 0.01 | 23   | 23 S   | 739141  | Methylobacterium sp. XJLW                   |
| 0    | 9    | 9 S    | 426117  | Methylobacterium sp. 4-46                   |
| 0    | 7    | 7 S    | 2603276 | Methylobacterium sp. WL1                    |
| 0    | 1    | 1 S    | 2202826 | Methylobacterium sp. 17Sr1-1                |
| 0.02 | 39   | 39 S   | 2202825 | Methylobacterium durans                     |

|      |     |       |         |                                                    |
|------|-----|-------|---------|----------------------------------------------------|
| 0.01 | 25  | 25 S  | 269660  | Methylobacterium brachiatum                        |
| 0.01 | 18  | 0 S   | 39956   | Methylobacterium mesophilicum                      |
| 0.01 | 18  | 18 S1 | 908290  | Methylobacterium mesophilicum SR1.6/6              |
| 0.01 | 12  | 12 S  | 270351  | Methylobacterium aquaticum                         |
| 0    | 7   | 0 S   | 31998   | Methylobacterium radiotolerans                     |
| 0    | 7   | 7 S1  | 426355  | Methylobacterium radiotolerans JCM 2831            |
| 0    | 5   | 5 S   | 418223  | Methylobacterium phyllosphaerae                    |
| 0    | 3   | 3 S   | 2051553 | Methylobacterium currus                            |
| 0    | 2   | 0 S   | 114616  | Methylobacterium nodulans                          |
| 0    | 2   | 2 S1  | 460265  | Methylobacterium nodulans ORS 2060                 |
| 0    | 1   | 0 S   | 334852  | Methylobacterium oryzae                            |
| 0    | 1   | 1 S1  | 693986  | Methylobacterium oryzae CBMB20                     |
| 0    | 8   | 0 G   | 186650  | Microvirga                                         |
| 0    | 5   | 5 S   | 1882682 | Microvirga ossetica                                |
| 0    | 3   | 0 G1  | 2617746 | unclassified Microvirga                            |
| 0    | 3   | 3 S   | 2807101 | Microvirga sp. VF16                                |
| 0.13 | 226 | 3 F   | 41294   | Bradyrhizobiaceae                                  |
| 0.06 | 117 | 4 G   | 85413   | Bosea                                              |
| 0.06 | 106 | 13 G1 | 2653178 | unclassified Bosea                                 |
| 0.02 | 45  | 45 S  | 1842539 | Bosea sp. RAC05                                    |
| 0.01 | 13  | 13 S  | 1867715 | Bosea sp. Tri-49                                   |
| 0.01 | 10  | 10 S  | 2020412 | Bosea sp. ANAM02                                   |
| 0    | 9   | 9 S   | 2015316 | Bosea sp. AS-1                                     |
| 0    | 8   | 8 S   | 1792307 | Bosea sp. PAMC 26642                               |
| 0    | 8   | 8 S   | 2599640 | Bosea sp. F3-2                                     |
| 0    | 7   | 7 S   | 1526658 | Bosea vaviloviae                                   |
| 0.05 | 94  | 39 G  | 374     | Bradyrhizobium                                     |
| 0.02 | 33  | 9 G1  | 2631580 | unclassified Bradyrhizobium                        |
| 0    | 9   | 9 S   | 2057741 | Bradyrhizobium sp. SK17                            |
| 0    | 6   | 6 S   | 2715960 | Bradyrhizobium sp. PSBB068                         |
| 0    | 3   | 3 S   | 1325102 | Bradyrhizobium sp. CCBau 51765                     |
| 0    | 3   | 3 S   | 2493093 | Bradyrhizobium sp. LCT2                            |
| 0    | 2   | 2 S   | 1325114 | Bradyrhizobium sp. CCBau 53351                     |
| 0    | 1   | 1 S   | 858422  | Bradyrhizobium sp. CCBau 051011                    |
| 0    | 5   | 5 S   | 190148  | Bradyrhizobium paxillari                           |
| 0    | 5   | 5 S   | 1437360 | Bradyrhizobium erythrophlei                        |
| 0    | 3   | 0 S   | 44255   | Bradyrhizobium oligotrophicum                      |
| 0    | 3   | 3 S1  | 1245469 | Bradyrhizobium oligotrophicum S58                  |
| 0    | 3   | 3 S   | 244734  | Bradyrhizobium betae                               |
| 0    | 3   | 3 S   | 858423  | Bradyrhizobium arachidis                           |
| 0    | 2   | 2 S   | 83637   | Bradyrhizobium genosp. L                           |
| 0    | 1   | 1 S   | 1404864 | Bradyrhizobium cosmicum                            |
| 0    | 6   | 0 G   | 1073    | Rhodopseudomonas                                   |
| 0    | 6   | 0 S   | 1076    | Rhodopseudomonas palustris                         |
| 0    | 6   | 6 S1  | 316056  | Rhodopseudomonas palustris BisB18                  |
| 0    | 3   | 0 G   | 1033    | Afipia                                             |
| 0    | 3   | 3 S   | 40137   | Afipia carboxidovorans                             |
| 0    | 3   | 0 G   | 1395974 | Tardiphaga                                         |
| 0    | 2   | 2 S   | 943830  | Tardiphaga robiniae                                |
| 0    | 1   | 1 G1  | 2631404 | unclassified Tardiphaga                            |
| 0.12 | 223 | 23 F  | 82115   | Rhizobiaceae                                       |
| 0.1  | 172 | 23 F1 | 227290  | Rhizobium/Agrobacterium group                      |
| 0.04 | 80  | 9 G   | 357     | Agrobacterium                                      |
| 0.03 | 63  | 5 G1  | 1183400 | Agrobacterium tumefaciens complex                  |
| 0.03 | 58  | 55 S  | 358     | Agrobacterium tumefaciens                          |
| 0    | 3   | 3 S1  | 311403  | Agrobacterium radiobacter K84                      |
| 0    | 5   | 5 S   | 359     | Agrobacterium rhizogenes                           |
| 0    | 3   | 3 S   | 160699  | Agrobacterium larrymoorei                          |
| 0.04 | 68  | 30 G  | 379     | Rhizobium                                          |
| 0.01 | 16  | 10 G1 | 2613769 | unclassified Rhizobium                             |
| 0    | 3   | 3 S   | 1869170 | Rhizobium sp. S41                                  |
| 0    | 2   | 2 S   | 1571470 | Rhizobium sp. ACO-34A                              |
| 0    | 1   | 1 S   | 1981173 | Rhizobium sp. NXC14                                |
| 0    | 7   | 7 S   | 648995  | Rhizobium pusense                                  |
| 0    | 6   | 6 S   | 2267833 | Rhizobium oryzae                                   |
| 0    | 4   | 4 S   | 384     | Rhizobium leguminosarum                            |
| 0    | 2   | 2 S   | 396     | Rhizobium phaseoli                                 |
| 0    | 2   | 2 S   | 1138190 | Rhizobium binae                                    |
| 0    | 1   | 1 S   | 56730   | Rhizobium gallicum                                 |
| 0    | 1   | 0 G   | 1525371 | Neorhizobium                                       |
| 0    | 1   | 0 S   | 399     | Neorhizobium galegae                               |
| 0    | 1   | 0 S1  | 323655  | Neorhizobium galegae bv. orientalis                |
| 0    | 1   | 1 S2  | 1028800 | Neorhizobium galegae bv. orientalis str. HAMBI 540 |
| 0.01 | 16  | 0 G   | 323620  | Shinella                                           |
| 0.01 | 16  | 0 G1  | 2643062 | unclassified Shinella                              |
| 0.01 | 12  | 12 S  | 2715959 | Shinella sp. PSBB067                               |
| 0    | 4   | 4 S   | 879274  | Shinella sp. HZN7                                  |
| 0.01 | 12  | 3 F1  | 227292  | Sinorhizobium/Ensifer group                        |
| 0    | 8   | 0 G   | 28105   | Sinorhizobium                                      |
| 0    | 3   | 3 S   | 194963  | Sinorhizobium americanum                           |
| 0    | 2   | 2 S   | 382     | Sinorhizobium meliloti                             |
| 0    | 2   | 0 G1  | 2613772 | unclassified Sinorhizobium                         |
| 0    | 2   | 2 S   | 1449788 | Sinorhizobium sp. LM21                             |
| 0    | 1   | 0 S   | 110321  | Sinorhizobium medicae                              |
| 0    | 1   | 1 S1  | 366394  | Sinorhizobium medicae WSM419                       |
| 0    | 1   | 1 G   | 106591  | Ensifer                                            |
| 0.05 | 88  | 0 F   | 69277   | Phyllobacteriaceae                                 |
| 0.03 | 48  | 0 G   | 31988   | Aminobacter                                        |
| 0.03 | 48  | 0 G1  | 2644704 | unclassified Aminobacter                           |
| 0.03 | 46  | 46 S  | 2774562 | Aminobacter sp. SR38                               |
| 0    | 2   | 2 S   | 374606  | Aminobacter sp. MSH1                               |
| 0.02 | 39  | 7 G   | 68287   | Mesorhizobium                                      |
| 0.01 | 16  | 5 G1  | 325217  | unclassified Mesorhizobium                         |
| 0    | 6   | 6 S   | 2744521 | Mesorhizobium sp. L-2-11                           |
| 0    | 3   | 3 S   | 2744518 | Mesorhizobium sp. 131-2-1                          |
| 0    | 1   | 1 S   | 1854057 | Mesorhizobium sp. AA22                             |
| 0    | 1   | 1 S   | 2493673 | Mesorhizobium sp. M18.F.Ca.ET.045.04.1.1           |
| 0    | 5   | 0 S   | 39645   | Mesorhizobium ciceri                               |
| 0    | 5   | 5 S1  | 682633  | Mesorhizobium ciceri ca181                         |
| 0    | 4   | 4 S   | 1670800 | Mesorhizobium oceanicum                            |
| 0    | 3   | 0 S   | 381     | Mesorhizobium loti                                 |
| 0    | 3   | 3 S1  | 935548  | Mesorhizobium loti R88b                            |
| 0    | 2   | 2 S   | 28104   | Mesorhizobium huakuii                              |
| 0    | 2   | 0 S   | 593909  | Mesorhizobium opportunistum                        |

|      |     |       |         |                                        |
|------|-----|-------|---------|----------------------------------------|
| 0    | 2   | 2 S1  | 536019  | Mesorhizobium opportunistum WSM2075    |
| 0    | 1   | 0 G   | 449972  | Chelativorans                          |
| 0    | 1   | 0 G1  | 2643807 | unclassified Chelativorans             |
| 0    | 1   | 1 S   | 266779  | Chelativorans sp. BNC1                 |
| 0.01 | 23  | 0 F   | 118882  | Brucellaceae                           |
| 0.01 | 23  | 9 F1  | 2826938 | Brucella/Ochrobactrum group            |
| 0    | 8   | 0 G   | 234     | Brucella                               |
| 0    | 7   | 7 S   | 271865  | [Ochrobactrum] quorumnocens            |
| 0    | 1   | 1 S   | 529     | Brucella anthropi                      |
| 0    | 6   | 0 G   | 528     | Ochrobactrum                           |
| 0    | 6   | 0 G1  | 239106  | unclassified Ochrobactrum              |
| 0    | 5   | 5 S   | 1449781 | Ochrobactrum sp. LM19                  |
| 0    | 1   | 1 S   | 2726427 | Ochrobactrum sp. MT180101              |
| 0.01 | 14  | 0 F   | 255475  | Aurantimonadaceae                      |
| 0.01 | 12  | 2 G   | 293088  | Martella                               |
| 0.01 | 10  | 0 S   | 293089  | Martella mediterranea                  |
| 0.01 | 10  | 10 S1 | 1122214 | Martella mediterranea DSM 17316        |
| 0    | 2   | 0 G   | 414371  | Aureimonas                             |
| 0    | 1   | 1 S   | 1701758 | Aureimonas populi                      |
| 0    | 1   | 0 G1  | 2615206 | unclassified Aureimonas                |
| 0    | 1   | 1 S   | 2816454 | Aureimonas sp. OT7                     |
| 0.01 | 10  | 5 F   | 335928  | Xanthobacteraceae                      |
| 0    | 2   | 0 G   | 6       | Azorhizobium                           |
| 0    | 2   | 0 S   | 7       | Azorhizobium caulinodans               |
| 0    | 2   | 2 S1  | 438753  | Azorhizobium caulinodans ORS 571       |
| 0    | 2   | 0 G   | 556257  | Pseudolabrys                           |
| 0    | 2   | 2 S   | 331696  | Pseudolabrys taiwanensis               |
| 0    | 1   | 0 G   | 99      | Ancylobacter                           |
| 0    | 1   | 0 G1  | 2626613 | unclassified Ancylobacter              |
| 0    | 1   | 1 S   | 1850374 | Ancylobacter sp. TS-1                  |
| 0.01 | 10  | 0 F   | 2821832 | Stappiaceae                            |
| 0    | 7   | 0 G   | 227873  | Pannonibacter                          |
| 0    | 7   | 2 S   | 121719  | Pannonibacter phragmitetus             |
| 0    | 5   | 5 S1  | 1402210 | Pannonibacter phragmitetus BB          |
| 0    | 3   | 0 G   | 478070  | Labrenzia                              |
| 0    | 3   | 3 G1  | 2648686 | unclassified Labrenzia                 |
| 0    | 4   | 0 F   | 45401   | Hyphomicrobiaceae                      |
| 0    | 3   | 0 G   | 46913   | Devosia                                |
| 0    | 3   | 1 G1  | 196773  | unclassified Devosia                   |
| 0    | 2   | 2 S   | 2499144 | Devosia sp. 1566                       |
| 0    | 1   | 0 G   | 45402   | Aquabacter                             |
| 0    | 1   | 0 G1  | 2663263 | unclassified Aquabacter                |
| 0    | 1   | 1 S   | 2820278 | Aquabacter sp. L1I39                   |
| 0    | 4   | 0 O1  | 119042  | Rhizobiales incertae sedis             |
| 0    | 4   | 0 G   | 1734920 | Pseudorhodoplanes                      |
| 0    | 4   | 4 S   | 1235591 | Pseudorhodoplanes sinuspersici         |
| 0    | 2   | 0 F   | 45404   | Beijerinckiaceae                       |
| 0    | 2   | 0 G   | 120652  | Methylocella                           |
| 0    | 2   | 0 S   | 199596  | Methylocella silvestris                |
| 0    | 2   | 2 S1  | 395965  | Methylocella silvestris BL2            |
| 0    | 1   | 0 F   | 655351  | Cohaesibacteraceae                     |
| 0    | 1   | 0 G   | 1406135 | Breoghania                             |
| 0    | 1   | 0 G1  | 2624130 | unclassified Breoghania                |
| 0    | 1   | 1 S   | 2304600 | Breoghania sp. L-A4                    |
| 0.24 | 424 | 0 O   | 204458  | Caulobacterales                        |
| 0.24 | 424 | 18 F  | 76892   | Caulobacteraceae                       |
| 0.21 | 377 | 112 G | 41275   | Brevundimonas                          |
| 0.09 | 165 | 38 G1 | 2622653 | unclassified Brevundimonas             |
| 0.01 | 21  | 21 S  | 2774190 | Brevundimonas sp. LVF2                 |
| 0.01 | 21  | 21 S  | 2813778 | Brevundimonas sp. CS1                  |
| 0.01 | 20  | 20 S  | 2591463 | Brevundimonas sp. M20                  |
| 0.01 | 16  | 16 S  | 2579977 | Brevundimonas sp. SGAir0440            |
| 0.01 | 15  | 15 S  | 2752515 | Brevundimonas sp. AJA228-03            |
| 0.01 | 12  | 12 S  | 2774189 | Brevundimonas sp. LVF1                 |
| 0    | 7   | 7 S   | 2800818 | Brevundimonas sp. GRTSA-9              |
| 0    | 6   | 6 S   | 1938605 | Brevundimonas sp. LM2                  |
| 0    | 4   | 4 S   | 2561924 | Brevundimonas sp. MF30-B               |
| 0    | 4   | 4 S   | 2562582 | Brevundimonas sp. 'scallop'            |
| 0    | 1   | 1 S   | 1827469 | Brevundimonas sp. GW460-12-10-14-LB2   |
| 0.02 | 44  | 44 S  | 588932  | Brevundimonas naejangsensis            |
| 0.02 | 32  | 32 S  | 293     | Brevundimonas diminuta                 |
| 0.01 | 11  | 0 S   | 74313   | Brevundimonas subvibrioides            |
| 0.01 | 11  | 11 S1 | 633149  | Brevundimonas subvibrioides ATCC 15264 |
| 0.01 | 11  | 11 S  | 74329   | Brevundimonas mediterranea             |
| 0    | 1   | 1 S   | 41276   | Brevundimonas vesicularis              |
| 0    | 1   | 1 S   | 1325724 | Brevundimonas vancouverii              |
| 0.01 | 25  | 9 G   | 75      | Caulobacter                            |
| 0    | 8   | 8 S   | 155892  | Caulobacter vibrioides                 |
| 0    | 4   | 0 G1  | 2648921 | unclassified Caulobacter               |
| 0    | 4   | 4 S   | 69665   | Caulobacter sp. FWC26                  |
| 0    | 3   | 3 S   | 2708539 | Caulobacter soli                       |
| 0    | 1   | 1 S   | 1679497 | Caulobacter flavus                     |
| 0    | 4   | 0 G   | 76890   | Asticcacaulis                          |
| 0    | 4   | 1 S   | 78587   | Asticcacaulis excentricus              |
| 0    | 3   | 3 S1  | 573065  | Asticcacaulis excentricus CB 48        |
| 0.11 | 206 | 0 O   | 204455  | Rhodobacterales                        |
| 0.11 | 206 | 13 F  | 31989   | Rhodobacteraceae                       |
| 0.07 | 125 | 14 G  | 265     | Paracoccus                             |
| 0.03 | 54  | 0 G1  | 246570  | unclassified Paracoccus                |
| 0.03 | 49  | 49 S  | 2500532 | Paracoccus sp. Arc7-R13                |
| 0    | 3   | 3 S   | 2589076 | Paracoccus sp. AK26                    |
| 0    | 2   | 2 S   | 2812658 | Paracoccus sp. H4-D09                  |
| 0.02 | 34  | 34 S  | 147645  | Paracoccus yeei                        |
| 0    | 9   | 9 S   | 266     | Paracoccus denitrificans               |
| 0    | 5   | 0 S   | 34003   | Paracoccus aminophilus                 |
| 0    | 5   | 5 S1  | 1367847 | Paracoccus aminophilus JCM 7686        |
| 0    | 3   | 3 S   | 453842  | Paracoccus aestuarii                   |
| 0    | 3   | 3 S   | 2560053 | Paracoccus liaowanqingii               |
| 0    | 1   | 1 S   | 82367   | Paracoccus pantotrophus                |
| 0    | 1   | 1 S   | 1545044 | Paracoccus sanguinis                   |
| 0    | 1   | 1 S   | 1945662 | Paracoccus contaminans                 |
| 0.01 | 18  | 0 G   | 366614  | Haematobacter                          |
| 0.01 | 18  | 18 S  | 195105  | Haematobacter massiliensis             |
| 0.01 | 12  | 0 G   | 1097466 | Deffluviimonas                         |

|      |       |        |         |                                            |
|------|-------|--------|---------|--------------------------------------------|
| 0.01 | 12    | 12 S   | 1335048 | Defluviimonas alba                         |
| 0    | 9     | 0 G    | 92944   | Ketogulonicigenium                         |
| 0    | 9     | 9 S    | 92945   | Ketogulonicigenium vulgare                 |
| 0    | 5     | 0 G    | 2816884 | Qingshengfaniella                          |
| 0    | 5     | 5 S    | 2599296 | Qingshengfaniella alkalisolii              |
| 0    | 5     | 0 G    | 1060    | Rhodobacter                                |
| 0    | 5     | 5 S    | 1075    | Rhodobacter blasticus                      |
| 0    | 5     | 5 G    | 302485  | Phaeobacter                                |
| 0    | 3     | 0 G    | 991903  | Polymorphum                                |
| 0    | 3     | 0 S    | 991904  | Polymorphum gilvum                         |
| 0    | 3     | 3 S1   | 991905  | Polymorphum gilvum SL003B-26A1             |
| 0    | 2     | 0 G    | 2613960 | Pseudopuniceibacterium                     |
| 0    | 2     | 2 S    | 2613965 | Pseudopuniceibacterium antarcticum         |
| 0    | 2     | 0 G    | 1855413 | Brevirhabdus                               |
| 0    | 2     | 2 S    | 1267768 | Brevirhabdus pacifica                      |
| 0    | 2     | 0 G    | 875170  | Celeribacter                               |
| 0    | 2     | 2 S    | 1208324 | Celeribacter indicus                       |
| 0    | 1     | 0 G    | 74030   | Roseovarius                                |
| 0    | 1     | 0 G1   | 2614913 | unclassified Roseovarius                   |
| 0    | 1     | 0 S    | 391613  | Roseovarius sp. TM1035                     |
| 0    | 1     | 1 S1   | 2203213 | Roseovarius sp. AK1035                     |
| 0    | 1     | 0 G    | 74032   | Antarctobacter                             |
| 0    | 1     | 1 S    | 74033   | Antarctobacter heliothermus                |
| 0    | 1     | 0 G    | 1653176 | Cereibacter                                |
| 0    | 1     | 1 S    | 1063    | Cereibacter sphaeroides                    |
| 0    | 1     | 0 G    | 159345  | Roseibacterium                             |
| 0    | 1     | 0 S    | 159346  | Roseibacterium elongatum                   |
| 0    | 1     | 1 S1   | 1294273 | Roseibacterium elongatum DSM 19469         |
| 0    | 1     | 0 G    | 335927  | Thalassobius                               |
| 0    | 1     | 1 S    | 53501   | Thalassobius gelatinovorans                |
| 0.04 | 75    | 2 O    | 204441  | Rhodospirillales                           |
| 0.03 | 57    | 0 F    | 41295   | Rhodospirillaceae                          |
| 0.02 | 31    | 0 G    | 1543704 | Niveispirillum                             |
| 0.02 | 31    | 31 S   | 1612173 | Niveispirillum cyanobacteriorum            |
| 0    | 8     | 0 G    | 1612157 | Pararhodospirillum                         |
| 0    | 8     | 0 S    | 1084    | Pararhodospirillum photometricum           |
| 0    | 8     | 8 S1   | 1150469 | Pararhodospirillum photometricum DSM 122   |
| 0    | 7     | 0 G    | 2705399 | Hypericibacter                             |
| 0    | 7     | 7 S    | 2602015 | Hypericibacter terrae                      |
| 0    | 6     | 1 G    | 191     | Azospirillum                               |
| 0    | 4     | 4 S    | 192     | Azospirillum brasilense                    |
| 0    | 1     | 0 G1   | 2630922 | unclassified Azospirillum                  |
| 0    | 1     | 1 S    | 652764  | Azospirillum sp. TSH100                    |
| 0    | 4     | 0 G    | 2478349 | Indioceanicola                             |
| 0    | 4     | 4 S    | 2220096 | Indioceanicola profundus                   |
| 0    | 1     | 0 G    | 1543705 | Nitrospirillum                             |
| 0    | 1     | 0 S    | 28077   | Nitrospirillum amazonense                  |
| 0    | 1     | 1 S1   | 1441467 | Nitrospirillum amazonense CBAmc            |
| 0.01 | 16    | 3 F    | 433     | Acetobacteraceae                           |
| 0    | 4     | 0 G    | 2603324 | Acidibrevibacterium                        |
| 0    | 4     | 4 S    | 1969806 | Acidibrevibacterium fodiaquatile           |
| 0    | 3     | 0 G    | 1434011 | Komagataebacter                            |
| 0    | 2     | 2 S    | 28448   | Komagataebacter xylinus                    |
| 0    | 1     | 1 S    | 265960  | Komagataebacter nataicola                  |
| 0    | 2     | 0 G    | 125216  | Roseomonas                                 |
| 0    | 1     | 1 S    | 207340  | Roseomonas mucosa                          |
| 0    | 1     | 0 G1   | 2617492 | unclassified Roseomonas                    |
| 0    | 1     | 1 S    | 2768161 | Roseomonas sp. 1318                        |
| 0    | 2     | 0 G    | 2804525 | Lichenicola                                |
| 0    | 2     | 2 S    | 1484109 | Lichenicola cladoniae                      |
| 0    | 1     | 1 G    | 441     | Gluconobacter                              |
| 0    | 1     | 0 G    | 35812   | Roseococcus                                |
| 0    | 1     | 0 G1   | 2639982 | unclassified Roseococcus                   |
| 0    | 1     | 1 S    | 2771361 | Roseococcus sp. NIBR12                     |
| 0    | 9     | 0 C1   | 82117   | Alphaproteobacteria incertae sedis         |
| 0    | 9     | 0 G    | 1632780 | Phreatobacter                              |
| 0    | 9     | 9 S    | 1940610 | Phreatobacter stygius                      |
| 0    | 2     | 0 O    | 766     | Rickettsiales                              |
| 0    | 1     | 0 F    | 942     | Anaplasmatidae                             |
| 0    | 1     | 0 F1   | 952     | Wolbachiae                                 |
| 0    | 1     | 0 G    | 953     | Wolbachia                                  |
| 0    | 1     | 0 G1   | 2640676 | unclassified Wolbachia                     |
| 0    | 1     | 1 S    | 169402  | Wolbachia endosymbiont of Folsomia candida |
| 0    | 1     | 0 F    | 1328881 | Candidatus Midichloriaceae                 |
| 0    | 1     | 0 G    | 1802983 | Candidatus Fokinia                         |
| 0    | 1     | 1 S    | 1802984 | Candidatus Fokinia solitaria               |
| 0    | 2     | 0 O    | 2800059 | Maricaulales                               |
| 0    | 2     | 0 F    | 2800061 | Maricaulaceae                              |
| 0    | 2     | 0 G    | 1649466 | Marinicauda                                |
| 0    | 2     | 2 S    | 2029849 | Marinicauda algicola                       |
| 8    | 14411 | 119 C  | 1236    | Gammaaproteobacteria                       |
| 6.02 | 10837 | 12 O   | 135614  | Xanthomonadales                            |
| 6.01 | 10820 | 247 F  | 32033   | Xanthomonadaceae                           |
| 5.83 | 10504 | 1358 G | 40323   | Stenotrophomonas                           |
| 5    | 9008  | 162 G1 | 995085  | Stenotrophomonas maltophilia group         |
| 4.9  | 8832  | 7952 S | 40324   | Stenotrophomonas maltophilia               |
| 0.44 | 784   | 784 S1 | 391008  | Stenotrophomonas maltophilia R551-3        |
| 0.05 | 86    | 86 S1  | 522373  | Stenotrophomonas maltophilia K279a         |
| 0    | 8     | 8 S1   | 868597  | Stenotrophomonas maltophilia JV3           |
| 0    | 2     | 2 S1   | 1163399 | Stenotrophomonas maltophilia D457          |
| 0    | 8     | 8 S    | 2072413 | Stenotrophomonas sp. SAU14A_NAIMI4_5       |
| 0    | 3     | 3 S    | 2072408 | Stenotrophomonas sp. YAU14A_MKIMI4_1       |
| 0    | 1     | 1 S    | 2072407 | Stenotrophomonas sp. YAU14D1_LEIMI4_1      |
| 0    | 1     | 1 S    | 2072412 | Stenotrophomonas sp. ZAC14A_NAIMI4_1       |
| 0    | 1     | 1 S    | 2072414 | Stenotrophomonas sp. ESTM1D_MKICP4_1       |
| 0.05 | 85    | 4 G1   | 196198  | unclassified Stenotrophomonas              |
| 0.01 | 24    | 24 S   | 1904944 | Stenotrophomonas sp. LM091                 |
| 0.01 | 18    | 18 S   | 2005046 | Stenotrophomonas sp. WZN-1                 |
| 0.01 | 15    | 15 S   | 2682487 | Stenotrophomonas sp. SXG-1                 |
| 0    | 9     | 9 S    | 2282124 | Stenotrophomonas sp. ASS1                  |
| 0    | 7     | 7 S    | 2691571 | Stenotrophomonas sp. 364                   |
| 0    | 6     | 6 S    | 2742129 | Stenotrophomonas sp. NA06056               |
| 0    | 1     | 1 S    | 1827305 | Stenotrophomonas sp. MYb57                 |
| 0    | 1     | 1 S    | 2303750 | Stenotrophomonas sp. G4                    |



|      |      |       |         |                                                   |
|------|------|-------|---------|---------------------------------------------------|
| 0.02 | 37   | 37 S  | 216778  | Stenotrophomonas rhizophila                       |
| 0.01 | 16   | 16 S  | 128780  | Stenotrophomonas acidaminiphila                   |
| 0.02 | 28   | 10 G  | 338     | Xanthomonas                                       |
| 0    | 9    | 0 G1  | 643453  | Xanthomonas citri group                           |
| 0    | 9    | 6 S   | 346     | Xanthomonas citri                                 |
| 0    | 2    | 2 S1  | 473421  | Xanthomonas citri pv. glycines                    |
| 0    | 1    | 1 S1  | 76802   | Xanthomonas citri pv. aurantifolii                |
| 0    | 6    | 6 S   | 442694  | Xanthomonas perforans                             |
| 0    | 3    | 3 S   | 347     | Xanthomonas oryzae                                |
| 0.01 | 23   | 0 G   | 83618   | Pseudoxanthomonas                                 |
| 0.01 | 23   | 23 S  | 128785  | Pseudoxanthomonas mexicana                        |
| 0.01 | 11   | 5 G   | 68      | Lysobacter                                        |
| 0    | 2    | 2 S   | 69      | Lysobacter enzymogenes                            |
| 0    | 2    | 0 G1  | 2635362 | unclassified Lysobacter                           |
| 0    | 2    | 2 S   | 2290922 | Lysobacter sp. TY2-98                             |
| 0    | 1    | 1 S   | 2591633 | Lysobacter alkalisolii                            |
| 0    | 1    | 1 S   | 2763317 | Lysobacter solisilvae                             |
| 0    | 4    | 0 G   | 141948  | Thermomonas                                       |
| 0    | 2    | 2 S   | 1463158 | Thermomonas carbonis                              |
| 0    | 2    | 0 G1  | 2633315 | unclassified Thermomonas                          |
| 0    | 2    | 2 S   | 2771436 | Thermomonas sp. XSG                               |
| 0    | 3    | 0 G   | 83614   | Luteimonas                                        |
| 0    | 3    | 0 G1  | 2629088 | unclassified Luteimonas                           |
| 0    | 3    | 3 S   | 1896164 | Luteimonas sp. JM171                              |
| 0    | 5    | 0 F   | 1775411 | Rhodanobacteraceae                                |
| 0    | 3    | 0 G   | 242605  | Luteibacter                                       |
| 0    | 2    | 0 S   | 242606  | Luteibacter rhizovicius                           |
| 0    | 2    | 2 S1  | 1440763 | Luteibacter rhizovicius DSM 16549                 |
| 0    | 1    | 1 S   | 2589080 | Luteibacter pinisoli                              |
| 0    | 2    | 0 G   | 231454  | Dyella                                            |
| 0    | 1    | 1 S   | 445710  | Dyella thiooxydans                                |
| 0    | 1    | 1 S   | 1849581 | Dyella caseinilytica                              |
| 1.62 | 2919 | 4 O   | 72274   | Pseudomonadales                                   |
| 1.09 | 1962 | 12 F  | 468     | Moraxellaceae                                     |
| 1.04 | 1866 | 665 G | 469     | Acinetobacter                                     |
| 0.43 | 779  | 766 S | 40214   | Acinetobacter johnsonii                           |
| 0.01 | 13   | 13 S1 | 1242245 | Acinetobacter johnsonii XBB1                      |
| 0.05 | 87   | 87 S  | 40215   | Acinetobacter junii                               |
| 0.04 | 76   | 2 G1  | 196816  | unclassified Acinetobacter                        |
| 0.01 | 20   | 20 S  | 2743575 | Acinetobacter sp. NEB 394                         |
| 0.01 | 17   | 17 S  | 2004646 | Acinetobacter sp. WCHA55                          |
| 0.01 | 17   | 17 S  | 2004644 | Acinetobacter sp. WCHA45                          |
| 0    | 8    | 8 S   | 2601122 | Acinetobacter sp. YH12138                         |
| 0    | 5    | 5 S   | 1636603 | Acinetobacter sp. ACNIH1                          |
| 0    | 2    | 2 S   | 2545797 | Acinetobacter sp. FDAARGOS_724                    |
| 0    | 2    | 2 S   | 1646498 | Acinetobacter sp. TTH0-4                          |
| 0    | 1    | 1 S   | 1280052 | Acinetobacter sp. M131                            |
| 0    | 1    | 1 S   | 1879049 | Acinetobacter sp. WCHAc010034                     |
| 0    | 1    | 1 S   | 1758189 | Acinetobacter sp. ACNIH2                          |
| 0.03 | 62   | 15 G1 | 909768  | Acinetobacter calcoaceticus/baumannii complex     |
| 0.02 | 40   | 40 S  | 470     | Acinetobacter baumannii                           |
| 0    | 4    | 4 S   | 1530123 | Acinetobacter seifertii                           |
| 0    | 3    | 1 S   | 48296   | Acinetobacter pittii                              |
| 0    | 2    | 2 S1  | 871585  | Acinetobacter pittii PHEA-2                       |
| 0.02 | 30   | 30 S  | 202956  | Acinetobacter townneri                            |
| 0.01 | 23   | 23 S  | 756892  | Acinetobacter indicus                             |
| 0.01 | 21   | 19 S  | 28090   | Acinetobacter lwoffii                             |
| 0    | 2    | 2 S1  | 1046625 | Acinetobacter lwoffii WJ10621                     |
| 0.01 | 21   | 21 S  | 29430   | Acinetobacter haemolyticus                        |
| 0.01 | 19   | 19 S  | 108980  | Acinetobacter ursingii                            |
| 0.01 | 16   | 16 S  | 108981  | Acinetobacter schindleri                          |
| 0.01 | 16   | 16 S  | 134534  | Acinetobacter gyllenbergii                        |
| 0.01 | 14   | 14 S  | 106648  | Acinetobacter bereziniae                          |
| 0.01 | 13   | 13 S  | 1879050 | Acinetobacter wuhoensis                           |
| 0    | 9    | 0 S   | 52133   | Acinetobacter venetianus                          |
| 0    | 9    | 9 S1  | 1197884 | Acinetobacter venetianus VE-C3                    |
| 0    | 6    | 6 S   | 2715164 | Acinetobacter shaoyimingii                        |
| 0    | 5    | 5 S   | 40216   | Acinetobacter radioresistens                      |
| 0    | 2    | 2 S   | 70348   | Acinetobacter dispersus                           |
| 0    | 1    | 1 S   | 487316  | Acinetobacter soli                                |
| 0    | 1    | 1 S   | 2006115 | Acinetobacter piscicola                           |
| 0.04 | 69   | 0 G   | 475     | Moraxella                                         |
| 0.04 | 69   | 69 S  | 34062   | Moraxella osloensis                               |
| 0.01 | 14   | 0 G   | 497     | Psychrobacter                                     |
| 0    | 9    | 0 G1  | 196806  | unclassified Psychrobacter                        |
| 0    | 7    | 7 S   | 2733866 | Psychrobacter sp. KCTC 72983                      |
| 0    | 2    | 2 S   | 1699621 | Psychrobacter sp. P11F6                           |
| 0    | 5    | 0 S   | 334543  | Psychrobacter arcticus                            |
| 0    | 5    | 5 S1  | 259536  | Psychrobacter arcticus 273-4                      |
| 0    | 1    | 0 G   | 2824158 | Aquirhabdus                                       |
| 0    | 1    | 1 S   | 2283318 | Aquirhabdus parva                                 |
| 0.53 | 953  | 0 F   | 135621  | Pseudomonadaceae                                  |
| 0.53 | 953  | 219 G | 286     | Pseudomonas                                       |
| 0.22 | 402  | 0 G1  | 136841  | Pseudomonas aeruginosa group                      |
| 0.18 | 320  | 320 S | 287     | Pseudomonas aeruginosa                            |
| 0.02 | 40   | 28 S  | 300     | Pseudomonas mendocina                             |
| 0.01 | 11   | 11 S1 | 1225174 | Pseudomonas mendocina S5.2                        |
| 0    | 1    | 1 S1  | 399739  | Pseudomonas mendocina ymp                         |
| 0.02 | 40   | 0 G2  | 1232139 | Pseudomonas oleovorans/pseudoalcaligenes group    |
| 0.02 | 40   | 1 S   | 301     | Pseudomonas oleovorans                            |
| 0.02 | 39   | 39 S1 | 1182590 | Pseudomonas pseudoalcaligenes CECT 5344           |
| 0    | 2    | 0 G2  | 627141  | Pseudomonas nitroreducens/multiresinivorans group |
| 0    | 2    | 2 S   | 46680   | Pseudomonas nitroreducens                         |
| 0.08 | 152  | 6 G1  | 136843  | Pseudomonas fluorescens group                     |
| 0.07 | 121  | 120 S | 294     | Pseudomonas fluorescens                           |
| 0    | 1    | 1 S1  | 463794  | Pseudomonas fluorescens BBc6R8                    |
| 0    | 9    | 9 S   | 78543   | Pseudomonas migulae                               |
| 0    | 9    | 9 S   | 380021  | Pseudomonas protegens                             |
| 0    | 7    | 7 S   | 29442   | Pseudomonas tolaasii                              |
| 0.03 | 61   | 21 G1 | 196821  | unclassified Pseudomonas                          |
| 0    | 5    | 5 S   | 253237  | Pseudomonas sp. phDV1                             |
| 0    | 4    | 4 S   | 2735906 | Pseudomonas sp. B11D7D                            |
| 0    | 3    | 3 S   | 2774873 | Pseudomonas sp. ADPe                              |
| 0    | 3    | 3 S   | 2762896 | Pseudomonas sp. MPDS                              |

|      |     |       |         |                                                                      |
|------|-----|-------|---------|----------------------------------------------------------------------|
| 0    | 3   | 3 S   | 2731681 | Pseudomonas sp. S1-A32-2                                             |
| 0    | 3   | 3 S   | 2614442 | Pseudomonas sp. LPB0260                                              |
| 0    | 3   | 3 S   | 2201356 | Pseudomonas sp. 31-12                                                |
| 0    | 3   | 3 S   | 1294143 | Pseudomonas sp. ATCC 13867                                           |
| 0    | 2   | 2 S   | 2812000 | Pseudomonas sp. SDM007                                               |
| 0    | 2   | 2 S   | 2811422 | Pseudomonas sp. PDNC002                                              |
| 0    | 1   | 1 S   | 2049589 | Pseudomonas sp. HLS-6                                                |
| 0    | 1   | 1 S   | 76885   | Pseudomonas sp. K-62                                                 |
| 0    | 1   | 1 S   | 2725477 | Pseudomonas sp. TUM18999                                             |
| 0    | 1   | 1 S   | 2605424 | Pseudomonas sp. J380                                                 |
| 0    | 1   | 1 S   | 2587845 | Pseudomonas sp. THAF7b                                               |
| 0    | 1   | 1 S   | 2054919 | Pseudomonas sp. S09G 359                                             |
| 0    | 1   | 1 S   | 2025658 | Pseudomonas sp. NS1(2017)                                            |
| 0    | 1   | 1 S   | 1931241 | Pseudomonas sp. S-6-2                                                |
| 0    | 1   | 1 S   | 1898684 | Pseudomonas sp. LPH1                                                 |
| 0.02 | 35  | 0 G1  | 136845  | Pseudomonas putida group                                             |
| 0.02 | 33  | 25 S  | 303     | Pseudomonas putida                                                   |
| 0    | 6   | 6 S1  | 1211579 | Pseudomonas putida NBRC 14164                                        |
| 0    | 2   | 2 S1  | 1384061 | Pseudomonas putida S13.1.2                                           |
| 0    | 2   | 2 S   | 47885   | Pseudomonas oryzae                                                   |
| 0.01 | 19  | 0 G1  | 136846  | Pseudomonas stutzeri group                                           |
| 0.01 | 11  | 0 G2  | 578833  | Pseudomonas stutzeri subgroup                                        |
| 0.01 | 11  | 9 S   | 316     | Pseudomonas stutzeri                                                 |
| 0    | 2   | 2 S1  | 1123519 | Pseudomonas stutzeri DSM 10701                                       |
| 0    | 8   | 8 S   | 74829   | Pseudomonas balearica                                                |
| 0.01 | 11  | 0 S   | 101564  | Pseudomonas alcaliphila                                              |
| 0.01 | 11  | 11 S1 | 741155  | Pseudomonas alcaliphila JAB1                                         |
| 0.01 | 10  | 10 S  | 359110  | Pseudomonas extremaustralis                                          |
| 0    | 8   | 8 S   | 237610  | Pseudomonas psychrotolerans                                          |
| 0    | 6   | 6 S   | 65741   | Pseudomonas knackmussii                                              |
| 0    | 6   | 6 S   | 216142  | Pseudomonas rhizosphaerae                                            |
| 0    | 4   | 4 S   | 104087  | Pseudomonas frederiksbergensis                                       |
| 0    | 3   | 3 S   | 2502979 | Pseudomonas khazarica                                                |
| 0    | 3   | 3 S   | 1615674 | Pseudomonas lactis                                                   |
| 0    | 3   | 3 S   | 1499686 | Pseudomonas saudiophocaensis                                         |
| 0    | 3   | 3 S   | 237609  | Pseudomonas alkylphenolica                                           |
| 0    | 3   | 3 S   | 157782  | Pseudomonas parafulva                                                |
| 0    | 2   | 2 S   | 219572  | Pseudomonas antarctica                                               |
| 0    | 1   | 1 S   | 1691904 | Pseudomonas sediminis                                                |
| 0    | 1   | 1 S   | 395598  | Pseudomonas reinekei                                                 |
| 0    | 1   | 0 G1  | 136844  | Pseudomonas pertucinogena group                                      |
| 0    | 1   | 1 S   | 43306   | Pseudomonas denitrificans (nom. rej.)                                |
| 0.17 | 302 | 2 O   | 91347   | Enterobacteriales                                                    |
| 0.09 | 168 | 51 F  | 543     | Enterobacteriaceae                                                   |
| 0.04 | 68  | 4 G   | 561     | Escherichia                                                          |
| 0.03 | 63  | 61 S  | 562     | Escherichia coli                                                     |
| 0    | 1   | 1 S1  | 2778655 | Escherichia coli O167:H26                                            |
| 0    | 1   | 1 S1  | 2763104 | Escherichia coli O150:H6                                             |
| 0    | 1   | 1 S   | 208962  | Escherichia albertii                                                 |
| 0.02 | 33  | 22 G  | 570     | Klebsiella                                                           |
| 0.01 | 10  | 10 S  | 548     | Klebsiella aerogenes                                                 |
| 0    | 1   | 1 S   | 571     | Klebsiella oxytoca                                                   |
| 0    | 6   | 0 G   | 83654   | Leclercia                                                            |
| 0    | 5   | 5 S   | 83655   | Leclercia adecarboxylata                                             |
| 0    | 1   | 0 G1  | 2627398 | unclassified Leclercia                                               |
| 0    | 1   | 1 S   | 1920114 | Leclercia sp. LSNH1                                                  |
| 0    | 4   | 1 G   | 590     | Salmonella                                                           |
| 0    | 3   | 1 S   | 28901   | Salmonella enterica                                                  |
| 0    | 2   | 0 S1  | 59201   | Salmonella enterica subsp. enterica                                  |
| 0    | 1   | 1 S2  | 189201  | Salmonella enterica subsp. enterica serovar Cubana                   |
| 0    | 1   | 0 S2  | 598     | Salmonella enterica subsp. enterica serovar Rubislaw                 |
| 0    | 1   | 1 S3  | 938143  | Salmonella enterica subsp. enterica serovar Rubislaw str. ATCC 10717 |
| 0    | 3   | 0 G   | 544     | Citrobacter                                                          |
| 0    | 3   | 0 G1  | 1344959 | Citrobacter freundii complex                                         |
| 0    | 3   | 3 S   | 546     | Citrobacter freundii                                                 |
| 0    | 2   | 1 G   | 547     | Enterobacter                                                         |
| 0    | 1   | 1 G1  | 354276  | Enterobacter cloacae complex                                         |
| 0    | 1   | 1 G   | 160674  | Raoultella                                                           |
| 0.07 | 124 | 0 F   | 1903411 | Yersiniaceae                                                         |
| 0.07 | 120 | 56 G  | 613     | Serratia                                                             |
| 0.03 | 53  | 50 S  | 614     | Serratia liquefaciens                                                |
| 0    | 3   | 3 S1  | 1346614 | Serratia liquefaciens ATCC 27592                                     |
| 0    | 4   | 4 S   | 615     | Serratia marcescens                                                  |
| 0    | 4   | 0 G1  | 2647522 | unclassified Serratia                                                |
| 0    | 4   | 4 S   | 488142  | Serratia sp. SCBI                                                    |
| 0    | 3   | 3 S   | 2741499 | Serratia surfactantfaciens                                           |
| 0    | 4   | 0 G   | 629     | Yersinia                                                             |
| 0    | 4   | 4 S   | 2607663 | Yersinia canariae                                                    |
| 0    | 4   | 0 F   | 1903414 | Morganellaceae                                                       |
| 0    | 4   | 0 G   | 586     | Providencia                                                          |
| 0    | 4   | 4 S   | 333965  | Providencia vermicola                                                |
| 0    | 2   | 0 F   | 1903410 | Pectobacteriaceae                                                    |
| 0    | 2   | 0 G   | 204037  | Dickeya                                                              |
| 0    | 2   | 2 S   | 204042  | Dickeya zeae                                                         |
| 0    | 1   | 0 O1  | 451511  | Enterobacteriales incertae sedis                                     |
| 0    | 1   | 0 G   | 702     | Plesiomonas                                                          |
| 0    | 1   | 1 S   | 703     | Plesiomonas shigelloides                                             |
| 0    | 1   | 0 F   | 1903409 | Erwiniaceae                                                          |
| 0    | 1   | 0 G   | 53335   | Pantoea                                                              |
| 0    | 1   | 1 S   | 66269   | Pantoea stewartii                                                    |
| 0.04 | 66  | 0 O   | 135624  | Aeromonadales                                                        |
| 0.04 | 66  | 0 F   | 84642   | Aeromonadaceae                                                       |
| 0.04 | 66  | 30 G  | 642     | Aeromonas                                                            |
| 0.01 | 13  | 13 S  | 644     | Aeromonas hydrophila                                                 |
| 0    | 8   | 8 S   | 651     | Aeromonas media                                                      |
| 0    | 7   | 7 S   | 648     | Aeromonas caviae                                                     |
| 0    | 4   | 4 S   | 218936  | Aeromonas simiae                                                     |
| 0    | 2   | 2 S   | 73010   | Aeromonas encheleia                                                  |
| 0    | 1   | 1 S   | 654     | Aeromonas veronii                                                    |
| 0    | 1   | 0 G1  | 257493  | unclassified Aeromonas                                               |
| 0    | 1   | 1 S   | 2675707 | Aeromonas sp. WP2-W18-CRE-05                                         |
| 0.03 | 59  | 0 O   | 135625  | Pasteurellales                                                       |
| 0.03 | 59  | 0 F   | 712     | Pasteurellaceae                                                      |
| 0.03 | 58  | 0 G   | 724     | Haemophilus                                                          |

|      |    |      |         |                                         |
|------|----|------|---------|-----------------------------------------|
| 0.03 | 48 | 41 S | 729     | Haemophilus parainfluenzae              |
| 0    | 7  | 7 S1 | 862965  | Haemophilus parainfluenzae T3T1         |
| 0    | 7  | 7 S  | 726     | Haemophilus haemolyticus                |
| 0    | 3  | 3 S  | 730     | [Haemophilus] ducreyi                   |
| 0    | 1  | 0 G  | 416916  | Aggregatibacter                         |
| 0    | 1  | 1 S  | 739     | Aggregatibacter segnis                  |
| 0.02 | 35 | 0 O  | 135619  | Oceanospirillales                       |
| 0.01 | 19 | 0 F  | 224372  | Alcanivoracaceae                        |
| 0.01 | 19 | 0 G  | 59753   | Alcanivorax                             |
| 0.01 | 10 | 10 S | 1094342 | Alcanivorax xenomutans                  |
| 0    | 6  | 0 S  | 285091  | Alcanivorax dieselolei                  |
| 0    | 6  | 6 S1 | 930169  | Alcanivorax dieselolei B5               |
| 0    | 3  | 0 S  | 1306787 | Alcanivorax pacificus                   |
| 0    | 3  | 3 S1 | 391936  | Alcanivorax pacificus W11-5             |
| 0.01 | 16 | 5 F  | 28256   | Halomonadaceae                          |
| 0    | 9  | 0 G  | 2745    | Halomonas                               |
| 0    | 9  | 5 G1 | 2609666 | unclassified Halomonas                  |
| 0    | 3  | 3 S  | 2733487 | Halomonas sp. MCCC 1A13316              |
| 0    | 1  | 1 S  | 2733488 | Halomonas sp. MCCC 1A13718              |
| 0    | 1  | 0 G  | 42054   | Chromohalobacter                        |
| 0    | 1  | 0 S  | 158080  | Chromohalobacter salexigens             |
| 0    | 1  | 1 S1 | 290398  | Chromohalobacter salexigens DSM 3043    |
| 0    | 1  | 0 G  | 204286  | Cobetia                                 |
| 0    | 1  | 0 G1 | 2609414 | unclassified Cobetia                    |
| 0    | 1  | 1 S  | 2686360 | Cobetia sp. L2A1                        |
| 0.01 | 24 | 0 O  | 135613  | Chromatiales                            |
| 0.01 | 13 | 0 F  | 1046    | Chromatiaceae                           |
| 0.01 | 13 | 0 G  | 67575   | Rheinheimera                            |
| 0.01 | 13 | 0 G1 | 115860  | unclassified Rheinheimera               |
| 0.01 | 10 | 10 S | 2498451 | Rheinheimera sp. LHK132                 |
| 0    | 3  | 3 S  | 1763998 | Rheinheimera sp. F8                     |
| 0    | 9  | 0 F  | 1096778 | Thioalkalspiraceae                      |
| 0    | 9  | 0 G  | 2034504 | Sulfurivermis                           |
| 0    | 9  | 9 S  | 1972068 | Sulfurivermis fontis                    |
| 0    | 2  | 0 F  | 72276   | Ectothiorhodospiraceae                  |
| 0    | 2  | 0 G  | 106633  | Thioalkalivibrio                        |
| 0    | 2  | 0 S  | 1033854 | Thioalkalivibrio sulfidiphilus          |
| 0    | 2  | 2 S1 | 396588  | Thioalkalivibrio sulfidiphilus HL-EbGr7 |
| 0.01 | 17 | 0 O  | 135622  | Alteromonadales                         |
| 0    | 9  | 0 F  | 267888  | Pseudoalteromonadaceae                  |
| 0    | 6  | 3 G  | 53246   | Pseudoalteromonas                       |
| 0    | 2  | 2 S  | 166935  | Pseudoalteromonas translucida           |
| 0    | 1  | 1 S  | 874454  | Pseudoalteromonas arabiensis            |
| 0    | 3  | 0 G  | 907197  | Psychrosphaera                          |
| 0    | 3  | 3 S  | 1266052 | Psychrosphaera aestuarii                |
| 0    | 6  | 0 F  | 267890  | Shewanellaceae                          |
| 0    | 6  | 0 G  | 22      | Shewanella                              |
| 0    | 4  | 0 G1 | 196818  | unclassified Shewanella                 |
| 0    | 4  | 4 S  | 94122   | Shewanella sp. ANA-3                    |
| 0    | 2  | 0 S  | 271098  | Shewanella halifaxensis                 |
| 0    | 2  | 2 S1 | 458817  | Shewanella halifaxensis HAW-EB4         |
| 0    | 2  | 0 F  | 72275   | Alteromonadaceae                        |
| 0    | 2  | 0 G  | 2742    | Marinobacter                            |
| 0    | 2  | 2 S  | 418719  | Marinobacter saluginis                  |
| 0    | 9  | 0 O  | 72273   | Thiotrichales                           |
| 0    | 7  | 0 F  | 135616  | Piscirickettsiaceae                     |
| 0    | 7  | 0 G  | 28884   | Hydrogenovibrio                         |
| 0    | 7  | 7 S  | 28885   | Hydrogenovibrio marinus                 |
| 0    | 2  | 0 F  | 135617  | Thiotrichaceae                          |
| 0    | 2  | 0 G  | 1030    | Thiothrix                               |
| 0    | 2  | 0 G1 | 2636184 | unclassified Thiothrix                  |
| 0    | 2  | 2 S  | 1032    | Thiothrix sp.                           |
| 0    | 9  | 0 O  | 135615  | Cardiobacteriales                       |
| 0    | 9  | 0 F  | 868     | Cardiobacteriaceae                      |
| 0    | 9  | 0 G  | 2717    | Cardiobacterium                         |
| 0    | 9  | 9 S  | 2718    | Cardiobacterium hominis                 |
| 0    | 6  | 0 O  | 1706369 | Cellvibrionales                         |
| 0    | 3  | 0 F  | 1706371 | Cellvibrionaceae                        |
| 0    | 3  | 0 G  | 10      | Cellvibrio                              |
| 0    | 3  | 0 G1 | 2624793 | unclassified Cellvibrio                 |
| 0    | 3  | 3 S  | 454662  | Cellvibrio sp. KY-YJ-3                  |
| 0    | 3  | 0 F  | 1706373 | Microbulbiferaceae                      |
| 0    | 3  | 0 G  | 48073   | Microbulbifer                           |
| 0    | 3  | 0 G1 | 2619833 | unclassified Microbulbifer              |
| 0    | 3  | 3 S  | 2745199 | Microbulbifer sp. YPW1                  |
| 0    | 4  | 0 O  | 1934945 | Immundisolibacterales                   |
| 0    | 4  | 0 F  | 1934946 | Immundisolibacteraceae                  |
| 0    | 4  | 0 G  | 1934947 | Immundisolibacter                       |
| 0    | 4  | 4 S  | 1810504 | Immundisolibacter cernigliae            |
| 0    | 2  | 0 O  | 135618  | Methylococcales                         |
| 0    | 2  | 0 F  | 403     | Methylococcaceae                        |
| 0    | 2  | 0 G  | 416     | Methylomonas                            |
| 0    | 2  | 0 S  | 421     | Methylomonas methanica                  |
| 0    | 2  | 2 S1 | 857087  | Methylomonas methanica MC09             |
| 0    | 2  | 0 O  | 135623  | Vibrionales                             |
| 0    | 2  | 0 F  | 641     | Vibrionaceae                            |
| 0    | 2  | 0 G  | 662     | Vibrio                                  |
| 0    | 1  | 1 S  | 666     | Vibrio cholerae                         |
| 0    | 1  | 0 G1 | 717610  | Vibrio harveyi group                    |
| 0    | 1  | 1 S  | 663     | Vibrio alginolyticus                    |
| 0    | 1  | 0 O  | 1775403 | Nevskiales                              |
| 0    | 1  | 0 F  | 568386  | Sinobacteraceae                         |
| 0    | 1  | 0 G  | 1861863 | Sinimariniibacterium                    |
| 0    | 1  | 0 G1 | 2621506 | unclassified Sinimariniibacterium       |
| 0    | 1  | 1 S  | 2698684 | Sinimariniibacterium sp. NLF-5-8        |
| 0.02 | 28 | 0 P1 | 68525   | delta/epsilon subdivisions              |
| 0.01 | 15 | 0 C  | 28221   | Deltaproteobacteria                     |
| 0.01 | 14 | 0 O  | 29      | Myxococcales                            |
| 0.01 | 10 | 0 O1 | 80812   | Sorangineae                             |
| 0    | 8  | 0 F  | 1524216 | Labilithricaceae                        |
| 0    | 8  | 0 G  | 1524217 | Labilithrix                             |
| 0    | 8  | 8 S  | 1391654 | Labilithrix luteola                     |
| 0    | 2  | 0 F  | 49      | Polyangiaceae                           |
| 0    | 2  | 0 G  | 39643   | Sorangium                               |

|      |       |        |         |                                                   |
|------|-------|--------|---------|---------------------------------------------------|
| 0    | 2     | 1 S    | 56      | Sorangium cellulosum                              |
| 0    | 1     | 1 S1   | 1254432 | Sorangium cellulosum So0157-2                     |
| 0    | 2     | 0 O1   | 80811   | Cystobacterineae                                  |
| 0    | 2     | 0 F    | 31      | Myxococcaceae                                     |
| 0    | 2     | 0 G    | 32      | Myxococcus                                        |
| 0    | 2     | 2 S    | 34      | Myxococcus xanthus                                |
| 0    | 2     | 0 O1   | 224462  | Nannocystineae                                    |
| 0    | 2     | 0 F    | 224464  | Kofleriaceae                                      |
| 0    | 2     | 0 G    | 162027  | Haliangium                                        |
| 0    | 2     | 0 S    | 80816   | Haliangium ochraceum                              |
| 0    | 2     | 2 S1   | 502025  | Haliangium ochraceum DSM 14365                    |
| 0    | 1     | 0 O    | 213115  | Desulfovibrionales                                |
| 0    | 1     | 0 F    | 194924  | Desulfovibrionaceae                               |
| 0    | 1     | 0 G    | 2773294 | Desulfotulivibrio                                 |
| 0    | 1     | 1 S    | 2773299 | Desulfotulivibrio sulfoxidireducens               |
| 0.01 | 13    | 0 C    | 29547   | Epsilonproteobacteria                             |
| 0.01 | 13    | 0 O    | 213849  | Campylobacterales                                 |
| 0.01 | 13    | 0 F    | 72294   | Campylobacteraceae                                |
| 0.01 | 13    | 2 G    | 194     | Campylobacter                                     |
| 0.01 | 11    | 10 S   | 195     | Campylobacter coli                                |
| 0    | 1     | 1 S1   | 1367491 | Campylobacter coli 76339                          |
| 0.01 | 11    | 0 C    | 2008785 | Hydrogenophilalia                                 |
| 0.01 | 11    | 0 O    | 119069  | Hydrogenophilales                                 |
| 0.01 | 11    | 0 F    | 206349  | Hydrogenophilaceae                                |
| 0.01 | 11    | 0 G    | 70774   | Hydrogenophilus                                   |
| 0.01 | 11    | 11 S   | 297     | Hydrogenophilus thermoluteolus                    |
| 0    | 7     | 0 C    | 1553900 | Oligoflexia                                       |
| 0    | 7     | 0 O    | 213481  | Bdellovibrionales                                 |
| 0    | 7     | 0 F    | 213483  | Bdellovibrionaceae                                |
| 0    | 7     | 0 G    | 958     | Bdellovibrio                                      |
| 0    | 5     | 0 S    | 959     | Bdellovibrio bacteriovorus                        |
| 0    | 5     | 5 S1   | 765869  | Bdellovibrio bacteriovorus W                      |
| 0    | 2     | 0 G1   | 2633795 | unclassified Bdellovibrio                         |
| 0    | 2     | 2 S    | 2231053 | Bdellovibrio sp. ZAP7                             |
| 9.57 | 17233 | 29 D1  | 1783272 | Terrabacteria group                               |
| 7.72 | 13900 | 2 P    | 201174  | Actinobacteria                                    |
| 7.69 | 13850 | 191 C  | 1760    | Actinomycetia                                     |
| 5.72 | 10299 | 5 O    | 85009   | Propionibacteriales                               |
| 5.69 | 10254 | 105 F  | 31957   | Propionibacteriaceae                              |
| 5.56 | 10008 | 72 G   | 1912216 | Cutibacterium                                     |
| 5.44 | 9805  | 9781 S | 1747    | Cutibacterium acnes                               |
| 0.01 | 14    | 1 S1   | 1734925 | Cutibacterium acnes subsp. acnes                  |
| 0.01 | 11    | 11 S2  | 1114967 | Cutibacterium acnes TypeA2 P.acn17                |
| 0    | 2     | 2 S2   | 1114966 | Cutibacterium acnes TypeA2 P.acn33                |
| 0    | 7     | 7 S1   | 1134454 | Cutibacterium acnes HL096PA1                      |
| 0    | 2     | 2 S1   | 1234380 | Cutibacterium acnes C1                            |
| 0    | 1     | 0 S1   | 1905725 | Cutibacterium acnes subsp. defensens              |
| 0    | 1     | 1 S2   | 1091045 | Cutibacterium acnes subsp. defensens ATCC 11828   |
| 0.07 | 121   | 121 S  | 33011   | Cutibacterium granulosum                          |
| 0.01 | 10    | 9 S    | 33010   | Cutibacterium avidum                              |
| 0    | 1     | 1 S1   | 1170318 | Cutibacterium avidum 44067                        |
| 0.05 | 96    | 0 G    | 1743    | Propionibacterium                                 |
| 0.03 | 49    | 0 G1   | 2608905 | unclassified Propionibacterium                    |
| 0.03 | 49    | 49 S   | 671223  | Propionibacterium sp. oral taxon 193              |
| 0.02 | 43    | 17 S   | 1744    | Propionibacterium freudenreichii                  |
| 0.01 | 26    | 26 S1  | 1752    | Propionibacterium freudenreichii subsp. shermanii |
| 0    | 4     | 4 S    | 556499  | Propionibacterium acidifaciens                    |
| 0.01 | 18    | 0 G    | 72763   | Tessaracoccus                                     |
| 0.01 | 14    | 14 S   | 399497  | Tessaracoccus flavescens                          |
| 0    | 3     | 3 S    | 1285901 | Tessaracoccus defluvi                             |
| 0    | 1     | 1 S    | 1332264 | Tessaracoccus aquimaris                           |
| 0.01 | 14    | 0 G    | 1912215 | Acidipropionibacterium                            |
| 0.01 | 13    | 13 S   | 1749    | Acidipropionibacterium jensenii                   |
| 0    | 1     | 1 S    | 2057246 | Acidipropionibacterium virtanenii                 |
| 0.01 | 10    | 0 G    | 29404   | Microlunatus                                      |
| 0    | 5     | 0 S    | 29405   | Microlunatus phosphovor                           |
| 0    | 5     | 5 S1   | 1032480 | Microlunatus phosphovor                           |
| 0    | 5     | 5 S    | 546874  | Microlunatus sagamiharensis                       |
| 0    | 3     | 0 G    | 1085622 | Propioniciclava                                   |
| 0    | 3     | 0 G1   | 2642922 | unclassified Propioniciclava                      |
| 0    | 3     | 3 S    | 2714937 | Propioniciclava sp. HDW11                         |
| 0.02 | 40    | 1 F    | 85015   | Nocardioideae                                     |
| 0.01 | 22    | 7 G    | 1839    | Nocardioideae                                     |
| 0    | 7     | 0 G1   | 2615069 | unclassified Nocardioideae                        |
| 0    | 4     | 4 S    | 2736757 | Nocardioideae sp. MC1495                          |
| 0    | 1     | 1 S    | 2017486 | Nocardioideae sp. S5                              |
| 0    | 1     | 1 S    | 2663857 | Nocardioideae sp. zg-579                          |
| 0    | 1     | 1 S    | 2760089 | Nocardioideae sp. S-713                           |
| 0    | 4     | 4 S    | 200618  | Nocardioideae aromaticivorans                     |
| 0    | 2     | 2 S    | 402297  | Nocardioideae daphniae                            |
| 0    | 1     | 1 S    | 449461  | Nocardioideae humi                                |
| 0    | 1     | 1 S    | 2712223 | Nocardioideae anomalus                            |
| 0.01 | 10    | 1 G    | 2040    | Aeromicrobium                                     |
| 0    | 3     | 0 S    | 219314  | Aeromicrobium marinum                             |
| 0    | 3     | 3 S1   | 585531  | Aeromicrobium marinum DSM 15272                   |
| 0    | 3     | 3 S    | 1736691 | Aeromicrobium choanae                             |
| 0    | 2     | 0 G1   | 2633570 | unclassified Aeromicrobium                        |
| 0    | 2     | 2 S    | 2663859 | Aeromicrobium sp. zg-629                          |
| 0    | 1     | 1 S    | 2041    | Aeromicrobium erythreum                           |
| 0    | 7     | 0 G    | 116071  | Micropruina                                       |
| 0    | 7     | 7 S    | 75385   | Micropruina glycogenica                           |
| 1.33 | 2389  | 68 O   | 85006   | Micrococcales                                     |
| 1.1  | 1989  | 151 F  | 85023   | Microbacteriaceae                                 |
| 0.85 | 1540  | 438 G  | 33882   | Microbacterium                                    |
| 0.24 | 428   | 59 G1  | 2609290 | unclassified Microbacterium                       |
| 0.02 | 40    | 40 S   | 2483401 | Microbacterium sp. 10M-3C3                        |
| 0.02 | 37    | 37 S   | 2014534 | Microbacterium sp. PM5                            |
| 0.01 | 27    | 27 S   | 2567934 | Microbacterium sp. 4R-513                         |
| 0.01 | 25    | 25 S   | 367477  | Microbacterium sp. XT11                           |
| 0.01 | 25    | 25 S   | 2603598 | Microbacterium sp. CBA3102                        |
| 0.01 | 25    | 25 S   | 2782167 | Microbacterium sp. A18JL200                       |
| 0.01 | 24    | 24 S   | 1714373 | Microbacterium sp. No. 7                          |
| 0.01 | 24    | 24 S   | 2268461 | Microbacterium sp. ABRD_28                        |
| 0.01 | 22    | 22 S   | 2782169 | Microbacterium sp. NY27                           |

|      |     |       |         |                                                  |
|------|-----|-------|---------|--------------------------------------------------|
| 0.01 | 20  | 20 S  | 2782166 | Microbacterium sp. A18JL241                      |
| 0.01 | 14  | 14 S  | 1795053 | Microbacterium sp. PAMC 28756                    |
| 0.01 | 14  | 14 S  | 2763257 | Microbacterium sp. YIN-G                         |
| 0.01 | 12  | 12 S  | 1906742 | Microbacterium sp. BH-3-3-3                      |
| 0.01 | 11  | 11 S  | 2782168 | Microbacterium sp. WY121                         |
| 0.01 | 10  | 10 S  | 2489212 | Microbacterium sp. RG1                           |
| 0    | 8   | 8 S   | 1906274 | Microbacterium sp. J231                          |
| 0    | 7   | 7 S   | 2103230 | Microbacterium sp. str. 'China'                  |
| 0    | 6   | 6 S   | 1938334 | Microbacterium sp. TPU 3598                      |
| 0    | 5   | 5 S   | 912630  | Microbacterium sp. LKL04                         |
| 0    | 5   | 5 S   | 2766784 | Microbacterium sp. Nx66                          |
| 0    | 4   | 4 S   | 2048898 | Microbacterium sp. Y-01                          |
| 0    | 2   | 2 S   | 1916917 | Microbacterium sp. 1.5R                          |
| 0    | 1   | 1 S   | 2606451 | Microbacterium sp. 1S1                           |
| 0    | 1   | 1 S   | 2709304 | Microbacterium sp. Se63.02b                      |
| 0.13 | 240 | 240 S | 36805   | Microbacterium aurum                             |
| 0.08 | 138 | 138 S | 162426  | Microbacterium hominis                           |
| 0.03 | 63  | 63 S  | 199592  | Microbacterium paraoxydans                       |
| 0.02 | 42  | 42 S  | 1072463 | Microbacterium lemovicicum                       |
| 0.02 | 33  | 33 S  | 104336  | Microbacterium foliorum                          |
| 0.02 | 30  | 30 S  | 273677  | Microbacterium oleivorans                        |
| 0.01 | 21  | 21 S  | 82380   | Microbacterium oxydans                           |
| 0.01 | 21  | 21 S  | 2541726 | Microbacterium wangchenii                        |
| 0.01 | 18  | 18 S  | 84292   | Microbacterium chokolatum                        |
| 0.01 | 16  | 16 S  | 370764  | Microbacterium pygmaeum                          |
| 0.01 | 11  | 11 S  | 2614638 | Microbacterium caowuchunii                       |
| 0.01 | 10  | 10 S  | 904291  | Microbacterium sediminis                         |
| 0    | 7   | 7 S   | 69362   | Microbacterium schleiferi                        |
| 0    | 7   | 7 S   | 743009  | Microbacterium oryzae                            |
| 0    | 5   | 5 S   | 2614639 | Microbacterium lushaniae                         |
| 0    | 4   | 4 S   | 273678  | Microbacterium hydrocarbonoxydans                |
| 0    | 3   | 3 S   | 2509458 | Microbacterium protaetiae                        |
| 0    | 2   | 2 S   | 57043   | Microbacterium esteraromaticum                   |
| 0    | 2   | 2 S   | 1526412 | Microbacterium endophyticum                      |
| 0    | 1   | 0 S   | 2033    | Microbacterium testaceum                         |
| 0    | 1   | 1 S1  | 979556  | Microbacterium testaceum StLB037                 |
| 0.05 | 98  | 2 G   | 2034    | Curtobacterium                                   |
| 0.03 | 60  | 0 S   | 2035    | Curtobacterium flaccumfaciens                    |
| 0.03 | 60  | 60 S1 | 138532  | Curtobacterium flaccumfaciens pv. flaccumfaciens |
| 0.02 | 36  | 3 G1  | 257496  | unclassified Curtobacterium                      |
| 0.01 | 16  | 16 S  | 1561023 | Curtobacterium sp. MR_MD2014                     |
| 0.01 | 10  | 10 S  | 2070337 | Curtobacterium sp. SGAir0471                     |
| 0    | 3   | 3 S   | 2495430 | Curtobacterium sp. Csp2                          |
| 0    | 2   | 2 S   | 1905847 | Curtobacterium sp. BH-2-1-1                      |
| 0    | 1   | 1 S   | 2795488 | Curtobacterium sp. YC1                           |
| 0    | 1   | 1 S   | 2804758 | Curtobacterium sp. 24E2                          |
| 0.02 | 40  | 0 G   | 33877   | Agromyces                                        |
| 0.02 | 34  | 0 G1  | 2639701 | unclassified Agromyces                           |
| 0.01 | 16  | 16 S  | 2592652 | Agromyces sp. KACC 19306                         |
| 0    | 9   | 9 S   | 2498704 | Agromyces sp. LHK192                             |
| 0    | 5   | 5 S   | 2781962 | Agromyces sp. G127AT                             |
| 0    | 4   | 4 S   | 2585717 | Agromyces sp. HY052                              |
| 0    | 3   | 3 S   | 589382  | Agromyces flavus                                 |
| 0    | 2   | 2 S   | 2509455 | Agromyces protaetiae                             |
| 0    | 1   | 1 S   | 2080742 | Agromyces badenianii                             |
| 0.02 | 30  | 0 G   | 33886   | Rathayibacter                                    |
| 0.01 | 21  | 2 G1  | 2609250 | unclassified Rathayibacter                       |
| 0.01 | 16  | 16 S  | 2609253 | Rathayibacter sp. VKM Ac-2760                    |
| 0    | 2   | 2 S   | 2609257 | Rathayibacter sp. VKM Ac-2804                    |
| 0    | 1   | 1 S   | 2609254 | Rathayibacter sp. VKM Ac-2762                    |
| 0    | 8   | 8 S   | 59737   | Rathayibacter iranicus                           |
| 0    | 1   | 1 S   | 1671680 | Rathayibacter tanacetii                          |
| 0.01 | 27  | 0 G   | 55968   | Leucobacter                                      |
| 0.01 | 16  | 16 S  | 1784719 | Leucobacter triazinivorans                       |
| 0.01 | 11  | 11 S  | 1935379 | Leucobacter muris                                |
| 0.01 | 20  | 0 G   | 110932  | Leifsonia                                        |
| 0.01 | 12  | 4 G1  | 2663824 | unclassified Leifsonia                           |
| 0    | 4   | 4 S   | 1798223 | Leifsonia sp. 21MFCrub1.1                        |
| 0    | 4   | 4 S   | 2724914 | Leifsonia sp. PS1209                             |
| 0    | 8   | 8 S   | 150026  | Leifsonia shinshuensis                           |
| 0.01 | 14  | 0 G   | 1573    | Clavibacter                                      |
| 0.01 | 11  | 0 S   | 28447   | Clavibacter michiganensis                        |
| 0    | 6   | 6 S1  | 31963   | Clavibacter michiganensis subsp. nebraskensis    |
| 0    | 3   | 3 S1  | 33013   | Clavibacter michiganensis subsp. michiganensis   |
| 0    | 2   | 2 S1  | 1874630 | Clavibacter michiganensis subsp. capsici         |
| 0    | 3   | 0 G1  | 2626594 | unclassified Clavibacter                         |
| 0    | 3   | 3 S   | 2768071 | Clavibacter sp. DM1                              |
| 0.01 | 12  | 0 G   | 1433997 | Diaminobutyricimonas                             |
| 0.01 | 12  | 0 G1  | 2643261 | unclassified Diaminobutyricimonas                |
| 0.01 | 12  | 12 S  | 2683590 | Diaminobutyricimonas sp. LJ205                   |
| 0    | 9   | 0 G   | 235888  | Salinibacterium                                  |
| 0    | 9   | 0 G1  | 2632331 | unclassified Salinibacterium                     |
| 0    | 4   | 4 S   | 2708338 | Salinibacterium sp. ZJ450                        |
| 0    | 3   | 3 S   | 2603292 | Salinibacterium sp. dk2585                       |
| 0    | 2   | 2 S   | 2708084 | Salinibacterium sp. ZJ70                         |
| 0    | 7   | 0 G   | 76634   | Mycetocola                                       |
| 0    | 6   | 0 G1  | 2685235 | unclassified Mycetocola                          |
| 0    | 6   | 6 S   | 2116510 | Mycetocola sp. JXN-3                             |
| 0    | 1   | 1 S   | 2079792 | Mycetocola zhujimingii                           |
| 0    | 7   | 0 G   | 190323  | Plantibacter                                     |
| 0    | 6   | 6 S   | 150123  | Plantibacter flavus                              |
| 0    | 1   | 1 G1  | 2624265 | unclassified Plantibacter                        |
| 0    | 6   | 0 G   | 1195526 | Gryllotalpicola                                  |
| 0    | 6   | 6 S   | 2419771 | Gryllotalpicola protaetiae                       |
| 0    | 5   | 0 G   | 69578   | Cryobacterium                                    |
| 0    | 3   | 0 G1  | 2649013 | unclassified Cryobacterium                       |
| 0    | 3   | 3 S   | 1978566 | Cryobacterium sp. LW097                          |
| 0    | 2   | 2 S   | 670052  | Cryobacterium arcticum                           |
| 0    | 5   | 0 G   | 881616  | Herbiconiux                                      |
| 0    | 5   | 0 G1  | 2618217 | unclassified Herbiconiux                         |
| 0    | 5   | 5 S   | 2735133 | Herbiconiux sp. SALV-R1                          |
| 0    | 4   | 0 G   | 337004  | Microcella                                       |
| 0    | 4   | 4 S   | 279828  | Microcella alkaliphila                           |
| 0    | 3   | 0 G   | 46352   | Agrococcus                                       |

|      |     |       |         |                                  |
|------|-----|-------|---------|----------------------------------|
| 0    | 2   | 2 S   | 399736  | Agrococcus jejuensis             |
| 0    | 1   | 0 G1  | 2615065 | unclassified Agrococcus          |
| 0    | 1   | 1 S   | 2070347 | Agrococcus sp. SGAir0287         |
| 0    | 3   | 0 G   | 96492   | Frigoribacterium                 |
| 0    | 3   | 0 G1  | 2627005 | unclassified Frigoribacterium    |
| 0    | 3   | 3 S   | 2596916 | Frigoribacterium sp. NBH87       |
| 0    | 3   | 0 G   | 447237  | Fron dih abitans                 |
| 0    | 3   | 0 G1  | 2626248 | unclassified Fron dih abitans    |
| 0    | 3   | 3 S   | 1795630 | Fron dih abitans sp. PAMC 28766  |
| 0    | 3   | 0 G   | 1331730 | Chryseoglobus                    |
| 0    | 3   | 3 S   | 2750620 | Chryseoglobus indicus            |
| 0    | 2   | 0 G   | 110934  | Agreia                           |
| 0    | 2   | 0 G1  | 2641148 | unclassified Agreia              |
| 0    | 2   | 2 S   | 2773266 | Agreia sp. COWG                  |
| 0.09 | 171 | 38 F  | 1268    | Micrococcaceae                   |
| 0.02 | 44  | 9 G   | 1269    | Micrococcus                      |
| 0.02 | 34  | 34 S  | 1270    | Micrococcus luteus               |
| 0    | 1   | 0 G1  | 2620948 | unclassified Micrococcus         |
| 0    | 1   | 1 S   | 376418  | Micrococcus sp. A7               |
| 0.02 | 28  | 0 G   | 32207   | Rothia                           |
| 0.01 | 15  | 1 S   | 2047    | Rothia dentocariosa              |
| 0.01 | 14  | 14 S1 | 762948  | Rothia dentocariosa ATCC 17931   |
| 0    | 8   | 8 S   | 37923   | Rothia kristinae                 |
| 0    | 4   | 4 S   | 43675   | Rothia mucilaginosa              |
| 0    | 1   | 1 S   | 169480  | Rothia amarae                    |
| 0.01 | 25  | 1 G   | 57493   | Kocuria                          |
| 0    | 9   | 9 S   | 71999   | Kocuria palustris                |
| 0    | 8   | 8 S   | 1272    | Kocuria varians                  |
| 0    | 7   | 7 S   | 72000   | Kocuria rhizophila               |
| 0.01 | 12  | 0 G   | 1742989 | Glutamicibacter                  |
| 0.01 | 12  | 12 S  | 37929   | Glutamicibacter nicotianae       |
| 0.01 | 11  | 0 G   | 1663    | Arthrobacter                     |
| 0    | 9   | 0 G1  | 235627  | unclassified Arthrobacter        |
| 0    | 6   | 6 S   | 1357915 | Arthrobacter sp. QXT-31          |
| 0    | 3   | 3 S   | 904039  | Arthrobacter sp. NEB 688         |
| 0    | 2   | 2 S   | 37921   | Arthrobacter agilis              |
| 0    | 8   | 0 G   | 370735  | Zhihengliuella                   |
| 0    | 8   | 0 G1  | 2626589 | unclassified Zhihengliuella      |
| 0    | 8   | 8 S   | 2058657 | Zhihengliuella sp. ISTPL4        |
| 0    | 4   | 0 G   | 1645    | Renibacterium                    |
| 0    | 4   | 4 S   | 1646    | Renibacterium salmoninarum       |
| 0    | 1   | 0 G   | 1742993 | Pseudarthrobacter                |
| 0    | 1   | 1 S   | 121292  | Pseudarthrobacter sulfonivorans  |
| 0.03 | 58  | 0 F   | 85019   | Brevibacteriaceae                |
| 0.03 | 58  | 1 G   | 1696    | Brevibacterium                   |
| 0.02 | 30  | 0 G1  | 2614124 | unclassified Brevibacterium      |
| 0.01 | 12  | 12 S  | 1496080 | Brevibacterium sp. YB235         |
| 0.01 | 12  | 12 S  | 2575923 | Brevibacterium sp. CS2           |
| 0    | 6   | 6 S   | 1406197 | Brevibacterium sp. Ap13          |
| 0.01 | 14  | 14 S  | 273384  | Brevibacterium aurantiacum       |
| 0    | 8   | 8 S   | 1703    | Brevibacterium linens            |
| 0    | 5   | 5 S   | 629680  | Brevibacterium sandarakinum      |
| 0.02 | 38  | 0 F   | 85021   | Intrasporangiaceae               |
| 0.02 | 37  | 10 G  | 53457   | Janibacter                       |
| 0.01 | 13  | 13 S  | 857417  | Janibacter indicus               |
| 0.01 | 10  | 10 S  | 53458   | Janibacter limosus               |
| 0    | 3   | 3 S   | 262209  | Janibacter melonis               |
| 0    | 1   | 0 G1  | 2649294 | unclassified Janibacter          |
| 0    | 1   | 1 S   | 2761047 | Janibacter sp. YB324             |
| 0    | 1   | 0 G   | 367298  | Phycococcus                      |
| 0    | 1   | 0 G1  | 2637926 | unclassified Phycococcus         |
| 0    | 1   | 1 S   | 2714941 | Phycococcus sp. HDW14            |
| 0.01 | 21  | 0 F   | 85016   | Cellulomonadaceae                |
| 0.01 | 20  | 0 G   | 1707    | Cellulomonas                     |
| 0    | 9   | 0 S   | 1711    | Cellulomonas flavigena           |
| 0    | 9   | 9 S1  | 446466  | Cellulomonas flavigena DSM 20109 |
| 0    | 7   | 0 G1  | 2620175 | unclassified Cellulomonas        |
| 0    | 5   | 5 S   | 2654191 | Cellulomonas sp. JZ18            |
| 0    | 2   | 2 S   | 2704467 | Cellulomonas sp. H30R-01         |
| 0    | 4   | 4 S   | 2729175 | Cellulomonas taurus              |
| 0    | 1   | 0 G   | 162491  | Oerskovia                        |
| 0    | 1   | 0 G1  | 2619021 | unclassified Oerskovia           |
| 0    | 1   | 1 S   | 1179673 | Oerskovia sp. KBS0722            |
| 0.01 | 17  | 0 F   | 2805426 | Kytococcaceae                    |
| 0.01 | 17  | 0 G   | 57499   | Kytococcus                       |
| 0.01 | 17  | 17 S  | 1276    | Kytococcus sedentarius           |
| 0.01 | 10  | 0 F   | 85017   | Promicromonosporaceae            |
| 0    | 7   | 0 G   | 157920  | Cellulosimicrobium               |
| 0    | 5   | 5 S   | 1710    | Cellulosimicrobium cellulans     |
| 0    | 2   | 0 G1  | 2624466 | unclassified Cellulosimicrobium  |
| 0    | 1   | 1 S   | 1906273 | Cellulosimicrobium sp. JZ28      |
| 0    | 1   | 1 S   | 2731680 | Cellulosimicrobium sp. 72-3      |
| 0    | 3   | 0 G   | 186188  | Xylanimonas                      |
| 0    | 3   | 3 S   | 2509459 | Xylanimonas allomyrinae          |
| 0    | 9   | 0 F   | 85020   | Dermabacteraceae                 |
| 0    | 8   | 0 G   | 43668   | Brachybacterium                  |
| 0    | 4   | 0 S   | 43669   | Brachybacterium faecium          |
| 0    | 4   | 4 S1  | 446465  | Brachybacterium faecium DSM 4810 |
| 0    | 4   | 4 S   | 1331682 | Brachybacterium ginsengisoli     |
| 0    | 1   | 0 G   | 36739   | Dermabacter                      |
| 0    | 1   | 1 S   | 1630135 | Dermabacter vaginalis            |
| 0    | 3   | 0 F   | 145357  | Dermacoccaceae                   |
| 0    | 3   | 0 G   | 57495   | Dermacoccus                      |
| 0    | 3   | 3 S   | 1274    | Dermacoccus nishinomiyaensis     |
| 0    | 2   | 0 F   | 145358  | Bogoriellaceae                   |
| 0    | 2   | 0 G   | 154116  | Georgenia                        |
| 0    | 1   | 1 S   | 2483799 | Georgenia faecalis               |
| 0    | 1   | 0 G1  | 2626815 | unclassified Georgenia           |
| 0    | 1   | 1 S   | 2589797 | Georgenia sp. Z443               |
| 0    | 2   | 0 F   | 145360  | Sanguibacteraceae                |
| 0    | 2   | 0 G   | 60919   | Sanguibacter                     |
| 0    | 2   | 0 S   | 60920   | Sanguibacter keddiei             |
| 0    | 2   | 2 S1  | 446469  | Sanguibacter keddiei DSM 10542   |
| 0    | 1   | 0 F   | 2805590 | Ornithinimicrobiaceae            |

|      |     |       |         |                                                    |
|------|-----|-------|---------|----------------------------------------------------|
| 0    | 1   | 0 G   | 265976  | Serinicoccus                                       |
| 0    | 1   | 1 S   | 1078471 | Serinicoccus profundus                             |
| 0.43 | 775 | 11 O  | 85007   | Corynebacteriales                                  |
| 0.29 | 517 | 0 F   | 1653    | Corynebacteriaceae                                 |
| 0.29 | 517 | 33 G  | 1716    | Corynebacterium                                    |
| 0.11 | 194 | 194 S | 1979527 | Corynebacterium kefirresidentii                    |
| 0.06 | 117 | 117 S | 38304   | Corynebacterium tuberculoostearicum                |
| 0.03 | 46  | 46 S  | 43990   | Corynebacterium segmentosum                        |
| 0.01 | 24  | 24 S  | 161879  | Corynebacterium kroppenstedtii                     |
| 0.01 | 20  | 20 S  | 2594913 | Corynebacterium sanguinis                          |
| 0.01 | 18  | 18 S  | 38290   | Corynebacterium macginleyi                         |
| 0.01 | 10  | 0 S   | 1404244 | Corynebacterium glyciniphilum                      |
| 0.01 | 10  | 10 S1 | 1404245 | Corynebacterium glyciniphilum AJ 3170              |
| 0.01 | 10  | 10 S  | 401472  | Corynebacterium ureicelerivorans                   |
| 0    | 6   | 0 G1  | 2624378 | unclassified Corynebacterium                       |
| 0    | 3   | 3 S   | 2675216 | Corynebacterium sp. 1959                           |
| 0    | 2   | 2 S   | 2754725 | Corynebacterium sp. Marseille-Q3630                |
| 0    | 1   | 1 S   | 702967  | Corynebacterium sp. NML98-0116                     |
| 0    | 6   | 6 S   | 169292  | Corynebacterium aurimucosum                        |
| 0    | 5   | 5 S   | 35757   | Corynebacterium cystitidis                         |
| 0    | 5   | 5 S   | 43770   | Corynebacterium striatum                           |
| 0    | 4   | 4 S   | 43768   | Corynebacterium matruchotii                        |
| 0    | 3   | 0 S   | 1230998 | Corynebacterium frankenforstense                   |
| 0    | 3   | 3 S1  | 1437875 | Corynebacterium frankenforstense DSM 45800         |
| 0    | 3   | 0 S   | 225326  | Corynebacterium halotolerans                       |
| 0    | 3   | 3 S1  | 1121362 | Corynebacterium halotolerans YIM 70093 = DSM 44683 |
| 0    | 3   | 3 S   | 161899  | Corynebacterium singulare                          |
| 0    | 2   | 0 S   | 575200  | Corynebacterium maris                              |
| 0    | 2   | 2 S1  | 1224163 | Corynebacterium maris DSM 45190                    |
| 0    | 2   | 2 S   | 156976  | Corynebacterium riegliei                           |
| 0    | 2   | 2 S   | 146827  | Corynebacterium simulans                           |
| 0    | 1   | 1 S   | 1471400 | Corynebacterium pelargi                            |
| 0    | 1   | 1 S   | 35755   | Corynebacterium kutscheri                          |
| 0    | 1   | 1 S   | 38289   | Corynebacterium jeikeium                           |
| 0    | 1   | 0 S   | 38305   | Corynebacterium vitae                              |
| 0    | 1   | 1 S1  | 1224164 | Corynebacterium vitae DSM 20294                    |
| 0.05 | 86  | 0 F   | 85025   | Nocardiaceae                                       |
| 0.05 | 85  | 15 G  | 1827    | Rhodococcus                                        |
| 0.03 | 51  | 0 G1  | 192944  | unclassified Rhodococcus                           |
| 0.02 | 41  | 41 S  | 2795031 | Rhodococcus sp. P-2                                |
| 0    | 5   | 5 S   | 2507582 | Rhodococcus sp. ABRD24                             |
| 0    | 4   | 4 S   | 1045808 | Rhodococcus sp. YL-1                               |
| 0    | 1   | 1 S   | 2499145 | Rhodococcus sp. X156                               |
| 0.01 | 13  | 13 S  | 334542  | Rhodococcus qingshengii                            |
| 0    | 5   | 5 S   | 1833    | Rhodococcus erythropolis                           |
| 0    | 1   | 1 S   | 1830    | Rhodococcus ruber                                  |
| 0    | 1   | 0 G   | 1817    | Nocardia                                           |
| 0    | 1   | 1 S   | 37329   | Nocardia farcinica                                 |
| 0.04 | 80  | 3 F   | 1762    | Mycobacteriaceae                                   |
| 0.03 | 52  | 0 G   | 1763    | Mycobacterium                                      |
| 0.02 | 36  | 36 S  | 1789    | Mycobacterium xenopi                               |
| 0    | 9   | 9 S   | 1389713 | Mycobacterium paragordoniae                        |
| 0    | 5   | 5 S   | 1768    | Mycobacterium kansasii                             |
| 0    | 1   | 1 S   | 2492438 | Mycobacterium novum                                |
| 0    | 1   | 0 G1  | 77643   | Mycobacterium tuberculosis complex                 |
| 0    | 1   | 1 S   | 78331   | Mycobacterium canettii                             |
| 0.01 | 25  | 2 G   | 1866885 | Mycolicibacterium                                  |
| 0.01 | 11  | 11 S  | 67081   | Mycolicibacterium alvei                            |
| 0    | 5   | 5 S   | 1794    | Mycolicibacterium gadium                           |
| 0    | 1   | 1 S   | 1431246 | Mycolicibacterium anyangense                       |
| 0    | 1   | 1 S   | 1286181 | Mycolicibacterium arabiense                        |
| 0    | 1   | 1 S   | 1286180 | Mycolicibacterium sediminis                        |
| 0    | 1   | 1 S   | 1791    | Mycolicibacterium aurum                            |
| 0    | 1   | 1 S   | 319706  | Mycolicibacterium phocaicum                        |
| 0    | 1   | 1 S   | 53462   | Mycolicibacterium mageritense                      |
| 0    | 1   | 0 S   | 1804    | Mycolicibacterium gilvum                           |
| 0    | 1   | 1 S1  | 350054  | Mycolicibacterium gilvum PYR-GCK                   |
| 0.02 | 32  | 0 F   | 85026   | Gordoniaceae                                       |
| 0.02 | 32  | 10 G  | 2053    | Gordonia                                           |
| 0.01 | 12  | 12 S  | 2055    | Gordonia terrae                                    |
| 0    | 7   | 7 S   | 2054    | Gordonia bronchialis                               |
| 0    | 2   | 2 S   | 36822   | Gordonia rubripertincta                            |
| 0    | 1   | 0 S   | 84595   | Gordonia polyisoprenivorans                        |
| 0    | 1   | 1 S1  | 1112204 | Gordonia polyisoprenivorans VH2                    |
| 0.01 | 21  | 0 F   | 85028   | Tsukamurellaceae                                   |
| 0.01 | 21  | 1 G   | 2060    | Tsukamurella                                       |
| 0.01 | 12  | 12 S  | 57704   | Tsukamurella tyrosinosolvans                       |
| 0    | 8   | 8 S   | 2061    | Tsukamurella paurometabola                         |
| 0.01 | 18  | 0 F   | 2805586 | Lawsonellaceae                                     |
| 0.01 | 18  | 0 G   | 1847725 | Lawsonella                                         |
| 0.01 | 18  | 18 S  | 1528099 | Lawsonella clevelandensis                          |
| 0.01 | 10  | 0 F   | 85029   | Dietziaceae                                        |
| 0.01 | 10  | 1 G   | 37914   | Dietzia                                            |
| 0    | 5   | 0 G1  | 2617939 | unclassified Dietzia                               |
| 0    | 5   | 5 S   | 712270  | Dietzia sp. oral taxon 368                         |
| 0    | 2   | 2 S   | 499555  | Dietzia timorensis                                 |
| 0    | 2   | 2 S   | 546160  | Dietzia lutea                                      |
| 0.04 | 65  | 0 O   | 85011   | Streptomycetales                                   |
| 0.04 | 65  | 3 F   | 2062    | Streptomycetaceae                                  |
| 0.03 | 62  | 34 G  | 1883    | Streptomyces                                       |
| 0.01 | 13  | 2 G1  | 2593676 | unclassified Streptomyces                          |
| 0    | 3   | 3 S   | 2721173 | Streptomyces sp. DSM 40868                         |
| 0    | 3   | 3 S   | 444103  | Streptomyces sp. CNQ-509                           |
| 0    | 2   | 2 S   | 2203205 | Streptomyces sp. WAC 01529                         |
| 0    | 1   | 1 S   | 2768069 | Streptomyces sp. CRXT-Y-14                         |
| 0    | 1   | 1 S   | 2695266 | Streptomyces sp. HM190                             |
| 0    | 1   | 1 S   | 2059884 | Streptomyces sp. CMB-StM0423                       |
| 0    | 4   | 0 S   | 379067  | Streptomyces bingchenggensis                       |
| 0    | 4   | 4 S1  | 749414  | Streptomyces bingchenggensis BCW-1                 |
| 0    | 4   | 4 S   | 67267   | Streptomyces alboflavus                            |
| 0    | 3   | 3 S   | 51201   | Streptomyces griseocarneus                         |
| 0    | 2   | 2 S   | 80860   | Streptomyces cyanogenus                            |
| 0    | 1   | 1 S   | 40318   | Streptomyces nodosus                               |
| 0    | 1   | 0 S   | 33903   | Streptomyces avermitilis                           |

|      |    |       |         |                                               |
|------|----|-------|---------|-----------------------------------------------|
| 0    | 1  | 1 S1  | 227882  | Streptomyces avermitilis MA-4680 = NBRC 14893 |
| 0.02 | 41 | 0 O   | 85004   | Bifidobacteriales                             |
| 0.02 | 41 | 0 F   | 31953   | Bifidobacteriaceae                            |
| 0.02 | 41 | 6 G   | 1678    | Bifidobacterium                               |
| 0.01 | 13 | 13 S  | 1681    | Bifidobacterium bifidum                       |
| 0.01 | 11 | 11 S  | 216816  | Bifidobacterium longum                        |
| 0    | 6  | 0 S   | 78448   | Bifidobacterium pullorum                      |
| 0    | 6  | 6 S1  | 78344   | Bifidobacterium pullorum subsp. gallinarum    |
| 0    | 3  | 3 S   | 1680    | Bifidobacterium adolescentis                  |
| 0    | 2  | 2 S   | 28026   | Bifidobacterium pseudocatenulatum             |
| 0.02 | 36 | 0 O   | 85010   | Pseudonocardiales                             |
| 0.02 | 36 | 1 F   | 2070    | Pseudonocardiaceae                            |
| 0.01 | 15 | 0 G   | 1835    | Saccharopolyspora                             |
| 0    | 9  | 9 S   | 1836    | Saccharopolyspora erythraea                   |
| 0    | 4  | 4 S   | 2665642 | Saccharopolyspora coralli                     |
| 0    | 1  | 1 S   | 60894   | Saccharopolyspora spinosa                     |
| 0    | 1  | 1 S   | 333966  | Saccharopolyspora pogona                      |
| 0    | 8  | 4 G   | 40566   | Actinosynnema                                 |
| 0    | 4  | 4 S   | 42197   | Actinosynnema pretiosum                       |
| 0    | 3  | 3 G   | 1851    | Saccharomonospora                             |
| 0    | 2  | 0 G   | 1813    | Amycolatopsis                                 |
| 0    | 1  | 1 S   | 33910   | Amycolatopsis mediterranei                    |
| 0    | 1  | 0 G1  | 2618356 | unclassified Amycolatopsis                    |
| 0    | 1  | 1 S   | 2742131 | Amycolatopsis sp. Hca4                        |
| 0    | 2  | 0 G   | 1847    | Pseudonocardia                                |
| 0    | 1  | 0 S   | 240495  | Pseudonocardia dioxanivorans                  |
| 0    | 1  | 1 S1  | 675635  | Pseudonocardia dioxanivorans CB1190           |
| 0    | 1  | 0 G1  | 2619320 | unclassified Pseudonocardia                   |
| 0    | 1  | 1 S   | 1641402 | Pseudonocardia sp. HH130629-09                |
| 0    | 2  | 0 G   | 2071    | Saccharothrix                                 |
| 0    | 1  | 0 S   | 103731  | Saccharothrix espanaensis                     |
| 0    | 1  | 1 S1  | 1179773 | Saccharothrix espanaensis DSM 44229           |
| 0    | 1  | 0 G1  | 2593673 | unclassified Saccharothrix                    |
| 0    | 1  | 1 S   | 2781735 | Saccharothrix sp. 6-C                         |
| 0    | 2  | 0 G   | 1137960 | Allokutzneria                                 |
| 0    | 2  | 2 S   | 211114  | Allokutzneria alбата                          |
| 0    | 1  | 1 G   | 65496   | Actinoalloteichus                             |
| 0.01 | 20 | 0 O   | 85012   | Streptosporangiales                           |
| 0.01 | 10 | 0 F   | 2004    | Streptosporangiaceae                          |
| 0    | 6  | 3 G   | 2000    | Streptosporangium                             |
| 0    | 2  | 0 G1  | 2632669 | unclassified Streptosporangium                |
| 0    | 2  | 2 S   | 2202249 | Streptosporangium sp. 'caverna'               |
| 0    | 1  | 0 S   | 2001    | Streptosporangium roseum                      |
| 0    | 1  | 1 S1  | 479432  | Streptosporangium roseum DSM 43021            |
| 0    | 4  | 2 G   | 83681   | Nonomuraea                                    |
| 0    | 1  | 0 G1  | 2593643 | unclassified Nonomuraea                       |
| 0    | 1  | 1 S   | 1909395 | Nonomuraea sp. ATCC 55076                     |
| 0    | 1  | 1 S   | 2656914 | Nonomuraea nitratireducens                    |
| 0.01 | 10 | 0 F   | 2012    | Thermomonosporaceae                           |
| 0.01 | 10 | 0 G   | 1988    | Actinomadura                                  |
| 0.01 | 10 | 5 G1  | 2626254 | unclassified Actinomadura                     |
| 0    | 3  | 3 S   | 2742128 | Actinomadura sp. NAK00032                     |
| 0    | 1  | 1 S   | 1219491 | Actinomadura sp. WMMB 499                     |
| 0    | 1  | 1 S   | 2591108 | Actinomadura sp. WMMA1423                     |
| 0.01 | 15 | 0 O   | 2037    | Actinomycetales                               |
| 0.01 | 15 | 1 F   | 2049    | Actinomycetaceae                              |
| 0.01 | 12 | 6 G   | 1654    | Actinomycetes                                 |
| 0    | 4  | 4 S   | 1655    | Actinomyces naeslundii                        |
| 0    | 2  | 2 S   | 2057800 | Actinomyces qlguomingii                       |
| 0    | 1  | 0 G   | 1522056 | Flaviflexus                                   |
| 0    | 1  | 1 S   | 1282737 | Flaviflexus salsibiostraticola                |
| 0    | 1  | 0 G   | 2529408 | Schaalia                                      |
| 0    | 1  | 0 G1  | 2691889 | unclassified Schaalia                         |
| 0    | 1  | 1 S   | 2758572 | Schaalia sp. JY-X169                          |
| 0.01 | 10 | 0 O   | 85008   | Micromonosporales                             |
| 0.01 | 10 | 3 F   | 28056   | Micromonosporaceae                            |
| 0    | 4  | 0 G   | 1865    | Actinoplanes                                  |
| 0    | 4  | 0 G1  | 2626549 | unclassified Actinoplanes                     |
| 0    | 4  | 4 S   | 649831  | Actinoplanes sp. N902-109                     |
| 0    | 3  | 0 G   | 1873    | Micromonospora                                |
| 0    | 2  | 2 S   | 47875   | Micromonospora sagamiensis                    |
| 0    | 1  | 1 S   | 1881    | Micromonospora viridifaciens                  |
| 0    | 5  | 0 O   | 1643682 | Geodermatophilales                            |
| 0    | 5  | 0 F   | 85030   | Geodermatophilaceae                           |
| 0    | 5  | 0 G   | 88138   | Modestobacter                                 |
| 0    | 5  | 5 S   | 477641  | Modestobacter marinus                         |
| 0    | 4  | 0 O   | 85013   | Frankiales                                    |
| 0    | 4  | 0 F   | 74712   | Frankiaceae                                   |
| 0    | 4  | 0 G   | 1854    | Frankia                                       |
| 0    | 3  | 0 S   | 1859    | Frankia alni                                  |
| 0    | 3  | 3 S1  | 326424  | Frankia alni ACN14a                           |
| 0    | 1  | 1 S   | 106370  | Frankia casuarinae                            |
| 0.02 | 29 | 0 C   | 84995   | Rubrobacteria                                 |
| 0.02 | 29 | 0 O   | 84996   | Rubrobacteriales                              |
| 0.02 | 29 | 0 F   | 84997   | Rubrobacteriaceae                             |
| 0.02 | 29 | 0 G   | 42255   | Rubrobacter                                   |
| 0.02 | 29 | 14 S  | 49319   | Rubrobacter xylanophilus                      |
| 0.01 | 15 | 15 S1 | 266117  | Rubrobacter xylanophilus DSM 9941             |
| 0.01 | 10 | 0 C   | 1497346 | Thermoleophilia                               |
| 0.01 | 10 | 0 O   | 588673  | Solirubrobacteriales                          |
| 0.01 | 10 | 0 F   | 320583  | Conexibacteraceae                             |
| 0.01 | 10 | 0 G   | 191494  | Conexibacter                                  |
| 0.01 | 10 | 0 S   | 191495  | Conexibacter woesei                           |
| 0.01 | 10 | 10 S1 | 469383  | Conexibacter woesei DSM 14684                 |
| 0    | 9  | 0 C   | 84998   | Coriobacteriia                                |
| 0    | 6  | 0 O   | 84999   | Coriobacteriales                              |
| 0    | 6  | 0 F   | 84107   | Coriobacteriaceae                             |
| 0    | 6  | 0 G   | 102106  | Collinsella                                   |
| 0    | 6  | 6 S   | 74426   | Collinsella aerofaciens                       |
| 0    | 3  | 0 O   | 1643822 | Eggerthellales                                |
| 0    | 3  | 0 F   | 1643826 | Eggerthellaceae                               |
| 0    | 2  | 0 G   | 84111   | Eggerthella                                   |
| 0    | 2  | 2 S   | 84112   | Eggerthella lenta                             |
| 0    | 1  | 1 G   | 447020  | Adlercreutzia                                 |



|      |      |        |         |                                                                |
|------|------|--------|---------|----------------------------------------------------------------|
| 1.79 | 3219 | 5 P    | 1239    | Firmicutes                                                     |
| 1.4  | 2522 | 0 C    | 91061   | Bacilli                                                        |
| 0.79 | 1417 | 3 O    | 186826  | Lactobacillales                                                |
| 0.68 | 1221 | 0 F    | 33958   | Lactobacillaceae                                               |
| 0.66 | 1195 | 0 G    | 1578    | Lactobacillus                                                  |
| 0.65 | 1171 | 282 S  | 1584    | Lactobacillus delbrueckii                                      |
| 0.49 | 888  | 888 S1 | 29397   | Lactobacillus delbrueckii subsp. lactis                        |
| 0    | 1    | 0 S1   | 1537158 | Lactobacillus delbrueckii subsp. jakobsenii                    |
| 0    | 1    | 1 S2   | 1217420 | Lactobacillus delbrueckii subsp. jakobsenii ZN7a-9 = DSM 26046 |
| 0.01 | 16   | 16 S   | 47770   | Lactobacillus crispatus                                        |
| 0    | 6    | 6 S    | 147802  | Lactobacillus iners                                            |
| 0    | 1    | 0 S    | 33959   | Lactobacillus johnsonii                                        |
| 0    | 1    | 1 S1   | 633699  | Lactobacillus johnsonii F19785                                 |
| 0    | 1    | 1 S    | 109790  | Lactobacillus jensenii                                         |
| 0.01 | 17   | 0 G    | 2742598 | Limosilactobacillus                                            |
| 0.01 | 15   | 15 S   | 1598    | Limosilactobacillus reuteri                                    |
| 0    | 2    | 2 S    | 1633    | Limosilactobacillus vaginalis                                  |
| 0    | 9    | 1 G    | 1243    | Leuconostoc                                                    |
| 0    | 7    | 7 S    | 33964   | Leuconostoc citreum                                            |
| 0    | 1    | 1 S    | 1245    | Leuconostoc mesenteroides                                      |
| 0.09 | 165  | 0 F    | 1300    | Streptococcaceae                                               |
| 0.09 | 162  | 38 G   | 1301    | Streptococcus                                                  |
| 0.02 | 41   | 41 S   | 28037   | Streptococcus mitis                                            |
| 0.01 | 21   | 6 G1   | 2608887 | unclassified Streptococcus                                     |
| 0.01 | 14   | 14 S   | 2610896 | Streptococcus sp. LPB0220                                      |
| 0    | 1    | 1 S    | 2598453 | Streptococcus sp. 116-D4                                       |
| 0.01 | 16   | 16 S   | 1313    | Streptococcus pneumoniae                                       |
| 0.01 | 12   | 12 S   | 1308    | Streptococcus thermophilus                                     |
| 0.01 | 11   | 11 S   | 1305    | Streptococcus sanguinis                                        |
| 0.01 | 10   | 10 S   | 1304    | Streptococcus salivarius                                       |
| 0    | 7    | 7 S    | 1302    | Streptococcus gordonii                                         |
| 0    | 4    | 0 S    | 1318    | Streptococcus parasanguinis                                    |
| 0    | 2    | 2 S1   | 760570  | Streptococcus parasanguinis ATCC 15912                         |
| 0    | 2    | 2 S1   | 1114965 | Streptococcus parasanguinis FW213                              |
| 0    | 2    | 2 S    | 1303    | Streptococcus oralis                                           |
| 0    | 3    | 0 G    | 1357    | Lactococcus                                                    |
| 0    | 2    | 2 S    | 1358    | Lactococcus lactis                                             |
| 0    | 1    | 1 S    | 1359    | Lactococcus cremoris                                           |
| 0.01 | 17   | 0 F    | 81852   | Enterococcaceae                                                |
| 0.01 | 17   | 0 G    | 1350    | Enterococcus                                                   |
| 0.01 | 15   | 15 S   | 44008   | Enterococcus cecorum                                           |
| 0    | 2    | 2 S    | 1351    | Enterococcus faecalis                                          |
| 0    | 6    | 0 F    | 186827  | Aerococcaceae                                                  |
| 0    | 5    | 0 G    | 46123   | Abiotrophia                                                    |
| 0    | 5    | 5 S    | 46125   | Abiotrophia defectiva                                          |
| 0    | 1    | 0 G    | 1375    | Aerococcus                                                     |
| 0    | 1    | 1 S    | 1377    | Aerococcus viridans                                            |
| 0    | 5    | 0 F    | 186828  | Carnobacteriaceae                                              |
| 0    | 5    | 0 G    | 29393   | Dolosigranulum                                                 |
| 0    | 5    | 5 S    | 29394   | Dolosigranulum pigrum                                          |
| 0.61 | 1105 | 6 O    | 1385    | Bacillales                                                     |
| 0.56 | 1015 | 3 F    | 90964   | Staphylococcaceae                                              |
| 0.55 | 991  | 73 G   | 1279    | Staphylococcus                                                 |
| 0.2  | 366  | 366 S  | 29388   | Staphylococcus capitis                                         |
| 0.18 | 332  | 316 S  | 1282    | Staphylococcus epidermidis                                     |
| 0.01 | 16   | 16 S1  | 1449752 | Staphylococcus epidermidis PM221                               |
| 0.06 | 113  | 113 S  | 33028   | Staphylococcus saccharolyticus                                 |
| 0.04 | 67   | 67 S   | 1292    | Staphylococcus warneri                                         |
| 0.01 | 13   | 13 S   | 1280    | Staphylococcus aureus                                          |
| 0.01 | 10   | 10 S   | 1283    | Staphylococcus haemolyticus                                    |
| 0    | 5    | 5 S    | 29385   | Staphylococcus saprophyticus                                   |
| 0    | 5    | 5 S    | 1290    | Staphylococcus hominis                                         |
| 0    | 3    | 3 S    | 45972   | Staphylococcus pasteurii                                       |
| 0    | 1    | 1 S    | 170573  | Staphylococcus pettenkoferi                                    |
| 0    | 1    | 0 G1   | 91994   | unclassified Staphylococcus                                    |
| 0    | 1    | 1 S    | 2799680 | Staphylococcus sp. 11-B-312                                    |
| 0    | 1    | 1 S    | 28035   | Staphylococcus lugdunensis                                     |
| 0    | 1    | 0 S    | 1286    | Staphylococcus simulans                                        |
| 0    | 1    | 1 S1   | 1287    | Staphylococcus simulans bv. staphylolyticus                    |
| 0.01 | 13   | 0 G    | 2803850 | Mammaliococcus                                                 |
| 0.01 | 13   | 13 S   | 42858   | Mammaliococcus lentus                                          |
| 0    | 8    | 0 G    | 227979  | Jeotgaliococcus                                                |
| 0    | 8    | 8 S    | 1461582 | Jeotgaliococcus saudimassiliensis                              |
| 0.03 | 50   | 6 F    | 186817  | Bacillaceae                                                    |
| 0.01 | 21   | 0 G    | 1276290 | Caldibacillus                                                  |
| 0.01 | 21   | 21 S   | 35841   | Caldibacillus thermoamylovorans                                |
| 0.01 | 11   | 0 G    | 2817139 | Weizmannia                                                     |
| 0.01 | 11   | 11 S   | 1398    | Weizmannia coagulans                                           |
| 0    | 9    | 0 G    | 1386    | Bacillus                                                       |
| 0    | 5    | 5 S    | 38875   | Bacillus oleronius                                             |
| 0    | 4    | 0 G1   | 86661   | Bacillus cereus group                                          |
| 0    | 4    | 4 S    | 1392    | Bacillus anthracis                                             |
| 0    | 1    | 0 G    | 2675232 | Neobacillus                                                    |
| 0    | 1    | 1 S    | 1215031 | Neobacillus thermocopriae                                      |
| 0    | 1    | 0 G    | 1329200 | Fictibacillus                                                  |
| 0    | 1    | 1 S    | 255247  | Fictibacillus arsenicus                                        |
| 0    | 1    | 0 G    | 150247  | Anoxybacillus                                                  |
| 0    | 1    | 1 S    | 33934   | Anoxybacillus flavithermus                                     |
| 0.01 | 16   | 0 O1   | 539002  | Bacillales incertae sedis                                      |
| 0.01 | 16   | 0 O2   | 539738  | Bacillales Family XI. Incertae Sedis                           |
| 0.01 | 16   | 3 G    | 1378    | Gemella                                                        |
| 0.01 | 12   | 12 S   | 29391   | Gemella morbillorum                                            |
| 0    | 1    | 1 S    | 1379    | Gemella haemolysans                                            |
| 0    | 7    | 1 F    | 186822  | Paenibacillaceae                                               |
| 0    | 6    | 2 G    | 44249   | Paenibacillus                                                  |
| 0    | 4    | 0 G1   | 185978  | unclassified Paenibacillus                                     |
| 0    | 2    | 2 S    | 2660554 | Paenibacillus sp. B01                                          |
| 0    | 2    | 2 S    | 2023772 | Paenibacillus sp. RUD330                                       |
| 0    | 7    | 0 F    | 186823  | Alicyclobacillaceae                                            |
| 0    | 7    | 0 G    | 29330   | Alicyclobacillus                                               |
| 0    | 7    | 0 G1   | 2622400 | unclassified Alicyclobacillus                                  |
| 0    | 7    | 7 S    | 2665646 | Alicyclobacillus sp. S09                                       |
| 0    | 4    | 0 F    | 186818  | Planococcaceae                                                 |
| 0    | 4    | 0 G    | 1372    | Planococcus                                                    |

|      |     |       |         |                                       |
|------|-----|-------|---------|---------------------------------------|
| 0    | 4   | 4 S   | 1215089 | Planococcus halocryophilus            |
| 0.23 | 408 | 0 C   | 186801  | Clostridia                            |
| 0.23 | 408 | 32 O  | 186802  | Eubacteriales                         |
| 0.12 | 209 | 1 F   | 216572  | Oscillospiraceae                      |
| 0.09 | 167 | 0 G   | 216851  | Faecalibacterium                      |
| 0.09 | 167 | 129 S | 853     | Faecalibacterium prausnitzii          |
| 0.01 | 26  | 26 S1 | 718252  | Faecalibacterium prausnitzii L2-6     |
| 0.01 | 12  | 12 S1 | 657322  | Faecalibacterium prausnitzii SL3/3    |
| 0.02 | 34  | 0 G   | 1263    | Ruminococcus                          |
| 0.02 | 33  | 33 S  | 1160721 | Ruminococcus bicirculans              |
| 0    | 1   | 0 S   | 1264    | Ruminococcus albus                    |
| 0    | 1   | 1 S1  | 697329  | Ruminococcus albus 7 = DSM 20455      |
| 0    | 3   | 0 G   | 459786  | Oscillibacter                         |
| 0    | 3   | 0 G1  | 2629304 | unclassified Oscillibacter            |
| 0    | 2   | 2 S   | 2763056 | Oscillibacter sp. NSJ-62              |
| 0    | 1   | 1 S   | 2109687 | Oscillibacter sp. PEA192              |
| 0    | 2   | 0 G   | 2591381 | Dysosmobacter                         |
| 0    | 2   | 2 S   | 2093857 | Dysosmobacter welbionis               |
| 0    | 1   | 0 G   | 1905344 | Ruthenibacterium                      |
| 0    | 1   | 1 S   | 1550024 | Ruthenibacterium lactatiformans       |
| 0    | 1   | 0 G   | 2304691 | Thermoclostridium                     |
| 0    | 1   | 1 S   | 1510    | Thermoclostridium stercorarium        |
| 0.07 | 134 | 12 F  | 186803  | Lachnospiraceae                       |
| 0.03 | 50  | 0 G   | 841     | Roseburia                             |
| 0.03 | 47  | 19 S  | 166486  | Roseburia intestinalis                |
| 0.01 | 19  | 19 S1 | 657315  | Roseburia intestinalis M50/1          |
| 0    | 8   | 8 S1  | 536231  | Roseburia intestinalis L1-82          |
| 0    | 1   | 1 S1  | 718255  | Roseburia intestinalis XB6B4          |
| 0    | 3   | 3 S   | 301301  | Roseburia hominis                     |
| 0.01 | 17  | 0 G   | 572511  | Blautia                               |
| 0.01 | 13  | 0 G1  | 2648079 | unclassified Blautia                  |
| 0.01 | 13  | 13 S  | 2479767 | Blautia sp. SC05B48                   |
| 0    | 3   | 0 S   | 40520   | Blautia obeum                         |
| 0    | 3   | 3 S1  | 657314  | Blautia obeum A2-162                  |
| 0    | 1   | 1 S   | 33035   | Blautia producta                      |
| 0.01 | 16  | 0 G   | 28050   | Lachnospira                           |
| 0.01 | 16  | 0 S   | 39485   | Lachnospira eligens                   |
| 0.01 | 16  | 16 S1 | 515620  | [Eubacterium] eligens ATCC 27750      |
| 0.01 | 11  | 0 G   | 2316020 | Mediterraneibacter                    |
| 0.01 | 10  | 0 S   | 33039   | [Ruminococcus] torques                |
| 0.01 | 10  | 10 S1 | 657313  | [Ruminococcus] torques L2-14          |
| 0    | 1   | 1 S   | 33038   | [Ruminococcus] gnavus                 |
| 0    | 8   | 0 G   | 1506553 | Lachnoclostridium                     |
| 0    | 5   | 5 S   | 29347   | [Clostridium] scindens                |
| 0    | 3   | 3 S   | 1871021 | Lachnoclostridium phocaeense          |
| 0    | 7   | 0 G   | 207244  | Anaerostipes                          |
| 0    | 5   | 5 S   | 649756  | Anaerostipes hadrus                   |
| 0    | 2   | 2 S   | 105841  | Anaerostipes caccae                   |
| 0    | 6   | 0 G   | 33042   | Coproccoccus                          |
| 0    | 4   | 0 G1  | 2684943 | unclassified Coprococcus              |
| 0    | 4   | 4 S   | 751585  | Coprococcus sp. ART55/1               |
| 0    | 2   | 2 S   | 116085  | Coprococcus catus                     |
| 0    | 3   | 0 G   | 830     | Butyrivibrio                          |
| 0    | 3   | 3 S   | 831     | Butyrivibrio fibrisolvens             |
| 0    | 2   | 0 G   | 2719313 | Enterocloster                         |
| 0    | 2   | 2 S   | 208479  | Enterocloster bolteae                 |
| 0    | 1   | 0 G   | 2569097 | Anaerobutyricum                       |
| 0    | 1   | 1 S   | 39488   | Anaerobutyricum hallii                |
| 0    | 1   | 0 G   | 2719231 | Lacrimispora                          |
| 0    | 1   | 0 S   | 84030   | Lacrimispora saccharolytica           |
| 0    | 1   | 1 S1  | 717608  | [Clostridium] cf. saccharolyticum K10 |
| 0.01 | 17  | 0 O1  | 538999  | Eubacteriales incertae sedis          |
| 0    | 8   | 0 G   | 2039302 | Monoglobus                            |
| 0    | 8   | 8 S   | 1981510 | Monoglobus pectinilyticus             |
| 0    | 7   | 0 G   | 1918454 | Flintibacter                          |
| 0    | 7   | 0 G1  | 2610894 | unclassified Flintibacter             |
| 0    | 7   | 7 S   | 2610895 | Flintibacter sp. KGMBO0164            |
| 0    | 2   | 0 G   | 1392389 | Intestinimonas                        |
| 0    | 2   | 2 S   | 1297617 | Intestinimonas butyriciproducens      |
| 0.01 | 11  | 0 F   | 31979   | Clostridiaceae                        |
| 0.01 | 11  | 4 G   | 1485    | Clostridium                           |
| 0    | 3   | 3 S   | 1504    | Clostridium septicum                  |
| 0    | 2   | 2 S   | 1491    | Clostridium botulinum                 |
| 0    | 2   | 2 S   | 1502    | Clostridium perfringens               |
| 0    | 2   | 1 F   | 186804  | Peptostreptococcaceae                 |
| 0    | 1   | 0 G   | 1870884 | Clostridioides                        |
| 0    | 1   | 1 S   | 1496    | Clostridioides difficile              |
| 0    | 2   | 0 F   | 990719  | Christensenellaceae                   |
| 0    | 2   | 0 G   | 990721  | Christensenella                       |
| 0    | 2   | 2 S   | 626937  | Christensenella minuta                |
| 0    | 1   | 0 F   | 186806  | Eubacteriaceae                        |
| 0    | 1   | 0 G   | 1730    | Eubacterium                           |
| 0    | 1   | 1 S   | 2041044 | Eubacterium maltosivorans             |
| 0.14 | 260 | 0 C   | 526524  | Erysipelotrichia                      |
| 0.14 | 260 | 0 O   | 526525  | Erysipelotrichales                    |
| 0.14 | 258 | 0 F   | 2810281 | Turicibacteraceae                     |
| 0.14 | 258 | 0 G   | 191303  | Turicibacter                          |
| 0.09 | 168 | 168 S | 154288  | Turicibacter sanguinis                |
| 0.05 | 90  | 0 G1  | 2638206 | unclassified Turicibacter             |
| 0.05 | 90  | 90 S  | 1712675 | Turicibacter sp. H121                 |
| 0    | 2   | 0 F   | 128827  | Erysipelotrichaceae                   |
| 0    | 1   | 0 G   | 1647    | Erysipelothrix                        |
| 0    | 1   | 1 S   | 1514105 | Erysipelothrix larvae                 |
| 0    | 1   | 0 G   | 1505663 | Erysipelatoclostridium                |
| 0    | 1   | 1 S   | 1522    | [Clostridium] innocuum                |
| 0.01 | 17  | 0 C   | 909932  | Negativicutes                         |
| 0.01 | 10  | 0 O   | 1843489 | Veillonellales                        |
| 0.01 | 10  | 0 F   | 31977   | Veillonellaceae                       |
| 0.01 | 10  | 0 G   | 29465   | Veillonella                           |
| 0    | 5   | 5 S   | 39778   | Veillonella dispar                    |
| 0    | 4   | 4 S   | 29466   | Veillonella parvula                   |
| 0    | 1   | 1 S   | 2682456 | Veillonella nakazawae                 |
| 0    | 5   | 0 O   | 909929  | Selenomonadales                       |
| 0    | 5   | 0 F   | 1843491 | Selenomonadaceae                      |

|      |      |        |         |                                                   |
|------|------|--------|---------|---------------------------------------------------|
| 0    | 5    | 0 G    | 158846  | Megamonas                                         |
| 0    | 5    | 5 S    | 437897  | Megamonas funiformis                              |
| 0    | 2    | 0 O    | 1843488 | Acidaminococcales                                 |
| 0    | 2    | 0 F    | 909930  | Acidaminococcaceae                                |
| 0    | 2    | 0 G    | 33024   | Phascolarctobacterium                             |
| 0    | 2    | 0 G1   | 2639160 | unclassified Phascolarctobacterium                |
| 0    | 2    | 2 S    | 2823317 | Phascolarctobacterium sp. Marseille-Q4147         |
| 0    | 7    | 3 C    | 1737404 | Tissierella                                       |
| 0    | 4    | 0 O    | 1737405 | Tissierellales                                    |
| 0    | 4    | 0 F    | 1570339 | Peptoniphilaceae                                  |
| 0    | 4    | 0 G    | 150022  | Finegoldia                                        |
| 0    | 4    | 4 S    | 1260    | Finegoldia magna                                  |
| 0.03 | 56   | 0 P    | 1297    | Deinococcus-Thermus                               |
| 0.03 | 56   | 0 C    | 188787  | Deinococci                                        |
| 0.03 | 53   | 0 O    | 118964  | Deinococcales                                     |
| 0.03 | 53   | 0 F    | 183710  | Deinococcaceae                                    |
| 0.03 | 53   | 12 G   | 1298    | Deinococcus                                       |
| 0.01 | 11   | 11 S   | 1211322 | Deinococcus metallilatus                          |
| 0    | 8    | 8 S    | 1768108 | Deinococcus actinosclerus                         |
| 0    | 6    | 5 S    | 980427  | Deinococcus wulumuqiensis                         |
| 0    | 1    | 1 S1   | 1288484 | Deinococcus wulumuqiensis R12                     |
| 0    | 5    | 0 S    | 309887  | Deinococcus maricopensis                          |
| 0    | 5    | 5 S1   | 709986  | Deinococcus maricopensis DSM 21211                |
| 0    | 3    | 0 S    | 55148   | Deinococcus proteolyticus                         |
| 0    | 3    | 3 S1   | 693977  | Deinococcus proteolyticus MRP                     |
| 0    | 2    | 0 S    | 310783  | Deinococcus deserti                               |
| 0    | 2    | 2 S1   | 546414  | Deinococcus deserti VCD115                        |
| 0    | 2    | 2 S    | 317577  | Deinococcus ficus                                 |
| 0    | 2    | 0 S    | 432329  | Deinococcus peraridilitoris                       |
| 0    | 2    | 2 S1   | 937777  | Deinococcus peraridilitoris DSM 19664             |
| 0    | 2    | 0 G1   | 2623546 | unclassified Deinococcus                          |
| 0    | 2    | 2 S    | 2652443 | Deinococcus sp. AJ005                             |
| 0    | 3    | 0 O    | 68933   | Thermales                                         |
| 0    | 3    | 0 F    | 188786  | Thermaceae                                        |
| 0    | 3    | 0 G    | 270     | Thermus                                           |
| 0    | 2    | 0 S    | 37636   | Thermus scotoductus                               |
| 0    | 2    | 2 S1   | 743525  | Thermus scotoductus SA-01                         |
| 0    | 1    | 0 S    | 56957   | Thermus oshimai                                   |
| 0    | 1    | 1 S1   | 751945  | Thermus oshimai JL-2                              |
| 0.01 | 26   | 0 D2   | 1798711 | Cyanobacteria/Melainabacteria group               |
| 0.01 | 26   | 0 P    | 1117    | Cyanobacteria                                     |
| 0.01 | 14   | 0 O    | 1890424 | Synechococcales                                   |
| 0.01 | 13   | 0 F    | 1890426 | Synechococcaceae                                  |
| 0.01 | 13   | 0 G    | 1129    | Synechococcus                                     |
| 0.01 | 13   | 6 G1   | 2626047 | unclassified Synechococcus                        |
| 0    | 7    | 7 S    | 1916956 | Synechococcus sp. SynAce01                        |
| 0    | 1    | 0 F    | 2303730 | Prochlorotrichaceae                               |
| 0    | 1    | 0 G    | 170610  | Halomicronema                                     |
| 0    | 1    | 0 S    | 1209493 | Halomicronema hongdechloris                       |
| 0    | 1    | 1 S1   | 1641165 | Halomicronema hongdechloris C2206                 |
| 0.01 | 10   | 0 P1   | 1301283 | Oscillatorioephyceae                              |
| 0.01 | 10   | 0 O    | 1150    | Oscillatoriales                                   |
| 0    | 9    | 0 F    | 1892252 | Microcoleaceae                                    |
| 0    | 9    | 0 G    | 44471   | Microcoleus                                       |
| 0    | 9    | 0 G1   | 2642155 | unclassified Microcoleus                          |
| 0    | 9    | 9 S    | 1173027 | Microcoleus sp. PCC 7113                          |
| 0    | 1    | 0 F    | 1892254 | Oscillatoriaceae                                  |
| 0    | 1    | 0 G    | 1155738 | Moorea                                            |
| 0    | 1    | 0 S    | 1155739 | Moorea producens                                  |
| 0    | 1    | 1 S1   | 1454205 | Moorea producens JHB                              |
| 0    | 1    | 0 O    | 1161    | Nostocales                                        |
| 0    | 1    | 0 F    | 1162    | Nostocaceae                                       |
| 0    | 1    | 0 G    | 1177    | Nostoc                                            |
| 0    | 1    | 0 G1   | 2593658 | unclassified Nostoc                               |
| 0    | 1    | 1 S    | 1618022 | Nostoc sp. 'Lobaría pulmonaria (5183) cyanobiont' |
| 0    | 1    | 0 C    | 307596  | Gloeobacteria                                     |
| 0    | 1    | 0 O    | 307595  | Gloeobacterales                                   |
| 0    | 1    | 0 F    | 1890422 | Gloeobacteraceae                                  |
| 0    | 1    | 0 G    | 33071   | Gloeobacter                                       |
| 0    | 1    | 0 S    | 33072   | Gloeobacter violaceus                             |
| 0    | 1    | 1 S1   | 251221  | Gloeobacter violaceus PCC 7421                    |
| 0    | 2    | 0 P    | 200795  | Chloroflexi                                       |
| 0    | 2    | 0 C    | 189775  | Thermomicrobia                                    |
| 0    | 2    | 0 C1   | 85000   | Sphaerobacteridae                                 |
| 0    | 2    | 0 O    | 85001   | Sphaerobacterales                                 |
| 0    | 2    | 0 O1   | 255728  | Sphaerobacterineae                                |
| 0    | 2    | 0 F    | 85002   | Sphaerobacteraceae                                |
| 0    | 2    | 0 G    | 2056    | Sphaerobacter                                     |
| 0    | 2    | 0 S    | 2057    | Sphaerobacter thermophilus                        |
| 0    | 2    | 2 S1   | 479434  | Sphaerobacter thermophilus DSM 20745              |
| 0    | 1    | 0 P    | 544448  | Tenericutes                                       |
| 0    | 1    | 0 C    | 31969   | Mollicutes                                        |
| 0    | 1    | 0 O    | 186329  | Acholeplasmatales                                 |
| 0    | 1    | 0 F    | 2146    | Acholeplasmataceae                                |
| 0    | 1    | 0 G    | 2147    | Acholeplasma                                      |
| 0    | 1    | 1 S    | 2148    | Acholeplasma laidlawii                            |
| 3.77 | 6791 | 0 D1   | 1783270 | FCB group                                         |
| 3.77 | 6791 | 0 D2   | 68336   | Bacteroidetes/Chlorobi group                      |
| 3.77 | 6791 | 17 P   | 976     | Bacteroidetes                                     |
| 2.46 | 4437 | 0 C    | 200643  | Bacteroidia                                       |
| 2.46 | 4437 | 280 O  | 171549  | Bacteroidales                                     |
| 1.88 | 3381 | 0 F    | 815     | Bacteroidaceae                                    |
| 1.88 | 3381 | 341 G  | 816     | Bacteroides                                       |
| 1.24 | 2228 | 2228 S | 818     | Bacteroides thetaiotaomicron                      |
| 0.22 | 401  | 399 S  | 817     | Bacteroides fragilis                              |
| 0    | 1    | 1 S1   | 295405  | Bacteroides fragilis YCH46                        |
| 0    | 1    | 1 S1   | 862962  | Bacteroides fragilis 638R                         |
| 0.08 | 138  | 138 S  | 820     | Bacteroides uniformis                             |
| 0.07 | 127  | 14 G1  | 2646097 | unclassified Bacteroides                          |
| 0.02 | 44   | 44 S   | 2785531 | Bacteroides sp. HF-162                            |
| 0.01 | 26   | 26 S   | 2650157 | Bacteroides sp. HF-5287                           |
| 0.01 | 18   | 18 S   | 2763022 | Bacteroides sp. M10                               |
| 0.01 | 13   | 13 S   | 2528203 | Bacteroides sp. A1C1                              |
| 0    | 8    | 8 S    | 2650158 | Bacteroides sp. HF-5141                           |

|      |      |       |         |                                       |
|------|------|-------|---------|---------------------------------------|
| 0    | 4    | 4 S   | 2755405 | Bacteroides sp. CACC 737              |
| 0.04 | 69   | 69 S  | 28116   | Bacteroides ovatus                    |
| 0.02 | 29   | 29 S  | 28111   | Bacteroides eggerthii                 |
| 0.02 | 29   | 27 S  | 371601  | Bacteroides xylanisolvens             |
| 0    | 2    | 2 S1  | 657309  | Bacteroides xylanisolvens XB1A        |
| 0.01 | 15   | 15 S  | 246787  | Bacteroides cellulosilyticus          |
| 0    | 2    | 2 S   | 1796613 | Bacteroides caecimuris                |
| 0    | 1    | 1 S   | 47678   | Bacteroides caccae                    |
| 0    | 1    | 1 S   | 329854  | Bacteroides intestinalis              |
| 0.34 | 619  | 0 O1  | 333046  | Bacteroidales incertae sedis          |
| 0.34 | 619  | 71 G  | 909656  | Phocaeicola                           |
| 0.21 | 373  | 373 S | 821     | Phocaeicola vulgatus                  |
| 0.09 | 167  | 80 S  | 357276  | Phocaeicola dorei                     |
| 0.05 | 87   | 87 S1 | 997877  | Bacteroides dorei CL03T12C01          |
| 0    | 7    | 7 S   | 387090  | Phocaeicola coprophilus               |
| 0    | 1    | 0 S   | 376805  | Phocaeicola salanitronis              |
| 0    | 1    | 1 S1  | 667015  | Phocaeicola salanitronis DSM 18170    |
| 0.03 | 57   | 0 F   | 171550  | Rikenellaceae                         |
| 0.03 | 57   | 4 G   | 239759  | Alistipes                             |
| 0.01 | 25   | 0 S   | 328813  | Alistipes onderdonkii                 |
| 0.01 | 25   | 25 S1 | 2585117 | Alistipes onderdonkii subsp. vulgaris |
| 0.01 | 14   | 14 S  | 2585118 | Alistipes communis                    |
| 0    | 8    | 0 S   | 214856  | Alistipes finegoldii                  |
| 0    | 8    | 8 S1  | 679935  | Alistipes finegoldii DSM 17242        |
| 0    | 2    | 0 S   | 328814  | Alistipes shahii                      |
| 0    | 2    | 2 S1  | 717959  | Alistipes shahii WAL 8301             |
| 0    | 2    | 2 S   | 2364787 | Alistipes megauti                     |
| 0    | 1    | 1 S   | 626932  | Alistipes indistinctus                |
| 0    | 1    | 1 S   | 2585119 | Alistipes dispar                      |
| 0.03 | 57   | 0 F   | 1853231 | Odoribacteraceae                      |
| 0.02 | 34   | 0 G   | 283168  | Odoribacter                           |
| 0.02 | 34   | 34 S  | 28118   | Odoribacter splanchnicus              |
| 0.01 | 23   | 9 G   | 574697  | Butyricimonas                         |
| 0.01 | 14   | 14 S  | 544645  | Butyricimonas virosa                  |
| 0.01 | 21   | 0 F   | 171552  | Prevotellaceae                        |
| 0.01 | 18   | 0 G   | 838     | Prevotella                            |
| 0    | 7    | 7 S   | 165179  | Prevotella copri                      |
| 0    | 6    | 6 S   | 28132   | Prevotella melaninogenica             |
| 0    | 4    | 4 S   | 28135   | Prevotella oris                       |
| 0    | 1    | 0 S   | 589437  | Prevotella scopos                     |
| 0    | 1    | 1 S1  | 1236518 | Prevotella scopos JCM 17725           |
| 0    | 3    | 0 G   | 577309  | Paraprevotella                        |
| 0    | 3    | 0 S   | 454155  | Paraprevotella xylaniphila            |
| 0    | 3    | 3 S1  | 762982  | Paraprevotella xylaniphila YIT 11841  |
| 0.01 | 19   | 0 F   | 2005525 | Tannerellaceae                        |
| 0.01 | 19   | 4 G   | 375288  | Parabacteroides                       |
| 0.01 | 14   | 14 S  | 823     | Parabacteroides distasonis            |
| 0    | 1    | 1 S   | 328812  | Parabacteroides goldsteinii           |
| 0    | 2    | 0 F   | 2005473 | Muribaculaceae                        |
| 0    | 2    | 0 G   | 2518495 | Duncaniella                           |
| 0    | 2    | 2 S   | 2518971 | Duncaniella dubosii                   |
| 0    | 1    | 0 F   | 171551  | Porphyromonadaceae                    |
| 0    | 1    | 0 G   | 836     | Porphyromonas                         |
| 0    | 1    | 1 S   | 837     | Porphyromonas gingivalis              |
| 0.74 | 1334 | 0 C   | 117743  | Flavobacteriia                        |
| 0.74 | 1334 | 7 O   | 200644  | Flavobacteriales                      |
| 0.72 | 1295 | 11 F  | 2762318 | Weeksellaceae                         |
| 0.38 | 690  | 39 F1 | 2782232 | Chryseobacterium group                |
| 0.29 | 529  | 92 G  | 59732   | Chryseobacterium                      |
| 0.09 | 156  | 156 S | 246     | Chryseobacterium balustinum           |
| 0.08 | 143  | 143 S | 254     | Chryseobacterium indoltheticum        |
| 0.04 | 67   | 0 G1  | 2593645 | unclassified Chryseobacterium         |
| 0.01 | 11   | 11 S  | 2547600 | Chryseobacterium sp. NBC 122          |
| 0.01 | 10   | 10 S  | 1721091 | Chryseobacterium sp. IHB B 17019      |
| 0.01 | 10   | 10 S  | 2015076 | Chryseobacterium sp. T16E-39          |
| 0.01 | 10   | 10 S  | 2478663 | Chryseobacterium sp. 3008163          |
| 0    | 8    | 8 S   | 2487065 | Chryseobacterium sp. G0201            |
| 0    | 7    | 7 S   | 2724619 | Chryseobacterium sp. NEB161           |
| 0    | 6    | 6 S   | 2758037 | Chryseobacterium sp. cx-624           |
| 0    | 3    | 3 S   | 1932669 | Chryseobacterium sp. JV274            |
| 0    | 2    | 2 S   | 2039166 | Chryseobacterium sp. 6424             |
| 0.01 | 24   | 24 S  | 1493872 | Chryseobacterium shandongense         |
| 0.01 | 21   | 21 S  | 1685010 | Chryseobacterium glaciei              |
| 0.01 | 10   | 10 S  | 1241982 | Chryseobacterium nakagawai            |
| 0    | 7    | 7 S   | 2754694 | Chryseobacterium manosquense          |
| 0    | 4    | 4 S   | 250     | Chryseobacterium gleum                |
| 0    | 3    | 3 S   | 1324352 | Chryseobacterium gallinarum           |
| 0    | 1    | 1 S   | 253     | Chryseobacterium indologenes          |
| 0    | 1    | 1 S   | 1124835 | Chryseobacterium carni pullorum       |
| 0.05 | 95   | 0 G   | 2782229 | Epilithonimonas                       |
| 0.05 | 95   | 95 S  | 2487072 | Epilithonimonas vandammei             |
| 0.01 | 26   | 0 G   | 2782231 | Kaistella                             |
| 0.01 | 23   | 23 S  | 421525  | Chryseobacterium haifense             |
| 0    | 3    | 3 S   | 266748  | Kaistella antarctica                  |
| 0    | 1    | 0 G   | 2782228 | Planobacterium                        |
| 0    | 1    | 1 S   | 536441  | Chryseobacterium taklimakanense       |
| 0.31 | 553  | 39 G  | 59734   | Empedobacter                          |
| 0.27 | 480  | 480 S | 343874  | Empedobacter falsenii                 |
| 0.02 | 28   | 28 S  | 1628248 | Empedobacter stercoris                |
| 0    | 6    | 6 S   | 247     | Empedobacter brevis                   |
| 0.02 | 29   | 0 G   | 501783  | Cloacibacterium                       |
| 0.02 | 29   | 29 S  | 237258  | Cloacibacterium normanense            |
| 0    | 6    | 0 G   | 308865  | Elizabethkingia                       |
| 0    | 5    | 5 S   | 1756150 | Elizabethkingia ursingii              |
| 0    | 1    | 1 S   | 1117645 | Elizabethkingia anophelis             |
| 0    | 6    | 0 G   | 1433995 | Cruoricaptor                          |
| 0    | 6    | 6 S   | 1118202 | Cruoricaptor ignavus                  |
| 0.02 | 32   | 0 F   | 49546   | Flavobacteriaceae                     |
| 0.01 | 14   | 1 G   | 1016    | Capnocytophaga                        |
| 0    | 7    | 7 S   | 2708117 | Capnocytophaga endodontalis           |
| 0    | 5    | 0 G1  | 2640652 | unclassified Capnocytophaga           |
| 0    | 5    | 5 S   | 2748316 | Capnocytophaga sp. oral taxon 902     |
| 0    | 1    | 1 S   | 1019    | Capnocytophaga sputigena              |
| 0    | 9    | 0 G   | 237     | Flavobacterium                        |

|      |     |       |         |                                    |
|------|-----|-------|---------|------------------------------------|
| 0    | 5   | 5 S   | 2175091 | Flavobacterium album               |
| 0    | 2   | 2 S   | 2172098 | Flavobacterium pallidum            |
| 0    | 1   | 0 G1  | 196869  | unclassified Flavobacterium        |
| 0    | 1   | 1 S   | 2294119 | Flavobacterium sp. CJ74            |
| 0    | 1   | 1 S   | 1306519 | Flavobacterium commune             |
| 0    | 4   | 0 G   | 363408  | Nonlabens                          |
| 0    | 4   | 4 S   | 331648  | Nonlabens spongiae                 |
| 0    | 3   | 0 G   | 76831   | Myroides                           |
| 0    | 3   | 3 S   | 76832   | Myroides odoratimimus              |
| 0    | 2   | 0 G   | 104267  | Tenacibaculum                      |
| 0    | 2   | 0 G1  | 2635139 | unclassified Tenacibaculum         |
| 0    | 2   | 2 S   | 2358479 | Tenacibaculum sp. DSM 106434       |
| 0.36 | 643 | 0 C   | 768503  | Cytophagia                         |
| 0.36 | 643 | 1 O   | 768507  | Cytophagales                       |
| 0.35 | 629 | 2 F   | 1853232 | Hymenobacteraceae                  |
| 0.35 | 625 | 11 G  | 89966   | Hymenobacter                       |
| 0.33 | 587 | 25 G1 | 2615202 | unclassified Hymenobacter          |
| 0.28 | 506 | 506 S | 2584940 | Hymenobacter sp. DG01              |
| 0.01 | 19  | 19 S  | 2735321 | Hymenobacter sp. TS19              |
| 0.01 | 14  | 14 S  | 2596915 | Hymenobacter sp. NBH84             |
| 0    | 7   | 7 S   | 1356852 | Hymenobacter sp. APR13             |
| 0    | 5   | 5 S   | 1385664 | Hymenobacter sp. DG25B             |
| 0    | 4   | 4 S   | 2675877 | Hymenobacter sp. BRD67             |
| 0    | 4   | 4 S   | 2675878 | Hymenobacter sp. BRD128            |
| 0    | 1   | 1 S   | 1484116 | Hymenobacter sp. PAMC 26554        |
| 0    | 1   | 1 S   | 1484118 | Hymenobacter sp. PAMC 26628        |
| 0    | 1   | 1 S   | 2761579 | Hymenobacter sp. S2-20-2           |
| 0.01 | 10  | 10 S  | 2724192 | Hymenobacter russus                |
| 0    | 8   | 0 S   | 1446467 | Hymenobacter swuensis              |
| 0    | 8   | 8 S1  | 1227739 | Hymenobacter swuensis DY53         |
| 0    | 6   | 6 S   | 2319843 | Hymenobacter oligotrophus          |
| 0    | 3   | 3 S   | 1385715 | Hymenobacter qilianensis           |
| 0    | 2   | 0 G   | 323449  | Pontibacter                        |
| 0    | 2   | 2 S   | 2694929 | Pontibacter russatus               |
| 0    | 9   | 0 F   | 89373   | Cytophagaceae                      |
| 0    | 9   | 0 G   | 107     | Spirosoma                          |
| 0    | 8   | 8 S   | 2666025 | Spirosoma endbachense              |
| 0    | 1   | 0 G1  | 2621999 | unclassified Spirosoma             |
| 0    | 1   | 1 S   | 2710596 | Spirosoma sp. PL0136               |
| 0    | 4   | 0 F   | 563798  | Cyclobacteriaceae                  |
| 0    | 4   | 0 G   | 390846  | Echinicola                         |
| 0    | 4   | 0 S   | 390884  | Echinicola vietnamensis            |
| 0    | 4   | 4 S1  | 926556  | Echinicola vietnamensis DSM 17526  |
| 0.19 | 350 | 0 C   | 117747  | Sphingobacteriia                   |
| 0.19 | 350 | 0 O   | 200666  | Sphingobacteriales                 |
| 0.19 | 350 | 0 F   | 84566   | Sphingobacteriaceae                |
| 0.19 | 343 | 13 G  | 28453   | Sphingobacterium                   |
| 0.11 | 190 | 190 S | 28454   | Sphingobacterium multivorum        |
| 0.08 | 139 | 13 G1 | 2609468 | unclassified Sphingobacterium      |
| 0.06 | 112 | 112 S | 2795738 | Sphingobacterium sp. UDSM-2020     |
| 0    | 7   | 7 S   | 2003121 | Sphingobacterium sp. G1-14         |
| 0    | 6   | 6 S   | 1933220 | Sphingobacterium sp. B29           |
| 0    | 1   | 1 S   | 1538644 | Sphingobacterium sp. ML3W          |
| 0    | 1   | 1 S   | 371142  | Sphingobacterium daejeonense       |
| 0    | 5   | 0 G   | 84567   | Pedobacter                         |
| 0    | 5   | 5 S   | 363852  | Pedobacter ginsengisoli            |
| 0    | 2   | 0 G   | 1649482 | Pseudopedobacter                   |
| 0    | 2   | 0 S   | 151895  | Pseudopedobacter saltans           |
| 0    | 2   | 2 S1  | 762903  | Pseudopedobacter saltans DSM 12145 |
| 0.01 | 10  | 0 C   | 1853228 | Chitinophagia                      |
| 0.01 | 10  | 0 O   | 1853229 | Chitinophagales                    |
| 0.01 | 10  | 1 F   | 563835  | Chitinophagaceae                   |
| 0    | 6   | 0 G   | 79328   | Chitinophaga                       |
| 0    | 4   | 4 S   | 2029983 | Chitinophaga caeni                 |
| 0    | 2   | 2 S   | 2203219 | Chitinophaga alhagiae              |
| 0    | 2   | 0 G   | 379899  | Niabella                           |
| 0    | 2   | 0 S   | 446683  | Niabella soli                      |
| 0    | 2   | 2 S1  | 929713  | Niabella soli DSM 19437            |
| 0    | 1   | 0 G   | 1860196 | Pseudobacter                       |
| 0    | 1   | 1 S   | 661488  | Pseudobacter ginsenosidimutans     |
| 0.01 | 20  | 0 D1  | 1783257 | PVC group                          |
| 0.01 | 12  | 0 P   | 204428  | Chlamydiae                         |
| 0.01 | 12  | 1 C   | 204429  | Chlamydia                          |
| 0.01 | 11  | 0 O   | 1963360 | Parachlamydiales                   |
| 0.01 | 11  | 11 F  | 92713   | Parachlamydiaceae                  |
| 0    | 4   | 0 P   | 74201   | Verrucomicrobia                    |
| 0    | 2   | 0 C   | 203494  | Verrucomicrobiae                   |
| 0    | 2   | 0 O   | 48461   | Verrucomicrobiales                 |
| 0    | 2   | 0 F   | 1647988 | Akkermansiaceae                    |
| 0    | 2   | 0 G   | 239934  | Akkermansia                        |
| 0    | 2   | 2 S   | 239935  | Akkermansia muciniphila            |
| 0    | 1   | 0 P1  | 326457  | Verrucomicrobia incertae sedis     |
| 0    | 1   | 0 G   | 1541670 | Methylococcimicrobium              |
| 0    | 1   | 0 G1  | 2730358 | unclassified Methylococcimicrobium |
| 0    | 1   | 1 S   | 2730359 | Methylococcimicrobium sp. AP8      |
| 0    | 1   | 0 C   | 414999  | Opitutae                           |
| 0    | 1   | 0 O   | 415000  | Opitutales                         |
| 0    | 1   | 0 F   | 134623  | Opitutaceae                        |
| 0    | 1   | 0 G   | 178440  | Opitutus                           |
| 0    | 1   | 0 G1  | 2649488 | unclassified Opitutus              |
| 0    | 1   | 1 S   | 1882749 | Opitutus sp. GAS368                |
| 0    | 4   | 0 P   | 203682  | Planctomycetes                     |
| 0    | 4   | 0 C   | 203683  | Planctomycetia                     |
| 0    | 4   | 0 O   | 2691355 | Gemmatales                         |
| 0    | 4   | 0 F   | 1914233 | Gemmataceae                        |
| 0    | 4   | 0 G   | 113     | Gemmata                            |
| 0    | 4   | 4 S   | 114     | Gemmata obscuriglobus              |
| 0.01 | 11  | 0 P   | 203691  | Spirochaetes                       |
| 0.01 | 11  | 0 C   | 203692  | Spirochaetia                       |
| 0    | 8   | 0 O   | 1643686 | Brachyspirales                     |
| 0    | 8   | 0 F   | 143786  | Brachyspiraceae                    |
| 0    | 8   | 0 G   | 29521   | Brachyspira                        |
| 0    | 8   | 8 S   | 52584   | Brachyspira pilosicoli             |
| 0    | 3   | 0 O   | 136     | Spirochaetales                     |

|      |      |        |         |                                          |
|------|------|--------|---------|------------------------------------------|
| 0    | 3    | 0 F    | 137     | Spirochaetaceae                          |
| 0    | 2    | 2 G    | 157     | Treponema                                |
| 0    | 1    | 0 G    | 146     | Spirochaeta                              |
| 0    | 1    | 0 S    | 46355   | Spirochaeta africana                     |
| 0    | 1    | 1 S1   | 889378  | Spirochaeta africana DSM 8902            |
| 0    | 8    | 0 P    | 32066   | Fusobacteria                             |
| 0    | 8    | 0 C    | 203490  | Fusobacteriia                            |
| 0    | 8    | 0 O    | 203491  | Fusobacteriales                          |
| 0    | 8    | 0 F    | 203492  | Fusobacteriaceae                         |
| 0    | 8    | 0 G    | 848     | Fusobacterium                            |
| 0    | 8    | 0 S    | 851     | Fusobacterium nucleatum                  |
| 0    | 8    | 8 S1   | 155615  | Fusobacterium nucleatum subsp. vincentii |
| 0    | 3    | 0 P    | 40117   | Nitrospirae                              |
| 0    | 3    | 0 C    | 203693  | Nitrospira                               |
| 0    | 3    | 0 O    | 189778  | Nitrospirales                            |
| 0    | 3    | 0 F    | 189779  | Nitrospiraceae                           |
| 0    | 3    | 0 G    | 1234    | Nitrospira                               |
| 0    | 3    | 3 S    | 42253   | Nitrospira moscoviensis                  |
| 0    | 2    | 0 D1   | 2323    | Bacteria incertae sedis                  |
| 0    | 2    | 0 D2   | 1783234 | Bacteria candidate phyla                 |
| 0    | 2    | 0 D3   | 95901   | Candidatus Dependitiae                   |
| 0    | 2    | 0 C    | 2497643 | Candidatus Babeliae                      |
| 0    | 2    | 0 O    | 2497644 | Candidatus Babeliales                    |
| 0    | 2    | 0 F    | 2497645 | Candidatus Babeliaceae                   |
| 0    | 2    | 0 G    | 1551504 | Candidatus Babela                        |
| 0    | 2    | 2 S    | 673862  | Candidatus Babela massiliensis           |
| 1.58 | 2844 | 21 D   | 2759    | Eukaryota                                |
| 1.35 | 2424 | 0 D1   | 33154   | Opisthokonta                             |
| 0.86 | 1553 | 0 K    | 4751    | Fungi                                    |
| 0.86 | 1553 | 0 K1   | 451864  | Dikarya                                  |
| 0.86 | 1541 | 0 P    | 5204    | Basidiomycota                            |
| 0.86 | 1541 | 1 P1   | 452284  | Ustilaginomycotina                       |
| 0.84 | 1519 | 0 C    | 1538075 | Malasseziomycetes                        |
| 0.84 | 1519 | 0 O    | 162474  | Malasseziales                            |
| 0.84 | 1519 | 0 F    | 742845  | Malasseziaceae                           |
| 0.84 | 1519 | 0 G    | 55193   | Malassezia                               |
| 0.84 | 1519 | 1519 S | 76775   | Malassezia restricta                     |
| 0.01 | 21   | 0 C    | 5257    | Ustilaginomycetes                        |
| 0.01 | 21   | 0 O    | 5267    | Ustilaginales                            |
| 0.01 | 21   | 0 F    | 5268    | Ustilaginaceae                           |
| 0.01 | 17   | 0 G    | 63265   | Sporisorium                              |
| 0.01 | 17   | 17 S   | 280036  | Sporisorium graminicola                  |
| 0    | 4    | 0 G    | 5269    | Ustilago                                 |
| 0    | 4    | 0 S    | 5270    | Ustilago maydis                          |
| 0    | 4    | 4 S1   | 237631  | Ustilago maydis 521                      |
| 0.01 | 12   | 0 P    | 4890    | Ascomycota                               |
| 0.01 | 12   | 0 P1   | 716545  | saccharomyceta                           |
| 0    | 9    | 0 P2   | 147537  | Saccharomycotina                         |
| 0    | 9    | 0 C    | 4891    | Saccharomycetes                          |
| 0    | 9    | 0 O    | 4892    | Saccharomycetales                        |
| 0    | 7    | 0 F    | 766764  | Debaryomycetaceae                        |
| 0    | 7    | 0 G    | 4958    | Debaryomyces                             |
| 0    | 7    | 0 S    | 4959    | Debaryomyces hansenii                    |
| 0    | 7    | 7 S1   | 284592  | Debaryomyces hansenii CBS767             |
| 0    | 2    | 0 F    | 4893    | Saccharomycetaceae                       |
| 0    | 2    | 0 G    | 4930    | Saccharomyces                            |
| 0    | 2    | 0 S    | 4932    | Saccharomyces cerevisiae                 |
| 0    | 2    | 2 S1   | 559292  | Saccharomyces cerevisiae S288C           |
| 0    | 3    | 0 P2   | 147538  | Pezizomycotina                           |
| 0    | 3    | 0 P3   | 716546  | leotiomyceta                             |
| 0    | 2    | 0 P4   | 715989  | sordariomyceta                           |
| 0    | 1    | 0 C    | 147548  | Leotiomycetes                            |
| 0    | 1    | 0 O    | 5178    | Helotiales                               |
| 0    | 1    | 0 F    | 28983   | Sclerotiniaceae                          |
| 0    | 1    | 0 G    | 33196   | Botrytis                                 |
| 0    | 1    | 0 S    | 40559   | Botrytis cinerea                         |
| 0    | 1    | 1 S1   | 332648  | Botrytis cinerea B05.10                  |
| 0    | 1    | 0 C    | 147550  | Sordariomycetes                          |
| 0    | 1    | 0 C1   | 222543  | Hypocreomycetidae                        |
| 0    | 1    | 0 O    | 5125    | Hypocreales                              |
| 0    | 1    | 0 F    | 474942  | Ophiocordycipitaceae                     |
| 0    | 1    | 0 G    | 98402   | Drechmeria                               |
| 0    | 1    | 1 S    | 98403   | Drechmeria coniospora                    |
| 0    | 1    | 0 P4   | 715962  | dothideomyceta                           |
| 0    | 1    | 0 C    | 147541  | Dothideomycetes                          |
| 0    | 1    | 0 C1   | 451867  | Dothideomycetidae                        |
| 0    | 1    | 0 O    | 2726947 | Mycosphaerellales                        |
| 0    | 1    | 0 F    | 93133   | Mycosphaerellaceae                       |
| 0    | 1    | 0 G    | 29002   | Cercospora                               |
| 0    | 1    | 1 S    | 122368  | Cercospora beticola                      |
| 0.48 | 871  | 0 K    | 33208   | Metazoa                                  |
| 0.48 | 871  | 0 K1   | 6072    | Eumetazoa                                |
| 0.48 | 871  | 0 K2   | 33213   | Bilateria                                |
| 0.48 | 871  | 0 K3   | 33511   | Deuterostomia                            |
| 0.48 | 871  | 0 P    | 7711    | Chordata                                 |
| 0.48 | 871  | 0 P1   | 89593   | Craniata                                 |
| 0.48 | 871  | 0 P2   | 7742    | Vertebrata                               |
| 0.48 | 871  | 0 P3   | 7776    | Gnathostomata                            |
| 0.48 | 871  | 0 P4   | 117570  | Teleostomi                               |
| 0.48 | 871  | 0 P5   | 117571  | Euteleostomi                             |
| 0.48 | 871  | 0 P6   | 8287    | Sarcopterygii                            |
| 0.48 | 871  | 0 C    | 1338369 | Dipnotetrapodomorpha                     |
| 0.48 | 871  | 0 C1   | 32523   | Tetrapoda                                |
| 0.48 | 871  | 0 C2   | 32524   | Amniota                                  |
| 0.48 | 871  | 0 C    | 40674   | Mammalia                                 |
| 0.48 | 871  | 0 C1   | 32525   | Theria                                   |
| 0.48 | 871  | 0 C2   | 9347    | Eutheria                                 |
| 0.48 | 871  | 0 C3   | 1437010 | Boreoeutheria                            |
| 0.48 | 871  | 0 C4   | 314146  | Euarchontoglires                         |
| 0.48 | 871  | 0 O    | 9443    | Primates                                 |
| 0.48 | 871  | 0 O1   | 376913  | Haplorrhini                              |
| 0.48 | 871  | 0 O2   | 314293  | Simiiformes                              |
| 0.48 | 871  | 0 O3   | 9526    | Catarrhini                               |
| 0.48 | 871  | 0 O4   | 314295  | Hominoidea                               |

|      |     |       |         |                                |
|------|-----|-------|---------|--------------------------------|
| 0.48 | 871 | 0 F   | 9604    | Hominidae                      |
| 0.48 | 871 | 0 F1  | 207598  | Homininae                      |
| 0.48 | 871 | 0 G   | 9605    | Homo                           |
| 0.48 | 871 | 871 S | 9606    | Homo sapiens                   |
| 0.2  | 359 | 0 K   | 33090   | Viridiplantae                  |
| 0.2  | 359 | 0 P   | 35493   | Streptophyta                   |
| 0.2  | 359 | 0 P1  | 131221  | Streptophytina                 |
| 0.2  | 359 | 0 P2  | 3193    | Embryophyta                    |
| 0.2  | 355 | 0 P3  | 58023   | Tracheophyta                   |
| 0.2  | 355 | 0 P4  | 78536   | Euphyllophyta                  |
| 0.2  | 355 | 0 P5  | 58024   | Spermatophyta                  |
| 0.2  | 355 | 0 C   | 3398    | Magnoliopsida                  |
| 0.19 | 350 | 1 C1  | 1437183 | Mesangiospermae                |
| 0.1  | 185 | 0 C2  | 71240   | eudicotyledons                 |
| 0.1  | 185 | 0 C3  | 91827   | Gunneridae                     |
| 0.1  | 185 | 4 C4  | 1437201 | Pentapetalae                   |
| 0.07 | 124 | 0 C5  | 71275   | rosids                         |
| 0.06 | 110 | 3 C6  | 91835   | fabids                         |
| 0.05 | 84  | 0 O   | 72025   | Fabales                        |
| 0.05 | 84  | 0 F   | 3803    | Fabaceae                       |
| 0.05 | 84  | 0 F1  | 3814    | Papilionoideae                 |
| 0.05 | 84  | 0 F2  | 2231393 | 50 kb inversion clade          |
| 0.04 | 79  | 0 F3  | 2231382 | NPAAA clade                    |
| 0.04 | 78  | 0 F4  | 2233855 | indigoferoid/millettioid clade |
| 0.04 | 78  | 0 F5  | 163735  | Phaseoleae                     |
| 0.04 | 69  | 0 G   | 3846    | Glycine                        |
| 0.04 | 69  | 0 G1  | 1462606 | Glycine subgen. Soja           |
| 0.04 | 69  | 69 S  | 3848    | Glycine soja                   |
| 0    | 8   | 0 G   | 3820    | Cajanus                        |
| 0    | 8   | 8 S   | 3821    | Cajanus cajan                  |
| 0    | 1   | 0 G   | 3883    | Phaseolus                      |
| 0    | 1   | 1 S   | 3885    | Phaseolus vulgaris             |
| 0    | 1   | 0 F4  | 2233838 | Hologalegina                   |
| 0    | 1   | 0 F5  | 2233839 | IRL clade                      |
| 0    | 1   | 0 F6  | 163742  | Trifolieae                     |
| 0    | 1   | 0 G   | 3877    | Medicago                       |
| 0    | 1   | 1 S   | 3880    | Medicago truncatula            |
| 0    | 5   | 0 F3  | 2231387 | dalbergioids sensu lato        |
| 0    | 5   | 0 F4  | 163725  | Dalbergieae                    |
| 0    | 5   | 0 F5  | 2231390 | Pterocarpus clade              |
| 0    | 5   | 5 G   | 3817    | Arachis                        |
| 0.01 | 13  | 0 O   | 71239   | Cucurbitales                   |
| 0.01 | 13  | 3 F   | 3650    | Cucurbitaceae                  |
| 0    | 7   | 0 F1  | 1003878 | Cucurbitaeae                   |
| 0    | 7   | 0 G   | 3660    | Cucurbita                      |
| 0    | 7   | 0 S   | 3663    | Cucurbita pepo                 |
| 0    | 7   | 7 S1  | 3664    | Cucurbita pepo subsp. pepo     |
| 0    | 3   | 0 F1  | 1003877 | Benincaseae                    |
| 0    | 3   | 0 G   | 102210  | Benincasa                      |
| 0    | 3   | 3 S   | 102211  | Benincasa hispida              |
| 0    | 5   | 0 O   | 3502    | Fagales                        |
| 0    | 5   | 0 F   | 3503    | Fagaceae                       |
| 0    | 5   | 0 G   | 3511    | Quercus                        |
| 0    | 5   | 5 S   | 97700   | Quercus lobata                 |
| 0    | 5   | 0 O   | 3744    | Rosales                        |
| 0    | 5   | 0 F   | 3745    | Rosaceae                       |
| 0    | 5   | 0 F1  | 171638  | Rosoideae                      |
| 0    | 5   | 0 F2  | 721789  | Potentilleae                   |
| 0    | 5   | 0 F3  | 1184124 | Fragariinae                    |
| 0    | 5   | 0 G   | 3746    | Fragaria                       |
| 0    | 5   | 0 S   | 57918   | Fragaria vesca                 |
| 0    | 5   | 5 S1  | 101020  | Fragaria vesca subsp. vesca    |
| 0.01 | 14  | 0 C6  | 91836   | malvids                        |
| 0    | 5   | 0 O   | 41937   | Sapindales                     |
| 0    | 5   | 0 F   | 23513   | Rutaceae                       |
| 0    | 5   | 0 F1  | 1728959 | Aurantioideae                  |
| 0    | 5   | 0 G   | 2706    | Citrus                         |
| 0    | 5   | 5 S   | 2711    | Citrus sinensis                |
| 0    | 3   | 0 O   | 3699    | Brassicales                    |
| 0    | 3   | 0 F   | 3700    | Brassicaceae                   |
| 0    | 2   | 0 F1  | 981071  | Brassicaceae                   |
| 0    | 2   | 2 G   | 3705    | Brassica                       |
| 0    | 1   | 0 F1  | 980083  | Camelineae                     |
| 0    | 1   | 0 G   | 71323   | Camelina                       |
| 0    | 1   | 1 S   | 90675   | Camelina sativa                |
| 0    | 3   | 0 O   | 41938   | Malvales                       |
| 0    | 3   | 0 F   | 3629    | Malvaceae                      |
| 0    | 2   | 0 F1  | 214907  | Malvoideae                     |
| 0    | 2   | 1 G   | 3633    | Gossypium                      |
| 0    | 1   | 1 S   | 29730   | Gossypium raimondii            |
| 0    | 1   | 0 F1  | 214909  | Byttnerioideae                 |
| 0    | 1   | 0 G   | 3640    | Theobroma                      |
| 0    | 1   | 1 S   | 3641    | Theobroma cacao                |
| 0    | 3   | 0 O   | 41944   | Myrtales                       |
| 0    | 2   | 0 F   | 3931    | Myrtaceae                      |
| 0    | 2   | 0 F1  | 1699513 | Myrtoideae                     |
| 0    | 2   | 0 F2  | 1699524 | Eucalypteae                    |
| 0    | 2   | 0 G   | 3932    | Eucalyptus                     |
| 0    | 2   | 2 S   | 71139   | Eucalyptus grandis             |
| 0    | 1   | 0 F   | 3928    | Lythraceae                     |
| 0    | 1   | 0 G   | 22662   | Punica                         |
| 0    | 1   | 1 S   | 22663   | Punica granatum                |
| 0.03 | 57  | 0 C5  | 71274   | asterids                       |
| 0.03 | 50  | 0 C6  | 91888   | lamiids                        |
| 0.03 | 50  | 0 O   | 4069    | Solanales                      |
| 0.03 | 50  | 0 F   | 4070    | Solanaceae                     |
| 0.03 | 50  | 6 F1  | 424551  | Solanoideae                    |
| 0.02 | 41  | 0 F2  | 424564  | Capsiceae                      |
| 0.02 | 41  | 0 G   | 4071    | Capsicum                       |
| 0.02 | 41  | 41 S  | 4072    | Capsicum annuum                |
| 0    | 3   | 0 F2  | 424574  | Solaneae                       |
| 0    | 3   | 0 G   | 4107    | Solanum                        |
| 0    | 3   | 3 G1  | 49274   | Solanum subgen. Lycopersicon   |
| 0    | 7   | 0 C6  | 91882   | campanulids                    |

|      |     |       |         |                                       |
|------|-----|-------|---------|---------------------------------------|
| 0    | 4   | 0 O   | 4209    | Asterales                             |
| 0    | 4   | 0 F   | 4210    | Asteraceae                            |
| 0    | 2   | 0 F1  | 102804  | Asteroideae                           |
| 0    | 2   | 0 F2  | 911341  | Heliantheae alliance                  |
| 0    | 2   | 0 F3  | 102814  | Heliantheae                           |
| 0    | 2   | 0 G   | 4231    | Helianthus                            |
| 0    | 2   | 2 S   | 4232    | Helianthus annuus                     |
| 0    | 2   | 0 F1  | 219103  | Carduoideae                           |
| 0    | 2   | 0 F2  | 102818  | Cardueae                              |
| 0    | 2   | 0 F3  | 742010  | Carduinae                             |
| 0    | 2   | 0 G   | 4264    | Cynara                                |
| 0    | 2   | 0 S   | 4265    | Cynara cardunculus                    |
| 0    | 2   | 0 S1  | 309979  | Cynara cardunculus subsp. cardunculus |
| 0    | 2   | 2 S2  | 59895   | Cynara cardunculus var. scolymus      |
| 0    | 3   | 0 O   | 4036    | Apiales                               |
| 0    | 3   | 0 O1  | 364270  | Apiineae                              |
| 0    | 3   | 0 F   | 4037    | Apiaceae                              |
| 0    | 3   | 0 F1  | 241778  | Apiioideae                            |
| 0    | 3   | 0 F2  | 241789  | Scandiceae                            |
| 0    | 3   | 0 F3  | 241799  | Daucinae                              |
| 0    | 3   | 0 G   | 4038    | Daucus                                |
| 0    | 3   | 0 G1  | 1873447 | Daucus sect. Daucus                   |
| 0    | 3   | 0 S   | 4039    | Daucus carota                         |
| 0    | 3   | 3 S1  | 79200   | Daucus carota subsp. sativus          |
| 0.07 | 126 | 0 C2  | 4447    | Liliopsida                            |
| 0.07 | 126 | 0 C3  | 1437197 | Petrosaviidae                         |
| 0.07 | 126 | 2 C4  | 4734    | commelinids                           |
| 0.03 | 57  | 0 O   | 4618    | Zingiberales                          |
| 0.03 | 57  | 0 F   | 4637    | Musaceae                              |
| 0.03 | 57  | 0 G   | 4640    | Musa                                  |
| 0.03 | 57  | 0 S   | 4641    | Musa acuminata                        |
| 0.03 | 57  | 57 S1 | 214687  | Musa acuminata subsp. malaccensis     |
| 0.03 | 51  | 0 O   | 38820   | Poales                                |
| 0.03 | 51  | 0 F   | 4479    | Poaceae                               |
| 0.03 | 47  | 0 F1  | 359160  | BOP clade                             |
| 0.02 | 36  | 0 F2  | 147368  | Pooideae                              |
| 0.02 | 34  | 0 F3  | 1648038 | Triticoideae                          |
| 0.02 | 34  | 0 F4  | 147389  | Triticeae                             |
| 0.02 | 34  | 9 F5  | 1648030 | Triticinae                            |
| 0.01 | 25  | 0 G   | 4564    | Triticum                              |
| 0.01 | 25  | 25 S  | 85692   | Triticum dicoccoides                  |
| 0    | 2   | 0 F3  | 2822797 | Stipodae                              |
| 0    | 2   | 0 F4  | 147385  | Brachypodieae                         |
| 0    | 2   | 0 G   | 15367   | Brachypodium                          |
| 0    | 2   | 2 S   | 15368   | Brachypodium distachyon               |
| 0.01 | 11  | 0 F2  | 147367  | Oryzoideae                            |
| 0.01 | 11  | 0 F3  | 147380  | Oryzeae                               |
| 0.01 | 11  | 0 F4  | 1648021 | Oryzinae                              |
| 0.01 | 11  | 0 G   | 4527    | Oryza                                 |
| 0.01 | 11  | 0 S   | 4530    | Oryza sativa                          |
| 0.01 | 11  | 11 S1 | 39947   | Oryza sativa Japonica Group           |
| 0    | 4   | 0 F1  | 147370  | PACMAD clade                          |
| 0    | 4   | 0 F2  | 147369  | Panicoideae                           |
| 0    | 3   | 0 F3  | 1648033 | Andropogonodae                        |
| 0    | 3   | 0 F4  | 147429  | Andropogoneae                         |
| 0    | 3   | 0 F5  | 1648029 | Tripsacinae                           |
| 0    | 3   | 0 G   | 4575    | Zea                                   |
| 0    | 3   | 3 S   | 4577    | Zea mays                              |
| 0    | 1   | 0 F3  | 1648036 | Panicodae                             |
| 0    | 1   | 0 F4  | 147428  | Paniceae                              |
| 0    | 1   | 0 F5  | 1293365 | Panicinae                             |
| 0    | 1   | 0 G   | 4539    | Panicum                               |
| 0    | 1   | 0 G1  | 2100772 | Panicum sect. Panicum                 |
| 0    | 1   | 1 S   | 206008  | Panicum hallii                        |
| 0.01 | 16  | 0 O   | 40551   | Arecales                              |
| 0.01 | 16  | 0 F   | 4710    | Arecaceae                             |
| 0.01 | 16  | 0 F1  | 169697  | Arecoideae                            |
| 0.01 | 16  | 0 F2  | 169705  | Cocoseae                              |
| 0.01 | 16  | 0 F3  | 169729  | Elaeidiinae                           |
| 0.01 | 16  | 0 G   | 51952   | Elaeis                                |
| 0.01 | 16  | 16 S  | 51953   | Elaeis guineensis                     |
| 0.02 | 38  | 0 O   | 41768   | Ranunculales                          |
| 0.02 | 38  | 0 F   | 3465    | Papaveraceae                          |
| 0.02 | 38  | 0 F1  | 1462614 | Papaveroideae                         |
| 0.02 | 38  | 0 G   | 3468    | Papaver                               |
| 0.02 | 38  | 38 S  | 3469    | Papaver somniferum                    |
| 0    | 5   | 0 O   | 261007  | Nymphaeales                           |
| 0    | 5   | 0 F   | 4410    | Nymphaeaceae                          |
| 0    | 5   | 0 G   | 4418    | Nymphaea                              |
| 0    | 5   | 5 S   | 210225  | Nymphaea colorata                     |
| 0    | 4   | 0 P3  | 3208    | Bryophyta                             |
| 0    | 4   | 0 P4  | 404260  | Bryophytina                           |
| 0    | 4   | 0 C   | 3214    | Bryopsida                             |
| 0    | 4   | 0 C1  | 114656  | Funariidae                            |
| 0    | 4   | 0 O   | 3215    | Funariales                            |
| 0    | 4   | 0 F   | 3216    | Funariaceae                           |
| 0    | 4   | 0 G   | 37414   | Physcomitrium                         |
| 0    | 4   | 4 S   | 3218    | Physcomitrium patens                  |
| 0.02 | 35  | 0 D1  | 2698737 | Sar                                   |
| 0.02 | 35  | 0 D2  | 33630   | Alveolata                             |
| 0.02 | 35  | 0 P   | 5794    | Apicomplexa                           |
| 0.02 | 33  | 0 C   | 1280412 | Conoidasida                           |
| 0.02 | 33  | 0 C1  | 5796    | Coccidia                              |
| 0.02 | 33  | 0 O   | 75739   | Eucoccidiorida                        |
| 0.02 | 33  | 0 O1  | 423054  | Eimeriorina                           |
| 0.02 | 33  | 0 F   | 5809    | Sarcocystidae                         |
| 0.02 | 33  | 0 G   | 5810    | Toxoplasma                            |
| 0.02 | 33  | 0 S   | 5811    | Toxoplasma gondii                     |
| 0.02 | 33  | 33 S1 | 508771  | Toxoplasma gondii ME49                |
| 0    | 2   | 0 C   | 422676  | Aconoidasida                          |
| 0    | 2   | 0 O   | 5863    | Piroplasmida                          |
| 0    | 2   | 0 F   | 32594   | Babesiidae                            |
| 0    | 2   | 0 G   | 5864    | Babesia                               |
| 0    | 2   | 2 S   | 5866    | Babesia bigemina                      |



|      |     |       |         |                                            |
|------|-----|-------|---------|--------------------------------------------|
| 0    | 4   | 0 D1  | 2611352 | Discoba                                    |
| 0    | 4   | 0 P   | 33682   | Euglenozoa                                 |
| 0    | 4   | 0 C   | 5653    | Kinetoplastea                              |
| 0    | 4   | 0 C1  | 2704647 | Metakinetoplastina                         |
| 0    | 4   | 0 O   | 2704949 | Trypanosomatida                            |
| 0    | 4   | 0 F   | 5654    | Trypanosomatidae                           |
| 0    | 4   | 0 F1  | 1286322 | Leishmaniinae                              |
| 0    | 4   | 0 G   | 5658    | Leishmania                                 |
| 0    | 4   | 0 G1  | 38568   | Leishmania                                 |
| 0    | 4   | 0 G2  | 38582   | Leishmania mexicana species complex        |
| 0    | 4   | 0 S   | 5665    | Leishmania mexicana                        |
| 0    | 4   | 4 S1  | 929439  | Leishmania mexicana MHOM/GT/2001/U1103     |
| 0    | 1   | 0 P   | 2763    | Rhodophyta                                 |
| 0    | 1   | 0 C   | 2797    | Bangiophyceae                              |
| 0    | 1   | 0 O   | 265318  | Cyanidiales                                |
| 0    | 1   | 0 F   | 265316  | Cyanidiaceae                               |
| 0    | 1   | 0 G   | 45156   | Cyanidioschyzon                            |
| 0    | 1   | 0 S   | 45157   | Cyanidioschyzon merolae                    |
| 0    | 1   | 1 S1  | 280699  | Cyanidioschyzon merolae strain 10D         |
| 0    | 7   | 0 D   | 2157    | Archaea                                    |
| 0    | 7   | 0 P   | 28890   | Euryarchaeota                              |
| 0    | 6   | 0 P1  | 2290931 | Stenosarchaea group                        |
| 0    | 3   | 0 C   | 183963  | Halobacteria                               |
| 0    | 3   | 0 O   | 1644055 | Haloferacales                              |
| 0    | 3   | 0 F   | 1644056 | Haloferacaceae                             |
| 0    | 2   | 0 G   | 1073986 | Halobellus                                 |
| 0    | 2   | 2 S   | 699433  | Halobellus limi                            |
| 0    | 1   | 0 G   | 376170  | Haloplanus                                 |
| 0    | 1   | 1 S   | 660522  | Haloplanus aerogenes                       |
| 0    | 3   | 0 C   | 224756  | Methanomicrobia                            |
| 0    | 3   | 0 O   | 94695   | Methanosarcinales                          |
| 0    | 3   | 0 F   | 143067  | Methanotrichaceae                          |
| 0    | 3   | 0 G   | 2222    | Methanothrix                               |
| 0    | 3   | 0 S   | 2223    | Methanothrix soehngenii                    |
| 0    | 3   | 3 S1  | 990316  | Methanothrix soehngenii GP6                |
| 0    | 1   | 0 P1  | 2283794 | Methanomada group                          |
| 0    | 1   | 0 C   | 183925  | Methanobacteria                            |
| 0    | 1   | 0 O   | 2158    | Methanobacteriales                         |
| 0    | 1   | 0 F   | 2159    | Methanobacteriaceae                        |
| 0    | 1   | 0 G   | 2172    | Methanobrevibacter                         |
| 0    | 1   | 1 S   | 2173    | Methanobrevibacter smithii                 |
| 0.48 | 859 | 0 D   | 10239   | Viruses                                    |
| 0.47 | 854 | 0 D1  | 2731341 | Duplodnaviria                              |
| 0.47 | 854 | 0 D2  | 2731360 | Heunggongvirae                             |
| 0.47 | 854 | 0 P   | 2731618 | Uroviricota                                |
| 0.47 | 854 | 0 C   | 2731619 | Caudoviricetes                             |
| 0.47 | 854 | 0 O   | 28883   | Caudovirales                               |
| 0.37 | 665 | 0 F   | 10744   | Podoviridae                                |
| 0.37 | 665 | 0 F1  | 196895  | unclassified Podoviridae                   |
| 0.37 | 665 | 0 F2  | 1978007 | crAss-like viruses                         |
| 0.37 | 665 | 0 F3  | 2315857 | environmental samples                      |
| 0.37 | 665 | 665 S | 1211417 | uncultured crAssphage                      |
| 0.1  | 176 | 0 F   | 10699   | Siphoviridae                               |
| 0.08 | 141 | 20 G  | 1623305 | Skunavirus                                 |
| 0.06 | 117 | 56 G1 | 2050979 | unclassified Skunavirus                    |
| 0    | 6   | 6 S   | 2029658 | Lactococcus phage 05601                    |
| 0    | 4   | 4 S   | 2675246 | Lactococcus phage CHPC129                  |
| 0    | 4   | 4 S   | 2029674 | Lactococcus phage 96401                    |
| 0    | 4   | 4 S   | 2029664 | Lactococcus phage 51701                    |
| 0    | 3   | 3 S   | 2029662 | Lactococcus phage 38503                    |
| 0    | 3   | 3 S   | 1636570 | Lactococcus phage 936 group phage Phi5.12  |
| 0    | 3   | 3 S   | 1636566 | Lactococcus phage 936 group phage Phi4.2   |
| 0    | 2   | 2 S   | 2675257 | Lactococcus phage CHPC965                  |
| 0    | 2   | 2 S   | 2029672 | Lactococcus phage 79201                    |
| 0    | 2   | 2 S   | 2029671 | Lactococcus phage 66901                    |
| 0    | 2   | 2 S   | 2029668 | Lactococcus phage 62601                    |
| 0    | 2   | 2 S   | 2029666 | Lactococcus phage 56301                    |
| 0    | 2   | 2 S   | 2029661 | Lactococcus phage 37201                    |
| 0    | 2   | 2 S   | 2029659 | Lactococcus phage 16802                    |
| 0    | 2   | 2 S   | 1874593 | Lactococcus phage i0139                    |
| 0    | 2   | 2 S   | 1636573 | Lactococcus phage 936 group phage PhiB1127 |
| 0    | 1   | 1 S   | 39838   | Lactococcus phage 936                      |
| 0    | 1   | 1 S   | 2675256 | Lactococcus phage CHPC964                  |
| 0    | 1   | 1 S   | 2675251 | Lactococcus phage CHPC52                   |
| 0    | 1   | 1 S   | 1636560 | Lactococcus phage 936 group phage Phi155   |
| 0    | 1   | 1 S   | 1636576 | Lactococcus phage 936 group phage PhiE1127 |
| 0    | 1   | 1 S   | 2675250 | Lactococcus phage CHPC362                  |
| 0    | 1   | 1 S   | 2662298 | Lactococcus phage P656                     |
| 0    | 1   | 1 S   | 2029675 | Lactococcus phage 96403                    |
| 0    | 1   | 1 S   | 213777  | Lactococcus lactis phage p272              |
| 0    | 1   | 1 S   | 1636583 | Lactococcus phage 936 group phage PhiLj    |
| 0    | 1   | 1 S   | 213782  | Lactococcus phage fd13                     |
| 0    | 1   | 1 S   | 1262537 | Lactococcus phage P680                     |
| 0    | 1   | 1 S   | 1636724 | Lactococcus phage 936 group phage PhiA.16  |
| 0    | 1   | 1 S   | 1289467 | Lactococcus phage CaseusLM1                |
| 0    | 1   | 1 S   | 2029660 | Lactococcus phage 30804                    |
| 0    | 1   | 1 S   | 2027272 | Lactococcus phage LP0903                   |
| 0    | 2   | 2 S   | 287412  | Lactococcus virus S14                      |
| 0    | 2   | 2 S   | 665883  | Lactococcus virus CB13                     |
| 0.02 | 28  | 22 G  | 1982251 | Pahexavirus                                |
| 0    | 3   | 0 S   | 1982287 | Propionibacterium virus PHL114L00          |
| 0    | 3   | 3 S1  | 1235656 | Propionibacterium phage PHL114L00          |
| 0    | 2   | 0 S   | 1982297 | Propionibacterium virus PHL171M01          |
| 0    | 2   | 2 S1  | 1500827 | Propionibacterium phage PHL171M01          |
| 0    | 1   | 0 S   | 1982282 | Propionibacterium virus PHL092M00          |
| 0    | 1   | 1 S1  | 1500813 | Propionibacterium phage PHL092M00          |
| 0    | 7   | 3 F1  | 196894  | unclassified Siphoviridae                  |
| 0    | 3   | 3 S   | 1105171 | Bacteroides phage B124-14                  |
| 0    | 1   | 1 S   | 881953  | Lactococcus phage 949                      |
| 0.01 | 13  | 0 F   | 10662   | Myoviridae                                 |
| 0.01 | 12  | 0 F1  | 196896  | unclassified Myoviridae                    |
| 0.01 | 12  | 12 S  | 12402   | Streptococcus phage EJ-1                   |
| 0    | 1   | 0 G   | 2733134 | Taranisvirus                               |
| 0    | 1   | 0 S   | 2734146 | Faecalibacterium virus Taranis             |

|   |   |      |         |                                                   |
|---|---|------|---------|---------------------------------------------------|
| 0 | 1 | 1 S1 | 2070186 | Faecalibacterium phage FP_Taranis                 |
| 0 | 5 | 0 D1 | 2731342 | Monodnaviria                                      |
| 0 | 5 | 0 K  | 2732092 | Shotokuvirae                                      |
| 0 | 5 | 0 P  | 2732415 | Cossaviricota                                     |
| 0 | 5 | 0 C  | 2732421 | Papovaviricetes                                   |
| 0 | 5 | 0 O  | 2732532 | Sepolyvirales                                     |
| 0 | 5 | 0 F  | 151341  | Polyomaviridae                                    |
| 0 | 5 | 0 G  | 1891713 | Alphapolyomavirus                                 |
| 0 | 5 | 0 S  | 1891727 | Human polyomavirus 8                              |
| 0 | 5 | 5 S1 | 862909  | Trichodysplasia spinulosa-associated polyomavirus |

Table S5-3. NC2\_taxa

|       |      |        |         |                                             |
|-------|------|--------|---------|---------------------------------------------|
| 54.1  | 5029 | 5029 U | 0       | unclassified                                |
| 45.9  | 4267 | 99 R   | 1       | root                                        |
| 44.83 | 4167 | 5 R1   | 131567  | cellular organisms                          |
| 42.99 | 3996 | 45 D   | 2       | Bacteria                                    |
| 19.95 | 1855 | 7 P    | 1224    | Proteobacteria                              |
| 8.85  | 823  | 0 C    | 28216   | Betaproteobacteria                          |
| 8.84  | 822  | 22 O   | 80840   | Burkholderiales                             |
| 7.99  | 743  | 6 F    | 80864   | Comamonadaceae                              |
| 7.85  | 730  | 451 G  | 80865   | Delftia                                     |
| 2.09  | 194  | 194 S  | 558537  | Delftia lacustris                           |
| 0.77  | 72   | 72 S   | 180282  | Delftia tsuruhatensis                       |
| 0.12  | 11   | 11 S   | 80866   | Delftia acidovorans                         |
| 0.02  | 2    | 0 G1   | 2613839 | unclassified Delftia                        |
| 0.01  | 1    | 1 S    | 742013  | Delftia sp. Cs1-4                           |
| 0.01  | 1    | 1 S    | 1920191 | Delftia sp. HK171                           |
| 0.03  | 3    | 0 G    | 201096  | Alicyclophilus                              |
| 0.03  | 3    | 0 S    | 179636  | Alicyclophilus denitrificans                |
| 0.03  | 3    | 3 S1   | 596154  | Alicyclophilus denitrificans K601           |
| 0.02  | 2    | 0 G    | 215579  | Schlegelella                                |
| 0.02  | 2    | 2 S    | 215580  | Schlegelella thermodepolymerans             |
| 0.01  | 1    | 0 G    | 34072   | Variovorax                                  |
| 0.01  | 1    | 1 S    | 34073   | Variovorax paradoxus                        |
| 0.01  | 1    | 0 G    | 47420   | Hydrogenophaga                              |
| 0.01  | 1    | 1 S    | 1763535 | Hydrogenophaga crassostreae                 |
| 0.26  | 24   | 6 F    | 75682   | Oxalobacteraceae                            |
| 0.19  | 18   | 0 G    | 149698  | Massilia                                    |
| 0.12  | 11   | 0 G1   | 2609279 | unclassified Massilia                       |
| 0.09  | 8    | 8 S    | 2769491 | Massilia sp. LPB0304                        |
| 0.02  | 2    | 2 S    | 2765360 | Massilia sp. CCM 8941                       |
| 0.01  | 1    | 1 S    | 1707785 | Massilia sp. WG5                            |
| 0.05  | 5    | 5 S    | 871742  | Massilia flava                              |
| 0.01  | 1    | 1 S    | 321985  | Massilia lutea                              |
| 0.01  | 1    | 1 S    | 1141883 | Massilia putida                             |
| 0.19  | 18   | 11 F   | 119060  | Burkholderiaceae                            |
| 0.08  | 7    | 5 G    | 106589  | Cupriavidus                                 |
| 0.02  | 2    | 2 S    | 82633   | Cupriavidus pauculus                        |
| 0.12  | 11   | 0 F    | 995019  | Sutterellaceae                              |
| 0.12  | 11   | 0 G    | 40544   | Sutterella                                  |
| 0.12  | 11   | 11 S   | 40545   | Sutterella wadsworthensis                   |
| 0.03  | 3    | 0 F    | 506     | Alcaligenaceae                              |
| 0.03  | 3    | 1 G    | 517     | Bordetella                                  |
| 0.02  | 2    | 2 S    | 123899  | Bordetella trematum                         |
| 0.01  | 1    | 0 O1   | 224471  | Burkholderiales genera incertae sedis       |
| 0.01  | 1    | 1 G    | 32012   | Thiomonas                                   |
| 0.01  | 1    | 0 O    | 206389  | Rhodocyclales                               |
| 0.01  | 1    | 0 F    | 2008794 | Zoogloeaceae                                |
| 0.01  | 1    | 0 G    | 33057   | Thauera                                     |
| 0.01  | 1    | 1 S    | 96773   | Thauera chlorobenzoica                      |
| 7.87  | 732  | 18 C   | 28211   | Alphaproteobacteria                         |
| 5.02  | 467  | 0 O    | 204457  | Sphingomonadales                            |
| 4.99  | 464  | 15 F   | 41297   | Sphingomonadaceae                           |
| 4.59  | 427  | 19 G   | 13687   | Sphingomonas                                |
| 4.21  | 391  | 391 S  | 13689   | Sphingomonas paucimobilis                   |
| 0.05  | 5    | 0 G1   | 196159  | unclassified Sphingomonas                   |
| 0.05  | 5    | 5 S    | 2698679 | Sphingomonas sp. C33                        |
| 0.04  | 4    | 4 S    | 93064   | Sphingomonas koreensis                      |
| 0.03  | 3    | 3 S    | 152682  | Sphingomonas melonis                        |
| 0.03  | 3    | 0 S    | 397260  | Sphingomonas sanxanigenens                  |
| 0.03  | 3    | 3 S1   | 1123269 | Sphingomonas sanxanigenens DSM 19645 = NX02 |
| 0.02  | 2    | 2 S    | 2698828 | Sphingomonas lacunae                        |
| 0.13  | 12   | 3 G    | 165695  | Sphingobium                                 |
| 0.06  | 6    | 6 S    | 13690   | Sphingobium yanoikuyae                      |
| 0.03  | 3    | 3 S    | 135719  | Sphingobium amiense                         |
| 0.08  | 7    | 3 G    | 165696  | Novosphingobium                             |
| 0.02  | 2    | 2 S    | 158500  | Novosphingobium resinovorum                 |
| 0.02  | 2    | 0 G1   | 2644732 | unclassified Novosphingobium                |
| 0.02  | 2    | 2 S    | 164608  | Novosphingobium sp. KA1                     |
| 0.02  | 2    | 0 G    | 1649486 | Rhizorhabdus                                |
| 0.02  | 2    | 2 S    | 1850238 | Rhizorhabdus dicambivorans                  |
| 0.01  | 1    | 0 G    | 165697  | Sphingopyxis                                |
| 0.01  | 1    | 1 S    | 33050   | Sphingopyxis macrogoltabida                 |
| 0.03  | 3    | 0 F    | 335929  | Erythrobacteraceae                          |
| 0.03  | 3    | 0 F1   | 2800788 | Erythrobacter/Porphrobacter group           |
| 0.03  | 3    | 0 G    | 1041    | Erythrobacter                               |
| 0.03  | 3    | 0 G1   | 2633097 | unclassified Erythrobacter                  |
| 0.03  | 3    | 3 S    | 2785907 | Erythrobacter sp. A30-3                     |
| 1.91  | 178  | 1 O    | 356     | Hyphomicrobiales                            |
| 1.61  | 150  | 27 F   | 119045  | Methylobacteriaceae                         |
| 1.17  | 109  | 14 G   | 2282523 | Methyloburbum                               |
| 0.55  | 51   | 42 S   | 223967  | Methyloburbum populi                        |
| 0.1   | 9    | 9 S1   | 441620  | Methyloburbum populi BJ001                  |
| 0.47  | 44   | 7 S    | 408     | Methyloburbum extorquens                    |
| 0.29  | 27   | 27 S1  | 272630  | Methyloburbum extorquens AM1                |
| 0.11  | 10   | 10 S1  | 440085  | Methyloburbum extorquens CM4                |
| 0.15  | 14   | 1 G    | 407     | Methylobacterium                            |
| 0.11  | 10   | 4 G1   | 2615210 | unclassified Methylobacterium               |
| 0.06  | 6    | 6 S    | 2067957 | Methylobacterium sp. DM1                    |
| 0.02  | 2    | 2 S    | 270351  | Methylobacterium aquaticum                  |
| 0.01  | 1    | 1 S    | 2202825 | Methylobacterium durans                     |
| 0.11  | 10   | 0 F    | 82115   | Rhizobiaceae                                |
| 0.06  | 6    | 0 F1   | 227292  | Sinorhizobium/Ensifer group                 |
| 0.06  | 6    | 0 G    | 28105   | Sinorhizobium                               |
| 0.06  | 6    | 0 G1   | 663276  | Sinorhizobium fredii group                  |
| 0.06  | 6    | 6 S    | 380     | Sinorhizobium fredii                        |
| 0.04  | 4    | 0 F1   | 227290  | Rhizobium/Agrobacterium group               |
| 0.02  | 2    | 1 G    | 357     | Agrobacterium                               |
| 0.01  | 1    | 1 S    | 359     | Agrobacterium rhizogenes                    |
| 0.02  | 2    | 0 G    | 1525371 | Neorhizobium                                |
| 0.02  | 2    | 0 G1   | 2629175 | unclassified Neorhizobium                   |
| 0.02  | 2    | 2 S    | 1825976 | Neorhizobium sp. NCHU2750                   |
| 0.06  | 6    | 0 F    | 41294   | Bradyrhizobiaceae                           |
| 0.04  | 4    | 2 G    | 374     | Bradyrhizobium                              |
| 0.02  | 2    | 0 G1   | 2631580 | unclassified Bradyrhizobium                 |

|      |     |       |         |                                               |
|------|-----|-------|---------|-----------------------------------------------|
| 0.02 | 2   | 2 S   | 319017  | Bradyrhizobium sp. WSM471                     |
| 0.02 | 2   | 0 G   | 85413   | Bosea                                         |
| 0.02 | 2   | 0 G1  | 2653178 | unclassified Bosea                            |
| 0.02 | 2   | 2 S   | 1867715 | Bosea sp. Tri-49                              |
| 0.06 | 6   | 0 F   | 69277   | Phyllobacteriaceae                            |
| 0.06 | 6   | 6 G   | 68287   | Mesorhizobium                                 |
| 0.03 | 3   | 0 F   | 118882  | Brucellaceae                                  |
| 0.03 | 3   | 0 F1  | 2826938 | Brucella/Ochrobactrum group                   |
| 0.03 | 3   | 0 G   | 234     | Brucella                                      |
| 0.03 | 3   | 3 S   | 271865  | [Ochrobactrum] quorumnogens                   |
| 0.01 | 1   | 0 F   | 31993   | Methylocystaceae                              |
| 0.01 | 1   | 0 G   | 133     | Methylocystis                                 |
| 0.01 | 1   | 1 S   | 391905  | Methylocystis heyeri                          |
| 0.01 | 1   | 0 F   | 45401   | Hyphomicrobiaceae                             |
| 0.01 | 1   | 0 G   | 1484898 | Methyloceanibacter                            |
| 0.01 | 1   | 0 G1  | 2617503 | unclassified Methyloceanibacter               |
| 0.01 | 1   | 1 S   | 2170729 | Methyloceanibacter sp. wino2                  |
| 0.48 | 45  | 0 O   | 204455  | Rhodobacterales                               |
| 0.48 | 45  | 19 F  | 31989   | Rhodobacteraceae                              |
| 0.12 | 11  | 0 G   | 1060    | Rhodobacter                                   |
| 0.12 | 11  | 0 G1  | 196779  | unclassified Rhodobacter                      |
| 0.12 | 11  | 11 S  | 1850250 | Rhodobacter sp. LPB0142                       |
| 0.05 | 5   | 3 G   | 265     | Paracoccus                                    |
| 0.01 | 1   | 1 S   | 135740  | Paracoccus kondratievae                       |
| 0.01 | 1   | 0 G1  | 246570  | unclassified Paracoccus                       |
| 0.01 | 1   | 1 S   | 2500532 | Paracoccus sp. Arc7-R13                       |
| 0.04 | 4   | 0 G   | 366614  | Haematobacter                                 |
| 0.04 | 4   | 4 S   | 195105  | Haematobacter massiliensis                    |
| 0.02 | 2   | 0 G   | 1653176 | Cereibacter                                   |
| 0.02 | 2   | 2 S   | 1063    | Cereibacter sphaeroides                       |
| 0.02 | 2   | 0 G   | 74030   | Roseovarius                                   |
| 0.02 | 2   | 2 G1  | 2614913 | unclassified Roseovarius                      |
| 0.01 | 1   | 0 G   | 53945   | Octadecabacter                                |
| 0.01 | 1   | 0 S   | 53946   | Octadecabacter arcticus                       |
| 0.01 | 1   | 1 S1  | 391616  | Octadecabacter arcticus 238                   |
| 0.01 | 1   | 0 G   | 204456  | Gemmobacter                                   |
| 0.01 | 1   | 0 G1  | 2636157 | unclassified Gemmobacter                      |
| 0.01 | 1   | 1 S   | 2169400 | Gemmobacter sp. HYN0069                       |
| 0.24 | 22  | 0 O   | 204458  | Caulobacterales                               |
| 0.24 | 22  | 1 F   | 76892   | Caulobacteraceae                              |
| 0.19 | 18  | 1 G   | 41275   | Brevundimonas                                 |
| 0.16 | 15  | 0 G1  | 2622653 | unclassified Brevundimonas                    |
| 0.06 | 6   | 6 S   | 1532555 | Brevundimonas sp. DS20                        |
| 0.05 | 5   | 5 S   | 2752515 | Brevundimonas sp. AJA228-03                   |
| 0.02 | 2   | 2 S   | 2579977 | Brevundimonas sp. SGAr0440                    |
| 0.02 | 2   | 2 S   | 2774189 | Brevundimonas sp. LVF1                        |
| 0.02 | 2   | 2 S   | 293     | Brevundimonas diminuta                        |
| 0.03 | 3   | 1 G   | 75      | Caulobacter                                   |
| 0.02 | 2   | 0 G1  | 2648921 | unclassified Caulobacter                      |
| 0.02 | 2   | 2 S   | 69665   | Caulobacter sp. FWC26                         |
| 0.01 | 1   | 0 O   | 204441  | Rhodospirillales                              |
| 0.01 | 1   | 0 F   | 433     | Acetobacteraceae                              |
| 0.01 | 1   | 0 G   | 1654741 | Bombella                                      |
| 0.01 | 1   | 0 G1  | 2644098 | unclassified Bombella                         |
| 0.01 | 1   | 1 S   | 2697033 | Bombella sp. KACC 21507                       |
| 0.01 | 1   | 0 O   | 255473  | Parvularculales                               |
| 0.01 | 1   | 0 F   | 255474  | Parvularculaceae                              |
| 0.01 | 1   | 0 G   | 208215  | Parvularcula                                  |
| 0.01 | 1   | 0 S   | 208216  | Parvularcula bermudensis                      |
| 0.01 | 1   | 1 S1  | 314260  | Parvularcula bermudensis HTCC2503             |
| 3    | 279 | 0 C   | 1236    | Gamma proteobacteria                          |
| 1.96 | 182 | 2 O   | 135614  | Xanthomonadales                               |
| 1.94 | 180 | 0 F   | 32033   | Xanthomonadaceae                              |
| 1.93 | 179 | 31 G  | 40323   | Stenotrophomonas                              |
| 1.55 | 144 | 0 G1  | 995085  | Stenotrophomonas maltophilia group            |
| 1.55 | 144 | 137 S | 40324   | Stenotrophomonas maltophilia                  |
| 0.08 | 7   | 7 S1  | 391008  | Stenotrophomonas maltophilia R551-3           |
| 0.03 | 3   | 0 G1  | 196198  | unclassified Stenotrophomonas                 |
| 0.03 | 3   | 3 S   | 2282124 | Stenotrophomonas sp. ASS1                     |
| 0.01 | 1   | 1 S   | 128780  | Stenotrophomonas acidaminiphila               |
| 0.01 | 1   | 0 G   | 68      | Lysobacter                                    |
| 0.01 | 1   | 1 S   | 1324796 | Lysobacter lycopersici                        |
| 0.9  | 84  | 0 O   | 72274   | Pseudomonadales                               |
| 0.55 | 51  | 0 F   | 468     | Moraxellaceae                                 |
| 0.55 | 51  | 12 G  | 469     | Acinetobacter                                 |
| 0.16 | 15  | 15 S  | 28090   | Acinetobacter lwoffii                         |
| 0.12 | 11  | 0 S   | 52133   | Acinetobacter venetianus                      |
| 0.12 | 11  | 11 S1 | 1197884 | Acinetobacter venetianus VE-C3                |
| 0.08 | 7   | 7 S   | 40214   | Acinetobacter johnsonii                       |
| 0.04 | 4   | 0 G1  | 196816  | unclassified Acinetobacter                    |
| 0.03 | 3   | 3 S   | 2725684 | Acinetobacter sp. NEB149                      |
| 0.01 | 1   | 1 S   | 2004644 | Acinetobacter sp. WCHA45                      |
| 0.02 | 2   | 0 G1  | 909768  | Acinetobacter calcoaceticus/baumannii complex |
| 0.02 | 2   | 2 S   | 470     | Acinetobacter baumannii                       |
| 0.35 | 33  | 0 F   | 135621  | Pseudomonadaceae                              |
| 0.35 | 33  | 2 G   | 286     | Pseudomonas                                   |
| 0.22 | 20  | 0 G1  | 136841  | Pseudomonas aeruginosa group                  |
| 0.22 | 20  | 20 S  | 287     | Pseudomonas aeruginosa                        |
| 0.05 | 5   | 0 G1  | 136843  | Pseudomonas fluorescens group                 |
| 0.05 | 5   | 5 S   | 294     | Pseudomonas fluorescens                       |
| 0.03 | 3   | 3 S   | 157782  | Pseudomonas parafulva                         |
| 0.02 | 2   | 0 G1  | 136845  | Pseudomonas putida group                      |
| 0.01 | 1   | 1 S   | 303     | Pseudomonas putida                            |
| 0.01 | 1   | 0 S   | 47880   | Pseudomonas fulva                             |
| 0.01 | 1   | 1 S1  | 743720  | Pseudomonas fulva 12-X                        |
| 0.01 | 1   | 0 G1  | 196821  | unclassified Pseudomonas                      |
| 0.01 | 1   | 1 S   | 2083054 | Pseudomonas sp. LG1D9                         |
| 0.09 | 8   | 1 O   | 91347   | Enterobacterales                              |
| 0.08 | 7   | 3 F   | 543     | Enterobacteriaceae                            |
| 0.04 | 4   | 0 G   | 561     | Escherichia                                   |
| 0.04 | 4   | 4 S   | 562     | Escherichia coli                              |
| 0.04 | 4   | 0 O   | 135624  | Aeromonadales                                 |
| 0.04 | 4   | 0 F   | 84642   | Aeromonadaceae                                |
| 0.04 | 4   | 0 G   | 642     | Aeromonas                                     |

|       |      |       |         |                                                   |
|-------|------|-------|---------|---------------------------------------------------|
| 0.04  | 4    | 0 G1  | 257493  | unclassified Aeromonas                            |
| 0.04  | 4    | 4 S   | 1636607 | Aeromonas sp. ASNIH2                              |
| 0.01  | 1    | 0 O   | 135625  | Pasteurellales                                    |
| 0.01  | 1    | 0 F   | 712     | Pasteurellaceae                                   |
| 0.01  | 1    | 0 G   | 724     | Haemophilus                                       |
| 0.01  | 1    | 1 S   | 729     | Haemophilus parainfluenzae                        |
| 0.15  | 14   | 0 P1  | 68525   | delta/epsilon subdivisions                        |
| 0.11  | 10   | 0 C   | 28221   | Deltaproteobacteria                               |
| 0.08  | 7    | 0 O   | 29      | Myxococcales                                      |
| 0.08  | 7    | 0 O1  | 80811   | Cystobacterineae                                  |
| 0.06  | 6    | 0 F   | 31      | Myxococcaceae                                     |
| 0.06  | 6    | 0 G   | 83461   | Corallococcus                                     |
| 0.06  | 6    | 6 S   | 35      | Corallococcus macrosporus                         |
| 0.01  | 1    | 0 F   | 39      | Archangiaceae                                     |
| 0.01  | 1    | 0 G   | 40      | Stigmatella                                       |
| 0.01  | 1    | 0 S   | 41      | Stigmatella aurantiaca                            |
| 0.01  | 1    | 1 S1  | 378806  | Stigmatella aurantiaca DW4/3-1                    |
| 0.03  | 3    | 0 O   | 213115  | Desulfovibrionales                                |
| 0.03  | 3    | 0 F   | 194924  | Desulfovibrionaceae                               |
| 0.03  | 3    | 0 G   | 872     | Desulfovibrio                                     |
| 0.03  | 3    | 0 S   | 345370  | Desulfovibrio carbinoliphilus                     |
| 0.03  | 3    | 3 S1  | 694327  | Desulfovibrio carbinoliphilus subsp. oakridgensis |
| 0.04  | 4    | 0 C   | 29547   | Epsilonproteobacteria                             |
| 0.04  | 4    | 0 O   | 213849  | Campylobacteriales                                |
| 0.04  | 4    | 0 F   | 72294   | Campylobacteraceae                                |
| 0.04  | 4    | 0 G   | 194     | Campylobacter                                     |
| 0.04  | 4    | 4 S   | 195     | Campylobacter coli                                |
| 14.68 | 1365 | 0 D1  | 1783270 | FCB group                                         |
| 14.68 | 1365 | 0 D2  | 68336   | Bacteroidetes/Chlorobi group                      |
| 14.68 | 1365 | 1 P   | 976     | Bacteroidetes                                     |
| 14.09 | 1310 | 0 C   | 200643  | Bacteroidia                                       |
| 14.09 | 1310 | 110 O | 171549  | Bacteroidales                                     |
| 10.83 | 1007 | 0 F   | 815     | Bacteroidaceae                                    |
| 10.83 | 1007 | 93 G  | 816     | Bacteroides                                       |
| 6.81  | 633  | 633 S | 818     | Bacteroides thetaiotaomicron                      |
| 0.75  | 70   | 70 S  | 246787  | Bacteroides cellulosilyticus                      |
| 0.65  | 60   | 60 S  | 820     | Bacteroides uniformis                             |
| 0.43  | 40   | 40 S  | 28111   | Bacteroides eggertii                              |
| 0.4   | 37   | 9 G1  | 2646097 | unclassified Bacteroides                          |
| 0.11  | 10   | 10 S  | 2650157 | Bacteroides sp. HF-5287                           |
| 0.11  | 10   | 10 S  | 2785531 | Bacteroides sp. HF-162                            |
| 0.05  | 5    | 5 S   | 2528203 | Bacteroides sp. A1C1                              |
| 0.02  | 2    | 2 S   | 2755405 | Bacteroides sp. CACC 737                          |
| 0.01  | 1    | 1 S   | 2763022 | Bacteroides sp. M10                               |
| 0.38  | 35   | 35 S  | 817     | Bacteroides fragilis                              |
| 0.24  | 22   | 22 S  | 28116   | Bacteroides ovatus                                |
| 0.08  | 7    | 7 S   | 329854  | Bacteroides intestinalis                          |
| 0.05  | 5    | 5 S   | 47678   | Bacteroides caccae                                |
| 0.04  | 4    | 3 S   | 371601  | Bacteroides xylanisolvens                         |
| 0.01  | 1    | 1 S1  | 657309  | Bacteroides xylanisolvens XB1A                    |
| 0.01  | 1    | 1 S   | 1796613 | Bacteroides caecimuris                            |
| 1.38  | 128  | 0 O1  | 333046  | Bacteroidales incertae sedis                      |
| 1.38  | 128  | 15 G  | 909656  | Phocaeicola                                       |
| 0.73  | 68   | 63 S  | 357276  | Phocaeicola dorei                                 |
| 0.05  | 5    | 5 S1  | 997877  | Bacteroides dorei CL03T12C01                      |
| 0.46  | 43   | 43 S  | 821     | Phocaeicola vulgatus                              |
| 0.01  | 1    | 0 S   | 376805  | Phocaeicola salanitronis                          |
| 0.01  | 1    | 1 S1  | 667015  | Phocaeicola salanitronis DSM 18170                |
| 0.01  | 1    | 1 S   | 387090  | Phocaeicola coprophilus                           |
| 0.47  | 44   | 0 F   | 171550  | Rikenellaceae                                     |
| 0.47  | 44   | 0 G   | 239759  | Alistipes                                         |
| 0.32  | 30   | 0 S   | 328813  | Alistipes onderdonkii                             |
| 0.32  | 30   | 30 S1 | 2585117 | Alistipes onderdonkii subsp. vulgaris             |
| 0.06  | 6    | 6 S   | 2585118 | Alistipes communis                                |
| 0.04  | 4    | 0 S   | 214856  | Alistipes finegoldii                              |
| 0.04  | 4    | 4 S1  | 679935  | Alistipes finegoldii DSM 17242                    |
| 0.02  | 2    | 0 S   | 328814  | Alistipes shahii                                  |
| 0.02  | 2    | 2 S1  | 717959  | Alistipes shahii WAL 8301                         |
| 0.01  | 1    | 1 S   | 2585119 | Alistipes dispar                                  |
| 0.01  | 1    | 0 G1  | 2608932 | unclassified Alistipes                            |
| 0.01  | 1    | 1 S   | 2662363 | Alistipes sp. dk3624                              |
| 0.11  | 10   | 0 F   | 2005525 | Tannerellaceae                                    |
| 0.11  | 10   | 3 G   | 375288  | Parabacteroides                                   |
| 0.06  | 6    | 6 S   | 823     | Parabacteroides distasonis                        |
| 0.01  | 1    | 1 S   | 328812  | Parabacteroides goldsteinii                       |
| 0.1   | 9    | 0 F   | 1853231 | Odoribacteraceae                                  |
| 0.1   | 9    | 0 G   | 574697  | Butyrivimonas                                     |
| 0.08  | 7    | 7 S   | 544645  | Butyrivimonas virosa                              |
| 0.02  | 2    | 2 S   | 2093856 | Butyrivimonas faecalis                            |
| 0.01  | 1    | 0 F   | 171552  | Prevotellaceae                                    |
| 0.01  | 1    | 0 G   | 838     | Prevotella                                        |
| 0.01  | 1    | 1 S   | 1177574 | Prevotella jejuni                                 |
| 0.01  | 1    | 0 F   | 2005473 | Muribaculaceae                                    |
| 0.01  | 1    | 0 G   | 1918540 | Muribaculum                                       |
| 0.01  | 1    | 1 S   | 2530390 | Muribaculum gordoncarteri                         |
| 0.34  | 32   | 0 C   | 768503  | Cytophagia                                        |
| 0.34  | 32   | 0 O   | 768507  | Cytophagales                                      |
| 0.34  | 32   | 0 F   | 1853232 | Hymenobacteraceae                                 |
| 0.34  | 32   | 12 G  | 89966   | Hymenobacter                                      |
| 0.15  | 14   | 0 G1  | 2615202 | unclassified Hymenobacter                         |
| 0.12  | 11   | 11 S  | 2675878 | Hymenobacter sp. BRD128                           |
| 0.02  | 2    | 2 S   | 1356852 | Hymenobacter sp. APR13                            |
| 0.01  | 1    | 1 S   | 2584940 | Hymenobacter sp. DG01                             |
| 0.05  | 5    | 5 S   | 2607656 | Hymenobacter busanensis                           |
| 0.01  | 1    | 1 S   | 1385715 | Hymenobacter qilianensis                          |
| 0.24  | 22   | 0 C   | 117743  | Flavobacteriia                                    |
| 0.24  | 22   | 0 O   | 200644  | Flavobacteriales                                  |
| 0.24  | 22   | 0 F   | 2762318 | Weeksellaceae                                     |
| 0.19  | 18   | 0 F1  | 2782232 | Chryseobacterium group                            |
| 0.19  | 18   | 1 G   | 59732   | Chryseobacterium                                  |
| 0.08  | 7    | 7 S   | 246     | Chryseobacterium balustinum                       |
| 0.08  | 7    | 7 S   | 558152  | Chryseobacterium piperi                           |
| 0.03  | 3    | 0 G1  | 2593645 | unclassified Chryseobacterium                     |
| 0.03  | 3    | 3 S   | 2487065 | Chryseobacterium sp. G0201                        |

|      |     |       |         |                                                  |
|------|-----|-------|---------|--------------------------------------------------|
| 0.04 | 4   | 4 G   | 59734   | Empedobacter                                     |
| 7.86 | 731 | 3 D1  | 1783272 | Terrabacteria group                              |
| 5.78 | 537 | 0 P   | 201174  | Actinobacteria                                   |
| 5.66 | 526 | 33 C  | 1760    | Actinomycetia                                    |
| 2.8  | 260 | 0 O   | 85009   | Propionibacteriales                              |
| 2.47 | 230 | 4 F   | 31957   | Propionibacteriaceae                             |
| 2.38 | 221 | 0 G   | 1912216 | Cutibacterium                                    |
| 2.37 | 220 | 220 S | 1747    | Cutibacterium acnes                              |
| 0.01 | 1   | 1 S   | 33011   | Cutibacterium granulosum                         |
| 0.05 | 5   | 0 G   | 1743    | Propionibacterium                                |
| 0.04 | 4   | 4 S   | 1744    | Propionibacterium freudenreichii                 |
| 0.01 | 1   | 0 G1  | 2608905 | unclassified Propionibacterium                   |
| 0.01 | 1   | 1 S   | 671223  | Propionibacterium sp. oral taxon 193             |
| 0.32 | 30  | 3 F   | 85015   | Nocardioidaceae                                  |
| 0.27 | 25  | 0 G   | 1839    | Nocardioides                                     |
| 0.12 | 11  | 11 S  | 2518370 | Nocardioides euryhalodurans                      |
| 0.08 | 7   | 7 S   | 433659  | Nocardioides mesophilus                          |
| 0.08 | 7   | 0 G1  | 2615069 | unclassified Nocardioides                        |
| 0.04 | 4   | 4 S   | 2763008 | Nocardioides sp. zg-1228                         |
| 0.02 | 2   | 2 S   | 110319  | Nocardioides sp. CF8                             |
| 0.01 | 1   | 1 S   | 2714939 | Nocardioides sp. HDW12B                          |
| 0.02 | 2   | 0 G   | 86795   | Marmoricola                                      |
| 0.02 | 2   | 2 S   | 642780  | Marmoricola scoriae                              |
| 1.42 | 132 | 5 O   | 85006   | Micrococcales                                    |
| 0.71 | 66  | 0 F   | 85023   | Microbacteriaceae                                |
| 0.66 | 61  | 16 G  | 33882   | Microbacterium                                   |
| 0.17 | 16  | 16 S  | 57043   | Microbacterium esteraromaticum                   |
| 0.11 | 10  | 10 S  | 162426  | Microbacterium hominis                           |
| 0.09 | 8   | 0 G1  | 2609290 | unclassified Microbacterium                      |
| 0.05 | 5   | 5 S   | 2782166 | Microbacterium sp. A18JL241                      |
| 0.02 | 2   | 2 S   | 2048898 | Microbacterium sp. Y-01                          |
| 0.01 | 1   | 1 S   | 2603598 | Microbacterium sp. CBA3102                       |
| 0.05 | 5   | 5 S   | 104336  | Microbacterium foliorum                          |
| 0.03 | 3   | 3 S   | 273677  | Microbacterium oleivorans                        |
| 0.02 | 2   | 2 S   | 69362   | Microbacterium schleiferi                        |
| 0.01 | 1   | 1 S   | 936337  | Microbacterium amylolyticum                      |
| 0.02 | 2   | 0 G   | 110932  | Leifsonia                                        |
| 0.02 | 2   | 1 G1  | 2663824 | unclassified Leifsonia                           |
| 0.01 | 1   | 1 S   | 1798223 | Leifsonia sp. 21MFCrub1.1                        |
| 0.01 | 1   | 0 G   | 2034    | Curtobacterium                                   |
| 0.01 | 1   | 0 S   | 2035    | Curtobacterium flaccumfaciens                    |
| 0.01 | 1   | 1 S1  | 138532  | Curtobacterium flaccumfaciens pv. flaccumfaciens |
| 0.01 | 1   | 0 G   | 33877   | Agromyces                                        |
| 0.01 | 1   | 0 G1  | 2639701 | unclassified Agromyces                           |
| 0.01 | 1   | 1 S   | 2498704 | Agromyces sp. LHK192                             |
| 0.01 | 1   | 0 G   | 235888  | Salinibacterium                                  |
| 0.01 | 1   | 0 G1  | 2632331 | unclassified Salinibacterium                     |
| 0.01 | 1   | 1 S   | 2708084 | Salinibacterium sp. ZJ70                         |
| 0.3  | 28  | 0 F   | 2805590 | Ornithinimicrobiaceae                            |
| 0.2  | 19  | 0 G   | 265976  | Serinicoccus                                     |
| 0.2  | 19  | 19 S  | 1078471 | Serinicoccus profundi                            |
| 0.1  | 9   | 0 G   | 125287  | Ornithinimicrobium                               |
| 0.06 | 6   | 6 S   | 1288636 | Ornithinimicrobium flavum                        |
| 0.03 | 3   | 0 G1  | 2615080 | unclassified Ornithinimicrobium                  |
| 0.02 | 2   | 2 S   | 2594265 | Ornithinimicrobium sp. H23M54                    |
| 0.01 | 1   | 1 S   | 2508882 | Ornithinimicrobium sp. HY006                     |
| 0.28 | 26  | 0 F   | 1268    | Micrococcaceae                                   |
| 0.19 | 18  | 10 G  | 1269    | Micrococcus                                      |
| 0.09 | 8   | 8 S   | 1270    | Micrococcus luteus                               |
| 0.08 | 7   | 0 G   | 1663    | Arthrobacter                                     |
| 0.04 | 4   | 4 S   | 37921   | Arthrobacter agilis                              |
| 0.03 | 3   | 0 G1  | 235627  | unclassified Arthrobacter                        |
| 0.03 | 3   | 3 S   | 2575374 | Arthrobacter sp. 24S4-2                          |
| 0.01 | 1   | 0 G   | 57493   | Kocuria                                          |
| 0.01 | 1   | 1 S   | 72000   | Kocuria rhizophila                               |
| 0.04 | 4   | 0 F   | 85019   | Brevibacteriaceae                                |
| 0.04 | 4   | 1 G   | 1696    | Brevibacterium                                   |
| 0.03 | 3   | 3 S   | 629680  | Brevibacterium sandarakinum                      |
| 0.03 | 3   | 0 F   | 85021   | Intrasporangiaceae                               |
| 0.03 | 3   | 0 G   | 53457   | Janibacter                                       |
| 0.03 | 3   | 3 S   | 53458   | Janibacter limosus                               |
| 0.58 | 54  | 0 O   | 85007   | Corynebacteriales                                |
| 0.33 | 31  | 0 F   | 1653    | Corynebacteriaceae                               |
| 0.33 | 31  | 0 G   | 1716    | Corynebacterium                                  |
| 0.13 | 12  | 12 S  | 43990   | Corynebacterium segmentosum                      |
| 0.11 | 10  | 0 S   | 1404244 | Corynebacterium glyciniphilum                    |
| 0.11 | 10  | 10 S1 | 1404245 | Corynebacterium glyciniphilum AJ 3170            |
| 0.06 | 6   | 6 S   | 1979527 | Corynebacterium kefirresidentii                  |
| 0.03 | 3   | 3 S   | 38304   | Corynebacterium tuberculostearicum               |
| 0.13 | 12  | 0 F   | 1762    | Mycobacteriaceae                                 |
| 0.08 | 7   | 5 G   | 1866885 | Mycolicibacterium                                |
| 0.01 | 1   | 1 S   | 2487344 | Mycolicibacterium nivoides                       |
| 0.01 | 1   | 1 S   | 1794    | Mycolicibacterium gadium                         |
| 0.03 | 3   | 3 G   | 1763    | Mycobacterium                                    |
| 0.02 | 2   | 0 G   | 670516  | Mycobacteroides                                  |
| 0.02 | 2   | 2 S   | 1774    | Mycobacteroides chelonae                         |
| 0.05 | 5   | 0 F   | 2805586 | Lawsonellaceae                                   |
| 0.05 | 5   | 0 G   | 1847725 | Lawsonella                                       |
| 0.05 | 5   | 5 S   | 1528099 | Lawsonella clevelandensis                        |
| 0.04 | 4   | 0 F   | 85025   | Nocardiaceae                                     |
| 0.04 | 4   | 4 G   | 1827    | Rhodococcus                                      |
| 0.02 | 2   | 0 F   | 85029   | Dietziaceae                                      |
| 0.02 | 2   | 0 G   | 37914   | Dietzia                                          |
| 0.02 | 2   | 0 G1  | 2617939 | unclassified Dietzia                             |
| 0.02 | 2   | 2 S   | 712270  | Dietzia sp. oral taxon 368                       |
| 0.17 | 16  | 0 O   | 85011   | Streptomycetales                                 |
| 0.17 | 16  | 0 F   | 2062    | Streptomycetaceae                                |
| 0.17 | 16  | 8 G   | 1883    | Streptomyces                                     |
| 0.02 | 2   | 0 G1  | 2593676 | unclassified Streptomyces                        |
| 0.01 | 1   | 1 S   | 2695266 | Streptomyces sp. HM190                           |
| 0.01 | 1   | 1 S   | 646637  | Streptomyces sp. M2                              |
| 0.02 | 2   | 2 S   | 1169025 | Streptomyces pratensis                           |
| 0.02 | 2   | 2 S   | 1927    | Streptomyces rimosus                             |
| 0.01 | 1   | 1 S   | 68270   | Streptomyces spectabilis                         |

|      |     |      |         |                                            |
|------|-----|------|---------|--------------------------------------------|
| 0.01 | 1   | 0 S  | 1912    | Streptomyces hygroscopicus                 |
| 0.01 | 1   | 1 S1 | 264445  | Streptomyces hygroscopicus subsp. limoneus |
| 0.13 | 12  | 0 O  | 85008   | Micromonosporales                          |
| 0.13 | 12  | 6 F  | 28056   | Micromonosporaceae                         |
| 0.06 | 6   | 0 G  | 1873    | Micromonospora                             |
| 0.04 | 4   | 0 G1 | 2617518 | unclassified Micromonospora                |
| 0.04 | 4   | 4 S  | 2583243 | Micromonospora sp. HM134                   |
| 0.02 | 2   | 2 S  | 261654  | Micromonospora auratinigra                 |
| 0.11 | 10  | 0 O  | 85010   | Pseudonocardiales                          |
| 0.11 | 10  | 0 F  | 2070    | Pseudonocardiaceae                         |
| 0.06 | 6   | 0 G  | 1813    | Amycolatopsis                              |
| 0.06 | 6   | 6 S  | 31958   | Amycolatopsis orientalis                   |
| 0.04 | 4   | 0 G  | 1847    | Pseudonocardia                             |
| 0.04 | 4   | 3 G1 | 2619320 | unclassified Pseudonocardia                |
| 0.01 | 1   | 1 S  | 2761535 | Pseudonocardia sp. CGMCC 4.1532            |
| 0.02 | 2   | 0 O  | 2037    | Actinomycetales                            |
| 0.02 | 2   | 0 F  | 2049    | Actinomycetaceae                           |
| 0.02 | 2   | 0 G  | 1654    | Actinomyces                                |
| 0.02 | 2   | 2 S  | 675090  | Actinomyces weissii                        |
| 0.02 | 2   | 0 O  | 85004   | Bifidobacteriales                          |
| 0.02 | 2   | 0 F  | 31953   | Bifidobacteriaceae                         |
| 0.02 | 2   | 0 G  | 1678    | Bifidobacterium                            |
| 0.01 | 1   | 1 S  | 1680    | Bifidobacterium adolescentis               |
| 0.01 | 1   | 1 S  | 28025   | Bifidobacterium animalis                   |
| 0.02 | 2   | 0 O  | 85013   | Frankiales                                 |
| 0.02 | 2   | 0 F  | 74712   | Frankiaceae                                |
| 0.02 | 2   | 0 G  | 1854    | Frankia                                    |
| 0.02 | 2   | 0 G1 | 2632575 | unclassified Frankia                       |
| 0.02 | 2   | 2 S  | 710111  | Frankia sp. QA3                            |
| 0.02 | 2   | 0 O  | 1217098 | Jiangellales                               |
| 0.02 | 2   | 0 F  | 1217100 | Jiangellaceae                              |
| 0.02 | 2   | 0 G  | 281472  | Jiangella                                  |
| 0.02 | 2   | 0 G1 | 2624397 | unclassified Jiangella                     |
| 0.02 | 2   | 2 S  | 1798224 | Jiangella sp. DSM 45060                    |
| 0.01 | 1   | 0 O  | 85014   | Glycomycetales                             |
| 0.01 | 1   | 0 F  | 85034   | Glycomycetaceae                            |
| 0.01 | 1   | 0 G  | 283810  | Stackebrandtia                             |
| 0.01 | 1   | 0 S  | 283811  | Stackebrandtia nassauensis                 |
| 0.01 | 1   | 1 S1 | 446470  | Stackebrandtia nassauensis DSM 44728       |
| 0.12 | 11  | 0 C  | 84995   | Rubrobacteria                              |
| 0.12 | 11  | 0 O  | 84996   | Rubrobacteriales                           |
| 0.11 | 10  | 0 F  | 84997   | Rubrobacteraceae                           |
| 0.11 | 10  | 0 G  | 42255   | Rubrobacter                                |
| 0.11 | 10  | 0 G1 | 2637691 | unclassified Rubrobacter                   |
| 0.11 | 10  | 10 S | 2653851 | Rubrobacter sp. SC5IO 52909                |
| 0.01 | 1   | 0 F  | 2600303 | Baekduiaceae                               |
| 0.01 | 1   | 0 G  | 2600304 | Baekduia                                   |
| 0.01 | 1   | 1 S  | 496014  | Baekduia soli                              |
| 1.85 | 172 | 3 P  | 1239    | Firmicutes                                 |
| 0.79 | 73  | 2 C  | 91061   | Bacilli                                    |
| 0.53 | 49  | 0 O  | 1385    | Bacillales                                 |
| 0.53 | 49  | 0 F  | 90964   | Staphylococcaceae                          |
| 0.53 | 49  | 8 G  | 1279    | Staphylococcus                             |
| 0.25 | 23  | 23 S | 1282    | Staphylococcus epidermidis                 |
| 0.14 | 13  | 13 S | 29388   | Staphylococcus capitis                     |
| 0.05 | 5   | 5 S  | 1292    | Staphylococcus warneri                     |
| 0.24 | 22  | 3 O  | 186826  | Lactobacillales                            |
| 0.11 | 10  | 0 F  | 1300    | Streptococcaceae                           |
| 0.11 | 10  | 3 G  | 1301    | Streptococcus                              |
| 0.02 | 2   | 2 S  | 28037   | Streptococcus mitis                        |
| 0.02 | 2   | 2 S  | 1308    | Streptococcus thermophilus                 |
| 0.02 | 2   | 2 S  | 1304    | Streptococcus salivarius                   |
| 0.01 | 1   | 1 S  | 1305    | Streptococcus sanguinis                    |
| 0.1  | 9   | 0 F  | 33958   | Lactobacillaceae                           |
| 0.08 | 7   | 0 G  | 1578    | Lactobacillus                              |
| 0.08 | 7   | 0 S  | 1584    | Lactobacillus delbrueckii                  |
| 0.08 | 7   | 7 S1 | 29397   | Lactobacillus delbrueckii subsp. lactis    |
| 0.01 | 1   | 0 G  | 2767842 | Lactiplantibacillus                        |
| 0.01 | 1   | 1 S  | 1590    | Lactiplantibacillus plantarum              |
| 0.01 | 1   | 0 G  | 2767885 | Latilactobacillus                          |
| 0.01 | 1   | 1 S  | 1599    | Latilactobacillus sakei                    |
| 0.72 | 67  | 0 C  | 186801  | Clostridia                                 |
| 0.72 | 67  | 3 O  | 186802  | Eubacteriales                              |
| 0.37 | 34  | 2 F  | 186803  | Lachnospiraceae                            |
| 0.18 | 17  | 1 G  | 841     | Roseburia                                  |
| 0.15 | 14  | 7 S  | 166486  | Roseburia intestinalis                     |
| 0.03 | 3   | 3 S1 | 536231  | Roseburia intestinalis L1-82               |
| 0.03 | 3   | 3 S1 | 657315  | Roseburia intestinalis M50/1               |
| 0.01 | 1   | 1 S1 | 718255  | Roseburia intestinalis XB6B4               |
| 0.02 | 2   | 2 S  | 301301  | Roseburia hominis                          |
| 0.04 | 4   | 0 G  | 28050   | Lachnospira                                |
| 0.04 | 4   | 0 S  | 39485   | Lachnospira eligens                        |
| 0.04 | 4   | 4 S1 | 515620  | [Eubacterium] eligens ATCC 27750           |
| 0.03 | 3   | 0 G  | 572511  | Blautia                                    |
| 0.02 | 2   | 0 G1 | 2648079 | unclassified Blautia                       |
| 0.02 | 2   | 2 S  | 2479767 | Blautia sp. SC05B48                        |
| 0.01 | 1   | 0 S  | 40520   | Blautia obeum                              |
| 0.01 | 1   | 1 S1 | 657314  | Blautia obeum A2-162                       |
| 0.02 | 2   | 0 G  | 2569097 | Anaerobutyricum                            |
| 0.02 | 2   | 2 S  | 39488   | Anaerobutyricum hallii                     |
| 0.02 | 2   | 1 G  | 2719313 | Enterocloster                              |
| 0.01 | 1   | 1 S  | 1531    | Enterocloster clostridioformis             |
| 0.01 | 1   | 0 G  | 33042   | Coprococcus                                |
| 0.01 | 1   | 1 S  | 410072  | Coprococcus comes                          |
| 0.01 | 1   | 1 G  | 1506553 | Lachnoclostridium                          |
| 0.01 | 1   | 0 G  | 2316020 | Mediterraneibacter                         |
| 0.01 | 1   | 0 S  | 33039   | [Ruminococcus] torques                     |
| 0.01 | 1   | 1 S1 | 657313  | [Ruminococcus] torques L2-14               |
| 0.01 | 1   | 0 G  | 2719231 | Lacrimispora                               |
| 0.01 | 1   | 1 S  | 84030   | Lacrimispora saccharolytica                |
| 0.25 | 23  | 0 F  | 216572  | Oscillospiraceae                           |
| 0.18 | 17  | 0 G  | 216851  | Faecalibacterium                           |
| 0.18 | 17  | 11 S | 853     | Faecalibacterium prausnitzii               |
| 0.04 | 4   | 4 S1 | 718252  | Faecalibacterium prausnitzii L2-6          |

|      |     |       |         |                                     |
|------|-----|-------|---------|-------------------------------------|
| 0.02 | 2   | 2 S1  | 657322  | Faecalibacterium prausnitzii SL3/3  |
| 0.02 | 2   | 0 G   | 1263    | Ruminococcus                        |
| 0.02 | 2   | 2 S   | 1160721 | Ruminococcus bicirculans            |
| 0.02 | 2   | 0 G   | 459786  | Oscillibacter                       |
| 0.02 | 2   | 0 G1  | 2629304 | unclassified Oscillibacter          |
| 0.01 | 1   | 1 S   | 2109687 | Oscillibacter sp. PE192             |
| 0.01 | 1   | 1 S   | 2763056 | Oscillibacter sp. NSJ-62            |
| 0.01 | 1   | 0 G   | 1905344 | Ruthenibacterium                    |
| 0.01 | 1   | 1 S   | 1550024 | Ruthenibacterium lactatiformans     |
| 0.01 | 1   | 0 G   | 2591381 | Dysosmobacter                       |
| 0.01 | 1   | 1 S   | 2093857 | Dysosmobacter welbionis             |
| 0.03 | 3   | 0 F   | 186804  | Peptostreptococcaceae               |
| 0.02 | 2   | 0 G   | 1870884 | Clostridioides                      |
| 0.02 | 2   | 2 S   | 1496    | Clostridioides difficile            |
| 0.01 | 1   | 1 G   | 1501226 | Romboutsia                          |
| 0.02 | 2   | 0 O1  | 538999  | Eubacteriales incertae sedis        |
| 0.01 | 1   | 0 G   | 1392389 | Intestinimonas                      |
| 0.01 | 1   | 1 S   | 1297617 | Intestinimonas butyriciproducens    |
| 0.01 | 1   | 0 G   | 2039302 | Monoglobus                          |
| 0.01 | 1   | 1 S   | 1981510 | Monoglobus pectinilyticus           |
| 0.01 | 1   | 0 F   | 31979   | Clostridiaceae                      |
| 0.01 | 1   | 0 G   | 1485    | Clostridium                         |
| 0.01 | 1   | 1 S   | 1561    | Clostridium baratii                 |
| 0.01 | 1   | 0 F   | 186806  | Eubacteriaceae                      |
| 0.01 | 1   | 0 G   | 33951   | Acetobacterium                      |
| 0.01 | 1   | 0 S   | 33952   | Acetobacterium woodii               |
| 0.01 | 1   | 1 S1  | 931626  | Acetobacterium woodii DSM 1030      |
| 0.16 | 15  | 0 C   | 909932  | Negativicutes                       |
| 0.13 | 12  | 0 O   | 1843489 | Veillonellales                      |
| 0.13 | 12  | 0 F   | 31977   | Veillonellaceae                     |
| 0.13 | 12  | 0 G   | 29465   | Veillonella                         |
| 0.13 | 12  | 7 S   | 29466   | Veillonella parvula                 |
| 0.05 | 5   | 5 S1  | 1316254 | Veillonella parvula HSIVP1          |
| 0.03 | 3   | 0 O   | 1843488 | Acidaminococcales                   |
| 0.03 | 3   | 0 F   | 909930  | Acidaminococcaceae                  |
| 0.03 | 3   | 0 G   | 33024   | Phascolarctobacterium               |
| 0.03 | 3   | 3 S   | 33025   | Phascolarctobacterium faecium       |
| 0.15 | 14  | 0 C   | 526524  | Erysipelotrichia                    |
| 0.15 | 14  | 0 O   | 526525  | Erysipelotrichales                  |
| 0.15 | 14  | 0 F   | 2810281 | Turicibacteraceae                   |
| 0.15 | 14  | 0 G   | 191303  | Turicibacter                        |
| 0.13 | 12  | 12 S  | 154288  | Turicibacter sanguinis              |
| 0.02 | 2   | 0 G1  | 2638206 | unclassified Turicibacter           |
| 0.02 | 2   | 2 S   | 1712675 | Turicibacter sp. H121               |
| 0.2  | 19  | 0 D2  | 1798711 | Cyanobacteria/Melainabacteria group |
| 0.2  | 19  | 0 P   | 1117    | Cyanobacteria                       |
| 0.12 | 11  | 1 O   | 1161    | Nostocales                          |
| 0.05 | 5   | 0 F   | 1162    | Nostocaceae                         |
| 0.05 | 5   | 5 G   | 1177    | Nostoc                              |
| 0.05 | 5   | 0 F   | 1182    | Scytonemataceae                     |
| 0.05 | 5   | 0 G   | 1203    | Scytonema                           |
| 0.05 | 5   | 0 G1  | 2618749 | unclassified Scytonema              |
| 0.05 | 5   | 5 S   | 1137095 | Scytonema sp. HK-05                 |
| 0.08 | 7   | 0 O   | 52604   | Pleurocapsales                      |
| 0.08 | 7   | 0 F   | 1890500 | Hyellaceae                          |
| 0.08 | 7   | 0 G   | 44474   | Pleurocapsa                         |
| 0.08 | 7   | 0 S   | 54308   | Pleurocapsa minor                   |
| 0.08 | 7   | 7 S1  | 118163  | Pleurocapsa sp. PCC 7327            |
| 0.01 | 1   | 0 O   | 1890424 | Synechococcales                     |
| 0.01 | 1   | 0 F   | 1890438 | Leptolyngbyaceae                    |
| 0.01 | 1   | 0 G   | 47251   | Leptolyngbya                        |
| 0.01 | 1   | 0 G1  | 2650499 | unclassified Leptolyngbya           |
| 0.01 | 1   | 1 S   | 1752064 | Leptolyngbya sp. NIES-3755          |
| 1.79 | 166 | 0 D   | 2759    | Eukaryota                           |
| 1.2  | 112 | 0 D1  | 33154   | Opisthokonta                        |
| 1.09 | 101 | 0 K   | 4751    | Fungi                               |
| 1.09 | 101 | 0 K1  | 451864  | Dikarya                             |
| 1.09 | 101 | 0 P   | 5204    | Basidiomycota                       |
| 1.09 | 101 | 0 P1  | 452284  | Ustilaginomycotina                  |
| 1.09 | 101 | 0 C   | 1538075 | Malasseziomycetes                   |
| 1.09 | 101 | 0 O   | 162474  | Malasseziales                       |
| 1.09 | 101 | 0 F   | 742845  | Malasseziaceae                      |
| 1.09 | 101 | 0 G   | 55193   | Malassezia                          |
| 1.09 | 101 | 101 S | 76775   | Malassezia restricta                |
| 0.12 | 11  | 0 K   | 33208   | Metazoa                             |
| 0.12 | 11  | 0 K1  | 6072    | Eumetazoa                           |
| 0.12 | 11  | 0 K2  | 33213   | Bilateria                           |
| 0.12 | 11  | 0 K3  | 33511   | Deuterostomia                       |
| 0.12 | 11  | 0 P   | 7711    | Chordata                            |
| 0.12 | 11  | 0 P1  | 89593   | Craniata                            |
| 0.12 | 11  | 0 P2  | 7742    | Vertebrata                          |
| 0.12 | 11  | 0 P3  | 7776    | Gnathostomata                       |
| 0.12 | 11  | 0 P4  | 117570  | Teleostomi                          |
| 0.12 | 11  | 0 P5  | 117571  | Euteleostomi                        |
| 0.12 | 11  | 0 P6  | 8287    | Sarcopterygii                       |
| 0.12 | 11  | 0 C   | 1338369 | Dipnotetrapodomorpha                |
| 0.12 | 11  | 0 C1  | 32523   | Tetrapoda                           |
| 0.12 | 11  | 0 C2  | 32524   | Amniota                             |
| 0.12 | 11  | 0 C   | 40674   | Mammalia                            |
| 0.12 | 11  | 0 C1  | 32525   | Theria                              |
| 0.12 | 11  | 0 C2  | 9347    | Eutheria                            |
| 0.12 | 11  | 0 C3  | 1437010 | Boreoeutheria                       |
| 0.12 | 11  | 0 C4  | 314146  | Euarchontoglires                    |
| 0.12 | 11  | 0 O   | 9443    | Primates                            |
| 0.12 | 11  | 0 O1  | 376913  | Haplorrhini                         |
| 0.12 | 11  | 0 O2  | 314293  | Simiiformes                         |
| 0.12 | 11  | 0 O3  | 9526    | Catarrhini                          |
| 0.12 | 11  | 0 O4  | 314295  | Hominoidea                          |
| 0.12 | 11  | 0 F   | 9604    | Hominidae                           |
| 0.12 | 11  | 0 F1  | 207598  | Homininae                           |
| 0.12 | 11  | 0 G   | 9605    | Homo                                |
| 0.12 | 11  | 11 S  | 9606    | Homo sapiens                        |
| 0.58 | 54  | 0 K   | 33090   | Viridiplantae                       |
| 0.58 | 54  | 0 P   | 35493   | Streptophyta                        |



|      |    |       |         |                                   |
|------|----|-------|---------|-----------------------------------|
| 0.58 | 54 | 0 P1  | 131221  | Streptophytina                    |
| 0.58 | 54 | 0 P2  | 3193    | Embryophyta                       |
| 0.58 | 54 | 0 P3  | 58023   | Tracheophyta                      |
| 0.58 | 54 | 0 P4  | 78536   | Euphyllophyta                     |
| 0.58 | 54 | 0 P5  | 58024   | Spermatophyta                     |
| 0.58 | 54 | 0 C   | 3398    | Magnoliopsida                     |
| 0.58 | 54 | 0 C1  | 1437183 | Mesangiospermae                   |
| 0.42 | 39 | 0 C2  | 4447    | Liliopsida                        |
| 0.42 | 39 | 0 C3  | 1437197 | Petrosaviidae                     |
| 0.42 | 39 | 0 C4  | 4734    | commelinids                       |
| 0.42 | 39 | 0 O   | 38820   | Poales                            |
| 0.42 | 39 | 0 F   | 4479    | Poaceae                           |
| 0.42 | 39 | 0 F1  | 359160  | BOP clade                         |
| 0.42 | 39 | 0 F2  | 147368  | Pooideae                          |
| 0.42 | 39 | 0 F3  | 1648038 | Triticoideae                      |
| 0.42 | 39 | 0 F4  | 147389  | Triticeae                         |
| 0.42 | 39 | 12 F5 | 1648030 | Triticinae                        |
| 0.29 | 27 | 0 G   | 4564    | Triticum                          |
| 0.29 | 27 | 27 S  | 85692   | Triticum dicoccoides              |
| 0.16 | 15 | 0 C2  | 71240   | eudicotyledons                    |
| 0.16 | 15 | 0 C3  | 91827   | Gunneridae                        |
| 0.16 | 15 | 0 C4  | 1437201 | Pentapetalae                      |
| 0.15 | 14 | 0 C5  | 71275   | rosids                            |
| 0.14 | 13 | 1 C6  | 91836   | malvids                           |
| 0.13 | 12 | 0 O   | 41937   | Sapindales                        |
| 0.13 | 12 | 0 F   | 23513   | Rutaceae                          |
| 0.13 | 12 | 0 F1  | 1728959 | Aurantioidae                      |
| 0.13 | 12 | 0 G   | 2706    | Citrus                            |
| 0.13 | 12 | 12 S  | 2711    | Citrus sinensis                   |
| 0.01 | 1  | 0 C6  | 91835   | fabids                            |
| 0.01 | 1  | 0 O   | 72025   | Fabales                           |
| 0.01 | 1  | 0 F   | 3803    | Fabaceae                          |
| 0.01 | 1  | 0 F1  | 3814    | Papilionoideae                    |
| 0.01 | 1  | 0 F2  | 2231393 | 50 kb inversion clade             |
| 0.01 | 1  | 0 F3  | 2231387 | dalbergioids sensu lato           |
| 0.01 | 1  | 0 F4  | 163725  | Dalbergieae                       |
| 0.01 | 1  | 0 F5  | 2231390 | Pterocarpus clade                 |
| 0.01 | 1  | 1 G   | 3817    | Arachis                           |
| 0.01 | 1  | 0 C5  | 71274   | asterids                          |
| 0.01 | 1  | 0 C6  | 91882   | campanulids                       |
| 0.01 | 1  | 0 O   | 4209    | Asterales                         |
| 0.01 | 1  | 0 F   | 4210    | Asteraceae                        |
| 0.01 | 1  | 0 F1  | 102804  | Asteroideae                       |
| 0.01 | 1  | 0 F2  | 911341  | Heliantheae alliance              |
| 0.01 | 1  | 0 F3  | 102814  | Heliantheae                       |
| 0.01 | 1  | 0 G   | 4231    | Helianthus                        |
| 0.01 | 1  | 1 S   | 4232    | Helianthus annuus                 |
| 0.01 | 1  | 0 D   | 10239   | Viruses                           |
| 0.01 | 1  | 0 D1  | 2731341 | Duplodnaviria                     |
| 0.01 | 1  | 0 D2  | 2731360 | Heunggongvirae                    |
| 0.01 | 1  | 0 P   | 2731618 | Uroviricota                       |
| 0.01 | 1  | 0 C   | 2731619 | Caudoviricetes                    |
| 0.01 | 1  | 0 O   | 28883   | Caudovirales                      |
| 0.01 | 1  | 0 F   | 10699   | Siphoviridae                      |
| 0.01 | 1  | 0 G   | 1982251 | Pahexavirus                       |
| 0.01 | 1  | 0 S   | 1982277 | Propionibacterium virus PHL060L00 |
| 0.01 | 1  | 1 S1  | 1235647 | Propionibacterium phage PHL060L00 |

Table S5-4. NC3\_taxa

|       |       |         |         |                                       |
|-------|-------|---------|---------|---------------------------------------|
| 16.8  | 9381  | 9381 U  | 0       | unclassified                          |
| 83.2  | 46451 | 0 R     | 1       | root                                  |
| 82.04 | 45804 | 13 R1   | 131567  | cellular organisms                    |
| 75.39 | 42092 | 273 D   | 2       | Bacteria                              |
| 71.67 | 40013 | 830 P   | 1224    | Proteobacteria                        |
| 68.6  | 38302 | 8 C     | 28216   | Betaproteobacteria                    |
| 68.58 | 38290 | 1000 O  | 80840   | Burkholderiales                       |
| 66.65 | 37212 | 927 F   | 80864   | Comamonadaceae                        |
| 64.2  | 35844 | 23321 G | 80865   | Delftia                               |
| 19.75 | 11025 | 11025 S | 558537  | Delftia lacustris                     |
| 1.33  | 742   | 742 S   | 80866   | Delftia acidovorans                   |
| 1.01  | 564   | 564 S   | 180282  | Delftia tsuruhatensis                 |
| 0.34  | 192   | 25 G1   | 2613839 | unclassified Delftia                  |
| 0.22  | 123   | 123 S   | 742013  | Delftia sp. Cs1-4                     |
| 0.08  | 44    | 44 S    | 1920191 | Delftia sp. HK171                     |
| 0.28  | 154   | 24 G    | 12916   | Acidovorax                            |
| 0.22  | 122   | 5 G1    | 2684926 | unclassified Acidovorax               |
| 0.18  | 102   | 102 S   | 358220  | Acidovorax sp. KKS102                 |
| 0.02  | 9     | 9 S     | 232721  | Acidovorax sp. JS42                   |
| 0.01  | 5     | 5 S     | 2518343 | Acidovorax sp. JMULE5                 |
| 0     | 1     | 1 S     | 1842533 | Acidovorax sp. RAC01                  |
| 0.01  | 8     | 8 S     | 553814  | Acidovorax carolinensis               |
| 0.22  | 125   | 0 G     | 201096  | Alicyclophilus                        |
| 0.22  | 125   | 1 S     | 179636  | Alicyclophilus denitrificans          |
| 0.22  | 124   | 124 S1  | 596154  | Alicyclophilus denitrificans K601     |
| 0.09  | 48    | 2 G     | 34072   | Variovorax                            |
| 0.08  | 46    | 1 G1    | 663243  | unclassified Variovorax               |
| 0.05  | 27    | 27 S    | 1034889 | Variovorax sp. HW608                  |
| 0.02  | 10    | 10 S    | 662548  | Variovorax sp. RA8                    |
| 0.01  | 8     | 8 S     | 207745  | Variovorax sp. WDL1                   |
| 0.09  | 48    | 0 G     | 238749  | Diaphorobacter                        |
| 0.09  | 48    | 0 G1    | 2649760 | unclassified Diaphorobacter           |
| 0.06  | 34    | 34 S    | 2714924 | Diaphorobacter sp. HDW4A              |
| 0.03  | 14    | 14 S    | 2792224 | Diaphorobacter sp. JS3051             |
| 0.08  | 45    | 0 G     | 283     | Comamonas                             |
| 0.05  | 26    | 26 S    | 160825  | Comamonas koreensis                   |
| 0.01  | 6     | 0 S     | 285     | Comamonas testosteroni                |
| 0.01  | 6     | 6 S1    | 1392005 | Comamonas testosteroni TK102          |
| 0.01  | 4     | 4 S     | 225992  | Comamonas kerstersii                  |
| 0.01  | 4     | 0 G1    | 2638500 | unclassified Comamonas                |
| 0.01  | 4     | 4 S     | 1232667 | Comamonas sp. 7D-2                    |
| 0.01  | 3     | 3 S     | 1082851 | Comamonas serinivorans                |
| 0     | 1     | 1 S     | 225991  | Comamonas aquatica                    |
| 0     | 1     | 1 S     | 363952  | Comamonas thiooxydans                 |
| 0.02  | 12    | 0 G     | 47420   | Hydrogenophaga                        |
| 0.02  | 12    | 0 G1    | 2610897 | unclassified Hydrogenophaga           |
| 0.02  | 12    | 12 S    | 795665  | Hydrogenophaga sp. PBC                |
| 0     | 2     | 0 G     | 28065   | Rhodoferrax                           |
| 0     | 1     | 0 S     | 192843  | Rhodoferrax ferrireducens             |
| 0     | 1     | 1 S1    | 338969  | Rhodoferrax ferrireducens T118        |
| 0     | 1     | 0 G1    | 2627954 | unclassified Rhodoferrax              |
| 0     | 1     | 1 S     | 2741720 | Rhodoferrax sp. BAB1                  |
| 0     | 2     | 0 G     | 52972   | Polaromonas                           |
| 0     | 2     | 2 G1    | 2638319 | unclassified Polaromonas              |
| 0     | 2     | 0 G     | 215579  | Schlegelella                          |
| 0     | 2     | 2 S     | 215580  | Schlegelella thermodepolymerans       |
| 0     | 2     | 0 G     | 1649468 | Melaminivora                          |
| 0     | 2     | 0 G1    | 2641902 | unclassified Melaminivora             |
| 0     | 2     | 2 S     | 2109913 | Melaminivora sp. SC2-9                |
| 0     | 1     | 0 G     | 2678886 | Pulveribacter                         |
| 0     | 1     | 1 S     | 2116657 | Pulveribacter suum                    |
| 0.09  | 50    | 0 F     | 119060  | Burkholderiaceae                      |
| 0.06  | 31    | 0 G     | 106589  | Cupriavidus                           |
| 0.03  | 17    | 17 S    | 119219  | Cupriavidus metallidurans             |
| 0.02  | 13    | 13 S    | 1796606 | Cupriavidus nantongensis              |
| 0     | 1     | 1 S     | 68895   | Cupriavidus basilensis                |
| 0.02  | 12    | 0 G     | 48736   | Ralstonia                             |
| 0.02  | 11    | 11 S    | 305     | Ralstonia solanacearum                |
| 0     | 1     | 0 S     | 329     | Ralstonia pickettii                   |
| 0     | 1     | 1 S1    | 428406  | Ralstonia pickettii 12D               |
| 0.01  | 5     | 0 G     | 32008   | Burkholderia                          |
| 0.01  | 5     | 5 G1    | 87882   | Burkholderia cepacia complex          |
| 0     | 2     | 0 G     | 93217   | Pandoraea                             |
| 0     | 1     | 1 S     | 93220   | Pandoraea pnomenusa                   |
| 0     | 1     | 1 S     | 573737  | Pandoraea oxalativorans               |
| 0.02  | 13    | 0 F     | 75682   | Oxalobacteraceae                      |
| 0.02  | 12    | 0 G     | 75654   | Duganella                             |
| 0.02  | 12    | 0 G1    | 2636909 | unclassified Duganella                |
| 0.02  | 12    | 12 S    | 2728020 | Duganella sp. GN2-R2                  |
| 0     | 1     | 0 G     | 1344552 | Noviherbaspirillum                    |
| 0     | 1     | 0 G1    | 2617509 | unclassified Noviherbaspirillum       |
| 0     | 1     | 1 S     | 2601898 | Noviherbaspirillum sp. UKPF54         |
| 0.02  | 9     | 0 F     | 506     | Alcaligenaceae                        |
| 0.01  | 5     | 0 G     | 517     | Bordetella                            |
| 0.01  | 5     | 5 S     | 94624   | Bordetella petrii                     |
| 0     | 2     | 1 G     | 222     | Achromobacter                         |
| 0     | 1     | 1 S     | 85698   | Achromobacter xylosoxidans            |
| 0     | 2     | 0 G     | 507     | Alcaligenes                           |
| 0     | 2     | 2 S     | 511     | Alcaligenes faecalis                  |
| 0.01  | 4     | 0 O1    | 224471  | Burkholderiales genera incertae sedis |
| 0.01  | 4     | 0 G     | 88      | Leptothrix                            |
| 0.01  | 4     | 0 S     | 34029   | Leptothrix cholodnii                  |
| 0.01  | 4     | 4 S1    | 395495  | Leptothrix cholodnii SP-6             |
| 0     | 2     | 0 F     | 995019  | Sutterellaceae                        |
| 0     | 2     | 0 G     | 40544   | Sutterella                            |
| 0     | 2     | 2 S     | 40545   | Sutterella wadsworthensis             |
| 0     | 2     | 0 O     | 32003   | Nitrosomonadales                      |
| 0     | 2     | 0 F     | 2008793 | Sterolibacteriaceae                   |
| 0     | 2     | 0 G     | 311181  | Denitratisoma                         |
| 0     | 2     | 2 S     | 311182  | Denitratisoma oestradiolicum          |
| 0     | 2     | 0 O     | 206389  | Rhodocyclales                         |
| 0     | 2     | 0 F     | 2008794 | Zoogloeaceae                          |
| 0     | 2     | 0 G     | 12960   | Azoarcus                              |

|      |     |       |         |                                                    |
|------|-----|-------|---------|----------------------------------------------------|
| 0    | 2   | 2 G1  | 2629479 | unclassified Azoarcus                              |
| 1.39 | 775 | 16 C  | 1236    | Gamma proteobacteria                               |
| 0.81 | 453 | 0 O   | 135614  | Xanthomonadales                                    |
| 0.81 | 453 | 0 F   | 32033   | Xanthomonadaceae                                   |
| 0.8  | 449 | 71 G  | 40323   | Stenotrophomonas                                   |
| 0.68 | 377 | 0 G1  | 995085  | Stenotrophomonas maltophilia group                 |
| 0.68 | 377 | 374 S | 40324   | Stenotrophomonas maltophilia                       |
| 0    | 2   | 2 S1  | 868597  | Stenotrophomonas maltophilia JV3                   |
| 0    | 1   | 1 S1  | 391008  | Stenotrophomonas maltophilia R551-3                |
| 0    | 1   | 0 G1  | 196198  | unclassified Stenotrophomonas                      |
| 0    | 1   | 1 S   | 2282124 | Stenotrophomonas sp. ASS1                          |
| 0.01 | 4   | 0 G   | 338     | Xanthomonas                                        |
| 0.01 | 3   | 3 S   | 339     | Xanthomonas campestris                             |
| 0    | 1   | 0 G1  | 643453  | Xanthomonas citri group                            |
| 0    | 1   | 0 S   | 346     | Xanthomonas citri                                  |
| 0    | 1   | 1 S1  | 473421  | Xanthomonas citri pv. glycines                     |
| 0.53 | 297 | 0 O   | 72274   | Pseudomonadales                                    |
| 0.52 | 290 | 0 F   | 135621  | Pseudomonadaceae                                   |
| 0.52 | 290 | 2 G   | 286     | Pseudomonas                                        |
| 0.51 | 284 | 0 G1  | 136841  | Pseudomonas aeruginosa group                       |
| 0.51 | 283 | 283 S | 287     | Pseudomonas aeruginosa                             |
| 0    | 1   | 0 G2  | 1232139 | Pseudomonas oleovorans/pseudoalcaligenes group     |
| 0    | 1   | 1 S   | 301     | Pseudomonas oleovorans                             |
| 0    | 2   | 0 G1  | 136842  | Pseudomonas chlororaphis group                     |
| 0    | 2   | 2 S   | 587753  | Pseudomonas chlororaphis                           |
| 0    | 1   | 0 G1  | 136849  | Pseudomonas syringae group                         |
| 0    | 1   | 1 G2  | 251698  | Pseudomonas syringae group genomsp. 2              |
| 0    | 1   | 0 G1  | 136846  | Pseudomonas stutzeri group                         |
| 0    | 1   | 0 G2  | 578833  | Pseudomonas stutzeri subgroup                      |
| 0    | 1   | 1 S   | 316     | Pseudomonas stutzeri                               |
| 0.01 | 7   | 0 F   | 468     | Moraxellaceae                                      |
| 0.01 | 7   | 0 G   | 469     | Acinetobacter                                      |
| 0.01 | 7   | 7 S   | 40214   | Acinetobacter johnsonii                            |
| 0.01 | 5   | 0 O   | 91347   | Enterobacterales                                   |
| 0.01 | 5   | 2 F   | 543     | Enterobacteriaceae                                 |
| 0    | 1   | 0 G   | 547     | Enterobacter                                       |
| 0    | 1   | 0 G1  | 354276  | Enterobacter cloacae complex                       |
| 0    | 1   | 1 S   | 208224  | Enterobacter kobei                                 |
| 0    | 1   | 0 G   | 561     | Escherichia                                        |
| 0    | 1   | 1 S   | 562     | Escherichia coli                                   |
| 0    | 1   | 1 G   | 570     | Klebsiella                                         |
| 0.01 | 4   | 0 O   | 135625  | Pasteurellales                                     |
| 0.01 | 4   | 0 F   | 712     | Pasteurellaceae                                    |
| 0.01 | 4   | 0 G   | 2094023 | Glaesserella                                       |
| 0.01 | 4   | 4 S   | 738     | Glaesserella parasuis                              |
| 0.15 | 85  | 0 C   | 28211   | Alphaproteobacteria                                |
| 0.13 | 70  | 0 O   | 356     | Hyphomicrobiales                                   |
| 0.09 | 53  | 0 F   | 69277   | Phyllobacteriaceae                                 |
| 0.08 | 46  | 0 G   | 31988   | Aminobacter                                        |
| 0.08 | 46  | 0 G1  | 2644704 | unclassified Aminobacter                           |
| 0.08 | 46  | 46 S  | 2774562 | Aminobacter sp. SR38                               |
| 0.01 | 7   | 0 G   | 28100   | Phyllobacterium                                    |
| 0.01 | 5   | 5 S   | 1867719 | Phyllobacterium zundukense                         |
| 0    | 2   | 0 G1  | 2638441 | unclassified Phyllobacterium                       |
| 0    | 2   | 2 S   | 2718938 | Phyllobacterium sp. 628                            |
| 0.02 | 11  | 0 F   | 82115   | Rhizobiaceae                                       |
| 0.02 | 11  | 0 F1  | 227290  | Rhizobium/Agrobacterium group                      |
| 0.01 | 7   | 0 G   | 1525371 | Neorhizobium                                       |
| 0.01 | 7   | 0 S   | 399     | Neorhizobium galegae                               |
| 0.01 | 7   | 0 S1  | 323655  | Neorhizobium galegae bv. orientalis                |
| 0.01 | 7   | 7 S2  | 1028800 | Neorhizobium galegae bv. orientalis str. HAMBI 540 |
| 0.01 | 4   | 0 G   | 357     | Agrobacterium                                      |
| 0    | 2   | 2 S   | 28099   | Agrobacterium rubi                                 |
| 0    | 2   | 0 G1  | 1183400 | Agrobacterium tumefaciens complex                  |
| 0    | 2   | 2 S   | 358     | Agrobacterium tumefaciens                          |
| 0.01 | 5   | 2 F   | 119045  | Methylobacteriaceae                                |
| 0    | 2   | 0 G   | 2282523 | Methylobacterium                                   |
| 0    | 1   | 0 S   | 408     | Methylobacterium extorquens                        |
| 0    | 1   | 1 S1  | 272630  | Methylobacterium extorquens AM1                    |
| 0    | 1   | 1 S   | 223967  | Methylobacterium populi                            |
| 0    | 1   | 1 G   | 407     | Methylobacterium                                   |
| 0    | 1   | 0 F   | 41294   | Bradyrhizobiaceae                                  |
| 0    | 1   | 0 G   | 374     | Bradyrhizobium                                     |
| 0    | 1   | 0 G1  | 2631580 | unclassified Bradyrhizobium                        |
| 0    | 1   | 1 S   | 2493093 | Bradyrhizobium sp. LCT2                            |
| 0.03 | 14  | 0 O   | 204457  | Sphingomonadales                                   |
| 0.03 | 14  | 0 F   | 41297   | Sphingomonadaceae                                  |
| 0.01 | 7   | 0 G   | 13687   | Sphingomonas                                       |
| 0.01 | 5   | 5 S   | 13689   | Sphingomonas paucimobilis                          |
| 0    | 2   | 0 G1  | 196159  | unclassified Sphingomonas                          |
| 0    | 1   | 1 S   | 2698679 | Sphingomonas sp. C33                               |
| 0    | 1   | 1 S   | 304378  | Sphingomonas sp. IC081                             |
| 0.01 | 4   | 3 G   | 165695  | Sphingobium                                        |
| 0    | 1   | 0 G1  | 2611147 | unclassified Sphingobium                           |
| 0    | 1   | 1 S   | 2082188 | Sphingobium sp. YG1                                |
| 0.01 | 3   | 2 G   | 165697  | Sphingopyxis                                       |
| 0    | 1   | 0 S   | 117207  | Sphingopyxis alaskensis                            |
| 0    | 1   | 1 S1  | 317655  | Sphingopyxis alaskensis RB2256                     |
| 0    | 1   | 0 O   | 204458  | Caulobacterales                                    |
| 0    | 1   | 0 F   | 76892   | Caulobacteraceae                                   |
| 0    | 1   | 1 G   | 41275   | Brevundimonas                                      |
| 0.04 | 21  | 0 P1  | 68525   | delta/epsilon subdivisions                         |
| 0.03 | 18  | 0 C   | 29547   | Epsilonproteobacteria                              |
| 0.03 | 18  | 0 O   | 213849  | Campylobacterales                                  |
| 0.03 | 18  | 0 F   | 72294   | Campylobacteraceae                                 |
| 0.03 | 18  | 7 G   | 194     | Campylobacter                                      |
| 0.02 | 11  | 11 S  | 195     | Campylobacter coli                                 |
| 0.01 | 3   | 0 C   | 28221   | Deltaproteobacteria                                |
| 0    | 2   | 0 O   | 69541   | Desulfuromonadales                                 |
| 0    | 2   | 0 F   | 2812024 | Syntrophotaleaceae                                 |
| 0    | 2   | 0 G   | 2812025 | Syntrophotalea                                     |
| 0    | 2   | 2 S   | 1842532 | Syntrophotalea acetylenivorans                     |
| 0    | 1   | 0 O   | 29      | Myxococcales                                       |
| 0    | 1   | 0 O1  | 80811   | Cystobacterineae                                   |

|      |      |        |         |                                       |
|------|------|--------|---------|---------------------------------------|
| 0    | 1    | 0 F    | 31      | Myxococcaceae                         |
| 0    | 1    | 0 G    | 83461   | Coralloccoccus                        |
| 0    | 1    | 1 S    | 184914  | Coralloccoccus coralloides            |
| 2.34 | 1304 | 0 D1   | 1783270 | FCB group                             |
| 2.34 | 1304 | 0 D2   | 68336   | Bacteroidetes/Chlorobi group          |
| 2.34 | 1304 | 3 P    | 976     | Bacteroidetes                         |
| 2.31 | 1288 | 0 C    | 200643  | Bacteroidia                           |
| 2.31 | 1288 | 318 O  | 171549  | Bacteroidales                         |
| 0.77 | 429  | 0 F    | 815     | Bacteroidaceae                        |
| 0.77 | 429  | 80 G   | 816     | Bacteroides                           |
| 0.19 | 107  | 107 S  | 820     | Bacteroides uniformis                 |
| 0.11 | 64   | 20 G1  | 2646097 | unclassified Bacteroides              |
| 0.04 | 24   | 24 S   | 2785531 | Bacteroides sp. HF-162                |
| 0.01 | 7    | 7 S    | 2528203 | Bacteroides sp. A1C1                  |
| 0.01 | 5    | 5 S    | 2650157 | Bacteroides sp. HF-5287               |
| 0.01 | 5    | 5 S    | 2755405 | Bacteroides sp. CACC 737              |
| 0    | 1    | 1 S    | 2650158 | Bacteroides sp. HF-5141               |
| 0    | 1    | 1 S    | 2715212 | Bacteroides sp. CBA7301               |
| 0    | 1    | 1 S    | 2763022 | Bacteroides sp. M10                   |
| 0.07 | 40   | 40 S   | 28116   | Bacteroides ovatus                    |
| 0.07 | 38   | 38 S   | 28111   | Bacteroides eggertii                  |
| 0.06 | 35   | 35 S   | 246787  | Bacteroides cellulosilyticus          |
| 0.05 | 27   | 27 S   | 818     | Bacteroides thetaiotaomicron          |
| 0.02 | 10   | 8 S    | 371601  | Bacteroides xylanisolvens             |
| 0    | 2    | 2 S1   | 657309  | Bacteroides xylanisolvens XB1A        |
| 0.02 | 9    | 9 S    | 47678   | Bacteroides caccae                    |
| 0.01 | 7    | 6 S    | 817     | Bacteroides fragilis                  |
| 0    | 1    | 1 S1   | 295405  | Bacteroides fragilis YCH46            |
| 0.01 | 7    | 7 S    | 329854  | Bacteroides intestinalis              |
| 0    | 2    | 0 S    | 290053  | Bacteroides helcogenes                |
| 0    | 2    | 2 S1   | 693979  | Bacteroides helcogenes P 36-108       |
| 0    | 2    | 2 S    | 1796613 | Bacteroides caecimuris                |
| 0    | 1    | 1 S    | 28113   | Bacteroides heparinolyticus           |
| 0.59 | 328  | 0 O1   | 333046  | Bacteroidales incertae sedis          |
| 0.59 | 328  | 35 G   | 909656  | Phocaeicola                           |
| 0.28 | 154  | 25 S   | 357276  | Phocaeicola dorei                     |
| 0.23 | 129  | 129 S1 | 997877  | Bacteroides dorei CL03T12C01          |
| 0.25 | 139  | 139 S  | 821     | Phocaeicola vulgatus                  |
| 0.2  | 111  | 1 F    | 1853231 | Odoribacteraceae                      |
| 0.14 | 79   | 2 G    | 574697  | Butyrlicimonas                        |
| 0.13 | 74   | 74 S   | 544645  | Butyrlicimonas virosa                 |
| 0.01 | 3    | 3 S    | 2093856 | Butyrlicimonas faecalis               |
| 0.06 | 31   | 0 G    | 283168  | Odoribacter                           |
| 0.06 | 31   | 31 S   | 28118   | Odoribacter splanchnicus              |
| 0.09 | 53   | 0 F    | 171550  | Rikenellaceae                         |
| 0.09 | 53   | 1 G    | 239759  | Alistipes                             |
| 0.03 | 17   | 0 S    | 328813  | Alistipes onderdonkii                 |
| 0.03 | 17   | 17 S1  | 2585117 | Alistipes onderdonkii subsp. vulgaris |
| 0.03 | 16   | 0 S    | 328814  | Alistipes shahii                      |
| 0.03 | 16   | 16 S1  | 717959  | Alistipes shahii WAL 8301             |
| 0.02 | 9    | 0 S    | 214856  | Alistipes finegoldii                  |
| 0.02 | 9    | 9 S1   | 679935  | Alistipes finegoldii DSM 17242        |
| 0.01 | 8    | 8 S    | 2585118 | Alistipes communis                    |
| 0    | 2    | 2 S    | 2585119 | Alistipes dispar                      |
| 0.07 | 39   | 0 F    | 171552  | Prevotellaceae                        |
| 0.07 | 39   | 0 G    | 838     | Prevotella                            |
| 0.07 | 38   | 38 S   | 165179  | Prevotella copri                      |
| 0    | 1    | 1 S    | 28132   | Prevotella melaninogenica             |
| 0.01 | 7    | 0 F    | 2005525 | Tannerellaceae                        |
| 0.01 | 7    | 3 G    | 375288  | Parabacteroides                       |
| 0    | 2    | 2 S    | 823     | Parabacteroides distasonis            |
| 0    | 2    | 2 S    | 328812  | Parabacteroides goldsteinii           |
| 0    | 2    | 0 F    | 2005519 | Barnesiellaceae                       |
| 0    | 2    | 0 G    | 397864  | Barnesiella                           |
| 0    | 2    | 0 S    | 397865  | Barnesiella viscericola               |
| 0    | 2    | 2 S1   | 880074  | Barnesiella viscericola DSM 18177     |
| 0    | 1    | 0 F    | 171551  | Porphyromonadaceae                    |
| 0    | 1    | 0 G    | 836     | Porphyromonas                         |
| 0    | 1    | 1 S    | 837     | Porphyromonas gingivalis              |
| 0.01 | 8    | 0 C    | 768503  | Cytophagia                            |
| 0.01 | 8    | 5 O    | 768507  | Cytophagales                          |
| 0.01 | 3    | 0 F    | 1853232 | Hymenobacteraceae                     |
| 0.01 | 3    | 0 G    | 89966   | Hymenobacter                          |
| 0.01 | 3    | 0 G1   | 2615202 | unclassified Hymenobacter             |
| 0.01 | 3    | 3 S    | 2584940 | Hymenobacter sp. DG01                 |
| 0.01 | 5    | 0 C    | 117743  | Flavobacteriia                        |
| 0.01 | 5    | 0 O    | 200644  | Flavobacteriales                      |
| 0.01 | 4    | 0 F    | 2762318 | Weeksellaceae                         |
| 0.01 | 4    | 0 F1   | 2782232 | Chryseobacterium group                |
| 0.01 | 4    | 0 G    | 59732   | Chryseobacterium                      |
| 0.01 | 4    | 0 G1   | 2593645 | unclassified Chryseobacterium         |
| 0.01 | 4    | 4 S    | 2487065 | Chryseobacterium sp. G0201            |
| 0    | 1    | 0 F    | 49546   | Flavobacteriaceae                     |
| 0    | 1    | 1 G    | 237     | Flavobacterium                        |
| 0.9  | 502  | 1 D1   | 1783272 | Terrabacteria group                   |
| 0.59 | 329  | 3 P    | 1239    | Firmicutes                            |
| 0.29 | 162  | 0 C    | 186801  | Clostridia                            |
| 0.29 | 161  | 12 O   | 186802  | Eubacteriales                         |
| 0.18 | 101  | 3 F    | 216572  | Oscillospiraceae                      |
| 0.16 | 90   | 0 G    | 216851  | Faecalibacterium                      |
| 0.16 | 90   | 51 S   | 853     | Faecalibacterium prausnitzii          |
| 0.04 | 21   | 21 S1  | 657322  | Faecalibacterium prausnitzii SL3/3    |
| 0.03 | 18   | 18 S1  | 718252  | Faecalibacterium prausnitzii L2-6     |
| 0.01 | 6    | 1 G    | 1263    | Ruminococcus                          |
| 0.01 | 5    | 5 S    | 1160721 | Ruminococcus bicirculans              |
| 0    | 1    | 0 G    | 459786  | Oscillibacter                         |
| 0    | 1    | 0 G1   | 2629304 | unclassified Oscillibacter            |
| 0    | 1    | 1 S    | 2109687 | Oscillibacter sp. PEA192              |
| 0    | 1    | 0 G    | 1905344 | Ruthenibacterium                      |
| 0    | 1    | 1 S    | 1550024 | Ruthenibacterium lactatiformans       |
| 0.04 | 21   | 3 F    | 186803  | Lachnospiraceae                       |
| 0.01 | 7    | 0 G    | 841     | Roseburia                             |
| 0.01 | 5    | 5 S    | 166486  | Roseburia intestinalis                |
| 0    | 2    | 2 S    | 301301  | Roseburia hominis                     |

|      |     |       |         |                                         |
|------|-----|-------|---------|-----------------------------------------|
| 0    | 2   | 0 G   | 33042   | Coprococcus                             |
| 0    | 1   | 1 S   | 116085  | Coprococcus catus                       |
| 0    | 1   | 0 G1  | 2684943 | unclassified Coprococcus                |
| 0    | 1   | 1 S   | 751585  | Coprococcus sp. ART55/1                 |
| 0    | 2   | 0 G   | 207244  | Anaerostipes                            |
| 0    | 2   | 2 S   | 649756  | Anaerostipes hadrus                     |
| 0    | 2   | 0 G   | 2719231 | Lacrimispora                            |
| 0    | 2   | 0 S   | 84030   | Lacrimispora saccharolytica             |
| 0    | 2   | 2 S1  | 717608  | [Clostridium] cf. saccharolyticum K10   |
| 0    | 1   | 0 G   | 830     | Butyrivibrio                            |
| 0    | 1   | 1 S   | 831     | Butyrivibrio fibrisolvens               |
| 0    | 1   | 0 G   | 28050   | Lachnospira                             |
| 0    | 1   | 0 S   | 39485   | Lachnospira eligens                     |
| 0    | 1   | 1 S1  | 515620  | [Eubacterium] eligens ATCC 27750        |
| 0    | 1   | 0 G   | 1506553 | Lachnoclostridium                       |
| 0    | 1   | 1 S   | 29347   | [Clostridium] scindens                  |
| 0    | 1   | 0 G   | 1843210 | Anaerocolumna                           |
| 0    | 1   | 1 S   | 433286  | Anaerocolumna cellulositytica           |
| 0    | 1   | 0 G   | 2316020 | Mediterraneibacter                      |
| 0    | 1   | 1 S   | 33038   | [Ruminococcus] gnavus                   |
| 0.03 | 18  | 3 F   | 186804  | Peptostreptococcaceae                   |
| 0.03 | 14  | 1 G   | 1501226 | Romboutsia                              |
| 0.02 | 12  | 12 S  | 1115758 | Romboutsia ilealis                      |
| 0    | 1   | 1 S   | 1507512 | Romboutsia hominis                      |
| 0    | 1   | 0 G   | 2743582 | Peptacetobacter                         |
| 0    | 1   | 1 S   | 89152   | Peptacetobacter hiranonis               |
| 0.01 | 5   | 0 F   | 31979   | Clostridiaceae                          |
| 0.01 | 4   | 1 G   | 1485    | Clostridium                             |
| 0    | 1   | 0 G1  | 2614128 | unclassified Clostridium                |
| 0    | 1   | 1 S   | 641107  | Clostridium sp. DL-VIII                 |
| 0    | 1   | 1 S   | 1504    | Clostridium septicum                    |
| 0    | 1   | 1 S   | 1502    | Clostridium perfringens                 |
| 0    | 1   | 0 G   | 1649459 | Hungatella                              |
| 0    | 1   | 0 S   | 154046  | Hungatella hathewayi                    |
| 0    | 1   | 1 S1  | 742737  | Hungatella hathewayi WAL-18680          |
| 0    | 2   | 0 O1  | 538999  | Eubacteriales incertae sedis            |
| 0    | 2   | 0 G   | 2039302 | Monoglobus                              |
| 0    | 2   | 2 S   | 1981510 | Monoglobus pectinilyticus               |
| 0    | 2   | 0 F   | 990719  | Christensenellaceae                     |
| 0    | 2   | 0 G   | 990721  | Christensenella                         |
| 0    | 1   | 1 S   | 626937  | Christensenella minuta                  |
| 0    | 1   | 0 G1  | 2649046 | unclassified Christensenella            |
| 0    | 1   | 1 S   | 2086585 | Christensenella sp. Marseille-P3954     |
| 0    | 1   | 0 O   | 485256  | Natranaerobiales                        |
| 0    | 1   | 0 F   | 485255  | Natranaerobiaceae                       |
| 0    | 1   | 0 G   | 375928  | Natranaerobius                          |
| 0    | 1   | 0 S   | 375929  | Natranaerobius thermophilus             |
| 0    | 1   | 1 S1  | 457570  | Natranaerobius thermophilus JW/NM-WN-LF |
| 0.17 | 95  | 0 C   | 526524  | Erysipelotrichia                        |
| 0.17 | 95  | 0 O   | 526525  | Erysipelotrichales                      |
| 0.17 | 93  | 0 F   | 2810281 | Turicibacteraceae                       |
| 0.17 | 93  | 0 G   | 191303  | Turicibacter                            |
| 0.12 | 65  | 65 S  | 154288  | Turicibacter sanguinis                  |
| 0.05 | 28  | 0 G1  | 2638206 | unclassified Turicibacter               |
| 0.05 | 28  | 28 S  | 1712675 | Turicibacter sp. H121                   |
| 0    | 2   | 0 F   | 128827  | Erysipelotrichaceae                     |
| 0    | 1   | 0 G   | 1918538 | Longibaculum                            |
| 0    | 1   | 0 G1  | 2636055 | unclassified Longibaculum               |
| 0    | 1   | 1 S   | 2584943 | Longibaculum sp. KGM06250               |
| 0    | 1   | 0 G   | 2678885 | Faecalibacillus                         |
| 0    | 1   | 1 S   | 1982626 | Faecalibacillus intestinalis            |
| 0.11 | 63  | 0 C   | 91061   | Bacilli                                 |
| 0.09 | 53  | 0 O   | 1385    | Bacillales                              |
| 0.09 | 50  | 0 F   | 90964   | Staphylococcaceae                       |
| 0.09 | 50  | 3 G   | 1279    | Staphylococcus                          |
| 0.07 | 40  | 40 S  | 1282    | Staphylococcus epidermidis              |
| 0.01 | 3   | 3 S   | 1290    | Staphylococcus hominis                  |
| 0    | 2   | 2 S   | 29388   | Staphylococcus capitis                  |
| 0    | 2   | 2 S   | 1283    | Staphylococcus haemolyticus             |
| 0    | 2   | 0 F   | 186817  | Bacillaceae                             |
| 0    | 2   | 0 G   | 1386    | Bacillus                                |
| 0    | 2   | 0 G1  | 86661   | Bacillus cereus group                   |
| 0    | 2   | 2 S   | 64104   | Bacillus pseudomyoides                  |
| 0    | 1   | 0 O1  | 539002  | Bacillales incertae sedis               |
| 0    | 1   | 0 O2  | 539738  | Bacillales Family XI. Incertae Sedis    |
| 0    | 1   | 0 G   | 1378    | Gemella                                 |
| 0    | 1   | 1 S   | 1379    | Gemella haemolysans                     |
| 0.02 | 10  | 1 O   | 186826  | Lactobacillales                         |
| 0.01 | 7   | 0 F   | 1300    | Streptococcaceae                        |
| 0.01 | 7   | 2 G   | 1301    | Streptococcus                           |
| 0    | 2   | 0 G1  | 2608887 | unclassified Streptococcus              |
| 0    | 2   | 2 S   | 1759399 | Streptococcus sp. A12                   |
| 0    | 1   | 0 S   | 257758  | Streptococcus pseudopneumoniae          |
| 0    | 1   | 1 S1  | 1054460 | Streptococcus pseudopneumoniae IS7493   |
| 0    | 1   | 1 S   | 1304    | Streptococcus salivarius                |
| 0    | 1   | 1 S   | 1343    | Streptococcus vestibularis              |
| 0    | 2   | 0 F   | 81852   | Enterococcaceae                         |
| 0    | 2   | 0 G   | 1350    | Enterococcus                            |
| 0    | 2   | 2 S   | 1351    | Enterococcus faecalis                   |
| 0.01 | 6   | 0 C   | 1737404 | Tissierella                             |
| 0.01 | 6   | 0 O   | 1737405 | Tissierellales                          |
| 0.01 | 6   | 0 F   | 1570339 | Peptoniphilaceae                        |
| 0.01 | 6   | 0 G   | 165779  | Anaerococcus                            |
| 0.01 | 6   | 6 S   | 1870984 | Anaerococcus mediterraneensis           |
| 0.31 | 171 | 0 P   | 201174  | Actinobacteria                          |
| 0.29 | 164 | 0 C   | 1760    | Actinomycetia                           |
| 0.24 | 136 | 0 O   | 85009   | Propionibacteriales                     |
| 0.24 | 133 | 3 F   | 31957   | Propionibacteriaceae                    |
| 0.23 | 130 | 3 G   | 1912216 | Cutibacterium                           |
| 0.22 | 121 | 121 S | 1747    | Cutibacterium acnes                     |
| 0.01 | 5   | 5 S   | 33011   | Cutibacterium granulosum                |
| 0    | 1   | 1 S   | 33010   | Cutibacterium avidum                    |
| 0.01 | 3   | 0 F   | 85015   | Nocardiodaceae                          |
| 0.01 | 3   | 0 G   | 1839    | Nocardioideis                           |

|      |      |        |         |                                    |
|------|------|--------|---------|------------------------------------|
| 0.01 | 3    | 0 G1   | 2615069 | unclassified Nocardioides          |
| 0    | 2    | 2 S    | 2763008 | Nocardioides sp. zg-1228           |
| 0    | 1    | 1 S    | 2017486 | Nocardioides sp. S5                |
| 0.03 | 14   | 0 O    | 85006   | Micrococcales                      |
| 0.01 | 6    | 0 F    | 1268    | Micrococcaceae                     |
| 0.01 | 6    | 0 G    | 32207   | Rothia                             |
| 0.01 | 5    | 5 S    | 172042  | Rothia aeria                       |
| 0    | 1    | 1 S    | 2047    | Rothia dentocariosa                |
| 0.01 | 5    | 0 F    | 85020   | Dermabacteraceae                   |
| 0.01 | 5    | 0 G    | 36739   | Dermabacter                        |
| 0.01 | 5    | 5 S    | 1630135 | Dermabacter vaginalis              |
| 0.01 | 3    | 2 F    | 85023   | Microbacteriaceae                  |
| 0    | 1    | 0 G    | 33882   | Microbacterium                     |
| 0    | 1    | 1 S    | 104336  | Microbacterium foliorum            |
| 0.02 | 9    | 0 O    | 85007   | Corynebacteriales                  |
| 0.02 | 9    | 0 F    | 1653    | Corynebacteriaceae                 |
| 0.02 | 9    | 0 G    | 1716    | Corynebacterium                    |
| 0.01 | 5    | 5 S    | 38304   | Corynebacterium tuberculostearicum |
| 0    | 2    | 2 S    | 161879  | Corynebacterium kroppenstedtii     |
| 0    | 1    | 0 G1   | 2624378 | unclassified Corynebacterium       |
| 0    | 1    | 1 S    | 2778078 | Corynebacterium sp. FDAARGOS 1242  |
| 0    | 1    | 1 S    | 161899  | Corynebacterium singulare          |
| 0.01 | 5    | 0 O    | 85004   | Bifidobacteriales                  |
| 0.01 | 5    | 0 F    | 31953   | Bifidobacteriaceae                 |
| 0.01 | 4    | 0 G    | 1678    | Bifidobacterium                    |
| 0    | 2    | 2 S    | 1681    | Bifidobacterium bifidum            |
| 0    | 1    | 1 S    | 1680    | Bifidobacterium adolescentis       |
| 0    | 1    | 1 S    | 1685    | Bifidobacterium breve              |
| 0    | 1    | 0 G    | 2701    | Gardnerella                        |
| 0    | 1    | 1 S    | 2702    | Gardnerella vaginalis              |
| 0.01 | 7    | 0 C    | 84998   | Coriobacteriia                     |
| 0.01 | 6    | 0 O    | 84999   | Coriobacteriales                   |
| 0.01 | 6    | 0 F    | 84107   | Coriobacteriaceae                  |
| 0.01 | 6    | 0 G    | 102106  | Collinsella                        |
| 0.01 | 6    | 6 S    | 74426   | Collinsella aerofaciens            |
| 0    | 1    | 0 O    | 1643822 | Eggerthellales                     |
| 0    | 1    | 0 F    | 1643826 | Eggerthellaceae                    |
| 0    | 1    | 0 G    | 644652  | Gordonibacter                      |
| 0    | 1    | 0 S    | 471189  | Gordonibacter pamelaee             |
| 0    | 1    | 1 S1   | 657308  | Gordonibacter pamelaee 7-10-1-b    |
| 0    | 1    | 0 P    | 544448  | Tenericutes                        |
| 0    | 1    | 0 C    | 31969   | Mollicutes                         |
| 0    | 1    | 0 O    | 186328  | Entomoplasmatales                  |
| 0    | 1    | 0 F    | 2131    | Spiroplasmataceae                  |
| 0    | 1    | 1 G    | 2132    | Spiroplasma                        |
| 6.63 | 3699 | 2 D    | 2759    | Eukaryota                          |
| 6.59 | 3680 | 0 D1   | 33154   | Opisthokonta                       |
| 6.55 | 3655 | 0 K    | 4751    | Fungi                              |
| 6.55 | 3655 | 0 K1   | 451864  | Dikarya                            |
| 6.54 | 3654 | 0 P    | 5204    | Basidiomycota                      |
| 6.54 | 3654 | 0 P1   | 452284  | Ustilaginomycotina                 |
| 6.54 | 3654 | 0 C    | 1538075 | Malasseziomycetes                  |
| 6.54 | 3654 | 0 O    | 162474  | Malasseziales                      |
| 6.54 | 3654 | 0 F    | 742845  | Malasseziaceae                     |
| 6.54 | 3654 | 0 G    | 55193   | Malassezia                         |
| 6.54 | 3654 | 3654 S | 76775   | Malassezia restricta               |
| 0    | 1    | 0 P    | 4890    | Ascomycota                         |
| 0    | 1    | 0 P1   | 716545  | saccharomyceta                     |
| 0    | 1    | 0 P2   | 147538  | Pezizomycotina                     |
| 0    | 1    | 0 P3   | 716546  | leotiomyceta                       |
| 0    | 1    | 0 P4   | 715962  | dothideomyceta                     |
| 0    | 1    | 0 C    | 147541  | Dothideomycetes                    |
| 0    | 1    | 0 C1   | 451867  | Dothideomycetidae                  |
| 0    | 1    | 0 O    | 2726947 | Mycosphaerellales                  |
| 0    | 1    | 0 F    | 93133   | Mycosphaerellaceae                 |
| 0    | 1    | 0 G    | 1047167 | Zymoseptoria                       |
| 0    | 1    | 0 S    | 1047171 | Zymoseptoria tritici               |
| 0    | 1    | 1 S1   | 336722  | Zymoseptoria tritici IPO323        |
| 0.04 | 25   | 0 K    | 33208   | Metazoa                            |
| 0.04 | 25   | 0 K1   | 6072    | Eumetazoa                          |
| 0.04 | 25   | 0 K2   | 33213   | Bilateria                          |
| 0.04 | 25   | 0 K3   | 33511   | Deuterostomia                      |
| 0.04 | 25   | 0 P    | 7711    | Chordata                           |
| 0.04 | 25   | 0 P1   | 89593   | Craniata                           |
| 0.04 | 25   | 0 P2   | 7742    | Vertebrata                         |
| 0.04 | 25   | 0 P3   | 7776    | Gnathostomata                      |
| 0.04 | 25   | 0 P4   | 117570  | Teleostomi                         |
| 0.04 | 25   | 0 P5   | 117571  | Euteleostomi                       |
| 0.04 | 25   | 0 P6   | 8287    | Sarcopterygii                      |
| 0.04 | 25   | 0 C    | 1338369 | Dipnotetrapodomorpha               |
| 0.04 | 25   | 0 C1   | 32523   | Tetrapoda                          |
| 0.04 | 25   | 0 C2   | 32524   | Amniota                            |
| 0.04 | 25   | 0 C    | 40674   | Mammalia                           |
| 0.04 | 25   | 0 C1   | 32525   | Theria                             |
| 0.04 | 25   | 0 C2   | 9347    | Eutheria                           |
| 0.04 | 25   | 0 C3   | 1437010 | Boreoeutheria                      |
| 0.04 | 25   | 0 C4   | 314146  | Euarchontoglires                   |
| 0.04 | 25   | 0 O    | 9443    | Primates                           |
| 0.04 | 25   | 0 O1   | 376913  | Haplorrhini                        |
| 0.04 | 25   | 0 O2   | 314293  | Simiiformes                        |
| 0.04 | 25   | 0 O3   | 9526    | Catarrhini                         |
| 0.04 | 25   | 0 O4   | 314295  | Hominioidea                        |
| 0.04 | 25   | 0 F    | 9604    | Hominidae                          |
| 0.04 | 25   | 0 F1   | 207598  | Homininae                          |
| 0.04 | 25   | 0 G    | 9605    | Homo                               |
| 0.04 | 25   | 25 S   | 9606    | Homo sapiens                       |
| 0.03 | 17   | 0 K    | 33090   | Viridiplantae                      |
| 0.03 | 17   | 0 P    | 35493   | Streptophyta                       |
| 0.03 | 17   | 0 P1   | 131221  | Streptophytina                     |
| 0.03 | 17   | 0 P2   | 3193    | Embryophyta                        |
| 0.03 | 17   | 0 P3   | 58023   | Tracheophyta                       |
| 0.03 | 17   | 0 P4   | 78536   | Euphyllophyta                      |
| 0.03 | 17   | 0 P5   | 58024   | Spermatophyta                      |
| 0.03 | 17   | 0 C    | 3398    | Magnoliopsida                      |

|      |     |       |         |                                      |
|------|-----|-------|---------|--------------------------------------|
| 0.03 | 17  | 0 C1  | 1437183 | Mesangiospermae                      |
| 0.01 | 8   | 0 C2  | 71240   | eudicotyledons                       |
| 0.01 | 8   | 0 C3  | 91827   | Gunneridae                           |
| 0.01 | 8   | 0 C4  | 1437201 | Pentapetalae                         |
| 0.01 | 5   | 0 C5  | 71275   | rosids                               |
| 0.01 | 4   | 0 C6  | 91835   | fabids                               |
| 0    | 1   | 0 O   | 3502    | Fagales                              |
| 0    | 1   | 0 F   | 3503    | Fagaceae                             |
| 0    | 1   | 0 G   | 3511    | Quercus                              |
| 0    | 1   | 1 S   | 97700   | Quercus lobata                       |
| 0    | 1   | 0 O   | 3744    | Rosales                              |
| 0    | 1   | 0 F   | 3745    | Rosaceae                             |
| 0    | 1   | 0 F1  | 171638  | Rosoideae                            |
| 0    | 1   | 0 F2  | 1176516 | Rosoideae incertae sedis             |
| 0    | 1   | 0 G   | 3764    | Rosa                                 |
| 0    | 1   | 1 S   | 74649   | Rosa chinensis                       |
| 0    | 1   | 0 O   | 72025   | Fabales                              |
| 0    | 1   | 0 F   | 3803    | Fabaceae                             |
| 0    | 1   | 0 F1  | 3814    | Papilionoideae                       |
| 0    | 1   | 0 F2  | 2231393 | 50 kb inversion clade                |
| 0    | 1   | 0 F3  | 2231382 | NPAAA clade                          |
| 0    | 1   | 0 F4  | 2233855 | indigoferoid/millettioid clade       |
| 0    | 1   | 0 F5  | 163735  | Phaseoleae                           |
| 0    | 1   | 0 G   | 3820    | Cajanus                              |
| 0    | 1   | 1 S   | 3821    | Cajanus cajan                        |
| 0    | 1   | 0 O   | 233875  | Celastrales                          |
| 0    | 1   | 0 F   | 4305    | Celastraceae                         |
| 0    | 1   | 0 G   | 123484  | Tripterygium                         |
| 0    | 1   | 1 S   | 458696  | Tripterygium wilfordii               |
| 0    | 1   | 0 C6  | 91834   | rosids incertae sedis                |
| 0    | 1   | 0 O   | 403667  | Vitales                              |
| 0    | 1   | 0 F   | 3602    | Vitaceae                             |
| 0    | 1   | 0 F1  | 2304100 | Viteae                               |
| 0    | 1   | 1 G   | 3603    | Vitis                                |
| 0.01 | 3   | 0 C5  | 71274   | asterids                             |
| 0.01 | 3   | 0 C6  | 91888   | lamiids                              |
| 0.01 | 3   | 0 O   | 4069    | Solanales                            |
| 0.01 | 3   | 0 F   | 4070    | Solanaceae                           |
| 0.01 | 3   | 0 F1  | 424551  | Solanoideae                          |
| 0.01 | 3   | 0 F2  | 424564  | Capsiceae                            |
| 0.01 | 3   | 0 G   | 4071    | Capsicum                             |
| 0.01 | 3   | 3 S   | 4072    | Capsicum annuum                      |
| 0.01 | 5   | 0 C2  | 4447    | Liliopsida                           |
| 0.01 | 5   | 0 C3  | 1437197 | Petrosaviidae                        |
| 0.01 | 5   | 0 C4  | 4734    | commelinids                          |
| 0.01 | 4   | 0 O   | 38820   | Poales                               |
| 0.01 | 4   | 0 F   | 4479    | Poaceae                              |
| 0.01 | 3   | 0 F1  | 359160  | BOP clade                            |
| 0.01 | 3   | 0 F2  | 147368  | Pooideae                             |
| 0.01 | 3   | 0 F3  | 1648038 | Triticodae                           |
| 0.01 | 3   | 0 F4  | 147389  | Triticeae                            |
| 0.01 | 3   | 0 F5  | 1648030 | Triticinae                           |
| 0    | 2   | 0 G   | 4564    | Triticum                             |
| 0    | 2   | 2 S   | 85692   | Triticum dicoccoides                 |
| 0    | 1   | 0 G   | 4480    | Aegilops                             |
| 0    | 1   | 0 S   | 37682   | Aegilops tauschii                    |
| 0    | 1   | 1 S1  | 200361  | Aegilops tauschii subsp. strangulata |
| 0    | 1   | 0 F1  | 147370  | PACMAD clade                         |
| 0    | 1   | 0 F2  | 147369  | Panicoideae                          |
| 0    | 1   | 0 F3  | 1648033 | Andropogonodae                       |
| 0    | 1   | 0 F4  | 147429  | Andropogoneae                        |
| 0    | 1   | 0 F5  | 1648029 | Tripsacinae                          |
| 0    | 1   | 0 G   | 4575    | Zea                                  |
| 0    | 1   | 1 S   | 4577    | Zea mays                             |
| 0    | 1   | 0 O   | 4618    | Zingiberales                         |
| 0    | 1   | 0 F   | 4637    | Musaceae                             |
| 0    | 1   | 0 G   | 4640    | Musa                                 |
| 0    | 1   | 0 S   | 4641    | Musa acuminata                       |
| 0    | 1   | 1 S1  | 214687  | Musa acuminata subsp. malaccensis    |
| 0.01 | 4   | 0 O   | 41768   | Ranunculales                         |
| 0.01 | 4   | 0 F   | 3465    | Papaveraceae                         |
| 0.01 | 4   | 0 F1  | 1462614 | Papaveroideae                        |
| 0.01 | 4   | 0 G   | 3468    | Papaver                              |
| 0.01 | 4   | 4 S   | 3469    | Papaver somniferum                   |
| 1.16 | 647 | 0 D   | 10239   | Viruses                              |
| 1.16 | 647 | 0 D1  | 2731341 | Duplodnaviria                        |
| 1.16 | 647 | 0 D2  | 2731360 | Heunggongvirae                       |
| 1.16 | 647 | 0 P   | 2731618 | Uroviricota                          |
| 1.16 | 647 | 0 C   | 2731619 | Caudoviricetes                       |
| 1.16 | 647 | 0 O   | 28883   | Caudovirales                         |
| 1.12 | 626 | 0 F   | 10744   | Podoviridae                          |
| 1.12 | 626 | 0 F1  | 196895  | unclassified Podoviridae             |
| 1.12 | 626 | 0 F2  | 1978007 | crAss-like viruses                   |
| 1.12 | 626 | 0 F3  | 2315857 | environmental samples                |
| 1.12 | 626 | 626 S | 1211417 | uncultured crAssphage                |
| 0.04 | 21  | 0 F   | 10699   | Siphoviridae                         |
| 0.02 | 10  | 1 G   | 186532  | Cedrovirus                           |
| 0.01 | 7   | 4 G1  | 329156  | unclassified Cedrovirus              |
| 0    | 2   | 2 S   | 1862960 | Lactococcus phage M5938              |
| 0    | 1   | 1 S   | 1862959 | Lactococcus phage D4412              |
| 0    | 2   | 2 S   | 36343   | Lactococcus virus bIL67              |
| 0.02 | 9   | 2 G   | 1623305 | Skunavirus                           |
| 0.01 | 7   | 3 G1  | 2050979 | unclassified Skunavirus              |
| 0    | 2   | 2 S   | 2029660 | Lactococcus phage 30804              |
| 0    | 1   | 1 S   | 39838   | Lactococcus phage 936                |
| 0    | 1   | 1 S   | 2029671 | Lactococcus phage 66901              |
| 0    | 1   | 1 G   | 1982251 | Pahexavirus                          |
| 0    | 1   | 1 G   | 1623304 | Moineauvirus                         |
