# Supplementary material for: Investigating the Human Intestinal DNA Virome and Predicting Disease-Associated Virus–Host Interactions in Severe Myalgic Encephalomyelitis/Chronic Fatigue Syndrome (ME/CFS)
Source: MDPI journal article supplement (doi:10.3390/ijms242417267), 2023-12-08
Supplement: s1 [file s1]

Table S4. Provirus\_and\_plasmid\_detections

Table S4-1. VLP\_provirus\_genomad

| seq_name                            | n_genes_with_taxonomy | agreement | taxid | lineage                                                                               |
|-------------------------------------|-----------------------|-----------|-------|---------------------------------------------------------------------------------------|
| S17_vs_110666 provirus_6805_70348   | 58                    | 1         | 2561  | Viruses;Duplodnaviria;Heunggongvirae;Uroviricota;Caudoviricetes                       |
| S9_vf_13507 provirus_13823_120230   | 88                    | 1         | 2561  | Viruses;Duplodnaviria;Heunggongvirae;Uroviricota;Caudoviricetes                       |
| S9_vs_46498 provirus_1704_20897     | 20                    | 1         | 2561  | Viruses;Duplodnaviria;Heunggongvirae;Uroviricota;Caudoviricetes                       |
| S9_vs_67792 provirus_23562_67089    | 41                    | 1         | 2561  | Viruses;Duplodnaviria;Heunggongvirae;Uroviricota;Caudoviricetes                       |
| S9_vs_90727 provirus_109214_150749  | 38                    | 1         | 2561  | Viruses;Duplodnaviria;Heunggongvirae;Uroviricota;Caudoviricetes                       |
| S11_vs_45658 provirus_1_50991       | 48                    | 1         | 2561  | Viruses;Duplodnaviria;Heunggongvirae;Uroviricota;Caudoviricetes                       |
| S11_vs_48109 provirus_19503_33025   | 11                    | 1         | 2561  | Viruses;Duplodnaviria;Heunggongvirae;Uroviricota;Caudoviricetes                       |
| S11_vs_48109 provirus_37443_52410   | 17                    | 1         | 2561  | Viruses;Duplodnaviria;Heunggongvirae;Uroviricota;Caudoviricetes                       |
| S11_vs_82331 provirus_1_39593       | 24                    | 1         | 2561  | Viruses;Duplodnaviria;Heunggongvirae;Uroviricota;Caudoviricetes                       |
| S13_vs_9438 provirus_1_26027        | 15                    | 1         | 2561  | Viruses;Duplodnaviria;Heunggongvirae;Uroviricota;Caudoviricetes                       |
| S13_vs_23314 provirus_1_43630       | 42                    | 1         | 2561  | Viruses;Duplodnaviria;Heunggongvirae;Uroviricota;Caudoviricetes                       |
| S13_vs_26756 provirus_1_36490       | 34                    | 1         | 2561  | Viruses;Duplodnaviria;Heunggongvirae;Uroviricota;Caudoviricetes                       |
| S13_vs_30101 provirus_4484_51177    | 33                    | 0.9912    | 2561  | Viruses;Duplodnaviria;Heunggongvirae;Uroviricota;Caudoviricetes                       |
| S13_vs_30167 provirus_1_53839       | 46                    | 1         | 2561  | Viruses;Duplodnaviria;Heunggongvirae;Uroviricota;Caudoviricetes                       |
| S13_vs_33947 provirus_1_26796       | 14                    | 1         | 2561  | Viruses;Duplodnaviria;Heunggongvirae;Uroviricota;Caudoviricetes                       |
| S13_vs_35816 provirus_9638_57224    | 59                    | 1         | 2561  | Viruses;Duplodnaviria;Heunggongvirae;Uroviricota;Caudoviricetes                       |
| S13_vs_45488 provirus_49188_88826   | 27                    | 1         | 2561  | Viruses;Duplodnaviria;Heunggongvirae;Uroviricota;Caudoviricetes                       |
| S13_vs_67429 provirus_51626_91295   | 36                    | 1         | 2561  | Viruses;Duplodnaviria;Heunggongvirae;Uroviricota;Caudoviricetes                       |
| S13_vs_114213 provirus_1_28952      | 23                    | 1         | 2561  | Viruses;Duplodnaviria;Heunggongvirae;Uroviricota;Caudoviricetes                       |
| S14_vs_66139 provirus_119631_178690 | 40                    | 1         | 2561  | Viruses;Duplodnaviria;Heunggongvirae;Uroviricota;Caudoviricetes                       |
| S14_vs_66208 provirus_10049_67174   | 49                    | 1         | 2561  | Viruses;Duplodnaviria;Heunggongvirae;Uroviricota;Caudoviricetes                       |
| S14_vs_96111 provirus_1_24143       | 26                    | 1         | 2561  | Viruses;Duplodnaviria;Heunggongvirae;Uroviricota;Caudoviricetes                       |
| S14_vs_74067 provirus_149062_181135 | 27                    | 1         | 2561  | Viruses;Duplodnaviria;Heunggongvirae;Uroviricota;Caudoviricetes                       |
| S14_vs_74067 provirus_193206_252822 | 56                    | 1         | 2561  | Viruses;Duplodnaviria;Heunggongvirae;Uroviricota;Caudoviricetes                       |
| S14_vs_9162 provirus_77661_102634   | 28                    | 1         | 2561  | Viruses;Duplodnaviria;Heunggongvirae;Uroviricota;Caudoviricetes                       |
| S14_vs_112345 provirus_25548_38263  | 8                     | 1         | 2561  | Viruses;Duplodnaviria;Heunggongvirae;Uroviricota;Caudoviricetes                       |
| S14_vs_39266 provirus_8204_37426    | 25                    | 1         | 2561  | Viruses;Duplodnaviria;Heunggongvirae;Uroviricota;Caudoviricetes                       |
| S14_vs_2870 provirus_1_47896        | 42                    | 1         | 2561  | Viruses;Duplodnaviria;Heunggongvirae;Uroviricota;Caudoviricetes                       |
| S14_vs_32499 provirus_16787_41581   | 28                    | 1         | 2561  | Viruses;Duplodnaviria;Heunggongvirae;Uroviricota;Caudoviricetes                       |
| S14_vs_25852 provirus_1_35257       | 9                     | 1         | 2561  | Viruses;Duplodnaviria;Heunggongvirae;Uroviricota;Caudoviricetes                       |
| S14_vs_25852 provirus_71427_107963  | 13                    | 1         | 2561  | Viruses;Duplodnaviria;Heunggongvirae;Uroviricota;Caudoviricetes                       |
| S14_vs_11510 provirus_1_37329       | 10                    | 1         | 2561  | Viruses;Duplodnaviria;Heunggongvirae;Uroviricota;Caudoviricetes                       |
| S14_vs_78164 provirus_1_33442       | 35                    | 1         | 2561  | Viruses;Duplodnaviria;Heunggongvirae;Uroviricota;Caudoviricetes                       |
| S14_vs_70985 provirus_15261_57392   | 12                    | 1         | 2561  | Viruses;Duplodnaviria;Heunggongvirae;Uroviricota;Caudoviricetes                       |
| S14_vs_70985 provirus_96748_158000  | 14                    | 1         | 2561  | Viruses;Duplodnaviria;Heunggongvirae;Uroviricota;Caudoviricetes                       |
| S1_vs_117317 provirus_1_31247       | 49                    | 1         | 2561  | Viruses;Duplodnaviria;Heunggongvirae;Uroviricota;Caudoviricetes                       |
| S3_vf_106401 provirus_6294_39808    | 21                    | 1         | 2561  | Viruses;Duplodnaviria;Heunggongvirae;Uroviricota;Caudoviricetes                       |
| S3_vs_119605 provirus_10462_56346   | 45                    | 1         | 2561  | Viruses;Duplodnaviria;Heunggongvirae;Uroviricota;Caudoviricetes                       |
| S3_vs_9158 provirus_1_28511         | 24                    | 0.9779    | 2561  | Viruses;Duplodnaviria;Heunggongvirae;Uroviricota;Caudoviricetes                       |
| S3_vs_64424 provirus_1_35095        | 28                    | 1         | 2561  | Viruses;Duplodnaviria;Heunggongvirae;Uroviricota;Caudoviricetes                       |
| S3_vs_17168 provirus_62162_103365   | 30                    | 1         | 2561  | Viruses;Duplodnaviria;Heunggongvirae;Uroviricota;Caudoviricetes                       |
| S3_vs_42569 provirus_1_55470        | 64                    | 1         | 2561  | Viruses;Duplodnaviria;Heunggongvirae;Uroviricota;Caudoviricetes                       |
| S3_vs_18858 provirus_7640_40921     | 21                    | 1         | 2561  | Viruses;Duplodnaviria;Heunggongvirae;Uroviricota;Caudoviricetes                       |
| S3_vs_68031 provirus_1_31195        | 35                    | 1         | 2561  | Viruses;Duplodnaviria;Heunggongvirae;Uroviricota;Caudoviricetes                       |
| S3_vs_6604 provirus_44093_78643     | 21                    | 1         | 2561  | Viruses;Duplodnaviria;Heunggongvirae;Uroviricota;Caudoviricetes                       |
| S3_vs_70508 provirus_10985_57171    | 30                    | 1         | 2561  | Viruses;Duplodnaviria;Heunggongvirae;Uroviricota;Caudoviricetes                       |
| S3_vs_117894 provirus_1_42562       | 23                    | 1         | 2561  | Viruses;Duplodnaviria;Heunggongvirae;Uroviricota;Caudoviricetes                       |
| S5_vs_30490 provirus_19631_56501    | 24                    | 1         | 2561  | Viruses;Duplodnaviria;Heunggongvirae;Uroviricota;Caudoviricetes                       |
| S5_vs_109527 provirus_86293_134147  | 16                    | 1         | 2561  | Viruses;Duplodnaviria;Heunggongvirae;Uroviricota;Caudoviricetes                       |
| S5_vs_123256 provirus_35835_71330   | 29                    | 1         | 2561  | Viruses;Duplodnaviria;Heunggongvirae;Uroviricota;Caudoviricetes                       |
| S5_vs_117319 provirus_37947_108449  | 65                    | 1         | 2561  | Viruses;Duplodnaviria;Heunggongvirae;Uroviricota;Caudoviricetes                       |
| S5_vs_79992 provirus_1_37142        | 42                    | 1         | 2561  | Viruses;Duplodnaviria;Heunggongvirae;Uroviricota;Caudoviricetes                       |
| S5_vs_20500 provirus_26729_71704    | 33                    | 1         | 2561  | Viruses;Duplodnaviria;Heunggongvirae;Uroviricota;Caudoviricetes                       |
| S5_vs_3501 provirus_235_23805       | 21                    | 1         | 2561  | Viruses;Duplodnaviria;Heunggongvirae;Uroviricota;Caudoviricetes                       |
| S5_vs_124677 provirus_1_41828       | 41                    | 1         | 2561  | Viruses;Duplodnaviria;Heunggongvirae;Uroviricota;Caudoviricetes                       |
| S5_vs_130294 provirus_21565_31442   | 9                     | 1         | 2561  | Viruses;Duplodnaviria;Heunggongvirae;Uroviricota;Caudoviricetes                       |
| S5_vs_80496 provirus_58106_119911   | 51                    | 1         | 2561  | Viruses;Duplodnaviria;Heunggongvirae;Uroviricota;Caudoviricetes                       |
| S5_vs_142195 provirus_1_52517       | 17                    | 1         | 2561  | Viruses;Duplodnaviria;Heunggongvirae;Uroviricota;Caudoviricetes                       |
| S5_vs_9747 provirus_14158_64437     | 20                    | 1         | 2561  | Viruses;Duplodnaviria;Heunggongvirae;Uroviricota;Caudoviricetes                       |
| S5_vs_21778 provirus_68731_157098   | 14                    | 1         | 2561  | Viruses;Duplodnaviria;Heunggongvirae;Uroviricota;Caudoviricetes                       |
| S5_vs_131510 provirus_92040_133423  | 42                    | 1         | 2561  | Viruses;Duplodnaviria;Heunggongvirae;Uroviricota;Caudoviricetes                       |
| S5_vs_46394 provirus_33205_42387    | 9                     | 1         | 2561  | Viruses;Duplodnaviria;Heunggongvirae;Uroviricota;Caudoviricetes                       |
| S5_vs_40848 provirus_22909_78371    | 40                    | 1         | 2561  | Viruses;Duplodnaviria;Heunggongvirae;Uroviricota;Caudoviricetes                       |
| S5_vs_72532 provirus_8356_50725     | 36                    | 1         | 2561  | Viruses;Duplodnaviria;Heunggongvirae;Uroviricota;Caudoviricetes                       |
| S5_vs_77593 provirus_49321_99338    | 54                    | 1         | 2561  | Viruses;Duplodnaviria;Heunggongvirae;Uroviricota;Caudoviricetes                       |
| S5_vs_138980 provirus_1_47926       | 40                    | 1         | 2561  | Viruses;Duplodnaviria;Heunggongvirae;Uroviricota;Caudoviricetes                       |
| S5_vs_74199 provirus_14632_30526    | 9                     | 1         | 2561  | Viruses;Duplodnaviria;Heunggongvirae;Uroviricota;Caudoviricetes                       |
| S5_vs_76500 provirus_1_36552        | 29                    | 1         | 2561  | Viruses;Duplodnaviria;Heunggongvirae;Uroviricota;Caudoviricetes                       |
| S7_vf_36627 provirus_69_11085       | 11                    | 1         | 2561  | Viruses;Duplodnaviria;Heunggongvirae;Uroviricota;Caudoviricetes                       |
| S7_vs_11081 provirus_1_46169        | 41                    | 1         | 2561  | Viruses;Duplodnaviria;Heunggongvirae;Uroviricota;Caudoviricetes                       |
| S7_vs_16344 provirus_1_34983        | 32                    | 1         | 2561  | Viruses;Duplodnaviria;Heunggongvirae;Uroviricota;Caudoviricetes                       |
| S7_vs_47050 provirus_1_34528        | 29                    | 1         | 2561  | Viruses;Duplodnaviria;Heunggongvirae;Uroviricota;Caudoviricetes                       |
| S7_vs_49426 provirus_19260_57556    | 30                    | 1         | 2561  | Viruses;Duplodnaviria;Heunggongvirae;Uroviricota;Caudoviricetes                       |
| S7_vs_51332 provirus_1_12316        | 11                    | 1         | 2561  | Viruses;Duplodnaviria;Heunggongvirae;Uroviricota;Caudoviricetes                       |
| S7_vs_97737 provirus_53372_63197    | 9                     | 1         | 2561  | Viruses;Duplodnaviria;Heunggongvirae;Uroviricota;Caudoviricetes                       |
| S7_vs_119679 provirus_14434_51206   | 39                    | 1         | 2561  | Viruses;Duplodnaviria;Heunggongvirae;Uroviricota;Caudoviricetes                       |
| S16_vs_19968 provirus_18399_54417   | 27                    | 1         | 2561  | Viruses;Duplodnaviria;Heunggongvirae;Uroviricota;Caudoviricetes                       |
| S16_vs_32764 provirus_43014_55386   | 7                     | 1         | 2561  | Viruses;Duplodnaviria;Heunggongvirae;Uroviricota;Caudoviricetes                       |
| S16_vs_34021 provirus_1_29929       | 29                    | 1         | 2561  | Viruses;Duplodnaviria;Heunggongvirae;Uroviricota;Caudoviricetes                       |
| S16_vs_48714 provirus_9547_23424    | 5                     | 0.9272    | 8016  | Viruses;Monodnaviria;Loebvirae;Hofneiviricota;Faserviricetes;Tubulavirales;Inoviridae |
| S16_vs_82116 provirus_1_40122       | 45                    | 0.9942    | 2561  | Viruses;Duplodnaviria;Heunggongvirae;Uroviricota;Caudoviricetes                       |
| S16_vs_89511 provirus_1_61265       | 42                    | 1         | 2561  | Viruses;Duplodnaviria;Heunggongvirae;Uroviricota;Caudoviricetes                       |
| S16_vs_101072 provirus_6845_31451   | 27                    | 1         | 2561  | Viruses;Duplodnaviria;Heunggongvirae;Uroviricota;Caudoviricetes                       |
| S16_vs_107235 provirus_1_37912      | 35                    | 1         | 2561  | Viruses;Duplodnaviria;Heunggongvirae;Uroviricota;Caudoviricetes                       |
| S16_vs_132979 provirus_1_22166      | 19                    | 0.9814    | 2561  | Viruses;Duplodnaviria;Heunggongvirae;Uroviricota;Caudoviricetes                       |
| S16_vs_140468 provirus_7020_20506   | 12                    | 1         | 2561  | Viruses;Duplodnaviria;Heunggongvirae;Uroviricota;Caudoviricetes                       |
| S16_vs_141218 provirus_1_41081      | 30                    | 0.9878    | 2561  | Viruses;Duplodnaviria;Heunggongvirae;Uroviricota;Caudoviricetes                       |
| S16_vs_142561 provirus_46226_82728  | 33                    | 1         | 2561  | Viruses;Duplodnaviria;Heunggongvirae;Uroviricota;Caudoviricetes                       |
| S10_vs_14557 provirus_24735_75557   | 31                    | 1         | 2561  | Viruses;Duplodnaviria;Heunggongvirae;Uroviricota;Caudoviricetes                       |
| S12_vf_60224 provirus_3687_54526    | 45                    | 1         | 2561  | Viruses;Duplodnaviria;Heunggongvirae;Uroviricota;Caudoviricetes                       |
| S12_vs_71525 provirus_5502_31779    | 16                    | 1         | 2561  | Viruses;Duplodnaviria;Heunggongvirae;Uroviricota;Caudoviricetes                       |
| S12_vs_142625 provirus_29520_70930  | 33                    | 1         | 2561  | Viruses;Duplodnaviria;Heunggongvirae;Uroviricota;Caudoviricetes                       |
| S12_vs_26336 provirus_16576_67092   | 16                    | 1         | 2561  | Viruses;Duplodnaviria;Heunggongvirae;Uroviricota;Caudoviricetes                       |
| S12_vs_121913 provirus_20147_123530 | 81                    | 1         | 2561  | Viruses;Duplodnaviria;Heunggongvirae;Uroviricota;Caudoviricetes                       |
| S12_vs_153780 provirus_11265_61281  | 31                    | 1         | 2561  | Viruses;Duplodnaviria;Heunggongvirae;Uroviricota;Caudoviricetes                       |
| S12_vs_123620 provirus_40480_78363  | 29                    | 1         | 2561  | Viruses;Duplodnaviria;Heunggongvirae;Uroviricota;Caudoviricetes                       |
| S12_vs_133070 provirus_55125_132222 | 44                    | 1         | 2561  | Viruses;Duplodnaviria;Heunggongvirae;Uroviricota;Caudoviricetes                       |
| S12_vs_172379 provirus_92122_132266 | 25                    | 0.9882    | 2561  | Viruses;Duplodnaviria;Heunggongvirae;Uroviricota;Caudoviricetes                       |
| S12_vs_23796 provirus_1_38428       | 33                    | 1         | 2561  | Viruses;Duplodnaviria;Heunggongvirae;Uroviricota;Caudoviricetes                       |
| S15_vs_42043 provirus_134410_193486 | 49                    | 1         | 2561  | Viruses;Duplodnaviria;Heunggongvirae;Uroviricota;Caudoviricetes                       |
| S15_vs_43913 provirus_11358_44889   | 34                    | 1         | 2561  | Viruses;Duplodnaviria;Heunggongvirae;Uroviricota;Caudoviricetes                       |

|                                    |    |   |      |                                                                 |
|------------------------------------|----|---|------|-----------------------------------------------------------------|
| S15_vs_71968 provirus_18124_39396  | 17 | 1 | 2561 | Viruses;Duplodnaviria;Heunggongvirae;Uroviricota;Caudoviricetes |
| S2_vs_10289 provirus_7396_46594    | 37 | 1 | 2561 | Viruses;Duplodnaviria;Heunggongvirae;Uroviricota;Caudoviricetes |
| S6_vs_9784 provirus_9084_47596     | 38 | 1 | 2561 | Viruses;Duplodnaviria;Heunggongvirae;Uroviricota;Caudoviricetes |
| S6_vs_54606 provirus_1_21709       | 30 | 1 | 2561 | Viruses;Duplodnaviria;Heunggongvirae;Uroviricota;Caudoviricetes |
| S6_vs_29152 provirus_10612_64693   | 57 | 1 | 2561 | Viruses;Duplodnaviria;Heunggongvirae;Uroviricota;Caudoviricetes |
| S6_vs_10314 provirus_44149_83752   | 42 | 1 | 2561 | Viruses;Duplodnaviria;Heunggongvirae;Uroviricota;Caudoviricetes |
| S6_vs_1146 provirus_1_36227        | 36 | 1 | 2561 | Viruses;Duplodnaviria;Heunggongvirae;Uroviricota;Caudoviricetes |
| S6_vs_46039 provirus_1_38172       | 12 | 1 | 2561 | Viruses;Duplodnaviria;Heunggongvirae;Uroviricota;Caudoviricetes |
| S6_vs_46039 provirus_69634_111911  | 14 | 1 | 2561 | Viruses;Duplodnaviria;Heunggongvirae;Uroviricota;Caudoviricetes |
| S6_vs_34453 provirus_4536_65412    | 58 | 1 | 2561 | Viruses;Duplodnaviria;Heunggongvirae;Uroviricota;Caudoviricetes |
| S6_vs_39025 provirus_18844_51286   | 38 | 1 | 2561 | Viruses;Duplodnaviria;Heunggongvirae;Uroviricota;Caudoviricetes |
| S6_vs_39065 provirus_14912_41773   | 9  | 1 | 2561 | Viruses;Duplodnaviria;Heunggongvirae;Uroviricota;Caudoviricetes |
| S8_vf_28956 provirus_172_25419     | 22 | 1 | 2561 | Viruses;Duplodnaviria;Heunggongvirae;Uroviricota;Caudoviricetes |
| S8_vf_12212 provirus_3_31196       | 31 | 1 | 2561 | Viruses;Duplodnaviria;Heunggongvirae;Uroviricota;Caudoviricetes |
| S8_vf_170878 provirus_6035_59917   | 54 | 1 | 2561 | Viruses;Duplodnaviria;Heunggongvirae;Uroviricota;Caudoviricetes |
| S8_vs_149700 provirus_19406_69356  | 42 | 1 | 2561 | Viruses;Duplodnaviria;Heunggongvirae;Uroviricota;Caudoviricetes |
| S8_vs_115958 provirus_68174_127950 | 45 | 1 | 2561 | Viruses;Duplodnaviria;Heunggongvirae;Uroviricota;Caudoviricetes |
| S8_vs_125717 provirus_34678_52956  | 23 | 1 | 2561 | Viruses;Duplodnaviria;Heunggongvirae;Uroviricota;Caudoviricetes |
| S8_vs_4153 provirus_1_12586        | 10 | 1 | 2561 | Viruses;Duplodnaviria;Heunggongvirae;Uroviricota;Caudoviricetes |
| S8_vs_47265 provirus_19038_69505   | 46 | 1 | 2561 | Viruses;Duplodnaviria;Heunggongvirae;Uroviricota;Caudoviricetes |
| S8_vs_179208 provirus_1_52017      | 20 | 1 | 2561 | Viruses;Duplodnaviria;Heunggongvirae;Uroviricota;Caudoviricetes |
| S8_vs_205257 provirus_1_42712      | 28 | 1 | 2561 | Viruses;Duplodnaviria;Heunggongvirae;Uroviricota;Caudoviricetes |

Note:  
Provirus integrated into plasmid

Table S4-2. WMS\_provirus\_genomad

| seq_name                                      | n_genes_with_taxonomy | agreement | taxid | lineage                                                         |
|-----------------------------------------------|-----------------------|-----------|-------|-----------------------------------------------------------------|
| S9-wms-combined_64277 provirus_1_50273        | 40                    | 1         | 2561  | Viruses;Duplodnaviria;Heunggongvirae;Uroviricota;Caudoviricetes |
| S9-wms-combined_53991 provirus_1_38377        | 39                    | 1         | 2561  | Viruses;Duplodnaviria;Heunggongvirae;Uroviricota;Caudoviricetes |
| S9-wms-combined_97755 provirus_1_31801        | 35                    | 1         | 2561  | Viruses;Duplodnaviria;Heunggongvirae;Uroviricota;Caudoviricetes |
| S9-wms-combined_33230 provirus_1_29168        | 30                    | 1         | 2561  | Viruses;Duplodnaviria;Heunggongvirae;Uroviricota;Caudoviricetes |
| S9-wms-combined_124857 provirus_24439_80893   | 56                    | 1         | 2561  | Viruses;Duplodnaviria;Heunggongvirae;Uroviricota;Caudoviricetes |
| S9-wms-combined_28805 provirus_23826_59739    | 38                    | 1         | 2561  | Viruses;Duplodnaviria;Heunggongvirae;Uroviricota;Caudoviricetes |
| S9-wms-combined_93232 provirus_5433_50669     | 48                    | 1         | 2561  | Viruses;Duplodnaviria;Heunggongvirae;Uroviricota;Caudoviricetes |
| S9-wms-combined_109322 provirus_1_43439       | 37                    | 1         | 2561  | Viruses;Duplodnaviria;Heunggongvirae;Uroviricota;Caudoviricetes |
| S9-wms-combined_29611 provirus_307713_413955  | 93                    | 1         | 2561  | Viruses;Duplodnaviria;Heunggongvirae;Uroviricota;Caudoviricetes |
| S9-wms-combined_20485 provirus_49228_90295    | 46                    | 1         | 2561  | Viruses;Duplodnaviria;Heunggongvirae;Uroviricota;Caudoviricetes |
| S9-wms-combined_9931 provirus_43028_90630     | 39                    | 1         | 2561  | Viruses;Duplodnaviria;Heunggongvirae;Uroviricota;Caudoviricetes |
| S9-wms-combined_37587 provirus_1_47703        | 32                    | 1         | 2561  | Viruses;Duplodnaviria;Heunggongvirae;Uroviricota;Caudoviricetes |
| S9-wms-combined_5526 provirus_1_38027         | 32                    | 1         | 2561  | Viruses;Duplodnaviria;Heunggongvirae;Uroviricota;Caudoviricetes |
| S9-wms-combined_76274 provirus_3258_36781     | 35                    | 1         | 2561  | Viruses;Duplodnaviria;Heunggongvirae;Uroviricota;Caudoviricetes |
| S11-wms-combined_193148 provirus_8658_39231   | 9                     | 1         | 2561  | Viruses;Duplodnaviria;Heunggongvirae;Uroviricota;Caudoviricetes |
| S11-wms-combined_179605 provirus_18936_43615  | 24                    | 1         | 2561  | Viruses;Duplodnaviria;Heunggongvirae;Uroviricota;Caudoviricetes |
| S11-wms-combined_83571 provirus_9777_40621    | 36                    | 1         | 2561  | Viruses;Duplodnaviria;Heunggongvirae;Uroviricota;Caudoviricetes |
| S11-wms-combined_125176 provirus_1_23922      | 22                    | 1         | 2561  | Viruses;Duplodnaviria;Heunggongvirae;Uroviricota;Caudoviricetes |
| S11-wms-combined_236214 provirus_60975_93358  | 29                    | 1         | 2561  | Viruses;Duplodnaviria;Heunggongvirae;Uroviricota;Caudoviricetes |
| S11-wms-combined_264050 provirus_28059_77647  | 49                    | 1         | 2561  | Viruses;Duplodnaviria;Heunggongvirae;Uroviricota;Caudoviricetes |
| S11-wms-combined_140009 provirus_19523_54887  | 37                    | 1         | 2561  | Viruses;Duplodnaviria;Heunggongvirae;Uroviricota;Caudoviricetes |
| S11-wms-combined_168048 provirus_1_41217      | 31                    | 1         | 2561  | Viruses;Duplodnaviria;Heunggongvirae;Uroviricota;Caudoviricetes |
| S11-wms-combined_3507 provirus_29062_70964    | 52                    | 1         | 2561  | Viruses;Duplodnaviria;Heunggongvirae;Uroviricota;Caudoviricetes |
| S11-wms-combined_101337 provirus_1_25287      | 19                    | 1         | 2561  | Viruses;Duplodnaviria;Heunggongvirae;Uroviricota;Caudoviricetes |
| S11-wms-combined_73204 provirus_23691_55764   | 27                    | 1         | 2561  | Viruses;Duplodnaviria;Heunggongvirae;Uroviricota;Caudoviricetes |
| S11-wms-combined_198512 provirus_3772_41546   | 31                    | 1         | 2561  | Viruses;Duplodnaviria;Heunggongvirae;Uroviricota;Caudoviricetes |
| S11-wms-combined_267993 provirus_1_65458      | 54                    | 1         | 2561  | Viruses;Duplodnaviria;Heunggongvirae;Uroviricota;Caudoviricetes |
| S11-wms-combined_116589 provirus_12509_25615  | 10                    | 1         | 2561  | Viruses;Duplodnaviria;Heunggongvirae;Uroviricota;Caudoviricetes |
| S11-wms-combined_48246 provirus_1_44551       | 43                    | 1         | 2561  | Viruses;Duplodnaviria;Heunggongvirae;Uroviricota;Caudoviricetes |
| S11-wms-combined_63818 provirus_8325_62965    | 45                    | 1         | 2561  | Viruses;Duplodnaviria;Heunggongvirae;Uroviricota;Caudoviricetes |
| S11-wms-combined_215723 provirus_1_42332      | 30                    | 1         | 2561  | Viruses;Duplodnaviria;Heunggongvirae;Uroviricota;Caudoviricetes |
| S11-wms-combined_92114 provirus_1_26924       | 20                    | 1         | 2561  | Viruses;Duplodnaviria;Heunggongvirae;Uroviricota;Caudoviricetes |
| S11-wms-combined_120257 provirus_8529_35507   | 33                    | 1         | 2561  | Viruses;Duplodnaviria;Heunggongvirae;Uroviricota;Caudoviricetes |
| S11-wms-combined_217790 provirus_1_43023      | 13                    | 1         | 2561  | Viruses;Duplodnaviria;Heunggongvirae;Uroviricota;Caudoviricetes |
| S11-wms_32691 provirus_3_142121               | 9                     | 1         | 2561  | Viruses;Duplodnaviria;Heunggongvirae;Uroviricota;Caudoviricetes |
| S1-wms-combined_52708 provirus_6059_16025     | 9                     | 1         | 2561  | Viruses;Duplodnaviria;Heunggongvirae;Uroviricota;Caudoviricetes |
| S1-wms-combined_68998 provirus_3499_56973     | 63                    | 1         | 2561  | Viruses;Duplodnaviria;Heunggongvirae;Uroviricota;Caudoviricetes |
| S1-wms-combined_102801 provirus_3620_28850    | 7                     | 1         | 2561  | Viruses;Duplodnaviria;Heunggongvirae;Uroviricota;Caudoviricetes |
| S1-wms-combined_302166 provirus_11917_75458   | 42                    | 1         | 2561  | Viruses;Duplodnaviria;Heunggongvirae;Uroviricota;Caudoviricetes |
| S1-wms-combined_285012 provirus_1_46216       | 53                    | 1         | 2561  | Viruses;Duplodnaviria;Heunggongvirae;Uroviricota;Caudoviricetes |
| S1-wms-combined_220022 provirus_1_85675       | 4                     | 1         | 2561  | Viruses;Duplodnaviria;Heunggongvirae;Uroviricota;Caudoviricetes |
| S1-wms-combined_220022 provirus_128734_155946 | 4                     | 1         | 2561  | Viruses;Duplodnaviria;Heunggongvirae;Uroviricota;Caudoviricetes |
| S1-wms-combined_23248 provirus_27603_62426    | 36                    | 1         | 2561  | Viruses;Duplodnaviria;Heunggongvirae;Uroviricota;Caudoviricetes |
| S1-wms-combined_304377 provirus_1_66513       | 60                    | 1         | 2561  | Viruses;Duplodnaviria;Heunggongvirae;Uroviricota;Caudoviricetes |
| S1-wms-combined_57370 provirus_1_21189        | 19                    | 1         | 2561  | Viruses;Duplodnaviria;Heunggongvirae;Uroviricota;Caudoviricetes |
| S1-wms-combined_107766 provirus_1_36184       | 27                    | 1         | 2561  | Viruses;Duplodnaviria;Heunggongvirae;Uroviricota;Caudoviricetes |
| S1-wms-combined_92523 provirus_13796_31793    | 13                    | 1         | 2561  | Viruses;Duplodnaviria;Heunggongvirae;Uroviricota;Caudoviricetes |
| S1-wms-combined_331544 provirus_1_23231       | 21                    | 1         | 2561  | Viruses;Duplodnaviria;Heunggongvirae;Uroviricota;Caudoviricetes |
| S1-wms-combined_85225 provirus_1_39579        | 48                    | 1         | 2561  | Viruses;Duplodnaviria;Heunggongvirae;Uroviricota;Caudoviricetes |
| S1-wms-combined_136097 provirus_8755_19804    | 10                    | 1         | 2561  | Viruses;Duplodnaviria;Heunggongvirae;Uroviricota;Caudoviricetes |
| S1-wms-combined_307323 provirus_1_42035       | 40                    | 1         | 2561  | Viruses;Duplodnaviria;Heunggongvirae;Uroviricota;Caudoviricetes |
| S1-wms-combined_94988 provirus_10302_22992    | 10                    | 1         | 2561  | Viruses;Duplodnaviria;Heunggongvirae;Uroviricota;Caudoviricetes |
| S5-wms-combined_18356 provirus_1_22757        | 23                    | 1         | 2561  | Viruses;Duplodnaviria;Heunggongvirae;Uroviricota;Caudoviricetes |
| S5-wms-combined_161191 provirus_134452_157515 | 44                    | 1         | 2561  | Viruses;Duplodnaviria;Heunggongvirae;Uroviricota;Caudoviricetes |
| S5-wms-combined_134381 provirus_32274_74956   | 57                    | 1         | 2561  | Viruses;Duplodnaviria;Heunggongvirae;Uroviricota;Caudoviricetes |
| S5-wms-combined_90315 provirus_11740_73154    | 59                    | 1         | 2561  | Viruses;Duplodnaviria;Heunggongvirae;Uroviricota;Caudoviricetes |
| S5-wms-combined_134743 provirus_30511_101552  | 44                    | 0.9919    | 2561  | Viruses;Duplodnaviria;Heunggongvirae;Uroviricota;Caudoviricetes |
| S5-wms-combined_72410 provirus_71571_129551   | 66                    | 1         | 2561  | Viruses;Duplodnaviria;Heunggongvirae;Uroviricota;Caudoviricetes |
| S5-wms-combined_206050 provirus_15780_57403   | 41                    | 1         | 2561  | Viruses;Duplodnaviria;Heunggongvirae;Uroviricota;Caudoviricetes |
| S5-wms-combined_108794 provirus_19443_74905   | 40                    | 1         | 2561  | Viruses;Duplodnaviria;Heunggongvirae;Uroviricota;Caudoviricetes |
| S5-wms-combined_207291 provirus_13547_57653   | 31                    | 1         | 2561  | Viruses;Duplodnaviria;Heunggongvirae;Uroviricota;Caudoviricetes |
| S5-wms-combined_29447 provirus_1_32335        | 37                    | 1         | 2561  | Viruses;Duplodnaviria;Heunggongvirae;Uroviricota;Caudoviricetes |
| S5-wms-combined_83370 provirus_1_42289        | 36                    | 1         | 2561  | Viruses;Duplodnaviria;Heunggongvirae;Uroviricota;Caudoviricetes |
| S5-wms-combined_66662 provirus_52916_98874    | 33                    | 1         | 2561  | Viruses;Duplodnaviria;Heunggongvirae;Uroviricota;Caudoviricetes |
| S5-wms-combined_59064 provirus_35170_77093    | 42                    | 1         | 2561  | Viruses;Duplodnaviria;Heunggongvirae;Uroviricota;Caudoviricetes |
| S5-wms-combined_94482 provirus_9030_59881     | 34                    | 1         | 2561  | Viruses;Duplodnaviria;Heunggongvirae;Uroviricota;Caudoviricetes |
| S5-wms-combined_67650 provirus_42189_77684    | 29                    | 1         | 2561  | Viruses;Duplodnaviria;Heunggongvirae;Uroviricota;Caudoviricetes |
| S5-wms-combined_94786 provirus_4677_40532     | 25                    | 1         | 2561  | Viruses;Duplodnaviria;Heunggongvirae;Uroviricota;Caudoviricetes |
| S5-wms-combined_210959 provirus_13002_159070  | 27                    | 1         | 2561  | Viruses;Duplodnaviria;Heunggongvirae;Uroviricota;Caudoviricetes |
| S5-wms-combined_78434 provirus_1_90452        | 15                    | 1         | 2561  | Viruses;Duplodnaviria;Heunggongvirae;Uroviricota;Caudoviricetes |
| S5-wms-combined_98202 provirus_1_61764        | 20                    | 0.9818    | 2561  | Viruses;Duplodnaviria;Heunggongvirae;Uroviricota;Caudoviricetes |
| S5-wms-combined_26971 provirus_4471_34173     | 35                    | 1         | 2561  | Viruses;Duplodnaviria;Heunggongvirae;Uroviricota;Caudoviricetes |
| S5-wms-combined_178432 provirus_1_33423       | 25                    | 1         | 2561  | Viruses;Duplodnaviria;Heunggongvirae;Uroviricota;Caudoviricetes |
| S5-wms-combined_179241 provirus_5356_19361    | 9                     | 1         | 2561  | Viruses;Duplodnaviria;Heunggongvirae;Uroviricota;Caudoviricetes |
| S5-wms-combined_117213 provirus_1_35094       | 35                    | 1         | 2561  | Viruses;Duplodnaviria;Heunggongvirae;Uroviricota;Caudoviricetes |
| S5-wms_94965 provirus_4329_41461              | 34                    | 1         | 2561  | Viruses;Duplodnaviria;Heunggongvirae;Uroviricota;Caudoviricetes |
| S7-wms-combined_71592 provirus_9021_38751     | 32                    | 1         | 2561  | Viruses;Duplodnaviria;Heunggongvirae;Uroviricota;Caudoviricetes |
| S7-wms-combined_20921 provirus_1_139822       | 92                    | 1         | 2561  | Viruses;Duplodnaviria;Heunggongvirae;Uroviricota;Caudoviricetes |
| S7-wms-combined_62119 provirus_55121_129634   | 73                    | 1         | 2561  | Viruses;Duplodnaviria;Heunggongvirae;Uroviricota;Caudoviricetes |
| S7-wms-combined_185016 provirus_8013_41583    | 35                    | 1         | 2561  | Viruses;Duplodnaviria;Heunggongvirae;Uroviricota;Caudoviricetes |
| S7-wms-combined_174935 provirus_1_23182       | 22                    | 1         | 2561  | Viruses;Duplodnaviria;Heunggongvirae;Uroviricota;Caudoviricetes |
| S7-wms-combined_134458 provirus_1_46614       | 49                    | 1         | 2561  | Viruses;Duplodnaviria;Heunggongvirae;Uroviricota;Caudoviricetes |
| S7-wms-combined_2122 provirus_17514_50765     | 28                    | 1         | 2561  | Viruses;Duplodnaviria;Heunggongvirae;Uroviricota;Caudoviricetes |
| S7-wms-combined_135154 provirus_1_28157       | 17                    | 1         | 2561  | Viruses;Duplodnaviria;Heunggongvirae;Uroviricota;Caudoviricetes |
| S7-wms-combined_238231 provirus_41225_71249   | 26                    | 1         | 2561  | Viruses;Duplodnaviria;Heunggongvirae;Uroviricota;Caudoviricetes |
| S7-wms-combined_43950 provirus_8198_57129     | 41                    | 1         | 2561  | Viruses;Duplodnaviria;Heunggongvirae;Uroviricota;Caudoviricetes |
| S7-wms-combined_3697 provirus_66701_124033    | 46                    | 1         | 2561  | Viruses;Duplodnaviria;Heunggongvirae;Uroviricota;Caudoviricetes |
| S7-wms-combined_157260 provirus_19304_75227   | 58                    | 1         | 2561  | Viruses;Duplodnaviria;Heunggongvirae;Uroviricota;Caudoviricetes |
| S7-wms-combined_74829 provirus_2475_38322     | 29                    | 1         | 2561  | Viruses;Duplodnaviria;Heunggongvirae;Uroviricota;Caudoviricetes |
| S7-wms-combined_14267 provirus_25528_51357    | 23                    | 1         | 2561  | Viruses;Duplodnaviria;Heunggongvirae;Uroviricota;Caudoviricetes |
| S7-wms-combined_167867 provirus_1_81146       | 11                    | 1         | 2561  | Viruses;Duplodnaviria;Heunggongvirae;Uroviricota;Caudoviricetes |
| S7-wms-combined_106253 provirus_1_36567       | 28                    | 0.9688    | 2561  | Viruses;Duplodnaviria;Heunggongvirae;Uroviricota;Caudoviricetes |
| S7-wms-combined_14529 provirus_20870_62786    | 27                    | 1         | 2561  | Viruses;Duplodnaviria;Heunggongvirae;Uroviricota;Caudoviricetes |
| S7-wms-combined_137858 provirus_28744_38569   | 9                     | 1         | 2561  | Viruses;Duplodnaviria;Heunggongvirae;Uroviricota;Caudoviricetes |
| S7-wms-combined_5625 provirus_26522_67320     | 41                    | 1         | 2561  | Viruses;Duplodnaviria;Heunggongvirae;Uroviricota;Caudoviricetes |
| S7-wms-combined_190281 provirus_28520_63064   | 33                    | 1         | 2561  | Viruses;Duplodnaviria;Heunggongvirae;Uroviricota;Caudoviricetes |
| S7-wms-combined_26217 provirus_37948_88555    | 44                    | 1         | 2561  | Viruses;Duplodnaviria;Heunggongvirae;Uroviricota;Caudoviricetes |
| S7-wms-combined_7205 provirus_1_62239         | 58                    | 1         | 2561  | Viruses;Duplodnaviria;Heunggongvirae;Uroviricota;Caudoviricetes |
| S7-wms-combined_72070 provirus_3771_55473     | 32                    | 1         | 2561  | Viruses;Duplodnaviria;Heunggongvirae;Uroviricota;Caudoviricetes |
| S7-wms-combined_136642 provirus_1_17488       | 21                    | 1         | 2561  | Viruses;Duplodnaviria;Heunggongvirae;Uroviricota;Caudoviricetes |
| S7-wms-combined_147158 provirus_1_43742       | 42                    | 1         | 2561  | Viruses;Duplodnaviria;Heunggongvirae;Uroviricota;Caudoviricetes |
| S7-wms-combined_218379 provirus_3331_36800    | 28                    | 1         | 2561  | Viruses;Duplodnaviria;Heunggongvirae;Uroviricota;Caudoviricetes |

|                                                |    |        |      |                                                                 |
|------------------------------------------------|----|--------|------|-----------------------------------------------------------------|
| S7-wms-combined_107679_0 provirus_1_37921      | 39 | 1      | 2561 | Viruses;Duplodnaviria;Heunggongvirae;Uroviricota;Caudoviricetes |
| S7-wms-combined_107679_1 provirus_4391_36183   | 18 | 1      | 2561 | Viruses;Duplodnaviria;Heunggongvirae;Uroviricota;Caudoviricetes |
| S17-wms-combined_233761 provirus_1_38860       | 25 | 1      | 2561 | Viruses;Duplodnaviria;Heunggongvirae;Uroviricota;Caudoviricetes |
| S17-wms-combined_56006 provirus_18810_96019    | 60 | 1      | 2561 | Viruses;Duplodnaviria;Heunggongvirae;Uroviricota;Caudoviricetes |
| S17-wms-combined_56061 provirus_96601_107131   | 9  | 1      | 2561 | Viruses;Duplodnaviria;Heunggongvirae;Uroviricota;Caudoviricetes |
| S17-wms-combined_2234 provirus_16885_70511     | 61 | 1      | 2561 | Viruses;Duplodnaviria;Heunggongvirae;Uroviricota;Caudoviricetes |
| S17-wms-combined_203701 provirus_1_59819       | 21 | 1      | 2561 | Viruses;Duplodnaviria;Heunggongvirae;Uroviricota;Caudoviricetes |
| S17-wms-combined_247494 provirus_1_40245       | 36 | 1      | 2561 | Viruses;Duplodnaviria;Heunggongvirae;Uroviricota;Caudoviricetes |
| S17-wms-combined_126774 provirus_33403_66657   | 6  | 1      | 2561 | Viruses;Duplodnaviria;Heunggongvirae;Uroviricota;Caudoviricetes |
| S17-wms-combined_248321 provirus_1_64257       | 60 | 1      | 2561 | Viruses;Duplodnaviria;Heunggongvirae;Uroviricota;Caudoviricetes |
| S17-wms-combined_248321 provirus_78214_127137  | 61 | 1      | 2561 | Viruses;Duplodnaviria;Heunggongvirae;Uroviricota;Caudoviricetes |
| S17-wms-combined_193958 provirus_41974_101082  | 50 | 1      | 2561 | Viruses;Duplodnaviria;Heunggongvirae;Uroviricota;Caudoviricetes |
| S17-wms-combined_259811 provirus_1_48861       | 60 | 1      | 2561 | Viruses;Duplodnaviria;Heunggongvirae;Uroviricota;Caudoviricetes |
| S17-wms-combined_185239 provirus_13026_23450   | 4  | 1      | 2561 | Viruses;Duplodnaviria;Heunggongvirae;Uroviricota;Caudoviricetes |
| S17-wms-combined_186314 provirus_28354_68895   | 54 | 1      | 2561 | Viruses;Duplodnaviria;Heunggongvirae;Uroviricota;Caudoviricetes |
| S17-wms-combined_162786 provirus_1_130535      | 29 | 1      | 2561 | Viruses;Duplodnaviria;Heunggongvirae;Uroviricota;Caudoviricetes |
| S17-wms-combined_95360 provirus_1_43743        | 30 | 1      | 2561 | Viruses;Duplodnaviria;Heunggongvirae;Uroviricota;Caudoviricetes |
| S17-wms-combined_199746 provirus_311_40236     | 41 | 1      | 2561 | Viruses;Duplodnaviria;Heunggongvirae;Uroviricota;Caudoviricetes |
| S12-wms-combined_334806 provirus_1_39697       | 21 | 1      | 2561 | Viruses;Duplodnaviria;Heunggongvirae;Uroviricota;Caudoviricetes |
| S12-wms-combined_184338 provirus_7702_50077    | 45 | 1      | 2561 | Viruses;Duplodnaviria;Heunggongvirae;Uroviricota;Caudoviricetes |
| S12-wms-combined_368462 provirus_3828_55485    | 40 | 1      | 2561 | Viruses;Duplodnaviria;Heunggongvirae;Uroviricota;Caudoviricetes |
| S12-wms-combined_201125 provirus_169478_224193 | 46 | 1      | 2561 | Viruses;Duplodnaviria;Heunggongvirae;Uroviricota;Caudoviricetes |
| S12-wms-combined_368562 provirus_5352_23237    | 11 | 1      | 2561 | Viruses;Duplodnaviria;Heunggongvirae;Uroviricota;Caudoviricetes |
| S12-wms-combined_117628 provirus_37358_58691   | 22 | 1      | 2561 | Viruses;Duplodnaviria;Heunggongvirae;Uroviricota;Caudoviricetes |
| S12-wms-combined_17617 provirus_14012_54837    | 45 | 1      | 2561 | Viruses;Duplodnaviria;Heunggongvirae;Uroviricota;Caudoviricetes |
| S12-wms-combined_51076 provirus_1_52990        | 7  | 1      | 2561 | Viruses;Duplodnaviria;Heunggongvirae;Uroviricota;Caudoviricetes |
| S12-wms-combined_51076 provirus_63671_110930   | 11 | 0.9503 | 2561 | Viruses;Duplodnaviria;Heunggongvirae;Uroviricota;Caudoviricetes |
| S12-wms-combined_151843 provirus_1_54070       | 53 | 1      | 2561 | Viruses;Duplodnaviria;Heunggongvirae;Uroviricota;Caudoviricetes |
| S12-wms-combined_18287 provirus_31039_78190    | 48 | 1      | 2561 | Viruses;Duplodnaviria;Heunggongvirae;Uroviricota;Caudoviricetes |
| S12-wms-combined_2450 provirus_49617_81938     | 36 | 1      | 2561 | Viruses;Duplodnaviria;Heunggongvirae;Uroviricota;Caudoviricetes |
| S12-wms-combined_320727 provirus_43373_74615   | 26 | 1      | 2561 | Viruses;Duplodnaviria;Heunggongvirae;Uroviricota;Caudoviricetes |
| S12-wms-combined_320727 provirus_86494_158985  | 72 | 1      | 2561 | Viruses;Duplodnaviria;Heunggongvirae;Uroviricota;Caudoviricetes |
| S12-wms-combined_371541 provirus_27093_40221   | 11 | 1      | 2561 | Viruses;Duplodnaviria;Heunggongvirae;Uroviricota;Caudoviricetes |
| S12-wms-combined_120133 provirus_1_28638       | 29 | 1      | 2561 | Viruses;Duplodnaviria;Heunggongvirae;Uroviricota;Caudoviricetes |
| S12-wms-combined_189323 provirus_1_38428       | 33 | 1      | 2561 | Viruses;Duplodnaviria;Heunggongvirae;Uroviricota;Caudoviricetes |
| S12-wms-combined_256299 provirus_6861_53411    | 38 | 1      | 2561 | Viruses;Duplodnaviria;Heunggongvirae;Uroviricota;Caudoviricetes |
| S12-wms-combined_156234 provirus_1_28774       | 30 | 1      | 2561 | Viruses;Duplodnaviria;Heunggongvirae;Uroviricota;Caudoviricetes |
| S12-wms-combined_23517 provirus_1_43179        | 61 | 1      | 2561 | Viruses;Duplodnaviria;Heunggongvirae;Uroviricota;Caudoviricetes |
| S12-wms-combined_375343 provirus_1_29654       | 26 | 1      | 2561 | Viruses;Duplodnaviria;Heunggongvirae;Uroviricota;Caudoviricetes |
| S12-wms-combined_358010 provirus_6040_57083    | 36 | 1      | 2561 | Viruses;Duplodnaviria;Heunggongvirae;Uroviricota;Caudoviricetes |
| S12-wms-combined_358797 provirus_1_26270       | 22 | 1      | 2561 | Viruses;Duplodnaviria;Heunggongvirae;Uroviricota;Caudoviricetes |
| S12-wms-combined_359190 provirus_24842_64793   | 34 | 1      | 2561 | Viruses;Duplodnaviria;Heunggongvirae;Uroviricota;Caudoviricetes |
| S12-wms-combined_328554 provirus_9763_43415    | 32 | 1      | 2561 | Viruses;Duplodnaviria;Heunggongvirae;Uroviricota;Caudoviricetes |
| S12-wms-combined_329242 provirus_1_27761       | 6  | 1      | 2561 | Viruses;Duplodnaviria;Heunggongvirae;Uroviricota;Caudoviricetes |
| S12-wms-combined_313953 provirus_1_52155       | 31 | 1      | 2561 | Viruses;Duplodnaviria;Heunggongvirae;Uroviricota;Caudoviricetes |
| S12-wms-combined_111524 provirus_1_48545       | 17 | 1      | 2561 | Viruses;Duplodnaviria;Heunggongvirae;Uroviricota;Caudoviricetes |
| S12-wms-combined_297545 provirus_1_54974       | 66 | 1      | 2561 | Viruses;Duplodnaviria;Heunggongvirae;Uroviricota;Caudoviricetes |
| S12-wms-combined_129799 provirus_25526_72680   | 52 | 1      | 2561 | Viruses;Duplodnaviria;Heunggongvirae;Uroviricota;Caudoviricetes |
| S12-wms-combined_282594 provirus_1_43487       | 25 | 1      | 2561 | Viruses;Duplodnaviria;Heunggongvirae;Uroviricota;Caudoviricetes |
| S12-wms-combined_147628 provirus_1_66934       | 47 | 1      | 2561 | Viruses;Duplodnaviria;Heunggongvirae;Uroviricota;Caudoviricetes |
| S12-wms-combined_264845 provirus_13087_19738   | 5  | 1      | 2561 | Viruses;Duplodnaviria;Heunggongvirae;Uroviricota;Caudoviricetes |
| S12-wms-combined_299293 provirus_20365_74597   | 49 | 1      | 2561 | Viruses;Duplodnaviria;Heunggongvirae;Uroviricota;Caudoviricetes |
| S12-wms-combined_98046 provirus_43964_89205    | 38 | 1      | 2561 | Viruses;Duplodnaviria;Heunggongvirae;Uroviricota;Caudoviricetes |
| S12-wms-combined_31761 provirus_4908_40932     | 30 | 1      | 2561 | Viruses;Duplodnaviria;Heunggongvirae;Uroviricota;Caudoviricetes |
| S12-wms-combined_368190 provirus_4987_62142    | 68 | 1      | 2561 | Viruses;Duplodnaviria;Heunggongvirae;Uroviricota;Caudoviricetes |
| S12-wms-combined_168259 provirus_1_29820       | 12 | 1      | 2561 | Viruses;Duplodnaviria;Heunggongvirae;Uroviricota;Caudoviricetes |
| S12-wms-combined_270839 provirus_3921_42253    | 29 | 1      | 2561 | Viruses;Duplodnaviria;Heunggongvirae;Uroviricota;Caudoviricetes |
| S12-wms_161239 provirus_5587_25370             | 24 | 1      | 2561 | Viruses;Duplodnaviria;Heunggongvirae;Uroviricota;Caudoviricetes |
| S2-wms-combined_196783 provirus_1_43247        | 38 | 1      | 2561 | Viruses;Duplodnaviria;Heunggongvirae;Uroviricota;Caudoviricetes |
| S2-wms-combined_62519 provirus_6893_41704      | 41 | 1      | 2561 | Viruses;Duplodnaviria;Heunggongvirae;Uroviricota;Caudoviricetes |
| S2-wms-combined_135139 provirus_1_34436        | 9  | 1      | 2561 | Viruses;Duplodnaviria;Heunggongvirae;Uroviricota;Caudoviricetes |
| S2-wms-combined_218002 provirus_41237_76226    | 35 | 1      | 2561 | Viruses;Duplodnaviria;Heunggongvirae;Uroviricota;Caudoviricetes |
| S2-wms-combined_135154 provirus_11137_34738    | 13 | 1      | 2561 | Viruses;Duplodnaviria;Heunggongvirae;Uroviricota;Caudoviricetes |
| S2-wms-combined_93845 provirus_1_41258         | 39 | 1      | 2561 | Viruses;Duplodnaviria;Heunggongvirae;Uroviricota;Caudoviricetes |
| S2-wms-combined_52568 provirus_1_46833         | 39 | 1      | 2561 | Viruses;Duplodnaviria;Heunggongvirae;Uroviricota;Caudoviricetes |
| S2-wms-combined_166665 provirus_1_31971        | 32 | 1      | 2561 | Viruses;Duplodnaviria;Heunggongvirae;Uroviricota;Caudoviricetes |
| S2-wms-combined_229529 provirus_28533_87711    | 49 | 1      | 2561 | Viruses;Duplodnaviria;Heunggongvirae;Uroviricota;Caudoviricetes |
| S2-wms-combined_84608 provirus_18423_96376     | 30 | 1      | 2561 | Viruses;Duplodnaviria;Heunggongvirae;Uroviricota;Caudoviricetes |
| S2-wms-combined_74387 provirus_8639_47478      | 38 | 1      | 2561 | Viruses;Duplodnaviria;Heunggongvirae;Uroviricota;Caudoviricetes |
| S2-wms-combined_147065 provirus_99157_133534   | 36 | 1      | 2561 | Viruses;Duplodnaviria;Heunggongvirae;Uroviricota;Caudoviricetes |
| S2-wms-combined_137119 provirus_23866_96227    | 57 | 1      | 2561 | Viruses;Duplodnaviria;Heunggongvirae;Uroviricota;Caudoviricetes |
| S2-wms-combined_85381 provirus_1_35531         | 30 | 1      | 2561 | Viruses;Duplodnaviria;Heunggongvirae;Uroviricota;Caudoviricetes |
| S2-wms-combined_116221 provirus_11792_43877    | 36 | 1      | 2561 | Viruses;Duplodnaviria;Heunggongvirae;Uroviricota;Caudoviricetes |
| S2-wms-combined_116221 provirus_59302_90374    | 30 | 1      | 2561 | Viruses;Duplodnaviria;Heunggongvirae;Uroviricota;Caudoviricetes |
| S2-wms-combined_157934 provirus_4946_38145     | 38 | 1      | 2561 | Viruses;Duplodnaviria;Heunggongvirae;Uroviricota;Caudoviricetes |
| S2-wms-combined_13246 provirus_142843_195068   | 54 | 1      | 2561 | Viruses;Duplodnaviria;Heunggongvirae;Uroviricota;Caudoviricetes |
| S2-wms-combined_210822 provirus_1_50976        | 18 | 1      | 2561 | Viruses;Duplodnaviria;Heunggongvirae;Uroviricota;Caudoviricetes |
| S2-wms-combined_24549 provirus_1_19009         | 20 | 1      | 2561 | Viruses;Duplodnaviria;Heunggongvirae;Uroviricota;Caudoviricetes |
| S2-wms-combined_24549 provirus_52727_65681     | 13 | 1      | 2561 | Viruses;Duplodnaviria;Heunggongvirae;Uroviricota;Caudoviricetes |
| S2-wms-combined_170845 provirus_1_34623        | 30 | 1      | 2561 | Viruses;Duplodnaviria;Heunggongvirae;Uroviricota;Caudoviricetes |
| S2-wms-combined_159670 provirus_4693_36742     | 33 | 1      | 2561 | Viruses;Duplodnaviria;Heunggongvirae;Uroviricota;Caudoviricetes |
| S2-wms-combined_181391 provirus_93678_123498   | 27 | 1      | 2561 | Viruses;Duplodnaviria;Heunggongvirae;Uroviricota;Caudoviricetes |
| S2-wms-combined_200390 provirus_1_42588        | 37 | 1      | 2561 | Viruses;Duplodnaviria;Heunggongvirae;Uroviricota;Caudoviricetes |
| S2-wms-combined_57293 provirus_12687_28064     | 9  | 1      | 2561 | Viruses;Duplodnaviria;Heunggongvirae;Uroviricota;Caudoviricetes |
| S2-wms-combined_191613 provirus_1_40741        | 24 | 1      | 2561 | Viruses;Duplodnaviria;Heunggongvirae;Uroviricota;Caudoviricetes |
| S2-wms-combined_98888 provirus_46109_107937    | 81 | 1      | 2561 | Viruses;Duplodnaviria;Heunggongvirae;Uroviricota;Caudoviricetes |
| S2-wms-combined_181849 provirus_4199_47914     | 28 | 1      | 2561 | Viruses;Duplodnaviria;Heunggongvirae;Uroviricota;Caudoviricetes |
| S2-wms-combined_99446 provirus_17627_43104     | 25 | 1      | 2561 | Viruses;Duplodnaviria;Heunggongvirae;Uroviricota;Caudoviricetes |
| S2-wms-combined_25727 provirus_4849_37113      | 22 | 1      | 2561 | Viruses;Duplodnaviria;Heunggongvirae;Uroviricota;Caudoviricetes |
| S2-wms-combined_58121 provirus_18687_27276     | 5  | 1      | 2561 | Viruses;Duplodnaviria;Heunggongvirae;Uroviricota;Caudoviricetes |
| S2-wms-combined_140996 provirus_80993_146281   | 65 | 1      | 2561 | Viruses;Duplodnaviria;Heunggongvirae;Uroviricota;Caudoviricetes |
| S2-wms-combined_140996 provirus_204609_222314  | 14 | 1      | 2561 | Viruses;Duplodnaviria;Heunggongvirae;Uroviricota;Caudoviricetes |
| S2-wms-combined_222535 provirus_7864_38886     | 5  | 1      | 2561 | Viruses;Duplodnaviria;Heunggongvirae;Uroviricota;Caudoviricetes |
| S2-wms-combined_58563 provirus_21097_53508     | 35 | 1      | 2561 | Viruses;Duplodnaviria;Heunggongvirae;Uroviricota;Caudoviricetes |
| S2-wms-combined_110215 provirus_1_66879        | 60 | 1      | 2561 | Viruses;Duplodnaviria;Heunggongvirae;Uroviricota;Caudoviricetes |
| S2-wms-combined_5791 provirus_106816_143252    | 34 | 1      | 2561 | Viruses;Duplodnaviria;Heunggongvirae;Uroviricota;Caudoviricetes |
| S2-wms-combined_101826 provirus_12326_53091    | 34 | 1      | 2561 | Viruses;Duplodnaviria;Heunggongvirae;Uroviricota;Caudoviricetes |
| S2-wms-combined_122457 provirus_1_24741        | 30 | 1      | 2561 | Viruses;Duplodnaviria;Heunggongvirae;Uroviricota;Caudoviricetes |
| S2-wms-combined_185494 provirus_1_41920        | 29 | 1      | 2561 | Viruses;Duplodnaviria;Heunggongvirae;Uroviricota;Caudoviricetes |
| S2-wms-combined_225908 provirus_81930_115597   | 26 | 1      | 2561 | Viruses;Duplodnaviria;Heunggongvirae;Uroviricota;Caudoviricetes |
| S2-wms-combined_225908 provirus_180828_195686  | 7  | 1      | 2561 | Viruses;Duplodnaviria;Heunggongvirae;Uroviricota;Caudoviricetes |
| S2-wms-combined_227800 provirus_1_24245        | 25 | 1      | 2561 | Viruses;Duplodnaviria;Heunggongvirae;Uroviricota;Caudoviricetes |
| S2-wms-combined_143737 provirus_1_42150        | 35 | 1      | 2561 | Viruses;Duplodnaviria;Heunggongvirae;Uroviricota;Caudoviricetes |
| S2-wms-combined_7756 provirus_1_48340          | 17 | 1      | 2561 | Viruses;Duplodnaviria;Heunggongvirae;Uroviricota;Caudoviricetes |

|                                               |    |        |      |                                                                 |
|-----------------------------------------------|----|--------|------|-----------------------------------------------------------------|
| S2-wms_124416 provirus_5437_58906             | 48 | 1      | 2561 | Viruses;Duplodnaviria;Heunggongvirae;Uroviricota;Caudoviricetes |
| S2-wms_156439 provirus_1_21599                | 19 | 1      | 2561 | Viruses;Duplodnaviria;Heunggongvirae;Uroviricota;Caudoviricetes |
| S2-wms_107329 provirus_5393_52664             | 55 | 1      | 2561 | Viruses;Duplodnaviria;Heunggongvirae;Uroviricota;Caudoviricetes |
| S2-wms_130687 provirus_27517_69355            | 42 | 0.994  | 2561 | Viruses;Duplodnaviria;Heunggongvirae;Uroviricota;Caudoviricetes |
| S4-wms-combined_118531 provirus_26963_69321   | 33 | 1      | 2561 | Viruses;Duplodnaviria;Heunggongvirae;Uroviricota;Caudoviricetes |
| S4-wms-combined_22012 provirus_3895_27205     | 24 | 1      | 2561 | Viruses;Duplodnaviria;Heunggongvirae;Uroviricota;Caudoviricetes |
| S4-wms-combined_57123 provirus_1_36340        | 18 | 1      | 2561 | Viruses;Duplodnaviria;Heunggongvirae;Uroviricota;Caudoviricetes |
| S4-wms-combined_64632 provirus_24726_57119    | 38 | 1      | 2561 | Viruses;Duplodnaviria;Heunggongvirae;Uroviricota;Caudoviricetes |
| S4-wms-combined_113721 provirus_1_14776       | 10 | 1      | 2561 | Viruses;Duplodnaviria;Heunggongvirae;Uroviricota;Caudoviricetes |
| S4-wms-combined_57963 provirus_66556_101297   | 39 | 1      | 2561 | Viruses;Duplodnaviria;Heunggongvirae;Uroviricota;Caudoviricetes |
| S4-wms-combined_17284 provirus_1_54754        | 44 | 1      | 2561 | Viruses;Duplodnaviria;Heunggongvirae;Uroviricota;Caudoviricetes |
| S4-wms-combined_121978 provirus_55570_110001  | 44 | 1      | 2561 | Viruses;Duplodnaviria;Heunggongvirae;Uroviricota;Caudoviricetes |
| S4-wms-combined_25201 provirus_1_27684        | 32 | 1      | 2561 | Viruses;Duplodnaviria;Heunggongvirae;Uroviricota;Caudoviricetes |
| S4-wms-combined_41490 provirus_33118_73219    | 31 | 1      | 2561 | Viruses;Duplodnaviria;Heunggongvirae;Uroviricota;Caudoviricetes |
| S4-wms-combined_51079 provirus_1_19968        | 22 | 1      | 2561 | Viruses;Duplodnaviria;Heunggongvirae;Uroviricota;Caudoviricetes |
| S4-wms_50475 provirus_24295_99597             | 77 | 0.9974 | 2561 | Viruses;Duplodnaviria;Heunggongvirae;Uroviricota;Caudoviricetes |
| S6-wms-combined_41246 provirus_15790_40602    | 5  | 0.8534 | 2561 | Viruses;Duplodnaviria;Heunggongvirae;Uroviricota;Caudoviricetes |
| S6-wms-combined_135223 provirus_91822_139676  | 16 | 1      | 2561 | Viruses;Duplodnaviria;Heunggongvirae;Uroviricota;Caudoviricetes |
| S6-wms-combined_88414 provirus_44149_78550    | 41 | 1      | 2561 | Viruses;Duplodnaviria;Heunggongvirae;Uroviricota;Caudoviricetes |
| S6-wms-combined_82597 provirus_164408_202920  | 38 | 1      | 2561 | Viruses;Duplodnaviria;Heunggongvirae;Uroviricota;Caudoviricetes |
| S6-wms-combined_118427 provirus_96034_109457  | 12 | 1      | 2561 | Viruses;Duplodnaviria;Heunggongvirae;Uroviricota;Caudoviricetes |
| S6-wms-combined_118427 provirus_117014_176709 | 53 | 1      | 2561 | Viruses;Duplodnaviria;Heunggongvirae;Uroviricota;Caudoviricetes |
| S6-wms-combined_72228 provirus_24529_52555    | 15 | 1      | 2561 | Viruses;Duplodnaviria;Heunggongvirae;Uroviricota;Caudoviricetes |
| S6-wms-combined_119138 provirus_23040_55482   | 38 | 1      | 2561 | Viruses;Duplodnaviria;Heunggongvirae;Uroviricota;Caudoviricetes |
| S6-wms-combined_8508 provirus_1_42230         | 49 | 1      | 2561 | Viruses;Duplodnaviria;Heunggongvirae;Uroviricota;Caudoviricetes |
| S6-wms-combined_32530 provirus_8460_46060     | 35 | 1      | 2561 | Viruses;Duplodnaviria;Heunggongvirae;Uroviricota;Caudoviricetes |
| S6-wms-combined_126236 provirus_31179_69368   | 37 | 1      | 2561 | Viruses;Duplodnaviria;Heunggongvirae;Uroviricota;Caudoviricetes |
| S6-wms-combined_50721 provirus_71105_115106   | 43 | 1      | 2561 | Viruses;Duplodnaviria;Heunggongvirae;Uroviricota;Caudoviricetes |
| S6-wms-combined_138710 provirus_7149_17026    | 9  | 1      | 2561 | Viruses;Duplodnaviria;Heunggongvirae;Uroviricota;Caudoviricetes |
| S6-wms-combined_56464 provirus_1_23497        | 25 | 0.9875 | 2561 | Viruses;Duplodnaviria;Heunggongvirae;Uroviricota;Caudoviricetes |
| S6-wms-combined_91039 provirus_1_44817        | 38 | 1      | 2561 | Viruses;Duplodnaviria;Heunggongvirae;Uroviricota;Caudoviricetes |
| S8-wms-combined_215102 provirus_23618_66504   | 26 | 1      | 2561 | Viruses;Duplodnaviria;Heunggongvirae;Uroviricota;Caudoviricetes |
| S8-wms-combined_23583 provirus_43975_85815    | 41 | 1      | 2561 | Viruses;Duplodnaviria;Heunggongvirae;Uroviricota;Caudoviricetes |
| S8-wms-combined_48046 provirus_1_29855        | 22 | 1      | 2561 | Viruses;Duplodnaviria;Heunggongvirae;Uroviricota;Caudoviricetes |
| S8-wms-combined_26087 provirus_1_49451        | 33 | 1      | 2561 | Viruses;Duplodnaviria;Heunggongvirae;Uroviricota;Caudoviricetes |
| S8-wms-combined_72911 provirus_1_47687        | 33 | 1      | 2561 | Viruses;Duplodnaviria;Heunggongvirae;Uroviricota;Caudoviricetes |
| S8-wms-combined_49369 provirus_1_39890        | 24 | 1      | 2561 | Viruses;Duplodnaviria;Heunggongvirae;Uroviricota;Caudoviricetes |
| S8-wms-combined_74275 provirus_1_26939        | 25 | 1      | 2561 | Viruses;Duplodnaviria;Heunggongvirae;Uroviricota;Caudoviricetes |
| S8-wms-combined_270362 provirus_10571_69096   | 55 | 1      | 2561 | Viruses;Duplodnaviria;Heunggongvirae;Uroviricota;Caudoviricetes |
| S8-wms-combined_200168 provirus_1_66777       | 45 | 1      | 2561 | Viruses;Duplodnaviria;Heunggongvirae;Uroviricota;Caudoviricetes |
| S8-wms-combined_108917 provirus_9767_70457    | 48 | 1      | 2561 | Viruses;Duplodnaviria;Heunggongvirae;Uroviricota;Caudoviricetes |
| S8-wms-combined_40666 provirus_44493_71582    | 21 | 1      | 2561 | Viruses;Duplodnaviria;Heunggongvirae;Uroviricota;Caudoviricetes |
| S8-wms-combined_169835 provirus_34678_52956   | 23 | 1      | 2561 | Viruses;Duplodnaviria;Heunggongvirae;Uroviricota;Caudoviricetes |
| S8-wms-combined_68780 provirus_22210_73585    | 54 | 1      | 2561 | Viruses;Duplodnaviria;Heunggongvirae;Uroviricota;Caudoviricetes |
| S8-wms-combined_161181 provirus_9043_44282    | 39 | 1      | 2561 | Viruses;Duplodnaviria;Heunggongvirae;Uroviricota;Caudoviricetes |
| S8-wms-combined_246185 provirus_1_35887       | 11 | 1      | 2561 | Viruses;Duplodnaviria;Heunggongvirae;Uroviricota;Caudoviricetes |
| S8-wms_58515 provirus_15402_22507             | 6  | 1      | 2561 | Viruses;Duplodnaviria;Heunggongvirae;Uroviricota;Caudoviricetes |
| S8-wms_48935 provirus_1_52721                 | 54 | 1      | 2561 | Viruses;Duplodnaviria;Heunggongvirae;Uroviricota;Caudoviricetes |

Note:

Provirus integrated into plasmid

Table S4-3. Plasmid\_detection\_genomad

VLP-HQ-vOTUs:

| seq_name      | length | topology            | n_genes | genetic_code | plasmid_score | fdr | n_hallmarks | marker_enrichment |
|---------------|--------|---------------------|---------|--------------|---------------|-----|-------------|-------------------|
| S16_vs_173141 | 3774   | No terminal repeats | 3       | 11           | 0.9899        | NA  | 1           | 0.9293            |
| S5_vs_109527  | 142384 | No terminal repeats | 133     | 11           | 0.9873        | NA  | 0           | 9.1116            |
| S17_vs_52890  | 60210  | No terminal repeats | 53      | 11           | 0.9832        | NA  | 1           | 1.8946            |
| S6_vs_46039   | 111911 | No terminal repeats | 121     | 11           | 0.9823        | NA  | 2           | 0.0396            |
| S14_vs_25852  | 107963 | No terminal repeats | 113     | 11           | 0.9815        | NA  | 3           | 1.395             |
| S12_vs_164056 | 6664   | No terminal repeats | 9       | 11           | 0.9612        | NA  | 0           | 0.5113            |

MWS-HQ-vOTUs:

| seq_name               | length | topology            | n_genes | genetic_code | plasmid_score | fdr | n_hallmarks | marker_enrichment |
|------------------------|--------|---------------------|---------|--------------|---------------|-----|-------------|-------------------|
| S6-wms-combined_135223 | 147913 | No terminal repeats | 138     | 11           | 0.9866        | NA  | 0           | 9.7754            |
| S1-wms-combined_394628 | 10807  | No terminal repeats | 13      | 11           | 0.9673        | NA  | 0           | 1.1593            |
| S2-wms-combined_233107 | 16186  | No terminal repeats | 16      | 11           | 0.9548        | NA  | 1           | 0.4814            |
| S2-wms-combined_115352 | 3640   | No terminal repeats | 6       | 11           | 0.9387        | NA  | 0           | 1.196             |
| S2-wms-combined_132966 | 4461   | No terminal repeats | 11      | 11           | 0.9346        | NA  | 0           | 0.8148            |
| S1-wms-combined_169788 | 4712   | No terminal repeats | 8       | 11           | 0.8482        | NA  | 0           | 0.876             |

Note:

Provirus detected

| conjugation_genes | amr_genes |
|-------------------|-----------|
| NA                | NA        |
| NA                | NA        |
| NA                | NA        |
| MOBV              | NF000153  |
| MOBV              | NA        |
| NA                | NA        |

| conjugation_genes | amr_genes |
|-------------------|-----------|
| B_traF            | NA        |
| NA                | NA        |
