# Supplementary material for: Investigating the Human Intestinal DNA Virome and Predicting Disease-Associated Virus–Host Interactions in Severe Myalgic Encephalomyelitis/Chronic Fatigue Syndrome (ME/CFS)
Source: MDPI journal article supplement (doi:10.3390/ijms242417267), 2023-12-08
Supplement: s1 [file s1]

**Table S1-1. Cohort and stats of sequences**

**Cohort features**

| Sample IDs | Health status | Gender | Age range at time of collection | # Household-matched pair | Collection of clinical metadata | Sample type   | Sample source | Bristol stool scale | Sample dry weight (g) | VLP/mL                | VLP/g feces           | Total DNA (ng) | DNA yield (ng/g feces) | VLP-enriched DNA virome | Bulk whole metagenome (WMS) |
|------------|---------------|--------|---------------------------------|--------------------------|---------------------------------|---------------|---------------|---------------------|-----------------------|-----------------------|-----------------------|----------------|------------------------|-------------------------|-----------------------------|
| S1         | Severe ME/CFS | F      | 56-60                           | 1M                       | Y                               | Frozen faeces | Homo sapiens  | 2                   | 22.25                 | 1.1 x 10 <sup>8</sup> | 7.1 x 10 <sup>8</sup> | 2000.0         | 89.9                   | Y                       | Y                           |
| S2         | SHHC          | M      | 61-65                           | 1C                       | NA                              | Frozen faeces | Homo sapiens  | 7                   | 21.92                 | 1.4 x 10 <sup>8</sup> | 8.8 x 10 <sup>8</sup> | 6120.0         | 279.2                  | Y                       | Y                           |
| S3         | Severe ME/CFS | F      | 36-40                           | 2M                       | Y                               | Frozen faeces | Homo sapiens  | 6                   | 44.83                 | 2.7 x 10 <sup>8</sup> | 1.7 x 10 <sup>9</sup> | 2745.0         | 61.2                   | Y                       | Y                           |
| S4         | SHHC          | M      | 36-40                           | 2C                       | NA                              | Frozen faeces | Homo sapiens  | 5                   | 37.29                 | 2.1 x 10 <sup>8</sup> | 1.3 x 10 <sup>9</sup> | 3852.0         | 103.3                  | Y                       | Y                           |
| S5         | Severe ME/CFS | F      | 21-25                           | 3M                       | Y                               | Frozen faeces | Homo sapiens  | 1                   | 20.77                 | 1.2 x 10 <sup>8</sup> | 7.7 x 10 <sup>8</sup> | 383.5          | 18.5                   | Y                       | Y                           |
| S6         | SHHC          | F      | 56-60                           | 3C                       | NA                              | Frozen faeces | Homo sapiens  | 6                   | 19.42                 | 6.2 x 10 <sup>7</sup> | 3.9 x 10 <sup>8</sup> | 3657.0         | 188.3                  | Y                       | Y                           |
| S7         | Severe ME/CFS | F      | 21-25                           | 4M                       | Y                               | Frozen faeces | Homo sapiens  | 5                   | 20.00                 | 4.0 x 10 <sup>8</sup> | 2.5 x 10 <sup>9</sup> | 615.0          | 30.8                   | Y                       | Y                           |
| S8         | SHHC          | M      | 21-25                           | 4C                       | NA                              | Frozen faeces | Homo sapiens  | 2                   | 20.29                 | 3.2 x 10 <sup>8</sup> | 2.0 x 10 <sup>9</sup> | 3733.2         | 184.0                  | Y                       | Y                           |
| S9         | Severe ME/CFS | F      | 36-40                           | 5M                       |                                 | Frozen faeces | Homo sapiens  |                     | 50.00                 | 2.1 x 10 <sup>8</sup> | 1.3 x 10 <sup>9</sup> | 600.0          | 12.0                   | Y                       | Y                           |
| S10        | SHHC          | F      | 61-65                           | 5C                       |                                 | Frozen faeces | Homo sapiens  |                     | 50.00                 | 2.2 x 10 <sup>8</sup> | 1.4 x 10 <sup>9</sup> | 1842.0         | 36.8                   | Y                       | N                           |
| S11        | Severe ME/CFS | F      | 21-25                           | 6M                       |                                 | Frozen faeces | Homo sapiens  |                     | 41.21                 | 4.6 x 10 <sup>8</sup> | 2.9 x 10 <sup>9</sup> | 1027.0         | 24.9                   | Y                       | Y                           |
| S12        | SHHC          | F      | 56-60                           | 6C                       |                                 | Frozen faeces | Homo sapiens  |                     | 38.17                 | 3.3 x 10 <sup>8</sup> | 2.1 x 10 <sup>9</sup> | 945.0          | 24.8                   | Y                       | Y                           |
| S13        | Severe ME/CFS | F      | 36-40                           | 9M (Unmatched)           | Unrecorded                      | Frozen faeces | Homo sapiens  | Unrecorded          | 33.62                 | 7.2 x 10 <sup>7</sup> | 4.5 x 10 <sup>8</sup> | 4670.0         | 138.9                  | Y                       | N                           |
| S14        | Severe ME/CFS | F      | 16-20                           | 7M                       |                                 | Frozen faeces | Homo sapiens  |                     | 16.37                 | 2.1 x 10 <sup>8</sup> | 1.3 x 10 <sup>9</sup> | 488.0          | 29.8                   | Y                       | N                           |
| S15        | SHHC          | F      | 51-55                           | 7C                       |                                 | Frozen faeces | Homo sapiens  |                     | 17.42                 | 4.1 x 10 <sup>8</sup> | 2.6 x 10 <sup>9</sup> | 5592.0         | 321.0                  | Y                       | N                           |
| S16        | SHHC          | F      | 66-70                           | 8C                       |                                 | Frozen faeces | Homo sapiens  |                     | 31.65                 | 1.9 x 10 <sup>8</sup> | 1.2 x 10 <sup>9</sup> | 2806.0         | 88.7                   | Y                       | N                           |
| S17        | Severe ME/CFS | F      | 41-45                           | 8M                       |                                 | Frozen faeces | Homo sapiens  |                     | 40.16                 | 4.6 x 10 <sup>8</sup> | 2.8 x 10 <sup>9</sup> | 1738.0         | 43.3                   | Y                       | Y                           |
| NC1        | Blank         | NA     | NA                              | NA                       | NA                              | Buffer only   | NA            | NA                  | NA                    | 0                     | 0                     | ND             | ND                     | Y                       | NA                          |
| NC2        | Blank         | NA     | NA                              | NA                       | NA                              | Buffer only   | NA            | NA                  | NA                    | 0                     | 0                     | ND             | ND                     | Y                       | NA                          |
| NC3        | Blank         | NA     | NA                              | NA                       | NA                              | Buffer only   | NA            | NA                  | NA                    | 0                     | 0                     | ND             | ND                     | Y                       | NA                          |

ME/CFS: Myalgic Encephalomyelitis and chronic fatigue syndrome

SHHC: same household healthy control

NC: negative/processing control sample (buffer only)

M: ME/CFS sample

C: SHHC sample

NA: not applicable

ND: not detectable

Y: samples used for either VLP-enriched or WMS analysis or used for both

N: samples not used for WMS analysis

**Table S1-2. enriched-vlp-reads and contigs**

| Sample_IDs | # Raw reads (PE) | # Cleaned reads (PE) | # Total raw contigs | N50 (bp) | Longest contig length (bp) |
|------------|------------------|----------------------|---------------------|----------|----------------------------|
| S1         | 72345890         | 35113882             | 160117              | 1328     | 101988                     |
| S2         | 66466528         | 56868494             | 21603               | 1903     | 269575                     |
| S3         | 210025926        | 174177994            | 126065              | 7721     | 303660                     |
| S4         | 49280544         | 47904786             | 32063               | 7049     | 118697                     |
| S5         | 80290420         | 65733438             | 143928              | 10731    | 474479                     |
| S6         | 81370828         | 68149392             | 56204               | 15510    | 501646                     |
| S7         | 97834806         | 81075886             | 138310              | 3884     | 405769                     |
| S8         | 223264658        | 183020194            | 205876              | 2915     | 522585                     |
| S9         | 84139802         | 71023532             | 90503               | 2228     | 321418                     |
| S10        | 87299754         | 73760336             | 121264              | 4484     | 699342                     |
| S11        | 80553640         | 67000402             | 103564              | 3234     | 251440                     |
| S12        | 100680974        | 85558566             | 187492              | 3525     | 621377                     |
| S13        | 72438224         | 60096768             | 154404              | 1978     | 289301                     |
| S14        | 75299764         | 61978780             | 112646              | 4931     | 361320                     |
| S15        | 40202586         | 32235928             | 77515               | 4759     | 317833                     |
| S16        | 89664968         | 74204032             | 173237              | 4480     | 530177                     |
| S17        | 75436218         | 58989106             | 174502              | 3202     | 335129                     |
| Sum        | 1586595530       | 1296891516           | 2079293             | 83862    | 6425736                    |
| Mean       | 93329148.8       | 76287736.0           | 122311.4            | 4933.0   | 377984.0                   |
| SD         | 48857207.3       | 41056515.8           | 53541.4             | 3618.0   | 163066.2                   |

**enriched-vlp-viral genomes**

|                              | Merged_UViGs | UViGs_50-100%_completeness_checkv | nr_vOTUs | vOTUs_size_filtration_1kb_cut_off | HQ-vOTUs_50-100%_completeness_checkv |
|------------------------------|--------------|-----------------------------------|----------|-----------------------------------|--------------------------------------|
| # Viral genomes              | 311208       | 2267                              | 192146   | 54779                             | 1231                                 |
| # Viral genomes ≥ 1 kb       | 88434        | 2267                              | 54779    | 54779                             | 1231                                 |
| # Viral genomes ≥ 5 kb       | 13160        | 2240                              | 8038     | 8038                              | 1210                                 |
| # Viral genomes ≥ 10 kb      | 5686         | 2180                              | 3278     | 2378                              | 1172                                 |
| N50 (bp)                     | 4064         | NA                                | 3694     | 6580                              | 49258                                |
| Longest representative (bp)  | 289184       | 289184                            | 289184   | 289184                            | 289184                               |
| Shortest representative (bp) | 167          | 2070                              | 180      | 1000                              | 2070                                 |

nr: non-redundancy  
 UViG: uncultivated virus genome  
 vOTU: virus operational taxonomic unit  
 HQ: high quality  
 #: quantity or number  
 NA: not applicable

Table S1-3. wms-reads and contigs

| Sample_IDs | # Raw reads (PE) | # Cleaned reads (PE) | # Total raw contigs | N50 (bp) | Longest contig length (bp) |
|------------|------------------|----------------------|---------------------|----------|----------------------------|
| S1         | 144016818        | 144000416            | 368621              | 3209     | 593488                     |
| S2         | 148221396        | 148218256            | 238143              | 7203     | 593489                     |
| S3         | 12026774         | 12026424             | 135476              | 1492     | 99031                      |
| S4         | 53446050         | 53444298             | 164089              | 2217     | 415342                     |
| S5         | 186302984        | 186273684            | 210113              | 9964     | 587364                     |
| S6         | 57739770         | 57739286             | 139652              | 3307     | 563736                     |
| S7         | 137959804        | 137959384            | 240000              | 4991     | 606105                     |
| S8         | 90881904         | 90880674             | 266924              | 2693     | 525861                     |
| S9         | 87344710         | 87343694             | 126134              | 8430     | 680403                     |
| S11        | 84507078         | 84502272             | 321191              | 2940     | 302351                     |
| S12        | 140009544        | 140008922            | 386774              | 3041     | 431188                     |
| S17        | 110272558        | 110271798            | 257744              | 2366     | 502130                     |
| Sum        | 1252729390       | 1252669108           | 2854861             | 52853    | 5900488                    |
| Mean       | 104394115.8      | 104389092.3          | 237905.1            | 4404.4   | 491707.3                   |
| SD         | 49361687.0       | 49356246.2           | 88566.7             | 2683.3   | 160841.5                   |

wms-viral genomes

|                              | Merged_UVIGs | UVIGs_50-100%_completeness_checkv | nr_vOTUs | Size_filtration_1kb_cut_off | HQ-vOTUs_50-100%_completeness_checkv |
|------------------------------|--------------|-----------------------------------|----------|-----------------------------|--------------------------------------|
| # Viral genomes              | 261744       | 961                               | 184317   | 59753                       | 688                                  |
| # Viral genomes ≥ 1 kb       | 82029        | 961                               | 59753    | 59753                       | 688                                  |
| # Viral genomes ≥ 5 kb       | 11871        | 923                               | 8708     | 8708                        | 659                                  |
| # Viral genomes ≥ 10 kb      | 4417         | 891                               | 3227     | 3227                        | 636                                  |
| N50 (bp)                     | 3491         | NA                                | 3616     | 5509                        | 62201                                |
| Longest representative (bp)  | 413955       | 413955                            | 413955   | 413955                      | 413955                               |
| Shortest representative (bp) | 193          | 1992                              | 196      | 1000                        | 2384                                 |

nr: non-redundancy  
UVIG: uncultivated virus genome  
vOTU: virus operational taxonomic unit  
HQ: high quality  
#: quantity or number  
NA: not applicable

WMS-coassembly for bacteriome analysis

|          | # Contigs | Total length (bp) | Mean of length (bp) | N50 (bp) | Longest length (bp) | Shortest length (bp) |
|----------|-----------|-------------------|---------------------|----------|---------------------|----------------------|
| Quantity | 774,887   | 591,013,764       | 762.71              | 890      | 135,997             | 212                  |

Table S1-4. BLAST\_WMS\_against\_VLP

| qseqid                  | sseqid                     | pident | qcovs | length | mismatch | gapopen | qstart | send   | sstart | send   | evalue    | bitscore | Sorting:                                                                                     |
|-------------------------|----------------------------|--------|-------|--------|----------|---------|--------|--------|--------|--------|-----------|----------|----------------------------------------------------------------------------------------------|
| S2-wms-combined_95987   | S14_vs_9162                | 100    | 0     | 29     | 0        | 0       | 10311  | 10339  | 47371  | 47399  | 2.05E-05  | 54.7     | 1. evaluate: < 1E-05                                                                         |
| S2-wms_248327           | S8_vs_50431                | 100    | 0     | 29     | 0        | 0       | 5176   | 5204   | 23296  | 23324  | 1.87E-05  | 54.7     | 2. bitscore: set score > 1000                                                                |
| S2-wms-combined_185494  | S15_vf_33505               | 100    | 0     | 33     | 0        | 0       | 28928  | 28960  | 5866   | 5834   | 2.68E-06  | 62.1     | 3. pident: percentage of identical matches: > 95% (similarity)                               |
| S1-wms-combined_353757  | S14_vs_66139               | 97.297 | 0     | 37     | 1        | 0       | 18939  | 18975  | 156473 | 156437 | 1.14E-07  | 63.9     | 4. qcovs: query coverage per subject: > 85% (coverage)                                       |
| S9-wms-combined_93232   | S5_vf_74661                | 90     | 0     | 50     | 5        | 0       | 13333  | 13382  | 20063  | 20014  | 4.47E-08  | 65.8     | 5. Result: 193/600 hits of WMS-HQ-vOTUs (688) are highly identical against 1231 VLP-HQ-vOTUs |
| S2-wms-combined_190624  | S16_vs_17493               | 81.818 | 0     | 77     | 14       | 0       | 14724  | 14800  | 12955  | 12879  | 2.35E-08  | 65.8     |                                                                                              |
| S6-wms-combined_41246   | S5_vs_65490                | 81.176 | 0     | 85     | 14       | 2       | 34140  | 34223  | 27618  | 27701  | 9.95E-09  | 67.6     |                                                                                              |
| S2-wms-combined_135139  | S16_vs_173096              | 95.349 | 0     | 43     | 2        | 0       | 4942   | 4984   | 15558  | 15516  | 7.94E-09  | 69.4     |                                                                                              |
| S1-wms_244836           | S10_vs_36598               | 74.375 | 1     | 60     | 41       | 0       | 3739   | 3898   | 23033  | 22874  | 2.14E-09  | 69.4     |                                                                                              |
| S4-wms-combined_118531  | S9_vs_90850                | 77.778 | 0     | 135    | 28       | 2       | 31257  | 31390  | 2797   | 2664   | 6.07E-13  | 82.4     |                                                                                              |
| S2-wms-combined_99446   | S11_vs_8456                | 94.444 | 0     | 54     | 1        | 1       | 19347  | 19398  | 22391  | 22338  | 3.77E-13  | 82.4     |                                                                                              |
| S2-wms-combined_7756    | S5_vs_86562                | 73.953 | 0     | 215    | 52       | 4       | 1587   | 1799   | 24722  | 24934  | 1.54E-13  | 84.2     |                                                                                              |
| S2-wms-combined_48661   | S9_vf_19284                | 100    | 1     | 43     | 0        | 0       | 944    | 986    | 28724  | 28766  | 1.20E-13  | 80.5     |                                                                                              |
| S17-wms-combined_162786 | S16_vf_173099              | 85.542 | 0     | 83     | 11       | 1       | 62725  | 62806  | 23501  | 23583  | 1.03E-13  | 86.1     |                                                                                              |
| S4-wms-combined_113721  | S7_vs_111831               | 93.103 | 0     | 58     | 3        | 1       | 18807  | 18863  | 3057   | 3000   | 7.22E-14  | 84.2     |                                                                                              |
| S2-wms_192667           | S5_vs_8125                 | 83.168 | 0     | 101    | 11       | 5       | 4216   | 4313   | 22124  | 22027  | 5.05E-15  | 87.9     |                                                                                              |
| S8-wms-combined_185611  | S1_vs_21439                | 76.536 | 0     | 179    | 34       | 8       | 32101  | 32275  | 21956  | 22130  | 5.24E-16  | 91.6     |                                                                                              |
| S2-wms-combined_52568   | S1_vs_155183               | 93.75  | 0     | 64     | 4        | 0       | 40704  | 40767  | 1581   | 1518   | 1.54E-17  | 97.1     |                                                                                              |
| S9-wms-combined_71647   | S14_vs_96286               | 95.161 | 0     | 62     | 3        | 0       | 13236  | 13297  | 7771   | 7710   | 1.94E-18  | 99       |                                                                                              |
| S7-wms-combined_143218  | S12_vf_18902               | 89.474 | 1     | 76     | 8        | 0       | 483    | 558    | 7058   | 7133   | 1.80E-18  | 97.1     |                                                                                              |
| S11-wms_32691           | S5_vf_103206               | 90.909 | 0     | 77     | 7        | 0       | 114865 | 114941 | 18187  | 18263  | 2.91E-19  | 104      |                                                                                              |
| S1-wms-combined_197401  | S16_vs_26078               | 83.761 | 0     | 117    | 15       | 3       | 51590  | 51706  | 19779  | 19667  | 7.72E-21  | 108      |                                                                                              |
| S2-wms_140933           | S4_vf_13353                | 85.577 | 0     | 104    | 14       | 1       | 23828  | 23930  | 44241  | 44138  | 6.61E-21  | 108      |                                                                                              |
| S17-wms-combined_179363 | S12_vs_75098               | 71.007 | 3     | 576    | 137      | 26      | 2605   | 3168   | 12004  | 11447  | 2.05E-22  | 111      |                                                                                              |
| S1-wms-combined_40115   | S5_vs_77593                | 92.308 | 3     | 78     | 6        | 0       | 62     | 139    | 98222  | 98145  | 2.63E-23  | 111      |                                                                                              |
| S9-wms-combined_89249   | S9_vs_90859                | 91.011 | 0     | 89     | 4        | 3       | 20484  | 20569  | 24510  | 24597  | 6.02E-24  | 117      |                                                                                              |
| S8-wms-combined_40666   | S8_vs_46394                | 89.216 | 0     | 102    | 5        | 5       | 44263  | 44360  | 8663   | 8762   | 3.69E-25  | 122      |                                                                                              |
| S17-wms_106671          | S7_vs_40259                | 72.235 | 2     | 425    | 108      | 9       | 6592   | 7011   | 2702   | 3121   | 1.22E-25  | 122      |                                                                                              |
| S2-wms-combined_248318  | S5_vf_105728               | 76.754 | 1     | 228    | 49       | 4       | 822    | 1047   | 33418  | 33643  | 3.57E-26  | 124      |                                                                                              |
| S2-wms-combined_180640  | S3_vs_16825                | 91.753 | 1     | 97     | 6        | 2       | 3254   | 3349   | 47899  | 47994  | 7.24E-29  | 134      |                                                                                              |
| S2-wms-combined_89742   | S11_vs_36748               | 86.154 | 1     | 130    | 10       | 5       | 21057  | 21184  | 4352   | 4229   | 5.81E-29  | 134      |                                                                                              |
| S1-wms-combined_143459  | S17_vs_177203              | 91.919 | 1     | 99     | 5        | 1       | 706    | 804    | 19956  | 19861  | 2.38E-29  | 135      |                                                                                              |
| S4-wms_107182           | S5_vf_29332                | 80.628 | 1     | 191    | 33       | 4       | 3577   | 3765   | 22074  | 22262  | 1.90E-32  | 145      |                                                                                              |
| S5-wms-combined_94482   | S16_vs_32764               | 86.62  | 0     | 142    | 12       | 6       | 54562  | 54700  | 42685  | 42822  | 1.42E-33  | 150      |                                                                                              |
| S17-wms-combined_146050 | S16_vs_32764               | 79.654 | 1     | 231    | 34       | 11      | 4341   | 4563   | 42908  | 42683  | 7.44E-35  | 154      |                                                                                              |
| S12-wms-combined_147628 | S16_vs_26078               | 91.379 | 0     | 116    | 6        | 3       | 10620  | 10735  | 19779  | 19668  | 4.04E-35  | 156      |                                                                                              |
| S9-wms_64472            | S17_vs_133231              | 85.276 | 3     | 163    | 13       | 11      | 144    | 300    | 8959   | 8802   | 7.67E-37  | 158      |                                                                                              |
| S5-wms-combined_94786   | S3_vs_50557                | 74.783 | 1     | 460    | 98       | 15      | 29109  | 29559  | 4001   | 4451   | 1.01E-45  | 191      |                                                                                              |
| S17-wms-combined_95360  | S7_vs_134784               | 76.574 | 0     | 397    | 66       | 16      | 42179  | 42551  | 3186   | 2793   | 4.97E-46  | 193      |                                                                                              |
| S8-wms_82880            | S17_vs_110666              | 76.923 | 1     | 351    | 77       | 4       | 23882  | 24230  | 37120  | 36772  | 1.43E-47  | 196      |                                                                                              |
| S1-wms-combined_159544  | S17_vs_177203              | 98.23  | 1     | 113    | 2        | 0       | 254    | 366    | 20342  | 20230  | 1.76E-48  | 198      |                                                                                              |
| S2-wms-combined_135154  | S7_vs_134784               | 90     | 0     | 160    | 10       | 5       | 33499  | 33655  | 594    | 750    | 4.28E-49  | 202      |                                                                                              |
| S5-wms-combined_205046  | S14_vs_3162                | 76.993 | 1     | 382    | 78       | 11      | 14516  | 14889  | 43334  | 43707  | 6.10E-50  | 204      |                                                                                              |
| S1-wms-combined_32863   | S15_vs_42043               | 93.706 | 1     | 143    | 7        | 1       | 8139   | 8281   | 193486 | 193346 | 4.73E-53  | 213      |                                                                                              |
| S4-wms-combined_24659   | S2_vf_67333                | 75.67  | 7     | 448    | 101      | 6       | 3021   | 3464   | 10612  | 11055  | 2.13E-54  | 217      |                                                                                              |
| S2-wms_246296           | S3_vf_108959               | 88.205 | 0     | 195    | 23       | 0       | 31598  | 31792  | 53743  | 53937  | 1.24E-58  | 233      |                                                                                              |
| S2-wms-combined_238929  | S8_vf_208126               | 72.355 | 2     | 879    | 213      | 29      | 18441  | 19304  | 43437  | 42574  | 9.55E-64  | 250      |                                                                                              |
| S12-wms-combined_299872 | S14_vf_58919               | 71.527 | 4     | 1166   | 277      | 49      | 12153  | 13292  | 13146  | 14282  | 9.01E-68  | 263      |                                                                                              |
| S8-wms-combined_211119  | S8_vf_93976                | 81.176 | 1     | 340    | 52       | 11      | 6911   | 7241   | 24527  | 24863  | 7.46E-68  | 263      |                                                                                              |
| S4-wms-combined_64632   | S8_vs_59736                | 78.883 | 1     | 412    | 79       | 6       | 31134  | 31540  | 23239  | 22831  | 2.76E-70  | 272      |                                                                                              |
| S12-wms-combined_263377 | S16_vs_172749              | 76.392 | 1     | 521    | 117      | 5       | 51866  | 52383  | 1363   | 846    | 2.21E-71  | 276      |                                                                                              |
| S12-wms_373775          | S5_vs_145593               | 78.641 | 3     | 412    | 88       | 0       | 9724   | 10135  | 14381  | 13970  | 1.91E-71  | 274      |                                                                                              |
| S17-wms-combined_106262 | S14_vs_117161              | 80.585 | 1     | 376    | 63       | 9       | 6766   | 7136   | 8510   | 8140   | 4.61E-73  | 281      |                                                                                              |
| S7-wms-combined_136642  | S4_vf_12624                | 75.916 | 5     | 573    | 124      | 13      | 6145   | 6710   | 2408   | 2973   | 1.99E-73  | 281      |                                                                                              |
| S5-wms-combined_183113  | S14_vs_74067               | 72.756 | 3     | 947    | 236      | 18      | 27317  | 28252  | 74941  | 75876  | 6.49E-79  | 300      |                                                                                              |
| S11-wms_320555          | S12_vf_69136               | 72.246 | 7     | 1189   | 259      | 43      | 29883  | 31036  | 27457  | 28609  | 1.92E-79  | 302      |                                                                                              |
| S11-wms-combined_46816  | S3_vs_15450                | 79.47  | 2     | 453    | 85       | 7       | 15653  | 16101  | 26767  | 26319  | 2.35E-83  | 315      |                                                                                              |
| S2-wms-combined_58121   | S3_vs_64424                | 89.328 | 1     | 253    | 27       | 0       | 20668  | 20920  | 34002  | 33750  | 1.67E-84  | 318      |                                                                                              |
| S12-wms-combined_334806 | S6_vs_1146                 | 73.326 | 1     | 911    | 227      | 13      | 42974  | 43876  | 51895  | 52797  | 3.92E-85  | 322      |                                                                                              |
| S2-wms-combined_176376  | S16_vs_173079              | 80.134 | 1     | 448    | 78       | 11      | 19202  | 19643  | 14178  | 14620  | 5.52E-86  | 324      |                                                                                              |
| S2-wms-combined_143737  | S10_vs_62776               | 83.196 | 1     | 363    | 61       | 0       | 30942  | 31304  | 14020  | 13658  | 1.15E-88  | 333      |                                                                                              |
| S7-wms-combined_157434  | S16_vs_140709              | 78.794 | 1     | 514    | 100      | 9       | 29926  | 30435  | 19561  | 20069  | 6.02E-90  | 337      |                                                                                              |
| S12-wms-combined_270839 | S9_vs_84046                | 73.313 | 2     | 1008   | 235      | 29      | 4381   | 5371   | 28239  | 27249  | 7.16E-91  | 340      |                                                                                              |
| S12-wms-combined_148741 | S9_vs_84046                | 73.42  | 2     | 997    | 231      | 28      | 39287  | 40266  | 27257  | 28236  | 1.50E-91  | 342      |                                                                                              |
| S4-wms-combined_51079   | S4_vf_12624                | 78.276 | 3     | 580    | 108      | 14      | 11993  | 12563  | 2973   | 2403   | 3.20E-96  | 357      |                                                                                              |
| S2-wms-combined_5791    | S7_vs_16344                | 72.511 | 1     | 1175   | 301      | 19      | 5921   | 7084   | 75136  | 73973  | 1.44E-96  | 361      |                                                                                              |
| S1-wms-combined_331544  | S4_vf_12624                | 78.448 | 2     | 580    | 107      | 14      | 14954  | 15524  | 2973   | 2403   | 7.32E-98  | 363      |                                                                                              |
| S2-wms-combined_93845   | S5_vs_138980               | 77.424 | 1     | 629    | 132      | 9       | 29374  | 29997  | 35421  | 34798  | 1.22E-98  | 366      |                                                                                              |
| S12-wms-combined_376326 | S12_vs_106329              | 74.734 | 2     | 847    | 201      | 13      | 44098  | 44938  | 4417   | 5256   | 1.00E-98  | 366      |                                                                                              |
| S4-wms-combined_83492   | S3_vs_80151                | 78.415 | 2     | 593    | 114      | 14      | 33415  | 34000  | 144122 | 144707 | 4.92E-101 | 374      |                                                                                              |
| S12-wms-combined_264845 | S5_vs_124677               | 77.607 | 6     | 652    | 136      | 9       | 2626   | 3272   | 57017  | 56371  | 3.27E-105 | 387      |                                                                                              |
| S7-wms-combined_14529   | S16_vs_15093               | 78.737 | 1     | 649    | 120      | 12      | 36814  | 37449  | 726    | 83     | 3.69E-114 | 418      |                                                                                              |
| S12-wms-combined_264077 | S5_vs_124677               | 79.868 | 2     | 606    | 99       | 21      | 19690  | 20285  | 8948   | 9540   | 1.46E-115 | 422      |                                                                                              |
| S7-wms_80255            | S3_vf_111893               | 73.715 | 6     | 1187   | 271      | 35      | 10141  | 11306  | 22000  | 23166  | 7.37E-117 | 425      |                                                                                              |
| S17-wms-combined_225356 | S3_vf_99626                | 75.276 | 4     | 1088   | 228      | 36      | 327    | 1394   | 25763  | 24697  | 1.98E-133 | 481      |                                                                                              |
| S12-wms-combined_52101  | S5_vs_112452               | 74.513 | 9     | 1181   | 277      | 20      | 13598  | 14766  | 2052   | 884    | 8.28E-137 | 492      |                                                                                              |
| S5-wms-combined_178432  | S11_vs_98193               | 78.396 | 2     | 773    | 161      | 4       | 2925   | 3694   | 279    | 1048   | 3.70E-138 | 497      |                                                                                              |
| S17-wms-combined_126774 | S1_vf_138157               | 85.66  | 1     | 466    | 64       | 0       | 64011  | 64476  | 20571  | 21036  | 8.12E-141 | 507      |                                                                                              |
| S8-wms-combined_117281  | S16_vs_18293               | 75.729 | 4     | 1063   | 236      | 21      | 5979   | 7030   | 27940  | 28991  | 2.00E-143 | 514      |                                                                                              |
| S12-wms-combined_246480 | S3_vs_127401               | 82.295 | 2     | 610    | 97       | 8       | 24054  | 24655  | 24927  | 24321  | 1.71E-144 | 518      |                                                                                              |
| S12-wms-combined_223043 | S14_vf_58919               | 72.439 | 10    | 1923   | 452      | 64      | 3522   | 5406   | 32739  | 30857  | 1.87E-152 | 544      |                                                                                              |
| S11-wms-combined_58538  | S11_vs_26767               | 83.533 | 3     | 583    | 96       | 0       | 33450  | 34032  | 3832   | 3250   | 9.21E-153 | 545      |                                                                                              |
| S11-wms_55610           | S4_vs_VIRSorter_4959-cat_2 | 80.16  | 1     | 751    | 140      | 6       | 44063  | 44807  | 2577   | 1830   | 9.02E-155 | 553      |                                                                                              |
| S12-wms-combined_168259 | S12_vs_86928               | 84.22  | 6     | 583    | 76       | 12      | 14402  | 14976  | 1198   | 1772   | 6.18E-155 | 553      |                                                                                              |

|                         |               |        |     |       |      |     |        |        |        |        |           |          |
|-------------------------|---------------|--------|-----|-------|------|-----|--------|--------|--------|--------|-----------|----------|
| S2-wms-combined_101826  | S3_vf_8164    | 84.764 | 1   | 571   | 85   | 2   | 22938  | 23507  | 12660  | 13229  | 2.65E-160 | 571      |
| S1-wms-combined_120533  | S5_vs_124035  | 80.816 | 8   | 735   | 133  | 7   | 6115   | 6845   | 7955   | 8685   | 1.33E-160 | 569      |
| S4-wms-combined_57123   | S6_vs_46039   | 74.981 | 7   | 1335  | 293  | 35  | 16159  | 17471  | 75449  | 76764  | 4.39E-162 | 577      |
| S12-wms_223235          | S16_vs_48714  | 90.805 | 11  | 435   | 40   | 0   | 2326   | 2760   | 16647  | 17081  | 7.74E-165 | 582      |
| S12-wms-combined_48648  | S8_vs_149700  | 95.418 | 3   | 371   | 16   | 1   | 10825  | 11195  | 67882  | 68251  | 1.31E-166 | 590      |
| S6-wms-combined_65225   | S7_vs_134784  | 83.645 | 3   | 642   | 101  | 3   | 7032   | 7672   | 24267  | 23629  | 1.26E-169 | 601      |
| S2-wms-combined_25727   | S4_vf_31979   | 87.199 | 2   | 539   | 58   | 7   | 33482  | 34013  | 19953  | 20487  | 8.75E-170 | 603      |
| S8-wms_113693           | S4_vf_31979   | 87.546 | 3   | 538   | 56   | 7   | 16119  | 16649  | 19953  | 20486  | 4.93E-173 | 612      |
| S5-wms_67169            | S8_vf_195032  | 70.787 | 9   | 3584  | 843  | 175 | 33149  | 36636  | 2326   | 5801   | 2.75E-178 | 630      |
| S1-wms-combined_340558  | S8_vs_9114    | 91.485 | 2   | 451   | 39   | 0   | 26876  | 27333  | 4427   | 3970   | 1.92E-178 | 630      |
| S9-wms-combined_53991   | S9_vs_67792   | 99.992 | 100 | 61938 | 4    | 1   | 1      | 61938  | 61937  | 1      | 0         | 1.14E+05 |
| S9-wms-combined_97755   | S9_vs_7881    | 99.95  | 57  | 26114 | 13   | 0   | 1      | 26114  | 2152   | 28265  | 0         | 48152    |
| S9-wms-combined_33230   | S5_vf_8965    | 95.799 | 35  | 6284  | 259  | 4   | 7261   | 13541  | 8044   | 1763   | 0         | 10137    |
| S9-wms-combined_2042    | S9_vs_88286   | 100    | 81  | 31342 | 0    | 0   | 1      | 31342  | 44732  | 13391  | 0         | 57878    |
| S9-wms-combined_124857  | S9_vs_50439   | 100    | 28  | 30128 | 0    | 0   | 50939  | 81066  | 1      | 30128  | 0         | 55636    |
| S9-wms-combined_28805   | S7_vs_119679  | 92.087 | 47  | 13535 | 987  | 54  | 30565  | 44043  | 44863  | 31357  | 0         | 18984    |
| S9-wms-combined_109322  | S7_vs_48832   | 83.583 | 2   | 2199  | 340  | 19  | 19556  | 21744  | 35780  | 33593  | 0         | 2041     |
| S9-wms-combined_3461    | S9_vs_90849   | 99.995 | 95  | 36619 | 2    | 0   | 1      | 36619  | 36619  | 1      | 0         | 67612    |
| S9-wms-combined_29611   | S17_vs_127519 | 89.171 | 0   | 868   | 89   | 4   | 345751 | 346617 | 18567  | 17704  | 0         | 1077     |
| S9-wms-combined_25007   | S13_vs_23314  | 74.995 | 20  | 4587  | 990  | 107 | 11442  | 15966  | 22553  | 18062  | 0         | 1971     |
| S9-wms-combined_3878    | S9_vs_90863   | 100    | 91  | 4891  | 0    | 0   | 665    | 5555   | 1      | 4891   | 0         | 9033     |
| S9-wms-combined_105462  | S5_vf_116300  | 84.985 | 2   | 686   | 82   | 16  | 30046  | 30714  | 17730  | 17049  | 0         | 676      |
| S9-wms-combined_20485   | S9_vf_90856   | 100    | 42  | 24912 | 0    | 0   | 49881  | 74792  | 24912  | 1      | 0         | 46004    |
| S9-wms-combined_9931    | S9_vs_90727   | 100    | 100 | 90630 | 0    | 0   | 1      | 90630  | 66187  | 156816 | 0         | 1.67E+05 |
| S9-wms-combined_36459   | S9_vs_48347   | 100    | 99  | 27978 | 0    | 0   | 1      | 27978  | 27978  | 1      | 0         | 51666    |
| S9-wms-combined_105822  | S9_vs_41371   | 79.467 | 35  | 4466  | 862  | 46  | 21501  | 25934  | 4677   | 235    | 0         | 3116     |
| S9-wms-combined_26410   | S11_vs_68151  | 96.563 | 96  | 26502 | 868  | 22  | 427    | 26896  | 34866  | 8376   | 0         | 43853    |
| S9-wms-combined_31456   | S9_vs_21850   | 99.995 | 76  | 36645 | 1    | 1   | 9789   | 46433  | 1      | 36644  | 0         | 67658    |
| S9-wms-combined_37587   | S7_vs_557     | 81.25  | 1   | 1040  | 181  | 11  | 4689   | 5721   | 22885  | 21853  | 0         | 828      |
| S9-wms-combined_5526    | S9_vs_48424   | 100    | 74  | 38027 | 0    | 0   | 1      | 38027  | 16762  | 54788  | 0         | 70223    |
| S9-wms-combined_33229   | S9_vs_28197   | 99.996 | 100 | 23889 | 1    | 0   | 1      | 23889  | 23889  | 1      | 0         | 44110    |
| S9-wms-combined_76274   | S5_vs_63924   | 99.978 | 51  | 27377 | 4    | 2   | 10684  | 38060  | 35637  | 8263   | 0         | 50521    |
| S9-wms-combined_44402   | S5_vs_72532   | 79.495 | 29  | 4394  | 836  | 48  | 2491   | 6844   | 45184  | 40816  | 0         | 3062     |
| S9-wms_19025            | S10_vf_64371  | 99.935 | 100 | 24556 | 16   | 0   | 26716  | 51271  | 59185  | 34630  | 0         | 45258    |
| S9-wms_128232           | S9_vf_23901   | 99.934 | 100 | 4540  | 3    | 0   | 1444   | 5983   | 1      | 4540   | 0         | 8368     |
| S11-wms-combined_41367  | S11_vs_45658  | 99.997 | 99  | 39169 | 1    | 0   | 13     | 39181  | 8205   | 47373  | 0         | 72327    |
| S11-wms-combined_193148 | S6_vs_39065   | 98.05  | 95  | 7743  | 69   | 20  | 3727   | 11429  | 9993   | 17693  | 0         | 13387    |
| S11-wms-combined_179605 | S11_vs_26767  | 89.152 | 3   | 719   | 74   | 2   | 21129  | 21847  | 1      | 715    | 0         | 893      |
| S11-wms-combined_221310 | S7_vs_129858  | 97.802 | 59  | 10375 | 226  | 2   | 22134  | 32507  | 21195  | 10822  | 0         | 17895    |
| S11-wms-combined_14636  | S11_vs_20225  | 99.994 | 99  | 35471 | 2    | 0   | 468    | 35938  | 1      | 35471  | 0         | 65492    |
| S11-wms-combined_83571  | S5_vs_79992   | 99.958 | 76  | 30845 | 1    | 1   | 9777   | 40621  | 1      | 30833  | 0         | 56877    |
| S11-wms-combined_125176 | S7_vf_117697  | 99.374 | 37  | 24610 | 151  | 3   | 1      | 24608  | 883    | 25491  | 0         | 44590    |
| S11-wms-combined_304239 | S11_vs_40945  | 99.983 | 99  | 29259 | 5    | 0   | 15448  | 44706  | 44575  | 15317  | 0         | 54004    |
| S11-wms-combined_194205 | S8_vs_149700  | 99.983 | 39  | 5940  | 430  | 5   | 141    | 6076   | 56070  | 50134  | 0         | 8545     |
| S11-wms-combined_236214 | S7_vs_87279   | 98.021 | 23  | 5912  | 93   | 19  | 75906  | 81805  | 40875  | 46774  | 0         | 10248    |
| S11-wms-combined_264050 | S8_vf_151384  | 97.92  | 51  | 29368 | 591  | 12  | 46455  | 75808  | 1192   | 30553  | 0         | 50830    |
| S11-wms-combined_140009 | S3_vs_119771  | 78.529 | 12  | 4541  | 823  | 116 | 40919  | 45412  | 9454   | 13889  | 0         | 2844     |
| S11-wms-combined_168048 | S7_vs_21521   | 84.655 | 3   | 1349  | 174  | 20  | 3509   | 4854   | 3115   | 1797   | 0         | 1314     |
| S11-wms-combined_195425 | S11_vs_84848  | 99.976 | 100 | 29097 | 7    | 0   | 1      | 29097  | 2550   | 31646  | 0         | 53694    |
| S11-wms-combined_154845 | S11_vs_5077   | 99.996 | 100 | 25037 | 1    | 0   | 1      | 25037  | 27863  | 2827   | 0         | 46230    |
| S11-wms-combined_17029  | S11_vs_79831  | 99.97  | 100 | 30219 | 9    | 0   | 1      | 30219  | 30219  | 1      | 0         | 55755    |
| S11-wms-combined_3507   | S1_vf_138157  | 90.858 | 6   | 2855  | 243  | 3   | 42288  | 45142  | 14189  | 11353  | 0         | 3810     |
| S11-wms-combined_320710 | S11_vs_104069 | 99.981 | 100 | 26195 | 0    | 3   | 18122  | 44314  | 1      | 26192  | 0         | 48340    |
| S11-wms-combined_101337 | S11_vs_82331  | 99.999 | 100 | 78390 | 1    | 0   | 1      | 78390  | 14307  | 92696  | 0         | 1.45E+05 |
| S11-wms-combined_73204  | S14_vs_74067  | 99.303 | 95  | 64838 | 398  | 48  | 1      | 64812  | 125374 | 190183 | 0         | 1.17E+05 |
| S11-wms-combined_226165 | S11_vs_98193  | 100    | 99  | 33032 | 0    | 0   | 1      | 33032  | 245    | 33276  | 0         | 60999    |
| S11-wms-combined_321938 | S11_vs_3277   | 99.924 | 84  | 35683 | 27   | 0   | 4328   | 40010  | 36230  | 548    | 0         | 65745    |
| S11-wms-combined_198512 | S11_vf_66160  | 99.931 | 86  | 34798 | 24   | 0   | 5708   | 40505  | 34800  | 3      | 0         | 64127    |
| S11-wms-combined_282227 | S5_vs_8847    | 81.746 | 42  | 3380  | 567  | 37  | 5223   | 8590   | 23672  | 20331  | 0         | 2778     |
| S11-wms-combined_267993 | S1_vf_158961  | 76.142 | 4   | 3370  | 692  | 78  | 51281  | 54576  | 10311  | 6980   | 0         | 1666     |
| S11-wms-combined_74983  | S7_vs_134583  | 98.78  | 93  | 24091 | 289  | 3   | 18563  | 42649  | 1044   | 25133  | 0         | 42854    |
| S11-wms-combined_116589 | S7_vs_28150   | 80.844 | 11  | 2892  | 502  | 43  | 18891  | 21759  | 4754   | 1892   | 0         | 2224     |
| S11-wms-combined_48246  | S11_vs_1937   | 99.994 | 71  | 34922 | 2    | 0   | 8306   | 43227  | 1      | 34922  | 0         | 64478    |
| S11-wms-combined_283220 | S11_vs_52577  | 99.943 | 88  | 29970 | 17   | 0   | 4      | 29973  | 29970  | 1      | 0         | 55251    |
| S11-wms-combined_172889 | S7_vs_119679  | 88.612 | 13  | 3776  | 375  | 45  | 25479  | 29228  | 42686  | 46432  | 0         | 4540     |
| S11-wms-combined_117756 | S11_vs_104037 | 100    | 100 | 25717 | 0    | 0   | 1      | 25717  | 18094  | 43810  | 0         | 47491    |
| S11-wms-combined_49632  | S5_vs_69980   | 74.662 | 18  | 3919  | 844  | 124 | 5148   | 8994   | 3846   | 7687   | 0         | 1598     |
| S11-wms-combined_63818  | S11_vf_70015  | 99.964 | 53  | 53033 | 19   | 0   | 10357  | 63389  | 796    | 53828  | 0         | 97829    |
| S11-wms-combined_215723 | S10_vs_37694  | 98.172 | 35  | 16031 | 262  | 18  | 11601  | 27621  | 20356  | 4347   | 0         | 27952    |
| S11-wms-combined_64392  | S12_vs_23796  | 77.726 | 16  | 5841  | 1162 | 123 | 22260  | 28030  | 18578  | 24349  | 0         | 3450     |
| S11-wms-combined_92114  | S11_vs_36748  | 99.993 | 55  | 27110 | 1    | 1   | 1      | 27109  | 32562  | 5453   | 0         | 50050    |
| S11-wms-combined_119215 | S5_vs_69980   | 79.881 | 37  | 6377  | 1101 | 146 | 11419  | 17682  | 7938   | 1631   | 0         | 4501     |
| S11-wms-combined_299954 | S11_vs_104049 | 99.988 | 97  | 16934 | 2    | 0   | 9379   | 26312  | 1      | 16934  | 0         | 31261    |
| S11-wms-combined_217790 | S12_vs_26336  | 99.995 | 74  | 40062 | 2    | 0   | 1      | 40062  | 27031  | 67092  | 0         | 73970    |
| S11-wms-combined_204522 | S11_vs_6458   | 99.974 | 100 | 30685 | 8    | 0   | 1      | 30685  | 35244  | 4560   | 0         | 56621    |
| S11-wms_303398          | S5_vf_21869   | 89.593 | 17  | 1768  | 169  | 13  | 10493  | 12256  | 23361  | 21605  | 0         | 2231     |
| S11-wms_14390           | S11_vf_33117  | 99.997 | 100 | 38385 | 1    | 0   | 1      | 38385  | 14291  | 52675  | 0         | 70879    |
| S11-wms_3116            | S7_vf_39724   | 96.431 | 81  | 31210 | 1004 | 69  | 7366   | 38537  | 36206  | 5069   | 0         | 51361    |
| S11-wms_87293           | S11_vf_104048 | 100    | 100 | 26833 | 0    | 0   | 1      | 26833  | 26833  | 1      | 0         | 49552    |
| S11-wms_6203            | S11_vf_89309  | 99.998 | 100 | 45102 | 1    | 0   | 1      | 45102  | 1      | 45102  | 0         | 83283    |
| S11-wms_330479          | S11_vf_104071 | 99.924 | 100 | 31533 | 0    | 1   | 1      | 31509  | 31533  | 1      | 0         | 58076    |
| S1-wms-combined_324053  | S13_vs_98591  | 99.924 | 90  | 35476 | 6    | 1   | 37     | 35491  | 1341   | 36816  | 0         | 65342    |
| S1-wms-combined_394574  | S2_vs_7306    | 99.967 | 100 | 41917 | 11   | 1   | 4917   | 46833  | 1      | 41914  | 0         | 77325    |
| S1-wms-combined_394628  | S12_vs_137069 | 88.457 | 91  | 5371  | 542  | 69  | 3793   | 9122   | 5574   | 10907  | 0         | 6412     |
| S1-wms-combined_246923  | S5_vs_69083   | 78.779 | 12  | 2686  | 507  | 53  | 4      | 2652   | 1955   | 4614   | 0         | 1744     |
| S1-wms-combined_263562  | S3_vs_70508   | 98.849 | 97  | 14948 | 145  | 19  | 13188  | 28128  | 28635  | 13708  | 0         | 26626    |

|                        |                            |        |     |        |      |     |        |        |        |        |   |          |
|------------------------|----------------------------|--------|-----|--------|------|-----|--------|--------|--------|--------|---|----------|
| S1-wms-combined_164894 | S14_vs_9162                | 97.934 | 36  | 7502   | 134  | 16  | 6365   | 13857  | 85064  | 92553  | 0 | 12975    |
| S1-wms-combined_231234 | S13_vs_14794               | 99.807 | 84  | 19668  | 29   | 1   | 1      | 19668  | 19659  | 1      | 0 | 36101    |
| S1-wms-combined_132934 | S11_vs_19892               | 88.986 | 59  | 23615  | 2412 | 144 | 15106  | 38628  | 1      | 23518  | 0 | 29024    |
| S1-wms-combined_17651  | S12_vs_164056              | 76.08  | 24  | 1806   | 394  | 31  | 5712   | 7506   | 1849   | 71     | 0 | 907      |
| S1-wms-combined_330329 | S11_vs_3277                | 89.217 | 92  | 26172  | 2692 | 105 | 5646   | 31762  | 7537   | 33633  | 0 | 32577    |
| S1-wms-combined_116938 | S7_vs_111831               | 74.418 | 39  | 4636   | 1043 | 119 | 9880   | 14446  | 28761  | 33322  | 0 | 1858     |
| S1-wms-combined_166392 | S1_vs_133577               | 99.907 | 100 | 19346  | 17   | 1   | 1      | 19346  | 1      | 19345  | 0 | 35624    |
| S1-wms-combined_118167 | S16_vs_18440               | 91.491 | 4   | 2045   | 162  | 11  | 48211  | 50249  | 29851  | 27813  | 0 | 2802     |
| S1-wms-combined_331896 | S5_vs_124035               | 74.938 | 80  | 2019   | 427  | 61  | 468    | 2445   | 7404   | 5424   | 0 | 852      |
| S1-wms-combined_332236 | S13_vs_30167               | 94.773 | 97  | 14139  | 705  | 21  | 703    | 14822  | 53140  | 39017  | 0 | 21985    |
| S1-wms-combined_151708 | S8_vs_132472               | 76.895 | 23  | 2246   | 635  | 85  | 10361  | 13540  | 1      | 3197   | 0 | 1733     |
| S1-wms-combined_52708  | S7_vs_97737                | 78.577 | 23  | 2796   | 548  | 46  | 16339  | 19107  | 53143  | 50372  | 0 | 1797     |
| S1-wms-combined_68998  | S7_vs_135322               | 89.374 | 62  | 11067  | 1113 | 42  | 16349  | 27383  | 22258  | 11223  | 0 | 13863    |
| S1-wms-combined_252439 | S1_vs_91270                | 99.988 | 97  | 16857  | 2    | 0   | 1      | 16857  | 16857  | 1      | 0 | 31119    |
| S1-wms-combined_302166 | S1_vf_158961               | 99.905 | 57  | 42117  | 39   | 1   | 17428  | 59543  | 42248  | 132    | 0 | 77553    |
| S1-wms-combined_285012 | S8_vf_170878               | 85.079 | 1   | 630    | 92   | 2   | 76117  | 76745  | 3477   | 4105   | 0 | 641      |
| S1-wms-combined_186878 | S1_vs_143929               | 99.982 | 100 | 27678  | 5    | 0   | 99     | 27776  | 39654  | 11977  | 0 | 51084    |
| S1-wms-combined_153670 | S13_vs_90967               | 97.139 | 92  | 2552   | 69   | 4   | 1      | 2550   | 1761   | 4310   | 0 | 4305     |
| S1-wms-combined_351889 | S1_vs_155183               | 99.951 | 96  | 30748  | 3    | 1   | 1279   | 32026  | 1      | 30736  | 0 | 56687    |
| S1-wms-combined_23248  | S3_vs_119771               | 78.475 | 6   | 4539   | 829  | 110 | 38167  | 42660  | 13889  | 9454   | 0 | 2833     |
| S1-wms-combined_72167  | S13_vs_13129               | 99.973 | 99  | 18770  | 5    | 0   | 1      | 18770  | 15307  | 34076  | 0 | 34635    |
| S1-wms-combined_304377 | S7_vs_87279                | 97.235 | 43  | 10089  | 274  | 4   | 13057  | 23144  | 20423  | 10339  | 0 | 17080    |
| S1-wms-combined_57370  | S14_vs_117161              | 96.542 | 73  | 9340   | 313  | 10  | 10442  | 19776  | 1302   | 10636  | 0 | 15450    |
| S1-wms-combined_41369  | S1_vf_138157               | 80.771 | 6   | 2231   | 395  | 29  | 16270  | 18486  | 10858  | 8648   | 0 | 1712     |
| S1-wms-combined_156637 | S3_vs_127411               | 93.517 | 10  | 833    | 54   | 0   | 2705   | 3537   | 11335  | 12167  | 0 | 1240     |
| S1-wms-combined_107766 | S16_vs_19968               | 99.82  | 99  | 39354  | 71   | 0   | 166    | 39519  | 54417  | 15064  | 0 | 72280    |
| S1-wms-combined_92523  | S6_vs_44070                | 86.065 | 16  | 1349   | 157  | 2   | 27795  | 29141  | 16641  | 17987  | 0 | 1595     |
| S1-wms-combined_224578 | S11_vf_34008               | 78.275 | 6   | 1565   | 301  | 32  | 11163  | 12710  | 27010  | 25468  | 0 | 970      |
| S1-wms-combined_357373 | S1_vs_100019               | 99.865 | 78  | 2226   | 2    | 1   | 741    | 2966   | 1      | 2225   | 0 | 4093     |
| S1-wms-combined_373308 | S12_vs_164056              | 90.88  | 35  | 4309   | 365  | 23  | 9116   | 13405  | 4300   | 1      | 0 | 5755     |
| S1-wms-combined_374219 | S5_vs_117417               | 96.517 | 82  | 12374  | 426  | 5   | 4556   | 16926  | 15211  | 2840   | 0 | 20458    |
| S1-wms-combined_227003 | S7_vf_76463                | 83.178 | 10  | 2152   | 335  | 22  | 6598   | 8740   | 34307  | 36440  | 0 | 1943     |
| S1-wms-combined_227917 | S1_vs_133577               | 99.806 | 81  | 14986  | 27   | 2   | 2035   | 17019  | 37683  | 22699  | 0 | 27512    |
| S1-wms-combined_212892 | S5_vf_145604               | 84.853 | 3   | 647    | 85   | 10  | 580    | 1219   | 27596  | 26956  | 0 | 640      |
| S1-wms-combined_131270 | S1_vs_23682                | 99.91  | 99  | 36800  | 9    | 1   | 1      | 36800  | 7677   | 44452  | 0 | 67752    |
| S1-wms-combined_279492 | S6_vs_1146                 | 93.135 | 17  | 2389   | 152  | 10  | 5501   | 7884   | 13399  | 15780  | 0 | 3493     |
| S1-wms-combined_164485 | S8_vs_149700               | 92.014 | 8   | 1152   | 85   | 5   | 12560  | 13711  | 67882  | 69026  | 0 | 1611     |
| S1-wms-combined_85225  | S7_vs_73280                | 84.375 | 9   | 2016   | 286  | 24  | 27145  | 29145  | 26605  | 24604  | 0 | 1951     |
| S1-wms-combined_307323 | S3_vs_123834               | 93.732 | 22  | 4403   | 244  | 18  | 6445   | 10824  | 11639  | 7246   | 0 | 6573     |
| S1-wms-combined_94988  | S5_vs_74199                | 78.085 | 13  | 2318   | 397  | 84  | 15923  | 18174  | 20855  | 23127  | 0 | 1363     |
| S1-wms_296850          | S16_vf_6102                | 98.914 | 96  | 34893  | 364  | 5   | 1776   | 36666  | 34880  | 1      | 0 | 62321    |
| S1-wms_313991          | S1_vf_125650               | 99.92  | 57  | 4994   | 4    | 0   | 6014   | 11007  | 6751   | 1758   | 0 | 9201     |
| S1-wms_100010          | S1_vf_22149                | 99.84  | 92  | 22487  | 33   | 2   | 267    | 22751  | 22486  | 1      | 0 | 41323    |
| S1-wms_265285          | S9_vf_90871                | 99.154 | 86  | 15242  | 1829 | 99  | 17945  | 33100  | 15615  | 30813  | 0 | 17180    |
| S1-wms_185046          | S12_vf_55175               | 79.294 | 52  | 2907   | 683  | 94  | 2722   | 6590   | 22432  | 18614  | 0 | 2617     |
| S1-wms_102342          | S10_vf_120738              | 98.645 | 93  | 17051  | 230  | 1   | 18212  | 35261  | 35815  | 18765  | 0 | 30206    |
| S1-wms_4277            | S8_vs_134805               | 87.005 | 83  | 21170  | 2552 | 157 | 7374   | 28453  | 34530  | 13470  | 0 | 23669    |
| S1-wms_153615          | S1_vs_100019               | 99.963 | 98  | 2717   | 1    | 0   | 67     | 2783   | 4858   | 2142   | 0 | 5012     |
| S1-wms_236105          | S1_vf_138157               | 99.948 | 86  | 19146  | 10   | 0   | 3216   | 22361  | 1      | 19146  | 0 | 35301    |
| S1-wms_170115          | S4_vf_31682                | 98.584 | 89  | 15257  | 215  | 1   | 15058  | 30313  | 18014  | 2758   | 0 | 26976    |
| S1-wms_106115          | S13_vf_147396              | 99.975 | 100 | 16296  | 4    | 0   | 10610  | 26905  | 35175  | 18880  | 0 | 30071    |
| S1-wms_223620          | S8_vf_65522                | 98.859 | 91  | 29009  | 283  | 31  | 1102   | 30078  | 1      | 28993  | 0 | 51692    |
| S1-wms_208875          | S13_vf_66508               | 100    | 100 | 18901  | 0    | 0   | 1      | 18901  | 33222  | 14322  | 0 | 34904    |
| S1-wms_225995          | S13_vf_109235              | 99.907 | 96  | 34569  | 31   | 1   | 11727  | 46295  | 39090  | 4523   | 0 | 63658    |
| S1-wms_29288           | S7_vs_135322               | 93.961 | 30  | 2484   | 148  | 2   | 32341  | 34823  | 50304  | 47822  | 0 | 3755     |
| S1-wms_130214          | S1_vf_136526               | 99.994 | 77  | 31148  | 1    | 1   | 1      | 31148  | 1      | 31147  | 0 | 57507    |
| S1-wms_212940          | S11_vf_13033               | 96.799 | 98  | 13994  | 434  | 6   | 11596  | 25578  | 26063  | 12073  | 0 | 23348    |
| S1-wms_394571          | S1_vf_159951               | 99.99  | 100 | 101244 | 10   | 0   | 1      | 101244 | 745    | 101988 | 0 | 1.87E+05 |
| S3-wms-combined_135428 | S3_vs_39940                | 99.972 | 38  | 10828  | 3    | 0   | 17503  | 28330  | 1      | 10828  | 0 | 19980    |
| S3-wms-combined_73262  | S10_vs_58014               | 82.72  | 66  | 8947   | 1407 | 120 | 21376  | 30263  | 23818  | 32684  | 0 | 7829     |
| S3-wms-combined_45305  | S3_vs_119771               | 99.99  | 100 | 19171  | 2    | 0   | 1      | 19171  | 265    | 19435  | 0 | 35392    |
| S3-wms_23958           | S3_vf_82571                | 99.892 | 72  | 25955  | 25   | 3   | 9515   | 35467  | 1      | 25954  | 0 | 47772    |
| S3-wms_94494           | S4_vs_VIRSorter_5698-cat_2 | 96.64  | 5   | 1012   | 30   | 4   | 19338  | 20347  | 15959  | 16968  | 0 | 1677     |
| S3-wms_22744           | S3_vf_99734                | 99.886 | 99  | 46297  | 50   | 2   | 1562   | 47857  | 46295  | 1      | 0 | 85198    |
| S5-wms-combined_26061  | S14_vf_92240               | 98.169 | 94  | 12288  | 213  | 9   | 7330   | 19610  | 23924  | 11642  | 0 | 21435    |
| S5-wms-combined_161191 | S14_vs_117166              | 99.997 | 21  | 30789  | 1    | 0   | 145128 | 175916 | 1      | 30789  | 0 | 56852    |
| S5-wms-combined_134381 | S13_vs_35816               | 97.052 | 52  | 13296  | 346  | 27  | 61694  | 74956  | 24969  | 11687  | 0 | 22340    |
| S5-wms-combined_90315  | S5_vf_18461                | 99.99  | 29  | 29821  | 3    | 0   | 29093  | 58913  | 29821  | 1      | 0 | 55053    |
| S5-wms-combined_134743 | S5_vs_41663                | 100    | 59  | 57172  | 0    | 0   | 40772  | 97943  | 57172  | 1      | 0 | 1.06E+05 |
| S5-wms-combined_72410  | S5_vs_85065                | 100    | 24  | 33638  | 0    | 0   | 71400  | 105037 | 24195  | 57832  | 0 | 62118    |
| S5-wms-combined_206050 | S14_vs_96111               | 99.986 | 51  | 29345  | 4    | 0   | 10578  | 39922  | 29345  | 1      | 0 | 54168    |
| S5-wms-combined_73301  | S14_vs_117153              | 99.995 | 100 | 20824  | 1    | 0   | 1      | 20824  | 13941  | 34764  | 0 | 38450    |
| S5-wms-combined_108794 | S5_vs_40848                | 99.999 | 100 | 177204 | 1    | 0   | 1      | 177204 | 3467   | 180670 | 0 | 3.27E+05 |
| S5-wms-combined_145067 | S5_vs_69980                | 100    | 72  | 22516  | 0    | 0   | 3039   | 25554  | 22516  | 1      | 0 | 41580    |
| S5-wms-combined_207291 | S5_vs_129970               | 99.997 | 56  | 32526  | 0    | 1   | 12401  | 44926  | 32525  | 1      | 0 | 60057    |
| S5-wms-combined_29272  | S8_vs_149700               | 93.628 | 23  | 5901   | 361  | 9   | 6013   | 11902  | 46073  | 40177  | 0 | 8800     |
| S5-wms-combined_29447  | S5_vs_69083                | 100    | 28  | 32116  | 0    | 0   | 220    | 32335  | 32116  | 1      | 0 | 59308    |
| S5-wms-combined_199135 | S5_vs_36605                | 99.996 | 100 | 26478  | 1    | 0   | 1      | 26478  | 26478  | 1      | 0 | 48891    |
| S5-wms-combined_83370  | S5_vs_72532                | 99.92  | 81  | 41058  | 33   | 0   | 4090   | 45147  | 12526  | 53583  | 0 | 75638    |
| S5-wms-combined_83412  | S14_vs_115455              | 99.996 | 99  | 24313  | 1    | 0   | 5079   | 29391  | 1      | 24313  | 0 | 44893    |
| S5-wms-combined_66017  | S5_vs_145581               | 100    | 97  | 23587  | 0    | 0   | 8165   | 31751  | 1      | 23587  | 0 | 43558    |
| S5-wms-combined_66662  | S5_vs_121411               | 100    | 39  | 36545  | 0    | 0   | 57695  | 94239  | 1      | 36545  | 0 | 67486    |
| S5-wms-combined_147993 | S5_vs_59798                | 100    | 99  | 16692  | 0    | 0   | 1392   | 18083  | 1      | 16692  | 0 | 30825    |
| S5-wms-combined_156329 | S5_vs_122618               | 99.068 | 2   | 429    | 4    | 0   | 1      | 429    | 17277  | 17705  | 0 | 771      |
| S5-wms-combined_7292   | S5_vs_20268                | 100    | 100 | 14771  | 0    | 0   | 1      | 14771  | 1      | 14771  | 0 | 27277    |
| S5-wms-combined_59064  | S5_vs_131510               | 99.985 | 100 | 117646 | 18   | 0   | 1      | 117646 | 169132 | 51487  | 0 | 2.17E+05 |

|                          |                             |        |     |        |      |     |        |        |        |        |   |          |
|--------------------------|-----------------------------|--------|-----|--------|------|-----|--------|--------|--------|--------|---|----------|
| S5-wms-combined_175145   | S5_vs_109085                | 99.989 | 99  | 26577  | 0    | 2   | 1      | 26576  | 26575  | 1      | 0 | 49059    |
| S5-wms-combined_67650    | S5_vs_123256                | 99.997 | 81  | 86610  | 3    | 0   | 6355   | 92964  | 1      | 86610  | 0 | 1.60E+05 |
| S5-wms-combined_210959   | S5_vs_76500                 | 99.998 | 33  | 64407  | 1    | 0   | 122519 | 186925 | 1      | 64407  | 0 | 1.19E+05 |
| S5-wms-combined_78434    | S5_vs_21778                 | 99.996 | 99  | 144358 | 6    | 0   | 2087   | 146444 | 157096 | 12739  | 0 | 2.67E+05 |
| S5-wms-combined_204782   | S6_vs_32886                 | 99.941 | 99  | 23879  | 11   | 3   | 9302   | 33178  | 14736  | 38613  | 0 | 44016    |
| S5-wms-combined_98202    | S5_vs_142195                | 100    | 73  | 50930  | 0    | 0   | 1      | 50930  | 50930  | 1      | 0 | 94050    |
| S5-wms-combined_26971    | S11_vf_47632                | 94.477 | 33  | 8076   | 401  | 31  | 14024  | 22071  | 6      | 8064   | 0 | 12401    |
| S5-wms-combined_179241   | S5_vs_74199                 | 100    | 85  | 30526  | 0    | 0   | 3467   | 33992  | 30526  | 1      | 0 | 56371    |
| S5-wms-combined_117213   | S5_vs_63924                 | 99.989 | 49  | 27314  | 2    | 1   | 1      | 27314  | 8325   | 35637  | 0 | 50422    |
| S5-wms-combined_163165   | S5_vs_65490                 | 100    | 94  | 30653  | 0    | 0   | 1      | 30653  | 4908   | 35560  | 0 | 56606    |
| S5-wms-combined_52741    | S5_vs_86562                 | 100    | 100 | 23075  | 0    | 0   | 1      | 23075  | 3687   | 26761  | 0 | 42612    |
| S5-wms_62679             | S7_vf_67910                 | 99.911 | 96  | 15743  | 12   | 2   | 1      | 15742  | 15742  | 1      | 0 | 28993    |
| S5-wms_10783             | S5_vf_103206                | 99.995 | 98  | 18577  | 1    | 0   | 1      | 18577  | 1      | 18577  | 0 | 34300    |
| S5-wms_164032            | S5_vf_55687                 | 95.161 | 100 | 11283  | 513  | 25  | 1      | 11275  | 14211  | 2954   | 0 | 17780    |
| S5-wms_49310             | S4_vf_11308                 | 97.519 | 87  | 8264   | 184  | 7   | 920    | 9163   | 604    | 8866   | 0 | 14105    |
| S5-wms_85650             | S5_vs_80496                 | 99.979 | 100 | 61026  | 13   | 0   | 1      | 61026  | 60938  | 121963 | 0 | 1.13E+05 |
| S5-wms_210460            | S5_vs_145581                | 98.301 | 4   | 412    | 7    | 0   | 673    | 1084   | 22912  | 22501  | 0 | 723      |
| S5-wms_94965             | S5_vf_29332                 | 99.88  | 90  | 19974  | 8    | 2   | 3989   | 23947  | 17638  | 37610  | 0 | 36738    |
| S5-wms_52566             | S5_vs_124035                | 99.49  | 100 | 6468   | 33   | 0   | 1      | 6468   | 6992   | 525    | 0 | 11762    |
| S7-wms-combined_217226   | S7_vs_29595                 | 99.97  | 83  | 64326  | 18   | 1   | 1      | 64326  | 64325  | 1      | 0 | 1.19E+05 |
| S7-wms-combined_139683   | S7_vs_5236                  | 99.983 | 100 | 24118  | 4    | 0   | 8605   | 32722  | 1      | 24118  | 0 | 44516    |
| S7-wms-combined_71592    | S7_vf_13614                 | 100    | 77  | 29799  | 0    | 0   | 8953   | 38751  | 5020   | 34818  | 0 | 55029    |
| S7-wms-combined_235165   | S7_vs_49426                 | 99.997 | 100 | 31876  | 1    | 0   | 1      | 31876  | 56890  | 25015  | 0 | 58859    |
| S7-wms-combined_225260   | S7_vs_13903                 | 100    | 100 | 15940  | 0    | 0   | 1      | 15940  | 1      | 15940  | 0 | 29436    |
| S7-wms-combined_31068    | S5_vs_69980                 | 79.463 | 8   | 2196   | 383  | 54  | 1      | 2167   | 5636   | 3480   | 0 | 1495     |
| S7-wms-combined_20921    | S7_vs_137611                | 99.998 | 80  | 90273  | 2    | 0   | 51998  | 142270 | 1      | 90273  | 0 | 1.67E+05 |
| S7-wms-combined_62119    | S16_vs_127669               | 99.376 | 23  | 22259  | 129  | 8   | 76099  | 98351  | 24833  | 47087  | 0 | 40326    |
| S7-wms-combined_185016   | S5_vs_80496                 | 98.562 | 25  | 10431  | 150  | 0   | 1      | 10431  | 27299  | 37729  | 0 | 18432    |
| S7-wms-combined_174935   | S4_vs_VIRSorter_5698-cat_2  | 97.746 | 19  | 8297   | 184  | 3   | 1      | 8295   | 198    | 8493   | 0 | 14283    |
| S7-wms-combined_134452   | S7_vs_30665                 | 99.99  | 15  | 9811   | 1    | 0   | 42397  | 52207  | 1      | 9811   | 0 | 18113    |
| S7-wms-combined_134458   | S16_vf_6102                 | 74.964 | 15  | 6926   | 1469 | 199 | 22348  | 29143  | 8485   | 1695   | 0 | 2939     |
| S7-wms-combined_21693    | S8_vs_185041                | 98.306 | 78  | 23264  | 385  | 8   | 10483  | 33741  | 49913  | 26654  | 0 | 40769    |
| S7-wms-combined_2122     | S7_vs_138109                | 100    | 76  | 29629  | 0    | 0   | 12049  | 41677  | 29629  | 1      | 0 | 54715    |
| S7-wms-combined_156351   | S7_vs_135679                | 99.964 | 100 | 14020  | 5    | 0   | 1      | 14020  | 14020  | 1      | 0 | 25863    |
| S7-wms-combined_104872   | S3_vs_70508                 | 97.47  | 91  | 19839  | 496  | 6   | 8821   | 28657  | 37180  | 57014  | 0 | 33850    |
| S7-wms-combined_238231   | S11_vf_33117                | 78.715 | 1   | 1043   | 206  | 14  | 65821  | 66855  | 36792  | 37826  | 0 | 682      |
| S7-wms-combined_43950    | S10_vs_58014                | 82.625 | 31  | 8944   | 1421 | 114 | 31064  | 39951  | 32684  | 23818  | 0 | 7784     |
| S7-wms-combined_3697     | S7_vs_54322                 | 100    | 25  | 49782  | 0    | 0   | 74473  | 124254 | 56805  | 7024   | 0 | 91931    |
| S7-wms-combined_157260   | S6_vs_39025                 | 82.11  | 2   | 2152   | 365  | 17  | 112278 | 114421 | 54371  | 52232  | 0 | 1823     |
| S7-wms-combined_74829    | S7_vs_134784                | 100    | 82  | 33154  | 0    | 0   | 4293   | 37446  | 35044  | 1891   | 0 | 61224    |
| S7-wms-combined_14267    | S7_vf_117697                | 100    | 40  | 25491  | 0    | 0   | 26553  | 52043  | 1      | 25491  | 0 | 47074    |
| S7-wms-combined_106253   | S11_vs_104042               | 77.93  | 1   | 1237   | 242  | 20  | 2198   | 3407   | 23479  | 24711  | 0 | 743      |
| S7-wms-combined_239784   | S16_vs_136935               | 86.943 | 4   | 942    | 87   | 29  | 20580  | 21497  | 26788  | 27717  | 0 | 1026     |
| S7-wms-combined_189250   | S7_vs_155216                | 99.995 | 67  | 19403  | 1    | 0   | 15530  | 34933  | 1      | 19404  | 0 | 35827    |
| S7-wms-combined_137858   | S7_vs_97737                 | 99.938 | 98  | 50000  | 29   | 2   | 1      | 50000  | 24630  | 74627  | 0 | 92160    |
| S7-wms-combined_5625     | S7_vs_11081                 | 99.965 | 34  | 40232  | 14   | 0   | 27422  | 67653  | 1      | 40232  | 0 | 74217    |
| S7-wms-combined_190281   | S7_vs_55526                 | 83.12  | 1   | 936    | 144  | 11  | 62131  | 63064  | 18481  | 19404  | 0 | 841      |
| S7-wms-combined_26217    | S7_vs_138173                | 99.969 | 44  | 42156  | 12   | 1   | 37843  | 79998  | 42155  | 1      | 0 | 77774    |
| S7-wms-combined_69024    | S14_vs_117153               | 82.082 | 21  | 4370   | 737  | 38  | 2074   | 6422   | 5255   | 9599   | 0 | 3690     |
| S7-wms-combined_7205     | S7_vs_48708                 | 99.969 | 88  | 62174  | 19   | 0   | 600    | 62773  | 62174  | 1      | 0 | 1.15E+05 |
| S7-wms-combined_121062   | S7_vf_9334                  | 99.983 | 100 | 23648  | 4    | 0   | 5355   | 29002  | 40566  | 16919  | 0 | 43648    |
| S7-wms-combined_90393    | S7_vs_557                   | 100    | 100 | 19692  | 0    | 0   | 1      | 19692  | 5333   | 25024  | 0 | 36365    |
| S7-wms-combined_111004   | S7_vs_135322                | 99.927 | 81  | 35801  | 14   | 10  | 5071   | 40862  | 35798  | 1      | 0 | 65957    |
| S7-wms-combined_90728    | S7_vs_944                   | 99.974 | 99  | 23257  | 6    | 0   | 195    | 23451  | 23257  | 1      | 0 | 42915    |
| S7-wms-combined_40779    | S17_vs_127519               | 98.01  | 69  | 5076   | 89   | 10  | 14114  | 19183  | 23904  | 18835  | 0 | 8804     |
| S7-wms-combined_28138    | S7_vs_16344                 | 99.982 | 92  | 28325  | 5    | 0   | 2605   | 30929  | 28325  | 1      | 0 | 52279    |
| S7-wms-combined_224523   | S16_vs_34021                | 99.325 | 100 | 19119  | 111  | 1   | 1      | 19119  | 12384  | 31484  | 0 | 34575    |
| S7-wms-combined_163980   | S3_vs_89485                 | 99.985 | 89  | 20218  | 3    | 0   | 1677   | 21894  | 11996  | 32213  | 0 | 37320    |
| S7-wms-combined_72070    | S17_vs_117507               | 93.003 | 27  | 6417   | 415  | 25  | 22600  | 28999  | 1239   | 7638   | 0 | 9332     |
| S7-wms-combined_147158   | S7_vs_73280                 | 99.937 | 48  | 19161  | 11   | 1   | 3      | 19163  | 19884  | 39043  | 0 | 35316    |
| S7-wms-combined_218379   | S7_vs_47050                 | 99.997 | 39  | 36988  | 1    | 0   | 1      | 36988  | 36988  | 1      | 0 | 68299    |
| S7-wms-combined_107679_0 | S7_vs_119679                | 99.823 | 59  | 40003  | 67   | 4   | 1      | 40001  | 11155  | 51155  | 0 | 73475    |
| S7-wms-combined_107679_1 | S10_vs_106834               | 79.276 | 6   | 1935   | 375  | 21  | 17125  | 19045  | 14754  | 12832  | 0 | 1328     |
| S7-wms_113137            | S7_vf_39724                 | 100    | 99  | 36889  | 0    | 0   | 3      | 36891  | 1      | 36889  | 0 | 68122    |
| S7-wms_123954            | S17_vf_140653               | 92.053 | 49  | 9664   | 725  | 37  | 2000   | 11646  | 20708  | 11071  | 0 | 13551    |
| S7-wms_53338             | S7_vf_89668                 | 99.988 | 99  | 16883  | 2    | 0   | 1      | 16883  | 23     | 16905  | 0 | 31167    |
| S7-wms_157264            | S3_vf_7137                  | 99.981 | 100 | 15928  | 3    | 0   | 1      | 15928  | 1      | 15928  | 0 | 29397    |
| S7-wms_239833            | S7_vf_19866                 | 99.994 | 99  | 16468  | 1    | 0   | 1      | 16468  | 23     | 16490  | 0 | 30406    |
| S7-wms_127801            | S7_vf_8332                  | 100    | 46  | 31505  | 0    | 0   | 36900  | 68404  | 1      | 31505  | 0 | 58179    |
| S7-wms_118607            | S16_vs_86116                | 78.201 | 55  | 7404   | 1399 | 170 | 17996  | 25286  | 16     | 7317   | 0 | 4532     |
| S7-wms_159432            | S7_vf_5439                  | 99.997 | 100 | 33004  | 0    | 1   | 1      | 33004  | 33142  | 140    | 0 | 60940    |
| S7-wms_200936            | S8_vs_134805                | 93.064 | 96  | 16364  | 1084 | 41  | 13221  | 29561  | 18185  | 34520  | 0 | 23883    |
| S7-wms_151112            | S7_vf_114476                | 100    | 38  | 10873  | 0    | 0   | 1      | 10873  | 10873  | 1      | 0 | 20079    |
| S7-wms_244425            | S10_vf_36880                | 97.256 | 97  | 27695  | 731  | 27  | 38974  | 66659  | 78667  | 50993  | 0 | 46906    |
| S7-wms_244866            | S7_vf_27309                 | 99.955 | 100 | 26772  | 5    | 4   | 1      | 26772  | 26765  | 1      | 0 | 49365    |
| S17-wms-combined_157468  | S5_vs_65490                 | 72.956 | 11  | 2507   | 605  | 61  | 19550  | 22015  | 25978  | 28452  | 0 | 806      |
| S17-wms-combined_233761  | S10_vs_14557                | 93.302 | 11  | 1896   | 127  | 0   | 1      | 1896   | 61788  | 59893  | 0 | 2798     |
| S17-wms-combined_56006   | S17_vs_110666               | 99.943 | 73  | 70350  | 37   | 2   | 12005  | 82353  | 1      | 70348  | 0 | 1.30E+05 |
| S17-wms-combined_56061   | S5_vs_130294                | 76.48  | 12  | 4898   | 975  | 138 | 101121 | 105907 | 26371  | 31202  | 0 | 2499     |
| S17-wms-combined_223748  | S17_vs_133231               | 99.979 | 100 | 4859   | 1    | 0   | 1      | 4859   | 8659   | 3801   | 0 | 8968     |
| S17-wms-combined_79709   | S5_vs_69980                 | 79.583 | 19  | 3737   | 658  | 86  | 2955   | 6641   | 3544   | 7225   | 0 | 2577     |
| S17-wms-combined_90378   | S4_vs_VIRSorter_27316-cat_2 | 83.659 | 33  | 4382   | 637  | 69  | 17148  | 21485  | 50311  | 54653  | 0 | 4026     |
| S17-wms-combined_179771  | S17_vs_117507               | 100    | 60  | 25659  | 0    | 0   | 738    | 26396  | 25659  | 1      | 0 | 47384    |
| S17-wms-combined_2234    | S5_vf_122568                | 92.568 | 51  | 15044  | 998  | 90  | 23746  | 38738  | 39202  | 24228  | 0 | 21477    |
| S17-wms-combined_258087  | S16_vf_36146                | 96.296 | 75  | 15495  | 520  | 43  | 3824   | 19293  | 17210  | 1745   | 0 | 25385    |
| S17-wms-combined_136622  | S3_vs_81793                 | 95.034 | 8   | 745    | 37   | 0   | 25800  | 26544  | 52631  | 53375  | 0 | 1171     |

|                         |                             |        |     |       |      |     |        |        |        |        |   |          |
|-------------------------|-----------------------------|--------|-----|-------|------|-----|--------|--------|--------|--------|---|----------|
| S17-wms-combined_203701 | S8_vs_179208                | 99.821 | 81  | 57584 | 99   | 4   | 1      | 57582  | 57582  | 1      | 0 | 1.06E+05 |
| S17-wms-combined_158354 | S16_vs_136935               | 92.101 | 5   | 2228  | 169  | 7   | 13137  | 15360  | 5816   | 8040   | 0 | 3133     |
| S17-wms-combined_247494 | S5_vs_69980                 | 76.493 | 4   | 1842  | 363  | 56  | 16453  | 18256  | 3440   | 1631   | 0 | 939      |
| S17-wms-combined_126600 | S5_vs_7444                  | 82.056 | 44  | 3093  | 506  | 45  | 5149   | 8219   | 4266   | 1201   | 0 | 2591     |
| S17-wms-combined_171305 | S17_vs_43307                | 100    | 50  | 19701 | 0    | 0   | 1      | 19701  | 22799  | 42499  | 0 | 36381    |
| S17-wms-combined_248321 | S13_vs_35816                | 98.629 | 35  | 18094 | 242  | 3   | 98275  | 116362 | 24960  | 43053  | 0 | 32034    |
| S17-wms-combined_193958 | S17_vf_97671                | 100    | 18  | 18558 | 0    | 0   | 82525  | 101082 | 19897  | 1340   | 0 | 34271    |
| S17-wms-combined_47860  | S9_vs_4558                  | 80.256 | 82  | 6964  | 1286 | 74  | 48108  | 55026  | 44902  | 37983  | 0 | 5160     |
| S17-wms-combined_259811 | S4_vs_VIRSorter_30222-cat_2 | 99.338 | 64  | 16308 | 94   | 13  | 1031   | 17332  | 87349  | 71050  | 0 | 29505    |
| S17-wms-combined_127688 | S7_vf_5439                  | 98.554 | 95  | 19534 | 222  | 4   | 29029  | 45560  | 34248  | 50766  | 0 | 29192    |
| S17-wms-combined_260343 | S8_vf_170878                | 81.982 | 40  | 4268  | 736  | 30  | 22384  | 26636  | 26023  | 30272  | 0 | 3591     |
| S17-wms-combined_72837  | S14_vf_117147               | 97.194 | 88  | 12294 | 322  | 13  | 16277  | 28559  | 15918  | 3637   | 0 | 20770    |
| S17-wms-combined_16309  | S16_vs_127905               | 92.096 | 4   | 544   | 43   | 0   | 18098  | 18641  | 18595  | 18052  | 0 | 767      |
| S17-wms-combined_185239 | S8_vs_125717                | 79.349 | 7   | 1167  | 227  | 14  | 30472  | 31631  | 21770  | 22929  | 0 | 808      |
| S17-wms-combined_39687  | S14_vs_3251                 | 99.948 | 100 | 19402 | 10   | 0   | 1      | 19402  | 14745  | 34146  | 0 | 35774    |
| S17-wms-combined_140517 | S8_vs_185041                | 74.877 | 15  | 1624  | 370  | 33  | 15158  | 16762  | 21996  | 23600  | 0 | 704      |
| S17-wms-combined_106940 | S7_vf_5801                  | 89.4   | 29  | 2783  | 281  | 13  | 19119  | 21894  | 10857  | 8082   | 0 | 3493     |
| S17-wms-combined_186314 | S4_vs_VIRSorter_2744-cat_3  | 84.932 | 5   | 1825  | 218  | 33  | 63551  | 65351  | 12090  | 10299  | 0 | 1794     |
| S17-wms-combined_130215 | S14_vs_30439                | 99.491 | 86  | 18873 | 89   | 5   | 6696   | 25565  | 34044  | 15176  | 0 | 34313    |
| S17-wms-combined_75892  | S13_vs_148294               | 81.511 | 15  | 2396  | 392  | 39  | 20421  | 22775  | 29230  | 31615  | 0 | 1923     |
| S17-wms-combined_175924 | S11_vs_52577                | 75.836 | 34  | 5682  | 1203 | 136 | 13419  | 19005  | 7373   | 12979  | 0 | 2730     |
| S17-wms-combined_199440 | S7_vs_6626                  | 97.629 | 80  | 9741  | 186  | 24  | 13840  | 23569  | 44403  | 34697  | 0 | 16667    |
| S17-wms-combined_199746 | S17_vs_116640               | 99.976 | 35  | 20806 | 5    | 0   | 6812   | 27617  | 2      | 20807  | 0 | 38394    |
| S17-wms-combined_66123  | S7_vs_83100                 | 99.417 | 84  | 10471 | 61   | 0   | 8814   | 19284  | 1050   | 11520  | 0 | 18999    |
| S17-wms-combined_9864   | S8_vs_149700                | 79.804 | 31  | 4793  | 909  | 52  | 35602  | 40365  | 32563  | 27801  | 0 | 3434     |
| S17-wms-combined_253499 | S17_vs_157209               | 99.974 | 97  | 42973 | 2    | 1   | 576    | 43548  | 43342  | 379    | 0 | 79287    |
| S17-wms_124308          | S14_vs_32499                | 96.585 | 94  | 14552 | 480  | 13  | 1      | 14543  | 40325  | 25782  | 0 | 24103    |
| S17-wms_235536          | S17_vf_21718                | 99.997 | 100 | 30415 | 1    | 0   | 1      | 30415  | 949    | 31363  | 0 | 56161    |
| S17-wms_116248          | S11_vf_104070               | 78.573 | 58  | 10216 | 1951 | 200 | 4676   | 14776  | 12921  | 23013  | 0 | 6519     |
| S17-wms_29082           | S11_vf_34224                | 98.401 | 74  | 29840 | 473  | 3   | 11787  | 41624  | 29838  | 1      | 0 | 52458    |
| S17-wms_254872          | S17_vf_128147               | 99.92  | 99  | 6243  | 5    | 0   | 1      | 6243   | 561    | 6803   | 0 | 11502    |
| S17-wms_266511          | S17_vf_177199               | 99.997 | 100 | 35820 | 0    | 1   | 1      | 35820  | 35819  | 1      | 0 | 66140    |
| S12-wms-combined_321174 | S12_vs_188833               | 99.898 | 100 | 16622 | 17   | 0   | 15500  | 32121  | 1      | 16622  | 0 | 30601    |
| S12-wms-combined_401379 | S12_vs_137069               | 99.99  | 100 | 10338 | 1    | 0   | 1      | 10338  | 10338  | 1      | 0 | 19086    |
| S12-wms-combined_401383 | S12_vs_183891               | 99.975 | 95  | 4005  | 1    | 0   | 1      | 4005   | 4005   | 1      | 0 | 7391     |
| S12-wms-combined_184338 | S8_vs_50431                 | 84.462 | 28  | 7929  | 1198 | 28  | 37132  | 45044  | 10404  | 2494   | 0 | 7786     |
| S12-wms-combined_368462 | S8_vs_149700                | 79.304 | 31  | 6610  | 1266 | 92  | 35649  | 42200  | 34366  | 27801  | 0 | 4534     |
| S12-wms-combined_385270 | S12_vs_75098                | 100    | 99  | 41466 | 0    | 0   | 1      | 41466  | 41466  | 1      | 0 | 76574    |
| S12-wms-combined_201125 | S12_vf_60224                | 99.996 | 24  | 54526 | 2    | 0   | 165792 | 220317 | 1      | 54526  | 0 | 1.01E+05 |
| S12-wms-combined_368562 | S5_vs_131510                | 92.463 | 77  | 16798 | 1206 | 51  | 5231   | 21994  | 96448  | 113219 | 0 | 23952    |
| S12-wms-combined_351847 | S8_vs_4153                  | 98.193 | 98  | 12067 | 206  | 5   | 876    | 12931  | 1019   | 13084  | 0 | 21065    |
| S12-wms-combined_117628 | S3_vs_122706                | 90.112 | 1   | 627   | 57   | 3   | 57937  | 58559  | 3332   | 2707   | 0 | 809      |
| S12-wms-combined_17617  | S7_vs_6626                  | 96.359 | 66  | 15106 | 499  | 39  | 36517  | 51591  | 33990  | 18905  | 0 | 24801    |
| S12-wms-combined_2176   | S5_vs_21778                 | 82.346 | 8   | 2310  | 432  | 20  | 6776   | 70066  | 14549  | 12255  | 0 | 1731     |
| S12-wms-combined_151843 | S12_vs_48045                | 99.994 | 26  | 32825 | 2    | 0   | 21039  | 53863  | 32825  | 1      | 0 | 60606    |
| S12-wms-combined_18287  | S7_vs_4956                  | 96.39  | 43  | 26818 | 902  | 49  | 45437  | 72211  | 35149  | 8355   | 0 | 44100    |
| S12-wms-combined_320262 | S9_vs_2799                  | 97.867 | 73  | 18327 | 385  | 5   | 1      | 18325  | 54267  | 35945  | 0 | 31673    |
| S12-wms-combined_2450   | S5_vs_69083                 | 99.981 | 38  | 31347 | 5    | 1   | 50592  | 81938  | 32120  | 775    | 0 | 57852    |
| S12-wms-combined_320727 | S14_vs_74067                | 99.682 | 75  | 52155 | 161  | 5   | 94741  | 146894 | 200667 | 252817 | 0 | 95387    |
| S12-wms-combined_371541 | S11_vs_79831                | 95.928 | 12  | 4273  | 156  | 10  | 29418  | 33678  | 8904   | 4638   | 0 | 6911     |
| S12-wms-combined_120133 | S12_vs_99092                | 100    | 69  | 29908 | 0    | 0   | 1      | 29908  | 5354   | 35261  | 0 | 55230    |
| S12-wms-combined_71235  | S4_vs_VIRSorter_27316-cat_2 | 76.386 | 26  | 3985  | 826  | 94  | 14465  | 18387  | 50326  | 54257  | 0 | 2039     |
| S12-wms-combined_189323 | S12_vs_23796                | 99.997 | 76  | 63354 | 2    | 0   | 1      | 63354  | 1      | 63354  | 0 | 1.17E+05 |
| S12-wms-combined_190114 | S2_vs_10289                 | 79.04  | 29  | 3769  | 719  | 56  | 9589   | 13328  | 11073  | 14799  | 0 | 2518     |
| S12-wms-combined_256299 | S12_vs_111286               | 99.959 | 92  | 49063 | 10   | 3   | 4356   | 53411  | 49194  | 135    | 0 | 90483    |
| S12-wms-combined_156234 | S7_vs_134583                | 98.778 | 65  | 23903 | 285  | 5   | 1      | 23898  | 1233   | 25133  | 0 | 42516    |
| S12-wms-combined_323943 | S7_vs_135322                | 80.742 | 8   | 1698  | 308  | 13  | 29525  | 31214  | 1985   | 299    | 0 | 1306     |
| S12-wms-combined_191570 | S12_vs_150812               | 99.982 | 85  | 22142 | 2    | 2   | 3986   | 26127  | 36712  | 14573  | 0 | 40865    |
| S12-wms-combined_23517  | S1_vs_21439                 | 78.102 | 4   | 3046  | 620  | 40  | 21038  | 24061  | 23404  | 26424  | 0 | 1886     |
| S12-wms-combined_375343 | S11_vs_79831                | 98.254 | 17  | 4182  | 73   | 0   | 21169  | 25350  | 18895  | 23076  | 0 | 7319     |
| S12-wms-combined_325418 | S8_vs_115928                | 93.474 | 50  | 12029 | 773  | 12  | 22681  | 34704  | 81002  | 93023  | 0 | 17854    |
| S12-wms-combined_41160  | S12_vs_28661                | 99.777 | 95  | 21498 | 44   | 4   | 483    | 21978  | 27374  | 5879   | 0 | 39430    |
| S12-wms-combined_7174   | S13_vs_20167                | 87.921 | 62  | 9256  | 1050 | 53  | 1723   | 10935  | 36149  | 26919  | 0 | 10837    |
| S12-wms-combined_358010 | S12_vs_167155               | 82.911 | 2   | 749   | 107  | 16  | 49810  | 50551  | 21451  | 22185  | 0 | 654      |
| S12-wms-combined_91231  | S12_vs_99219                | 99.996 | 100 | 49609 | 2    | 0   | 1      | 49609  | 51797  | 2189   | 0 | 91600    |
| S12-wms-combined_107942 | S11_vs_104064               | 96.568 | 99  | 30917 | 1012 | 30  | 2      | 30890  | 26657  | 57552  | 0 | 51169    |
| S12-wms-combined_293354 | S12_vs_94042                | 99.97  | 92  | 36599 | 10   | 1   | 3468   | 40065  | 2435   | 39033  | 0 | 67523    |
| S12-wms-combined_75733  | S12_vf_188846               | 99.966 | 100 | 2940  | 1    | 0   | 1      | 2940   | 2722   | 5661   | 0 | 5424     |
| S12-wms-combined_393703 | S14_vs_67094                | 80.254 | 16  | 1889  | 340  | 29  | 4196   | 6068   | 3379   | 1508   | 0 | 1391     |
| S12-wms-combined_358797 | S3_vs_56292                 | 98.859 | 62  | 15689 | 175  | 4   | 300    | 15986  | 52533  | 36847  | 0 | 27977    |
| S12-wms-combined_25459  | S9_vs_2799                  | 81.271 | 2   | 1180  | 202  | 17  | 35581  | 36749  | 47629  | 46458  | 0 | 937      |
| S12-wms-combined_359190 | S8_vs_185041                | 91.792 | 45  | 16338 | 1289 | 42  | 36389  | 52695  | 9711   | 26027  | 0 | 22694    |
| S12-wms-combined_259783 | S8_vs_206526                | 99.107 | 98  | 33822 | 294  | 5   | 11597  | 45415  | 1      | 33817  | 0 | 60778    |
| S12-wms-combined_260036 | S4_vf_12614                 | 92.864 | 3   | 1107  | 74   | 5   | 2382   | 3485   | 1110   | 6      | 0 | 1602     |
| S12-wms-combined_210942 | S3_vs_127411                | 91.155 | 60  | 3663  | 293  | 20  | 8095   | 11750  | 15600  | 11962  | 0 | 4940     |
| S12-wms-combined_328554 | S12_vs_142625               | 100    | 100 | 43415 | 0    | 0   | 1      | 43415  | 80692  | 37278  | 0 | 80173    |
| S12-wms-combined_329242 | S5_vs_65490                 | 79.266 | 11  | 3188  | 594  | 52  | 46056  | 49208  | 25978  | 29133  | 0 | 2163     |
| S12-wms-combined_345948 | S4_vs_VIRSorter_27316-cat_2 | 76.242 | 37  | 4268  | 894  | 104 | 14581  | 18785  | 54536  | 50326  | 0 | 2154     |
| S12-wms-combined_313953 | S12_vs_153780               | 99.998 | 100 | 61118 | 1    | 0   | 1      | 61118  | 61281  | 164    | 0 | 1.13E+05 |
| S12-wms-combined_245755 | S14_vs_117161               | 83.032 | 72  | 8522  | 1262 | 144 | 11240  | 19670  | 23993  | 32421  | 0 | 7557     |
| S12-wms-combined_111524 | S12_vs_26336                | 99.994 | 60  | 48766 | 3    | 0   | 1      | 48766  | 67092  | 18327  | 0 | 90038    |
| S12-wms-combined_297545 | S15_vs_3868                 | 99.157 | 39  | 23716 | 195  | 2   | 29802  | 53514  | 33905  | 57618  | 0 | 42682    |
| S12-wms-combined_129554 | S7_vs_6626                  | 75.138 | 17  | 4887  | 1100 | 94  | 5629   | 10441  | 42769  | 37924  | 0 | 2187     |
| S12-wms-combined_129799 | S16_vf_97279                | 97.633 | 55  | 27075 | 625  | 11  | 40343  | 67411  | 1      | 27065  | 0 | 46433    |
| S12-wms-combined_282594 | S12_vs_86928                | 99.996 | 44  | 26839 | 1    | 0   | 15499  | 42337  | 41629  | 14791  | 0 | 49557    |
| S12-wms-combined_264425 | S12_vf_79666                | 99.866 | 99  | 41164 | 42   | 1   | 5374   | 46524  | 46218  | 5055   | 0 | 75698    |



|                         |                             |        |     |       |      |     |        |        |        |        |   |          |
|-------------------------|-----------------------------|--------|-----|-------|------|-----|--------|--------|--------|--------|---|----------|
| S12-wms-combined_299293 | S11_vf_84303                | 74.794 | 15  | 4360  | 949  | 117 | 52642  | 56920  | 29921  | 25631  | 0 | 1825     |
| S12-wms-combined_98046  | S8_vs_149700                | 78.923 | 2   | 1504  | 285  | 26  | 68293  | 69780  | 44578  | 46065  | 0 | 992      |
| S12-wms-combined_31761  | S6_vs_54606                 | 72.725 | 11  | 4462  | 972  | 194 | 20175  | 24533  | 11678  | 7359   | 0 | 1271     |
| S12-wms-combined_99704  | S14_vs_96111                | 96.081 | 51  | 16278 | 628  | 9   | 15873  | 32142  | 1      | 16276  | 0 | 26517    |
| S12-wms-combined_132907 | S12_vs_79785                | 99.565 | 98  | 40727 | 154  | 7   | 626    | 41330  | 1398   | 42123  | 0 | 74206    |
| S12-wms-combined_250551 | S12_vs_141337               | 99.998 | 97  | 40473 | 1    | 0   | 1269   | 41741  | 44369  | 3897   | 0 | 74735    |
| S12-wms-combined_368190 | S12_vf_16374                | 99.997 | 53  | 59768 | 2    | 0   | 3482   | 63249  | 59768  | 1      | 0 | 1.10E+05 |
| S12-wms-combined_157167 | S12_vs_164056               | 99.971 | 88  | 3403  | 1    | 0   | 481    | 3883   | 6664   | 3262   | 0 | 6279     |
| S12-wms-combined_164656 | S12_vs_32669                | 100    | 100 | 24358 | 0    | 0   | 1      | 24358  | 1      | 24358  | 0 | 44981    |
| S12-wms_184276          | S12_vf_173666               | 99.935 | 99  | 30950 | 20   | 0   | 20     | 30668  | 1      | 30650  | 0 | 56490    |
| S12-wms_235125          | S12_vf_55175                | 99.6   | 100 | 12497 | 50   | 0   | 11093  | 23589  | 1      | 12497  | 0 | 22801    |
| S12-wms_17950           | S15_vs_1407                 | 98.983 | 92  | 7372  | 74   | 1   | 4499   | 11870  | 1706   | 9076   | 0 | 13197    |
| S12-wms_352846          | S12_vf_188830               | 100    | 100 | 38917 | 0    | 0   | 28954  | 67870  | 1      | 38917  | 0 | 71867    |
| S12-wms_386692          | S12_vf_174374               | 99.945 | 100 | 34590 | 19   | 0   | 1      | 34590  | 34590  | 1      | 0 | 63771    |
| S12-wms_202803          | S8_vf_72773                 | 98.54  | 94  | 18358 | 238  | 12  | 10336  | 28663  | 23930  | 42287  | 0 | 32389    |
| S12-wms_336780          | S12_vs_133070               | 98.186 | 8   | 441   | 8    | 0   | 8957   | 9397   | 131663 | 132103 | 0 | 771      |
| S12-wms_193565          | S17_vs_110666               | 79.622 | 31  | 16493 | 2986 | 298 | 1      | 16323  | 33876  | 50163  | 0 | 11490    |
| S12-wms_161239          | S11_vf_104070               | 81.863 | 43  | 4433  | 745  | 51  | 14637  | 19043  | 36162  | 31763  | 0 | 3677     |
| S12-wms_44817           | S5_vf_110171                | 93.802 | 94  | 11036 | 601  | 65  | 23980  | 34968  | 36290  | 47289  | 0 | 16513    |
| S12-wms_179388          | S11_vf_84303                | 97.227 | 96  | 21781 | 577  | 11  | 23677  | 45451  | 34626  | 12867  | 0 | 36851    |
| S12-wms_12658           | S12_vf_69136                | 99.903 | 55  | 32030 | 30   | 1   | 26593  | 58621  | 137    | 32166  | 0 | 58975    |
| S12-wms_15700           | S3_vf_2186                  | 97.923 | 99  | 26005 | 519  | 17  | 1      | 25994  | 38190  | 12196  | 0 | 45011    |
| S12-wms_401366          | S12_vf_128794               | 99.96  | 100 | 40062 | 16   | 0   | 5029   | 45090  | 1      | 40062  | 0 | 73892    |
| S12-wms_401372          | S12_vf_188824               | 100    | 100 | 72979 | 0    | 0   | 14932  | 87910  | 87909  | 14931  | 0 | 1.35E+05 |
| S2-wms-combined_207832  | S3_vf_99734                 | 97.993 | 92  | 13603 | 268  | 3   | 29467  | 43068  | 23646  | 10048  | 0 | 23603    |
| S2-wms-combined_248329  | S2_vs_4368                  | 99.99  | 66  | 20545 | 2    | 0   | 11106  | 31650  | 20983  | 439    | 0 | 37929    |
| S2-wms-combined_31084   | S7_vs_48708                 | 77.385 | 31  | 7190  | 1520 | 84  | 11859  | 18997  | 57086  | 49952  | 0 | 4172     |
| S2-wms-combined_196783  | S7_vs_69630                 | 83.914 | 11  | 1579  | 246  | 7   | 28042  | 29616  | 6841   | 8415   | 0 | 1502     |
| S2-wms-combined_165833  | S14_vf_58919                | 86.515 | 68  | 12621 | 1602 | 76  | 6614   | 19164  | 20753  | 8163   | 0 | 13786    |
| S2-wms-combined_62377   | S13_vs_152223               | 99.964 | 99  | 60900 | 10   | 1   | 4      | 60903  | 60888  | 1      | 0 | 1.12E+05 |
| S2-wms-combined_72725   | S11_vs_104049               | 94.444 | 46  | 6750  | 346  | 27  | 22333  | 29074  | 6778   | 13506  | 0 | 10360    |
| S2-wms-combined_62519   | S4_vs_VIRSorter_4959-cat_2  | 99.816 | 41  | 34265 | 62   | 1   | 7917   | 42180  | 34360  | 96     | 0 | 62925    |
| S2-wms-combined_218002  | S6_vs_12945                 | 97.878 | 46  | 34587 | 702  | 27  | 41654  | 76226  | 37406  | 2838   | 0 | 59775    |
| S2-wms-combined_166665  | S6_vs_1146                  | 98.199 | 89  | 13603 | 230  | 11  | 32492  | 46086  | 36531  | 50126  | 0 | 23749    |
| S2-wms-combined_62839   | S8_vf_187742                | 72.201 | 3   | 5047  | 1238 | 131 | 16568  | 21533  | 57166  | 62128  | 0 | 1395     |
| S2-wms-combined_197577  | S3_vs_127445                | 98.536 | 98  | 43028 | 594  | 28  | 21370  | 64386  | 27698  | 70700  | 0 | 75935    |
| S2-wms-combined_208559  | S9_vs_2799                  | 78.521 | 8   | 2542  | 506  | 37  | 33281  | 35801  | 15884  | 18406  | 0 | 1633     |
| S2-wms-combined_229529  | S13_vf_66508                | 94.27  | 1   | 1431  | 70   | 8   | 7979   | 9401   | 35724  | 34298  | 0 | 2178     |
| S2-wms-combined_126134  | S11_vs_104049               | 80.893 | 12  | 2240  | 412  | 14  | 6040   | 8271   | 9655   | 7424   | 0 | 1751     |
| S2-wms-combined_74387   | S16_vs_92150                | 74.1   | 5   | 3278  | 757  | 80  | 36461  | 39694  | 29660  | 26431  | 0 | 1266     |
| S2-wms-combined_147065  | S11_vs_3277                 | 98.944 | 21  | 26693 | 282  | 0   | 103892 | 130584 | 30777  | 4085   | 0 | 47731    |
| S2-wms-combined_137119  | S7_vs_134583                | 77.564 | 25  | 7988  | 1614 | 147 | 81703  | 89519  | 17313  | 25133  | 0 | 4623     |
| S2-wms-combined_116221  | S11_vf_47632                | 98.516 | 34  | 17180 | 252  | 2   | 21664  | 38840  | 6      | 17185  | 0 | 30310    |
| S2-wms-combined_157934  | S6_vs_10314                 | 74.751 | 2   | 2216  | 474  | 69  | 73807  | 75964  | 7306   | 9482   | 0 | 913      |
| S2-wms-combined_64692   | S13_vs_148294               | 97.681 | 20  | 6424  | 130  | 15  | 37911  | 44330  | 11277  | 17685  | 0 | 11020    |
| S2-wms-combined_127080  | S12_vs_81729                | 92.694 | 64  | 4038  | 258  | 20  | 12280  | 16307  | 23582  | 27592  | 0 | 5788     |
| S2-wms-combined_13246   | S5_vs_30490                 | 81.887 | 6   | 8530  | 1382 | 119 | 218362 | 226805 | 16635  | 8183   | 0 | 7042     |
| S2-wms-combined_199384  | S12_vs_14467                | 92.81  | 19  | 1808  | 123  | 7   | 15223  | 17027  | 15899  | 14096  | 0 | 2612     |
| S2-wms-combined_55495   | S1_vs_62409                 | 97.533 | 82  | 8997  | 190  | 25  | 2846   | 11826  | 1      | 8981   | 0 | 15356    |
| S2-wms-combined_158821  | S4_vs_VIRSorter_13488-cat_2 | 75.842 | 52  | 5936  | 1220 | 170 | 11107  | 16934  | 537    | 6366   | 0 | 2820     |
| S2-wms-combined_210822  | S5_vs_109527                | 93.541 | 11  | 5063  | 315  | 10  | 40354  | 45409  | 24761  | 29818  | 0 | 7528     |
| S2-wms-combined_24549   | S11_vs_104049               | 89.92  | 9   | 2252  | 221  | 3   | 51988  | 54235  | 29939  | 27690  | 0 | 2896     |
| S2-wms-combined_170845  | S8_vs_185041                | 88.87  | 36  | 5867  | 628  | 21  | 6928   | 12776  | 31885  | 37744  | 0 | 7193     |
| S2-wms-combined_159670  | S1_vs_143929                | 94.342 | 6   | 813   | 44   | 2   | 35637  | 36448  | 15383  | 14572  | 0 | 1245     |
| S2-wms-combined_181391  | S14_vs_3251                 | 95.111 | 9   | 3968  | 186  | 5   | 114724 | 118687 | 30183  | 34146  | 0 | 6246     |
| S2-wms-combined_200390  | S9_vs_88286                 | 86.188 | 11  | 7689  | 1030 | 21  | 30584  | 38255  | 796    | 8469   | 0 | 8287     |
| S2-wms-combined_233107  | S5_vs_65490                 | 98.184 | 72  | 10020 | 163  | 10  | 6176   | 16186  | 20563  | 10554  | 0 | 17477    |
| S2-wms-combined_57293   | S5_vs_130294                | 77.139 | 39  | 4908  | 941  | 144 | 14230  | 19027  | 31207  | 26371  | 0 | 2680     |
| S2-wms-combined_191613  | S1_vs_145792                | 91.144 | 25  | 5375  | 414  | 34  | 14602  | 19921  | 1      | 5368   | 0 | 7232     |
| S2-wms-combined_98888   | S4_vs_VIRSorter_3006-cat_1  | 95.807 | 38  | 13499 | 559  | 4   | 86150  | 99646  | 49541  | 36048  | 0 | 21786    |
| S2-wms-combined_181849  | S7_vs_87279                 | 89.372 | 3   | 1289  | 117  | 14  | 6693   | 7968   | 28322  | 29603  | 0 | 1604     |
| S2-wms-combined_201205  | S16_vs_173096               | 96.286 | 66  | 11200 | 390  | 18  | 18021  | 29207  | 30126  | 18940  | 0 | 18354    |
| S2-wms-combined_78670   | S14_vf_56130                | 86.325 | 41  | 5031  | 643  | 35  | 26230  | 31237  | 9963   | 4955   | 0 | 5437     |
| S2-wms-combined_140996  | S5_vf_122568                | 97.59  | 20  | 25930 | 600  | 21  | 113454 | 139370 | 15141  | 41058  | 0 | 44398    |
| S2-wms-combined_58563   | S9_vs_90851                 | 82.246 | 43  | 10730 | 1707 | 160 | 34324  | 44958  | 19154  | 8528   | 0 | 9079     |
| S2-wms-combined_174241  | S3_vs_119605                | 93.61  | 33  | 13553 | 834  | 28  | 37436  | 50970  | 28472  | 14934  | 0 | 20201    |
| S2-wms-combined_110215  | S14_vs_9162                 | 79.159 | 2   | 1569  | 301  | 21  | 3536   | 5088   | 53481  | 51923  | 0 | 1062     |
| S2-wms-combined_122457  | S11_vs_104049               | 88.67  | 5   | 2639  | 288  | 9   | 22737  | 25367  | 27194  | 29829  | 0 | 3206     |
| S2-wms-combined_244564  | S11_vs_42927                | 72.591 | 18  | 4681  | 1154 | 112 | 47032  | 51648  | 40109  | 44724  | 0 | 1417     |
| S2-wms-combined_6605    | S5_vs_65490                 | 79.266 | 6   | 3188  | 594  | 52  | 18271  | 21423  | 25978  | 29133  | 0 | 2163     |
| S2-wms-combined_225908  | S3_vs_122706                | 95.209 | 11  | 12105 | 557  | 19  | 99704  | 111799 | 9501   | 21591  | 0 | 19119    |
| S2-wms-combined_113619  | S13_vs_83447                | 99.941 | 100 | 35571 | 3    | 3   | 1      | 35571  | 21098  | 56650  | 0 | 65555    |
| S2-wms-combined_227800  | S16_vs_34751                | 86.224 | 3   | 980   | 126  | 8   | 1953   | 2926   | 1476   | 500    | 0 | 1053     |
| S2-wms-combined_52006   | S14_vs_97835                | 79.167 | 60  | 1632  | 292  | 32  | 1097   | 2711   | 11     | 1611   | 0 | 1086     |
| S2-wms-combined_4685    | S8_vs_132472                | 92.297 | 25  | 3726  | 265  | 16  | 665    | 4374   | 3720   | 1      | 0 | 5271     |
| S2-wms-combined_207000  | S5_vs_145598                | 94.742 | 45  | 5382  | 277  | 6   | 22354  | 27732  | 38361  | 32983  | 0 | 8366     |
| S2-wms_124416           | S17_vs_110666               | 80.22  | 74  | 20020 | 3563 | 326 | 38430  | 58267  | 30851  | 50655  | 0 | 14665    |
| S2-wms_156439           | S5_vf_8965                  | 96.85  | 60  | 18033 | 537  | 18  | 211    | 18231  | 1784   | 19797  | 0 | 30125    |
| S2-wms_53881            | S14_vf_114491               | 99.975 | 97  | 15913 | 3    | 1   | 478    | 16389  | 15913  | 1      | 0 | 29362    |
| S2-wms_23562            | S2_vf_3356                  | 100    | 99  | 13546 | 0    | 0   | 1      | 13546  | 13546  | 1      | 0 | 25015    |
| S2-wms_128831           | S13_vf_151045               | 99.112 | 99  | 52952 | 410  | 45  | 33370  | 86290  | 1      | 52923  | 0 | 95125    |
| S2-wms_128962           | S13_vf_11246                | 99.974 | 100 | 72445 | 19   | 0   | 1      | 72445  | 72445  | 1      | 0 | 1.34E+05 |
| S2-wms_79304            | S2_vf_16829                 | 100    | 100 | 17153 | 0    | 0   | 5      | 17157  | 17189  | 37     | 0 | 31676    |
| S2-wms_161986           | S3_vf_127405                | 95.487 | 90  | 26346 | 1155 | 30  | 2969   | 29296  | 36208  | 9879   | 0 | 42034    |
| S2-wms_130687           | S16_vs_82116                | 98.576 | 77  | 29631 | 392  | 12  | 1786   | 31389  | 66695  | 37068  | 0 | 52353    |
| S2-wms_110761           | S1_vf_125650                | 99.925 | 99  | 6707  | 5    | 0   | 1      | 6707   | 45     | 6751   | 0 | 12358    |

|                        |                                     |        |     |        |      |     |        |        |        |        |   |          |
|------------------------|-------------------------------------|--------|-----|--------|------|-----|--------|--------|--------|--------|---|----------|
| S2-wms_6424            | S11_vf_33433                        | 97.724 | 94  | 19773  | 428  | 17  | 13740  | 33500  | 75021  | 55259  | 0 | 34001    |
| S2-wms_245232          | S11_vf_10907                        | 78.964 | 16  | 2163   | 390  | 47  | 34908  | 37045  | 20907  | 18785  | 0 | 1413     |
| S2-wms_248315          | S2_vf_21511                         | 99.996 | 99  | 47745  | 1    | 1   | 16505  | 64248  | 64083  | 16339  | 0 | 88156    |
| S2-wms_248324          | S2_vf_21630                         | 100    | 100 | 27232  | 0    | 0   | 1      | 27232  | 27232  | 1      | 0 | 50289    |
| S4-wms-combined_14411  | S4_vs_VIRSorter_6022-circular-cat_1 | 99.995 | 100 | 40647  | 2    | 0   | 2863   | 43509  | 1      | 40647  | 0 | 75050    |
| S4-wms-combined_112093 | S4_vs_VIRSorter_13488-cat_2         | 99.987 | 99  | 15391  | 2    | 0   | 10467  | 25857  | 1      | 15391  | 0 | 28411    |
| S4-wms-combined_42647  | S4_vs_VIRSorter_27316-cat_2         | 77.973 | 27  | 4390   | 861  | 91  | 11786  | 16122  | 54662  | 50326  | 0 | 2652     |
| S4-wms-combined_22012  | S3_vf_99626                         | 99.86  | 87  | 23615  | 32   | 1   | 3592   | 27205  | 141    | 23755  | 0 | 43425    |
| S4-wms-combined_57963  | S11_vf_34224                        | 98.468 | 22  | 15864  | 238  | 4   | 65681  | 81539  | 29838  | 13975  | 0 | 27944    |
| S4-wms-combined_10758  | S4_vs_VIRSorter_13190-cat_2         | 99.975 | 71  | 70092  | 12   | 3   | 24455  | 83535  | 1      | 59080  | 0 | 1.09E+05 |
| S4-wms-combined_17284  | S4_vs_VIRSorter_16493-cat_2         | 99.974 | 54  | 22682  | 5    | 1   | 32844  | 55524  | 40429  | 17748  | 0 | 41851    |
| S4-wms-combined_121978 | S8_vs_185041                        | 91.31  | 24  | 20414  | 1628 | 102 | 59998  | 80312  | 5857   | 26223  | 0 | 27735    |
| S4-wms-combined_25201  | S7_vs_86377                         | 84.896 | 23  | 7018   | 1011 | 44  | 11812  | 18802  | 6996   | 1      | 0 | 7042     |
| S4-wms-combined_47565  | S8_vs_148389                        | 97.442 | 5   | 782    | 19   | 1   | 3816   | 4596   | 10885  | 10104  | 0 | 1332     |
| S4-wms-combined_41490  | S5_vs_20500                         | 98.984 | 75  | 48236  | 399  | 42  | 6363   | 54558  | 1      | 48185  | 0 | 86276    |
| S4-wms_118690          | S4_vf_10506                         | 100    | 100 | 22121  | 0    | 0   | 1      | 22121  | 22121  | 1      | 0 | 40850    |
| S4-wms_161443          | S4_vf_30103                         | 99.949 | 100 | 15635  | 1    | 4   | 48     | 15678  | 1      | 15632  | 0 | 28821    |
| S4-wms_50475           | S4_vf_20440                         | 99.973 | 63  | 63000  | 14   | 1   | 24181  | 87180  | 77     | 63073  | 0 | 1.16E+05 |
| S4-wms_141607          | S4_vf_18803                         | 99.905 | 81  | 28337  | 22   | 2   | 120    | 28451  | 28337  | 1      | 0 | 52174    |
| S4-wms_45128           | S4_vf_4891                          | 99.998 | 98  | 40481  | 1    | 0   | 1      | 40481  | 2650   | 43130  | 0 | 74749    |
| S4-wms_73990           | S4_vf_4838                          | 100    | 100 | 67580  | 0    | 0   | 1      | 67580  | 26145  | 93724  | 0 | 1.25E+05 |
| S4-wms_62635           | S4_vf_13353                         | 100    | 100 | 28687  | 0    | 0   | 15609  | 44295  | 184    | 28870  | 0 | 52975    |
| S6-wms-combined_117756 | S6_vs_56496                         | 100    | 97  | 27718  | 0    | 0   | 277    | 27994  | 27718  | 1      | 0 | 51186    |
| S6-wms-combined_135223 | S5_vs_109527                        | 99.999 | 96  | 142385 | 1    | 1   | 5529   | 147913 | 1      | 142384 | 0 | 2.63E+05 |
| S6-wms-combined_88414  | S6_vs_10314                         | 99.928 | 83  | 83767  | 28   | 16  | 1      | 83750  | 1      | 83752  | 0 | 1.54E+05 |
| S6-wms-combined_745    | S13_vs_9438                         | 99.996 | 70  | 25922  | 1    | 0   | 10893  | 36814  | 1      | 25922  | 0 | 47864    |
| S6-wms-combined_82597  | S6_vs_9784                          | 99.948 | 28  | 59906  | 25   | 2   | 15325  | 215227 | 1      | 59903  | 0 | 1.10E+05 |
| S6-wms-combined_118427 | S8_vf_170878                        | 97.052 | 26  | 21810  | 636  | 5   | 124794 | 146597 | 46644  | 24836  | 0 | 36706    |
| S6-wms-combined_118484 | S14_vs_30439                        | 97.081 | 80  | 14630  | 417  | 8   | 49     | 14670  | 33781  | 19154  | 0 | 24642    |
| S6-wms-combined_72228  | S3_vs_17168                         | 77.771 | 10  | 3392   | 658  | 73  | 113    | 3439   | 51889  | 55249  | 0 | 1999     |
| S6-wms-combined_119138 | S6_vs_39025                         | 99.998 | 93  | 57387  | 1    | 0   | 4197   | 61583  | 1      | 57387  | 0 | 1.06E+05 |
| S6-wms-combined_49909  | S6_vs_1146                          | 99.986 | 100 | 28186  | 4    | 0   | 1      | 28186  | 32607  | 4422   | 0 | 52028    |
| S6-wms-combined_113986 | S6_vs_29152                         | 100    | 100 | 34147  | 0    | 0   | 1      | 34147  | 46560  | 12414  | 0 | 63058    |
| S6-wms-combined_8508   | S5_vs_38949                         | 99.943 | 50  | 27835  | 16   | 0   | 9269   | 37103  | 16281  | 44115  | 0 | 51313    |
| S6-wms-combined_32530  | S6_vs_12945                         | 99.989 | 82  | 36605  | 4    | 0   | 8194   | 44798  | 1      | 36605  | 0 | 67575    |
| S6-wms-combined_126236 | S5_vs_124677                        | 99.999 | 100 | 69368  | 1    | 0   | 1      | 69368  | 73006  | 3639   | 0 | 1.28E+05 |
| S6-wms-combined_50721  | S5_vs_79992                         | 99.996 | 41  | 54138  | 2    | 0   | 77965  | 132102 | 1      | 54138  | 0 | 99963    |
| S6-wms-combined_138710 | S5_vs_130294                        | 99.997 | 97  | 38590  | 1    | 0   | 1      | 38590  | 38590  | 1      | 0 | 71257    |
| S6-wms-combined_56464  | S6_vs_53966                         | 100    | 62  | 21784  | 0    | 0   | 1      | 21784  | 21784  | 1      | 0 | 40228    |
| S6-wms-combined_110950 | S5_vs_30490                         | 99.976 | 99  | 33429  | 6    | 2   | 16     | 33443  | 56501  | 23074  | 0 | 61686    |
| S6-wms-combined_128972 | S5_vs_117417                        | 99.584 | 89  | 19695  | 82   | 0   | 2181   | 21875  | 19695  | 1      | 0 | 35916    |
| S6-wms-combined_91039  | S7_vf_117697                        | 99.197 | 42  | 25160  | 199  | 3   | 5767   | 30924  | 25491  | 333    | 0 | 45340    |
| S6-wms_54578           | S4_vs_VIRSorter_6022-circular-cat_1 | 94.848 | 62  | 5648   | 257  | 24  | 7344   | 12972  | 25477  | 19845  | 0 | 8787     |
| S6-wms_137591          | S6_vf_6314                          | 99.961 | 56  | 7604   | 3    | 0   | 335    | 7604   | 1      | 7600   | 0 | 14019    |
| S6-wms_138342          | S11_vf_104035                       | 100    | 100 | 89495  | 0    | 0   | 1      | 89495  | 89495  | 1      | 0 | 1.65E+05 |
| S6-wms_140743          | S5_vf_145585                        | 99.99  | 100 | 47998  | 5    | 0   | 1      | 47998  | 47998  | 1      | 0 | 88608    |
| S8-wms-combined_246389 | S8_vs_35308                         | 100    | 99  | 38635  | 0    | 0   | 2571   | 41205  | 41153  | 2519   | 0 | 71346    |
| S8-wms-combined_215102 | S3_vs_90341                         | 97.755 | 49  | 11091  | 247  | 2   | 42375  | 53464  | 33587  | 22498  | 0 | 19101    |
| S8-wms-combined_276204 | S8_vs_71212                         | 100    | 100 | 21132  | 0    | 0   | 1      | 21132  | 19049  | 40180  | 0 | 39024    |
| S8-wms-combined_276211 | S8_vs_88013                         | 99.972 | 100 | 24611  | 0    | 1   | 17853  | 42456  | 42463  | 17853  | 0 | 45402    |
| S8-wms-combined_23583  | S8_vs_9114                          | 100    | 38  | 40264  | 0    | 0   | 43816  | 84079  | 40264  | 1      | 0 | 74354    |
| S8-wms-combined_81597  | S8_vs_99362                         | 99.864 | 100 | 24282  | 30   | 2   | 1      | 24279  | 2538   | 26819  | 0 | 44654    |
| S8-wms-combined_140059 | S7_vs_56529                         | 99.991 | 99  | 21727  | 2    | 0   | 1      | 21727  | 10539  | 32265  | 0 | 40112    |
| S8-wms-combined_186054 | S8_vs_149700                        | 99.968 | 100 | 53551  | 17   | 0   | 1      | 53551  | 15806  | 69356  | 0 | 98796    |
| S8-wms-combined_25607  | S8_vs_145173                        | 99.991 | 100 | 22179  | 2    | 0   | 20576  | 42754  | 1      | 22179  | 0 | 40946    |
| S8-wms-combined_26087  | S15_vs_71968                        | 99.404 | 48  | 26856  | 154  | 4   | 28179  | 55030  | 39396  | 12543  | 0 | 48702    |
| S8-wms-combined_164289 | S8_vs_176604                        | 99.964 | 100 | 27875  | 9    | 1   | 1      | 27875  | 7709   | 35582  | 0 | 51419    |
| S8-wms-combined_72911  | S5_vs_10428                         | 94.32  | 1   | 581    | 33   | 0   | 30990  | 31570  | 23705  | 23125  | 0 | 891      |
| S8-wms-combined_49369  | S7_vs_42563                         | 99.488 | 63  | 18957  | 80   | 2   | 10181  | 29120  | 9868   | 28824  | 0 | 34454    |
| S8-wms-combined_234473 | S5_vs_124035                        | 99.045 | 99  | 3038   | 19   | 8   | 5      | 3037   | 8442   | 5410   | 0 | 5441     |
| S8-wms-combined_74275  | S8_vs_148389                        | 100    | 65  | 26113  | 0    | 0   | 1      | 26113  | 11619  | 37731  | 0 | 48222    |
| S8-wms-combined_270362 | S8_vs_9987                          | 99.919 | 84  | 49188  | 36   | 4   | 10377  | 59562  | 49186  | 1      | 0 | 90608    |
| S8-wms-combined_200168 | S7_vs_6626                          | 75.956 | 6   | 4891   | 1066 | 91  | 46503  | 51322  | 37917  | 42768  | 0 | 2416     |
| S8-wms-combined_97848  | S10_vs_58014                        | 87.952 | 34  | 6134   | 713  | 20  | 793    | 6910   | 6854   | 12977  | 0 | 7210     |
| S8-wms-combined_108917 | S8_vs_115958                        | 100    | 99  | 69791  | 0    | 0   | 667    | 70457  | 137050 | 67260  | 0 | 1.29E+05 |
| S8-wms-combined_225114 | S8_vs_179529                        | 99.934 | 100 | 51282  | 28   | 3   | 1      | 51279  | 52599  | 1321   | 0 | 94507    |
| S8-wms-combined_134098 | S8_vs_145173                        | 76.628 | 13  | 2088   | 415  | 59  | 7680   | 9738   | 36098  | 34055  | 0 | 1085     |
| S8-wms-combined_134284 | S8_vs_208113                        | 99.996 | 100 | 26767  | 1    | 0   | 212    | 26978  | 41644  | 14878  | 0 | 49424    |
| S8-wms-combined_226076 | S8_vf_208107                        | 99.99  | 100 | 30625  | 2    | 1   | 1      | 30625  | 30624  | 1      | 0 | 56536    |
| S8-wms-combined_169835 | S8_vs_125717                        | 99.962 | 100 | 52956  | 20   | 0   | 1      | 52956  | 1      | 52956  | 0 | 97681    |
| S8-wms-combined_239791 | S8_vs_72117                         | 99.892 | 100 | 21293  | 6    | 4   | 2      | 21277  | 11812  | 33104  | 0 | 39177    |
| S8-wms-combined_217866 | S8_vs_47265                         | 99.996 | 100 | 50262  | 1    | 1   | 42     | 50303  | 18417  | 68677  | 0 | 92804    |
| S8-wms-combined_68780  | S8_vs_208127                        | 99.971 | 65  | 20685  | 6    | 0   | 51979  | 72663  | 11808  | 32492  | 0 | 38165    |
| S8-wms-combined_161181 | S4_vs_VIRSorter_4959-cat_2          | 92.664 | 66  | 23173  | 1661 | 31  | 8567   | 31714  | 97     | 23255  | 0 | 33338    |
| S8-wms-combined_246185 | S5_vs_86562                         | 85.968 | 2   | 1012   | 126  | 12  | 2      | 1005   | 24638  | 23635  | 0 | 1068     |
| S8-wms_270             | S8_vf_208115                        | 100    | 99  | 3507   | 0    | 0   | 1894   | 5400   | 1      | 3507   | 0 | 6477     |
| S8-wms_127191          | S8_vf_163760                        | 99.992 | 100 | 38123  | 3    | 0   | 21865  | 59987  | 1      | 38123  | 0 | 70384    |
| S8-wms_58515           | S12_vf_174374                       | 98.718 | 33  | 3900   | 46   | 4   | 15400  | 19297  | 33777  | 29880  | 0 | 6922     |
| S8-wms_244525          | S8_vf_203044                        | 100    | 100 | 17376  | 0    | 0   | 1      | 17376  | 17388  | 13     | 0 | 32088    |
| S8-wms_152831          | S8_vf_101283                        | 99.99  | 100 | 28619  | 3    | 0   | 1      | 28619  | 29450  | 832    | 0 | 52833    |
| S8-wms_48935           | S8_vf_170878                        | 99.98  | 99  | 58755  | 12   | 0   | 1      | 58755  | 58755  | 1      | 0 | 1.08E+05 |
| S8-wms_190781          | S3_vf_127409                        | 98.147 | 99  | 14681  | 264  | 6   | 1      | 14674  | 23623  | 38302  | 0 | 25597    |
| S8-wms_30498           | S8_vs_134805                        | 99.864 | 80  | 24933  | 34   | 0   | 6294   | 31226  | 37347  | 12415  | 0 | 45855    |
| S8-wms_111056          | S13_vf_3728                         | 97.743 | 87  | 22729  | 499  | 12  | 20250  | 42972  | 19557  | 42277  | 0 | 39118    |
| S8-wms_20528           | S8_vf_208126                        | 99.977 | 100 | 26226  | 1    | 2   | 1      | 26226  | 26221  | 1      | 0 | 48392    |
| S8-wms_57121           | S8_vf_93976                         | 99.993 | 76  | 26682  | 2    | 0   | 7746   | 34427  | 26682  | 1      | 0 | 49262    |

Table S1-5. Read mapping

| Reference genome: VLP-HQ-nr-vOTUs: 1231 |                      |                                      |                  |                  |                    | Reference genome: WMS-HQ-nr-vOTUs: 688 |                      |                                      |                  |                  |                    |
|-----------------------------------------|----------------------|--------------------------------------|------------------|------------------|--------------------|----------------------------------------|----------------------|--------------------------------------|------------------|------------------|--------------------|
| Sample                                  | # Cleaned reads (PE) | # Reads mapped to reference nr-vOTUs | Mapping rate (%) | # Unmapped reads | Unmapping rate (%) | Sample                                 | # Cleaned reads (PE) | # Reads mapped to reference nr-vOTUs | Mapping rate (%) | # Unmapped reads | Unmapping rate (%) |
| S1-vlp                                  | 35113882             | 12741090                             | 36.29%           | 22372792         | 63.71%             | S1-wms                                 | 144000416            | 16319573                             | 11.33%           | 127680843        | 88.67%             |
| S2-vlp                                  | 56868494             | 53293863                             | 93.71%           | 3574631          | 6.29%              | S2-wms                                 | 148218256            | 17114196                             | 11.55%           | 131104060        | 88.45%             |
| S3-vlp                                  | 174177994            | 120181758                            | 69.00%           | 53996236         | 31.00%             | S3-wms                                 | 12026424             | 1244734                              | 10.35%           | 10781690         | 89.65%             |
| S4-vlp                                  | 47904786             | 38373316                             | 80.10%           | 9531470          | 19.90%             | S4-wms                                 | 53444298             | 3980159                              | 7.45%            | 49464139         | 92.55%             |
| S5-vlp                                  | 65733438             | 31012444                             | 47.18%           | 34720994         | 52.82%             | S5-wms                                 | 186273684            | 21308808                             | 11.44%           | 164964876        | 88.56%             |
| S6-vlp                                  | 68149392             | 55096198                             | 80.85%           | 13053194         | 19.15%             | S6-wms                                 | 57739286             | 7700678                              | 13.34%           | 50038608         | 86.66%             |
| S7-vlp                                  | 81075886             | 65132881                             | 80.34%           | 15943005         | 19.66%             | S7-wms                                 | 137959384            | 16360994                             | 11.86%           | 121598390        | 88.14%             |
| S8-vlp                                  | 183020194            | 121979288                            | 66.65%           | 61040906         | 33.35%             | S8-wms                                 | 90880674             | 11462097                             | 12.61%           | 79418577         | 87.39%             |
| S9-vlp                                  | 71023532             | 59039474                             | 83.13%           | 11984058         | 16.87%             | S9-wms                                 | 87343694             | 6561914                              | 7.51%            | 80781780         | 92.49%             |
| S10-vlp                                 | 73760336             | 22080498                             | 29.94%           | 51679838         | 70.06%             | S11-wms                                | 84502272             | 9987117                              | 11.82%           | 74515155         | 88.18%             |
| S11-vlp                                 | 67000402             | 34020860                             | 50.78%           | 32979542         | 49.22%             | S12-wms                                | 140008922            | 14878767                             | 10.63%           | 125130155        | 89.37%             |
| S12-vlp                                 | 85558566             | 39625666                             | 46.31%           | 45932900         | 53.69%             | S17-wms                                | 110271798            | 11923131                             | 10.81%           | 98348667         | 89.19%             |
| S13-vlp                                 | 60096768             | 31551452                             | 52.50%           | 28545316         | 47.50%             | Mean                                   | 104389092.33         | 11570180.67                          | 11.08%           | 92818911.67      | 88.92%             |
| S14-vlp                                 | 61978780             | 24937001                             | 40.23%           | 37041779         | 59.77%             | SD                                     |                      |                                      | 1.79%            |                  | 98.21%             |
| S15-vlp                                 | 32235928             | 11812670                             | 36.64%           | 20423258         | 63.36%             |                                        |                      |                                      |                  |                  |                    |
| S16-vlp                                 | 74204032             | 41380932                             | 55.77%           | 32823100         | 44.23%             |                                        |                      |                                      |                  |                  |                    |
| S17-vlp                                 | 58989106             | 7611856                              | 12.90%           | 51377250         | 87.10%             |                                        |                      |                                      |                  |                  |                    |
| Mean                                    | 76287736.24          | 45286543.94                          | 59.36%           | 31001192.29      | 40.63%             |                                        |                      |                                      |                  |                  |                    |
| SD                                      |                      |                                      | 22.34%           |                  | 77.66%             |                                        |                      |                                      |                  |                  |                    |
|                                         |                      |                                      |                  |                  |                    |                                        |                      |                                      |                  |                  |                    |
| NC1                                     | 360240               | 23180                                | 6.43%            | 337060           | 93.57%             |                                        |                      |                                      |                  |                  |                    |
| NC2                                     | 18592                | 2610                                 | 14.04%           | 15982            | 85.96%             |                                        |                      |                                      |                  |                  |                    |
| NC3                                     | 111664               | 16079                                | 14.40%           | 95585            | 85.60%             |                                        |                      |                                      |                  |                  |                    |

Table S1-6. VLP\_avg\_cov

| VOIUs         | NC1_vlp | NC2_vlp | NC3_vlp | S1_vlp_ME | S2_vlp_SHHC | S3_vlp_ME | S4_vlp_SHHC | S5_vlp_ME | S6_vlp_SHHC | S7_vlp_ME | S8_vlp_SHHC | S9_vlp_ME | S10_vlp_SHHC | S11_vlp_ME | S12_vlp_SHHC | S13_vlp_ME | S14_vlp_ME | S15_vlp_SHHC | S16_vlp_SHHC | S17_vlp_ME | Status | Note                                                                                                                   |                                                             |
|---------------|---------|---------|---------|-----------|-------------|-----------|-------------|-----------|-------------|-----------|-------------|-----------|--------------|------------|--------------|------------|------------|--------------|--------------|------------|--------|------------------------------------------------------------------------------------------------------------------------|-------------------------------------------------------------|
| S17_vf_140652 | 0       | 0       | 0.01    | 1.05      | 2.41        | 18.08     | 0.08        | 3.36      | 1.12        | 3.12      | 2.68        | 0.1       | 15.58        | 2.07       | 4.53         | 3.16       | 0.91       | 6.12         | 3.62         | 1.12       | 9.62   | 1.83 Shared                                                                                                            | 1. The average coverage large than 10 is highlighted in red |
| S17_vf_148103 | 0       | 0       | 0       | 0.39      | 0.31        | 0.84      | 0.11        | 0.91      | 1.06        | 693.64    | 0.88        | 0.13      | 0.93         | 0.34       | 2.62         | 0.31       | 0.36       | 0.22         | 0.92         | 312.48     | ME     | 2. By setting a threshold value at 10, those having values >10 in both ME and SHHC samples are considered as "shared". |                                                             |
| S17_vf_67042  | 0       | 0       | 0       | 0.34      | 0.42        | 0.36      | 0.06        | 0.11      | 0.13        | 0.12      | 0.55        | 0.06      | 0.38         | 0.06       | 0.28         | 0.14       | 0.12       | 0.43         | 5.37         | 192.46     | ME     |                                                                                                                        |                                                             |
| S17_vf_111931 | 0.01    | 0       | 0       | 0.57      | 0.02        | 0.57      | 0.08        | 0.18      | 0.23        | 0.27      | 0.37        | 0.25      | 0.22         | 0.17       | 14.25        | 0.37       | 0.24       | 0.24         | 0.34         | 0.29       | 79.79  | ME                                                                                                                     |                                                             |
| S17_vf_97671  | 0.01    | 0       | 0.01    | 2.15      | 0.02        | 0.52      | 0.55        | 3.81      | 0.59        | 2.91      | 0.84        | 2.22      | 1.48         | 3.88       | 3.35         | 1.29       | 2.7        | 3.31         | 4.67         | 31.52      | ME     |                                                                                                                        |                                                             |
| S17_vf_46388  | 0.01    | 0       | 0       | 0.87      | 0.04        | 0.63      | 8.31        | 0.16      | 0.16        | 0.17      | 0.58        | 0.12      | 0.58         | 0.66       | 0.43         | 0.71       | 0.28       | 0.45         | 106.38       | 222.67     | Shared |                                                                                                                        |                                                             |
| S17_vf_172132 | 0       | 0       | 0       | 0.3       | 0.04        | 0.36      | 0.01        | 0.15      | 0.22        | 619.23    | 0.97        | 0.08      | 0.29         | 0.08       | 1.42         | 0.2        | 0.11       | 0.16         | 1.05         | 288.85     | ME     |                                                                                                                        |                                                             |
| S17_vf_128147 | 0       | 0       | 0       | 1.45      | 4.55        | 24.41     | 0.08        | 9.02      | 1.95        | 11.16     | 3.91        | 0.06      | 31.05        | 4.1        | 8.63         | 8.03       | 24.01      | 14.07        | 20.81        | 50.82      | Shared |                                                                                                                        |                                                             |
| S17_vf_77057  | 0       | 0       | 0.01    | 0.37      | 0.68        | 0.69      | 0.13        | 0.39      | 0.16        | 395.03    | 0.77        | 0.12      | 0.84         | 0.39       | 0.89         | 0.44       | 0.35       | 0.26         | 0.63         | 154.25     | ME     |                                                                                                                        |                                                             |
| S17_vf_174033 | 0       | 0       | 0       | 1.68      | 0.04        | 0.64      | 0.14        | 0.19      | 0.12        | 0.18      | 0.82        | 0.13      | 2.66         | 0.28       | 4.86         | 0.63       | 0.4        | 0.47         | 23.94        | 55.63      | Shared |                                                                                                                        |                                                             |
| S17_vf_35138  | 0       | 0       | 0       | 0.41      | 0.01        | 0.17      | 0.28        | 0.17      | 0.17        | 0.28      | 0.17        | 0.17      | 0.28         | 0.17       | 0.17         | 0.17       | 0.17       | 0.17         | 0.17         | 243.07     | ME     |                                                                                                                        |                                                             |
| S17_vf_79151  | 0       | 0       | 0       | 0.85      | 0.01        | 0.47      | 18.34       | 0.24      | 0.88        | 0.21      | 0.48        | 0.27      | 0.91         | 0.46       | 1.17         | 0.23       | 0.31       | 0.27         | 12.9         | 45.31      | ME     |                                                                                                                        |                                                             |
| S17_vf_36452  | 0       | 0       | 0       | 0.26      | 0.02        | 0.53      | 0.17        | 0.27      | 0.09        | 107.18    | 0.8         | 0.09      | 1.58         | 0.1        | 0.63         | 0.46       | 0.31       | 0.26         | 0.49         | 61.23      | ME     |                                                                                                                        |                                                             |
| S17_vf_171718 | 0       | 0       | 0       | 6.07      | 1.45        | 0.37      | 0.05        | 0.2       | 0.06        | 0.57      | 0.78        | 0.18      | 0.36         | 0.31       | 1.16         | 0.44       | 116.2      | 0.28         | 15.14        | 563.74     | ME     |                                                                                                                        |                                                             |
| S17_vf_81232  | 0       | 0       | 0       | 0.94      | 0.4         | 15.18     | 0.88        | 1.56      | 1.16        | 2.82      | 3.54        | 7.88      | 21.12        | 5.41       | 7.68         | 1.36       | 58.28      | 1.35         | 17.12        | 141.82     | ME     |                                                                                                                        |                                                             |
| S17_vf_177197 | 0.01    | 0       | 0       | 0.95      | 0.08        | 0.41      | 36.61       | 0.25      | 0.16        | 134.28    | 157.96      | 0.09      | 1.69         | 0.43       | 1.09         | 0.58       | 0.34       | 0.26         | 0.81         | 61.74      | Shared |                                                                                                                        |                                                             |
| S17_vf_177197 | 0.01    | 0       | 0       | 2.32      | 2.91        | 4.75      | 29.77       | 2.81      | 2.63        | 3.22      | 21725.43    | 0.09      | 0.73         | 0.38       | 0.55         | 506.01     | 0.33       | 0.37         | 1.21         | 29.14      | Shared |                                                                                                                        |                                                             |
| S17_vf_177199 | 0       | 0       | 0       | 0.61      | 0.01        | 0.21      | 0.09        | 0.09      | 0.06        | 0.06      | 0.57        | 0.19      | 0.26         | 0.51       | 0.33         | 0.15       | 0.22       | 0.16         | 15.66        | 734.13     | ME     |                                                                                                                        |                                                             |
| S17_vf_177200 | 0.06    | 0.04    | 0       | 312.8     | 0.06        | 0.55      | 0.08        | 0.22      | 0.1         | 0.13      | 0.55        | 0.1       | 0.64         | 0.13       | 0.25         | 34.93      | 0.19       | 0.74         | 107.46       | 214.04     | Shared |                                                                                                                        |                                                             |
| S17_vf_138036 | 0       | 0       | 0       | 0.66      | 0.03        | 0.75      | 0.13        | 0.25      | 0.17        | 0.19      | 1.07        | 0.22      | 0.66         | 0.84       | 0.69         | 0.38       | 0.38       | 0.23         | 6.61         | 343.02     | ME     |                                                                                                                        |                                                             |
| S17_vf_103009 | 0.18    | 0.04    | 0       | 711.72    | 0.15        | 1.25      | 0.1         | 0.39      | 0.23        | 0.36      | 162.59      | 0.6       | 0.43         | 0.29       | 1.26         | 233.36     | 0.42       | 1.15         | 0.43         | 22         | 686.05 | Shared                                                                                                                 |                                                             |
| S17_vf_177196 | 0.01    | 0       | 0       | 0.4       | 0.01        | 0.24      | 0.3         | 0.2       | 0.27        | 0.1       | 1.58        | 0.12      | 0.37         | 0.09       | 0.29         | 0.2        | 0.14       | 0.24         | 56.29        | 110.08     | ME     |                                                                                                                        |                                                             |
| S17_vf_177202 | 0       | 0       | 0       | 0.96      | 0.24        | 0.3       | 0.07        | 0.16      | 0.09        | 1.17      | 0.51        | 0.11      | 1.11         | 0.36       | 0.26         | 0.24       | 0.36       | 4.18         | 1.74         | 42.94      | ME     |                                                                                                                        |                                                             |
| S17_vf_177203 | 0       | 0       | 0       | 0.86      | 0.05        | 0.43      | 0.06        | 0.26      | 0.17        | 166.22    | 0.41        | 0.06      | 0.28         | 0.35       | 0.49         | 0.28       | 0.79       | 0.56         | 0.68         | 31.24      | ME     |                                                                                                                        |                                                             |
| S17_vf_177210 | 0.02    | 0       | 0       | 0.92      | 0.02        | 16.93     | 0.01        | 0.08      | 0.13        | 0.13      | 0.32        | 0.09      | 1.01         | 0.6        | 0.27         | 0.4        | 0.3        | 0.21         | 1.81         | 22.37      | ME     |                                                                                                                        |                                                             |
| S17_vf_133231 | 0       | 0       | 0       | 0.58      | 0.04        | 0.37      | 0.02        | 0.29      | 0.41        | 0.18      | 0.63        | 0.19      | 0.62         | 2          | 1.92         | 0.71       | 0.2        | 0.35         | 0.88         | 30.36      | ME     |                                                                                                                        |                                                             |
| S17_vf_52890  | 0.12    | 0.01    | 0       | 82        | 1.21        | 46.76     | 0.35        | 8.06      | 24.86       | 19.73     | 54.65       | 14.73     | 48.2         | 16.34      | 44.7         | 73.29      | 26.18      | 30           | 74.95        | 328.2      | Shared |                                                                                                                        |                                                             |
| S17_vf_157109 | 0.01    | 0       | 0       | 0.64      | 0.01        | 0.54      | 0.13        | 0.23      | 0.13        | 0.54      | 0.11        | 0.28      | 0.58         | 0.11       | 0.71         | 0.19       | 0.48       | 0.51         | 54.11        | 174.89     | Shared |                                                                                                                        |                                                             |
| S17_vf_31654  | 0.01    | 0       | 0       | 0.46      | 0.04        | 0.48      | 0.18        | 0.57      | 0.19        | 0.21      | 1.09        | 0.12      | 0.71         | 0.18       | 0.76         | 0.61       | 0.39       | 0.77         | 1.09         | 32.83      | ME     |                                                                                                                        |                                                             |
| S17_vf_2079   | 0       | 0       | 0       | 31.29     | 0.01        | 39.28     | 4.91        | 0.92      | 1.19        | 1.49      | 0.92        | 0.33      | 3.08         | 11.2       | 1.92         | 5.02       | 1.48       | 45.36        | 1.37         | 174.85     | Shared |                                                                                                                        |                                                             |
| S17_vf_39515  | 0       | 0       | 0       | 0.43      | 0.03        | 1.48      | 0.154       | 0.28      | 0.1         | 0.37      | 0.59        | 0.1       | 1.79         | 67.46      | 0.52         | 0.35       | 10.86      | 0.33         | 5.24         | 59.22      | ME     |                                                                                                                        |                                                             |
| S17_vf_127519 | 0.02    | 0       | 0       | 1.63      | 0.08        | 1.73      | 40.17       | 0.38      | 2.89        | 2.11      | 0.39        | 0.21      | 0.35         | 1.11       | 1.53         | 0.33       | 0.34       | 0.51         | 15.82        | 0.73       | Shared |                                                                                                                        |                                                             |
| S17_vf_121041 | 0       | 0       | 0       | 43.06     | 0.32        | 0.87      | 1.17        | 4.32      | 3.85        | 4.25      | 2.73        | 0.43      | 1.04         | 0.98       | 0.35         | 4.77       | 4.92       | 0.48         | 35.98        | 55.87      | Shared |                                                                                                                        |                                                             |
| S17_vf_41845  | 0       | 0       | 0       | 0.56      | 0.05        | 0.38      | 0.06        | 0.3       | 0.17        | 3.16      | 0.98        | 0.12      | 0.28         | 0.95       | 0.28         | 0.44       | 1.45       | 0.27         | 2.45         | 44.5       | ME     |                                                                                                                        |                                                             |
| S17_vf_160502 | 0       | 0       | 0       | 0.87      | 0.06        | 0.35      | 0.19        | 0.15      | 0.15        | 0.15      | 0.15        | 0.15      | 0.15         | 0.15       | 0.15         | 0.15       | 0.15       | 0.15         | 0.15         | 122.46     | ME     |                                                                                                                        |                                                             |
| S17_vf_116640 | 0       | 0       | 0       | 0.58      | 0.02        | 0.23      | 0.05        | 0.16      | 0.12        | 0.11      | 0.86        | 0.05      | 0.16         | 0.09       | 0.26         | 0.16       | 0.28       | 0.4          | 0.48         | 19.9       | ME     |                                                                                                                        |                                                             |
| S17_vf_43307  | 0       | 0       | 0       | 0.37      | 0.06        | 0.38      | 0.06        | 0.18      | 0.06        | 2.59      | 4.45        | 0.06      | 0.33         | 3.99       | 1.79         | 0.62       | 0.19       | 0.19         | 12.38        | 79.43      | Shared |                                                                                                                        |                                                             |
| S17_vf_58025  | 0       | 0       | 0       | 1.08      | 0.08        | 1.48      | 0.11        | 0.17      | 1.1         | 1.28      | 1.37        | 0.17      | 1.1          | 1.28       | 1.37         | 0.17       | 1.1        | 1.28         | 1.37         | 1.16       | 14.16  | Shared                                                                                                                 |                                                             |
| S17_vf_117507 | 0.01    | 0       | 0       | 1.12      | 0.06        | 0.79      | 0.13        | 5.03      | 1.76        | 15.28     | 1040.46     | 7.77      | 0.11         | 36.52      | 1.88         | 11.9       | 19.31      | 20.69        | 0.31         | 7.68       | 40.45  | Shared                                                                                                                 |                                                             |
| S17_vf_110666 | 0.01    | 0.01    | 0       | 1.54      | 0.11        | 3.74      | 1.12        | 5.72      | 3.76        | 3.54      | 3.89        | 0.4       | 0.81         | 0.69       | 1.18         | 0.93       | 0.86       | 0.91         | 3.77         | 43.31      | ME     |                                                                                                                        |                                                             |
| S17_vf_7380   | 0       | 0       | 0       | 1.29      | 0.01        | 0.5       | 0.17        | 0.36      | 0.19        | 0.2       | 0.98        | 0.12      | 0.74         | 0.31       | 0.7          | 0.36       | 0.39       | 0.43         | 4.6          | 114.81     | ME     |                                                                                                                        |                                                             |
| S17_vf_8690   | 0       | 0       | 0       | 1.01      | 0.02        | 0.86      | 0.18        | 0.47      | 0.45        | 1.87      | 0.48        | 0.17      | 1.98         | 0.48       | 1.3          | 0.96       | 0.29       | 0.43         | 1.3          | 35.34      | ME     |                                                                                                                        |                                                             |
| S9_vf_4115    | 0       | 0       | 0.02    | 0.36      | 0.06        | 0.59      | 0.08        | 1.66      | 0.11        | 0.13      | 1.46        | 114.53    | 0.46         | 0.27       | 0.49         | 0.22       | 0.46       | 0.2          | 0.43         | 0.71       | ME     |                                                                                                                        |                                                             |
| S9_vf_28805   | 0       | 0       | 0       | 1.25      | 0.09        | 2.14      | 0.1         | 0.31      | 0.88        | 0.06      | 0.49        | 19.85     | 0.48         | 0.17       | 0.26         | 0.09       | 1.85       | 0.22         | 0.51         | 0.87       | ME     |                                                                                                                        |                                                             |
| S9_vf_19384   | 0       | 0       | 0.01    | 10.88     | 0.06        | 2.96      | 0.12        | 0.75      | 0.06        | 2.96      | 0.12        | 0.75      | 0.06         | 2.96       | 0.12         | 0.75       | 0.06       | 2.96         | 0.12         | 0.75       | Shared |                                                                                                                        |                                                             |
| S9_vf_79919   | 0       | 0       | 0       | 0.02      | 0.39        | 0.04      | 0.79        | 0.1       | 0.39        | 0.14      | 0.37        | 0.95      | 225.2        | 0.78       | 0.3          | 0.48       | 0.36       | 0.82         | 0.31         | 0.81       | 1.31   | ME                                                                                                                     |                                                             |
| S9_vf_64844   | 0.02    | 0       | 0.03    | 91.44     | 0.16        | 34.81     | 113.08      | 7.57      | 1.25        | 16.99     | 43.46       | 440.57    | 2.03         | 0.72       | 1.45         | 25.1       | 33.44      | 0.66         | 11.31        | 6.39       | Shared |                                                                                                                        |                                                             |
| S9_vf_57277   | 0       | 0       | 0.01    | 10.88     | 0.16        | 7.74      | 0.41        | 1.79      | 0.12        | 1.43      | 18.19       | 198.8     | 0.25         | 10.09      | 1.05         | 2.62       | 0.2        | 1.78         | 15.79        | 5.83       | Shared |                                                                                                                        |                                                             |
| S9_vf_34786   | 0       | 0       | 0       | 0.35      | 0.01        | 0.39      | 0.01        | 0.39      | 0.12        | 0.39      | 0.01        | 0.39      | 0.12         | 0.39       | 0.01         | 0.39       | 0.12       | 0.39         | 0.01         | 0.39       | 0.12   | ME                                                                                                                     |                                                             |
| S9_vf_934     | 0       | 0       | 0       | 0.2       | 0           | 0.37      | 0           | 0.14      | 0.12        | 0.04      | 0.23        | 25.87     | 0.22         | 0.02       | 1.08         | 0.12       | 0.25       | 0.28         | 0.24         | 0.41       | ME     |                                                                                                                        |                                                             |
| S9_vf_73311   | 0       | 0       | 0.01    | 0.48      | 0.06        | 0.97      | 0.16        | 0.37      | 0.2         | 0.2       | 0.6         | 226.33    | 0.8          | 0.64       | 0.9          | 0.57       | 0.4        | 0.55         | 0.53         | 1.34       | ME     |                                                                                                                        |                                                             |
| S9_vf_129018  | 0       | 0       | 0       | 1.4       | 0.44        | 1.74      | 0.18        | 0.3       | 0.11        | 1.74      | 0.18        | 0.3       | 0.11         | 1.74       | 0.18         | 0.3        | 0.11       | 1.74         | 0.18         | 0.3        | ME     |                                                                                                                        |                                                             |
| S9_vf_76769   | 0       | 0       | 0.02    | 0.41      | 0.02        | 0.79      | 0.1         | 0.26      | 0.13        | 0.13      | 1.01        | 384.53    | 0.89         | 0.43       | 3.57         | 0.33       | 0.38       | 18.17        | 0.49         | 0.94       | Shared |                                                                                                                        |                                                             |
| S9_vf_70236   | 0       | 0       | 0       | 0.61      | 0.04        | 0.2       | 0.02        | 0.18      | 0.14        | 0.14      | 0.26        | 175.55    | 0.23         | 0.27       | 0.3          | 0.31       | 0.22       | 0.29         | 0.27         | 0.5        | ME     |                                                                                                                        |                                                             |
| S9_vf_115507  | 0       | 0       | 0       | 1.83      | 0.01        | 1.43      | 0.18        | 0.21      | 0.15        | 1.43      | 0.18        | 0.21      | 0.15         | 1.43       | 0.18         | 0.21       | 0.15       | 1.43         | 0.18         | 0.21       | Shared |                                                                                                                        |                                                             |
| S9_vf_51656   | 0       | 0       | 2.04    | 0.83      | 0.05        | 26.98     | 1825.52     | 0.39      | 0.21        | 0.26      | 4.8         | 33667.86  | 5.02         | 5.42       | 5.46         | 0.42       | 4.52       | 2.69         | 4.37         | 9.22       | Shared |                                                                                                                        |                                                             |
| S9_vf_75363   | 0       | 0       | 0       | 0.55      | 5.25        | 0.55      | 0.05        | 0.49      | 0.19        | 0.22      | 0.66        | 20.04     | 0.98         | 0.22       | 0.97         | 0.24       | 0.36       | 0.29         | 0.65         | 1.03       | ME     |                                                                                                                        |                                                             |
| S9_vf_15012   | 0       | 0       | 0       | 0.67      | 0.02        | 0.87      | 0.16        | 0.31      | 0.16        | 0.2       | 0.78        | 23.24     | 0.56         | 0.46       | 0.9          | 0.57       | 0.59       | 0.36         | 0.53         | 0.78       | ME     |                                                                                                                        |                                                             |
| S9_vf_30847   | 0       | 0       | 0.04    | 0.62      | 0.07        | 0.19      | 0.3         | 0.08      | 0.1         | 0.19      | 0.3         | 0.08      | 0.1          | 0.19       | 0.3          | 0.08       | 0.1        | 0.19         | 0.3          | 0.08       | ME     |                                                                                                                        |                                                             |

|               |      |      |      |        |        |        |         |          |          |        |        |       |        |          |         |        |      |       |       |        |        |
|---------------|------|------|------|--------|--------|--------|---------|----------|----------|--------|--------|-------|--------|----------|---------|--------|------|-------|-------|--------|--------|
| 59_vt_42609   | 0    | 0    | 0    | 0.46   | 0.14   | 2.22   | 0.11    | 0.41     | 0.29     | 0.36   | 2.91   | 10.91 | 2.67   | 2.09     | 2.12    | 0.56   | 1.38 | 1.03  | 1.86  | 2.12   | ME     |
| 511_vt_58587  | 0    | 0    | 0    | 75.99  | 4.08   | 1.13   | 0.01    | 0.08     | 0.16     | 3.51   | 0.1    | 0.39  | 0.2    | 201.79   | 0.15    | 1.48   | 0.03 | 0.2   | 1.18  | 3.1    | ME     |
| 511_vt_13013  | 0    | 0.05 | 0.06 | 407.89 | 0.23   | 90.85  | 71.32   | 2.09     | 2.47     | 53.45  | 56.96  | 1.1   | 0.71   | 62.87    | 20.54   | 100.64 | 0.85 | 22.66 | 7.9   | 16.75  | Shared |
| 511_vt_33117  | 0.01 | 0    | 0.01 | 0.7    | 0.02   | 0.3    | 0.15    | 1.15     | 0.61     | 1.24   | 0.85   | 0.25  | 1.32   | 35.13    | 1.39    | 0.38   | 1.17 | 0.22  | 0.92  | 0.73   | ME     |
| 511_vt_33433  | 0.01 | 0    | 0    | 0.53   | 72.15  | 0.35   | 0.26    | 0.19     | 0.48     | 0.29   | 0.43   | 0.21  | 0.54   | 495.64   | 163.28  | 0.31   | 0.31 | 0.27  | 0.34  | 0.83   | Shared |
| 511_vt_66160  | 0    | 0    | 0    | 1.27   | 0.01   | 0.05   | 0.41    | 3.44     | 0.41     | 0.51   | 0.41   | 0.34  | 0.41   | 10.13    | 3.66    | 0.4    | 1.51 | 0.47  | 2.18  | 4.7    | Shared |
| 511_vt_92391  | 0    | 0    | 0    | 0.79   | 0.07   | 0.45   | 0.08    | 0.37     | 3.32     | 0.26   | 0.47   | 1.37  | 1.46   | 3997.25  | 109.94  | 0.3    | 1.09 | 0.45  | 0.82  | 2.15   | Shared |
| 511_vt_66522  | 0    | 0    | 0    | 0.64   | 0.02   | 0.15   | 0.05    | 0.2      | 0.09     | 0.12   | 0.96   | 0.07  | 0.29   | 20.56    | 0.5     | 0.32   | 0.14 | 0.14  | 1.72  | 0.4    | ME     |
| 511_vt_27845  | 0    | 0    | 0    | 0.55   | 0.02   | 0.24   | 0.05    | 0.14     | 0.1      | 0.38   | 0.41   | 0.05  | 0.29   | 48.98    | 13.38   | 0.08   | 0.17 | 0.13  | 9.01  | 0.4    | Shared |
| 511_vt_14008  | 0    | 0    | 0    | 0.64   | 0.04   | 2.61   | 0.04    | 5.96     | 0.31     | 0.17   | 1      | 0.56  | 0.42   | 94.8     | 0.35    | 0.32   | 1.17 | 0.19  | 0.26  | 0.62   | ME     |
| 511_vt_34224  | 0    | 0    | 0    | 11.83  | 0.05   | 129.09 | 18.42   | 0.36     | 0.49     | 51.23  | 0.83   | 0.26  | 3.24   | 95.97    | 2.27    | 1.94   | 0.17 | 2.55  | 0.05  | 8.75   | Shared |
| 511_vt_99751  | 0    | 0    | 0    | 0.52   | 0.19   | 0.17   | 0.05    | 0.17     | 0.11     | 0.07   | 0.24   | 0.04  | 0.32   | 17.62    | 0.17    | 0.88   | 0.21 | 0.13  | 0.17  | 0.4    | ME     |
| 511_vt_47612  | 0.01 | 0    | 0    | 26.75  | 0.05   | 213.94 | 45.74   | 3.09     | 3.06     | 13.74  | 3.09   | 1.1   | 0.33   | 69.63    | 6.06    | 3.09   | 0.31 | 1.03  | 93.86 | 0.73   | Shared |
| 511_vt_28515  | 0    | 0    | 0    | 0.45   | 0.04   | 13.78  | 0.09    | 4.59     | 0.62     | 0.2    | 31.43  | 0.38  | 33.06  | 618      | 0.65    | 9.77   | 4.03 | 1.41  | 0.57  | 1.08   | Shared |
| 511_vt_28645  | 0    | 0    | 0    | 0.34   | 0      | 1.54   | 0.13    | 0.21     | 0.29     | 0.34   | 2.78   | 0.1   | 8.8    | 285.18   | 0.4     | 2.09   | 0.35 | 0.27  | 0.46  | 2.75   | ME     |
| 511_vt_3790   | 0    | 0    | 0    | 0.74   | 0.03   | 0.06   | 0.2     | 0.41     | 0.26     | 0.24   | 1      | 0.44  | 1.5    | 63.95    | 0.87    | 0.53   | 0.75 | 0.51  | 0.81  | 1.38   | ME     |
| 511_vt_95067  | 0    | 0    | 0    | 0.71   | 0.04   | 0.27   | 0.24    | 0.24     | 0.41     | 0.33   | 0.44   | 0.15  | 0.94   | 289.81   | 0.45    | 0.34   | 0.21 | 0.29  | 0.57  | 0.58   | ME     |
| 511_vt_68693  | 0    | 0    | 0    | 0.67   | 0.02   | 0.33   | 0.01    | 2.19     | 6.24     | 0.48   | 4.24   | 0.09  | 0.54   | 95.97    | 0.75    | 0.28   | 0.31 | 0.28  | 1.09  | 3.93   | ME     |
| 511_vt_10907  | 0    | 0    | 0    | 1.1    | 0.21   | 11.92  | 0.1     | 0.28     | 0.28     | 0.21   | 0.95   | 0.87  | 0.84   | 38.05    | 2.93    | 0.58   | 0.64 | 1     | 0.96  | 1.95   | ME     |
| 511_vt_93909  | 0    | 0    | 0    | 0.37   | 0.04   | 0.87   | 0.1     | 0.87     | 0.68     | 0.39   | 1.34   | 0.26  | 0.99   | 446.47   | 0.66    | 0.64   | 0.66 | 0.66  | 0.99  | 1.31   | ME     |
| 511_vt_43997  | 0    | 0    | 0    | 0.73   | 0.03   | 0.56   | 0.18    | 0.36     | 0.26     | 0.37   | 0.79   | 0.14  | 1.14   | 89.06    | 0.79    | 0.6    | 0.51 | 0.44  | 0.72  | 1.11   | ME     |
| 511_vt_70015  | 0    | 0    | 0    | 1.07   | 0.05   | 6.31   | 0.08    | 0.75     | 0.29     | 0.35   | 1.09   | 0.16  | 11.97  | 21.89    | 1.07    | 0.63   | 0.28 | 0.83  | 0.8   | 0.82   | Shared |
| 511_vt_84305  | 0    | 0    | 0    | 1.41   | 0.02   | 0.13   | 2.51    | 1.17     | 0.1      | 0.11   | 0.46   | 0.06  | 1.62   | 21.68    | 6.75    | 0.84   | 0.2  | 0.44  | 0.42  | 0.57   | ME     |
| 511_vt_104033 | 0    | 0    | 0    | 0.53   | 0.01   | 0.3    | 0.13    | 0.17     | 0.13     | 0.08   | 0.43   | 0.1   | 0.38   | 37.56    | 0.3     | 0.16   | 0.19 | 0.21  | 0.23  | 0.45   | ME     |
| 511_vt_104034 | 0    | 0    | 0    | 1.25   | 0.03   | 0.23   | 0.05    | 0.28     | 0.24     | 0.15   | 16.87  | 0.08  | 0.83   | 15.06    | 0.62    | 0.43   | 0.23 | 0.22  | 0.29  | 0.47   | Shared |
| 511_vt_104035 | 0.07 | 0    | 0    | 25.78  | 449.65 | 25.08  | 0.08    | 24634.69 | 64096.44 | 16.48  | 23.84  | 0.11  | 33.94  | 150.58   | 60.25   | 12.59  | 0.5  | 0.38  | 0.36  | 0.61   | Shared |
| 511_vt_104044 | 0    | 0    | 0    | 1.49   | 0.02   | 0.36   | 1098.23 | 0.2      | 0.64     | 0.35   | 1.31   | 0.29  | 0.85   | 635.58   | 274.01  | 0.33   | 0.44 | 0.45  | 0.74  | 0.48   | ME     |
| 511_vt_104046 | 0    | 0    | 0    | 0.39   | 0.02   | 0.31   | 0.05    | 0.21     | 0.15     | 0.14   | 0.51   | 0.07  | 0.61   | 37.31    | 0.44    | 0.25   | 0.31 | 0.26  | 0.35  | 0.6    | ME     |
| 511_vt_104048 | 0.01 | 0    | 0    | 0.35   | 0      | 0.24   | 0.05    | 0.19     | 32.01    | 0.09   | 0.26   | 11.8  | 0.2    | 40124.46 | 7.67    | 0.19   | 5.53 | 3.04  | 4.64  | 11.07  | Shared |
| 511_vt_104052 | 0    | 0    | 0    | 1.13   | 0.13   | 0.87   | 0.09    | 0.29     | 0.23     | 0.85   | 0.43   | 0.2   | 0.13   | 6.51     | 0.11    | 0.12   | 0.42 | 0.47  | 1.32  | 0.8    | ME     |
| 511_vt_104059 | 0    | 0    | 0    | 0.75   | 0.08   | 0.74   | 0.2     | 0.36     | 3.16     | 4.89   | 100.86 | 1.54  | 2.25   | 3486.56  | 2311.55 | 0.37   | 1.48 | 1.07  | 1.34  | 2.85   | Shared |
| 511_vt_104062 | 0    | 0    | 0    | 23.39  | 0.51   | 0.42   | 0.13    | 0.1      | 0.13     | 198.94 | 0.31   | 0.07  | 0.71   | 25.7     | 0.4     | 0.18   | 0.17 | 0.21  | 0.21  | 0.42   | ME     |
| 511_vt_104070 | 0.01 | 0    | 0.01 | 0.63   | 0.09   | 476.63 | 0.07    | 0.1      | 0.21     | 0.41   | 0.71   | 0.4   | 0.49   | 80.86    | 0.49    | 0.3    | 0.14 | 0.28  | 0.23  | 0.23   | ME     |
| 511_vt_104071 | 0    | 0    | 0    | 7.08   | 0.02   | 6.56   | 0.02    | 0.14     | 2.18     | 0.06   | 0.44   | 0.79  | 0.8    | 2705.27  | 0.77    | 0.16   | 0.56 | 0.41  | 0.89  | 1.02   | ME     |
| 511_vt_84627  | 0.01 | 0    | 0    | 2.15   | 0.03   | 0.5    | 0.15    | 2.7      | 4.41     | 0.39   | 0.89   | 0.11  | 0.64   | 87.4     | 0.79    | 0.77   | 0.55 | 0.36  | 0.61  | 1.02   | ME     |
| 511_vt_40945  | 0    | 0    | 0    | 0.53   | 0.13   | 0.29   | 0.11    | 0.36     | 0.34     | 0.56   | 0.63   | 0.09  | 0.56   | 92.93    | 0.63    | 0.6    | 0.19 | 0.26  | 0.37  | 0.65   | ME     |
| 511_vt_93101  | 0    | 0.01 | 0    | 0.37   | 0.03   | 0.27   | 0.06    | 0.26     | 0.26     | 0.17   | 0.28   | 0.23  | 1.02   | 1145.43  | 0.79    | 0.43   | 0.36 | 0.42  | 1.59  | 0.6    | ME     |
| 511_vt_3006   | 0    | 0    | 0    | 0.69   | 0.02   | 0.31   | 0.07    | 0.24     | 0.14     | 0.15   | 0.48   | 0.1   | 0.48   | 24.55    | 0.23    | 0.2    | 0.3  | 0.21  | 0.29  | 0.72   | ME     |
| 511_vt_75554  | 0    | 0    | 0    | 0.86   | 0      | 0.41   | 0.61    | 0.12     | 0.99     | 0.18   | 0.79   | 0.22  | 0.69   | 923.6    | 0.55    | 0.12   | 0.28 | 0.37  | 0.4   | 0.66   | ME     |
| 511_vt_49071  | 0    | 0    | 0    | 0.79   | 0.15   | 0.08   | 0.15    | 0.08     | 0.22     | 0.15   | 0.08   | 0.22  | 0.15   | 61.86    | 0.17    | 0.68   | 0.19 | 0.16  | 0.57  | 0.67   | ME     |
| 511_vt_36748  | 0.01 | 0    | 0    | 0.75   | 0.04   | 2.91   | 0.37    | 0.68     | 0.96     | 0.44   | 0.92   | 0.1   | 0.49   | 48.96    | 1.06    | 0.99   | 0.49 | 1.06  | 4.72  | 8.17   | ME     |
| 511_vt_82368  | 0    | 0    | 0    | 0.65   | 0.01   | 0.52   | 0.43    | 0.54     | 0.52     | 0.51   | 0.64   | 0.47  | 0.92   | 350.43   | 0.7     | 0.35   | 1.26 | 0.62  | 0.64  | 1.6    | ME     |
| 511_vt_104032 | 0    | 0    | 0    | 0.61   | 0.02   | 0.53   | 0.05    | 0.26     | 1.47     | 0.18   | 0.68   | 1.14  | 0.72   | 1.2      | 1465.22 | 0.93   | 0.38 | 0.72  | 0.6   | 0.36   | ME     |
| 511_vt_104036 | 0    | 0    | 0    | 0.59   | 0.02   | 0.59   | 0.12    | 0.59     | 0.11     | 0.18   | 0.28   | 0.87  | 685.55 | 0.87     | 0.36    | 0.59   | 0.39 | 0.56  | 0.98  | 0.56   | ME     |
| 511_vt_104037 | 0.01 | 0    | 0    | 0.92   | 0.02   | 3.06   | 0.7     | 0.25     | 0.31     | 0.12   | 0.41   | 0.11  | 1.55   | 203.09   | 0.44    | 0.31   | 0.26 | 0.32  | 0.33  | 0.54   | ME     |
| 511_vt_104038 | 0    | 0    | 0    | 0.87   | 0.02   | 0.86   | 0.28    | 0.54     | 0.91     | 0.6    | 0.85   | 0.38  | 1.32   | 679.32   | 1.47    | 0.58   | 0.61 | 0.53  | 0.83  | 1.49   | ME     |
| 511_vt_104041 | 0    | 0    | 0    | 2.12   | 0.05   | 0.19   | 0.12    | 0.37     | 0.19     | 0.12   | 0.37   | 0.15  | 0.37   | 80.68    | 0.16    | 1.6    | 0.3  | 0.5   | 0.93  | 0.5    | ME     |
| 511_vt_104042 | 0    | 0    | 0    | 1.18   | 0.01   | 0.88   | 0.49    | 0.31     | 0.26     | 0.29   | 1.07   | 0.27  | 0.66   | 79.12    | 0.38    | 0.42   | 0.44 | 0.64  | 2.84  | 1.01   | ME     |
| 511_vt_104047 | 0    | 0    | 0    | 0.7    | 0.06   | 0.26   | 0.06    | 0.4      | 0.15     | 1.56   | 0.62   | 0.16  | 0.22   | 42.71    | 0.29    | 1.29   | 0.37 | 0.13  | 0.26  | 0.45   | ME     |
| 511_vt_104049 | 0    | 0.01 | 0.02 | 0.32   | 0.71   | 0.41   | 0.62    | 0.1      | 0.32     | 3.6    | 0.81   | 0.33  | 0.72   | 32.32    | 0.16    | 0.66   | 0.12 | 0.97  | 0.6   | 0.97   | ME     |
| 511_vt_104053 | 0    | 0    | 0    | 0.39   | 0.05   | 1.54   | 0.12    | 0.22     | 0.23     | 68.04  | 16.97  | 0.1   | 2.4    | 41.8     | 10.42   | 0.32   | 0.85 | 0.39  | 0.89  | 0.92   | Shared |
| 511_vt_104054 | 0    | 0    | 0    | 0.41   | 0.05   | 0.41   | 0.05    | 0.28     | 0.16     | 0.16   | 0.67   | 0.05  | 0.53   | 21.77    | 1.48    | 0.25   | 0.34 | 0.94  | 0.3   | 0.72   | ME     |
| 511_vt_104064 | 0    | 0    | 0    | 1.29   | 0.03   | 0.4    | 0.14    | 0.35     | 0.19     | 5.24   | 4.84   | 1.1   | 16.35  | 70.19    | 2362    | 0.88   | 1.09 | 0.44  | 1.03  | 6.27   | Shared |
| 511_vt_104069 | 0.01 | 0    | 0    | 0.4    | 0.02   | 0.47   | 0.06    | 0.51     | 1.63     | 0.26   | 0.59   | 0.12  | 0.16   | 17.02    | 0.59    | 0.51   | 0.16 | 0.46  | 0.33  | 0.6    | ME     |
| 511_vt_58702  | 0    | 0    | 0    | 0.4    | 0.04   | 0.44   | 0.06    | 0.51     | 0.15     | 1.1    | 0.77   | 0.12  | 0.43   | 13.17    | 0.62    | 0.25   | 0.42 | 0.51  | 0.75  | 1.43   | ME     |
| 511_vt_45658  | 0.01 | 0    | 0    | 7.27   | 0.69   | 5.09   | 1.08    | 5.35     | 5.11     | 2.32   | 4.66   | 0.76  | 13.71  | 113.75   | 15.65   | 3.42   | 6.47 | 6     | 8.09  | 19.49  | Shared |
| 511_vt_34848  | 0    | 0    | 0    | 5.94   | 0.1    | 5.94   | 1.04    | 0.89     | 1.04     | 0.89   | 1.04   | 0.89  | 1.04   | 51.26    | 0.51    | 10.82  | 0.05 | 3.26  | 3.75  | 49     | ME     |
| 511_vt_19892  | 0.01 | 0    | 0    | 1.13   | 9.39   | 0.23   | 3.98    | 0.65     | 0.38     | 0.92   | 7.78   | 2.81  | 0.32   | 20.79    | 1.72    | 0.4    | 0.24 | 0.32  | 0.39  | 0.25   | ME     |
| 511_vt_6878   | 0    | 0    | 0    | 0.43   | 0.03   | 0.28   | 0.04    | 0.45     | 0.31     | 0.15   | 0.4    | 0.25  | 0.27   | 204.29   | 0.33    | 0.26   | 0.4  | 0.26  | 0.3   | 0.72   | ME     |
| 511_vt_58930  | 0    | 0.01 | 0    | 184.65 | 0.07   | 6.19   | 3.05    | 0.3      | 0.4      | 1.98   | 0.54   | 0.28  | 0.67   | 119.09   | 18.16   | 17.66  | 0.32 | 0.17  | 11.26 | 238.63 | Shared |
| 511_vt_52577  | 0.02 | 0    | 0    | 1.06   | 0.06   | 0.49   | 0.1     | 0.62     | 0.21     | 0.42   | 0.91   | 0.1   | 0.39   | 45.87    | 0.9     | 0.53   | 0.42 | 0.67  | 1.69  | 1.69   | ME     |
| 511_vt_98193  | 0.01 | 0    | 0    | 0.63   | 0.13   | 0.46   | 0.03    | 12.07    | 0.24     | 0.23   | 2.39   | 0.23  | 0.74   | 19.31    | 0.42    | 0.38   | 0.98 | 0.57  | 1.05  | 1.18   | ME     |
|               |      |      |      |        |        |        |         |          |          |        |        |       |        |          |         |        |      |       |       |        |        |

|               |      |      |      |         |        |       |        |         |        |       |       |         |          |       |       |         |         |         |       |        |        |        |
|---------------|------|------|------|---------|--------|-------|--------|---------|--------|-------|-------|---------|----------|-------|-------|---------|---------|---------|-------|--------|--------|--------|
| S13_vf_147589 | 0    | 0    | 0    | 0.68    | 0.01   | 0.19  | 0.04   | 0.89    | 0.11   | 0.08  | 0.39  | 0.02    | 0.5      | 0.06  | 0.93  | 49.25   | 0.74    | 0.21    | 0.23  | 0.43   | ME     |        |
| S13_vf_150407 | 0    | 0    | 0    | 30.88   | 0.02   | 0.75  | 0.29   | 0.12    | 0.14   | 0.24  | 0.34  | 0.08    | 0.18     | 0.08  | 0.36  | 40.31   | 0.08    | 0.28    | 0.32  | 0.2    | ME     |        |
| S13_vf_151045 | 0.01 | 0.06 | 0    | 577.5   | 66.99  | 0.85  | 0.08   | 0.44    | 0.31   | 0.22  | 0.71  | 0.08    | 2.04     | 0.28  | 0.62  | 267.24  | 1.42    | 1.37    | 1.13  | 1.72   | Shared |        |
| S13_vf_151755 | 0    | 0    | 0    | 0.72    | 0.12   | 0.4   | 0.13   | 0.22    | 0.19   | 0.2   | 0.2   | 0.16    | 0.05     | 0.4   | 0.12  | 59.04   | 0.1     | 0.16    | 0.23  | 1.61   | Shared |        |
| S13_vf_12957  | 0.02 | 0    | 0    | 260.16  | 1.6    | 0.31  | 0.07   | 0.19    | 0.09   | 0.1   | 0.43  | 0.1     | 0.09     | 0.22  | 0.18  | 27.19   | 0.03    | 0.28    | 0.16  | 0.33   | ME     |        |
| S13_vf_15645  | 0    | 0.01 | 0.1  | 36.45   | 14.61  | 10.99 | 0.17   | 23.37   | 1.71   | 23.37 | 9     | 0.11    | 0.56     | 0.11  | 1.36  | 198.98  | 0.11    | 0.36    | 0.58  | 5.28   | Shared |        |
| S13_vf_27462  | 0    | 0.01 | 0    | 0.74    | 0.07   | 0.76  | 0.19   | 15.68   | 0.2    | 0.23  | 1     | 0.10.19 | 18941.24 | 3.11  | 3.25  | 230.12  | 2.9     | 315.83  | 5.26  | 5.25   | Shared |        |
| S13_vf_148294 | 0.01 | 0.01 | 0    | 153.07  | 4.85   | 1.35  | 0.08   | 1.32    | 2.12   | 1.03  | 2.63  | 4.94    | 0.35     | 2.99  | 0.34  | 44.11   | 1.53    | 0.41    | 1.53  | 0.95   | ME     |        |
| S13_vf_149060 | 0    | 0.02 | 0    | 83.85   | 0.04   | 0.21  | 0.03   | 0.23    | 0.1    | 0.11  | 0.55  | 0.23    | 0.43     | 0.18  | 0.35  | 61.46   | 0.18    | 0.22    | 0.39  | 0.86   | ME     |        |
| S13_vf_151510 | 0.01 | 0    | 0.01 | 0.52    | 0.07   | 0.76  | 1.55   | 3.63    | 0.17   | 0.25  | 1.76  | 3.63    | 426.81   | 0.8   | 1.23  | 64.17   | 1.03    | 0.68    | 1.33  | 1.58   | Shared |        |
| S13_vf_9438   | 0.04 | 0.03 | 0    | 120.15  | 0.07   | 0.59  | 0.1    | 194.41  | 296.71 | 0.33  | 0.91  | 0.1     | 1.01     | 3.03  | 0.38  | 68.58   | 0.29    | 0.46    | 0.4   | 0.75   | Shared |        |
| S13_vf_13129  | 0.01 | 0.02 | 0.01 | 494.99  | 0.09   | 0.36  | 0.09   | 0.57    | 0.13   | 0.29  | 0.95  | 0.21    | 0.34     | 0.16  | 0.48  | 98.91   | 0.32    | 0.79    | 0.38  | 0.47   | ME     |        |
| S13_vf_14794  | 0.02 | 0.09 | 0    | 734.08  | 0.14   | 0.08  | 0.07   | 0.23    | 0.19   | 0.18  | 0.08  | 0.31    | 0.18     | 0.08  | 0.31  | 74.81   | 0.06    | 0.31    | 0.22  | 0.31   | ME     |        |
| S13_vf_23314  | 0    | 0    | 0    | 1.64    | 0.1    | 1.29  | 0.07   | 5.33    | 0.37   | 4.27  | 3.36  | 2.07    | 1.94     | 2.35  | 1.51  | 230.41  | 11.21   | 0.43    | 5.13  | 1.34   | ME     |        |
| S13_vf_26756  | 0.07 | 0    | 0    | 14.2    | 0.08   | 1.49  | 0.16   | 0.57    | 0.26   | 0.36  | 1.78  | 0.19    | 2.1      | 0.59  | 28.12 | 113.68  | 0.82    | 0.74    | 1.28  | 1.69   | Shared |        |
| S13_vf_20101  | 0    | 0.01 | 0    | 10.56   | 0.06   | 1.52  | 0.19   | 0.56    | 0.28   | 0.45  | 57.74 | 0.64    | 4.04     | 1.86  | 0.52  | 78.16   | 1.36    | 0.55    | 1.58  | Shared |        |        |
| S13_vf_30167  | 0    | 0    | 0    | 13.36   | 0.57   | 4.54  | 0.27   | 27.14   | 1.5    | 15.54 | 8.83  | 3.3     | 6.09     | 9.61  | 5.05  | 181.07  | 34.54   | 1.67    | 15.97 | 4.98   | Shared |        |
| S13_vf_33947  | 0.02 | 0.01 | 0.01 | 1.71    | 0.05   | 1.18  | 1.05   | 1.67    | 0.28   | 1.18  | 5.37  | 0.34    | 1.09     | 48.95 | 2.13  | 100.45  | 1.25    | 0.72    | 2.02  | 1.04   | ME     |        |
| S13_vf_35816  | 0.02 | 0.08 | 0.01 | 778.44  | 0.26   | 41.56 | 194.79 | 19.15   | 2.6    | 23.61 | 90.92 | 54.11   | 4.82     | 2.02  | 4.31  | 280.1   | 65.06   | 2.67    | 21.54 | 10.15  | Shared |        |
| S13_vf_45488  | 0    | 0    | 0    | 60.81   | 0.17   | 1.44  | 0.16   | 27.53   | 50.38  | 0.32  | 2.69  | 0.23    | 1.12     | 13.16 | 1.31  | 60.82   | 0.46    | 0.65    | 0.67  | 1.65   | Shared |        |
| S13_vf_49889  | 0    | 0.03 | 0    | 73.87   | 0.04   | 0.26  | 0.04   | 0.23    | 0.14   | 0.13  | 1.77  | 0.06    | 0.43     | 0.24  | 0.5   | 32.82   | 0.29    | 0.32    | 0.73  | 1.58   | ME     |        |
| S13_vf_57267  | 0.22 | 0.02 | 0    | 72.1    | 0.15   | 1.04  | 0.22   | 0.42    | 0.25   | 0.25  | 1.26  | 0.58    | 1.46     | 0.6   | 0.88  | 239.75  | 0.59    | 0.62    | 56.71 | 170.58 | Shared |        |
| S13_vf_57429  | 0    | 0    | 0    | 12.95   | 0.31   | 1.89  | 0.17   | 0.6     | 0.26   | 0.36  | 17.34 | 0.22    | 31.67    | 0.74  | 52.59 | 113.38  | 0.81    | 0.75    | 5.57  | 1.81   | Shared |        |
| S13_vf_68102  | 0    | 0.09 | 0    | 473.7   | 0.06   | 0.54  | 0.07   | 0.42    | 0.21   | 0.24  | 0.26  | 0.08    | 0.61     | 0.23  | 0.56  | 192.67  | 0.39    | 0.95    | 0.49  | 0.9    | ME     |        |
| S13_vf_83447  | 0.04 | 0.07 | 0.02 | 345.72  | 67.67  | 2.6   | 0.52   | 6.81    | 0.61   | 3.68  | 79.74 | 875.16  | 4.7      | 1.89  | 0.62  | 171.77  | 1.58    | 3.92    | 1.41  | Shared |        |        |
| S13_vf_87108  | 0    | 0    | 0    | 7.77    | 1.17   | 17.11 | 0.63   | 0.19    | 0.1    | 0.07  | 0.27  | 0.05    | 0.15     | 0.06  | 0.31  | 28.85   | 0.11    | 0.29    | 0.23  | 0.56   | ME     |        |
| S13_vf_90907  | 0    | 0    | 0    | 56.85   | 0.07   | 0.11  | 0      | 0.16    | 0.09   | 0.01  | 0.18  | 0.09    | 0.27     | 0.01  | 0.13  | 53.07   | 0.02    | 0.23    | 2.18  | 0.53   | Shared |        |
| S13_vf_98591  | 0.01 | 0.26 | 0    | 2726.02 | 0.65   | 1.66  | 0.08   | 536.63  | 794.31 | 0.97  | 1.79  | 0.07    | 1.19     | 1.7   | 0.44  | 631.9   | 0.18    | 4.66    | 1.1   | 0.65   | Shared |        |
| S13_vf_113593 | 0    | 0.11 | 0    | 1062.8  | 0.2    | 0.68  | 0.02   | 0.3     | 0.25   | 0.33  | 0.67  | 0.05    | 0.36     | 0.49  | 0.31  | 333.41  | 0.28    | 1.75    | 0.68  | 0.59   | ME     |        |
| S13_vf_114123 | 0.01 | 0    | 0.01 | 1.56    | 0.07   | 0.65  | 0.3    | 3.74    | 0.69   | 0.17  | 1.21  | 0.1     | 0.19     | 0.85  | 1.19  | 59.85   | 1.23    | 0.55    | 1.35  | 0.85   | ME     |        |
| S13_vf_121307 | 0    | 0    | 0    | 47.08   | 0.02   | 0.25  | 0.09   | 0.65    | 0.14   | 0.14  | 0.61  | 0.15    | 0.31     | 0.12  | 0.39  | 25.92   | 0.37    | 0.38    | 0.25  | 0.65   | ME     |        |
| S13_vf_152223 | 0.06 | 0.35 | 0    | 3438.14 | 758.35 | 1.42  | 0.05   | 0.9     | 0.64   | 0.82  | 1.56  | 0.08    | 0.44     | 0.2   | 0.32  | 522.1   | 0.87    | 4.82    | 1.06  | 0.51   | Shared |        |
| S14_vf_58919  | 0    | 0    | 0    | 10.56   | 0.11   | 1.26  | 0.19   | 0.57    | 0.18   | 0.27  | 1.86  | 0.44    | 0.17     | 0.48  | 0.4   | 34.05   | 0.17    | 0.35    | 0.43  | 1.37   | ME     |        |
| S14_vf_44452  | 0    | 0    | 0    | 0.35    | 0.09   | 0.1   | 0.04   | 0.11    | 0.07   | 1.31  | 10.4  | 0.06    | 0.16     | 0.04  | 0.08  | 0.33    | 62.68   | 2.06    | 0.25  | 1.92   | Shared |        |
| S14_vf_37500  | 0    | 0    | 0    | 2.87    | 0.35   | 1.08  | 0.1    | 0.28    | 0.93   | 0.07  | 0.18  | 0.19    | 0.52     | 0.35  | 0.38  | 0.85    | 533.38  | 0.19    | 0.48  | 0.36   | ME     |        |
| S14_vf_106156 | 0    | 0    | 0    | 0.84    | 0.03   | 0.37  | 0.03   | 0.24    | 0.09   | 0.12  | 0.43  | 0.08    | 1.18     | 0.34  | 0.43  | 0.41    | 39.06   | 0.28    | 0.39  | 1.21   | ME     |        |
| S14_vf_92240  | 0.01 | 0    | 0    | 2.79    | 0.21   | 7.79  | 6.55   | 103.93  | 11.11  | 2.79  | 62.68 | 0.99    | 2.41     | 1.59  | 0.59  | 244.4   | 1.11    | 3.59    | 10.45 | Shared |        |        |
| S14_vf_85122  | 0    | 0    | 0    | 0.52    | 0.03   | 1.38  | 0.3    | 6.85    | 0.18   | 0.22  | 0.79  | 0.22    | 0.81     | 0.21  | 0.88  | 0.6     | 21.95   | 0.32    | 0.66  | 0.82   | ME     |        |
| S14_vf_99344  | 0.17 | 0    | 0    | 0.45    | 1.8    | 0.77  | 0.09   | 0.27    | 0.17   | 0.21  | 14.71 | 0.59    | 1.1      | 0.47  | 1.18  | 0.24    | 2505.39 | 0.72    | 0.56  | 1.32   | Shared |        |
| S14_vf_114493 | 2.36 | 0    | 0    | 4.35    | 279.67 | 0.09  | 0.73   | 2.82    | 3.37   | 0.09  | 4.79  | 0.35    | 2.82     | 0.39  | 0.75  | 2.17    | 0.5     | 0.13    | 0.71  | Shared |        |        |
| S14_vf_78139  | 0    | 0    | 0    | 0.38    | 0.04   | 0.23  | 0.11   | 3.61    | 0.07   | 0.11  | 0.36  | 0.07    | 0.25     | 0.08  | 0.19  | 0.18    | 31.75   | 0.17    | 0.2   | 0.48   | ME     |        |
| S14_vf_56110  | 0    | 0    | 0    | 3.12    | 0.12   | 1.08  | 4.47   | 14.69   | 0.11   | 0.81  | 1.69  | 0.07    | 0.58     | 3.06  | 1.82  | 1.58    | 24.08   | 0.81    | 8.13  | 1.15   | ME     |        |
| S14_vf_93114  | 0.16 | 0    | 0    | 0.34    | 1.3    | 0.32  | 0.02   | 1.84    | 0.18   | 0.34  | 0.57  | 0.85    | 0.48     | 0.57  | 0.48  | 3446.73 | 0.56    | 1.29    | 23.02 | ME     |        |        |
| S14_vf_48775  | 0    | 0    | 0    | 0.4     | 0.12   | 0.22  | 0.04   | 0.13    | 0.07   | 0.05  | 0.21  | 0.07    | 0.38     | 0.01  | 0.1   | 187.15  | 0.08    | 0.81    | 0.25  | 0.4    | ME     |        |
| S14_vf_115736 | 0.02 | 0    | 0    | 7.45    | 0.4    | 1.42  | 0.18   | 1.13    | 0.42   | 1.68  | 1.61  | 0.42    | 1.72     | 1.31  | 0.37  | 2.54    | 182.26  | 0.92    | 1.37  | 0.8    | ME     |        |
| S14_vf_43340  | 0    | 0    | 0    | 1.68    | 3.97   | 0.46  | 3.12   | 0.71    | 0.91   | 0.1   | 0.27  | 0.09    | 0.36     | 1.51  | 0.98  | 1.72    | 64.69   | 1.82    | 0.5   | 1.12   | ME     |        |
| S14_vf_57689  | 0.04 | 0.57 | 0.01 | 0.15    | 0.03   | 0.15  | 0.12   | 0.14    | 0.13   | 0.12  | 0.05  | 0.18    | 0.09     | 0.29  | 0.13  | 0.40    | 0.65    | 0.18    | 0.25  | 0.45   | ME     |        |
| S14_vf_109545 | 0.01 | 0    | 0    | 1.04    | 0.01   | 1.55  | 0.49   | 1.95    | 3.32   | 0.37  | 5.56  | 12.96   | 0.17     | 3.03  | 0.64  | 0.39    | 26.76   | 14.44   | 3.24  | 1.78   | Shared |        |
| S14_vf_72335  | 0    | 0    | 0    | 0.69    | 0.07   | 0.45  | 0.02   | 4.08    | 0.08   | 0.14  | 0.44  | 0.07    | 0.48     | 0.02  | 0.36  | 0.31    | 31.27   | 0.28    | 0.58  | ME     |        |        |
| S14_vf_117147 | 0    | 0    | 0    | 0.87    | 0.08   | 0.34  | 0.1    | 0.22    | 0.18   | 0.22  | 1.58  | 0.22    | 0.45     | 0.29  | 0.4   | 3.2     | 1.95    | 0.46    | 3.2   | ME     |        |        |
| S14_vf_117150 | 0    | 0.01 | 0    | 2.02    | 0.25   | 3.24  | 0.63   | 0.23    | 0.18   | 0.37  | 0.6   | 0.07    | 3.47     | 0.6   | 0.93  | 0.75    | 89.41   | 5.27    | 4.83  | 1.1    | ME     |        |
| S14_vf_72953  | 0    | 0    | 0    | 0.61    | 0.05   | 0.54  | 0.05   | 1.36    | 0.13   | 0.11  | 0.43  | 0.08    | 0.81     | 0.13  | 0.39  | 0.35    | 33.23   | 0.31    | 0.31  | 0.81   | ME     |        |
| S14_vf_117155 | 0.1  | 0.03 | 0    | 0.89    | 1.13   | 0.18  | 0.16   | 0.14    | 0.11   | 0.04  | 0.2   | 0.48    | 0.39     | 0.32  | 0.47  | 0.19    | 2051.33 | 501.52  | 0.5   | 0.95   | Shared |        |
| S14_vf_117157 | 0.02 | 0    | 0    | 0.57    | 0.27   | 0.03  | 0.13   | 0.12    | 0.16   | 0.16  | 0.41  | 0.21    | 0.74     | 58.83 | 0.74  | 394.45  | 7.22    | 0.18    | 0.6   | ME     |        |        |
| S14_vf_117162 | 0.17 | 0    | 0    | 0.72    | 1.45   | 0.28  | 0.06   | 0.27    | 0.08   | 0.09  | 0.23  | 0.57    | 0.51     | 0.53  | 0.6   | 0.12    | 2756.02 | 0.45    | 0.59  | 0.82   | ME     |        |
| S14_vf_117164 | 0    | 0    | 0    | 0.64    | 0.15   | 0.42  | 0.06   | 0.78    | 0.17   | 0.24  | 27.52 | 0.13    | 0.37     | 0.17  | 0.57  | 1.12    | 304.75  | 0.34    | 0.34  | 0.52   | Shared |        |
| S14_vf_15114  | 0.04 | 0.84 | 0    | 0.84    | 0.76   | 1.97  | 0.18   | 1.46    | 0.07   | 0.18  | 1.46  | 0.07    | 0.64     | 0.18  | 0.27  | 0.64    | 1.13    | 2.46    | 1.86  | 0.76   | ME     |        |
| S14_vf_15228  | 0.28 | 0    | 0    | 22.18   | 3.51   | 10.79 | 130.56 | 1222.83 | 118.36 | 60.75 | 4.88  | 4.02    | 0.98     | 11.58 | 97.48 | 1.02    | 40.86   | 5596.85 | 0.65  | 0.69   | 1.51   | Shared |
| S14_vf_88666  | 0    | 0    | 0    | 0.48    | 0.07   | 0.21  | 0.02   | 99.56   | 0.5    | 1.68  | 0.44  | 0.11    | 1.02     | 0.26  | 0.23  | 1.2     | 137.87  | 0.24    | 0.2   | 0.36   | ME     |        |
| S14_vf_30439  | 0    | 0    | 0    | 0.74    | 0.17   | 0.79  | 2.98   | 61.71   | 23.95  | 1.53  | 0.59  | 0.28    | 0.29     | 1.44  | 0.74  | 0.28    | 96.93   | 0.27    | 14.17 | 5.24   | Shared |        |
| S14_vf_96286  | 0    | 1.31 | 0.06 | 1.31    | 0.06   | 1.26  | 0.99   | 14.53   | 0.36   | 4.33  | 0.52  | 0.25    | 14.23    | 0.89  | 0.43  | 2.46    | 3.24    | 4.2     | 1.4   | 1.4    | Shared |        |
| S14_vf_9676   | 0.06 | 0.01 | 0    | 91.56   | 0.53   | 1.19  | 0.2    | 0.4     | 0.2    | 0.33  | 5.68  | 0.56    | 2.36     | 0.33  |       |         |         |         |       |        |        |        |

|               |      |      |      |        |       |          |        |        |        |          |        |        |         |        |          |         |        |       |         |        |        |        |
|---------------|------|------|------|--------|-------|----------|--------|--------|--------|----------|--------|--------|---------|--------|----------|---------|--------|-------|---------|--------|--------|--------|
| \$1_vf_136526 | 0.01 | 0.01 | 0    | 382.86 | 0.07  | 0.29     | 0.13   | 0.23   | 0.11   | 0.35     | 0.83   | 0.1    | 0.42    | 0.13   | 0.35     | 19.44   | 0.12   | 1.18  | 0.27    | 0.46   | ME     |        |
| \$1_vf_50591  | 0    | 0    | 0    | 71.75  | 0.05  | 0.35     | 0.04   | 0.68   | 0.09   | 0.09     | 0.17   | 0.06   | 0.2     | 0.09   | 0.17     | 29.13   | 0.24   | 0.24  | 0.24    | 0.37   | ME     |        |
| \$1_vf_138157 | 0    | 0.01 | 0    | 87.61  | 0.16  | 1.89     | 0.35   | 4.45   | 0.86   | 1.21     | 118.57 | 0.21   | 0.86    | 0.67   | 0.77     | 4.59    | 4.61   | 1.72  | 1.72    | 4.65   | Shared |        |
| \$1_vf_125660 | 0.02 | 0    | 0    | 205.81 | 25.37 | 0.3      | 0      | 0.15   | 0.13   | 0.15     | 0.69   | 0.04   | 0.17    | 0.14   | 0.26     | 13.72   | 0.09   | 0.31  | 0.3     | 0.15   | Shared |        |
| \$1_vf_6272   | 0.01 | 0    | 0    | 71.71  | 0.02  | 0.39     | 0.01   | 0.29   | 0.14   | 0.15     | 49.87  | 0.08   | 0.28    | 0.38   | 0.29     | 14.3    | 0.25   | 1.9   | 7.32    | 0.48   | Shared |        |
| \$1_vf_158961 | 0.01 | 0.01 | 0    | 115.64 | 0.04  | 0.04     | 0.11   | 0.26   | 0.11   | 0.16     | 0.04   | 0.04   | 0.11    | 0.16   | 0.07     | 17.66   | 0.27   | 0.31  | 0.27    | 0.45   | Shared |        |
| \$1_vf_159951 | 0.01 | 0.01 | 0    | 159.71 | 3.04  | 0.23     | 0.04   | 0.14   | 0.13   | 0.13     | 4.44   | 0.03   | 0.28    | 0.2    | 0.26     | 42.67   | 0.15   | 0.4   | 0.26    | 0.38   | ME     |        |
| \$1_vf_143929 | 0    | 0.01 | 0    | 58.83  | 0.09  | 0.38     | 0.33   | 0.84   | 0.31   | 0.17     | 4.09   | 0.18   | 0.47    | 0.21   | 0.39     | 5.1     | 0.24   | 0.74  | 0.34    | 0.58   | ME     |        |
| \$1_vf_133577 | 0    | 0.01 | 0    | 23.37  | 0.04  | 1.81     | 0.42   | 0.81   | 0.42   | 0.22     | 0.42   | 0.32   | 0.44    | 0.22   | 0.54     | 1.94    | 0.32   | 0.31  | 2.68    | 2.68   | ME     |        |
| \$1_vf_124439 | 0.01 | 0.01 | 0    | 60.41  | 0.06  | 0.31     | 0.02   | 0.39   | 0.35   | 0.27     | 44.41  | 0.12   | 0.66    | 0.41   | 0.43     | 3.44    | 0.24   | 0.36  | 0.32    | 0.7    | Shared |        |
| \$1_vf_155183 | 0    | 0    | 0    | 233.25 | 0.11  | 0.36     | 0.06   | 0.27   | 0.17   | 0.21     | 265.56 | 0.12   | 0.86    | 0.25   | 2.17     | 20.94   | 0.44   | 0.82  | 1.14    | 0.79   | Shared |        |
| \$1_vf_62409  | 0    | 0    | 0    | 29.05  | 30.55 | 0.32     | 0.02   | 2.09   | 2.88   | 0.04     | 1.29   | 0.08   | 0.77    | 15.79  | 19.65    | 5.19    | 0.31   | 0.18  | 0.21    | 0.52   | Shared |        |
| \$1_vf_173717 | 0.01 | 0.01 | 0    | 48.15  | 0.04  | 0.04     | 0.25   | 0.13   | 0.13   | 0.21     | 0.34   | 0.25   | 0.41    | 0.18   | 2.15     | 1.25    | 0.49   | 0.49  | 0.54    | ME     |        |        |
| \$1_vf_12682  | 0    | 0    | 0    | 116.29 | 0.1   | 1.18     | 0.08   | 0.5    | 0.13   | 0.54     | 0.69   | 0.1    | 0.65    | 0.26   | 0.34     | 11.3    | 1.3    | 0.59  | 0.42    | 0.78   | ME     |        |
| \$1_vf_3267   | 0    | 0    | 0    | 22.36  | 0     | 0.20     | 0.01   | 0.12   | 0.09   | 0.03     | 0.08   | 0.02   | 0.2     | 0.05   | 0.13     | 12      | 0.18   | 0.06  | 3.05    | 0.36   | ME     |        |
| \$1_vf_4335   | 0    | 0    | 0    | 25.84  | 0     | 0.27     | 0      | 0.28   | 0.11   | 0.09     | 0.23   | 0.04   | 1.18    | 0.17   | 0.52     | 5.51    | 0.37   | 0.18  | 0.74    | ME     |        |        |
| \$1_vf_51270  | 0    | 0    | 0    | 82.45  | 0.17  | 0.22     | 0.05   | 0.21   | 0.14   | 0.21     | 5.34   | 0.03   | 0.28    | 0.15   | 0.34     | 0.33    | 0.18   | 0.28  | 0.21    | 0.42   | ME     |        |
| \$1_vf_145792 | 0.01 | 0.01 | 0    | 51.7   | 0.06  | 0.32     | 0.1    | 0.26   | 0.1    | 0.17     | 0.68   | 0.08   | 0.53    | 0.26   | 0.33     | 3       | 0.24   | 0.39  | 1.32    | 2.14   | ME     |        |
| \$1_vf_100019 | 0    | 0    | 0    | 75.44  | 0.02  | 0.37     | 0.02   | 0.18   | 0.07   | 0.15     | 0.4    | 0.02   | 0.93    | 0.16   | 0.18     | 21.92   | 0.24   | 0.33  | 3.03    | 7.17   | ME     |        |
| \$3_vf_8058   | 0    | 0    | 0.02 | 0.44   | 0.05  | 160.56   | 0.49   | 0.22   | 0.08   | 0.11     | 0.29   | 0.27   | 0.36    | 0.17   | 0.26     | 0.21    | 0.23   | 0.21  | 0.33    | 0.59   | ME     |        |
| \$3_vf_8164   | 0    | 0    | 0.01 | 0.97   | 0.01  | 35.95    | 0.04   | 0.18   | 0.09   | 1.76     | 0.38   | 0.05   | 0.45    | 0.37   | 1.08     | 0.2     | 0.23   | 2.85  | 0.56    | 0.83   | ME     |        |
| \$3_vf_111776 | 0    | 0    | 0.33 | 0.39   | 0.39  | 3273.02  | 0.11   | 0.52   | 0.45   | 0.61     | 1.46   | 4.48   | 0.24    | 0.19   | 0.29     | 0.73    | 0.29   | 0.26  | 0.29    | 0.26   | ME     |        |
| \$3_vf_97896  | 0    | 0    | 0.53 | 0.01   | 0.32  | 0.03     | 0.38   | 0.1    | 0.17   | 0.51     | 0.11   | 0.59   | 0.5     | 0.57   | 0.37     | 1.71    | 0.26   | 0.39  | 0.98    | ME     |        |        |
| \$3_vf_111893 | 0.19 | 0    | 0.07 | 9.53   | 0.18  | 1033.62  | 0.04   | 0.22   | 0.22   | 0.42     | 0.67   | 1.63   | 0.31    | 0.25   | 44.52    | 1.51    | 2.7    | 7.5   | 9.33    | 1.5    | Shared |        |
| \$3_vf_96222  | 0.32 | 0    | 0.03 | 0.81   | 2.79  | 394.21   | 114.11 | 9.33   | 3.2    | 5.23     | 19.69  | 6.75   | 1.13    | 1.05   | 1.01     | 0.39    | 4242.9 | 0.71  | 6.67    | 355.21 | Shared |        |
| \$3_vf_30287  | 0.01 | 0    | 0.01 | 0.88   | 0.01  | 104.72   | 0.31   | 0.17   | 0.12   | 0.09     | 1.84   | 0.24   | 1.81    | 2.24   | 1.9      | 0.42    | 0.23   | 16.14 | 0.31    | 0.52   | Shared |        |
| \$3_vf_46361  | 0    | 0    | 0.05 | 0.88   | 0.07  | 1175.91  | 12.07  | 107.94 | 0.46   | 0.81     | 1.55   | 1.49   | 2.13    | 0.98   | 1.54     | 1.25    | 1.49   | 1.32  | 1.46    | 1.32   | Shared |        |
| \$3_vf_33389  | 0.13 | 0    | 0.04 | 2.19   | 0.39  | 432.12   | 0.04   | 0.11   | 0.09   | 0.23     | 0.35   | 648.36 | 0.39    | 1.23   | 0.62     | 1.62    | 0.34   | 0.46  | 1708.36 | 143.32 | Shared |        |
| \$3_vf_73597  | 0    | 0    | 0.01 | 0.72   | 0.15  | 29.14    | 0.2    | 0.21   | 0.31   | 0.27     | 0.71   | 0.18   | 1.07    | 39.36  | 0.48     | 0.75    | 13.02  | 1.11  | 1.33    | 7.03   | ME     |        |
| \$3_vf_25165  | 0    | 0    | 0.08 | 0.35   | 0.15  | 760.08   | 0.08   | 0.16   | 0.08   | 0.17     | 0.16   | 0.16   | 0.15    | 0.15   | 24.97    | 304.55  | 0.3    | 0.5   | 0.7     | 0.59   | Shared |        |
| \$3_vf_7422   | 0.02 | 0    | 0.13 | 3.69   | 0.1   | 1786.39  | 11.26  | 0.28   | 0.19   | 0.31     | 0.48   | 2.28   | 0.19    | 0.41   | 0.09     | 0.96    | 0.15   | 0.1   | 0.23    | 0.36   | Shared |        |
| \$3_vf_17748  | 2.3  | 0    | 0.26 | 5.56   | 4.29  | 2420.18  | 0.62   | 6.39   | 5.72   | 2553.43  | 51.27  | 32.15  | 1473.23 | 0.83   | 4.68     | 8970.63 | 0.56   | 0.51  | 12.24   | 1.51   | Shared |        |
| \$3_vf_1286   | 0    | 0    | 0.04 | 0.57   | 0.08  | 316.37   | 0.12   | 0.13   | 0.12   | 0.12     | 0.76   | 0.25   | 0.16    | 766.38 | 55.67    | 0.84    | 0.45   | 0.53  | 0.63    | 0.63   | ME     |        |
| \$3_vf_11428  | 0    | 0    | 0.01 | 0.89   | 0.04  | 48.13    | 29.85  | 0.33   | 0.26   | 0.35     | 0.53   | 0.22   | 0.62    | 2.67   | 0.55     | 0.33    | 1.33   | 3.64  | 14.61   | 30.54  | Shared |        |
| \$3_vf_18080  | 0    | 0    | 0.02 | 10.76  | 4.19  | 165.31   | 2.79   | 0.63   | 0.32   | 1.84     | 3.05   | 0.61   | 3.96    | 11.07  | 6.31     | 14.19   | 97.44  | 6.01  | 8.24    | 18.44  | ME     |        |
| \$3_vf_104041 | 0.01 | 0    | 0    | 0.75   | 0.12  | 31.5     | 2.8    | 3.39   | 0.13   | 1.96     | 0.66   | 0.28   | 2.06    | 0.86   | 0.56     | 0.32    | 86.78  | 0.38  | 1.64    | 0.99   | ME     |        |
| \$3_vf_50078  | 0    | 0    | 0.03 | 1.53   | 3.21  | 200.09   | 2.76   | 0.09   | 1.64   | 0.09     | 0.68   | 0.24   | 1.18    | 0.29   | 3.15     | 1.18    | 0.51   | 1.14  | 0.77    | ME     |        |        |
| \$3_vf_82571  | 0    | 0    | 0.03 | 0.65   | 0.03  | 463.07   | 0.26   | 0.14   | 0.08   | 0.13     | 6.98   | 0.55   | 8.9     | 0.07   | 17.74    | 0.22    | 0.15   | 0.2   | 1.45    | 0.59   | Shared |        |
| \$3_vf_35073  | 0    | 0    | 0.02 | 1.02   | 0.03  | 110.94   | 0.11   | 0.34   | 0.24   | 0.14     | 0.77   | 0.23   | 1.04    | 0.18   | 0.55     | 0.5     | 0.25   | 0.38  | 0.6     | 0.79   | ME     |        |
| \$3_vf_335361 | 0.04 | 0    | 0.73 | 0.04   | 0.19  | 263.89   | 0.09   | 0.3    | 0.19   | 0.39     | 0.11   | 0.64   | 0.31    | 0.16   | 0.41     | 0.37    | 0.11   | 0.37  | 0.11    | 0.37   | ME     |        |
| \$3_vf_18829  | 0.02 | 0    | 0.02 | 0.4    | 0.05  | 372.84   | 10.39  | 0.18   | 0.17   | 0.12     | 0.46   | 1.2    | 6.03    | 32.06  | 0.38     | 0.24    | 0.28   | 0.24  | 0.35    | 0.64   | ME     |        |
| \$3_vf_115304 | 0.37 | 0    | 1.18 | 2.05   | 1.37  | 12099.04 | 3647.6 | 1.55   | 1.72   | 12.79    | 3.71   | 18.38  | 2.8     | 2.07   | 14583.94 | 1.75    | 2.78   | 1.78  | 1.64    | 4.02   | Shared |        |
| \$3_vf_37338  | 0.15 | 0    | 3.76 | 0.36   | 0.46  | 154.92   | 0.1    | 0.42   | 0.3    | 0.49     | 0.54   | 0.38   | 0.46    | 0.39   | 1.2      | 0.26    | 0.73   | 0.33  | 0.57    | 0.79   | ME     |        |
| \$3_vf_96926  | 0    | 0    | 0.05 | 0.92   | 0.12  | 821.15   | 254.23 | 0.32   | 0.18   | 0.18     | 0.78   | 1.04   | 0.38    | 0.22   | 0.37     | 0.54    | 0.25   | 0.35  | 0.21    | 0.35   | ME     |        |
| \$3_vf_44405  | 0    | 0    | 0.02 | 0.54   | 0.05  | 167.94   | 0.19   | 0.23   | 0.39   | 1.22     | 31.27  | 0.38   | 0.24    | 3.3    | 5.03     | 1.96    | 6.35   | 1.55  | 1.82    | 0.39   | Shared |        |
| \$3_vf_39734  | 0.12 | 0    | 0.05 | 8.71   | 13.41 | 2005.64  | 11.08  | 1.74   | 0.61   | 4.23     | 6.71   | 7.11   | 2.03    | 0.31   | 105.01   | 9.7     | 10.15  | 0.28  | 2.73    | 1.76   | Shared |        |
| \$3_vf_87828  | 0    | 0    | 6.63 | 10.35  | 8.57  | 16345.14 | 0.03   | 9.13   | 9.31   | 9.73     | 118.17 | 0.13   | 9.31    | 1.4    | 2.07     | 7.03    | 1.07   | 0.47  | 0.35    | 0.63   | Shared |        |
| \$3_vf_84832  | 0    | 0    | 0.62 | 0.04   | 24.96 | 0.02     | 0.24   | 0.23   | 0.23   | 0.21     | 0.41   | 0.12   | 0.5     | 0.24   | 0.92     | 0.37    | 0.29   | 0.47  | 0.49    | 0.92   | ME     |        |
| \$3_vf_61860  | 0    | 0    | 0.09 | 1.07   | 0.33  | 930.09   | 1.07   | 6.31   | 0.42   | 0.49     | 1.73   | 1.51   | 3.58    | 0.98   | 1.56     | 1.82    | 16.13  | 2.92  | 1.06    | 1.5    | ME     |        |
| \$3_vf_100400 | 0    | 0    | 0.05 | 1.44   | 0.05  | 163.42   | 3.15   | 0.23   | 0.16   | 0.42     | 2.62   | 0.81   | 2.34    | 5.32   | 0.14     | 1.84    | 5.22   | 4.79  | ME      | ME     |        |        |
| \$3_vf_108959 | 0    | 0    | 0.04 | 1.76   | 0.17  | 324.47   | 0.14   | 0.35   | 0.26   | 0.28     | 0.86   | 0.53   | 1.33    | 0.6    | 2.26     | 0.66    | 0.56   | 0.5   | 2.7     | 1.27   | ME     |        |
| \$3_vf_109277 | 0    | 0    | 0    | 0.64   | 0     | 19.79    | 0.03   | 0.14   | 0.09   | 0.09     | 0.29   | 2.73   | 0.1     | 30.59  | 3.32     | 0.25    | 4.98   | 0.35  | 0.2     | 0.39   | 1.54   | Shared |
| \$3_vf_35525  | 0.01 | 0    | 0    | 0.55   | 0     | 26.8     | 0.27   | 0.14   | 0.06   | 0.08     | 0.3    | 0.11   | 0.1     | 0.05   | 0.15     | 0.22    | 0.09   | 0.13  | 0.15    | 0.24   | ME     |        |
| \$3_vf_34353  | 0    | 0    | 0.17 | 0.27   | 0.02  | 91.19    | 0.24   | 0.19   | 0.05   | 0.06     | 1.56   | 0.18   | 0.15    | 0.19   | 0.15     | 0.19    | 0.13   | 0.13  | 0.13    | 0.54   | ME     |        |
| \$3_vf_54498  | 0.05 | 0    | 0    | 0.37   | 0.02  | 1.36     | 0.07   | 0.37   | 0.2    | 0.23     | 0.35   | 0.13   | 0.72    | 0.11   | 0.29     | 0.22    | 0.25   | 0.15  | 0.31    | 0.6    | ME     |        |
| \$3_vf_101591 | 0    | 0    | 0.22 | 0.02   | 20.46 | 4.26     | 0.3    | 0.36   | 0.15   | 0.78     | 0.11   | 0.69   | 0.11    | 0.21   | 0.38     | 0.42    | 0.55   | 0.33  | 1       | ME     |        |        |
| \$3_vf_101611 | 0    | 0    | 0.54 | 0.05   | 59.39 | 0.06     | 0.15   | 0.19   | 0.15   | 0.19     | 0.54   | 0.27   | 0.15    | 0.19   | 0.14     | 0.26    | 0.15   | 0.15  | 0.15    | 0.76   | Shared |        |
| \$3_vf_7137   | 0    | 0    | 0    | 6.82   | 10.11 | 14.73    | 0.02   | 9.43   | 8.14   | 70748.48 | 20.55  | 0.04   | 0.27    | 0.08   | 85.33    | 6.52    | 0.11   | 0.17  | 0.14    | 0.4    | Shared |        |
| \$3_vf_22968  | 0    | 0    | 0    | 1.01   | 0     | 62.02    | 0.21   | 0.27   | 0.18   | 1        | 0.7    | 0.15   | 0.05    | 0.31   | 0.74     | 0.48    | 0.65   | 0.31  | 0.84    | 1.86   | ME     |        |
| \$3_vf_12042  | 0.27 | 0    | 0.04 | 0.32   | 3.3   | 241.41   | 121.03 | 12.11  | 3.17   | 3.25     | 16.01  | 6.5    | 1.52    | 1.24   | 1.57     | 0.66    | 573.85 | 0.71  | 4.39    | 206.65 | Shared |        |
| \$3_vf_10746  | 0.01 | 0    | 0.02 | 0.99   | 0.03  | 106.36   | 0.56   | 0.23   | 0.1    | 0.09     | 0.54   | 0.24   | 0.29    | 0.43   | 0.42     | 0.29    | 0.43   | 0.23  | 0.75    | 0.74   | Shared |        |
| \$3_vf_127168 | 0    | 0    | 0.02 | 0.31   | 0.19  | 787.16   | 0.02   | 406.81 | 585.49 | 0.3      | 60.8   | 0.91   | 0.74    | 1.11   | 0.31     | 0.47    | 0.29   | 0.62  |         |        |        |        |

|               |      |      |      |       |       |         |        |         |         |       |       |       |        |       |       |       |         |       |        |        |        |        |
|---------------|------|------|------|-------|-------|---------|--------|---------|---------|-------|-------|-------|--------|-------|-------|-------|---------|-------|--------|--------|--------|--------|
| \$3_v0_51005  | 0.01 | 0    | 0    | 1.07  | 0     | 65.28   | 0.01   | 0.08    | 0.15    | 0.06  | 0.08  | 0.05  | 0.05   | 0.01  | 0.48  | 0.47  | 0.03    | 0     | 2.37   | 1.12   | ME     |        |
| \$3_v0_51931  | 0    | 0    | 0    | 0.5   | 0.11  | 19.85   | 0      | 0.23    | 0.01    | 0.34  | 0.1   | 0.26  | 0.08   | 0.02  | 0.08  | 0.15  | 2.6     | 0.04  | 0.1    | 0.06   | ME     |        |
| \$3_v0_522706 | 0    | 0    | 0.01 | 6.91  | 0.09  | 64.11   | 0.08   | 0.23    | 0.08    | 0.19  | 0.32  | 0.16  | 0.43   | 0.6   | 1.52  | 0.45  | 0.36    | 0.27  | 1.11   | 1.34   | ME     |        |
| \$3_v0_52973  | 0    | 0    | 0    | 1.44  | 0.03  | 27.16   | 0.08   | 0.44    | 0.48    | 0.17  | 1.32  | 0.17  | 0.57   | 1.4   | 0.42  | 0.64  | 0.34    | 0.64  | 0.45   | 1.1    | ME     |        |
| \$3_v0_52985  | 0.01 | 0    | 0    | 1.55  | 0.02  | 17.97   | 1.3    | 4.61    | 0.17    | 1.13  | 2.1   | 0.12  | 0.1    | 6.11  | 1.09  | 0.38  | 1.12    | 0.68  | 0.19   | 0.5    | ME     |        |
| \$3_v0_538858 | 0.01 | 0    | 0    | 1.7   | 0.06  | 1.7     | 0.07   | 0.3     | 0.16    | 0.19  | 0.49  | 0.37  | 0.1    | 0.36  | 0.49  | 0.21  | 0.37    | 0.24  | 0.97   | 0.24   | ME     |        |
| \$3_v0_77156  | 0    | 0    | 0.05 | 0.82  | 0.01  | 19.98   | 0.03   | 0.15    | 0.32    | 0.13  | 0.29  | 0.12  | 0.57   | 0.07  | 0.42  | 0.04  | 0.38    | 0.34  | 1.66   | 0.51   | ME     |        |
| \$3_v0_123834 | 0.01 | 0    | 0.02 | 11.31 | 0.02  | 44.86   | 0.02   | 0.16    | 0.09    | 0.09  | 1.14  | 0.09  | 0.15   | 0.11  | 0.24  | 0.45  | 0.11    | 0.15  | 11.21  | 1.89   | Shared |        |
| \$3_v0_53115  | 0    | 0    | 0    | 1.18  | 0.75  | 1.87    | 10.91  | 1.87    | 10.91   | 2.89  | 8.33  | 19.52 | 1.17   | 2.89  | 8.33  | 19.52 | 1.17    | 2.89  | 8.33   | 19.52  | 1.17   | Shared |
| \$3_v0_68031  | 0.01 | 0    | 0.02 | 2.82  | 0.14  | 127.71  | 4.81   | 123.54  | 1.48    | 58.46 | 1.31  | 4.06  | 1.83   | 2.97  | 2.08  | 4.24  | 0.29    | 5.2   | 7.04   | 16.1   | ME     |        |
| \$3_v0_29077  | 0    | 0    | 0    | 1.05  | 0.02  | 42.81   | 0.22   | 0.29    | 0.22    | 0.5   | 0.51  | 0.19  | 1.29   | 0.49  | 0.4   | 0.41  | 0.38    | 0.28  | 0.34   | 0.84   | ME     |        |
| \$3_v0_45147  | 0.06 | 0    | 0.05 | 0.54  | 0.19  | 564.44  | 0.1    | 0.27    | 0.18    | 0.15  | 0.5   | 4.73  | 0.41   | 0.75  | 0.29  | 0.62  | 0.41    | 5.83  | 0.47   | 0.7    | ME     |        |
| \$3_v0_524410 | 0    | 0    | 0    | 0.78  | 0.05  | 0.78    | 0.05   | 0.37    | 0.18    | 0.18  | 0.48  | 0.16  | 0.37   | 0.18  | 0.45  | 0.9   | 0.16    | 4.72  | 0.65   | 0.81   | ME     |        |
| \$3_v0_100785 | 0    | 0    | 0    | 0.83  | 0.11  | 52.51   | 0.11   | 1.83    | 0.19    | 0.18  | 0.84  | 0.27  | 0.51   | 1.83  | 0.39  | 0.22  | 0.38    | 25.16 | 0.43   | 0.92   | Shared |        |
| \$3_v0_15450  | 0.01 | 0    | 0    | 0.62  | 0.02  | 39.93   | 0.08   | 0.3     | 0.08    | 0.14  | 4.53  | 0.12  | 0.27   | 0.23  | 0.41  | 0.55  | 0.52    | 0.16  | 0.25   | 0.52   | ME     |        |
| \$3_v0_54303  | 0.02 | 0    | 0.02 | 0.79  | 2.06  | 45.85   | 1.21   | 14.89   | 0.19    | 2.67  | 2.18  | 0.14  | 1.12   | 34.19 | 2.67  | 2.8   | 0.74    | 0.35  | 0.79   | 0.39   | Shared |        |
| \$3_v0_30318  | 0    | 0    | 0.01 | 0.86  | 0.03  | 23.8    | 0.14   | 0.33    | 0.18    | 0.2   | 0.64  | 0.11  | 1.14   | 0.49  | 0.5   | 0.47  | 0.48    | 0.36  | 0.52   | 1.16   | ME     |        |
| \$3_v0_94577  | 0.01 | 0    | 0.03 | 1.13  | 0.13  | 202.06  | 0.81   | 0.57    | 0.72    | 0.38  | 1.8   | 0.37  | 3.49   | 0.5   | 2.89  | 0.93  | 0.65    | 1.35  | 1.52   | 16.91  | ME     |        |
| \$3_v0_5604   | 0    | 0    | 0.01 | 3.2   | 0.45  | 58.42   | 0.61   | 0.95    | 1       | 1.47  | 15.84 | 0.63  | 2.86   | 1.27  | 9.48  | 0.55  | 1.36    | 3.18  | 6.96   | 11.03  | Shared |        |
| \$3_v0_70093  | 0.01 | 0    | 0    | 5.76  | 0.07  | 18.2    | 0.44   | 0.2     | 0.2     | 91.85 | 0.65  | 0.79  | 1.15   | 5.87  | 0.53  | 1.48  | 0.91    | 5.34  | 0.73   | ME     |        |        |
| \$3_v0_70508  | 0.02 | 0    | 0    | 34.8  | 26.74 | 51.55   | 0.27   | 26.23   | 9.87    | 53.89 | 203.4 | 1.51  | 5.93   | 2.99  | 7.35  | 10.54 | 18.13   | 6.37  | 9      | 35.79  | Shared |        |
| \$3_v0_39774  | 0.02 | 0.01 | 0.01 | 7.75  | 1.11  | 53.34   | 0.12   | 55.08   | 2.38    | 8.51  | 17.42 | 0.36  | 259.82 | 8     | 62.67 | 42.86 | 85.59   | 211.1 | 112.13 | 13.66  | Shared |        |
| \$3_v0_59574  | 0    | 0    | 0.03 | 0.45  | 0.03  | 18.52   | 0.07   | 0.42    | 0.13    | 0.15  | 1.36  | 0.11  | 1.39   | 0.71  | 0.34  | 0.27  | 0.27    | 0.28  | 0.36   | 0.66   | ME     |        |
| \$3_v0_23194  | 0.01 | 0    | 0    | 1.44  | 0.07  | 48.79   | 1.49   | 0.55    | 0.17    | 0.25  | 1.04  | 1.78  | 1.16   | 0.48  | 0.49  | 0.76  | 22.69   | 0.38  | 0.81   | 3.1    | ME     |        |
| \$3_v0_127387 | 0    | 0    | 0    | 0.87  | 0.38  | 63.38   | 0.48   | 0.51    | 0.28    | 1.19  | 0.9   | 0.22  | 1.73   | 19.43 | 0.95  | 1.42  | 0.66    | 0.58  | 1.14   | 1.29   | ME     |        |
| \$3_v0_37728  | 0.02 | 0    | 0.02 | 4.26  | 0.09  | 72.84   | 13.48  | 2.75    | 4.09    | 7.92  | 3.56  | 1.54  | 1.3    | 1.27  | 3.5   | 1.65  | 34.9    | 1.92  | 5.67   | 13.1   | Shared |        |
| \$3_v0_40939  | 0    | 0.01 | 0.01 | 2.41  | 0.82  | 10.61   | 0.2    | 10.82   | 5.95    | 8.18  | 1.12  | 0.31  | 3.09   | 2.07  | 2.02  | 1.46  | 2.2     | 4.6   | 7.75   | 15.52  | ME     |        |
| \$3_v0_117894 | 0    | 0    | 0.01 | 2.22  | 0.41  | 44.48   | 0.81   | 0.97    | 1.3     | 8.12  | 14.12 | 3.33  | 5.16   | 1.2   | 6.63  | 0.88  | 7.08    | 1.39  | 3.6    | 7.53   | Shared |        |
| \$3_v0_18461  | 0    | 0    | 0    | 0.6   | 0.04  | 0.42    | 0.28   | 12.44   | 0.48    | 0.18  | 0.63  | 0.1   | 13.67  | 0.43  | 7.91  | 0.17  | 0.62    | 0.19  | 0.28   | 0.53   | Shared |        |
| \$3_v0_5506   | 0    | 0    | 0    | 0.64  | 0.01  | 4.79    | 0.7    | 0.39    | 0.25    | 0.21  | 0.1   | 1.08  | 0.51   | 0.91  | 0.21  | 1.08  | 0.51    | 0.91  | 0.21   | 1.08   | 0.51   | Shared |
| \$3_vf_122568 | 0.01 | 0    | 0    | 3.29  | 0.36  | 4.87    | 2.77   | 799.91  | 0.39    | 0.35  | 23.35 | 2.33  | 1.58   | 0.36  | 16.29 | 1.78  | 20.3    | 2.47  | 0.88   | 2.92   | Shared |        |
| \$3_v0_134040 | 0.02 | 0.01 | 0    | 9.52  | 0.31  | 58.41   | 6.08   | 73.16   | 3.28    | 26.43 | 22.97 | 3.32  | 12.65  | 8.22  | 19.21 | 9     | 8.7     | 9.59  | 11.66  | 27.02  | Shared |        |
| \$3_vf_133030 | 0    | 0    | 0    | 4.28  | 0.28  | 0.21    | 0.33   | 40.86   | 0.33    | 0.43  | 1.63  | 0.36  | 0.67   | 1.32  | 0.96  | 0.7   | 2.33    | 0.97  | 0.8    | 2.67   | ME     |        |
| \$3_vf_67622  | 0    | 0    | 0    | 0.5   | 0.08  | 0.74    | 0.14   | 66.98   | 128.64  | 0.44  | 23.84 | 0.1   | 1.13   | 0.56  | 1.87  | 0.5   | 0.43    | 0.33  | 0.48   | 0.91   | Shared |        |
| \$3_v0_110171 | 0    | 0    | 0    | 0.57  | 0.03  | 0.33    | 0.37   | 21.83   | 0.09    | 0.42  | 0.84  | 0.06  | 4.38   | 0.18  | 4.92  | 1.04  | 1.76    | 0.25  | 0.51   | 0.45   | ME     |        |
| \$3_v0_55415  | 0    | 0    | 0    | 0.76  | 0.39  | 2.29    | 0.6    | 1420.76 | 1514.05 | 0.83  | 8.83  | 0.07  | 2.58   | 2.23  | 0.73  | 0.59  | 0.31    | 0.3   | 0.38   | 0.85   | Shared |        |
| \$3_vf_38011  | 0.01 | 0    | 0    | 3.22  | 0.08  | 0.26    | 0.01   | 287.06  | 251.71  | 0.81  | 2.98  | 0.04  | 0.72   | 0.82  | 0.81  | 1.38  | 0.13    | 1.03  | 1.88   | 1.03   | Shared |        |
| \$3_v0_55687  | 0    | 0    | 0.11 | 0.44  | 0.26  | 1016.37 | 0.05   | 348.36  | 17.73   | 246.4 | 10.05 | 1.34  | 0.72   | 0.72  | 0.63  | 0.3   | 1.99    | 0.29  | 0.32   | 12.3   | Shared |        |
| \$3_v0_52423  | 0.37 | 0    | 0    | 0.37  | 4.78  | 180.73  | 242.15 | 295.25  | 8.83    | 18.34 | 48.76 | 43.97 | 2.87   | 2.88  | 2.23  | 1.13  | 6860.37 | 0.93  | 16.58  | 951.76 | Shared |        |
| \$3_vf_133990 | 0    | 0    | 0.63 | 0.29  | 0.33  | 0.06    | 0.63   | 0.29    | 0.33    | 0.06  | 0.63  | 0.29  | 0.33   | 0.06  | 0.63  | 0.29  | 0.33    | 0.06  | 0.63   | 0.29   | Shared |        |
| \$3_vf_105728 | 0    | 0    | 0    | 0.63  | 0.03  | 0.33    | 0.06   | 13.73   | 0.44    | 0.39  | 1.57  | 0.21  | 0.48   | 65.11 | 0.36  | 0.19  | 4.26    | 0.22  | 0.28   | 0.52   | ME     |        |
| \$3_vf_8808   | 0    | 0    | 0    | 0.18  | 0.02  | 0.36    | 0.14   | 14.19   | 0.19    | 0.16  | 0.47  | 0.08  | 0.3    | 0.66  | 0.46  | 0.31  | 4.2     | 0.18  | 0.3    | 0.7    | ME     |        |
| \$3_vf_8905   | 0    | 0    | 0    | 3.86  | 1.86  | 1.41    | 0.57   | 51.26   | 0.88    | 3.45  | 4.5   | 38.56 | 4.02   | 0.88  | 6.35  | 0.65  | 4.46    | 4.38  | 2.54   | ME     |        |        |
| \$3_vf_74661  | 0.02 | 0    | 0    | 0.45  | 0.04  | 0.01    | 0.02   | 108.37  | 0.08    | 0.11  | 5.54  | 4.51  | 0.37   | 0.13  | 0.67  | 0.17  | 0.17    | 0.2   | 0.23   | 0.5    | ME     |        |
| \$3_vf_136076 | 0    | 0    | 0    | 0.65  | 0.03  | 0.48    | 2.4    | 19.19   | 36.18   | 0.24  | 1.74  | 0.1   | 1.32   | 0.87  | 0.36  | 0.29  | 0.49    | 0.31  | 0.33   | 0.48   | Shared |        |
| \$3_v0_21869  | 0    | 0    | 0    | 14.42 | 7.58  | 0.73    | 0.23   | 63.83   | 102.34  | 2.93  | 2.21  | 0.53  | 1.13   | 82.02 | 70.77 | 4.04  | 2.8     | 2.04  | 2.04   | 0.74   | Shared |        |
| \$3_vf_6032   | 0    | 0    | 0    | 0.12  | 0.02  | 0.01    | 0.01   | 64.45   | 1.92    | 0.08  | 0.03  | 0.19  | 0.43   | 0.03  | 0.19  | 0.43  | 0.03    | 0.19  | 0.43   | 0.03   | Shared |        |
| \$3_vf_137260 | 0    | 0    | 0    | 0.51  | 0.04  | 0.25    | 0.01   | 49.37   | 52.39   | 0.09  | 0.27  | 0.04  | 0.21   | 0.15  | 0.24  | 0.32  | 0.12    | 0.16  | 0.27   | 0.34   | Shared |        |
| \$3_v0_11450  | 0.01 | 0    | 0    | 0.47  | 0.19  | 0.29    | 0.02   | 83.61   | 0.09    | 0.23  | 0.49  | 0.06  | 0.37   | 0.15  | 0.66  | 0.2   | 0.15    | 0.13  | 0.44   | 0.41   | ME     |        |
| \$3_vf_280671 | 0    | 0    | 0    | 0.52  | 0.07  | 0.35    | 0.01   | 370.71  | 0.23    | 0.55  | 0.16  | 0.33  | 0.25   | 0.75  | 1.32  | 0.55  | ME      | 1     | 0.63   | 10.64  | ME     |        |
| \$3_vf_77701  | 0    | 0    | 0    | 0.46  | 0.01  | 0.6     | 0.01   | 29.26   | 0.12    | 0.06  | 0.26  | 0.02  | 0.3    | 0.21  | 0.28  | 0.19  | 0.19    | 0.23  | 0.18   | 0.45   | ME     |        |
| \$3_vf_145579 | 0    | 0    | 0    | 0.85  | 0.32  | 1.2     | 0.18   | 547.38  | 1778.42 | 0.54  | 1.28  | 0.09  | 1.75   | 2.75  | 1.99  | 0.62  | 0.4     | 0.36  | 0.46   | 0.86   | Shared |        |
| \$3_vf_145583 | 0    | 0    | 0    | 0.55  | 0.04  | 0.81    | 0.46   | 198.81  | 0.18    | 0.24  | 0.61  | 0.12  | 1.79   | 0.28  | 0.63  | 0.56  | 2.08    | 0.38  | 0.8    | 1.06   | ME     |        |
| \$3_vf_29331  | 0.02 | 0    | 0    | 0.94  | 0.04  | 0.07    | 0.04   | 40.01   | 0.12    | 0.08  | 0.18  | 0.06  | 0.36   | 0.08  | 0.36  | 0.11  | 0.27    | 0.36  | 0.32   | 0.42   | ME     |        |
| \$3_vf_145585 | 0    | 0    | 0    | 0.46  | 0.02  | 0.38    | 0.09   | 44.5    | 96.5    | 0.14  | 0.37  | 0.08  | 0.53   | 0.36  | 0.23  | 0.25  | 0.27    | 0.28  | 0.65   | Shared |        |        |
| \$3_vf_145586 | 0    | 0    | 0    | 0.58  | 0.08  | 0.34    | 0.08   | 114.11  | 0.18    | 0.12  | 0.41  | 0.29  | 0.85   | 0.24  | 0.67  | 0.23  | 3.34    | 0.22  | 0.29   | 0.48   | ME     |        |
| \$3_vf_145588 | 0    | 0    | 0    | 1.55  | 0.28  | 0.15    | 0.01   | 1139.5  | 1002.38 | 0.28  | 1.19  | 0.59  | 1.29   | 1.89  | 0.66  | 0.79  | 1.12    | 0.61  | 1.21   | Shared |        |        |
| \$3_vf_145604 | 0    | 0    | 0    | 1.42  | 0.08  | 1.07    | 14.96  | 534.39  | 0.25    | 0.27  | 0.87  | 0.08  | 1.31   | 0.88  | 0.62  | 0.39  | 27.22   | 2.28  | 8.02   | 16.6   | Shared |        |
| \$3_vf_103206 | 0    | 0    | 0    | 3.84  | 0.09  | 3.51    | 0.58   | 45.06   | 0.61    | 0.45  | 12.03 | 2.1   | 2.36   | 32.08 | 7.76  | 6.71  | 20.63   | 1.21  | 3.58   | 4.39   | Shared |        |
| \$3_vf_60597  | 0    | 0    | 0    | 4.87  | 0.05  | 1.85    | 0.05   | 32.45   | 57.881  | 0.18  | 5.85  | 1.37  | 0.72   | 0.44  | 0.62  | 1.57  | 0.36    | 0.32  | 1.9    | 25.36  | Shared |        |
| \$3_v0_36605  | 0    | 0    | 0    | 0.67  | 0.08  | 0.17    | 1.18   | 0.28    | 0.61    | 1     | 0.5   | 0.09  | 0.7    | 0.09  | 0.17  | 0.16  | 0.74    | 0.14  | 0.35   | 0.48   | ME     |        |
| \$3_v0_122344 | 0.02 | 0    | 0    | 0.62  | 0.91  | 47.06   | 0.06   | 166.98  | 0.86    | 0.21  | 1.68  | 0.22  | 0.69   | 0.54  | 0.41  | 0.62  | 24.45   | 0.29  | 0.77   | 1.1    | ME     |        |
| \$3_v0_12     |      |      |      |       |       |         |        |         |         |       |       |       |        |       |       |       |         |       |        |        |        |        |



|                |      |      |      |       |       |       |        |        |         |        |        |      |       |       |       |       |        |       |       |       |        |    |
|----------------|------|------|------|-------|-------|-------|--------|--------|---------|--------|--------|------|-------|-------|-------|-------|--------|-------|-------|-------|--------|----|
| \$5_vt_118168  | 0    | 0    | 0    | 0.63  | 0.03  | 0.27  | 0.13   | 52.6   | 0.18    | 0.32   | 0.33   | 0.68 | 0.36  | 0.58  | 0.22  | 0.37  | 4.91   | 0.16  | 0.25  | 0.34  | ME     |    |
| \$5_vt_12285   | 0    | 0    | 0    | 0.46  | 0.17  | 0.95  | 0.1    | 93.15  | 0.1     | 0.2    | 0.49   | 0.06 | 0.36  | 0.2   | 0.6   | 0.2   | 3.64   | 0.2   | 0.36  | 0.7   | ME     |    |
| \$5_vt_12676   | 0    | 0    | 0    | 1.16  | 0.03  | 0.19  | 0.12   | 106.91 | 0.18    | 0.14   | 0.51   | 0.07 | 0.38  | 0.52  | 0.2   | 0.7   | 13.34  | 0.13  | 0.49  | 0.87  | ME     |    |
| \$5_vt_156083  | 0    | 0    | 0    | 26.84 | 0.04  | 18.79 | 0.2    | 20.92  | 4.44    | 0.18   | 271.66 | 0.17 | 14.75 | 4.69  | 10.92 | 11.39 | 1.34   | 27.92 | 16.96 | 0.76  | Shared |    |
| \$5_vt_20500   | 0.01 | 0    | 0    | 5.43  | 0.34  | 4.72  | 126.01 | 41.21  | 9.15    | 4.59   | 13.31  | 0.86 | 1.43  | 7.29  | 6.39  | 1.71  | 3.81   | 7.16  | 10.95 | 3.92  | Shared |    |
| \$5_vt_163183  | 0    | 0    | 0    | 6.23  | 0.13  | 0.03  | 21.34  | 0.11   | 0.13    | 0.12   | 1.87   | 0.53 | 0.69  | 0.28  | 0.53  | 4.87  | 0.12   | 1.12  | 1.74  | 1.61  | Shared |    |
| \$5_vt_1416121 | 0    | 0    | 0    | 6.22  | 0.06  | 0.52  | 0.32   | 57.99  | 2.21    | 0.18   | 3.31   | 1.74 | 1.26  | 0.68  | 0.8   | 2.15  | 4.1    | 0.33  | 1.45  | 4.16  | ME     |    |
| \$5_vt_169083  | 0.01 | 0    | 0    | 1.14  | 0.08  | 0.26  | 0.09   | 42.48  | 0.38    | 0.13   | 0.76   | 0.06 | 0.91  | 0.14  | 0.74  | 0.31  | 5.64   | 0.28  | 0.48  | 0.74  | ME     |    |
| \$5_vt_154146  | 0    | 0    | 0    | 0.64  | 0.02  | 0.65  | 0.07   | 37.61  | 0.09    | 0.65   | 1.22   | 0.4  | 0.27  | 0.36  | 0.43  | 0.27  | 2.92   | 0.36  | 0.24  | 0.74  | ME     |    |
| \$5_vt_18847   | 0    | 0    | 0    | 0.99  | 0.03  | 0.69  | 0.05   | 28.62  | 0.25    | 2.75   | 1.32   | 1.42 | 0.81  | 1.56  | 1.15  | 0.89  | 0.43   | 0.25  | 1.44  | 0.78  | ME     |    |
| \$5_vt_93839   | 0    | 0    | 0.01 | 0.51  | 0.04  | 6.9   | 0.07   | 16.49  | 5.9     | 0.38   | 2.12   | 1.44 | 1.1   | 3.23  | 0.7   | 0.58  | 2.54   | 0.26  | 37.58 | 12.38 | Shared |    |
| \$5_vt_13501   | 0.01 | 0    | 0    | 0.7   | 0.11  | 1.24  | 0.05   | 68.65  | 0.78    | 2.06   | 1.58   | 0.28 | 1.5   | 1     | 0.78  | 1.99  | 89.76  | 0.25  | 0.51  | 0.97  | ME     |    |
| \$5_vt_129970  | 0.02 | 0    | 0    | 13.63 | 13.49 | 0.19  | 23.34  | 1.08   | 2.14    | 1.08   | 97.37  | 0.17 | 2.26  | 0.91  | 1.04  | 4.97  | 5.17   | 1.15  | 2.29  | 5.02  | Shared |    |
| \$5_vt_124677  | 0    | 0    | 0.02 | 4.58  | 0.27  | 60.23 | 8.73   | 91.22  | 6.62    | 33.18  | 9.49   | 2.01 | 7.57  | 1.53  | 5.56  | 3.38  | 6.76   | 7.06  | 8.53  | 30.86 | ME     |    |
| \$5_vt_130032  | 2.16 | 0.29 | 0    | 0.51  | 0.01  | 0.24  | 0.46   | 16.84  | 0.1     | 0.11   | 0.25   | 0.42 | 0.27  | 0.28  | 0.26  | 0.19  | 0.27   | 0.3   | 0.21  | 0.63  | ME     |    |
| \$5_vt_130234  | 0.01 | 0    | 0    | 6.75  | 0.27  | 72.49 | 8.87   | 88.77  | 2.76    | 15.16  | 14.21  | 3.04 | 8.4   | 3.9   | 6.09  | 4.42  | 7.97   | 26.16 | 10.16 | 34.56 | Shared |    |
| \$5_vt_80496   | 0.01 | 0.01 | 0    | 38.3  | 3.67  | 30.75 | 1.12   | 77.36  | 38.2    | 12.96  | 9.61   | 4.05 | 37.1  | 5.32  | 9.86  | 7.02  | 40.47  | 24.13 | 24.5  | 42.04 | Shared |    |
| \$5_vt_142195  | 0    | 0    | 0    | 6.52  | 0.17  | 13.28 | 0.75   | 17.27  | 11.16   | 4.07   | 19.64  | 0.42 | 1.48  | 6.65  | 16.63 | 1.42  | 1.32   | 33.83 | 5.63  | 3.45  | Shared |    |
| \$5_vt_180498  | 0    | 0    | 0    | 0.61  | 0.01  | 0.48  | 0.05   | 175.7  | 0.36    | 0.66   | 1.88   | 0.09 | 0.62  | 1.88  | 0.51  | 0.19  | 4.61   | 0.93  | 0.38  | 0.66  | ME     |    |
| \$5_vt_138476  | 0    | 0    | 0    | 1.12  | 0.04  | 0.31  | 0.05   | 9.93   | 0.18    | 0.46   | 0.29   | 0.08 | 0.42  | 0.45  | 0.34  | 0.32  | 0.98   | 0.35  | 0.72  | 3.52  | ME     |    |
| \$5_vt_107105  | 0    | 0    | 0    | 0.42  | 0.01  | 0.18  | 0.12   | 14.69  | 0.85    | 0.21   | 0.56   | 0.06 | 0.22  | 0.27  | 0.35  | 0.17  | 2.21   | 0.18  | 0.12  | 0.43  | ME     |    |
| \$5_vt_142450  | 0    | 0    | 0    | 0.36  | 0.64  | 1.23  | 0.1    | 572.97 | 2672.03 | 6.18   | 1.17   | 0.04 | 1.19  | 5.13  | 0.24  | 0.57  | 0.19   | 0.15  | 0.64  | 0.73  | Shared |    |
| \$5_vt_122452  | 0    | 0    | 0    | 1.65  | 0.98  | 1.75  | 0.12   | 26.44  | 0.14    | 0.51   | 0.42   | 0.1  | 0.3   | 0.11  | 1.39  | 0.49  | 15.54  | 0.22  | 0.52  | 0.46  | ME     |    |
| \$5_vt_63924   | 0.02 | 0.01 | 0    | 0.53  | 0.04  | 9.97  | 0.74   | 31.91  | 13.61   | 0.1    | 1.88   | 1.68 | 0.27  | 0.07  | 0.31  | 0.4   | 29.72  | 0.19  | 0.29  | 0.56  | Shared |    |
| \$5_vt_130958  | 0    | 0    | 0    | 0.57  | 0.02  | 0.2   | 0.05   | 13.55  | 0.08    | 0.13   | 0.5    | 3.39 | 0.29  | 0.46  | 0.22  | 0.27  | 5.98   | 0.41  | 0.24  | 0.79  | ME     |    |
| \$5_vt_13747   | 0.02 | 0.01 | 0    | 30.99 | 0.13  | 0.63  | 0.03   | 270.98 | 446.34  | 0.37   | 2.05   | 0.07 | 0.88  | 7.59  | 0.69  | 20.88 | 0.33   | 0.41  | 0.42  | 0.81  | Shared |    |
| \$5_vt_14737   | 0.03 | 0    | 0    | 0.92  | 0.01  | 0.25  | 0.06   | 37.29  | 0.14    | 0.34   | 1.3    | 0.71 | 0.35  | 2.81  | 0.74  | 0.55  | 3.33   | 0.51  | 0.45  | 0.51  | ME     |    |
| \$5_vt_80911   | 0    | 0    | 0    | 0.67  | 0.11  | 1.96  | 1.59   | 96.76  | 0.15    | 2.07   | 0.61   | 0.15 | 1.6   | 1.69  | 0.84  | 0.56  | 9.21   | 0.76  | 0.83  | 0.9   | ME     |    |
| \$5_vt_169980  | 0.01 | 0    | 0    | 0.88  | 0.08  | 2.2   | 0.89   | 1.89   | 1.85    | 7.15   | 1.96   | 0.16 | 0.54  | 0.95  | 0.31  | 0.52  | 13.77  | 0.38  | 0.88  | 2.8   | ME     |    |
| \$5_vt_117719  | 0    | 0    | 0    | 0.57  | 0.03  | 0.54  | 0.06   | 22.24  | 0.15    | 0.29   | 0.19   | 0.16 | 0.15  | 0.46  | 0.16  | 0.41  | 0.92   | 0.38  | 0.41  | 0.98  | ME     |    |
| \$5_vt_113386  | 0.02 | 0    | 0    | 0.86  | 0.05  | 0.39  | 0.26   | 10.7   | 0.15    | 0.14   | 0.64   | 0.26 | 0.58  | 0.29  | 2.65  | 0.21  | 0.27   | 0.27  | 0.43  | 0.73  | ME     |    |
| \$5_vt_95307   | 0    | 0    | 0    | 0.48  | 0.03  | 0.45  | 0.06   | 23.67  | 0.22    | 0.63   | 0.4    | 1.21 | 1.45  | 2.07  | 0.4   | 0.38  | 8.45   | 0.21  | 0.47  | 1.2   | ME     |    |
| \$5_vt_115113  | 0.01 | 0.01 | 0    | 16.34 | 4.27  | 34.54 | 0.08   | 64.14  | 13.88   | 15.26  | 3.84   | 6.87 | 23.86 | 6.47  | 18.96 | 4.99  | 38.64  | 18.57 | 76.23 | 28.86 | Shared |    |
| \$5_vt_46394   | 0.01 | 0    | 0.01 | 1.53  | 0.08  | 1.9   | 0.26   | 18.54  | 0.44    | 5.02   | 2.79   | 0.48 | 1.15  | 1.11  | 1.12  | 2.31  | 14     | 0.81  | 1     | 1.73  | ME     |    |
| \$5_vt_89540   | 0    | 0    | 0    | 0.68  | 0.04  | 0.38  | 0.05   | 43.2   | 0.13    | 0.16   | 0.32   | 0.08 | 0.36  | 0.54  | 0.52  | 0.29  | 0.82   | 0.24  | 0.22  | 0.73  | ME     |    |
| \$5_vt_17520   | 0    | 0    | 0    | 0.58  | 0.01  | 0.56  | 0.06   | 17.71  | 0.14    | 0.58   | 0.6    | 0.79 | 0.49  | 0.32  | 0.24  | 0.17  | 1.84   | 0.26  | 0.27  | 0.89  | ME     |    |
| \$5_vt_137154  | 0.01 | 0    | 0    | 0.33  | 0.05  | 0.34  | 0.24   | 45.76  | 0.28    | 0.13   | 1.1    | 0.12 | 0.72  | 0.93  | 0.12  | 0.72  | 0.93   | 0.42  | 0.95  | 0.96  | ME     |    |
| \$5_vt_40848   | 0    | 0    | 0    | 4.04  | 1.03  | 10.62 | 0.86   | 50.08  | 4.08    | 23.77  | 9.33   | 4.27 | 4.09  | 12.35 | 1.85  | 2.22  | 8.31   | 0.49  | 6.12  | 1.62  | ME     |    |
| \$5_vt_18263   | 0    | 0    | 0    | 0.81  | 0.07  | 0.46  | 0.2    | 20.75  | 0.09    | 0.64   | 0.76   | 0.13 | 0.46  | 0.32  | 0.56  | 0.33  | 3.39   | 0.22  | 0.45  | 0.94  | ME     |    |
| \$5_vt_12532   | 0.01 | 0    | 0    | 16.38 | 1.45  | 12.38 | 0.12   | 14.59  | 4.12    | 5.89   | 4.12   | 1.82 | 6.14  | 1.58  | 1.73  | 2.89  | 1.4    | 0.28  | 4.57  | 1.62  | ME     |    |
| \$5_vt_41663   | 0    | 0    | 0    | 0.61  | 0.02  | 0.32  | 0.04   | 43.3   | 0.11    | 0.1    | 0.41   | 0.06 | 0.4   | 0.85  | 0.37  | 0.29  | 0.33   | 0.17  | 0.22  | 0.51  | ME     |    |
| \$5_vt_145026  | 0    | 0    | 0    | 0.71  | 1.23  | 0.34  | 0.08   | 58.63  | 0.08    | 0.14   | 0.46   | 0.06 | 0.39  | 0.17  | 0.16  | 0.23  | 5.78   | 0.16  | 0.25  | 0.44  | ME     |    |
| \$5_vt_17593   | 0.04 | 0.01 | 0.25 | 0.95  | 0.09  | 1.44  | 0.03   | 0.32   | 1.72    | 5.15   | 0.37   | 1.61 | 0.31  | 1.11  | 0.37  | 2.5   | 2.61   | 1.47  | 1.46  | 1.66  | ME     |    |
| \$5_vt_18746   | 0    | 0    | 0    | 0.41  | 0.02  | 0.4   | 0.16   | 11.51  | 0.05    | 0.25   | 0.33   | 0.19 | 0.62  | 0.35  | 0.68  | 0.23  | 0.31   | 0.62  | 0.24  | 0.84  | ME     |    |
| \$5_vt_58859   | 0.01 | 0    | 0    | 0.59  | 0.04  | 0.6   | 0.01   | 25.01  | 0.16    | 1.53   | 0.92   | 0.09 | 0.42  | 0.25  | 0.49  | 0.2   | 22.58  | 0.23  | 1.08  | 0.71  | ME     |    |
| \$5_vt_38886   | 0    | 0    | 0    | 0.7   | 0.05  | 0.48  | 0.08   | 46.53  | 0.47    | 10.53  | 9.14   | 0.23 | 2.43  | 3.22  | 0.4   | 1.17  | 11.57  | 0.54  | 9.36  | 9.16  | ME     |    |
| \$5_vt_138900  | 0.01 | 1.15 | 0.01 | 1.15  | 0.01  | 16.08 | 0.16   | 16.08  | 0.25    | 0.45   | 0.85   | 0.18 | 1.13  | 2.45  | 1.9   | 0.85  | 1.07   | 0.52  | 1.07  | 1.67  | ME     |    |
| \$5_vt_59798   | 0    | 0    | 0    | 4.15  | 0.09  | 0.56  | 0.09   | 114.49 | 0.15    | 0.68   | 0.81   | 0.24 | 1.1   | 0.47  | 0.53  | 0.35  | 127.16 | 0.28  | 0.45  | 1.27  | ME     |    |
| \$5_vt_84574   | 0.02 | 0    | 0    | 1.2   | 0.07  | 11.35 | 0.36   | 25.91  | 0.16    | 0.32   | 1      | 2.98 | 0.38  | 0.53  | 0.48  | 0.41  | 8.42   | 0.49  | 0.42  | 0.65  | ME     |    |
| \$5_vt_14946   | 0    | 0    | 0    | 3.08  | 0.09  | 0.12  | 0.03   | 60.91  | 0.42    | 0.13   | 0.93   | 0.95 | 0.48  | 0.31  | 0.31  | 37.08 | 0.79   | 0.57  | 1.16  | ME    |        |    |
| \$5_vt_139401  | 0    | 0    | 0    | 1.25  | 0.05  | 0.36  | 0.19   | 43.59  | 0.2     | 0.59   | 0.82   | 0.48 | 0.44  | 0.29  | 0.5   | 0.48  | 0.31   | 0.25  | 0.79  | 0.73  | ME     |    |
| \$5_vt_60507   | 0    | 0    | 0    | 0.43  | 0.03  | 0.46  | 0.06   | 19.6   | 0.13    | 0.28   | 0.54   | 0.07 | 0.41  | 0.37  | 0.41  | 0.34  | 2.55   | 0.25  | 0.4   | 0.98  | ME     |    |
| \$5_vt_1444    | 0    | 0    | 0    | 0.91  | 0.01  | 1.42  | 0.13   | 27.64  | 0.09    | 0.36   | 1.33   | 0.08 | 0.15  | 0.67  | 1.06  | 1.18  | 14.99  | 0.14  | 0.71  | 0.56  | ME     |    |
| \$5_vt_14159   | 0.01 | 0    | 0    | 3.57  | 0.1   | 1.64  | 0.07   | 33.91  | 0.48    | 0.54   | 0.6    | 0.57 | 0.48  | 0.13  | 2.76  | 0.64  | 2.9    | 0.16  | 0.6   | 1.53  | ME     |    |
| \$5_vt_165490  | 0    | 0    | 0    | 0.74  | 0.21  | 0.31  | 0.03   | 19.44  | 0.19    | 0.15   | 4.58   | 0.11 | 0.44  | 3.46  | 0.61  | 0.65  | 0.2    | 0.2   | 0.3   | 0.53  | ME     |    |
| \$5_vt_16500   | 0    | 0    | 0    | 1.14  | 0.19  | 5     | 0.09   | 93.72  | 21.82   | 1.17   | 2.97   | 0.5  | 4.47  | 2.85  | 8.08  | 1.05  | 9.65   | 4.51  | 3.84  | 6.25  | Shared |    |
| \$5_vt_15439   | 0.02 | 0.06 | 0    | 3.52  | 0.38  | 50.49 | 0.16   | 47.89  | 0.36    | 0.49   | 0.26   | 0.16 | 2.41  | 6.63  | 2.9   | 2.41  | 24.13  | 7.17  | 33.9  | 22.64 | Shared |    |
| \$5_vt_10001   | 0.06 | 0.01 | 0    | 28.98 | 7.19  | 18.91 | 77.67  | 2.68   | 0.72    | 138.52 | 14.64  | 2.44 | 63.57 | 8.59  | 7.78  | 27.93 | 112.64 | 31.79 | 52.14 | 61.77 | Shared |    |
| \$5_vt_15843   | 0    | 0    | 0    | 0.01  | 0.67  | 0     | 0.29   | 7.73   | 0.14    | 0.06   | 10.69  | 0.36 | 0.03  | 0.1   | 0.32  | 0.21  | 0.22   | 1.03  | 0.14  | 0.18  | 0.4    | ME |
| \$5_vt_18332   | 0.01 | 0    | 0    | 1.48  | 0.09  | 1.33  | 0.17   | 1.39   | 0.31    | 28.36  | 1.99   | 0.5  | 2.51  | 3.1   | 2.96  | 2.15  | 1.29   | 3.05  | 1.67  | 1.73  | ME     |    |
| \$5_vt_19384   | 0    | 0    | 0.02 | 0.52  | 0.14  | 0.42  | 192.04 | 0.07   | 0.54    | 0.48   | 198.06 | 0.89 | 0.31  | 0.75  | 0.33  | 0.33  | 0.22   | 0.19  | 0.52  | 0.19  | ME     |    |
| \$5_vt_11744   | 0    | 0    | 0    | 0.28  | 0.07  | 0.69  | 0.11   | 0.28   | 0.13    | 22.37  | 2.49   | 0.11 | 1.55  | 0.75  | 1.33  | 0.64  | 0.44   | 0.27  | 0.44  | 0.85  | ME     |    |

|              |      |      |      |       |      |       |       |        |        |         |       |       |        |       |      |      |        |       |              |              |
|--------------|------|------|------|-------|------|-------|-------|--------|--------|---------|-------|-------|--------|-------|------|------|--------|-------|--------------|--------------|
| 57_vt_134784 | 0    | 0    | 0    | 0.65  | 0.06 | 0.4   | 0.17  | 0.43   | 0.26   | 45.31   | 0.5   | 0.06  | 0.41   | 0.28  | 0.39 | 0.15 | 0.6    | 0.33  | 0.38         | 0.91 ME      |
| 57_vt_135322 | 0.01 | 0    | 0    | 1.79  | 0.02 | 5.57  | 0.18  | 0.25   | 0.11   | 58.32   | 1.1   | 0.31  | 3.58   | 0.13  | 0.77 | 0.57 | 0.16   | 0.68  | 42.35        | 0.84 Shared  |
| 57_vt_135679 | 0    | 0    | 0    | 1.49  | 0.02 | 0.68  | 0.19  | 0.43   | 0.2    | 36.7    | 1.5   | 0.52  | 1.07   | 0.13  | 0.73 | 0.25 | 0.32   | 0.64  | 0.66         | 0.94 ME      |
| 57_vt_135828 | 0    | 0    | 0    | 0.59  | 0.19 | 0.84  | 0.52  | 0.43   | 0.4    | 59.62   | 0.72  | 0.17  | 1.64   | 127.2 | 0.76 | 0.4  | 0.73   | 0.52  | 0.49         | 1.27 ME      |
| 57_vt_136164 | 0    | 0    | 0    | 0.87  | 0.02 | 0.25  | 0.05  | 0.44   | 0.1    | 18.85   | 0.57  | 0.1   | 0.22   | 0.52  | 0.43 | 0.24 | 0.43   | 0.25  | 0.3          | 0.56 ME      |
| 57_vt_137611 | 0    | 0    | 0    | 0.74  | 0.07 | 1.39  | 0.21  | 0.35   | 0.19   | 73.63   | 0.21  | 0.13  | 0.23   | 0.33  | 0.55 | 0.33 | 0.1    | 0.51  | 0.46         | 1.06 ME      |
| 57_vt_137915 | 0    | 0    | 0    | 0.98  | 0.09 | 0.75  | 0.14  | 0.35   | 0.22   | 444.06  | 11.57 | 0.29  | 0.92   | 0.28  | 1.16 | 0.51 | 0.46   | 0.45  | 0.68         | 1.01 Shared  |
| 57_vt_137998 | 0    | 0    | 0    | 4.9   | 0.08 | 1.07  | 0.22  | 0.43   | 0.19   | 295.05  | 0.93  | 0.15  | 0.78   | 0.59  | 2.29 | 1    | 0.49   | 0.86  | 28.92        | 14.8 Shared  |
| 57_vt_138096 | 0    | 0    | 0    | 4.21  | 0.07 | 0.68  | 0.19  | 0.43   | 0.2    | 315.05  | 0.87  | 0.25  | 0.76   | 0.65  | 1.25 | 0.28 | 0.35   | 0.25  | 0.45         | 1.54 ME      |
| 57_vt_138109 | 0    | 0    | 0    | 0.98  | 0.05 | 0.97  | 0.04  | 0.9    | 0.2    | 38.54   | 0.62  | 0.11  | 0.91   | 0.47  | 1.61 | 0.44 | 1.11   | 0.45  | 0.47         | 1.14 ME      |
| 57_vt_138116 | 0    | 0    | 0    | 0.41  | 0.04 | 0.54  | 0.02  | 0.22   | 0.15   | 37.91   | 0.33  | 0.1   | 0.75   | 0.67  | 0.59 | 0.29 | 0.65   | 0.37  | 0.36         | 1.87 ME      |
| 57_vt_138140 | 0    | 0    | 0    | 0.9   | 0.02 | 1.67  | 0.02  | 0.42   | 0.51   | 51.84   | 0.64  | 0.15  | 0.38   | 2.72  | 0.57 | 0.3  | 0.29   | 0.24  | 0.38         | 0.86 ME      |
| 57_vt_138173 | 0    | 0    | 0    | 0.46  | 0.02 | 12.01 | 0.38  | 0.1    | 1.19   | 61.17   | 0.18  | 0.08  | 6.23   | 0.17  | 0.23 | 0.08 | 0.23   | 0.14  | 71.23        | 13.86 Shared |
| 57_vt_944    | 0.01 | 0    | 0    | 0.73  | 0.02 | 0.34  | 0.05  | 0.17   | 0.12   | 12.64   | 0.87  | 0.08  | 0.68   | 0.2   | 0.3  | 0.25 | 0.31   | 0.44  | 0.36         | 5.48 ME      |
| 57_vt_4114   | 0    | 0    | 0    | 2.19  | 0.53 | 3.07  | 0.33  | 0.79   | 0.1    | 42.51   | 34.28 | 0.75  | 0.33   | 3.32  | 1.5  | 1.26 | 3.12   | 1.1   | 1.83         | 1.05 Shared  |
| 57_vt_6526   | 0.02 | 0    | 0    | 14.11 | 0    | 11.52 | 26.29 | 8.2    | 454.41 | 6.42    | 4.87  | 55.93 | 0.39   | 1.47  | 4.86 | 2.23 | 2.22   | 2.65  | 7.22 Shared  |              |
| 57_vt_11081  | 0.01 | 0.01 | 0.01 | 14.35 | 0.09 | 12.69 | 61.95 | 0.82   | 0.32   | 337.04  | 2.03  | 0.2   | 101.57 | 7.92  | 2.96 | 5.66 | 0.46   | 97.69 | 10.35        | 10.13 Shared |
| 57_vt_13041  | 0    | 0    | 0    | 0.56  | 0.09 | 1.17  | 0.18  | 0.42   | 0.3    | 138.06  | 1.24  | 0.16  | 1.42   | 1.03  | 1.18 | 0.57 | 0.69   | 0.47  | 0.7          | 1.38 ME      |
| 57_vt_13370  | 0.04 | 0    | 0.01 | 7     | 0.38 | 74.45 | 12.32 | 68.51  | 4.04   | 62.23   | 15.89 | 3.87  | 12.23  | 2.27  | 9.68 | 3.64 | 12.42  | 11.3  | 13.25        | 53.52 Shared |
| 57_vt_13799  | 0    | 0    | 0    | 1.38  | 0.02 | 0.44  | 0.18  | 2.87   | 0.21   | 15.4    | 0.49  | 0.09  | 0.71   | 0.8   | 0.58 | 0.27 | 1.25   | 0.35  | 0.56         | 7.16 ME      |
| 57_vt_13903  | 0    | 0    | 0    | 1.32  | 1.02 | 2.33  | 0.12  | 1.18   | 0.83   | 5498.38 | 2.47  | 0.31  | 1.07   | 0.53  | 7.11 | 0.92 | 0.47   | 0.15  | 0.36         | 0.92 ME      |
| 57_vt_14275  | 0    | 0    | 0    | 1.35  | 0.03 | 0.36  | 0.14  | 0.18   | 0.13   | 54.87   | 12.18 | 0.08  | 1.18   | 0.19  | 0.76 | 0.96 | 0.22   | 0.25  | 0.46         | 0.86 Shared  |
| 57_vt_14244  | 0.02 | 0    | 0    | 11.9  | 2.77 | 16.53 | 2     | 49.57  | 4.22   | 52.16   | 30.59 | 10.46 | 8.29   | 52.66 | 4.84 | 5.94 | 33.08  | 1.37  | 13.28        | 6.42 Shared  |
| 57_vt_20200  | 0    | 0    | 0    | 0.98  | 0.11 | 0.49  | 0.05  | 1      | 0.22   | 25.37   | 4.01  | 0.2   | 0.25   | 0.47  | 0.29 | 0.39 | 1.98   | 0.35  | 0.51         | 2.19 ME      |
| 57_vt_21521  | 0    | 0    | 0    | 1.43  | 0.06 | 3.57  | 0.27  | 2.6    | 0.36   | 18.82   | 10.49 | 2.02  | 1.98   | 42.2  | 6.71 | 9.78 | 1.48   | 1.05  | 7.34         | 8.62 Shared  |
| 57_vt_23770  | 0    | 0    | 0    | 1.73  | 2.98 | 4.28  | 1.31  | 118.36 | 4.75   | 59.79   | 17.36 | 0.62  | 0.59   | 0.76  | 1.76 | 0.51 | 185.93 | 0.35  | 7.34         | 1.18 Shared  |
| 57_vt_26235  | 0    | 0    | 0    | 0.54  | 0.07 | 0.48  | 0.1   | 0.62   | 0.93   | 19.03   | 0.75  | 0.13  | 0.27   | 0.33  | 0.29 | 0.35 | 1.04   | 0.43  | 0.78         | 7.8 ME       |
| 57_vt_26757  | 0    | 0    | 0    | 5.11  | 0.51 | 52.68 | 8.68  | 39.96  | 0.92   | 48.8    | 9.3   | 0.76  | 9.5    | 2.53  | 8.34 | 2.35 | 11.52  | 5.47  | 12.23        | 69.11 Shared |
| 57_vt_28150  | 0.01 | 0    | 0    | 1.23  | 0.03 | 1.72  | 0.13  | 1.81   | 0.24   | 14.57   | 0.91  | 0.79  | 0.46   | 0.82  | 1.54 | 0.4  | 0.97   | 0.33  | 0.78         | 1.2 ME       |
| 57_vt_28173  | 0    | 0    | 0    | 0.69  | 0.26 | 0.71  | 0.05  | 0.85   | 0.13   | 26.36   | 0.86  | 0.27  | 0.52   | 0.32  | 0.72 | 0.17 | 0.68   | 0.35  | 0.55         | 3.35 ME      |
| 57_vt_29595  | 0    | 0    | 0    | 0.75  | 0.11 | 0.36  | 0.08  | 0.28   | 0.22   | 0.33    | 0.53  | 0.08  | 0.35   | 0.28  | 0.94 | 0.32 | 0.16   | 0.24  | 0.23         | 0.57 ME      |
| 57_vt_30640  | 0    | 0    | 0    | 0.45  | 0.04 | 1.01  | 0.16  | 0.31   | 0.19   | 39.51   | 0.52  | 0.31  | 0.82   | 0.3   | 0.91 | 0.36 | 0.32   | 0.32  | 5.38         | 23.84 ME     |
| 57_vt_30665  | 0    | 0    | 0    | 0.64  | 0.04 | 0.12  | 0.04  | 0.22   | 0.04   | 4.29    | 0.41  | 0.32  | 0.23   | 0.34  | 0.51 | 0.41 | 0.15   | 0.41  | 0.45         | 0.43 ME      |
| 57_vt_38113  | 0.01 | 0    | 0.01 | 1     | 0.11 | 1.2   | 0.03  | 0.54   | 0.17   | 317.08  | 0.8   | 4.09  | 0.2    | 0.3   | 0.53 | 0.61 | 0.34   | 0.31  | 0.59         | 0.75 ME      |
| 57_vt_38834  | 0    | 0    | 0    | 1.77  | 0.04 | 1.36  | 0.03  | 2.03   | 0.97   | 21.45   | 3.51  | 0.73  | 2.62   | 19.63 | 0.65 | 1.26 | 0.85   | 1.49  | 2.64         | 5.44 ME      |
| 57_vt_40259  | 0    | 0    | 0    | 0.5   | 0.01 | 0.31  | 0.06  | 0.26   | 0.12   | 17.16   | 0.51  | 0.09  | 0.4    | 0.38  | 0.39 | 0.39 | 0.42   | 0.3   | 0.34         | 0.7 ME       |
| 57_vt_41093  | 0    | 0    | 0    | 1.65  | 0.04 | 10.33 | 0.07  | 0.15   | 0.17   | 30.73   | 0.31  | 0.09  | 0.44   | 16.09 | 1.13 | 0.61 | 1.83   | 0.68  | 1.41         | 5.8 Shared   |
| 57_vt_41534  | 0    | 0    | 0    | 0.63  | 0.02 | 0.37  | 0.16  | 0.2    | 0.12   | 218.38  | 0.31  | 0.02  | 0.61   | 0.44  | 0.41 | 0.19 | 0.16   | 0.16  | 0.18         | 0.59 ME      |
| 57_vt_43829  | 0    | 0    | 0    | 1.77  | 0.08 | 0.55  | 0.05  | 0.24   | 0.22   | 20.01   | 0.54  | 0.92  | 0.21   | 0.58  | 1.58 | 0.39 | 0.66   | 0.18  | 0.56         | 0.75 ME      |
| 57_vt_47050  | 0.02 | 0    | 0    | 1.33  | 0.08 | 1.73  | 0.12  | 0.94   | 0.22   | 119.84  | 0.73  | 1.14  | 1.49   | 1.4   | 1.49 | 1.14 | 1.5    | 1.56  | 1.99         | 1.96 ME      |
| 57_vt_48523  | 0    | 0    | 0    | 8.47  | 0.26 | 6.93  | 2.4   | 1.51   | 3.82   | 36.57   | 4.78  | 5.21  | 1.04   | 1.16  | 0.43 | 2.26 | 2.32   | 0.48  | 2.5          | 1.53 ME      |
| 57_vt_48708  | 0    | 0    | 0    | 2.05  | 0.07 | 0.77  | 0.04  | 0.46   | 0.29   | 40.27   | 1.61  | 0.23  | 2.34   | 0.54  | 0.56 | 2.09 | 0.45   | 0.5   | 1.97         | 1.52 ME      |
| 57_vt_48832  | 0    | 0    | 0    | 0.84  | 0.06 | 1.34  | 0.14  | 0.36   | 0.2    | 49.73   | 1.86  | 0.12  | 0.46   | 0.43  | 0.36 | 0.48 | 0.75   | 0.47  | 0.84         | 1.78 ME      |
| 57_vt_49426  | 0    | 0    | 0    | 3.31  | 0.1  | 11.78 | 0.83  | 11.08  | 0.13   | 28.84   | 0.37  | 0.76  | 7.11   | 2.86  | 2.07 | 2.67 | 0.77   | 2.75  | 15.87        | 6.5 Shared   |
| 57_vt_50194  | 0    | 0    | 0    | 0.48  | 0.05 | 0.37  | 0.03  | 17.91  | 32.42  | 92.51   | 1.13  | 0.08  | 0.29   | 0.14  | 0.71 | 0.22 | 0.22   | 0.36  | 25.03 Shared |              |
| 57_vt_51332  | 0    | 0    | 0    | 5.97  | 0.89 | 3.27  | 0.24  | 2.3    | 3.45   | 15.52   | 2.59  | 0.45  | 7.06   | 3.06  | 2.91 | 1.84 | 0.44   | 2.87  | 2.87         | 7.81 ME      |
| 57_vt_55031  | 0    | 0    | 0    | 0.62  | 0.01 | 0.31  | 0.13  | 0.07   | 0.31   | 23.38   | 0.13  | 0.04  | 0.37   | 0.11  | 1.3  | 0.04 | 1.1    | 0.57  | 0.47         | 0.92 ME      |
| 57_vt_55409  | 0.01 | 0    | 0    | 0.57  | 0.04 | 0.91  | 0.29  | 1.28   | 0.69   | 40.85   | 0.95  | 0.62  | 0.44   | 0.66  | 1.02 | 0.39 | 1.61   | 0.22  | 0.37         | 0.47 ME      |
| 57_vt_55526  | 0.04 | 0    | 0    | 1.44  | 0.05 | 0.31  | 0.43  | 0.31   | 0.13   | 27.32   | 1.82  | 0.11  | 0.74   | 0.13  | 1.01 | 0.3  | 0.16   | 0.23  | 0.34         | 0.35 ME      |
| 57_vt_56529  | 0    | 0    | 0    | 1.27  | 0.13 | 0.57  | 0.03  | 0.32   | 0.27   | 103.88  | 0.11  | 0.02  | 0.38   | 0.17  | 0.37 | 0.17 | 0.32   | 0.36  | 1.6          | Shared       |
| 57_vt_59665  | 0    | 0    | 0    | 3.34  | 0.03 | 0.91  | 0.07  | 0.32   | 0.42   | 37.01   | 2.29  | 0.08  | 0.42   | 0.14  | 0.45 | 1.01 | 0.23   | 0.35  | 0.46         | 0.37 ME      |
| 57_vt_69630  | 0.01 | 0    | 0    | 0.93  | 0.04 | 0.45  | 0.17  | 0.52   | 0.47   | 22.28   | 0.88  | 0.12  | 0.44   | 0.22  | 0.35 | 0.41 | 0.37   | 0.18  | 0.33         | 0.49 ME      |
| 57_vt_70265  | 0    | 0    | 0    | 0.45  | 0.06 | 0.24  | 0.01  | 0.21   | 0.1    | 33.46   | 0.43  | 0.08  | 0.35   | 0.29  | 0.71 | 0.24 | 0.17   | 0.18  | 0.39         | 112.96 ME    |
| 57_vt_73280  | 0.02 | 0    | 0    | 2.54  | 0.02 | 8.65  | 0.24  | 0.05   | 0.12   | 31.55   | 0.24  | 0.09  | 0.44   | 0.09  | 0.41 | 0.07 | 0.84   | 0.25  | 0.41         | 0.25 ME      |
| 57_vt_78507  | 0.02 | 0.01 | 0    | 2.16  | 0.16 | 4.28  | 0.67  | 11.09  | 0.3    | 12.49   | 0.79  | 5.46  | 0.34   | 31.47 | 0.36 | 0.68 | 69.74  | 1.19  | 24.67        | 2.73 Shared  |
| 57_vt_82140  | 0    | 0    | 0    | 0.36  | 0.04 | 0.32  | 0.08  | 0.3    | 0.12   | 28.56   | 0.41  | 0.06  | 6.65   | 0.23  | 0.45 | 1.06 | 0.29   | 2.77  | 0.36         | 0.72 ME      |
| 57_vt_83100  | 0    | 0    | 0    | 1.38  | 0.06 | 1.59  | 0.08  | 0.4    | 0.62   | 28.59   | 0.64  | 0.24  | 0.64   | 0.24  | 0.94 | 0.24 | 0.75   | 1     | 1.51         | 0.84 ME      |
| 57_vt_83474  | 0    | 0    | 0    | 0.74  | 0.43 | 0.35  | 0.11  | 0.29   | 0.05   | 11.18   | 0.89  | 0.09  | 0.62   | 1.19  | 0.48 | 0.27 | 0.53   | 0.19  | 1.91         | 0.25 ME      |
| 57_vt_86377  | 0    | 0    | 0    | 1.15  | 0.12 | 3.17  | 0.08  | 0.71   | 0.17   | 142.16  | 0.98  | 0.71  | 0.48   | 17.88 | 1.16 | 0.58 | 0.54   | 0.49  | 0.78         | 1.2 ME       |
| 57_vt_87279  | 0.01 | 0    | 0.01 | 3.41  | 0.1  | 2.39  | 0.27  | 0.23   | 0.13   | 24.12   | 1.26  | 0.12  | 1.55   | 1.46  | 0.97 | 0.97 | 0.21   | 0.27  | 3.22         | 10.68 ME     |
| 57_vt_87439  | 0    | 0    | 0    | 4.74  | 0.09 | 11.56 | 0.78  | 1.66   | 0.47   | 157.71  | 1.19  | 1.14  | 1.76   | 6.45  | 0.51 | 1.29 | 16.44  | 0.76  | 1.99         | 0.5 ME       |
| 57_vt_90915  | 0    | 0    | 0    | 0.37  | 0.02 | 0.29  | 0.07  | 0.44   | 0.19   | 22.01   | 0.43  | 0.09  | 0.42   | 0.28  | 0.36 | 0.4  | 0.72   | 0.23  | 0.54         | 0.59 ME      |
| 57_vt_97373  | 0.02 | 0    | 0    | 3.99  | 0.13 | 27.8  | 3.77  | 22.65  | 2.18   | 50.57   | 7.2   | 2.21  | 6.14   | 1.55  | 0.55 | 2.76 | 7.16   | 6.59  | 7.9          | 32.16 ME     |
| 57_vt_100640 | 0    | 0    | 0    | 1.08  | 0.01 | 0.37  | 0.12  | 0.17   | 0.17   | 11.7    | 0.49  | 0.09  | 0.71   | 0.14  | 0.24 | 0.09 | 0.71   | 0.78  | 0.97         | 0.78 ME      |
| 57_vt_101751 | 0.01 | 0</  |      |       |      |       |       |        |        |         |       |       |        |       |      |      |        |       |              |              |

|               |      |      |      |        |         |        |        |        |         |         |         |        |         |        |        |        |        |         |           |               |
|---------------|------|------|------|--------|---------|--------|--------|--------|---------|---------|---------|--------|---------|--------|--------|--------|--------|---------|-----------|---------------|
| s16_vs_173079 | 0    | 0    | 0    | 9.12   | 0.04    | 0.33   | 0.09   | 0.25   | 0.15    | 0.17    | 0.54    | 0.1    | 2.33    | 5.88   | 2.32   | 2.99   | 5.33   | 6.3     | 33.63     | 0.78 SHMC     |
| s16_vs_173096 | 0    | 0    | 0.01 | 14.74  | 16.39   | 0.65   | 0.01   | 0.26   | 0.12    | 0.87    | 0.65    | 0.59   | 0.46    | 0.73   | 0.56   | 3.32   | 0.51   | 0.57    | 2860.57   | 1.36 Shared   |
| s16_vs_173102 | 0.2  | 0    | 0.18 | 236.24 | 0.61    | 262.06 | 162.99 | 336.09 | 855.2   | 6.29    | 1.73    | 3.74   | 1.24    | 2.2    | 0.54   | 37.3   | 0.34   | 0.69    | 76.47     | 181.93 Shared |
| s16_vs_173141 | 0    | 0    | 0    | 0.52   | 0       | 0.28   | 0.06   | 0.13   | 0.16    | 0.04    | 0.4     | 0.06   | 0.11    | 38.91  | 0.48   | 0.14   | 0.07   | 0.11    | 79.75     | 1 Shared      |
| s16_vs_4662   | 0    | 0    | 0    | 0.87   | 0.08    | 0.49   | 0.04   | 0.3    | 0.15    | 0.24    | 0.48    | 0.13   | 0.49    | 0.16   | 0.32   | 0.62   | 0.32   | 0.16    | 61.64     | 0.6 SHMC      |
| s16_vs_10622  | 0    | 0    | 1.15 | 0.25   | 0.12    | 0.44   | 0.24   | 0.24   | 7.13    | 11.57   | 1.17    | 8.7    | 1.89    | 2.99   | 129.23 | 1.73   | 0.33   | 0.69    | 28.1      | 0.64 SHMC     |
| s16_vs_11649  | 0    | 0    | 0    | 0.26   | 0.04    | 0.43   | 0.11   | 0.58   | 0.92    | 0.13    | 0.71    | 0.13   | 0.54    | 0.34   | 0.34   | 1.32   | 0.34   | 0.3     | 160.76    | 0.79 SHMC     |
| s16_vs_17493  | 0    | 0    | 0    | 0.4    | 0.01    | 0.37   | 0.03   | 30.36  | 0.21    | 17.06   | 11.3    | 0.11   | 1.81    | 4.8    | 0.3    | 0.28   | 2.31   | 0.2     | 15.98     | 4.25 Shared   |
| s16_vs_18293  | 0    | 0    | 0.77 | 0.05   | 0.39    | 0.05   | 0.42   | 0.19   | 0.38    | 0.23    | 0.76    | 0.11   | 0.29    | 0.73   | 0.5    | 0.219  | 0.19   | 0.26    | 0.62 SHMC |               |
| s16_vs_18440  | 0    | 0    | 0    | 1.83   | 0.07    | 5.26   | 1.8    | 0.26   | 0.7     | 0.16    | 1.28    | 0.19   | 0.66    | 0.2    | 0.7    | 0.62   | 0.49   | 0.23    | 57.52     | 4.04 SHMC     |
| s16_vs_19320  | 0    | 0    | 0.01 | 0.51   | 0.01    | 0.2    | 0.01   | 0.26   | 0.09    | 0.06    | 0.47    | 0.06   | 0.14    | 0.26   | 0.24   | 4.91   | 0.17   | 0.78    | 16.54     | 0.37 SHMC     |
| s16_vs_19998  | 0.01 | 0.01 | 0    | 27.63  | 10.53   | 8.85   | 0.25   | 12.99  | 635     | 742     | 43.66   | 8.45   | 8.12    | 2.59   | 21.32  | 8.42   | 1.89   | 13.36   | 87.81     | 13.22 Shared  |
| s16_vs_26078  | 0    | 0    | 0    | 12.83  | 0.61    | 0.09   | 0.12   | 0.17   | 0.13    | 0.17    | 0.83    | 0.17   | 0.93    | 0.17   | 0.97   | 0.27   | 0.24   | 0.23    | 334.28    | 21.25 Shared  |
| s16_vs_32764  | 0.01 | 0.01 | 0    | 13.34  | 6.92    | 16.55  | 14.25  | 23.64  | 14.34   | 14.23   | 92.69   | 14.43  | 47.44   | 9.3    | 45     | 9.47   | 41.16  | 36.16   | 91.02     | 13.18 Shared  |
| s16_vs_33281  | 0.02 | 0.01 | 0.04 | 3.15   | 0.85    | 26.38  | 0.16   | 3.76   | 3.8     | 2.33    | 21.9    | 541.44 | 12.57   | 1.67   | 17.22  | 4.69   | 0.54   | 8.82    | 25.85     | 20.86 Shared  |
| s16_vs_34021  | 0.03 | 0    | 0    | 3.92   | 0.57    | 2.18   | 0.12   | 0.44   | 0.24    | 7.13    | 11.57   | 1.17   | 8.7     | 1.89   | 2.99   | 129.23 | 1.73   | 0.33    | 2.31      | Shared        |
| s16_vs_34751  | 0    | 0    | 0    | 0.53   | 0.05    | 0.43   | 4.17   | 41.66  | 39.68   | 15.11   | 14.8    | 0.19   | 0.21    | 1.72   | 0.69   | 0.4    | 12.32  | 0.52    | 44.94     | 3.6 Shared    |
| s16_vs_35031  | 0    | 0    | 0    | 1.75   | 0.51    | 1.69   | 0.12   | 0.55   | 0.38    | 1.12    | 3.54    | 0.72   | 0.53    | 1.67   | 0.63   | 0.54   | 2.33   | 0.29    | 18.71     | 0.94 SHMC     |
| s16_vs_38863  | 0    | 0.01 | 0    | 0.46   | 0.07    | 5.81   | 0.13   | 0.35   | 0.18    | 0.41    | 0.68    | 0.14   | 9.29    | 0.25   | 1.19   | 0.78   | 0.45   | 9.53    | 188.36    | 0.97 SHMC     |
| s16_vs_48714  | 0    | 0    | 0    | 1.89   | 0.04    | 3.26   | 0.22   | 0.32   | 0.24    | 3.59    | 6.54    | 0.59   | 3.38    | 5.16   | 1.76   | 2      | 5.59   | 3.01    | 29.85     | 1.9 SHMC      |
| s16_vs_51901  | 0    | 0    | 0    | 0.72   | 0.01    | 0.21   | 0.07   | 0.36   | 0.52    | 0.09    | 0.5     | 0.35   | 0.37    | 0.25   | 0.4    | 1.08   | 0.23   | 0.3     | 1465.95   | 0.88 SHMC     |
| s16_vs_54250  | 0.01 | 0    | 0    | 0.58   | 0.24    | 6.8    | 0.21   | 1.28   | 343     | 0.4     | 3.07    | 0.31   | 2.92    | 1.69   | 3.15   | 1.68   | 1.49   | 1.37    | 37.6      | 2.59 SHMC     |
| s16_vs_54616  | 0.02 | 0    | 0    | 0.42   | 0.02    | 0.27   | 0.07   | 0.12   | 0.06    | 0.6     | 1.33    | 0.06   | 0.2     | 0.25   | 1.95   | 0.08   | 0.15   | 0.17    | 21.4      | 0.35 SHMC     |
| s16_vs_64584  | 0    | 0    | 0    | 1.67   | 0.02    | 0.38   | 1.28   | 0.3    | 0.24    | 0.29    | 1.25    | 0.13   | 3.21    | 0.25   | 1.21   | 1.38   | 17.93  | 4.46    | 25.63     | 0.51 Shared   |
| s16_vs_80244  | 0    | 0.01 | 0.01 | 15.36  | 1.16    | 26.72  | 0.43   | 0.67   | 0.38    | 0.59    | 1.31    | 0.5    | 21.69   | 0.65   | 1.06   | 5.31   | 2.06   | 1.28    | 21.57     | 52.13 Shared  |
| s16_vs_81805  | 0.01 | 0    | 0.01 | 1.94   | 0.04    | 1.27   | 0.06   | 1.24   | 0.21    | 1.03    | 0.43    | 1.54   | 0.31    | 0.51   | 0.4    | 0.3    | 6.6    | 5.2     | 24.6      | 0.58 SHMC     |
| s16_vs_82116  | 0    | 0    | 0    | 7.67   | 2.95    | 25.77  | 0.29   | 36.92  | 11.51   | 16.02   | 8.64    | 3.86   | 12.83   | 20.5   | 2.68   | 3.89   | 35.92  | 0.61    | 42.15     | 1.92 Shared   |
| s16_vs_86116  | 0    | 0    | 0    | 1.03   | 0.02    | 0.4    | 0.03   | 0.24   | 0.17    | 2.35    | 0.25    | 0.1    | 0.63    | 26.92  | 0.05   | 0.36   | 2.5    | 0.47    | 35.1      | 0.95 Shared   |
| s16_vs_89511  | 0    | 0    | 0    | 7.23   | 0.17    | 4.18   | 0.08   | 17.71  | 8.07    | 6.65    | 4.38    | 2.06   | 7.68    | 4.26   | 5.28   | 5.3    | 4.01   | 8.43    | 20.45     | 30.7 Shared   |
| s16_vs_92110  | 0.01 | 0    | 0    | 0.68   | 0.06    | 1.1    | 0.1    | 0.46   | 0.06    | 0.51    | 0.1     | 0.49   | 0.29    | 0.21   | 0.54   | 0.29   | 0.27   | 0.32    | 19.98     | 0.27 SHMC     |
| s16_vs_101072 | 0    | 0    | 0    | 1.97   | 0.05    | 7.72   | 0.08   | 0.33   | 0.18    | 0.2     | 0.3     | 2.03   | 0.69    | 0.14   | 0.26   | 0.54   | 0.3    | 0.31    | 12.86     | 1.06 SHMC     |
| s16_vs_101671 | 0.02 | 0    | 0    | 1.85   | 0       | 19.38  | 0      | 0.23   | 0.08    | 0.04    | 0.14    | 0.02   | 0.1     | 0.02   | 0.14   | 0.3    | 0.11   | 0.13    | 20.83     | 0.52 Shared   |
| s16_vs_103726 | 0    | 0    | 0    | 0.72   | 0.04    | 2.29   | 0.18   | 0.26   | 0.14    | 1.36    | 0.25    | 0.16   | 0.4     | 0.36   | 0.4    | 0.15   | 0.68   | 0.67    | 14.44     | 0.65          |
| s16_vs_107325 | 0.02 | 0    | 0    | 3.21   | 0.1     | 4.5    | 0.1    | 0.84   | 0.52    | 4.93    | 8.09    | 2.7    | 4.85    | 6.45   | 1.32   | 2.18   | 6.73   | 3.11    | 35.07     | 2.81 SHMC     |
| s16_vs_116956 | 0    | 0    | 0    | 2.04   | 0.28    | 7.25   | 0.11   | 0.37   | 1.4     | 0.46    | 1.02    | 0.22   | 0.91    | 0.46   | 0.95   | 0.96   | 0.38   | 0.7     | 17.12     | 1.83 SHMC     |
| s16_vs_118209 | 0    | 0    | 0    | 0.6    | 0.08    | 1.34   | 0.14   | 0.32   | 0.25    | 2.55    | 0.56    | 0.74   | 0.77    | 0.32   | 0.63   | 0.51   | 0.47   | 0.42    | 192.8     | 2.49 SHMC     |
| s16_vs_120149 | 0    | 0    | 0    | 0.55   | 0.02    | 0.35   | 0.13   | 0.26   | 0.16    | 0.18    | 0.41    | 0.07   | 0.49    | 0.19   | 0.27   | 0.84   | 0.58   | 0.8     | 8.84      | 0.38          |
| s16_vs_120605 | 0    | 0    | 0    | 0.1    | 0       | 0.13   | 0.55   | 0.05   | 0.01    | 0.04    | 0.23    | 0.14   | 0.21    | 0.01   | 0.08   | 0.25   | 0.11   | 0       | 7.07      | 0.09 SHMC     |
| s16_vs_120622 | 0    | 0    | 0    | 0.49   | 0.01    | 0.22   | 0.05   | 4.36   | 1.03    | 0.21    | 0.32    | 0.05   | 0.22    | 0.14   | 3.08   | 0.12   | 3.63   | 0.2     | 68.32     | 0.64 SHMC     |
| s16_vs_124703 | 0    | 0    | 0    | 23.37  | 0.02    | 0.19   | 0.13   | 0.31   | 0.11    | 0.74    | 0.29    | 0.13   | 0.13    | 0.29   | 0.16   | 0.14   | 0.17   | 0.1     | 204.41    | 0.5 Shared    |
| s16_vs_127669 | 1.09 | 0.23 | 1.49 | 28.34  | 2.61    | 182.73 | 7.93   | 5.95   | 3.88    | 1975.51 | 197.36  | 26.14  | 200.3   | 28.03  | 56.79  | 880.54 | 26.06  | 3867.01 | 81.62     | 18.03 Shared  |
| s16_vs_132979 | 0    | 0.01 | 0.01 | 1.83   | 0.11    | 1.38   | 2.35   | 4.98   | 7.52    | 1.83    | 3.25    | 1.07   | 1.84    | 0.12   | 2.92   | 0.56   | 0.42   | 0.7     | 11.13     | 17.85 Shared  |
| s16_vs_136935 | 0    | 0    | 0    | 15.93  | 0.2     | 26.78  | 6.56   | 1.92   | 0.33    | 4.83    | 1.38    | 0.61   | 2.62    | 1.94   | 0.97   | 4.87   | 215.52 | 5.37    | 25.6      | 80.55 Shared  |
| s16_vs_137222 | 0    | 0    | 0    | 0.56   | 0.04    | 0.08   | 0.43   | 0.11   | 0.13    | 0.45    | 0.09    | 0.63   | 0.62    | 0.26   | 0.3    | 0.24   | 0.09   | 0.33    | 41.8      | 0.98 SHMC     |
| s16_vs_140468 | 0    | 0    | 0    | 4.71   | 0.57    | 18.17  | 0.07   | 0.58   | 4.5     | 2.11    | 2.31    | 0.76   | 3.62    | 3.46   | 2.58   | 3.12   | 0.34   | 2.63    | 18.01     | 4.85 Shared   |
| s16_vs_140709 | 0    | 0.01 | 0    | 55.25  | 0.16    | 0.42   | 0.08   | 0.25   | 0.12    | 0.19    | 0.88    | 0.21   | 0.52    | 0.64   | 13.96  | 7.98   | 0.34   | 1       | 26.85     | 60.25 Shared  |
| s16_vs_141218 | 0    | 0    | 0    | 1.79   | 0.06    | 1.79   | 0.29   | 0.35   | 0.36    | 0.45    | 2.04    | 0.78   | 1.84    | 0.35   | 37.35  | 1.34   | 2.81   | 0.21    | 4253.9    | 1.13 Shared   |
| s16_vs_142561 | 0.01 | 0    | 0.01 | 1.31   | 0.22    | 3.69   | 126.85 | 21.76  | 3.35    | 1.55    | 12.44   | 1.26   | 1.54    | 5.57   | 7.78   | 0.69   | 3.14   | 1.82    | 26.66     | 1.82 Shared   |
| s16_vs_165662 | 0    | 0    | 0    | 1.06   | 0.55    | 6.36   | 0.65   | 0.6    | 0.42    | 0.47    | 12.41   | 0.19   | 11.57   | 0.69   | 10.84  | 3.74   | 0.87   | 0.64    | 158.61    | 2.22 SHMC     |
| s16_vs_16644  | 0    | 0.01 | 0.28 | 0.02   | 34.83   | 0.09   | 0.44   | 0.28   | 0.24    | 0.28    | 0.24    | 0.21   | 30.99   | 0.28   | 0.4    | 0.32   | 0.35   | 0.25    | 1.65      | Shared        |
| s16_vs_18671  | 0.01 | 0    | 0    | 14.68  | 12.66   | 19.6   | 38.48  | 17.87  | 28.51   | 154.07  | 1.36    | 0.26   | 116.97  | 16.27  | 0.48   | 41.21  | 0.27   | 0.21    | 46.26     | 0.55 Shared   |
| s16_vs_24791  | 0.01 | 0    | 0    | 0.53   | 0.02    | 0.25   | 0.1    | 0.21   | 0.07    | 0.08    | 0.57    | 0.12   | 44.39   | 0.24   | 0.28   | 3.4    | 0.21   | 0.22    | 0.23      | 0.52 SHMC     |
| s16_vs_25241  | 0    | 0    | 0    | 0.4    | 0       | 15.95  | 0.06   | 0.04   | 0.06    | 0.06    | 3.92    | 0.18   | 65.24   | 1.38   | 0.37   | 8.1    | 0.13   | 0.12    | 0.13      | 0.62 Shared   |
| s16_vs_26800  | 0.02 | 1.67 | 1.67 | 32.72  | 1147.06 | 10.3   | 20     | 457.83 | 1260.26 | 2787.52 | 1470.28 | 7.72   | 1545.93 | 507    | 67.86  | 888.66 | 20     | 89      | 26.16     | Shared        |
| s16_vs_43964  | 0    | 0.02 | 0    | 0.85   | 0.07    | 4.6    | 0.98   | 0.45   | 0.15    | 0.18    | 0.65    | 0.31   | 111.18  | 4.12   | 0.81   | 1.66   | 4.62   | 0.91    | 4.07      | SHMC          |
| s16_vs_46328  | 0    | 0    | 0    | 0.98   | 0.05    | 2.69   | 0.64   | 0.34   | 0.1     | 0.2     | 0.3     | 0.24   | 27.69   | 0.3    | 0.37   | 3.73   | 0.33   | 0.49    | 0.32      | 0.5 SHMC      |
| s16_vs_47170  | 0    | 0    | 0    | 2      | 0.05    | 0.12   | 0.04   | 0.52   | 0.35    | 0.55    | 6.64    | 0.11   | 52.87   | 0.25   | 7.96   | 0.96   | 0.19   | 0.22    | 1.45      | 2.21 Shared   |
| s16_vs_57705  | 0    | 0    | 0    | 0.49   | 0.02    | 0.47   | 0.04   | 0.43   | 0.12    | 0.11    | 0.85    | 0.41   | 392.42  | 0.35   | 1.92   | 2.9    | 0.24   | 4.82    | 0.41      | 0.73 SHMC     |
| s16_vs_62230  | 0    | 0    | 0    | 1.09   | 0.02    | 1.9    | 0.26   | 0.5    | 0.19    | 0.32    | 1.49    | 0.18   | 26.02   | 0.37   | 1.45   | 3.12   | 0.62   | 0.47    | 0.97      | 1.22 SHMC     |
| s16_vs_64371  | 0    | 0    | 0.35 | 3.83   | 0.62    | 4.13   | 0.09   | 5.45   | 0.1     | 0.12    | 0.35    | 499.82 | 1898.08 | 1.07   | 1.36   | 37.99  | 1.02   | 0.69    | 1.51      | 2.25 Shared   |
| s16_vs_80712  | 0    | 0    | 0    | 4.57   | 0.04    | 18.38  | 0.1    | 4.08   | 0.35    | 0.13    | 36.59   | 0.37   | 105.84  | 152.77 | 1.36   | 0.37   | 1.18   | 0.65    | 0.77      | 1.41 SHMC     |
| s16_vs_113489 | 0    | 0    | 0    | 0.51   | 0.03    | 0.29   | 0.07   | 0.23   | 0.1     | 0.15    | 0.29    | 0.09   | 20.76   | 0.17   | 0.16   | 3.46   | 0.15   | 0.15    | 0.52      | SHMC          |
| s16_vs_120738 | 0    | 0.01 | 0.01 | 22.11  | 0.07    | 0.61   | 0.12   | 10.41  | 16.07   | 0.26    | 207.35  | 128.76 | 26.3    | 109.75 | 31.33  | 16.46  | 0.35   | 55.15   | 17.46     | 0.87 Shared   |
| s16_vs_149473 | 0    | 0    | 0    | 1.07   | 0.02    | 2.49   | 0.21   |        |         |         |         |        |         |        |        |        |        |         |           |               |

|               |      |      |      |        |         |         |      |        |        |       |        |      |        |        |         |         |       |         |       |        |        |
|---------------|------|------|------|--------|---------|---------|------|--------|--------|-------|--------|------|--------|--------|---------|---------|-------|---------|-------|--------|--------|
| S12_vs_86928  | 0    | 0    | 0    | 0.81   | 0.01    | 0.76    | 0.1  | 6.55   | 0.12   | 0.31  | 0.97   | 0.14 | 0.75   | 0.31   | 93.35   | 0.22    | 0.88  | 0.24    | 0.36  | 0.59   | SHMC   |
| S12_vs_87088  | 0.02 | 0.01 | 0    | 3.28   | 0.12    | 2.14    | 8.69 | 24.26  | 0.45   | 2.63  | 5.29   | 5.75 | 2.33   | 4.96   | 30.71   | 1.23    | 2.22  | 0.52    | 4.11  | 6.64   | Shared |
| S12_vs_87095  | 0    | 0    | 0    | 1.59   | 0.02    | 0.63    | 0.81 | 0.53   | 0.9    | 0.25  | 0.42   | 0.11 | 0.89   | 0.26   | 17.27   | 0.63    | 0.22  | 0.41    | 39.28 | 0.64   | SHMC   |
| S12_vs_167155 | 0    | 0    | 0    | 1      | 0.02    | 0.4     | 0.06 | 0.22   | 0.12   | 0.15  | 0.53   | 0.08 | 0.31   | 0.24   | 27.07   | 0.37    | 0.21  | 0.37    | 0.31  | 0.61   | SHMC   |
| S12_vs_15980  | 0    | 0    | 0.01 | 0.74   | 0.14    | 12.39   | 0.79 | 1.98   | 0.36   | 5.31  | 23.87  | 0.25 | 1.7    | 1.62   | 235.58  | 2.55    | 3.05  | 1.1     | 1.58  | 2.58   | Shared |
| S12_vs_111115 | 0    | 0    | 0    | 0.69   | 0.05    | 0.2     | 0.4  | 0.15   | 0.38   | 0.05  | 0.2    | 0.1  | 0.4    | 0.1    | 7415.06 | 0.76    | 1.57  | 0.99    | 2.39  | 0.5    | SHMC   |
| S12_vs_183891 | 0    | 0    | 0    | 0.13   | 0.05    | 0.59    | 0.02 | 0.06   | 0.05   | 0.7   | 1.09   | 9.03 | 0.14   | 0.31   | 276.74  | 0.01    | 0.24  | 0.15    | 0.13  | 0.67   | SHMC   |
| S12_vs_137069 | 0    | 0    | 0    | 51.06  | 0.01    | 0.25    | 0.06 | 0.21   | 0.1    | 4.67  | 0.86   | 1.5  | 2.35   | 0.23   | 16.64   | 78.96   | 0.1   | 0.29    | 0.29  | 0.69   | Shared |
| S12_vs_188820 | 0    | 0    | 0.61 | 0.03   | 0.6     | 0.1     | 0.56 | 0.2    | 0.36   | 2.23  | 0.15   | 0.75 | 0.82   | 0.1    | 0.89    | 0.26    | 0.11  | 0.52    | 0.89  | SHMC   |        |
| S12_vs_188821 | 0    | 0    | 0    | 1.29   | 0.07    | 1.7     | 0.15 | 0.36   | 0.18   | 0.99  | 0.74   | 0.28 | 0.88   | 0.45   | 1058.2  | 0.59    | 0.68  | 0.47    | 1.01  | 1.08   | SHMC   |
| S12_vs_188823 | 0    | 0    | 0    | 0.49   | 0.01    | 0.47    | 0.16 | 0.19   | 0.07   | 0.27  | 0.57   | 0.11 | 0.71   | 0.62   | 116.17  | 0.18    | 0.4   | 0.3     | 0.26  | 1.01   | SHMC   |
| S12_vs_188825 | 0    | 0    | 0    | 1.37   | 0.04    | 1.14    | 0.03 | 0.22   | 0.1    | 1.67  | 0.45   | 0.08 | 0.33   | 0.25   | 81.12   | 0.35    | 0.19  | 0.22    | 10.78 | 0.54   | SHMC   |
| S12_vs_188828 | 0    | 0    | 0    | 2.44   | 0.04    | 0.02    | 0.3  | 0.11   | 0.49   | 0.02  | 0.3    | 0.42 | 0.11   | 0.4    | 101.96  | 0.79    | 0.13  | 0.25    | 0.46  | SHMC   |        |
| S12_vs_188832 | 0    | 0    | 0    | 0.46   | 0.06    | 0.66    | 0.06 | 0.27   | 0.31   | 0.4   | 1.46   | 0.1  | 0.7    | 2.8    | 350.41  | 0.44    | 0.43  | 0.38    | 0.82  | 1.21   | SHMC   |
| S12_vs_188833 | 0    | 0    | 0    | 0.79   | 0.02    | 0.2     | 0.07 | 0.19   | 0.08   | 0.91  | 1      | 0.05 | 0.39   | 5.51   | 20.94   | 0.16    | 1.16  | 0.19    | 0.38  | 0.27   | SHMC   |
| S12_vs_118154 | 0    | 0    | 0    | 0.34   | 0.02    | 0.26    | 0.21 | 0.21   | 0.16   | 0.19  | 0.57   | 0.1  | 0.42   | 0.1    | 121.61  | 0.19    | 0.2   | 0.42    | 0.47  | 0.5    | SHMC   |
| S12_vs_8204   | 0    | 0    | 0    | 0.9    | 0.04    | 2.91    | 0.11 | 0.3    | 0.19   | 14.22 | 17.3   | 0.25 | 0.62   | 0.48   | 39.03   | 0.53    | 0.37  | 1.16    | 0.63  | 5.84   | Shared |
| S12_vs_71525  | 0    | 0    | 0.02 | 1.63   | 0.27    | 49.45   | 0.22 | 0.75   | 0.63   | 0.47  | 15.63  | 0.16 | 2.95   | 1.52   | 25.32   | 0.22    | 0.5   | 1.54    | 3.68  | 5.05   | Shared |
| S12_vs_142425 | 0.01 | 0.01 | 0    | 4.96   | 1.84    | 8.98    | 0.34 | 10.92  | 6.94   | 4.83  | 59.51  | 9.06 | 8.57   | 3.22   | 53.11   | 2.69    | 1.32  | 12.96   | 26.79 | 10.36  | Shared |
| S12_vs_48045  | 0    | 0    | 0    | 0.77   | 0.02    | 0.33    | 0.06 | 0.13   | 0.08   | 0.07  | 0.31   | 0.05 | 0.27   | 0.13   | 33.03   | 0.14    | 0.14  | 0.25    | 0.29  | 0.36   | SHMC   |
| S12_vs_111286 | 0    | 0    | 0    | 0.7    | 0.02    | 0.23    | 0.08 | 0.13   | 0.09   | 0.23  | 0.29   | 0.08 | 0.33   | 0.16   | 147.21  | 0.24    | 0.22  | 0.24    | 0.23  | 0.46   | SHMC   |
| S12_vs_150812 | 0    | 0    | 0    | 0.55   | 0.02    | 13.33   | 0.1  | 0.3    | 0.15   | 0.68  | 0.64   | 0.17 | 0.4    | 0.27   | 28.13   | 1.59    | 0.23  | 0.17    | 0.32  | 0.57   | Shared |
| S12_vs_151292 | 0.59 | 0.19 | 0.74 | 16.97  | 4.23    | 9415.28 | 4.65 | 20.05  | 7.59   | 620.8 | 79.79  | 16.3 | 13.13  | 21.16  | 112.69  | 463.73  | 53.18 | 2241.87 | 35.87 | 27.03  | Shared |
| S12_vs_183752 | 0    | 0    | 0    | 0.95   | 0.03    | 0.75    | 0.15 | 0.43   | 0.61   | 0.41  | 1.67   | 0.12 | 1.63   | 0.95   | 62.29   | 0.86    | 0.52  | 0.57    | 0.78  | 1.21   | SHMC   |
| S12_vs_58148  | 0.02 | 0    | 0    | 2.21   | 0.24    | 1.46    | 0.06 | 0.42   | 0.17   | 0.89  | 0.82   | 0.15 | 0.78   | 0.2    | 367.06  | 0.49    | 0.73  | 0.3     | 0.49  | 0.61   | SHMC   |
| S12_vs_26336  | 0.01 | 0    | 0    | 4.33   | 2.21    | 5.26    | 0.21 | 19.27  | 14.89  | 4.18  | 49.42  | 5.23 | 3.41   | 6.33   | 33.55   | 1.91    | 1.36  | 23.07   | 4.35  | Shared |        |
| S12_vs_81739  | 0    | 0    | 0    | 1.2    | 16.96   | 0.42    | 0.12 | 0.11   | 0.13   | 0.32  | 0.5    | 0.13 | 0.48   | 0.22   | 150.09  | 0.42    | 0.3   | 0.48    | 0.5   | SHMC   |        |
| S12_vs_39475  | 0    | 0    | 0    | 3.94   | 0.13    | 0.33    | 0.04 | 0.21   | 0.11   | 0.26  | 1.28   | 0.13 | 0.93   | 2.19   | 92.57   | 0.69    | 0.39  | 0.29    | 0.86  | 2.99   | SHMC   |
| S12_vs_58560  | 0    | 0    | 0    | 0.56   | 0.01    | 0.25    | 0.04 | 0.21   | 0.11   | 0.27  | 0.6    | 0.05 | 0.46   | 1.39   | 18.39   | 0.9     | 0.34  | 0.22    | 0.44  | 0.38   | SHMC   |
| S12_vs_26847  | 0    | 0    | 0    | 1.3    | 0.51    | 1.74    | 0.07 | 0.19   | 0.11   | 0.36  | 0.44   | 0.06 | 0.57   | 0.19   | 27.72   | 0.3     | 0.18  | 0.26    | 0.76  | SHMC   |        |
| S12_vs_106289 | 0    | 0    | 0    | 1.21   | 0.04    | 0.52    | 1.89 | 2.2    | 0.8    | 0.93  | 12.38  | 2.09 | 0.76   | 2.02   | 45.96   | 0.4     | 1.36  | 0.51    | 0.56  | 1.61   | SHMC   |
| S12_vs_74280  | 0    | 0    | 0    | 0.48   | 0       | 32.76   | 0.17 | 0.2    | 0.09   | 0.32  | 15.83  | 0.04 | 5.05   | 3.47   | 27.28   | 0.09    | 0.11  | 0.66    | 0.2   | 0.28   | Shared |
| S12_vs_99092  | 0    | 0    | 0    | 1.14   | 0.24    | 2.75    | 0.4  | 0.08   | 0.51   | 0.58  | 0.5    | 0.09 | 0.54   | 0.38   | 12.17   | 0.54    | 0.23  | 0.96    | 0.43  | 0.96   | SHMC   |
| S12_vs_99219  | 0    | 0    | 0    | 0.74   | 0.08    | 0.74    | 0.29 | 0.28   | 0.17   | 0.25  | 0.96   | 0.19 | 1.09   | 11.06  | 25.72   | 2.4     | 1.81  | 0.48    | 0.9   | 5.73   | Shared |
| S12_vs_138261 | 0    | 0    | 0    | 0.46   | 0.12    | 0.3     | 0.29 | 0.17   | 0.25   | 1.45  | 3.94   | 0.09 | 0.51   | 130.32 | 57.83   | 0.46    | 0.78  | 0.23    | 1.38  | 11.67  | Shared |
| S12_vs_121913 | 0    | 0    | 0    | 2.05   | 0.17    | 2.4     | 0.15 | 3.28   | 1.25   | 0.5   | 4.17   | 0.12 | 2.62   | 4.33   | 25.51   | 0.56    | 1.76  | 0.88    | 4.52  | 4.77   | SHMC   |
| S12_vs_153790 | 0    | 0    | 0    | 0.75   | 0.02    | 0.75    | 0.15 | 0.33   | 0.12   | 2.84  | 0.84   | 0.08 | 0.33   | 0.24   | 1.98    | 0.34    | 0.2   | 0.34    | 0.19  | 0.58   | SHMC   |
| S12_vs_75098  | 0.01 | 0    | 0    | 0.65   | 0.04    | 1.39    | 0.19 | 1.73   | 0.43   | 0.92  | 2.22   | 0.51 | 1.25   | 1.2    | 46.69   | 3.78    | 1.28  | 0.91    | 3.74  | 1.64   | SHMC   |
| S12_vs_28661  | 0.01 | 0    | 0    | 1.25   | 0.01    | 0.21    | 0.02 | 0.23   | 0.17   | 0.8   | 4.16   | 0.09 | 0.19   | 0.18   | 45.48   | 2.16    | 0.2   | 0.22    | 0.26  | 0.54   | SHMC   |
| S12_vs_58517  | 0.01 | 0    | 0.01 | 0.62   | 0.02    | 0.23    | 0.02 | 0.23   | 0.09   | 0.23  | 0.13   | 0.05 | 0.27   | 0.13   | 6.69    | 0.37    | 0.14  | 0.17    | 0.14  | 0.54   | SHMC   |
| S12_vs_92868  | 0.01 | 0    | 0    | 1.92   | 0.17    | 3.02    | 0.07 | 459.82 | 719.49 | 1.79  | 0.94   | 1.19 | 1.08   | 6.94   | 635.59  | 1.28    | 19.69 | 0.71    | 2.44  | 1.44   | Shared |
| S12_vs_123620 | 0    | 0    | 0    | 1.07   | 0.9     | 2.51    | 0.43 | 0.82   | 0.33   | 1.09  | 86.98  | 0.44 | 185.57 | 0.63   | 793.42  | 5.47    | 2.26  | 0.8     | 18.48 | 2.35   | SHMC   |
| S12_vs_93357  | 0    | 0    | 0    | 0.35   | 0.02    | 0.31    | 0.07 | 0.21   | 0.32   | 0.13  | 0.79   | 0.08 | 0.35   | 13.65  | 0.31    | 0.97    | 0.18  | 0.16    | 0.41  | SHMC   |        |
| S12_vs_6846   | 0    | 0    | 0    | 0.64   | 0.02    | 1.82    | 0.23 | 0.26   | 0.28   | 0.39  | 1.42   | 0.08 | 0.26   | 1.04   | 30.22   | 1.3     | 0.77  | 0.82    | 1.33  | 1.76   | SHMC   |
| S12_vs_163990 | 0    | 0    | 0    | 0.79   | 0.04    | 1       | 0.21 | 0.25   | 0.19   | 0.88  | 117.21 | 0.31 | 0.44   | 22.06  | 120.28  | 0.32    | 0.26  | 32.49   | 0.97  | 1.1    | Shared |
| S12_vs_164056 | 0.04 | 0    | 0.01 | 5.79   | 0.04    | 1.2     | 0.11 | 4.79   | 0.73   | 1.35  | 1.85   | 0.69 | 1.29   | 0.33   | 16.07   | 18.32   | 3.12  | 0.45    | 0.91  | 2.35   | Shared |
| S12_vs_141337 | 0.01 | 0    | 0    | 4.81   | 0.28    | 2.82    | 0.39 | 1.87   | 0.38   | 22.42 | 3.19   | 0.17 | 5.16   | 15.45  | 20.58   | 3.39    | 4.62  | 1.1     | 14.13 | Shared |        |
| S12_vs_70241  | 0    | 0    | 0    | 0.77   | 0       | 0.77    | 0.3  | 0.1    | 0.3    | 0.4   | 1.31   | 0.19 | 1.77   | 0.35   | 12.63   | 0.19    | 0.18  | 0.93    | 0.54  | 1.09   | SHMC   |
| S12_vs_94042  | 0    | 0    | 0.01 | 14.88  | 0.02    | 4.61    | 0.02 | 0.39   | 0.13   | 7.67  | 24.58  | 0.12 | 2.83   | 0.27   | 29.3    | 7.08    | 0.22  | 3.3     | 10.88 | 0.84   | Shared |
| S12_vs_14467  | 0.01 | 0    | 0    | 1.41   | 0.03    | 18.67   | 0.18 | 0.29   | 0.12   | 0.32  | 0.93   | 0.15 | 0.52   | 0.37   | 0.86    | 2.5     | 0.57  | 0.16    | 0.57  | 0.96   | Shared |
| S12_vs_22853  | 0    | 0    | 0    | 0.84   | 0.03    | 0.45    | 0.08 | 0.23   | 0.14   | 0.25  | 0.43   | 0.06 | 0.41   | 0.41   | 30.86   | 0.21    | 0.19  | 0.3     | 0.34  | 0.6    | SHMC   |
| S12_vs_133070 | 0.01 | 0    | 0    | 28.73  | 0.17    | 1.29    | 0.24 | 0.83   | 0.26   | 1.13  | 3.35   | 0.74 | 0.95   | 4.46   | 378.54  | 13.24   | 0.85  | 0.56    | 3.02  | 1.57   | Shared |
| S12_vs_172379 | 0.01 | 0    | 0    | 1.04   | 0.12    | 1.82    | 0.24 | 0.64   | 0.31   | 0.64  | 7.59   | 0.26 | 10.09  | 0.59   | 155.57  | 4.24    | 0.94  | 0.78    | 2.23  | 2.07   | SHMC   |
| S12_vs_14057  | 0    | 0    | 0    | 27.22  | 0.07    | 0.23    | 0.06 | 0.3    | 0.66   | 0.38  | 2.65   | 0.07 | 0.35   | 2.65   | 92.33   | 0.73    | 1.05  | 0.73    | 0.47  | 0.98   | Shared |
| S12_vs_23796  | 0.01 | 0    | 0    | 0.64   | 0.15    | 0.74    | 0.2  | 6.66   | 4.16   | 0.32  | 2.88   | 0.31 | 1.16   | 1.6    | 73.56   | 0.38    | 0.58  | 0.71    | 1.75  | 9.34   | SHMC   |
| S12_vs_32669  | 0    | 0    | 0    | 0.73   | 0.03    | 0.34    | 0.01 | 0.2    | 0.11   | 0.22  | 0.64   | 0.1  | 0.67   | 0.31   | 105.07  | 0.31    | 0.25  | 0.32    | 0.38  | 0.6    | SHMC   |
| S15_vs_2032   | 0    | 0    | 0    | 0.61   | 0.01    | 1.2     | 0.11 | 0.34   | 0.12   | 0.46  | 0.1    | 0.2  | 0.18   | 0.52   | 3.15    | 1.1     | 0.69  | 0.13    | 14.13 | Shared |        |
| S15_vs_2513   | 0    | 0    | 0    | 1.49   | 0.02    | 7.84    | 0.12 | 0.26   | 0.23   | 0.24  | 0.58   | 0.13 | 0.65   | 0.58   | 0.75    | 0.5     | 0.46  | 0.65    | 1.24  | SHMC   |        |
| S15_vs_2064   | 0    | 0.01 | 0    | 3.13   | 0.02    | 0.48    | 0.07 | 0.26   | 0.11   | 0.15  | 0.55   | 0.12 | 0.42   | 0.25   | 0.47    | 6.8     | 0.93  | 259.66  | 7.52  | 4.95   | SHMC   |
| S15_vs_153055 | 0.34 | 0.15 | 0.38 | 981.84 | 2557.69 | 4088.17 | 0.14 | 1.69   | 1.45   | 1.91  | 68.24  | 5.04 | 1.17   | 0.44   | 77.52   | 5483.36 | 3.84  | 757.13  | 2.49  | 1.09   | Shared |
| S15_vs_55639  | 0.01 | 0.02 | 0    | 0.13   | 0.01    | 0.14    | 0.08 | 0.01   | 0.08   | 0.11  | 0.05   | 0.06 | 0.21   | 0.25   | 0.16    | 0.06    | 0.21  | 0.48    | SHMC  |        |        |
| S15_vs_58467  | 0    | 0.02 | 0    | 0.87   | 0.07    | 1.72    | 0.17 | 0.83   | 0.28   | 0.29  | 1.01   | 0.2  | 2.44   | 0.58   | 1.22    | 0.87    | 1.01  | 140.55  | 0.81  | 1.22   | SHMC   |
| S15_vs_71616  | 0    | 0.04 | 0    | 0.87   | 0.01    | 0.61    | 0.07 | 0.23   | 0.12   | 0     |        |      |        |        |         |         |       |         |       |        |        |

|                   |       |      |      |       |       |         |          |         |         |        |       |        |      |       |        |       |          |       |        |       |        |        |
|-------------------|-------|------|------|-------|-------|---------|----------|---------|---------|--------|-------|--------|------|-------|--------|-------|----------|-------|--------|-------|--------|--------|
| S4_vt_VIRSorter_3 | 0     | 0    | 0    | 3.01  | 0.11  | 1.18    | 24.04    | 0.9     | 0.52    | 0.32   | 0.79  | 0.37   | 1.83 | 31.86 | 0.61   | 0.42  | 1.65     | 1.64  | 1.31   | 4.85  | Shared |        |
| S4_vt_VIRSorter_0 | 0.09  | 0.01 | 0.08 | 44.34 | 32.83 | 1215.41 | 9554.46  | 561.71  | 904.83  | 183.55 | 4.67  | 1.57   | 1.5  | 21.58 | 0.62   | 1.71  | 0.24     | 0.23  | 3.24   | 0.55  | Shared |        |
| S4_vt_VIRSorter_3 | 0     | 0    | 0    | 0.91  | 0.04  | 5.06    | 47.9     | 0.35    | 0.18    | 1.15   | 0.66  | 0.46   | 0.69 | 1.02  | 0.37   | 0.28  | 0.37     | 0.41  | 1.33   | 1.39  | SHMC   |        |
| S4_vt_VIRSorter_3 | 0.021 | 0    | 0    | 14.18 | 4.01  | 12.56   | 32.36    | 73.62   | 0.44    | 60.41  | 25.06 | 328.01 | 3.56 | 0.95  | 119.35 | 5.32  | 5291.67  | 21.52 | 196.81 | 15.42 | Shared |        |
| S4_vt_VIRSorter_9 | 1     | 0    | 0.7  | 6.37  | 1.17  | 7413.04 | 758      | 269.92  | 404.13  | 4.81   | 2.62  | 10     | 0.93 | 1.34  | 0.41   | 1.34  | 0.73     | 0.37  | 1.05   | 2.35  | Shared |        |
| S4_vt_VIRSorter_1 | 0     | 0    | 0.72 | 0.41  | 70.7  | 0.51    | 0.49     | 0.2     | 0.18    | 1.15   | 0.4   | 0.2    | 0.07 | 0.41  | 0.23   | 1.56  | 0.34     | 0.41  | 1.23   | SHMC  |        |        |
| S4_vt_VIRSorter_3 | 0.01  | 0    | 0    | 1.19  | 0.31  | 5.91    | 115.6    | 2.8     | 2.25    | 3.6    | 6.29  | 2.35   | 0.4  | 4.15  | 1.36   | 0.52  | 142.76   | 0.43  | 1.36   | 2.16  | Shared |        |
| S4_vt_VIRSorter_3 | 0     | 0    | 0    | 5.54  | 0.36  | 3.44    | 33.68    | 5.93    | 0.27    | 3.94   | 3.47  | 0.51   | 1.04 | 8.88  | 2.26   | 1.53  | 20.92    | 1.74  | 30.8   | 6.49  | Shared |        |
| S4_vt_VIRSorter_3 | 0     | 0    | 0    | 1     | 0.01  | 0.7     | 85.36    | 0.1     | 0.13    | 1.23   | 0.89  | 0.09   | 0.5  | 0.53  | 0.32   | 0.28  | 0.31     | 0.2   | 0.81   | 0.89  | SHMC   |        |
| S4_vt_VIRSorter_7 | 0.01  | 0    | 0    | 1.02  | 2.86  | 1.11    | 206.57   | 10.98   | 9.24    | 89.57  | 0.51  | 1.87   | 0.42 | 1.07  | 0.46   | 0.31  | 0.41     | 0.01  | 0.65   | 4.92  | 6.68   | Shared |
| S4_vt_VIRSorter_3 | 0     | 0    | 0    | 1.37  | 0.11  | 0.43    | 24.12    | 4.43    | 0.09    | 0.18   | 0.46  | 0.1    | 0.32 | 0.42  | 0.2    | 0.41  | 4.03     | 0.22  | 0.25   | 0.53  | SHMC   |        |
| S4_vt_VIRSorter_2 | 0     | 0    | 0    | 1.96  | 0.03  | 1.22    | 28.11    | 0.26    | 0.09    | 0.16   | 0.61  | 0.11   | 0.73 | 0.15  | 0.38   | 0.32  | 0.2      | 0.19  | 0.24   | 0.84  | SHMC   |        |
| S4_vt_VIRSorter_3 | 0.01  | 0    | 0    | 0.15  | 0.01  | 46.88   | 0.18     | 0.11    | 0.19    | 0.11   | 0.09  | 0.2    | 0.44 | 0.09  | 0.2    | 15.77 | 15.09    | 0.21  | 0.83   | 0.03  | 0.4    | Shared |
| S4_vt_VIRSorter_3 | 0     | 0    | 0    | 0.87  | 0.03  | 0.2     | 21.16    | 0.19    | 0.05    | 0.12   | 9.17  | 0.06   | 0.29 | 0.13  | 0.25   | 3.91  | 0.14     | 0.2   | 0.21   | 0.33  | SHMC   |        |
| S4_vt_VIRSorter_1 | 0.04  | 0    | 0.04 | 9.31  | 0.07  | 359.34  | 13896.79 | 0.18    | 0.16    | 0.17   | 0.39  | 0.58   | 0.37 | 0.15  | 0.3    | 0.32  | 0.27     | 0.21  | 0.31   | 0.61  | Shared |        |
| S4_vt_VIRSorter_3 | 0     | 0    | 0    | 1.6   | 0.05  | 0.35    | 387.45   | 11.82   | 2.67    | 2.06   | 1.45  | 0.5    | 0.41 | 57.75 | 0.45   | 28.91 | 2.74     | 0.62  | 9.62   | 1.46  | Shared |        |
| S4_vt_VIRSorter_2 | 0.03  | 0    | 0.01 | 10.57 | 0.17  | 87.35   | 35.89    | 0.45    | 0.15    | 0.32   | 1.69  | 2.2    | 1.27 | 0.42  | 1.52   | 3.55  | 41.43    | 1.41  | 1.05   | 1.93  | Shared |        |
| S4_vt_VIRSorter_4 | 0     | 0    | 0    | 0.85  | 0.03  | 0.47    | 60.32    | 1.81    | 1.9     | 0.17   | 8.2   | 0.13   | 2.97 | 0.37  | 1.21   | 0.59  | 1.2      | 0.39  | 0.92   | 0.77  | SHMC   |        |
| S4_vt_VIRSorter_8 | 0.02  | 0    | 0    | 1.17  | 15.98 | 51.46   | 21.52    | 1       | 0.18    | 2.59   | 0.97  | 0.19   | 1.46 | 0.15  | 145.84 | 7.03  | 1.16     | 0.2   | 0.65   | 0.87  | Shared |        |
| S4_vt_VIRSorter_1 | 0.01  | 0    | 0    | 1.05  | 0.04  | 0.63    | 10.25    | 1.03    | 0.43    | 6.39   | 6.59  | 0.32   | 0.24 | 0.62  | 0.33   | 0.71  | 163.53   | 0.54  | 1.92   | 3.3   | Shared |        |
| S4_vt_VIRSorter_1 | 0.1   | 0    | 0.02 | 1.11  | 0.03  | 157.63  | 243.84   | 0.43    | 0.19    | 0.15   | 0.67  | 0.29   | 0.26 | 0.1   | 0.29   | 0.39  | 0.21     | 0.27  | 0.42   | 0.72  | Shared |        |
| S4_vt_VIRSorter_2 | 0     | 0    | 0    | 0.61  | 0.02  | 3.84    | 65.84    | 0.29    | 0.18    | 0.25   | 0.46  | 0.15   | 0.5  | 0.19  | 0.44   | 0.3   | 0.39     | 0.3   | 0.39   | 0.89  | SHMC   |        |
| S4_vt_VIRSorter_5 | 0.01  | 0    | 0.01 | 0.37  | 0.03  | 2.3     | 166.52   | 0.22    | 0.1     | 2.3    | 1.21  | 0.06   | 0.5  | 0.23  | 0.25   | 0.39  | 0.71     | 0.25  | 0.46   | 0.55  | SHMC   |        |
| S4_vt_VIRSorter_1 | 0     | 0    | 0    | 1.41  | 0.04  | 1.48    | 34.5     | 0.27    | 0.21    | 0.31   | 0.57  | 0.09   | 0.45 | 0.71  | 0.32   | 0.4   | 0.41     | 0.34  | 0.63   | 1.47  | SHMC   |        |
| S4_vt_VIRSorter_1 | 0.01  | 0    | 0    | 0.78  | 0.14  | 0.39    | 56       | 0.37    | 0.19    | 0.16   | 1.83  | 1.97   | 0.32 | 0.29  | 0.27   | 0.4   | 0.38     | 1.15  | 0.21   | 0.63  | 0.54   | SHMC   |
| S4_vt_VIRSorter_4 | 0.01  | 0    | 0    | 0.93  | 0.9   | 4.87    | 11.43    | 1.11    | 0.3     | 1.36   | 16.59 | 0.9    | 1.62 | 37.78 | 4.06   | 0.59  | 1.56     | 0.26  | 0.72   | 9.49  | Shared |        |
| S4_vt_VIRSorter_1 | 0     | 0.01 | 0    | 2.82  | 0.06  | 0.64    | 29.13    | 24.66   | 21.02   | 11.02  | 1.14  | 1.44   | 1.63 | 2.02  | 1.31   | 2.11  | 1.39     | 1.07  | 1.71   | 1.39  | 0.97   | Shared |
| S4_vt_VIRSorter_1 | 0     | 0    | 0    | 10.23 | 0.1   | 5.27    | 66.64    | 4.04    | 1.03    | 0.15   | 3.1   | 1.2    | 1.04 | 3.38  | 0.86   | 7.36  | 0.71     | 1.31  | 3.56   | 1.11  | Shared |        |
| S4_vt_VIRSorter_1 | 0     | 0.01 | 0    | 1.07  | 0.05  | 1.77    | 18.68    | 0.69    | 0.26    | 0.72   | 1.36  | 0.27   | 2.05 | 0.85  | 1.65   | 0.65  | 0.59     | 0.67  | 1.16   | 1.36  | SHMC   |        |
| S4_vt_VIRSorter_2 | 0     | 0    | 0    | 1.68  | 0.99  | 0.28    | 18.11    | 0.24    | 0.1     | 1.43   | 0.64  | 0.4    | 0.42 | 0.52  | 0.64   | 0.64  | 0.98     | 0.31  | 0.61   | 0.33  | SHMC   |        |
| S4_vt_VIRSorter_4 | 0     | 0    | 0    | 0.32  | 0     | 35.82   | 66.12    | 0.2     | 0.08    | 2.09   | 0.4   | 0.04   | 0.4  | 0.19  | 0.17   | 0.3   | 0.33     | 0.27  | 0.3    | 0.46  | Shared |        |
| S4_vt_VIRSorter_2 | 0     | 0    | 0    | 0.92  | 0.01  | 1       | 19.91    | 0.2     | 0.1     | 0.08   | 32.43 | 0.06   | 0.45 | 0.15  | 0.22   | 6.79  | 0.16     | 0.18  | 0.16   | 2.47  | SHMC   |        |
| S6_vf_27238       | 0     | 0    | 0    | 0.17  | 0.8   | 0.1     | 1421.63  | 2105.69 | 0.1     | 0.1    | 0.1   | 0.1    | 0.1  | 0.1   | 0.1    | 0.1   | 0.1      | 0.1   | 0.1    | 0.1   | 0.1    | Shared |
| S6_vf_45228       | 0     | 0    | 0    | 0.67  | 0.11  | 0.51    | 0.02     | 2.98    | 9.28    | 0.18   | 0.51  | 0.08   | 0.61 | 0.57  | 0.4    | 0.29  | 0.37     | 0.33  | 0.33   | 1.06  | SHMC   |        |
| S6_vf_45618       | 0     | 0    | 0    | 3.67  | 0.09  | 0.68    | 6.87     | 15.87   | 23.47   | 1.01   | 16.23 | 4.16   | 0.26 | 2.63  | 2.72   | 0.68  | 6.69     | 15.5  | 6.94   | 6.93  | Shared |        |
| S6_vf_24553       | 1.07  | 0    | 0.02 | 0.5   | 9.5   | 0.6     | 0        | 52.07   | 81.09   | 2.96   | 0.22  | 710.84 | 1.75 | 1.6   | 2.19   | 27.57 | 16180.59 | 1.26  | 13.67  | 1.56  | Shared |        |
| S6_vf_34315       | 0     | 0    | 0    | 0.54  | 0.12  | 743.36  | 0.12     | 318.56  | 35.84   | 38.87  | 0.1   | 0.1    | 0.1  | 0.1   | 0.1    | 0.1   | 0.1      | 0.1   | 0.1    | 0.1   | 0.1    | Shared |
| S6_vf_6314        | 0     | 0    | 0    | 0.5   | 0.78  | 1.41    | 0.06     | 223.86  | 3214.06 | 1.08   | 2.34  | 0.01   | 3.4  | 4.8   | 0.4    | 0.78  | 0.15     | 0.18  | 0.22   | 0.55  | Shared |        |
| S6_vf_25710       | 0     | 0    | 0    | 0.6   | 0.03  | 0.4     | 0.08     | 39.5    | 181.78  | 0.16   | 0.48  | 0.05   | 0.4  | 0.36  | 0.3    | 0.26  | 0.31     | 0.28  | 0.28   | 0.68  | Shared |        |
| S6_vf_56486       | 0     | 0    | 0    | 4.09  | 0.09  | 0.1     | 0.1      | 0.1     | 0.1     | 0.1    | 0.1   | 0.1    | 0.1  | 0.1   | 0.1    | 0.1   | 0.1      | 0.1   | 0.1    | 0.1   | 0.1    | Shared |
| S6_vf_56486       | 0     | 0    | 0    | 1.3   | 0.07  | 0.39    | 0.08     | 38.15   | 56.22   | 0.16   | 3.29  | 0.08   | 0.57 | 0.26  | 0.43   | 0.3   | 0.31     | 0.2   | 0.35   | 0.64  | Shared |        |
| S6_vt_32886       | 0.01  | 0    | 0    | 0.65  | 0.15  | 0.63    | 0.31     | 320.29  | 62.28   | 0.47   | 0.82  | 0.13   | 1.77 | 4.78  | 2.12   | 0.48  | 99.19    | 0.42  | 0.58   | 0.7   | Shared |        |
| S6_vt_56486       | 0     | 0    | 0    | 0.52  | 0.01  | 0.94    | 0.04     | 10.66   | 14.24   | 2.06   | 0.42  | 0.32   | 0.34 | 0.25  | 0.31   | 0.14  | 0.34     | 0.16  | 0.34   | 1.16  | Shared |        |
| S6_vt_56486       | 0     | 0    | 0    | 2.23  | 0.23  | 0.09    | 0.09     | 798.6   | 302.27  | 0.17   | 1.19  | 0.85   | 1.91 | 1.89  | 0.67   | 0.77  | 134.41   | 0.59  | 1.27   | 1.17  | Shared |        |
| S6_vt_56491       | 0     | 0    | 0    | 0.63  | 0.43  | 0.43    | 0.17     | 22.67   | 39.94   | 1.01   | 0.74  | 3.42   | 0.7  | 2     | 0.37   | 0.35  | 0.77     | 0.55  | 0.41   | 0.76  | Shared |        |
| S6_vt_56492       | 0     | 0    | 0    | 2.08  | 0.14  | 0.52    | 0.14     | 13.35   | 23.19   | 1.07   | 0.51  | 0.54   | 0.5  | 0.54  | 2.6    | 0.43  | 1.44     | 0.24  | 0.61   | 1.21  | Shared |        |
| S6_vt_56493       | 0     | 0    | 0    | 1.87  | 0.187 | 0.06    | 0.16     | 11.19   | 0.12    | 0.17   | 0.26  | 0.17   | 0.26 | 0.17  | 0.13   | 0.13  | 0.13     | 0.13  | 0.13   | 0.13  | 0.13   | Shared |
| S6_vt_56496       | 0     | 0    | 0    | 0.88  | 0.02  | 0.18    | 0.05     | 11      | 27.34   | 0.09   | 0.39  | 0.09   | 0.38 | 0.23  | 0.18   | 0.26  | 0.13     | 0.19  | 0.22   | 0.43  | Shared |        |
| S6_vt_56498       | 0     | 0    | 0    | 0.64  | 0.05  | 0.39    | 0.07     | 30.95   | 55.36   | 1.54   | 0.38  | 0.27   | 0.4  | 0.35  | 0.35   | 2.06  | 0.28     | 0.21  | 0.28   | 0.87  | Shared |        |
| S6_vt_37812       | 0     | 0    | 0    | 0.29  | 0.02  | 0.12    | 0.02     | 10.52   | 10.52   | 0.05   | 22.46 | 0.27   | 0.05 | 0.26  | 0.27   | 6.17  | 2.26     | 1.2   | 1.2    | 2.59  | Shared |        |
| S6_vt_38250       | 0     | 0    | 0    | 0.64  | 0.02  | 0.61    | 0.07     | 6.54    | 13.63   | 1.64   | 0.46  | 0.19   | 0.55 | 0.62  | 0.5    | 0.39  | 0.7      | 0.29  | 0.46   | 0.78  | SHMC   |        |
| S6_vt_9784        | 0.01  | 0.01 | 0    | 11.92 | 0.91  | 11.75   | 1.61     | 49.75   | 88.32   | 3.83   | 7.45  | 0.98   | 38.2 | 3.43  | 4.01   | 2.72  | 8.96     | 32    | 6.21   | 19.63 | Shared |        |
| S6_vt_37711       | 0.01  | 0    | 0    | 0.57  | 0.01  | 0.38    | 0.1      | 5.22    | 16.08   | 0.2    | 0.4   | 0.1    | 0.71 | 1.77  | 0.53   | 0.41  | 0.42     | 0.42  | 5.88   | 0.76  | SHMC   |        |
| S6_vt_54005       | 0.01  | 0    | 0    | 7.49  | 0.22  | 0.18    | 3.48     | 38.83   | 29.5    | 3.32   | 5.76  | 1.32   | 8.3  | 7.48  | 2.36   | 1.66  | 6.64     | 6.08  | 5.88   | 6.08  | Shared |        |
| S6_vt_29152       | 0     | 0    | 0    | 6.66  | 0.19  | 3.05    | 0.72     | 5.33    | 30.7    | 4.11   | 5.04  | 0.97   | 5.32 | 2.08  | 4.28   | 5.76  | 1.06     | 4.52  | 7.74   | 6.13  | SHMC   |        |
| S6_vt_10314       | 0     | 0    | 0    | 10.37 | 0.12  | 4.7     | 0.56     | 5.59    | 32.36   | 9.29   | 9.21  | 1.84   | 9.43 | 3.81  | 2.1    | 10.47 | 1.08     | 8.23  | 14.83  | 7.37  | Shared |        |
| S6_vt_1146        | 0.01  | 0.01 | 0.01 | 3.4   | 0.42  | 0.12    | 27.76    | 12.27   | 37.69   | 12.87  | 7.45  | 6.05   | 1.07 | 15.13 | 10.7   | 7.45  | 10.7     | 15.13 | 10.7   | 15.13 | 0.1    | Shared |
| S6_vt_46039       | 0.02  | 0    | 0    | 5.82  | 0.78  | 5.84    | 2.02     | 67.12   | 6.18    | 10.42  | 9.8   | 1.2    | 7.71 | 11.12 | 5.39   | 1.84  | 66.65    | 11.23 | 35.08  | 17.95 | Shared |        |
| S6_vt_12945       | 0.01  | 0    | 0    | 5.71  | 1.15  | 3.67    | 0.22     | 5.05    | 30.17   | 2.17   | 3.67  | 1.12   | 6.17 | 6.86  | 3.34   | 5.5   | 1.6      | 4.09  | 9.62   | 23.37 | Shared |        |
| S6_vt_34453       | 0     | 0    | 0    | 1.21  | 0.07  | 0.05    | 1.26     | 29.8    | 49.2    | 49.8   | 1.19  | 9.67   | 1.27 | 0.53  | 0.99   | 0.65  | 1.29     | 0.36  | 2.02   | 7.07  | Shared |        |
| S6_vt_13390       | 0     | 0    | 0    | 0.46  | 0.03  | 0.53    | 0.08     | 35.48   | 86.49   | 0.11   | 1.92  | 0.08   | 0.75 | 0.54  | 0.49   | 1.1   | 0.22     | 0.3   | 0.21   | 0.71  | Shared |        |
| S6_vt_38025       | 0     | 0    | 0    | 7.4   | 0.25  | 3.88    | 0.11     | 56.3    | 28.34   | 6.78   | 8.7   | 1.39   | 8.95 | 2.87  | 1.44   | 7.42  | 9.27     | 6.54  | 13.4   | 6.71  | Shared |        |
| S6_vt_46091       | 0     | 0    | 0.02 | 0.54  | 0.    |         |          |         |         |        |       |        |      |       |        |       |          |       |        |       |        |        |

|              |        |      |      |        |       |       |       |        |         |        |          |       |       |        |       |        |       |        |        |        |        |
|--------------|--------|------|------|--------|-------|-------|-------|--------|---------|--------|----------|-------|-------|--------|-------|--------|-------|--------|--------|--------|--------|
| SR_vf_41376  | 0      | 0    | 0    | 0.52   | 0.06  | 0.48  | 0.1   | 0.27   | 0.19    | 0.18   | 183.42   | 0.1   | 0.74  | 0.27   | 0.6   | 0.3    | 0.3   | 0.25   | 0.63   | 0.87   | SHHC   |
| SR_vf_7243   | 0      | 0    | 0    | 2.15   | 0.06  | 0.12  | 0.04  | 0.12   | 0.04    | 3      | 57.64    | 0.04  | 0.15  | 0.25   | 0.08  | 0.36   | 0.25  | 0.13   | 0.06   | 0.3    | SHHC   |
| SR_vf_102508 | 0      | 0    | 0    | 0.31   | 0.02  | 0.14  | 1.03  | 0.14   | 0.08    | 0.26   | 82.09    | 0.03  | 0.17  | 0.2    | 0.29  | 0.15   | 0.11  | 0.16   | 0.16   | 0.32   | SHHC   |
| SR_vf_93976  | 0      | 0    | 0    | 0.68   | 0.04  | 0.39  | 0     | 0.28   | 0.19    | 0.16   | 21.78    | 0.1   | 0.36  | 0.14   | 0.42  | 0.25   | 0.29  | 0.23   | 0.31   | 0.79   | SHHC   |
| SR_vf_111790 | 0      | 0    | 0    | 3.67   | 0.14  | 1.28  | 0.76  | 1.2    | 1.14    | 0.7    | 182.23   | 12.26 | 0.25  | 1.25   | 0.98  | 1.15   | 3.61  | 13.85  | 4.58   | 4.25   | Shared |
| SR_vf_54363  | 0      | 0    | 0    | 0.52   | 0.1   | 0.12  | 0.12  | 0.12   | 0.12    | 0.09   | 14.83    | 0.02  | 0.12  | 0.09   | 0.12  | 0.14   | 0.11  | 0.15   | 0.16   | 0.56   | SHHC   |
| SR_vf_16172  | 0      | 0    | 0    | 0.51   | 0.02  | 0.33  | 0.09  | 0.11   | 0.09    | 3.33   | 26.22    | 0.03  | 0.32  | 2.22   | 0.53  | 0.18   | 0.1   | 0.19   | 0.18   | 3.32   | SHHC   |
| SR_vf_129423 | 0      | 0    | 0    | 0.54   | 0.03  | 0.51  | 0.02  | 0.67   | 0.24    | 0.49   | 36.18    | 0.06  | 0.65  | 0.43   | 0.4   | 0.33   | 2.35  | 0.35   | 0.63   | 0.65   | SHHC   |
| SR_vf_163760 | 0      | 0    | 0    | 2.37   | 1.32  | 0.08  | 0.05  | 1.37   | 0.05    | 2.37   | 2581.73  | 0.07  | 1.02  | 0.37   | 2.54  | 0.35   | 2.21  | 3.8    | 18.5   | Shared |        |
| SR_vf_147128 | 0      | 0    | 0    | 0.71   | 0.09  | 0.63  | 0.11  | 67.37  | 160.79  | 0.28   | 44.28    | 0.19  | 1.1   | 0.43   | 0.56  | 2.47   | 2.19  | 0.43   | 0.49   | 0.94   | Shared |
| SR_vf_173225 | 0      | 0    | 0    | 0.98   | 0.03  | 0.7   | 0.15  | 0.32   | 0.23    | 0.18   | 61.09    | 0.09  | 0.94  | 0.34   | 0.55  | 8.07   | 0.41  | 0.41   | 0.62   | 1.27   | SHHC   |
| SR_vf_147338 | 0      | 0    | 0    | 0.69   | 0.02  | 1.66  | 0.13  | 0.19   | 0.13    | 0.12   | 35.79    | 0.09  | 0.6   | 0.28   | 0.29  | 0.51   | 0.28  | 0.24   | 5.74   | 1.14   | SHHC   |
| SR_vf_208102 | 0      | 0    | 0    | 4.5    | 0.37  | 0.88  | 0.1   | 0.47   | 0.36    | 0.41   | 2503.78  | 0.1   | 0.33  | 0.18   | 3.49  | 0.93   | 0.25  | 0.24   | 0.25   | 3.8    | SHHC   |
| SR_vf_208107 | 0      | 0    | 0    | 0.92   | 0.91  | 1.67  | 0.05  | 0.96   | 1.04    | 1.04   | 7513.08  | 0.05  | 0.7   | 0.16   | 0.26  | 0.82   | 0.19  | 0.18   | 0.3    | 10.73  | Shared |
| SR_vf_52050  | 0      | 0.03 | 0    | 238.46 | 0.24  | 0.71  | 0.06  | 0.85   | 1.03    | 0.25   | 160.41   | 0.06  | 0.59  | 0.3    | 0.74  | 224.42 | 0.54  | 0.7    | 0.69   | 0.83   | Shared |
| SR_vf_208110 | 0      | 0    | 0    | 14.26  | 0.1   | 0.81  | 0.14  | 0.55   | 0.69    | 0.2    | 71.97    | 0.47  | 1.38  | 142.53 | 0.27  | 45.8   | 0.31  | 0.27   | 38.81  | 1      | Shared |
| SR_vf_208111 | 0      | 0.01 | 0    | 113.14 | 0.46  | 1.04  | 0.07  | 849.46 | 2330.71 | 0.62   | 45.62    | 0.03  | 1.22  | 3.59   | 0.18  | 21.69  | 0.21  | 0.35   | 0.2    | 0.49   | Shared |
| SR_vf_208115 | 0      | 0    | 0    | 1.3    | 0.29  | 0.81  | 0.03  | 0.43   | 0.19    | 0.14   | 722.11   | 0.14  | 0.74  | 0.08   | 0.3   | 1.29   | 0.16  | 0.3    | 0.85   | 2.77   | SHHC   |
| SR_vf_208119 | 0      | 0    | 0    | 0.4    | 0     | 1.33  | 0.6   | 0.23   | 0.15    | 6.38   | 116.57   | 0.46  | 0.21  | 0.32   | 0.67  | 0.13   | 0.33  | 0.14   | 0.46   | 0.69   | SHHC   |
| SR_vf_208120 | 0      | 0    | 0    | 0.55   | 0.08  | 0.75  | 0.27  | 0.2    | 0.26    | 0.22   | 495.83   | 0.09  | 0.44  | 36.88  | 1.47  | 0.26   | 0.2   | 0.63   | 1.61   | Shared |        |
| SR_vf_208126 | 0.01   | 0    | 0    | 0.72   | 0.07  | 0.3   | 0.1   | 0.29   | 0.1     | 0.22   | 190.78   | 0.1   | 1.51  | 1.1    | 4.24  | 0.4    | 0.27  | 0.25   | 8.76   | 0.74   | SHHC   |
| SR_vf_208146 | 0      | 0    | 0    | 0.14   | 0.03  | 0.63  | 0.21  | 0.1    | 0.06    | 0.17   | 137.23   | 0.02  | 0.57  | 0.14   | 0.11  | 0.14   | 0.2   | 0.3    | 0.86   | 0.7    | SHHC   |
| SR_vf_182238 | 0.01   | 0    | 0.01 | 36.44  | 0.25  | 94.48 | 11.27 | 2.98   | 0.46    | 23.39  | 1673.04  | 0.17  | 15.06 | 42.11  | 0.21  | 20.4   | 14.73 | 0.2    | 2.32   | 2.49   | Shared |
| SR_vf_9114   | 0      | 0    | 0    | 0.55   | 0.18  | 0.87  | 0.76  | 0.77   | 0.28    | 0.35   | 1462.33  | 0.25  | 0.61  | 0.19   | 1.41  | 0.43   | 0.52  | 0.46   | 0.44   | 2.6    | SHHC   |
| SR_vf_35308  | 0.01   | 0    | 0    | 5.99   | 0.64  | 1.03  | 0.09  | 0.79   | 0.61    | 0.76   | 4701.49  | 0.07  | 0.99  | 0.26   | 1.15  | 1.13   | 0.17  | 0.43   | 0.6    | 6.09   | SHHC   |
| SR_vf_38013  | 0      | 0    | 0    | 7.85   | 9.76  | 15.16 | 0.07  | 8.61   | 7.87    | 11.7   | 82495.66 | 0.13  | 1.93  | 0.23   | 0.38  | 6.96   | 0.17  | 0.43   | 0.26   | 107.13 | Shared |
| SR_vf_3987   | 0.01   | 0.01 | 0.59 | 0.05   | 51.28 | 0.09  | 0.38  | 0.24   | 0.18    | 160.07 | 0.18     | 18.72 | 0.14  | 6.23   | 0.35  | 0.68   | 0.36  | 0.31   | 2.58   | 7.14   | Shared |
| SR_vf_71212  | 0.01   | 0    | 0    | 1.42   | 0.14  | 0.43  | 0.06  | 0.42   | 0.24    | 0.34   | 941.1    | 0.12  | 0.82  | 0.1    | 0.42  | 0.46   | 0.26  | 0.55   | 0.54   | 1.96   | SHHC   |
| SR_vf_149700 | 0      | 0    | 0    | 6.56   | 0.32  | 16.31 | 0.66  | 30.63  | 3.35    | 9.84   | 2297.71  | 1.8   | 8.5   | 2.08   | 13.89 | 6.21   | 8.52  | 5.12   | 7.21   | 23.23  | Shared |
| SR_vf_123259 | 0      | 0    | 0    | 0.89   | 0.06  | 0.43  | 0.08  | 0.13   | 0.2     | 0.17   | 42.36    | 0.12  | 0.38  | 0.52   | 0.47  | 0.3    | 0.43  | 0.35   | 0.93   | SHHC   |        |
| SR_vf_193843 | 0      | 0    | 0    | 0.67   | 0.05  | 0.43  | 0.09  | 0.26   | 0.15    | 0.18   | 532.17   | 0.09  | 0.43  | 0.91   | 0.2   | 0.34   | 0.17  | 0.26   | 0.25   | 1.27   | SHHC   |
| SR_vf_72117  | 0      | 0    | 0    | 1.52   | 1.4   | 2.53  | 0.01  | 1.34   | 1.19    | 1.65   | 9893.41  | 0.07  | 0.53  | 0.14   | 0.31  | 0.88   | 0.26  | 0.27   | 0.29   | 13.59  | Shared |
| SR_vf_40014  | 0.01   | 0    | 0    | 1.03   | 0.35  | 0.77  | 0.14  | 0.35   | 0.17    | 1.54   | 3006.23  | 0.16  | 1.91  | 0.25   | 0.17  | 0.25   | 0.42  | 0.15   | 0.26   | 0.28   | Shared |
| SR_vf_162053 | 0      | 0    | 0    | 2.04   | 1.3   | 2.67  | 0.07  | 1.37   | 0.83    | 1.66   | 8943.74  | 0.14  | 0.54  | 0.36   | 0.87  | 1.2    | 0.28  | 0.33   | 0.52   | 11.51  | Shared |
| SR_vf_59736  | 0      | 0    | 0    | 1.08   | 0.08  | 4.66  | 0.24  | 0.5    | 0.34    | 0.4    | 135.66   | 0.37  | 1.74  | 1.19   | 1.54  | 16.7   | 0.71  | 1.11   | 1.45   | 2.5    | Shared |
| SR_vf_51368  | 0      | 0    | 0    | 0.84   | 0.05  | 0.23  | 0.02  | 0.15   | 0.1     | 0.11   | 251.81   | 0.03  | 0.21  | 0.21   | 0.34  | 0.13   | 0.11  | 0.32   | 7.22   | 0.73   | SHHC   |
| SR_vf_208103 | 0      | 0    | 0    | 0.48   | 0.08  | 0.81  | 0.05  | 0.15   | 0.11    | 0.25   | 115.44   | 0.04  | 0.25  | 0.29   | 0.64  | 0.32   | 0.31  | 0.64   | 0.31   | 0.83   | SHHC   |
| SR_vf_208113 | 0      | 0    | 0    | 1.19   | 0.11  | 0.46  | 0.03  | 0.29   | 0.16    | 0.26   | 504.67   | 0.07  | 0.28  | 0.1    | 0.51  | 0.52   | 0.24  | 0.19   | 0.62   | 1.17   | SHHC   |
| SR_vf_208114 | 0.01   | 0    | 0    | 0.69   | 0.02  | 0.4   | 0.04  | 0.22   | 0.12    | 0.18   | 119.31   | 0.07  | 0.45  | 0.12   | 0.3   | 0.2    | 0.17  | 0.24   | 0.24   | 0.69   | SHHC   |
| SR_vf_208118 | 0      | 0    | 0    | 2.17   | 0.17  | 0.11  | 0.15  | 0.11   | 0.15    | 0.16   | 40.16    | 0.12  | 0.15  | 0.16   | 0.16  | 0.16   | 0.12  | 0.1    | 0.58   | SHHC   |        |
| SR_vf_208127 | 0.01   | 0.01 | 0    | 10.51  | 0.04  | 0.26  | 0.01  | 0.28   | 0.1     | 0.19   | 27.61    | 0.06  | 1.32  | 2.05   | 5.31  | 8.08   | 0.27  | 0.26   | 0.27   | 0.53   | Shared |
| SR_vf_208129 | 0      | 0    | 0    | 0.87   | 0.02  | 0.64  | 0.09  | 0.33   | 0.16    | 0.21   | 33.99    | 0.13  | 0.45  | 0.74   | 0.44  | 0.43   | 0.48  | 0.3    | 0.5    | 1.21   | SHHC   |
| SR_vf_147670 | 0      | 0    | 0    | 0.42   | 0.01  | 0.36  | 0.04  | 0.35   | 0.08    | 0.12   | 19.15    | 0.06  | 0.38  | 0.11   | 0.22  | 2.44   | 0.22  | 0.21   | 0.24   | 0.63   | SHHC   |
| SR_vf_111059 | 0      | 0    | 0    | 0.71   | 0     | 0.16  | 0.42  | 0.11   | 0.05    | 0.04   | 16.32    | 0.03  | 0.1   | 0.02   | 0.15  | 0.44   | 0.06  | 0.2    | 0.34   | 0.36   | SHHC   |
| SR_vf_182331 | 0      | 0.04 | 0    | 80.63  | 0.07  | 0.64  | 0.05  | 20.4   | 29.42   | 0.18   | 26.5     | 0.1   | 0.74  | 0.51   | 0.38  | 23.85  | 0.19  | 0.34   | 0.42   | 0.58   | Shared |
| SR_vf_147697 | 0.01   | 0    | 0    | 0.88   | 1.55  | 14.17 | 0.81  | 20.57  | 29.77   | 2.61   | 59.46    | 1.57  | 15.22 | 2.61   | 9.22  | 3.13   | 40.43 | 40.23  | 47.64  | 1.49   | Shared |
| SR_vf_179961 | 0.01   | 0    | 0    | 0.9    | 0.15  | 11.98 | 0.14  | 0.35   | 0.14    | 0.21   | 127.79   | 0.17  | 0.97  | 0.57   | 1.31  | 0.46   | 0.6   | 0.34   | 0.49   | 1.11   | Shared |
| SR_vf_193991 | 0      | 0    | 0    | 1.71   | 1.1   | 1.16  | 0.17  | 0.33   | 0.16    | 39.44  | 20.42    | 0.2   | 0.45  | 2.91   | 4.21  | 0.37   | 1.45  | 0.31   | 1.06   | 0.92   | Shared |
| SR_vf_148899 | 0      | 0    | 0    | 0.75   | 0.05  | 0.32  | 0.7   | 0.21   | 0.18    | 0.15   | 110.53   | 0.07  | 0.31  | 0.11   | 0.32  | 0.25   | 0.18  | 0.33   | 0.29   | 0.71   | SHHC   |
| SR_vf_175235 | 0      | 0    | 0    | 0.47   | 0.05  | 0.29  | 0.05  | 0.27   | 0.17    | 0.16   | 380.47   | 0.11  | 0.19  | 0.14   | 0.28  | 0.24   | 0.2   | 0.18   | 0.22   | 1.14   | SHHC   |
| SR_vf_54183  | 0.01   | 0    | 0.01 | 7.16   | 0.06  | 1.22  | 0.2   | 1.27   | 0.2     | 0.8    | 58.27    | 0.3   | 0.71  | 0.47   | 0.98  | 1.75   | 0.8   | 0.66   | 1.39   | 1.05   | SHHC   |
| SR_vf_28311  | 0      | 0    | 0    | 0.93   | 0.65  | 25.08 | 0.3   | 0.53   | 0.19    | 1.63   | 20.79    | 0.13  | 0.78  | 1.24   | 2.61  | 2.23   | 21.04 | 0.31   | 2.74   | 8.31   | Shared |
| SR_vf_132472 | 0      | 0    | 0    | 3.31   | 0.05  | 1.15  | 0.13  | 0.94   | 0.17    | 0.23   | 32.76    | 0.84  | 1.66  | 0.87   | 0.98  | 2.88   | 0.32  | 0.86   | 0.74   | 0.87   | SHHC   |
| SR_vf_63277  | 0      | 0    | 0    | 1.22   | 0.38  | 2.93  | 0.12  | 0.26   | 0.12    | 1.96   | 34.25    | 0.12  | 1.26  | 0.17   | 0.81  | 0.41   | 0.27  | 0.42   | 2.17   | 3.08   | SHHC   |
| SR_vf_176604 | 0      | 0    | 0    | 6.81   | 0.04  | 4.39  | 0.04  | 0.15   | 0.1     | 0.08   | 122.61   | 0.08  | 5.59  | 0.14   | 2.17  | 4.51   | 0.12  | 0.2    | 0.61   | 0.48   | SHHC   |
| SR_vf_176720 | 0      | 0    | 0.01 | 0.99   | 0.04  | 0.24  | 0.14  | 0.41   | 0.14    | 0.13   | 45.23    | 0.13  | 0.31  | 0.31   | 0.37  | 0.61   | 0.37  | 0.27   | 0.35   | 0.57   | SHHC   |
| SR_vf_142097 | 0      | 0    | 0    | 0.48   | 0.19  | 1.16  | 0.15  | 0.54   | 0.29    | 0.35   | 994.21   | 0.17  | 0.49  | 0.54   | 0.81  | 0.29   | 0.36  | 0.5    | 0.37   | 1.91   | SHHC   |
| SR_vf_3224   | 0      | 0    | 0    | 0.51   | 0.04  | 0.31  | 0.1   | 0.28   | 0.13    | 0.18   | 27.37    | 0.11  | 0.81  | 0.24   | 0.46  | 0.37   | 0.25  | 0.32   | 0.38   | 0.82   | SHHC   |
| SR_vf_115958 | 0      | 0    | 0    | 1.47   | 0.27  | 1.63  | 0.19  | 3.44   | 0.37    | 2.6    | 123.17   | 33.93 | 1.3   | 14.11  | 2.02  | 1.11   | 2.74  | 0.44   | 1.32   | 1.75   | Shared |
| SR_vf_18041  | 0      | 0    | 0    | 5.49   | 0.46  | 0.61  | 0.48  | 0.89   | 0.18    | 10.88  | 69.21    | 0.23  | 2.33  | 0.37   | 5.25  | 5.04   | 1.65  | 1.12   | 0.95   | 1.67   | Shared |
| SR_vf_95962  | 0.27   | 0.06 | 0    | 242.33 | 0.1   | 83.99 | 16.89 | 0.97   | 0.67    | 12.81  | 49.36    | 0.5   | 2.03  | 131.64 | 24.72 | 60.02  | 1.17  | 319.91 | 173.27 | 112.53 | Shared |
| SR_vf_125717 | 0.01   | 0    | 0.01 | 6.09   | 0.16  | 3.12  | 0.3   | 9.76   | 1.17    | 2.19   | 371.03   | 1.11  | 6.5   | 1.37   | 16.91 | 15.47  | 8.3   | 2.46   | 1.63   | 2.72   | Shared |
| SR_vf_4153   | 0.05</ |      |      |        |       |       |       |        |         |        |          |       |       |        |       |        |       |        |        |        |        |

Table S1-7. WMS\_avg\_cov

| vOTUs                   | S1_wms_ME | S2_wms_SHHC | S3_wms_ME | S4_wms_SHHC | S5_wms_ME | S6_wms_SHHC | S7_wms_ME | S8_wms_SHHC | S9_wms_ME | S11_wms_ME | S12_wms_SHHC | S17_wms_ME | Status |
|-------------------------|-----------|-------------|-----------|-------------|-----------|-------------|-----------|-------------|-----------|------------|--------------|------------|--------|
| S9-wms-combined_27311   | 0.88      | 0.82        | 0.11      | 0.31        | 1.16      | 0.2         | 0.76      | 0.89        | 15.21     | 0.46       | 1.15         | 0.62       | ME     |
| S9-wms-combined_64277   | 2.1       | 1.02        | 0.23      | 0.36        | 2.2       | 0.25        | 2.57      | 0.73        | 130.53    | 0.51       | 1.31         | 0.94       | ME     |
| S9-wms-combined_10990   | 17.51     | 57.54       | 1.45      | 8.53        | 12.84     | 5.41        | 30.03     | 6.66        | 151.11    | 6.96       | 24.21        | 17.38      | Shared |
| S9-wms-combined_53991   | 28.18     | 24.59       | 0.09      | 0.72        | 2.81      | 5.09        | 37.75     | 0.74        | 65.91     | 0.56       | 1.16         | 13.93      | Shared |
| S9-wms-combined_97755   | 7.8       | 8.83        | 0.72      | 1.77        | 4.07      | 1.2         | 3.26      | 3.45        | 93.72     | 5.09       | 3.65         | 3.04       | ME     |
| S9-wms-combined_33230   | 33.59     | 70.71       | 1.95      | 7.52        | 61.22     | 3.44        | 43.15     | 14.97       | 277.62    | 13.51      | 26.2         | 22.79      | Shared |
| S9-wms-combined_2042    | 4.48      | 6.65        | 0.49      | 1.22        | 3.4       | 1.1         | 2.69      | 3.25        | 98.02     | 3.11       | 3.38         | 2.29       | ME     |
| S9-wms-combined_124857  | 35.21     | 50.02       | 3.13      | 4.12        | 39.54     | 27.05       | 12.9      | 31.53       | 61.99     | 41.14      | 25.04        | 139.45     | Shared |
| S9-wms-combined_28805   | 8.88      | 7.24        | 0.19      | 1.73        | 3.67      | 1.33        | 6.54      | 7.46        | 33.68     | 8.91       | 2.75         | 3.5        | ME     |
| S9-wms-combined_71647   | 0.82      | 1.8         | 0.06      | 0.79        | 1.22      | 0.16        | 1.64      | 0.44        | 16.7      | 0.36       | 0.72         | 0.48       | ME     |
| S9-wms-combined_93232   | 1.06      | 0.99        | 0.06      | 0.42        | 1.37      | 0.19        | 1.06      | 0.63        | 22.09     | 0.82       | 0.81         | 0.58       | ME     |
| S9-wms-combined_109322  | 13.34     | 25.83       | 1.02      | 8           | 4.05      | 7.85        | 19.06     | 4.43        | 151.24    | 3.49       | 6.45         | 13.13      | Shared |
| S9-wms-combined_3461    | 1.2       | 1.55        | 0.11      | 0.39        | 1.17      | 0.37        | 1.51      | 0.85        | 15.71     | 0.38       | 1.17         | 0.82       | ME     |
| S9-wms-combined_29611   | 33.41     | 39.63       | 3.03      | 3.9         | 31.36     | 21.19       | 13.8      | 24.3        | 50.12     | 34.52      | 22.07        | 113.99     | Shared |
| S9-wms-combined_25007   | 6.76      | 7.85        | 0.4       | 1.21        | 11.39     | 1.41        | 14.72     | 3.18        | 27.45     | 10.82      | 3.53         | 4.29       | ME     |
| S9-wms-combined_3878    | 0.31      | 0.7         | 0.03      | 0.27        | 0.34      | 0.05        | 0.53      | 0.32        | 24.59     | 0.18       | 0.72         | 0.34       | ME     |
| S9-wms-combined_89249   | 6.69      | 1.71        | 0.26      | 1.1         | 1.04      | 0.37        | 2.95      | 0.75        | 15.4      | 1.5        | 2.87         | 3.17       | ME     |
| S9-wms-combined_105462  | 1.65      | 3.79        | 0.16      | 1.46        | 1.29      | 0.62        | 1.9       | 0.67        | 33.54     | 0.53       | 5.87         | 1.44       | ME     |
| S9-wms-combined_20485   | 3.85      | 4.93        | 0.13      | 2.35        | 3.77      | 0.24        | 2.26      | 0.76        | 59.95     | 0.51       | 0.82         | 2.94       | ME     |
| S9-wms-combined_9931    | 3.17      | 4.91        | 0.2       | 1.25        | 6.02      | 0.94        | 3.64      | 15.44       | 116.02    | 1.07       | 2.26         | 1.19       | Shared |
| S9-wms-combined_36459   | 0.82      | 0.86        | 0.05      | 0.5         | 1.14      | 2.7         | 0.92      | 0.78        | 16.07     | 0.39       | 0.92         | 0.64       | ME     |
| S9-wms-combined_105822  | 1.52      | 1.62        | 0.51      | 0.67        | 1.64      | 0.54        | 2.63      | 0.89        | 36.66     | 1.6        | 1.17         | 2.02       | ME     |
| S9-wms-combined_26410   | 3.18      | 2.92        | 0.12      | 0.92        | 1.34      | 1.21        | 1.56      | 0.83        | 29.97     | 1.01       | 2.75         | 1.3        | ME     |
| S9-wms-combined_31456   | 11.35     | 4.16        | 0.53      | 2.46        | 39.66     | 5.04        | 29.1      | 7.3         | 165.36    | 5.08       | 12.84        | 9.03       | Shared |
| S9-wms-combined_37587   | 16.93     | 40.38       | 0.95      | 6.61        | 29.05     | 2.39        | 17.03     | 5.97        | 289.89    | 5.26       | 18.45        | 10.28      | Shared |
| S9-wms-combined_5526    | 135.59    | 50.51       | 3.16      | 2.28        | 275.21    | 163.01      | 89.43     | 86.71       | 313.82    | 102.89     | 107.44       | 29.54      | Shared |
| S9-wms-combined_33229   | 0.83      | 0.74        | 0.18      | 0.51        | 0.69      | 0.16        | 1.05      | 0.37        | 296.16    | 0.22       | 1.06         | 0.48       | ME     |
| S9-wms-combined_76274   | 6.5       | 1.94        | 8.31      | 13.41       | 32.05     | 26          | 8.69      | 2.56        | 98.67     | 1.28       | 2.38         | 4.51       | Shared |
| S9-wms-combined_44402   | 20.19     | 26.47       | 0.24      | 0.6         | 2.05      | 0.16        | 1.05      | 0.45        | 382.37    | 0.71       | 1.59         | 0.74       | Shared |
| S9-wms-combined_56773   | 0.73      | 2.51        | 0.18      | 1.2         | 0.58      | 0.21        | 1.02      | 0.41        | 147.32    | 0.2        | 0.81         | 0.84       | ME     |
| S9-wms-combined_122742  | 58.05     | 28.66       | 5.84      | 2.85        | 99.4      | 33.42       | 6.72      | 23.2        | 75.29     | 21.13      | 35.02        | 16.88      | Shared |
| S9-wms_64472            | 9.38      | 10.07       | 0.72      | 1.8         | 4.43      | 3.08        | 6.93      | 1.66        | 34.5      | 3.56       | 5.79         | 11.1       | Shared |
| S9-wms_104169           | 1.13      | 1.55        | 0.09      | 0.42        | 3.55      | 0.52        | 0.29      | 0.54        | 17.23     | 0.62       | 0.26         | 0.22       | ME     |
| S9-wms_19025            | 0.33      | 0.79        | 0.04      | 0.48        | 0.39      | 0.08        | 0.62      | 0.19        | 25.74     | 0.14       | 0.44         | 0.22       | ME     |
| S9-wms_114971           | 0.45      | 0.6         | 0.04      | 0.45        | 0.41      | 0.05        | 0.53      | 0.18        | 17.95     | 0.14       | 0.33         | 0.26       | ME     |
| S9-wms_10480            | 0.55      | 0.35        | 0.06      | 0.08        | 1.31      | 0.71        | 0.24      | 1.68        | 7.31      | 0.46       | 1.47         | 0.68       | ME     |
| S9-wms_128232           | 0.52      | 1           | 0.27      | 1.41        | 0.77      | 0.22        | 0.68      | 0.47        | 26.4      | 0.19       | 0.91         | 0.32       | ME     |
| S11-wms-combined_41367  | 0.84      | 0.95        | 0.06      | 0.29        | 0.87      | 1.43        | 1.64      | 0.42        | 0.44      | 43.76      | 1.09         | 1.45       | ME     |
| S11-wms-combined_193148 | 9.1       | 1.47        | 0.16      | 0.24        | 1.63      | 60.11       | 1.38      | 2.53        | 0.89      | 76.13      | 1.85         | 1.21       | Shared |
| S11-wms-combined_179605 | 11.48     | 11.07       | 0.83      | 2.52        | 10.53     | 3.98        | 6.28      | 6.42        | 10.36     | 52.43      | 6.27         | 24.47      | Shared |
| S11-wms-combined_221310 | 1.44      | 1.06        | 0.16      | 0.34        | 2.44      | 0.65        | 9.83      | 1.74        | 0.6       | 23.55      | 1.53         | 1          | ME     |
| S11-wms-combined_14636  | 1.96      | 1.46        | 0.25      | 0.64        | 4.87      | 0.79        | 2.08      | 2.63        | 0.97      | 39.06      | 2.72         | 1.55       | ME     |
| S11-wms-combined_83571  | 0.63      | 0.83        | 0.98      | 1.96        | 114.16    | 94.59       | 21.46     | 1.44        | 1.86      | 48.46      | 12.44        | 0.86       | Shared |
| S11-wms-combined_125176 | 206.31    | 34.33       | 8.66      | 17.78       | 388.14    | 79.59       | 232.47    | 115.11      | 22.31     | 136.18     | 80.22        | 23.9       | Shared |
| S11-wms-combined_304239 | 1.54      | 1.32        | 0.19      | 0.4         | 2.38      | 0.7         | 1.61      | 1.41        | 1.01      | 44.5       | 1.54         | 1.74       | ME     |
| S11-wms-combined_194205 | 5.36      | 5.68        | 1         | 1.08        | 11.98     | 1.75        | 13.5      | 9.64        | 3.23      | 70.88      | 12.65        | 2.36       | Shared |
| S11-wms-combined_84326  | 2.19      | 1.32        | 0.2       | 7.01        | 2.53      | 0.74        | 1.26      | 2.5         | 0.77      | 53.65      | 2.01         | 1.71       | ME     |
| S11-wms-combined_236214 | 76.68     | 10.46       | 7.55      | 10.43       | 7.02      | 9.79        | 8.38      | 35.26       | 1.74      | 43.5       | 25.36        | 79.22      | Shared |
| S11-wms-combined_264050 | 38.92     | 18.29       | 3.59      | 10.15       | 11.36     | 2.98        | 14.54     | 22.33       | 3.45      | 43.84      | 22.9         | 31.05      | Shared |
| S11-wms-combined_112147 | 1.07      | 1.2         | 0.09      | 0.64        | 1.64      | 0.23        | 0.76      | 1.16        | 0.68      | 39.39      | 1.47         | 0.87       | ME     |
| S11-wms-combined_140009 | 27.63     | 8.9         | 4.44      | 9.92        | 3.67      | 2.95        | 7.92      | 16.38       | 1.66      | 61.48      | 36.71        | 97.16      | Shared |
| S11-wms-combined_168048 | 4.51      | 1.76        | 0.23      | 1.53        | 1.68      | 0.45        | 8.11      | 4.26        | 3.39      | 42.99      | 12.48        | 0.76       | Shared |
| S11-wms-combined_195425 | 5.24      | 5.39        | 0.65      | 9.55        | 1.38      | 0.39        | 1.24      | 1.11        | 0.84      | 21.05      | 1.52         | 119.63     | ME     |
| S11-wms-combined_112733 | 2.16      | 1.55        | 0.23      | 13.99       | 2.97      | 0.91        | 1.55      | 2.15        | 0.86      | 106.45     | 1.99         | 1.9        | Shared |
| S11-wms-combined_58538  | 1.08      | 0.91        | 0.09      | 0.22        | 1.3       | 0.32        | 0.66      | 1           | 0.72      | 20.43      | 0.71         | 0.79       | ME     |
| S11-wms-combined_154845 | 0.66      | 0.56        | 0.09      | 0.68        | 1.12      | 0.21        | 0.39      | 0.91        | 0.52      | 31.66      | 0.76         | 0.47       | ME     |
| S11-wms-combined_17029  | 0.82      | 0.93        | 0.08      | 0.39        | 0.91      | 0.31        | 0.75      | 0.33        | 0.51      | 103.68     | 2.97         | 1.23       | ME     |
| S11-wms-combined_3507   | 117.01    | 25.97       | 10.46     | 4.19        | 328       | 9.16        | 28.85     | 48.94       | 5.45      | 100.16     | 68.16        | 29.42      | Shared |
| S11-wms-combined_265453 | 1.41      | 1.32        | 0.05      | 0.12        | 0.7       | 1.46        | 1.04      | 0.29        | 1.55      | 10.46      | 1.02         | 1.75       | ME     |
| S11-wms-combined_320710 | 5.44      | 7.82        | 0.36      | 3.26        | 7.02      | 2.51        | 8.95      | 2.59        | 5.34      | 49.99      | 4.62         | 3.43       | ME     |
| S11-wms-combined_101337 | 3.31      | 1.52        | 0.19      | 0.49        | 1.59      | 0.97        | 6.92      | 1.81        | 1.09      | 114.79     | 11.25        | 19.65      | Shared |
| S11-wms-combined_73204  | 190.09    | 107.07      | 4.65      | 1.07        | 430.65    | 12.36       | 100.05    | 18.78       | 8.16      | 177.05     | 122.38       | 36.99      | Shared |
| S11-wms-combined_46816  | 6.46      | 30.95       | 1.27      | 14.73       | 2.15      | 0.5         | 1.33      | 21.2        | 0.65      | 56.18      | 1.72         | 1.16       | Shared |
| S11-wms-combined_226165 | 0.84      | 0.52        | 0.09      | 0.19        | 99.07     | 8.92        | 0.35      | 1.02        | 0.39      | 55.44      | 12.72        | 0.86       | Shared |
| S11-wms-combined_321938 | 48.96     | 74.68       | 2.03      | 5.24        | 23.04     | 10.54       | 66.69     | 49.16       | 1.67      | 57.85      | 39.56        | 27.22      | Shared |
| S11-wms-combined_198512 | 23.18     | 7.26        | 0.73      | 1.5         | 14.79     | 1.78        | 12.61     | 10.66       | 1.49      | 43.55      | 9.83         | 10.92      | Shared |
| S11-wms-combined_282227 | 2.41      | 4.51        | 0.28      | 1.38        | 6.45      | 0.54        | 13.05     | 1.79        | 6.8       | 20.91      | 2.63         | 2.36       | ME     |
| S11-wms-combined_267993 | 1.78      | 1.25        | 0.15      | 0.26        | 4.23      | 0.4         | 2.01      | 2.27        | 0.76      | 27.61      | 2.14         | 1.2        | ME     |
| S11-wms-combined_74983  | 2.12      | 1.21        | 0.17      | 0.72        | 2.19      | 18.72       | 14.09     | 1.03        | 0.56      | 18.95      | 96.89        | 143.89     | Shared |
| S11-wms-combined_116589 | 19.19     | 23.94       | 2.28      | 2.41        | 19.06     | 16.54       | 14.65     | 19.17       | 13.79     | 51.53      | 25.6         | 74.52      | Shared |
| S11-wms-combined_48246  | 1.9       | 1.25        | 1.24      | 1.02        | 1.2       | 1.4         | 2.03      | 9.22        | 1.26      | 85.89      | 37.53        | 0.57       | Shared |
| S11-wms-combined_283220 | 4.06      | 4.72        | 0.24      | 0.33        | 3.02      | 2.01        | 1.52      | 2.31        | 1.08      | 71.02      | 2.48         | 1.76       | ME     |
| S11-wms-combined_172889 | 1.92      | 1.11        | 24.16     | 0.56        | 1.94      | 0.53        | 9.44      | 2.65        | 1.21      | 137.2      | 1.46         | 1.77       | ME     |
| S11-wms-combined_268967 | 2.48      | 1.78        | 0.32      | 3.12        | 3.77      | 0.62        | 1.22      | 2.68        | 1.05      | 62.44      | 2.83         | 1.7        | ME     |
| S11-wms-combined_200084 | 9.02      | 0.93        | 0.14      | 0.49        | 0.9       | 0.21        | 1.23      | 0.72        | 0.99      | 27.55      | 2            | 0.68       | ME     |
| S11-wms-combined_117756 | 1.4       | 0.94        | 0.27      | 0.59        | 1.72      | 0.48        | 1.07      | 1.22        | 1.72      | 21.57      | 1.31         | 0.85       | ME     |
| S11-wms-combined_49632  | 2.31      | 2.78        | 0.43      | 0.17        | 2.03      | 2.87        | 4.21      | 1.64        | 0.9       | 31.06      | 4.11         | 7.39       | ME     |
| S11-wms-combined_63818  | 69.86     | 23.88       | 4.89      | 3.74        | 298.95    | 97.54       | 59.98     | 60.58       | 41.81     | 324.38     | 138.49       | 32.26      | Shared |
| S11-wms-combined_215723 | 291.55    | 83.24       | 2.87      | 2.18        | 183.18    | 174.54      | 103.94    | 103.06      | 100.6     | 101.52     | 92.54        | 31.27      | Shared |
| S11-wms-combined_64392  | 2.46      | 1.94        | 0.14      | 0.43        | 8.43      | 2.43        | 7.09      | 14.62       | 0.83      | 77.15      | 11.58        | 1.53       | Shared |
| S11-wms-combined_92114  | 85.13     | 37.47       | 6.97      | 3.77        | 342.54    | 115.61      | 69.82     | 69.07       | 60.4      | 143.84     | 144.77       | 71.81      | Shared |
| S11-wms-combined_119215 | 3.04      | 3.99        | 0.33      | 0.4         | 4.55      | 1.56        | 1.97      | 2.8         | 1.37      | 29.37      | 3.11         | 5.45       | ME     |
| S11-wms-combined_120257 | 17.24     | 13.23       | 2.18      | 1.51        | 27.36     | 6.5         | 6.8       | 13.6        | 3.19      | 31.82      | 11.46        | 23.69      | Shared |
| S11-wms-combined_299954 | 2.12      | 6.17        | 0.22      | 0.69        | 3.09      | 1.12        | 1.87      | 1.98        | 0.83      | 38.28      | 2.98         | 6.76       | ME     |



|                         |        |        |       |       |        |        |       |        |       |        |        |        |        |
|-------------------------|--------|--------|-------|-------|--------|--------|-------|--------|-------|--------|--------|--------|--------|
| S11-wms-combined_217790 | 87.87  | 24.33  | 2.28  | 0.73  | 184.19 | 183.26 | 65.46 | 50.73  | 64.93 | 46.56  | 41.99  | 16.13  | Shared |
| S11-wms-combined_204522 | 1.01   | 0.95   | 0.06  | 0.3   | 0.88   | 3.4    | 1.02  | 0.62   | 0.69  | 31.2   | 1.03   | 0.49   | ME     |
| S11-wms-combined_329493 | 81.49  | 50.92  | 9     | 2.81  | 68.88  | 6.5    | 18.67 | 36.5   | 3.11  | 48.06  | 29.17  | 14.07  | Shared |
| S11-wms_303398          | 3.13   | 49.74  | 0.25  | 0.42  | 2.31   | 8.41   | 3.17  | 3.66   | 0.98  | 27.4   | 3.75   | 8.71   | Shared |
| S11-wms_55610           | 1.5    | 19.96  | 0.22  | 0.67  | 1.79   | 0.5    | 3.75  | 1.74   | 0.45  | 18.05  | 1.53   | 1.58   | Shared |
| S11-wms_14390           | 2.48   | 3.11   | 0.32  | 0.81  | 2.45   | 7.96   | 4.11  | 5.34   | 0.84  | 494.02 | 5.61   | 1.4    | ME     |
| S11-wms_3116            | 50.14  | 38.44  | 7.12  | 5.48  | 5.42   | 40.93  | 7.29  | 134.78 | 3.27  | 73.94  | 56.6   | 32.22  | Shared |
| S11-wms_320555          | 0.47   | 0.85   | 0.06  | 0.39  | 0.94   | 0.14   | 0.84  | 0.52   | 0.79  | 24.92  | 0.83   | 0.43   | ME     |
| S11-wms_87293           | 0.53   | 0.9    | 0.19  | 0.64  | 0.86   | 0.18   | 0.6   | 0.47   | 0.62  | 362.52 | 0.141  | 0.4    | ME     |
| S11-wms_32691           | 0.95   | 8.43   | 0.08  | 0.43  | 1.02   | 0.24   | 0.83  | 0.69   | 0.47  | 19.82  | 1.08   | 0.49   | ME     |
| S11-wms_6203            | 0.67   | 1.68   | 0.06  | 0.59  | 1.96   | 0.24   | 1.14  | 1.16   | 2.17  | 38.97  | 0.78   | 0.39   | ME     |
| S11-wms_330479          | 0.97   | 1.15   | 2.53  | 0.32  | 1.17   | 0.17   | 0.94  | 0.73   | 0.55  | 211.64 | 0.96   | 0.67   | ME     |
| S1-wms-combined_324053  | 137.39 | 0.88   | 0.09  | 0.49  | 0.92   | 8.43   | 0.87  | 0.66   | 0.79  | 0.33   | 0.98   | 0.52   | ME     |
| S1-wms-combined_394574  | 67.22  | 850.69 | 0.59  | 4.18  | 0.83   | 2.24   | 1.22  | 0.71   | 0.73  | 0.85   | 1.28   | 0.68   | Shared |
| S1-wms-combined_394628  | 73.85  | 0.52   | 0.09  | 0.39  | 0.47   | 0.23   | 1.54  | 0.77   | 0.32  | 0.31   | 1.84   | 0.36   | ME     |
| S1-wms-combined_246923  | 24.55  | 0.61   | 0.11  | 0.52  | 0.89   | 0.65   | 0.94  | 0.89   | 0.46  | 11.71  | 9.47   | 23.95  | ME     |
| S1-wms-combined_263562  | 161.54 | 530.16 | 1.47  | 0.59  | 1.07   | 0.25   | 36.7  | 33.56  | 0.69  | 7.35   | 10.13  | 0.66   | Shared |
| S1-wms-combined_164894  | 70.03  | 2.63   | 6.79  | 3.95  | 2.84   | 0.96   | 1.86  | 2.92   | 1.01  | 1.78   | 4.5    | 2.1    | ME     |
| S1-wms-combined_231234  | 39.45  | 0.52   | 0.04  | 0.45  | 0.75   | 0.07   | 0.72  | 0.34   | 0.27  | 0.25   | 0.37   | 0.25   | ME     |
| S1-wms-combined_231411  | 37.6   | 0.95   | 0.06  | 0.76  | 1.01   | 0.28   | 0.6   | 2.81   | 0.24  | 0.49   | 1.13   | 0.77   | ME     |
| S1-wms-combined_132934  | 66.35  | 13.33  | 2.09  | 2.11  | 5.35   | 2.85   | 6.76  | 12.06  | 2.58  | 17.18  | 10.31  | 5.76   | Shared |
| S1-wms-combined_17651   | 32.66  | 10.38  | 0.69  | 1.11  | 12.38  | 0.6    | 1.49  | 4.26   | 0.71  | 2.61   | 17.77  | 3.17   | Shared |
| S1-wms-combined_313851  | 17.95  | 0.74   | 0.04  | 0.42  | 0.39   | 0.13   | 0.53  | 0.33   | 0.64  | 0.16   | 0.77   | 0.47   | ME     |
| S1-wms-combined_330329  | 41.33  | 1.21   | 0.23  | 0.64  | 0.69   | 0.16   | 0.66  | 1.23   | 0.58  | 1.54   | 0.72   | 0.64   | ME     |
| S1-wms-combined_116938  | 35.08  | 10.59  | 2.93  | 5.56  | 5.79   | 3.25   | 6.09  | 9.86   | 1.49  | 8.34   | 11.87  | 18.62  | Shared |
| S1-wms-combined_248622  | 60.56  | 71.71  | 0.47  | 1.45  | 0.42   | 0.4    | 7.16  | 0.49   | 1.09  | 0.47   | 2.2    | 9.01   | Shared |
| S1-wms-combined_100430  | 32.25  | 0.92   | 3.45  | 8.49  | 1.24   | 0.45   | 0.16  | 1.02   | 1.06  | 0.35   | 0.89   | 15.01  | ME     |
| S1-wms-combined_166392  | 49.52  | 6.16   | 2.93  | 0.64  | 2.55   | 0.47   | 4.19  | 3.94   | 0.82  | 1.07   | 1.7    | 22.11  | ME     |
| S1-wms-combined_19031   | 38.38  | 0.92   | 0.69  | 0.43  | 1.8    | 1.09   | 2.1   | 2.07   | 0.63  | 2.24   | 4.22   | 1.18   | ME     |
| S1-wms-combined_118167  | 61.2   | 1.05   | 0.37  | 0.62  | 1.82   | 11.97  | 1.55  | 1.85   | 0.68  | 0.77   | 2.41   | 1      | Shared |
| S1-wms-combined_331896  | 55.48  | 3.34   | 0.95  | 1.97  | 3.21   | 1.23   | 3.22  | 2.25   | 4.66  | 0.67   | 24.02  | 4.41   | Shared |
| S1-wms-combined_332236  | 179.6  | 10.94  | 2.46  | 2.86  | 38.85  | 3.16   | 44.43 | 8.53   | 2.9   | 49.35  | 17.77  | 5.46   | Shared |
| S1-wms-combined_151708  | 36.81  | 1.66   | 0.6   | 0.82  | 1.74   | 0.27   | 1.4   | 9.53   | 0.92  | 0.46   | 2.27   | 1.44   | ME     |
| S1-wms-combined_52643   | 27.33  | 13.95  | 0.08  | 0.48  | 1.34   | 0.24   | 0.86  | 0.91   | 0.8   | 0.52   | 1.07   | 1      | Shared |
| S1-wms-combined_52708   | 210.91 | 129.55 | 16.07 | 28.68 | 11.15  | 18.8   | 16.15 | 97.75  | 3.57  | 67.73  | 64.59  | 203.77 | Shared |
| S1-wms-combined_185336  | 36.86  | 1.61   | 0.34  | 0.27  | 2.63   | 0.13   | 4.81  | 1.73   | 0.32  | 0.32   | 1.26   | 0.26   | ME     |
| S1-wms-combined_68998   | 49.4   | 2.75   | 0.98  | 1.85  | 1.66   | 0.83   | 3.21  | 2.1    | 0.9   | 1.01   | 3.65   | 2.44   | ME     |
| S1-wms-combined_102801  | 42.57  | 62.59  | 1.59  | 0.84  | 8.43   | 1.77   | 12.26 | 7.15   | 9.23  | 37.13  | 41     | 24.01  | Shared |
| S1-wms-combined_120533  | 53.35  | 4.76   | 1.68  | 2.55  | 2.64   | 2.34   | 5.16  | 50.74  | 3.26  | 5.23   | 15.95  | 8.29   | Shared |
| S1-wms-combined_252439  | 19.05  | 2.6    | 0.04  | 0.12  | 0.84   | 0.12   | 0.56  | 0.85   | 0.47  | 0.47   | 1.27   | 0.64   | ME     |
| S1-wms-combined_302166  | 322.93 | 4.13   | 3.07  | 1.23  | 6.98   | 1.38   | 29.18 | 112.39 | 2.48  | 4.29   | 91.36  | 3.67   | Shared |
| S1-wms-combined_285012  | 61.82  | 3.09   | 1.53  | 1.69  | 2.68   | 0.56   | 2.47  | 42.07  | 1.78  | 1.99   | 11.92  | 1.11   | Shared |
| S1-wms-combined_186878  | 68.99  | 1.2    | 0.09  | 1.18  | 1.53   | 0.32   | 1.45  | 1      | 0.88  | 0.56   | 0.91   | 0.61   | ME     |
| S1-wms-combined_153670  | 58.04  | 0.96   | 0.07  | 0.14  | 0.88   | 0.32   | 1.53  | 0.56   | 0.48  | 0.87   | 0.59   | 0.87   | ME     |
| S1-wms-combined_351889  | 73.16  | 1.06   | 0.28  | 0.6   | 1.86   | 0.49   | 1.56  | 18.21  | 0.64  | 0.77   | 2      | 1.02   | Shared |
| S1-wms-combined_169788  | 222.7  | 1.37   | 0.24  | 0.32  | 1.24   | 3.63   | 1.16  | 1.51   | 1.14  | 0.52   | 60.14  | 1.75   | Shared |
| S1-wms-combined_220022  | 35.77  | 1.45   | 0.2   | 0.59  | 1.12   | 0.3    | 1.44  | 3.13   | 0.79  | 0.41   | 1.08   | 1.51   | ME     |
| S1-wms-combined_169879  | 25.15  | 10.68  | 0.87  | 0.48  | 0.75   | 0.33   | 1.12  | 2.15   | 1.23  | 0.34   | 6.86   | 0.82   | Shared |
| S1-wms-combined_23248   | 228.01 | 111.2  | 26.33 | 28.09 | 21.24  | 46.18  | 26.21 | 88.81  | 5.98  | 71.81  | 71.84  | 265.86 | Shared |
| S1-wms-combined_72167   | 24.04  | 1.11   | 0.22  | 0.27  | 2.74   | 1.05   | 1.15  | 2.66   | 1.04  | 1.32   | 2.11   | 1.8    | ME     |
| S1-wms-combined_40115   | 56.99  | 8.11   | 1.08  | 1.96  | 4.3    | 0.74   | 4.97  | 7.49   | 2.61  | 2      | 8.67   | 5.64   | ME     |
| S1-wms-combined_304377  | 135    | 44.35  | 9.89  | 15.86 | 6.81   | 12.05  | 14.84 | 42.54  | 2.06  | 27.1   | 35.59  | 94.97  | Shared |
| S1-wms-combined_353757  | 35.85  | 1.37   | 0.29  | 0.36  | 1.98   | 0.55   | 1.08  | 6.03   | 0.87  | 1.08   | 9.29   | 1.08   | ME     |
| S1-wms-combined_57370   | 149.94 | 12.95  | 1.65  | 2.01  | 38.58  | 6.93   | 8.01  | 38.63  | 3.24  | 10.69  | 45.61  | 12.67  | Shared |
| S1-wms-combined_354899  | 23.29  | 3.67   | 0.19  | 0.6   | 2.57   | 0.59   | 1.66  | 1.41   | 0.65  | 0.85   | 1.34   | 1.38   | ME     |
| S1-wms-combined_41369   | 16.46  | 1.36   | 0.14  | 0.32  | 1.75   | 0.47   | 1.1   | 1.63   | 0.73  | 0.84   | 1.58   | 1.05   | ME     |
| S1-wms-combined_156637  | 83.91  | 6.84   | 3.71  | 4.68  | 27.27  | 0.33   | 7.88  | 28.3   | 0.94  | 0.85   | 34.24  | 1.26   | Shared |
| S1-wms-combined_107073  | 14.45  | 9.57   | 0.06  | 0.25  | 0.49   | 0.19   | 0.89  | 0.41   | 0.48  | 0.21   | 0.61   | 0.33   | ME     |
| S1-wms-combined_107766  | 281.97 | 81.17  | 3.13  | 1.33  | 218.14 | 266.61 | 95.76 | 72.37  | 94.01 | 71.85  | 64.22  | 29.75  | Shared |
| S1-wms-combined_92523   | 48.16  | 1.59   | 0.2   | 0.73  | 2.13   | 8.12   | 1.5   | 1.99   | 1.21  | 22.93  | 8.11   | 1.95   | ME     |
| S1-wms-combined_224578  | 28.88  | 1.54   | 0.07  | 0.42  | 1.04   | 0.21   | 0.95  | 0.61   | 0.64  | 0.73   | 1.02   | 0.59   | ME     |
| S1-wms-combined_357373  | 329.29 | 1.24   | 0.34  | 0.3   | 1.59   | 0.59   | 1.46  | 0.54   | 1.38  | 0.24   | 0.59   | 2.17   | ME     |
| S1-wms-combined_373308  | 183.22 | 32.77  | 8.36  | 4.21  | 107.7  | 19.81  | 15.33 | 206.55 | 7.74  | 38.47  | 225.64 | 41.1   | Shared |
| S1-wms-combined_143459  | 40.37  | 0.96   | 0.6   | 0.5   | 2.02   | 0.75   | 5.23  | 7.17   | 0.78  | 1.66   | 1.61   | 1.06   | ME     |
| S1-wms-combined_308848  | 35.61  | 112.41 | 0.16  | 0.47  | 8.68   | 0.36   | 1.03  | 7.16   | 0.51  | 0.8    | 1.27   | 0.94   | Shared |
| S1-wms-combined_159544  | 32.19  | 1.23   | 0.26  | 0.53  | 2      | 0.55   | 2.52  | 9.04   | 0.63  | 1.94   | 1.45   | 0.77   | ME     |
| S1-wms-combined_374219  | 14.66  | 6.33   | 3.06  | 0.49  | 5.47   | 3.8    | 2.8   | 2.76   | 1.36  | 2.73   | 2.02   | 21.49  | ME     |
| S1-wms-combined_340558  | 18.09  | 0.84   | 0.25  | 0.3   | 1.47   | 0.46   | 0.83  | 0.99   | 0.75  | 0.29   | 14.41  | 0.51   | Shared |
| S1-wms-combined_227003  | 24.75  | 0.93   | 0.4   | 0.8   | 1.09   | 0.27   | 1.28  | 1.11   | 0.7   | 0.45   | 2.64   | 0.57   | ME     |
| S1-wms-combined_227917  | 42.08  | 3.58   | 1.85  | 0.65  | 2.65   | 1.18   | 3.28  | 2.13   | 1.14  | 1.3    | 2.4    | 16.6   | ME     |
| S1-wms-combined_360285  | 31.33  | 1.24   | 1.24  | 0.76  | 3.24   | 5.68   | 11.8  | 13.36  | 0.86  | 3.5    | 2.73   | 1.01   | Shared |
| S1-wms-combined_212892  | 45.4   | 1.01   | 0.03  | 0.59  | 0.38   | 0.13   | 0.55  | 0.27   | 0.65  | 0.2    | 0.82   | 0.33   | ME     |
| S1-wms-combined_131270  | 20.64  | 1.11   | 0.24  | 0.55  | 1.84   | 0.56   | 1.02  | 1.5    | 1     | 0.71   | 1.34   | 1.23   | ME     |
| S1-wms-combined_197401  | 38.77  | 135.28 | 0.43  | 0.79  | 1.52   | 0.5    | 1.19  | 1.3    | 0.83  | 0.56   | 3.23   | 1.15   | Shared |
| S1-wms-combined_279492  | 102.73 | 57.01  | 5.68  | 18.53 | 11.15  | 9.09   | 48.68 | 33.43  | 93.77 | 10.65  | 73.86  | 40.72  | Shared |
| S1-wms-combined_164485  | 63.38  | 7.77   | 4.72  | 6.19  | 12.23  | 1.93   | 4.24  | 47.32  | 1.95  | 4.66   | 22.19  | 11.99  | Shared |
| S1-wms-combined_32863   | 33.44  | 27.87  | 1.85  | 14.37 | 44.01  | 6.5    | 35.09 | 15.61  | 9.04  | 7.48   | 14.86  | 15.13  | Shared |
| S1-wms-combined_331544  | 42.49  | 4.31   | 1.99  | 1.33  | 2.41   | 0.76   | 1.03  | 1.42   | 2.1   | 0.51   | 1.33   | 10.99  | ME     |
| S1-wms-combined_85225   | 33.77  | 3.9    | 3.67  | 5.72  | 4.98   | 1.59   | 7.62  | 1.82   | 2.9   | 0.94   | 1.51   | 10.69  | ME     |
| S1-wms-combined_136097  | 88.64  | 17.94  | 5.3   | 2.5   | 18.15  | 4.73   | 6.1   | 30.77  | 3.8   | 13.88  | 24.13  | 19.88  | Shared |
| S1-wms-combined_307323  | 38.99  | 3.98   | 3.91  | 1.67  | 3.63   | 1.57   | 2.3   | 1.63   | 3.91  | 0.76   | 1.23   | 6.54   | ME     |
| S1-wms-combined_94988   | 200.49 | 16.14  | 4.65  | 3.09  | 75.76  | 10.52  | 11.19 | 90.2   | 5.2   | 19.84  | 98.07  | 15.32  | Shared |
| S1-wms_296850           | 122.94 | 2.12   | 0.9   | 1.01  | 3.35   | 1.03   | 1.63  | 27.87  | 1.21  | 1.74   | 4.52   | 2.36   | Shared |
| S1-wms_313991           | 21.9   | 8.94   | 0.09  | 0.09  | 0.66   | 0.07   | 0.35  | 0.54   | 0.35  | 0.29   | 0.34   | 0.26   | ME     |
| S1-wms_100010           | 41.79  | 12.03  | 0.13  | 0.66  | 1.99   | 1.06   | 1.89  | 2.67   | 0.63  | 1.84   | 2.81   | 1.15   | Shared |
| S1-wms_265285           | 27.87  | 2.41   | 0.48  | 0.38  | 1.62   | 0.49   | 1.5   | 5.09   | 0.76  | 4.8    | 7.25   | 1.11   | ME     |



|                        |        |        |       |       |         |        |        |        |        |        |        |        |        |
|------------------------|--------|--------|-------|-------|---------|--------|--------|--------|--------|--------|--------|--------|--------|
| S1-wms_185046          | 15.74  | 1.06   | 0.7   | 0.46  | 2.66    | 0.53   | 1.09   | 1.92   | 0.77   | 2.23   | 38.38  | 1.38   | Shared |
| S1-wms_102342          | 56.58  | 1.18   | 0.17  | 0.69  | 1.19    | 1.46   | 0.84   | 1.1    | 0.84   | 4.74   | 40.6   | 1.65   | Shared |
| S1-wms_4277            | 75.32  | 2.39   | 0.39  | 0.76  | 9.28    | 15.71  | 3.52   | 9.94   | 0.52   | 59.13  | 21.34  | 1.11   | Shared |
| S1-wms_153615          | 283.6  | 0.83   | 0.03  | 0.14  | 1.59    | 0.1    | 0.11   | 0.17   | 0.2    | 0.21   | 0.4    | 1.05   | ME     |
| S1-wms_236105          | 79.78  | 0.83   | 0.2   | 0.6   | 1.09    | 0.45   | 0.75   | 46.85  | 0.74   | 0.63   | 1.76   | 0.53   | Shared |
| S1-wms_170115          | 45.28  | 3.45   | 1.91  | 7.75  | 2.45    | 3.54   | 4.26   | 3.8    | 1.05   | 4.42   | 6.35   | 2.87   | ME     |
| S1-wms_106115          | 82.7   | 0.83   | 0.04  | 0.44  | 0.39    | 0.16   | 0.61   | 0.23   | 0.76   | 0.16   | 0.6    | 0.48   | ME     |
| S1-wms_388292          | 13.07  | 0.77   | 0.2   | 0.35  | 6.19    | 0.41   | 1.06   | 0.69   | 0.48   | 0.47   | 1.14   | 0.51   | ME     |
| S1-wms_223620          | 217.43 | 0.85   | 0.4   | 0.53  | 1.2     | 0.43   | 57.97  | 229.9  | 0.69   | 0.58   | 7.47   | 0.76   | Shared |
| S1-wms_208875          | 79.11  | 0.84   | 0.75  | 0.42  | 0.59    | 0.22   | 1.14   | 0.38   | 0.45   | 0.34   | 0.68   | 0.33   | ME     |
| S1-wms_225995          | 40.92  | 1.48   | 0.08  | 0.46  | 1.46    | 0.44   | 1.87   | 1.24   | 1.01   | 3.7    | 1.86   | 2.19   | ME     |
| S1-wms_29288           | 28.44  | 2.32   | 0.46  | 0.89  | 1.63    | 1.41   | 1.47   | 1.64   | 0.6    | 0.77   | 1.91   | 2.34   | ME     |
| S1-wms_244836          | 22.92  | 75.83  | 0.18  | 3.71  | 8.21    | 0.11   | 2.53   | 1.02   | 126.99 | 4.19   | 8.68   | 1.75   | Shared |
| S1-wms_130214          | 27.7   | 1.03   | 0.12  | 0.66  | 1.4     | 0.42   | 1.4    | 1.75   | 0.72   | 0.62   | 1.22   | 0.76   | ME     |
| S1-wms_212940          | 75.56  | 1.17   | 1.1   | 6.19  | 0.78    | 1.45   | 1.64   | 1.28   | 0.64   | 2.22   | 51.19  | 0.51   | Shared |
| S1-wms_394571          | 102.54 | 40.3   | 0.11  | 0.35  | 1.31    | 0.32   | 0.74   | 1.8    | 0.48   | 0.5    | 1.04   | 0.63   | Shared |
| S1-wms_32878           | 35.82  | 1.18   | 0.21  | 0.24  | 1.2     | 0.2    | 0.74   | 1.12   | 0.59   | 0.5    | 0.99   | 1.4    | ME     |
| S3-wms-combined_135428 | 1.42   | 0.94   | 14.82 | 0.24  | 2.36    | 0.76   | 7.5    | 3.52   | 0.58   | 0.72   | 1.46   | 1.07   | ME     |
| S3-wms-combined_73262  | 83.67  | 35.19  | 20.67 | 23.18 | 5.72    | 256.28 | 86.45  | 178.77 | 1.36   | 74.99  | 39.56  | 1.37   | Shared |
| S3-wms-combined_45305  | 181.56 | 138.03 | 46.62 | 8.15  | 12.96   | 3.04   | 95.53  | 62.1   | 1.27   | 8.57   | 11.99  | 56.34  | Shared |
| S3-wms_23958           | 4.91   | 3.22   | 18.02 | 0.56  | 1.28    | 0.81   | 1.28   | 15.41  | 0.63   | 0.63   | 47.59  | 0.83   | Shared |
| S3-wms_94494           | 1.97   | 1.13   | 17.03 | 0.72  | 2.95    | 1.25   | 5.87   | 2.09   | 1.23   | 1.19   | 2.36   | 1.61   | ME     |
| S3-wms_22744           | 24.04  | 14.73  | 15.25 | 2.22  | 3.03    | 1.71   | 4.91   | 3.3    | 0.8    | 3.79   | 45.78  | 2.76   | Shared |
| S5-wms-combined_26061  | 10.9   | 7.89   | 2.31  | 66.99 | 35.3    | 58.87  | 53.01  | 15.46  | 1.36   | 15.35  | 54.14  | 19.63  | Shared |
| S5-wms-combined_205046 | 64.47  | 73.67  | 8.09  | 8.93  | 87.5    | 58.6   | 36.88  | 48.85  | 45.58  | 56.26  | 49.54  | 184.36 | Shared |
| S5-wms-combined_18356  | 7.6    | 1.22   | 0.11  | 0.44  | 24.04   | 0.52   | 1.44   | 0.95   | 23.81  | 2.14   | 1.32   | 2.86   | ME     |
| S5-wms-combined_161191 | 22.41  | 16.75  | 3.12  | 2.59  | 41.09   | 16.65  | 14.8   | 18.5   | 6.54   | 22.8   | 14.44  | 65.17  | Shared |
| S5-wms-combined_134381 | 137.54 | 28.79  | 6.89  | 9.04  | 46.04   | 6.17   | 9.28   | 20.52  | 2.42   | 31.16  | 7.17   | 10.37  | Shared |
| S5-wms-combined_90315  | 12.53  | 14.35  | 0.68  | 2.35  | 93.35   | 7.69   | 13.81  | 16.6   | 5.06   | 16.73  | 46.71  | 9.67   | Shared |
| S5-wms-combined_134743 | 1.12   | 2.1    | 0.12  | 0.33  | 42.98   | 0.27   | 1.34   | 1.1    | 0.88   | 0.75   | 1.53   | 1.03   | ME     |
| S5-wms-combined_197186 | 1.04   | 1.46   | 0.08  | 0.21  | 28.32   | 0.22   | 1.56   | 0.71   | 0.93   | 0.3    | 0.91   | 0.61   | ME     |
| S5-wms-combined_117095 | 11.27  | 5.94   | 0.64  | 5.72  | 38.33   | 8.9    | 33.62  | 27.19  | 9.4    | 8.49   | 5.81   | 4.42   | Shared |
| S5-wms-combined_72410  | 15.99  | 12.78  | 1.83  | 1.96  | 139.03  | 15.68  | 8.58   | 13.85  | 13.34  | 17.67  | 11.06  | 16.75  | Shared |
| S5-wms-combined_206050 | 3.24   | 3.82   | 0.33  | 1.12  | 24.13   | 1.37   | 3.14   | 2.53   | 8.02   | 2.32   | 4.92   | 8.22   | ME     |
| S5-wms-combined_73301  | 1.05   | 2.64   | 0.19  | 2.8   | 15.16   | 0.27   | 2.54   | 0.4    | 0.85   | 0.44   | 1.29   | 3.85   | ME     |
| S5-wms-combined_108794 | 9.42   | 27.76  | 1.25  | 4.7   | 138.8   | 10.71  | 19.28  | 6.48   | 17.08  | 3.11   | 4.35   | 1.33   | Shared |
| S5-wms-combined_145067 | 4.87   | 3.79   | 0.71  | 1.87  | 23.09   | 26     | 3.43   | 6.91   | 3.04   | 10.48  | 2.33   | 68.83  | Shared |
| S5-wms-combined_3201   | 1.09   | 0.97   | 0.07  | 0.34  | 26.7    | 0.15   | 0.66   | 0.83   | 0.74   | 0.37   | 0.97   | 0.56   | ME     |
| S5-wms-combined_207291 | 36.25  | 95.53  | 0.95  | 2.99  | 57.11   | 2.55   | 36.84  | 33.97  | 18.28  | 7.09   | 24.57  | 11.85  | Shared |
| S5-wms-combined_29272  | 14.17  | 3.14   | 0.77  | 1.01  | 30.96   | 0.91   | 6.17   | 8.53   | 0.76   | 4.78   | 8.37   | 1.58   | ME     |
| S5-wms-combined_29447  | 14.01  | 5.77   | 0.86  | 1.82  | 114.37  | 16.78  | 11.7   | 40.76  | 6.67   | 29.83  | 34.75  | 5.98   | Shared |
| S5-wms-combined_199135 | 2      | 1.36   | 0.07  | 0.51  | 19.43   | 0.63   | 1.17   | 1.28   | 0.59   | 0.41   | 1.02   | 1.9    | ME     |
| S5-wms-combined_83370  | 30.5   | 59.51  | 1.81  | 5.09  | 77.52   | 6.85   | 45.72  | 18.19  | 37.23  | 13.93  | 19.62  | 32.48  | Shared |
| S5-wms-combined_83412  | 0.85   | 0.85   | 0.06  | 0.58  | 17.46   | 0.76   | 0.87   | 0.51   | 0.76   | 0.98   | 0.62   | 0.6    | ME     |
| S5-wms-combined_66017  | 0.74   | 1.03   | 0.09  | 0.26  | 28.04   | 0.24   | 0.72   | 0.57   | 0.87   | 0.32   | 0.72   | 0.45   | ME     |
| S5-wms-combined_66662  | 18.76  | 11.09  | 2.07  | 2.64  | 159.11  | 13.52  | 8.06   | 13.35  | 12.5   | 14.68  | 11.57  | 20.55  | Shared |
| S5-wms-combined_147993 | 1.19   | 1.18   | 0.28  | 0.4   | 50.13   | 0.19   | 0.85   | 0.5    | 1.35   | 0.21   | 0.7    | 0.48   | ME     |
| S5-wms-combined_156329 | 0.94   | 1.1    | 0.09  | 0.21  | 28.92   | 0.26   | 1.46   | 0.62   | 1.25   | 0.21   | 0.83   | 0.46   | ME     |
| S5-wms-combined_7292   | 0.69   | 1.2    | 0.07  | 0.36  | 215.01  | 10.36  | 1.23   | 0.4    | 0.29   | 0.2    | 4.49   | 0.38   | Shared |
| S5-wms-combined_59064  | 31.44  | 73.56  | 7.39  | 13.59 | 90.05   | 8.33   | 67.21  | 26.24  | 46.49  | 18.04  | 32.38  | 215.03 | Shared |
| S5-wms-combined_175145 | 0.86   | 1.12   | 0.08  | 0.57  | 19.46   | 0.26   | 0.97   | 0.61   | 0.6    | 0.77   | 0.93   | 6.06   | ME     |
| S5-wms-combined_94482  | 1.94   | 2.77   | 0.24  | 1.7   | 60.07   | 2.03   | 16.22  | 1.33   | 1.62   | 1.15   | 3.94   | 1.4    | ME     |
| S5-wms-combined_67650  | 195.25 | 13.77  | 10.17 | 11.57 | 365.17  | 135.73 | 198.24 | 136.26 | 19.76  | 171.23 | 81.6   | 15.68  | Shared |
| S5-wms-combined_94786  | 7.4    | 3.92   | 1.93  | 1.37  | 65.83   | 5.72   | 8.02   | 7.92   | 4.5    | 8.09   | 4.95   | 16.94  | ME     |
| S5-wms-combined_210959 | 84.51  | 35.3   | 5.07  | 6.9   | 1045.11 | 226.03 | 74.14  | 63.87  | 54.03  | 283.75 | 420.78 | 48.42  | Shared |
| S5-wms-combined_78434  | 2.29   | 2.58   | 0.14  | 0.51  | 28.95   | 0.58   | 1.78   | 1.47   | 0.86   | 1.6    | 2.58   | 4.95   | ME     |
| S5-wms-combined_106597 | 0.52   | 0.69   | 0.03  | 0.71  | 42.93   | 0.17   | 0.51   | 0.39   | 0.58   | 0.21   | 0.75   | 0.49   | ME     |
| S5-wms-combined_204782 | 1.7    | 1.17   | 0.07  | 0.6   | 29.93   | 1.03   | 2.59   | 0.65   | 0.69   | 1      | 1.38   | 0.64   | ME     |
| S5-wms-combined_98202  | 58.72  | 4.18   | 2.68  | 4.94  | 144.73  | 77.21  | 79.68  | 40.05  | 5.05   | 44.21  | 35.64  | 4.41   | Shared |
| S5-wms-combined_26971  | 23.03  | 3.69   | 1.21  | 3.34  | 265.61  | 7.49   | 6.53   | 26.06  | 2.19   | 9.31   | 21.77  | 5.12   | Shared |
| S5-wms-combined_178432 | 13.67  | 6.34   | 1.1   | 1.65  | 947.72  | 151.73 | 8.55   | 18.05  | 2.87   | 101.99 | 210.09 | 3.93   | Shared |
| S5-wms-combined_179241 | 132.71 | 25.84  | 10.84 | 3.83  | 593.91  | 7.1    | 46.01  | 22.14  | 1.75   | 84.76  | 48.65  | 11.81  | Shared |
| S5-wms-combined_117213 | 4.44   | 1.31   | 7.75  | 12.06 | 31.7    | 28.6   | 6.37   | 1.97   | 96.12  | 1.08   | 1.85   | 2.91   | Shared |
| S5-wms-combined_163165 | 1.42   | 8.15   | 0.1   | 0.34  | 27.36   | 0.34   | 1.11   | 3.52   | 0.54   | 13.88  | 2.14   | 0.89   | ME     |
| S5-wms-combined_39793  | 0.5    | 0.44   | 0     | 0.13  | 50.98   | 17.1   | 0.72   | 0.77   | 0.53   | 0.6    | 2.5    | 0.57   | Shared |
| S5-wms-combined_183113 | 12.02  | 5.99   | 0.48  | 0.74  | 64.48   | 7.08   | 19.6   | 7.61   | 4.35   | 5.81   | 9.77   | 3.49   | ME     |
| S5-wms-combined_52741  | 5.08   | 13.32  | 0.58  | 0.4   | 214.37  | 1.05   | 4.32   | 76.58  | 0.48   | 0.59   | 1.53   | 0.99   | Shared |
| S5-wms_62679           | 1.82   | 0.98   | 0.21  | 0.35  | 41.05   | 0.73   | 1.15   | 1.93   | 0.76   | 1.62   | 1.4    | 1.83   | ME     |
| S5-wms_10783           | 40.2   | 41.83  | 2.41  | 11.38 | 68.1    | 5.75   | 34.58  | 27.66  | 22.72  | 19.12  | 34     | 45.71  | Shared |
| S5-wms_164032          | 0.42   | 0.95   | 0.31  | 0.18  | 16.49   | 0.59   | 3.11   | 0.25   | 0.6    | 0.18   | 0.43   | 0.6    | ME     |
| S5-wms_49310           | 0.65   | 2.83   | 0.3   | 4.79  | 192.62  | 11.66  | 0.61   | 0.35   | 0.57   | 0.19   | 1.63   | 0.4    | Shared |
| S5-wms_67169           | 2.6    | 1.57   | 0.57  | 1.48  | 75.15   | 1.92   | 2.52   | 2.12   | 1.34   | 1.64   | 1.97   | 6.02   | ME     |
| S5-wms_85650           | 7.49   | 23.32  | 1     | 9.31  | 96.43   | 14.35  | 18.88  | 0.81   | 1.21   | 2.55   | 7.93   | 5.82   | Shared |
| S5-wms_210460          | 0.57   | 0.78   | 0.2   | 0.18  | 17.47   | 0.08   | 0.7    | 0.47   | 0.52   | 0.14   | 0.67   | 0.2    | ME     |
| S5-wms_94965           | 2.54   | 2      | 0.28  | 0.79  | 22.02   | 1.79   | 1.28   | 2.68   | 1.42   | 1.99   | 2.85   | 1.65   | ME     |
| S5-wms_52566           | 127.63 | 98.63  | 11.97 | 12.57 | 134.68  | 45.18  | 52.6   | 103.23 | 49.08  | 100.88 | 110.63 | 196.39 | Shared |
| S5-wms_123499          | 0.69   | 0.36   | 0.05  | 0.11  | 20.53   | 0.05   | 1.8    | 0.18   | 0.77   | 0.2    | 0.67   | 0.32   | ME     |
| S5-wms_212596          | 0.95   | 0.77   | 0.09  | 0.64  | 11.31   | 0.1    | 0.48   | 0.32   | 0.55   | 0.11   | 0.23   | 0.11   | ME     |
| S7-wms-combined_217226 | 1.07   | 1.46   | 0.07  | 0.38  | 1.53    | 0.32   | 43.87  | 0.83   | 0.63   | 0.5    | 1.28   | 0.66   | ME     |
| S7-wms-combined_139683 | 6.55   | 1.75   | 2.02  | 0.69  | 1.76    | 0.62   | 24.09  | 6.75   | 0.52   | 7.4    | 16.69  | 0.53   | Shared |
| S7-wms-combined_71592  | 0.82   | 11.21  | 3.37  | 0.42  | 0.71    | 0.24   | 55.11  | 1.63   | 1.4    | 0.26   | 7.32   | 0.48   | Shared |
| S7-wms-combined_235165 | 2.49   | 3.9    | 1.49  | 1.51  | 2.95    | 0.7    | 86.75  | 2.04   | 1.43   | 0.76   | 3.73   | 0.74   | ME     |
| S7-wms-combined_225260 | 1.06   | 1.58   | 0.07  | 0.71  | 0.96    | 0.15   | 19.09  | 0.6    | 0.89   | 0.25   | 1      | 0.69   | ME     |
| S7-wms-combined_31068  | 5.03   | 15.06  | 1.4   | 3     | 5.05    | 9.12   | 23.87  | 5.8    | 2.98   | 10.05  | 11.69  | 67.87  | Shared |
| S7-wms-combined_123085 | 16.03  | 25.89  | 1.04  | 11.47 | 4.56    | 4.4    | 50.93  | 5.48   | 87.84  | 1.51   | 5.01   | 10.38  | Shared |
| S7-wms-combined_20921  | 3.06   | 4.31   | 0.48  | 3.76  | 1.24    | 5.98   | 46.44  | 1.61   | 25.98  | 0.52   | 1.65   | 5.68   | ME     |

|                          |        |        |       |       |         |        |         |        |        |        |        |        |        |
|--------------------------|--------|--------|-------|-------|---------|--------|---------|--------|--------|--------|--------|--------|--------|
| S7-wms-combined_62119    | 356.97 | 552.92 | 22.18 | 15.03 | 337.24  | 59.16  | 1081.3  | 72.89  | 17.56  | 80.49  | 141.8  | 307.74 | Shared |
| S7-wms-combined_185016   | 24.82  | 59.93  | 1.09  | 6.55  | 42.76   | 5.17   | 50.86   | 16.11  | 1.17   | 7.38   | 8.99   | 18.58  | Shared |
| S7-wms-combined_174935   | 7.97   | 3.01   | 19.53 | 11.01 | 30.36   | 17.21  | 35.73   | 5.87   | 20.09  | 2.42   | 4.41   | 5.17   | Shared |
| S7-wms-combined_134452   | 116.78 | 6.35   | 0.84  | 1.41  | 6.35    | 0.74   | 58.32   | 35.23  | 1.44   | 3.44   | 65.99  | 1.72   | Shared |
| S7-wms-combined_134458   | 21.94  | 13.79  | 2.7   | 3.07  | 13.4    | 20.66  | 39.06   | 26.76  | 2.26   | 5.08   | 14.87  | 12.49  | Shared |
| S7-wms-combined_21693    | 6.93   | 19.59  | 0.43  | 0.75  | 0.85    | 3.8    | 26.75   | 28.82  | 0.81   | 1.2    | 23.51  | 0.92   | Shared |
| S7-wms-combined_2122     | 3.72   | 5.86   | 0.38  | 3.71  | 1.86    | 2.09   | 58.72   | 1.67   | 22.12  | 0.85   | 2.18   | 3.42   | ME     |
| S7-wms-combined_135154   | 4.04   | 7.44   | 0.67  | 7.92  | 47.7    | 8.73   | 51.96   | 4.34   | 1.49   | 2.7    | 6.56   | 13.56  | ME     |
| S7-wms-combined_156351   | 0.79   | 1.05   | 0.07  | 0.73  | 0.57    | 0.15   | 15.21   | 1.5    | 0.89   | 0.27   | 0.78   | 0.43   | ME     |
| S7-wms-combined_104872   | 56.18  | 160.88 | 0.92  | 0.66  | 4.19    | 0.12   | 27.14   | 25.59  | 0.75   | 4.06   | 1.02   | 0.68   | Shared |
| S7-wms-combined_238231   | 17.11  | 17.39  | 1.32  | 2.19  | 26.72   | 3.39   | 37.33   | 8.86   | 7.69   | 17.48  | 11.35  | 11.38  | Shared |
| S7-wms-combined_43950    | 60.15  | 79.2   | 10.07 | 23.17 | 25.64   | 191.94 | 217.49  | 159.54 | 22.91  | 79.81  | 50.41  | 31.13  | Shared |
| S7-wms-combined_84688    | 23.27  | 21.49  | 2.56  | 5.23  | 37.88   | 22.63  | 40.28   | 10.14  | 19.28  | 11.85  | 8.41   | 53.04  | Shared |
| S7-wms-combined_3669     | 0.22   | 0.7    | 0.03  | 0.19  | 2.93    | 0.05   | 8.19    | 0.4    | 0.54   | 0.37   | 0.74   | 0.36   | ME     |
| S7-wms-combined_3697     | 164.6  | 63.77  | 6.39  | 3.92  | 415.49  | 206.31 | 188.41  | 136.75 | 140.07 | 181.77 | 196.97 | 83.41  | Shared |
| S7-wms-combined_157260   | 15.62  | 7.37   | 0.72  | 12.38 | 3.75    | 1.74   | 36.68   | 2.19   | 14.61  | 1.19   | 3.17   | 6.83   | Shared |
| S7-wms-combined_74829    | 23.9   | 18.13  | 0.11  | 0.91  | 1.99    | 4.59   | 54.79   | 0.69   | 12.35  | 0.49   | 1.05   | 10.43  | Shared |
| S7-wms-combined_14267    | 271.07 | 84.02  | 4.53  | 5.15  | 405.75  | 303.54 | 323.17  | 105.8  | 176.48 | 117.28 | 111.5  | 32.68  | Shared |
| S7-wms-combined_157434   | 19.39  | 47.4   | 1.26  | 6.26  | 3.76    | 5.19   | 33.61   | 11.99  | 22.28  | 4.48   | 8.92   | 39.79  | Shared |
| S7-wms-combined_167867   | 1.63   | 1.03   | 8.88  | 0.75  | 1.72    | 0.45   | 27.72   | 1.05   | 0.72   | 0.6    | 1.31   | 1.09   | ME     |
| S7-wms-combined_106253   | 6.08   | 8.85   | 0.78  | 13.96 | 5.03    | 1.51   | 40.44   | 2.31   | 15.21  | 1.7    | 3.73   | 8.43   | Shared |
| S7-wms-combined_239784   | 45.21  | 143.6  | 0.73  | 1.27  | 6.61    | 2.67   | 383.44  | 5.92   | 0.85   | 4.37   | 12.18  | 15.23  | Shared |
| S7-wms-combined_14529    | 119.71 | 2.73   | 3.08  | 0.91  | 6.92    | 1.69   | 67.37   | 165.33 | 1.3    | 3.81   | 113.51 | 3.44   | Shared |
| S7-wms-combined_189250   | 2.02   | 1.03   | 0.37  | 0.48  | 3.13    | 0.99   | 26.1    | 16.36  | 0.86   | 1.33   | 1.72   | 1.16   | Shared |
| S7-wms-combined_137858   | 85.09  | 26.45  | 11.87 | 12.47 | 6.3     | 7.96   | 53.25   | 34.34  | 3.26   | 37.65  | 34.51  | 59.74  | Shared |
| S7-wms-combined_169375   | 1.81   | 6.09   | 0.34  | 5.93  | 24.8    | 0.97   | 120.02  | 1.12   | 153.47 | 1.22   | 1.38   | 2.2    | ME     |
| S7-wms-combined_5625     | 285.48 | 548.82 | 20.41 | 21.61 | 295.16  | 44.71  | 1137.17 | 54.16  | 22.09  | 71.61  | 118.43 | 270    | Shared |
| S7-wms-combined_190281   | 2.97   | 1.92   | 4.2   | 12.74 | 7.54    | 1.6    | 34.43   | 18.37  | 1.74   | 3.75   | 5.17   | 18.72  | Shared |
| S7-wms-combined_26217    | 163.1  | 10.19  | 9.07  | 16.58 | 229.78  | 98.62  | 294.28  | 122.42 | 15.69  | 137.3  | 68.96  | 23.78  | Shared |
| S7-wms-combined_69024    | 0.75   | 0.92   | 0.08  | 0.8   | 2.68    | 0.7    | 13.79   | 0.56   | 0.84   | 0.24   | 1.13   | 2.02   | ME     |
| S7-wms-combined_7205     | 12.43  | 29.98  | 1.42  | 1.07  | 1.97    | 7.59   | 70.59   | 3.94   | 3.94   | 6.52   | 4.57   | 2.26   | Shared |
| S7-wms-combined_121062   | 0.58   | 0.92   | 0.26  | 0.57  | 0.54    | 0.15   | 15.29   | 0.31   | 0.54   | 0.24   | 0.35   | 0.5    | ME     |
| S7-wms-combined_90393    | 0.52   | 1.45   | 0.16  | 0.35  | 0.96    | 0.34   | 152.96  | 0.39   | 0.51   | 0.32   | 0.97   | 2.43   | ME     |
| S7-wms-combined_111004   | 25.94  | 12.6   | 4.95  | 5.32  | 2.82    | 6.36   | 33.81   | 14.75  | 1.83   | 6.83   | 15.04  | 29.07  | Shared |
| S7-wms-combined_90728    | 0.7    | 1.22   | 0.03  | 0.4   | 0.79    | 0.25   | 84.78   | 0.32   | 0.86   | 0.22   | 0.71   | 3.64   | ME     |
| S7-wms-combined_40779    | 14.03  | 7.76   | 0.49  | 8.96  | 2.98    | 7.32   | 50.03   | 2.57   | 1.4    | 4.09   | 3.25   | 274.22 | ME     |
| S7-wms-combined_28138    | 1.46   | 3.31   | 0.12  | 0.8   | 16.34   | 1.65   | 33.88   | 0.78   | 1.84   | 0.58   | 1.45   | 0.48   | ME     |
| S7-wms-combined_224523   | 3.5    | 62.46  | 0.18  | 0.68  | 0.55    | 0.32   | 44.28   | 7.65   | 0.78   | 0.27   | 7.14   | 0.94   | Shared |
| S7-wms-combined_143218   | 6.78   | 3.17   | 4.32  | 4.12  | 11.72   | 4.39   | 25.37   | 3.7    | 12.6   | 0.87   | 4.15   | 3.47   | ME     |
| S7-wms-combined_163980   | 7.13   | 3.42   | 3.23  | 2.18  | 25.6    | 5.61   | 53.84   | 145.74 | 1.47   | 2.56   | 7.2    | 4.79   | ME     |
| S7-wms-combined_72070    | 50.23  | 122.56 | 2.6   | 2.35  | 73.8    | 10.15  | 1008.58 | 31.38  | 6.56   | 10.39  | 50.7   | 23.81  | Shared |
| S7-wms-combined_136642   | 6.32   | 1.49   | 3.9   | 6.17  | 6.12    | 2.8    | 37.06   | 2.32   | 7.87   | 1.03   | 1.83   | 3.74   | ME     |
| S7-wms-combined_147158   | 2.83   | 1.83   | 6.4   | 8.48  | 6.52    | 3.31   | 30.74   | 1.9    | 10.42  | 1.06   | 1.74   | 1.47   | ME     |
| S7-wms-combined_218379   | 12.28  | 7.94   | 4.73  | 7.81  | 7.81    | 1.87   | 105.24  | 15.89  | 4.66   | 9.3    | 7.2    | 5.06   | Shared |
| S7-wms-combined_107679_0 | 147.71 | 6.59   | 7.73  | 9.72  | 247.95  | 120.46 | 218.08  | 108.29 | 13.43  | 144.76 | 58.6   | 11.97  | Shared |
| S7-wms-combined_107679_1 | 61.09  | 9.86   | 1.46  | 2.29  | 191.23  | 35.76  | 267.27  | 73.09  | 6.16   | 56.58  | 28.11  | 11.66  | Shared |
| S7-wms_113137            | 6.05   | 18.23  | 3.73  | 2.35  | 4.09    | 24.15  | 32.98   | 109.66 | 2.17   | 21.77  | 34.47  | 1.13   | Shared |
| S7-wms_123954            | 0.71   | 0.5    | 0.05  | 0.51  | 0.71    | 0.14   | 22.14   | 0.94   | 0.55   | 0.25   | 9.77   | 4.83   | ME     |
| S7-wms_53338             | 0.37   | 0.46   | 0.04  | 0.11  | 0.43    | 0.08   | 37.52   | 0.46   | 0.27   | 0.19   | 0.35   | 0.32   | ME     |
| S7-wms_157264            | 0.4    | 0.33   | 0.02  | 0.18  | 0.88    | 0.37   | 337.77  | 1.53   | 0.61   | 1.26   | 0.61   | 0.32   | ME     |
| S7-wms_239833            | 0.73   | 0.77   | 0.05  | 0.54  | 0.65    | 0.18   | 62.64   | 0.79   | 0.66   | 0.32   | 0.61   | 0.39   | ME     |
| S7-wms_127801            | 7.92   | 15.3   | 3.84  | 1.05  | 3.04    | 0.77   | 48.5    | 3.31   | 2.49   | 1.48   | 8.22   | 2.29   | Shared |
| S7-wms_76437             | 0.69   | 0.72   | 0.04  | 0.46  | 0.71    | 0.15   | 34.12   | 0.47   | 0.42   | 0.22   | 0.68   | 0.39   | ME     |
| S7-wms_118607            | 2.22   | 1.81   | 0.21  | 0.46  | 1.55    | 11.91  | 53.61   | 1.21   | 0.99   | 27.04  | 12.37  | 0.92   | Shared |
| S7-wms_159432            | 5.7    | 1.03   | 3.48  | 2.38  | 0.8     | 0.28   | 70.38   | 0.67   | 1.36   | 0.26   | 1.91   | 12.24  | ME     |
| S7-wms_200936            | 9.63   | 0.77   | 0.17  | 0.58  | 0.74    | 6.77   | 14.21   | 19.13  | 0.26   | 20.98  | 4.42   | 48.81  | Shared |
| S7-wms_151112            | 0.78   | 0.87   | 0.07  | 0.35  | 0.45    | 0.22   | 46.88   | 0.41   | 0.89   | 0.18   | 0.52   | 0.37   | ME     |
| S7-wms_80255             | 0.8    | 0.71   | 0.14  | 0.22  | 0.87    | 0.17   | 15.22   | 3.78   | 0.5    | 0.5    | 5.05   | 0.64   | ME     |
| S7-wms_244425            | 0.43   | 1.02   | 0.06  | 1.61  | 0.61    | 0.38   | 126.34  | 24.01  | 26.87  | 21.98  | 0.66   | 0.41   | Shared |
| S7-wms_244866            | 2.63   | 1.29   | 0.04  | 0.36  | 0.59    | 0.2    | 36.86   | 0.36   | 0.54   | 0.13   | 0.53   | 0.32   | ME     |
| S17-wms-combined_157468  | 1.8    | 2.32   | 0.08  | 0.67  | 9.85    | 9.11   | 2.81    | 4.23   | 1.44   | 1.33   | 1.01   | 28.87  | ME     |
| S17-wms-combined_233761  | 73.12  | 108.12 | 5.91  | 1.31  | 71.91   | 9.34   | 140.11  | 5.17   | 1.01   | 12.37  | 20.48  | 127.59 | Shared |
| S17-wms-combined_56006   | 27.09  | 15.78  | 4.15  | 11.61 | 6.63    | 20.75  | 7.87    | 30.21  | 2.23   | 5.58   | 18.91  | 121.26 | Shared |
| S17-wms-combined_56061   | 41.76  | 53.97  | 6.76  | 13.09 | 13.05   | 17.62  | 11.04   | 32.53  | 5.35   | 33.54  | 26.86  | 247.28 | Shared |
| S17-wms-combined_223748  | 0.7    | 3.14   | 0.11  | 0.28  | 1.04    | 1.13   | 0.99    | 0.37   | 0.27   | 0.46   | 0.32   | 20.83  | ME     |
| S17-wms-combined_79709   | 1.88   | 3.69   | 0.19  | 0.29  | 2.93    | 1.19   | 1.96    | 1.6    | 0.8    | 2.8    | 2.01   | 35.35  | ME     |
| S17-wms-combined_146050  | 24.07  | 50.1   | 4.15  | 6.3   | 23.4    | 8.91   | 75.22   | 4.81   | 7.15   | 55.77  | 49.81  | 139.66 | Shared |
| S17-wms-combined_179363  | 2.02   | 1.43   | 1.16  | 0.15  | 2.94    | 0.27   | 1.16    | 1.65   | 3.98   | 0.6    | 1.8    | 19.18  | ME     |
| S17-wms-combined_90378   | 13.79  | 4.07   | 4.43  | 3.2   | 3.29    | 5.03   | 4.45    | 6.51   | 1.13   | 1.51   | 4.77   | 75.72  | ME     |
| S17-wms-combined_179771  | 1.43   | 3.48   | 0.27  | 0.77  | 26.92   | 3.13   | 71.86   | 4.67   | 0.78   | 1.14   | 16.93  | 99.72  | Shared |
| S17-wms-combined_2234    | 19.5   | 22.02  | 2.3   | 1.87  | 44.16   | 15.25  | 9.17    | 18.63  | 6.16   | 31.3   | 17.41  | 197.7  | Shared |
| S17-wms-combined_146850  | 3.1    | 1.26   | 0.13  | 0.21  | 2.75    | 0.42   | 1.46    | 1.48   | 0.6    | 1.32   | 2.01   | 27.47  | ME     |
| S17-wms-combined_258087  | 68.39  | 20.36  | 4.06  | 5.94  | 6.14    | 5.35   | 2.63    | 14.35  | 0.71   | 13.34  | 18.31  | 37.73  | Shared |
| S17-wms-combined_225356  | 2.32   | 0.94   | 0.37  | 0.49  | 4.69    | 1.44   | 2.19    | 2.85   | 0.81   | 11.95  | 2.29   | 17.64  | ME     |
| S17-wms-combined_136622  | 1.21   | 1.02   | 1.02  | 0.16  | 1.05    | 0.16   | 0.59    | 5.53   | 0.64   | 0.53   | 0.68   | 20.83  | ME     |
| S17-wms-combined_203701  | 108.75 | 27.36  | 40.02 | 30.35 | 1077.68 | 114.24 | 721.8   | 354.77 | 19.55  | 256.43 | 825.9  | 86.95  | Shared |
| S17-wms-combined_158354  | 2.83   | 2.75   | 0.29  | 1.13  | 0.81    | 0.35   | 22.41   | 0.45   | 0.68   | 8.29   | 3.17   | 58.7   | ME     |
| S17-wms-combined_247494  | 16.87  | 29.66  | 1.89  | 1.5   | 14.2    | 8.15   | 5.52    | 10.3   | 3.19   | 19.58  | 10.58  | 109.69 | Shared |
| S17-wms-combined_70983   | 23.39  | 38.6   | 0.74  | 1.06  | 0.42    | 0.42   | 16.78   | 0.52   | 1.12   | 1.31   | 4.38   | 28.61  | Shared |
| S17-wms-combined_126600  | 16.02  | 23.12  | 0.66  | 1.93  | 21.23   | 6.1    | 13.44   | 10.14  | 4.71   | 27.59  | 31.35  | 70.87  | Shared |
| S17-wms-combined_126774  | 28.51  | 21.33  | 4.04  | 4.53  | 62.62   | 12.92  | 15.43   | 15.8   | 6.95   | 5.68   | 14.53  | 89.36  | Shared |
| S17-wms-combined_171305  | 0.91   | 1.78   | 0.04  | 0.7   | 2.69    | 0.31   | 1.97    | 3.08   | 0.58   | 1.87   | 2.32   | 45.34  | ME     |
| S17-wms-combined_248321  | 107.06 | 9.22   | 3.22  | 10.72 | 6.82    | 7.86   | 5.36    | 34.22  | 3.49   | 9.2    | 6.63   | 135.68 | Shared |
| S17-wms-combined_193958  | 89.18  | 75.17  | 10.71 | 12.15 | 7.44    | 16.32  | 11.79   | 55.92  | 1.84   | 40.45  | 33.75  | 347.73 | Shared |
| S17-wms-combined_47860   | 1.11   | 6.85   | 0.15  | 0.64  | 1.73    | 1.25   | 1.3     | 2.17   | 0.58   | 1.45   | 1.91   | 38.86  | ME     |
| S17-wms-combined_259811  | 7.17   | 13.57  | 1.23  | 4.85  | 7.78    | 10.19  | 12.41   | 6.07   | 3.14   | 15.14  | 12.58  | 83.27  | Shared |

|                         |        |        |       |       |        |        |        |        |        |        |        |        |        |
|-------------------------|--------|--------|-------|-------|--------|--------|--------|--------|--------|--------|--------|--------|--------|
| S17-wms-combined_127688 | 27.5   | 9.16   | 4.41  | 4.37  | 3.82   | 2.27   | 38.76  | 10.4   | 10.22  | 3.15   | 16.53  | 33.03  | Shared |
| S17-wms-combined_260343 | 5.7    | 2.45   | 1.54  | 0.65  | 2.82   | 0.84   | 14.41  | 1.85   | 0.78   | 3.54   | 2.81   | 86.87  | ME     |
| S17-wms-combined_72837  | 10.43  | 4.12   | 0.73  | 3.28  | 2.28   | 0.83   | 6.71   | 5.04   | 0.73   | 3.72   | 3.9    | 26.85  | ME     |
| S17-wms-combined_16309  | 0.43   | 0.89   | 0.24  | 0.63  | 0.48   | 0.23   | 0.95   | 0.28   | 0.64   | 0.25   | 1.09   | 41.74  | ME     |
| S17-wms-combined_106262 | 4.67   | 4.41   | 0.17  | 0.71  | 2.19   | 1.04   | 4.57   | 1.62   | 0.62   | 3.23   | 2.37   | 69.61  | ME     |
| S17-wms-combined_185239 | 40.8   | 48.8   | 4.47  | 4.63  | 46.77  | 22.38  | 18.96  | 32.13  | 17.43  | 93     | 31.92  | 143.66 | Shared |
| S17-wms-combined_39687  | 2.77   | 1.63   | 0.22  | 0.51  | 2      | 8.1    | 2.74   | 6.68   | 0.65   | 3.67   | 1.7    | 18.53  | ME     |
| S17-wms-combined_140517 | 0.66   | 0.99   | 0.05  | 0.46  | 0.64   | 0.15   | 1.12   | 0.34   | 1.04   | 0.46   | 1.34   | 18.4   | ME     |
| S17-wms-combined_106940 | 102.76 | 293.64 | 4.16  | 10.91 | 60.65  | 8.19   | 117.38 | 13.12  | 4.43   | 17.34  | 36.84  | 151.68 | Shared |
| S17-wms-combined_186314 | 15.51  | 2.29   | 4.31  | 4.45  | 4.79   | 2.78   | 6.56   | 1.58   | 6.12   | 0.68   | 1.3    | 26.1   | ME     |
| S17-wms-combined_162786 | 1.5    | 1.79   | 0.11  | 0.43  | 1.27   | 0.26   | 1.55   | 0.87   | 1.48   | 0.51   | 1.81   | 74.24  | ME     |
| S17-wms-combined_95360  | 45.23  | 55.02  | 0.36  | 2.27  | 4.75   | 11.09  | 63.36  | 1.86   | 40.05  | 1.39   | 2.84   | 27.14  | Shared |
| S17-wms-combined_130215 | 16.98  | 9.92   | 1.34  | 1.51  | 14.43  | 32.22  | 9.76   | 7.89   | 5.61   | 5.05   | 9.81   | 86.19  | Shared |
| S17-wms-combined_75892  | 6.23   | 3.47   | 0.34  | 0.62  | 2.2    | 0.99   | 2.48   | 1.7    | 0.72   | 1.48   | 1.71   | 26.15  | ME     |
| S17-wms-combined_30308  | 0.77   | 1.12   | 0.04  | 0.18  | 1.02   | 0.18   | 0.49   | 0.53   | 0.92   | 0.44   | 0.62   | 13.39  | ME     |
| S17-wms-combined_175924 | 6.04   | 6.62   | 0.75  | 2.94  | 4.31   | 5.74   | 3.14   | 4.72   | 4.23   | 4.56   | 5.88   | 112.18 | ME     |
| S17-wms-combined_199440 | 64.65  | 9.55   | 3     | 1.49  | 28.53  | 8.04   | 29.93  | 10.41  | 7.3    | 13.7   | 8.17   | 55.36  | Shared |
| S17-wms-combined_199746 | 4.68   | 3.48   | 4.17  | 0.98  | 46.21  | 9.37   | 5.24   | 17.86  | 3.26   | 17.59  | 11.07  | 59.5   | Shared |
| S17-wms-combined_66123  | 7.96   | 2.09   | 0.44  | 2.1   | 1.8    | 1.95   | 5.05   | 9.51   | 1.01   | 2.61   | 1.3    | 39.96  | ME     |
| S17-wms-combined_9864   | 3.33   | 3.8    | 1.55  | 0.6   | 21.25  | 6.77   | 16.33  | 13.57  | 1.22   | 8.97   | 6.62   | 22.74  | Shared |
| S17-wms-combined_253499 | 1.02   | 0.89   | 0.09  | 0.96  | 2      | 0.52   | 1.21   | 1.02   | 0.94   | 3.25   | 1.19   | 84.49  | ME     |
| S17-wms_124308          | 0.86   | 1.28   | 0.03  | 0.73  | 0.71   | 0.25   | 4.74   | 0.4    | 0.87   | 0.21   | 0.81   | 34.03  | ME     |
| S17-wms_235536          | 1.34   | 1.67   | 0.14  | 0.83  | 0.58   | 0.42   | 0.98   | 0.22   | 4.95   | 1.7    | 1.43   | 28.56  | ME     |
| S17-wms_116248          | 9.89   | 3.51   | 1.77  | 1.53  | 2.11   | 5.51   | 2.09   | 14.81  | 0.78   | 2.97   | 11.15  | 37.17  | Shared |
| S17-wms_106671          | 2.2    | 6.34   | 0.71  | 2.19  | 2.71   | 0.57   | 1.48   | 2.8    | 3.87   | 8.5    | 5.07   | 35.81  | ME     |
| S17-wms_29082           | 8.68   | 4.79   | 2.25  | 4.36  | 7.44   | 2.05   | 4.29   | 5.37   | 3.51   | 10.65  | 5.87   | 43.84  | ME     |
| S17-wms_254872          | 0.31   | 0.36   | 0.08  | 0.24  | 0.32   | 0.17   | 0.51   | 0.47   | 0.43   | 0.08   | 0.51   | 23.97  | ME     |
| S17-wms_266511          | 0.49   | 0.58   | 0.07  | 0.5   | 0.66   | 0.12   | 0.48   | 0.4    | 0.31   | 0.3    | 0.43   | 239.77 | ME     |
| S12-wms-combined_321174 | 5.49   | 0.65   | 0.14  | 0.39  | 2.05   | 1.66   | 6.41   | 5.37   | 0.43   | 14.26  | 64.58  | 0.63   | Shared |
| S12-wms-combined_401379 | 2.05   | 0.69   | 0.05  | 0.24  | 0.84   | 0.26   | 8.74   | 0.66   | 0.79   | 0.34   | 53.45  | 0.84   | SHHC   |
| S12-wms-combined_401383 | 0.25   | 0.87   | 0     | 0.19  | 0.36   | 0.08   | 1.04   | 0.3    | 0.34   | 0.06   | 18.31  | 0.13   | SHHC   |
| S12-wms-combined_334806 | 27.49  | 12.14  | 2.39  | 1.64  | 34.01  | 8.01   | 7.28   | 20.46  | 4.85   | 16.82  | 42.22  | 25.49  | Shared |
| S12-wms-combined_184338 | 19.14  | 15.04  | 2.2   | 0.9   | 5.71   | 3.07   | 4.4    | 83.9   | 3.52   | 6.26   | 56.22  | 15.92  | Shared |
| S12-wms-combined_368462 | 6.37   | 4.21   | 0.35  | 0.72  | 5.48   | 1.48   | 5.46   | 28.56  | 1.04   | 2.64   | 46.98  | 1.58   | SHHC   |
| S12-wms-combined_385270 | 79.58  | 5.82   | 0.55  | 1.27  | 6.76   | 1.14   | 5.37   | 4.33   | 3.4    | 2.87   | 183.56 | 4.6    | Shared |
| S12-wms-combined_201125 | 25.63  | 39     | 1.78  | 14.48 | 27.7   | 6.85   | 54.47  | 7.02   | 10.75  | 12.13  | 160.23 | 30.72  | Shared |
| S12-wms-combined_368562 | 1.64   | 3.07   | 3.09  | 6.27  | 10.41  | 10.8   | 9.81   | 2.07   | 0.72   | 29.85  | 121.9  | 302.89 | Shared |
| S12-wms-combined_351847 | 37.58  | 11.42  | 0.07  | 0.79  | 0.89   | 0.15   | 1.77   | 24.26  | 1.09   | 0.45   | 48.23  | 1.03   | Shared |
| S12-wms-combined_117628 | 112.29 | 42.16  | 3.8   | 6.75  | 28.05  | 7.34   | 16.09  | 35.62  | 11.37  | 18.27  | 55.09  | 27.13  | Shared |
| S12-wms-combined_17617  | 84.11  | 10.04  | 7.27  | 3.66  | 12.07  | 8.8    | 31.73  | 15.97  | 3.77   | 11.57  | 24.76  | 25.79  | Shared |
| S12-wms-combined_51076  | 5.04   | 2.78   | 0.38  | 0.6   | 4.24   | 2.28   | 2.24   | 3.77   | 1.16   | 2.74   | 65.27  | 4.08   | SHHC   |
| S12-wms-combined_151843 | 172.69 | 4.46   | 4.74  | 1.39  | 8.06   | 1.6    | 44.47  | 181.19 | 3.7    | 4.19   | 232.91 | 4.48   | Shared |
| S12-wms-combined_302876 | 0.8    | 1.08   | 0.3   | 0.96  | 0.77   | 0.17   | 0.75   | 0.37   | 1      | 0.84   | 16.4   | 0.46   | SHHC   |
| S12-wms-combined_18287  | 55.43  | 35.55  | 3.9   | 3.08  | 304.31 | 13.43  | 63.99  | 33.53  | 7.61   | 45.19  | 645.1  | 44.36  | Shared |
| S12-wms-combined_52101  | 1.55   | 1.17   | 0.1   | 0.51  | 1.41   | 0.43   | 1.35   | 1.18   | 1.06   | 0.69   | 13.11  | 0.8    | SHHC   |
| S12-wms-combined_320262 | 304.84 | 92.53  | 5.41  | 2.75  | 507.87 | 642.36 | 231.25 | 158.9  | 235.24 | 212.78 | 202.01 | 67.25  | Shared |
| S12-wms-combined_2450   | 5.21   | 3.65   | 0.34  | 1.03  | 78.22  | 8.11   | 5.71   | 26.27  | 2.42   | 13.74  | 22.36  | 2.74   | Shared |
| S12-wms-combined_320727 | 88.64  | 54.27  | 5.03  | 3.3   | 360.96 | 11.27  | 154.8  | 26.46  | 3.5    | 125.87 | 365.62 | 32.42  | Shared |
| S12-wms-combined_371541 | 16.63  | 10.8   | 0.47  | 4.75  | 10.92  | 3.24   | 15.58  | 2.4    | 6.44   | 68.6   | 78.53  | 16.01  | Shared |
| S12-wms-combined_120133 | 11.52  | 29.88  | 0.62  | 3.26  | 5.81   | 2.99   | 8.38   | 1.87   | 22.73  | 1.06   | 25.37  | 11.09  | Shared |
| S12-wms-combined_71235  | 3.14   | 1.64   | 0.7   | 0.54  | 1.38   | 0.54   | 1.04   | 1.46   | 0.85   | 1.12   | 16.55  | 1.18   | SHHC   |
| S12-wms-combined_189323 | 50.72  | 21.42  | 3.17  | 6.87  | 591.03 | 156.14 | 39.55  | 39.58  | 31.94  | 222.13 | 496.19 | 42.31  | Shared |
| S12-wms-combined_21504  | 0.8    | 0.78   | 0.07  | 0.15  | 1.12   | 0.26   | 0.92   | 0.79   | 0.82   | 0.4    | 18.36  | 0.53   | SHHC   |
| S12-wms-combined_190114 | 645.11 | 838.25 | 4.22  | 1.83  | 35.52  | 12.12  | 52.89  | 9.45   | 1.56   | 14.15  | 104.29 | 49.87  | Shared |
| S12-wms-combined_256299 | 0.79   | 0.78   | 0.07  | 0.73  | 0.9    | 0.28   | 1.06   | 0.58   | 0.57   | 0.39   | 135.09 | 0.44   | SHHC   |
| S12-wms-combined_156234 | 55.16  | 10.1   | 5.4   | 4.8   | 4.12   | 9.55   | 8.82   | 26.44  | 1.29   | 10.65  | 77.91  | 72.26  | Shared |
| S12-wms-combined_223043 | 1.99   | 3.99   | 0.66  | 0.79  | 1.74   | 0.18   | 5.62   | 5.53   | 1.1    | 2.04   | 15.28  | 8.75   | SHHC   |
| S12-wms-combined_323943 | 1.9    | 1.27   | 0.23  | 1.69  | 1.8    | 0.63   | 1.13   | 5.37   | 0.94   | 0.74   | 26.94  | 1.16   | SHHC   |
| S12-wms-combined_390985 | 0.42   | 0.76   | 0.08  | 0.44  | 0.83   | 0.06   | 0.5    | 0.33   | 0.25   | 0.19   | 32.37  | 0.25   | SHHC   |
| S12-wms-combined_191570 | 1.17   | 1.3    | 0.83  | 0.7   | 0.73   | 0.2    | 0.97   | 0.94   | 0.45   | 0.5    | 51.72  | 0.63   | SHHC   |
| S12-wms-combined_23517  | 116.25 | 15.61  | 4.61  | 2.22  | 58.24  | 14.43  | 9.2    | 181.15 | 5.08   | 20.08  | 200.92 | 23.58  | Shared |
| S12-wms-combined_375343 | 9.6    | 3.32   | 0.23  | 0.66  | 5.08   | 2.25   | 4.75   | 1.62   | 3.49   | 43.71  | 68.05  | 8.5    | Shared |
| S12-wms-combined_325418 | 4.79   | 1.38   | 0.11  | 0.66  | 1.21   | 0.48   | 2      | 1.54   | 2.54   | 1.66   | 36.36  | 0.86   | SHHC   |
| S12-wms-combined_41160  | 4.96   | 2.61   | 0.27  | 0.45  | 1.91   | 0.79   | 1.58   | 42.09  | 0.99   | 1.56   | 34.05  | 1.52   | SHHC   |
| S12-wms-combined_7174   | 16.93  | 4.67   | 2.79  | 1.3   | 11.38  | 4.69   | 43.87  | 9.59   | 2.33   | 101.92 | 50.24  | 2.26   | Shared |
| S12-wms-combined_358010 | 5.94   | 5.05   | 2.67  | 1.7   | 3.17   | 0.65   | 2.09   | 7.07   | 1.11   | 1.92   | 41.99  | 1.71   | SHHC   |
| S12-wms-combined_376326 | 1.39   | 1.37   | 1.89  | 2.45  | 1.05   | 0.34   | 0.87   | 0.99   | 0.78   | 0.48   | 33.6   | 0.78   | SHHC   |
| S12-wms-combined_91231  | 0.74   | 1.03   | 0.05  | 1     | 0.78   | 0.23   | 1.06   | 0.45   | 0.61   | 2.86   | 24.13  | 0.43   | SHHC   |
| S12-wms-combined_107942 | 1.53   | 1.2    | 0.12  | 0.31  | 0.64   | 0.26   | 3.22   | 0.53   | 1.18   | 13.81  | 28.91  | 1.21   | Shared |
| S12-wms-combined_293354 | 248.26 | 1.16   | 3.92  | 0.36  | 1.78   | 0.65   | 69.44  | 281.01 | 0.89   | 1.02   | 251.78 | 1.03   | Shared |
| S12-wms-combined_75733  | 0.78   | 0.52   | 0.26  | 1.2   | 1.1    | 0.17   | 0.8    | 0.49   | 0.59   | 0.15   | 25.41  | 0.42   | SHHC   |
| S12-wms-combined_393703 | 53.59  | 6.56   | 1.02  | 2.2   | 2.67   | 2.12   | 2.02   | 14.35  | 32.09  | 1.5    | 28.65  | 5.17   | Shared |
| S12-wms-combined_358797 | 107.71 | 9.04   | 8.8   | 7.35  | 173.86 | 63.18  | 96.06  | 65.71  | 17.14  | 101.18 | 99.4   | 14.97  | Shared |
| S12-wms-combined_25459  | 143.21 | 9.6    | 12.28 | 12.68 | 226.39 | 137.86 | 141.15 | 134.69 | 20.29  | 153.48 | 656.64 | 26.72  | Shared |
| S12-wms-combined_359190 | 7.58   | 23.02  | 0.47  | 2.56  | 1.78   | 1.01   | 5.4    | 9.55   | 6.18   | 1.77   | 36.28  | 2.22   | SHHC   |
| S12-wms-combined_259783 | 1.34   | 3.74   | 0.38  | 0.44  | 0.84   | 1.39   | 0.76   | 10.53  | 0.43   | 1.2    | 25.72  | 67.32  | Shared |
| S12-wms-combined_260036 | 0.79   | 0.92   | 0.05  | 0.75  | 14.57  | 0.17   | 1.4    | 0.71   | 1.04   | 0.27   | 32.75  | 2.24   | Shared |
| S12-wms-combined_210942 | 70.61  | 15     | 9.66  | 12.92 | 13.76  | 6.13   | 5.51   | 21.1   | 2.62   | 5.34   | 61.75  | 14.96  | Shared |
| S12-wms-combined_328554 | 24.54  | 13.72  | 0.96  | 0.93  | 77.64  | 81.14  | 26.89  | 30.86  | 33.07  | 33.31  | 89.61  | 25.22  | Shared |
| S12-wms-combined_329242 | 14.54  | 17.58  | 0.5   | 2.74  | 2.7    | 42.84  | 2.21   | 6.67   | 2.86   | 1.47   | 24.31  | 5.07   | Shared |
| S12-wms-combined_345948 | 9.04   | 1.97   | 1.73  | 0.95  | 2.73   | 3.55   | 2.63   | 15.26  | 0.75   | 1.96   | 18.59  | 3.17   | SHHC   |
| S12-wms-combined_313953 | 1.12   | 1.09   | 0.05  | 0.31  | 1.11   | 0.26   | 8.06   | 1.28   | 0.75   | 0.96   | 65.33  | 0.64   | SHHC   |
| S12-wms-combined_245755 | 1.24   | 1.14   | 0.08  | 0.25  | 1.39   | 1.03   | 1.02   | 1.09   | 0.43   | 0.45   | 18.43  | 0.62   | SHHC   |
| S12-wms-combined_111524 | 129.73 | 38.88  | 8.21  | 2.69  | 361.77 | 210.32 | 100.25 | 96.18  | 86.68  | 158.42 | 131.63 | 78.06  | Shared |
| S12-wms-combined_263377 | 1.25   | 1.03   | 0.12  | 0.18  | 1.28   | 0.33   | 0.84   | 1.07   | 0.71   | 0.78   | 27.62  | 0.8    | SHHC   |
| S12-wms-combined_297545 | 30.79  | 49.52  | 2.21  | 22.63 | 29.17  | 7.72   | 504.61 | 8.19   | 13.35  | 14.62  | 131.73 | 36.81  | Shared |

|                         |        |        |       |       |         |        |         |        |       |        |        |        |        |
|-------------------------|--------|--------|-------|-------|---------|--------|---------|--------|-------|--------|--------|--------|--------|
| S12-wms-combined_129554 | 1.02   | 0.54   | 0.37  | 0.14  | 1.18    | 0.27   | 0.47    | 4.45   | 0.36  | 0.46   | 17.36  | 0.48   | SHHC   |
| S12-wms-combined_63056  | 6.21   | 2.97   | 0.24  | 0.51  | 1.19    | 0.36   | 1.11    | 0.74   | 0.64  | 7.91   | 19     | 0.89   | SHHC   |
| S12-wms-combined_264077 | 6.62   | 2.99   | 0.88  | 1.41  | 2.06    | 1.32   | 1.71    | 4.76   | 1.1   | 2.03   | 24.77  | 6.23   | SHHC   |
| S12-wms-combined_129799 | 85.2   | 26.97  | 7.83  | 5.38  | 65.94   | 4.07   | 9.16    | 57.32  | 2.6   | 21.67  | 103.02 | 12.88  | Shared |
| S12-wms-combined_63649  | 21.19  | 1.04   | 0.3   | 0.18  | 1.58    | 0.49   | 0.93    | 11.48  | 0.5   | 0.71   | 55.86  | 0.84   | Shared |
| S12-wms-combined_282594 | 20.82  | 51.02  | 0.79  | 0.85  | 117.37  | 2.02   | 8.11    | 102.67 | 2.01  | 15.44  | 84.32  | 3.82   | Shared |
| S12-wms-combined_264425 | 5.19   | 2.41   | 2.43  | 5.56  | 0.97    | 0.58   | 2.12    | 0.9    | 0.91  | 0.67   | 65.24  | 0.97   | SHHC   |
| S12-wms-combined_147628 | 7.56   | 3.88   | 0.51  | 1.01  | 6.48    | 0.63   | 1.79    | 8.69   | 1.07  | 1.21   | 69.27  | 3.5    | SHHC   |
| S12-wms-combined_48648  | 22.48  | 6.78   | 2.96  | 5.71  | 16.22   | 1.7    | 2.79    | 69.38  | 3.29  | 1.78   | 64.75  | 11     | Shared |
| S12-wms-combined_264845 | 43.69  | 12.56  | 5.62  | 10.69 | 16.84   | 4.12   | 5.96    | 23.14  | 4.29  | 13.02  | 51.55  | 20.4   | Shared |
| S12-wms-combined_299293 | 16.35  | 19.05  | 2.9   | 2.64  | 6.74    | 1.49   | 3.88    | 22.55  | 1.91  | 3.49   | 46.99  | 6.32   | Shared |
| S12-wms-combined_98046  | 2.28   | 1.52   | 0.15  | 0.32  | 1.83    | 0.69   | 1.61    | 3.12   | 0.78  | 1.09   | 24.25  | 1.16   | SHHC   |
| S12-wms-combined_299872 | 0.58   | 2.88   | 0.07  | 0.21  | 0.52    | 0.23   | 1.12    | 0.35   | 0.58  | 0.29   | 29.8   | 2.67   | SHHC   |
| S12-wms-combined_148741 | 30.2   | 1.9    | 0.27  | 0.77  | 3.18    | 0.99   | 1.63    | 7.36   | 1.09  | 1.5    | 68.04  | 2.23   | Shared |
| S12-wms-combined_31761  | 2.85   | 5.36   | 0.2   | 1.1   | 1.47    | 1.17   | 2.82    | 0.94   | 4.54  | 0.67   | 23.69  | 1.7    | SHHC   |
| S12-wms-combined_99704  | 2.12   | 1.32   | 0.15  | 0.25  | 1.74    | 0.96   | 2       | 1.56   | 5.05  | 1.2    | 15.46  | 4.91   | SHHC   |
| S12-wms-combined_132907 | 12.7   | 1.06   | 0.6   | 0.84  | 3.81    | 2.56   | 2.6     | 5.8    | 0.77  | 3.47   | 36.15  | 0.83   | Shared |
| S12-wms-combined_250551 | 84.11  | 114.72 | 0.63  | 1.55  | 1.2     | 0.98   | 3.83    | 5.79   | 0.73  | 2.95   | 175.57 | 1.05   | Shared |
| S12-wms-combined_368190 | 43.03  | 58.55  | 2.34  | 32.39 | 24.26   | 8.22   | 93.25   | 12.41  | 6.59  | 41.19  | 163.52 | 142.13 | Shared |
| S12-wms-combined_117447 | 0.5    | 0.55   | 0.11  | 0.19  | 0.4     | 0.13   | 0.28    | 0.6    | 0.24  | 0.19   | 136.97 | 0.29   | SHHC   |
| S12-wms-combined_168259 | 5.5    | 12.23  | 0.31  | 0.55  | 26.96   | 0.65   | 1.81    | 23.06  | 0.93  | 6.53   | 58.04  | 1.7    | Shared |
| S12-wms-combined_270839 | 28.67  | 4.78   | 1.23  | 0.74  | 23.71   | 2.05   | 3.45    | 24.28  | 1.23  | 5.9    | 66.11  | 3.73   | Shared |
| S12-wms-combined_157167 | 1.95   | 0.44   | 0.05  | 0.04  | 0.56    | 0.28   | 0.31    | 0.43   | 0.52  | 0.17   | 49.54  | 0.25   | SHHC   |
| S12-wms-combined_164656 | 1.2    | 1.39   | 0.17  | 0.4   | 1.17    | 0.39   | 1.5     | 0.93   | 0.62  | 0.63   | 232.33 | 0.82   | SHHC   |
| S12-wms-combined_133608 | 1.4    | 2.11   | 0.01  | 0.05  | 0.6     | 0.15   | 0.4     | 0.16   | 0.1   | 0.2    | 13.7   | 0.32   | SHHC   |
| S12-wms_184276          | 1.3    | 0.82   | 0.12  | 0.18  | 1.43    | 0.91   | 1.38    | 1.52   | 0.47  | 5.32   | 45.8   | 0.81   | SHHC   |
| S12-wms_235125          | 2.86   | 1.92   | 4.29  | 1.24  | 2.15    | 0.77   | 1.71    | 2.33   | 0.96  | 2.14   | 258.65 | 2.88   | SHHC   |
| S12-wms_17950           | 1.02   | 1.24   | 1.77  | 1.06  | 2.03    | 0.91   | 0.84    | 1.17   | 0.37  | 2.37   | 18.18  | 0.48   | SHHC   |
| S12-wms_135291          | 96.22  | 63.95  | 3.74  | 10.41 | 26.27   | 7.24   | 25.99   | 32.26  | 46.78 | 17.22  | 133.24 | 63.82  | Shared |
| S12-wms_352846          | 0.58   | 1      | 0.03  | 0.14  | 0.82    | 0.2    | 0.73    | 0.4    | 0.38  | 0.25   | 49.7   | 0.25   | SHHC   |
| S12-wms_386692          | 14.32  | 5.15   | 1.46  | 0.77  | 13.12   | 1.57   | 7.75    | 20.65  | 0.42  | 3.64   | 387.22 | 1.51   | Shared |
| S12-wms_202803          | 62.69  | 1.96   | 3.7   | 0.6   | 2.97    | 1.02   | 2       | 4.33   | 1.06  | 3.21   | 37.5   | 5.81   | Shared |
| S12-wms_336780          | 17.25  | 1.36   | 0.07  | 0.37  | 0.34    | 0.19   | 0.52    | 0.2    | 0.74  | 0.37   | 32.18  | 0.4    | Shared |
| S12-wms_373775          | 37.66  | 2.75   | 0.7   | 1.56  | 2.43    | 1.03   | 2.48    | 57.33  | 1.1   | 0.98   | 57.82  | 3.04   | Shared |
| S12-wms_223235          | 0.64   | 1.68   | 4.61  | 0.34  | 0.45    | 0.13   | 4.34    | 1.05   | 1.37  | 0.19   | 14.08  | 0.4    | SHHC   |
| S12-wms_193565          | 1.82   | 12.37  | 0.09  | 0.26  | 1.09    | 0.4    | 0.61    | 1.93   | 0.59  | 0.99   | 26.5   | 0.82   | SHHC   |
| S12-wms_161239          | 59.85  | 17.65  | 5.92  | 3.4   | 114.59  | 6.5    | 15.56   | 34.78  | 2.32  | 31.42  | 50.83  | 22.06  | Shared |
| S12-wms_44817           | 0.86   | 0.74   | 0.06  | 0.42  | 2.33    | 0.43   | 0.94    | 0.94   | 0.56  | 3.14   | 60.19  | 0.45   | SHHC   |
| S12-wms_179388          | 11.01  | 2.17   | 0.14  | 6.62  | 1.05    | 0.35   | 1.94    | 0.96   | 2.2   | 10.58  | 18.26  | 1.2    | Shared |
| S12-wms_12658           | 2.54   | 5.21   | 0.38  | 0.81  | 3.02    | 0.88   | 20.7    | 1.02   | 1.76  | 5.33   | 74.96  | 7.98   | Shared |
| S12-wms_383851          | 2.5    | 2.14   | 0.11  | 1.08  | 2.2     | 0.5    | 38.15   | 1.5    | 0.79  | 2.36   | 155.27 | 1.4    | Shared |
| S12-wms_15700           | 0.66   | 1.22   | 0.15  | 0.59  | 0.53    | 0.14   | 1.04    | 0.24   | 0.66  | 4.4    | 26.74  | 0.31   | SHHC   |
| S12-wms_401366          | 1.3    | 2      | 0.07  | 0.33  | 0.64    | 0.23   | 0.71    | 0.68   | 0.62  | 2.4    | 43.59  | 0.45   | SHHC   |
| S12-wms_401372          | 0.53   | 1.16   | 0.33  | 0.72  | 0.46    | 0.32   | 1.2     | 0.65   | 0.33  | 0.24   | 150.78 | 0.37   | SHHC   |
| S2-wms-combined_207832  | 2.73   | 191.02 | 1.99  | 1.18  | 2.28    | 1.07   | 6.62    | 1.53   | 0.71  | 4.16   | 83.41  | 1.56   | SHHC   |
| S2-wms-combined_248318  | 3.17   | 26.83  | 0.16  | 0.14  | 2.61    | 0.5    | 1.48    | 10.16  | 1.26  | 0.7    | 3.05   | 9.99   | SHHC   |
| S2-wms-combined_248329  | 1.68   | 15.25  | 0.08  | 0.24  | 1.21    | 0.3    | 0.85    | 0.94   | 0.63  | 0.51   | 1.03   | 0.61   | SHHC   |
| S2-wms-combined_31084   | 1.61   | 107.67 | 0.14  | 0.68  | 0.98    | 0.82   | 1.79    | 0.51   | 1.72  | 0.34   | 3.93   | 0.77   | SHHC   |
| S2-wms-combined_196783  | 16.96  | 32.94  | 1.93  | 2.4   | 23.23   | 9.54   | 8.97    | 11.51  | 9.51  | 20.39  | 12.05  | 50.68  | Shared |
| S2-wms-combined_165833  | 3.61   | 18.15  | 0.12  | 0.38  | 1.86    | 0.31   | 3.37    | 0.54   | 1.17  | 0.32   | 1.06   | 7.22   | SHHC   |
| S2-wms-combined_176376  | 1.05   | 15.73  | 0.1   | 0.68  | 0.82    | 0.67   | 0.72    | 1.16   | 0.78  | 0.31   | 1.32   | 4.31   | SHHC   |
| S2-wms-combined_62377   | 90.91  | 190.42 | 0.11  | 0.34  | 0.76    | 0.12   | 0.74    | 0.57   | 0.57  | 0.36   | 0.79   | 0.51   | Shared |
| S2-wms-combined_72725   | 42.82  | 88.08  | 1.36  | 3.64  | 50.69   | 13.6   | 16.69   | 43.68  | 16.03 | 20.81  | 24.82  | 60.26  | Shared |
| S2-wms-combined_135014  | 27.51  | 118.6  | 0.27  | 0.65  | 0.99    | 15.83  | 63.37   | 0.88   | 3.75  | 0.73   | 1.05   | 20.94  | Shared |
| S2-wms-combined_62519   | 82.49  | 184.64 | 6.79  | 4.5   | 22.83   | 7.24   | 10.37   | 124.36 | 4.24  | 25.77  | 52.31  | 57.92  | Shared |
| S2-wms-combined_135139  | 36.95  | 109.53 | 0.71  | 0.64  | 154.8   | 1.16   | 8.3     | 133.84 | 1.18  | 14.69  | 37.34  | 1.66   | Shared |
| S2-wms-combined_218002  | 15.51  | 85.74  | 0.97  | 3.24  | 3.04    | 3.97   | 13.54   | 6.83   | 11.65 | 4.59   | 5.16   | 15.79  | Shared |
| S2-wms-combined_135154  | 65.72  | 96.6   | 0.25  | 1.3   | 5.24    | 11.93  | 63.2    | 1.63   | 41.55 | 1.05   | 2.01   | 26.87  | Shared |
| S2-wms-combined_238929  | 16.9   | 38.66  | 0.88  | 0.54  | 2.39    | 0.47   | 1.84    | 6.77   | 0.96  | 1.61   | 7.46   | 1.35   | Shared |
| S2-wms-combined_93845   | 10.87  | 63.06  | 0.68  | 0.95  | 8.07    | 3.3    | 2.25    | 56.36  | 2.24  | 3.25   | 9.56   | 3.84   | Shared |
| S2-wms-combined_73327   | 0.98   | 15.39  | 0.06  | 0.78  | 0.87    | 0.29   | 0.79    | 0.35   | 2.45  | 1.01   | 1.08   | 1.88   | SHHC   |
| S2-wms-combined_52568   | 14.82  | 51.74  | 1.51  | 1.27  | 13.85   | 2.91   | 3.79    | 45.49  | 2.11  | 6.1    | 17.17  | 7.75   | Shared |
| S2-wms-combined_166665  | 44.11  | 71.25  | 7.49  | 15.99 | 3.08    | 39.54  | 7.09    | 25.96  | 3.87  | 9.64   | 31.37  | 95.71  | Shared |
| S2-wms-combined_62839   | 23.61  | 57.21  | 0.14  | 0.73  | 0.91    | 0.34   | 1.14    | 0.9    | 0.97  | 0.47   | 1.08   | 0.78   | Shared |
| S2-wms-combined_197577  | 4.99   | 45.19  | 1.98  | 0.41  | 0.65    | 0.5    | 0.89    | 0.27   | 0.86  | 0.19   | 0.58   | 0.37   | SHHC   |
| S2-wms-combined_208559  | 149.5  | 56.71  | 11.07 | 5.31  | 447.38  | 129.12 | 100.05  | 134.25 | 30.78 | 109.64 | 136.34 | 29.6   | Shared |
| S2-wms-combined_229529  | 46.37  | 173.2  | 1.69  | 12.15 | 60.36   | 10.49  | 58.92   | 10     | 48    | 13.52  | 21.32  | 28.14  | Shared |
| S2-wms-combined_115352  | 0.86   | 13.12  | 0.02  | 0.16  | 2.34    | 0.81   | 0.99    | 0.88   | 0.9   | 0.52   | 0.77   | 0.54   | SHHC   |
| S2-wms-combined_84608   | 102.77 | 58.45  | 2.24  | 1.3   | 1.17    | 0.3    | 5.99    | 2.86   | 2.5   | 0.63   | 1.26   | 0.72   | Shared |
| S2-wms-combined_126134  | 2.53   | 41.42  | 0.79  | 1.65  | 3.06    | 5.13   | 6.84    | 2.57   | 2.9   | 3.94   | 4.29   | 16.22  | Shared |
| S2-wms-combined_74387   | 3.29   | 20.55  | 0.2   | 0.52  | 2.3     | 0.81   | 1.91    | 4.22   | 1.45  | 3.06   | 4.18   | 2.19   | SHHC   |
| S2-wms-combined_230282  | 2.95   | 6.46   | 0.67  | 0.31  | 1.6     | 0.86   | 0.52    | 1.42   | 1.47  | 1.05   | 6.88   | 1.38   | SHHC   |
| S2-wms-combined_126440  | 1.76   | 24.57  | 0.16  | 0.5   | 0.92    | 1.14   | 1.73    | 0.71   | 0.95  | 0.74   | 1.04   | 0.45   | SHHC   |
| S2-wms-combined_147065  | 73.55  | 186.02 | 1.74  | 4.77  | 29.75   | 18.71  | 44.45   | 13.52  | 19.24 | 16.34  | 18.23  | 26.96  | Shared |
| S2-wms-combined_137119  | 8.6    | 53.73  | 0.68  | 0.91  | 9.17    | 0.82   | 4.46    | 5.59   | 1.31  | 10.55  | 12.02  | 9.05   | Shared |
| S2-wms-combined_85381   | 2.55   | 26.34  | 0.26  | 0.82  | 2.08    | 1.5    | 6.96    | 2.39   | 6.53  | 7.81   | 2.92   | 5.99   | SHHC   |
| S2-wms-combined_116221  | 23.98  | 20.59  | 0.34  | 4.21  | 4.97    | 5.08   | 2.75    | 20.92  | 1.31  | 5.43   | 22.94  | 3.65   | Shared |
| S2-wms-combined_95987   | 0.96   | 13.03  | 0.13  | 0.53  | 1.66    | 0.29   | 0.43    | 0.61   | 0.49  | 0.77   | 0.84   | 0.54   | SHHC   |
| S2-wms-combined_157934  | 7.03   | 66.04  | 7.26  | 23    | 4.18    | 12.37  | 6.67    | 5.01   | 35.94 | 2.38   | 5.45   | 4.53   | Shared |
| S2-wms-combined_64692   | 7.21   | 27.06  | 0.15  | 0.62  | 0.92    | 0.84   | 1.35    | 1.13   | 0.53  | 1.39   | 0.87   | 1.31   | SHHC   |
| S2-wms-combined_127080  | 3.42   | 18.12  | 0.21  | 0.94  | 1.45    | 0.48   | 1.22    | 1.63   | 0.82  | 1.11   | 2.48   | 1.08   | SHHC   |
| S2-wms-combined_13246   | 146.18 | 134.84 | 19.07 | 24.88 | 12.49   | 24.53  | 20.88   | 76.53  | 3.61  | 47.51  | 59.09  | 201.25 | Shared |
| S2-wms-combined_199384  | 4.37   | 11.65  | 0.66  | 0.26  | 2.65    | 0.55   | 1.96    | 2.33   | 1.42  | 2.56   | 6.88   | 3.46   | SHHC   |
| S2-wms-combined_55495   | 3.77   | 77.42  | 0.14  | 0.16  | 1.6     | 2.57   | 0.81    | 0.93   | 0.75  | 2.47   | 3.16   | 0.85   | SHHC   |
| S2-wms-combined_158821  | 40.98  | 42.91  | 0.53  | 7.26  | 0.78    | 1.65   | 1.11    | 6.29   | 0.86  | 8.26   | 10.42  | 0.53   | Shared |
| S2-wms-combined_210822  | 675.74 | 819.46 | 47.34 | 37.99 | 1546.97 | 343.03 | 1259.36 | 210.47 | 78.36 | 461.06 | 902.13 | 82.64  | Shared |

|                        |        |         |       |         |        |        |        |        |        |        |        |        |        |
|------------------------|--------|---------|-------|---------|--------|--------|--------|--------|--------|--------|--------|--------|--------|
| S2-wms-combined_190624 | 0.89   | 19.47   | 0.04  | 0.57    | 0.59   | 0.2    | 0.68   | 0.59   | 0.79   | 0.23   | 0.6    | 0.55   | SHHC   |
| S2-wms-combined_24549  | 33.26  | 73.77   | 2.92  | 2.61    | 39.9   | 9.66   | 13.23  | 23.79  | 6.54   | 51.36  | 26.42  | 65.31  | Shared |
| S2-wms-combined_180640 | 19.94  | 49.97   | 0.32  | 0.91    | 0.61   | 1.1    | 1.67   | 0.87   | 1.39   | 0.37   | 1.28   | 1.03   | Shared |
| S2-wms-combined_170845 | 6.22   | 38.05   | 0.44  | 1.67    | 1.4    | 0.52   | 5.23   | 4.3    | 2.99   | 0.79   | 1.77   | 6.36   | SHHC   |
| S2-wms-combined_159670 | 16.97  | 19.75   | 1.3   | 0.94    | 30.17  | 4.03   | 3.87   | 7.14   | 1.19   | 7.59   | 9.64   | 6.73   | Shared |
| S2-wms-combined_181391 | 19.46  | 37.87   | 1.58  | 2.28    | 19.92  | 13.15  | 7.75   | 16.44  | 21.79  | 19.55  | 12.73  | 79.82  | Shared |
| S2-wms-combined_200390 | 86.75  | 83.27   | 6.3   | 8.73    | 20.68  | 12.93  | 29.15  | 23.96  | 86.77  | 16.47  | 31.87  | 41.16  | Shared |
| S2-wms-combined_233107 | 18.93  | 23.81   | 0.32  | 1.84    | 43.34  | 2.52   | 13.19  | 10.35  | 12.37  | 9.48   | 6.6    | 28.57  | Shared |
| S2-wms-combined_57293  | 211.1  | 130.77  | 23.34 | 48.29   | 11.22  | 75.16  | 31.08  | 90.99  | 5.25   | 34.28  | 90.33  | 262.42 | Shared |
| S2-wms-combined_191613 | 4.68   | 22.11   | 0.36  | 1.04    | 2.05   | 2.65   | 2.03   | 10.4   | 2.78   | 1.71   | 3.94   | 11.45  | Shared |
| S2-wms-combined_98888  | 77.21  | 95.29   | 6.67  | 25.88   | 48.22  | 10.26  | 39.33  | 30.02  | 62.95  | 22.47  | 45.92  | 48.81  | Shared |
| S2-wms-combined_181849 | 106.7  | 156.85  | 12.55 | 16.35   | 12.41  | 10.77  | 17.67  | 50.45  | 2.6    | 35.66  | 41.89  | 133.28 | Shared |
| S2-wms-combined_48661  | 4.91   | 16.46   | 0.66  | 3.08    | 3.71   | 1.32   | 4.29   | 2.01   | 6.76   | 2.02   | 5.3    | 3.69   | SHHC   |
| S2-wms-combined_201205 | 39.26  | 129.16  | 0.07  | 0.54    | 2.54   | 0.57   | 1.18   | 3.68   | 0.85   | 0.95   | 1.62   | 0.87   | Shared |
| S2-wms-combined_99446  | 8.66   | 64.13   | 0.76  | 3.98    | 1.66   | 1.15   | 9.12   | 2.12   | 9.96   | 0.81   | 2.24   | 5.99   | SHHC   |
| S2-wms-combined_25727  | 17.23  | 33.23   | 2.5   | 2.04    | 3.23   | 0.81   | 1.85   | 17.25  | 1      | 1.36   | 29.21  | 1.53   | Shared |
| S2-wms-combined_78670  | 65.28  | 63.69   | 3.6   | 2.65    | 50.54  | 1.97   | 6.77   | 18.95  | 2.79   | 12.57  | 42.37  | 5.87   | Shared |
| S2-wms-combined_58121  | 128.36 | 305.21  | 3.66  | 26      | 73.04  | 39.19  | 312.64 | 14.78  | 7.47   | 24.13  | 163.67 | 155.16 | Shared |
| S2-wms-combined_140996 | 145.41 | 164.68  | 11.51 | 6.47    | 64.81  | 10.48  | 12.37  | 198.85 | 7.57   | 41.91  | 70.52  | 27.8   | Shared |
| S2-wms-combined_89742  | 12.87  | 9.59    | 0.04  | 0.23    | 1.12   | 0.26   | 0.97   | 0.42   | 0.86   | 0.34   | 0.68   | 0.48   | Shared |
| S2-wms-combined_222535 | 1.99   | 54.74   | 0.21  | 2.22    | 0.89   | 0.35   | 1.57   | 0.73   | 3.74   | 0.7    | 0.75   | 0.56   | SHHC   |
| S2-wms-combined_58563  | 15.34  | 53.86   | 1.22  | 1.27    | 7.93   | 2.5    | 2.84   | 76.05  | 2.26   | 4.51   | 25.41  | 3.86   | Shared |
| S2-wms-combined_174241 | 21.33  | 28.03   | 0.98  | 1.01    | 9.91   | 0.88   | 9.87   | 3.63   | 3.15   | 13.38  | 4.33   | 2.29   | Shared |
| S2-wms-combined_110215 | 16.49  | 22      | 1.86  | 3.47    | 5.42   | 2.57   | 6.63   | 7.37   | 1.32   | 5.51   | 6.26   | 14.89  | Shared |
| S2-wms-combined_5791   | 36.66  | 53.37   | 3.61  | 4.86    | 7.97   | 2.63   | 10.46  | 7.34   | 25.61  | 7.68   | 11.02  | 10.97  | Shared |
| S2-wms-combined_51446  | 0.31   | 10.91   | 0.05  | 0.22    | 0.55   | 0.12   | 0.4    | 0.78   | 0.43   | 0.28   | 0.87   | 0.31   | SHHC   |
| S2-wms-combined_101826 | 4.04   | 44.35   | 2.95  | 0.5     | 1.41   | 0.38   | 22.13  | 7.79   | 1.64   | 0.53   | 9.22   | 0.97   | Shared |
| S2-wms-combined_122457 | 16.39  | 65.87   | 2.11  | 2.26    | 12.19  | 7.3    | 7.86   | 10.02  | 4.18   | 27.62  | 10.15  | 40.34  | Shared |
| S2-wms-combined_244564 | 26.1   | 29.87   | 1.62  | 3.28    | 22.73  | 2.31   | 18.69  | 25.28  | 9.79   | 7.82   | 20.18  | 10.94  | Shared |
| S2-wms-combined_6605   | 13.06  | 21.19   | 0.33  | 2.47    | 2.61   | 40.7   | 2.25   | 6.84   | 3.22   | 1.91   | 22.68  | 6.39   | Shared |
| S2-wms-combined_185494 | 31.63  | 75.2    | 0.12  | 0.66    | 2.28   | 10.86  | 64.53  | 0.77   | 36.7   | 0.52   | 1.09   | 10.94  | Shared |
| S2-wms-combined_132966 | 1.26   | 13.87   | 0.09  | 0.17    | 1.05   | 0.22   | 1.19   | 0.69   | 0.6    | 0.36   | 0.81   | 0.77   | SHHC   |
| S2-wms-combined_225908 | 110.2  | 36.86   | 1.52  | 2.72    | 12.11  | 3.09   | 5.13   | 12.21  | 3.38   | 7.45   | 36.48  | 15.06  | Shared |
| S2-wms-combined_246480 | 1.13   | 20.47   | 0.11  | 0.62    | 1.07   | 0.21   | 0.86   | 0.52   | 0.97   | 0.41   | 0.98   | 0.61   | SHHC   |
| S2-wms-combined_113619 | 385.13 | 171.37  | 0.29  | 1.41    | 4.47   | 4.78   | 6      | 33.94  | 63.9   | 1.66   | 1.34   | 0.78   | Shared |
| S2-wms-combined_227800 | 9.61   | 37.72   | 1.45  | 1.57    | 22.66  | 15.4   | 9.74   | 12.69  | 14.21  | 9.75   | 12.61  | 28.61  | Shared |
| S2-wms-combined_30750  | 5.95   | 31.7    | 1.4   | 0.46    | 0.88   | 0.31   | 9.16   | 3.76   | 1.08   | 0.39   | 6.93   | 0.64   | SHHC   |
| S2-wms-combined_52006  | 36.84  | 36.59   | 3.12  | 1.91    | 467.04 | 1.03   | 47.05  | 28.77  | 0.69   | 6.04   | 18.91  | 5.09   | Shared |
| S2-wms-combined_75144  | 23.43  | 87.15   | 0.25  | 1.91    | 26.93  | 3.47   | 28.47  | 1.3    | 0.65   | 17.15  | 7.25   | 4.74   | Shared |
| S2-wms-combined_181095 | 3.68   | 24.55   | 1.07  | 2.94    | 1.38   | 4.61   | 0.57   | 1.43   | 0.39   | 1.04   | 4.33   | 1.45   | SHHC   |
| S2-wms-combined_4685   | 46.28  | 165.47  | 2.25  | 0.66    | 1.88   | 0.56   | 2.04   | 103.73 | 1.12   | 5.16   | 10.23  | 1.48   | Shared |
| S2-wms-combined_143737 | 65.83  | 143.91  | 0.9   | 1.25    | 18.22  | 28.48  | 31.72  | 3.16   | 4.4    | 4.91   | 8.51   | 10.57  | Shared |
| S2-wms-combined_204225 | 0.38   | 12.12   | 0.01  | 0.05    | 0.62   | 0.05   | 0.42   | 0.19   | 1.46   | 0.62   | 0.31   | 0.18   | SHHC   |
| S2-wms-combined_7756   | 35.87  | 111.72  | 0.33  | 0.16    | 80.63  | 0.59   | 4.36   | 56.63  | 0.92   | 6.06   | 18.48  | 0.94   | Shared |
| S2-wms-combined_207000 | 2.81   | 41.78   | 1.07  | 3.56    | 3.85   | 1.84   | 2.15   | 1.54   | 6.27   | 1.07   | 1.94   | 1.14   | SHHC   |
| S2-wms_124416          | 48.39  | 107.07  | 2.76  | 6.45    | 12.45  | 4.92   | 13.91  | 21.29  | 5.53   | 10.54  | 24.47  | 22.56  | Shared |
| S2-wms_156439          | 26.94  | 106.95  | 0.96  | 3.75    | 58.94  | 3.74   | 30.63  | 7.7    | 215.23 | 7.35   | 30.12  | 11.07  | Shared |
| S2-wms_53881           | 1.55   | 3031.13 | 1.05  | 1.1     | 0.63   | 0.14   | 0.81   | 0.78   | 2.06   | 1.64   | 2.23   | 1.46   | SHHC   |
| S2-wms_23562           | 5.99   | 20.88   | 0.07  | 0.31    | 0.65   | 0.12   | 0.7    | 0.3    | 0.86   | 0.19   | 0.8    | 0.33   | SHHC   |
| S2-wms_107329          | 6.24   | 29.18   | 0.89  | 0.97    | 8.07   | 3.21   | 7.11   | 5.25   | 1.66   | 17.42  | 5.55   | 19.03  | Shared |
| S2-wms_128831          | 0.53   | 118.94  | 0.17  | 0.54    | 0.51   | 0.16   | 1.56   | 0.31   | 0.7    | 0.3    | 0.5    | 0.51   | SHHC   |
| S2-wms_128962          | 17.34  | 3364.14 | 1.16  | 1.93    | 0.49   | 4.1    | 0.57   | 0.29   | 1.53   | 1.26   | 2.51   | 1.42   | Shared |
| S2-wms_140933          | 11.66  | 23.86   | 0.58  | 2.28    | 3.22   | 1.4    | 4.07   | 2.54   | 6.93   | 2.01   | 3.58   | 4.47   | Shared |
| S2-wms_192667          | 2.7    | 29.96   | 0.5   | 1.08    | 0.7    | 3.67   | 3.96   | 2.04   | 1.66   | 7.38   | 5.13   | 0.64   | SHHC   |
| S2-wms_79304           | 0.79   | 37.08   | 0.16  | 0.41    | 0.59   | 0.17   | 0.73   | 0.58   | 0.58   | 0.31   | 0.64   | 3.07   | SHHC   |
| S2-wms_161986          | 17.09  | 66.05   | 10.37 | 0.76    | 1.59   | 0.78   | 2.54   | 3.13   | 1.63   | 7.05   | 10.78  | 2.09   | Shared |
| S2-wms_79944           | 15.7   | 91.4    | 0.27  | 0.67    | 1.11   | 0.21   | 1.53   | 2.46   | 0.84   | 28.36  | 1.64   | 0.53   | Shared |
| S2-wms_130687          | 8.7    | 52.12   | 1.42  | 6.39    | 132.79 | 8.02   | 16.1   | 4.98   | 6.75   | 3.65   | 4.61   | 1.28   | Shared |
| S2-wms_110761          | 16.7   | 8.63    | 0.03  | 0.16    | 0.45   | 0.13   | 0.27   | 0.3    | 0.62   | 0.19   | 0.47   | 0.08   | Shared |
| S2-wms_6424            | 0.6    | 110.94  | 0.08  | 0.55    | 0.65   | 0.11   | 0.81   | 0.3    | 0.4    | 8.93   | 13.43  | 0.49   | SHHC   |
| S2-wms_245232          | 1.48   | 90.61   | 0.22  | 0.5     | 1.16   | 0.31   | 1.43   | 1.02   | 0.98   | 1.07   | 5.88   | 0.91   | SHHC   |
| S2-wms_246296          | 12.95  | 51.5    | 0.26  | 0.61    | 1.37   | 0.27   | 1.56   | 2.87   | 0.99   | 1.01   | 22.91  | 0.67   | Shared |
| S2-wms_248315          | 0.79   | 76.59   | 0.09  | 0.55    | 0.77   | 0.24   | 8.8    | 0.33   | 1.14   | 0.31   | 0.71   | 0.41   | SHHC   |
| S2-wms_248324          | 0.89   | 52.29   | 0.07  | 0.16    | 0.62   | 0.15   | 0.82   | 0.51   | 0.58   | 0.31   | 0.79   | 0.52   | SHHC   |
| S2-wms_248327          | 1.22   | 15.32   | 0.09  | 0.12    | 0.82   | 0.25   | 0.89   | 1.49   | 0.85   | 0.43   | 1.23   | 0.97   | SHHC   |
| S4-wms-combined_118531 | 1.48   | 1.63    | 0.94  | 69.21   | 1.47   | 0.33   | 1.37   | 1.05   | 1.38   | 0.85   | 2.01   | 1.06   | SHHC   |
| S4-wms-combined_14411  | 2.9    | 24.2    | 0.53  | 29.22   | 0.6    | 3.21   | 0.78   | 0.41   | 0.42   | 0.23   | 0.72   | 0.37   | SHHC   |
| S4-wms-combined_112093 | 10.65  | 4.99    | 0.83  | 20.89   | 4.4    | 14.9   | 1.3    | 7.66   | 1.42   | 9.81   | 4.41   | 1.16   | Shared |
| S4-wms-combined_42647  | 94.37  | 70.63   | 9.34  | 25.99   | 32.03  | 37.81  | 25.96  | 36.92  | 39.62  | 28.27  | 62.86  | 58.68  | Shared |
| S4-wms-combined_1246   | 95.52  | 21.33   | 9.38  | 15.15   | 72.49  | 3.87   | 17.88  | 37.49  | 9.37   | 13.47  | 31.55  | 11.4   | Shared |
| S4-wms-combined_22012  | 4.05   | 2.45    | 9.85  | 42.15   | 7.15   | 1.6    | 5.9    | 6      | 1.69   | 2.73   | 3.93   | 8.81   | SHHC   |
| S4-wms-combined_57123  | 1.54   | 2.02    | 0.67  | 1125.01 | 8.22   | 0.47   | 3.84   | 6.29   | 0.99   | 2.77   | 3.74   | 1.06   | SHHC   |
| S4-wms-combined_64632  | 1.66   | 2.34    | 0.19  | 17.5    | 1.99   | 0.47   | 5.18   | 0.85   | 3.11   | 0.66   | 1.34   | 1.8    | SHHC   |
| S4-wms-combined_113721 | 52.2   | 29.2    | 5.59  | 16.48   | 5.16   | 2.12   | 19.17  | 22.45  | 1.63   | 57.5   | 29.79  | 47.69  | Shared |
| S4-wms-combined_57963  | 5.18   | 4.13    | 3.02  | 70.83   | 3.28   | 0.87   | 3.07   | 3.01   | 2.47   | 3.59   | 4.62   | 3.05   | SHHC   |
| S4-wms-combined_10758  | 0.45   | 0.73    | 8.88  | 54.01   | 0.75   | 0.23   | 0.77   | 0.3    | 0.7    | 0.21   | 0.52   | 0.38   | SHHC   |
| S4-wms-combined_17284  | 3.76   | 1.6     | 7.01  | 18.47   | 15.44  | 9.83   | 5.61   | 2.65   | 39.22  | 1.43   | 2.37   | 2.5    | Shared |
| S4-wms-combined_24659  | 0.86   | 0.48    | 0.86  | 0.36    | 23.02  | 0.62   | 0.18   | 1.11   | 0.73   | 0.62   | 0.75   | 0.4    | SHHC   |
| S4-wms-combined_121978 | 10.95  | 12.58   | 0.65  | 32.94   | 3.96   | 1.61   | 10.1   | 6.16   | 18.81  | 3.67   | 5.04   | 9.71   | Shared |
| S4-wms-combined_25201  | 10.17  | 15.34   | 0.75  | 37.93   | 6.19   | 1.92   | 13.6   | 3.56   | 26.28  | 3.17   | 5.98   | 11.06  | Shared |
| S4-wms-combined_47565  | 0.77   | 0.72    | 0.07  | 49.77   | 0.99   | 0.28   | 0.88   | 0.89   | 0.53   | 0.24   | 0.75   | 0.43   | SHHC   |
| S4-wms-combined_83492  | 2.26   | 1.04    | 0.24  | 22.42   | 0.96   | 0.21   | 0.92   | 0.92   | 0.56   | 0.67   | 1.44   | 319.19 | Shared |
| S4-wms-combined_41490  | 131.69 | 9.41    | 8.58  | 20.74   | 300.61 | 132.01 | 130.55 | 98.94  | 17.43  | 166.14 | 68.44  | 13.51  | Shared |
| S4-wms-combined_51079  | 10.89  | 2.68    | 10.24 | 17.17   | 10.68  | 5.57   | 15.02  | 3.53   | 14.54  | 2.6    | 3.12   | 6.31   | Shared |
| S4-wms-combined_143879 | 0.46   | 0.98    | 0.21  | 23.35   | 0.4    | 0.17   | 0.97   | 0.47   | 0.86   | 0.41   | 0.76   | 0.34   | SHHC   |
| S4-wms_118690          | 0.46   | 0.86    | 0.05  | 40.73   | 0.53   | 0.15   | 0.76   | 0.23   | 1.21   | 0.14   | 0.65   | 0.44   | SHHC   |

|                        |        |        |       |         |        |        |        |        |       |        |        |        |        |
|------------------------|--------|--------|-------|---------|--------|--------|--------|--------|-------|--------|--------|--------|--------|
| S4-wms_161443          | 0.47   | 0.47   | 0.1   | 21.97   | 0.56   | 0.15   | 0.24   | 0.43   | 0.25  | 0.24   | 1      | 0.22   | SHHC   |
| S4-wms_50475           | 4.98   | 6.79   | 0.62  | 589.25  | 5.46   | 1.04   | 7.71   | 22.18  | 2.29  | 2.34   | 3.68   | 5.52   | SHHC   |
| S4-wms_141607          | 2.8    | 2.55   | 0.64  | 1303.88 | 7.37   | 0.78   | 3.52   | 3.69   | 1.95  | 2.73   | 4.6    | 1.62   | SHHC   |
| S4-wms_107182          | 2.02   | 1.22   | 4.8   | 12.5    | 2.64   | 0.6    | 1.14   | 4.99   | 0.6   | 0.7    | 1.83   | 1.98   | SHHC   |
| S4-wms_114120          | 0.45   | 0.69   | 0.03  | 21.49   | 0.9    | 0.16   | 0.81   | 0.38   | 0.64  | 0.26   | 0.78   | 0.51   | SHHC   |
| S4-wms_45128           | 0.65   | 1.02   | 0.04  | 36.6    | 0.96   | 0.22   | 1.21   | 0.37   | 0.69  | 0.25   | 0.81   | 0.57   | SHHC   |
| S4-wms_73990           | 0.57   | 2.05   | 0.05  | 42.34   | 0.51   | 0.13   | 0.94   | 2.54   | 1.02  | 0.16   | 0.61   | 0.43   | SHHC   |
| S4-wms_62635           | 0.88   | 1.39   | 0.15  | 50.56   | 4.42   | 0.38   | 1.13   | 0.41   | 2.64  | 0.31   | 0.96   | 0.58   | SHHC   |
| S6-wms-combined_117756 | 1.51   | 2.75   | 0.11  | 0.41    | 1.41   | 144.95 | 2      | 1.15   | 0.73  | 0.57   | 1.23   | 0.9    | SHHC   |
| S6-wms-combined_41246  | 44.99  | 39.92  | 5.38  | 3.85    | 130    | 91.67  | 50.33  | 22.84  | 35.19 | 22.05  | 13.99  | 12.8   | Shared |
| S6-wms-combined_135223 | 16.07  | 40.42  | 0.61  | 20.74   | 114.07 | 57.53  | 350.63 | 5.24   | 1.83  | 9.21   | 84.71  | 4.37   | Shared |
| S6-wms-combined_88414  | 37.68  | 146.74 | 5.26  | 6.22    | 4.1    | 66.43  | 26.48  | 15.96  | 15.11 | 22.65  | 18.97  | 9.44   | Shared |
| S6-wms-combined_745    | 7.89   | 0.91   | 0.04  | 0.2     | 1.09   | 30.98  | 1.25   | 0.69   | 0.94  | 0.64   | 0.82   | 0.52   | SHHC   |
| S6-wms-combined_82597  | 55.79  | 100.74 | 4.48  | 5.62    | 50.72  | 124.93 | 107.63 | 14.08  | 13.29 | 27.96  | 49.76  | 60.79  | Shared |
| S6-wms-combined_65225  | 0.76   | 0.89   | 0.04  | 0.48    | 0.5    | 18.71  | 0.61   | 0.55   | 0.75  | 0.24   | 0.65   | 0.54   | SHHC   |
| S6-wms-combined_118427 | 37.08  | 43.04  | 5.85  | 6.7     | 50.49  | 91.87  | 33.72  | 30.54  | 64.47 | 33.07  | 24.78  | 150.71 | Shared |
| S6-wms-combined_118484 | 5.09   | 1.78   | 0.16  | 1.07    | 1.5    | 43.89  | 7.77   | 1.06   | 0.56  | 1.06   | 1.77   | 28.61  | Shared |
| S6-wms-combined_72228  | 94.37  | 31.26  | 2.09  | 1.62    | 216.35 | 240.44 | 74.68  | 58.57  | 75.05 | 87     | 105.2  | 25.65  | Shared |
| S6-wms-combined_119017 | 9.3    | 0.9    | 0.29  | 0.65    | 1.98   | 40.6   | 2.95   | 16.29  | 0.76  | 3.71   | 1.63   | 0.91   | SHHC   |
| S6-wms-combined_119138 | 26.74  | 94.16  | 3.61  | 2.32    | 7.92   | 45.28  | 19.6   | 9.04   | 6.3   | 11.46  | 15.82  | 6.19   | Shared |
| S6-wms-combined_49909  | 6.6    | 4.69   | 1.53  | 2.21    | 1.83   | 68.54  | 1      | 2.59   | 0.87  | 0.92   | 10.38  | 7.54   | SHHC   |
| S6-wms-combined_113986 | 15.71  | 5.12   | 0.08  | 0.52    | 1.04   | 29.56  | 1.37   | 0.6    | 0.67  | 0.26   | 11.4   | 0.69   | Shared |
| S6-wms-combined_8508   | 63.84  | 52.31  | 6.43  | 10.47   | 65.26  | 104.53 | 43.36  | 49.5   | 49.48 | 52.31  | 48.69  | 253.49 | Shared |
| S6-wms-combined_32530  | 10.8   | 55.81  | 1.14  | 3.05    | 2      | 29.11  | 5.94   | 2.7    | 5.24  | 10.35  | 8.22   | 5.12   | Shared |
| S6-wms-combined_126236 | 115.95 | 52.47  | 26    | 18.86   | 18.62  | 71.74  | 31.4   | 57.08  | 3.05  | 53.83  | 49.03  | 138.45 | Shared |
| S6-wms-combined_50721  | 234.99 | 17.33  | 11.54 | 14      | 407.73 | 181.98 | 253.18 | 165.94 | 33.61 | 219.07 | 119.19 | 24.82  | Shared |
| S6-wms-combined_138710 | 148.71 | 61.23  | 31    | 13.48   | 52.49  | 64.5   | 22.3   | 65.23  | 3.16  | 43.48  | 48.08  | 67.98  | Shared |
| S6-wms-combined_56464  | 68.38  | 29.64  | 10.82 | 21.13   | 7.02   | 73.72  | 11.03  | 38.27  | 2.05  | 12.47  | 30.28  | 116.35 | Shared |
| S6-wms-combined_110950 | 10.38  | 2.12   | 2.38  | 0.92    | 16.31  | 54.98  | 6.13   | 4.69   | 0.95  | 4.61   | 5.6    | 3.72   | Shared |
| S6-wms-combined_128972 | 2.99   | 3.67   | 0.93  | 0.58    | 13.9   | 85.02  | 9.79   | 2.38   | 1.05  | 2.58   | 2.44   | 19.32  | Shared |
| S6-wms-combined_140731 | 5.83   | 3.06   | 0.31  | 0.6     | 2.76   | 40.12  | 2.83   | 2.22   | 4.51  | 1.1    | 2.78   | 2.5    | SHHC   |
| S6-wms-combined_91039  | 84.24  | 35.79  | 5.34  | 4.58    | 940.77 | 159.11 | 67.26  | 25.76  | 16.32 | 259.25 | 385.74 | 29.11  | Shared |
| S6-wms_54578           | 1.09   | 7.67   | 0.93  | 2.97    | 0.59   | 28.42  | 0.77   | 0.39   | 0.29  | 0.26   | 0.81   | 0.39   | SHHC   |
| S6-wms_137591          | 1.41   | 1.45   | 0.23  | 0.51    | 2.66   | 28.06  | 1.81   | 1.15   | 1.97  | 0.48   | 1.02   | 0.98   | SHHC   |
| S6-wms_132588          | 228.45 | 147.13 | 2.8   | 1.41    | 2.1    | 47.58  | 5.14   | 8.52   | 0.83  | 4.24   | 25.26  | 1.03   | Shared |
| S6-wms_138342          | 0.77   | 49.16  | 0.08  | 0.64    | 0.44   | 353.2  | 0.58   | 0.3    | 0.54  | 0.12   | 1.22   | 0.25   | SHHC   |
| S6-wms_140743          | 0.59   | 0.79   | 0.04  | 0.62    | 0.66   | 40.59  | 0.91   | 0.3    | 0.62  | 0.22   | 0.59   | 0.33   | SHHC   |
| S8-wms-combined_246389 | 6.51   | 1.37   | 0.15  | 0.55    | 1.51   | 0.55   | 1.11   | 283.01 | 0.77  | 1.03   | 1.75   | 1      | SHHC   |
| S8-wms-combined_215102 | 151.81 | 2.73   | 57.84 | 0.66    | 4.16   | 1.17   | 46.93  | 328.33 | 1.35  | 4.3    | 145.1  | 2.79   | Shared |
| S8-wms-combined_276204 | 2.66   | 1.38   | 0.14  | 0.32    | 1.97   | 0.72   | 1.13   | 273.45 | 1.06  | 0.97   | 1.71   | 1.35   | SHHC   |
| S8-wms-combined_276211 | 3.98   | 1      | 0.22  | 0.39    | 1.38   | 0.43   | 1.03   | 251.61 | 0.8   | 0.63   | 2.42   | 0.73   | SHHC   |
| S8-wms-combined_23583  | 21.88  | 4.84   | 1.56  | 1.19    | 141.65 | 20.79  | 12.2   | 111.01 | 6.92  | 18.47  | 25.26  | 5.73   | Shared |
| S8-wms-combined_81597  | 0.85   | 1.08   | 12.35 | 11.76   | 2.34   | 0.56   | 6.44   | 47.26  | 1.02  | 277.32 | 32.91  | 135.84 | Shared |
| S8-wms-combined_219796 | 1.49   | 0.87   | 0.1   | 0.26    | 1.76   | 0.47   | 0.47   | 188.07 | 0.52  | 0.66   | 15.86  | 0.97   | SHHC   |
| S8-wms-combined_185611 | 2.03   | 2.49   | 0.31  | 1       | 77.25  | 0.87   | 10.29  | 47.36  | 1.19  | 16.32  | 10.23  | 1.63   | Shared |
| S8-wms-combined_140059 | 1.58   | 1.13   | 0.11  | 0.29    | 1.44   | 0.56   | 6.25   | 57.05  | 0.51  | 0.5    | 3.34   | 0.66   | SHHC   |
| S8-wms-combined_186054 | 23.52  | 10.16  | 3.37  | 2.64    | 40.29  | 5.88   | 19.5   | 537.53 | 15.41 | 24.64  | 48.92  | 8.28   | Shared |
| S8-wms-combined_117281 | 1.8    | 1.55   | 0.26  | 0.53    | 4      | 0.84   | 10.71  | 52.79  | 1.44  | 9.31   | 7.39   | 0.84   | Shared |
| S8-wms-combined_25607  | 2.36   | 1.91   | 0.22  | 0.46    | 2.8    | 1.22   | 2.14   | 18.45  | 0.87  | 2.38   | 2.53   | 9      | SHHC   |
| S8-wms-combined_48046  | 7.38   | 3.48   | 0.79  | 0.72    | 8.31   | 1.72   | 3.92   | 68.56  | 1.84  | 3.93   | 10.5   | 3.11   | SHHC   |
| S8-wms-combined_26087  | 69.52  | 2.44   | 6.74  | 4.79    | 111.74 | 35.26  | 86.19  | 119.84 | 5.04  | 109.8  | 22.98  | 3.61   | Shared |
| S8-wms-combined_164289 | 3.6    | 1.21   | 0.19  | 0.51    | 1.23   | 0.23   | 1.12   | 30.17  | 0.4   | 0.45   | 5.43   | 0.8    | SHHC   |
| S8-wms-combined_72911  | 1.35   | 0.81   | 0.09  | 0.33    | 3.1    | 0.39   | 1.54   | 44.84  | 0.53  | 0.92   | 2.84   | 0.68   | SHHC   |
| S8-wms-combined_49369  | 39.47  | 25.1   | 6.57  | 3.72    | 5.53   | 3.4    | 39.33  | 37.92  | 1.94  | 6.26   | 8.36   | 23.75  | Shared |
| S8-wms-combined_234473 | 9.42   | 19.61  | 2.7   | 2.18    | 30.35  | 34.84  | 17.16  | 15.71  | 29.4  | 8.46   | 6.66   | 6.72   | Shared |
| S8-wms-combined_211119 | 0.91   | 0.7    | 0.07  | 0.14    | 1.06   | 0.31   | 0.72   | 125.94 | 0.51  | 0.49   | 2.5    | 0.61   | SHHC   |
| S8-wms-combined_74275  | 1.96   | 2.47   | 0.28  | 474.3   | 3.16   | 0.58   | 1.96   | 80.63  | 1.92  | 1.26   | 1.98   | 1.38   | SHHC   |
| S8-wms-combined_270362 | 50.84  | 3.22   | 4.48  | 3.73    | 68.94  | 31.21  | 49.39  | 73.83  | 6.91  | 71.84  | 24.05  | 6.66   | Shared |
| S8-wms-combined_200168 | 123.28 | 46.79  | 2.67  | 5.64    | 37.97  | 11.66  | 24.12  | 131.57 | 21.81 | 36.87  | 33.4   | 75.66  | Shared |
| S8-wms-combined_97848  | 6.47   | 7.6    | 0.32  | 1.63    | 2.24   | 0.68   | 1.13   | 41.22  | 0.61  | 1.01   | 1.96   | 4.15   | SHHC   |
| S8-wms-combined_108917 | 4.85   | 4.06   | 0.31  | 0.8     | 9.05   | 0.78   | 2.94   | 169.84 | 1.71  | 3.09   | 10.19  | 1.39   | SHHC   |
| S8-wms-combined_40666  | 51.57  | 30.38  | 4.44  | 5.38    | 169.21 | 9.75   | 53.87  | 68.33  | 47.62 | 16.15  | 25.94  | 165.13 | Shared |
| S8-wms-combined_225114 | 2.1    | 1.43   | 4.13  | 0.36    | 1.24   | 0.55   | 1.14   | 60.04  | 0.61  | 0.68   | 6.27   | 0.92   | SHHC   |
| S8-wms-combined_134098 | 6.67   | 1.13   | 0.5   | 0.31    | 3.19   | 0.62   | 1.14   | 20.78  | 0.88  | 1.3    | 3.47   | 1.28   | SHHC   |
| S8-wms-combined_180957 | 5.09   | 1.66   | 0.42  | 0.84    | 1.49   | 0.57   | 1.33   | 33.98  | 0.78  | 8.6    | 4.36   | 1.27   | SHHC   |
| S8-wms-combined_134284 | 2.1    | 1.18   | 0.18  | 0.3     | 1.89   | 0.87   | 1.29   | 22.46  | 0.84  | 2.01   | 1.9    | 1.75   | SHHC   |
| S8-wms-combined_226076 | 0.6    | 0.76   | 0.04  | 0.17    | 0.99   | 0.22   | 0.89   | 126.89 | 0.44  | 0.32   | 0.61   | 0.38   | SHHC   |
| S8-wms-combined_146562 | 1.38   | 1      | 0.06  | 0.16    | 1.76   | 0.39   | 0.69   | 173.21 | 0.67  | 0.62   | 5.09   | 0.58   | SHHC   |
| S8-wms-combined_169835 | 137.44 | 20.16  | 6.88  | 3.6     | 60.54  | 18.28  | 10.73  | 346.07 | 8.61  | 23.86  | 189.44 | 26.42  | Shared |
| S8-wms-combined_239791 | 0.72   | 0.79   | 0.05  | 0.13    | 1.35   | 0.22   | 0.81   | 38.65  | 0.72  | 0.3    | 1.08   | 0.42   | SHHC   |
| S8-wms-combined_217866 | 1.15   | 1.12   | 2.8   | 8.36    | 1.5    | 12.71  | 2.86   | 42.65  | 0.87  | 0.34   | 0.88   | 0.8    | SHHC   |
| S8-wms-combined_68780  | 17.1   | 18.98  | 0.92  | 1.21    | 4.55   | 1.69   | 3.21   | 129    | 1.83  | 22.45  | 31.65  | 4.14   | Shared |
| S8-wms-combined_161181 | 19.13  | 37.97  | 2.77  | 1.95    | 8.22   | 3.54   | 10.1   | 123.95 | 1.78  | 7.9    | 28.35  | 125.74 | Shared |
| S8-wms-combined_264711 | 1.17   | 0.94   | 0.17  | 0.19    | 1.41   | 0.41   | 0.53   | 15.42  | 0.33  | 0.64   | 1.53   | 0.94   | SHHC   |
| S8-wms-combined_246185 | 12     | 39.24  | 0.12  | 1.28    | 40.88  | 0.35   | 9.35   | 149.72 | 0.38  | 3.12   | 9.95   | 0.7    | Shared |
| S8-wms_270             | 1.92   | 6.21   | 0.07  | 0.22    | 0.79   | 0.09   | 0.29   | 40.62  | 0.39  | 0.36   | 1.11   | 0.36   | SHHC   |
| S8-wms_127191          | 0.72   | 0.86   | 0.05  | 0.36    | 0.77   | 0.14   | 0.62   | 59.49  | 0.39  | 0.26   | 0.88   | 0.32   | SHHC   |
| S8-wms_58515           | 53.11  | 37.25  | 10.68 | 7.63    | 344.14 | 39.09  | 35.92  | 97.72  | 25.88 | 163.58 | 227.58 | 94.08  | Shared |
| S8-wms_82880           | 1.37   | 9.2    | 0.14  | 0.48    | 4.05   | 1.56   | 1.09   | 36.57  | 0.79  | 15.08  | 1.39   | 2.04   | Shared |
| S8-wms_244525          | 0.55   | 0.94   | 0.03  | 0.21    | 0.43   | 0.13   | 0.79   | 28.75  | 0.55  | 0.16   | 0.66   | 0.3    | SHHC   |
| S8-wms_152831          | 9.66   | 1.33   | 3.87  | 7.71    | 1.48   | 0.41   | 1.39   | 96.76  | 0.72  | 0.9    | 17.71  | 2.56   | SHHC   |
| S8-wms_48935           | 42.68  | 8.39   | 2.94  | 2.08    | 11.69  | 6.28   | 3.88   | 290.5  | 2.56  | 7.38   | 26.77  | 9.65   | Shared |
| S8-wms_190781          | 7.91   | 0.74   | 1.23  | 0.62    | 0.75   | 0.21   | 0.66   | 34.53  | 0.57  | 0.75   | 0.67   | 0.46   | SHHC   |
| S8-wms_30498           | 2.75   | 0.73   | 0.19  | 0.19    | 1.06   | 2.19   | 1.06   | 92.76  | 0.61  | 7.67   | 11.51  | 41.97  | Shared |
| S8-wms_111056          | 0.84   | 4.77   | 0.06  | 0.48    | 0.56   | 0.19   | 0.79   | 31.96  | 0.4   | 0.14   | 0.45   | 0.28   | SHHC   |
| S8-wms_113693          | 2.75   | 1.2    | 1.67  | 0.38    | 1.71   | 0.51   | 1.25   | 16.71  | 0.34  | 0.62   | 15.97  | 0.66   | SHHC   |

|              |       |      |      |       |       |       |       |       |       |       |       |                                |
|--------------|-------|------|------|-------|-------|-------|-------|-------|-------|-------|-------|--------------------------------|
| S8-wms_20528 | 1.81  | 1.56 | 0.24 | 0.75  | 2.76  | 0.56  | 1.38  | 33.9  | 0.75  | 1.1   | 18.87 | 1.27 SHHC                      |
| S8-wms_57121 | 0.7   | 0.75 | 0.05 | 0.25  | 0.98  | 0.2   | 0.93  | 93.54 | 0.64  | 0.33  | 3.49  | 0.55 SHHC                      |
| #Total       | 45.75 | 52.2 | 3.29 | 10.86 | 61.41 | 23.04 | 49.76 | 31.39 | 16.74 | 28.29 | 42.1  | 32.49 33.11 mean<br>17.7441 SD |

Table S1-R. Euk\_virus\_detection-VIRIFY VLP:

| High_confidence_taxonomy             | genus | subfamily        | family         | order | class          | WMS:                                                    |
|--------------------------------------|-------|------------------|----------------|-------|----------------|---------------------------------------------------------|
| contig_ID                            |       |                  |                |       |                | contig_ID                                               |
| S7_vt_101751                         |       |                  | Herelleviridae |       | Caudoviricetes | S5-wms_94965                                            |
| S2_vt_20910                          |       |                  |                |       |                | S7-wms-combined_235165                                  |
| S12_vt_188832                        |       |                  |                |       |                | S11-wms-combined_299954                                 |
| S5_vt_63924                          |       |                  |                |       |                | S12-wms_386692 phage-circular                           |
| S8_vt_206526                         |       | Bastillevirinae  | Herelleviridae |       | Caudoviricetes | S7-wms-combined_223260                                  |
| S9_vt_58402                          |       |                  |                |       |                | S7-wms-combined_189250                                  |
| S11_vt_41997                         |       |                  |                |       |                | S3-wms-combined_73262                                   |
| S7_vt_122151                         |       | Nymbastervirinae |                |       | Caudoviricetes | S1-wms-combined_186878                                  |
| S10_vt_43473                         |       |                  |                |       |                | S11-wms_330479 phage-circular                           |
| S3_vt_127391                         |       |                  |                |       |                | S1-wms-combined_263562                                  |
| S7_vt_27437                          |       |                  |                |       |                | S11-wms_14390 phage-circular                            |
| S9_vt_127395                         |       |                  |                |       |                | S2-wms-combined_52568                                   |
| S9_vt_48424                          |       |                  |                |       |                | S2-wms-combined_159670                                  |
| S4_vt_12614                          |       |                  |                |       |                | S5-wms-combined_83412                                   |
| S14_vt_48775                         |       |                  |                |       |                | S17-wms-combined_158354                                 |
| S15_vt_71616                         |       |                  |                |       |                | S11-wms-combined_41367                                  |
| S12_vt_173666                        |       |                  |                |       |                | S2-wms_128831 phage-circular                            |
| S3_vt_127445                         |       |                  |                |       |                | S1-wms_244836                                           |
| S5_vt_121419                         |       |                  |                |       |                | S4-wms_62635                                            |
| S5_vt_67958                          |       |                  |                |       |                | S8-wms-combined_276204                                  |
| S14_vt_37500                         |       |                  |                |       |                | S7-wms_244866 phage-circular                            |
| S8_vt_93976                          |       |                  |                |       |                | S1-wms-combined_31456                                   |
| S3_vt_40939                          |       |                  |                |       |                | S1-wms-combined_224578                                  |
| S7_vt_138096                         |       |                  |                |       |                | S2-wms_140933                                           |
| S9_vt_75363                          |       |                  |                |       |                | S12-wms-combined_376326                                 |
| S7_vt_11081                          |       |                  |                |       |                | S1-wms_185046                                           |
| S16_vt_100378                        |       |                  |                |       |                | S5-wms_123499                                           |
| S16_vt_34751                         |       |                  |                |       |                | S9-wms-combined_2042                                    |
| S1_vt_125650                         |       |                  |                |       |                | S2-wms-combined_190624                                  |
| S6_vt_33711                          |       |                  |                |       |                | S12-wms-combined_164425                                 |
| S7_vt_26235                          |       |                  |                |       |                | S7-wms_157264                                           |
| S8_vt_393843                         |       |                  |                |       |                | S12-wms-combined_390985                                 |
| S5_vt_27918                          |       |                  |                |       |                | S6-wms_14578                                            |
| S11_vt_84303 phage-circular          |       |                  |                |       |                | S11-wms-combined_195425                                 |
| S16_vt_127669                        |       |                  |                |       |                | S7-wms-combined_121062                                  |
| S16_vt_33764                         |       |                  |                |       |                | S4-wms-combined_14411                                   |
| S3_vt_27568                          |       |                  |                |       |                | S5-wms-combined_134743                                  |
| S7_vt_120858                         |       |                  |                |       |                | S1-wms-combined_354899                                  |
| S9_vt_10424                          |       |                  |                |       |                | S11-wms-combined_117756                                 |
| S10_vt_58014                         |       |                  |                |       |                | S12-wms_15700                                           |
| S12_vt_14467                         |       |                  |                |       |                | S1-wms-combined_324053                                  |
| S2_vt_54498                          |       |                  |                |       |                | S8-wms-combined_189611                                  |
| S3_vt_12973                          |       |                  |                |       |                | S17-wms-combined_253499                                 |
| S7_vt_135679                         |       |                  |                |       |                | S1-wms_255995                                           |
| S3_vt_127406 phage-circular          |       |                  |                |       |                | S2-wms-combined_72725                                   |
| S10_vt_130738 phage-circular         |       |                  |                |       |                | S8-wms-combined_72011                                   |
| S9_vt_26179                          |       |                  |                |       |                | S1-wms-combined_394574                                  |
| S8_vt_99362                          |       |                  |                |       |                | S5-wms-combined_199135                                  |
| S2_vt_95574                          |       |                  |                |       |                | S7-wms-combined_104872                                  |
| S5_vt_74199                          |       |                  |                |       |                | S4-wms_161443                                           |
| S16_vt_116956                        |       |                  |                |       |                | S8-wms-combined_211139                                  |
| S8_vt_155553                         |       |                  |                |       |                | S8-wms-combined_97488                                   |
| S13_vt_147589 phage-circular         |       |                  |                |       |                | S12-wms_401372 phage-circular                           |
| S3_vt_30318                          |       |                  |                |       |                | S5-wms-combined_66017                                   |
| S11_vt_104042                        |       |                  |                |       |                | S8-wms-combined_226076                                  |
| S3_vt_70093                          |       |                  |                |       |                | S12-wms-combined_256299                                 |
| S9_vt_19689                          |       |                  |                |       |                | S9-wms-combined_3461                                    |
| S17_vt_157209                        |       |                  |                |       |                | S12-wms-combined_240551                                 |
| S6_vt_15813                          |       |                  |                |       |                | S5-wms_49310                                            |
| S13_vt_49889                         |       |                  |                |       |                | S2-wms-combined_246480                                  |
| S9_vt_90866 phage-circular           |       |                  |                |       |                | S8-wms-combined_134098                                  |
| S16_vt_100235                        |       |                  |                |       |                | S7-wms-combined_40779                                   |
| S11_vt_56762                         |       |                  |                |       |                | S2-wms-combined_197577                                  |
| S7_vt_138140                         |       |                  |                |       |                | S8-wms_57121                                            |
| S10_vt_67471                         |       |                  |                |       |                | S12-wms-combined_259783                                 |
| S7_vt_32559                          |       |                  |                |       |                | S12-wms_179388                                          |
| S7_vt_87439                          |       |                  |                |       |                | S6-wms-combined_65225                                   |
| S4_vt_10506 phage-circular           |       |                  |                |       |                | S12-wms_44817                                           |
| S3_vt_67828 phage-circular           |       |                  |                |       |                | S12-wms_401366 phage-circular                           |
| S11_vt_92391 phage-circular          |       |                  |                |       |                | S2-wms-combined_248318                                  |
| S3_vt_44405                          |       |                  |                |       |                | S7-wms-combined_163980                                  |
| S5_vt_6032                           |       |                  |                |       |                | S7-wms-combined_156351                                  |
| S14_vt_117160                        |       |                  |                |       |                | S5-wms_85650                                            |
| S3_vt_62410                          |       |                  |                |       |                | S1-wms_100010                                           |
| S9_vt_50439                          |       |                  |                |       |                | S17-wms-combined_225356                                 |
| S10_vt_77004                         |       |                  |                |       |                | S8-wms-combined_140059                                  |
| S11_vt_49071                         |       |                  |                |       |                | S1-wms_106115                                           |
| S5_vt_20268                          |       |                  |                |       |                | S5-wms-combined_7292                                    |
| S5_vt_9747                           |       |                  |                |       |                | S9-wms_128232 phage-circular                            |
| S14_vt_110290                        |       |                  |                |       |                | S6-wms-combined_140731                                  |
| S8_vt_176604                         |       |                  |                |       |                | S6-wms-combined_110950                                  |
| S5_vt_145592                         |       |                  |                |       |                | S6-wms-combined_745                                     |
| S7_vt_72493                          |       |                  |                |       |                | Prophages:                                              |
| S16_vt_54250                         |       |                  |                |       |                | S12-wms-combined_299293 prophage-23691                  |
| S17_vt_58025                         |       |                  |                |       |                | S11-wms-combined_193148 prophage-6157-35963             |
| S8_vt_208113                         |       |                  |                |       |                | S2-wms-combined_101826 prophage-5343-44508              |
| S13_vt_23314                         |       |                  |                |       |                | S1-wms-combined_107768 prophage-0-22406                 |
| S12_vt_128794 phage-circular         |       |                  |                |       |                | S7-wms-combined_134452 prophage-25486-63184             |
| S16_vt_80244                         |       |                  |                |       |                | S8-wms-combined_169835 prophage-33527- Arqatrovirinae   |
| S4_vt_13627                          |       |                  |                |       |                | S4-wms-combined_17284 prophage-20324-5 Arqatrovirinae   |
| S8_vt_196670                         |       |                  |                |       |                | S11-wms-combined_46816 prophage-0-26833                 |
| S1_vt_49835                          |       |                  |                |       |                | S8-wms-combined_48046 prophage-0-24520 Nymbastervirinae |
| S4_vt_31973 phage-circular           |       |                  |                |       |                | S8-wms-combined_49369 prophage-6161-39940               |
| S15_vt_1407                          |       |                  |                |       |                | S5-wms-combined_178432 prophage-475-34                  |
| S4_vt_VIRSorter_31980-circular_cat_2 |       |                  |                |       |                | S2-wms_130687 prophage-32092-69405 Nymbastervirinae     |
| S17_vt_2079                          |       |                  |                |       |                | S5-wms-combined_161191 prophage-133027-176705           |
| S17_vt_103009                        |       |                  |                |       |                | S8-wms-combined_134284 prophage-1693-26955              |
| S5_vt_136679                         |       |                  |                |       |                | S11-wms-combined_92114 prophage-753-26974               |
| S8_vt_208129                         |       |                  |                |       |                | S8-wms-combined_23583 prophage-49044-83941              |
| S8_vt_50431                          |       |                  |                |       |                | S7-wms-combined_5625 prophage-27372-66709               |
| S9_vt_88286                          |       |                  |                |       |                | S5-wms-combined_207291 prophage-13497-57653             |
| S3_vt_127442                         |       |                  |                |       |                |                                                         |

Euk\_virus\_detection-Kraken2 VLP:

| S1_vlp_ME                         | S2_vlp_SHHC                       | WMS:                          |
|-----------------------------------|-----------------------------------|-------------------------------|
| S1_vlp_ME                         | S2_vlp_SHHC                       | S1_wms_ME                     |
| Human gammaherpesvirus 4          | NA                                | Human gammaherpesvirus 4      |
| Human betaherpesvirus 7           |                                   | Human betaherpesvirus 7       |
| Human coronavirus 229E            |                                   | Human papillomavirus type 54  |
| Human papillomavirus type 13      |                                   | Human papillomavirus type 12  |
| Human papillomavirus type 131     |                                   | Human papillomavirus type 131 |
| Human papillomavirus type 156     |                                   | Human papillomavirus type 156 |
| Human parvovirus 4 G1             |                                   |                               |
| S3_vlp_ME                         | S4_vlp_SHHC                       | S3_wms_ME                     |
| Human betaherpesvirus 7           | Human gammaherpesvirus 4          | Human gammaherpesvirus 4      |
| Human gammaherpesvirus 4          | Torque teno mini virus 10         | Human betaherpesvirus 5       |
| Human papillomavirus type 34      |                                   | Human associated cytivirus 10 |
| Human papillomavirus type 85      |                                   |                               |
| Human parvovirus 4 G1             |                                   |                               |
| S5_vlp_ME                         | S6_vlp_SHHC                       | S5_wms_ME                     |
| Human betaherpesvirus 7           | Human gammaherpesvirus 4          | Human gammaherpesvirus 4      |
| Human gammaherpesvirus 4          | Torque teno mini virus 10         | Human betaherpesvirus 5       |
| Human papillomavirus type 3       | Human papillomavirus 121          | Human coronavirus 229E        |
| Human coronavirus 229E            |                                   | Human associated cytivirus 10 |
| Human papillomavirus type 112     |                                   |                               |
| S7_vlp_ME                         | S8_vlp_SHHC                       | S7_wms_ME                     |
| Human betaherpesvirus 5           | Human gammaherpesvirus 8          | Human alphaherpesvirus 1      |
| Human betaherpesvirus 6B          | Human alphaherpesvirus 3          | Human betaherpesvirus 7       |
| Human alphaherpesvirus 1          | Human alphaherpesvirus 1          | Human adenovirus 34           |
| Torque teno mini virus 4          | Human mastadenovirus D            | Human papillomavirus type 16  |
| Human papillomavirus type 85      | Human papillomavirus type 85      | Human papillomavirus 184      |
| S9_vlp_ME                         | S10_vlp_SHHC                      | S9_wms_ME                     |
| Human alphaherpesvirus 3          | Human gammaherpesvirus 4          | NA                            |
| Human gammaherpesvirus 4          | Human mastadenovirus E            |                               |
| Human papillomavirus 201          | Torque teno mini virus 10         |                               |
| S11_vlp_ME                        | S12_vlp_SHHC                      | S11_wms_ME                    |
| Human betaherpesvirus 6A          | Human betaherpesvirus 5           | Human alphaherpesvirus 1      |
| Human betaherpesvirus 6B          | Human betaherpesvirus 7           | Human betaherpesvirus 5       |
| Human gammaherpesvirus 4          | Human smacovirus 1                | Human gammaherpesvirus 4      |
| Human papillomavirus type 131     | Human associated huchimacovirus 1 | Human mastadenovirus B        |
| Human papillomavirus type 131     | Torque teno mini virus 4          | Torque teno virus 28          |
| S13_vlp_ME                        | S15_vlp_SHHC                      | S13_wms_ME                    |
| Human gammaherpesvirus 8          | Human associated huchimacovirus 1 | Torque teno mini virus 1      |
| Human lung-associated virotoxin B | Human associated huchimacovirus 1 | Human smacovirus 1            |
| Torque teno mini virus 4          | Human papillomavirus 103          | Human papillomavirus 103      |
| S14_vlp_ME                        | S16_vlp_SHHC                      | S14_wms_ME                    |
| Human alphaherpesvirus 3          | Human alphaherpesvirus 3          | Human papillomavirus 187      |
| Human papillomavirus 187          | Human papillomavirus type 34      | Human coronavirus 229E        |
| Torque teno mini virus 4          | Torque teno mini virus 4          | Human papillomavirus type 90  |
| S17_vlp_ME                        | S18_vlp_SHHC                      | S17_wms_ME                    |
| Human gammaherpesvirus 4          | Human betaherpesvirus 6B          | Human gammaherpesvirus 4      |
| Human betaherpesvirus 5           | Human betaherpesvirus 7           | Human adenovirus 54           |
| Human parvovirus 4 G1             | Human papillomavirus type 96      | Human coronavirus 229E        |
| Human adenovirus 7                | Human parvovirus 4 G1             | Human betaherpesvirus 5       |
| Human coronavirus 229E            | Human adenovirus 7                |                               |
| Torque teno mini virus 4          | Human coronavirus 229E            |                               |
| Only seen in ME samples           |                                   |                               |



|                                     |                  |                  |                |                                               |                 |
|-------------------------------------|------------------|------------------|----------------|-----------------------------------------------|-----------------|
| S7_vs_95276                         |                  |                  |                | S17-wms-combined_136622 [prophage-0.14633     |                 |
| S7_vs_32386                         |                  |                  |                | S4-wms-combined_51079 [prophage-2266:17963    |                 |
| S16_vs_140709                       |                  |                  |                | S1-wms-combined_231544 [prophage-5239-22022   |                 |
| S16_vs_1713099 [phage-circular      |                  |                  |                | S5-wms-combined_59064 [prophage-3198:77143    |                 |
| S8_vs_43483                         | Picovirinae      | Salamaviridae    | Caudoviricetes | S7-wms-combined_238231 [prophage-41175:       | 1               |
| S7_vs_138069 [phage-circular        |                  |                  |                | S12-wms-combined_134806 [prophage-1282:       | Tevenvirinae    |
| S16_vs_1037 [phage-circular         |                  |                  |                | S7-wms-combined_43950 [prophage-18667-5:      | Guernseyvirinae |
| S8_vs_117796                        | Guernseyvirinae  |                  | Caudoviricetes | S8-wms-combined_215102 [prophage-32414-64368  |                 |
| S8_vs_4883                          |                  |                  |                | S4-wms-combined_64632 [prophage-21507-57119   |                 |
| S8_vs_153696                        |                  |                  |                | S8-wms-combined_60780 [prophage-21160-7:      | Quarvirinae     |
| S17_vs_148303                       |                  |                  |                | S2-wms-combined_181391 [prophage-95287:117194 |                 |
| S3_vs_72118                         |                  |                  |                | S11-wms-combined_179605 [prophage-20178-43615 |                 |
| S16_vs_114703                       |                  |                  |                | S9-wms-combined_124857 [prophage-20824-82523  |                 |
| S15_vs_55639                        |                  |                  |                | S7-wms-combined_190281 [prophage-28470:       | Arquitrovirinae |
| S8_vs_65522                         |                  |                  |                | S2-wms-combined_181849 [prophage-3700-40213   |                 |
| S9_vs_70236                         |                  |                  |                | S7-wms-combined_14267 [prophage-23745-5:      | Tevenvirinae    |
| S4_vs_28601                         |                  |                  |                | S6-wms-combined_91039 [prophage-5888-44:      | 1               |
| S8_vs_208107 [phage-circular        |                  |                  |                |                                               | Straboviridae   |
| S4_vs_70746                         |                  |                  |                |                                               | Caudoviricetes  |
| S3_vs_87728                         |                  |                  |                |                                               | Straboviridae   |
| S8_vs_87755                         |                  |                  |                |                                               | Caudoviricetes  |
| S13_vs_147396 [phage-circular       | Tunavirinae      | Drexelviriidae   | Caudoviricetes |                                               |                 |
| S14_vs_30108                        |                  | 1                |                |                                               |                 |
| S2_vs_3356                          |                  |                  |                |                                               |                 |
| S5_vs_83886                         |                  | 1                | 1              |                                               |                 |
| S16_vs_75108                        | Spounavirinae    | Herelleviridae   | Caudoviricetes |                                               |                 |
| S3_vs_90341                         | Spounavirinae    | Herelleviridae   | Caudoviricetes |                                               |                 |
| S12_vs_48045                        |                  | 2 Herelleviridae | Caudoviricetes |                                               |                 |
| S16_vs_173102                       |                  |                  |                |                                               |                 |
| S7_vs_103530                        |                  |                  |                |                                               |                 |
| S12_vs_188825                       |                  |                  |                |                                               |                 |
| S10_vs_57705                        |                  |                  |                |                                               |                 |
| S5_vs_145633                        |                  |                  |                |                                               |                 |
| S7_vs_129271                        | Nymbastevirinae  |                  | Caudoviricetes |                                               |                 |
| S8_vs_154231                        | Nymbastevirinae  |                  | Caudoviricetes |                                               |                 |
| S7_vs_136828                        |                  |                  |                |                                               |                 |
| S4_vs_2524                          |                  |                  |                |                                               |                 |
| S11_vs_78275                        |                  |                  |                |                                               |                 |
| S9_vs_23901 [phage-circular         |                  |                  |                |                                               |                 |
| S5_vs_139401                        |                  |                  |                |                                               |                 |
| S5_vs_130476                        |                  |                  |                |                                               |                 |
| S8_vs_105008                        |                  |                  |                |                                               |                 |
| S2_vs_10289                         |                  |                  |                |                                               |                 |
| S8_vs_134943                        |                  |                  |                |                                               |                 |
| S13_vs_121307                       |                  |                  |                |                                               |                 |
| S8_vs_71212                         |                  |                  |                |                                               |                 |
| S4_vs_18803 [phage-circular         |                  |                  |                |                                               |                 |
| S5_vs_129970                        |                  |                  |                |                                               |                 |
| S1_vs_28398                         |                  |                  |                |                                               |                 |
| S8_vs_166403                        |                  |                  |                |                                               |                 |
| S9_vs_45812                         | Arquitrovirinae  |                  | Caudoviricetes |                                               |                 |
| S16_vs_100473                       |                  |                  |                |                                               |                 |
| S14_vs_117164 [phage-circular       |                  |                  |                |                                               |                 |
| S16_vs_140468                       |                  |                  |                |                                               |                 |
| S15_vs_76390                        | Tunavirinae      | Drexelviriidae   | Caudoviricetes |                                               |                 |
| S13_vs_96887                        |                  |                  |                |                                               |                 |
| S7_vs_36627                         |                  |                  |                |                                               |                 |
| S12_vs_188833                       | Arquitrovirinae  |                  | Caudoviricetes |                                               |                 |
| S5_vs_4717                          | Arquitrovirinae  |                  | Caudoviricetes |                                               |                 |
| S12_vs_188822 [phage-circular       |                  |                  |                |                                               |                 |
| S4_vs_4891                          |                  |                  |                |                                               |                 |
| S8_vs_208111 [phage-circular        |                  |                  |                |                                               |                 |
| S5_vs_123990                        | Picovirinae      | Salamaviridae    | Caudoviricetes |                                               |                 |
| S3_vs_81793                         | Twortvirinae     | Herelleviridae   | Caudoviricetes |                                               |                 |
| S10_vs_18671 [phage-circular        |                  |                  |                |                                               |                 |
| S5_vs_37659                         | Arquitrovirinae  |                  | Caudoviricetes |                                               |                 |
| S12_vs_99219                        |                  | 1 Herelleviridae | Caudoviricetes |                                               |                 |
| S7_vs_14275                         |                  |                  |                |                                               |                 |
| S10_vs_71900                        | Tunavirinae      | Drexelviriidae   | Caudoviricetes |                                               |                 |
| S6_vs_56493                         |                  |                  |                |                                               |                 |
| S16_vs_84462 [phage-circular        | Twortvirinae     | Herelleviridae   | Caudoviricetes |                                               |                 |
| S7_vs_138116                        | Sepvirinae       |                  | Caudoviricetes |                                               |                 |
| S16_vs_35031                        |                  |                  |                |                                               |                 |
| S1_vs_138157                        |                  |                  |                |                                               |                 |
| S16_vs_76823                        |                  |                  |                |                                               |                 |
| S7_vs_42563                         |                  |                  |                |                                               |                 |
| S1_vs_145792                        |                  |                  |                |                                               |                 |
| S14_vs_112252                       |                  |                  |                |                                               |                 |
| S5_vs_120079                        | Nymbastevirinae  |                  | Caudoviricetes |                                               |                 |
| S5_vs_140946                        | Sepvirinae       |                  | Caudoviricetes |                                               |                 |
| S9_vs_63485                         | Bastillevirinae  | Herelleviridae   | Caudoviricetes |                                               |                 |
| S7_vs_76463                         | Nymbastevirinae  |                  | Caudoviricetes |                                               |                 |
| S17_vs_127519                       |                  |                  |                |                                               |                 |
| S5_vs_850                           | Nymbastevirinae  |                  | Caudoviricetes |                                               |                 |
| S10_vs_36598                        |                  |                  |                |                                               |                 |
| S5_vs_74661                         | Sepvirinae       |                  | Caudoviricetes |                                               |                 |
| S12_vs_10887 [phage-circular        |                  |                  |                |                                               |                 |
| S8_vs_208102 [phage-circular        | Tevenvirinae     | Straboviridae    | Caudoviricetes |                                               |                 |
| S3_vs_89485                         |                  |                  |                |                                               |                 |
| S15_vs_120644                       |                  |                  |                |                                               |                 |
| S13_vs_113593                       |                  |                  |                |                                               |                 |
| S16_vs_120149                       |                  |                  |                |                                               |                 |
| S1_vs_22149                         |                  |                  |                |                                               |                 |
| S4_vs_VBSorter_16493-cat_2          | Nymbastevirinae  |                  | Caudoviricetes |                                               |                 |
| S17_vs_43307                        | Arquitrovirinae  |                  | Caudoviricetes |                                               |                 |
| S5_vs_145026                        |                  |                  |                |                                               |                 |
| S16_vs_164913                       | Picovirinae      | Salamaviridae    | Caudoviricetes |                                               |                 |
| S10_vs_18501                        | Sepvirinae       |                  | Caudoviricetes |                                               |                 |
| S7_vs_117697                        |                  | 1 Straboviridae  | Caudoviricetes |                                               |                 |
| S5_vs_136076                        | Nymbastevirinae  |                  | Caudoviricetes |                                               |                 |
| S8_vs_51368                         |                  |                  |                |                                               |                 |
| S16_vs_17493                        |                  |                  |                |                                               |                 |
| S9_vs_73111 [phage-circular         |                  | 1 Herelleviridae | Caudoviricetes |                                               |                 |
| S11_vs_58930                        |                  |                  |                |                                               |                 |
| S5_vs_77701                         | Mccleskeyvirinae |                  | Caudoviricetes |                                               |                 |
| S16_vs_10622 [phage-circular        |                  |                  |                |                                               |                 |
| S4_vs_VBSorter_31196-circular_cat_2 |                  |                  |                |                                               |                 |
| S3_vs_25096                         |                  |                  |                |                                               |                 |
| S15_vs_27510                        | Onnavirinae      |                  | Caudoviricetes |                                               |                 |
| S10_vs_120489                       |                  |                  |                |                                               |                 |
| S16_vs_108554                       |                  |                  |                |                                               |                 |
| S12_vs_187941                       | Tunavirinae      | Drexelviriidae   | Caudoviricetes |                                               |                 |
| S9_vs_26805 [phage-circular         |                  |                  |                |                                               |                 |
| S14_vs_44452                        |                  |                  |                |                                               |                 |
| S3_vs_119660                        |                  |                  |                |                                               |                 |

|                                      |                  |                |               |                    |
|--------------------------------------|------------------|----------------|---------------|--------------------|
| S5_vs_13254                          |                  |                |               |                    |
| S4_vf_13831                          |                  |                |               |                    |
| S5_vs_117417                         |                  |                |               |                    |
| S11_vs_36748                         |                  |                |               |                    |
| S8_vf_94361                          | Gokushovirinae   | Microviridae   | Petitivirales | Malgrandaviricetes |
| S4_vs_VIRSorter_15112-cat_2          | Nymbastervirinae |                |               | Caudoviricetes     |
| S11_vs_104032                        |                  |                |               |                    |
| S12_vs_121913                        |                  |                |               |                    |
| S10_vf_113489                        |                  |                |               |                    |
| S9_vf_15012                          |                  |                |               |                    |
| S3_vs_77156                          |                  |                |               |                    |
| S7_vs_43529                          |                  |                |               |                    |
| S9_vf_57277 phage-circular           |                  |                |               |                    |
| S11_vs_89911                         | Tevenvirinae     | Straboviridae  |               | Caudoviricetes     |
| S7_vf_11744                          |                  |                |               |                    |
| S7_vf_89648                          |                  |                |               |                    |
| S9_vs_127411                         |                  |                |               |                    |
| S11_vs_104054                        | Nymbastervirinae |                |               | Caudoviricetes     |
| S16_vs_4662                          |                  |                |               |                    |
| S14_vs_90934                         |                  |                |               |                    |
| S7_vs_55031                          |                  |                |               |                    |
| S4_vs_VIRSorter_9913-cat_1           |                  |                |               |                    |
| S8_vs_176720                         |                  |                |               |                    |
| S17_vf_77057                         |                  |                |               |                    |
| S3_vs_70508                          |                  |                |               |                    |
| S3_vs_14858                          |                  |                |               |                    |
| S5_vs_1572                           |                  |                |               |                    |
| S9_vf_79919 phage-circular           |                  | 1              |               |                    |
| S17_vs_177196                        | Nymbastervirinae |                |               | Caudoviricetes     |
| S5_vs_145591                         |                  |                |               |                    |
| S7_vs_136164                         | Nymbastervirinae |                |               | Caudoviricetes     |
| S5_vf_110171 phage-circular          |                  |                |               |                    |
| S5_vf_28061 phage-circular           |                  |                |               |                    |
| S7_vs_27530                          | Ounavirinae      |                |               | Caudoviricetes     |
| S12_vs_26847                         | Nymbastervirinae |                |               | Caudoviricetes     |
| S14_vs_61530                         | Nymbastervirinae |                |               | Caudoviricetes     |
| S5_vs_113186                         | Bastillevirinae  | Herelleviridae |               | Caudoviricetes     |
| S8_vs_5211                           | Arquatrovirinae  |                |               | Caudoviricetes     |
| S17_vf_172132                        |                  |                |               |                    |
| S5_vs_1338                           |                  |                |               |                    |
| S16_vf_173100 phage-circular         | McCleskeyvirinae |                |               | Caudoviricetes     |
| S16_vf_173133 phage-circular         |                  |                |               |                    |
| S8_vs_72117                          |                  |                |               |                    |
| S16_vs_51901                         |                  |                |               |                    |
| S11_vs_75554                         | Picovirinae      | Salasmaviridae |               | Caudoviricetes     |
| S11_vs_93101                         | Tunavirinae      | Drexleviridae  |               | Caudoviricetes     |
| S8_vf_102508                         | Nymbastervirinae |                |               | Caudoviricetes     |
| S16_vs_127905                        |                  |                |               |                    |
| S4_vs_VIRSorter_31976-circular-cat_2 |                  |                |               |                    |
| S8_vf_84832                          |                  |                |               |                    |
| S9_vf_4155                           | Klosneuvirinae   | Mimiviridae    | Imitervirales | Megaviricetes      |
| S5_vf_103206                         |                  |                |               |                    |
| S8_vf_183045 phage-circular          |                  |                |               |                    |
| S6_vs_32886                          |                  |                |               |                    |
| S5_vf_38011                          |                  |                |               |                    |
| S14_vs_101482                        |                  |                |               |                    |
| S9_vs_21850                          | Guernseyvirinae  |                |               | Caudoviricetes     |
| S5_vf_145586 phage-circular          | Sepvirinae       |                |               | Caudoviricetes     |
| S16_vs_103726                        | Nymbastervirinae |                |               | Caudoviricetes     |
| S12_vf_173208                        |                  |                |               |                    |
| S8_vs_204260                         |                  |                |               |                    |
| S12_vs_28661                         |                  |                |               |                    |
| S7_vf_69348                          |                  |                |               |                    |
| S14_vs_3251                          |                  |                |               |                    |
| S11_vs_8456                          | Nymbastervirinae |                |               | Caudoviricetes     |
| S12_vs_151292                        | Guernseyvirinae  |                |               | Caudoviricetes     |
| S9_vs_88847                          |                  |                |               |                    |
| S3_vs_1031                           | Arquatrovirinae  |                |               | Caudoviricetes     |
| S14_vf_114491                        |                  |                |               |                    |
| S12_vf_126151 phage-circular         | Tevenvirinae     | Straboviridae  |               | Caudoviricetes     |
| S4_vs_VIRSorter_13488-cat_2          | Arquatrovirinae  |                |               | Caudoviricetes     |
| S7_vs_30665                          |                  |                |               |                    |
| S13_vs_87108                         |                  |                |               |                    |
| S6_vs_56492                          |                  |                |               |                    |
| S4_vs_VIRSorter_6022-circular-cat_1  |                  |                |               |                    |
| S7_vf_134023 phage-circular          |                  |                |               |                    |
| S12_vs_111815                        | Tunavirinae      | Drexleviridae  |               | Caudoviricetes     |
| S7_vf_29186                          | Nymbastervirinae |                |               | Caudoviricetes     |
| S7_vs_137998                         |                  |                |               |                    |
| S5_vs_13090                          | Nymbastervirinae |                |               | Caudoviricetes     |
| S5_vf_116300                         |                  | 1              |               |                    |
| S5_vs_122618                         |                  |                |               |                    |
| S11_vf_95067 phage-circular          |                  |                |               |                    |
| S8_vs_142097                         |                  |                |               |                    |
| S8_vf_55476 phage-circular           |                  |                |               |                    |
| S9_vs_4343                           |                  |                |               |                    |
| S5_vf_60587 phage-circular           | Twortvirinae     | Herelleviridae | 1             | Caudoviricetes     |
| S6_vf_24563                          |                  |                |               |                    |
| S11_vs_23188                         |                  |                |               |                    |
| S17_vs_138036                        |                  |                |               |                    |
| S13_vf_87873                         |                  |                |               |                    |
| S3_vf_127168                         | Picovirinae      | Salasmaviridae |               | Caudoviricetes     |
| S3_vs_50924                          |                  |                |               |                    |
| S14_vf_117157 phage-circular         |                  |                |               |                    |
| S7_vs_20200                          | Bastillevirinae  | Herelleviridae |               | Caudoviricetes     |
| S11_vs_14882                         |                  |                |               |                    |
| S16_vs_141218                        | Nymbastervirinae |                |               | Caudoviricetes     |
| S1_vs_145928                         |                  |                |               |                    |
| S9_vs_83108                          |                  |                |               |                    |
| S14_vf_109545                        |                  |                |               |                    |
| S5_vs_145593                         | Nymbastervirinae |                |               | Caudoviricetes     |
| S9_vs_90857                          | Sepvirinae       |                |               | Caudoviricetes     |
| S6_vf_25710                          |                  |                |               |                    |
| S12_vs_188828                        |                  |                |               |                    |
| S5_vs_8947                           | Bastillevirinae  | Herelleviridae |               | Caudoviricetes     |
| S17_vf_177197 phage-circular         |                  |                |               |                    |
| S10_vs_37379                         |                  |                |               |                    |
| S8_vf_79769 phage-circular           |                  |                |               |                    |
| S16_vf_32359                         |                  |                |               |                    |
| S7_vs_944                            |                  |                |               |                    |
| S16_vf_96483                         |                  |                |               |                    |
| S3_vs_73361                          |                  |                |               |                    |
| S3_vs_114271                         | Arquatrovirinae  |                |               | Caudoviricetes     |
| S16_vs_59697                         |                  |                |               |                    |
| S7_vs_54322                          |                  |                |               |                    |

|                                |                  |                  |                    |
|--------------------------------|------------------|------------------|--------------------|
| S5_vs_17520                    |                  | Salasmaviridae   | Caudoviricetes     |
| S7_vs_118295                   |                  |                  |                    |
| S11_vs_81775                   | 1                |                  |                    |
| S11_vf_68693                   |                  |                  |                    |
| S13_vf_109235 [phage-circular] | Nymbastervirinae |                  | Caudoviricetes     |
| S11_vs_98193                   |                  |                  |                    |
| S3_vf_57422                    |                  |                  |                    |
| S16_vf_5809                    | Nymbastervirinae |                  | Caudoviricetes     |
| S12_vf_8173                    |                  |                  |                    |
| S17_vf_79151                   | Picovirinae      | Salasmaviridae   | Caudoviricetes     |
| S11_vs_42927                   |                  | 1 Herelleviridae | Caudoviricetes     |
| S13_vf_56074 [phage-circular]  |                  |                  |                    |
| S11_vs_55144                   |                  | 1                |                    |
| S3_vs_28402                    | Nclavirinae      |                  | Caudoviricetes     |
| S10_vs_36407                   |                  |                  |                    |
| S14_vs_117166                  | Nclavirinae      |                  | Caudoviricetes     |
| S17_vs_73830                   | Nclavirinae      |                  | Caudoviricetes     |
| S14_vf_78139                   |                  | 1 Pimascovirales | Megaviricetes      |
| S13_vs_152223                  |                  | 1                |                    |
| S5_vs_124411                   |                  | 1                |                    |
| S3_vs_127404                   |                  |                  |                    |
| S7_vs_56529                    |                  |                  |                    |
| S10_vs_120541                  | Spounavirinae    | Herelleviridae   | Caudoviricetes     |
| S11_vs_84627                   | Sepvirinae       |                  | Caudoviricetes     |
| S12_vs_94042                   |                  |                  |                    |
| S12_vs_138261                  | Ounavirinae      |                  | Caudoviricetes     |
| S3_vf_5525                     | Arquatrovirinae  |                  | Caudoviricetes     |
| S3_vf_108959 [phage-circular]  |                  | 1                |                    |
| S8_vf_7243                     |                  |                  |                    |
| S6_vs_22637                    |                  |                  |                    |
| S11_vs_38860                   |                  | 1                |                    |
| S14_vf_106156                  | Sepvirinae       |                  | Caudoviricetes     |
| S11_vf_66522                   | Arquatrovirinae  |                  | Caudoviricetes     |
| S5_vs_138168                   | Nymbastervirinae |                  | Caudoviricetes     |
| S8_vf_201695                   | Twortvirinae     | Herelleviridae   | Caudoviricetes     |
| S13_vf_38708                   | Ounavirinae      |                  | Caudoviricetes     |
| S16_vs_136935                  |                  |                  |                    |
| S7_vs_28150                    |                  |                  |                    |
| S8_vs_132359                   |                  |                  |                    |
| S11_vs_6458                    |                  |                  |                    |
| S12_vs_141337                  |                  |                  |                    |
| S12_vs_188823                  |                  |                  |                    |
| S5_vs_41663                    |                  | 1 Herelleviridae | Caudoviricetes     |
| S1_vs_89898                    |                  |                  |                    |
| S3_vf_127450 [phage-circular]  |                  |                  |                    |
| S8_vs_175235                   |                  |                  |                    |
| S11_vs_104038                  |                  |                  |                    |
| S5_vs_145581                   | Arquatrovirinae  |                  | Caudoviricetes     |
| S7_vs_100640                   |                  |                  |                    |
| S13_vs_26756                   | Guernseyvirinae  |                  | Caudoviricetes     |
| S15_vf_2513 [phage-circular]   | Sepvirinae       |                  | Caudoviricetes     |
| S14_vf_72953                   |                  |                  |                    |
| S5_vs_128881                   |                  |                  |                    |
| S16_vf_52513                   | Arquatrovirinae  |                  | Caudoviricetes     |
| S8_vf_12212                    |                  |                  |                    |
| S8_vs_9114                     |                  |                  |                    |
| S10_vf_64371 [phage-circular]  |                  |                  |                    |
| S10_vs_120570                  | Nymbastervirinae |                  | Caudoviricetes     |
| S12_vf_174374                  |                  | 2 Straboviridae  | Caudoviricetes     |
| S11_vs_84848                   |                  |                  |                    |
| S5_vs_56083                    | Arquatrovirinae  |                  | Caudoviricetes     |
| S4_vf_13759                    |                  |                  |                    |
| S14_vs_79505                   |                  |                  |                    |
| S1_vs_2435                     |                  |                  |                    |
| S11_vs_104037                  |                  |                  |                    |
| S11_vs_53675                   | Picovirinae      | Salasmaviridae   | Caudoviricetes     |
| S13_vs_83447                   |                  |                  |                    |
| S12_vf_145044                  |                  |                  |                    |
| S4_vf_16485                    |                  |                  |                    |
| S14_vf_99344                   |                  |                  |                    |
| S5_vf_145585 [phage-circular]  |                  |                  |                    |
| S11_vs_79831                   | Arquatrovirinae  |                  | Caudoviricetes     |
| S9_vf_19284 [phage-circular]   |                  |                  |                    |
| S7_vf_138019 [phage-circular]  | Nymbastervirinae |                  | Caudoviricetes     |
| S12_vf_79666                   |                  |                  |                    |
| S1_vs_91270                    |                  | 1 Salasmaviridae | Caudoviricetes     |
| S9_vs_30849                    | Spounavirinae    | Herelleviridae   | Caudoviricetes     |
| S7_vs_78507                    | Bastillevirinae  | Herelleviridae   | Caudoviricetes     |
| S11_vf_33117 [phage-circular]  | Ounavirinae      |                  | Caudoviricetes     |
| S8_vs_3224                     | Bastillevirinae  | Herelleviridae   | Caudoviricetes     |
| S8_vf_208146 [phage-circular]  | Gokushovirinae   | Microviridae     | Petitvirales       |
| S4_vf_31978 [phage-circular]   |                  |                  | Malgrandaviricetes |
| S5_vs_28263                    |                  |                  |                    |
| S6_vf_83536                    |                  |                  |                    |
| S14_vs_112068                  | Sepvirinae       |                  | Caudoviricetes     |
| S7_vs_50194                    |                  |                  |                    |
| S13_vf_91189                   |                  |                  |                    |
| S16_vs_173096                  |                  |                  |                    |
| S12_vs_188820                  | Tunavirinae      | Drexleviridae    | Caudoviricetes     |
| S7_vs_55526                    | Arquatrovirinae  |                  | Caudoviricetes     |
| S14_vs_4887                    |                  |                  |                    |
| S3_vs_97827                    |                  |                  |                    |
| S9_vs_69322                    |                  |                  |                    |
| S6_vf_18080                    |                  | 1                |                    |
| S6_vf_6314                     | Picovirinae      | Salasmaviridae   | Caudoviricetes     |
| S12_vs_164056                  |                  | 1                |                    |
| S9_vs_75290                    | Picovirinae      | Salasmaviridae   | Caudoviricetes     |
| S11_vs_5277                    |                  |                  |                    |
| S12_vs_111286                  |                  |                  |                    |
| S9_vs_14235                    | Sepvirinae       |                  | Caudoviricetes     |
| S2_vs_7306                     |                  |                  |                    |
| S7_vs_134391                   |                  |                  |                    |
| S3_vf_2186 [phage-circular]    |                  |                  |                    |
| S16_vf_94866                   | Arquatrovirinae  |                  | Caudoviricetes     |
| S16_vs_64584                   |                  |                  |                    |
| S11_vf_27845                   |                  |                  |                    |
| S7_vs_2599                     |                  |                  |                    |
| S13_vs_9438                    |                  |                  |                    |
| S14_vs_38905                   |                  |                  |                    |
| S11_vf_99751                   |                  |                  |                    |
| S6_vs_38250                    | Nymbastervirinae |                  | Caudoviricetes     |
| S3_vf_127423 [phage-circular]  | Dclavirinae      |                  | Caudoviricetes     |
| S8_vf_197061                   |                  |                  |                    |
| S8_vs_40014                    |                  |                  |                    |
| S11_vs_67573                   | Spounavirinae    | Herelleviridae   | Caudoviricetes     |

|                                       |                   |                |
|---------------------------------------|-------------------|----------------|
| S5_vs_84574                           |                   |                |
| S3_vs_39774                           |                   |                |
| S5_vs_147128                          |                   |                |
| S7_vs_67910                           | Arquatrovirinae   | Caudoviricetes |
| Prophages:                            |                   |                |
| S3_vs_9158   prophage-2555:27661      |                   |                |
| S16_vs_34021   prophage-329:31534     | Nymphaetervirinae | Caudoviricetes |
| S3_vs_64424   prophage-0:35145        |                   |                |
| S5_vs_21778   prophage-2234:115733    |                   |                |
| S12_vs_26336   prophage-15751:67092   | Spounavirinae     | Herelleviridae |
| S8_vs_28956   prophage-122:25469      |                   | Caudoviricetes |
| S12_vs_22796   prophage-0:38478       |                   |                |
| S14_vs_74067   prophage-149012:246138 |                   |                |
| S8_vs_125717   prophage-33527:52956   | Arquatrovirinae   | Caudoviricetes |
| S6_vs_39065   prophage-7045:41823     |                   |                |
| S14_vs_96111   prophage-2661:24193    | 1 Herelleviridae  | Caudoviricetes |
| S10_vs_80712   prophage-0:96675       | Eucampyvirinae    | Caudoviricetes |
| S5_vs_46394   prophage-32694:43444    | Arquatrovirinae   | Caudoviricetes |
| S5_vs_205257   prophage-1642:48926    |                   |                |
| S13_vs_33947   prophage-0:26846       |                   |                |
| S15_vs_35445   prophage-0:15628       |                   |                |
| S12_vs_123620   prophage-0:84060      |                   |                |
| S10_vs_80712   prophage-105587:116981 |                   |                |
| S5_vs_80496   prophage-58056:120254   | Ounavirinae       | Caudoviricetes |
| S5_vs_123256   prophage-34087:71380   |                   |                |
| S12_vs_172379   prophage-0:134462     |                   |                |
| S6_vs_9784   prophage-7737:47646      | Ounavirinae       | Caudoviricetes |
| S3_vs_45147   prophage-6666:74355     |                   |                |
| S5_vs_76500   prophage-2854:36602     |                   |                |
| S5_vs_142195   prophage-0:48595       | Spounavirinae     | Herelleviridae |
| S16_vs_107235   prophage-0:30582      |                   | Caudoviricetes |
| S5_vs_30490   prophage-37846:56501    | Nymphaetervirinae | Caudoviricetes |
| S9_vs_13507   prophage-32195:121541   |                   |                |
| S7_vs_97737   prophage-47165:74627    |                   |                |
| S13_vs_67429   prophage-29606:89258   |                   |                |
| S16_vs_10968   prophage-21941:54417   |                   |                |
| S14_vs_112345   prophage-26622:38263  |                   |                |
| S15_vs_42043   prophage-69410:193243  |                   |                |
| S5_vs_130294   prophage-21515:43034   |                   |                |
