# Supplementary material for: Investigating the Human Intestinal DNA Virome and Predicting Disease-Associated Virus–Host Interactions in Severe Myalgic Encephalomyelitis/Chronic Fatigue Syndrome (ME/CFS)
Source: MDPI journal article supplement (doi:10.3390/ijms242417267), 2023-12-08
Supplement: s1 [file s1]

TableS9. Host predictions

Table S9-1. VLP\_prediction\_STD+MAGs

| Virus         | AAI to closest RaFAH reference | Host genus                                                                                             |
|---------------|--------------------------------|--------------------------------------------------------------------------------------------------------|
| S10_vf_120738 | 22.73                          | d_Bacteria;p_Firmicutes;c_Clostridia;o_Oscillospirales;f_Oscillospiraceae;g_Dysosmobacter              |
| S10_vf_120738 | 22.73                          | d_Bacteria;p_Firmicutes;c_Clostridia;o_Oscillospirales;f_Oscillospiraceae;g_Intestinimonas             |
| S10_vf_18671  | 91.64                          | d_Bacteria;p_Bacteroidota;c_Bacteroidia;o_Bacteroidales;f_Tannerellaceae;g_Parabacteroides             |
| S10_vf_24791  | 46.17                          | d_Bacteria;p_Firmicutes;c_Clostridia;o_Oscillospirales;f_Ruminococcaceae;g_Faecalibacterium            |
| S10_vf_43964  | 91.64                          | d_Bacteria;p_Bacteroidota;c_Bacteroidia;o_Bacteroidales;f_Bacteroidaceae;g_Bacteroides                 |
| S10_vf_43964  | 91.64                          | d_Bacteria;p_Bacteroidota;c_Bacteroidia;o_Bacteroidales;f_Bacteroidaceae;g_Phocaeicola                 |
| S10_vf_46328  | 63.06                          | d_Bacteria;p_Firmicutes;c_Clostridia;o_Lachnospirales;f_Lachnospiraceae;g_UBA9502                      |
| S10_vf_62230  | 25.76                          | d_Bacteria;p_Firmicutes;c_Clostridia;o_Clostridiales;f_Clostridiaceae;g_Clostridium                    |
| S10_vf_64371  | 86.67                          | d_Bacteria;p_Firmicutes;c_Bacilli;o_Lactobacillales;f_Streptococcaceae;g_Streptococcus                 |
| S10_vf_80712  | 98.13                          | d_Bacteria;p_Firmicutes;c_Clostridia;o_Lachnospirales;f_Lachnospiraceae;g_Blautia_A                    |
| S10_vf_80712  | 98.13                          | d_Bacteria;p_Firmicutes;c_Clostridia;o_Lachnospirales;f_Lachnospiraceae;g_Blautia                      |
| S10_vs_106834 | 44.85                          | d_Bacteria;p_Bacteroidota;c_Bacteroidia;o_Bacteroidales;f_Bacteroidaceae;g_Bacteroides                 |
| S10_vs_120489 | 7.64                           | d_Bacteria;p_Firmicutes;c_Clostridia;o_Christensenellales;f_Borfiakaceae;g_QALS01                      |
| S10_vs_120541 | 14.85                          | d_Bacteria;p_Firmicutes;c_Clostridia;o_Oscillospirales;f_Oscillospiraceae;g_CAG-110                    |
| S10_vs_120570 | 98.22                          | d_Bacteria;p_Firmicutes;c_Clostridia;o_Oscillospirales;f_Ruminococcaceae;g_Ruminococcus_D              |
| S10_vs_14557  | 99.66                          | d_Bacteria;p_Bacteroidota;c_Bacteroidia;o_Bacteroidales;f_Bacteroidaceae;g_Bacteroides                 |
| S10_vs_2538   | 31.92                          | d_Bacteria;p_Firmicutes;c_Clostridia;o_Peptostreptococcales;f_Anaerovoracaceae;g_CAG-145               |
| S10_vs_35854  | 48.73                          | d_Bacteria;p_Bacteroidota;c_Bacteroidia;o_Bacteroidales;f_Bacteroidaceae;g_Bacteroides                 |
| S10_vs_35854  | 48.73                          | d_Bacteria;p_Bacteroidota;c_Bacteroidia;o_Bacteroidales;f_Bacteroidaceae;g_Phocaeicola                 |
| S10_vs_36407  | 8.93                           | d_Bacteria;p_Firmicutes;c_Clostridia;o_Oscillospirales;f_Acutalibacteraceae;g_UBA1691                  |
| S10_vs_36598  | 93.41                          | d_Bacteria;p_Bacteroidota;c_Bacteroidia;o_Bacteroidales;f_Bacteroidaceae;g_Bacteroides                 |
| S10_vs_36598  | 93.41                          | d_Bacteria;p_Bacteroidota;c_Bacteroidia;o_Bacteroidales;f_Bacteroidaceae;g_Phocaeicola                 |
| S10_vs_37379  | 75.26                          | d_Bacteria;p_Bacteroidota;c_Bacteroidia;o_Bacteroidales;f_Tannerellaceae;g_Parabacteroides             |
| S10_vs_37694  | 99.94                          | d_Bacteria;p_Bacteroidota;c_Bacteroidia;o_Bacteroidales;f_Rikenellaceae;g_Alistipes                    |
| S10_vs_46819  | 98.03                          | d_Bacteria;p_Firmicutes;c_Clostridia;o_Oscillospirales;f_Ruminococcaceae;g_Faecalibacterium            |
| S10_vs_58014  | 85.85                          | d_Bacteria;p_Bacteroidota;c_Bacteroidia;o_Bacteroidales;f_Bacteroidaceae;g_Bacteroides                 |
| S10_vs_58014  | 85.85                          | d_Bacteria;p_Bacteroidota;c_Bacteroidia;o_Bacteroidales;f_Bacteroidaceae;g_Phocaeicola                 |
| S10_vs_62776  | 44.54                          | d_Bacteria;p_Bacteroidota;c_Bacteroidia;o_Bacteroidales;f_Bacteroidaceae;g_Bacteroides                 |
| S10_vs_62776  | 44.54                          | d_Bacteria;p_Bacteroidota;c_Bacteroidia;o_Bacteroidales;f_Bacteroidaceae;g_Phocaeicola                 |
| S10_vs_67471  | 98.13                          | d_Bacteria;p_Bacteroidota;c_Bacteroidia;o_Bacteroidales;f_Rikenellaceae;g_Alistipes                    |
| S10_vs_67471  | 98.13                          | d_Bacteria;p_Bacteroidota;c_Bacteroidia;o_Bacteroidales;f_Rikenellaceae;g_Alistipes_A                  |
| S10_vs_71900  | 97                             | d_Bacteria;p_Bacteroidota;c_Bacteroidia;o_Bacteroidales;f_Bacteroidaceae;g_Bacteroides                 |
| S10_vs_71900  | 97                             | d_Bacteria;p_Bacteroidota;c_Bacteroidia;o_Bacteroidales;f_Bacteroidaceae;g_Phocaeicola                 |
| S10_vs_71900  | 97                             | d_Bacteria;p_Bacteroidota;c_Bacteroidia;o_Bacteroidales;f_Bacteroidaceae;g_OM05-12                     |
| S10_vs_77004  | 10.42                          | d_Bacteria;p_Firmicutes;c_Clostridia;o_Oscillospirales;f_Acutalibacteraceae;g_Pseudoruminococcus       |
| S11_vf_104033 | 40.07                          | d_Bacteria;p_Bacteroidota;c_Bacteroidia;o_Bacteroidales;f_Bacteroidaceae;g_Bacteroides                 |
| S11_vf_104034 | 21.95                          | d_Bacteria;p_Firmicutes;c_Clostridia;o_Oscillospirales;f_Oscillospiraceae;g_ER4                        |
| S11_vf_104035 | 37.57                          | d_Bacteria;p_Bacteroidota;c_Bacteroidia;o_Bacteroidales;f_Bacteroidaceae;g_Prevotella                  |
| S11_vf_104035 | 37.57                          | d_Bacteria;p_Spirochaetota;c_Spirochaetia;o_Sphaerochaetiales;f_Sphaerochaetaceae;g_UBA9732            |
| S11_vf_104052 | 38.91                          | d_Bacteria;p_Firmicutes;c_Clostridia;o_Oscillospirales;f_Acutalibacteraceae;g_CAG-180                  |
| S11_vf_104071 | 20.29                          | d_Bacteria;p_Bacteroidota;c_Bacteroidia;o_Bacteroidales;f_Rikenellaceae;g_Alistipes                    |
| S11_vf_10907  | 87.86                          | d_Bacteria;p_Firmicutes;c_Clostridia;o_Lachnospirales;f_Lachnospiraceae;g_Bariatricus                  |
| S11_vf_27845  | 53.78                          | d_Bacteria;p_Firmicutes;c_Bacilli;o_Lactobacillales;f_Streptococcaceae;g_Streptococcus                 |
| S11_vf_27845  | 53.78                          | d_Bacteria;p_Bacteroidota;c_Bacteroidia;o_Flavobacteriales;f_Flavobacteriaceae;g_Capnocytophaga        |
| S11_vf_28515  | 95.85                          | d_Bacteria;p_Firmicutes;c_Clostridia;o_Lachnospirales;f_Lachnospiraceae;g_Blautia_A                    |
| S11_vf_28515  | 95.85                          | d_Bacteria;p_Firmicutes;c_Clostridia;o_Lachnospirales;f_Lachnospiraceae;g_Blautia                      |
| S11_vf_28645  | 6.84                           | d_Bacteria;p_Firmicutes;c_Clostridia;o_Lachnospirales;f_Lachnospiraceae;g_Blautia_A                    |
| S11_vf_33117  | 96.79                          | d_Bacteria;p_Firmicutes;c_Clostridia;o_Oscillospirales;f_Oscillospiraceae;g_CAG-83                     |
| S11_vf_33117  | 96.79                          | d_Bacteria;p_Firmicutes;c_Clostridia;o_Oscillospirales;f_Oscillospiraceae;g_Dysosmobacter              |
| S11_vf_33117  | 96.79                          | d_Bacteria;p_Firmicutes;c_Clostridia;o_Oscillospirales;f_Oscillospiraceae;g_Flavonifractor             |
| S11_vf_34008  | 44.72                          | d_Bacteria;p_Firmicutes;c_Clostridia;o_Lachnospirales;f_Lachnospiraceae;g_                             |
| S11_vf_34008  | 44.72                          | d_Bacteria;p_Firmicutes;c_Clostridia;o_Lachnospirales;f_Lachnospiraceae;g_UC5-1-2E3                    |
| S11_vf_43997  | 15.72                          | d_Bacteria;p_Bacteroidota;c_Bacteroidia;o_Bacteroidales;f_Bacteroidaceae;g_Bacteroides                 |
| S11_vf_58587  | 11.86                          | d_Bacteria;p_Actinobacteriota;c_Actinomycetia;o_Actinomycetales;f_Bifidobacteriaceae;g_Bifidobacterium |
| S11_vf_66522  | 97.65                          | d_Bacteria;p_Actinobacteriota;c_Actinomycetia;o_Actinomycetales;f_Actinomycetaceae;g_Pauljensenia      |
| S11_vf_66522  | 97.65                          | d_Bacteria;p_Actinobacteriota;c_Actinomycetia;o_Actinomycetales;f_Actinomycetaceae;g_Actinomycetes     |
| S11_vf_68693  | 78.63                          | d_Bacteria;p_Bacteroidota;c_Bacteroidia;o_Bacteroidales;f_Tannerellaceae;g_Parabacteroides             |
| S11_vf_70015  | 50.35                          | d_Bacteria;p_Bacteroidota;c_Bacteroidia;o_Bacteroidales;f_Rikenellaceae;g_Alistipes                    |
| S11_vf_92391  | 5.33                           | d_Bacteria;p_Firmicutes;c_Bacilli;o_Erysipelotrichales;f_Erysipelotrichaceae;g_Clostridium_AQ          |
| S11_vf_95067  | 39.9                           | d_Bacteria;p_Firmicutes;c_Clostridia;o_Oscillospirales;f_Oscillospiraceae;g_Flavonifractor             |
| S11_vf_99751  | 8.04                           | d_Bacteria;p_Firmicutes;c_Clostridia;o_Oscillospirales;f_Oscillospiraceae;g_CAG-83                     |
| S11_vs_104041 | 16.5                           | d_Bacteria;p_Cyanobacteria;c_Vampirovibronia;o_Gastranaerophilales;f_Gastranaerophilaceae;g_CAG-306    |
| S11_vs_104042 | 75.46                          | d_Bacteria;p_Firmicutes;c_Clostridia;o_Lachnospirales;f_Lachnospiraceae;g_Eubacterium_I                |
| S11_vs_104064 | 99.03                          | d_Bacteria;p_Firmicutes;c_Clostridia;o_Oscillospirales;f_Ruminococcaceae;g_Negativibacillus            |
| S11_vs_11994  | 21.97                          | d_Bacteria;p_Firmicutes;c_Clostridia;o_Oscillospirales;f_Ruminococcaceae;g_Faecalibacterium            |
| S11_vs_13652  | 57.92                          | d_Bacteria;p_Firmicutes;c_Clostridia;o_Oscillospirales;f_Ruminococcaceae;g_Massilioclostridium         |
| S11_vs_14882  | 11.87                          | d_Bacteria;p_Firmicutes;c_Bacilli;o_Erysipelotrichales;f_Erysipelotrichaceae;g_Holdemania              |
| S11_vs_1937   | 99.04                          | d_Bacteria;p_Bacteroidota;c_Bacteroidia;o_Bacteroidales;f_Rikenellaceae;g_Alistipes                    |
| S11_vs_1937   | 99.04                          | d_Bacteria;p_Bacteroidota;c_Bacteroidia;o_Bacteroidales;f_Rikenellaceae;g_Alistipes_A                  |
| S11_vs_19892  | 45.95                          | d_Bacteria;p_Firmicutes;c_Clostridia;o_Oscillospirales;f_Oscillospiraceae;g_Lawsonibacter              |
| S11_vs_23188  | 66.52                          | d_Bacteria;p_Bacteroidota;c_Bacteroidia;o_Bacteroidales;f_Bacteroidaceae;g_Bacteroides                 |
| S11_vs_26767  | 40.78                          | d_Bacteria;p_Firmicutes;c_Clostridia;o_Lachnospirales;f_Lachnospiraceae;g_Ventrimonas                  |

| Confidence score | List of methods                                     |
|------------------|-----------------------------------------------------|
| 95               | blast;96.50 iPhoP-RF;71.90                          |
| 93.5             | blast;95.40 iPhoP-RF;64.00                          |
| 91               | blast;93.40 iPhoP-RF;79.00                          |
| 93.8             | blast;95.60 CRISPR;94.10 iPhoP-RF;82.20             |
| 100              | RaFAH;99.20 CRISPR;97.80 iPhoP-RF;97.10 blast;77.70 |
| 98.2             | CRISPR;98.70 iPhoP-RF;97.10 blast;92.80             |
| 91.4             | CRISPR;93.70 blast;91.80 iPhoP-RF;89.50             |
| 90.6             | blast;93.00 iPhoP-RF;61.40                          |
| 98.8             | RaFAH;98.90 iPhoP-RF;59.80                          |
| 100              | RaFAH;99.20 blast;91.30 iPhoP-RF;86.30              |
| 99               | RaFAH;99.20                                         |
| 92.3             | RaFAH;87.20 iPhoP-RF;78.70                          |
| 90.3             | blast;92.80 iPhoP-RF;56.50                          |
| 94.7             | blast;96.30 iPhoP-RF;95.70 CRISPR;74.70             |
| 99.7             | blast;98.90 iPhoP-RF;96.70 CRISPR;87.50 RaFAH;87.40 |
| 100              | RaFAH;98.20 iPhoP-RF;97.10 blast;96.90 CRISPR;90.30 |
| 94.3             | blast;96.00 iPhoP-RF;76.40                          |
| 99.3             | iPhoP-RF;97.10 blast;96.00 RaFAH;90.40              |
| 91.4             | iPhoP-RF;93.70                                      |
| 94.5             | blast;96.70 CRISPR;90.70 iPhoP-RF;73.00             |
| 100              | RaFAH;99.40 iPhoP-RF;96.70                          |
| 95.9             | iPhoP-RF;97.10 blast;95.40                          |
| 100              | CRISPR;98.90 RaFAH;98.30 iPhoP-RF;97.10 blast;94.80 |
| 99.1             | iPhoP-RF;97.10 blast;96.80 RaFAH;87.90 CRISPR;55.60 |
| 99.4             | blast;96.80 RaFAH;92.90 iPhoP-RF;79.00              |
| 100              | RaFAH;99.50 blast;91.80 iPhoP-RF;64.00              |
| 94.6             | blast;96.20 iPhoP-RF;76.40                          |
| 99               | iPhoP-RF;96.70 blast;93.60 RaFAH;88.20              |
| 92.6             | iPhoP-RF;94.70 blast;84.90                          |
| 99.9             | RaFAH;97.30 blast;95.30 iPhoP-RF;52.20              |
| 96.2             | RaFAH;97.30                                         |
| 100              | RaFAH;99.30 iPhoP-RF;97.10 blast;90.90              |
| 95.9             | iPhoP-RF;97.10 blast;96.20 CRISPR;95.50             |
| 91               | iPhoP-RF;93.40                                      |
| 95.3             | blast;96.70 CRISPR;89.20 iPhoP-RF;87.60             |
| 90.6             | RaFAH;93.00                                         |
| 90.3             | blast;92.80 iPhoP-RF;81.10                          |
| 91.7             | RaFAH;94.00                                         |
| 90               | blast;92.50 iPhoP-RF;70.20                          |
| 91.5             | blast;93.80 iPhoP-RF;55.40                          |
| 98.5             | CRISPR;98.90 iPhoP-RF;92.80                         |
| 91.6             | blast;93.90 iPhoP-RF;82.80                          |
| 100              | CRISPR;98.80 RaFAH;97.70 iPhoP-RF;85.70             |
| 91               | blast;93.40 iPhoP-RF;51.20                          |
| 100              | RaFAH;98.80 blast;94.40 iPhoP-RF;90.50 CRISPR;68.00 |
| 98.4             | RaFAH;98.80                                         |
| 92.5             | blast;94.60 iPhoP-RF;51.70                          |
| 97.3             | RaFAH;98.10                                         |
| 97.3             | RaFAH;98.10                                         |
| 93.8             | blast;95.60 iPhoP-RF;71.50                          |
| 93.1             | iPhoP-RF;95.10 blast;93.90                          |
| 91.6             | blast;93.90 iPhoP-RF;93.10                          |
| 91.4             | blast;93.70 iPhoP-RF;78.70                          |
| 90.4             | blast;92.90 iPhoP-RF;65.60                          |
| 100              | RaFAH;99.20 CRISPR;99.10 blast;93.90 iPhoP-RF;90.50 |
| 99               | RaFAH;99.20                                         |
| 99.3             | CRISPR;97.70 blast;97.30 iPhoP-RF;91.80 RaFAH;87.20 |
| 97.8             | blast;96.10 RaFAH;79.90                             |
| 91               | CRISPR;93.40                                        |
| 93.4             | blast;95.30 iPhoP-RF;58.20                          |
| 94.9             | blast;96.40 iPhoP-RF;57.10                          |
| 97.2             | blast;98.00 iPhoP-RF;56.00                          |
| 98.1             | blast;98.60 iPhoP-RF;84.80                          |
| 92.1             | blast;94.30                                         |
| 91.7             | RaFAH;94.00                                         |
| 92.9             | blast;94.90 iPhoP-RF;66.50                          |
| 93.1             | blast;95.10 CRISPR;54.60                            |
| 100              | blast;98.60 RaFAH;96.60 iPhoP-RF;83.30              |
| 95.2             | RaFAH;96.60                                         |
| 90.6             | blast;93.00 iPhoP-RF;67.50                          |
| 99.9             | iPhoP-RF;97.10 RaFAH;95.80 blast;93.80 CRISPR;83.30 |
| 90.8             | blast;93.20 iPhoP-RF;72.20                          |

S11\_vs\_3006  
S11\_vs\_3277  
S11\_vs\_34137  
S11\_vs\_36748  
S11\_vs\_38860  
S11\_vs\_41107  
S11\_vs\_41107  
S11\_vs\_41107  
S11\_vs\_45658  
S11\_vs\_45658  
S11\_vs\_48109  
S11\_vs\_5077  
S11\_vs\_5077  
S11\_vs\_5077  
S11\_vs\_52577  
S11\_vs\_55144  
S11\_vs\_58930  
S11\_vs\_58930  
S11\_vs\_6458  
S11\_vs\_67573  
S11\_vs\_68151  
S11\_vs\_68151  
S11\_vs\_68348  
S11\_vs\_6878  
S11\_vs\_76784  
S11\_vs\_79831  
S11\_vs\_81775  
S11\_vs\_82331  
S11\_vs\_82368  
S11\_vs\_83666  
S11\_vs\_84627  
S11\_vs\_84848  
S11\_vs\_84848  
S11\_vs\_98193  
S12\_vf\_105542  
S12\_vf\_10887  
S12\_vf\_10887  
S12\_vf\_10887  
S12\_vf\_10887  
S12\_vf\_10887  
S12\_vf\_10887  
S12\_vf\_145044  
S12\_vf\_16374  
S12\_vf\_16374  
S12\_vf\_170614  
S12\_vf\_173208  
S12\_vf\_173666  
S12\_vf\_173666  
S12\_vf\_174374  
S12\_vf\_174374  
S12\_vf\_176437  
S12\_vf\_181024  
S12\_vf\_181024  
S12\_vf\_188846  
S12\_vf\_18902  
S12\_vf\_60224  
S12\_vf\_60224  
S12\_vf\_61299  
S12\_vf\_69136  
S12\_vf\_69136  
S12\_vf\_79666  
S12\_vs\_111286  
S12\_vs\_121913  
S12\_vs\_123620  
S12\_vs\_133070  
S12\_vs\_138261  
S12\_vs\_141337  
S12\_vs\_142625  
S12\_vs\_151292  
S12\_vs\_151292  
S12\_vs\_153780  
S12\_vs\_163990  
S12\_vs\_163990  
S12\_vs\_163990  
S12\_vs\_164056

44.36 d\_Bacteria;p\_Firmicutes;c\_Clostridia;o\_Oscillospirales;f\_Acutalibacteraceae;g\_UMGS263  
99.63 d\_Bacteria;p\_Bacteroidota;c\_Bacteroidia;o\_Bacteroidales;f\_Bacteroidaceae;g\_Bacteroides  
17.51 d\_Bacteria;p\_Firmicutes;c\_Clostridia;o\_Lachnospirales;f\_Lachnospiraceae;g\_Blaustia\_A  
49.79 d\_Bacteria;p\_Bacteroidota;c\_Bacteroidia;o\_Bacteroidales;f\_Rikenellaceae;g\_Alistipes  
39.67 d\_Bacteria;p\_Firmicutes;c\_Clostridia;o\_Lachnospirales;f\_Lachnospiraceae;g\_Enterocloster  
98.96 d\_Bacteria;p\_Firmicutes;c\_Clostridia;o\_Clostridiales;f\_Clostridiaceae;g\_Clostridium  
98.96 d\_Bacteria;p\_Firmicutes;c\_Clostridia;o\_Clostridiales;f\_Clostridiaceae;g\_Clostridium\_F  
98.96 d\_Bacteria;p\_Firmicutes;c\_Clostridia;o\_Clostridiales;f\_Clostridiaceae;g\_Clostridium\_P  
40.35 d\_Bacteria;p\_Bacteroidota;c\_Bacteroidia;o\_Bacteroidales;f\_Bacteroidaceae;g\_Bacteroides  
40.35 d\_Bacteria;p\_Bacteroidota;c\_Bacteroidia;o\_Bacteroidales;f\_UBA11471;g\_UBA11471  
63.66 d\_Bacteria;p\_Firmicutes;c\_Clostridia;o\_Oscillospirales;f\_Acutalibacteraceae;g\_An172  
84.31 d\_Bacteria;p\_Proteobacteria;c\_Gammaproteobacteria;o\_Enterobacteriales;f\_Enterobacteriaceae;g\_Salmonella  
84.31 d\_Bacteria;p\_Proteobacteria;c\_Gammaproteobacteria;o\_Enterobacteriales;f\_Enterobacteriaceae;g\_Escherichia  
84.31 d\_Bacteria;p\_Proteobacteria;c\_Gammaproteobacteria;o\_Enterobacteriales;f\_Enterobacteriaceae;g\_Enterobacter  
78.49 d\_Bacteria;p\_Firmicutes;c\_Clostridia;o\_Oscillospirales;f\_Oscillospiraceae;g\_Dysosmobacter  
12.8 d\_Bacteria;p\_Firmicutes;c\_Bacilli;o\_Erysipelotrichales;f\_Erysipelatoclostridiaceae;g\_Massiliomicrobiota  
93.75 d\_Bacteria;p\_Bacteroidota;c\_Bacteroidia;o\_Bacteroidales;f\_Bacteroidaceae;g\_Bacteroides  
93.75 d\_Bacteria;p\_Bacteroidota;c\_Bacteroidia;o\_Bacteroidales;f\_Bacteroidaceae;g\_Paraprevotella  
15.38 d\_Bacteria;p\_Proteobacteria;c\_Alphaproteobacteria;o\_RF32;f\_CAG-239;g\_CAG-267  
11.32 d\_Bacteria;p\_Firmicutes;c\_Clostridia;o\_Lachnospirales;f\_Lachnospiraceae;g\_Enterocloster  
99.98 d\_Bacteria;p\_Firmicutes;c\_Clostridia;o\_Lachnospirales;f\_Lachnospiraceae;g\_Mediterraneibacter  
99.98 d\_Bacteria;p\_Firmicutes;c\_Clostridia;o\_Lachnospirales;f\_Lachnospiraceae;g\_Hungatella  
49.51 d\_Bacteria;p\_Firmicutes;c\_Bacilli;o\_Erysipelotrichales;f\_Erysipelatoclostridiaceae;g\_Erysipelatoclostridium  
72.71 d\_Bacteria;p\_Firmicutes;c\_Clostridia;o\_Lachnospirales;f\_Lachnospiraceae;g\_  
41.57 d\_Bacteria;p\_Firmicutes;c\_Clostridia;o\_Oscillospirales;f\_Ruminococcaceae;g\_Ruthenibacterium  
17.3 d\_Bacteria;p\_Bacteroidota;c\_Bacteroidia;o\_Bacteroidales;f\_UBA11471;g\_UBA11471  
24.35 d\_Bacteria;p\_Firmicutes;c\_Clostridia;o\_Eubacteriales;f\_Eubacteriaceae;g\_Eubacterium  
98.94 d\_Bacteria;p\_Cyanobacteria;c\_Vampirovibrionia;o\_Gastranaerophilales;f\_Gastranaerophilaceae;g\_QAM101  
62.18 d\_Bacteria;p\_Firmicutes;c\_Clostridia;o\_Lachnospirales;f\_Blaustia\_A  
35.28 d\_Bacteria;p\_Firmicutes;c\_Clostridia;o\_Lachnospirales;f\_Lachnospiraceae;g\_Dorea\_A  
6.74 d\_Bacteria;p\_Proteobacteria;c\_Alphaproteobacteria;o\_RF32;f\_CAG-239;g\_51-20  
95.91 d\_Bacteria;p\_Bacteroidota;c\_Bacteroidia;o\_Bacteroidales;f\_Bacteroidaceae;g\_Bacteroides  
95.91 d\_Bacteria;p\_Bacteroidota;c\_Bacteroidia;o\_Bacteroidales;f\_Tannerellaceae;g\_Parabacteroides  
80.02 d\_Bacteria;p\_Bacteroidota;c\_Bacteroidia;o\_Bacteroidales;f\_Rikenellaceae;g\_Alistipes  
13.83 d\_Bacteria;p\_Firmicutes;c\_Bacilli;o\_RF39;f\_UBA660;g\_CAG-460  
7.67 d\_Bacteria;p\_Proteobacteria;c\_Gammaproteobacteria;o\_Enterobacteriales;f\_Pasteurellaceae;g\_Glaesserella  
7.67 d\_Bacteria;p\_Proteobacteria;c\_Gammaproteobacteria;o\_Enterobacteriales;f\_Pasteurellaceae;g\_Bibersteinia  
7.67 d\_Bacteria;p\_Proteobacteria;c\_Gammaproteobacteria;o\_Enterobacteriales;f\_Pasteurellaceae;g\_Nicoletella  
7.67 d\_Bacteria;p\_Proteobacteria;c\_Gammaproteobacteria;o\_Enterobacteriales;f\_Pasteurellaceae;g\_Muribacter  
7.67 d\_Bacteria;p\_Proteobacteria;c\_Gammaproteobacteria;o\_Enterobacteriales;f\_Pasteurellaceae;g\_Actinobacillus  
7.67 d\_Bacteria;p\_Proteobacteria;c\_Gammaproteobacteria;o\_Enterobacteriales;f\_Pasteurellaceae;g\_Actinobacillus\_C  
7.67 d\_Bacteria;p\_Proteobacteria;c\_Gammaproteobacteria;o\_Enterobacteriales;f\_Pasteurellaceae;g\_Mannheimia  
32.93 d\_Bacteria;p\_Bacteroidota;c\_Bacteroidia;o\_Bacteroidales;f\_Rikenellaceae;g\_Alistipes\_A  
100 d\_Bacteria;p\_Bacteroidota;c\_Bacteroidia;o\_Bacteroidales;f\_Bacteroidaceae;g\_Bacteroides  
100 d\_Bacteria;p\_Bacteroidota;c\_Bacteroidia;o\_Bacteroidales;f\_Tannerellaceae;g\_Parabacteroides  
7.03 d\_Bacteria;p\_Actinobacteriota;c\_Coriobacteriia;o\_Coriobacteriales;f\_Coriobacteriaceae;g\_Collinsella  
10.29 d\_Bacteria;p\_Firmicutes;c\_Clostridia;o\_Oscillospirales;f\_Oscillospiraceae;g\_CAG-170  
36.83 d\_Bacteria;p\_Actinobacteriota;c\_Coriobacteriia;o\_Coriobacteriales;f\_Eggerthellaceae;g\_Adlercreutzia  
36.83 d\_Bacteria;p\_Actinobacteriota;c\_Coriobacteriia;o\_Coriobacteriales;f\_Coriobacteriaceae;g\_Collinsella  
94.2 d\_Bacteria;p\_Bacteroidota;c\_Bacteroidia;o\_Bacteroidales;f\_Rikenellaceae;g\_Alistipes  
94.2 d\_Bacteria;p\_Bacteroidota;c\_Bacteroidia;o\_Bacteroidales;f\_Bacteroidaceae;g\_Bacteroides  
10.68 d\_Bacteria;p\_Firmicutes;c\_Clostridia;o\_Lachnospirales;f\_Lachnospiraceae;g\_OF09-33XD  
98.48 d\_Bacteria;p\_Firmicutes;c\_Clostridia;o\_Oscillospirales;f\_Ruminococcaceae;g\_Ruminococcus\_D  
98.48 d\_Bacteria;p\_Firmicutes;c\_Clostridia;o\_Oscillospirales;f\_Acutalibacteraceae;g\_Ruminococcus\_E  
d\_Bacteria;p\_Bacteroidota;c\_Bacteroidia;o\_Bacteroidales;f\_Barnesiellaceae;g\_Barnesiella  
80.1 d\_Bacteria;p\_Firmicutes;c\_Clostridia;o\_Oscillospirales;f\_Oscillospiraceae;g\_ER4  
82.87 d\_Bacteria;p\_Bacteroidota;c\_Bacteroidia;o\_Bacteroidales;f\_Bacteroidaceae;g\_Bacteroides  
82.87 d\_Bacteria;p\_Bacteroidota;c\_Bacteroidia;o\_Bacteroidales;f\_Bacteroidaceae;g\_Paraprevotella  
11.99 d\_Bacteria;p\_Firmicutes;c\_Clostridia;o\_Lachnospirales;f\_Lachnospiraceae;g\_Muricomes  
51.25 d\_Bacteria;p\_Bacteroidota;c\_Bacteroidia;o\_Bacteroidales;f\_Bacteroidaceae;g\_Prevotellamassilia  
51.25 d\_Bacteria;p\_Bacteroidota;c\_Bacteroidia;o\_Bacteroidales;f\_Bacteroidaceae;g\_Paraprevotella  
99.55 d\_Bacteria;p\_Firmicutes;c\_Clostridia;o\_Oscillospirales;f\_Acutalibacteraceae;g\_UBA1417  
44.45 d\_Bacteria;p\_Bacteroidota;c\_Bacteroidia;o\_Bacteroidales;f\_Muribaculaceae;g\_UBA7173  
82.73 d\_Bacteria;p\_Bacteroidota;c\_Bacteroidia;o\_Bacteroidales;f\_Rikenellaceae;g\_Alistipes  
10.35 d\_Bacteria;p\_Firmicutes;c\_Bacilli;o\_RF39;f\_UBA660;g\_CAG-302  
14.52 d\_Bacteria;p\_Firmicutes;c\_Clostridia;o\_Oscillospirales;f\_Ruminococcaceae;g\_CAG-353  
70.17 d\_Bacteria;p\_Bacteroidota;c\_Bacteroidia;o\_Bacteroidales;f\_Tannerellaceae;g\_Parabacteroides  
98.55 d\_Bacteria;p\_Bacteroidota;c\_Bacteroidia;o\_Bacteroidales;f\_Bacteroidaceae;g\_Bacteroides  
31.03 d\_Bacteria;p\_Bacteroidota;c\_Bacteroidia;o\_Bacteroidales;f\_Rikenellaceae;g\_Alistipes  
99.81 d\_Bacteria;p\_Bacteroidota;c\_Bacteroidia;o\_Bacteroidales;f\_Bacteroidaceae;g\_Bacteroides  
99.81 d\_Bacteria;p\_Bacteroidota;c\_Bacteroidia;o\_Bacteroidales;f\_Bacteroidaceae;g\_Phocaeicola  
97.5 d\_Bacteria;p\_Proteobacteria;c\_Alphaproteobacteria;o\_RF32;f\_CAG-239;g\_CAG-495  
99.19 d\_Bacteria;p\_Firmicutes;c\_Clostridia;o\_Lachnospirales;f\_Lachnospiraceae;g\_Dorea  
99.19 d\_Bacteria;p\_Firmicutes;c\_Clostridia;o\_Lachnospirales;f\_Lachnospiraceae;g\_Dorea\_A  
99.19 d\_Bacteria;p\_Firmicutes;c\_Clostridia;o\_Oscillospirales;f\_Oscillospiraceae;g\_ER4  
11.8 d\_Bacteria;p\_Firmicutes;c\_Clostridia;o\_Oscillospirales;f\_Oscillospiraceae;g\_CAG-83

93.6 blast;95.50 iPhoP-RF;67.00  
99.9 RaFAH;98.80 iPhoP-RF;83.60 blast;80.70  
91.4 blast;93.70 iPhoP-RF;83.10  
98.5 CRISPR;98.90 blast;96.70 iPhoP-RF;91.80  
95.2 CRISPR;96.60 blast;95.90 iPhoP-RF;89.80  
93.6 RaFAH;95.50  
93.6 RaFAH;95.50  
93.6 RaFAH;95.50  
95 RaFAH;96.20 iPhoP-RF;53.60  
90 blast;92.50 iPhoP-RF;77.50  
93.4 blast;95.30 iPhoP-RF;74.60  
95.3 blast;96.70  
94.6 blast;96.20  
93.9 blast;95.70 iPhoP-RF;60.10  
91 blast;88.40 iPhoP-RF;73.50 RaFAH;71.60  
90.3 blast;92.80  
98.1 blast;92.60 RaFAH;90.60 iPhoP-RF;89.80  
90 blast;92.50  
90.1 blast;92.60 iPhoP-RF;81.90  
92.9 CRISPR;94.90 blast;92.10 iPhoP-RF;92.10  
95.3 blast;96.70  
94.7 blast;87.90 RaFAH;84.60 iPhoP-RF;53.30  
95.2 blast;96.60 iPhoP-RF;64.50  
91 blast;93.40 iPhoP-RF;73.00  
93 blast;95.00 iPhoP-RF;77.30  
90 blast;92.50 iPhoP-RF;73.20  
95 CRISPR;96.50 blast;93.70 iPhoP-RF;81.40  
93.1 blast;95.10  
98.1 blast;92.60 RaFAH;90.70 iPhoP-RF;86.00  
90.9 blast;93.30 iPhoP-RF;67.70  
95.6 blast;96.90 iPhoP-RF;89.50 CRISPR;76.50  
95.9 blast;91.20 RaFAH;83.50 iPhoP-RF;57.90  
93.2 blast;92.10 CRISPR;86.70 iPhoP-RF;83.10 RaFAH;69.90  
96.2 iPhoP-RF;92.10 blast;92.00 RaFAH;82.70  
94.6 blast;96.20 iPhoP-RF;73.70  
94.5 iPhoP-RF;96.10 CRISPR;91.90  
93.9 iPhoP-RF;95.70  
93.9 iPhoP-RF;95.70  
93.5 iPhoP-RF;95.40  
92.2 iPhoP-RF;94.40  
92.2 iPhoP-RF;94.40  
91.8 iPhoP-RF;94.10  
91.6 blast;93.90 iPhoP-RF;77.10  
100 RaFAH;99.10 iPhoP-RF;97.10 blast;94.80  
92.9 blast;94.90  
96.4 CRISPR;97.50 iPhoP-RF;95.10  
93 blast;95.00 iPhoP-RF;81.40  
93.1 blast;95.10 iPhoP-RF;76.40  
92.6 CRISPR;94.70  
96.2 CRISPR;97.30 iPhoP-RF;97.10 blast;96.60  
91.6 RaFAH;93.90  
95.3 CRISPR;96.70 iPhoP-RF;82.20  
99.9 CRISPR;97.30 RaFAH;97.20 blast;96.90 iPhoP-RF;95.70  
96 RaFAH;97.20  
94.5 blast;96.10 iPhoP-RF;68.60  
90.6 blast;93.00 iPhoP-RF;67.00  
100 RaFAH;97.10 iPhoP-RF;96.70 blast;80.90  
91.2 blast;93.60  
96.9 CRISPR;97.80 iPhoP-RF;59.20  
98.4 CRISPR;98.80 blast;82.30 iPhoP-RF;78.30  
90.8 blast;93.20 iPhoP-RF;67.50  
91.7 blast;94.00 iPhoP-RF;58.20  
91.6 blast;93.90 iPhoP-RF;62.50  
98.5 blast;96.70 RaFAH;83.70  
95.4 blast;96.80 iPhoP-RF;64.80  
91.1 blast;93.50 iPhoP-RF;79.80  
98.4 blast;98.80 CRISPR;97.40 iPhoP-RF;96.10  
100 RaFAH;99.40 blast;92.10 iPhoP-RF;57.90  
95.9 iPhoP-RF;97.10 blast;96.90  
100 RaFAH;98.90 iPhoP-RF;97.10 blast;95.90 CRISPR;68.40  
95.9 iPhoP-RF;97.10 blast;93.30 CRISPR;74.50  
90.9 blast;93.30 iPhoP-RF;81.60  
99.3 RaFAH;99.40  
99.3 RaFAH;99.40  
95 blast;96.50 iPhoP-RF;60.30  
95.9 blast;97.10 iPhoP-RF;72.60

S12\_vs\_172379  
S12\_vs\_188820  
S12\_vs\_188828  
S12\_vs\_1980  
S12\_vs\_1980  
S12\_vs\_23796  
S12\_vs\_26336  
S12\_vs\_26336  
S12\_vs\_26847  
S12\_vs\_32669  
S12\_vs\_48045  
S12\_vs\_48045  
S12\_vs\_6836  
S12\_vs\_71525  
S12\_vs\_71525  
S12\_vs\_74280  
S12\_vs\_81729  
S12\_vs\_86928  
S12\_vs\_87088  
S12\_vs\_92868  
S12\_vs\_93357  
S12\_vs\_94042  
S12\_vs\_94042  
S12\_vs\_98175  
S12\_vs\_99092  
S12\_vs\_99219  
S12\_vs\_99219  
S13\_vf\_109235  
S13\_vf\_11246  
S13\_vf\_143422  
S13\_vf\_147589  
S13\_vf\_150407  
S13\_vf\_151045  
S13\_vf\_28309  
S13\_vf\_54201  
S13\_vf\_54201  
S13\_vf\_56074  
S13\_vf\_56074  
S13\_vf\_56074  
S13\_vf\_66508  
S13\_vf\_7670  
S13\_vf\_87873  
S13\_vs\_113593  
S13\_vs\_121307  
S13\_vs\_13129  
S13\_vs\_148294  
S13\_vs\_148294  
S13\_vs\_148294  
S13\_vs\_149860  
S13\_vs\_15645  
S13\_vs\_26756  
S13\_vs\_30101  
S13\_vs\_35816  
S13\_vs\_35816  
S13\_vs\_45488  
S13\_vs\_45488  
S13\_vs\_57267  
S13\_vs\_67429  
S13\_vs\_83447  
S13\_vs\_83447  
S13\_vs\_90967  
S13\_vs\_9438  
S14\_vf\_106156  
S14\_vf\_106156  
S14\_vf\_106156  
S14\_vf\_106156  
S14\_vf\_109545  
S14\_vf\_115736  
S14\_vf\_115736  
S14\_vf\_117147  
S14\_vf\_117150  
S14\_vf\_117150  
S14\_vf\_117155  
S14\_vf\_117155  
S14\_vf\_117157  
S14\_vf\_117157  
S14\_vf\_117162  
18.46 d\_Bacteria;p\_Firmicutes;c\_Bacilli;o\_RF39;f\_UBA660;g\_CAG-877  
7.83 d\_Bacteria;p\_Firmicutes;c\_Clostridia;o\_Oscillospirales;f\_CAG-272;g\_QALR01  
8.93 d\_Bacteria;p\_Firmicutes;c\_Clostridia;o\_Oscillospirales;f\_UMGS1783g\_UMGS1783  
94.44 d\_Bacteria;p\_Bacteroidota;c\_Bacteroidia;o\_Bacteroidales;f\_Bacteroidaceae;g\_Bacteroides  
94.44 d\_Bacteria;p\_Bacteroidota;c\_Bacteroidia;o\_Bacteroidales;f\_Bacteroidaceae;g\_Phocaeicola  
72.14 d\_Bacteria;p\_Bacteroidota;c\_Bacteroidia;o\_Bacteroidales;f\_Rikenellaceae;g\_Alistipes  
100 d\_Bacteria;p\_Bacteroidota;c\_Bacteroidia;o\_Bacteroidales;f\_Bacteroidaceae;g\_Bacteroides  
100 d\_Bacteria;p\_Bacteroidota;c\_Bacteroidia;o\_Bacteroidales;f\_Rikenellaceae;g\_Alistipes  
68.45 d\_Bacteria;p\_Firmicutes;c\_Clostridia;o\_Lachnospirales;f\_Lachnospiraceae;g\_Lachnospira  
3.93 d\_Bacteria;p\_Firmicutes;c\_Clostridia;o\_Christensenellales;f\_CAG-917;g\_CAG-475  
24.79 d\_Bacteria;p\_Firmicutes;c\_Clostridia;o\_Christensenellales;f\_CAG-74;g\_UBA11524  
24.79 d\_Bacteria;p\_Firmicutes;c\_Clostridia;o\_Christensenellales;f\_CAG-74;g\_UBA11524  
43.21 d\_Bacteria;p\_Firmicutes;c\_Clostridia;o\_TANB77;f\_CAG-508;g\_CAG-269  
30.6 d\_Bacteria;p\_Bacteroidota;c\_Bacteroidia;o\_Bacteroidales;f\_Marinifilaceae;g\_Butyricimonas  
30.6 d\_Bacteria;p\_Bacteroidota;c\_Bacteroidia;o\_Bacteroidales;f\_Bacteroidaceae;g\_Bacteroides  
14.1 d\_Bacteria;p\_Bacteroidota;c\_Bacteroidia;o\_Bacteroidales;f\_Marinifilaceae;g\_Butyricimonas  
10.77 d\_Bacteria;p\_Firmicutes;c\_Clostridia;o\_Oscillospirales;f\_Ruminococcaceae;g\_Faecalibacterium  
18.68 d\_Bacteria;p\_Verrucomicrobiota;c\_Verrucomicrobiae;o\_Verrucomicrobiales;f\_Akkermansiaceae;g\_Akkermansia  
36.55 d\_Bacteria;p\_Firmicutes;c\_Clostridia;o\_Oscillospirales;f\_Ruminococcaceae;g\_Faecalibacterium  
65.38 d\_Bacteria;p\_Firmicutes;c\_Clostridia;o\_Oscillospirales;f\_Oscillospiraceae;g\_Intestinimonas  
40.56 d\_Bacteria;p\_Proteobacteria;c\_Gammaproteobacteria;o\_Burkholderiales;f\_Burkholderiaceae;g\_Parasutterella  
10.3 d\_Bacteria;p\_Firmicutes;c\_Clostridia;o\_Christensenellales;f\_CAG-74;g\_UBA11524  
10.3 d\_Bacteria;p\_Firmicutes;c\_Clostridia;o\_Christensenellales;f\_CAG-74;g\_UBA11524  
95.22 d\_Bacteria;p\_Firmicutes;c\_Clostridia;o\_Lachnospirales;f\_Lachnospiraceae;g\_Bariaticus  
78.56 d\_Bacteria;p\_Firmicutes;c\_Clostridia;o\_Lachnospirales;f\_Lachnospiraceae;g\_Lachnospira  
99.93 d\_Bacteria;p\_Bacteroidota;c\_Bacteroidia;o\_Bacteroidales;f\_Bacteroidaceae;g\_Bacteroides  
99.93 d\_Bacteria;p\_Bacteroidota;c\_Bacteroidia;o\_Bacteroidales;f\_Bacteroidaceae;g\_Phocaeicola  
72.39 d\_Bacteria;p\_Firmicutes;c\_Clostridia;o\_Oscillospirales;f\_Oscillospiraceae;g\_CAG-83  
46.73 d\_Bacteria;p\_Bacteroidota;c\_Bacteroidia;o\_Bacteroidales;f\_Bacteroidaceae;g\_Prevotella  
75.96 d\_Bacteria;p\_Bacteroidota;c\_Bacteroidia;o\_Bacteroidales;f\_Tannerellaceae;g\_Parabacteroides  
6.46 d\_Bacteria;p\_Firmicutes;c\_Clostridia;o\_Oscillospirales;f\_Oscillospiraceae;g\_Flavonifractor  
d\_Bacteria;p\_Firmicutes;c\_Clostridia;o\_Oscillospirales;f\_Oscillospiraceae;g\_ER4  
98.31 d\_Bacteria;p\_Proteobacteria;c\_Gammaproteobacteria;o\_Enterobacteriales;f\_Enterobacteriaceae;g\_Escherichia  
12.14 d\_Bacteria;p\_Firmicutes;c\_Clostridia;o\_Oscillospirales;f\_Acutalibacteraceae;g\_Ruminococcus\_E  
17.62 d\_Bacteria;p\_Firmicutes;c\_Clostridia;o\_Oscillospirales;f\_Ruminococcaceae;g\_Faecalibacterium  
17.62 d\_Bacteria;p\_Firmicutes;c\_Negativicutes;o\_Acidaminococcales;f\_Acidaminococcaceae;g\_Phascoractobacterium  
91.56 d\_Bacteria;p\_Bacteroidota;c\_Bacteroidia;o\_Bacteroidales;f\_Rikenellaceae;g\_Alistipes  
91.56 d\_Bacteria;p\_Bacteroidota;c\_Bacteroidia;o\_Bacteroidales;f\_Rikenellaceae;g\_Alistipes\_A  
91.56 d\_Bacteria;p\_Bacteroidota;c\_Bacteroidia;o\_Bacteroidales;f\_Bacteroidaceae;g\_UBA6398  
88.17 d\_Bacteria;p\_Bacteroidota;c\_Bacteroidia;o\_Bacteroidales;f\_Bacteroidaceae;g\_Bacteroides  
6.84 d\_Bacteria;p\_Verrucomicrobiota;c\_Verrucomicrobiae;o\_Verrucomicrobiales;f\_Akkermansiaceae;g\_Akkermansia  
97.58 d\_Bacteria;p\_Bacteroidota;c\_Bacteroidia;o\_Bacteroidales;f\_Tannerellaceae;g\_Marseille-P3160  
40.01 d\_Bacteria;p\_Actinobacteriota;c\_Actinomycetia;o\_Actinomycetales;f\_Bifidobacteriaceae;g\_Bifidobacterium  
11.04 d\_Bacteria;p\_Firmicutes;c\_Clostridia;o\_Lachnospirales;f\_Lachnospiraceae;g\_Blautia\_A  
16.24 d\_Bacteria;p\_Firmicutes;c\_Clostridia;o\_Oscillospirales;f\_Oscillospiraceae;g\_CAG-83  
57.95 d\_Bacteria;p\_Firmicutes;c\_Clostridia;o\_Oscillospirales;f\_Oscillospiraceae;g\_  
57.95 d\_Bacteria;p\_Firmicutes;c\_Clostridia;o\_Oscillospirales;f\_Oscillospiraceae;g\_HGM12998  
57.95 d\_Bacteria;p\_Firmicutes;c\_Clostridia;o\_Oscillospirales;f\_Oscillospiraceae;g\_Flavonifractor  
61.18 d\_Bacteria;p\_Actinobacteriota;c\_Actinomycetia;o\_Actinomycetales;f\_Bifidobacteriaceae;g\_Bifidobacterium  
92 d\_Bacteria;p\_Bacteroidota;c\_Bacteroidia;o\_Bacteroidales;f\_Tannerellaceae;g\_Parabacteroides  
9.7 d\_Bacteria;p\_Firmicutes;c\_Bacilli;o\_RF39;f\_UBA660;g\_CAG-460  
54.46 d\_Bacteria;p\_Firmicutes;c\_Bacilli;o\_ML615J-28;f\_CAG-313;g\_CAG-313  
99.57 d\_Bacteria;p\_Firmicutes;c\_Clostridia;o\_Oscillospirales;f\_Oscillospiraceae;g\_CAG-83  
99.57 d\_Bacteria;p\_Firmicutes;c\_Clostridia;o\_Oscillospirales;f\_Oscillospiraceae;g\_Dysosmobacter  
22.02 d\_Bacteria;p\_Proteobacteria;c\_Alphaproteobacteria;o\_RF32;f\_CAG-239;g\_51-20  
22.02 d\_Bacteria;p\_Proteobacteria;c\_Alphaproteobacteria;o\_RF32;f\_CAG-239;g\_CAG-267  
38.42 d\_Bacteria;p\_Bacteroidota;c\_Bacteroidia;o\_Bacteroidales;f\_Bacteroidaceae;g\_Prevotella  
14.26 d\_Bacteria;p\_Firmicutes;c\_Bacilli;o\_RF39;f\_UBA660;g\_CAG-460  
97.87 d\_Bacteria;p\_Bacteroidota;c\_Bacteroidia;o\_Bacteroidales;f\_Rikenellaceae;g\_Alistipes  
97.87 d\_Bacteria;p\_Bacteroidota;c\_Bacteroidia;o\_Bacteroidales;f\_Rikenellaceae;g\_Alistipes\_A  
d\_Bacteria;p\_Bacteroidota;c\_Bacteroidia;o\_Bacteroidales;f\_Barnesiellaceae;g\_Barnesiella  
7.33 d\_Bacteria;p\_Proteobacteria;c\_Alphaproteobacteria;o\_RF32;f\_CAG-239;g\_CAG-267  
21.19 d\_Bacteria;p\_Firmicutes;c\_Bacilli;o\_Lactobacillales;f\_Lactobacillaceae;g\_Lactobacillus  
21.19 d\_Bacteria;p\_Firmicutes;c\_Bacilli;o\_Lactobacillales;f\_Lactobacillaceae;g\_Lacticaeibacillus  
21.19 d\_Bacteria;p\_Firmicutes;c\_Bacilli;o\_Lactobacillales;f\_Lactobacillaceae;g\_Ligilactobacillus  
21.19 d\_Bacteria;p\_Firmicutes;c\_Bacilli;o\_Lactobacillales;f\_Lactobacillaceae;g\_Limosilactobacillus  
12.74 d\_Bacteria;p\_Firmicutes;c\_Clostridia;o\_Oscillospirales;f\_Oscillospiraceae;g\_Intestinimonas  
85.01 d\_Bacteria;p\_Firmicutes;c\_Clostridia;o\_Oscillospirales;f\_Oscillospiraceae;g\_Flavonifractor  
85.01 d\_Bacteria;p\_Firmicutes;c\_Clostridia;o\_Oscillospirales;f\_Oscillospiraceae;g\_Intestinimonas  
30.35 d\_Bacteria;p\_Firmicutes;c\_Clostridia;o\_Oscillospirales;f\_Ruminococcaceae;g\_Gemmiger  
99.65 d\_Bacteria;p\_Firmicutes;c\_Clostridia;o\_Lachnospirales;f\_Lachnospiraceae;g\_Lachnospira  
99.65 d\_Bacteria;p\_Firmicutes;c\_Clostridia;o\_Lachnospirales;f\_Lachnospiraceae;g\_Eubacterium\_G  
63.17 d\_Bacteria;p\_Actinobacteriota;c\_Actinomycetia;o\_Actinomycetales;f\_Actinomycetaceae;g\_Pauljensenia  
63.17 d\_Bacteria;p\_Actinobacteriota;c\_Actinomycetia;o\_Actinomycetales;f\_Actinomycetaceae;g\_Actinomycetes  
S14\_vf\_117157  
S14\_vf\_117157  
23.32 d\_Bacteria;p\_Bacteroidota;c\_Bacteroidia;o\_Bacteroidales;f\_Bacteroidaceae;g\_Bacteroides

90.80 blast;93.20  
93 blast;95.00 iPhoP-RF;87.00  
92.3 blast;94.50  
99.1 iPhoP-RF;97.10 blast;93.60 RaFAH;87.80 CRISPR;58.50  
94.5 iPhoP-RF;96.10 blast;70.90  
99.1 iPhoP-RF;96.70 blast;96.60 RaFAH;89.00  
99.6 RaFAH;99.60  
95.6 blast;96.90 iPhoP-RF;96.70  
99.3 CRISPR;98.90 iPhoP-RF;95.70 blast;94.10 RaFAH;74.50  
94.7 blast;96.30 iPhoP-RF;68.60  
94.9 blast;96.40 iPhoP-RF;53.80  
92.7 blast;94.80 iPhoP-RF;56.00  
92.7 blast;94.80 iPhoP-RF;65.30  
93.8 blast;95.60 iPhoP-RF;67.30  
92.1 RaFAH;94.30  
94.3 blast;96.00 iPhoP-RF;58.40  
97.3 CRISPR;98.10 iPhoP-RF;93.40 blast;92.10  
100 CRISPR;98.80 RaFAH;98.60 blast;96.90 iPhoP-RF;82.50  
97.5 blast;96.60 iPhoP-RF;92.40 RaFAH;73.80 CRISPR;53.50  
93 blast;95.00 iPhoP-RF;58.70  
97 CRISPR;97.90 blast;96.90 iPhoP-RF;93.10  
95.6 blast;96.90 iPhoP-RF;91.80  
95.6 blast;96.90 CRISPR;96.60 iPhoP-RF;91.80  
90.3 iPhoP-RF;89.50 blast;81.30 RaFAH;65.60  
99.6 CRISPR;98.80 blast;98.80 iPhoP-RF;94.40 RaFAH;84.60  
100 RaFAH;98.90 iPhoP-RF;96.70 blast;91.60  
92.1 blast;94.30 iPhoP-RF;94.10  
90.1 blast;92.60 iPhoP-RF;68.90  
91.8 RaFAH;94.10  
98.1 blast;98.60 iPhoP-RF;83.30  
91.5 blast;93.80 iPhoP-RF;78.50  
93.5 CRISPR;95.40  
95.7 RaFAH;97.00  
90.1 blast;92.60  
98.7 RaFAH;93.20 blast;89.90 iPhoP-RF;62.20  
93.1 blast;95.10 iPhoP-RF;68.20  
98.1 RaFAH;98.60  
98.1 RaFAH;98.60  
91.6 blast;93.90 iPhoP-RF;74.30  
99.4 iPhoP-RF;97.10 blast;96.60 RaFAH;91.90  
100 CRISPR;99.60 RaFAH;96.00 blast;93.60 iPhoP-RF;72.60  
98.4 CRISPR;98.80 iPhoP-RF;72.60  
91.5 blast;93.80 iPhoP-RF;88.20 CRISPR;56.60  
95.9 CRISPR;89.80 RaFAH;85.80 iPhoP-RF;84.50  
98.5 CRISPR;98.90 blast;95.20 iPhoP-RF;87.90  
92.3 blast;94.50 iPhoP-RF;80.60  
91 blast;93.40 iPhoP-RF;71.30  
90 blast;92.50 iPhoP-RF;67.70  
99.7 CRISPR;99.70 iPhoP-RF;92.40 blast;92.00  
99.9 CRISPR;99.20 iPhoP-RF;95.10 blast;93.30 RaFAH;90.50  
94 blast;95.80 iPhoP-RF;53.30  
95.6 blast;96.90 iPhoP-RF;81.60  
99.7 RaFAH;99.00 blast;82.80  
98.7 RaFAH;99.00  
97.9 CRISPR;98.50 blast;79.90 iPhoP-RF;74.60  
95 blast;96.50 iPhoP-RF;72.20  
90.6 RaFAH;93.00  
94.7 blast;96.30 iPhoP-RF;53.80  
99.9 blast;96.80 RaFAH;96.50 iPhoP-RF;82.80 CRISPR;82.60  
95 RaFAH;96.50  
90.3 blast;92.80 iPhoP-RF;81.90  
91.6 blast;93.90 iPhoP-RF;83.30  
100 RaFAH;98.90 CRISPR;96.80 iPhoP-RF;96.10 blast;95.50  
98.5 RaFAH;98.90  
98.5 RaFAH;98.90  
98.5 RaFAH;98.90  
90.8 blast;93.20 iPhoP-RF;79.50  
91.2 blast;93.60 iPhoP-RF;89.80 CRISPR;61.00  
91.2 blast;93.60  
95.3 blast;96.70 CRISPR;94.60 iPhoP-RF;86.30  
99.9 CRISPR;98.90 RaFAH;91.00 blast;87.20 iPhoP-RF;83.10  
91.8 RaFAH;91.00 blast;67.20  
98.4 RaFAH;94.80 CRISPR;83.10 iPhoP-RF;64.80  
92.7 RaFAH;94.80  
100 RaFAH;99.40 CRISPR;98.80 iPhoP-RF;94.40 blast;93.60  
94 RaFAH;90.00 iPhoP-RF;70.90 CRISPR;63.50

S14\_vf\_37500  
S14\_vf\_51134  
S14\_vf\_56130  
S14\_vf\_56130  
S14\_vf\_56130  
S14\_vf\_57689  
S14\_vf\_57689  
S14\_vf\_58919  
S14\_vf\_58919  
S14\_vf\_58919  
S14\_vf\_72335  
S14\_vf\_72953  
S14\_vf\_72953  
S14\_vf\_72953  
S14\_vf\_72953  
S14\_vf\_72953  
S14\_vf\_78139  
S14\_vf\_78139  
S14\_vf\_78139  
S14\_vf\_78139  
S14\_vf\_85122  
S14\_vf\_92240  
S14\_vf\_93134  
S14\_vf\_99344  
S14\_vf\_100227  
S14\_vf\_100227  
S14\_vf\_101482  
S14\_vf\_102698  
S14\_vf\_112068  
S14\_vf\_112345  
S14\_vf\_112345  
S14\_vf\_11510  
S14\_vf\_115377  
S14\_vf\_115377  
S14\_vf\_115455  
S14\_vf\_117153  
S14\_vf\_117153  
S14\_vf\_117166  
S14\_vf\_14737  
S14\_vf\_15228  
S14\_vf\_25852  
S14\_vf\_25852  
S14\_vf\_26320  
S14\_vf\_2870  
S14\_vf\_30108  
S14\_vf\_32499  
S14\_vf\_3251  
S14\_vf\_38905  
S14\_vf\_39266  
S14\_vf\_39797  
S14\_vf\_56251  
S14\_vf\_56410  
S14\_vf\_59347  
S14\_vf\_59347  
S14\_vf\_61530  
S14\_vf\_632  
S14\_vf\_632  
S14\_vf\_632  
S14\_vf\_66139  
S14\_vf\_66208  
S14\_vf\_66841  
S14\_vf\_67094  
S14\_vf\_70985  
S14\_vf\_73301  
S14\_vf\_74067  
S14\_vf\_78164  
S14\_vf\_88666  
S14\_vf\_88666  
S14\_vf\_90934  
S14\_vf\_96286  
S14\_vf\_96286  
S14\_vf\_96286  
S14\_vf\_9676  
S14\_vf\_97835  
S15\_vf\_2032  
S15\_vf\_2032

5.58 d\_Bacteria.p\_\_Bacteroidota;c\_\_Bacteroidia;o\_\_Bacteroidales;f\_\_Bacteroidaceae;g\_\_Phocaeicola  
47.7 d\_Bacteria.p\_\_Firmicutes;c\_\_Clostridia;o\_\_Oscillospirales;f\_\_Ruminococcaceae;g\_\_Ruminococcus\_D  
100 d\_Bacteria.p\_\_Firmicutes;c\_\_Clostridia;o\_\_Clostridiales;f\_\_Clostridiaceae;g\_\_Clostridium  
100 d\_Bacteria.p\_\_Firmicutes;c\_\_Clostridia;o\_\_Clostridiales;f\_\_Clostridiaceae;g\_\_Clostridium\_F  
100 d\_Bacteria.p\_\_Firmicutes;c\_\_Clostridia;o\_\_Clostridiales;f\_\_Clostridiaceae;g\_\_Clostridium\_P  
94.04 d\_Bacteria.p\_\_Actinobacteriota;c\_\_Actinomycetia;o\_\_Actinomycetales;f\_\_Actinomycetaceae;g\_\_Actinomycetes  
94.04 d\_Bacteria.p\_\_Actinobacteriota;c\_\_Actinomycetia;o\_\_Actinomycetales;f\_\_Actinomycetaceae;g\_\_Pauljensenia  
74.74 d\_Bacteria.p\_\_Firmicutes;c\_\_Clostridia;o\_\_Lachnospirales;f\_\_Lachnospiraceae;g\_\_Roseburia  
74.74 d\_Bacteria.p\_\_Firmicutes;c\_\_Clostridia;o\_\_Lachnospirales;f\_\_Lachnospiraceae;g\_\_Agathobacter  
74.74 d\_Bacteria.p\_\_Firmicutes;c\_\_Clostridia;o\_\_Lachnospirales;f\_\_Lachnospiraceae;g\_\_COE1  
11.73 d\_Bacteria.p\_\_Firmicutes;c\_\_Bacilli;o\_\_Erysipelotrichales;f\_\_Erysipelotrichaceae;g\_\_Holdemania  
32.12 d\_Bacteria.p\_\_Firmicutes;c\_\_Bacilli;o\_\_Lactobacillales;f\_\_Lactobacillaceae;g\_\_Lacticaeibacillus  
32.12 d\_Bacteria.p\_\_Firmicutes;c\_\_Bacilli;o\_\_Lactobacillales;f\_\_Lactobacillaceae;g\_\_Lactobacillus  
32.12 d\_Bacteria.p\_\_Firmicutes;c\_\_Bacilli;o\_\_Lactobacillales;f\_\_Lactobacillaceae;g\_\_Ligilactobacillus  
32.12 d\_Bacteria.p\_\_Firmicutes;c\_\_Bacilli;o\_\_Lactobacillales;f\_\_Lactobacillaceae;g\_\_Limosilactobacillus  
32.12 d\_Bacteria.p\_\_Firmicutes;c\_\_Bacilli;o\_\_Lactobacillales;f\_\_Lactobacillaceae;g\_\_Pediococcus  
74.71 d\_Bacteria.p\_\_Firmicutes;c\_\_Bacilli;o\_\_Lactobacillales;f\_\_Lactobacillaceae;g\_\_Lactobacillus  
74.71 d\_Bacteria.p\_\_Firmicutes;c\_\_Bacilli;o\_\_Lactobacillales;f\_\_Lactobacillaceae;g\_\_Lacticaeibacillus  
74.71 d\_Bacteria.p\_\_Firmicutes;c\_\_Bacilli;o\_\_Lactobacillales;f\_\_Lactobacillaceae;g\_\_Ligilactobacillus  
74.71 d\_Bacteria.p\_\_Firmicutes;c\_\_Bacilli;o\_\_Lactobacillales;f\_\_Lactobacillaceae;g\_\_Limosilactobacillus  
16.16 d\_Bacteria.p\_\_Firmicutes;c\_\_Clostridia;o\_\_Clostridiales;f\_\_Clostridiaceae;g\_\_Clostridium  
99.79 d\_Bacteria.p\_\_Firmicutes;c\_\_Clostridia;o\_\_Lachnospirales;f\_\_Lachnospiraceae;g\_\_Coproccoccus  
12.04 d\_Bacteria.p\_\_Firmicutes;c\_\_Clostridia;o\_\_Lachnospirales;f\_\_Lachnospiraceae;g\_\_Muricomes  
10.5 d\_Bacteria.p\_\_Firmicutes;c\_\_Clostridia;o\_\_Lachnospirales;f\_\_Lachnospiraceae;g\_\_Eubacterium\_F  
81.21 d\_Bacteria.p\_\_Firmicutes;c\_\_Clostridia;o\_\_Lachnospirales;f\_\_Lachnospiraceae;g\_\_Enterocloster  
81.21 d\_Bacteria.p\_\_Firmicutes;c\_\_Clostridia;o\_\_Lachnospirales;f\_\_Lachnospiraceae;g\_\_Hungatella\_A  
6.74 d\_Bacteria.p\_\_Firmicutes;c\_\_Clostridia;o\_\_Oscillospirales;f\_\_Ruminococcaceae;g\_\_QAMM01  
99.62 d\_Bacteria.p\_\_Firmicutes;c\_\_Clostridia;o\_\_Acetivibrionales;f\_\_Acetivibrionaceae;g\_\_Ruminiclostridium  
27.86 d\_Bacteria.p\_\_Firmicutes;c\_\_Clostridia;o\_\_Oscillospirales;f\_\_Butyrivibrionaceae;g\_\_Agathobaculum  
71.03 d\_Bacteria.p\_\_Bacteroidota;c\_\_Bacteroidia;o\_\_Bacteroidales;f\_\_Bacteroidaceae;g\_\_Bacteroides  
71.03 d\_Bacteria.p\_\_Bacteroidota;c\_\_Bacteroidia;o\_\_Bacteroidales;f\_\_Bacteroidaceae;g\_\_Phocaeicola  
39.46 d\_Bacteria.p\_\_Bacteroidota;c\_\_Bacteroidia;o\_\_Bacteroidales;f\_\_Bacteroidaceae;g\_\_Bacteroides  
76.83 d\_Bacteria.p\_\_Firmicutes;c\_\_Clostridia;o\_\_Lachnospirales;f\_\_Lachnospiraceae;g\_\_Blautia  
76.83 d\_Bacteria.p\_\_Firmicutes;c\_\_Clostridia;o\_\_Lachnospirales;f\_\_Lachnospiraceae;g\_\_Hespellia  
25.58 d\_Bacteria.p\_\_Firmicutes;c\_\_Clostridia;o\_\_Eubacteriales;f\_\_Eubacteriaceae;g\_\_Eubacterium  
96.78 d\_Bacteria.p\_\_Firmicutes;c\_\_Clostridia;o\_\_Lachnospirales;f\_\_Lachnospiraceae;g\_\_Dorea\_A  
96.78 d\_Bacteria.p\_\_Firmicutes;c\_\_Clostridia;o\_\_Lachnospirales;f\_\_Lachnospiraceae;g\_\_Dorea  
22.09 d\_Bacteria.p\_\_Firmicutes;c\_\_Clostridia;o\_\_Oscillospirales;f\_\_Oscillospiraceae;g\_\_Eveptia  
33.52 d\_Bacteria.p\_\_Firmicutes;c\_\_Clostridia;o\_\_Oscillospirales;f\_\_Ruminococcaceae;g\_\_Ruthenibacterium  
86.47 d\_Bacteria.p\_\_Bacteroidota;c\_\_Bacteroidia;o\_\_Bacteroidales;f\_\_Tannerellaceae;g\_\_Parabacteroides  
26.78 d\_Bacteria.p\_\_Bacteroidota;c\_\_Bacteroidia;o\_\_Bacteroidales;f\_\_Bacteroidaceae;g\_\_Bacteroides  
26.78 d\_Bacteria.p\_\_Bacteroidota;c\_\_Bacteroidia;o\_\_Bacteroidales;f\_\_Bacteroidaceae;g\_\_Phocaeicola  
65.93 d\_Bacteria.p\_\_Firmicutes;c\_\_Clostridia;o\_\_Lachnospirales;f\_\_Lachnospiraceae;g\_\_Ruminococcus\_B  
56.13 d\_Bacteria.p\_\_Proteobacteria;c\_\_Gammaproteobacteria;o\_\_Burkholderiales;f\_\_Burkholderiaceae;g\_\_Sutterella  
19.83 d\_Bacteria.p\_\_Firmicutes;c\_\_Clostridia;o\_\_Lachnospirales;f\_\_Lachnospiraceae;g\_\_Enterocloster  
51.73 d\_Bacteria.p\_\_Bacteroidota;c\_\_Bacteroidia;o\_\_Bacteroidales;f\_\_Bacteroidaceae;g\_\_Bacteroides  
82.87 d\_Bacteria.p\_\_Firmicutes;c\_\_Clostridia;o\_\_Oscillospirales;f\_\_Oscillospiraceae;g\_\_Flavonifractor  
9.01 d\_Bacteria.p\_\_Firmicutes;c\_\_Clostridia;o\_\_Oscillospirales;f\_\_Ruminococcaceae;g\_\_Ruthenibacterium  
15.51 d\_Bacteria.p\_\_Firmicutes;c\_\_Clostridia;o\_\_Oscillospirales;f\_\_Acutalibacteraceae;g\_\_Ruminococcus\_E  
47.42 d\_Bacteria.p\_\_Firmicutes;c\_\_Clostridia;o\_\_Lachnospirales;f\_\_Lachnospiraceae;g\_\_Anaerostipes  
20.56 d\_Bacteria.p\_\_Firmicutes;c\_\_Clostridia;o\_\_Lachnospirales;f\_\_Lachnospiraceae;g\_\_Muricomes  
80.58 d\_Bacteria.p\_\_Firmicutes;c\_\_Clostridia;o\_\_Oscillospirales;f\_\_Oscillospiraceae;g\_\_Flavonifractor  
29.43 d\_Bacteria.p\_\_Firmicutes;c\_\_Clostridia;o\_\_Lachnospirales;f\_\_Lachnospiraceae;g\_\_Muricomes  
29.43 d\_Bacteria.p\_\_Firmicutes;c\_\_Clostridia;o\_\_Lachnospirales;f\_\_Lachnospiraceae;g\_\_Ruminococcus\_B  
22.32 d\_Bacteria.p\_\_Firmicutes;c\_\_Clostridia;o\_\_Oscillospirales;f\_\_Acutalibacteraceae;g\_\_UBA1417  
78.66 d\_Bacteria.p\_\_Firmicutes;c\_\_Clostridia;o\_\_Clostridiales;f\_\_Clostridiaceae;g\_\_Clostridium  
78.66 d\_Bacteria.p\_\_Firmicutes;c\_\_Clostridia;o\_\_Clostridiales;f\_\_Clostridiaceae;g\_\_Clostridium\_F  
78.66 d\_Bacteria.p\_\_Firmicutes;c\_\_Clostridia;o\_\_Clostridiales;f\_\_Clostridiaceae;g\_\_Clostridium\_P  
83.75 d\_Bacteria.p\_\_Firmicutes;c\_\_Clostridia;o\_\_Oscillospirales;f\_\_Acutalibacteraceae;g\_\_Ruminococcus\_E  
100 d\_Bacteria.p\_\_Bacteroidota;c\_\_Bacteroidia;o\_\_Bacteroidales;f\_\_Bacteroidaceae;g\_\_Bacteroides  
15.26 d\_Bacteria.p\_\_Firmicutes;c\_\_Clostridia;o\_\_Lachnospirales;f\_\_Lachnospiraceae;g\_\_Agathobacter  
10 d\_Bacteria.p\_\_Firmicutes;c\_\_Clostridia;o\_\_Oscillospirales;f\_\_Oscillospiraceae;g\_\_Lawsonibacter  
21.93 d\_Bacteria.p\_\_Bacteroidota;c\_\_Bacteroidia;o\_\_Bacteroidales;f\_\_Bacteroidaceae;g\_\_Bacteroides  
15.25 d\_Bacteria.p\_\_Firmicutes;c\_\_Clostridia;o\_\_Oscillospirales;f\_\_Ruminococcaceae;g\_\_Massilimalliae  
100 d\_Bacteria.p\_\_Bacteroidota;c\_\_Bacteroidia;o\_\_Bacteroidales;f\_\_Bacteroidaceae;g\_\_Bacteroides  
61.84 d\_Bacteria.p\_\_Bacteroidota;c\_\_Bacteroidia;o\_\_Bacteroidales;f\_\_Marinifilaceae;g\_\_Odoribacter  
32.05 d\_Bacteria.p\_\_Firmicutes;c\_\_Clostridia;o\_\_Oscillospirales;f\_\_Acutalibacteraceae;g\_\_Fimivivinus  
32.05 d\_Bacteria.p\_\_Firmicutes;c\_\_Clostridia;o\_\_Oscillospirales;f\_\_Acutalibacteraceae;g\_\_UBA1691  
62.33 d\_Bacteria.p\_\_Firmicutes;c\_\_Clostridia;o\_\_Oscillospirales;f\_\_Ruminococcaceae;g\_\_Faecalibacterium  
99.54 d\_Bacteria.p\_\_Firmicutes;c\_\_Clostridia;o\_\_Lachnospirales;f\_\_Lachnospiraceae;g\_\_Blautia  
99.54 d\_Bacteria.p\_\_Firmicutes;c\_\_Clostridia;o\_\_Lachnospirales;f\_\_Lachnospiraceae;g\_\_Blautia\_A  
99.54 d\_Bacteria.p\_\_Firmicutes;c\_\_Clostridia;o\_\_Lachnospirales;f\_\_Lachnospiraceae;g\_\_Mediterraneibacter  
24.59 d\_Bacteria.p\_\_Firmicutes;c\_\_Clostridia;o\_\_Oscillospirales;f\_\_Oscillospiraceae;g\_\_Lawsonibacter  
d\_Bacteria.p\_\_Firmicutes;c\_\_Clostridia;o\_\_Oscillospirales;f\_\_Oscillospiraceae;g\_\_CAG-83  
83.93 d\_Bacteria.p\_\_Bacteroidota;c\_\_Bacteroidia;o\_\_Bacteroidales;f\_\_Bacteroidaceae;g\_\_Bacteroides  
83.93 d\_Bacteria.p\_\_Bacteroidota;c\_\_Bacteroidia;o\_\_Bacteroidales;f\_\_Bacteroidaceae;g\_\_Phocaeicola

94.3 CRISPR;96.00 iPhoP-RF;67.00  
97.2 blast;97.90 iPhoP-RF;92.80 RaFAH;52.60  
98.8 RaFAH;99.10  
98.8 RaFAH;99.10  
98.8 RaFAH;99.10  
99 blast;94.00 RaFAH;93.30 CRISPR;80.00 iPhoP-RF;75.40  
90.9 RaFAH;93.30  
95.3 blast;90.40 iPhoP-RF;87.90 RaFAH;82.70  
95.2 blast;90.20 RaFAH;82.70 iPhoP-RF;78.30  
90.4 blast;92.90 iPhoP-RF;81.40  
92.1 CRISPR;94.30  
96.7 RaFAH;97.70  
96.7 RaFAH;97.70  
96.7 RaFAH;97.70  
96.7 RaFAH;97.70  
91.8 blast;94.10 iPhoP-RF;93.40 CRISPR;56.30  
100 RaFAH;99.10 blast;96.80 CRISPR;96.50 iPhoP-RF;92.80  
98.8 RaFAH;99.10  
98.8 RaFAH;99.10  
98.8 RaFAH;99.10  
95 blast;92.30 iPhoP-RF;86.00 RaFAH;77.50  
93.2 CRISPR;95.20  
96.7 CRISPR;97.70  
96.9 CRISPR;97.80  
94.2 CRISPR;95.90 blast;94.00 iPhoP-RF;86.30  
91 iPhoP-RF;93.40  
92 blast;94.20 iPhoP-RF;69.10  
90.1 RaFAH;92.60  
97.5 blast;98.20 iPhoP-RF;66.00  
99.1 iPhoP-RF;96.70 RaFAH;88.90 blast;75.90  
95.6 blast;96.90 iPhoP-RF;95.70  
96.9 blast;91.70 RaFAH;87.00 iPhoP-RF;81.40  
98.8 CRISPR;97.10 RaFAH;83.90 iPhoP-RF;60.90  
94 blast;95.80 iPhoP-RF;66.80  
93 blast;95.00 CRISPR;89.70 iPhoP-RF;84.50  
94.2 blast;95.90 iPhoP-RF;94.70 CRISPR;58.40  
90.6 blast;93.00 iPhoP-RF;68.60  
94.2 blast;95.90 iPhoP-RF;66.30  
93.1 blast;95.10 iPhoP-RF;68.40  
100 CRISPR;99.00 blast;98.60 RaFAH;97.90 iPhoP-RF;96.10  
97.8 blast;96.60 iPhoP-RF;95.10 CRISPR;93.00 RaFAH;77.10  
90.1 blast;92.60 CRISPR;86.70  
95.2 blast;96.60 iPhoP-RF;82.20  
99 blast;96.90 RaFAH;87.10 CRISPR;78.30 iPhoP-RF;69.50  
92.3 blast;94.50 CRISPR;82.40 iPhoP-RF;78.30  
99.1 blast;98.10 iPhoP-RF;96.70 RaFAH;82.60  
95.6 blast;96.90 iPhoP-RF;65.60  
93.8 blast;95.60 iPhoP-RF;81.60 CRISPR;54.30  
98.7 CRISPR;99.00 blast;96.80 iPhoP-RF;93.70  
93.8 blast;95.60 iPhoP-RF;67.00  
95.3 iPhoP-RF;96.70 blast;93.30 CRISPR;68.70  
95.2 blast;96.60 iPhoP-RF;95.40 CRISPR;94.00  
93.1 iPhoP-RF;95.10  
90.7 iPhoP-RF;93.10  
92 blast;94.20 iPhoP-RF;82.80  
91 RaFAH;93.40  
91 RaFAH;93.40  
91 RaFAH;93.40  
95.6 blast;96.90 iPhoP-RF;85.70  
100 RaFAH;98.30 iPhoP-RF;96.40 blast;93.70  
90.4 blast;92.90 iPhoP-RF;78.00  
90.7 blast;93.10  
99 iPhoP-RF;96.70 blast;92.60 RaFAH;88.40  
94.2 blast;95.90 iPhoP-RF;64.80  
99.6 RaFAH;93.20 blast;92.00 iPhoP-RF;82.20  
95.4 blast;96.80 iPhoP-RF;84.80 CRISPR;56.80  
95.4 blast;96.80 iPhoP-RF;86.70  
95.4 blast;96.80 CRISPR;90.80 iPhoP-RF;86.70  
99.1 blast;96.70 RaFAH;89.00 iPhoP-RF;81.10  
96.3 RaFAH;97.40  
96.3 RaFAH;97.40  
95.6 blast;96.90 iPhoP-RF;55.70  
90.7 blast;93.10 iPhoP-RF;77.50  
90.6 blast;93.00 iPhoP-RF;84.20  
99.3 iPhoP-RF;97.10 blast;96.20 CRISPR;91.10 RaFAH;89.30  
95.9 iPhoP-RF;97.10 blast;89.90 CRISPR;76.20

S15\_vf\_20644  
S15\_vf\_20644  
S15\_vf\_2513  
S15\_vf\_75924  
S15\_vs\_18274  
S15\_vs\_27510  
S15\_vs\_27510  
S15\_vs\_35445  
S15\_vs\_3868  
S15\_vs\_3868  
S15\_vs\_42043  
S15\_vs\_42043  
S15\_vs\_43913  
S15\_vs\_71968  
S15\_vs\_71968  
S16\_vf\_100473  
S16\_vf\_1037  
S16\_vf\_108554  
S16\_vf\_16182  
S16\_vf\_16182  
S16\_vf\_169895  
S16\_vf\_172897  
S16\_vf\_173099  
S16\_vf\_173109  
S16\_vf\_36146  
S16\_vf\_36146  
S16\_vf\_36146  
S16\_vf\_5809  
S16\_vf\_6102  
S16\_vf\_84462  
S16\_vf\_87190  
S16\_vf\_90328  
S16\_vf\_9270  
S16\_vf\_9270  
S16\_vf\_96483  
S16\_vf\_97279  
S16\_vs\_101072  
S16\_vs\_103726  
S16\_vs\_107235  
S16\_vs\_116956  
S16\_vs\_118029  
S16\_vs\_120149  
S16\_vs\_120622  
S16\_vs\_127669  
S16\_vs\_127669  
S16\_vs\_127905  
S16\_vs\_127905  
S16\_vs\_132979  
S16\_vs\_136935  
S16\_vs\_136935  
S16\_vs\_140709  
S16\_vs\_140709  
S16\_vs\_140709  
S16\_vs\_140709  
S16\_vs\_141218  
S16\_vs\_142561  
S16\_vs\_142561  
S16\_vs\_15093  
S16\_vs\_165662  
S16\_vs\_173079  
S16\_vs\_173096  
S16\_vs\_173141  
S16\_vs\_17493  
S16\_vs\_18440  
S16\_vs\_19968  
S16\_vs\_20060  
S16\_vs\_32764  
S16\_vs\_33281  
S16\_vs\_33281  
S16\_vs\_34021  
S16\_vs\_38863  
S16\_vs\_4662  
S16\_vs\_48714  
S16\_vs\_51901  
S16\_vs\_75108  
S16\_vs\_76823  
83.74 d\_Bacteria;p\_\_Bacteroidota;c\_\_Bacteroidia;o\_\_Bacteroidales;f\_\_Rikenellaceae;g\_\_Alistipes  
83.74 d\_Bacteria;p\_\_Bacteroidota;c\_\_Bacteroidia;o\_\_Bacteroidales;f\_\_Rikenellaceae;g\_\_Alistipes\_A  
25.17 d\_Bacteria;p\_\_Firmicutes;c\_\_Clostridia;o\_\_Lachnospirales;f\_\_Lachnospiraceae;g\_\_Lachnospira  
99.22 d\_Bacteria;p\_\_Bacteroidota;c\_\_Bacteroidia;o\_\_Bacteroidales;f\_\_Bacteroidaceae;g\_\_Bacteroides  
75.03 d\_Bacteria;p\_\_Bacteroidota;c\_\_Bacteroidia;o\_\_Bacteroidales;f\_\_Coproacteraceae;g\_\_Coproacter  
51.41 d\_Bacteria;p\_\_Bacteroidota;c\_\_Bacteroidia;o\_\_Bacteroidales;f\_\_Bacteroidaceae;g\_\_Bacteroides  
51.41 d\_Bacteria;p\_\_Bacteroidota;c\_\_Bacteroidia;o\_\_Bacteroidales;f\_\_Bacteroidaceae;g\_\_Phocaeicola  
27.45 d\_Bacteria;p\_\_Bacteroidota;c\_\_Bacteroidia;o\_\_Bacteroidales;f\_\_Bacteroidaceae;g\_\_Bacteroides  
100 d\_Bacteria;p\_\_Bacteroidota;c\_\_Bacteroidia;o\_\_Bacteroidales;f\_\_Bacteroidaceae;g\_\_Bacteroides  
100 d\_Bacteria;p\_\_Bacteroidota;c\_\_Bacteroidia;o\_\_Bacteroidales;f\_\_Tannerellaceae;g\_\_Parabacteroides  
51.36 d\_Bacteria;p\_\_Bacteroidota;c\_\_Bacteroidia;o\_\_Bacteroidales;f\_\_Bacteroidaceae;g\_\_Bacteroides  
51.36 d\_Bacteria;p\_\_Bacteroidota;c\_\_Bacteroidia;o\_\_Bacteroidales;f\_\_Bacteroidaceae;g\_\_Phocaeicola  
99.8 d\_Bacteria;p\_\_Bacteroidota;c\_\_Bacteroidia;o\_\_Bacteroidales;f\_\_Bacteroidaceae;g\_\_Bacteroides  
100 d\_Bacteria;p\_\_Bacteroidota;c\_\_Bacteroidia;o\_\_Bacteroidales;f\_\_Rikenellaceae;g\_\_Alistipes  
100 d\_Bacteria;p\_\_Bacteroidota;c\_\_Bacteroidia;o\_\_Bacteroidales;f\_\_Rikenellaceae;g\_\_Alistipes\_A  
8.42 d\_Bacteria;p\_\_Actinobacteriota;c\_\_Actinomycetia;o\_\_Actinomycetales;f\_\_Bifidobacteriaceae;g\_\_Bifidobacterium  
73.36 d\_Bacteria;p\_\_Firmicutes;c\_\_Clostridia;o\_\_Lachnospirales;f\_\_Lachnospiraceae;g\_\_Lachnospira  
18.88 d\_Bacteria;p\_\_Firmicutes;c\_\_Clostridia;o\_\_Oscillospirales;f\_\_Ruminococcaceae;g\_\_Faecalibacterium  
64.12 d\_Bacteria;p\_\_Actinobacteriota;c\_\_Actinomycetia;o\_\_Actinomycetales;f\_\_Actinomycetaceae;g\_\_Pauljensenia  
64.12 d\_Bacteria;p\_\_Actinobacteriota;c\_\_Actinomycetia;o\_\_Actinomycetales;f\_\_Actinomycetaceae;g\_\_Actinomycetes  
11.84 d\_Bacteria;p\_\_Firmicutes;c\_\_Clostridia;o\_\_Oscillospirales;f\_\_Ruminococcaceae;g\_\_Ruthenibacterium  
32.49 d\_Bacteria;p\_\_Actinobacteriota;c\_\_Actinomycetia;o\_\_Actinomycetales;f\_\_Bifidobacteriaceae;g\_\_Bifidobacterium  
55.52 d\_Bacteria;p\_\_Firmicutes;c\_\_Clostridia;o\_\_Oscillospirales;f\_\_Oscillospiraceae;g\_\_Flavonifractor  
7.33 d\_Bacteria;p\_\_Actinobacteriota;c\_\_Actinomycetia;o\_\_Actinomycetales;f\_\_Bifidobacteriaceae;g\_\_Bifidobacterium  
99.74 d\_Bacteria;p\_\_Firmicutes;c\_\_Clostridia;o\_\_Clostridiales;f\_\_Clostridiaceae;g\_\_Clostridium  
99.74 d\_Bacteria;p\_\_Firmicutes;c\_\_Clostridia;o\_\_Clostridiales;f\_\_Clostridiaceae;g\_\_Clostridium\_F  
99.74 d\_Bacteria;p\_\_Firmicutes;c\_\_Clostridia;o\_\_Clostridiales;f\_\_Clostridiaceae;g\_\_Clostridium\_P  
87.43 d\_Bacteria;p\_\_Firmicutes;c\_\_Clostridia;o\_\_Lachnospirales;f\_\_Lachnospiraceae;g\_\_Lachnospira  
38.14 d\_Bacteria;p\_\_Firmicutes;c\_\_Clostridia;o\_\_Oscillospirales;f\_\_Oscillospiraceae;g\_\_ER4  
31.67 d\_Bacteria;p\_\_Firmicutes;c\_\_Clostridia;o\_\_Lachnospirales;f\_\_Anaerotignaceae;g\_\_Anaerotignum  
34.33 d\_Bacteria;p\_\_Bacteroidota;c\_\_Bacteroidia;o\_\_Bacteroidales;f\_\_Bacteroidaceae;g\_\_Bacteroides  
16.6 d\_Bacteria;p\_\_Firmicutes;c\_\_Clostridia;o\_\_TAN877;f\_\_CAG-508;g\_\_CAG-269  
8.58 d\_Bacteria;p\_\_Bacteroidota;c\_\_Bacteroidia;o\_\_Bacteroidales;f\_\_Rikenellaceae;g\_\_Alistipes  
8.58 d\_Bacteria;p\_\_Bacteroidota;c\_\_Bacteroidia;o\_\_Bacteroidales;f\_\_Bacteroidaceae;g\_\_Bacteroides  
29.87 d\_Bacteria;p\_\_Firmicutes;c\_\_Clostridia;o\_\_Lachnospirales;f\_\_Lachnospiraceae;g\_\_Blautia\_A  
52.37 d\_Bacteria;p\_\_Firmicutes;c\_\_Clostridia;o\_\_Oscillospirales;f\_\_Oscillospiraceae;g\_\_ER4  
26.56 d\_Bacteria;p\_\_Firmicutes;c\_\_Clostridia;o\_\_Lachnospirales;f\_\_Lachnospiraceae;g\_\_CAG-127  
26.95 d\_Bacteria;p\_\_Firmicutes;c\_\_Clostridia;o\_\_Oscillospirales;f\_\_Ruminococcaceae;g\_\_Ruthenibacterium  
98.85 d\_Bacteria;p\_\_Firmicutes;c\_\_Clostridia;o\_\_Oscillospirales;f\_\_Ruminococcaceae;g\_\_Ruminococcus\_D  
43.56 d\_Bacteria;p\_\_Firmicutes;c\_\_Clostridia;o\_\_Lachnospirales;f\_\_Lachnospiraceae;g\_\_Acetatifactor  
43.23 d\_Bacteria;p\_\_Firmicutes;c\_\_Clostridia;o\_\_Lachnospirales;f\_\_Lachnospiraceae;g\_\_Eubacterium\_G  
12.05 d\_Bacteria;p\_\_Firmicutes;c\_\_Clostridia;o\_\_Oscillospirales;f\_\_Acutalibacteraceae;g\_\_Eubacterium\_R  
63.91 d\_Bacteria;p\_\_Proteobacteria;c\_\_Gammaproteobacteria;o\_\_Burkholderiales;f\_\_Burkholderiaceae;g\_\_Parasutterella  
99.82 d\_Bacteria;p\_\_Bacteroidota;c\_\_Bacteroidia;o\_\_Bacteroidales;f\_\_Bacteroidaceae;g\_\_Bacteroides  
99.82 d\_Bacteria;p\_\_Bacteroidota;c\_\_Bacteroidia;o\_\_Bacteroidales;f\_\_Bacteroidaceae;g\_\_Phocaeicola  
55.65 d\_Bacteria;p\_\_Bacteroidota;c\_\_Bacteroidia;o\_\_Bacteroidales;f\_\_Bacteroidaceae;g\_\_Bacteroides  
55.65 d\_Bacteria;p\_\_Bacteroidota;c\_\_Bacteroidia;o\_\_Bacteroidales;f\_\_Bacteroidaceae;g\_\_Phocaeicola  
31.86 d\_Bacteria;p\_\_Firmicutes;c\_\_Clostridia;o\_\_Oscillospirales;f\_\_Ruminococcaceae;g\_\_Faecalibacterium  
99.58 d\_Bacteria;p\_\_Bacteroidota;c\_\_Bacteroidia;o\_\_Bacteroidales;f\_\_Bacteroidaceae;g\_\_Bacteroides  
99.58 d\_Bacteria;p\_\_Bacteroidota;c\_\_Bacteroidia;o\_\_Bacteroidales;f\_\_Bacteroidaceae;g\_\_Phocaeicola  
84.15 d\_Bacteria;p\_\_Firmicutes;c\_\_Clostridia;o\_\_Lachnospirales;f\_\_Lachnospiraceae;g\_\_CAG-317  
84.15 d\_Bacteria;p\_\_Firmicutes;c\_\_Clostridia;o\_\_Lachnospirales;f\_\_Lachnospiraceae;g\_\_Bariatricus  
84.15 d\_Bacteria;p\_\_Firmicutes;c\_\_Clostridia;o\_\_Lachnospirales;f\_\_Lachnospiraceae;g\_\_Dorea\_B  
84.15 d\_Bacteria;p\_\_Firmicutes;c\_\_Clostridia;o\_\_Lachnospirales;f\_\_Lachnospiraceae;g\_\_Lachnoclostridium\_B  
10.25 d\_Bacteria;p\_\_Firmicutes;c\_\_Bacilli;o\_\_ML615J-28;f\_\_CAG-313;g\_\_CAG-313  
99.95 d\_Bacteria;p\_\_Bacteroidota;c\_\_Bacteroidia;o\_\_Bacteroidales;f\_\_Rikenellaceae;g\_\_Alistipes\_A  
99.95 d\_Bacteria;p\_\_Bacteroidota;c\_\_Bacteroidia;o\_\_Bacteroidales;f\_\_Rikenellaceae;g\_\_Alistipes  
19.11 d\_Bacteria;p\_\_Firmicutes;c\_\_Clostridia;o\_\_Christensenellales;f\_\_CAG-74;g\_\_UBA11524  
11.88 d\_Bacteria;p\_\_Firmicutes;c\_\_Bacilli;o\_\_RF39;f\_\_UBA660;g\_\_CAG-302  
99.1 d\_Bacteria;p\_\_Firmicutes;c\_\_Clostridia;o\_\_Lachnospirales;f\_\_Lachnospiraceae;g\_\_Coproccoccus  
74.56 d\_Bacteria;p\_\_Verrucomicrobiota;c\_\_Verrucomicrobiae;o\_\_Verrucomicrobiales;f\_\_Akkermansiaceae;g\_\_Akkermansia  
d\_Bacteria;p\_\_Firmicutes;c\_\_Clostridia;o\_\_Oscillospirales;f\_\_Ruminococcaceae;g\_\_Faecalibacterium  
18.24 d\_Bacteria;p\_\_Firmicutes;c\_\_Clostridia;o\_\_Oscillospirales;f\_\_Ruminococcaceae;g\_\_Massilibacteriae  
67.51 d\_Bacteria;p\_\_Firmicutes;c\_\_Clostridia;o\_\_Oscillospirales;f\_\_Ruminococcaceae;g\_\_Faecalibacterium  
93.01 d\_Bacteria;p\_\_Bacteroidota;c\_\_Bacteroidia;o\_\_Bacteroidales;f\_\_Rikenellaceae;g\_\_Alistipes  
33.58 d\_Bacteria;p\_\_Firmicutes;c\_\_Clostridia;o\_\_Oscillospirales;f\_\_Oscillospiraceae;g\_\_UMGS1766  
17.71 d\_Bacteria;p\_\_Bacteroidota;c\_\_Bacteroidia;o\_\_Bacteroidales;f\_\_Rikenellaceae;g\_\_Alistipes  
7.09 d\_Bacteria;p\_\_Bacteroidota;c\_\_Bacteroidia;o\_\_Bacteroidales;f\_\_Rikenellaceae;g\_\_Alistipes  
7.09 d\_Bacteria;p\_\_Bacteroidota;c\_\_Bacteroidia;o\_\_Bacteroidales;f\_\_Bacteroidaceae;g\_\_Bacteroides  
99.81 d\_Bacteria;p\_\_Firmicutes;c\_\_Clostridia;o\_\_Oscillospirales;f\_\_Ruminococcaceae;g\_\_Ruminococcus\_D  
26.24 d\_Bacteria;p\_\_Firmicutes;c\_\_Clostridia;o\_\_Monoglobales;f\_\_Monoglobaceae;g\_\_Monoglobus  
13.68 d\_Bacteria;p\_\_Firmicutes;c\_\_Clostridia;o\_\_Christensenellales;f\_\_CAG-138;g\_\_UBAS394  
5.9 d\_Bacteria;p\_\_Firmicutes;c\_\_Clostridia;o\_\_Oscillospirales;f\_\_Ruminococcaceae;g\_\_Ruminococcus\_D  
16.94 d\_Bacteria;p\_\_Bacteroidota;c\_\_Bacteroidia;o\_\_Bacteroidales;f\_\_Rikenellaceae;g\_\_Alistipes  
32.65 d\_Bacteria;p\_\_Firmicutes;c\_\_Clostridia;o\_\_Oscillospirales;f\_\_Oscillospiraceae;g\_\_UBAS446  
20.02 d\_Bacteria;p\_\_Firmicutes;c\_\_Clostridia;o\_\_Oscillospirales;f\_\_Ruminococcaceae;g\_\_Gemmiger

94.3 RaFAH;96.00  
94.3 RaFAH;96.00  
94.5 CRISPR;96.10  
99.6 RaFAH;93.20 blast;91.90 iPhoP-RF;82.50  
98.7 CRISPR;99.00 blast;93.10 iPhoP-RF;64.00 RaFAH;50.00  
99.1 iPhoP-RF;96.10 blast;93.90 RaFAH;90.50  
94.9 iPhoP-RF;96.40 blast;68.30  
98.8 iPhoP-RF;96.70 blast;93.90 RaFAH;86.60  
100 RaFAH;99.10 blast;96.50 iPhoP-RF;61.40  
93 blast;95.00 iPhoP-RF;70.60 CRISPR;68.20  
97.6 blast;96.80 iPhoP-RF;95.10 RaFAH;72.80  
94.9 iPhoP-RF;96.40 blast;88.20  
100 RaFAH;99.30 iPhoP-RF;97.10 blast;96.70  
100 RaFAH;98.90 blast;98.40 iPhoP-RF;95.40  
98.5 RaFAH;98.90  
90.3 blast;92.80  
99.7 CRISPR;99.70 iPhoP-RF;94.40 blast;93.60  
97.9 CRISPR;98.50 blast;93.10 iPhoP-RF;92.10  
96.9 RaFAH;95.10 CRISPR;68.30 iPhoP-RF;64.80  
93.1 RaFAH;95.10  
92.7 CRISPR;94.80  
98.4 CRISPR;98.80 iPhoP-RF;97.10 blast;93.30  
98.3 blast;92.00 iPhoP-RF;86.00 RaFAH;72.50  
97 CRISPR;97.90 iPhoP-RF;81.60  
96.2 RaFAH;97.30  
96.2 RaFAH;97.30  
96.2 RaFAH;97.30  
99.9 CRISPR;99.00 iPhoP-RF;95.40 blast;93.40 RaFAH;91.70  
91.1 blast;93.50 iPhoP-RF;66.80  
94.2 blast;95.90 iPhoP-RF;79.50  
95 RaFAH;87.80 iPhoP-RF;77.80 CRISPR;68.10  
91.4 blast;93.70 iPhoP-RF;53.00  
98.4 CRISPR;98.80 iPhoP-RF;95.10  
95.9 RaFAH;97.10  
97.6 iPhoP-RF;93.40 blast;93.30 RaFAH;87.30  
91 blast;93.40 iPhoP-RF;60.30  
95 blast;96.50 iPhoP-RF;87.30  
94 blast;95.80 CRISPR;80.80 iPhoP-RF;79.80  
99.7 blast;99.00 iPhoP-RF;97.10 CRISPR;94.60 RaFAH;84.50  
91.6 blast;93.90 iPhoP-RF;75.20  
94.6 blast;96.20 iPhoP-RF;85.70  
94.5 iPhoP-RF;96.10 blast;93.90  
97.2 CRISPR;98.00 blast;96.90 iPhoP-RF;93.10  
100 RaFAH;99.00 CRISPR;97.60 iPhoP-RF;97.10 blast;90.90  
96.6 CRISPR;97.60 iPhoP-RF;97.10 blast;94.60  
99.4 iPhoP-RF;97.10 blast;95.20 RaFAH;91.80 CRISPR;60.90  
95.9 iPhoP-RF;97.10 blast;81.50  
94.3 blast;96.00 iPhoP-RF;93.10  
100 RaFAH;98.20 iPhoP-RF;96.70 blast;89.50  
97.6 CRISPR;98.30 blast;96.20 iPhoP-RF;95.70  
94.5 iPhoP-RF;96.10  
93.5 iPhoP-RF;95.40 blast;93.80  
93.5 iPhoP-RF;95.40  
92.6 iPhoP-RF;94.70  
98.7 CRISPR;99.00 blast;96.10  
97.8 blast;98.20 RaFAH;56.20 iPhoP-RF;53.30  
96 blast;96.80 RaFAH;56.20 iPhoP-RF;50.90  
99.6 CRISPR;99.60 blast;96.60 iPhoP-RF;85.70  
92.7 blast;94.80  
94 blast;95.80 iPhoP-RF;71.70  
100 RaFAH;99.70 CRISPR;99.60 blast;96.80 iPhoP-RF;81.10  
96 CRISPR;97.20 iPhoP-RF;82.80  
93 blast;95.00 iPhoP-RF;58.40  
100 RaFAH;99.30 CRISPR;98.90 blast;93.60 iPhoP-RF;85.70  
98.4 iPhoP-RF;97.10 blast;96.90 RaFAH;79.60  
91 blast;93.40  
95.9 iPhoP-RF;97.10 blast;96.90  
95.9 iPhoP-RF;97.10 blast;96.90  
92.9 RaFAH;94.90  
99 blast;96.90 iPhoP-RF;90.50 RaFAH;86.90  
95 blast;96.50 iPhoP-RF;64.50  
92.6 CRISPR;94.70 blast;92.60 iPhoP-RF;74.30  
97 blast;97.90 iPhoP-RF;97.10 CRISPR;96.60  
97.6 blast;93.90 iPhoP-RF;90.10 RaFAH;85.80  
95 blast;96.50 CRISPR;82.40 iPhoP-RF;65.30  
98.5 CRISPR;98.90 blast;98.30 iPhoP-RF;94.40

S16\_vs\_78361 75.01 d\_Bacteria;p\_Actinobacteriota;c\_Actinomycetia;o\_Actinomycetales;f\_Bifidobacteriaceae;g\_Bifidobacterium  
S16\_vs\_78429 22.27 d\_Bacteria;p\_Firmicutes;c\_Clostridia;o\_Oscillospirales;f\_Oscillospiraceae;g\_ER4  
S16\_vs\_80244 99.97 d\_Bacteria;p\_Bacteroidota;c\_Bacteroidia;o\_Bacteroidales;f\_Bacteroidaceae;g\_Bacteroides  
S16\_vs\_80244 99.97 d\_Bacteria;p\_Bacteroidota;c\_Bacteroidia;o\_Bacteroidales;f\_Bacteroidaceae;g\_Phocaeicola  
S16\_vs\_81805 99.42 d\_Bacteria;p\_Firmicutes;c\_Clostridia;o\_Oscillospirales;f\_Ruminococcaceae;g\_Ruthenibacterium  
S16\_vs\_82116 98.74 d\_Bacteria;p\_Firmicutes;c\_Clostridia;o\_Oscillospirales;f\_Acutalibacteraceae;g\_Ruminococcus\_E  
S17\_vf\_128147 3.97 d\_Bacteria;p\_Bacteroidota;c\_Bacteroidia;o\_Bacteroidales;f\_Bacteroidaceae;g\_Bacteroides  
S17\_vf\_128147 3.97 d\_Bacteria;p\_Bacteroidota;c\_Bacteroidia;o\_Bacteroidales;f\_Bacteroidaceae;g\_Bacteroides\_G  
S17\_vf\_128147 3.97 d\_Bacteria;p\_Bacteroidota;c\_Bacteroidia;o\_Bacteroidales;f\_Bacteroidaceae;g\_Phocaeicola  
S17\_vf\_140653 90.58 d\_Bacteria;p\_Bacteroidota;c\_Bacteroidia;o\_Bacteroidales;f\_Bacteroidaceae;g\_Bacteroides  
S17\_vf\_174033 68.79 d\_Bacteria;p\_Firmicutes;c\_Clostridia;o\_Oscillospirales;f\_Ruminococcaceae;g\_Ruminococcus\_D  
S17\_vf\_174033 68.79 d\_Bacteria;p\_Firmicutes;c\_Clostridia;o\_Oscillospirales;f\_Acutalibacteraceae;g\_Ruminococcus\_E  
S17\_vf\_35138 84.47 d\_Bacteria;p\_Bacteroidota;c\_Bacteroidia;o\_Bacteroidales;f\_Barnesiellaceae;g\_Barnesiella  
S17\_vf\_36452 12 d\_Bacteria;p\_Firmicutes;c\_Clostridia;o\_Lachnospirales;f\_Lachnospiraceae;g\_Muricomes  
S17\_vf\_46388 50.05 d\_Bacteria;p\_Firmicutes;c\_Clostridia;o\_Lachnospirales;f\_Lachnospiraceae;g\_Blautia\_A  
S17\_vf\_81232 50.04 d\_Bacteria;p\_Bacteroidota;c\_Bacteroidia;o\_Bacteroidales;f\_Tannerellaceae;g\_Parabacteroides  
S17\_vf\_97671 81.31 d\_Bacteria;p\_Firmicutes;c\_Clostridia;o\_Oscillospirales;f\_Oscillospiraceae;g\_Lawsonibacter  
S17\_vs\_103009 22.09 d\_Bacteria;p\_Firmicutes;c\_Clostridia;o\_Oscillospirales;f\_Oscillospiraceae;g\_ER4  
S17\_vs\_110666 98.39 d\_Bacteria;p\_Firmicutes;c\_Clostridia;o\_Oscillospirales;f\_Ruminococcaceae;g\_Faecalibacterium  
S17\_vs\_116640 83.12 d\_Bacteria;p\_Bacteroidota;c\_Bacteroidia;o\_Bacteroidales;f\_Bacteroidaceae;g\_Bacteroides  
S17\_vs\_117507 40.08 d\_Bacteria;p\_Bacteroidota;c\_Bacteroidia;o\_Bacteroidales;f\_Bacteroidaceae;g\_Bacteroides  
S17\_vs\_127519 61.22 d\_Bacteria;p\_Firmicutes;c\_Clostridia;o\_Oscillospirales;f\_Oscillospiraceae;g\_Dysosmobacter  
S17\_vs\_157209 25.09 d\_Bacteria;p\_Bacteroidota;c\_Bacteroidia;o\_Bacteroidales;f\_Rikenellaceae;g\_Alistipes  
S17\_vs\_160502 60.44 d\_Bacteria;p\_Bacteroidota;c\_Bacteroidia;o\_Bacteroidales;f\_Bacteroidaceae;g\_Bacteroides  
S17\_vs\_160502 60.44 d\_Bacteria;p\_Bacteroidota;c\_Bacteroidia;o\_Bacteroidales;f\_Bacteroidaceae;g\_Phocaeicola  
S17\_vs\_177196 18.1 d\_Bacteria;p\_Bacteroidota;c\_Bacteroidia;o\_Bacteroidales;f\_Rikenellaceae;g\_Alistipes  
S17\_vs\_177203 71.95 d\_Bacteria;p\_Desulfobacterota;c\_Desulfovibrionia;o\_Desulfovibrionales;f\_Desulfovibrionaceae;g\_Bilophila  
S17\_vs\_2079 67.97 d\_Bacteria;p\_Bacteroidota;c\_Bacteroidia;o\_Bacteroidales;f\_Bacteroidaceae;g\_Bacteroides  
S17\_vs\_31654 36.85 d\_Bacteria;p\_Firmicutes;c\_Bacilli;o\_Erysipelotrichales;f\_Erysipelotrichaceae;g\_Faecalibacillus  
S17\_vs\_39515 82.52 d\_Bacteria;p\_Bacteroidota;c\_Bacteroidia;o\_Bacteroidales;f\_Bacteroidaceae;g\_Bacteroides  
S17\_vs\_39515 82.52 d\_Bacteria;p\_Bacteroidota;c\_Bacteroidia;o\_Bacteroidales;f\_Bacteroidaceae;g\_Phocaeicola  
S17\_vs\_43307 72.14 d\_Bacteria;p\_Bacteroidota;c\_Bacteroidia;o\_Bacteroidales;f\_Tannerellaceae;g\_Parabacteroides  
S17\_vs\_8690 6.78 d\_Bacteria;p\_Proteobacteria;c\_Alphaproteobacteria;o\_RF32;f\_CAG-239;g\_CAG-495  
S17\_vs\_8690 6.78 d\_Bacteria;p\_Proteobacteria;c\_Alphaproteobacteria;o\_RF32;f\_CAG-239;g\_Scatocola  
S1\_vf\_136526 33.32 d\_Bacteria;p\_Firmicutes;c\_Clostridia;o\_Oscillospirales;f\_Oscillospiraceae;g\_CAG-170  
S1\_vf\_158961 9.7 d\_Bacteria;p\_Firmicutes;c\_Clostridia;o\_Christensenellales;f\_CAG-74;g\_UBA11524  
S1\_vf\_159951 22.14 d\_Bacteria;p\_Bacteroidota;c\_Bacteroidia;o\_Bacteroidales;f\_Rikenellaceae;g\_Alistipes  
S1\_vf\_22149 43.65 d\_Bacteria;p\_Firmicutes;c\_Clostridia;o\_Oscillospirales;f\_Oscillospiraceae;g\_ER4  
S1\_vf\_28398 12.4 d\_Bacteria;p\_Firmicutes;c\_Clostridia;o\_Oscillospirales;f\_Ruminococcaceae;g\_Gemmiger  
S1\_vf\_6272 25.47 d\_Bacteria;p\_Firmicutes;c\_Clostridia;o\_Oscillospirales;f\_Oscillospiraceae;g\_CAG-170  
S1\_vs\_117317 21.23 d\_Bacteria;p\_Firmicutes;c\_Clostridia;o\_Oscillospirales;f\_Oscillospiraceae;g\_CAG-170  
S1\_vs\_133577 37.09 d\_Bacteria;p\_Firmicutes;c\_Clostridia;o\_Oscillospirales;f\_Ruminococcaceae;g\_Gemmiger  
S1\_vs\_143929 42.31 d\_Bacteria;p\_Firmicutes;c\_Clostridia;o\_Oscillospirales;f\_Oscillospiraceae;g\_ER4  
S1\_vs\_145792 13.59 d\_Bacteria;p\_Firmicutes;c\_Clostridia;o\_Lachnospirales;f\_Anaerotrignaceae;g\_Anaerotrignum  
S1\_vs\_155183 31.14 d\_Bacteria;p\_Firmicutes;c\_Clostridia;o\_Oscillospirales;f\_Oscillospiraceae;g\_ER4  
S1\_vs\_23682 33.26 d\_Bacteria;p\_Firmicutes;c\_Clostridia;o\_Oscillospirales;f\_Ruminococcaceae;g\_Faecalibacterium  
S2\_vf\_16829 81.02 d\_Bacteria;p\_Actinobacteriota;c\_Coribacteriales;o\_Coribacteriales;f\_Eggerthellaceae;g\_Eggerthella  
S2\_vf\_17850 11.78 d\_Bacteria;p\_Firmicutes;c\_Clostridia;o\_Lachnospirales;f\_Lachnospiraceae;g\_Muricomes  
S2\_vf\_20910 5.26 d\_Bacteria;p\_Firmicutes;c\_Bacilli;o\_Erysipelotrichales;f\_Erysipelotrichaceae;g\_Clostridium\_AQ  
S2\_vs\_10289 67.97 d\_Bacteria;p\_Bacteroidota;c\_Bacteroidia;o\_Bacteroidales;f\_Bacteroidaceae;g\_Bacteroides  
S2\_vs\_7306 96.01 d\_Bacteria;p\_Bacteroidota;c\_Bacteroidia;o\_Bacteroidales;f\_Tannerellaceae;g\_Parabacteroides  
S2\_vs\_7306 96.01 d\_Bacteria;p\_Bacteroidota;c\_Bacteroidia;o\_Bacteroidales;f\_Marinifilaceae;g\_Odoribacter  
S3\_vs\_100440 98.85 d\_Bacteria;p\_Firmicutes;c\_Clostridia;o\_Clostridiales;f\_Clostridiaceae;g\_Clostridium  
S3\_vf\_100440 98.85 d\_Bacteria;p\_Firmicutes;c\_Clostridia;o\_Clostridiales;f\_Clostridiaceae;g\_Clostridium\_F  
S3\_vf\_100440 98.85 d\_Bacteria;p\_Firmicutes;c\_Clostridia;o\_Clostridiales;f\_Clostridiaceae;g\_Clostridium\_P  
S3\_vf\_101611 23.54 d\_Bacteria;p\_Firmicutes;c\_Clostridia;o\_Monoglobales;f\_Monoglobaceae;g\_Monoglobus  
S3\_vf\_106401 12.56 d\_Bacteria;p\_Firmicutes;c\_Bacilli;o\_Haloplasmatales;f\_Turicibacteraceae;g\_Turicibacter  
S3\_vf\_108959 42.95 d\_Bacteria;p\_Firmicutes;c\_Clostridia;o\_Lachnospirales;f\_Lachnospiraceae;g\_Lachnospira  
S3\_vf\_111893 41.65 d\_Bacteria;p\_Firmicutes;c\_Clostridia;o\_Oscillospirales;f\_Ruminococcaceae;g\_Ruminococcus\_D  
S3\_vf\_11428 94.85 d\_Bacteria;p\_Firmicutes;c\_Clostridia;o\_Lachnospirales;f\_Lachnospiraceae;g\_Blautia\_A  
S3\_vf\_11428 94.85 d\_Bacteria;p\_Firmicutes;c\_Clostridia;o\_Lachnospirales;f\_Lachnospiraceae;g\_Blautia  
S3\_vf\_115304 34.34 d\_Bacteria;p\_Spirochaetota;c\_Spirochaetia;o\_Sphaerochaetales;f\_Sphaerochaetaceae;g\_UBA9732  
S3\_vf\_127392 52.43 d\_Bacteria;p\_Firmicutes;c\_Clostridia;o\_Oscillospirales;f\_CAG-272;g\_CAG-272  
S3\_vf\_127399 23.09 d\_Bacteria;p\_Bacteroidota;c\_Bacteroidia;o\_Bacteroidales;f\_Bacteroidaceae;g\_Bacteroides  
S3\_vf\_127400 54.09 d\_Bacteria;p\_Firmicutes;c\_Clostridia;o\_Oscillospirales;f\_Oscillospiraceae;g\_ER4  
S3\_vf\_127405 98.09 d\_Bacteria;p\_Firmicutes;c\_Clostridia;o\_Lachnospirales;f\_Lachnospiraceae;g\_Lachnospira  
S3\_vf\_127405 98.09 d\_Bacteria;p\_Firmicutes;c\_Clostridia;o\_Lachnospirales;f\_Lachnospiraceae;g\_Eubacterium\_G  
S3\_vf\_127406 89.48 d\_Bacteria;p\_Bacteroidota;c\_Bacteroidia;o\_Bacteroidales;f\_Rikenellaceae;g\_Alistipes  
S3\_vf\_127406 89.48 d\_Bacteria;p\_Bacteroidota;c\_Bacteroidia;o\_Bacteroidales;f\_Rikenellaceae;g\_Alistipes\_A  
S3\_vf\_127406 89.48 d\_Bacteria;p\_Bacteroidota;c\_Bacteroidia;o\_Bacteroidales;f\_Bacteroidaceae;g\_UBA6398  
S3\_vf\_127408 6.08 d\_Bacteria;p\_Actinobacteriota;c\_Actinomycetia;o\_Actinomycetales;f\_Bifidobacteriaceae;g\_Bifidobacterium  
S3\_vf\_127409 96.84 d\_Bacteria;p\_Firmicutes;c\_Clostridia;o\_Oscillospirales;f\_Ruminococcaceae;g\_Faecalibacterium  
S3\_vf\_127450 8.34 d\_Bacteria;p\_Bacteroidota;c\_Bacteroidia;o\_Bacteroidales;f\_Bacteroidaceae;g\_Prevotella  
S3\_vf\_18080 96.93 d\_Bacteria;p\_Bacteroidota;c\_Bacteroidia;o\_Bacteroidales;f\_Bacteroidaceae;g\_Bacteroides  
S3\_vf\_18080 96.93 d\_Bacteria;p\_Bacteroidota;c\_Bacteroidia;o\_Bacteroidales;f\_Bacteroidaceae;g\_Phocaeicola  
S3\_vf\_18829 63.94 d\_Bacteria;p\_Bacteroidota;c\_Bacteroidia;o\_Bacteroidales;f\_Bacteroidaceae;g\_Bacteroides

98.5 CRISPR;98.90 iPhoP-RF;97.10 blast;96.90  
91.5 blast;93.80 iPhoP-RF;52.80  
99.7 iPhoP-RF;97.10 RaFAH;95.20 blast;89.20  
92.2 iPhoP-RF;94.40 blast;93.80  
94.7 blast;96.30 iPhoP-RF;89.50 CRISPR;57.90  
99.6 CRISPR;98.90 blast;96.90 iPhoP-RF;94.10 RaFAH;81.90  
95.9 blast;97.10 iPhoP-RF;97.10 CRISPR;89.30  
94.5 iPhoP-RF;96.10  
91 iPhoP-RF;93.40 blast;85.40  
99.7 blast;96.70 RaFAH;95.30 iPhoP-RF;85.70  
99.7 blast;97.00 iPhoP-RF;95.40 RaFAH;94.60 CRISPR;72.00  
92.5 RaFAH;94.60  
99.1 blast;96.80 RaFAH;88.80 CRISPR;59.60  
97.8 CRISPR;98.40 iPhoP-RF;90.80  
99.4 CRISPR;97.10 blast;94.50 iPhoP-RF;93.70 RaFAH;91.90  
97.8 blast;98.40 iPhoP-RF;95.10 CRISPR;83.70  
90.2 blast;92.70 iPhoP-RF;73.20  
96.7 blast;97.70 iPhoP-RF;65.10  
100 RaFAH;99.70 blast;96.80 iPhoP-RF;93.40 CRISPR;67.80  
91 RaFAH;93.40  
97.5 blast;97.40 iPhoP-RF;96.40 RaFAH;66.20  
91.2 blast;93.60 iPhoP-RF;86.70  
97.6 CRISPR;98.30 blast;95.20 iPhoP-RF;92.80  
99.9 iPhoP-RF;97.10 RaFAH;96.60 blast;92.60 CRISPR;56.20  
95.9 iPhoP-RF;97.10 blast;84.10  
96.4 blast;91.90 iPhoP-RF;88.50 RaFAH;84.30  
93.9 blast;95.70 iPhoP-RF;90.10  
100 RaFAH;98.90 iPhoP-RF;94.40 blast;92.60  
94.6 blast;96.20 iPhoP-RF;81.60 CRISPR;54.30  
100 RaFAH;99.30 iPhoP-RF;97.10 blast;92.90  
95.3 iPhoP-RF;96.70  
95.4 blast;96.80 CRISPR;96.70 iPhoP-RF;93.40  
95.2 blast;96.60  
94.9 blast;96.40 iPhoP-RF;59.50  
91.6 blast;93.90 iPhoP-RF;88.50  
95 blast;96.50 iPhoP-RF;77.30  
95.4 CRISPR;96.80 iPhoP-RF;72.20  
90.8 blast;93.20 iPhoP-RF;88.90  
91.6 blast;93.90 iPhoP-RF;75.40  
92 CRISPR;94.20 blast;90.80 iPhoP-RF;78.00  
93.4 blast;95.30 iPhoP-RF;89.50 CRISPR;71.10  
96 blast;97.20 CRISPR;95.40 iPhoP-RF;94.40  
91.6 blast;93.90 iPhoP-RF;75.00  
94.6 blast;96.20 iPhoP-RF;72.60  
95.9 CRISPR;97.10 blast;96.20 iPhoP-RF;89.20  
98.8 CRISPR;99.10 blast;96.20 iPhoP-RF;83.30  
94.9 CRISPR;96.40 iPhoP-RF;53.80 RaFAH;50.20  
92.7 CRISPR;94.80 iPhoP-RF;78.70  
97.2 CRISPR;98.00  
100 RaFAH;98.90 blast;96.80 iPhoP-RF;87.90  
93 blast;95.00 iPhoP-RF;73.70  
90 RaFAH;89.40 CRISPR;64.40  
94.7 RaFAH;96.30  
94.7 RaFAH;96.30  
94.7 RaFAH;96.30  
95.2 blast;96.60  
92 blast;94.20 iPhoP-RF;66.30  
99.3 CRISPR;99.30 blast;91.90 iPhoP-RF;88.90 RaFAH;55.00  
95.4 blast;96.80 CRISPR;96.10 iPhoP-RF;94.10  
100 RaFAH;98.90 CRISPR;97.00 iPhoP-RF;93.40 blast;91.70  
98.5 RaFAH;98.90  
91.2 blast;93.60 iPhoP-RF;81.90  
92.1 blast;94.30 iPhoP-RF;52.20  
90.4 RaFAH;92.90  
95 blast;96.50 iPhoP-RF;76.40 CRISPR;67.10  
99.9 CRISPR;98.90 RaFAH;91.60 iPhoP-RF;90.80 blast;80.40  
96.9 RaFAH;91.60 blast;87.20  
97.8 RaFAH;98.40  
97.8 RaFAH;98.40  
91.6 blast;93.90 iPhoP-RF;84.80  
98.5 blast;98.90 CRISPR;97.60 iPhoP-RF;96.70  
95.9 CRISPR;97.00 blast;95.70 iPhoP-RF;81.10 RaFAH;51.90  
92.3 RaFAH;94.50  
99.7 iPhoP-RF;97.10 blast;96.10 RaFAH;94.50 CRISPR;81.40  
91.8 iPhoP-RF;94.10 CRISPR;80.00 blast;78.90  
91.8 iPhoP-RF;94.10 CRISPR;73.10

S3\_vf\_23042 83.69 d\_Bacteria;p\_Firmicutes;c\_Bacilli;o\_Lactobacillales;f\_Streptococcaceae;g\_Lactococcus  
S3\_vf\_44405 96.43 d\_Bacteria;p\_Actinobacteriota;c\_Actinomycetia;o\_Actinomycetales;f\_Actinomycetaceae;g\_Actinomyces  
S3\_vf\_44405 96.43 d\_Bacteria;p\_Actinobacteriota;c\_Actinomycetia;o\_Actinomycetales;f\_Actinomycetaceae;g\_Pauljensenia  
S3\_vf\_54353 46.9 d\_Bacteria;p\_Actinobacteriota;c\_Actinomycetia;o\_Actinomycetales;f\_Actinomycetaceae;g\_Actinomyces  
S3\_vf\_54353 46.9 d\_Bacteria;p\_Actinobacteriota;c\_Actinomycetia;o\_Actinomycetales;f\_Actinomycetaceae;g\_Pauljensenia  
S3\_vf\_5525 41.37 d\_Bacteria;p\_Actinobacteriota;c\_Actinomycetia;o\_Actinomycetales;f\_Actinomycetaceae;g\_Actinomyces  
S3\_vf\_56363 23.06 d\_Bacteria;p\_Firmicutes;c\_Clostridia;o\_Peptostreptococcales;f\_Peptostreptococcaceae;g\_GCA-900066495  
S3\_vf\_67333 76.26 d\_Bacteria;p\_Firmicutes;c\_Clostridia;o\_Lachnospirales;f\_Lachnospiraceae;g\_Agathobacter  
S3\_vf\_67333 76.26 d\_Bacteria;p\_Firmicutes;c\_Clostridia;o\_Lachnospirales;f\_Lachnospiraceae;g\_Roseburia  
S3\_vf\_67333 76.26 d\_Bacteria;p\_Firmicutes;c\_Clostridia;o\_Lachnospirales;f\_Lachnospiraceae;g\_RUG115  
S3\_vf\_67333 76.26 d\_Bacteria;p\_Firmicutes;c\_Clostridia;o\_Lachnospirales;f\_Lachnospiraceae;g\_Lachnospira  
S3\_vf\_67333 76.26 d\_Bacteria;p\_Firmicutes;c\_Clostridia;o\_Lachnospirales;f\_Lachnospiraceae;g\_Eubacterium\_F  
S3\_vf\_67828 d\_Bacteria;p\_Bacteroidota;c\_Bacteroidia;o\_Bacteroidales;f\_Rikenellaceae;g\_Alistipes  
S3\_vf\_70746 87.64 d\_Bacteria;p\_Actinobacteriota;c\_Actinomycetia;o\_Actinomycetales;f\_Bifidobacteriaceae;g\_Bifidobacterium  
S3\_vf\_7137 5.31 d\_Bacteria;p\_Actinobacteriota;c\_Actinomycetia;o\_Actinomycetales;f\_Bifidobacteriaceae;g\_Bifidobacterium  
S3\_vf\_73597 55.3 d\_Bacteria;p\_Bacteroidota;c\_Bacteroidia;o\_Bacteroidales;f\_Bacteroidaceae;g\_Bacteroides  
S3\_vf\_73597 55.3 d\_Bacteria;p\_Bacteroidota;c\_Bacteroidia;o\_Bacteroidales;f\_Bacteroidaceae;g\_Phocaeicola  
S3\_vf\_80287 52.73 d\_Bacteria;p\_Firmicutes;c\_Clostridia;o\_Oscillospirales;f\_Ruminococcaceae;g\_D5  
S3\_vf\_8058 98.11 d\_Bacteria;p\_Firmicutes;c\_Clostridia;o\_Lachnospirales;f\_Lachnospiraceae;g\_Blautia\_A  
S3\_vf\_8164 10.61 d\_Bacteria;p\_Firmicutes;c\_Clostridia;o\_Oscillospirales;f\_Ruminococcaceae;g\_Ruminococcus\_D  
S3\_vf\_82571 21.78 d\_Bacteria;p\_Firmicutes;c\_Clostridia;o\_Oscillospirales;f\_Oscillospiraceae;g\_CAG-170  
S3\_vf\_99626 26.68 d\_Bacteria;p\_Actinobacteriota;c\_Coribacteriota;o\_Coribacteriales;f\_Coribacteriaceae;g\_Collinsella  
S3\_vf\_99734 99.18 d\_Bacteria;p\_Firmicutes;c\_Clostridia;o\_Oscillospirales;f\_Ruminococcaceae;g\_Faecalibacterium  
S3\_vf\_99734 99.18 d\_Bacteria;p\_Firmicutes;c\_Clostridia;o\_Oscillospirales;f\_Oscillospiraceae;g\_CAG-83  
S3\_vf\_99734 99.18 d\_Bacteria;p\_Firmicutes;c\_Clostridia;o\_Oscillospirales;f\_Oscillospiraceae;g\_Dysosmobacter  
S3\_vf\_114271 19.01 d\_Bacteria;p\_Firmicutes;c\_Clostridia;o\_Oscillospirales;f\_Acutalibacteriaceae;g\_Acutalibacter  
S3\_vf\_117894 81.25 d\_Bacteria;p\_Bacteroidota;c\_Bacteroidia;o\_Bacteroidales;f\_Marinifilaceae;g\_Odoribacter  
S3\_vf\_119660 91.3 d\_Bacteria;p\_Bacteroidota;c\_Bacteroidia;o\_Bacteroidales;f\_Bacteroidaceae;g\_Bacteroides  
S3\_vf\_119660 91.3 d\_Bacteria;p\_Bacteroidota;c\_Bacteroidia;o\_Bacteroidales;f\_Bacteroidaceae;g\_CAG-462  
S3\_vf\_119660 91.3 d\_Bacteria;p\_Bacteroidota;c\_Bacteroidia;o\_Bacteroidales;f\_Bacteroidaceae;g\_Phocaeicola  
S3\_vf\_119771 27.39 d\_Bacteria;p\_Firmicutes;c\_Clostridia;o\_Oscillospirales;f\_Ruminococcaceae;g\_Gemmiger  
S3\_vf\_122706 89.75 d\_Bacteria;p\_Firmicutes;c\_Clostridia;o\_Oscillospirales;f\_Acutalibacteriaceae;g\_CAG-217  
S3\_vf\_123834 73.11 d\_Bacteria;p\_Actinobacteriota;c\_Actinomycetia;o\_Actinomycetales;f\_Bifidobacteriaceae;g\_Bifidobacterium  
S3\_vf\_127391 18.32 d\_Bacteria;p\_Firmicutes;c\_Clostridia;o\_Oscillospirales;f\_Ruminococcaceae;g\_Gemmiger  
S3\_vf\_127401 45.54 d\_Bacteria;p\_Firmicutes;c\_Clostridia;o\_Lachnospirales;f\_Lachnospiraceae;g\_Lachnospira  
S3\_vf\_127411 9.3 d\_Bacteria;p\_Firmicutes;c\_Clostridia;o\_Oscillospirales;f\_Oscillospiraceae;g\_ER4  
S3\_vf\_127413 23.82 d\_Bacteria;p\_Bacteroidota;c\_Bacteroidia;o\_Bacteroidales;f\_Rikenellaceae;g\_Alistipes  
S3\_vf\_127421 95.6 d\_Bacteria;p\_Firmicutes;c\_Clostridia;o\_Lachnospirales;f\_Lachnospiraceae;g\_Agathobacter  
S3\_vf\_127421 95.6 d\_Bacteria;p\_Firmicutes;c\_Clostridia;o\_Lachnospirales;f\_Lachnospiraceae;g\_Roseburia  
S3\_vf\_127421 95.6 d\_Bacteria;p\_Firmicutes;c\_Clostridia;o\_Lachnospirales;f\_Lachnospiraceae;g\_RUG115  
S3\_vf\_127421 95.6 d\_Bacteria;p\_Firmicutes;c\_Clostridia;o\_Lachnospirales;f\_Lachnospiraceae;g\_CAG-45  
S3\_vf\_127442 d\_Bacteria;p\_Bacteroidota;c\_Bacteroidia;o\_Bacteroidales;f\_P3;g\_Phil12  
S3\_vf\_15450 21.5 d\_Bacteria;p\_Firmicutes;c\_Clostridia;o\_Oscillospirales;f\_Ruminococcaceae;g\_Gemmiger  
S3\_vf\_16825 80.45 d\_Bacteria;p\_Firmicutes;c\_Clostridia;o\_Lachnospirales;f\_Lachnospiraceae;g\_Roseburia  
S3\_vf\_16825 80.45 d\_Bacteria;p\_Firmicutes;c\_Clostridia;o\_Lachnospirales;f\_Lachnospiraceae;g\_Agathobacter  
S3\_vf\_16825 80.45 d\_Bacteria;p\_Firmicutes;c\_Clostridia;o\_Lachnospirales;f\_Lachnospiraceae;g\_RUG115  
S3\_vf\_17168 100 d\_Bacteria;p\_Bacteroidota;c\_Bacteroidia;o\_Bacteroidales;f\_Rikenellaceae;g\_Alistipes  
S3\_vf\_18858 82.07 d\_Bacteria;p\_Firmicutes;c\_Clostridia;o\_Oscillospirales;f\_Acutalibacteriaceae;g\_CAG-217  
S3\_vf\_23194 42.15 d\_Bacteria;p\_Bacteroidota;c\_Bacteroidia;o\_Bacteroidales;f\_Bacteroidaceae;g\_Bacteroides  
S3\_vf\_23194 42.15 d\_Bacteria;p\_Bacteroidota;c\_Bacteroidia;o\_Bacteroidales;f\_Bacteroidaceae;g\_Phocaeicola  
S3\_vf\_25896 11.85 d\_Bacteria;p\_Firmicutes;c\_Clostridia;o\_Oscillospirales;f\_Ruminococcaceae;g\_Ruthenibacterium  
S3\_vf\_29077 34.15 d\_Bacteria;p\_Firmicutes;c\_Clostridia;o\_Oscillospirales;f\_Ruminococcaceae;g\_Ruminococcus\_C  
S3\_vf\_39774 100 d\_Bacteria;p\_Bacteroidota;c\_Bacteroidia;o\_Bacteroidales;f\_Bacteroidaceae;g\_Bacteroides  
S3\_vf\_39940 5.41 d\_Bacteria;p\_Actinobacteriota;c\_Actinomycetia;o\_Actinomycetales;f\_Bifidobacteriaceae;g\_Bifidobacterium  
S3\_vf\_40939 23.65 d\_Bacteria;p\_Bacteroidota;c\_Bacteroidia;o\_Bacteroidales;f\_Bacteroidaceae;g\_Bacteroides  
S3\_vf\_40939 23.65 d\_Bacteria;p\_Bacteroidota;c\_Bacteroidia;o\_Bacteroidales;f\_Bacteroidaceae;g\_Phocaeicola  
S3\_vf\_42569 73.75 d\_Bacteria;p\_Firmicutes;c\_Clostridia;o\_Oscillospirales;f\_Ruminococcaceae;g\_Faecalibacterium  
S3\_vf\_45147 90.75 d\_Bacteria;p\_Bacteroidota;c\_Bacteroidia;o\_Bacteroidales;f\_Bacteroidaceae;g\_Bacteroides  
S3\_vf\_45147 90.75 d\_Bacteria;p\_Bacteroidota;c\_Bacteroidia;o\_Bacteroidales;f\_Bacteroidaceae;g\_Phocaeicola  
S3\_vf\_49835 13.1 d\_Bacteria;p\_Firmicutes;c\_Clostridia;o\_Oscillospirales;f\_Acutalibacteriaceae;g\_Ruminococcus\_E  
S3\_vf\_50557 23.06 d\_Bacteria;p\_Actinobacteriota;c\_Coribacteriota;o\_Coribacteriales;f\_Eggerthellaceae;g\_Gordonibacter  
S3\_vf\_50924 12.69 d\_Bacteria;p\_Cyanobacteria;c\_Vampirovibrionia;o\_Gastranaerophilales;f\_Gastranaerophilaceae;g\_QAM101  
S3\_vf\_51931 21.18 d\_Bacteria;p\_Proteobacteria;c\_Gammaproteobacteria;o\_Burkholderiales;f\_Burkholderiaceae;g\_Sutterella  
S3\_vf\_54303 46.83 d\_Bacteria;p\_Firmicutes;c\_Clostridia;o\_Oscillospirales;f\_Oscillospiraceae;g\_  
S3\_vf\_56292 99.95 d\_Bacteria;p\_Bacteroidota;c\_Bacteroidia;o\_Bacteroidales;f\_Rikenellaceae;g\_Alistipes  
S3\_vf\_56292 99.95 d\_Bacteria;p\_Bacteroidota;c\_Bacteroidia;o\_Bacteroidales;f\_Rikenellaceae;g\_Alistipes\_A  
S3\_vf\_64424 98.41 d\_Bacteria;p\_Bacteroidota;c\_Bacteroidia;o\_Bacteroidales;f\_Bacteroidaceae;g\_Bacteroides  
S3\_vf\_64424 98.41 d\_Bacteria;p\_Bacteroidota;c\_Bacteroidia;o\_Bacteroidales;f\_Bacteroidaceae;g\_Phocaeicola  
S3\_vf\_6604 75.2 d\_Bacteria;p\_Bacteroidota;c\_Bacteroidia;o\_Bacteroidales;f\_Marinifilaceae;g\_Butyrimonas  
S3\_vf\_68031 27.92 d\_Bacteria;p\_Firmicutes;c\_Clostridia;o\_Oscillospirales;f\_Ruminococcaceae;g\_Faecalibacterium  
S3\_vf\_70508 99.66 d\_Bacteria;p\_Bacteroidota;c\_Bacteroidia;o\_Bacteroidales;f\_Bacteroidaceae;g\_Bacteroides  
S3\_vf\_73361 17.97 d\_Bacteria;p\_Firmicutes;c\_Clostridia;o\_Christensenellales;f\_CAG-138;g\_SFEL01  
S3\_vf\_77156 d\_Bacteria;p\_Bacteroidota;c\_Bacteroidia;o\_Bacteroidales;f\_Rikenellaceae;g\_Alistipes  
S3\_vf\_80151 97.75 d\_Bacteria;p\_Bacteroidota;c\_Bacteroidia;o\_Bacteroidales;f\_Tannerellaceae;g\_Parabacteroides  
S3\_vf\_82895 92.58 d\_Bacteria;p\_Bacteroidota;c\_Bacteroidia;o\_Bacteroidales;f\_Tannerellaceae;g\_Parabacteroides  
S3\_vf\_87728 5.42 d\_Bacteria;p\_Firmicutes;c\_Clostridia;o\_Oscillospirales;f\_Ruminococcaceae;g\_Faecalibacterium

99.7 blast;98.70 iPhoP-RF;90.10 RaFAH;89.50  
100 RaFAH;97.30 CRISPR;92.40 blast;92.10 iPhoP-RF;55.70  
96.2 RaFAH;97.30  
97.8 RaFAH;97.30 iPhoP-RF;70.60  
96.2 RaFAH;97.30  
92.6 RaFAH;85.90 iPhoP-RF;81.10  
91.4 iPhoP-RF;93.70  
99.9 CRISPR;98.90 RaFAH;90.80 blast;85.70 iPhoP-RF;81.90  
99.1 iPhoP-RF;96.10 RaFAH;90.80 blast;90.50  
99 RaFAH;90.80 blast;90.70 iPhoP-RF;77.50  
98.7 CRISPR;99.00 blast;90.70 iPhoP-RF;89.80  
90.4 blast;92.90  
91.5 blast;93.80 iPhoP-RF;64.50  
95.3 iPhoP-RF;96.70 blast;95.90 CRISPR;78.50  
99.7 CRISPR;99.70 iPhoP-RF;77.30  
99.7 CRISPR;97.20 iPhoP-RF;97.10 RaFAH;93.80 blast;93.80  
95.3 iPhoP-RF;96.70  
97.2 CRISPR;98.00 iPhoP-RF;52.20  
98.1 CRISPR;98.60 iPhoP-RF;81.60  
98.2 CRISPR;98.70 blast;96.80 iPhoP-RF;95.10  
93.1 blast;95.10 iPhoP-RF;73.20  
98.7 CRISPR;99.00 iPhoP-RF;97.10 blast;92.10  
95.2 CRISPR;96.60 iPhoP-RF;64.80 blast;60.50  
92 RaFAH;94.20  
92 RaFAH;94.20  
92.1 blast;94.30 iPhoP-RF;56.80  
99.9 blast;98.40 iPhoP-RF;93.10 RaFAH;92.30 CRISPR;53.10  
100 RaFAH;98.50 CRISPR;95.40 iPhoP-RF;95.40 blast;93.90  
96.9 CRISPR;97.80  
90.6 CRISPR;93.00 blast;88.70 iPhoP-RF;75.70  
95.9 blast;97.10 iPhoP-RF;81.40 CRISPR;55.60  
95.3 blast;96.70 iPhoP-RF;79.30  
98.4 CRISPR;98.40 blast;96.90 iPhoP-RF;96.70 RaFAH;61.70  
95.6 blast;96.90 CRISPR;96.30 iPhoP-RF;91.80  
90.4 blast;92.90 iPhoP-RF;70.60  
95.2 blast;96.60 iPhoP-RF;73.20  
97.9 CRISPR;98.50 iPhoP-RF;80.00  
100 CRISPR;98.90 RaFAH;94.40 iPhoP-RF;92.10  
99.9 CRISPR;98.50 iPhoP-RF;96.40 blast;95.20 RaFAH;94.40  
98.2 RaFAH;94.40 iPhoP-RF;88.50  
90.7 iPhoP-RF;93.10  
90.7 iPhoP-RF;93.10  
95.4 blast;96.80 iPhoP-RF;83.90 CRISPR;68.80  
99.7 CRISPR;98.90 iPhoP-RF;96.10 blast;92.80 RaFAH;88.00  
99.4 CRISPR;98.10 iPhoP-RF;93.40 RaFAH;88.00  
97.2 iPhoP-RF;91.80 blast;90.60 RaFAH;88.00  
97.5 blast;96.90 iPhoP-RF;93.10 RaFAH;71.20  
97.9 blast;98.50 iPhoP-RF;86.30 CRISPR;68.10  
100 RaFAH;98.70 iPhoP-RF;97.10  
95.3 iPhoP-RF;96.70 blast;93.10 CRISPR;75.20  
91.4 blast;93.70 iPhoP-RF;78.30  
94.9 blast;96.40 iPhoP-RF;80.00 CRISPR;51.40  
100 RaFAH;99.00 blast;92.00 iPhoP-RF;53.80  
95.9 iPhoP-RF;97.10 blast;96.90 CRISPR;84.00  
99.3 iPhoP-RF;97.10 blast;96.60 RaFAH;89.70  
93.9 iPhoP-RF;95.70 blast;86.80  
99.7 CRISPR;98.30 blast;96.90 RaFAH;90.40 iPhoP-RF;73.70  
99.4 iPhoP-RF;97.10 RaFAH;91.20  
95.9 iPhoP-RF;97.10 CRISPR;60.90  
99 CRISPR;99.20 blast;98.60 iPhoP-RF;93.10  
93.4 CRISPR;95.30 blast;93.90 iPhoP-RF;93.10  
90.4 blast;92.90 iPhoP-RF;57.10  
94.6 CRISPR;96.20 iPhoP-RF;79.00  
91.6 blast;93.90 iPhoP-RF;80.30  
99.9 blast;96.90 RaFAH;96.10 iPhoP-RF;83.60  
94.5 RaFAH;96.10  
100 RaFAH;99.60 iPhoP-RF;97.10 blast;92.20 CRISPR;69.50  
95.4 blast;96.80 iPhoP-RF;96.40 CRISPR;92.60  
95.4 blast;96.80 iPhoP-RF;65.60  
95.6 blast;96.90 iPhoP-RF;73.20 CRISPR;56.90  
100 RaFAH;99.70 iPhoP-RF;93.10 blast;92.70  
96.6 CRISPR;97.60 blast;96.40 iPhoP-RF;91.10  
96.7 CRISPR;97.70 iPhoP-RF;58.40  
100 RaFAH;99.60 iPhoP-RF;94.40 blast;93.80 CRISPR;92.60  
100 CRISPR;99.00 RaFAH;98.20 blast;93.90 iPhoP-RF;93.70  
95.3 blast;96.70 iPhoP-RF;67.00

S3\_vs\_89485 73.42 d\_Bacteria;p\_\_Bacteroidota;c\_\_Bacteroidia;o\_\_Bacteroidales;f\_\_Rikenellaceae;g\_\_Alistipes 95 blast;96.50 iPhoP-RF;93.40  
S3\_vs\_90331 99.17 d\_Bacteria;p\_\_Firmicutes;c\_\_Clostridia;o\_\_Oscillospirales;f\_\_Ruminococcaceae;g\_\_Faecalibacterium 100 RaFAH;98.70 CRISPR;97.70 blast;92.00 iPhoP-RF;85.70  
S3\_vs\_90341 11.42 d\_Bacteria;p\_\_Firmicutes;c\_\_Clostridia;o\_\_Christensenellales;f\_\_CAG-74;g\_\_UBA11524 95.2 blast;96.60 CRISPR;94.50 iPhoP-RF;85.70  
S3\_vs\_90341 11.42 d\_Bacteria;p\_\_Firmicutes;c\_\_Clostridia;o\_\_Christensenellales;f\_\_CAG-74;g\_\_UBA11524 94.9 blast;96.40 iPhoP-RF;85.10  
S3\_vs\_9158 99.96 d\_Bacteria;p\_\_Bacteroidota;c\_\_Bacteroidia;o\_\_Bacteroidales;f\_\_Bacteroidaceae;g\_\_Bacteroides 100 RaFAH;99.60 iPhoP-RF;97.10 blast;96.90  
S3\_vs\_9158 99.96 d\_Bacteria;p\_\_Bacteroidota;c\_\_Bacteroidia;o\_\_Bacteroidales;f\_\_Bacteroidaceae;g\_\_Phocaeicola 95.3 iPhoP-RF;96.70 blast;90.50  
S3\_vs\_94577 45.75 d\_Bacteria;p\_\_Firmicutes;c\_\_Bacilli;o\_\_Erysipelotrichales;f\_\_Erysipelotrichaceae;g\_\_Faecalibacillus 97.8 blast;98.40  
S3\_vs\_95574 22.37 d\_Bacteria;p\_\_Firmicutes;c\_\_Clostridia;o\_\_Oscillospirales;f\_\_Acutalibacteraceae;g\_\_UBA737 90.4 blast;92.90 iPhoP-RF;70.60  
S3\_vs\_97827 10.17 d\_Bacteria;p\_\_Bacteroidota;c\_\_Bacteroidia;o\_\_Bacteroidales;f\_\_Marinifilaceae;g\_\_Odoribacter 97.9 blast;98.50 iPhoP-RF;90.10 CRISPR;71.50  
S3\_vs\_98675 8.18 d\_Bacteria;p\_\_Firmicutes;c\_\_Clostridia;o\_\_Clostridiales;f\_\_Clostridiaceae;g\_\_Clostridium 98.5 blast;96.40 RaFAH;85.10 iPhoP-RF;79.00  
S4\_vf\_10506 17.1 d\_Bacteria;p\_\_Firmicutes;c\_\_Bacilli;o\_\_Erysipelotrichales;f\_\_Erysipelotrichaceae;g\_\_Holdemanella 90.7 blast;93.10  
S4\_vf\_11308 96.94 d\_Bacteria;p\_\_Firmicutes;c\_\_Clostridia;o\_\_Oscillospirales;f\_\_Acutalibacteraceae;g\_\_Ruminococcus\_E 100 CRISPR;98.90 blast;98.50 RaFAH;97.10 iPhoP-RF;93.70  
S4\_vf\_11308 96.94 d\_Bacteria;p\_\_Firmicutes;c\_\_Clostridia;o\_\_Oscillospirales;f\_\_Ruminococcaceae;g\_\_Ruminococcus\_D 95.9 RaFAH;97.10  
S4\_vf\_12614 80.07 d\_Bacteria;p\_\_Bacteroidota;c\_\_Bacteroidia;o\_\_Bacteroidales;f\_\_Barnesiellaceae;g\_\_Barnesiella 98.7 blast;99.00 iPhoP-RF;76.10 CRISPR;67.90  
S4\_vf\_12624 24.52 d\_Bacteria;p\_\_Actinobacteriota;c\_\_Actinomycetia;o\_\_Actinomycetales;f\_\_Bifidobacteriaceae;g\_\_Bifidobacterium 97.5 CRISPR;98.20 blast;96.50 iPhoP-RF;91.80  
S4\_vf\_13353 93.68 d\_Bacteria;p\_\_Firmicutes;c\_\_Clostridia;o\_\_Lachnospirales;f\_\_Lachnospiraceae;g\_\_Blautia\_A 99.9 CRISPR;97.90 RaFAH;95.20 blast;90.90 iPhoP-RF;89.20  
S4\_vf\_13353 93.68 d\_Bacteria;p\_\_Firmicutes;c\_\_Clostridia;o\_\_Lachnospirales;f\_\_Lachnospiraceae;g\_\_Blautia\_A 93.2 RaFAH;95.20  
S4\_vf\_18803 47.59 d\_Bacteria;p\_\_Bacteroidota;c\_\_Bacteroidia;o\_\_Bacteroidales;f\_\_Bacteroidaceae;g\_\_Prevotella 98.5 CRISPR;98.90 iPhoP-RF;74.10  
S4\_vf\_20440 44.47 d\_Bacteria;p\_\_Bacteroidota;c\_\_Bacteroidia;o\_\_Bacteroidales;f\_\_Bacteroidaceae;g\_\_Prevotella 97.8 blast;98.40 iPhoP-RF;84.20  
S4\_vf\_30103 5.83 d\_Bacteria;p\_\_Actinobacteriota;c\_\_Actinomycetia;o\_\_Actinomycetales;f\_\_Bifidobacteriaceae;g\_\_Bifidobacterium 99.7 CRISPR;99.70 iPhoP-RF;92.10  
S4\_vf\_31973 23.92 d\_Bacteria;p\_\_Patescibacteria;c\_\_Paceibacteria;o\_\_UBA9983\_A;f\_\_UBA1006;g\_\_O1-FULL-36-10b 92.2 iPhoP-RF;94.40  
S4\_vf\_31978 62.52 d\_Bacteria;p\_\_Firmicutes;c\_\_Clostridia;o\_\_Lachnospirales;f\_\_Lachnospiraceae;g\_\_Lachnospira 99.6 CRISPR;99.60 blast;93.90 iPhoP-RF;92.40  
S4\_vf\_31979 24.1 d\_Bacteria;p\_\_Firmicutes;c\_\_Clostridia;o\_\_Christensenellales;f\_\_CAG-74;g\_\_Ventricola 92 blast;94.20  
S4\_vf\_31979 24.1 d\_Bacteria;p\_\_Firmicutes;c\_\_Clostridia;o\_\_Christensenellales;f\_\_CAG-74;g\_\_SFFH01 91.5 blast;93.80  
S4\_vf\_31981 29.33 d\_Bacteria;p\_\_Bacteroidota;c\_\_Bacteroidia;o\_\_Bacteroidales;f\_\_Bacteroidaceae;g\_\_Prevotella 97.3 RaFAH;98.10  
S4\_vf\_4838 76.93 d\_Bacteria;p\_\_Bacteroidota;c\_\_Bacteroidia;o\_\_Bacteroidales;f\_\_Tannerellaceae;g\_\_Parabacteroides 97.6 blast;98.30 iPhoP-RF;96.10 CRISPR;71.50  
S4\_vf\_4891 28.59 d\_Bacteria;p\_\_Bacteroidota;c\_\_Bacteroidia;o\_\_Bacteroidales;f\_\_Bacteroidaceae;g\_\_Prevotella 94.6 blast;96.20 CRISPR;93.50 iPhoP-RF;92.10  
S4\_vs\_VIRSorter\_12831-c 21.81 d\_Bacteria;p\_\_Firmicutes;c\_\_Clostridia;o\_\_Lachnospirales;f\_\_Lachnospiraceae;g\_\_Blautia\_A 91.6 blast;93.90 iPhoP-RF;85.10 CRISPR;58.50  
S4\_vs\_VIRSorter\_13190-c 96.31 d\_Bacteria;p\_\_Bacteroidota;c\_\_Bacteroidia;o\_\_Bacteroidales;f\_\_Tannerellaceae;g\_\_Parabacteroides 100 RaFAH;99.80 iPhoP-RF;94.40 blast;91.20 CRISPR;66.50  
S4\_vs\_VIRSorter\_15112-c 16.47 d\_Bacteria;p\_\_Firmicutes;c\_\_Clostridia;o\_\_Peptostreptococcales;f\_\_Peptostreptococcaceae;g\_\_GCA-900066495 91.6 blast;93.90 iPhoP-RF;75.70  
S4\_vs\_VIRSorter\_15837-c 96.3 d\_Bacteria;p\_\_Firmicutes;c\_\_Clostridia;o\_\_Oscillospirales;f\_\_Oscillospiraceae;g\_\_Flavonifractor 97.2 blast;98.00 CRISPR;89.70 iPhoP-RF;84.80  
S4\_vs\_VIRSorter\_16493-c 85.89 d\_Bacteria;p\_\_Actinobacteriota;c\_\_Actinomycetia;o\_\_Actinomycetales;f\_\_Bifidobacteriaceae;g\_\_Bifidobacterium 97.9 CRISPR;98.50 iPhoP-RF;96.40 blast;92.50  
S4\_vs\_VIRSorter\_19324-c 25.86 d\_Bacteria;p\_\_Firmicutes;c\_\_Clostridia;o\_\_Lachnospirales;f\_\_Lachnospiraceae;g\_\_Mediterraneibacter 91.4 blast;93.70 iPhoP-RF;76.40  
S4\_vs\_VIRSorter\_19324-c 25.86 d\_Bacteria;p\_\_Firmicutes;c\_\_Clostridia;o\_\_Lachnospirales;f\_\_Lachnospiraceae;g\_\_Faecalimonas 91 blast;93.40 iPhoP-RF;75.20  
S4\_vs\_VIRSorter\_27316-c 74.11 d\_Bacteria;p\_\_Firmicutes;c\_\_Clostridia;o\_\_Oscillospirales;f\_\_Ruminococcaceae;g\_\_Faecalibacterium 95.4 blast;96.80 iPhoP-RF;75.00 CRISPR;67.80  
S4\_vs\_VIRSorter\_2744-ca 9.58 d\_Bacteria;p\_\_Actinobacteriota;c\_\_Actinomycetia;o\_\_Actinomycetales;f\_\_Bifidobacteriaceae;g\_\_Bifidobacterium 96 CRISPR;97.20 iPhoP-RF;97.10 blast;96.70  
S4\_vs\_VIRSorter\_3006-ca 99.88 d\_Bacteria;p\_\_Firmicutes;c\_\_Clostridia;o\_\_Lachnospirales;f\_\_Lachnospiraceae;g\_\_Mediterraneibacter 91.6 blast;93.90  
S4\_vs\_VIRSorter\_30222-c 65.61 d\_Bacteria;p\_\_Firmicutes;c\_\_Clostridia;o\_\_Oscillospirales;f\_\_Oscillospiraceae;g\_\_Intestinimonas 91.5 blast;93.80  
S4\_vs\_VIRSorter\_31171-c 46.28 d\_Bacteria;p\_\_Firmicutes;c\_\_Clostridia;o\_\_Oscillospirales;f\_\_Ruminococcaceae;g\_\_QAMM01 90.2 blast;92.70 iPhoP-RF;54.90  
S4\_vs\_VIRSorter\_31196-c 93.39 d\_Bacteria;p\_\_Firmicutes;c\_\_Clostridia;o\_\_Oscillospirales;f\_\_Oscillospiraceae;g\_\_Flavonifractor 99.4 CRISPR;97.90 blast;96.20 iPhoP-RF;88.90 RaFAH;87.70  
S4\_vs\_VIRSorter\_31560-c 59.79 d\_Bacteria;p\_\_Firmicutes;c\_\_Clostridia;o\_\_Oscillospirales;f\_\_Oscillospiraceae;g\_\_Flavonifractor 90.3 blast;92.80 iPhoP-RF;86.30 CRISPR;64.80  
S4\_vs\_VIRSorter\_31916-c 39.89 d\_Bacteria;p\_\_Firmicutes;c\_\_Clostridia;o\_\_Lachnospirales;f\_\_Lachnospiraceae;g\_\_Mediterraneibacter 90.7 blast;93.10 iPhoP-RF;68.20  
S4\_vs\_VIRSorter\_31972-c 26.41 d\_Bacteria;p\_\_Firmicutes;c\_\_Clostridia;o\_\_Oscillospirales;f\_\_Ruminococcaceae;g\_\_Ruminococcus\_C 97.3 blast;98.10 CRISPR;93.20 iPhoP-RF;90.50  
S4\_vs\_VIRSorter\_31975-c 88.33 d\_Bacteria;p\_\_Bacteroidota;c\_\_Bacteroidia;o\_\_Bacteroidales;f\_\_Bacteroidaceae;g\_\_Bacteroides 99.6 iPhoP-RF;97.10 blast;96.60 CRISPR;94.50 RaFAH;92.70  
S4\_vs\_VIRSorter\_31975-c 88.33 d\_Bacteria;p\_\_Bacteroidota;c\_\_Bacteroidia;o\_\_Bacteroidales;f\_\_Bacteroidaceae;g\_\_Phocaeicola 95.9 iPhoP-RF;97.10 blast;90.60 CRISPR;74.40  
S4\_vs\_VIRSorter\_31976-c 17.17 d\_Bacteria;p\_\_Firmicutes;c\_\_Clostridia;o\_\_Oscillospirales;f\_\_Ruminococcaceae;g\_\_Gemmiger 97.2 CRISPR;98.00 blast;96.20 iPhoP-RF;93.70  
S4\_vs\_VIRSorter\_31980-c 13.26 d\_Bacteria;p\_\_Proteobacteria;c\_\_Gammaproteobacteria;o\_\_Burkholderiales;f\_\_Burkholderiaceae;g\_\_Duodenibacillus 96.7 blast;97.70 CRISPR;83.90 iPhoP-RF;70.60  
S4\_vs\_VIRSorter\_4746-ca 5.45 d\_Bacteria;p\_\_Firmicutes;c\_\_Clostridia;o\_\_Lachnospirales;f\_\_Lachnospiraceae;g\_\_Roseburia 90.3 iPhoP-RF;92.80  
S4\_vs\_VIRSorter\_4839-ca 69.64 d\_Bacteria;p\_\_Firmicutes;c\_\_Clostridia;o\_\_Oscillospirales;f\_\_Ruminococcaceae;g\_\_Massilimalliae 91.4 blast;93.70 iPhoP-RF;75.70  
S4\_vs\_VIRSorter\_4959-ca 50.34 d\_Bacteria;p\_\_Firmicutes;c\_\_Clostridia;o\_\_Oscillospirales;f\_\_Oscillospiraceae;g\_\_ER4 94.2 blast;95.90 iPhoP-RF;82.50  
S4\_vs\_VIRSorter\_5698-ca 87.05 d\_Bacteria;p\_\_Actinobacteriota;c\_\_Actinomycetia;o\_\_Actinomycetales;f\_\_Bifidobacteriaceae;g\_\_Bifidobacterium 99 CRISPR;98.50 blast;96.80 iPhoP-RF;96.10 RaFAH;71.90  
S4\_vs\_VIRSorter\_6022-cir 97.71 d\_Bacteria;p\_\_Bacteroidota;c\_\_Bacteroidia;o\_\_Bacteroidales;f\_\_Tannerellaceae;g\_\_Marseille-P3160 98.4 CRISPR;98.80 iPhoP-RF;65.30  
S4\_vs\_VIRSorter\_6022-cir 97.71 d\_Bacteria;p\_\_Bacteroidota;c\_\_Bacteroidia;o\_\_Bacteroidales;f\_\_Marinifilaceae;g\_\_Odoribacter 97.3 RaFAH;98.10  
S4\_vs\_VIRSorter\_9913-ca 98.3 d\_Bacteria;p\_\_Bacteroidota;c\_\_Bacteroidia;o\_\_Bacteroidales;f\_\_Marinifilaceae;g\_\_Odoribacter 99.7 CRISPR;97.90 RaFAH;92.60  
S5\_vf\_103206 3.75 d\_Bacteria;p\_\_Firmicutes;c\_\_Clostridia;o\_\_Oscillospirales;f\_\_Oscillospiraceae;g\_\_Lawsonibacter 90 blast;92.50  
S5\_vf\_105728 44.2 d\_Bacteria;p\_\_Firmicutes;c\_\_Clostridia;o\_\_Lachnospirales;f\_\_Lachnospiraceae;g\_\_ 94.5 iPhoP-RF;96.10 blast;93.40  
S5\_vf\_105728 44.2 d\_Bacteria;p\_\_Firmicutes;c\_\_Clostridia;o\_\_Lachnospirales;f\_\_Lachnospiraceae;g\_\_UCS-1-2E3 93.1 iPhoP-RF;95.10 blast;91.90  
S5\_vf\_116300 13.55 d\_Bacteria;p\_\_Firmicutes;c\_\_Clostridia;o\_\_Lachnospirales;f\_\_Lachnospiraceae;g\_\_Anaerostipes 95.2 blast;96.60 iPhoP-RF;90.50 CRISPR;69.90  
S5\_vf\_134040 100 d\_Bacteria;p\_\_Firmicutes;c\_\_Clostridia;o\_\_Oscillospirales;f\_\_Ruminococcaceae;g\_\_Faecalibacterium 100 RaFAH;98.80 blast;96.50 iPhoP-RF;69.10  
S5\_vf\_136076 43.14 d\_Bacteria;p\_\_Firmicutes;c\_\_Clostridia;o\_\_Oscillospirales;f\_\_Oscillospiraceae;g\_\_ER4 93 blast;95.00 iPhoP-RF;69.80  
S5\_vf\_137260 6.74 d\_Bacteria;p\_\_Actinobacteriota;c\_\_Coriobacteriales;o\_\_Coriobacteriales;f\_\_Coriobacteriaceae;g\_\_Collinsella 92.9 CRISPR;94.90  
S5\_vf\_145579 44.59 d\_Bacteria;p\_\_Bacteroidota;c\_\_Bacteroidia;o\_\_Bacteroidales;f\_\_Bacteroidaceae;g\_\_Prevotella 94.6 RaFAH;96.20  
S5\_vf\_145583 10.99 d\_Bacteria;p\_\_Firmicutes;c\_\_Clostridia;o\_\_Clostridiales;f\_\_Clostridiaceae;g\_\_Clostridium 95.2 blast;93.60 iPhoP-RF;80.80 RaFAH;73.30 CRISPR;62.00  
S5\_vf\_145585 9.85 d\_Bacteria;p\_\_Firmicutes;c\_\_Clostridia;o\_\_Lachnospirales;f\_\_Lachnospiraceae;g\_\_Enterocloster 91.2 blast;93.60 iPhoP-RF;91.40 CRISPR;53.80  
S5\_vf\_145588 34.8 d\_Bacteria;p\_\_Firmicutes;c\_\_Clostridia;o\_\_Lachnospirales;f\_\_Lachnospiraceae;g\_\_Dorea\_A 97.2 CRISPR;98.00 iPhoP-RF;64.30  
S5\_vf\_145604 87.41 d\_Bacteria;p\_\_Firmicutes;c\_\_Clostridia;o\_\_Lachnospirales;f\_\_Lachnospiraceae;g\_\_Blautia\_A 99.6 CRISPR;97.30 RaFAH;93.30 blast;92.90 iPhoP-RF;91.80  
S5\_vf\_145604 87.41 d\_Bacteria;p\_\_Firmicutes;c\_\_Clostridia;o\_\_Lachnospirales;f\_\_Lachnospiraceae;g\_\_Blautia 90.9 RaFAH;93.30  
S5\_vf\_18461 99.96 d\_Bacteria;p\_\_Bacteroidota;c\_\_Bacteroidia;o\_\_Bacteroidales;f\_\_Rikenellaceae;g\_\_Alistipes 92.7 RaFAH;92.00 blast;67.20  
S5\_vf\_21869 31.69 d\_Bacteria;p\_\_Firmicutes;c\_\_Clostridia;o\_\_Oscillospirales;f\_\_Oscillospiraceae;g\_\_Flavonifractor 93.1 blast;95.10 iPhoP-RF;73.90  
S5\_vf\_25423 81 d\_Bacteria;p\_\_Firmicutes;c\_\_Bacilli;o\_\_Lactobacillales;f\_\_Streptococcaceae;g\_\_Lactococcus 100 RaFAH;98.80 blast;98.50 iPhoP-RF;91.40  
S5\_vf\_28061 20.02 d\_Bacteria;p\_\_Firmicutes;c\_\_Bacilli;o\_\_Haloplasmatales;f\_\_Turicibacteraceae;g\_\_Turicibacter 91.5 blast;93.80 iPhoP-RF;68.60  
S5\_vf\_29332 12.73 d\_Bacteria;p\_\_Actinobacteriota;c\_\_Coriobacteriales;o\_\_Coriobacteriales;f\_\_Coriobacteriaceae;g\_\_Collinsella 97.3 CRISPR;98.10 blast;94.60 iPhoP-RF;79.50  
S5\_vf\_35687 91.19 d\_Bacteria;p\_\_Firmicutes;c\_\_Bacilli;o\_\_Lactobacillales;f\_\_Streptococcaceae;g\_\_Lactococcus 90.2 RaFAH;92.70  
S5\_vf\_60597 35.7 d\_Bacteria;p\_\_Firmicutes;c\_\_Clostridia;o\_\_Lachnospirales;f\_\_Anaerotiaceae;g\_\_Anaerotignum 93.9 blast;95.70 iPhoP-RF;84.20  
S5\_vf\_6506 20.08 d\_Bacteria;p\_\_Firmicutes;c\_\_Clostridia;o\_\_Clostridiales;f\_\_Clostridiaceae;g\_\_Clostridium\_J 90.3 blast;92.80 iPhoP-RF;70.90  
S5\_vf\_74661 91.73 d\_Bacteria;p\_\_Proteobacteria;c\_\_Gammaproteobacteria;o\_\_Enterobacterales;f\_\_Enterobacteriaceae;g\_\_Escherichia 100 RaFAH;99.40 iPhoP-RF;97.10 blast;96.80 CRISPR;85.00



S5\_vf\_8808 97.29 d\_Bacteria;p\_Firmicutes;c\_Negativicutes;o\_Veillonellales;f\_Veillonellaceae;g\_Veillonella  
S5\_vf\_8808 97.29 d\_Bacteria;p\_Firmicutes;c\_Negativicutes;o\_Veillonellales;f\_Veillonellaceae;g\_F0422  
S5\_vf\_8808 97.29 d\_Bacteria;p\_Firmicutes;c\_Negativicutes;o\_Veillonellales;f\_Veillonellaceae;g\_Veillonella\_A  
S5\_vf\_8965 100 d\_Bacteria;p\_Bacteroidota;c\_Bacteroidia;o\_Bacteroidales;f\_Bacteroidaceae;g\_Bacteroides  
S5\_vf\_8965 100 d\_Bacteria;p\_Bacteroidota;c\_Bacteroidia;o\_Bacteroidales;f\_Bacteroidaceae;g\_Phocaeicola  
S5\_vs\_10428 10.64 d\_Bacteria;p\_Firmicutes;c\_Clostridia;o\_Christensenellales;f\_CAG-74;g\_Alectryocaccamicrobium  
S5\_vs\_107105 21.85 d\_Bacteria;p\_Firmicutes;c\_Clostridia;o\_Oscillospirales;f\_Oscillospiraceae;g\_CAG-110  
S5\_vs\_107105 21.85 d\_Bacteria;p\_Firmicutes;c\_Clostridia;o\_Oscillospirales;f\_Oscillospiraceae;g\_Faecosia  
S5\_vs\_109527 23.09 d\_Bacteria;p\_Bacteroidota;c\_Bacteroidia;o\_Bacteroidales;f\_Bacteroidaceae;g\_Bacteroides  
S5\_vs\_109527 23.09 d\_Bacteria;p\_Bacteroidota;c\_Bacteroidia;o\_Bacteroidales;f\_Bacteroidaceae;g\_Phocaeicola  
S5\_vs\_117319 51.09 d\_Bacteria;p\_Firmicutes;c\_Clostridia;o\_Oscillospirales;f\_Ruminococcaceae;g\_Faecalibacterium  
S5\_vs\_117417 13.57 d\_Bacteria;p\_Firmicutes;c\_Clostridia;o\_Oscillospirales;f\_Oscillospiraceae;g\_Entereneus  
S5\_vs\_118168 30.01 d\_Bacteria;p\_Firmicutes;c\_Clostridia;o\_Oscillospirales;f\_Ruminococcaceae;g\_Anaerotruncus  
S5\_vs\_120079 88.37 d\_Bacteria;p\_Firmicutes;c\_Clostridia;o\_Lachnospirales;f\_Lachnospiraceae;g\_Roseburia  
S5\_vs\_120079 88.37 d\_Bacteria;p\_Firmicutes;c\_Clostridia;o\_Lachnospirales;f\_Lachnospiraceae;g\_VUN101  
S5\_vs\_120584 98.83 d\_Bacteria;p\_Firmicutes;c\_Clostridia;o\_Lachnospirales;f\_Lachnospiraceae;g\_Lachnospira  
S5\_vs\_121411 100 d\_Bacteria;p\_Firmicutes;c\_Clostridia;o\_Oscillospirales;f\_Ruminococcaceae;g\_Ruthenibacterium  
S5\_vs\_122344 26.84 d\_Bacteria;p\_Firmicutes;c\_Clostridia;o\_Lachnospirales;f\_Lachnospiraceae;g\_Roseburia  
S5\_vs\_122344 26.84 d\_Bacteria;p\_Firmicutes;c\_Clostridia;o\_Lachnospirales;f\_Lachnospiraceae;g\_Agathobacter  
S5\_vs\_122618 17.7 d\_Bacteria;p\_Firmicutes;c\_Bacilli;o\_Erysipelotrichales;f\_Erysipelotrichaceae;g\_Clostridium\_AQ  
S5\_vs\_123256 98.81 d\_Bacteria;p\_Bacteroidota;c\_Bacteroidia;o\_Bacteroidales;f\_Rikenellaceae;g\_Alistipes  
S5\_vs\_123256 98.81 d\_Bacteria;p\_Bacteroidota;c\_Bacteroidia;o\_Bacteroidales;f\_Rikenellaceae;g\_Alistipes\_A  
S5\_vs\_124035 7.45 d\_Bacteria;p\_Firmicutes;c\_Clostridia;o\_Oscillospirales;f\_Oscillospiraceae;g\_Intestinimonas  
S5\_vs\_124677 26.54 d\_Bacteria;p\_Firmicutes;c\_Clostridia;o\_Oscillospirales;f\_Ruminococcaceae;g\_Faecalibacterium  
S5\_vs\_128398 22.85 d\_Bacteria;p\_Firmicutes;c\_Clostridia;o\_Oscillospirales;f\_Ruminococcaceae;g\_Negativibacillus  
S5\_vs\_129970 93.93 d\_Bacteria;p\_Bacteroidota;c\_Bacteroidia;o\_Bacteroidales;f\_Bacteroidaceae;g\_Bacteroides  
S5\_vs\_130032 98.82 d\_Bacteria;p\_Proteobacteria;c\_Gammaproteobacteria;o\_Enterobacterales;f\_Enterobacteriaceae;g\_Escherichia  
S5\_vs\_130294 55.97 d\_Bacteria;p\_Firmicutes;c\_Clostridia;o\_Oscillospirales;f\_Ruminococcaceae;g\_Faecalibacterium  
S5\_vs\_130958 18.11 d\_Bacteria;p\_Firmicutes;c\_Clostridia;o\_Oscillospirales;f\_Ruminococcaceae;g\_Anaerotruncus  
S5\_vs\_131510 95 d\_Bacteria;p\_Bacteroidota;c\_Bacteroidia;o\_Bacteroidales;f\_Bacteroidaceae;g\_Bacteroides  
S5\_vs\_13254 8.3 d\_Bacteria;p\_Firmicutes;c\_Clostridia;o\_Oscillospirales;f\_Ruminococcaceae;g\_Ruthenibacterium  
S5\_vs\_1338 100 d\_Bacteria;p\_Bacteroidota;c\_Bacteroidia;o\_Bacteroidales;f\_Rikenellaceae;g\_Alistipes  
S5\_vs\_1338 100 d\_Bacteria;p\_Bacteroidota;c\_Bacteroidia;o\_Bacteroidales;f\_Rikenellaceae;g\_Alistipes\_A  
S5\_vs\_137154 10.76 d\_Bacteria;p\_Firmicutes;c\_Clostridia;o\_Clostridiales;f\_Clostridiaceae;g\_Clostridium  
S5\_vs\_139401 12.88 d\_Bacteria;p\_Firmicutes;c\_Clostridia;o\_Lachnospirales;f\_Lachnospiraceae;g\_Anaerostipes  
S5\_vs\_140946 9.68 d\_Bacteria;p\_Firmicutes;c\_Clostridia;o\_Oscillospirales;f\_Acutalibacteraceae;g\_UMGS856  
S5\_vs\_141621 97.16 d\_Bacteria;p\_Firmicutes;c\_Clostridia;o\_Lachnospirales;f\_Lachnospiraceae;g\_Anaerostipes  
S5\_vs\_142195 100 d\_Bacteria;p\_Bacteroidota;c\_Bacteroidia;o\_Bacteroidales;f\_Bacteroidaceae;g\_Bacteroides  
S5\_vs\_142195 100 d\_Bacteria;p\_Bacteroidota;c\_Bacteroidia;o\_Bacteroidales;f\_Rikenellaceae;g\_Alistipes  
S5\_vs\_145578 39.67 d\_Bacteria;p\_Firmicutes;c\_Clostridia;o\_Lachnospirales;f\_Lachnospiraceae;g\_Enterocloster  
S5\_vs\_145581 9.66 d\_Bacteria;p\_Firmicutes;c\_Clostridia;o\_Christensenellales;f\_Christensenellaceae;g\_Christensenella  
S5\_vs\_145590 39.74 d\_Bacteria;p\_Firmicutes;c\_Clostridia;o\_Lachnospirales;f\_Lachnospiraceae;g\_Clostridium\_AP  
S5\_vs\_145590 39.74 d\_Bacteria;p\_Firmicutes;c\_Clostridia;o\_Lachnospirales;f\_Lachnospiraceae;g\_Lachnoclostridium\_B  
S5\_vs\_145597 20.03 d\_Bacteria;p\_Firmicutes;c\_Clostridia;o\_Christensenellales;f\_NSI-53;g\_NSI-53  
S5\_vs\_145598 95.83 d\_Bacteria;p\_Firmicutes;c\_Clostridia;o\_Lachnospirales;f\_Lachnospiraceae;g\_Roseburia  
S5\_vs\_145598 95.83 d\_Bacteria;p\_Firmicutes;c\_Clostridia;o\_Lachnospirales;f\_Lachnospiraceae;g\_Agathobacter  
S5\_vs\_145602 37.74 d\_Bacteria;p\_Firmicutes;c\_Clostridia;o\_Lachnospirales;f\_Lachnospiraceae;g\_Anaerobutyrium  
S5\_vs\_145605 17.51 d\_Bacteria;p\_Firmicutes;c\_Clostridia;o\_Christensenellales;f\_CAG-74;g\_SFTH01  
S5\_vs\_145611 45.88 d\_Bacteria;p\_Firmicutes;c\_Clostridia;o\_Oscillospirales;f\_Ruminococcaceae;g\_Phocae  
S5\_vs\_1572 97.34 d\_Bacteria;p\_Bacteroidota;c\_Bacteroidia;o\_Bacteroidales;f\_Tannerellaceae;g\_Parabacteroides  
S5\_vs\_17520 39.12 d\_Bacteria;p\_Firmicutes;c\_Clostridia;o\_Lachnospirales;f\_Lachnospiraceae;g\_Hungatella  
S5\_vs\_17520 39.12 d\_Bacteria;p\_Firmicutes;c\_Clostridia;o\_Lachnospirales;f\_Lachnospiraceae;g\_Lacrimispora  
S5\_vs\_20268 22.4 d\_Bacteria;p\_Firmicutes;c\_Clostridia;o\_Oscillospirales;f\_Acutalibacteraceae;g\_Ruminococcus\_E  
S5\_vs\_20500 99.42 d\_Bacteria;p\_Bacteroidota;c\_Bacteroidia;o\_Bacteroidales;f\_Rikenellaceae;g\_Alistipes  
S5\_vs\_21778 11.27 d\_Bacteria;p\_Firmicutes;c\_Clostridia;o\_Oscillospirales;f\_Oscillospiraceae;g\_Flavonifractor  
S5\_vs\_28263 16.17 d\_Bacteria;p\_Firmicutes;c\_Clostridia;o\_Lachnospirales;f\_Lachnospiraceae;g\_Mediterraneibacter  
S5\_vs\_30490 42.23 d\_Bacteria;p\_Firmicutes;c\_Clostridia;o\_Oscillospirales;f\_Ruminococcaceae;g\_Faecalibacterium  
S5\_vs\_32885 19.8 d\_Bacteria;p\_Firmicutes;c\_Clostridia;o\_Oscillospirales;f\_Ruminococcaceae;g\_Anaerotruncus  
S5\_vs\_3501 32.19 d\_Bacteria;p\_Firmicutes;c\_Clostridia;o\_Oscillospirales;f\_Acutalibacteraceae;g\_UBA1691  
S5\_vs\_3501 32.19 d\_Bacteria;p\_Firmicutes;c\_Clostridia;o\_Oscillospirales;f\_Acutalibacteraceae;g\_Fimivincinus  
S5\_vs\_40848 58.74 d\_Bacteria;p\_Firmicutes;c\_Clostridia;o\_Oscillospirales;f\_Acutalibacteraceae;g\_Ruminococcus\_E  
S5\_vs\_43207 30.09 d\_Bacteria;p\_Firmicutes;c\_Clostridia;o\_Oscillospirales;f\_Butyricococcaceae;g\_Agathobaculum  
S5\_vs\_46394 8.87 d\_Bacteria;p\_Firmicutes;c\_Clostridia;o\_Christensenellales;f\_QAND01;g\_UMGS1975  
S5\_vs\_4737 20.64 d\_Bacteria;p\_Firmicutes;c\_Clostridia;o\_Christensenellales;f\_CAG-74;g\_Limiplasma  
S5\_vs\_4737 20.64 d\_Bacteria;p\_Firmicutes;c\_Clostridia;o\_Christensenellales;f\_CAG-74;g\_Firm-11  
S5\_vs\_51416 11.18 d\_Bacteria;p\_Firmicutes;c\_Bacilli;o\_Erysipelotrichales;f\_Erysipelotrichaceae;g\_Holdemania  
S5\_vs\_58766 24.99 d\_Bacteria;p\_Firmicutes;c\_Clostridia;o\_Lachnospirales;f\_Lachnospiraceae;g\_Frisingicoccus  
S5\_vs\_59798 40.34 d\_Bacteria;p\_Firmicutes;c\_Clostridia;o\_Lachnospirales;f\_Lachnospiraceae;g\_Faecalimonas  
S5\_vs\_60507 96.47 d\_Bacteria;p\_Firmicutes;c\_Bacilli;o\_Lactobacillales;f\_Streptococcaceae;g\_Streptococcus  
S5\_vs\_63924 98.89 d\_Bacteria;p\_Actinobacteriota;c\_Actinomycetia;o\_Actinomycetales;f\_Bifidobacteriaceae;g\_Bifidobacterium  
S5\_vs\_6478 66.33 d\_Bacteria;p\_Firmicutes;c\_Bacilli;o\_Lactobacillales;f\_Lactobacillaceae;g\_Lactobacillus  
S5\_vs\_6478 66.33 d\_Bacteria;p\_Firmicutes;c\_Bacilli;o\_Lactobacillales;f\_Lactobacillaceae;g\_Lacticaiseibacillus  
S5\_vs\_6478 66.33 d\_Bacteria;p\_Firmicutes;c\_Bacilli;o\_Lactobacillales;f\_Lactobacillaceae;g\_Ligilactobacillus  
S5\_vs\_6478 66.33 d\_Bacteria;p\_Firmicutes;c\_Bacilli;o\_Lactobacillales;f\_Lactobacillaceae;g\_Limosilactobacillus  
S5\_vs\_65490 3.66 d\_Bacteria;p\_Firmicutes;c\_Clostridia;o\_Oscillospirales;f\_Oscillospiraceae;g\_Flavonifractor  
S5\_vs\_68254 58.14 d\_Bacteria;p\_Firmicutes;c\_Clostridia;o\_Lachnospirales;f\_Lachnospiraceae;g\_Blautia\_A

100 CRISPR;98.80 RaFAH;98.60 blast;93.70 iPhoP-RF;78.30  
98.1 RaFAH;98.60  
98.1 RaFAH;98.60  
100 RaFAH;99.60 iPhoP-RF;97.10 blast;96.30  
95.9 iPhoP-RF;97.10  
91.4 blast;93.70  
94.7 blast;96.30 iPhoP-RF;67.00  
90.8 blast;93.20 iPhoP-RF;64.50  
99 iPhoP-RF;96.40 blast;92.90 RaFAH;89.10  
92.6 iPhoP-RF;94.70 blast;89.10  
98.4 blast;95.50 RaFAH;86.90 CRISPR;78.90 iPhoP-RF;76.80  
90.7 blast;93.10 iPhoP-RF;70.90  
91 blast;93.40 iPhoP-RF;57.30  
95.3 blast;96.70 iPhoP-RF;96.40 CRISPR;84.10  
91 iPhoP-RF;93.40 blast;89.80  
97.5 CRISPR;98.20 blast;93.50 iPhoP-RF;88.90  
95.3 blast;96.70 iPhoP-RF;87.60 CRISPR;68.40  
97.6 CRISPR;98.30 blast;95.70 iPhoP-RF;93.10  
94 CRISPR;95.80 iPhoP-RF;73.90  
95.4 blast;96.80 iPhoP-RF;71.10 CRISPR;66.50  
100 RaFAH;97.10 blast;96.90 iPhoP-RF;96.10  
95.9 RaFAH;97.10  
91.2 blast;93.60 iPhoP-RF;53.30  
97 CRISPR;97.90 blast;96.90 iPhoP-RF;90.80  
93.6 blast;95.50 iPhoP-RF;82.20  
100 RaFAH;99.60 blast;92.90 iPhoP-RF;92.80  
100 RaFAH;99.70 blast;96.90 iPhoP-RF;91.40 CRISPR;72.80  
95.6 blast;96.90 iPhoP-RF;81.60  
94.2 blast;95.90 iPhoP-RF;70.40  
100 RaFAH;97.50 blast;96.90 iPhoP-RF;96.40  
95 blast;96.50 iPhoP-RF;85.40  
100 RaFAH;97.80 blast;97.50 iPhoP-RF;76.10  
99 RaFAH;97.80 blast;81.20  
91.7 blast;94.00 iPhoP-RF;67.30  
90.9 blast;93.30 CRISPR;68.40 iPhoP-RF;67.50  
93.9 blast;95.70 iPhoP-RF;76.80  
96.4 blast;95.60 CRISPR;90.90 iPhoP-RF;88.90 RaFAH;72.10  
99.9 RaFAH;99.80  
95.6 blast;96.90 iPhoP-RF;94.10  
95.2 blast;96.60 iPhoP-RF;76.10 CRISPR;54.30  
90.4 blast;92.90 iPhoP-RF;86.30  
91.4 iPhoP-RF;93.70  
91 iPhoP-RF;93.40 blast;92.10  
94 blast;95.80 iPhoP-RF;60.10  
92.1 blast;94.30 iPhoP-RF;91.80  
91 iPhoP-RF;93.40 blast;91.60 CRISPR;61.60  
90.7 blast;93.10 iPhoP-RF;65.30  
90.3 blast;92.80 iPhoP-RF;68.20  
90.7 blast;93.10 iPhoP-RF;78.00  
91.6 blast;93.90 iPhoP-RF;61.70  
95.9 iPhoP-RF;97.10 CRISPR;88.40  
91.4 iPhoP-RF;93.70  
98.5 CRISPR;98.90 blast;96.50 iPhoP-RF;89.50  
95.6 blast;96.90 iPhoP-RF;96.70  
90.4 blast;92.90 iPhoP-RF;59.20  
91.6 blast;93.90 iPhoP-RF;86.30 CRISPR;58.00  
99.3 blast;97.10 RaFAH;90.30 iPhoP-RF;87.30 CRISPR;71.60  
92.3 blast;94.50 CRISPR;93.00 iPhoP-RF;81.90  
95.6 blast;96.90 iPhoP-RF;90.10 CRISPR;85.90  
94.5 blast;96.10 iPhoP-RF;85.40  
95.6 blast;96.90 iPhoP-RF;92.80  
91.1 blast;93.50 iPhoP-RF;70.60  
90.3 blast;92.80 iPhoP-RF;62.70  
93.9 blast;95.70 iPhoP-RF;68.40  
91.5 blast;93.80 iPhoP-RF;73.00  
90.3 blast;92.80 CRISPR;73.80 iPhoP-RF;66.50  
93.8 blast;95.60 iPhoP-RF;76.60  
91.4 blast;93.70 iPhoP-RF;91.10 CRISPR;78.90  
100 RaFAH;99.70 blast;92.80 iPhoP-RF;91.10 CRISPR;52.30  
99 CRISPR;97.70 iPhoP-RF;96.70 blast;95.40 RaFAH;82.40  
100 RaFAH;99.60 iPhoP-RF;96.70 blast;95.40 CRISPR;68.80  
99.6 RaFAH;99.60  
99.6 RaFAH;99.60  
99.6 RaFAH;99.60  
91.2 blast;93.60 iPhoP-RF;56.20  
93.8 blast;93.80 iPhoP-RF;81.90 RaFAH;64.30

S5\_vs\_69980 76.63 d\_Bacteria;p\_Firmicutes;c\_Clostridia;o\_Oscillospirales;f\_Oscillospiraceae;g\_Flavonifractor  
 S5\_vs\_72532 82.39 d\_Bacteria;p\_Bacteroidota;c\_Bacteroidia;o\_Bacteroidales;f\_Bacteroidaceae;g\_Bacteroides  
 S5\_vs\_74199 13.11 d\_Bacteria;p\_Firmicutes;c\_Clostridia;o\_Oscillospirales;f\_Oscillospiraceae;g\_CAG-83  
 S5\_vs\_76500 80.28 d\_Bacteria;p\_Bacteroidota;c\_Bacteroidia;o\_Bacteroidales;f\_Rikenellaceae;g\_Alistipes  
 S5\_vs\_77593 41.43 d\_Bacteria;p\_Firmicutes;c\_Clostridia;o\_Oscillospirales;f\_Oscillospiraceae;g\_CAG-103  
 S5\_vs\_79992 99.98 d\_Bacteria;p\_Bacteroidota;c\_Bacteroidia;o\_Bacteroidales;f\_Rikenellaceae;g\_Alistipes  
 S5\_vs\_79992 99.98 d\_Bacteria;p\_Bacteroidota;c\_Bacteroidia;o\_Bacteroidales;f\_Rikenellaceae;g\_Alistipes\_A  
 S5\_vs\_80496 99.85 d\_Bacteria;p\_Bacteroidota;c\_Bacteroidia;o\_Bacteroidales;f\_Bacteroidaceae;g\_Bacteroides  
 S5\_vs\_80496 33.04 d\_Bacteria;p\_Firmicutes;c\_Clostridia;o\_Lachnospirales;f\_Lachnospiraceae;g\_Muricomes  
 S5\_vs\_8125 19.38 d\_Bacteria;p\_Firmicutes;c\_Clostridia;o\_Lachnospirales;f\_Lachnospiraceae;g\_Eubacterium\_G  
 S5\_vs\_84574 8.38 d\_Bacteria;p\_Firmicutes;c\_Clostridia;o\_Oscillospirales;f\_Butyricicoccaceae;g\_Agathobaculum  
 S5\_vs\_84946 94.46 d\_Bacteria;p\_Firmicutes;c\_Clostridia;o\_Lachnospirales;f\_Lachnospiraceae;g\_Dorea\_A  
 S5\_vs\_84946 94.46 d\_Bacteria;p\_Firmicutes;c\_Clostridia;o\_Lachnospirales;f\_Lachnospiraceae;g\_Dorea  
 S5\_vs\_850 18.78 d\_Bacteria;p\_Firmicutes;c\_Clostridia;o\_UBA1212;f\_UBA1255;g\_Egeriisoma  
 S5\_vs\_850 18.78 d\_Bacteria;p\_Firmicutes;c\_Clostridia;o\_UBA1212;f\_UBA1255;g\_UMGS1537  
 S5\_vs\_85065 67.47 d\_Bacteria;p\_Firmicutes;c\_Clostridia;o\_Oscillospirales;f\_Ruminococcaceae;g\_Ruthenibacterium  
 S5\_vs\_86562 44.1 d\_Bacteria;p\_Verrucomicrobiota;c\_Verrucomicrobiae;o\_Verrucomicrobiales;f\_Akkermansiaceae;g\_Akkermansia  
 S5\_vs\_89540 26.84 d\_Bacteria;p\_Firmicutes;c\_Bacilli;o\_Lactobacillales;f\_Lactobacillaceae;g\_Limosilactobacillus  
 S5\_vs\_93839 98.83 d\_Bacteria;p\_Bacteroidota;c\_Bacteroidia;o\_Bacteroidales;f\_Rikenellaceae;g\_Alistipes  
 S5\_vs\_93839 98.83 d\_Bacteria;p\_Bacteroidota;c\_Bacteroidia;o\_Bacteroidales;f\_Rikenellaceae;g\_Alistipes\_A  
 S5\_vs\_95307 57.8 d\_Bacteria;p\_Firmicutes;c\_Clostridia;o\_Lachnospirales;f\_Lachnospiraceae;g\_Blaulia  
 S5\_vs\_9747 6.96 d\_Bacteria;p\_Proteobacteria;c\_Alphaproteobacteria;o\_RF32;f\_CAG-239;g\_CAG-267  
 S5\_vs\_97574 99.69 d\_Bacteria;p\_Firmicutes;c\_Clostridia;o\_Lachnospirales;f\_Lachnospiraceae;g\_Blaulia\_A  
 S5\_vs\_97574 99.69 d\_Bacteria;p\_Firmicutes;c\_Clostridia;o\_Lachnospirales;f\_Lachnospiraceae;g\_Blaulia  
 S6\_vf\_25710 89.8 d\_Bacteria;p\_Verrucomicrobiota;c\_Verrucomicrobiae;o\_Verrucomicrobiales;f\_Akkermansiaceae;g\_Akkermansia  
 S6\_vf\_56486 65.79 d\_Bacteria;p\_Bacteroidota;c\_Bacteroidia;o\_Bacteroidales;f\_Bacteroidaceae;g\_Bacteroides  
 S6\_vs\_1146 50.09 d\_Bacteria;p\_Firmicutes;c\_Clostridia;o\_Oscillospirales;f\_Ruminococcaceae;g\_Faecalibacterium  
 S6\_vs\_12945 99.74 d\_Bacteria;p\_Firmicutes;c\_Clostridia;o\_Lachnospirales;f\_Lachnospiraceae;g\_Roseburia  
 S6\_vs\_12945 99.74 d\_Bacteria;p\_Firmicutes;c\_Clostridia;o\_Lachnospirales;f\_Lachnospiraceae;g\_Agathobacter  
 S6\_vs\_12945 99.74 d\_Bacteria;p\_Firmicutes;c\_Clostridia;o\_Lachnospirales;f\_Lachnospiraceae;g\_RUG115  
 S6\_vs\_12945 99.74 d\_Bacteria;p\_Firmicutes;c\_Clostridia;o\_Lachnospirales;f\_Lachnospiraceae;g\_CAG-81  
 S6\_vs\_15390 33.39 d\_Bacteria;p\_Bacteroidota;c\_Bacteroidia;o\_Bacteroidales;f\_Tannerellaceae;g\_Parabacteroides  
 S6\_vs\_15813 90.87 d\_Bacteria;p\_Firmicutes;c\_Clostridia;o\_Oscillospirales;f\_Oscillospiraceae;g\_Flavonifractor  
 S6\_vs\_29152 23.31 d\_Bacteria;p\_Firmicutes;c\_Clostridia;o\_Lachnospirales;f\_Lachnospiraceae;g\_Acetatifactor  
 S6\_vs\_32886 6.93 d\_Bacteria;p\_Bacteroidota;c\_Bacteroidia;o\_Bacteroidales;f\_Rikenellaceae;g\_Alistipes\_A  
 S6\_vs\_33711 86.98 d\_Bacteria;p\_Firmicutes;c\_Clostridia;o\_Oscillospirales;f\_Ruminococcaceae;g\_Ruthenibacterium  
 S6\_vs\_34453 77 d\_Bacteria;p\_Firmicutes;c\_Clostridia;o\_Oscillospirales;f\_Ruminococcaceae;g\_Faecalibacterium  
 S6\_vs\_38250 15.25 d\_Bacteria;p\_Firmicutes;c\_Clostridia;o\_Oscillospirales;f\_Ruminococcaceae;g\_UBA3818  
 S6\_vs\_39025 99.25 d\_Bacteria;p\_Firmicutes;c\_Clostridia;o\_Lachnospirales;f\_Lachnospiraceae;g\_Enterocloster  
 S6\_vs\_39065 83.64 d\_Bacteria;p\_Proteobacteria;c\_Alphaproteobacteria;o\_RF32;f\_CAG-239;g\_CAG-267  
 S6\_vs\_44070 14.4 d\_Bacteria;p\_Proteobacteria;c\_Alphaproteobacteria;o\_RF32;f\_CAG-239;g\_51-20  
 S6\_vs\_46039 24.66 d\_Bacteria;p\_Bacteroidota;c\_Bacteroidia;o\_Bacteroidales;f\_Bacteroidaceae;g\_Bacteroides  
 S6\_vs\_46091 25.96 d\_Bacteria;p\_Firmicutes;c\_Clostridia;o\_Oscillospirales;f\_Ruminococcaceae;g\_Negativibacillus  
 S6\_vs\_53966 51.17 d\_Bacteria;p\_Firmicutes;c\_Clostridia;o\_Oscillospirales;f\_Ruminococcaceae;g\_Faecalibacterium  
 S6\_vs\_54606 99.52 d\_Bacteria;p\_Firmicutes;c\_Clostridia;o\_Lachnospirales;f\_Lachnospiraceae;g\_Blaulia  
 S6\_vs\_54606 99.52 d\_Bacteria;p\_Firmicutes;c\_Clostridia;o\_Lachnospirales;f\_Lachnospiraceae;g\_Ruminococcus\_B  
 S6\_vs\_56485 14.92 d\_Bacteria;p\_Firmicutes;c\_Bacilli;o\_Erysipelotrichales;f\_Erysipelotrichaceae;g\_Holdemania  
 S6\_vs\_56490 26.23 d\_Bacteria;p\_Firmicutes;c\_Clostridia;o\_Oscillospirales;f\_Acutalibacteraceae;g\_UMGS1071  
 S6\_vs\_56491 92.92 d\_Bacteria;p\_Firmicutes;c\_Clostridia;o\_Lachnospirales;f\_Lachnospiraceae;g\_Sellimonas  
 S6\_vs\_56492 27.91 d\_Bacteria;p\_Firmicutes;c\_Clostridia;o\_Oscillospirales;f\_Butyricicoccaceae;g\_Agathobaculum  
 S6\_vs\_56496 61.48 d\_Bacteria;p\_Firmicutes;c\_Clostridia;o\_Lachnospirales;f\_Lachnospiraceae;g\_Marvinbryantia  
 S6\_vs\_56498 78.58 d\_Bacteria;p\_Firmicutes;c\_Clostridia;o\_Lachnospirales;f\_Lachnospiraceae;g\_Muricomes  
 S6\_vs\_9784 91.55 d\_Bacteria;p\_Bacteroidota;c\_Bacteroidia;o\_Bacteroidales;f\_Bacteroidaceae;g\_Bacteroides  
 S6\_vs\_9784 91.55 d\_Bacteria;p\_Bacteroidota;c\_Bacteroidia;o\_Bacteroidales;f\_Bacteroidaceae;g\_Phocaeicola  
 S7\_vf\_114476 27.19 d\_Bacteria;p\_Firmicutes;c\_Clostridia;o\_Lachnospirales;f\_Lachnospiraceae;g\_Anarobutyricum  
 S7\_vf\_117697 98.64 d\_Bacteria;p\_Bacteroidota;c\_Bacteroidia;o\_Bacteroidales;f\_Rikenellaceae;g\_Alistipes  
 S7\_vf\_134023 98.64 d\_Bacteria;p\_Bacteroidota;c\_Bacteroidia;o\_Bacteroidales;f\_Bacteroidaceae;g\_Bacteroides  
 S7\_vf\_13614 12.46 d\_Bacteria;p\_Bacteroidota;c\_Bacteroidia;o\_Bacteroidales;f\_Rikenellaceae;g\_Alistipes\_A  
 S7\_vf\_138019 39.23 d\_Bacteria;p\_Firmicutes;c\_Clostridia;o\_Oscillospirales;f\_Ruminococcaceae;g\_Ruminococcus\_D  
 S7\_vf\_138069 8.23 d\_Bacteria;p\_Firmicutes;c\_Clostridia;o\_Oscillospirales;f\_Oscillospiraceae;g\_Lawsonibacter  
 S7\_vf\_27309 78.93 d\_Bacteria;p\_Firmicutes;c\_Bacilli;o\_Lactobacillales;f\_Streptococcaceae;g\_Streptococcus  
 S7\_vf\_28429 18.88 d\_Bacteria;p\_Bacteroidota;c\_Bacteroidia;o\_Bacteroidales;f\_Bacteroidaceae;g\_Bacteroides  
 S7\_vf\_29941 86.01 d\_Bacteria;p\_Bacteroidota;c\_Bacteroidia;o\_Bacteroidales;f\_Tannerellaceae;g\_Parabacteroides  
 S7\_vf\_37279 79.47 d\_Bacteria;p\_Firmicutes;c\_Bacilli;o\_Lactobacillales;f\_Streptococcaceae;g\_Lactococcus  
 S7\_vf\_37279 64.97 d\_Bacteria;p\_Bacteroidota;c\_Bacteroidia;o\_Bacteroidales;f\_Bacteroidaceae;g\_Bacteroides  
 S7\_vf\_37279 64.97 d\_Bacteria;p\_Bacteroidota;c\_Bacteroidia;o\_Bacteroidales;f\_Bacteroidaceae;g\_Phocaeicola  
 S7\_vf\_37293 98.54 d\_Bacteria;p\_Firmicutes;c\_Bacilli;o\_Lactobacillales;f\_Streptococcaceae;g\_Streptococcus  
 S7\_vf\_37293 98.54 d\_Bacteria;p\_Bacteroidota;c\_Bacteroidia;o\_Bacteroidales;f\_Bacteroidaceae;g\_Prevotella  
 S7\_vf\_38697 61.28 d\_Bacteria;p\_Firmicutes;c\_Bacilli;o\_Erysipelotrichales;f\_Erysipelatoclostridiaceae;g\_Massiliomicrobiota  
 S7\_vf\_39724 99.39 d\_Bacteria;p\_Firmicutes;c\_Clostridia;o\_Oscillospirales;f\_Ruminococcaceae;g\_Faecalibacterium  
 S7\_vf\_49007 85 d\_Bacteria;p\_Firmicutes;c\_Bacilli;o\_Lactobacillales;f\_Streptococcaceae;g\_Streptococcus  
 S7\_vf\_49485 64.81 d\_Bacteria;p\_Firmicutes;c\_Clostridia;o\_Lachnospirales;f\_Lachnospiraceae;g\_Anaerostipes  
 S7\_vf\_5801 93.48 d\_Bacteria;p\_Bacteroidota;c\_Bacteroidia;o\_Bacteroidales;f\_Bacteroidaceae;g\_Bacteroides  
 S7\_vf\_5801 93.48 d\_Bacteria;p\_Bacteroidota;c\_Bacteroidia;o\_Bacteroidales;f\_Bacteroidaceae;g\_Phocaeicola  
 S7\_vf\_5843 19.99 d\_Bacteria;p\_Actinobacteriota;c\_Actinomycetia;o\_Actinomycetales;f\_Bifidobacteriaceae;g\_Bifidobacterium  
 S7\_vf\_60968 71.38 d\_Bacteria;p\_Firmicutes;c\_Clostridia;o\_Lachnospirales;f\_Lachnospiraceae;g\_Ruminococcus\_B

95.3 blast;96.70 iPhoP-RF;96.40 CRISPR;95.20  
 99.4 blast;96.90 iPhoP-RF;96.70 RaFAH;92.20  
 90.4 blast;92.90 iPhoP-RF;92.10  
 99 blast;96.90 iPhoP-RF;94.40 RaFAH;87.40  
 90.6 blast;93.00 iPhoP-RF;71.70  
 100 RaFAH;98.20 blast;97.10 iPhoP-RF;96.70  
 97.5 RaFAH;98.20  
 99.7 blast;96.90 iPhoP-RF;96.10 RaFAH;95.90  
 93.2 blast;95.20 iPhoP-RF;90.50  
 90.6 blast;93.00 iPhoP-RF;53.30  
 91.6 blast;93.90 iPhoP-RF;81.10  
 90.2 blast;92.70 iPhoP-RF;83.60  
 90.1 blast;92.60 iPhoP-RF;75.20  
 92.7 blast;94.80 iPhoP-RF;85.10  
 92.7 blast;94.80 CRISPR;80.00 iPhoP-RF;78.30  
 95.3 blast;96.70  
 100 RaFAH;99.10 CRISPR;98.80 blast;96.90 iPhoP-RF;89.20  
 94.2 blast;93.40 iPhoP-RF;81.90 RaFAH;68.80  
 100 RaFAH;98.90 iPhoP-RF;96.70 blast;95.50  
 98.5 RaFAH;98.90  
 92 blast;91.60 iPhoP-RF;73.20 RaFAH;65.20  
 93 blast;95.00 iPhoP-RF;69.80  
 100 RaFAH;99.30 CRISPR;95.90 blast;93.60 iPhoP-RF;92.10  
 99.1 RaFAH;99.30  
 99.7 CRISPR;97.30 RaFAH;94.60 blast;93.60 iPhoP-RF;72.60  
 99.6 iPhoP-RF;96.10 RaFAH;94.70  
 98.4 blast;96.90 iPhoP-RF;86.00 RaFAH;81.40  
 99.3 RaFAH;94.70 blast;88.50 iPhoP-RF;74.80  
 97.9 RaFAH;94.70 blast;86.00  
 96.4 RaFAH;94.70 blast;76.10  
 90.9 blast;93.30  
 90.8 blast;93.20 iPhoP-RF;92.10  
 99.3 blast;98.10 RaFAH;85.50 iPhoP-RF;85.10 CRISPR;56.80  
 91.2 blast;93.60  
 94.2 blast;95.90 iPhoP-RF;66.30  
 94 blast;95.80 iPhoP-RF;85.40 CRISPR;69.40  
 93.6 blast;95.50 iPhoP-RF;64.30  
 94.3 blast;96.00 iPhoP-RF;76.10  
 91.6 blast;93.90  
 94.6 blast;96.20 iPhoP-RF;75.20  
 94.7 blast;96.30 iPhoP-RF;72.60  
 93 CRISPR;93.00 blast;89.60 iPhoP-RF;82.50 RaFAH;64.10  
 96.6 blast;97.60 iPhoP-RF;83.30 CRISPR;69.80  
 98.7 blast;96.30 iPhoP-RF;90.50 RaFAH;86.50  
 97 RaFAH;91.10 blast;88.40  
 91.2 blast;93.60 iPhoP-RF;61.70  
 94.7 CRISPR;96.30 blast;94.30 iPhoP-RF;79.80  
 95.9 blast;97.10 iPhoP-RF;83.90 CRISPR;68.20  
 97.5 blast;98.20 iPhoP-RF;75.20  
 98.2 blast;98.70 iPhoP-RF;66.80  
 91.2 blast;93.60 iPhoP-RF;65.10  
 91 blast;93.40 iPhoP-RF;69.80  
 100 RaFAH;97.10 iPhoP-RF;96.70 blast;93.90  
 94.9 iPhoP-RF;96.40  
 94.3 blast;96.00 iPhoP-RF;74.30  
 96.9 CRISPR;97.80 iPhoP-RF;97.10 blast;96.80  
 92.6 RaFAH;94.70  
 95 blast;96.50 iPhoP-RF;54.40  
 95.4 blast;96.80 iPhoP-RF;95.40 CRISPR;50.20  
 91.1 blast;93.50 iPhoP-RF;50.40  
 99.6 RaFAH;99.40 iPhoP-RF;67.30  
 96.3 CRISPR;97.40 iPhoP-RF;93.70  
 100 CRISPR;99.00 RaFAH;98.30 iPhoP-RF;94.10 blast;93.90  
 99.4 blast;97.20 RaFAH;91.90 iPhoP-RF;73.90  
 99.7 CRISPR;98.80 iPhoP-RF;97.10 blast;90.80 RaFAH;87.70  
 98.2 CRISPR;98.70 iPhoP-RF;95.10 blast;91.00  
 100 RaFAH;99.60 CRISPR;99.00 iPhoP-RF;54.10  
 90.1 blast;92.60  
 94.2 blast;95.90 iPhoP-RF;74.30  
 99.4 RaFAH;99.50  
 100 CRISPR;98.70 RaFAH;97.80 iPhoP-RF;68.00  
 98.5 CRISPR;98.90 iPhoP-RF;56.20  
 100 RaFAH;96.60 iPhoP-RF;96.40 blast;91.00  
 95 blast;96.50 iPhoP-RF;95.70 CRISPR;71.30  
 96.3 blast;97.40 CRISPR;97.30 iPhoP-RF;93.40  
 97.8 blast;98.40 iPhoP-RF;81.40 CRISPR;66.90

S7\_vf\_63894 77.84 d\_Bacteria;p\_Firmicutes;c\_Bacilli;o\_Lactobacillales;f\_Lactobacillaceae;g\_Leuconostoc  
S7\_vf\_67910 11.86 d\_Bacteria;p\_Actinobacteriota;c\_Coribacteriales;o\_Coribacteriales;f\_Eggerthellaceae;g\_Eggerthella  
S7\_vf\_68239 31.22 d\_Bacteria;p\_Firmicutes;c\_Bacilli;o\_Lactobacillales;f\_Streptococcaceae;g\_Lactococcus  
S7\_vf\_68546 29.45 d\_Bacteria;p\_Firmicutes;c\_Clostridia;o\_Lachnospirales;f\_Lachnospiraceae;g\_Faecalimonas  
S7\_vf\_68546 29.45 d\_Bacteria;p\_Firmicutes;c\_Clostridia;o\_Lachnospirales;f\_Lachnospiraceae;g\_Bariatricus  
S7\_vf\_71527 3.4 d\_Bacteria;p\_Firmicutes;c\_Clostridia;o\_Oscillospirales;f\_Ruminococcaceae;g\_Ruminococcus\_D  
S7\_vf\_72493 13.24 d\_Bacteria;p\_Firmicutes;c\_Clostridia;o\_Lachnospirales;f\_Anaerostigaceae;g\_UMGS1670  
S7\_vf\_76463 42.93 d\_Bacteria;p\_Firmicutes;c\_Clostridia;o\_Oscillospirales;f\_Oscillospiraceae;g\_CAG-103  
S7\_vf\_8332 10.6 d\_Bacteria;p\_Firmicutes;c\_Clostridia;o\_Oscillospirales;f\_Ruminococcaceae;g\_Ruminococcus\_D  
S7\_vf\_84974 91.7 d\_Bacteria;p\_Firmicutes;c\_Clostridia;o\_Oscillospirales;f\_Ruminococcaceae;g\_Faecalibacterium  
S7\_vf\_89197 89.48 d\_Bacteria;p\_Firmicutes;c\_Bacilli;o\_Lactobacillales;f\_Streptococcaceae;g\_Lactococcus  
S7\_vs\_101751 99.91 d\_Bacteria;p\_Firmicutes;c\_Clostridia;o\_Lachnospirales;f\_Lachnospiraceae;g\_Blautia\_A  
S7\_vs\_101751 99.91 d\_Bacteria;p\_Firmicutes;c\_Clostridia;o\_Lachnospirales;f\_Lachnospiraceae;g\_Blautia  
S7\_vs\_103530 35.56 d\_Bacteria;p\_Firmicutes;c\_Clostridia;o\_Oscillospirales;f\_Butyricicoccaceae;g\_Agathobaculum  
S7\_vs\_11081 95.36 d\_Bacteria;p\_Bacteroidota;c\_Bacteroidia;o\_Bacteroidales;f\_Bacteroidaceae;g\_Bacteroides  
S7\_vs\_111831 38.83 d\_Bacteria;p\_Firmicutes;c\_Clostridia;o\_Oscillospirales;f\_Ruminococcaceae;g\_Gemmiger  
S7\_vs\_118295 43.98 d\_Bacteria;p\_Firmicutes;c\_Clostridia;o\_Oscillospirales;f\_Oscillospiraceae;g\_Intestinimonas  
S7\_vs\_118295 43.98 d\_Bacteria;p\_Firmicutes;c\_Clostridia;o\_Oscillospirales;f\_Oscillospiraceae;g\_Flavonifractor  
S7\_vs\_119679 99.98 d\_Bacteria;p\_Bacteroidota;c\_Bacteroidia;o\_Bacteroidales;f\_Rikenellaceae;g\_Alistipes  
S7\_vs\_119679 99.98 d\_Bacteria;p\_Bacteroidota;c\_Bacteroidia;o\_Bacteroidales;f\_Rikenellaceae;g\_Alistipes\_A  
S7\_vs\_129271 12.57 d\_Bacteria;p\_Firmicutes;c\_Clostridia;o\_Oscillospirales;f\_Acutalibacteraceae;g\_UBA1691  
S7\_vs\_129271 12.57 d\_Bacteria;p\_Firmicutes;c\_Clostridia;o\_Oscillospirales;f\_Acutalibacteraceae;g\_Fimivincinus  
S7\_vs\_129858 10.46 d\_Bacteria;p\_Firmicutes;c\_Clostridia;o\_Christensenellales;f\_CAG-74;g\_Firm-11  
S7\_vs\_13041 17.74 d\_Bacteria;p\_Firmicutes;c\_Bacilli;o\_Erysipelotrichales;f\_Erysipelatoclostridiaceae;g\_Erysipelatoclostridium  
S7\_vs\_13370 8.9 d\_Bacteria;p\_Firmicutes;c\_Clostridia;o\_Oscillospirales;f\_Ruminococcaceae;g\_Faecalibacterium  
S7\_vs\_134391 17.86 d\_Bacteria;p\_Firmicutes;c\_Clostridia;o\_Oscillospirales;f\_UMGS1783;g\_UMGS1783  
S7\_vs\_134784 77.29 d\_Bacteria;p\_Firmicutes;c\_Negativicutes;o\_Veillonellales;f\_Dialisteraceae;g\_Dialister  
S7\_vs\_135322 34.72 d\_Bacteria;p\_Firmicutes;c\_Clostridia;o\_Oscillospirales;f\_Ruminococcaceae;g\_Faecalibacterium  
S7\_vs\_135679 23.81 d\_Bacteria;p\_Firmicutes;c\_Clostridia;o\_Lachnospirales;f\_Lachnospiraceae;g\_Blautia\_A  
S7\_vs\_135679 23.81 d\_Bacteria;p\_Firmicutes;c\_Clostridia;o\_Lachnospirales;f\_Lachnospiraceae;g\_Blautia  
S7\_vs\_135828 3.2 d\_Bacteria;p\_Bacteroidota;c\_Bacteroidia;o\_Bacteroidales;f\_Bacteroidaceae;g\_Bacteroides  
S7\_vs\_137611 29.3 d\_Bacteria;p\_Firmicutes;c\_Clostridia;o\_Lachnospirales;f\_Lachnospiraceae;g\_Anaerobutyricum  
S7\_vs\_137915 55.05 d\_Bacteria;p\_Bacteroidota;c\_Bacteroidia;o\_Bacteroidales;f\_Tannerellaceae;g\_Parabacteroides  
S7\_vs\_13799 38.3 d\_Bacteria;p\_Firmicutes;c\_Clostridia;o\_Lachnospirales;f\_Lachnospiraceae;g\_Dorea\_A  
S7\_vs\_137998 42.1 d\_Bacteria;p\_Firmicutes;c\_Clostridia;o\_Lachnospirales;f\_Lachnospiraceae;g\_Blautia\_A  
S7\_vs\_138109 31.21 d\_Bacteria;p\_Firmicutes;c\_Clostridia;o\_Lachnospirales;f\_Lachnospiraceae;g\_Anaerobutyricum  
S7\_vs\_138116 5.66 d\_Bacteria;p\_Firmicutes;c\_Clostridia;o\_Lachnospirales;f\_Lachnospiraceae;g\_Mediterraneibacter  
S7\_vs\_138173 100 d\_Bacteria;p\_Bacteroidota;c\_Bacteroidia;o\_Bacteroidales;f\_Rikenellaceae;g\_Alistipes  
S7\_vs\_138173 100 d\_Bacteria;p\_Bacteroidota;c\_Bacteroidia;o\_Bacteroidales;f\_Rikenellaceae;g\_Alistipes\_A  
S7\_vs\_16344 12.56 d\_Bacteria;p\_Firmicutes;c\_Clostridia;o\_Oscillospirales;f\_Acutalibacteraceae;g\_Ruminococcus\_E  
S7\_vs\_21521 35.28 d\_Bacteria;p\_Firmicutes;c\_Clostridia;o\_Oscillospirales;f\_Ruminococcaceae;g\_Ruminiclostridium\_E  
S7\_vs\_2599 89.5 d\_Bacteria;p\_Bacteroidota;c\_Bacteroidia;o\_Bacteroidales;f\_Bacteroidaceae;g\_Bacteroides  
S7\_vs\_26757 d\_Bacteria;p\_Firmicutes;c\_Clostridia;o\_Oscillospirales;f\_Ruminococcaceae;g\_Faecalibacterium  
S7\_vs\_28150 12.25 d\_Bacteria;p\_Firmicutes;c\_Clostridia;o\_Oscillospirales;f\_Oscillospiraceae;g\_Dysosmobacter  
S7\_vs\_28733 56.54 d\_Bacteria;p\_Firmicutes;c\_Clostridia;o\_Oscillospirales;f\_Acutalibacteraceae;g\_Hydrogeniclostridium  
S7\_vs\_29595 82.91 d\_Bacteria;p\_Verrucomicrobiota;c\_Verrucomicrobiae;o\_Verrucomicrobiales;f\_Akkermansiaceae;g\_Akkermansia  
S7\_vs\_30640 25.04 d\_Bacteria;p\_Firmicutes;c\_Clostridia;o\_Lachnospirales;f\_Lachnospiraceae;g\_Eubacterium\_G  
S7\_vs\_30665 8.94 d\_Bacteria;p\_Firmicutes;c\_Clostridia;o\_Christensenellales;f\_CAG-74;g\_UBA11524  
S7\_vs\_38113 17.89 d\_Bacteria;p\_Firmicutes;c\_Clostridia;o\_Oscillospirales;f\_Acutalibacteraceae;g\_Hydrogeniclostridium  
S7\_vs\_38834 25.72 d\_Bacteria;p\_Firmicutes;c\_Clostridia;o\_Lachnospirales;f\_Lachnospiraceae;g\_RUG115  
S7\_vs\_38834 25.72 d\_Bacteria;p\_Firmicutes;c\_Clostridia;o\_Lachnospirales;f\_Lachnospiraceae;g\_Roseburia  
S7\_vs\_41098 97.6 d\_Bacteria;p\_Firmicutes;c\_Clostridia;o\_Lachnospirales;f\_Lachnospiraceae;g\_Mediterraneibacter  
S7\_vs\_42563 93.91 d\_Bacteria;p\_Firmicutes;c\_Clostridia;o\_Oscillospirales;f\_Ruminococcaceae;g\_Gemmiger  
S7\_vs\_47050 16.97 d\_Bacteria;p\_Firmicutes;c\_Clostridia;o\_Oscillospirales;f\_Acutalibacteraceae;g\_CAG-180  
S7\_vs\_47050 16.97 d\_Bacteria;p\_Firmicutes;c\_Clostridia;o\_Oscillospirales;f\_Acutalibacteraceae;g\_Fimeneus  
S7\_vs\_48523 66.97 d\_Bacteria;p\_Proteobacteria;c\_Gammaproteobacteria;o\_Burkholderiales;f\_Burkholderiaceae;g\_Sutterella  
S7\_vs\_48708 42.25 d\_Bacteria;p\_Firmicutes;c\_Clostridia;o\_Lachnospirales;f\_Lachnospiraceae;g\_Blautia\_A  
S7\_vs\_49426 18.87 d\_Bacteria;p\_Firmicutes;c\_Clostridia;o\_Lachnospirales;f\_Lachnospiraceae;g\_Agathobacter  
S7\_vs\_4956 54.17 d\_Bacteria;p\_Firmicutes;c\_Clostridia;o\_Oscillospirales;f\_Oscillospiraceae;g\_  
S7\_vs\_50194 18.68 d\_Bacteria;p\_Bacteroidota;c\_Bacteroidia;o\_Bacteroidales;f\_Rikenellaceae;g\_Alistipes\_A  
S7\_vs\_50194 18.68 d\_Bacteria;p\_Bacteroidota;c\_Bacteroidia;o\_Bacteroidales;f\_Rikenellaceae;g\_Alistipes  
S7\_vs\_51332 13.21 d\_Bacteria;p\_Bacteroidota;c\_Bacteroidia;o\_Bacteroidales;f\_Coprobacteraceae;g\_Coprobacter  
S7\_vs\_5236 93.85 d\_Bacteria;p\_Firmicutes;c\_Clostridia;o\_Oscillospirales;f\_Oscillospiraceae;g\_CAG-103  
S7\_vs\_54322 65.6 d\_Bacteria;p\_Bacteroidota;c\_Bacteroidia;o\_Bacteroidales;f\_Rikenellaceae;g\_Alistipes  
S7\_vs\_55031 23.56 d\_Bacteria;p\_Bacteroidota;c\_Bacteroidia;o\_Bacteroidales;f\_Tannerellaceae;g\_Parabacteroides  
S7\_vs\_55526 22.37 d\_Bacteria;p\_Actinobacteriota;c\_Coribacteriales;o\_Coribacteriales;f\_Coribacteriaceae;g\_Collinsella  
S7\_vs\_557 66.78 d\_Bacteria;p\_Bacteroidota;c\_Bacteroidia;o\_Bacteroidales;f\_Bacteroidaceae;g\_Bacteroides  
S7\_vs\_557 66.78 d\_Bacteria;p\_Bacteroidota;c\_Bacteroidia;o\_Bacteroidales;f\_Bacteroidaceae;g\_Phocaicola  
S7\_vs\_60775 62.59 d\_Bacteria;p\_Firmicutes;c\_Clostridia;o\_Lachnospirales;f\_Lachnospiraceae;g\_Eubacterium\_F  
S7\_vs\_65719 47.93 d\_Bacteria;p\_Firmicutes;c\_Clostridia;o\_Lachnospirales;f\_Lachnospiraceae;g\_Enterocloster  
S7\_vs\_69630 35.61 d\_Bacteria;p\_Firmicutes;c\_Clostridia;o\_Oscillospirales;f\_Oscillospiraceae;g\_Intestinimonas  
S7\_vs\_72737 3.91 d\_Bacteria;p\_Firmicutes;c\_Clostridia;o\_Oscillospirales;f\_Acutalibacteraceae;g\_Ruminococcus\_E  
S7\_vs\_73280 86.44 d\_Bacteria;p\_Actinobacteriota;c\_Actinomycetia;o\_Actinomycetales;f\_Bifidobacteriaceae;g\_Bifidobacterium  
S7\_vs\_78507 36.34 d\_Bacteria;p\_Firmicutes;c\_Clostridia;o\_Oscillospirales;f\_Oscillospiraceae;g\_Intestinimonas  
S7\_vs\_83100 97.77 d\_Bacteria;p\_Firmicutes;c\_Clostridia;o\_Oscillospirales;f\_Oscillospiraceae;g\_Flavonifractor  
S7\_vs\_83474 31.73 d\_Bacteria;p\_Firmicutes;c\_Clostridia;o\_Oscillospirales;f\_Oscillospiraceae;g\_Flavonifractor

96.2 iPhoP-RF;93.70 RaFAH;78.60  
94.5 blast;96.10  
93.1 RaFAH;95.10  
94.5 CRISPR;96.10 iPhoP-RF;76.10  
94 CRISPR;95.80 iPhoP-RF;84.80  
93.1 iPhoP-RF;95.10 blast;94.30 CRISPR;92.20  
92.5 blast;94.60 iPhoP-RF;65.10  
95.3 CRISPR;96.70  
98.5 CRISPR;98.90 blast;96.20 iPhoP-RF;94.70  
99.9 RaFAH;98.40 blast;92.10 iPhoP-RF;63.30 CRISPR;56.10  
96.6 RaFAH;95.80 iPhoP-RF;71.50  
99.7 RaFAH;94.40 blast;93.60 iPhoP-RF;76.80  
94.5 RaFAH;94.40 iPhoP-RF;64.80  
94.2 blast;95.90 iPhoP-RF;60.30  
100 RaFAH;98.70 iPhoP-RF;94.70 blast;91.00  
97.2 blast;98.00 iPhoP-RF;88.90 CRISPR;82.40  
91.7 blast;94.00 iPhoP-RF;75.40  
91.4 blast;93.70 iPhoP-RF;80.80  
100 blast;98.70 RaFAH;98.60 iPhoP-RF;97.10  
98.1 RaFAH;98.60  
98.5 CRISPR;98.90 blast;97.30 iPhoP-RF;82.80  
93.9 blast;95.70 iPhoP-RF;80.30  
91.4 blast;93.70 iPhoP-RF;85.40 CRISPR;50.00  
94.5 blast;96.10 iPhoP-RF;74.60 CRISPR;54.40  
97 blast;97.90 iPhoP-RF;90.10 CRISPR;77.30  
94.9 blast;96.40 iPhoP-RF;84.80 CRISPR;79.10  
97.3 CRISPR;97.40 blast;96.60 iPhoP-RF;92.80 RaFAH;63.90  
99.7 CRISPR;98.30 blast;91.90 RaFAH;90.70 iPhoP-RF;90.50  
99.6 blast;96.50 RaFAH;94.00 iPhoP-RF;90.10  
91.7 RaFAH;94.00  
93 blast;95.00 iPhoP-RF;86.00  
95 blast;96.50 iPhoP-RF;87.60  
98.1 CRISPR;98.30 blast;90.90 iPhoP-RF;85.40 RaFAH;59.50  
93 blast;95.00 iPhoP-RF;94.70 CRISPR;72.50  
93.4 blast;95.30 iPhoP-RF;78.00  
91 blast;93.40 iPhoP-RF;75.90  
91.5 blast;93.80 iPhoP-RF;89.50  
100 RaFAH;98.50 blast;94.70 iPhoP-RF;74.10  
97.9 RaFAH;98.50  
98.8 CRISPR;99.10 blast;96.90 iPhoP-RF;95.70  
90 blast;92.50 iPhoP-RF;74.80  
100 RaFAH;99.30 iPhoP-RF;94.40 blast;93.90  
94.6 blast;96.20 iPhoP-RF;85.10  
94.2 blast;95.90 iPhoP-RF;74.10  
95.2 blast;96.60 iPhoP-RF;62.20  
99.4 CRISPR;99.50 iPhoP-RF;57.30  
94.3 blast;96.00 iPhoP-RF;75.20  
93.8 CRISPR;95.60 blast;92.80 iPhoP-RF;92.40  
91.7 blast;94.00 iPhoP-RF;64.50  
91.5 blast;93.80  
90.1 blast;92.60 iPhoP-RF;69.50  
95.4 blast;96.80  
96.3 blast;96.80 iPhoP-RF;75.40 RaFAH;59.00  
98.7 CRISPR;99.00 blast;96.60 iPhoP-RF;92.40  
97.5 blast;98.20 iPhoP-RF;92.10  
91.6 blast;93.90  
90.9 blast;93.30 iPhoP-RF;69.50  
91.5 blast;93.80 iPhoP-RF;71.30  
91.6 blast;93.90 iPhoP-RF;83.30  
96.9 blast;90.90 RaFAH;87.90 iPhoP-RF;85.70  
96.6 blast;89.90 RaFAH;87.90  
94.5 blast;96.10 iPhoP-RF;53.30  
93.5 CRISPR;95.40  
98.7 blast;96.80 CRISPR;95.60 iPhoP-RF;87.30 RaFAH;84.00  
98.1 blast;98.60 CRISPR;97.70 iPhoP-RF;89.20  
98.7 CRISPR;99.00 blast;93.80 iPhoP-RF;84.50  
99.3 iPhoP-RF;97.10 blast;93.70 RaFAH;89.50  
94.9 iPhoP-RF;96.40 blast;82.80  
91.6 blast;93.90  
95.7 CRISPR;97.00 blast;94.90 iPhoP-RF;88.90  
94.7 blast;96.30 iPhoP-RF;65.10  
97.9 blast;98.50 iPhoP-RF;96.40  
99.1 CRISPR;99.30 iPhoP-RF;97.10 blast;96.90  
90.8 blast;93.20 iPhoP-RF;70.90  
97.8 blast;98.40 iPhoP-RF;85.10 CRISPR;74.00  
93.9 blast;95.70 iPhoP-RF;90.80

S7\_vs\_86377 91.04 d\_Bacteria;p\_Firmicutes;c\_Clostridia;o\_Lachnospirales;f\_Lachnospiraceae;g\_Bariatricos 92 blast;94.20 iPhoP-RF;79.50  
 S7\_vs\_86377 91.04 d\_Bacteria;p\_Firmicutes;c\_Clostridia;o\_Lachnospirales;f\_Lachnospiraceae;g\_Lachnoclostridium\_B 91.2 blast;93.60 iPhoP-RF;74.80  
 S7\_vs\_87279 66.77 d\_Bacteria;p\_Firmicutes;c\_Clostridia;o\_Oscillospirales;f\_Ruminococcaceae;g\_Faecalibacterium 95.2 blast;96.60 iPhoP-RF;62.50  
 S7\_vs\_87439 31.68 d\_Bacteria;p\_Verrucomicrobiota;c\_Lentisphaeria;o\_Victivallaeae;f\_Victivallaceae;g\_Victivallis 90.2 blast;92.70 iPhoP-RF;71.10  
 S7\_vs\_944 66.43 d\_Bacteria;p\_Bacteroidota;c\_Bacteroidia;o\_Bacteroidales;f\_Bacteroidaceae;g\_Bacteroides 100 RaFAH;98.90 iPhoP-RF;96.70 blast;91.80  
 S7\_vs\_94738 58.62 d\_Bacteria;p\_Firmicutes;c\_Clostridia;o\_Oscillospirales;f\_Oscillospiraceae;g\_Flavinifractor 91.2 blast;93.60 iPhoP-RF;71.30  
 S7\_vs\_97737 56.07 d\_Bacteria;p\_Firmicutes;c\_Clostridia;o\_Oscillospirales;f\_Ruminococcaceae;g\_Faecalibacterium 95.6 blast;96.90 iPhoP-RF;91.80  
 S8\_vs\_101283 99.72 d\_Bacteria;p\_Firmicutes;c\_Clostridia;o\_Oscillospirales;f\_Ruminococcaceae;g\_Faecalibacterium 100 RaFAH;99.60 CRISPR;98.20 blast;95.50 iPhoP-RF;84.80  
 S8\_vs\_102058 92.39 d\_Bacteria;p\_Actinobacteriota;c\_Actinomycetia;o\_Actinomycetales;f\_Micrococcaceae;g\_Rothia 100 RaFAH;99.40 CRISPR;98.40 iPhoP-RF;80.80  
 S8\_vs\_111790 20.45 d\_Bacteria;p\_Firmicutes;c\_Clostridia;o\_Oscillospirales;f\_Oscillospiraceae;g\_Flavinifractor 91.6 blast;93.90 iPhoP-RF;81.10  
 S8\_vs\_117796 71.62 d\_Bacteria;p\_Bacteroidota;c\_Bacteroidia;o\_Bacteroidales;f\_Bacteroidaceae;g\_Prevotella 91.1 blast;93.50 iPhoP-RF;88.50  
 S8\_vs\_117796 71.62 d\_Bacteria;p\_Bacteroidota;c\_Bacteroidia;o\_Bacteroidales;f\_Bacteroidaceae;g\_Bacteroides 90.9 RaFAH;93.30  
 S8\_vs\_122206 16.65 d\_Bacteria;p\_Bacteroidota;c\_Bacteroidia;o\_Bacteroidales;f\_Bacteroidaceae;g\_Prevotella 94.7 blast;96.30 iPhoP-RF;90.50  
 S8\_vs\_129423 27.49 d\_Bacteria;p\_Firmicutes;c\_Bacilli;o\_Lactobacillales;f\_Lactobacillaceae;g\_Leuconostoc 97.5 iPhoP-RF;93.70 RaFAH;86.10  
 S8\_vs\_131009 84.39 d\_Bacteria;p\_Firmicutes;c\_Clostridia;o\_Lachnospirales;f\_Lachnospiraceae;g\_Eubacterium\_F 97.2 CRISPR;98.00 blast;96.80 iPhoP-RF;95.40  
 S8\_vs\_132697 84.84 d\_Bacteria;p\_Firmicutes;c\_Clostridia;o\_Lachnospirales;f\_Lachnospiraceae;g\_Agathobacter 99.9 CRISPR;98.90 RaFAH;92.10 blast;90.20 iPhoP-RF;86.30  
 S8\_vs\_132697 84.84 d\_Bacteria;p\_Firmicutes;c\_Clostridia;o\_Lachnospirales;f\_Lachnospiraceae;g\_Roseburia 99.3 RaFAH;92.10 blast;87.10 iPhoP-RF;85.70  
 S8\_vs\_132697 84.84 d\_Bacteria;p\_Firmicutes;c\_Clostridia;o\_Lachnospirales;f\_Lachnospiraceae;g\_Lachnospira 98.7 CRISPR;99.00 blast;78.00  
 S8\_vs\_132697 84.84 d\_Bacteria;p\_Firmicutes;c\_Clostridia;o\_Lachnospirales;f\_Lachnospiraceae;g\_RUG115 96.6 RaFAH;92.10 blast;85.00  
 S8\_vs\_134943 81.72 d\_Bacteria;p\_Firmicutes;c\_Bacilli;o\_Lactobacillales;f\_Streptococcaceae;g\_Streptococcus 99.7 RaFAH;99.40 iPhoP-RF;72.60  
 S8\_vs\_13709 11.95 d\_Bacteria;p\_Firmicutes;c\_Clostridia;o\_TANB77;f\_CAG-508;g\_CAG-354 90.2 blast;92.70 iPhoP-RF;70.60  
 S8\_vs\_13758 11.78 d\_Bacteria;p\_Firmicutes;c\_Clostridia;o\_TANB77;f\_CAG-508;g\_CAG-354 93.9 blast;95.70 iPhoP-RF;71.70  
 S8\_vs\_142700 5.82 d\_Bacteria;p\_Actinobacteriota;c\_Coribacteriia;o\_Coribacteriales;f\_Coribacteriaceae;g\_Collinsella 99.4 CRISPR;99.50 iPhoP-RF;93.40 blast;91.90  
 S8\_vs\_151384 47.18 d\_Bacteria;p\_Firmicutes;c\_Clostridia;o\_Oscillospirales;f\_Ruminococcaceae;g\_Gemmiger 96.3 CRISPR;97.40 blast;92.00 iPhoP-RF;89.80  
 S8\_vs\_153696 11.92 d\_Bacteria;p\_Actinobacteriota;c\_Actinomycetia;o\_Actinomycetales;f\_Bifidobacteriaceae;g\_Bifidobacterium 91.2 blast;93.60  
 S8\_vs\_158225 14.69 d\_Bacteria;p\_Bacteroidota;c\_Bacteroidia;o\_Bacteroidales;f\_Tannerellaceae;g\_Parabacteroides 94.7 blast;96.80  
 S8\_vs\_161703 49.06 d\_Bacteria;p\_Firmicutes;c\_Clostridia;o\_Oscillospirales;f\_Ruminococcaceae;g\_Ruminococcus\_D 99.1 CRISPR;97.90 blast;96.80 iPhoP-RF;96.40 RaFAH;83.30  
 S8\_vs\_16172 45.4 d\_Bacteria;p\_Bacteroidota;c\_Bacteroidia;o\_Bacteroidales;f\_Tannerellaceae;g\_Parabacteroides 95.9 iPhoP-RF;97.10 blast;96.90 CRISPR;92.40  
 S8\_vs\_16172 45.4 d\_Bacteria;p\_Bacteroidota;c\_Bacteroidia;o\_Bacteroidales;f\_Bacteroidaceae;g\_Bacteroides 94.9 RaFAH;96.40  
 S8\_vs\_166403 69.48 d\_Bacteria;p\_Firmicutes;c\_Clostridia;o\_Oscillospirales;f\_Oscillospiraceae;g\_Flavinifractor 95.2 blast;96.60 iPhoP-RF;72.20  
 S8\_vs\_166677 20.94 d\_Bacteria;p\_Bacteroidota;c\_Bacteroidia;o\_Bacteroidales;f\_Bacteroidaceae;g\_Prevotella 99.9 blast;98.70 CRISPR;96.60 iPhoP-RF;93.10 RaFAH;90.50  
 S8\_vs\_170878 39.36 d\_Bacteria;p\_Firmicutes;c\_Clostridia;o\_Oscillospirales;f\_Oscillospiraceae;g\_CAG-83 91.2 blast;93.60 iPhoP-RF;65.00  
 S8\_vs\_183045 35.16 d\_Bacteria;p\_Bacteroidota;c\_Bacteroidia;o\_Bacteroidales;f\_Bacteroidaceae;g\_Prevotella 98.5 CRISPR;98.90 blast;93.00 iPhoP-RF;90.50  
 S8\_vs\_187742 91.82 d\_Bacteria;p\_Firmicutes;c\_Clostridia;o\_Oscillospirales;f\_Ruminococcaceae;g\_Faecalibacterium 99.6 blast;96.20 RaFAH;95.10 CRISPR;86.20 iPhoP-RF;65.30  
 S8\_vs\_187742 91.82 d\_Bacteria;p\_Firmicutes;c\_Bacilli;o\_Lactobacillales;f\_Streptococcaceae;g\_Streptococcus 94.6 blast;96.20  
 S8\_vs\_195032 5.64 d\_Bacteria;p\_Actinobacteriota;c\_Coribacteriia;o\_Coribacteriales;f\_Eggerthellaceae;g\_Gordonibacter 94.9 CRISPR;96.40 iPhoP-RF;75.70  
 S8\_vs\_195032 5.64 d\_Bacteria;p\_Actinobacteriota;c\_Coribacteriia;o\_Coribacteriales;f\_Eggerthellaceae;g\_Eggerthella 91.6 blast;93.90 iPhoP-RF;69.30  
 S8\_vs\_197061 60.03 d\_Bacteria;p\_Actinobacteriota;c\_Actinomycetia;o\_Actinomycetales;f\_Bifidobacteriaceae;g\_Bifidobacterium 98.8 CRISPR;99.00 iPhoP-RF;97.10 blast;96.80 RaFAH;52.60  
 S8\_vs\_201695 30.61 d\_Bacteria;p\_Firmicutes;c\_Clostridia;o\_Lachnospirales;f\_Anaerotruncaceae;g\_Anaerotruncum 94.2 blast;95.90 iPhoP-RF;76.40  
 S8\_vs\_208110 79.16 d\_Bacteria;p\_Firmicutes;c\_Clostridia;o\_Oscillospirales;f\_Oscillospiraceae;g\_Intestinimonas 92 blast;94.20 iPhoP-RF;50.20  
 S8\_vs\_208111 81.6 d\_Bacteria;p\_Desulfobacteriota;c\_Desulfobacteriales;f\_Desulfobacteriaceae;g\_Bilophila 90.8 CRISPR;93.20 iPhoP-RF;60.30  
 S8\_vs\_208115 d\_Bacteria;p\_Bacteroidota;c\_Bacteroidia;o\_Bacteroidales;f\_Barnesiellaceae;g\_Barnesiella 94.2 blast;95.90 iPhoP-RF;72.80  
 S8\_vs\_208119 18.24 d\_Bacteria;p\_Firmicutes;c\_Clostridia;o\_Oscillospirales;f\_Ruminococcaceae;g\_Faecalibacterium 97.2 CRISPR;97.90 RaFAH;52.10  
 S8\_vs\_208120 99.62 d\_Bacteria;p\_Bacteroidota;c\_Bacteroidia;o\_Bacteroidales;f\_Bacteroidaceae;g\_Bacteroides 98.2 RaFAH;93.90 blast;88.30 iPhoP-RF;53.80  
 S8\_vs\_208120 99.62 d\_Bacteria;p\_Bacteroidota;c\_Bacteroidia;o\_Bacteroidales;f\_Tannerellaceae;g\_Parabacteroides 91.6 blast;96.80 iPhoP-RF;57.90  
 S8\_vs\_208126 48.51 d\_Bacteria;p\_Firmicutes;c\_Clostridia;o\_Oscillospirales;f\_Ruminococcaceae;g\_Gemmiger 95.4 blast;93.90 iPhoP-RF;60.90  
 S8\_vs\_208146 25.58 d\_Bacteria;p\_Firmicutes;c\_Negativicutes;o\_Acidaminococcales;f\_Acidaminococcaceae;g\_Phascolartobacterium 93.1 CRISPR;95.10  
 S8\_vs\_28956 91.89 d\_Bacteria;p\_Bacteroidota;c\_Bacteroidia;o\_Bacteroidales;f\_Bacteroidaceae;g\_Bacteroides 99.6 iPhoP-RF;96.40 RaFAH;94.20 blast;93.80  
 S8\_vs\_28956 91.89 d\_Bacteria;p\_Bacteroidota;c\_Bacteroidia;o\_Bacteroidales;f\_Bacteroidaceae;g\_Phocaeicola 94.9 iPhoP-RF;96.40 blast;92.70  
 S8\_vs\_45776 88.6 d\_Bacteria;p\_Firmicutes;c\_Bacilli;o\_Lactobacillales;f\_Streptococcaceae;g\_Lactococcus 100 RaFAH;99.20 blast;98.30 iPhoP-RF;73.90  
 S8\_vs\_55476 64.72 d\_Bacteria;p\_Firmicutes;c\_Clostridia;o\_Oscillospirales;f\_Oscillospiraceae;g\_Intestinimonas 91.6 blast;93.90 iPhoP-RF;82.20

S8\_vs\_206526 81.78 d\_Bacteria;p\_Firmicutes;c\_Clostridia;o\_Lachnospirales;f\_Lachnospiraceae;g\_Lachnospira  
S8\_vs\_208114 9.13 d\_Bacteria;p\_Desulfobacterota;c\_Desulfovibrionia;o\_Desulfovibrionales;f\_Desulfovibrionaceae;g\_Mailhella  
S8\_vs\_28311 99.02 d\_Bacteria;p\_Bacteroidota;c\_Bacteroidia;o\_Bacteroidales;f\_Bacteroidaceae;g\_Bacteroides  
S8\_vs\_40014 80.96 d\_Bacteria;p\_Bacteroidota;c\_Bacteroidia;o\_Bacteroidales;f\_Rikenellaceae;g\_Alistipes  
S8\_vs\_4153 5.07 d\_Bacteria;p\_Bacteroidota;c\_Bacteroidia;o\_Bacteroidales;f\_Barnesiellaceae;g\_Barnesiella  
S8\_vs\_50431 20.17 d\_Bacteria;p\_Firmicutes;c\_Clostridia;o\_Oscillospirales;f\_Oscillospiraceae;g\_Dysosmobacter  
S8\_vs\_51368 31.95 d\_Bacteria;p\_Firmicutes;c\_Clostridia;o\_Oscillospirales;f\_Oscillospiraceae;g\_CAG-170  
S8\_vs\_5211 70.75 d\_Bacteria;p\_Firmicutes;c\_Clostridia;o\_Lachnospirales;f\_Lachnospiraceae;g\_Massilistercora  
S8\_vs\_54183 20.38 d\_Bacteria;p\_Firmicutes;c\_Clostridia;o\_Oscillospirales;f\_Oscillospiraceae;g\_CAG-170  
S8\_vs\_59736 26.65 d\_Bacteria;p\_Firmicutes;c\_Bacilli;o\_Erysipelotrichales;f\_Erysipelatoclostridiaceae;g\_Catenibacterium  
S8\_vs\_63277 75.64 d\_Bacteria;p\_Firmicutes;c\_Clostridia;o\_Oscillospirales;f\_Ruminococcaceae;g\_Faecalibacterium  
S8\_vs\_72117 19.43 d\_Bacteria;p\_Bacteroidota;c\_Bacteroidia;o\_Bacteroidales;f\_Bacteroidaceae;g\_Bacteroides  
S8\_vs\_9114 28.26 d\_Bacteria;p\_Bacteroidota;c\_Bacteroidia;o\_Bacteroidales;f\_Rikenellaceae;g\_Alistipes\_A  
S8\_vs\_99362 99.97 d\_Bacteria;p\_Bacteroidota;c\_Bacteroidia;o\_Bacteroidales;f\_Bacteroidaceae;g\_Bacteroides  
S8\_vs\_99362 99.97 d\_Bacteria;p\_Bacteroidota;c\_Bacteroidia;o\_Bacteroidales;f\_Bacteroidaceae;g\_Paraprevotella  
S8\_vs\_9987 99.87 d\_Bacteria;p\_Bacteroidota;c\_Bacteroidia;o\_Bacteroidales;f\_Rikenellaceae;g\_Alistipes  
S8\_vs\_9987 99.87 d\_Bacteria;p\_Bacteroidota;c\_Bacteroidia;o\_Bacteroidales;f\_Rikenellaceae;g\_Alistipes  
S9\_vf\_13507 66.3 d\_Bacteria;p\_Bacteroidota;c\_Bacteroidia;o\_Bacteroidales;f\_Bacteroidaceae;g\_Prevotella  
S9\_vf\_15012 97.67 d\_Bacteria;p\_Firmicutes;c\_Bacilli;o\_Lactobacillales;f\_Streptococcaceae;g\_Streptococcus  
S9\_vf\_19284 15.56 d\_Bacteria;p\_Firmicutes;c\_Bacilli;o\_Lactobacillales;f\_Streptococcaceae;g\_Streptococcus  
S9\_vf\_4115 96.62 d\_Bacteria;p\_Firmicutes;c\_Bacilli;o\_Lactobacillales;f\_Streptococcaceae;g\_Streptococcus  
S9\_vf\_51656 29.36 d\_Bacteria;p\_Bacteroidota;c\_Bacteroidia;o\_Bacteroidales;f\_Bacteroidaceae;g\_Prevotella  
S9\_vf\_64844 89.68 d\_Bacteria;p\_Firmicutes;c\_Clostridia;o\_Oscillospirales;f\_Oscillospiraceae;g\_CAG-83  
S9\_vf\_64844 89.68 d\_Bacteria;p\_Firmicutes;c\_Clostridia;o\_Oscillospirales;f\_Oscillospiraceae;g\_Dysosmobacter  
S9\_vf\_73311 18.82 d\_Bacteria;p\_Firmicutes;c\_Clostridia;o\_Lachnospirales;f\_CAG-274;g\_CAG-274  
S9\_vf\_76769 53.32 d\_Bacteria;p\_Bacteroidota;c\_Bacteroidia;o\_Bacteroidales;f\_Bacteroidaceae;g\_Prevotella  
S9\_vf\_90856 94.47 d\_Bacteria;p\_Firmicutes;c\_Bacilli;o\_Lactobacillales;f\_Streptococcaceae;g\_Streptococcus  
S9\_vf\_90866 15.47 d\_Bacteria;p\_Firmicutes;c\_Bacilli;o\_Lactobacillales;f\_Streptococcaceae;g\_Streptococcus  
S9\_vf\_934 17.76 d\_Bacteria;p\_Actinobacteriota;c\_Actinomycetia;o\_Mycobacteriales;f\_Mycobacteriaceae;g\_Mycobacterium  
S9\_vs\_14235 12.73 d\_Bacteria;p\_Firmicutes;c\_Clostridia;o\_Oscillospirales;f\_Oscillospiraceae;g\_An92  
S9\_vs\_14235 12.73 d\_Bacteria;p\_Firmicutes;c\_Clostridia;o\_Oscillospirales;f\_Oscillospiraceae;g\_Flavonifractor  
S9\_vs\_1966 61.19 d\_Bacteria;p\_Firmicutes;c\_Clostridia;o\_Lachnospirales;f\_Lachnospiraceae;g\_Bariatricus  
S9\_vs\_19689 9.42 d\_Bacteria;p\_Firmicutes;c\_Clostridia;o\_Oscillospirales;f\_Butyricicoccaceae;g\_Agathobaculum  
S9\_vs\_21850 63.18 d\_Bacteria;p\_Bacteroidota;c\_Bacteroidia;o\_Bacteroidales;f\_Barnesiellaceae;g\_Barnesiella  
S9\_vs\_26179 48.62 d\_Bacteria;p\_Firmicutes;c\_Clostridia;o\_Oscillospirales;f\_Acutalibacteraceae;g\_UMGS1071  
S9\_vs\_2799 10.92 d\_Bacteria;p\_Bacteroidota;c\_Bacteroidia;o\_Bacteroidales;f\_Rikenellaceae;g\_Alistipes  
S9\_vs\_28197 87.18 d\_Bacteria;p\_Bacteroidota;c\_Bacteroidia;o\_Bacteroidales;f\_Bacteroidaceae;g\_Bacteroides  
S9\_vs\_28197 87.18 d\_Bacteria;p\_Bacteroidota;c\_Bacteroidia;o\_Bacteroidales;f\_Bacteroidaceae;g\_Phocaeicola  
S9\_vs\_32588 67.17 d\_Bacteria;p\_Firmicutes;c\_Clostridia;o\_Lachnospirales;f\_Lachnospiraceae;g\_Dorea  
S9\_vs\_32588 67.17 d\_Bacteria;p\_Firmicutes;c\_Clostridia;o\_Lachnospirales;f\_Lachnospiraceae;g\_Dorea\_A  
S9\_vs\_32588 67.17 d\_Bacteria;p\_Firmicutes;c\_Clostridia;o\_Oscillospirales;f\_Oscillospiraceae;g\_Intestinimonas  
S9\_vs\_34898 91.82 d\_Bacteria;p\_Firmicutes;c\_Clostridia;o\_Lachnospirales;f\_Lachnospiraceae;g\_Sellimonas  
S9\_vs\_37437 14.86 d\_Bacteria;p\_Firmicutes;c\_Bacilli;o\_Erysipelotrichales;f\_Erysipelotrichaceae;g\_Holdemania  
S9\_vs\_41371 44.35 d\_Bacteria;p\_Firmicutes;c\_Clostridia;o\_Lachnospirales;f\_Lachnospiraceae;g\_Enterocloster  
S9\_vs\_4343 24.4 d\_Bacteria;p\_Firmicutes;c\_Clostridia;o\_Lachnospirales;f\_Lachnospiraceae;g\_Enterocloster  
S9\_vs\_44331 98.52 d\_Bacteria;p\_Firmicutes;c\_Clostridia;o\_Lachnospirales;f\_Lachnospiraceae;g\_Ruminococcus\_B  
S9\_vs\_4558 65.18 d\_Bacteria;p\_Firmicutes;c\_Clostridia;o\_Oscillospirales;f\_Oscillospiraceae;g\_Flavonifractor  
S9\_vs\_46498 26.43 d\_Bacteria;p\_Firmicutes;c\_Bacilli;o\_Erysipelotrichales;f\_Erysipelatoclostridiaceae;g\_Erysipelatoclostridium  
S9\_vs\_48240 63.98 d\_Bacteria;p\_Firmicutes;c\_Clostridia;o\_Lachnospirales;f\_Lachnospiraceae;g\_Hungatella  
S9\_vs\_48347 25.89 d\_Bacteria;p\_Firmicutes;c\_Clostridia;o\_Oscillospirales;f\_Ruminococcaceae;g\_Negativibacillus  
S9\_vs\_48424 86.27 d\_Bacteria;p\_Bacteroidota;c\_Bacteroidia;o\_Bacteroidales;f\_Rikenellaceae;g\_Alistipes  
S9\_vs\_50439 93.5 d\_Bacteria;p\_Firmicutes;c\_Clostridia;o\_Oscillospirales;f\_Oscillospiraceae;g\_Flavonifractor  
S9\_vs\_55738 76 d\_Bacteria;p\_Firmicutes;c\_Clostridia;o\_Lachnospirales;f\_Lachnospiraceae;g\_Enterocloster  
S9\_vs\_5676 19.1 d\_Bacteria;p\_Firmicutes;c\_Clostridia;o\_Oscillospirales;f\_Oscillospiraceae;g\_Intestinimonas  
S9\_vs\_58086 53.1 d\_Bacteria;p\_Firmicutes;c\_Clostridia;o\_Lachnospirales;f\_Lachnospiraceae;g\_Dorea\_A  
S9\_vs\_58086 53.1 d\_Bacteria;p\_Firmicutes;c\_Clostridia;o\_Lachnospirales;f\_Lachnospiraceae;g\_Dorea  
S9\_vs\_62803 39.71 d\_Bacteria;p\_Firmicutes;c\_Clostridia;o\_Lachnospirales;f\_Lachnospiraceae;g\_Sellimonas  
S9\_vs\_62803 39.71 d\_Bacteria;p\_Firmicutes;c\_Clostridia;o\_Lachnospirales;f\_Lachnospiraceae;g\_Lachnospirillum\_B  
S9\_vs\_66877 29.56 d\_Bacteria;p\_Firmicutes;c\_Clostridia;o\_Oscillospirales;f\_Ruminococcaceae;g\_Ruthenibacterium  
S9\_vs\_67792 30.5 d\_Bacteria;p\_Firmicutes;c\_Negativicutes;o\_Veillonellales;f\_Dialisteraceae;g\_Dialister  
S9\_vs\_69322 20.79 d\_Bacteria;p\_Firmicutes;c\_Clostridia;o\_Oscillospirales;f\_Oscillospiraceae;g\_Dysosmobacter  
S9\_vs\_75050 26.71 d\_Bacteria;p\_Firmicutes;c\_Clostridia;o\_Lachnospirales;f\_Lachnospiraceae;g\_CAG-127  
S9\_vs\_83108 82.91 d\_Bacteria;p\_Bacteroidota;c\_Bacteroidia;o\_Bacteroidales;f\_Bacteroidaceae;g\_Bacteroides  
S9\_vs\_83108 82.91 d\_Bacteria;p\_Bacteroidota;c\_Bacteroidia;o\_Bacteroidales;f\_Bacteroidaceae;g\_Phocaeicola  
S9\_vs\_84046 20.91 d\_Bacteria;p\_Firmicutes;c\_Clostridia;o\_Oscillospirales;f\_Oscillospiraceae;g\_An92  
S9\_vs\_88286 10.88 d\_Bacteria;p\_Firmicutes;c\_Clostridia;o\_Lachnospirales;f\_Lachnospiraceae;g\_Eisenbergiella  
S9\_vs\_90727 57.49 d\_Bacteria;p\_Firmicutes;c\_Clostridia;o\_Oscillospirales;f\_Acutalibacteraceae;g\_Ruminococcus\_E  
S9\_vs\_90846 37.71 d\_Bacteria;p\_Firmicutes;c\_Bacilli;o\_Erysipelotrichales;f\_Erysipelotrichaceae;g\_Clostridium\_AQ  
S9\_vs\_90848 51.41 d\_Bacteria;p\_Firmicutes;c\_Clostridia;o\_Lachnospirales;f\_Lachnospiraceae;g\_Enterocloster  
S9\_vs\_90849 70.89 d\_Bacteria;p\_Firmicutes;c\_Clostridia;o\_Lachnospirales;f\_Anaerotrignaceae;g\_Anaerotrignum  
S9\_vs\_90851 89.56 d\_Bacteria;p\_Firmicutes;c\_Clostridia;o\_Clostridiales;f\_Clostridiaceae;g\_Clostridium  
S9\_vs\_90851 89.56 d\_Bacteria;p\_Firmicutes;c\_Clostridia;o\_Clostridiales;f\_Clostridiaceae;g\_Clostridium\_F  
S9\_vs\_90851 89.56 d\_Bacteria;p\_Firmicutes;c\_Clostridia;o\_Clostridiales;f\_Clostridiaceae;g\_Clostridium\_P  
S9\_vs\_90859 43.06 d\_Bacteria;p\_Firmicutes;c\_Clostridia;o\_Lachnospirales;f\_Lachnospiraceae;g\_Blautia\_A  
S9\_vs\_90860 20.66 d\_Bacteria;p\_Firmicutes;c\_Clostridia;o\_Oscillospirales;f\_Acutalibacteraceae;g\_UMGS1591

95 blast;96.50 iPhoP-RF;50.70  
90.1 blast;92.60 iPhoP-RF;81.40  
100 RaFAH;97.40 blast;97.40 iPhoP-RF;96.70 CRISPR;54.10  
94.6 blast;96.20 iPhoP-RF;95.70  
97.9 blast;98.50 iPhoP-RF;96.40 CRISPR;53.40  
91.5 blast;93.80 iPhoP-RF;50.70  
91.5 blast;93.80 iPhoP-RF;85.70  
90.2 blast;92.70 iPhoP-RF;58.40  
91.8 CRISPR;94.10 blast;90.90 iPhoP-RF;81.90  
95.6 blast;96.90  
97.8 blast;98.40 iPhoP-RF;88.20  
95.4 iPhoP-RF;94.40 RaFAH;71.80  
91.1 blast;93.50 iPhoP-RF;82.80 CRISPR;64.80  
100 RaFAH;98.30 blast;96.50 iPhoP-RF;93.40  
90.2 blast;92.70  
100 blast;97.60 RaFAH;97.40 iPhoP-RF;93.40  
96.3 RaFAH;97.40  
95.6 blast;96.90 iPhoP-RF;94.70  
100 RaFAH;99.70 CRISPR;98.30 blast;94.40 iPhoP-RF;92.80  
93 CRISPR;95.00  
100 RaFAH;99.70 CRISPR;99.00 blast;96.80 iPhoP-RF;96.70  
99 CRISPR;99.00 blast;96.30 iPhoP-RF;96.10 RaFAH;59.50  
93.4 RaFAH;95.30 blast;50.00  
93.4 RaFAH;95.30  
97.2 CRISPR;98.00 blast;96.80 iPhoP-RF;78.70  
92.6 RaFAH;94.70  
100 RaFAH;99.80 CRISPR;99.00 blast;95.80 iPhoP-RF;94.40  
99.3 iPhoP-RF;97.10 blast;95.70 RaFAH;90.00  
92.2 iPhoP-RF;94.40  
91 blast;93.40 iPhoP-RF;87.00 CRISPR;73.90  
90.4 blast;92.90 iPhoP-RF;79.00 CRISPR;60.90  
91.6 blast;93.90 iPhoP-RF;77.30  
91.6 blast;93.90 iPhoP-RF;68.60  
97.2 blast;96.90 iPhoP-RF;85.10 CRISPR;84.10 RaFAH;68.00  
95.7 blast;97.00 iPhoP-RF;83.30 CRISPR;81.20  
95.9 iPhoP-RF;97.10 blast;96.90  
100 RaFAH;99.40 iPhoP-RF;97.10 blast;96.30  
95.3 iPhoP-RF;96.70  
95 RaFAH;96.50  
95 RaFAH;96.50  
91.6 blast;93.90 iPhoP-RF;73.70  
93.9 blast;95.70 iPhoP-RF;89.50  
91.6 blast;93.90 CRISPR;91.60 iPhoP-RF;75.40  
94 blast;95.80 iPhoP-RF;85.10  
96.6 blast;97.60 CRISPR;96.60 iPhoP-RF;90.50  
98.1 blast;98.60 iPhoP-RF;94.40 CRISPR;87.70  
90.2 blast;92.70 iPhoP-RF;79.00  
96.7 blast;97.70 iPhoP-RF;74.10  
92.5 blast;94.60 iPhoP-RF;94.40  
94.2 blast;95.90 iPhoP-RF;85.40 CRISPR;59.60  
99.3 blast;96.80 RaFAH;90.20 iPhoP-RF;54.90  
98.1 blast;98.60 iPhoP-RF;74.30  
94.6 blast;96.20 iPhoP-RF;87.00 CRISPR;69.00  
92.6 blast;94.70 iPhoP-RF;74.60  
94.3 blast;96.00 iPhoP-RF;80.60  
91.5 blast;93.80 iPhoP-RF;83.60  
94.9 blast;96.40 iPhoP-RF;84.50  
92.6 iPhoP-RF;94.70  
95.3 blast;96.70 CRISPR;95.50 iPhoP-RF;92.10  
96.6 blast;97.60 iPhoP-RF;86.00 CRISPR;60.90  
90.7 blast;93.10 iPhoP-RF;82.20  
96.4 CRISPR;97.50 blast;96.80 iPhoP-RF;86.00  
99.4 iPhoP-RF;97.10 blast;93.90 RaFAH;91.80  
98.1 CRISPR;98.60 iPhoP-RF;97.10 blast;91.90  
90.7 blast;93.10 iPhoP-RF;70.60  
98.1 CRISPR;98.60 blast;95.70 iPhoP-RF;95.40  
95.6 blast;96.90 iPhoP-RF;88.20  
97.5 blast;98.20 iPhoP-RF;62.70  
98.7 CRISPR;99.00 blast;93.90 iPhoP-RF;91.40  
95 CRISPR;96.50 blast;93.70 iPhoP-RF;92.10  
95.6 RaFAH;96.90  
95.6 RaFAH;96.90  
95.6 RaFAH;96.90  
95.3 blast;93.90 iPhoP-RF;75.90 RaFAH;73.20  
93.4 blast;95.30 iPhoP-RF;67.60









S2-wms-combined\_204225  
S2-wms-combined\_207000  
S2-wms-combined\_207000  
S2-wms-combined\_208559  
S2-wms-combined\_210822  
S2-wms-combined\_218002  
S2-wms-combined\_218002  
S2-wms-combined\_218002  
S2-wms-combined\_218002  
S2-wms-combined\_222535  
S2-wms-combined\_222535  
S2-wms-combined\_225908  
S2-wms-combined\_238929  
S2-wms-combined\_24549  
S2-wms-combined\_25727  
S2-wms-combined\_25727  
S2-wms-combined\_30750  
S2-wms-combined\_31084  
S2-wms-combined\_48661  
S2-wms-combined\_52568  
S2-wms-combined\_57293  
S2-wms-combined\_5791  
S2-wms-combined\_5791  
S2-wms-combined\_58121  
S2-wms-combined\_58121  
S2-wms-combined\_58563  
S2-wms-combined\_58563  
S2-wms-combined\_58563  
S2-wms-combined\_58563  
S2-wms-combined\_62839  
S2-wms-combined\_64692  
S2-wms-combined\_64692  
S2-wms-combined\_6605  
S2-wms-combined\_71725  
S2-wms-combined\_71327  
S2-wms-combined\_74387  
S2-wms-combined\_75144  
S2-wms-combined\_7756  
S2-wms-combined\_84608  
S2-wms-combined\_85381  
S2-wms-combined\_93845  
S2-wms-combined\_93845  
S2-wms-combined\_93845  
S2-wms-combined\_95987  
S2-wms\_124416  
S2-wms\_128831  
S2-wms\_128831  
S2-wms\_128962  
S2-wms\_135687  
S2-wms\_140933  
S2-wms\_156439  
S2-wms\_161986  
S2-wms\_161986  
S2-wms\_192667  
S2-wms\_246296  
S2-wms\_246296  
S2-wms\_246296  
S2-wms\_246296  
S2-wms\_6424  
S2-wms\_79384  
S2-wms-combined\_135428  
S3-wms-combined\_45305  
S3-wms-combined\_73262  
S3-wms\_22744  
S3-wms\_22744  
S3-wms\_22744  
S3-wms\_23958  
S3-wms\_94494  
S4-wms-combined\_10758  
S4-wms-combined\_113721  
S4-wms-combined\_118531  
S4-wms-combined\_118531  
S4-wms-combined\_121978  
S4-wms-combined\_14411  
S4-wms-combined\_14411  
S4-wms-combined\_171284  
S4-wms-combined\_22012  
S4-wms-combined\_24659  
S4-wms-combined\_41490  
S4-wms-combined\_42647  
S4-wms-combined\_47565  
S4-wms-combined\_51079  
S4-wms-combined\_57123  
S4-wms-combined\_57963  
S4-wms-combined\_64632  
S4-wms-combined\_64632  
S4-wms-combined\_83492  
S4-wms-combined\_83492  
S4-wms-combined\_83492  
S4-wms\_107182  
S4-wms\_141687  
S4-wms\_161443  
S4-wms\_45128  
S4-wms\_50475  
S4-wms\_62635  
S4-wms\_62635  
S4-wms\_73990  
S5-wms-combined\_106597  
S5-wms-combined\_106597  
S5-wms-combined\_108794  
S5-wms-combined\_117095

6.16 d\_Bacteria.p\_Firmicutes\_c\_Ostroidia\_o\_Lachnospirales\_f\_Lachnospiraceae\_g\_Lachnospirillum\_A  
92.52 d\_Bacteria.p\_Firmicutes\_c\_Ostroidia\_o\_Lachnospirales\_f\_Lachnospiraceae\_g\_Agathobacter  
92.52 d\_Bacteria.p\_Firmicutes\_c\_Ostroidia\_o\_Lachnospirales\_f\_Lachnospiraceae\_g\_Roseburia  
10.84 d\_Bacteria.p\_Bacteroidetes\_c\_Bacteroidia\_o\_Bacteroidales\_f\_Rikenellaceae\_g\_Alistipes  
37.52 d\_Bacteria.p\_Bacteroidetes\_c\_Bacteroidia\_o\_Bacteroidales\_f\_Bacteroidaceae\_g\_Bacteroides  
99.73 d\_Bacteria.p\_Firmicutes\_c\_Ostroidia\_o\_Lachnospirales\_f\_Lachnospiraceae\_g\_Roseburia  
99.73 d\_Bacteria.p\_Firmicutes\_c\_Ostroidia\_o\_Lachnospirales\_f\_Lachnospiraceae\_g\_RUG115  
99.73 d\_Bacteria.p\_Firmicutes\_c\_Ostroidia\_o\_Lachnospirales\_f\_Lachnospiraceae\_g\_Agathobacter  
7.99 d\_Bacteria.p\_Firmicutes\_c\_Ostroidia\_o\_Lachnospirales\_f\_Lachnospiraceae\_g\_Agathobacter  
7.99 d\_Bacteria.p\_Firmicutes\_c\_Ostroidia\_o\_Lachnospirales\_f\_Lachnospiraceae\_g\_Roseburia  
87.71 d\_Bacteria.p\_Firmicutes\_c\_Ostroidia\_o\_Oscillospirales\_f\_Acutalibacteraceae\_g\_CAG-217  
100 d\_Bacteria.p\_Bacteroidetes\_c\_Bacteroidia\_o\_Bacteroidales\_f\_Bacteroidaceae\_g\_Bacteroides  
17.21 d\_Bacteria.p\_Firmicutes\_c\_Ostroidia\_o\_Oscillospirales\_f\_Oscillospiraceae\_g\_CAG-170  
17.49 d\_Bacteria.p\_Firmicutes\_c\_Ostroidia\_o\_Oscillospirales\_f\_Oscillospiraceae\_g\_Intestinimonas  
21.03 d\_Bacteria.p\_Firmicutes\_c\_Ostroidia\_o\_Christensenellales\_f\_CAG-74\_g\_Ventriicola  
21.03 d\_Bacteria.p\_Firmicutes\_c\_Ostroidia\_o\_Christensenellales\_f\_CAG-74\_g\_SFFH01  
11.82 d\_Bacteria.p\_Firmicutes\_c\_Ostroidia\_o\_Oscillospirales\_f\_Ruminococcaceae\_g\_Ruminococcus\_D  
22.49 d\_Bacteria.p\_Firmicutes\_c\_Ostroidia\_o\_Lachnospirales\_f\_Lachnospiraceae\_g\_Acetivibrio\_A  
11.3 d\_Bacteria.p\_Firmicutes\_c\_Ostroidia\_o\_Lachnospirales\_f\_Lachnospiraceae\_g\_Anaerostipes  
12.66 d\_Bacteria.p\_Firmicutes\_c\_Ostroidia\_o\_Oscillospirales\_f\_Oscillospiraceae\_g\_F23-802  
78.69 d\_Bacteria.p\_Firmicutes\_c\_Ostroidia\_o\_Oscillospirales\_f\_Ruminococcaceae\_g\_Faecalibacterium  
89.76 d\_Bacteria.p\_Firmicutes\_c\_Ostroidia\_o\_Lachnospirales\_f\_Lachnospiraceae\_g\_Agathobacter  
89.76 d\_Bacteria.p\_Firmicutes\_c\_Ostroidia\_o\_Lachnospirales\_f\_Lachnospiraceae\_g\_Roseburia  
89.76 d\_Bacteria.p\_Firmicutes\_c\_Ostroidia\_o\_Lachnospirales\_f\_Lachnospiraceae\_g\_Eisenbergella  
21.08 d\_Bacteria.p\_Bacteroidetes\_c\_Bacteroidia\_o\_Bacteroidales\_f\_Bacteroidaceae\_g\_Bacteroides  
21.08 d\_Bacteria.p\_Bacteroidetes\_c\_Bacteroidia\_o\_Bacteroidales\_f\_Bacteroidaceae\_g\_Phocaicola  
88.99 d\_Bacteria.p\_Firmicutes\_c\_Ostroidia\_o\_Clostridiales\_f\_Clostridiaceae\_g\_Clostridium  
88.99 d\_Bacteria.p\_Firmicutes\_c\_Ostroidia\_o\_Clostridiales\_f\_Clostridiaceae\_g\_Clostridium\_F  
88.99 d\_Bacteria.p\_Firmicutes\_c\_Ostroidia\_o\_Clostridiales\_f\_Clostridiaceae\_g\_Clostridium\_P  
88.99 d\_Bacteria.p\_Firmicutes\_c\_Ostroidia\_o\_Oscillospirales\_f\_Oscillospiraceae\_g\_F23-802  
32.39 d\_Bacteria.p\_Firmicutes\_c\_Ostroidia\_o\_Oscillospirales\_f\_Ruminococcaceae\_g\_Gemmiger  
24.76 d\_Bacteria.p\_Firmicutes\_c\_Ostroidia\_o\_Oscillospirales\_f\_Oscillospiraceae\_g\_  
24.76 d\_Bacteria.p\_Firmicutes\_c\_Ostroidia\_o\_Oscillospirales\_f\_Oscillospiraceae\_g\_Flavonifractor  
7.53 d\_Bacteria.p\_Firmicutes\_c\_Ostroidia\_o\_Oscillospirales\_f\_Oscillospiraceae\_g\_Flavonifractor  
19.31 d\_Bacteria.p\_Firmicutes\_c\_Ostroidia\_o\_Oscillospirales\_f\_Oscillospiraceae\_g\_Intestinimonas  
3.55 d\_Bacteria.p\_Firmicutes\_c\_Ostroidia\_o\_Lachnospirales\_f\_Lachnospiraceae\_g\_Faecalimonas  
38.64 d\_Bacteria.p\_Firmicutes\_c\_Ostroidia\_o\_Lachnospirales\_f\_Lachnospiraceae\_g\_Lachnospirillum\_A  
9.77 d\_Bacteria.p\_Bacteroidetes\_c\_Bacteroidia\_o\_Bacteroidales\_f\_Tannerellaceae\_g\_Parabacteroides  
9.67 d\_Bacteria.p\_Verrucomicrobiales\_c\_Verrucomicrobiales\_g\_Verrucomicrobiales\_f\_Akkermansiaceae\_g\_Akkermansia  
21.12 d\_Bacteria.p\_Proteobacteria\_c\_Gammaproteobacteria\_g\_Burkholderiales\_f\_Burkholderiaceae\_g\_Sutterella  
45.07 d\_Bacteria.p\_Firmicutes\_c\_Ostroidia\_o\_Lachnospirales\_f\_Lachnospiraceae\_g\_CAG-81  
99.44 d\_Bacteria.p\_Firmicutes\_c\_Ostroidia\_o\_Oscillospirales\_f\_Oscillospiraceae\_g\_ER4  
99.44 d\_Bacteria.p\_Firmicutes\_c\_Ostroidia\_o\_Oscillospirales\_f\_Oscillospiraceae\_g\_F23-802  
99.44 d\_Bacteria.p\_Firmicutes\_c\_Ostroidia\_o\_Oscillospirales\_f\_Oscillospiraceae\_g\_Flavonifractor  
3.24 d\_Bacteria.p\_Firmicutes\_c\_Ostroidia\_o\_Lachnospirales\_f\_Lachnospiraceae\_g\_Lachnospirillum\_A  
99.32 d\_Bacteria.p\_Firmicutes\_c\_Ostroidia\_o\_Oscillospirales\_f\_Ruminococcaceae\_g\_Faecalibacterium  
98.35 d\_Bacteria.p\_Proteobacteria\_c\_Gammaproteobacteria\_g\_Enterobacteriales\_f\_Enterobacteriaceae\_g\_Escherichia  
98.35 d\_Bacteria.p\_Patesibacteria\_c\_Patesibacteria\_o\_Patesibacteriales\_f\_UBA5633\_g\_MW001  
46.73 d\_Bacteria.p\_Bacteroidetes\_c\_Bacteroidia\_o\_Bacteroidales\_f\_Bacteroidaceae\_g\_Prevotella  
95.89 d\_Bacteria.p\_Firmicutes\_c\_Ostroidia\_o\_Oscillospirales\_f\_Acutalibacteraceae\_g\_Ruminococcus\_E  
43.87 d\_Bacteria.p\_Firmicutes\_c\_Ostroidia\_o\_Lachnospirales\_f\_Lachnospiraceae\_g\_Blaulatia\_A  
96.43 d\_Bacteria.p\_Bacteroidetes\_c\_Bacteroidia\_o\_Bacteroidales\_f\_Bacteroidaceae\_g\_Bacteroides  
99.14 d\_Bacteria.p\_Firmicutes\_c\_Ostroidia\_o\_Lachnospirales\_f\_Lachnospiraceae\_g\_Lachnospira  
99.14 d\_Bacteria.p\_Firmicutes\_c\_Ostroidia\_o\_Lachnospirales\_f\_Lachnospiraceae\_g\_Eubacterium\_G  
13.43 d\_Bacteria.p\_Firmicutes\_c\_Ostroidia\_o\_Lachnospirales\_f\_Lachnospiraceae\_g\_Eubacterium\_J  
98.04 d\_Bacteria.p\_Firmicutes\_c\_Ostroidia\_o\_Lachnospirales\_f\_Lachnospiraceae\_g\_Roseburia  
98.04 d\_Bacteria.p\_Firmicutes\_c\_Ostroidia\_o\_Lachnospirales\_f\_Lachnospiraceae\_g\_RUG115  
98.04 d\_Bacteria.p\_Firmicutes\_c\_Ostroidia\_o\_Lachnospirales\_f\_Lachnospiraceae\_g\_Agathobacter  
8.31 d\_Bacteria.p\_Bacteroidetes\_c\_Bacteroidia\_o\_Bacteroidales\_f\_Bacteroidaceae\_g\_Bacteroides  
81.02 d\_Bacteria.p\_Actinobacteriota\_c\_Coribacteriales\_g\_Coribacteriales\_f\_Eggerthellaceae\_g\_Eggerthella  
11.75 d\_Bacteria.p\_Actinobacteriota\_c\_Actinomycetia\_o\_Actinomycetales\_f\_Bifidobacteriaceae\_g\_Bifidobacterium  
27.39 d\_Bacteria.p\_Firmicutes\_c\_Ostroidia\_o\_Oscillospirales\_f\_Ruminococcaceae\_g\_Gemmiger  
99.96 d\_Bacteria.p\_Bacteroidetes\_c\_Bacteroidia\_o\_Bacteroidales\_f\_Bacteroidaceae\_g\_Bacteroides  
99.21 d\_Bacteria.p\_Firmicutes\_c\_Ostroidia\_o\_Oscillospirales\_f\_Ruminococcaceae\_g\_Faecalibacterium  
99.21 d\_Bacteria.p\_Firmicutes\_c\_Ostroidia\_o\_Oscillospirales\_f\_Oscillospiraceae\_g\_CAG-83  
99.21 d\_Bacteria.p\_Firmicutes\_c\_Ostroidia\_o\_Oscillospirales\_f\_Oscillospiraceae\_g\_Dysosmobacter  
21.78 d\_Bacteria.p\_Firmicutes\_c\_Ostroidia\_o\_Oscillospirales\_f\_Oscillospiraceae\_g\_CAG-170  
94.44 d\_Bacteria.p\_Actinobacteriota\_c\_Actinomycetia\_o\_Actinomycetales\_f\_Bifidobacteriaceae\_g\_Bifidobacterium  
88.87 d\_Bacteria.p\_Bacteroidetes\_c\_Bacteroidia\_o\_Bacteroidales\_f\_Tannerellaceae\_g\_Parabacteroides  
6.49 d\_Bacteria.p\_Firmicutes\_c\_Ostroidia\_o\_Lachnospirales\_f\_Ruminococcaceae\_g\_Gemmiger  
66.42 d\_Bacteria.p\_Firmicutes\_c\_Negativibacteriales\_o\_Acidaminococcales\_f\_Acidaminococcales\_g\_Phascocartobacterium\_A  
66.42 d\_Bacteria.p\_Firmicutes\_c\_Negativibacteriales\_o\_Acidaminococcales\_f\_Acidaminococcales\_g\_Phascocartobacterium  
87.01 d\_Bacteria.p\_Firmicutes\_c\_Ostroidia\_o\_Lachnospirales\_f\_Lachnospiraceae\_g\_Mediterraneibacter  
97.82 d\_Bacteria.p\_Bacteroidetes\_c\_Bacteroidia\_o\_Bacteroidales\_f\_Tannerellaceae\_g\_Marseille-P3160  
97.82 d\_Bacteria.p\_Bacteroidetes\_c\_Bacteroidia\_o\_Bacteroidales\_f\_Marinifilaceae\_g\_Odoribacter  
85.97 d\_Bacteria.p\_Actinobacteriota\_c\_Actinomycetia\_o\_Actinomycetales\_f\_Bifidobacteriaceae\_g\_Bifidobacterium  
25.83 d\_Bacteria.p\_Actinobacteriota\_c\_Coribacteriales\_o\_Coribacteriales\_f\_Coribacteriaceae\_g\_Collinella  
6.25 d\_Bacteria.p\_Firmicutes\_c\_Ostroidia\_o\_Lachnospirales\_f\_Lachnospiraceae\_g\_Roseburia  
99.65 d\_Bacteria.p\_Bacteroidetes\_c\_Bacteroidia\_o\_Bacteroidales\_f\_Rikenellaceae\_g\_Alistipes  
63.73 d\_Bacteria.p\_Firmicutes\_c\_Ostroidia\_o\_Oscillospirales\_f\_Ruminococcaceae\_g\_Faecalibacterium  
81.36 d\_Bacteria.p\_Firmicutes\_c\_Bacteroidia\_o\_Bacteroidales\_f\_Bacteroidaceae\_g\_Prevotella  
88.31 d\_Bacteria.p\_Actinobacteriota\_c\_Actinomycetia\_o\_Actinomycetales\_f\_Bifidobacteriaceae\_g\_Bifidobacterium  
13.17 d\_Bacteria.p\_Bacteroidetes\_c\_Bacteroidia\_o\_Bacteroidales\_f\_Bacteroidaceae\_g\_Prevotella  
74.8 d\_Bacteria.p\_Firmicutes\_c\_Negativibacteriales\_o\_Acidaminococcales\_f\_Acidaminococcales\_g\_Phascocartobacterium\_A  
43.29 d\_Bacteria.p\_Firmicutes\_c\_Ostroidia\_o\_Lachnospirales\_f\_Lachnospiraceae\_g\_Dorea\_A  
43.29 d\_Bacteria.p\_Firmicutes\_c\_Ostroidia\_o\_Lachnospirales\_f\_Lachnospiraceae\_g\_Lachnospirillum\_B  
86.97 d\_Bacteria.p\_Bacteroidetes\_c\_Bacteroidia\_o\_Bacteroidales\_f\_Bacteroidaceae\_g\_Bacteroides  
86.97 d\_Bacteria.p\_Bacteroidetes\_c\_Bacteroidia\_o\_Bacteroidales\_f\_Tannerellaceae\_g\_Parabacteroides  
86.97 d\_Bacteria.p\_Bacteroidetes\_c\_Bacteroidia\_o\_Bacteroidales\_f\_Bacteroidaceae\_g\_Phocaicola  
7.59 d\_Bacteria.p\_Actinobacteriota\_c\_Coribacteriales\_o\_Coribacteriales\_f\_Eggerthellaceae\_g\_CAG-1427  
37.81 d\_Bacteria.p\_Bacteroidetes\_c\_Bacteroidia\_o\_Bacteroidales\_f\_Bacteroidaceae\_g\_Prevotella  
5.84 d\_Bacteria.p\_Actinobacteriota\_c\_Actinomycetia\_o\_Actinomycetales\_f\_Bifidobacteriaceae\_g\_Bifidobacterium  
28.59 d\_Bacteria.p\_Bacteroidetes\_c\_Bacteroidia\_o\_Bacteroidales\_f\_Bacteroidaceae\_g\_Prevotella  
70.49 d\_Bacteria.p\_Bacteroidetes\_c\_Bacteroidia\_o\_Bacteroidales\_f\_Bacteroidaceae\_g\_Prevotella  
93.28 d\_Bacteria.p\_Firmicutes\_c\_Ostroidia\_o\_Lachnospirales\_f\_Lachnospiraceae\_g\_Blaulatia\_A  
93.28 d\_Bacteria.p\_Firmicutes\_c\_Ostroidia\_o\_Lachnospirales\_f\_Lachnospiraceae\_g\_Blaulatia\_A  
76.93 d\_Bacteria.p\_Bacteroidetes\_c\_Bacteroidia\_o\_Bacteroidales\_f\_Tannerellaceae\_g\_Parabacteroides  
25.93 d\_Bacteria.p\_Campylobacterota\_c\_Campylobacteriales\_f\_Campylobacteriaceae\_g\_Campylobacter\_D  
25.93 d\_Bacteria.p\_Campylobacterota\_c\_Campylobacteriales\_f\_Campylobacteriaceae\_g\_Campylobacter\_B  
58.74 d\_Bacteria.p\_Firmicutes\_c\_Ostroidia\_o\_Oscillospirales\_f\_Acutalibacteraceae\_g\_Ruminococcus\_F  
10.16 d\_Bacteria.p\_Firmicutes\_c\_Ostroidia\_o\_Oscillospirales\_f\_Acutalibacteraceae\_g\_UBA1417

91.6 blast:93.90 IPHoP-RF:79.30  
93.4 blast:95.30 IPHoP-RF:93.70  
93.7 IPHoP-RF:93.10 blast:92.00  
95.6 blast:96.90 IPHoP-RF:96.70  
91.8 IPHoP-RF:89.50 blast:81.20 RaFAH:71.80  
99.9 blast:98.50 IPHoP-RF:92.40 RaFAH:92.30  
99.3 RaFAH:92.30 blast:87.70 IPHoP-RF:83.10  
99 RaFAH:92.30 blast:89.90 IPHoP-RF:73.00  
92.1 blast:94.30 IPHoP-RF:92.10  
90.7 IPHoP-RF:93.10 blast:91.00  
95.6 blast:96.90 CRISPR:93.30 IPHoP-RF:79.00  
99.9 blast:96.90 IPHoP-RF:96.70 RaFAH:96.10  
91.4 blast:93.70 IPHoP-RF:78.30  
90.9 blast:93.30  
94.7 blast:96.30 IPHoP-RF:74.60  
94.7 blast:96.30 IPHoP-RF:71.90  
95.6 blast:96.90 IPHoP-RF:82.50  
90 blast:92.50 IPHoP-RF:69.10  
90.8 blast:93.20 IPHoP-RF:77.30  
92.3 blast:94.50 IPHoP-RF:80.30  
95.7 blast:96.90 IPHoP-RF:88.90 RaFAH:51.90  
92.1 CRISPR:94.30  
91 CRISPR:93.40  
90.8 blast:93.20  
95.9 IPHoP-RF:97.10 blast:91.00  
95.2 blast:96.60 IPHoP-RF:81.90  
95.4 RaFAH:96.80  
95.4 RaFAH:96.80  
94.4 RaFAH:96.80  
94.6 blast:96.20 IPHoP-RF:73.70  
97.6 blast:98.30 IPHoP-RF:87.30 CRISPR:73.60  
90.8 blast:93.20 IPHoP-RF:85.40  
90.4 blast:92.90 IPHoP-RF:82.20 CRISPR:53.30  
91.4 blast:93.70 IPHoP-RF:82.50  
91.4 blast:93.70 IPHoP-RF:80.40  
91.6 blast:93.90 IPHoP-RF:73.50  
94.3 blast:96.00 IPHoP-RF:82.50  
95.4 blast:96.80 IPHoP-RF:95.10  
96.9 blast:96.70 IPHoP-RF:91.10 CRISPR:86.00 RaFAH:66.20  
95.6 blast:96.90 IPHoP-RF:90.80 CRISPR:79.90  
93.8 blast:95.60 IPHoP-RF:80.60  
98.7 CRISPR:99.00 blast:91.30 IPHoP-RF:81.90  
95.4 blast:96.80  
90.8 RaFAH:96.20  
92.2 blast:95.20 IPHoP-RF:84.50  
100 RaFAH:99.60 blast:96.10 IPHoP-RF:79.30 CRISPR:55.70  
95.6 RaFAH:96.90  
92.3 blast:94.50 IPHoP-RF:66.30  
91.8 RaFAH:94.10  
99.7 CRISPR:99.00 blast:96.90 IPHoP-RF:92.40 RaFAH:85.50  
93.8 blast:90.60 RaFAH:76.60 IPHoP-RF:62.50  
100 RaFAH:99.60 blast:96.80 IPHoP-RF:95.70  
99.9 CRISPR:98.80 RaFAH:92.10 blast:84.30 IPHoP-RF:67.70  
91 RaFAH:92.10 blast:58.10  
91.6 blast:93.80 IPHoP-RF:62.20  
100 CRISPR:98.90 blast:94.40 RaFAH:93.70 IPHoP-RF:92.80  
99.9 CRISPR:98.20 RaFAH:93.70 blast:90.80 IPHoP-RF:84.80  
93.6 RaFAH:93.70 IPHoP-RF:64.00  
93.6 RaFAH:95.50  
94.9 CRISPR:96.40 RaFAH:50.20  
95.3 blast:96.70 IPHoP-RF:96.40 CRISPR:94.80  
94.2 blast:95.90 IPHoP-RF:76.60 CRISPR:55.10  
100 RaFAH:99.80 blast:93.60 IPHoP-RF:79.80 CRISPR:67.80  
97.2 CRISPR:98.00 blast:60.70 IPHoP-RF:52.00  
91.8 RaFAH:94.10  
91.8 RaFAH:94.10  
94.2 blast:95.90 IPHoP-RF:58.70  
99.3 blast:98.30 IPHoP-RF:97.10 CRISPR:83.00 RaFAH:81.50  
100 RaFAH:99.50 blast:89.70 IPHoP-RF:87.00  
95.6 blast:96.90 IPHoP-RF:92.80 CRISPR:57.80  
98.2 CRISPR:98.70 blast:96.80 IPHoP-RF:92.40  
90.7 blast:93.10 IPHoP-RF:84.20  
95 blast:96.50 IPHoP-RF:79.50  
98.4 CRISPR:98.80 IPHoP-RF:68.90  
97.5 RaFAH:96.20  
94.9 IPHoP-RF:96.70 CRISPR:96.00 blast:95.40  
98.7 CRISPR:99.00 blast:96.80 IPHoP-RF:89.20  
92.6 IPHoP-RF:94.70  
95.6 blast:96.90 IPHoP-RF:96.10  
95.7 blast:97.00 IPHoP-RF:78.00 CRISPR:67.90  
96.2 blast:97.30 IPHoP-RF:90.80  
99.9 CRISPR:99.60 IPHoP-RF:97.10 blast:96.80 RaFAH:71.10  
95.6 blast:96.90 IPHoP-RF:73.50  
95.6 blast:96.90 IPHoP-RF:64.80  
97.6 CRISPR:98.30 IPHoP-RF:95.40 blast:92.00  
91.4 IPHoP-RF:93.70 blast:82.20  
95.6 blast:89.90 IPHoP-RF:86.30 RaFAH:84.50  
93.9 blast:95.70 IPHoP-RF:85.70  
91.5 blast:93.80 IPHoP-RF:74.60  
96.9 blast:97.80  
98.4 CRISPR:98.80 blast:96.40 IPHoP-RF:79.00  
99.6 CRISPR:99.60 IPHoP-RF:78.00  
94.7 blast:96.30 CRISPR:93.50 IPHoP-RF:91.40  
97.3 blast:96.90 IPHoP-RF:94.40 RaFAH:69.20 CRISPR:50.60  
100 CRISPR:98.90 RaFAH:95.20 IPHoP-RF:93.70 blast:90.40  
93.2 RaFAH:95.20  
97.6 CRISPR:98.30 IPHoP-RF:82.80  
98.8 RaFAH:99.10  
91.6 blast:93.90  
95.6 blast:96.90 IPHoP-RF:89.50  
91 blast:93.40 IPHoP-RF:64.50

|                         |       |                                                                                                          |      |                                                    |
|-------------------------|-------|----------------------------------------------------------------------------------------------------------|------|----------------------------------------------------|
| 55-wms-combined, 117213 | 97.01 | Bacteria_Firmicutes_Actinobacteria_C__Actinomycetales_Actinomycetales_Bifidobacteriaceae_Bifidobacterium | 98.4 | CRISPR_97.10 blast:96.50 RafAH.98.70               |
| 55-wms-combined, 134381 | 97.01 | Bacteria_Firmicutes_Ostrioidea_Oscillospirales_Oscillospiraceae_CAG-83                                   | 98.4 | RafAH.98.30 blast:76.40                            |
| 55-wms-combined, 134381 | 97.01 | Bacteria_Firmicutes_Ostrioidea_Oscillospirales_Oscillospiraceae_Dysmorphobacter                          | 97.6 | RafAH.98.30                                        |
| 55-wms-combined, 134381 | 97.01 | Bacteria_Firmicutes_Ostrioidea_Oscillospirales_Oscillospiraceae_CAG-110                                  | 90.3 | blast:92.80                                        |
| 55-wms-combined, 145057 | 82.3  | Bacteria_Firmicutes_Ostrioidea_Oscillospirales_Oscillospiraceae_Flavivibrator                            | 95.6 | blast:96.30 PPHF-RF.95.70 CRISPR.53.80             |
| 55-wms-combined, 145057 | 82.3  | Bacteria_Firmicutes_Ostrioidea_Oscillospirales_Oscillospiraceae_Intestimonas                             | 93.1 | 1 PPHF-RF.95.10                                    |
| 55-wms-combined, 145057 | 82.3  | Bacteria_Firmicutes_Ostrioidea_Oscillospirales_Oscillospiraceae                                          | 92.2 | 2 PPHF-RF.94.40                                    |
| 55-wms-combined, 145057 | 82.3  | Bacteria_Firmicutes_Ostrioidea_Oscillospirales_Oscillospiraceae_Pseudoflavivibrator                      | 92.2 | 2 PPHF-RF.94.40                                    |
| 55-wms-combined, 156329 | 75.2  | Bacteria_Firmicutes_Bacilli_Erysipelotrichales_Erysipelotrichaceae_Clostridium_AQ                        | 95.6 | blast:97.10 CRISPR.90.20 PPHF-RF.75.20             |
| 55-wms-combined, 161515 | 3.66  | Bacteria_Firmicutes_Ostrioidea_Oscillospirales_Oscillospiraceae_Flavivibrator                            | 91.2 | blast:93.60 PPHF-RF.95.80                          |
| 55-wms-combined, 179431 | 11.6  | Bacteria_Bacteroidetes_Bacteroidia_Bacteroidales_Rikenellaceae                                           | 91.9 | blast:97.10 blast:96.10 CRISPR.84.60               |
| 55-wms-combined, 179431 | 13.11 | Bacteria_Firmicutes_Ostrioidea_Oscillospirales_Oscillospiraceae_CAG-83                                   | 91   | blast:93.30 PPHF-RF.86.70                          |
| 55-wms-combined, 181331 | 11.29 | Bacteria_Bacteroidetes_Bacteroidia_Bacteroidales_Rikenellaceae_Alistipes_A                               | 97   | blast:97.90 PPHF-RF.94.70                          |
| 55-wms-combined, 183536 | 90.68 | Bacteria_Proteobacteria_Gammaproteobacteria_Enterobacteriales_Enterobacteriaceae_Escherichia             | 98.8 | PHF-RF.97.10 blast:95.60 RafAH.85.20 CRISPR.70.30  |
| 55-wms-combined, 183536 | 90.68 | Bacteria_Proteobacteria_Gammaproteobacteria_Enterobacteriales_Enterobacteriaceae_Salmonella              | 90.4 | blast:93.20                                        |
| 55-wms-combined, 183536 | 3.6   | Bacteria_Firmicutes_Ostrioidea_Oscillospirales_Oscillospiraceae_Flavivibrator                            | 91.2 | blast:96.30 PPHF-RF.73.70                          |
| 55-wms-combined, 193135 | 16.23 | Bacteria_Cyanobacteria_Vampirovibrionia_Gastreaerophiales_Gastreaerophiliaceae_QAM01                     | 90.3 | blast:92.80                                        |
| 55-wms-combined, 204782 | 6.93  | Bacteria_Bacteroidetes_Bacteroidia_Bacteroidales_Rikenellaceae_Alistipes_A                               | 92.1 | blast:94.30 PPHF-RF.69.10                          |
| 55-wms-combined, 205046 | 4.59  | Bacteria_Firmicutes_Ostrioidea_Oscillospirales_Oscillospiraceae_Dysmorphobacter                          | 92.6 | PHF-RF.94.70 blast:93.60                           |
| 55-wms-combined, 207291 | 100   | Bacteria_Bacteroidetes_Bacteroidia_Bacteroidales_Bacteroidaceae_Bacteroides                              | 99.4 | blast:99.80 PPHF-RF.95.70 blast:91.90              |
| 55-wms-combined, 210559 | 81.3  | Bacteria_Bacteroidetes_Bacteroidia_Bacteroidales_Rikenellaceae                                           | 96.7 | blast:92.80 RafAH.94.50                            |
| 55-wms-combined, 26061  | 99.77 | Bacteria_Firmicutes_Ostrioidea_Lachnospirales_Lachnospiraceae_Blastia_A                                  | 90.7 | blast:92.80 PPHF-RF.88.50                          |
| 55-wms-combined, 3201   | 23.69 | Bacteria_Proteobacteria_Gammaproteobacteria_Burkholderiales_Burkholderiaceae_Daibacter                   | 90.9 | blast:93.30 PPHF-RF.69.80                          |
| 55-wms-combined, 39793  | 82.3  | Bacteria_Actinobacteria_Actinomycetales_Actinomycetales_Bifidobacteriaceae_Bifidobacterium               | 91.6 | blast:93.30 PPHF-RF.53.40 CRISPR.76.80             |
| 55-wms-combined, 52741  | 50.99 | Bacteria_Verrucomicrobiales_Verrucomicrobiales_Verrucomicrobiaceae_Akkermansia                           | 100  | RafAH.99.50 CRISPR.98.80 blast:96.90 PPHF-RF.81.60 |
| 55-wms-combined, 59864  | 95    | Bacteria_Bacteroidetes_Bacteroidia_Bacteroidales_Bacteroidaceae_Bacteroides                              | 99.4 | blast:99.80 PPHF-RF.96.10                          |
| 55-wms-combined, 66662  | 96.6  | Bacteria_Firmicutes_Ostrioidea_Christensenellales_Christensenellaceae_Christensenella                    | 90.7 | blast:93.10 PPHF-RF.82.20                          |
| 55-wms-combined, 66662  | 100   | Bacteria_Firmicutes_Ostrioidea_Oscillospirales_Ruminococcaceae_Ruthenibacterium                          | 97.2 | blast:98.00 PPHF-RF.88.50                          |
| 55-wms-combined, 67650  | 98.81 | Bacteria_Bacteroidetes_Bacteroidia_Bacteroidales_Rikenellaceae_Alistipes_A                               | 100  | RafAH.97.10 blast:96.90 PPHF-RF.93.70              |
| 55-wms-combined, 67650  | 98.81 | Bacteria_Bacteroidetes_Bacteroidia_Bacteroidales_Rikenellaceae_Alistipes_A                               | 95.6 | 9.5 RafAH.97.10                                    |
| 55-wms-combined, 72410  | 60.27 | Bacteria_Firmicutes_Ostrioidea_Oscillospirales_Ruminococcaceae_Ruthenibacterium                          | 90.4 | blast:93.30 PPHF-RF.72.60                          |
| 55-wms-combined, 7292   | 22.4  | Bacteria_Firmicutes_Ostrioidea_Oscillospirales_Accuhalibacteriaceae_Ruminococcus_E                       | 91.5 | CRISPR.98.20 blast:95.60 PPHF-RF.89.80             |
| 55-wms-combined, 73301  | 96.75 | Bacteria_Firmicutes_Ostrioidea_Lachnospirales_Lachnospiraceae_Dorea_A                                    | 94.6 | blast:96.20 PPHF-RF.93.10 CRISPR.58.60             |
| 55-wms-combined, 73301  | 96.75 | Bacteria_Firmicutes_Ostrioidea_Lachnospirales_Lachnospiraceae_Lachnospiraceae_B                          | 90.8 | blast:93.30 PPHF-RF.77.80                          |
| 55-wms-combined, 83470  | 82.36 | Bacteria_Bacteroidetes_Bacteroidia_Bacteroidales_Bacteroidaceae_Bacteroides                              | 99.4 | blast:96.30 PPHF-RF.96.70 RafAH.91.90              |
| 55-wms-combined, 83470  | 25.58 | Bacteria_Firmicutes_Ostrioidea_Eubacteriales_Eubacteriaceae_Eubacterium                                  | 92.6 | blast:94.70 PPHF-RF.76.80 CRISPR.77.00             |
| 55-wms-combined, 90115  | 99.97 | Bacteria_Bacteroidetes_Bacteroidia_Bacteroidales_Rikenellaceae_Alistipes_A                               | 94.6 | RafAH.96.10 blast:88.90                            |
| 55-wms-combined, 90115  | 99.97 | Bacteria_Bacteroidetes_Bacteroidia_Bacteroidales_Rikenellaceae_Alistipes_A                               | 94.5 | RafAH.96.10                                        |
| 55-wms-combined, 94482  | 15.25 | Bacteria_Bacteroidetes_Bacteroidia_Bacteroidales_Tannerellaceae_Parabacteroides                          | 94.9 | PHF-RF.96.40 blast:91.70                           |
| 55-wms-combined, 94482  | 15.25 | Bacteria_Bacteroidetes_Bacteroidia_Bacteroidales_Tannerellaceae_Macellibacteroides                       | 91.8 | PHF-RF.94.10 blast:81.60                           |
| 55-wms-combined, 98202  | 100   | Bacteria_Bacteroidetes_Bacteroidia_Bacteroidales_Bacteroidaceae_Bacteroides                              | 99.4 | RafAH.99.50                                        |
| 55-wms-combined, 98202  | 100   | Bacteria_Bacteroidetes_Bacteroidia_Bacteroidales_Rikenellaceae_Alistipes_A                               | 99.4 | blast:99.80 PPHF-RF.77.50                          |
| 55-wms_10               |       |                                                                                                          |      |                                                    |

57-wms-combined, 135154  
57-wms-combined, 136642  
57-wms-combined, 137858  
57-wms-combined, 139683  
57-wms-combined, 14267  
57-wms-combined, 143218  
57-wms-combined, 14529  
57-wms-combined, 14529  
57-wms-combined, 147158  
57-wms-combined, 156351  
57-wms-combined, 157260  
57-wms-combined, 157434  
57-wms-combined, 163980  
57-wms-combined, 167867  
57-wms-combined, 169375  
57-wms-combined, 169375  
57-wms-combined, 174935  
57-wms-combined, 185016  
57-wms-combined, 189250  
57-wms-combined, 190281  
57-wms-combined, 20921  
57-wms-combined, 217226  
57-wms-combined, 218379  
57-wms-combined, 218379  
57-wms-combined, 224523  
57-wms-combined, 235165  
57-wms-combined, 238231  
57-wms-combined, 239784  
57-wms-combined, 239784  
57-wms-combined, 26217  
57-wms-combined, 26217  
57-wms-combined, 28138  
57-wms-combined, 31068  
57-wms-combined, 3669  
57-wms-combined, 3697  
57-wms-combined, 43950  
57-wms-combined, 43950  
57-wms-combined, 62119  
57-wms-combined, 62119  
57-wms-combined, 69024  
57-wms-combined, 71592  
57-wms-combined, 72070  
57-wms-combined, 74829  
57-wms-combined, 84688  
57-wms-combined, 90393  
57-wms-combined, 90728  
57-wms, 113137  
57-wms, 123954  
57-wms, 127801  
57-wms, 151112  
57-wms, 157264  
57-wms, 244866  
57-wms, 80255  
58-wms-combined, 134098  
58-wms-combined, 146562  
58-wms-combined, 164289  
58-wms-combined, 169835  
58-wms-combined, 180957  
58-wms-combined, 185611  
58-wms-combined, 185611  
58-wms-combined, 211119  
58-wms-combined, 215102  
58-wms-combined, 215102  
58-wms-combined, 217866  
58-wms-combined, 217866  
58-wms-combined, 217866  
58-wms-combined, 217866  
58-wms-combined, 219796  
58-wms-combined, 225114  
58-wms-combined, 23583  
58-wms-combined, 239791  
58-wms-combined, 246185  
58-wms-combined, 246389  
58-wms-combined, 25607  
58-wms-combined, 26087  
58-wms-combined, 264711  
58-wms-combined, 270362  
58-wms-combined, 270362  
58-wms-combined, 40666  
58-wms-combined, 49369  
58-wms-combined, 68780  
58-wms-combined, 74275  
58-wms-combined, 81597  
58-wms-combined, 97848  
58-wms, 152831  
58-wms, 200781  
58-wms, 20528  
58-wms, 270  
58-wms, 30498  
58-wms, 48935  
58-wms, 57121  
58-wms, 58515  
58-wms, 82880  
58-wms, 82880  
59-wms-combined, 105462  
59-wms-combined, 105822  
59-wms-combined, 10990  
59-wms-combined, 122742  
59-wms-combined, 124857  
59-wms-combined, 2042  
59-wms-combined, 20485

99.98 d\_Bacteria.p\_Bacteroidota;c\_Bacteroidia;o\_Bacteroidales;f\_Bacteroidaceae;g\_Phocaeicola  
81.83 d\_Bacteria.p\_Actinobacteriota;c\_Actinomycetia;o\_Actinomycetales;f\_Bifidobacteriaceae;g\_Bifidobacterium  
55.93 d\_Bacteria.p\_Firmicutes;c\_Ostroidia;o\_Christensenellales;f\_Ruminococcaceae;g\_Faecalibacterium  
93.85 d\_Bacteria.p\_Firmicutes;c\_Ostroidia;o\_Oscillospirales;f\_Oscillospiraceae;g\_CAG-103  
96.95 d\_Bacteria.p\_Bacteroidota;c\_Bacteroidia;o\_Bacteroidales;f\_Rikenellaceae;g\_Alistipes  
6.41 d\_Bacteria.p\_Actinobacteriota;c\_Actinomycetia;o\_Actinomycetales;f\_Bifidobacteriaceae;g\_Bifidobacterium  
25.87 d\_Bacteria.p\_Firmicutes;c\_Ostroidia;o\_Christensenellales;f\_CAG-74g\_UBA11524  
25.87 d\_Bacteria.p\_Firmicutes;c\_Ostroidia;o\_Christensenellales;f\_CAG-74g\_UBA11524  
86.44 d\_Bacteria.p\_Actinobacteriota;c\_Actinomycetia;o\_Actinomycetales;f\_Bifidobacteriaceae;g\_Bifidobacterium  
22 d\_Bacteria.p\_Firmicutes;c\_Ostroidia;o\_Lachnospirales;f\_Lachnospiraceae;g\_Blautia\_A  
99.48 d\_Bacteria.p\_Firmicutes;c\_Ostroidia;o\_Lachnospirales;f\_Lachnospiraceae;g\_Lachnospira  
16.06 d\_Bacteria.p\_Firmicutes;c\_Ostroidia;o\_Lachnospirales;f\_Lachnospiraceae;g\_Mediterraneibacter  
78.4 d\_Bacteria.p\_Bacteroidota;c\_Bacteroidia;o\_Bacteroidales;f\_Rikenellaceae;g\_Alistipes  
10.54 d\_Bacteria.p\_Actinobacteriota;c\_Actinomycetia;o\_Actinomycetales;f\_Bifidobacteriaceae;g\_Bifidobacterium  
10.64 d\_Bacteria.p\_Firmicutes;c\_Bacilloi;f\_Erysipelotrichales;f\_Erysipelotrichotridaceae;g\_Erysipelotrichotridium  
10.64 d\_Bacteria.p\_Firmicutes;c\_Ostroidia;o\_Lachnospirales;f\_Lachnospiraceae;g\_Faecalimonas  
34.84 d\_Bacteria.p\_Actinobacteriota;c\_Actinomycetia;o\_Actinomycetales;f\_Bifidobacteriaceae;g\_Bifidobacterium  
95.96 d\_Bacteria.p\_Bacteroidota;c\_Bacteroidia;o\_Bacteroidales;f\_Bacteroidaceae;g\_Bacteroides  
21.37 d\_Bacteria.p\_Actinobacteriota;c\_Coribacteriia;o\_Coribacteriales;f\_Coribacteriaceae;g\_Collinsella  
13.36 d\_Bacteria.p\_Actinobacteriota;c\_Coribacteriia;o\_Coribacteriales;f\_Coribacteriaceae;g\_Collinsella  
29.3 d\_Bacteria.p\_Firmicutes;c\_Ostroidia;o\_Lachnospirales;f\_Lachnospiraceae;g\_Anaerobutylicum  
97.48 d\_Bacteria.p\_Verrucomicrobiota;c\_Verrucomicrobiae;o\_Verrucomicrobiales;f\_Akkermansiaceae;g\_Akkermansia  
16.97 d\_Bacteria.p\_Firmicutes;c\_Ostroidia;o\_Oscillospirales;f\_Actinobacteriaceae;g\_CAG-180  
16.97 d\_Bacteria.p\_Firmicutes;c\_Ostroidia;o\_Oscillospirales;f\_Actinobacteriaceae;g\_Fimicoccus  
99.68 d\_Bacteria.p\_Firmicutes;c\_Ostroidia;o\_Oscillospirales;f\_Ruminococcaceae;g\_Ruminococcus\_D  
18.87 d\_Bacteria.p\_Firmicutes;c\_Ostroidia;o\_Lachnospirales;f\_Lachnospiraceae;g\_Agathobacter  
39.27 d\_Bacteria.p\_Firmicutes;c\_Ostroidia;o\_Oscillospirales;f\_Ruminococcaceae;g\_Negativibacillus  
67.8 d\_Bacteria.p\_Bacteroidota;c\_Bacteroidia;o\_Bacteroidales;f\_Bacteroidaceae;g\_Bacteroides  
67.8 d\_Bacteria.p\_Bacteroidota;c\_Bacteroidia;o\_Bacteroidales;f\_Bacteroidaceae;g\_Phocaeicola  
100 d\_Bacteria.p\_Bacteroidota;c\_Bacteroidia;o\_Bacteroidales;f\_Rikenellaceae;g\_Alistipes  
100 d\_Bacteria.p\_Bacteroidota;c\_Bacteroidia;o\_Bacteroidales;f\_Rikenellaceae;g\_Alistipes\_A  
12.56 d\_Bacteria.p\_Firmicutes;c\_Ostroidia;o\_Oscillospirales;f\_Actinobacteriaceae;g\_Ruminococcus\_E  
9.44 d\_Bacteria.p\_Firmicutes;c\_Ostroidia;o\_Oscillospirales;f\_Oscillospiraceae;g\_Lawsontobacter  
8.7 d\_Bacteria.p\_Bacteroidota;c\_Bacteroidia;o\_Bacteroidales;f\_Bacteroidaceae;g\_Bacteroides  
72.05 d\_Bacteria.p\_Bacteroidota;c\_Bacteroidia;o\_Bacteroidales;f\_Rikenellaceae;g\_Alistipes  
99.99 d\_Bacteria.p\_Bacteroidota;c\_Bacteroidia;o\_Bacteroidales;f\_Bacteroidaceae;g\_Bacteroides  
99.99 d\_Bacteria.p\_Bacteroidota;c\_Bacteroidia;o\_Bacteroidales;f\_Bacteroidaceae;g\_Phocaeicola  
95.36 d\_Bacteria.p\_Bacteroidota;c\_Bacteroidia;o\_Bacteroidales;f\_Bacteroidaceae;g\_Phocaeicola  
99.99 d\_Bacteria.p\_Bacteroidota;c\_Bacteroidia;o\_Bacteroidales;f\_Bacteroidaceae;g\_Bacteroides  
99.99 d\_Bacteria.p\_Bacteroidota;c\_Bacteroidia;o\_Bacteroidales;f\_Bacteroidaceae;g\_Bacteroides  
58.17 d\_Bacteria.p\_Firmicutes;c\_Ostroidia;o\_Lachnospirales;f\_Lachnospiraceae;g\_Bariatricus  
39.23 d\_Bacteria.p\_Firmicutes;c\_Ostroidia;o\_Oscillospirales;f\_Ruminococcaceae;g\_Ruminococcus\_D  
35.71 d\_Bacteria.p\_Bacteroidota;c\_Bacteroidia;o\_Bacteroidales;f\_Bacteroidaceae;g\_Bacteroides  
77.29 d\_Bacteria.p\_Firmicutes;g\_Negativibacillus;f\_Yelloniellales;f\_Dialisteraceae;g\_Dialister  
29.6 d\_Bacteria.p\_Firmicutes;c\_Ostroidia;o\_Oscillospirales;f\_Oscillospiraceae;g\_Marseille\_P3106  
32.36 d\_Bacteria.p\_Bacteroidota;c\_Bacteroidia;o\_Bacteroidales;f\_Bacteroidaceae;g\_Bacteroides  
66.45 d\_Bacteria.p\_Bacteroidota;c\_Bacteroidia;o\_Bacteroidales;f\_Bacteroidaceae;g\_Bacteroides  
99.39 d\_Bacteria.p\_Firmicutes;c\_Ostroidia;o\_Oscillospirales;f\_Ruminococcaceae;g\_Faecalibacterium  
100 d\_Bacteria.p\_Bacteroidota;c\_Bacteroidia;o\_Bacteroidales;f\_Tamerrallaceae;g\_Parabacteroides  
10.6 d\_Bacteria.p\_Firmicutes;c\_Ostroidia;o\_Oscillospirales;f\_Oscillospiraceae;g\_ER4  
20.08 d\_Bacteria.p\_Firmicutes;c\_Ostroidia;o\_Lachnospirales;f\_Lachnospiraceae;g\_Anaerobutylicum  
5.31 d\_Bacteria.p\_Actinobacteriota;c\_Actinomycetia;o\_Actinomycetales;f\_Bifidobacteriaceae;g\_Bifidobacterium  
18.88 d\_Bacteria.p\_Bacteroidota;c\_Bacteroidia;o\_Bacteroidales;f\_Bacteroidaceae;g\_Bacteroides  
74.19 d\_Bacteria.p\_Firmicutes;c\_Ostroidia;o\_Oscillospirales;f\_Ruminococcaceae;g\_Ruminoclostridium\_E  
81.54 d\_Bacteria.p\_Firmicutes;c\_Ostroidia;o\_Oscillospirales;f\_Oscillospiraceae;g\_ER4  
66.24 d\_Bacteria.p\_Firmicutes;c\_Ostroidia;o\_Christensenellales;f\_CAG-138g\_UBA1685  
21.14 d\_Bacteria.p\_Firmicutes;c\_Ostroidia;o\_Christensenellales;f\_CAG-138g\_SFEL01  
17.94 d\_Bacteria.p\_Firmicutes;c\_Ostroidia;o\_Oscillospirales;f\_Oscillospiraceae;g\_CAG-83  
99.92 d\_Bacteria.p\_Bacteroidota;c\_Bacteroidia;o\_Bacteroidales;f\_Tamerrallaceae;g\_Parabacteroides  
9.67 d\_Bacteria.p\_Firmicutes;c\_Ostroidia;o\_Christensenellales;f\_CAG-74g\_Limnismia  
9.67 d\_Bacteria.p\_Firmicutes;c\_Ostroidia;o\_Christensenellales;f\_CAG-74g\_Firm-11  
22.48 d\_Bacteria.p\_Firmicutes;c\_Ostroidia;o\_Christensenellales;f\_CAG-138g\_UBA1685  
12.51 d\_Bacteria.p\_Firmicutes;c\_Ostroidia;o\_Christensenellales;f\_CAG-74g\_UBA11524  
12.51 d\_Bacteria.p\_Firmicutes;c\_Ostroidia;o\_Christensenellales;f\_CAG-74g\_UBA11524  
98.95 d\_Bacteria.p\_Firmicutes;c\_Ostroidia;o\_Lachnospirales;f\_Lachnospiraceae;g\_Roseburia  
98.95 d\_Bacteria.p\_Firmicutes;c\_Ostroidia;o\_Lachnospirales;f\_Lachnospiraceae;g\_Agathobacter  
98.95 d\_Bacteria.p\_Firmicutes;c\_Ostroidia;o\_Lachnospirales;f\_Lachnospiraceae;g\_Eubacterium\_F  
14.07 d\_Bacteria.p\_Firmicutes;c\_Ostroidia;o\_Christensenellales;f\_CAG-138g\_UBA1685  
99.67 d\_Bacteria.p\_Firmicutes;c\_Ostroidia;o\_Oscillospirales;f\_Ruminococcaceae;g\_Faecalibacterium  
28.29 d\_Bacteria.p\_Bacteroidota;c\_Bacteroidia;o\_Bacteroidales;f\_Rikenellaceae;g\_Alistipes\_A  
19.46 d\_Bacteria.p\_Bacteroidota;c\_Bacteroidia;o\_Bacteroidales;f\_Bacteroidaceae;g\_Bacteroides  
33.37 d\_Bacteria.p\_Verrucomicrobiota;c\_Verrucomicrobiae;o\_Verrucomicrobiales;f\_Akkermansiaceae;g\_Akkermansia  
21.76 d\_Bacteria.p\_Firmicutes;c\_Ostroidia;o\_Oscillospirales;f\_Oscillospiraceae;g\_ER4  
54.47 d\_Bacteria.p\_Firmicutes;c\_Ostroidia;o\_Oscillospirales;f\_Oscillospiraceae;g\_UBA9475  
100 d\_Bacteria.p\_Bacteroidota;c\_Bacteroidia;o\_Bacteroidales;f\_Rikenellaceae;g\_Alistipes  
10.73 d\_Bacteria.p\_Firmicutes;c\_Ostroidia;o\_Christensenellales;f\_CAG-138g\_SFEL01  
99.95 d\_Bacteria.p\_Bacteroidota;c\_Bacteroidia;o\_Bacteroidales;f\_Rikenellaceae;g\_Alistipes  
99.95 d\_Bacteria.p\_Bacteroidota;c\_Bacteroidia;o\_Bacteroidales;f\_Rikenellaceae;g\_Alistipes\_A  
26.57 d\_Bacteria.p\_Firmicutes;c\_Ostroidia;o\_Oscillospirales;f\_Oscillospiraceae;g\_CAG-103  
96.98 d\_Bacteria.p\_Firmicutes;c\_Ostroidia;o\_Lachnospirales;f\_Ruminococcaceae;g\_Gemmiger  
51.97 d\_Bacteria.p\_Firmicutes;c\_Ostroidia;o\_Oscillospirales;f\_Oscillospiraceae;g\_T23-802  
54.68 d\_Bacteria.p\_Bacteroidota;c\_Bacteroidia;o\_Bacteroidales;f\_Bacteroidaceae;g\_Prevotella  
99.93 d\_Bacteria.p\_Bacteroidota;c\_Bacteroidia;o\_Bacteroidales;f\_Bacteroidaceae;g\_Bacteroides  
75.58 d\_Bacteria.p\_Bacteroidota;c\_Bacteroidia;o\_Bacteroidales;f\_Bacteroidaceae;g\_Bacteroides  
99.72 d\_Bacteria.p\_Firmicutes;c\_Ostroidia;o\_Oscillospirales;f\_Ruminococcaceae;g\_Faecalibacterium  
91.06 d\_Bacteria.p\_Firmicutes;c\_Ostroidia;o\_Oscillospirales;f\_Ruminococcaceae;g\_Faecalibacterium  
48.51 d\_Bacteria.p\_Firmicutes;c\_Ostroidia;o\_Oscillospirales;f\_Ruminococcaceae;g\_Gemmiger  
d\_Bacteria.p\_Bacteroidota;c\_Bacteroidia;o\_Bacteroidales;f\_Barnesiellaceae;g\_Barnesiella  
86.77 d\_Bacteria.p\_Firmicutes;c\_Ostroidia;o\_Oscillospirales;f\_Oscillospiraceae;g\_CAG-83  
39.33 d\_Bacteria.p\_Firmicutes;c\_Ostroidia;o\_Oscillospirales;f\_Oscillospiraceae;g\_CAG-83  
9.54 d\_Bacteria.p\_Firmicutes;c\_Ostroidia;o\_Christensenellales;f\_CAG-138g\_UBA1685  
74.23 d\_Bacteria.p\_Bacteroidota;c\_Bacteroidia;o\_Bacteroidales;f\_Rikenellaceae;g\_Alistipes  
30.76 d\_Bacteria.p\_Firmicutes;c\_Ostroidia;o\_Oscillospirales;f\_Oscillospiraceae;g\_An92  
30.76 d\_Bacteria.p\_Firmicutes;c\_Ostroidia;o\_Oscillospirales;f\_Oscillospiraceae;g\_Flavonifractor  
98 d\_Bacteria.p\_Firmicutes;c\_Ostroidia;o\_Lachnospirales;f\_Lachnospiraceae;g\_Anaerostipes  
44.89 d\_Bacteria.p\_Firmicutes;c\_Ostroidia;o\_Lachnospirales;f\_Lachnospiraceae;g\_Enterocloster  
10.09 d\_Bacteria.p\_Firmicutes;c\_Ostroidia;o\_Lachnospirales;f\_Lachnospiraceae;g\_Blautia\_A  
8.62 d\_Bacteria.p\_Firmicutes;c\_Ostroidia;o\_Oscillospirales;f\_Oscillospiraceae;g\_Flavonifractor  
79.58 d\_Bacteria.p\_Firmicutes;c\_Ostroidia;o\_Oscillospirales;f\_Oscillospiraceae;g\_Flavonifractor  
10.88 d\_Bacteria.p\_Firmicutes;c\_Ostroidia;o\_Lachnospirales;f\_Lachnospiraceae;g\_Eisenbergiella  
94.46 d\_Bacteria.p\_Firmicutes;c\_Bacilloi;f\_Lactobacillales;f\_Streptococcaceae;g\_Streptococcus

93.9 iPhOP-RF;95.70 blast;83.30  
99.7 CRISPR;99.40 iPhOP-RF;97.10 blast;96.80 RaFAH;72.30  
95.6 blast;96.90 iPhOP-RF;88.20  
93.5 CRISPR;95.40  
97.5 CRISPR;98.20 blast;98.10 iPhOP-RF;97.10  
95.2 blast;96.60 CRISPR;91.70 iPhOP-RF;81.90  
95.6 blast;96.90 iPhOP-RF;93.40  
95.6 blast;96.90 iPhOP-RF;92.80 CRISPR;76.00  
99 CRISPR;99.20 blast;96.90 iPhOP-RF;95.70 RaFAH;50.40  
94.5 blast;96.10 iPhOP-RF;94.10  
98.7 CRISPR;99.00  
91.4 blast;93.70 iPhOP-RF;86.30  
95.2 blast;96.60 iPhOP-RF;93.70  
97.9 CRISPR;98.50 iPhOP-RF;97.10 blast;96.70  
94.7 blast;96.30  
94.5 blast;96.10 iPhOP-RF;79.00  
96.3 CRISPR;97.40 blast;97.30 iPhOP-RF;97.10  
100 RaFAH;99.70 blast;95.30 iPhOP-RF;95.10  
98.7 CRISPR;99.00 blast;91.90 iPhOP-RF;80.00  
96.2 CRISPR;97.30 blast;96.90 iPhOP-RF;86.30  
95 blast;96.50 iPhOP-RF;77.50  
100 CRISPR;99.50 RaFAH;97.70 iPhOP-RF;58.20  
98.7 CRISPR;99.00 blast;96.60 iPhOP-RF;86.30  
1.7 blast;94.00 iPhOP-RF;91.80  
99.4 blast;96.80 iPhOP-RF;93.70 RaFAH;91.90  
90.2 blast;92.70  
95.6 blast;96.90 iPhOP-RF;77.50 CRISPR;68.00  
99.3 iPhOP-RF;97.10 RaFAH;89.00 blast;88.60  
91.5 blast;95.40 iPhOP-RF;84.80  
100 RaFAH;98.00 blast;96.90 iPhOP-RF;88.90  
97.2 RaFAH;98.00  
98.7 CRISPR;99.00 blast;96.80 iPhOP-RF;91.10  
91.5 blast;93.80 iPhOP-RF;81.90  
91.5 blast;93.80 iPhOP-RF;87.60  
98.8 iPhOP-RF;97.10 blast;96.90 CRISPR;95.90 RaFAH;84.30  
100 RaFAH;99.70 iPhOP-RF;95.10 blast;93.90  
92.9 blast;94.90 iPhOP-RF;93.10  
100 RaFAH;98.60 iPhOP-RF;97.10 blast;96.90  
98.8 blast;96.90 iPhOP-RF;96.40 CRISPR;93.30 RaFAH;84.80  
95.7 CRISPR;97.00 iPhOP-RF;86.70  
91.6 blast;93.90 iPhOP-RF;75.90  
98.1 blast;98.60 iPhOP-RF;92.40 CRISPR;61.00  
96.2 iPhOP-RF;97.10 blast;96.90 CRISPR;55.90 RaFAH;52.60  
97.3 CRISPR;97.40 blast;96.80 iPhOP-RF;94.70 RaFAH;63.90  
91.6 blast;93.90 iPhOP-RF;86.70  
99.4 iPhOP-RF;97.10 blast;91.80 RaFAH;91.30  
100 RaFAH;98.90 iPhOP-RF;96.70 blast;91.80  
99.4 RaFAH;99.50  
98.4 blast;96.40 RaFAH;82.90 iPhOP-RF;60.30  
97.2 CRISPR;99.00 blast;97.40 iPhOP-RF;93.70  
90.3 blast;92.80 iPhOP-RF;86.00  
99.7 CRISPR;99.70 iPhOP-RF;73.50  
97.6 CRISPR;98.30 iPhOP-RF;92.40  
91.5 blast;93.80 iPhOP-RF;67.00 CRISPR;57.40  
95.2 blast;96.60 iPhOP-RF;76.10  
93 blast;95.00 iPhOP-RF;82.80 CRISPR;70.40  
94.5 blast;96.10 iPhOP-RF;79.00 CRISPR;71.90  
95.6 blast;96.90 iPhOP-RF;64.30  
99.7 blast;96.70 RaFAH;95.30 iPhOP-RF;84.50 CRISPR;59.70  
94.2 blast;95.80 iPhOP-RF;76.60  
92 blast;94.20 iPhOP-RF;85.10  
95.9 blast;97.10 iPhOP-RF;77.50 CRISPR;68.50  
95.6 blast;96.90 iPhOP-RF;94.70  
95.6 blast;96.90 iPhOP-RF;93.40 CRISPR;77.10  
96.3 CRISPR;97.40 blast;68.80  
95.7 CRISPR;97.00 blast;61.30  
91.6 blast;93.90  
93.5 blast;95.40 CRISPR;93.90 iPhOP-RF;88.20  
100 CRISPR;98.40 RaFAH;98.00 blast;92.30 iPhOP-RF;88.50  
90.3 blast;92.80 iPhOP-RF;81.60 CRISPR;68.00  
96.3 iPhOP-RF;95.10 RaFAH;71.50  
98.4 CRISPR;98.80 blast;96.90 iPhOP-RF;81.10  
91.6 blast;93.90 iPhOP-RF;64.50  
91.2 blast;93.60 iPhOP-RF;68.90  
98.7 blast;96.90 iPhOP-RF;91.40 RaFAH;83.40  
91.9 blast;93.30 iPhOP-RF;74.80  
100 RaFAH;97.30 blast;96.90 iPhOP-RF;90.10  
96.2 RaFAH;97.30  
97.2 CRISPR;98.00 blast;94.30 iPhOP-RF;83.60  
94 blast;95.20 iPhOP-RF;61.70 RaFAH;56.00  
94.6 blast;96.20 iPhOP-RF;58.40  
99.3 blast;96.90 iPhOP-RF;91.40 RaFAH;90.60  
100 RaFAH;99.50 blast;95.10 iPhOP-RF;85.40  
98.8 RaFAH;92.20 blast;92.00 iPhOP-RF;62.20  
100 RaFAH;99.50 CRISPR;97.80 blast;95.40 iPhOP-RF;77.30  
92 CRISPR;99.20 blast;94.00 iPhOP-RF;83.30  
91.6 blast;93.90 iPhOP-RF;84.50  
94.6 blast;96.20 iPhOP-RF;68.20  
92.7 blast;86.00 RaFAH;81.50 iPhOP-RF;63.00  
90.9 blast;93.30 iPhOP-RF;77.30  
97.3 blast;98.10 iPhOP-RF;76.60 CRISPR;55.40  
96.3 iPhOP-RF;97.10 blast;96.70 CRISPR;91.70 RaFAH;55.50  
93 blast;95.00 iPhOP-RF;60.10  
91 blast;93.40 iPhOP-RF;75.90  
95.4 blast;96.80 CRISPR;91.30 iPhOP-RF;91.10  
95 blast;96.50 iPhOP-RF;87.60 CRISPR;52.20  
91.4 blast;97.00 iPhOP-RF;80.00  
90.3 blast;92.80 iPhOP-RF;72.80  
90.7 iPhOP-RF;93.10 blast;92.10 CRISPR;71.70  
95.2 CRISPR;96.60 blast;95.10 iPhOP-RF;93.40  
100 RaFAH;99.70 CRISPR;99.00 iPhOP-RF;97.10 blast;96.90

|                       |                                                                                                                           |                                                          |
|-----------------------|---------------------------------------------------------------------------------------------------------------------------|----------------------------------------------------------|
| 59-wms-combined_26410 | 99.06 d_Bacteria;p_Firmicutes;c__Clostridia;o__Lachnospirales;f__Lachnospiraceae;g__Mediterraneibacter                    | 95.4 blast;96.80                                         |
| 59-wms-combined_26410 | 99.06 d_Bacteria;p_Firmicutes;c__Clostridia;o__Lachnospirales;f__Lachnospiraceae;g__Hungatella                            | 95.2 blast;88.20 RaFAH;85.60                             |
| 59-wms-combined_27311 | 4.98 d_Bacteria;p_Firmicutes;c__Clostridia;o__Oscillospirales;f__Acutalibacteraceae;g__Acutalibacter                      | 91.4 blast;93.70 IPHoP-RF;76.10                          |
| 59-wms-combined_28805 | 94.95 d_Bacteria;p_Bacteroidota;c__Bacteroidia;o__Bacteroidales;f__Rikenellaceae;g__Alistipes                             | 99 blast;96.10 RaFAH;89.50 IPHoP-RF;68.40                |
| 59-wms-combined_31456 | 63.18 d_Bacteria;p_Bacteroidota;c__Bacteroidia;o__Bacteroidales;f__Barnesiellaceae;g__Barnesiella                         | 97.6 CRISPR;97.40 blast;96.90 IPHoP-RF;83.60 RaFAH;68.00 |
| 59-wms-combined_33229 | 87.21 d_Bacteria;p_Bacteroidota;c__Bacteroidia;o__Bacteroidales;f__Bacteroidaceae;g__Bacteroides                          | 99.1 IPHoP-RF;97.10 blast;96.10 RaFAH;87.90              |
| 59-wms-combined_33229 | 87.21 d_Bacteria;p_Bacteroidota;c__Bacteroidia;o__Bacteroidales;f__Bacteroidaceae;g__Phocaeicola                          | 94.5 IPHoP-RF;96.10                                      |
| 59-wms-combined_33230 | 93.11 d_Bacteria;p_Bacteroidota;c__Bacteroidia;o__Bacteroidales;f__Bacteroidaceae;g__Bacteroides                          | 100 RaFAH;99.10 IPHoP-RF;96.40 blast;92.10               |
| 59-wms-combined_3461  | 69.22 d_Bacteria;p_Firmicutes;c__Clostridia;o__Lachnospirales;f__Anaerostipes;g__Anaerostipes                             | 95 CRISPR;96.50 blast;91.10 IPHoP-RF;88.90               |
| 59-wms-combined_36459 | 25.89 d_Bacteria;p_Firmicutes;c__Clostridia;o__Oscillospirales;f__Ruminococcaceae;g__Negativibacillus                     | 96.2 blast;97.30 IPHoP-RF;85.10 CRISPR;59.60             |
| 59-wms-combined_37587 | 92.98 d_Bacteria;p_Bacteroidota;c__Bacteroidia;o__Bacteroidales;f__Bacteroidaceae;g__Bacteroides                          | 99.4 blast;96.80 IPHoP-RF;96.40 RaFAH;92.80              |
| 59-wms-combined_37587 | 92.98 d_Bacteria;p_Bacteroidota;c__Bacteroidia;o__Bacteroidales;f__Bacteroidaceae;g__Phocaeicola                          | 93.1 IPHoP-RF;95.10 blast;90.70                          |
| 59-wms-combined_44402 | 80.74 d_Bacteria;p_Bacteroidota;c__Bacteroidia;o__Bacteroidales;f__Bacteroidaceae;g__Bacteroides                          | 100 RaFAH;97.80 blast;96.50 IPHoP-RF;96.40               |
| 59-wms-combined_53991 | 30.5 d_Bacteria;p_Firmicutes;c__Negativicutes;o__Veillonellales;f__Dialisteraceae;g__Dialister                            | 95.4 blast;96.80 IPHoP-RF;91.80 CRISPR;60.90             |
| 59-wms-combined_53991 | 30.5 d_Bacteria;p_Firmicutes;c__Negativicutes;o__Veillonellales;f__Veillonellaceae;g__F0422                               | 90.4 RaFAH;92.90                                         |
| 59-wms-combined_53991 | 30.5 d_Bacteria;p_Firmicutes;c__Negativicutes;o__Veillonellales;f__Veillonellaceae;g__Veillonella                         | 90.4 RaFAH;92.90                                         |
| 59-wms-combined_53991 | 30.5 d_Bacteria;p_Firmicutes;c__Negativicutes;o__Veillonellales;f__Veillonellaceae;g__Veillonella_A                       | 90.4 RaFAH;92.90                                         |
| 59-wms-combined_5526  | 86.27 d_Bacteria;p_Bacteroidota;c__Bacteroidia;o__Bacteroidales;f__Rikenellaceae;g__Alistipes                             | 99.3 blast;96.80 IPHoP-RF;93.10 RaFAH;90.40              |
| 59-wms-combined_64277 | 98.37 d_Bacteria;p__Proteobacteria;c__Gammaproteobacteria;o__Enterobacteriales;f__Enterobacteriaceae;g__Escherichia       | 100 RaFAH;97.50 blast;96.90 IPHoP-RF;74.30               |
| 59-wms-combined_64277 | 98.37 d_Bacteria;p__Proteobacteria;c__Gammaproteobacteria;o__Enterobacteriales;f__Enterobacteriaceae;g__Escherichia_C     | 93.8 blast;95.60                                         |
| 59-wms-combined_64277 | 98.37 d_Bacteria;p__Proteobacteria;c__Gammaproteobacteria;o__Enterobacteriales;f__Enterobacteriaceae;g__Kluyvera          | 93.5 blast;95.40                                         |
| 59-wms-combined_64277 | 98.37 d_Bacteria;p__Proteobacteria;c__Gammaproteobacteria;o__Enterobacteriales;f__Enterobacteriaceae;g__Pseudocitrobacter | 91.7 blast;94.00                                         |
| 59-wms-combined_76274 | 91.87 d_Bacteria;p_Actinobacteriota;c__Actinomycetia;o__Actinomycetales;f__Bifidobacteriaceae;g__Bifidobacterium          | 99.4 CRISPR;98.60 IPHoP-RF;93.70 blast;92.70 RaFAH;81.60 |
| 59-wms-combined_93232 | 57.26 d_Bacteria;p__Proteobacteria;c__Gammaproteobacteria;o__Enterobacteriales;f__Enterobacteriaceae;g__Klebsiella        | 98.2 CRISPR;98.70 blast;96.90 IPHoP-RF;59.00             |
| 59-wms-combined_93232 | 57.26 d_Bacteria;p__Proteobacteria;c__Gammaproteobacteria;o__Enterobacteriales;f__Enterobacteriaceae;g__Klebsiella_A      | 94.7 blast;96.30                                         |
| 59-wms-combined_97755 | 40.71 d_Bacteria;p_Firmicutes;c__Clostridia;o__Lachnospirales;f__Lachnospiraceae;g__Eisenbergiella                        | 91 blast;93.40 IPHoP-RF;57.60                            |
| 59-wms-combined_9931  | 57.49 d_Bacteria;p_Firmicutes;c__Clostridia;o__Oscillospirales;f__Acutalibacteraceae;g__Ruminococcus_E                    | 95.4 blast;96.80 IPHoP-RF;92.10                          |
| 59-wms_104169         | d_Bacteria;p_Firmicutes;c__Clostridia;o__Oscillospirales;f__Ruminococcaceae;g__Ruthenibacterium                           | 91.6 blast;93.90 CRISPR;84.10 IPHoP-RF;79.50             |
| 59-wms_114971         | 60.7 d_Bacteria;p_Firmicutes;c__Negativicutes;o__Veillonellales;f__Veillonellaceae;g__Veillonella                         | 98.4 blast;95.00 RaFAH;88.20 IPHoP-RF;73.50 CRISPR;55.70 |
| 59-wms_19025          | 87.64 d_Bacteria;p_Firmicutes;c__Bacilli;o__Lactobacillales;f__Streptococcaceae;g__Streptococcus                          | 98.4 RaFAH;98.80                                         |
| 59-wms_64472          | 4.04 d_Bacteria;p_Firmicutes;c__Clostridia;o__Lachnospirales;f__Lachnospiraceae;g__Enterocloster                          | 93.5 blast;95.40 IPHoP-RF;85.10                          |

| Accession    | Strain | Real          | King           | Phy         | Class          | Order        | Family       | Subfamily    | Genus        | AAI to closest RaFI reference | Host                                                                                  |
|--------------|--------|---------------|----------------|-------------|----------------|--------------|--------------|--------------|--------------|-------------------------------|---------------------------------------------------------------------------------------|
| S10_v_13078  | Shared | n.a.          | n.a.           | n.a.        | n.a.           | n.a.         | n.a.         | n.a.         | n.a.         | 22.73                         | Bacteria_Firmicutes_Clostridia_Ocillospirales_Ocillospiraceae_Dysomobacter            |
| S10_v_14071  | Shared | n.a.          | Heunggongvirae | Uroviricota | Caudoviricetes | n.a.         | n.a.         | Unclassified | Unclassified | 91.64                         | Bacteria_Bacteroidetes_Bacteroidia_Bacteroidales_Tannerellaceae_Parabacteroides       |
| S10_v_24791  | SHVC   | Duplodnaviria | Heunggongvirae | Uroviricota | Caudoviricetes | n.a.         | Unclassified | Unclassified | Eponavirus   | 46.17                         | Bacteria_Firmicutes_Clostridia_Ocillospirales_Ruminococcaceae_Faecalibacterium        |
| S10_v_43964  | SHVC   | Duplodnaviria | Heunggongvirae | Uroviricota | Caudoviricetes | n.a.         | Unclassified | O            | O            | 91.64                         | Bacteria_Bacteroidetes_Bacteroidia_Bacteroidales_Factoriaceae_Bacteroides             |
| S10_v_64371  | Shared | n.a.          | n.a.           | n.a.        | n.a.           | n.a.         | n.a.         | n.a.         | n.a.         | 86.67                         | Bacteria_Firmicutes_Bacilli_Lactobacillales_Streptococcaceae_Streptococcus            |
| S10_v_80712  | Shared | n.a.          | n.a.           | n.a.        | n.a.           | n.a.         | n.a.         | n.a.         | n.a.         | 98.13                         | Bacteria_Firmicutes_Clostridia_Lachnospirales_Lachnospiraceae_Blausta_A               |
| S10_v_120489 | SHVC   | n.a.          | n.a.           | n.a.        | n.a.           | n.a.         | n.a.         | n.a.         | n.a.         | 7.64                          | Bacteria_Firmicutes_Clostridia_Chloriflexales_Lachnospirales_Blausta_A                |
| S10_v_120541 | SHVC   | n.a.          | n.a.           | n.a.        | n.a.           | n.a.         | n.a.         | n.a.         | n.a.         | 14.85                         | Bacteria_Firmicutes_Clostridia_Ocillospirales_Ocillospiraceae_CAG-110                 |
| S10_v_14557  | Shared | Duplodnaviria | Heunggongvirae | Uroviricota | Caudoviricetes | n.a.         | Dunneviridae | O            | O            | 99.66                         | Bacteria_Bacteroidetes_Bacteroidia_Bacteroidales_Factoriaceae_Bacteroides             |
| S10_v_46328  | SHVC   | Duplodnaviria | Heunggongvirae | Uroviricota | Caudoviricetes | n.a.         | Unclassified | O            | O            | 63.06                         | Bacteria_Firmicutes_Clostridia_Lachnospirales_Lachnospiraceae_UBA9502                 |
| S10_v_2538   | Shared | Duplodnaviria | Heunggongvirae | Uroviricota | Caudoviricetes | n.a.         | Unclassified | O            | O            | 31.92                         | Bacteria_Firmicutes_Clostridia_Negistoretococcales_Ananeroviraceae_CAG-145            |
| S10_v_4854   | Shared | Duplodnaviria | Heunggongvirae | Uroviricota | Caudoviricetes | n.a.         | Unclassified | Unclassified | Unclassified | 48.73                         | Bacteria_Bacteroidetes_Bacteroidia_Bacteroidales_Factoriaceae_Bacteroides             |
| S10_v_6240   | SHVC   | n.a.          | n.a.           | n.a.        | n.a.           | n.a.         | n.a.         | n.a.         | n.a.         | 8.93                          | Bacteria_Firmicutes_Clostridia_Ocillospirales_Actinobacteraceae_UBA1691               |
| S10_v_62320  | SHVC   | Duplodnaviria | Heunggongvirae | Uroviricota | Caudoviricetes | n.a.         | Unclassified | O            | O            | 25.76                         | Bacteria_Firmicutes_Clostridia_Ocillospirales_Clostridium                             |
| S10_v_36598  | Shared | n.a.          | n.a.           | n.a.        | n.a.           | n.a.         | n.a.         | n.a.         | n.a.         | 93.41                         | Bacteria_Bacteroidetes_Bacteroidia_Bacteroidales_Factoriaceae_Bacteroides             |
| S10_v_37379  | Shared | n.a.          | n.a.           | n.a.        | n.a.           | n.a.         | n.a.         | n.a.         | n.a.         | 75.26                         | Bacteria_Bacteroidetes_Bacteroidia_Bacteroidales_Tannerellaceae_Parabacteroides       |
| S10_v_58074  | Shared | Duplodnaviria | Heunggongvirae | Uroviricota | Caudoviricetes | n.a.         | Unclassified | Unclassified | Unclassified | 85.85                         | Bacteria_Bacteroidetes_Bacteroidia_Bacteroidales_Factoriaceae_Bacteroides             |
| S10_v_106834 | SHVC   | Duplodnaviria | Heunggongvirae | Uroviricota | Caudoviricetes | n.a.         | Unclassified | O            | O            | 44.85                         | Bacteria_Bacteroidetes_Bacteroidia_Bacteroidales_Factoriaceae_Bacteroides             |
| S10_v_67471  | SHVC   | n.a.          | n.a.           | n.a.        | n.a.           | n.a.         | n.a.         | n.a.         | n.a.         | 98.13                         | Bacteria_Bacteroidetes_Bacteroidia_Bacteroidales_Rikenellaceae_Alistipes              |
| S10_v_71900  | Shared | n.a.          | n.a.           | n.a.        | n.a.           | n.a.         | n.a.         | n.a.         | n.a.         | 97                            | Bacteria_Bacteroidetes_Bacteroidia_Bacteroidales_Factoriaceae_Bacteroides             |
| S11_v_140303 | Shared | Duplodnaviria | Heunggongvirae | Uroviricota | Caudoviricetes | Crassvirales | Suiviridae   | O            | O            | 37.57                         | Bacteria_Bacteroidetes_Bacteroidia_Bacteroidales_Factoriaceae_Prevotella              |
| S10_v_61776  | SHVC   | Duplodnaviria | Heunggongvirae | Uroviricota | Caudoviricetes | n.a.         | Unclassified | Unclassified | Unclassified | 44.54                         | Bacteria_Bacteroidetes_Bacteroidia_Bacteroidales_Factoriaceae_Bacteroides             |
| S10_v_120570 | Shared | n.a.          | n.a.           | n.a.        | n.a.           | n.a.         | n.a.         | n.a.         | n.a.         | 98.22                         | Bacteria_Firmicutes_Clostridia_Ocillospirales_Ruminococcaceae_Ruminococcus_D          |
| S11_v_140052 | ME     | Duplodnaviria | Heunggongvirae | Uroviricota | Caudoviricetes | n.a.         | Unclassified | O            | O            | 38.91                         | Bacteria_Firmicutes_Clostridia_Ocillospirales_Actinobacteraceae_CAG-180               |
| S10_v_77004  | Shared | n.a.          | n.a.           | n.a.        | n.a.           | n.a.         | n.a.         | n.a.         | n.a.         | 10.42                         | Bacteria_Firmicutes_Clostridia_Ocillospirales_Actinobacteraceae_Pseudomonococcus      |
| S11_v_140303 | ME     | Duplodnaviria | Heunggongvirae | Uroviricota | Caudoviricetes | n.a.         | Unclassified | O            | O            | 40.07                         | Bacteria_Bacteroidetes_Bacteroidia_Bacteroidales_Factoriaceae_Bacteroides             |
| S11_v_140471 | ME     | Duplodnaviria | Heunggongvirae | Uroviricota | Caudoviricetes | n.a.         | Unclassified | O            | O            | 20.29                         | Bacteria_Bacteroidetes_Bacteroidia_Bacteroidales_Factoriaceae_Bacteroides             |
| S11_v_150907 | ME     | Duplodnaviria | Heunggongvirae | Uroviricota | Caudoviricetes | n.a.         | Unclassified | O            | O            | 87.86                         | Bacteria_Firmicutes_Clostridia_Lachnospirales_Lachnospiraceae_Barturius               |
| S11_v_27845  | Shared | n.a.          | n.a.           | n.a.        | n.a.           | n.a.         | n.a.         | n.a.         | n.a.         | 53.78                         | Bacteria_Firmicutes_Bacilli_Lactobacillales_Streptococcaceae_Streptococcus            |
| S11_v_28515  | Shared | Duplodnaviria | Heunggongvirae | Uroviricota | Caudoviricetes | n.a.         | Unclassified | O            | O            | 95.85                         | Bacteria_Firmicutes_Clostridia_Lachnospirales_Lachnospiraceae_Blausta_A               |
| S11_v_28845  | ME     | n.a.          | n.a.           | n.a.        | n.a.           | n.a.         | n.a.         | n.a.         | n.a.         | 6.84                          | Bacteria_Firmicutes_Clostridia_Lachnospirales_Lachnospiraceae_Blausta_A               |
| S11_v_10997  | ME     | Duplodnaviria | Heunggongvirae | Uroviricota | Caudoviricetes | Crassvirales | Unclassified | Unclassified | Unclassified | 15                            | Bacteria_Bacteroidetes_Bacteroidia_Bacteroidales_Factoriaceae_Bacteroides             |
| S11_v_66522  | ME     | Duplodnaviria | Heunggongvirae | Uroviricota | Caudoviricetes | n.a.         | Unclassified | Unclassified | Unclassified | 97.65                         | Bacteria_Actinobacteriota_Actinomycetia_Actinomycetales_Actinomycetaceae_Paulseniella |
| S10_v_37694  |        |               |                |             |                |              |              |              |              |                               |                                                                                       |

| Confidence score | List of methods                                 |
|------------------|-------------------------------------------------|
| 95               | blast96.50 PhPp-RF71.90                         |
| 97               | blast93.53 PhPp-RF79.00                         |
| 93.8             | blast95.60 PhPp-RF94.90 PhPp-RF82.20            |
| 100              | RafAH99.20 CRISPp-RF37.10 PhPp-RF22.77          |
| 98.8             | RafAH98.90 PhPp-RF59.80                         |
| 100              | RafAH99.20 blast91.30 PhPp-RF86.30              |
| 90.3             | blast92.80 PhPp-RF56.50                         |
| 94.7             | blast96.30 PhPp-RF57.10 PhPp-RF96.90            |
| 100              | RafAH98.20 PhPp-RF57.10 PhPp-RF96.90 CRISPp30.3 |
| 91.4             | CRISPp93.70 blast91.51 PhPp-RF89.50             |
| 94.3             | blast96.00 PhPp-RF76.40                         |
| 99.3             | PhPp-RF37.10 blast96.00 RafAH94.00              |
| 94.7             | blast96.10 CRISPp90.20 PhPp-RF73.00             |
| 90.6             | blast93.30 PhPp-RF61.40                         |
| 100              | RafAH99.40 PhPp-RF96.70                         |
| 100              | CRISPp98.90 RafAH98.30 PhPp-RF57.10 blast94.8   |
| 100              | RafAH99.50 blast91.80 PhPp-RF64.00              |
| 93.3             | RafAH87.20 PhPp-RF55.40                         |
| 99.9             | RafAH97.30 blast95.80 PhPp-RF52.20              |
| 100              | RafAH99.30 PhPp-RF37.10 PhPp-RF10.90            |
| 91.7             | RafAH94.00                                      |
| 97               | PhPp-RF96.70 blast93.90 RafAH98.20              |
| 97               | blast98.00 PhPp-RF96.70 CRISPp87.50 RafAH87.4   |
| 91.5             | blast93.80 PhPp-RF55.40                         |
| 95.3             | blast96.70 CRISPp89.20 PhPp-RF87.60             |
| 90.6             | RafAH93.00                                      |
| 98.6             | CRISPp98.90 PhPp-RF22.80                        |
| 91.5             | blast93.50 PhPp-RF82.80                         |
| 100              | CRISPp98.80 RafAH97.70 PhPp-RF35.70             |
| 100              | RafAH98.80 blast94.04 PhPp-RF90.50 CRISPp68.0   |
| 92.5             | blast94.60 PhPp-RF51.70                         |
| 94.7             | blast93.70 PhPp-RF76.40                         |
| 100              | RafAH99.20 CRISPp99.30 PhPp-RF90.50             |
| 91.3             | PhPp-RF37.10 blast96.80 RafAH87.90 CRISPp55.6   |
| 99.3             | CRISPp97.20 blast97.30 PhPp-RF91.80 RafAH87.2   |
| 93               | CRISPp93.40                                     |
| 99.4             | CRISPp98.90 RafAH92.90 PhPp-RF79.00             |
| 97.8             | blast96.10 PhPp-RF79.90                         |
| 93.4             | blast95.30 PhPp-RF58.20                         |
| 97.2             | blast98.00 PhPp-RF56.70                         |
| 92.1             | blast94.30                                      |
| 91.7             | RafAH94.00                                      |
| 93.1             | blast95.60 PhPp-RF54.60                         |
| 100              | blast98.60 RafAH96.60 PhPp-RF83.30              |
| 90.3             | blast92.80 PhPp-RF81.50                         |
| 90.6             | blast93.00 PhPp-RF67.50                         |
| 97.3             | PhPp-RF57.10 blast96.80 PhPp-RF93.80 CRISPp83.3 |
| 90.8             | blast93.20 PhPp-RF77.20                         |
| 99.9             | RafAH98.80 PhPp-RF83.10 PhPp-RF57.90            |
| 91.4             | blast93.70 PhPp-RF83.10                         |
| 93.4             | RafAH95.50                                      |
| 95               | blast96.70                                      |
| 91               | blast98.40 PhPp-RF73.50 RafAH91.60              |
| 98.1             | blast92.60 RafAH90.60 PhPp-RF89.80              |
| 90.1             | blast92.60 PhPp-RF81.90                         |
| 95.3             | blast96.70                                      |
| 93               | blast95.00 PhPp-RF77.30                         |
| 95               | CRISPp96.50 blast93.70 PhPp-RF81.40             |
| 95.6             | blast96.70 PhPp-RF89.50 CRISPp76.50             |
| 95.9             | blast91.20 RafAH83.30 PhPp-RF57.90              |
| 97.3             | RafAH98.10                                      |
| 96.2             | PhPp-RF52.10 blast92.00 RafAH82.70              |
| 94.5             | PhPp-RF96.10 CRISPp91.90                        |
| 93.1             | PhPp-RF95.10 blast93.90                         |
| 94.3             | blast95.00 PhPp-RF81.40                         |
| 96.2             | CRISPp97.30 PhPp-RF97.10 blast96.60             |
| 95.3             | CRISPp96.70 PhPp-RF58.20                        |
| 99.9             | CRISPp98.30 RafAH97.30 blast96.90 PhPp-RF95.7   |
| 100              | RafAH97.10 PhPp-RF96.70 blast98.90              |
| 90.4             | blast92.90 PhPp-RF65.60                         |
| 98.4             | CRISPp98.80 blast92.30 PhPp-RF78.30             |
| 91.7             | blast94.00 PhPp-RF58.30                         |
| 98.5             | blast96.70 RafAH83.70                           |
| 95.1             | blast96.80 PhPp-RF64.80                         |
| 98.4             | blast98.80 CRISPp92.10 PhPp-RF96.10             |
| 100              | RafAH99.40 blast99.40 PhPp-RF57.90              |
| 100              | RafAH98.90 PhPp-RF97.10 blast95.90 CRISPp68.4   |
| 99.3             | RafAH99.40                                      |
| 94.9             | blast96.40 PhPp-RF57.10                         |
| 93               | blast95.00 PhPp-RF87.00                         |
| 92.1             | blast94.50                                      |
| 99.3             | PhPp-RF96.70 blast96.70 RafAH89.00              |
| 99.6             | RafAH99.60                                      |
| 94.9             | blast96.40 PhPp-RF53.80                         |
| 92.7             | blast94.80 PhPp-RF65.30                         |
| 93.8             | blast96.00 PhPp-RF67.30                         |
| 98.1             | blast98.60 PhPp-RF84.80                         |
| 100              | CRISPp98.80 RafAH98.60 blast96.90 PhPp-RF82.5   |
| 93               | blast95.00 PhPp-RF58.70                         |
| 97               | CRISPp97.90 blast96.90 PhPp-RF93.10             |
| 99.6             | CRISPp98.80 blast96.90 PhPp-RF94.40 RafAH84.6   |
| 90.1             | blast92.90 PhPp-RF68.90                         |
| 91.8             | RafAH94.10                                      |
| 91.8             | blast98.60 PhPp-RF83.30                         |
| 93.3             | CRISPp96.40                                     |
| 95.7             | RafAH97.00                                      |
| 92.9             | blast94.90 PhPp-RF66.50                         |
| 90.1             | blast92.60                                      |

|               |        |               |                |             |                    |               |                |              |                                                                                                             |
|---------------|--------|---------------|----------------|-------------|--------------------|---------------|----------------|--------------|-------------------------------------------------------------------------------------------------------------|
| S13_vf_56074  | ME     | Duplodnaviria | Heunggongvirae | Uroviricota | Caudoviricetes     | n.a.          | Unclassified   | Unclassified | 91.56_d_Bacteria_p_Bacteroidatac_Bacteroidia_o_Bacteroidales_f_Rikenellaceae_g_Alistipes                    |
| S13_vf_7670   | ME     | n.a.          | n.a.           | n.a.        | n.a.               | n.a.          | n.a.           | n.a.         | 6.84_d_Bacteria_p_Verrucomicrobiales_Verrucomicrobiales_Verrucomicrobiales_Akkermansia                      |
| S13_vf_87873  | Shared | Duplodnaviria | Heunggongvirae | Uroviricota | Caudoviricetes     | n.a.          | Unclassified   | Unclassified | 97.58_d_Bacteria_p_Bacteroidatac_Bacteroidia_o_Bacteroidales_f_Tannerellaceae_Marvella_P3160                |
| S13_vf_113593 | ME     | Duplodnaviria | Heunggongvirae | Uroviricota | Caudoviricetes     | n.a.          | Unclassified   | Unclassified | 40.01_d_Bacteria_p_Actinobacteriota_Actinomycetia_o_Actinomycetales_Bifidobacteriaceae_Bifidobacterium      |
| S13_vf_121307 | ME     | n.a.          | n.a.           | n.a.        | n.a.               | n.a.          | n.a.           | n.a.         | 11.04_d_Bacteria_p_Firmicutes_Clostridia_o_Clostridiales_f_Lachnospiraceae_Blaustia_A                       |
| S13_vf_148294 | ME     | Duplodnaviria | Heunggongvirae | Uroviricota | Caudoviricetes     | n.a.          | Unclassified   | O            | 57.95_d_Bacteria_p_Firmicutes_Clostridia_o_Oscillospirales_f_Oscillospiraceae_g                             |
| S13_vf_15645  | Shared | Duplodnaviria | Heunggongvirae | Uroviricota | Caudoviricetes     | n.a.          | Unclassified   | O            | 92_d_Bacteria_p_Bacteroidatac_Bacteroidia_o_Bacteroidales_f_Tannerellaceae_Parabacteroides                  |
| S13_vf_3006   | ME     | Duplodnaviria | Heunggongvirae | Uroviricota | Caudoviricetes     | n.a.          | Unclassified   | O            | 44.36_d_Bacteria_p_Firmicutes_Clostridia_o_Clostridiales_f_Acutibacteriaceae_UMG5263                        |
| S13_vf_30101  | Shared | Duplodnaviria | Heunggongvirae | Uroviricota | Caudoviricetes     | n.a.          | Unclassified   | O            | 54.46_d_Bacteria_p_Firmicutes_Bacillo_o_MU6151_261_CAG-313_CAG-313                                          |
| S13_vf_26756  | Shared | n.a.          | n.a.           | n.a.        | n.a.               | n.a.          | n.a.           | n.a.         | 9.7_d_Bacteria_p_Firmicutes_Bacillo_RF39f_UBA60g_CAG-460                                                    |
| S13_vf_35816  | Shared | Duplodnaviria | Heunggongvirae | Uroviricota | Caudoviricetes     | n.a.          | Unclassified   | Unclassified | 99.57_d_Bacteria_p_Firmicutes_Clostridia_o_Oscillospirales_f_Oscillospiraceae_CAG-83                        |
| S13_vf_56429  | Shared | n.a.          | n.a.           | n.a.        | n.a.               | n.a.          | n.a.           | n.a.         | 14.26_d_Bacteria_p_Firmicutes_Bacillo_RF39f_UBA60g_CAG-460                                                  |
| S13_vf_36748  | ME     | n.a.          | n.a.           | n.a.        | n.a.               | n.a.          | n.a.           | n.a.         | 49.79_d_Bacteria_p_Bacteroidatac_Bacteroidia_o_Bacteroidales_f_Rikenellaceae_Alistipes                      |
| S13_vf_43447  | Shared | n.a.          | n.a.           | n.a.        | n.a.               | n.a.          | n.a.           | n.a.         | 97.87_d_Bacteria_p_Bacteroidatac_Bacteroidia_o_Bacteroidales_f_Rikenellaceae_Alistipes                      |
| S13_vf_50967  | Shared | Monodnaviria  | Sangerivirae   | Phiviricota | Malgrandaviricetes | Petitivirales | Microviridae   | O            | d_Bacteria_p_Bacteroidatac_Bacteroidia_o_Bacteroidales_f_Barnesiellaceae_Barnesiella                        |
| S11_vf_38860  | ME     | n.a.          | n.a.           | n.a.        | n.a.               | n.a.          | n.a.           | n.a.         | 39.67_d_Bacteria_p_Firmicutes_Clostridia_o_Lachnospirales_f_Lachnospiraceae_Enterocloster                   |
| S13_vf_9438   | Shared | n.a.          | n.a.           | n.a.        | n.a.               | n.a.          | n.a.           | n.a.         | 7.33_d_Bacteria_p_Proteobacteria_o_Alphaproteobacteria_o_RF32_f_CAG-239g_CAG-267                            |
| S14_vf_100156 | ME     | Duplodnaviria | Heunggongvirae | Uroviricota | Caudoviricetes     | n.a.          | Unclassified   | Unclassified | 21.19_d_Bacteria_p_Firmicutes_Bacillo_Lactobacillales_f_Lactobacillaceae_Lactobacillus                      |
| S14_vf_109545 | Shared | n.a.          | n.a.           | n.a.        | n.a.               | n.a.          | n.a.           | n.a.         | 12.74_d_Bacteria_p_Firmicutes_Clostridia_o_Oscillospirales_f_Oscillospiraceae_Intestinimonas                |
| S14_vf_117150 | ME     | Duplodnaviria | Heunggongvirae | Uroviricota | Caudoviricetes     | n.a.          | Unclassified   | O            | 99.65_d_Bacteria_p_Firmicutes_Clostridia_o_Lachnospirales_f_Lachnospiraceae_Lachnospira                     |
| S11_vf_45558  | Shared | Duplodnaviria | Heunggongvirae | Uroviricota | Caudoviricetes     | n.a.          | Unclassified   | O            | 40.35_d_Bacteria_p_Bacteroidatac_Bacteroidia_o_Bacteroidales_f_Bacteroidaceae_Bacteroides                   |
| S14_vf_117157 | Shared | n.a.          | n.a.           | n.a.        | n.a.               | n.a.          | n.a.           | n.a.         | 99.57_d_Bacteria_p_Firmicutes_Bacillo_Lactobacillales_f_Streptococcaceae_Streptococcus                      |
| S11_vf_48109  | ME     | Duplodnaviria | Heunggongvirae | Uroviricota | Caudoviricetes     | n.a.          | Unclassified   | O            | 63.66_d_Bacteria_p_Firmicutes_Clostridia_o_Oscillospirales_f_Acutibacteriaceae_An172                        |
| S14_vf_37350  | ME     | Monodnaviria  | Sangerivirae   | Phiviricota | Malgrandaviricetes | Petitivirales | Microviridae   | Unclassified | 5.58_d_Bacteria_p_Bacteroidatac_Bacteroidia_o_Bacteroidales_f_Rikenellaceae_Alistipes                       |
| S14_vf_56130  | ME     | Duplodnaviria | Heunggongvirae | Uroviricota | Caudoviricetes     | n.a.          | Unclassified   | O            | 100_d_Bacteria_p_Firmicutes_Clostridia_o_Clostridiales_f_Clostridiaceae_Clostridium                         |
| S14_vf_58919  | ME     | Duplodnaviria | Heunggongvirae | Uroviricota | Caudoviricetes     | n.a.          | Unclassified   | Unclassified | Mushvuria                                                                                                   |
| S14_vf_72335  | ME     | Duplodnaviria | Heunggongvirae | Uroviricota | Caudoviricetes     | n.a.          | Unclassified   | O            | 74.74_d_Bacteria_p_Firmicutes_Clostridia_o_Lachnospirales_f_Lachnospiraceae_Roseburia                       |
| S14_vf_72953  | ME     | Duplodnaviria | Heunggongvirae | Uroviricota | Caudoviricetes     | n.a.          | Unclassified   | Unclassified | 11.73_d_Bacteria_p_Firmicutes_Bacillo_Erysipelotrichales_f_Erysipelotrichaceae_Holdemania                   |
| S14_vf_55144  | ME     | n.a.          | n.a.           | n.a.        | n.a.               | n.a.          | n.a.           | n.a.         | 32.12_d_Bacteria_p_Firmicutes_Bacillo_Lactobacillales_f_Lactobacillaceae_Lactisacibacillus                  |
| S14_vf_78139  | ME     | Duplodnaviria | Heunggongvirae | Uroviricota | Caudoviricetes     | n.a.          | Unclassified   | Unclassified | 12.8_d_Bacteria_p_Firmicutes_Clostridia_o_Oscillospirales_f_Erysipelotrichaceae_Massilimicrobiota           |
| S14_vf_78139  | ME     | Duplodnaviria | Heunggongvirae | Uroviricota | Caudoviricetes     | n.a.          | Unclassified   | Unclassified | 74.71_d_Bacteria_p_Firmicutes_Bacillo_Lactobacillales_f_Lactobacillaceae_Lactobacillus                      |
| S14_vf_92240  | Shared | Duplodnaviria | Heunggongvirae | Uroviricota | Caudoviricetes     | n.a.          | Unclassified   | O            | 99.79_d_Bacteria_p_Firmicutes_Clostridia_o_Lachnospirales_f_Lachnospiraceae_Coprococcus                     |
| S14_vf_99344  | Shared | n.a.          | n.a.           | n.a.        | n.a.               | n.a.          | n.a.           | n.a.         | 10.5_d_Bacteria_p_Firmicutes_Clostridia_o_Lachnospirales_f_Lachnospiraceae_Eubacterium_F                    |
| S14_vf_102698 | ME     | Duplodnaviria | Heunggongvirae | Uroviricota | Caudoviricetes     | n.a.          | Unclassified   | O            | 99.62_d_Bacteria_p_Firmicutes_Clostridia_o_Actetivirionales_f_Actetivirionaceae_Ruminiclostridium           |
| S14_vf_115150 | Shared | n.a.          | n.a.           | n.a.        | n.a.               | n.a.          | n.a.           | n.a.         | 39.46_d_Bacteria_p_Bacteroidatac_Bacteroidia_o_Bacteroidales_f_Bacteroidaceae_Bacteroides                   |
| S14_vf_117166 | Shared | n.a.          | n.a.           | n.a.        | n.a.               | n.a.          | n.a.           | n.a.         | 22.09_d_Bacteria_p_Firmicutes_Clostridia_o_Oscillospirales_f_Oscillospiraceae_Estepia                       |
| S11_vf_67573  | ME     | n.a.          | n.a.           | n.a.        | n.a.               | n.a.          | n.a.           | n.a.         | 11.32_d_Bacteria_p_Firmicutes_Clostridia_o_Lachnospirales_f_Lachnospiraceae_Enterocloster                   |
| S14_vf_14737  | ME     | Duplodnaviria | Heunggongvirae | Uroviricota | Caudoviricetes     | n.a.          | Unclassified   | O            | 33.52_d_Bacteria_p_Firmicutes_Clostridia_o_Oscillospirales_f_Ruminococcaceae_Ruthenbacterium                |
| S14_vf_15228  | Shared | Duplodnaviria | Heunggongvirae | Uroviricota | Caudoviricetes     | n.a.          | Unclassified   | O            | 86.47_d_Bacteria_p_Bacteroidatac_Bacteroidia_o_Bacteroidales_f_Tannerellaceae_Parabacteroides               |
| S11_vf_68848  | ME     | Duplodnaviria | Heunggongvirae | Uroviricota | Caudoviricetes     | n.a.          | Unclassified   | O            | 49.51_d_Bacteria_p_Firmicutes_Bacillo_Erysipelotrichales_f_Erysipelotrichaceae_Erysipelotrichodinium        |
| S14_vf_215852 | Shared | n.a.          | n.a.           | n.a.        | n.a.               | n.a.          | n.a.           | n.a.         | 26.78_d_Bacteria_p_Bacteroidatac_Bacteroidia_o_Bacteroidales_f_Bacteroidaceae_Bacteroides                   |
| S11_vf_6878   | ME     | Duplodnaviria | Heunggongvirae | Uroviricota | Caudoviricetes     | n.a.          | Unclassified   | O            | 72.71_d_Bacteria_p_Firmicutes_Clostridia_o_Lachnospirales_f_Lachnospiraceae_UBA11471f_UBA11471f             |
| S14_vf_2870   | ME     | Duplodnaviria | Heunggongvirae | Uroviricota | Caudoviricetes     | n.a.          | Unclassified   | O            | 56.13_d_Bacteria_p_Proteobacteria_o_Gammaproteobacteria_o_Burkholderiales_f_Burkholderiaceae_Sutterella     |
| S14_vf_32499  | Shared | Duplodnaviria | Heunggongvirae | Uroviricota | Caudoviricetes     | n.a.          | Unclassified   | O            | 51.73_d_Bacteria_p_Bacteroidatac_Bacteroidia_o_Bacteroidales_f_Acutibacteriaceae_Bacteroides                |
| S14_vf_3251   | ME     | n.a.          | n.a.           | n.a.        | n.a.               | n.a.          | n.a.           | n.a.         | 82.87_d_Bacteria_p_Firmicutes_Clostridia_o_Oscillospirales_f_Oscillospiraceae_Flavonifractor                |
| S14_vf_39797  | ME     | Duplodnaviria | Heunggongvirae | Uroviricota | Caudoviricetes     | n.a.          | Unclassified   | O            | 47.42_d_Bacteria_p_Firmicutes_Clostridia_o_Lachnospirales_f_Lachnospiraceae_Anaerostipes                    |
| S11_vf_79831  | ME     | n.a.          | n.a.           | n.a.        | n.a.               | n.a.          | n.a.           | n.a.         | 17.3_d_Bacteria_p_Bacteroidatac_Bacteroidia_o_Bacteroidales_f_UBA11471f_UBA11471f                           |
| S14_vf_59347  | ME     | n.a.          | Heunggongvirae | Uroviricota | Caudoviricetes     | n.a.          | Unclassified   | O            | 29.43_d_Bacteria_p_Firmicutes_Clostridia_o_Lachnospirales_f_Lachnospiraceae_Muricomes                       |
| S14_vf_61530  | ME     | n.a.          | n.a.           | n.a.        | n.a.               | n.a.          | n.a.           | n.a.         | 22.32_d_Bacteria_p_Firmicutes_Clostridia_o_Oscillospirales_f_Acutibacteriaceae_UBA1417                      |
| S11_vf_82331  | ME     | Duplodnaviria | Heunggongvirae | Uroviricota | Caudoviricetes     | n.a.          | Unclassified   | O            | 98.94_d_Bacteria_p_Cyanobacteria_o_Vampirovibrionia_o_Gastranaerophilales_f_Gastranaerophilaceae_QAM01      |
| S14_vf_631    | ME     | Duplodnaviria | Heunggongvirae | Uroviricota | Caudoviricetes     | n.a.          | Unclassified   | O            | 78.66_d_Bacteria_p_Firmicutes_Clostridia_o_Clostridiales_f_Clostridiaceae_Clostridium                       |
| S14_vf_82368  | ME     | Duplodnaviria | Heunggongvirae | Uroviricota | Caudoviricetes     | n.a.          | Unclassified   | O            | 62.18_d_Bacteria_p_Firmicutes_Clostridia_o_Oscillospirales_f_Lachnospiraceae_Blaustia_A                     |
| S14_vf_66139  | Shared | Duplodnaviria | Heunggongvirae | Uroviricota | Caudoviricetes     | n.a.          | Unclassified   | O            | 83.75_d_Bacteria_p_Firmicutes_Clostridia_o_Oscillospirales_f_Acutibacteriaceae_Ruminococcus_E               |
| S11_vf_83666  | ME     | Duplodnaviria | Heunggongvirae | Uroviricota | Caudoviricetes     | n.a.          | Unclassified   | O            | 35.28_d_Bacteria_p_Firmicutes_Clostridia_o_Lachnospirales_f_Lachnospiraceae_Dorea_A                         |
| S14_vf_66208  | Shared | Duplodnaviria | Heunggongvirae | Uroviricota | Caudoviricetes     | n.a.          | Unclassified   | O            | 100_d_Bacteria_p_Bacteroidatac_Bacteroidia_o_Bacteroidales_f_Bacteroidaceae_Bacteroides                     |
| S14_vf_66841  | Shared | Duplodnaviria | Heunggongvirae | Uroviricota | Caudoviricetes     | n.a.          | Unclassified   | O            | 15.26_d_Bacteria_p_Firmicutes_Clostridia_o_Oscillospirales_f_Lachnospiraceae_Agarhobacter                   |
| S14_vf_67094  | ME     | n.a.          | n.a.           | n.a.        | n.a.               | n.a.          | n.a.           | n.a.         | 10_d_Bacteria_p_Firmicutes_Clostridia_o_Oscillospirales_f_Oscillospiraceae_Lawsonbacter                     |
| S14_vf_73031  | ME     | Duplodnaviria | Heunggongvirae | Uroviricota | Caudoviricetes     | n.a.          | Unclassified   | O            | 15.25_d_Bacteria_p_Firmicutes_Clostridia_o_Oscillospirales_f_Ruminococcaceae_Massilimallae                  |
| S14_vf_78164  | ME     | Duplodnaviria | Heunggongvirae | Uroviricota | Caudoviricetes     | n.a.          | Unclassified   | O            | 61.84_d_Bacteria_p_Bacteroidatac_Bacteroidia_o_Bacteroidales_f_Marinifillicaceae_Odoribacter                |
| S14_vf_88666  | ME     | Duplodnaviria | Heunggongvirae | Uroviricota | Caudoviricetes     | n.a.          | Unclassified   | O            | 32.05_d_Bacteria_p_Firmicutes_Clostridia_o_Oscillospirales_f_Acutibacteriaceae_Fimivivinus                  |
| S14_vf_9676   | ME     | Duplodnaviria | Heunggongvirae | Uroviricota | Caudoviricetes     | n.a.          | Unclassified   | O            | 24.59_d_Bacteria_p_Firmicutes_Clostridia_o_Oscillospirales_f_Oscillospiraceae_Lawsonbacter                  |
| S14_vf_105542 | SHHC   | Duplodnaviria | Heunggongvirae | Uroviricota | Caudoviricetes     | n.a.          | Unclassified   | O            | 13.83_d_Bacteria_p_Firmicutes_Bacillo_RF39f_UBA60g_CAG-460                                                  |
| S15_vf_2032   | Shared | Duplodnaviria | Heunggongvirae | Uroviricota | Caudoviricetes     | n.a.          | Unclassified   | O            | 83.93_d_Bacteria_p_Bacteroidatac_Bacteroidia_o_Bacteroidales_f_Bacteroidaceae_Bacteroides                   |
| S15_vf_20644  | SHHC   | Duplodnaviria | Heunggongvirae | Uroviricota | Caudoviricetes     | n.a.          | Unclassified   | Unclassified | 83.74_d_Bacteria_p_Bacteroidatac_Bacteroidia_o_Bacteroidales_f_Rikenellaceae_Alistipes                      |
| S15_vf_2513   | SHHC   | n.a.          | n.a.           | n.a.        | n.a.               | n.a.          | n.a.           | n.a.         | 25.17_d_Bacteria_p_Firmicutes_Clostridia_o_Lachnospirales_f_Lachnospiraceae_Lachnospira                     |
| S15_vf_145044 | Shared | n.a.          | n.a.           | n.a.        | n.a.               | n.a.          | n.a.           | n.a.         | 32.93_d_Bacteria_p_Bacteroidatac_Bacteroidia_o_Bacteroidales_f_Rikenellaceae_Alistipes_A                    |
| S14_vf_70985  | Shared | n.a.          | n.a.           | n.a.        | n.a.               | n.a.          | n.a.           | n.a.         | 21.93_d_Bacteria_p_Bacteroidatac_Bacteroidia_o_Bacteroidales_f_Bacteroidaceae_Bacteroides                   |
| S12_vf_16374  | Shared | Duplodnaviria | Heunggongvirae | Uroviricota | Caudoviricetes     | n.a.          | Unclassified   | O            | 100_d_Bacteria_p_Bacteroidatac_Bacteroidia_o_Bacteroidales_f_Bacteroidaceae_Bacteroides                     |
| S15_vf_18274  | SHHC   | n.a.          | n.a.           | n.a.        | n.a.               | n.a.          | n.a.           | n.a.         | 75.03_d_Bacteria_p_Bacteroidatac_Bacteroidia_o_Bacteroidales_f_Coprobacteriaceae_Coprobacter                |
| S14_vf_74067  | Shared | n.a.          | n.a.           | n.a.        | n.a.               | n.a.          | n.a.           | n.a.         | 100_d_Bacteria_p_Bacteroidatac_Bacteroidia_o_Bacteroidales_f_Bacteroidaceae_Bacteroides                     |
| S12_vf_170614 | SHHC   | Duplodnaviria | Heunggongvirae | Uroviricota | Caudoviricetes     | n.a.          | Salasmaviridae | O            | 7.03_d_Bacteria_p_Actinobacteriota_o_Coribacteriales_o_Coribacteriales_f_Coribacteriaceae_Collinsella       |
| S15_vf_27510  | Shared | n.a.          | n.a.           | n.a.        | n.a.               | n.a.          | n.a.           | n.a.         | 51.41_d_Bacteria_p_Bacteroidatac_Bacteroidia_o_Bacteroidales_f_Bacteroidaceae_Bacteroides                   |
| S15_vf_35445  | Shared | n.a.          | n.a.           | n.a.        | n.a.               | n.a.          | n.a.           | n.a.         | 27.45_d_Bacteria_p_Bacteroidatac_Bacteroidia_o_Bacteroidales_f_Bacteroidaceae_Bacteroides                   |
| S12_vf_173666 | Shared | n.a.          | n.a.           | n.a.        | n.a.               | n.a.          | n.a.           | n.a.         | 36.83_d_Bacteria_p_Actinobacteriota_o_Coribacteriales_o_Coribacteriales_f_Eggerthellaceae_Adercreutzia      |
| S15_vf_71968  | Shared | Duplodnaviria | Heunggongvirae | Uroviricota | Caudoviricetes     | n.a.          | Unclassified   | O            | 100_d_Bacteria_p_Bacteroidatac_Bacteroidia_o_Bacteroidales_f_Rikenellaceae_Alistipes                        |
| S16_vf_1037   | SHHC   | n.a.          | n.a.           | n.a.        | n.a.               | n.a.          | n.a.           | n.a.         | 73.36_d_Bacteria_p_Firmicutes_Clostridia_o_Lachnospirales_f_Lachnospiraceae_Alistipes                       |
| S15_vf_75744  | Shared | Duplodnaviria | Heunggongvirae | Uroviricota | Caudoviricetes     | n.a.          | Unclassified   | O            | 99.22_d_Bacteria_p_Bacteroidatac_Bacteroidia_o_Bacteroidales_f_Bacteroidaceae_Bacteroides                   |
| S16_vf_168955 | Shared | Duplodnaviria | Heunggongvirae | Uroviricota | Caudoviricetes     | n.a.          | Salasmaviridae | O            | 11.84_d_Bacteria_p_Firmicutes_Clostridia_o_Oscillospirales_f_Ruminococcaceae_Ruthenbacterium                |
| S16_vf_173109 | SHHC   | Duplodnaviria | Heunggongvirae | Uroviricota | Caudoviricetes     | n.a.          | Unclassified   | Unclassified | 7.33_d_Bacteria_p_Actinobacteriota_o_Actinomycetia_o_Actinomycetales_f_Bifidobacteriaceae_Bifidobacterium   |
| S16_vf_36146  | Shared | Duplodnaviria | Heunggongvirae | Uroviricota | Caudoviricetes     | n.a.          | Unclassified   | O            | 99.74_d_Bacteria_p_Firmicutes_Clostridia_o_Clostridiales_f_Clostridiaceae_Clostridium                       |
| S15_vf_42043  | Shared | n.a.          | n.a.           | n.a.        | n.a.               | n.a.          | n.a.           | n.a.         | 51.36_d_Bacteria_p_Bacteroidatac_Bacteroidia_o_Bacteroidales_f_Bacteroidaceae_Bacteroides                   |
| S16_vf_5102   | Shared | Duplodnaviria | Heunggongvirae | Uroviricota | Caudoviricetes     | n.a.          | Unclassified   | Unclassified | 38.14_d_Bacteria_p_Firmicutes_Clostridia_o_Oscillospirales_f_Oscillospiraceae_FH4                           |
| S16_vf_87190  | SHHC   | Duplodnaviria | Heunggongvirae | Uroviricota | Caudoviricetes     | n.a.          | Unclassified   | O            | 34.33_d_Bacteria_p_Bacteroidatac_Bacteroidia_o_Bacteroidales_f_Bacteroidaceae_Bacteroides                   |
| S16_vf_90328  | SHHC   | Duplodnaviria | Heunggongvirae | Uroviricota | Caudoviricetes     | n.a.          | Unclassified   | O            | 16.6_d_Bacteria_p_Firmicutes_Clostridia_o_TANB77f_CAG-508g_CAG-269                                          |
| S12_vf_97279  | Shared | Duplodnaviria | Heunggongvirae | Uroviricota | Caudoviricetes     | n.a.          | Unclassified   | Unclassified | 52.37_d_Bacteria_p_Firmicutes_Clostridia_o_Oscillospirales_f_Oscillospiraceae_ER4                           |
| S12_vf_188846 | SHHC   | Monodnaviria  | Sangerivirae   | Phiviricota | Malgrandaviricetes | Petitivirales | Microviridae   | O            | d_Bacteria_p_Bacteroidatac_Bacteroidia_o_Bacteroidales_f_Barnesiellaceae_Barnesiella                        |
| S15_vf_108554 | Shared | n.a.          | n.a.           | n.a.        | n.a.               | n.a.          | n.a.           | n.a.         | 18.28_d_Bacteria_p_Firmicutes_Clostridia_o_Oscillospirales_f_Lachnospiraceae_Faecalibacterium               |
| S12_vf_18902  | Shared | Duplodnaviria | Heunggongvirae | Uroviricota | Caudoviricetes     | n.a.          | Unclassified   | O            | 80.1_d_Bacteria_p_Firmicutes_Clostridia_o_Oscillospirales_f_Oscillospiraceae_ER4                            |
| S16_vf_103726 | SHHC   | n.a.          | n.a.           | n.a.        | n.a.               | n.a.          | n.a.           | n.a.         | 26.95_d_Bacteria_p_Firmicutes_Clostridia_o_Oscillospirales_f_Ruminococcaceae_Ruthenbacterium                |
| S16_vf_116956 | SHHC   | n.a.          | n.a.           | n.a.        | n.a.               | n.a.          | n.a.           | n.a.         | 43.56_d_Bacteria_p_Firmicutes_Clostridia_o_Lachnospirales_f_Lachnospiraceae_Acetatifactor                   |
| S16_vf_120622 | SHHC   | Duplodnaviria | Heunggongvirae | Uroviricota | Caudoviricetes     | n.a.          | Unclassified   | O            | 61.91_d_Bacteria_p_Proteobacteria_o_Gammaproteobacteria_o_Burkholderiales_f_Burkholderiaceae_Parasutterella |
| S16_vf_123909 | SHHC   | n.a.          | n.a.           | n.a.        | n.a.               | n.a.          | n.a.           | n.a.         | 55.52_d_Bacteria_p_Firmicutes_Clostridia_o_Oscillospirales_f_Oscillospiraceae_Flavonifractor                |
| S16_vf_127669 | Shared | Duplodnaviria | Heunggongvirae | Uroviricota | Caudoviricetes     | n.a.          | Unclassified   | Unclassified | 99.82_d_Bacteria_p_Bacteroidatac_Bacteroidia_o_Bacteroidales_f_Bacteroidaceae_Bacteroides                   |
| S12_vf_61299  | SHHC   | Duplodnaviria | Heunggongvirae | Uroviricota | Caudoviricetes     | n.a.          | Salasmaviridae | O            | 11.99_d_Bacteria_p_Firmicutes_Clostridia_o_Lachnospirales_f_Lachnospiraceae_Muricomes                       |
| S16_vf_127905 | Shared | n.a.          | n.a.           | n.a.        | n.a.               | n.a.          | n.a.           | n.a.         | 55.65_d_Bacteria_p_Bacteroidatac_Bacteroidia_o_Bacteroidales_f_Bacteroidaceae_Bacteroides                   |
| S16_vf_136935 | Shared | n.a.          | n.a.           | n.a.        | n.a.               | n.a.          | n.a.           | n.a.         | 99.58_d_Bacteria_p_Bacteroidatac_Bacteroidia_o_Bacteroidales_f_Bacteroidaceae_Bacteroides                   |
| S16_vf_142551 | Shared | Duplodnaviria | Heunggongvirae | Uroviricota | Caudoviricetes     | n.a.          | Unclassified   | O            | 99.95_d_Bacteria_p_Bacteroidatac_Bacteroidia_o_Bacteroidales_f_Rikenellaceae_Alistipes_A                    |
| S16_vf_172079 | Shared | Duplodnaviria | Heunggongvirae | Uroviricota | Caudoviricetes     | n.a.          | Unclassified   | O            | 99.1_d_Bacteria_p_Firmicutes_Clostridia_o_Oscillospirales_f_Lachnospiraceae_Coprococcus                     |
| S16_vf_173096 | Shared | Duplodnaviria | Heunggongvirae | Uroviricota | Caudoviricetes     | n.a.          | Unclassified   | Unclassified | 74.56_d_Bacteria_p_Verrucomicrobiales_Verrucomicrobiales_Verrucomicrobiales_Akkermansia                     |
| S16_vf_18440  | SHHC   | Duplodnaviria | Heunggongvirae | Uroviricota | Caudoviricetes     | n.a.          | Unclassified   | Unclassified | 67.51_d_Bacteria_p_Firmicutes_Clostridia_o_Oscillospirales_f_Ruminococcaceae_Faecalibacterium               |
| S12_vf_111286 | SHHC   | n.a.          | n.a.           | n.a.        | n.a.               | n.a.          | n.a.           | n.a.         | 44.45_d_Bacteria_p_Bacteroidatac_Bacteroidia_o_Bacteroidales_f_Muribaculaceae_UBA7173                       |
| S16_vf_96483  | Shared | n.a.          | n.a.           | n.a.        | n.a.               | n.a.          | n.a.           | n.a.         | 29.87_d_Bacteria_p_Firmicutes_Clostridia_o_Lachnospirales_f_Lachnospiraceae_Blaustia_A                      |

|      |                                                   |
|------|---------------------------------------------------|
| 98.1 | RafAH98.60                                        |
| 100  | CRISPR.99.60 RafAH96.00 blast93.60 iPhoP-RF.72.60 |
| 98.4 | CRISPR.96.80 iPhoP-RF.72.60                       |
| 91.5 | blast93.80 iPhoP-RF.86.20 CRISPR.56.60            |
| 95.9 | CRISPR.89.80 RafAH85.80 iPhoP-RF.84.50            |
| 92.3 | blast94.50 iPhoP-RF.80.60                         |

|               |        |               |               |               |                    |              |                |              |                                                                                                              |                                                           |
|---------------|--------|---------------|---------------|---------------|--------------------|--------------|----------------|--------------|--------------------------------------------------------------------------------------------------------------|-----------------------------------------------------------|
| S16_v6_19968  | Shared | n.a.          | n.a.          | n.a.          | n.a.               | n.a.         | n.a.           | n.a.         | 93.01_d_Bacteria;p_Bacteroidta;c_Bacteroidia;o_Bacteroidales;f_Rikenellaceae;g_Alistipes                     | 98.4_iPhoP-RF;97.10 blast;96.90 RaFAH;79.60               |
| S16_v6_32764  | Shared | n.a.          | n.a.          | n.a.          | n.a.               | n.a.         | n.a.           | n.a.         | 17.71_d_Bacteria;p_Bacteroidta;c_Bacteroidia;o_Bacteroidales;f_Rikenellaceae;g_Alistipes                     | 95.9_iPhoP-RF;97.10 blast;96.90                           |
| S16_v6_33781  | Shared | n.a.          | n.a.          | n.a.          | n.a.               | n.a.         | n.a.           | n.a.         | 7.09_d_Bacteria;p_Bacteroidta;c_Bacteroidia;o_Bacteroidales;f_Rikenellaceae;g_Alistipes                      | 95.9_iPhoP-RF;97.10 blast;96.90                           |
| S16_v6_4062   | SHMC   | Duplodnaviria | Heunggongvrae | Uroviricota   | Caudoviricetes     | n.a.         | Unclassified   | Unclassified | 13.68_d_Bacteria;p_Actinobacteriata;c_Actinomycetia;o_Actinomycetales;f_Bifidobacteriaceae;g_Bifidobacterium | 92.6_CRSR;94.70 blast;92.60 iPhoP-RF;74.30                |
| S12_v6_133070 | Shared | Duplodnaviria | Heunggongvrae | Uroviricota   | Caudoviricetes     | n.a.         | Unclassified   | O            | 14.52_d_Bacteria;p_Firmicutes;c_Clostridia;o_Oscillospirales;f_Ruminococcaceae;g_CAG-353                     | 91.1_blast;93.50 iPhoP-RF;79.80                           |
| S16_v6_48714  | SHMC   | n.a.          | n.a.          | n.a.          | n.a.               | n.a.         | n.a.           | n.a.         | 5.9_d_Bacteria;p_Firmicutes;c_Clostridia;o_Oscillospirales;f_Ruminococcaceae;g_Ruminococcus_D                | 97_blast;97.00 iPhoP-RF;97.10 CRSR;96.60                  |
| S16_v6_51901  | SHMC   | n.a.          | n.a.          | n.a.          | n.a.               | n.a.         | n.a.           | n.a.         | 16.94_d_Bacteria;p_Bacteroidta;c_Bacteroidia;o_Bacteroidales;f_Rikenellaceae;g_Alistipes                     | 97.6_blast;93.90 iPhoP-RF;90.10 RaFAH;85.80               |
| S16_v6_75108  | Shared | n.a.          | n.a.          | n.a.          | n.a.               | n.a.         | n.a.           | n.a.         | 32.65_d_Bacteria;p_Firmicutes;c_Clostridia;o_Oscillospirales;f_Oscillospiraceae;g_UBA5446                    | 95_blast;96.50 CRSR;82.40 iPhoP-RF;65.30                  |
| S16_v6_78361  | Shared | Duplodnaviria | Heunggongvrae | Uroviricota   | Caudoviricetes     | n.a.         | Unclassified   | O            | 75.01_d_Bacteria;p_Actinobacteriata;c_Actinomycetia;o_Actinomycetales;f_Bifidobacteriaceae;g_Bifidobacterium | 98.3_CRSR;98.50 iPhoP-RF;97.10 blast;96.90                |
| S12_v6_12625  | Shared | Duplodnaviria | Heunggongvrae | Uroviricota   | Caudoviricetes     | n.a.         | Unclassified   | O            | 31.03_d_Bacteria;p_Bacteroidta;c_Bacteroidia;o_Bacteroidales;f_Rikenellaceae;g_Alistipes                     | 95.9_iPhoP-RF;97.10 blast;95.90                           |
| S16_v6_80244  | Shared | n.a.          | n.a.          | n.a.          | n.a.               | n.a.         | n.a.           | n.a.         | 99.97_d_Bacteria;p_Bacteroidta;c_Bacteroidia;o_Bacteroidales;f_Bacteroidaceae;g_Bacteroides                  | 99.7_iPhoP-RF;97.10 RaFAH;95.20 blast;89.20               |
| S16_v6_15093  | SHMC   | Duplodnaviria | Heunggongvrae | Uroviricota   | Caudoviricetes     | n.a.         | Unclassified   | O            | 19.11_d_Bacteria;p_Firmicutes;c_Clostridia;o_Christensenellales;f_CAG-74g_UBA11524                           | 99.6_CRSR;99.60 blast;96.60 iPhoP-RF;85.70                |
| S17_vf_174033 | Shared | Duplodnaviria | Heunggongvrae | Uroviricota   | Caudoviricetes     | n.a.         | Unclassified   | O            | 68.79_d_Bacteria;p_Firmicutes;c_Clostridia;o_Oscillospirales;f_Ruminococcaceae;g_Ruminococcus_D              | 99.7_iPhoP-RF;97.00 iPhoP-RF;95.40 RaFAH;94.60 CRSR;72.00 |
| S17_vf_31318  | ME     | Duplodnaviria | Heunggongvrae | Uroviricota   | Caudoviricetes     | n.a.         | Unclassified   | O            | 84.47_d_Bacteria;p_Bacteroidta;c_Bacteroidia;o_Bacteroidales;f_Barnesiellaceae;g_Barnesiella                 | 99.1_blast;96.90 RaFAH;88.80 CRSR;59.60                   |
| S17_vf_81232  | Shared | Duplodnaviria | Heunggongvrae | Uroviricota   | Caudoviricetes     | Crossvirales | Suolviridae    | Boorvirinae  | 50.04_d_Bacteria;p_Bacteroidta;c_Bacteroidia;o_Bacteroidales;f_Tannerellaceae;g_Parabacteroides              | 97.8_blast;98.40 iPhoP-RF;95.10 CRSR;83.70                |
| S12_v6_153780 | SHMC   | Duplodnaviria | Heunggongvrae | Uroviricota   | Caudoviricetes     | n.a.         | Unclassified   | Unclassified | 97.5_d_Bacteria;p_Proteobacteria;c_Alphaproteobacteria;p_RF321_f_CAG-239g_CAG-495                            | 90.9_blast;93.30 iPhoP-RF;81.60                           |
| S17_vf_97671  | ME     | Duplodnaviria | Heunggongvrae | Uroviricota   | Caudoviricetes     | n.a.         | Unclassified   | Unclassified | 81.31_d_Bacteria;p_Firmicutes;c_Clostridia;o_Oscillospirales;f_Oscillospiraceae;g_Lawsonibacter              | 90.2_blast;92.70 iPhoP-RF;73.20                           |
| S17_v6_103009 | Shared | n.a.          | n.a.          | n.a.          | n.a.               | n.a.         | n.a.           | n.a.         | 22.09_d_Bacteria;p_Firmicutes;c_Clostridia;o_Oscillospirales;f_Oscillospiraceae;g_ER4                        | 96.7_blast;97.00 iPhoP-RF;65.10                           |
| S12_v6_140456 | Shared | n.a.          | n.a.          | n.a.          | n.a.               | n.a.         | n.a.           | n.a.         | 11.8_d_Bacteria;p_Firmicutes;c_Clostridia;o_Oscillospirales;f_Oscillospiraceae;g_CAG-83                      | 95.9_blast;97.10 iPhoP-RF;72.60                           |
| S17_v6_116640 | ME     | Duplodnaviria | Heunggongvrae | Uroviricota   | Caudoviricetes     | n.a.         | Unclassified   | O            | 83.12_d_Bacteria;p_Bacteroidta;c_Bacteroidia;o_Bacteroidales;f_Bacteroidaceae;g_Bacteroides                  | 91_RaFAH;93.40                                            |
| S17_v6_127519 | Shared | n.a.          | n.a.          | n.a.          | n.a.               | n.a.         | n.a.           | n.a.         | 61.22_d_Bacteria;p_Firmicutes;c_Clostridia;o_Oscillospirales;f_Oscillospiraceae;g_Dysosmobacter              | 91.2_blast;93.60 iPhoP-RF;86.70                           |
| S17_v6_160502 | ME     | Duplodnaviria | Heunggongvrae | Uroviricota   | Caudoviricetes     | Crossvirales | Steigviridae   | O            | 60.44_d_Bacteria;p_Bacteroidta;c_Bacteroidia;o_Bacteroidales;f_Bacteroidaceae;g_Bacteroides                  | 99.9_iPhoP-RF;97.10 RaFAH;96.60 blast;92.60 CRSR;56.20    |
| S17_v6_177196 | ME     | n.a.          | n.a.          | n.a.          | n.a.               | n.a.         | n.a.           | n.a.         | 18.1_d_Bacteria;p_Bacteroidta;c_Bacteroidia;o_Bacteroidales;f_Rikenellaceae;g_Alistipes                      | 96.4_blast;95.90 iPhoP-RF;88.50 RaFAH;84.30               |
| S17_v6_20979  | Shared | Duplodnaviria | Heunggongvrae | Uroviricota   | Caudoviricetes     | n.a.         | Unclassified   | Unclassified | 67.97_d_Bacteria;p_Bacteroidta;c_Bacteroidia;o_Bacteroidales;f_Bacteroidaceae;g_Bacteroides                  | 100_RaFAH;98.50 iPhoP-RF;94.40 blast;92.60                |
| S17_v6_39515  | ME     | Duplodnaviria | Heunggongvrae | Uroviricota   | Caudoviricetes     | Crossvirales | Intestiviridae | O            | 82.52_d_Bacteria;p_Bacteroidta;c_Bacteroidia;o_Bacteroidales;f_Bacteroidaceae;g_Bacteroides                  | 100_RaFAH;99.30 iPhoP-RF;97.10 blast;92.90                |
| S17_v6_43307  | Shared | n.a.          | n.a.          | n.a.          | n.a.               | n.a.         | n.a.           | n.a.         | 72.14_d_Bacteria;p_Bacteroidta;c_Bacteroidia;o_Bacteroidales;f_Tannerellaceae;g_Parabacteroides              | 95.4_blast;96.80 CRSR;96.70 iPhoP-RF;93.40                |
| S1_vf_158961  | ME     | Duplodnaviria | Heunggongvrae | Uroviricota   | Caudoviricetes     | n.a.         | Unclassified   | O            | 9.7_d_Bacteria;p_Firmicutes;c_Clostridia;o_Christensenellales;f_CAG-74g_UBA11524                             | 95_blast;96.00 iPhoP-RF;77.30                             |
| S1_vf_159951  | ME     | Duplodnaviria | Heunggongvrae | Uroviricota   | Caudoviricetes     | n.a.         | Unclassified   | O            | 22.14_d_Bacteria;p_Bacteroidta;c_Bacteroidia;o_Bacteroidales;f_Rikenellaceae;g_Alistipes                     | 95.4_CRSR;96.80 iPhoP-RF;72.20                            |
| S1_vf_22149   | ME     | n.a.          | n.a.          | n.a.          | n.a.               | n.a.         | n.a.           | n.a.         | 43.65_d_Bacteria;p_Firmicutes;c_Clostridia;o_Oscillospirales;f_Oscillospiraceae;g_ER4                        | 90.8_blast;93.20 iPhoP-RF;69.60                           |
| S1_v6_143929  | ME     | n.a.          | n.a.          | n.a.          | n.a.               | n.a.         | n.a.           | n.a.         | 42.31_d_Bacteria;p_Firmicutes;c_Clostridia;o_Oscillospirales;f_Oscillospiraceae;g_ER4                        | 91.6_blast;93.90 iPhoP-RF;75.00                           |
| S2_vf_20910   | SHMC   | n.a.          | n.a.          | n.a.          | n.a.               | n.a.         | n.a.           | n.a.         | 5.26_d_Bacteria;p_Firmicutes;c_Bacilli;o_Erysipelotrichales;f_Erysipelotrichaceae;g_Clostridium_AQ           | 97.2_CRSR;98.00                                           |
| S12_v6_1980   | Shared | Duplodnaviria | Heunggongvrae | Uroviricota   | Caudoviricetes     | n.a.         | Unclassified   | O            | 94.44_d_Bacteria;p_Bacteroidta;c_Bacteroidia;o_Bacteroidales;f_Bacteroidaceae;g_Bacteroides                  | 99.1_iPhoP-RF;97.10 blast;93.60 RaFAH;87.80 CRSR;58.50    |
| S2_v6_10289   | Shared | Duplodnaviria | Heunggongvrae | Uroviricota   | Caudoviricetes     | n.a.         | Unclassified   | Unclassified | 67.97_d_Bacteria;p_Bacteroidta;c_Bacteroidia;o_Bacteroidales;f_Bacteroidaceae;g_Bacteroides                  | 100_RaFAH;98.90 blast;96.80 iPhoP-RF;87.90                |
| S2_v6_7386    | Shared | Duplodnaviria | Heunggongvrae | Uroviricota   | Caudoviricetes     | n.a.         | Unclassified   | Unclassified | 96.01_d_Bacteria;p_Bacteroidta;c_Bacteroidia;o_Bacteroidales;f_Tannerellaceae;g_Parabacteroides              | 93_blast;95.00 iPhoP-RF;93.70                             |
| S3_vf_100440  | ME     | Duplodnaviria | Heunggongvrae | Uroviricota   | Caudoviricetes     | n.a.         | Unclassified   | O            | 8.85_d_Bacteria;p_Firmicutes;c_Clostridia;o_Clostriales;f_Clostridiaceae;g_Clostridium                       | 94.7_RaFAH;96.30                                          |
| S3_vf_106401  | ME     | Duplodnaviria | Heunggongvrae | Uroviricota   | Caudoviricetes     | n.a.         | Unclassified   | O            | 12.56_d_Bacteria;p_Firmicutes;c_Bacilli;o_Haloplasmales;f_Turicibacteraceae;g_Turicibacter                   | 92_blast;94.50 iPhoP-RF;66.30                             |
| S12_v6_26847  | SHMC   | n.a.          | n.a.          | n.a.          | n.a.               | n.a.         | n.a.           | n.a.         | 68.45_d_Bacteria;p_Firmicutes;c_Clostridia;o_Lachnospirales;f_Lachnospiraceae;g_Lachnospira                  | 99.3_CRSR;98.90 iPhoP-RF;95.70 blast;94.10 RaFAH;74.50    |
| S3_vf_115304  | Shared | Duplodnaviria | Heunggongvrae | Uroviricota   | Caudoviricetes     | Crossvirales | Suolviridae    | Uncovirinae  | 34.34_d_Bacteria;p_Spirochaetota;c_Spirochaetia;o_Sphaerochaetales;f_Sphaerochaetaceae;g_UBA9732             | 91.2_blast;93.60 iPhoP-RF;81.90                           |
| S3_vf_127799  | Shared | Duplodnaviria | Heunggongvrae | Uroviricota   | Caudoviricetes     | n.a.         | Unclassified   | O            | 23.09_d_Bacteria;p_Bacteroidta;c_Bacteroidia;o_Bacteroidales;f_Bacteroidaceae;g_Bacteroides                  | 90.4_RaFAH;92.90                                          |
| S12_v6_32469  | SHMC   | n.a.          | n.a.          | n.a.          | n.a.               | n.a.         | n.a.           | n.a.         | 1.93_d_Bacteria;p_Firmicutes;c_Clostridia;o_Christensenellales;f_CAG-917g_CAG-475                            | 94.7_blast;96.30 iPhoP-RF;66.60                           |
| S3_vf_127405  | ME     | Duplodnaviria | Heunggongvrae | Uroviricota   | Caudoviricetes     | n.a.         | Unclassified   | O            | 98.09_d_Bacteria;p_Firmicutes;c_Clostridia;o_Lachnospirales;f_Lachnospiraceae;g_Lachnospira                  | 99.7_CRSR;98.90 RaFAH;93.10 iPhoP-RF;90.80 blast;80.40    |
| S3_vf_127406  | ME     | Duplodnaviria | Heunggongvrae | Uroviricota   | Caudoviricetes     | n.a.         | Unclassified   | Unclassified | 89.48_d_Bacteria;p_Bacteroidta;c_Bacteroidia;o_Bacteroidales;f_Rikenellaceae;g_Alistipes                     | 97.8_RaFAH;98.40                                          |
| S3_vf_127409  | Shared | Duplodnaviria | Heunggongvrae | Uroviricota   | Caudoviricetes     | n.a.         | Unclassified   | O            | 96.84_d_Bacteria;p_Firmicutes;c_Clostridia;o_Oscillospirales;f_Ruminococcaceae;g_Faecalibacterium            | 95.9_CRSR;97.00 blast;95.70 iPhoP-RF;81.10 RaFAH;51.90    |
| S3_vf_18080   | ME     | n.a.          | n.a.          | n.a.          | n.a.               | n.a.         | n.a.           | n.a.         | 96.93_d_Bacteria;p_Bacteroidta;c_Bacteroidia;o_Bacteroidales;f_Bacteroidaceae;g_Bacteroides                  | 99.7_iPhoP-RF;97.10 iPhoP-RF;95.40 RaFAH;94.50 CRSR;81.40 |
| S3_vf_18829   | ME     | Duplodnaviria | Heunggongvrae | Uroviricota   | Caudoviricetes     | n.a.         | Unclassified   | Unclassified | 63.94_d_Bacteria;p_Bacteroidta;c_Bacteroidia;o_Bacteroidales;f_Bacteroidaceae;g_Bacteroides                  | 91.8_iPhoP-RF;94.10 CRSR;73.10                            |
| S3_vf_44405   | Shared | Duplodnaviria | Heunggongvrae | Uroviricota   | Caudoviricetes     | n.a.         | Unclassified   | Unclassified | 96.43_d_Bacteria;p_Actinobacteriata;c_Actinomycetia;o_Actinomycetales;f_Actinomycetaceae;g_Actinomycetes     | 100_RaFAH;97.30 CRSR;92.40 blast;92.10 iPhoP-RF;55.70     |
| S3_vf_54353   | ME     | Duplodnaviria | Heunggongvrae | Uroviricota   | Caudoviricetes     | n.a.         | Unclassified   | Unclassified | 46.9_d_Bacteria;p_Actinobacteriata;c_Actinomycetia;o_Actinomycetales;f_Actinomycetaceae;g_Actinomycetes      | 97.8_RaFAH;97.30 iPhoP-RF;70.60                           |
| S3_vf_67333   | ME     | Duplodnaviria | Heunggongvrae | Uroviricota   | Caudoviricetes     | n.a.         | Unclassified   | O            | 76.26_d_Bacteria;p_Firmicutes;c_Clostridia;o_Lachnospirales;f_Lachnospiraceae;g_Agathobacter                 | 99.9_CRSR;98.90 RaFAH;90.80 blast;85.70 iPhoP-RF;81.90    |
| S12_v6_74280  | Shared | n.a.          | n.a.          | n.a.          | n.a.               | n.a.         | n.a.           | n.a.         | 14.1_d_Bacteria;p_Bacteroidta;c_Bacteroidia;o_Bacteroidales;f_Marinifilaceae;g_Butyrimonas                   | 94.3_blast;96.00 iPhoP-RF;58.40                           |
| S3_vf_67823   | Shared | Duplodnaviria | Sangerivrae   | Phinoviricota | Petivirales        | n.a.         | Unclassified   | Unclassified | 42_d_Bacteria;p_Bacteroidta;c_Bacteroidia;o_Bacteroidales;f_Rikenellaceae;g_Alistipes                        | 91.5_blast;93.80 iPhoP-RF;64.50                           |
| S3_vf_108959  | ME     | n.a.          | n.a.          | n.a.          | n.a.               | n.a.         | n.a.           | n.a.         | 42.95_d_Bacteria;p_Firmicutes;c_Clostridia;o_Lachnospirales;f_Lachnospiraceae;g_Lachnospira                  | 99.3_CRSR;99.30 blast;91.90 iPhoP-RF;88.90 RaFAH;55.00    |
| S3_vf_70746   | Shared | Duplodnaviria | Heunggongvrae | Uroviricota   | Caudoviricetes     | n.a.         | Unclassified   | Unclassified | 87.64_d_Bacteria;p_Actinobacteriata;c_Actinomycetia;o_Actinomycetales;f_Bifidobacteriaceae;g_Bifidobacterium | 95.3_iPhoP-RF;96.70 iPhoP-RF;95.90 CRSR;78.50             |
| S12_v6_81729  | SHMC   | Duplodnaviria | Heunggongvrae | Uroviricota   | Caudoviricetes     | n.a.         | Unclassified   | O            | 10.77_d_Bacteria;p_Firmicutes;c_Clostridia;o_Oscillospirales;f_Ruminococcaceae;g_Faecalibacterium            | 97.3_CRSR;98.10 iPhoP-RF;93.40 blast;92.10                |
| S3_vf_73597   | ME     | Duplodnaviria | Heunggongvrae | Uroviricota   | Caudoviricetes     | n.a.         | Unclassified   | O            | 55.3_d_Bacteria;p_Bacteroidta;c_Bacteroidia;o_Bacteroidales;f_Bacteroidaceae;g_Bacteroides                   | 99.3_CRSR;97.20 iPhoP-RF;97.10 RaFAH;93.80 blast;93.80    |
| S3_vf_80287   | Shared | Duplodnaviria | Heunggongvrae | Uroviricota   | Caudoviricetes     | n.a.         | Unclassified   | O            | 52.73_d_Bacteria;p_Firmicutes;c_Clostridia;o_Oscillospirales;f_Ruminococcaceae;g_D5                          | 97.2_CRSR;98.00 iPhoP-RF;52.20                            |
| S3_vf_8058    | ME     | Duplodnaviria | Heunggongvrae | Uroviricota   | Caudoviricetes     | n.a.         | Unclassified   | Unclassified | 98.11_d_Bacteria;p_Firmicutes;c_Clostridia;o_Lachnospirales;f_Lachnospiraceae;g_Blaustia_A                   | 98.1_CRSR;98.60 iPhoP-RF;81.60                            |
| S12_v6_87088  | Shared | Duplodnaviria | Heunggongvrae | Uroviricota   | Caudoviricetes     | n.a.         | Unclassified   | O            | 36.55_d_Bacteria;p_Firmicutes;c_Clostridia;o_Oscillospirales;f_Ruminococcaceae;g_Faecalibacterium            | 97.5_blast;96.60 iPhoP-RF;92.40 RaFAH;73.80 CRSR;53.50    |
| S3_vf_82571   | Shared | Duplodnaviria | Heunggongvrae | Uroviricota   | Caudoviricetes     | n.a.         | Unclassified   | O            | 21.78_d_Bacteria;p_Firmicutes;c_Clostridia;o_Oscillospirales;f_Oscillospiraceae;g_CAG-170                    | 93.1_blast;95.10 iPhoP-RF;73.20                           |
| S3_vf_99734   | Shared | Duplodnaviria | Heunggongvrae | Uroviricota   | Caudoviricetes     | n.a.         | Unclassified   | Unclassified | 99.18_d_Bacteria;p_Firmicutes;c_Clostridia;o_Oscillospirales;f_Ruminococcaceae;g_Faecalibacterium            | 95.2_CRSR;96.60 iPhoP-RF;64.80 blast;60.50                |
| S3_vf_142171  | ME     | n.a.          | n.a.          | n.a.          | n.a.               | n.a.         | n.a.           | n.a.         | 19.01_d_Bacteria;p_Firmicutes;c_Clostridia;o_Christensenellales;f_Actinobacteriaceae;g_Actinobacter          | 92.1_blast;94.30 iPhoP-RF;66.80                           |
| S12_v6_94042  | Shared | n.a.          | n.a.          | n.a.          | n.a.               | n.a.         | n.a.           | n.a.         | 8.07_d_Bacteria;p_Firmicutes;c_Clostridia;o_Christensenellales;f_CAG-74g_UBA11524                            | 95.5_blast;96.90 iPhoP-RF;91.80                           |
| S3_v6_117894  | Shared | n.a.          | n.a.          | n.a.          | n.a.               | n.a.         | n.a.           | n.a.         | 81.25_d_Bacteria;p_Bacteroidta;c_Bacteroidia;o_Bacteroidales;f_Marinifilaceae;g_Odoribacter                  | 99.9_blast;98.40 iPhoP-RF;93.10 RaFAH;92.30 CRSR;53.10    |
| S12_v6_98175  | SHMC   | Duplodnaviria | Heunggongvrae | Uroviricota   | Caudoviricetes     | n.a.         | Unclassified   | O            | 95.22_d_Bacteria;p_Firmicutes;c_Clostridia;o_Lachnospirales;f_Lachnospiraceae;g_Bariatricus                  | 90.3_iPhoP-RF;89.50 blast;81.30 RaFAH;65.60               |
| S3_v6_119660  | Shared | Duplodnaviria | Heunggongvrae | Uroviricota   | Caudoviricetes     | n.a.         | Unclassified   | Unclassified | 91.3_d_Bacteria;p_Bacteroidta;c_Bacteroidia;o_Bacteroidales;f_Bacteroidaceae;g_Bacteroides                   | 100_RaFAH;98.50 CRSR;95.40 iPhoP-RF;95.40 blast;93.90     |
| S3_v6_123834  | Shared | Duplodnaviria | Heunggongvrae | Uroviricota   | Caudoviricetes     | n.a.         | Unclassified   | O            | 73.11_d_Bacteria;p_Actinobacteriata;c_Actinomycetia;o_Actinomycetales;f_Bifidobacteriaceae;g_Bifidobacterium | 98.4_CRSR;98.40 blast;96.90 iPhoP-RF;96.70 RaFAH;61.70    |
| S12_v6_99219  | Shared | n.a.          | n.a.          | n.a.          | n.a.               | n.a.         | n.a.           | n.a.         | 99.93_d_Bacteria;p_Bacteroidta;c_Bacteroidia;o_Bacteroidales;f_Bacteroidaceae;g_Bacteroides                  | 100_RaFAH;98.90 iPhoP-RF;96.70 blast;91.60                |
| S3_v6_127391  | ME     | n.a.          | n.a.          | n.a.          | n.a.               | n.a.         | n.a.           | n.a.         | 18.32_d_Bacteria;p_Firmicutes;c_Clostridia;o_Oscillospirales;f_Ruminococcaceae;g_Gemmiger                    | 95.6_blast;96.90 CRSR;96.30 iPhoP-RF;91.80                |
| S3_v6_127413  | ME     | Duplodnaviria | Heunggongvrae | Uroviricota   | Caudoviricetes     | n.a.         | Unclassified   | O            | 23.82_d_Bacteria;p_Bacteroidta;c_Bacteroidia;o_Bacteroidales;f_Rikenellaceae;g_Alistipes                     | 97.9_CRSR;98.50 iPhoP-RF;80.00                            |
| S3_v6_127442  | ME     | Monodnaviria  | Sangerivrae   | Phinoviricota | Malgrandaviricetes | Petivirales  | Microviridae   | Unclassified | d_Bacteria;p_Bacteroidta;c_Bacteroidia;o_Bacteroidales;f_P3g_Phl12                                           | 90.7_iPhoP-RF;93.10                                       |
| S3_v6_17168   | Shared | Duplodnaviria | Heunggongvrae | Uroviricota   | Caudoviricetes     | n.a.         | Unclassified   | O            | 100_d_Bacteria;p_Bacteroidta;c_Bacteroidia;o_Bacteroidales;f_Rikenellaceae;g_Alistipes                       | 97.5_blast;96.90 iPhoP-RF;93.10 RaFAH;71.20               |
| S3_v6_18858   | ME     | n.a.          | n.a.          | n.a.          | n.a.               | n.a.         | n.a.           | n.a.         | 82.07_d_Bacteria;p_Firmicutes;c_Clostridia;o_Oscillospirales;f_Actinobacteriaceae;g_CAG-217                  | 97.2_blast;96.50 iPhoP-RF;86.30 CRSR;68.70                |
| S3_v6_29077   | ME     | Duplodnaviria | Heunggongvrae | Uroviricota   | Caudoviricetes     | n.a.         | Unclassified   | O            | 34.15_d_Bacteria;p_Firmicutes;c_Clostridia;o_Oscillospirales;f_Ruminococcaceae;g_Ruminococcus_C              | 94.9_blast;96.40 iPhoP-RF;80.00 CRSR;51.40                |
| S13_vf_147589 | ME     | n.a.          | n.a.          | n.a.          | n.a.               | n.a.         | n.a.           | n.a.         | 6.46_d_Bacteria;p_Firmicutes;c_Clostridia;o_Oscillospirales;f_Oscillospiraceae;g_Flavonifractor              | 91.5_blast;93.80 iPhoP-RF;78.50                           |
| S3_v6_42569   | ME     | Duplodnaviria | Heunggongvrae | Uroviricota   | Caudoviricetes     | n.a.         | Unclassified   | Unclassified | 73.75_d_Bacteria;p_Firmicutes;c_Clostridia;o_Oscillospirales;f_Ruminococcaceae;g_Faecalibacterium            | 99.7_CRSR;98.30 blast;96.90 RaFAH;90.40 iPhoP-RF;73.70    |
| S3_v6_45147   | ME     | n.a.          | n.a.          | n.a.          | n.a.               | n.a.         | n.a.           | n.a.         | 90.75_d_Bacteria;p_Bacteroidta;c_Bacteroidia;o_Bacteroidales;f_Bacteroidaceae;g_Bacteroides                  | 99.4_iPhoP-RF;97.10 RaFAH;91.20                           |
| S3_v6_49816   | ME     | n.a.          | n.a.          | n.a.          | n.a.               | n.a.         | n.a.           | n.a.         | 13.1_d_Bacteria;p_Firmicutes;c_Clostridia;o_Oscillospirales;f_Actinobacteriaceae;g_Ruminococcus_E            | 90_CRSR;99.20 iPhoP-RF;95.60 iPhoP-RF;93.10               |
| S3_v6_50924   | ME     | n.a.          | n.a.          | n.a.          | n.a.               | n.a.         | n.a.           | n.a.         | 12.69_d_Bacteria;p_Cyanobacteria;c_Vampirobionta;o_Gastreaerophilales;f_Gastreaerophilaceae;g_QAM01          | 90.4_blast;92.00 iPhoP-RF;57.10                           |
| S3_v6_54303   | Shared | Duplodnaviria | Heunggongvrae | Uroviricota   | Caudoviricetes     | n.a.         | Unclassified   | Unclassified | 46.83_d_Bacteria;p_Firmicutes;c_Clostridia;o_Oscillospirales;f_Oscillospiraceae;g_                           | 91.6_blast;93.90 iPhoP-RF;80.30                           |
| S3_v6_64424   | Shared | n.a.          | n.a.          | n.a.          | n.a.               | n.a.         | n.a.           | n.a.         | 98.41_d_Bacteria;p_Bacteroidta;c_Bacteroidia;o_Bacteroidales;f_Bacteroidaceae;g_Bacteroides                  | 100_RaFAH;99.60 iPhoP-RF;97.10 blast;92.20 CRSR;69.50     |
| S3_v6_70508   | Shared | n.a.          | n.a.          |               |                    |              |                |              |                                                                                                              |                                                           |

|                               |        |               |                  |             |                |      |                |                |              |                                                                                                                |             |                |                |                |                |
|-------------------------------|--------|---------------|------------------|-------------|----------------|------|----------------|----------------|--------------|----------------------------------------------------------------------------------------------------------------|-------------|----------------|----------------|----------------|----------------|
| S3_vt_68031                   | ME     | Duplodnaviria | Heunggongvirae   | Uroviricota | Caudoviricetes | n.a. | Unclassified   | O              | O            | 27.92_d_Bacteria_p_Firmicutes_c_Clostridia_o_Oscillospirales_f_Ruminococcaceae_g_Faecalibacterium              | 95.6        | blast:96.90    | IPhOP-RF:73.20 | CRISPR:56.90   |                |
| S4_vt_VIRSorter_12831-SHNC    |        | Duplodnaviria | Heunggongvirae   | Uroviricota | Caudoviricetes | n.a. | Unclassified   | O              | O            | 21.81_d_Bacteria_p_Firmicutes_c_Clostridia_o_Lachnospirales_f_Lachnospiraceae_g_Blaustia_A                     | 91.6        | blast:93.90    | IPhOP-RF:85.10 | CRISPR:58.50   |                |
| S4_vt_VIRSorter_13130-SHNC    | Shared | Duplodnaviria | Heunggongvirae   | Uroviricota | Caudoviricetes | n.a. | Unclassified   | O              | O            | 96.31_d_Bacteria_p_Firmicutes_c_Bacteroidia_o_Bacteroidales_f_Tannerellaceae_g_Parabacteroides                 | 100         | RafAH:99.80    | IPhOP-RF:94.40 | blast:91.20    | CRISPR:66.50   |
| S4_vt_VIRSorter_15112-SHNC    |        | Duplodnaviria | Heunggongvirae   | Uroviricota | Caudoviricetes | n.a. | Unclassified   | O              | n.a.         | 16.47_d_Bacteria_p_Firmicutes_c_Clostridia_o_Peptostreptococcales_f_GCA-900066495                              | 91.6        | blast:93.90    | IPhOP-RF:75.70 |                |                |
| S4_vt_VIRSorter_15837-Shared  |        | Duplodnaviria | Heunggongvirae   | Uroviricota | Caudoviricetes | n.a. | Unclassified   | O              | O            | 96.3_d_Bacteria_p_Firmicutes_c_Clostridia_o_Oscillospirales_f_Oscillospiraceae_g_Flavonifractor                | 97.2        | blast:98.00    | CRISPR:89.70   | IPhOP-RF:84.80 |                |
| S4_vt_VIRSorter_16493-Shared  |        | Duplodnaviria | Heunggongvirae   | Uroviricota | Caudoviricetes | n.a. | Unclassified   | Unclassified   | Unclassified | 85.89_d_Bacteria_p_Actinobacteriota_c_Actinomycetia_o_Actinomycetiales_f_Bifidobacteriaceae_g_Bifidobacterium  | 97.9        | CRISPR:98.50   | IPhOP-RF:96.40 | blast:92.50    |                |
| S4_vt_VIRSorter_19324-SHNC    |        | Duplodnaviria | Heunggongvirae   | Uroviricota | Caudoviricetes | n.a. | Unclassified   | O              | O            | 25.86_d_Bacteria_p_Firmicutes_c_Clostridia_o_Lachnospirales_f_Lachnospiraceae_g_Mediterraneibacter             | 91.4        | blast:93.70    | IPhOP-RF:76.40 |                |                |
| S4_vt_VIRSorter_3006-c-Shared |        | Duplodnaviria | Heunggongvirae   | Uroviricota | Caudoviricetes | n.a. | Unclassified   | O              | O            | 99.88_d_Bacteria_p_Firmicutes_c_Clostridia_o_Lachnospirales_f_Lachnospiraceae_g_Mediterraneibacter             | 91.6        | blast:93.90    |                |                |                |
| S4_vt_VIRSorter_30222-Shared  |        | Duplodnaviria | Heunggongvirae   | Uroviricota | Caudoviricetes | n.a. | Unclassified   | O              | n.a.         | 65.63_d_Bacteria_p_Firmicutes_c_Clostridia_o_Oscillospirales_f_Oscillospiraceae_g_Intestimonas                 | 91.5        | blast:93.80    |                |                |                |
| S4_vt_VIRSorter_31171-SHNC    |        | Duplodnaviria | Heunggongvirae   | Uroviricota | Caudoviricetes | n.a. | Unclassified   | O              | O            | 46.28_d_Bacteria_p_Firmicutes_c_Clostridia_o_Oscillospirales_f_Ruminococcaceae_g_QAMM01                        | 90.2        | blast:92.70    | IPhOP-RF:54.90 |                |                |
| S4_vt_VIRSorter_31196-Shared  |        | n.a.          | n.a.             | n.a.        | n.a.           | n.a. | n.a.           | n.a.           | n.a.         | 93.39_d_Bacteria_p_Firmicutes_c_Clostridia_o_Oscillospirales_f_Oscillospiraceae_g_Flavonifractor               | 99.4        | CRISPR:97.90   | blast:96.20    | IPhOP-RF:88.90 | RafAH:87.70    |
| S13_vt_45488                  | Shared | Duplodnaviria | Heunggongvirae   | Uroviricota | Caudoviricetes | n.a. | Unclassified   | O              | O            | 22.02_d_Bacteria_p_Proteobacteria_c_Alphaproteobacteria_o_RF32_f_CAG-239_g_51-20                               | 97.9        | CRISPR:98.50   | blast:79.90    | IPhOP-RF:74.60 |                |
| S4_vt_VIRSorter_31590-Shared  |        | Duplodnaviria | Heunggongvirae   | Uroviricota | Caudoviricetes | n.a. | Unclassified   | O              | O            | 59.79_d_Bacteria_p_Firmicutes_c_Clostridia_o_Oscillospirales_f_Oscillospiraceae_g_Flavonifractor               | 90.3        | blast:92.80    | IPhOP-RF:86.30 | CRISPR:64.80   |                |
| S4_vt_VIRSorter_31976-Shared  |        | Duplodnaviria | Heunggongvirae   | Uroviricota | Caudoviricetes | n.a. | Unclassified   | O              | n.a.         | 17.17_d_Bacteria_p_Firmicutes_c_Clostridia_o_Oscillospirales_f_Ruminococcaceae_g_Gemmiger                      | 97.2        | CRISPR:98.00   | blast:96.20    | IPhOP-RF:93.70 |                |
| S13_vt_57267                  | Shared | Duplodnaviria | Heunggongvirae   | Uroviricota | Caudoviricetes | n.a. | Unclassified   | O              | O            | 38.42_d_Bacteria_p_Bacteroidota_c_Bacteroidia_o_Bacteroidales_f_Bacteroidaceae_g_Prevotella                    | 90.6        | RafAH:93.00    |                |                |                |
| S4_vt_VIRSorter_31980-SHNC    |        | Duplodnaviria | Heunggongvirae   | Uroviricota | Caudoviricetes | n.a. | Unclassified   | Unclassified   | Unclassified | 13.26_d_Bacteria_p_Proteobacteria_c_Gammaproteobacteria_o_Burkholderiales_f_Burkholderiaceae_g_Duodenibacillus | 96.7        | blast:97.70    | CRISPR:83.90   | IPhOP-RF:70.60 |                |
| S4_vt_VIRSorter_4746-c-Shared |        | Duplodnaviria | Heunggongvirae   | Uroviricota | Caudoviricetes | n.a. | Unclassified   | Salasamviridae | O            | 5.45_d_Bacteria_p_Firmicutes_c_Clostridia_o_Lachnospirales_f_Lachnospiraceae_g_Roseburia                       | 90.3        | IPhOP-RF:92.80 |                |                |                |
| S4_vt_VIRSorter_4839-c-SHNC   |        | Duplodnaviria | Heunggongvirae   | Uroviricota | Caudoviricetes | n.a. | Unclassified   | O              | O            | 69.64_d_Bacteria_p_Firmicutes_c_Clostridia_o_Oscillospirales_f_Ruminococcaceae_g_Massiliimallae                | 91.4        | blast:93.70    | IPhOP-RF:75.70 |                |                |
| S4_vt_VIRSorter_4959-c-Shared |        | Duplodnaviria | Heunggongvirae   | Uroviricota | Caudoviricetes | n.a. | Unclassified   | O              | O            | 50.34_d_Bacteria_p_Firmicutes_c_Clostridia_o_Oscillospirales_f_Oscillospiraceae_g_EHA                          | 94.2        | blast:95.50    | IPhOP-RF:60.50 |                |                |
| S4_vt_VIRSorter_6022-c-Shared |        | Duplodnaviria | Heunggongvirae   | Uroviricota | Caudoviricetes | n.a. | Unclassified   | Unclassified   | Unclassified | 97.71_d_Bacteria_p_Bacteroidota_c_Bacteroidia_o_Bacteroidales_f_Tannerellaceae_g_Marseillea_P3160              | 98.4        | CRISPR:98.80   | IPhOP-RF:65.30 |                |                |
| S4_vt_VIRSorter_9913-c-Shared |        | Duplodnaviria | Heunggongvirae   | Uroviricota | Caudoviricetes | n.a. | Unclassified   | Unclassified   | Unclassified | 98.3_d_Bacteria_p_Bacteroidota_c_Bacteroidia_o_Bacteroidales_f_Marinifilaceae_g_Odoribacter                    | 99.7        | CRISPR:97.90   | RafAH:92.60    |                |                |
| S5_vt_31973                   | Shared | n.a.          | n.a.             | n.a.        | n.a.           | n.a. | n.a.           | n.a.           | n.a.         | 23.92_d_Bacteria_p_Patescibacteria_c_Paceibacteriia_o_UBA983_Af_FUBA1006_g_01-FULL-36-10b                      | 92.2        | IPhOP-RF:94.40 |                |                |                |
| S5_vt_130400                  | Shared | n.a.          | Heunggongvirae   | Uroviricota | Caudoviricetes | n.a. | Unclassified   | Unclassified   | Mushuvirus   | 100                                                                                                            | RafAH:98.80 | blast:96.50    | IPhOP-RF:69.10 |                |                |
| S5_vt_130676                  | Shared | n.a.          | n.a.             | n.a.        | n.a.           | n.a. | n.a.           | n.a.           | n.a.         | 41.14_d_Bacteria_p_Firmicutes_c_Clostridia_o_Oscillospirales_f_Ruminococcaceae_g_EHA                           | 91          | blast:95.00    | IPhOP-RF:69.80 |                |                |
| S5_vt_137260                  | Shared | Unclassified  | n.a.             | n.a.        | n.a.           | n.a. | Unclassified   | O              | O            | 6.74_d_Bacteria_p_Actinobacteriota_c_Coribacteriia_o_Coribacteriales_f_Coribacteriaceae_g_Collinsella          | 92.9        | CRISPR:94.90   |                |                |                |
| S5_vt_145585                  | Shared | Duplodnaviria | Heunggongvirae   | Uroviricota | Caudoviricetes | n.a. | Unclassified   | Unclassified   | Unclassified | 9.85_d_Bacteria_p_Firmicutes_c_Clostridia_o_Oscillospirales_f_Lachnospiraceae_g_Enterocloster                  | 91.2        | blast:93.60    | IPhOP-RF:91.40 | CRISPR:53.80   |                |
| S14_vt_115736                 | ME     | Duplodnaviria | Heunggongvirae   | Uroviricota | Caudoviricetes | n.a. | Unclassified   | Unclassified   | O            | 85.01_d_Bacteria_p_Firmicutes_c_Clostridia_o_Oscillospirales_f_Oscillospiraceae_g_Flavonifractor               | 91.2        | blast:93.60    | IPhOP-RF:89.80 | CRISPR:61.00   |                |
| S5_vt_145588                  | Shared | Duplodnaviria | Heunggongvirae   | Uroviricota | Caudoviricetes | n.a. | Unclassified   | O              | O            | 34.8_d_Bacteria_p_Firmicutes_c_Clostridia_o_Lachnospirales_f_Lachnospiraceae_g_Dorea_A                         | 97.2        | CRISPR:98.00   | IPhOP-RF:64.30 |                |                |
| S14_vt_117147                 | Shared | Duplodnaviria | Heunggongvirae   | Uroviricota | Caudoviricetes | n.a. | Unclassified   | O              | O            | 30.35_d_Bacteria_p_Firmicutes_c_Clostridia_o_Oscillospirales_f_Lachnospiraceae_g_Gemmiger                      | 95.2        | blast:96.70    | CRISPR:94.60   | IPhOP-RF:86.30 |                |
| S5_vt_18461                   | Shared | Duplodnaviria | Heunggongvirae   | Uroviricota | Caudoviricetes | n.a. | Unclassified   | O              | O            | 99.96_d_Bacteria_p_Bacteroidota_c_Bacteroidia_o_Bacteroidales_f_Rikenellaceae_g_Alistipes                      | 92.7        | RafAH:92.00    | blast:67.20    |                |                |
| S5_vt_25423                   | Shared | Duplodnaviria | Heunggongvirae   | Uroviricota | Caudoviricetes | n.a. | Unclassified   | Unclassified   | Skunuvirus   | 81                                                                                                             | RafAH:98.80 | blast:98.50    | IPhOP-RF:91.40 |                |                |
| S14_vt_117155                 | Shared | Duplodnaviria | Heunggongvirae   | Uroviricota | Caudoviricetes | n.a. | Unclassified   | O              | O            | 63.17_d_Bacteria_p_Actinobacteriota_c_Actinomycetia_o_Actinomycetiales_f_Actinomycetaceae_g_Pauljensenia       | 98.4        | RafAH:94.80    | CRISPR:83.10   | IPhOP-RF:64.80 |                |
| S5_vt_28061                   | ME     | n.a.          | n.a.             | n.a.        | n.a.           | n.a. | n.a.           | n.a.           | n.a.         | 20.02_d_Bacteria_p_Firmicutes_c_Bacilli_o_Haloplasmales_Af_Turicibacteraceae_g_Turicibacter                    | 91.5        | blast:93.80    | IPhOP-RF:68.60 |                |                |
| S5_vt_6509                    | ME     | Duplodnaviria | Heunggongvirae   | Uroviricota | Caudoviricetes | n.a. | Unclassified   | O              | O            | 20.08_d_Bacteria_p_Firmicutes_c_Clostridia_o_Clostriales_f_Clostridiaceae_g_Clostridium_J                      | 90.3        | blast:92.80    | IPhOP-RF:67.70 |                |                |
| S14_vt_117162                 | ME     | Duplodnaviria | Heunggongvirae   | Uroviricota | Caudoviricetes | n.a. | Unclassified   | Unclassified   | Unclassified | 23.32_d_Bacteria_p_Bacteroidota_c_Bacteroidia_o_Bacteroidales_f_Bacteroidaceae_g_Prevotella                    | 94          | RafAH:90.00    | IPhOP-RF:70.90 | CRISPR:63.50   |                |
| S5_vt_74661                   | ME     | Duplodnaviria | Heunggongvirae   | Uroviricota | Caudoviricetes | n.a. | Unclassified   | Unclassified   | Unclassified | 91.73_d_Bacteria_p_Proteobacteria_c_Gammaproteobacteria_o_Enterobacteriales_f_Enterobacteriaceae_g_Escherichia | 100         | RafAH:99.40    | IPhOP-RF:97.10 | blast:96.80    | CRISPR:85.00   |
| S5_vt_8965                    | ME     | Duplodnaviria | Heunggongvirae   | Uroviricota | Caudoviricetes | n.a. | Unclassified   | O              | O            | 100                                                                                                            | RafAH:99.60 | IPhOP-RF:97.10 | blast:96.30    |                |                |
| S5_vt_107105                  | ME     | Duplodnaviria | Heunggongvirae   | Uroviricota | Caudoviricetes | n.a. | Unclassified   | O              | O            | 21.85_d_Bacteria_p_Firmicutes_c_Clostridia_o_Oscillospirales_f_Oscillospiraceae_g_CAG-110                      | 94.7        | blast:96.30    | IPhOP-RF:67.00 |                |                |
| S5_vt_120079                  | ME     | Duplodnaviria | Heunggongvirae   | Uroviricota | Caudoviricetes | n.a. | Unclassified   | Unclassified   | Unclassified | 88.37_d_Bacteria_p_Firmicutes_c_Clostridia_o_Lachnospirales_f_Lachnospiraceae_g_Roseburia                      | 95.3        | blast:96.70    | IPhOP-RF:96.40 | CRISPR:84.10   |                |
| S4_vt_VIRSorter_31975-Shared  |        | Duplodnaviria | Heunggongvirae   | Uroviricota | Caudoviricetes | n.a. | Unclassified   | O              | O            | 99.3_d_Bacteria_p_Firmicutes_c_Clostridia_o_Oscillospirales_f_Ruminococcaceae_g_Bacteroides                    | 99.6        | IPhOP-RF:97.10 | blast:96.60    | CRISPR:94.50   | RafAH:92.70    |
| S14_vt_51134                  | ME     | Duplodnaviria | Heunggongvirae   | Uroviricota | Caudoviricetes | n.a. | Unclassified   | O              | O            | 47.7_d_Bacteria_p_Firmicutes_c_Clostridia_o_Lachnospirales_f_Ruminococcaceae_g_Ruminococcus_D                  | 97.2        | blast:97.00    | IPhOP-RF:92.80 | RafAH:52.60    |                |
| S14_vt_57689                  | ME     | Duplodnaviria | Heunggongvirae   | Uroviricota | Caudoviricetes | n.a. | Unclassified   | O              | O            | 94.04_d_Bacteria_p_Actinobacteriota_c_Actinomycetia_o_Actinomycetiales_f_Actinomycetaceae_g_Actinomycetes      | 99          | blast:94.00    | RafAH:93.30    | CRISPR:80.00   | IPhOP-RF:75.40 |
| S14_vt_85122                  | ME     | Duplodnaviria | Heunggongvirae   | Uroviricota | Caudoviricetes | n.a. | Unclassified   | Unclassified   | O            | 16.16_d_Bacteria_p_Firmicutes_c_Clostridia_o_Clostridiales_f_Clostridiaceae_g_Clostridium                      | 95          | blast:92.30    | IPhOP-RF:86.00 | RafAH:77.50    |                |
| S14_vt_91314                  | ME     | Duplodnaviria | Heunggongvirae   | Uroviricota | Caudoviricetes | n.a. | Salasamviridae | O              | O            | 12.04_d_Bacteria_p_Firmicutes_c_Clostridia_o_Lachnospirales_f_Lachnospiraceae_g_Muricomes                      | 96.7        | CRISPR:97.70   |                |                |                |
| S1_vt_145179                  | Shared | Duplodnaviria | Heunggongvirae   | Uroviricota | Caudoviricetes | n.a. | Stegoviridae   | O              | O            | 44.59_d_Bacteria_p_Bacteroidota_c_Bacteroidia_o_Bacteroidales_f_Bacteroidaceae_g_Prevotella                    | 94.8        | RafAH:96.20    |                |                |                |
| S14_vt_100227                 | ME     | Duplodnaviria | Heunggongvirae   | Uroviricota | Caudoviricetes | n.a. | Unclassified   | O              | O            | 81.21_d_Bacteria_p_Firmicutes_c_Clostridia_o_Lachnospirales_f_Lachnospiraceae_g_Enterocloster                  | 94.2        | CRISPR:95.90   | blast:94.00    | IPhOP-RF:86.30 |                |
| S14_vt_101482                 | ME     | n.a.          | n.a.             | n.a.        | n.a.           | n.a. | n.a.           | n.a.           | n.a.         | 6.74_d_Bacteria_p_Firmicutes_c_Clostridia_o_Oscillospirales_f_Ruminococcaceae_g_QAMM01                         | 92          | blast:94.20    | IPhOP-RF:69.10 |                |                |
| S14_vt_112068                 | ME     | n.a.          | n.a.             | n.a.        | n.a.           | n.a. | n.a.           | n.a.           | n.a.         | 27.86_d_Bacteria_p_Firmicutes_c_Clostridia_o_Oscillospirales_f_Butyricicoccaceae_g_Agathobaculum               | 97.5        | blast:98.20    | IPhOP-RF:66.00 |                |                |
| S14_vt_112345                 | Shared | n.a.          | n.a.             | n.a.        | n.a.           | n.a. | n.a.           | n.a.           | n.a.         | 71.03_d_Bacteria_p_Bacteroidota_c_Bacteroidia_o_Bacteroidales_f_Bacteroidaceae_g_Bacteroides                   | 99.1        | IPhOP-RF:96.70 | RafAH:88.90    | blast:75.90    |                |
| S14_vt_115137                 | ME     | Duplodnaviria | Heunggongvirae   | Uroviricota | Caudoviricetes | n.a. | Unclassified   | O              | O            | 76.83_d_Bacteria_p_Firmicutes_c_Clostridia_o_Lachnospirales_f_Lachnospiraceae_g_Blaustia_A                     | 98.5        | CRISPR:97.10   | blast:94.50    | IPhOP-RF:60.90 |                |
| S14_vt_115455                 | ME     | Duplodnaviria | Heunggongvirae   | Uroviricota | Caudoviricetes | n.a. | Unclassified   | O              | O            | 25.58_d_Bacteria_p_Firmicutes_c_Clostridia_o_Eubacteriales_f_Eubacteriaceae_g_Eubacterium                      | 93.8        | CRISPR:95.00   | IPhOP-RF:89.70 | IPhOP-RF:84.50 |                |
| S5_vt_109527                  | Shared | n.a.          | n.a.             | n.a.        | n.a.           | n.a. | n.a.           | n.a.           | n.a.         | 23.09_d_Bacteria_p_Bacteroidota_c_Bacteroidia_o_Bacteroidales_f_Bacteroidaceae_g_Bacteroides                   | 99          | IPhOP-RF:96.40 | blast:92.90    | RafAH:89.10    |                |
| S14_vt_117153                 | ME     | Duplodnaviria | Heunggongvirae   | Uroviricota | Caudoviricetes | n.a. | Unclassified   | O              | O            | 96.78_d_Bacteria_p_Firmicutes_c_Clostridia_o_Lachnospirales_f_Lachnospiraceae_g_Dorea_A                        | 94.2        | blast:95.90    | IPhOP-RF:94.70 | CRISPR:58.40   |                |
| S5_vt_122344                  | ME     | Duplodnaviria | Heunggongvirae   | Uroviricota | Caudoviricetes | n.a. | Unclassified   | Unclassified   | O            | 26.84_d_Bacteria_p_Firmicutes_c_Clostridia_o_Lachnospirales_f_Lachnospiraceae_g_Roseburia                      | 97.6        | CRISPR:98.30   | blast:95.70    | IPhOP-RF:93.10 |                |
| S14_vt_26230                  | ME     | Duplodnaviria | Heunggongvirae   | Uroviricota | Caudoviricetes | n.a. | Unclassified   | O              | Unclassified | 65.93_d_Bacteria_p_Firmicutes_c_Clostridia_o_Lachnospirales_f_Lachnospiraceae_g_Flavonifractor                 | 95.2        | blast:96.60    | IPhOP-RF:87.20 |                |                |
| S14_vt_30108                  | ME     | n.a.          | n.a.             | n.a.        | n.a.           | n.a. | n.a.           | n.a.           | n.a.         | 19.83_d_Bacteria_p_Firmicutes_c_Clostridia_o_Oscillospirales_f_Lachnospiraceae_g_Enterocloster                 | 92.3        | blast:94.50    | CRISPR:82.40   | IPhOP-RF:78.30 |                |
| S14_vt_38905                  | ME     | n.a.          | n.a.             | n.a.        | n.a.           | n.a. | n.a.           | n.a.           | n.a.         | 9.01_d_Bacteria_p_Firmicutes_c_Clostridia_o_Oscillospirales_f_Ruminococcaceae_g_Ruthenibacterium               | 93.8        | blast:95.60    | IPhOP-RF:81.60 | CRISPR:54.30   |                |
| S14_vt_39266                  | ME     | Duplodnaviria | Heunggongvirae   | Uroviricota | Caudoviricetes | n.a. | Unclassified   | Unclassified   | O            | 15.51_d_Bacteria_p_Firmicutes_c_Clostridia_o_Oscillospirales_f_Actinobacteriaceae_g_Ruminococcus_E             | 98.7        | CRISPR:99.00   | blast:96.80    | IPhOP-RF:93.70 |                |
| S14_vt_56251                  | ME     | Duplodnaviria | Heunggongvirae   | Uroviricota | Caudoviricetes | n.a. | Unclassified   | O              | O            | 20.56_d_Bacteria_p_Firmicutes_c_Clostridia_o_Lachnospirales_f_Lachnospiraceae_g_Muricomes                      | 95.3        | IPhOP-RF:96.70 | blast:93.30    | CRISPR:68.70   |                |
| S14_vt_56410                  | ME     | Duplodnaviria | Heunggongvirae   | Uroviricota | Caudoviricetes | n.a. | Unclassified   | O              | O            | 80.58_d_Bacteria_p_Firmicutes_c_Clostridia_o_Oscillospirales_f_Lachnospiraceae_g_Flavonifractor                | 95.2        | blast:96.60    | IPhOP-RF:95.40 | CRISPR:64.00   |                |
| S14_vt_50934                  | ME     | n.a.          | n.a.             | n.a.        | n.a.           | n.a. | n.a.           | n.a.           | n.a.         | 62.33_d_Bacteria_p_Firmicutes_c_Clostridia_o_Oscillospirales_f_Ruminococcaceae_g_Faecalibacterium              | 99.1        | blast:96.70    | RafAH:89.00    | IPhOP-RF:81.10 |                |
| S14_vt_96286                  | Shared | Duplodnaviria | Heunggongvirae   | Uroviricota | Caudoviricetes | n.a. | Unclassified   | O              | O            | 99.54_d_Bacteria_p_Firmicutes_c_Clostridia_o_Lachnospirales_f_Lachnospiraceae_g_Blaustia                       | 96.3        | RafAH:97.40    |                |                |                |
| S14_vt_97935                  | ME     | n.a.          | n.a.             | n.a.        | n.a.           | n.a. | n.a.           | n.a.           | n.a.         | d_Bacteria_p_Firmicutes_c_Clostridia_o_Oscillospirales_f_Oscillospiraceae_g_CAG-83                             | 90.6        | blast:93.00    | IPhOP-RF:84.20 |                |                |
| S15_vt_3868                   | Shared | Duplodnaviria | Heunggongvirae   | Uroviricota | Caudoviricetes | n.a. | Unclassified   | O              | O            | 100                                                                                                            | RafAH:99.10 | blast:96.50    | IPhOP-RF:61.40 |                |                |
| S15_vt_43913                  | Shared | Duplodnaviria | Heunggongvirae   | Uroviricota | Caudoviricetes | n.a. | Unclassified   | O              | O            | 99.8_d_Bacteria_p_Bacteroidota_c_Bacteroidia_o_Bacteroidales_f_Bacteroidaceae_g_Bacteroides                    | 100         | RafAH:99.30    | IPhOP-RF:97.10 | blast:96.70    |                |
| S16_vt_100473                 | Shared | n.a.          | n.a.             | n.a.        | n.a.           | n.a. | n.a.           | n.a.           | n.a.         | 8.42_d_Bacteria_p_Actinobacteriota_c_Actinomycetia_o_Actinomycetiales_f_Bifidobacteriaceae_g_Bifidobacterium   | 90.3        | blast:92.80    |                |                |                |
| S16_vt_16182                  | Shared | Duplodnaviria | Heunggongvirae   | Uroviricota | Caudoviricetes | n.a. | Unclassified   | O              | O            | 64.12_d_Bacteria_p_Actinobacteriota_c_Actinomycetia_o_Actinomycetiales_f_Actinomycetaceae_g_Pauljensenia       | 96.9        | RafAH:95.10    | CRISPR:68.30   | IPhOP-RF:64.80 |                |
| S16_vt_172897                 | SHNC   | Duplodnaviria | Heunggongvirae   | Uroviricota | Caudoviricetes | n.a. | Unclassified   | O              | O            | 32.49_d_Bacteria_p_Actinobacteriota_c_Actinomycetia_o_Actinomycetiales_f_Bifidobacteriaceae_g_Bifidobacterium  | 98.4        | CRISPR:98.80   | IPhOP-RF:97.10 | blast:93.30    |                |
| S16_vt_5809                   | SHNC   | n.a.          | n.a.             | n.a.        | n.a.           | n.a. | n.a.           | n.a.           | n.a.         | 87.43_d_Bacteria_p_Firmicutes_c_Clostridia_o_Lachnospirales_f_Lachnospiraceae_g_Lachnospira                    | 99.9        | CRISPR:99.00   | IPhOP-RF:95.40 | blast:93.40    | RafAH:91.70    |
| S16_vt_84662                  | Shared | n.a.          | n.a.             | n.a.        | n.a.           | n.a. | n.a.           | n.a.           | n.a.         | 31.67_d_Bacteria_p_Firmicutes_c_Clostridia_o_Lachnospirales_f_Anaerotruncaceae_g_Anaerotruncum                 | 94.2        | blast:95.00    | IPhOP-RF:79.50 |                |                |
| S16_vt_9270                   | Shared | n.a.          | n.a.             | n.a.        | n.a.           | n.a. | n.a.           | n.a.           | n.a.         | 6.58_d_Bacteria_p_Bacteroidota_c_Bacteroidia_o_Bacteroidales_f_Rikenellaceae_g_Alistipes                       | 98.4        | CRISPR:98.80   | IPhOP-RF:95.10 |                |                |
| S16_vt_101072                 | SHNC   | Duplodnaviria | Heunggongvirae</ |             |                |      |                |                |              |                                                                                                                |             |                |                |                |                |























| Table S9-5. VLP_Hosts_pivot                                                                                  | Host interactions with: | # Hosts |
|--------------------------------------------------------------------------------------------------------------|-------------------------|---------|
| d__Bacteria;p__Actinobacteriota;c__Actinomycetia;o__Actinomycetales;f__Actinomycetaceae;g__Actinomyces       | ME-viruses-only         | 59      |
| ME                                                                                                           | SHHC-viruses-only       | 26      |
| S14_vf_57689                                                                                                 | Shared/communal viruses | 90      |
| Caudoviricetes                                                                                               |                         |         |
| Unclassified                                                                                                 |                         |         |
| O                                                                                                            |                         |         |
| O                                                                                                            |                         |         |
| S3_vf_54353                                                                                                  |                         |         |
| Caudoviricetes                                                                                               |                         |         |
| Unclassified                                                                                                 |                         |         |
| Unclassified                                                                                                 |                         |         |
| Cimpunavirus                                                                                                 |                         |         |
| S3_vf_5525                                                                                                   |                         |         |
| n.a.                                                                                                         |                         |         |
| Shared                                                                                                       |                         |         |
| S3_vf_44405                                                                                                  |                         |         |
| Caudoviricetes                                                                                               |                         |         |
| Unclassified                                                                                                 |                         |         |
| Unclassified                                                                                                 |                         |         |
| Unclassified                                                                                                 |                         |         |
| d__Bacteria;p__Actinobacteriota;c__Actinomycetia;o__Actinomycetales;f__Actinomycetaceae;g__Pauljensenia      |                         |         |
| ME                                                                                                           |                         |         |
| S11_vf_66522                                                                                                 |                         |         |
| Caudoviricetes                                                                                               |                         |         |
| Unclassified                                                                                                 |                         |         |
| Unclassified                                                                                                 |                         |         |
| Unclassified                                                                                                 |                         |         |
| Shared                                                                                                       |                         |         |
| S14_vf_117155                                                                                                |                         |         |
| Caudoviricetes                                                                                               |                         |         |
| Unclassified                                                                                                 |                         |         |
| O                                                                                                            |                         |         |
| O                                                                                                            |                         |         |
| S16_vf_16182                                                                                                 |                         |         |
| Caudoviricetes                                                                                               |                         |         |
| Unclassified                                                                                                 |                         |         |
| O                                                                                                            |                         |         |
| O                                                                                                            |                         |         |
| d__Bacteria;p__Actinobacteriota;c__Actinomycetia;o__Actinomycetales;f__Bifidobacteriaceae;g__Bifidobacterium |                         |         |
| ME                                                                                                           |                         |         |
| S11_vf_58587                                                                                                 |                         |         |
| n.a.                                                                                                         |                         |         |
| S13_vs_113593                                                                                                |                         |         |
| Caudoviricetes                                                                                               |                         |         |
| Unclassified                                                                                                 |                         |         |
| Unclassified                                                                                                 |                         |         |
| Unclassified                                                                                                 |                         |         |
| S13_vs_149860                                                                                                |                         |         |
| Caudoviricetes                                                                                               |                         |         |
| Unclassified                                                                                                 |                         |         |
| Unclassified                                                                                                 |                         |         |
| O                                                                                                            |                         |         |
| S3_vf_127408                                                                                                 |                         |         |

Caudoviricetes

Unclassified

O

O

S3\_vs\_39940

n.a.

n.a.

n.a.

n.a.

S7\_vf\_5843

Caudoviricetes

Unclassified

O

O

S7\_vs\_73280

Caudoviricetes

Unclassified

Unclassified

Minunavirus

Shared

S16\_vf\_100473

n.a.

n.a.

n.a.

n.a.

S16\_vs\_78361

Caudoviricetes

Unclassified

O

O

S3\_vf\_70746

Caudoviricetes

Unclassified

Unclassified

Unclassified

S3\_vf\_7137

n.a.

Unclassified

Unclassified

O

S3\_vs\_123834

Caudoviricetes

Unclassified

O

O

S4\_vf\_30103

n.a.

Unclassified

Unclassified

O

S4\_vs\_VIRSorter\_16493-cat\_2

Caudoviricetes

Unclassified

Unclassified

Unclassified

S5\_vs\_63924

Caudoviricetes

Unclassified

Unclassified

Unclassified

S8\_vf\_153696  
n.a.  
n.a.  
n.a.  
S8\_vf\_197061  
Caudoviricetes  
Unclassified  
Unclassified  
Unclassified

SHHC  
S16\_vf\_172897  
Caudoviricetes  
Unclassified  
O  
O  
S16\_vf\_173109  
Caudoviricetes  
Unclassified  
Unclassified  
Unclassified

S4\_vf\_12624  
Caudoviricetes  
Unclassified  
O  
O  
S4\_vs\_VIRSorter\_2744-cat\_3  
Caudoviricetes  
Unclassified  
O  
O  
S4\_vs\_VIRSorter\_5698-cat\_2  
Caudoviricetes  
Unclassified  
O  
O

d\_\_Bacteria;p\_\_Actinobacteriota;c\_\_Actinomycetia;o\_\_Actinomycetales;f\_\_Micrococcaceae;g\_\_Rothia

SHHC  
S8\_vf\_102508  
n.a.  
n.a.  
n.a.  
n.a.  
S8\_vf\_7243  
n.a.  
n.a.  
n.a.  
n.a.

d\_\_Bacteria;p\_\_Actinobacteriota;c\_\_Actinomycetia;o\_\_Mycobacteriales;f\_\_Mycobacteriaceae;g\_\_Mycobacterium

ME  
S9\_vf\_934  
Caudoviricetes  
Unclassified  
O  
O

d\_\_Bacteria;p\_\_Actinobacteriota;c\_\_Coriobacteriia;o\_\_Coriobacteriales;f\_\_Coriobacteriaceae;g\_\_Collinsella

ME  
S5\_vf\_29332  
Caudoviricetes  
Unclassified

O  
O  
S7\_vs\_55526  
n.a.  
n.a.  
n.a.  
n.a.  
Shared  
S3\_vf\_99626  
Caudoviricetes  
Unclassified  
O  
O  
S5\_vf\_137260  
n.a.  
Unclassified  
O  
O  
SHHC  
S12\_vf\_170614  
Caudoviricetes  
Salasmaviridae  
O  
O  
S8\_vf\_142700  
n.a.  
Unclassified  
O  
O  

---

d\_\_Bacteria;p\_\_Actinobacteriota;c\_\_Coriobacteriia;o\_\_Coriobacteriales;f\_\_Eggerthellaceae;g\_\_Adlercreutzia  
Shared  
S12\_vf\_173666  
n.a.  
n.a.  
n.a.  
n.a.  

---

d\_\_Bacteria;p\_\_Actinobacteriota;c\_\_Coriobacteriia;o\_\_Coriobacteriales;f\_\_Eggerthellaceae;g\_\_Eggerthella  
ME  
S7\_vf\_67910  
n.a.  
n.a.  
n.a.  
n.a.  
Shared  
S2\_vf\_16829  
Caudoviricetes  
Unclassified  
Unclassified  
O  

---

d\_\_Bacteria;p\_\_Actinobacteriota;c\_\_Coriobacteriia;o\_\_Coriobacteriales;f\_\_Eggerthellaceae;g\_\_Gordonibacter  
ME  
S3\_vs\_50557  
Caudoviricetes  
Unclassified  
O  
O  
SHHC  
S8\_vf\_195032  
Caudoviricetes  
Unclassified

O  
O

d\_\_Bacteria;p\_\_Bacteroidota;c\_\_Bacteroidia;o\_\_Bacteroidales;f\_\_Bacteroidaceae;g\_\_Bacteroides

---

ME

S11\_vf\_104033

**Caudoviricetes**

Unclassified

O

O

S11\_vf\_43997

**Caudoviricetes**

Unclassified

**Unclassified**

Unclassified

S11\_vs\_23188

**n.a.**

n.a.

**n.a.**

n.a.

S11\_vs\_84848

**Caudoviricetes**

Unclassified

**Unclassified**

Unclassified

S13\_vf\_66508

**Caudoviricetes**

Unclassified

O

O

S14\_vf\_117162

**Caudoviricetes**

Unclassified

**Unclassified**

O

S17\_vs\_116640

**Caudoviricetes**

Unclassified

O

O

S17\_vs\_160502

**Caudoviricetes**

Steigviridae

O

O

S17\_vs\_39515

**Caudoviricetes**

Intestiviridae

O

O

S3\_vf\_18080

**n.a.**

n.a.

**n.a.**

n.a.

S3\_vf\_18829

**Caudoviricetes**

Unclassified

O

O

S3\_vf\_73597

Caudoviricetes

Unclassified

O  
O

S3\_vs\_23194

Caudoviricetes

Duneviridae

O  
O

S3\_vs\_40939

n.a.  
n.a.

n.a.  
n.a.

S3\_vs\_45147

n.a.  
n.a.

n.a.  
n.a.

S5\_vf\_8965

Caudoviricetes

Unclassified

O  
O

S5\_vs\_72532

Caudoviricetes

Unclassified

O  
O

S7\_vf\_27309

Caudoviricetes

Unclassified

Unclassified  
O

S7\_vs\_135828

Malgrandaviricetes

Microviridae

Unclassified  
Unclassified

S7\_vs\_2599

n.a.  
n.a.

n.a.  
n.a.

S7\_vs\_557

Caudoviricetes

Unclassified

O  
O

S7\_vs\_944

n.a.  
n.a.

n.a.  
n.a.

S9\_vs\_83108

n.a.  
n.a.

n.a.  
n.a.

Shared

S10\_vs\_14557  
Caudoviricetes  
Dunviridae  
O  
O  
S10\_vs\_35854  
Caudoviricetes  
Unclassified  
O  
O  
S10\_vs\_36598  
n.a.  
n.a.  
n.a.  
S10\_vs\_58014  
Caudoviricetes  
Unclassified  
Unclassified  
Unclassified  
S10\_vs\_62776  
Caudoviricetes  
Unclassified  
O  
O  
S10\_vs\_71900  
n.a.  
n.a.  
n.a.  
n.a.  
S11\_vs\_3277  
Caudoviricetes  
Unclassified  
Unclassified  
Unclassified  
S11\_vs\_45658  
Caudoviricetes  
Unclassified  
O  
O  
S11\_vs\_58930  
Caudoviricetes  
Unclassified  
Unclassified  
Unclassified  
S12\_vf\_16374  
Caudoviricetes  
Unclassified  
O  
O  
S12\_vs\_141337  
Caudoviricetes  
Unclassified  
Unclassified  
Unclassified  
S12\_vs\_151292  
Caudoviricetes  
Unclassified  
Unclassified  
Unclassified



S12\_vs\_1980  
Caudoviricetes  
Unclassified  
O  
O  
S12\_vs\_26336  
n.a.  
n.a.  
n.a.  
S12\_vs\_99219  
n.a.  
n.a.  
n.a.  
S14\_vs\_112345  
n.a.  
n.a.  
n.a.  
S14\_vs\_11510  
n.a.  
n.a.  
n.a.  
S14\_vs\_25852  
n.a.  
n.a.  
n.a.  
S14\_vs\_32499  
Caudoviricetes  
Unclassified  
O  
O  
S14\_vs\_66208  
Caudoviricetes  
Unclassified  
O  
O  
S14\_vs\_70985  
n.a.  
n.a.  
n.a.  
S14\_vs\_74067  
n.a.  
n.a.  
n.a.  
S15\_vf\_2032  
Caudoviricetes  
Unclassified  
O  
O  
S15\_vf\_75924  
Caudoviricetes  
Steigviridae  
O  
O

S15\_vs\_27510  
n.a.  
n.a.  
n.a.  
S15\_vs\_35445  
n.a.  
n.a.  
n.a.  
S15\_vs\_3868  
Caudoviricetes  
Unclassified  
O  
O  
S15\_vs\_42043  
n.a.  
n.a.  
n.a.  
S15\_vs\_43913  
Caudoviricetes  
Unclassified  
O  
O  
S16\_vs\_127669  
Caudoviricetes  
Unclassified  
Unclassified  
Unclassified  
S16\_vs\_127905  
n.a.  
n.a.  
n.a.  
S16\_vs\_136935  
n.a.  
n.a.  
n.a.  
S16\_vs\_80244  
n.a.  
n.a.  
n.a.  
S17\_vf\_128147  
Malgrandaviricetes  
Microviridae  
Unclassified  
O  
S17\_vf\_140653  
Caudoviricetes  
Unclassified  
O  
O  
S17\_vs\_117507  
n.a.  
n.a.  
n.a.  
n.a.

S17\_vs\_2079  
Caudoviricetes  
Unclassified  
Unclassified  
Unclassified

S2\_vs\_10289  
Caudoviricetes  
Unclassified  
Unclassified  
Unclassified

S3\_vf\_127399  
Caudoviricetes  
Unclassified  
O  
O

S3\_vs\_119660  
Caudoviricetes  
Unclassified  
Unclassified  
Unclassified

S3\_vs\_39774  
n.a.  
n.a.  
n.a.  
n.a.

S3\_vs\_64424  
n.a.  
n.a.  
n.a.  
n.a.

S3\_vs\_70508  
n.a.  
n.a.  
n.a.  
n.a.

S3\_vs\_9158  
n.a.  
n.a.  
n.a.  
n.a.

S4\_vs\_VIRSorter\_31975-circular-cat\_1  
Caudoviricetes  
Unclassified  
O  
O

S5\_vs\_109527  
n.a.  
n.a.  
n.a.  
n.a.

S5\_vs\_129970  
n.a.  
n.a.  
n.a.  
n.a.

S5\_vs\_131510  
Caudoviricetes  
Unclassified  
Unclassified  
O

S5\_vs\_142195

**n.a.**

n.a.

**n.a.**

n.a.

S5\_vs\_80496

**n.a.**

n.a.

**n.a.**

n.a.

S6\_vf\_56486

**Caudoviricetes**

Unclassified

**O**

O

S6\_vs\_46039

**n.a.**

n.a.

**n.a.**

n.a.

S6\_vs\_9784

**n.a.**

n.a.

**n.a.**

n.a.

S7\_vf\_37279

**Caudoviricetes**

Unclassified

**O**

O

S7\_vf\_5801

**Caudoviricetes**

Unclassified

**O**

O

S7\_vs\_11081

**Caudoviricetes**

Unclassified

**Unclassified**

Unclassified

S8\_vf\_208120

**Caudoviricetes**

Unclassified

**O**

O

S8\_vf\_28956

**n.a.**

n.a.

**n.a.**

n.a.

S8\_vs\_147697

**n.a.**

n.a.

**n.a.**

n.a.

S8\_vs\_28311

**Caudoviricetes**

Duneviridae

**O**

O

S8\_vs\_72117  
n.a.  
n.a.  
n.a.  
S8\_vs\_99362  
Caudoviricetes  
Unclassified  
Unclassified  
Unclassified  
S9\_vs\_28197  
Caudoviricetes  
Unclassified  
O  
O  
SHHC  
S10\_vf\_43964  
Caudoviricetes  
Unclassified  
O  
O  
S10\_vs\_106834  
Caudoviricetes  
Unclassified  
O  
O  
S12\_vf\_60224  
Caudoviricetes  
Unclassified  
O  
O  
S16\_vf\_87190  
Caudoviricetes  
Unclassified  
O  
O  
d\_Bacteria;p\_Bacteroidota;c\_Bacteroidia;o\_Bacteroidales;f\_Bacteroidaceae;g\_Phocaeicola  
ME  
S14\_vf\_37500  
Malgrandaviricetes  
Microviridae  
Unclassified  
Unclassified  
d\_Bacteria;p\_Bacteroidota;c\_Bacteroidia;o\_Bacteroidales;f\_Bacteroidaceae;g\_Prevotella  
ME  
S3\_vf\_127450  
n.a.  
n.a.  
n.a.  
n.a.  
Shared  
S11\_vf\_104035  
Caudoviricetes  
Suoliviridae  
O  
O  
S13\_vf\_11246  
Caudoviricetes  
Suoliviridae  
O

O  
S13\_vs\_57267  
Caudoviricetes  
Unclassified  
O  
O  
S5\_vf\_145579  
Caudoviricetes  
Steigviridae  
O  
O  
S8\_vf\_117796  
Caudoviricetes  
Unclassified  
Unclassified  
Unclassified  
S8\_vf\_122206  
Caudoviricetes  
Unclassified  
O  
O  
S8\_vf\_166677  
Caudoviricetes  
Intestiviridae  
Obtuvirinae  
Fohxhuevirus  
S8\_vf\_183045  
Caudoviricetes  
Unclassified  
Unclassified  
Unclassified  
S8\_vf\_79769  
n.a.  
n.a.  
n.a.  
n.a.  
S9\_vf\_13507  
n.a.  
n.a.  
n.a.  
n.a.  
S9\_vf\_51656  
Caudoviricetes  
Intestiviridae  
Obtuvirinae  
Fohxhuevirus  
S9\_vf\_76769  
Caudoviricetes  
Suoliviridae  
Loutivirinae  
Buchavirus  
SHHC  
S4\_vf\_18803  
Caudoviricetes  
Unclassified  
Unclassified  
Unclassified  
S4\_vf\_20440  
Caudoviricetes  
Unclassified

|                                                                                                    |
|----------------------------------------------------------------------------------------------------|
| O                                                                                                  |
| O                                                                                                  |
| S4_vf_31981                                                                                        |
| Caudoviricetes                                                                                     |
| Suoliviridae                                                                                       |
| Uncouvirinae                                                                                       |
| Besingivirus                                                                                       |
| S4_vf_4891                                                                                         |
| n.a.                                                                                               |
| n.a.                                                                                               |
| n.a.                                                                                               |
| n.a.                                                                                               |
| S8_vs_148389                                                                                       |
| Caudoviricetes                                                                                     |
| Unclassified                                                                                       |
| O                                                                                                  |
| O                                                                                                  |
| d_Bacteria;p__Bacteroidota;c__Bacteroidia;o__Bacteroidales;f__Bacteroidaceae;g__Prevotellamassilia |
| SHHC                                                                                               |
| S12_vf_69136                                                                                       |
| Caudoviricetes                                                                                     |
| Unclassified                                                                                       |
| O                                                                                                  |
| O                                                                                                  |
| d_Bacteria;p__Bacteroidota;c__Bacteroidia;o__Bacteroidales;f__Barnesiellaceae;g__Barnesiella       |
| ME                                                                                                 |
| S17_vf_35138                                                                                       |
| Caudoviricetes                                                                                     |
| Unclassified                                                                                       |
| O                                                                                                  |
| O                                                                                                  |
| S9_vs_21850                                                                                        |
| Caudoviricetes                                                                                     |
| Unclassified                                                                                       |
| Unclassified                                                                                       |
| Unclassified                                                                                       |
| Shared                                                                                             |
| S13_vs_90967                                                                                       |
| Malgrandaviricetes                                                                                 |
| Microviridae                                                                                       |
| O                                                                                                  |
| O                                                                                                  |
| S8_vs_4153                                                                                         |
| n.a.                                                                                               |
| n.a.                                                                                               |
| n.a.                                                                                               |
| n.a.                                                                                               |
| SHHC                                                                                               |
| S12_vf_188846                                                                                      |
| Malgrandaviricetes                                                                                 |
| Microviridae                                                                                       |
| O                                                                                                  |
| O                                                                                                  |
| S4_vf_12614                                                                                        |
| n.a.                                                                                               |
| n.a.                                                                                               |
| n.a.                                                                                               |
| n.a.                                                                                               |
| S8_vf_208115                                                                                       |
| Malgrandaviricetes                                                                                 |

|                                                                                                |
|------------------------------------------------------------------------------------------------|
| Microviridae                                                                                   |
| O                                                                                              |
| O                                                                                              |
| d__Bacteria;p__Bacteroidota;c__Bacteroidia;o__Bacteroidales;f__Coproacteraceae;g__Coproacter   |
| ME                                                                                             |
| S7_vs_51332                                                                                    |
| n.a.                                                                                           |
| n.a.                                                                                           |
| n.a.                                                                                           |
| n.a.                                                                                           |
| SHHC                                                                                           |
| S15_vs_18274                                                                                   |
| n.a.                                                                                           |
| n.a.                                                                                           |
| n.a.                                                                                           |
| n.a.                                                                                           |
| d__Bacteria;p__Bacteroidota;c__Bacteroidia;o__Bacteroidales;f__Marinifilaceae;g__Butyricimonas |
| Shared                                                                                         |
| S12_vs_71525                                                                                   |
| n.a.                                                                                           |
| n.a.                                                                                           |
| n.a.                                                                                           |
| n.a.                                                                                           |
| S12_vs_74280                                                                                   |
| n.a.                                                                                           |
| n.a.                                                                                           |
| n.a.                                                                                           |
| n.a.                                                                                           |
| S3_vs_6604                                                                                     |
| Caudoviricetes                                                                                 |
| Duneviridae                                                                                    |
| O                                                                                              |
| O                                                                                              |
| d__Bacteria;p__Bacteroidota;c__Bacteroidia;o__Bacteroidales;f__Marinifilaceae;g__Odoribacter   |
| ME                                                                                             |
| S14_vs_78164                                                                                   |
| Caudoviricetes                                                                                 |
| Winoviridae                                                                                    |
| O                                                                                              |
| O                                                                                              |
| S3_vs_97827                                                                                    |
| n.a.                                                                                           |
| n.a.                                                                                           |
| n.a.                                                                                           |
| n.a.                                                                                           |
| Shared                                                                                         |
| S3_vs_117894                                                                                   |
| n.a.                                                                                           |
| n.a.                                                                                           |
| n.a.                                                                                           |
| n.a.                                                                                           |
| S4_vs_VIRSorter_9913-cat_1                                                                     |
| Caudoviricetes                                                                                 |
| Unclassified                                                                                   |
| Unclassified                                                                                   |
| Unclassified                                                                                   |
| d__Bacteria;p__Bacteroidota;c__Bacteroidia;o__Bacteroidales;f__Muribaculaceae;g__UBA7173       |
| SHHC                                                                                           |
| S12_vs_111286                                                                                  |
| n.a.                                                                                           |



n.a.  
n.a.  
n.a.

d\_Bacteria;p\_Bacteroidota;c\_Bacteroidia;o\_Bacteroidales;f\_P3;g\_Phil12

ME  
S3\_vs\_127442  
Malgrandaviricetes  
Microviridae  
Unclassified  
Unclassified

d\_Bacteria;p\_Bacteroidota;c\_Bacteroidia;o\_Bacteroidales;f\_Rikenellaceae;g\_Alistipes

ME  
S1\_vf\_159951  
Caudoviricetes  
Unclassified  
O  
O  
S11\_vf\_104071  
Caudoviricetes  
Unclassified  
O  
O  
S11\_vs\_36748  
n.a.  
n.a.  
n.a.  
S11\_vs\_98193  
Caudoviricetes  
Unclassified  
Unclassified  
Unclassified  
S13\_vf\_56074  
Caudoviricetes  
Unclassified  
Unclassified  
Unclassified  
S17\_vs\_177196  
n.a.  
n.a.  
n.a.  
n.a.  
S3\_vf\_127406  
Caudoviricetes  
Unclassified  
Unclassified  
Unclassified  
S3\_vs\_127413  
Caudoviricetes  
Unclassified  
O  
O  
S3\_vs\_77156  
Malgrandaviricetes  
Microviridae  
Unclassified  
Unclassified  
S5\_vs\_1338  
n.a.  
n.a.

n.a.  
n.a.  
S7\_vs\_54322  
n.a.  
n.a.  
n.a.  
n.a.

Shared  
S10\_vs\_37694  
Caudoviricetes  
Dunviridae

O  
O  
S11\_vf\_70015  
Caudoviricetes  
Unclassified  
O  
O

S11\_vs\_1937  
Caudoviricetes  
Unclassified  
O  
O

S12\_vf\_174374  
n.a.  
n.a.  
n.a.  
n.a.

S12\_vs\_142625  
Caudoviricetes  
Unclassified  
O  
O

S13\_vs\_83447  
n.a.  
n.a.  
n.a.  
n.a.

S15\_vs\_71968  
Caudoviricetes  
Unclassified  
O  
O

S16\_vf\_9270  
n.a.  
n.a.  
n.a.  
n.a.

S16\_vs\_19968  
n.a.  
n.a.  
n.a.  
n.a.

S16\_vs\_32764  
n.a.  
n.a.  
n.a.  
n.a.

S16\_vs\_33281  
n.a.

n.a.  
n.a.  
n.a.  
S17\_vs\_157209  
n.a.  
n.a.  
n.a.  
n.a.  
S3\_vf\_67828  
Malgrandaviricetes  
Microviridae  
Unclassified  
Unclassified  
S3\_vs\_17168  
Caudoviricetes  
Unclassified  
O  
O  
S3\_vs\_56292  
Caudoviricetes  
Unclassified  
O  
O  
S3\_vs\_89485  
n.a.  
n.a.  
n.a.  
n.a.  
S5\_vf\_18461  
Caudoviricetes  
Unclassified  
O  
O  
S5\_vs\_123256  
Caudoviricetes  
Unclassified  
Unclassified  
Unclassified  
S5\_vs\_20500  
Caudoviricetes  
Unclassified  
O  
O  
S5\_vs\_76500  
Caudoviricetes  
Unclassified  
Unclassified  
Unclassified  
S5\_vs\_79992  
Caudoviricetes  
Winoviridae  
O  
O  
S5\_vs\_93839  
Caudoviricetes  
Unclassified  
O  
O  
S7\_vf\_117697  
n.a.

n.a.  
n.a.  
n.a.  
S7\_vs\_119679  
Caudoviricetes  
Winoviridae  
O  
O  
S7\_vs\_138173  
Caudoviricetes  
Unclassified  
O  
O  
S8\_vs\_179208  
n.a.  
n.a.  
n.a.  
S8\_vs\_40014  
n.a.  
n.a.  
n.a.  
n.a.  
n.a.  
S8\_vs\_9987  
Caudoviricetes  
Unclassified  
O  
O  
S9\_vs\_2799  
n.a.  
n.a.  
n.a.  
n.a.  
S9\_vs\_48424  
n.a.  
n.a.  
n.a.  
n.a.  
SHHC  
S10\_vs\_67471  
n.a.  
n.a.  
n.a.  
n.a.  
S12\_vs\_121913  
n.a.  
n.a.  
n.a.  
n.a.  
S12\_vs\_23796  
Caudoviricetes  
Unclassified  
Unclassified  
Unclassified  
S15\_vf\_20644  
Caudoviricetes  
Unclassified  
Unclassified  
Unclassified  
S16\_vs\_51901

|                                                                                                  |
|--------------------------------------------------------------------------------------------------|
| n.a.                                                                                             |
| n.a.                                                                                             |
| n.a.                                                                                             |
| n.a.                                                                                             |
| d__Bacteria;p__Bacteroidota;c__Bacteroidia;o__Bacteroidales;f__Rikenellaceae;g__Alistipes_A      |
| ME                                                                                               |
| S7_vf_134023                                                                                     |
| n.a.                                                                                             |
| n.a.                                                                                             |
| n.a.                                                                                             |
| n.a.                                                                                             |
| Shared                                                                                           |
| S12_vf_145044                                                                                    |
| n.a.                                                                                             |
| n.a.                                                                                             |
| n.a.                                                                                             |
| n.a.                                                                                             |
| S16_vs_142561                                                                                    |
| Caudoviricetes                                                                                   |
| Unclassified                                                                                     |
| O                                                                                                |
| O                                                                                                |
| S6_vs_32886                                                                                      |
| n.a.                                                                                             |
| n.a.                                                                                             |
| n.a.                                                                                             |
| n.a.                                                                                             |
| S7_vs_50194                                                                                      |
| n.a.                                                                                             |
| n.a.                                                                                             |
| n.a.                                                                                             |
| SHHC                                                                                             |
| S8_vs_9114                                                                                       |
| n.a.                                                                                             |
| n.a.                                                                                             |
| n.a.                                                                                             |
| n.a.                                                                                             |
| d__Bacteria;p__Bacteroidota;c__Bacteroidia;o__Bacteroidales;f__Tannerellaceae;g__Marseille-P3160 |
| Shared                                                                                           |
| S13_vf_87873                                                                                     |
| Caudoviricetes                                                                                   |
| Unclassified                                                                                     |
| Unclassified                                                                                     |
| Unclassified                                                                                     |
| S4_vs_VIRSorter_6022-circular-cat_1                                                              |
| Caudoviricetes                                                                                   |
| Unclassified                                                                                     |
| Unclassified                                                                                     |
| Unclassified                                                                                     |
| d__Bacteria;p__Bacteroidota;c__Bacteroidia;o__Bacteroidales;f__Tannerellaceae;g__Parabacteroides |
| ME                                                                                               |
| S11_vf_68693                                                                                     |
| n.a.                                                                                             |
| n.a.                                                                                             |
| n.a.                                                                                             |
| n.a.                                                                                             |
| S7_vs_55031                                                                                      |
| n.a.                                                                                             |
| n.a.                                                                                             |

n.a.  
n.a.  
Shared  
S10\_vf\_18671  
Caudoviricetes  
Unclassified  
Unclassified  
Unclassified  
S10\_vs\_37379  
n.a.  
n.a.  
n.a.  
n.a.  
S12\_vs\_138261  
n.a.  
n.a.  
n.a.  
n.a.  
S13\_vf\_143422  
Caudoviricetes  
Suoliviridae  
Boorivirinae  
Canhaevirus  
S13\_vs\_15645  
Caudoviricetes  
Unclassified  
O  
O  
S14\_vs\_15228  
Caudoviricetes  
Unclassified  
O  
O  
S17\_vf\_81232  
Caudoviricetes  
Suoliviridae  
Boorivirinae  
Canhaevirus  
S17\_vs\_43307  
n.a.  
n.a.  
n.a.  
n.a.  
S2\_vs\_7306  
Caudoviricetes  
Unclassified  
Unclassified  
Unclassified  
S3\_vs\_80151  
Caudoviricetes  
Unclassified  
O  
O  
S3\_vs\_82895  
Caudoviricetes  
Unclassified  
O  
O  
S4\_vf\_4838  
Caudoviricetes

Suoliviridae  
Boorivirinae  
Cohcovirus  
S4\_vs\_VIRSorter\_13190-cat\_2

Caudoviricetes  
Unclassified  
O

O  
S5\_vs\_1572  
Caudoviricetes  
Unclassified  
Unclassified  
Unclassified

S6\_vs\_15390  
Caudoviricetes  
Unclassified  
O

O  
S7\_vf\_28429  
Caudoviricetes  
Unclassified  
O

O  
S7\_vs\_137915  
Caudoviricetes  
Unclassified  
O

O  
S8\_vf\_158225  
Caudoviricetes  
Intestiviridae

Crudevirinae  
Diorhovirus

S8\_vs\_182288  
Caudoviricetes  
Unclassified  
O

O  
SHHC

S8\_vf\_16172  
n.a.  
n.a.

n.a.  
n.a.

S8\_vs\_126582  
Caudoviricetes  
Unclassified  
O

O

d\_Bacteria;p\_Bacteroidota;c\_Bacteroidia;o\_Bacteroidales;f\_UBA11471;g\_UBA11471

ME

S11\_vs\_79831  
n.a.  
n.a.  
n.a.  
n.a.

d\_Bacteria;p\_Cyanobacteria;c\_Vamprovibrionia;o\_Gastranaerophilales;f\_Gastranaerophilaceae;g\_CAG-306

ME

S11\_vs\_104041  
Caudoviricetes

|                                                                                                                  |
|------------------------------------------------------------------------------------------------------------------|
| Unclassified                                                                                                     |
| O                                                                                                                |
| O                                                                                                                |
| d_Bacteria;p__Cyanobacteria;c__Vampirovibrionia;o__Gastranaerophilales;f__Gastranaerophilaceae;g__QAMI01         |
| ME                                                                                                               |
| S11_vs_82331                                                                                                     |
| Caudoviricetes                                                                                                   |
| Unclassified                                                                                                     |
| O                                                                                                                |
| O                                                                                                                |
| S3_vs_50924                                                                                                      |
| n.a.                                                                                                             |
| n.a.                                                                                                             |
| n.a.                                                                                                             |
| n.a.                                                                                                             |
| d_Bacteria;p__Desulfobacterota;c__Desulfovibrionia;o__Desulfovibrionales;f__Desulfovibrionaceae;g__Bilophila     |
| ME                                                                                                               |
| S17_vs_177203                                                                                                    |
| Caudoviricetes                                                                                                   |
| Unclassified                                                                                                     |
| O                                                                                                                |
| O                                                                                                                |
| Shared                                                                                                           |
| S8_vf_208111                                                                                                     |
| n.a.                                                                                                             |
| n.a.                                                                                                             |
| n.a.                                                                                                             |
| n.a.                                                                                                             |
| d_Bacteria;p__Desulfobacterota;c__Desulfovibrionia;o__Desulfovibrionales;f__Desulfovibrionaceae;g__Mailhella     |
| SHHC                                                                                                             |
| S8_vs_208114                                                                                                     |
| Caudoviricetes                                                                                                   |
| Unclassified                                                                                                     |
| O                                                                                                                |
| O                                                                                                                |
| d_Bacteria;p__Firmicutes;c__Bacilli;o__Erysipelotrichales;f__Erysipelatoclostridiaceae;g__Catenibacterium        |
| Shared                                                                                                           |
| S8_vs_59736                                                                                                      |
| Caudoviricetes                                                                                                   |
| Unclassified                                                                                                     |
| O                                                                                                                |
| O                                                                                                                |
| d_Bacteria;p__Firmicutes;c__Bacilli;o__Erysipelotrichales;f__Erysipelatoclostridiaceae;g__Erysipelatoclostridium |
| ME                                                                                                               |
| S11_vs_68348                                                                                                     |
| Caudoviricetes                                                                                                   |
| Unclassified                                                                                                     |
| O                                                                                                                |
| O                                                                                                                |
| S7_vs_13041                                                                                                      |
| Caudoviricetes                                                                                                   |
| Unclassified                                                                                                     |
| O                                                                                                                |
| O                                                                                                                |
| S9_vs_46498                                                                                                      |
| Caudoviricetes                                                                                                   |
| Unclassified                                                                                                     |
| O                                                                                                                |
| O                                                                                                                |
| d_Bacteria;p__Firmicutes;c__Bacilli;o__Erysipelotrichales;f__Erysipelatoclostridiaceae;g__Faecalibacillus        |



ME  
S17\_vs\_31654  
Caudoviricetes  
Unclassified  
O  
O  
S3\_vs\_94577  
Caudoviricetes  
Unclassified  
O  
O

d\_Bacteria;p\_\_Firmicutes;c\_\_Bacilli;o\_\_Erysipelotrichales;f\_\_Erysipelatoclostridiaceae;g\_\_Massiliomicrobiota

ME  
S11\_vs\_55144  
n.a.  
n.a.  
n.a.  
n.a.  
S7\_vf\_38697  
Caudoviricetes  
Unclassified  
O  
O

d\_Bacteria;p\_\_Firmicutes;c\_\_Bacilli;o\_\_Erysipelotrichales;f\_\_Erysipelotrichaceae;g\_\_Clostridium\_AQ

ME  
S5\_vs\_122618  
n.a.  
n.a.  
n.a.  
n.a.  
S9\_vs\_90846  
Caudoviricetes  
Unclassified  
O  
O

Shared  
S11\_vf\_92391  
n.a.  
n.a.  
n.a.  
n.a.

SHHC  
S2\_vf\_20910  
n.a.  
n.a.  
n.a.  
n.a.

d\_Bacteria;p\_\_Firmicutes;c\_\_Bacilli;o\_\_Erysipelotrichales;f\_\_Erysipelotrichaceae;g\_\_Holdemanella

SHHC  
S4\_vf\_10506  
n.a.  
n.a.  
n.a.  
n.a.

d\_Bacteria;p\_\_Firmicutes;c\_\_Bacilli;o\_\_Erysipelotrichales;f\_\_Erysipelotrichaceae;g\_\_Holdemania

ME  
S11\_vs\_14882  
n.a.  
n.a.  
n.a.

|                                                                                             |
|---------------------------------------------------------------------------------------------|
| n.a.                                                                                        |
| S14_vf_72335                                                                                |
| Caudoviricetes                                                                              |
| Unclassified                                                                                |
| O                                                                                           |
| O                                                                                           |
| S5_vs_51416                                                                                 |
| Caudoviricetes                                                                              |
| Unclassified                                                                                |
| O                                                                                           |
| O                                                                                           |
| S9_vs_37437                                                                                 |
| Caudoviricetes                                                                              |
| Unclassified                                                                                |
| O                                                                                           |
| O                                                                                           |
| Shared                                                                                      |
| S6_vs_56485                                                                                 |
| Caudoviricetes                                                                              |
| Unclassified                                                                                |
| O                                                                                           |
| O                                                                                           |
| d_Bacteria;p_Firmicutes;c_Bacilli;o_Haloplasmatales_A;f_Turicibacteraceae;g_Turicibacter    |
| ME                                                                                          |
| S3_vf_106401                                                                                |
| Caudoviricetes                                                                              |
| Unclassified                                                                                |
| O                                                                                           |
| O                                                                                           |
| S5_vf_28061                                                                                 |
| n.a.                                                                                        |
| n.a.                                                                                        |
| n.a.                                                                                        |
| n.a.                                                                                        |
| d_Bacteria;p_Firmicutes;c_Bacilli;o_Lactobacillales;f_Lactobacillaceae;g_Lacticaseibacillus |
| ME                                                                                          |
| S14_vf_72953                                                                                |
| Caudoviricetes                                                                              |
| Unclassified                                                                                |
| Unclassified                                                                                |
| Unclassified                                                                                |
| d_Bacteria;p_Firmicutes;c_Bacilli;o_Lactobacillales;f_Lactobacillaceae;g_Lactobacillus      |
| ME                                                                                          |
| S14_vf_106156                                                                               |
| Caudoviricetes                                                                              |
| Unclassified                                                                                |
| Unclassified                                                                                |
| Unclassified                                                                                |
| S14_vf_78139                                                                                |
| Caudoviricetes                                                                              |
| Unclassified                                                                                |
| Unclassified                                                                                |
| Unclassified                                                                                |
| S5_vs_6478                                                                                  |
| Caudoviricetes                                                                              |
| Unclassified                                                                                |
| Unclassified                                                                                |
| O                                                                                           |
| O                                                                                           |
| d_Bacteria;p_Firmicutes;c_Bacilli;o_Lactobacillales;f_Lactobacillaceae;g_Leuconostoc        |
| ME                                                                                          |

S7\_vf\_63894  
Caudoviricetes  
Unclassified  
McCleskeyvirinae  
Unaquatrovirus

SHHC  
S8\_vf\_129423  
Caudoviricetes  
Unclassified  
McCleskeyvirinae  
Unaquatrovirus

d\_Bacteria;p\_Firmicutes;c\_Bacilli;o\_Lactobacillales;f\_Lactobacillaceae;g\_Limosilactobacillus

ME  
S5\_vs\_89540  
Caudoviricetes  
Unclassified  
O  
O

d\_Bacteria;p\_Firmicutes;c\_Bacilli;o\_Lactobacillales;f\_Streptococcaceae;g\_Lactococcus

ME  
S7\_vf\_68239  
Caudoviricetes  
Unclassified  
O  
O

Shared  
S3\_vf\_23042  
Caudoviricetes  
Unclassified  
O  
O

S5\_vf\_25423  
Caudoviricetes  
Unclassified  
Unclassified  
Sknavirus

S5\_vf\_55687  
Caudoviricetes  
Unclassified  
O  
O

S7\_vf\_29941  
Caudoviricetes  
Unclassified  
O  
O

S7\_vf\_89197  
Caudoviricetes  
Unclassified  
Unclassified  
Ceduvirus

S8\_vf\_45776  
Caudoviricetes  
Unclassified  
Unclassified  
Sknavirus

d\_Bacteria;p\_Firmicutes;c\_Bacilli;o\_Lactobacillales;f\_Streptococcaceae;g\_Streptococcus

ME  
S5\_vs\_60507  
Caudoviricetes

Unclassified  
Unclassified  
O  
S7\_vf\_138069  
n.a.  
n.a.  
n.a.  
n.a.  
S7\_vf\_37293  
Caudoviricetes  
Unclassified  
O  
O  
S7\_vf\_49007  
Caudoviricetes  
Unclassified  
O  
O  
S9\_vf\_15012  
Caudoviricetes  
Unclassified  
Unclassified  
Unclassified  
S9\_vf\_19284  
n.a.  
n.a.  
n.a.  
n.a.  
S9\_vf\_4115  
Caudoviricetes  
Unclassified  
Unclassified  
Unclassified  
S9\_vf\_90856  
Caudoviricetes  
Unclassified  
Unclassified  
O  
S9\_vf\_90866  
n.a.  
Unclassified  
Unclassified  
Unclassified  
Shared  
S10\_vf\_64371  
n.a.  
n.a.  
n.a.  
n.a.  
n.a.  
S11\_vf\_27845  
n.a.  
n.a.  
n.a.  
n.a.  
S14\_vf\_117157  
n.a.  
n.a.  
n.a.  
n.a.  
SHHC

S8\_vf\_134943  
n.a.  
n.a.  
n.a.  
n.a.

d\_\_Bacteria;p\_\_Firmicutes;c\_\_Bacilli;o\_\_ML615J-28;f\_\_CAG-313;g\_\_CAG-313

Shared  
S13\_vs\_30101  
Caudoviricetes  
Unclassified  
O  
O  
S16\_vs\_141218  
n.a.  
n.a.  
n.a.  
n.a.

d\_\_Bacteria;p\_\_Firmicutes;c\_\_Bacilli;o\_\_RF39;f\_\_UBA660;g\_\_CAG-302

SHHC  
S12\_vs\_123620  
n.a.  
n.a.  
n.a.  
n.a.  
S16\_vs\_165662  
Caudoviricetes  
Unclassified  
O  
O

d\_\_Bacteria;p\_\_Firmicutes;c\_\_Bacilli;o\_\_RF39;f\_\_UBA660;g\_\_CAG-460

Shared  
S13\_vs\_26756  
n.a.  
n.a.  
n.a.  
n.a.  
S13\_vs\_67429  
n.a.  
n.a.  
n.a.  
n.a.

SHHC  
S12\_vf\_105542  
Caudoviricetes  
Unclassified  
O  
O

d\_\_Bacteria;p\_\_Firmicutes;c\_\_Bacilli;o\_\_RF39;f\_\_UBA660;g\_\_CAG-877

SHHC  
S12\_vs\_172379  
n.a.  
n.a.  
n.a.  
n.a.

d\_\_Bacteria;p\_\_Firmicutes;c\_\_Clostridia;o\_\_Acetivibrionales;f\_\_Acetivibrionaceae;g\_\_Ruminiclostridium

ME  
S14\_vs\_102698  
Caudoviricetes  
Unclassified  
O

O

d\_Bacteria;p\_\_Firmicutes;c\_\_Clostridia;o\_\_Christensenellales;f\_\_Borkfalkiaceae;g\_\_QALS01

SHHC

S10\_vs\_120489

n.a.

n.a.

n.a.

n.a.

d\_Bacteria;p\_\_Firmicutes;c\_\_Clostridia;o\_\_Christensenellales;f\_\_CAG-138;g\_\_SFEL01

ME

S3\_vs\_73361

n.a.

n.a.

n.a.

n.a.

SHHC

S8\_vs\_176604

n.a.

n.a.

n.a.

n.a.

d\_Bacteria;p\_\_Firmicutes;c\_\_Clostridia;o\_\_Christensenellales;f\_\_CAG-138;g\_\_UBA1685

SHHC

S8\_vf\_93976

n.a.

n.a.

n.a.

n.a.

d\_Bacteria;p\_\_Firmicutes;c\_\_Clostridia;o\_\_Christensenellales;f\_\_CAG-138;g\_\_UBA5394

SHHC

S16\_vs\_4662

Caudoviricetes

Unclassified

Unclassified

Unclassified

d\_Bacteria;p\_\_Firmicutes;c\_\_Clostridia;o\_\_Christensenellales;f\_\_CAG-74;g\_\_Alectryocaccommicrobium

ME

S5\_vs\_10428

Caudoviricetes

Unclassified

O

O

d\_Bacteria;p\_\_Firmicutes;c\_\_Clostridia;o\_\_Christensenellales;f\_\_CAG-74;g\_\_Firm-11

ME

S7\_vs\_129858

n.a.

n.a.

n.a.

n.a.

d\_Bacteria;p\_\_Firmicutes;c\_\_Clostridia;o\_\_Christensenellales;f\_\_CAG-74;g\_\_Limiplasma

ME

S5\_vs\_4737

n.a.

n.a.

n.a.

n.a.

d\_Bacteria;p\_\_Firmicutes;c\_\_Clostridia;o\_\_Christensenellales;f\_\_CAG-74;g\_\_SFTH01

ME

S5\_vs\_145605

Caudoviricetes

|                                                                                                        |
|--------------------------------------------------------------------------------------------------------|
| Unclassified                                                                                           |
| O                                                                                                      |
| O                                                                                                      |
| d_Bacteria;p__Firmicutes;c__Clostridia;o__Christensenellales;f__CAG-74;g__UBA11524                     |
| ME                                                                                                     |
| S1_vf_158961                                                                                           |
| Caudoviricetes                                                                                         |
| Unclassified                                                                                           |
| O                                                                                                      |
| O                                                                                                      |
| S7_vs_30665                                                                                            |
| n.a.                                                                                                   |
| Shared                                                                                                 |
| S12_vs_94042                                                                                           |
| n.a.                                                                                                   |
| n.a.                                                                                                   |
| n.a.                                                                                                   |
| n.a.                                                                                                   |
| S3_vs_90341                                                                                            |
| n.a.                                                                                                   |
| S8_vf_65522                                                                                            |
| n.a.                                                                                                   |
| n.a.                                                                                                   |
| n.a.                                                                                                   |
| n.a.                                                                                                   |
| SHHC                                                                                                   |
| S12_vs_48045                                                                                           |
| Caudoviricetes                                                                                         |
| Unclassified                                                                                           |
| Unclassified                                                                                           |
| Unclassified                                                                                           |
| S16_vs_15093                                                                                           |
| Caudoviricetes                                                                                         |
| Unclassified                                                                                           |
| O                                                                                                      |
| O                                                                                                      |
| d_Bacteria;p__Firmicutes;c__Clostridia;o__Christensenellales;f__CAG-74;g__Ventricola                   |
| SHHC                                                                                                   |
| S4_vf_31979                                                                                            |
| Caudoviricetes                                                                                         |
| Unclassified                                                                                           |
| Unclassified                                                                                           |
| O                                                                                                      |
| d_Bacteria;p__Firmicutes;c__Clostridia;o__Christensenellales;f__CAG-917;g__CAG-475                     |
| SHHC                                                                                                   |
| S12_vs_32669                                                                                           |
| n.a.                                                                                                   |
| d_Bacteria;p__Firmicutes;c__Clostridia;o__Christensenellales;f__Christensenellaceae;g__Christensenella |
| ME                                                                                                     |
| S5_vs_145581                                                                                           |
| n.a.                                                                                                   |

n.a.  
n.a.  
n.a.

d\_Bacteria;p\_Firmicutes;c\_Clostridia;o\_Christensenellales;f\_NSI-53;g\_NSI-53

ME

S5\_vs\_145597  
Caudoviricetes  
Unclassified  
O  
O

d\_Bacteria;p\_Firmicutes;c\_Clostridia;o\_Christensenellales;f\_QAND01;g\_UMGS1975

ME

S5\_vs\_46394  
n.a.  
n.a.  
n.a.  
n.a.

d\_Bacteria;p\_Firmicutes;c\_Clostridia;o\_Clostridiales;f\_Clostridiaceae;g\_Clostridium

ME

S11\_vs\_41107  
Caudoviricetes  
Unclassified  
O  
O  
S14\_vf\_56130  
Caudoviricetes  
Unclassified  
O  
O  
S14\_vf\_85122  
Caudoviricetes  
Unclassified  
Unclassified  
O  
S14\_vs\_632  
Caudoviricetes  
Unclassified  
O  
O  
S3\_vf\_100440  
Caudoviricetes  
Unclassified  
O  
O  
S3\_vs\_98675  
Caudoviricetes  
Unclassified  
O  
O  
S5\_vf\_145583  
Caudoviricetes  
Unclassified  
Unclassified  
O  
S5\_vs\_137154  
Caudoviricetes  
Unclassified  
O  
O  
S9\_vs\_90851



Caudoviricetes  
Unclassified  
O  
O

Shared  
S16\_vf\_36146  
Caudoviricetes  
Unclassified  
O  
O

SHHC  
S10\_vf\_62230  
Caudoviricetes  
Unclassified  
O  
O

d\_\_Bacteria;p\_\_Firmicutes;c\_\_Clostridia;o\_\_Clostridiales;f\_\_Clostridiaceae;g\_\_Clostridium\_J

ME  
S5\_vf\_6506  
Caudoviricetes  
Unclassified  
O  
O

d\_\_Bacteria;p\_\_Firmicutes;c\_\_Clostridia;o\_\_Eubacteriales;f\_\_Eubacteriaceae;g\_\_Eubacterium

ME  
S11\_vs\_81775  
Caudoviricetes  
Unclassified  
Unclassified  
Unclassified  
S14\_vs\_115455  
Caudoviricetes  
Unclassified  
O  
O

d\_\_Bacteria;p\_\_Firmicutes;c\_\_Clostridia;o\_\_Lachnospirales;f\_\_Anaerotignaceae;g\_\_Anaerotignum

ME  
S1\_vs\_145792  
n.a.  
n.a.  
n.a.  
n.a.  
S9\_vs\_90849  
n.a.  
n.a.  
n.a.  
n.a.

Shared  
S16\_vf\_84462  
n.a.  
n.a.  
n.a.  
n.a.  
S5\_vf\_60597  
n.a.  
n.a.  
n.a.  
n.a.  
S8\_vf\_201695  
n.a.

|                                                                                              |
|----------------------------------------------------------------------------------------------|
| n.a.                                                                                         |
| n.a.                                                                                         |
| n.a.                                                                                         |
| d_Bacteria;p__Firmicutes;c__Clostridia;o__Lachnospirales;f__Anaerotignaceae;g__UMGS1670      |
| ME                                                                                           |
| S7_vf_72493                                                                                  |
| n.a.                                                                                         |
| n.a.                                                                                         |
| n.a.                                                                                         |
| n.a.                                                                                         |
| d_Bacteria;p__Firmicutes;c__Clostridia;o__Lachnospirales;f__CAG-274;g__CAG-274               |
| ME                                                                                           |
| S9_vf_73311                                                                                  |
| Caudoviricetes                                                                               |
| Unclassified                                                                                 |
| Unclassified                                                                                 |
| Unclassified                                                                                 |
| d_Bacteria;p__Firmicutes;c__Clostridia;o__Lachnospirales;f__Lachnospiraceae;g__              |
| ME                                                                                           |
| S11_vf_34008                                                                                 |
| Caudoviricetes                                                                               |
| Unclassified                                                                                 |
| O                                                                                            |
| O                                                                                            |
| S11_vs_6878                                                                                  |
| Caudoviricetes                                                                               |
| Unclassified                                                                                 |
| O                                                                                            |
| O                                                                                            |
| S5_vf_105728                                                                                 |
| Caudoviricetes                                                                               |
| Unclassified                                                                                 |
| O                                                                                            |
| O                                                                                            |
| d_Bacteria;p__Firmicutes;c__Clostridia;o__Lachnospirales;f__Lachnospiraceae;g__Acetatifactor |
| SHHC                                                                                         |
| S16_vs_116956                                                                                |
| n.a.                                                                                         |
| n.a.                                                                                         |
| n.a.                                                                                         |
| n.a.                                                                                         |
| S6_vs_29152                                                                                  |
| Caudoviricetes                                                                               |
| Unclassified                                                                                 |
| O                                                                                            |
| O                                                                                            |
| d_Bacteria;p__Firmicutes;c__Clostridia;o__Lachnospirales;f__Lachnospiraceae;g__Agathobacter  |
| ME                                                                                           |
| S3_vf_67333                                                                                  |
| Caudoviricetes                                                                               |
| Unclassified                                                                                 |
| O                                                                                            |
| O                                                                                            |
| Shared                                                                                       |
| S14_vs_66841                                                                                 |
| Caudoviricetes                                                                               |
| Unclassified                                                                                 |
| O                                                                                            |
| O                                                                                            |
| S3_vs_127421                                                                                 |

Caudoviricetes  
Unclassified  
O  
O  
S7\_vs\_49426  
Caudoviricetes  
Unclassified  
O  
O  
S8\_vf\_132697  
Caudoviricetes  
Unclassified  
O  
O  
S8\_vs\_173961  
Caudoviricetes  
Unclassified  
O  
O

d\_Bacteria;p\_Firmicutes;c\_Clostridia;o\_Lachnospirales;f\_Lachnospiraceae;g\_Anaerobutyricum

ME  
S5\_vs\_145602  
Caudoviricetes  
Unclassified  
O  
O  
S7\_vf\_114476  
Caudoviricetes  
Unclassified  
O  
O  
S7\_vs\_137611  
Caudoviricetes  
Unclassified  
O  
O  
S7\_vs\_138109  
Caudoviricetes  
Unclassified  
O  
O

d\_Bacteria;p\_Firmicutes;c\_Clostridia;o\_Lachnospirales;f\_Lachnospiraceae;g\_Anaerostipes

ME  
S14\_vs\_39797  
Caudoviricetes  
Unclassified  
O  
O  
S5\_vf\_116300  
n.a.  
n.a.  
n.a.  
n.a.  
S5\_vs\_139401  
n.a.  
n.a.  
n.a.  
n.a.  
S5\_vs\_141621  
Caudoviricetes

Unclassified  
O  
O  
S7\_vf\_49485  
Caudoviricetes  
Unclassified  
O  
O

---

d\_\_Bacteria;p\_\_Firmicutes;c\_\_Clostridia;o\_\_Lachnospirales;f\_\_Lachnospiraceae;g\_\_Bariatricus

ME  
S11\_vf\_10907  
Caudoviricetes  
Unclassified  
O  
O  
S7\_vs\_86377  
Caudoviricetes  
Unclassified  
O  
O  
Shared  
S9\_vs\_1966  
Caudoviricetes  
Unclassified  
O  
O  
SHHC  
S12\_vs\_98175  
Caudoviricetes  
Unclassified  
O  
O

---

d\_\_Bacteria;p\_\_Firmicutes;c\_\_Clostridia;o\_\_Lachnospirales;f\_\_Lachnospiraceae;g\_\_Blautia

ME  
S14\_vs\_115377  
Caudoviricetes  
Unclassified  
O  
O  
S5\_vs\_95307  
Caudoviricetes  
Unclassified  
Unclassified  
O  
O  
Shared  
S14\_vs\_96286  
Caudoviricetes  
Unclassified  
O  
O  
S6\_vs\_54606  
Caudoviricetes  
Unclassified  
O  
O

---

d\_\_Bacteria;p\_\_Firmicutes;c\_\_Clostridia;o\_\_Lachnospirales;f\_\_Lachnospiraceae;g\_\_Blautia\_A

ME  
S11\_vf\_28645  
n.a.  
n.a.

n.a.  
n.a.  
S11\_vs\_34137  
Caudoviricetes  
Unclassified  
O  
O  
S11\_vs\_82368  
Caudoviricetes  
Unclassified  
O  
O  
S13\_vs\_121307  
n.a.  
n.a.  
n.a.  
n.a.  
S3\_vf\_8058  
Caudoviricetes  
Unclassified  
Unclassified  
Eponavirus  
S5\_vs\_68254  
Caudoviricetes  
Unclassified  
O  
O  
S7\_vs\_101751  
n.a.  
n.a.  
n.a.  
n.a.  
S7\_vs\_135679  
n.a.  
n.a.  
n.a.  
n.a.  
n.a.  
S7\_vs\_48708  
Caudoviricetes  
Unclassified  
O  
O  
S9\_vs\_90859  
n.a.  
Unclassified  
O  
O  
Shared  
S10\_vf\_80712  
n.a.  
n.a.  
n.a.  
n.a.  
S11\_vf\_28515  
Caudoviricetes  
Unclassified  
O  
O  
S16\_vf\_96483  
n.a.

|                                                                                               |
|-----------------------------------------------------------------------------------------------|
| n.a.                                                                                          |
| n.a.                                                                                          |
| n.a.                                                                                          |
| S17_vf_46388                                                                                  |
| Caudoviricetes                                                                                |
| Unclassified                                                                                  |
| O                                                                                             |
| O                                                                                             |
| S3_vf_11428                                                                                   |
| Caudoviricetes                                                                                |
| Unclassified                                                                                  |
| O                                                                                             |
| O                                                                                             |
| S4_vf_13353                                                                                   |
| Caudoviricetes                                                                                |
| Unclassified                                                                                  |
| O                                                                                             |
| O                                                                                             |
| S5_vf_145604                                                                                  |
| Caudoviricetes                                                                                |
| Unclassified                                                                                  |
| O                                                                                             |
| O                                                                                             |
| S5_vs_97574                                                                                   |
| Caudoviricetes                                                                                |
| Unclassified                                                                                  |
| O                                                                                             |
| O                                                                                             |
| S7_vs_137998                                                                                  |
| n.a.                                                                                          |
| n.a.                                                                                          |
| n.a.                                                                                          |
| n.a.                                                                                          |
| SHHC                                                                                          |
| S4_vs_VIRSorter_12831-circular-cat_2                                                          |
| Caudoviricetes                                                                                |
| Unclassified                                                                                  |
| O                                                                                             |
| O                                                                                             |
| d_Bacteria;p__Firmicutes;c__Clostridia;o__Lachnospirales;f__Lachnospiraceae;g__CAG-127        |
| ME                                                                                            |
| S9_vs_75050                                                                                   |
| Caudoviricetes                                                                                |
| Unclassified                                                                                  |
| O                                                                                             |
| O                                                                                             |
| SHHC                                                                                          |
| S16_vs_101072                                                                                 |
| Caudoviricetes                                                                                |
| Unclassified                                                                                  |
| O                                                                                             |
| O                                                                                             |
| d_Bacteria;p__Firmicutes;c__Clostridia;o__Lachnospirales;f__Lachnospiraceae;g__CAG-317        |
| Shared                                                                                        |
| S16_vs_140709                                                                                 |
| n.a.                                                                                          |
| n.a.                                                                                          |
| n.a.                                                                                          |
| n.a.                                                                                          |
| d_Bacteria;p__Firmicutes;c__Clostridia;o__Lachnospirales;f__Lachnospiraceae;g__Clostridium_AP |

ME

S5\_vs\_145590

**Caudoviricetes**

Unclassified

**O**

O

d\_\_Bacteria;p\_\_Firmicutes;c\_\_Clostridia;o\_\_Lachnospirales;f\_\_Lachnospiraceae;g\_\_Coprococcus

Shared

S14\_vf\_92240

**Caudoviricetes**

Unclassified

**O**

O

SHHC

S16\_vs\_173079

**Caudoviricetes**

Unclassified

**O**

O

d\_\_Bacteria;p\_\_Firmicutes;c\_\_Clostridia;o\_\_Lachnospirales;f\_\_Lachnospiraceae;g\_\_Dorea

ME

S9\_vs\_32588

**Caudoviricetes**

Unclassified

**O**

O

Shared

S12\_vs\_163990

**Caudoviricetes**

Unclassified

**O**

O

d\_\_Bacteria;p\_\_Firmicutes;c\_\_Clostridia;o\_\_Lachnospirales;f\_\_Lachnospiraceae;g\_\_Dorea\_A

ME

S11\_vs\_83666

**Caudoviricetes**

Unclassified

**O**

O

S14\_vs\_117153

**Caudoviricetes**

Unclassified

**O**

O

S5\_vs\_84946

**Caudoviricetes**

Unclassified

**O**

O

S7\_vs\_13799

**Caudoviricetes**

Unclassified

**O**

O

S9\_vs\_58086

**Caudoviricetes**

Unclassified

**O**

O

Shared

S5\_vf\_145588  
Caudoviricetes  
Unclassified  
O  
O

d\_\_Bacteria;p\_\_Firmicutes;c\_\_Clostridia;o\_\_Lachnospirales;f\_\_Lachnospiraceae;g\_\_Eisenbergiella

ME  
S9\_vs\_88286  
n.a.  
n.a.  
n.a.  
n.a.

d\_\_Bacteria;p\_\_Firmicutes;c\_\_Clostridia;o\_\_Lachnospirales;f\_\_Lachnospiraceae;g\_\_Enterocloster

ME  
S11\_vs\_38860  
n.a.  
n.a.  
n.a.  
n.a.

S11\_vs\_67573  
n.a.  
n.a.  
n.a.  
n.a.

S14\_vs\_100227  
Caudoviricetes  
Unclassified  
O  
O

S14\_vs\_30108  
n.a.  
n.a.  
n.a.  
n.a.

S5\_vs\_145578  
Caudoviricetes  
Unclassified  
O  
O

S9\_vs\_41371  
Caudoviricetes  
Unclassified  
O  
O

S9\_vs\_4343  
n.a.  
n.a.  
n.a.  
n.a.

S9\_vs\_55738  
Caudoviricetes  
Unclassified  
O  
O

Shared  
S5\_vf\_145585  
Caudoviricetes  
Unclassified  
Unclassified  
Unclassified



S6\_vs\_39025  
Caudoviricetes  
Unclassified  
O  
O

S7\_vs\_65719  
Caudoviricetes  
Unclassified  
O  
O

S9\_vs\_90848  
Caudoviricetes  
Unclassified  
O  
O

d\_Bacteria;p\_\_Firmicutes;c\_\_Clostridia;o\_\_Lachnospirales;f\_\_Lachnospiraceae;g\_\_Eubacterium\_F

ME

S7\_vs\_60775  
Caudoviricetes  
Unclassified  
O  
O

Shared  
S14\_vf\_99344  
n.a.  
n.a.  
n.a.  
n.a.

SHHC  
S8\_vf\_131009  
Caudoviricetes  
Unclassified  
O  
O

d\_Bacteria;p\_\_Firmicutes;c\_\_Clostridia;o\_\_Lachnospirales;f\_\_Lachnospiraceae;g\_\_Eubacterium\_G

ME

S5\_vs\_8125  
Caudoviricetes  
Unclassified  
O  
O

S7\_vs\_30640  
Caudoviricetes  
Unclassified  
O  
O

SHHC  
S16\_vs\_118029  
Caudoviricetes  
Unclassified  
O  
O

d\_Bacteria;p\_\_Firmicutes;c\_\_Clostridia;o\_\_Lachnospirales;f\_\_Lachnospiraceae;g\_\_Eubacterium\_I

ME

S11\_vs\_104042  
n.a.  
n.a.  
n.a.  
n.a.

d\_Bacteria;p\_\_Firmicutes;c\_\_Clostridia;o\_\_Lachnospirales;f\_\_Lachnospiraceae;g\_\_Faecalimonas

ME

S5\_vs\_59798

Caudoviricetes

Unclassified

O

O

S7\_vf\_68546

Caudoviricetes

Unclassified

O

O

d\_Bacteria;p\_Firmicutes;c\_Clostridia;o\_Lachnospirales;f\_Lachnospiraceae;g\_Frisingicoccus

ME

S5\_vs\_58766

Caudoviricetes

Unclassified

O

O

d\_Bacteria;p\_Firmicutes;c\_Clostridia;o\_Lachnospirales;f\_Lachnospiraceae;g\_Hungatella

ME

S5\_vs\_17520

n.a.

n.a.

n.a.

n.a.

S9\_vs\_48240

Caudoviricetes

Unclassified

Unclassified

O

d\_Bacteria;p\_Firmicutes;c\_Clostridia;o\_Lachnospirales;f\_Lachnospiraceae;g\_Lachnospira

ME

S14\_vf\_117150

Caudoviricetes

Unclassified

O

O

S3\_vf\_108959

n.a.

n.a.

n.a.

n.a.

S3\_vf\_127405

Caudoviricetes

Unclassified

O

O

S3\_vs\_127401

Caudoviricetes

Unclassified

O

O

Shared

S5\_vs\_120584

Caudoviricetes

Unclassified

O

O

SHHC

S12\_vs\_26847

n.a.  
n.a.  
n.a.  
n.a.  
S12\_vs\_99092  
Caudoviricetes  
Unclassified  
O  
O  
S15\_vf\_2513  
n.a.  
n.a.  
n.a.  
n.a.  
S16\_vf\_1037  
n.a.  
n.a.  
n.a.  
n.a.  
S16\_vf\_5809  
n.a.  
n.a.  
n.a.  
n.a.  
S4\_vf\_31978  
n.a.  
n.a.  
n.a.  
n.a.  

---

d\_\_Bacteria;p\_\_Firmicutes;c\_\_Clostridia;o\_\_Lachnospirales;f\_\_Lachnospiraceae;g\_\_Marvinbryantia  
Shared  
S6\_vs\_56496  
Caudoviricetes  
Unclassified  
Unclassified  
Eponavirus  

---

d\_\_Bacteria;p\_\_Firmicutes;c\_\_Clostridia;o\_\_Lachnospirales;f\_\_Lachnospiraceae;g\_\_Massilistercora  
Shared  
S8\_vs\_5211  
n.a.  
n.a.  
n.a.  
n.a.  

---

d\_\_Bacteria;p\_\_Firmicutes;c\_\_Clostridia;o\_\_Lachnospirales;f\_\_Lachnospiraceae;g\_\_Mediterraneibacter  
ME  
S5\_vs\_28263  
n.a.  
n.a.  
n.a.  
n.a.  
S7\_vs\_138116  
n.a.  
n.a.  
n.a.  
n.a.  
n.a.  
Shared  
S11\_vs\_68151  
Caudoviricetes  
Unclassified  
O

O  
S4\_vs\_VIRSorter\_3006-cat\_1  
Caudoviricetes  
Unclassified

O  
O  
S7\_vs\_41098  
Caudoviricetes  
Unclassified  
O  
O

SHHC  
S4\_vs\_VIRSorter\_19324-cat\_2  
Caudoviricetes  
Unclassified  
O  
O

S4\_vs\_VIRSorter\_31916-circular-cat\_1  
Caudoviricetes  
Unclassified  
O  
O

d\_Bacteria;p\_Firmicutes;c\_Clostridia;o\_Lachnospirales;f\_Lachnospiraceae;g\_Muricomes

ME  
S14\_vf\_93134  
Caudoviricetes  
Salasmaviridae  
O  
O

S14\_vs\_56251  
Caudoviricetes  
Unclassified  
O  
O

S14\_vs\_59347  
Caudoviricetes  
Unclassified  
O  
O

S17\_vf\_36452  
Caudoviricetes  
Salasmaviridae  
O  
O

S5\_vs\_80498  
Caudoviricetes  
Unclassified  
O  
O

Shared  
S2\_vf\_17850  
Caudoviricetes  
Salasmaviridae  
O  
O

S6\_vs\_56498  
Caudoviricetes  
Unclassified  
O  
O

SHHC

S12\_vf\_61299  
Caudoviricetes  
Salasmaviridae  
O  
O

d\_\_Bacteria;p\_\_Firmicutes;c\_\_Clostridia;o\_\_Lachnospirales;f\_\_Lachnospiraceae;g\_\_OF09-33XD

SHHC

S12\_vf\_176437  
Caudoviricetes  
Salasmaviridae  
O  
O

d\_\_Bacteria;p\_\_Firmicutes;c\_\_Clostridia;o\_\_Lachnospirales;f\_\_Lachnospiraceae;g\_\_Roseburia

ME

S14\_vf\_58919  
Caudoviricetes  
Unclassified  
Unclassified  
Mushuvirus

S5\_vs\_120079  
Caudoviricetes  
Unclassified  
Unclassified  
Unclassified

S5\_vs\_122344  
Caudoviricetes  
Unclassified  
Unclassified  
O

S5\_vs\_145598  
Caudoviricetes  
Unclassified  
O  
O

Shared

S3\_vs\_16825  
Caudoviricetes  
Unclassified  
O  
O

S4\_vs\_VIRSorter\_4746-cat\_2  
Caudoviricetes  
Salasmaviridae  
O  
O

S6\_vs\_12945  
Caudoviricetes  
Unclassified  
O  
O

S8\_vs\_206526  
Caudoviricetes  
Unclassified  
Unclassified  
Unclassified

d\_\_Bacteria;p\_\_Firmicutes;c\_\_Clostridia;o\_\_Lachnospirales;f\_\_Lachnospiraceae;g\_\_RUG115

ME

S7\_vs\_38834  
Caudoviricetes

Unclassified  
O  
O  
d\_Bacteria;p\_\_Firmicutes;c\_\_Clostridia;o\_\_Lachnospirales;f\_\_Lachnospiraceae;g\_\_Ruminococcus\_B  
ME  
S14\_vs\_26320  
Caudoviricetes  
Unclassified  
O  
O  
S7\_vf\_60968  
Caudoviricetes  
Unclassified  
O  
O  
S9\_vs\_44331  
Caudoviricetes  
Unclassified  
O  
O  
d\_Bacteria;p\_\_Firmicutes;c\_\_Clostridia;o\_\_Lachnospirales;f\_\_Lachnospiraceae;g\_\_Sellimonas  
ME  
S9\_vs\_34898  
Caudoviricetes  
Unclassified  
O  
O  
S9\_vs\_62803  
Caudoviricetes  
Unclassified  
O  
O  
Shared  
S6\_vs\_56491  
Caudoviricetes  
Unclassified  
O  
O  
d\_Bacteria;p\_\_Firmicutes;c\_\_Clostridia;o\_\_Lachnospirales;f\_\_Lachnospiraceae;g\_\_UBA9502  
SHHC  
S10\_vf\_46328  
Caudoviricetes  
Unclassified  
O  
O  
d\_Bacteria;p\_\_Firmicutes;c\_\_Clostridia;o\_\_Lachnospirales;f\_\_Lachnospiraceae;g\_\_Ventrimonas  
ME  
S11\_vs\_26767  
Caudoviricetes  
Unclassified  
O  
O  
d\_Bacteria;p\_\_Firmicutes;c\_\_Clostridia;o\_\_Monoglobales;f\_\_Monoglobaceae;g\_\_Monoglobus  
Shared  
S3\_vf\_101611  
Caudoviricetes  
Unclassified  
O  
O  
SHHC

S16\_vs\_38863  
Caudoviricetes  
Unclassified  
O  
O

d\_Bacteria;p\_Firmicutes;c\_Clostridia;o\_Oscillospirales;f\_Acutalibacteraceae;g\_Acutalibacter

ME  
S3\_vs\_114271  
n.a.  
n.a.  
n.a.  
n.a.

d\_Bacteria;p\_Firmicutes;c\_Clostridia;o\_Oscillospirales;f\_Acutalibacteraceae;g\_An172

ME  
S11\_vs\_48109  
Caudoviricetes  
Unclassified  
O  
O

d\_Bacteria;p\_Firmicutes;c\_Clostridia;o\_Oscillospirales;f\_Acutalibacteraceae;g\_CAG-180

ME  
S11\_vf\_104052  
Caudoviricetes  
Unclassified  
O  
O  
S7\_vs\_47050  
Caudoviricetes  
Unclassified  
O  
O

d\_Bacteria;p\_Firmicutes;c\_Clostridia;o\_Oscillospirales;f\_Acutalibacteraceae;g\_CAG-217

ME  
S3\_vs\_122706  
Caudoviricetes  
Unclassified  
O  
O  
S3\_vs\_18858  
n.a.  
n.a.  
n.a.  
n.a.

d\_Bacteria;p\_Firmicutes;c\_Clostridia;o\_Oscillospirales;f\_Acutalibacteraceae;g\_Eubacterium\_R

SHHC  
S16\_vs\_120149  
n.a.  
n.a.  
n.a.  
n.a.

d\_Bacteria;p\_Firmicutes;c\_Clostridia;o\_Oscillospirales;f\_Acutalibacteraceae;g\_Fimivicius

ME  
S14\_vs\_88666  
Caudoviricetes  
Unclassified  
O  
O

d\_Bacteria;p\_Firmicutes;c\_Clostridia;o\_Oscillospirales;f\_Acutalibacteraceae;g\_Hydrogeniclostridium

ME  
S7\_vs\_28733

Caudoviricetes  
Unclassified  
O  
O  
S7\_vs\_38113  
Caudoviricetes  
Unclassified  
O  
O  
d\_Bacteria;p\_\_Firmicutes;c\_\_Clostridia;o\_\_Oscillospirales;f\_\_Acetivibacteraceae;g\_\_Pseudomonococcus

---

Shared  
S10\_vs\_77004  
n.a.  
n.a.  
n.a.  
n.a.

---

d\_Bacteria;p\_\_Firmicutes;c\_\_Clostridia;o\_\_Oscillospirales;f\_\_Acetivibacteraceae;g\_\_Ruminococcus\_E

---

ME  
S13\_vf\_28309  
Caudoviricetes  
Salasmaviridae  
O  
O  
S14\_vs\_39266  
Caudoviricetes  
Unclassified  
Unclassified  
O  
S3\_vs\_49835  
n.a.  
n.a.  
n.a.  
n.a.  
S5\_vs\_20268  
Caudoviricetes  
Unclassified  
Unclassified  
Unclassified  
S5\_vs\_40848  
Caudoviricetes  
Unclassified  
O  
O  
S7\_vs\_72737  
n.a.  
n.a.  
n.a.  
n.a.

Shared  
S14\_vs\_66139  
Caudoviricetes  
Unclassified  
O  
O  
S16\_vs\_82116  
Caudoviricetes  
Unclassified  
Unclassified  
O  
S4\_vf\_11308



|                                                                                              |
|----------------------------------------------------------------------------------------------|
| Caudoviricetes                                                                               |
| Unclassified                                                                                 |
| Unclassified                                                                                 |
| O                                                                                            |
| S7_vs_16344                                                                                  |
| Caudoviricetes                                                                               |
| Unclassified                                                                                 |
| O                                                                                            |
| O                                                                                            |
| S8_vs_115958                                                                                 |
| Caudoviricetes                                                                               |
| Unclassified                                                                                 |
| Unclassified                                                                                 |
| O                                                                                            |
| S9_vs_90727                                                                                  |
| Caudoviricetes                                                                               |
| Unclassified                                                                                 |
| Unclassified                                                                                 |
| O                                                                                            |
| d__Bacteria;p__Firmicutes;c__Clostridia;o__Oscillospirales;f__Acetivibacteraceae;g__UBA1417  |
| ME                                                                                           |
| S14_vs_61530                                                                                 |
| n.a.                                                                                         |
| n.a.                                                                                         |
| n.a.                                                                                         |
| n.a.                                                                                         |
| Shared                                                                                       |
| S12_vs_79666                                                                                 |
| n.a.                                                                                         |
| n.a.                                                                                         |
| n.a.                                                                                         |
| n.a.                                                                                         |
| d__Bacteria;p__Firmicutes;c__Clostridia;o__Oscillospirales;f__Acetivibacteraceae;g__UBA1691  |
| ME                                                                                           |
| S5_vs_3501                                                                                   |
| Caudoviricetes                                                                               |
| Unclassified                                                                                 |
| O                                                                                            |
| O                                                                                            |
| S7_vs_129271                                                                                 |
| n.a.                                                                                         |
| n.a.                                                                                         |
| n.a.                                                                                         |
| n.a.                                                                                         |
| SHHC                                                                                         |
| S10_vs_36407                                                                                 |
| n.a.                                                                                         |
| n.a.                                                                                         |
| n.a.                                                                                         |
| n.a.                                                                                         |
| d__Bacteria;p__Firmicutes;c__Clostridia;o__Oscillospirales;f__Acetivibacteraceae;g__UBA737   |
| ME                                                                                           |
| S3_vs_95574                                                                                  |
| n.a.                                                                                         |
| n.a.                                                                                         |
| n.a.                                                                                         |
| n.a.                                                                                         |
| d__Bacteria;p__Firmicutes;c__Clostridia;o__Oscillospirales;f__Acetivibacteraceae;g__UMGS1071 |
| ME                                                                                           |
| S9_vs_26179                                                                                  |

n.a.  
n.a.  
n.a.  
n.a.

Shared  
S6\_vs\_56490  
Caudoviricetes  
Unclassified  
O  
O

d\_Bacteria;p\_Firmicutes;c\_Clostridia;o\_Oscillospirales;f\_Acutalibacteraceae;g\_UMGS1591

ME  
S9\_vs\_90860  
Caudoviricetes  
Unclassified  
O  
O

d\_Bacteria;p\_Firmicutes;c\_Clostridia;o\_Oscillospirales;f\_Acutalibacteraceae;g\_UMGS263

ME  
S11\_vs\_3006  
Caudoviricetes  
Unclassified  
Unclassified  
O

d\_Bacteria;p\_Firmicutes;c\_Clostridia;o\_Oscillospirales;f\_Acutalibacteraceae;g\_UMGS856

ME  
S5\_vs\_140946  
n.a.  
n.a.  
n.a.  
n.a.

d\_Bacteria;p\_Firmicutes;c\_Clostridia;o\_Oscillospirales;f\_Butyricoccaceae;g\_Agathobaculum

ME  
S14\_vs\_112068  
n.a.  
n.a.  
n.a.  
n.a.  
S5\_vs\_43207  
Caudoviricetes  
Unclassified  
O  
O  
S5\_vs\_84574  
n.a.  
n.a.  
n.a.  
n.a.  
S7\_vs\_103530  
n.a.  
n.a.  
n.a.  
n.a.  
S9\_vs\_19689  
n.a.  
n.a.  
n.a.  
n.a.

Shared  
S6\_vs\_56492

n.a.  
n.a.  
n.a.  
n.a.

d\_Bacteria;p\_\_Firmicutes;c\_\_Clostridia;o\_\_Oscillospirales;f\_\_CAG-272;g\_\_CAG-272

ME  
S3\_vf\_127392  
Caudoviricetes  
Unclassified  
O  
O

d\_Bacteria;p\_\_Firmicutes;c\_\_Clostridia;o\_\_Oscillospirales;f\_\_CAG-272;g\_\_QALR01

SHHC  
S12\_vs\_188820  
n.a.  
n.a.  
n.a.  
n.a.

d\_Bacteria;p\_\_Firmicutes;c\_\_Clostridia;o\_\_Oscillospirales;f\_\_Oscillospiraceae;g\_\_

ME  
S13\_vs\_148294  
Caudoviricetes  
Unclassified  
O  
O

Shared  
S3\_vs\_54303  
Caudoviricetes  
Unclassified  
Unclassified  
Eponavirus  
S7\_vs\_4956  
Caudoviricetes  
Unclassified  
Unclassified  
Eponavirus

d\_Bacteria;p\_\_Firmicutes;c\_\_Clostridia;o\_\_Oscillospirales;f\_\_Oscillospiraceae;g\_\_An92

ME  
S9\_vs\_14235  
n.a.  
n.a.  
n.a.  
n.a.

S9\_vs\_84046  
Caudoviricetes  
Unclassified  
O  
O

d\_Bacteria;p\_\_Firmicutes;c\_\_Clostridia;o\_\_Oscillospirales;f\_\_Oscillospiraceae;g\_\_CAG-103

ME  
S5\_vs\_77593  
Caudoviricetes  
Unclassified  
O  
O  
S7\_vs\_5236  
Caudoviricetes  
Unclassified  
O  
O

Shared  
S7\_vf\_76463  
n.a.  
n.a.  
n.a.  
n.a.

d\_\_Bacteria;p\_\_Firmicutes;c\_\_Clostridia;o\_\_Oscillospirales;f\_\_Oscillospiraceae;g\_\_CAG-110

ME  
S5\_vs\_107105  
Caudoviricetes  
Unclassified  
O  
O

SHHC  
S10\_vs\_120541  
n.a.  
n.a.  
n.a.  
n.a.

d\_\_Bacteria;p\_\_Firmicutes;c\_\_Clostridia;o\_\_Oscillospirales;f\_\_Oscillospiraceae;g\_\_CAG-170

ME  
S1\_vf\_136526  
Caudoviricetes  
Unclassified  
Unclassified  
O  
S1\_vs\_117317  
Caudoviricetes  
Unclassified  
Unclassified  
O

Shared  
S1\_vf\_6272  
Caudoviricetes  
Unclassified  
Unclassified  
O

S12\_vf\_173208  
n.a.  
n.a.  
n.a.  
n.a.

S3\_vf\_82571  
Caudoviricetes  
Unclassified  
O  
O

SHHC  
S8\_vs\_51368  
n.a.  
n.a.  
n.a.  
n.a.  
S8\_vs\_54183  
Caudoviricetes  
Unclassified  
Unclassified  
O

d\_\_Bacteria;p\_\_Firmicutes;c\_\_Clostridia;o\_\_Oscillospirales;f\_\_Oscillospiraceae;g\_\_CAG-83

ME

S11\_vf\_33117

n.a.

n.a.

n.a.

n.a.

S11\_vf\_99751

n.a.

n.a.

n.a.

n.a.

S13\_vf\_109235

n.a.

n.a.

n.a.

n.a.

S13\_vs\_13129

Caudoviricetes

Unclassified

O

O

S14\_vs\_97835

n.a.

n.a.

n.a.

n.a.

S5\_vs\_74199

n.a.

n.a.

n.a.

n.a.

Shared

S12\_vs\_164056

n.a.

n.a.

n.a.

n.a.

S13\_vs\_35816

Caudoviricetes

Unclassified

Unclassified

Lagaffevirus

S8\_vf\_170878

Caudoviricetes

Unclassified

Unclassified

Toutatisvirus

S8\_vs\_125717

n.a.

n.a.

n.a.

n.a.

S9\_vf\_64844

Caudoviricetes

Unclassified

Unclassified

Lagaffevirus

d\_\_Bacteria;p\_\_Firmicutes;c\_\_Clostridia;o\_\_Oscillospirales;f\_\_Oscillospiraceae;g\_\_Dysosmobacter

ME

S11\_vs\_52577

Caudoviricetes

Unclassified  
Unclassified  
Mushuvirus

S7\_vs\_28150  
n.a.  
n.a.  
n.a.  
n.a.

S9\_vs\_69322  
n.a.  
n.a.  
n.a.  
n.a.

Shared  
S10\_vf\_120738  
n.a.  
n.a.  
n.a.  
n.a.  
S17\_vs\_127519  
n.a.  
n.a.  
n.a.  
n.a.

SHHC  
S8\_vs\_50431  
n.a.  
n.a.  
n.a.  
n.a.

d\_\_Bacteria;p\_\_Firmicutes;c\_\_Clostridia;o\_\_Oscillospirales;f\_\_Oscillospiraceae;g\_\_Enterenecus

ME  
S5\_vs\_117417  
n.a.  
n.a.  
n.a.  
n.a.

d\_\_Bacteria;p\_\_Firmicutes;c\_\_Clostridia;o\_\_Oscillospirales;f\_\_Oscillospiraceae;g\_\_ER4

ME  
S1\_vf\_22149  
n.a.  
n.a.  
n.a.  
n.a.  
S1\_vs\_143929  
n.a.  
n.a.  
n.a.  
n.a.  
S13\_vf\_150407  
Faserviricetes  
Inoviridae  
Unclassified  
Inovirus  
S3\_vs\_127411  
n.a.  
n.a.  
n.a.  
n.a.

Shared

S1\_vs\_155183  
Caudoviricetes  
Unclassified  
Unclassified  
O

S11\_vf\_104034  
Caudoviricetes  
Unclassified  
Unclassified  
O

S12\_vf\_18902  
Caudoviricetes  
Unclassified  
O  
O

S16\_vf\_6102  
Caudoviricetes  
Unclassified  
Unclassified  
Toutatisvirus

S16\_vf\_97279  
Caudoviricetes  
Unclassified  
Unclassified  
Eponavirus

S17\_vs\_103009  
n.a.  
n.a.  
n.a.  
n.a.

S3\_vf\_127400  
Caudoviricetes  
Unclassified  
Unclassified  
O

S4\_vs\_VIRSorter\_4959-cat\_2  
Caudoviricetes  
Unclassified  
O  
O

S5\_vf\_136076  
n.a.  
n.a.  
n.a.  
n.a.

SHHC  
S16\_vs\_78429  
Caudoviricetes  
Unclassified  
Unclassified  
O

d\_\_Bacteria;p\_\_Firmicutes;c\_\_Clostridia;o\_\_Oscillospirales;f\_\_Oscillospiraceae;g\_\_Evtepia

Shared  
S14\_vs\_117166  
n.a.  
n.a.  
n.a.  
n.a.

d\_\_Bacteria;p\_\_Firmicutes;c\_\_Clostridia;o\_\_Oscillospirales;f\_\_Oscillospiraceae;g\_\_Flavonifractor

ME

S11\_vf\_95067  
n.a.  
n.a.  
n.a.  
S13\_vf\_147589  
n.a.  
n.a.  
n.a.  
n.a.  
S14\_vf\_115736  
Caudoviricetes  
Unclassified  
Unclassified  
O  
S14\_vs\_3251  
n.a.  
n.a.  
n.a.  
n.a.  
S14\_vs\_56410  
Caudoviricetes  
Unclassified  
O  
O  
S5\_vs\_21778  
n.a.  
n.a.  
n.a.  
n.a.  
S5\_vs\_65490  
n.a.  
n.a.  
n.a.  
n.a.  
S5\_vs\_69980  
Caudoviricetes  
Unclassified  
O  
O  
S7\_vs\_83100  
Caudoviricetes  
Unclassified  
O  
O  
S7\_vs\_83474  
Caudoviricetes  
Unclassified  
Unclassified  
O  
S7\_vs\_94738  
Caudoviricetes  
Unclassified  
Unclassified  
O  
S9\_vs\_4558  
Caudoviricetes  
Unclassified  
O  
O



S9\_vs\_50439  
n.a.  
n.a.  
n.a.  
n.a.

Shared  
S4\_vs\_VIRSorter\_15837-cat\_2  
Caudoviricetes  
Unclassified  
O  
O

S4\_vs\_VIRSorter\_31196-circular-cat\_2  
n.a.  
n.a.  
n.a.  
n.a.

S4\_vs\_VIRSorter\_31560-circular-cat\_2  
Caudoviricetes  
Unclassified  
O  
O

S5\_vf\_21869  
Caudoviricetes  
Unclassified  
Unclassified  
O

S6\_vs\_15813  
n.a.  
n.a.  
n.a.  
n.a.

S8\_vf\_111790  
Caudoviricetes  
Unclassified  
O  
O

S8\_vf\_166403  
n.a.  
n.a.  
n.a.  
n.a.

SHHC  
S16\_vf\_173099  
n.a.  
n.a.  
n.a.  
n.a.

d\_Bacteria;p\_Firmicutes;c\_Clostridia;o\_Oscillospirales;f\_Oscillospiraceae;g\_Intestinimonas

ME  
S7\_vs\_118295  
n.a.  
n.a.  
n.a.  
n.a.

S7\_vs\_69630  
Caudoviricetes  
Unclassified  
O  
O  
S9\_vs\_5676

Caudoviricetes  
Unclassified  
O  
O  
Shared  
S12\_vs\_92868  
Caudoviricetes  
Unclassified  
O  
O  
S14\_vf\_109545  
n.a.  
n.a.  
n.a.  
n.a.  
S4\_vs\_VIRSorter\_30222-cat\_2  
Caudoviricetes  
Unclassified  
O  
O  
S5\_vs\_124035  
n.a.  
n.a.  
n.a.  
n.a.  
S7\_vs\_78507  
n.a.  
n.a.  
n.a.  
n.a.  
S8\_vf\_208110  
Caudoviricetes  
Unclassified  
O  
O  
S8\_vf\_55476  
n.a.  
n.a.  
n.a.  
n.a.

d\_\_Bacteria;p\_\_Firmicutes;c\_\_Clostridia;o\_\_Oscillospirales;f\_\_Oscillospiraceae;g\_\_Lawsonibacter

ME  
S11\_vs\_19892  
Caudoviricetes  
Unclassified  
Unclassified  
Eponavirus  
S14\_vs\_67094  
n.a.  
n.a.  
n.a.  
n.a.  
S14\_vs\_9676  
Caudoviricetes  
Unclassified  
O  
O  
S17\_vf\_97671  
Caudoviricetes  
Unclassified

|                                                                                                |
|------------------------------------------------------------------------------------------------|
| Unclassified                                                                                   |
| Mushuvirus                                                                                     |
| S7_vf_138019                                                                                   |
| n.a.                                                                                           |
| n.a.                                                                                           |
| n.a.                                                                                           |
| n.a.                                                                                           |
| Shared                                                                                         |
| S5_vf_103206                                                                                   |
| n.a.                                                                                           |
| n.a.                                                                                           |
| n.a.                                                                                           |
| n.a.                                                                                           |
| S8_vs_134805                                                                                   |
| Caudoviricetes                                                                                 |
| Unclassified                                                                                   |
| Unclassified                                                                                   |
| Mushuvirus                                                                                     |
| d__Bacteria;p__Firmicutes;c__Clostridia;o__Oscillospirales;f__Oscillospiraceae;g__UBA5446      |
| Shared                                                                                         |
| S16_vs_75108                                                                                   |
| n.a.                                                                                           |
| n.a.                                                                                           |
| n.a.                                                                                           |
| n.a.                                                                                           |
| d__Bacteria;p__Firmicutes;c__Clostridia;o__Oscillospirales;f__Oscillospiraceae;g__UBA9475      |
| SHHC                                                                                           |
| S8_vs_145173                                                                                   |
| Caudoviricetes                                                                                 |
| Unclassified                                                                                   |
| O                                                                                              |
| O                                                                                              |
| d__Bacteria;p__Firmicutes;c__Clostridia;o__Oscillospirales;f__Oscillospiraceae;g__UMGS1766     |
| Shared                                                                                         |
| S16_vs_20060                                                                                   |
| Caudoviricetes                                                                                 |
| Unclassified                                                                                   |
| Unclassified                                                                                   |
| O                                                                                              |
| d__Bacteria;p__Firmicutes;c__Clostridia;o__Oscillospirales;f__Ruminococcaceae;g__Anaerotruncus |
| ME                                                                                             |
| S5_vs_118168                                                                                   |
| n.a.                                                                                           |
| n.a.                                                                                           |
| n.a.                                                                                           |
| n.a.                                                                                           |
| S5_vs_130958                                                                                   |
| Caudoviricetes                                                                                 |
| Unclassified                                                                                   |
| O                                                                                              |
| O                                                                                              |
| S5_vs_32885                                                                                    |
| Caudoviricetes                                                                                 |
| Unclassified                                                                                   |
| O                                                                                              |
| O                                                                                              |
| d__Bacteria;p__Firmicutes;c__Clostridia;o__Oscillospirales;f__Ruminococcaceae;g__CAG-353       |
| Shared                                                                                         |
| S12_vs_133070                                                                                  |
| Caudoviricetes                                                                                 |

Unclassified  
O  
O  
d\_\_Bacteria;p\_\_Firmicutes;c\_\_Clostridia;o\_\_Oscillospirales;f\_\_Ruminococcaceae;g\_\_D5

---

Shared  
S3\_vf\_80287  
Caudoviricetes  
Unclassified  
O  
O  
d\_\_Bacteria;p\_\_Firmicutes;c\_\_Clostridia;o\_\_Oscillospirales;f\_\_Ruminococcaceae;g\_\_Faecalibacterium

---

ME  
S1\_vs\_23682  
Caudoviricetes  
Unclassified  
O  
O  
S11\_vs\_11994  
Caudoviricetes  
Unclassified  
O  
O  
S13\_vf\_54201  
Caudoviricetes  
Unclassified  
O  
O  
S14\_vs\_90934  
n.a.  
n.a.  
n.a.  
S17\_vs\_110666  
Caudoviricetes  
Unclassified  
O  
O  
S3\_vs\_42569  
Caudoviricetes  
Unclassified  
Unclassified  
Toutatisvirus  
S3\_vs\_68031  
Caudoviricetes  
Unclassified  
O  
O  
S5\_vs\_117319  
Caudoviricetes  
Unclassified  
Unclassified  
O  
S5\_vs\_124677  
Caudoviricetes  
Unclassified  
Unclassified  
O  
S5\_vs\_30490  
n.a.  
n.a.

n.a.  
n.a.  
S7\_vf\_84974  
**Caudoviricetes**  
Unclassified  
**O**  
O  
S7\_vs\_87279  
**Caudoviricetes**  
Unclassified  
**Unclassified**  
O  
S7\_vs\_97737  
**n.a.**  
n.a.  
**n.a.**  
n.a.  
**Shared**  
S12\_vs\_87088  
**Caudoviricetes**  
Unclassified  
**O**  
O  
S16\_vf\_108554  
**n.a.**  
n.a.  
**n.a.**  
n.a.  
S16\_vs\_132979  
**Caudoviricetes**  
Unclassified  
**O**  
O  
S16\_vs\_173141  
**n.a.**  
n.a.  
**n.a.**  
n.a.  
S3\_vf\_127409  
**Caudoviricetes**  
Unclassified  
**O**  
O  
S3\_vf\_99734  
**Caudoviricetes**  
Unclassified  
**Unclassified**  
Lagaffevirus  
S3\_vs\_87728  
**n.a.**  
n.a.  
**n.a.**  
n.a.  
S3\_vs\_90331  
**Caudoviricetes**  
Unclassified  
**Unclassified**  
O  
S4\_vs\_VIRSorter\_27316-cat\_2  
**Caudoviricetes**

Unclassified  
O  
O  
S5\_vf\_134040  
Caudoviricetes  
Unclassified  
Unclassified  
Mushuvirus  
S5\_vs\_130294  
n.a.  
n.a.  
n.a.  
n.a.  
S6\_vs\_1146  
Caudoviricetes  
Unclassified  
O  
O  
S6\_vs\_34453  
Caudoviricetes  
Unclassified  
Unclassified  
O  
S7\_vf\_39724  
Caudoviricetes  
Unclassified  
Unclassified  
Mushuvirus  
S7\_vs\_13370  
n.a.  
n.a.  
n.a.  
n.a.  
S7\_vs\_135322  
Caudoviricetes  
Unclassified  
Unclassified  
O  
S7\_vs\_26757  
n.a.  
n.a.  
n.a.  
n.a.  
SHHC  
S10\_vf\_24791  
Caudoviricetes  
Unclassified  
Unclassified  
Eponavirus  
S10\_vs\_46819  
Caudoviricetes  
Unclassified  
O  
O  
S12\_vs\_81729  
Caudoviricetes  
Unclassified  
O  
O  
S16\_vs\_18440

Caudoviricetes  
Unclassified  
Unclassified  
Toutatisvirus

S6\_vs\_53966

Caudoviricetes  
Unclassified  
O

O

S8\_vf\_101283

Caudoviricetes  
Unclassified  
Unclassified  
Toutatisvirus

S8\_vf\_187742

Caudoviricetes  
Unclassified  
O

O

S8\_vf\_208119

Malgrandaviricetes  
Microviridae  
Gokushovirinae  
Gokushovirus

S8\_vs\_179529

Caudoviricetes  
Unclassified  
Unclassified  
O

S8\_vs\_63277

Caudoviricetes  
Unclassified  
O  
O

d\_\_Bacteria;p\_\_Firmicutes;c\_\_Clostridia;o\_\_Oscillospirales;f\_\_Ruminococcaceae;g\_\_Gemmiger

ME

S1\_vf\_28398

n.a.  
n.a.  
n.a.  
n.a.

S1\_vs\_133577

Caudoviricetes  
Unclassified  
O  
O

S14\_vf\_117147

Caudoviricetes  
Unclassified  
O  
O

S3\_vs\_119771

Caudoviricetes  
Unclassified  
O  
O

S3\_vs\_127391

n.a.  
n.a.  
n.a.

n.a.  
S3\_vs\_15450  
Caudoviricetes  
Unclassified  
O  
O  
S7\_vs\_111831  
Caudoviricetes  
Unclassified  
O  
O  
Shared  
S4\_vs\_VIRSorter\_31976-circular-cat\_2  
n.a.  
n.a.  
n.a.  
n.a.  
S7\_vs\_42563  
n.a.  
n.a.  
n.a.  
n.a.

SHHC  
S16\_vs\_76823  
n.a.  
n.a.  
n.a.  
n.a.  
S8\_vf\_151384  
Caudoviricetes  
Unclassified  
Unclassified  
Eponavirus  
S8\_vf\_208126  
Caudoviricetes  
Unclassified  
O  
O  
S8\_vs\_102608  
n.a.  
n.a.  
n.a.  
n.a.

d\_\_Bacteria;p\_\_Firmicutes;c\_\_Clostridia;o\_\_Oscillospirales;f\_\_Ruminococcaceae;g\_\_Massilimalliae

ME  
S14\_vs\_73301  
Caudoviricetes  
Unclassified  
O  
O

Shared  
S16\_vs\_17493  
n.a.  
n.a.  
n.a.  
n.a.

SHHC  
S4\_vs\_VIRSorter\_4839-cat\_2  
Caudoviricetes  
Unclassified



O  
O

**d\_Bacteria;p\_\_Firmicutes;c\_\_Clostridia;o\_\_Oscillospirales;f\_\_Ruminococcaceae;g\_\_Massilloclostridium**

ME

S11\_vs\_13652  
Caudoviricetes  
Unclassified  
Unclassified  
O

**d\_Bacteria;p\_\_Firmicutes;c\_\_Clostridia;o\_\_Oscillospirales;f\_\_Ruminococcaceae;g\_\_Negativibacillus**

ME

S5\_vs\_128398  
Caudoviricetes  
Unclassified  
O  
O  
S9\_vs\_48347  
Caudoviricetes  
Unclassified  
Unclassified  
O

Shared

S11\_vs\_104064  
Caudoviricetes  
Unclassified  
O  
O  
S6\_vs\_46091  
Caudoviricetes  
Unclassified  
Unclassified  
O

**d\_Bacteria;p\_\_Firmicutes;c\_\_Clostridia;o\_\_Oscillospirales;f\_\_Ruminococcaceae;g\_\_Phoceae**

ME

S5\_vs\_145611  
Caudoviricetes  
Unclassified  
O  
O

**d\_Bacteria;p\_\_Firmicutes;c\_\_Clostridia;o\_\_Oscillospirales;f\_\_Ruminococcaceae;g\_\_QAMM01**

ME

S14\_vs\_101482  
n.a.  
n.a.  
n.a.  
n.a.

SHHC

S4\_vs\_VIRSorter\_31171-circular-cat\_2  
Caudoviricetes  
Unclassified  
O  
O

**d\_Bacteria;p\_\_Firmicutes;c\_\_Clostridia;o\_\_Oscillospirales;f\_\_Ruminococcaceae;g\_\_Ruminiclostridium\_E**

Shared

S7\_vs\_21521  
n.a.  
n.a.  
n.a.  
n.a.

**d\_Bacteria;p\_\_Firmicutes;c\_\_Clostridia;o\_\_Oscillospirales;f\_\_Ruminococcaceae;g\_\_Ruminococcus\_C**

ME  
S3\_vs\_29077  
Caudoviricetes  
Unclassified  
O  
O  
SHHC  
S4\_vs\_VIRSorter\_31972-circular-cat\_2  
Caudoviricetes  
Unclassified  
O  
O  
d\_Bacteria;p\_\_Firmicutes;c\_\_Clostridia;o\_\_Oscillospirales;f\_\_Ruminococcaceae;g\_\_Ruminococcus\_D

---

ME  
S14\_vf\_51134  
Caudoviricetes  
Unclassified  
O  
O  
S3\_vf\_8164  
Caudoviricetes  
Unclassified  
O  
O  
S7\_vf\_71527  
n.a.  
n.a.  
n.a.  
n.a.  
S7\_vf\_8332  
Caudoviricetes  
Unclassified  
O  
O  
Shared  
S10\_vs\_120570  
n.a.  
n.a.  
n.a.  
n.a.  
S16\_vs\_34021  
n.a.  
n.a.  
n.a.  
n.a.  
S17\_vf\_174033  
Caudoviricetes  
Unclassified  
O  
O  
S3\_vf\_111893  
Caudoviricetes  
Unclassified  
O  
O  
S7\_vf\_13614  
Caudoviricetes  
Unclassified  
O  
O

SHHC

S12\_vf\_181024

Caudoviricetes  
Unclassified  
O

O

S16\_vs\_107235

n.a.  
n.a.  
n.a.  
n.a.

S16\_vs\_48714

n.a.  
n.a.  
n.a.  
n.a.

S8\_vf\_161703

Caudoviricetes  
Unclassified  
O

O

d\_Bacteria;p\_\_Firmicutes;c\_\_Clostridia;o\_\_Oscillospirales;f\_\_Ruminococcaceae;g\_\_Ruthenibacterium

ME

S14\_vs\_14737

Caudoviricetes  
Unclassified  
O

O

S14\_vs\_38905

n.a.  
n.a.  
n.a.  
n.a.

S3\_vs\_25896

n.a.  
n.a.  
n.a.  
n.a.

S5\_vs\_121411

n.a.  
n.a.  
n.a.  
n.a.

S5\_vs\_13254

n.a.  
n.a.  
n.a.  
n.a.

S9\_vs\_66877

Caudoviricetes  
Unclassified  
O

O

Shared

S11\_vs\_76784

Caudoviricetes  
Unclassified  
O

O

S16\_vf\_169895

Caudoviricetes  
Salasmaviridae  
O  
O  
S5\_vs\_85065  
Caudoviricetes  
Unclassified  
O  
O  
SHHC  
S16\_vs\_103726  
n.a.  
n.a.  
n.a.  
n.a.  
S16\_vs\_81805  
Caudoviricetes  
Unclassified  
O  
O  
S6\_vs\_33711  
Caudoviricetes  
Unclassified  
Unclassified  
Unclassified  
d\_\_Bacteria;p\_\_Firmicutes;c\_\_Clostridia;o\_\_Oscillospirales;f\_\_Ruminococcaceae;g\_\_UBA3818  
SHHC  
S6\_vs\_38250  
Caudoviricetes  
Unclassified  
Unclassified  
Unclassified  
d\_\_Bacteria;p\_\_Firmicutes;c\_\_Clostridia;o\_\_Oscillospirales;f\_\_UMGS1783;g\_\_UMGS1783  
ME  
S7\_vs\_134391  
n.a.  
n.a.  
n.a.  
n.a.  
SHHC  
S12\_vs\_188828  
n.a.  
n.a.  
n.a.  
n.a.  
d\_\_Bacteria;p\_\_Firmicutes;c\_\_Clostridia;o\_\_Peptostreptococcales;f\_\_Anaerovoracaceae;g\_\_CAG-145  
Shared  
S10\_vs\_2538  
Caudoviricetes  
Unclassified  
O  
O  
d\_\_Bacteria;p\_\_Firmicutes;c\_\_Clostridia;o\_\_Peptostreptococcales;f\_\_Peptostreptococcaceae;g\_\_GCA-900066495  
Shared  
S3\_vf\_56363  
Caudoviricetes  
Unclassified  
O  
O  
SHHC

S4\_vs\_VIRSorter\_15112-cat\_2

n.a.

n.a.

n.a.

n.a.

d\_Bacteria;p\_\_Firmicutes;c\_\_Clostridia;o\_\_TANB77;f\_\_CAG-508;g\_\_CAG-269

SHHC

S12\_vs\_6836

Caudoviricetes

Unclassified

O

O

S16\_vf\_90328

Caudoviricetes

Unclassified

O

O

d\_Bacteria;p\_\_Firmicutes;c\_\_Clostridia;o\_\_TANB77;f\_\_CAG-508;g\_\_CAG-354

SHHC

S8\_vf\_13709

Caudoviricetes

Unclassified

O

O

S8\_vf\_13758

Caudoviricetes

Unclassified

O

O

d\_Bacteria;p\_\_Firmicutes;c\_\_Clostridia;o\_\_UBA1212;f\_\_UBA1255;g\_\_Egerieisoma

ME

S5\_vs\_850

n.a.

n.a.

n.a.

n.a.

d\_Bacteria;p\_\_Firmicutes;c\_\_Negativicutes;o\_\_Acidaminococcales;f\_\_Acidaminococcaceae;g\_\_Phascolarctobacterium

SHHC

S8\_vf\_208146

Malgrandaviricetes

Microviridae

Gokushovirinae

Unclassified

d\_Bacteria;p\_\_Firmicutes;c\_\_Negativicutes;o\_\_Veillonellales;f\_\_Dialisteraceae;g\_\_Dialister

ME

S7\_vs\_134784

Caudoviricetes

Unclassified

O

O

S9\_vs\_67792

Caudoviricetes

Unclassified

O

O

d\_Bacteria;p\_\_Firmicutes;c\_\_Negativicutes;o\_\_Veillonellales;f\_\_Megasphaeraceae;g\_\_Caecibacter

SHHC

S8\_vs\_147670

Caudoviricetes

Unclassified

O  
O

**d\_Bacteria;p\_Firmicutes;c\_Negativicutes;o\_Veillonellales;f\_Veillonellaceae;g\_Veillonella**

ME  
S5\_vf\_8808  
Caudoviricetes  
Unclassified

O  
O

**d\_Bacteria;p\_Patescibacteria;c\_Paceibacteria;o\_UBA9983\_A;f\_UBA1006;g\_01-FULL-36-10b**

Shared  
S4\_vf\_31973  
n.a.  
n.a.  
n.a.  
n.a.

**d\_Bacteria;p\_Proteobacteria;c\_Alphaproteobacteria;o\_RF32;f\_CAG-239;g\_51-20**

ME  
S11\_vs\_84627  
n.a.  
n.a.  
n.a.  
n.a.

Shared  
S13\_vs\_45488  
Caudoviricetes  
Unclassified

O  
O

S6\_vs\_44070  
n.a.  
Unclassified  
O  
O

**d\_Bacteria;p\_Proteobacteria;c\_Alphaproteobacteria;o\_RF32;f\_CAG-239;g\_CAG-267**

Shared  
S11\_vs\_6458  
n.a.  
n.a.  
n.a.  
S13\_vs\_9438  
n.a.  
n.a.  
n.a.  
S5\_vs\_9747  
n.a.  
n.a.  
n.a.  
S6\_vs\_39065  
n.a.  
n.a.  
n.a.  
n.a.

**d\_Bacteria;p\_Proteobacteria;c\_Alphaproteobacteria;o\_RF32;f\_CAG-239;g\_CAG-495**

ME  
S17\_vs\_8690  
n.a.

|                                                                                                                |
|----------------------------------------------------------------------------------------------------------------|
| n.a.                                                                                                           |
| n.a.                                                                                                           |
| n.a.                                                                                                           |
| SHHC                                                                                                           |
| S12_vs_153780                                                                                                  |
| Caudoviricetes                                                                                                 |
| Unclassified                                                                                                   |
| O                                                                                                              |
| O                                                                                                              |
| d__Bacteria;p__Proteobacteria;c__Gammaproteobacteria;o__Burkholderiales;f__Burkholderiaceae;g__Duodenibacillus |
| SHHC                                                                                                           |
| S4_vs_VIRSorter_31980-circular-cat_2                                                                           |
| Caudoviricetes                                                                                                 |
| Unclassified                                                                                                   |
| Unclassified                                                                                                   |
| Unclassified                                                                                                   |
| d__Bacteria;p__Proteobacteria;c__Gammaproteobacteria;o__Burkholderiales;f__Burkholderiaceae;g__Parasutterella  |
| SHHC                                                                                                           |
| S12_vs_93357                                                                                                   |
| Caudoviricetes                                                                                                 |
| Unclassified                                                                                                   |
| O                                                                                                              |
| O                                                                                                              |
| S16_vs_120622                                                                                                  |
| Caudoviricetes                                                                                                 |
| Unclassified                                                                                                   |
| O                                                                                                              |
| O                                                                                                              |
| d__Bacteria;p__Proteobacteria;c__Gammaproteobacteria;o__Burkholderiales;f__Burkholderiaceae;g__Sutterella      |
| ME                                                                                                             |
| S14_vs_2870                                                                                                    |
| Caudoviricetes                                                                                                 |
| Unclassified                                                                                                   |
| O                                                                                                              |
| O                                                                                                              |
| S3_vs_51931                                                                                                    |
| Malgrandaviricetes                                                                                             |
| Microviridae                                                                                                   |
| Gokushovirinae                                                                                                 |
| O                                                                                                              |
| S7_vs_48523                                                                                                    |
| Caudoviricetes                                                                                                 |
| Unclassified                                                                                                   |
| O                                                                                                              |
| O                                                                                                              |
| d__Bacteria;p__Proteobacteria;c__Gammaproteobacteria;o__Enterobacterales;f__Enterobacteriaceae;g__Escherichia  |
| ME                                                                                                             |
| S5_vf_74661                                                                                                    |
| Caudoviricetes                                                                                                 |
| Unclassified                                                                                                   |
| Unclassified                                                                                                   |
| Unclassified                                                                                                   |
| S5_vs_130032                                                                                                   |
| Caudoviricetes                                                                                                 |
| Unclassified                                                                                                   |
| O                                                                                                              |
| O                                                                                                              |
| Shared                                                                                                         |
| S13_vf_151045                                                                                                  |
| Caudoviricetes                                                                                                 |

|                                                                                                             |
|-------------------------------------------------------------------------------------------------------------|
| Unclassified                                                                                                |
| O                                                                                                           |
| O                                                                                                           |
| d_Bacteria;p__Proteobacteria;c__Gammaproteobacteria;o__Enterobacterales;f__Enterobacteriaceae;g__Salmonella |
| ME                                                                                                          |
| S11_vs_5077                                                                                                 |
| Caudoviricetes                                                                                              |
| Peduviridae                                                                                                 |
| Unclassified                                                                                                |
| Quadrangitavirus                                                                                            |
| d_Bacteria;p__Proteobacteria;c__Gammaproteobacteria;o__Enterobacterales;f__Pasteurellaceae;g__Glaesserella  |
| SHHC                                                                                                        |
| S12_vf_10887                                                                                                |
| n.a.                                                                                                        |
| n.a.                                                                                                        |
| n.a.                                                                                                        |
| n.a.                                                                                                        |
| d_Bacteria;p__Spirochaetota;c__Spirochaetia;o__Sphaerochaetales;f__Sphaerochaetaceae;g__UBA9732             |
| Shared                                                                                                      |
| S3_vf_115304                                                                                                |
| Caudoviricetes                                                                                              |
| Suoliviridae                                                                                                |
| Uncouvirinae                                                                                                |
| Aurodevirus                                                                                                 |
| d_Bacteria;p__Verrucomicrobiota;c__Lentisphaeria;o__Victivallales;f__Victivallaceae;g__Victivallis          |
| ME                                                                                                          |
| S7_vs_87439                                                                                                 |
| n.a.                                                                                                        |
| n.a.                                                                                                        |
| n.a.                                                                                                        |
| n.a.                                                                                                        |
| d_Bacteria;p__Verrucomicrobiota;c__Verrucomicrobiae;o__Verrucomicrobiales;f__Akkermansiaceae;g__Akkermansia |
| ME                                                                                                          |
| S13_vf_7670                                                                                                 |
| n.a.                                                                                                        |
| n.a.                                                                                                        |
| n.a.                                                                                                        |
| n.a.                                                                                                        |
| S5_vs_86562                                                                                                 |
| Caudoviricetes                                                                                              |
| Unclassified                                                                                                |
| O                                                                                                           |
| O                                                                                                           |
| S7_vs_29595                                                                                                 |
| Caudoviricetes                                                                                              |
| Unclassified                                                                                                |
| O                                                                                                           |
| O                                                                                                           |
| Shared                                                                                                      |
| S16_vs_173096                                                                                               |
| Caudoviricetes                                                                                              |
| Unclassified                                                                                                |
| Unclassified                                                                                                |
| Unclassified                                                                                                |
| S6_vf_25710                                                                                                 |
| n.a.                                                                                                        |
| n.a.                                                                                                        |
| n.a.                                                                                                        |
| n.a.                                                                                                        |
| SHHC                                                                                                        |



S12\_vs\_86928  
Caudoviricetes  
Unclassified  
O  
O

| Table S9-6. WMS_Hosts_pivot                                                                                  | Host interactions with: | # Hosts |
|--------------------------------------------------------------------------------------------------------------|-------------------------|---------|
| d__Bacteria;p__Actinobacteriota;r__Actinomycetia;o__Actinomycetales;f__Bifidobacteriaceae;g__Bifidobacterium | ME-viruses-only         | 22      |
| ME                                                                                                           | SHHC-viruses-only       | 23      |
|                                                                                                              | Shared/communal viruses | 61      |
| S17-wms-combined_186314                                                                                      |                         |         |
| Caudoviricetes                                                                                               |                         |         |
| Unclassified                                                                                                 |                         |         |
| O                                                                                                            |                         |         |
| O                                                                                                            |                         |         |
| S1-wms-combined_307323                                                                                       |                         |         |
| Caudoviricetes                                                                                               |                         |         |
| Unclassified                                                                                                 |                         |         |
| O                                                                                                            |                         |         |
| O                                                                                                            |                         |         |
| S1-wms-combined_331544                                                                                       |                         |         |
| n.a.                                                                                                         |                         |         |
| n.a.                                                                                                         |                         |         |
| n.a.                                                                                                         |                         |         |
| S1-wms-combined_85225                                                                                        |                         |         |
| Caudoviricetes                                                                                               |                         |         |
| Unclassified                                                                                                 |                         |         |
| O                                                                                                            |                         |         |
| O                                                                                                            |                         |         |
| S3-wms_94494                                                                                                 |                         |         |
| Caudoviricetes                                                                                               |                         |         |
| Unclassified                                                                                                 |                         |         |
| O                                                                                                            |                         |         |
| O                                                                                                            |                         |         |
| S3-wms-combined_135428                                                                                       |                         |         |
| Caudoviricetes                                                                                               |                         |         |
| Unclassified                                                                                                 |                         |         |
| O                                                                                                            |                         |         |
| O                                                                                                            |                         |         |
| S7-wms_157264                                                                                                |                         |         |
| n.a.                                                                                                         |                         |         |
| Unclassified                                                                                                 |                         |         |
| Unclassified                                                                                                 |                         |         |
| Unclassified                                                                                                 |                         |         |
| S7-wms-combined_136642                                                                                       |                         |         |
| n.a.                                                                                                         |                         |         |
| n.a.                                                                                                         |                         |         |
| n.a.                                                                                                         |                         |         |
| S7-wms-combined_143218                                                                                       |                         |         |
| n.a.                                                                                                         |                         |         |
| n.a.                                                                                                         |                         |         |
| n.a.                                                                                                         |                         |         |
| S7-wms-combined_147158                                                                                       |                         |         |
| Caudoviricetes                                                                                               |                         |         |
| Unclassified                                                                                                 |                         |         |
| O                                                                                                            |                         |         |
| O                                                                                                            |                         |         |
| S7-wms-combined_167867                                                                                       |                         |         |
| n.a.                                                                                                         |                         |         |
| Shared                                                                                                       |                         |         |
| S4-wms-combined_17284                                                                                        |                         |         |
| Caudoviricetes                                                                                               |                         |         |
| Unclassified                                                                                                 |                         |         |
| Unclassified                                                                                                 |                         |         |
| Unclassified                                                                                                 |                         |         |
| S4-wms-combined_51079                                                                                        |                         |         |
| n.a.                                                                                                         |                         |         |
| S5-wms-combined_117213                                                                                       |                         |         |
| Caudoviricetes                                                                                               |                         |         |
| Unclassified                                                                                                 |                         |         |
| O                                                                                                            |                         |         |
| O                                                                                                            |                         |         |
| S5-wms-combined_39793                                                                                        |                         |         |

|                                                                                                           |
|-----------------------------------------------------------------------------------------------------------|
| n.a.                                                                                                      |
| n.a.                                                                                                      |
| n.a.                                                                                                      |
| S7-wms-combined_174935                                                                                    |
| Caudoviricetes                                                                                            |
| Unclassified                                                                                              |
| O                                                                                                         |
| O                                                                                                         |
| S9-wms-combined_76274                                                                                     |
| Caudoviricetes                                                                                            |
| Unclassified                                                                                              |
| O                                                                                                         |
| O                                                                                                         |
| SHHC                                                                                                      |
| S4-wms_161443                                                                                             |
| n.a.                                                                                                      |
| Unclassified                                                                                              |
| Unclassified                                                                                              |
| Unclassified                                                                                              |
| d__Bacteria;p__Actinobacteriota;c__Coriobacteriia;o__Coriobacteriales;f__Coriobacteriaceae;g__Collinsella |
| ME                                                                                                        |
| S5-wms_94965                                                                                              |
| Caudoviricetes                                                                                            |
| Unclassified                                                                                              |
| Unclassified                                                                                              |
| Unclassified                                                                                              |
| Shared                                                                                                    |
| S7-wms-combined_189250                                                                                    |
| Caudoviricetes                                                                                            |
| Unclassified                                                                                              |
| Unclassified                                                                                              |
| Unclassified                                                                                              |
| S7-wms-combined_190281                                                                                    |
| n.a.                                                                                                      |
| n.a.                                                                                                      |
| n.a.                                                                                                      |
| n.a.                                                                                                      |
| SHHC                                                                                                      |
| S4-wms-combined_22012                                                                                     |
| Caudoviricetes                                                                                            |
| Unclassified                                                                                              |
| O                                                                                                         |
| O                                                                                                         |
| d__Bacteria;p__Actinobacteriota;c__Coriobacteriia;o__Coriobacteriales;f__Eggerthellaceae;g__Adlercreutzia |
| SHHC                                                                                                      |
| S12-wms_184276                                                                                            |
| Caudoviricetes                                                                                            |
| Unclassified                                                                                              |
| O                                                                                                         |
| O                                                                                                         |
| d__Bacteria;p__Actinobacteriota;c__Coriobacteriia;o__Coriobacteriales;f__Eggerthellaceae;g__CAG-1427      |
| SHHC                                                                                                      |
| S4-wms_107182                                                                                             |
| n.a.                                                                                                      |
| n.a.                                                                                                      |
| n.a.                                                                                                      |
| n.a.                                                                                                      |
| d__Bacteria;p__Actinobacteriota;c__Coriobacteriia;o__Coriobacteriales;f__Eggerthellaceae;g__Eggerthella   |
| ME                                                                                                        |
| S17-wms-combined_225356                                                                                   |
| n.a.                                                                                                      |
| n.a.                                                                                                      |
| n.a.                                                                                                      |
| n.a.                                                                                                      |
| S5-wms_62679                                                                                              |
| Caudoviricetes                                                                                            |
| Unclassified                                                                                              |
| O                                                                                                         |
| O                                                                                                         |
| SHHC                                                                                                      |
| S2-wms_79304                                                                                              |
| Caudoviricetes                                                                                            |
| Unclassified                                                                                              |
| Unclassified                                                                                              |
| Dybvigvirus                                                                                               |

d\_\_Bacteria;p\_\_Bacteroidota;c\_\_Bacteroidia;o\_\_Bacteroidales;f\_\_Bacteroidaceae;g\_\_Bacteroides

---

ME

S11-wms\_320555

**Caudoviricetes**

Unclassified

**O**

O

S11-wms-combined\_195425

**Caudoviricetes**

Unclassified

**Unclassified**

Unclassified

S11-wms-combined\_41367

**n.a.**

n.a.

**n.a.**

n.a.

S17-wms\_124308

**Caudoviricetes**

Unclassified

**O**

O

S17-wms-combined\_158354

**n.a.**

n.a.

**n.a.**

n.a.

S17-wms-combined\_16309

**Caudoviricetes**

Unclassified

**O**

O

S1-wms\_208875

**Caudoviricetes**

Unclassified

**O**

O

S1-wms-combined\_330329

**Caudoviricetes**

Unclassified

**O**

O

S7-wms\_244866

**Caudoviricetes**

Unclassified

**Unclassified**

Unclassified

S7-wms-combined\_135154

**n.a.**

n.a.

**n.a.**

n.a.

S7-wms-combined\_3669

**Malgrandaviricetes**

Microviridae

**O**

O

S7-wms-combined\_90393

**Caudoviricetes**

Unclassified

**O**

O

S7-wms-combined\_90728

**Caudoviricetes**

Unclassified

**O**

O

S9-wms-combined\_33229

**Caudoviricetes**

Unclassified

**O**

O

Shared

S11-wms-combined\_217790

**n.a.**

n.a.

n.a.  
n.a.  
S11-wms-combined\_321938  
**Caudoviricetes**  
Unclassified  
**O**  
O  
S11-wms-combined\_73204  
**n.a.**  
n.a.  
**n.a.**  
n.a.  
S12-wms-combined\_111524  
**n.a.**  
n.a.  
**n.a.**  
n.a.  
S12-wms-combined\_190114  
**Caudoviricetes**  
Unclassified  
**O**  
O  
S12-wms-combined\_201125  
**Caudoviricetes**  
Unclassified  
**O**  
O  
S12-wms-combined\_250551  
**Caudoviricetes**  
Unclassified  
**Unclassified**  
Unclassified  
S12-wms-combined\_297545  
**Caudoviricetes**  
Unclassified  
**O**  
O  
S12-wms-combined\_320727  
**Caudoviricetes**  
Unclassified  
**O**  
O  
S12-wms-combined\_368190  
**Caudoviricetes**  
Unclassified  
**O**  
O  
S12-wms-combined\_368562  
**Caudoviricetes**  
Unclassified  
**O**  
O  
S17-wms-combined\_106940  
**Caudoviricetes**  
Unclassified  
**O**  
O  
S17-wms-combined\_146050  
**n.a.**  
n.a.  
**n.a.**  
n.a.  
S17-wms-combined\_179771  
**n.a.**  
n.a.  
**n.a.**  
n.a.  
S17-wms-combined\_233761  
**n.a.**  
n.a.  
**n.a.**  
n.a.  
S17-wms-combined\_70983  
**n.a.**  
n.a.  
**n.a.**

n.a.  
S1-wms\_244836  
n.a.  
n.a.  
n.a.  
n.a.  
S1-wms-combined\_248622  
n.a.  
n.a.  
n.a.  
n.a.  
S1-wms-combined\_263562  
n.a.  
n.a.  
n.a.  
n.a.  
S2-wms\_156439  
**Caudoviricetes**  
Unclassified  
**O**  
O  
S2-wms-combined\_143737  
**Caudoviricetes**  
Duneviridae  
**O**  
O  
S2-wms-combined\_147065  
**Caudoviricetes**  
Unclassified  
**O**  
O  
S2-wms-combined\_210822  
n.a.  
n.a.  
n.a.  
n.a.  
S2-wms-combined\_229529  
**Caudoviricetes**  
Unclassified  
**O**  
O  
S2-wms-combined\_58121  
n.a.  
n.a.  
n.a.  
n.a.  
S3-wms-combined\_73262  
**Caudoviricetes**  
Unclassified  
**Unclassified**  
Unclassified  
S4-wms-combined\_83492  
**Caudoviricetes**  
Unclassified  
**O**  
O  
S5-wms\_85650  
n.a.  
n.a.  
n.a.  
n.a.  
S5-wms-combined\_207291  
n.a.  
n.a.  
n.a.  
n.a.  
S5-wms-combined\_59064  
**Caudoviricetes**  
Unclassified  
**Unclassified**  
Unclassified  
S5-wms-combined\_83370  
**Caudoviricetes**  
Unclassified  
**O**  
O

S5-wms-combined\_98202

n.a.  
n.a.  
n.a.  
n.a.

S6-wms-combined\_135223

n.a.  
n.a.  
n.a.  
n.a.

S6-wms-combined\_82597

n.a.  
n.a.  
n.a.  
n.a.

S7-wms-combined\_104872

n.a.  
n.a.  
n.a.  
n.a.

S7-wms-combined\_107679\_1

Caudoviricetes  
Unclassified  
O  
O

S7-wms-combined\_185016

Caudoviricetes  
Unclassified  
O  
O

S7-wms-combined\_239784

n.a.  
n.a.  
n.a.  
n.a.

S7-wms-combined\_43950

Caudoviricetes  
Unclassified  
Unclassified  
Unclassified

S7-wms-combined\_5625

Caudoviricetes  
Unclassified  
Unclassified  
Unclassified

S7-wms-combined\_62119

Caudoviricetes  
Unclassified  
Unclassified  
O

S7-wms-combined\_72070

n.a.  
n.a.  
n.a.  
n.a.

S8-wms-combined\_81597

Caudoviricetes  
Unclassified  
O  
O

S9-wms-combined\_33230

Caudoviricetes  
Unclassified  
O  
O

S9-wms-combined\_37587

Caudoviricetes  
Unclassified  
O  
O

S9-wms-combined\_44402

Caudoviricetes  
Unclassified  
O  
O

SHHC

S12-wms-combined\_91231

n.a.  
n.a.  
n.a.  
n.a.

S2-wms\_6424

Caudoviricetes  
Pachyviridae  
O  
O

S2-wms-combined\_132966

Faserviricetes  
Inoviridae  
Unclassified  
Inovirus

S8-wms-combined\_239791

Caudoviricetes  
Aggregaviridae  
O  
O

S8-wms-combined\_97848

Caudoviricetes  
Unclassified  
Unclassified  
Unclassified

d\_\_Bacteria;p\_\_Bacteroidota;c\_\_Bacteroidia;o\_\_Bacteroidales;f\_\_Bacteroidaceae;g\_\_Bacteroides\_G

ME

S17-wms\_254872

Malgrandaviricetes  
Microviridae  
Unclassified  
Microvirus

d\_\_Bacteria;p\_\_Bacteroidota;c\_\_Bacteroidia;o\_\_Bacteroidales;f\_\_Bacteroidaceae;g\_\_Prevotella

Shared

S2-wms\_128962

Caudoviricetes  
Suoliviridae  
O  
O

SHHC

S4-wms\_141607

Caudoviricetes  
Unclassified  
Unclassified  
Unclassified

S4-wms\_45128

n.a.  
n.a.  
n.a.  
n.a.

S4-wms\_50475

Caudoviricetes  
Unclassified  
O  
O

S4-wms-combined\_47565

n.a.  
n.a.  
n.a.  
n.a.

S4-wms-combined\_57123

n.a.  
n.a.  
n.a.  
n.a.

S6-wms\_138342

Caudoviricetes  
Suoliviridae  
O  
O

S8-wms-combined\_74275

Caudoviricetes  
Unclassified  
O  
O

d\_\_Bacteria;p\_\_Bacteroidota;c\_\_Bacteroidia;o\_\_Bacteroidales;f\_\_Bacteroidaceae;g\_\_Prevotellamassilia



Shared  
S12-wms\_12658  
Caudoviricetes  
Unclassified  
O  
O

d\_\_Bacteria;p\_\_Bacteroidota;c\_\_Bacteroidia;o\_\_Bacteroidales;f\_\_Barnesiellaceae;g\_\_Barnesiella

ME  
S1-wms\_153615  
n.a.  
n.a.  
n.a.  
n.a.  
S1-wms-combined\_153670  
n.a.  
n.a.  
n.a.  
S1-wms-combined\_357373  
Malgrandaviricetes  
Microviridae  
Unclassified  
Unclassified

Shared  
S12-wms-combined\_260036  
Caudoviricetes  
Steigviridae  
O  
O  
S12-wms-combined\_351847  
n.a.  
n.a.  
n.a.  
n.a.  
S9-wms-combined\_31456  
Caudoviricetes  
Unclassified  
Unclassified  
Unclassified

SHHC  
S12-wms-combined\_75733  
Malgrandaviricetes  
Microviridae  
O  
O  
S8-wms\_270  
Malgrandaviricetes  
Microviridae  
O  
O

d\_\_Bacteria;p\_\_Bacteroidota;c\_\_Bacteroidia;o\_\_Bacteroidales;f\_\_Muribaculaceae;g\_\_UBA7173

SHHC  
S12-wms-combined\_256299  
n.a.  
n.a.  
n.a.  
n.a.

d\_\_Bacteria;p\_\_Bacteroidota;c\_\_Bacteroidia;o\_\_Bacteroidales;f\_\_Rikenellaceae;g\_\_Alistipes

ME  
S11-wms\_330479  
n.a.  
Unclassified  
Unclassified  
Unclassified  
S11-wms-combined\_172889  
Caudoviricetes  
Unclassified  
O  
O  
S17-wms-combined\_253499  
n.a.  
n.a.  
n.a.  
n.a.  
S7-wms-combined\_163980  
n.a.

n.a.  
n.a.  
n.a.  
S9-wms-combined\_28805  
Caudoviricetes  
Winoviridae  
O  
O  
Shared  
S11-wms-combined\_125176  
Caudoviricetes  
Unclassified  
O  
O  
S11-wms-combined\_215723  
Caudoviricetes  
Duneviridae  
O  
O  
S11-wms-combined\_226165  
Caudoviricetes  
Unclassified  
O  
O  
S11-wms-combined\_48246  
Caudoviricetes  
Unclassified  
O  
O  
S11-wms-combined\_63818  
Caudoviricetes  
Unclassified  
O  
O  
S11-wms-combined\_64392  
Caudoviricetes  
Unclassified  
O  
O  
S11-wms-combined\_83571  
Caudoviricetes  
Winoviridae  
O  
O  
S11-wms-combined\_92114  
n.a.  
n.a.  
n.a.  
n.a.  
S12-wms\_386692  
n.a.  
n.a.  
n.a.  
n.a.  
S12-wms-combined\_189323  
Caudoviricetes  
Unclassified  
O  
O  
S12-wms-combined\_25459  
n.a.  
n.a.  
n.a.  
n.a.  
S12-wms-combined\_320262  
n.a.  
n.a.  
n.a.  
n.a.  
S12-wms-combined\_328554  
Caudoviricetes  
Unclassified  
O  
O  
S12-wms-combined\_358797  
Caudoviricetes

Unclassified  
O  
O  
S17-wms-combined\_199746  
Caudoviricetes  
Unclassified  
O  
O  
S1-wms\_394571  
Caudoviricetes  
Unclassified  
O  
O  
S1-wms-combined\_107766  
n.a.  
n.a.  
n.a.  
S1-wms-combined\_340558  
Caudoviricetes  
Unclassified  
O  
O  
S2-wms-combined\_113619  
Caudoviricetes  
Unclassified  
O  
O  
S2-wms-combined\_208559  
n.a.  
n.a.  
n.a.  
S4-wms-combined\_41490  
Caudoviricetes  
Unclassified  
O  
O  
S5-wms-combined\_178432  
n.a.  
n.a.  
n.a.  
S5-wms-combined\_210959  
Caudoviricetes  
Unclassified  
O  
O  
S5-wms-combined\_67650  
Caudoviricetes  
Unclassified  
O  
O  
S5-wms-combined\_90315  
Caudoviricetes  
Unclassified  
O  
O  
S6-wms-combined\_50721  
Caudoviricetes  
Winoviridae  
O  
O  
S6-wms-combined\_72228  
n.a.  
n.a.  
n.a.  
n.a.  
S6-wms-combined\_91039  
n.a.  
n.a.  
n.a.  
n.a.  
S7-wms-combined\_107679\_0  
Caudoviricetes  
Winoviridae

|                                                                                                  |   |
|--------------------------------------------------------------------------------------------------|---|
|                                                                                                  | O |
| S7-wms-combined_14267                                                                            | O |
| n.a.                                                                                             |   |
| n.a.                                                                                             |   |
| n.a.                                                                                             |   |
| S7-wms-combined_26217                                                                            |   |
| Caudoviricetes                                                                                   |   |
| Unclassified                                                                                     |   |
| O                                                                                                |   |
| O                                                                                                |   |
| S7-wms-combined_3697                                                                             |   |
| n.a.                                                                                             |   |
| Unclassified                                                                                     |   |
| O                                                                                                |   |
| O                                                                                                |   |
| S8-wms_58515                                                                                     |   |
| n.a.                                                                                             |   |
| n.a.                                                                                             |   |
| n.a.                                                                                             |   |
| n.a.                                                                                             |   |
| S8-wms-combined_26087                                                                            |   |
| Caudoviricetes                                                                                   |   |
| Unclassified                                                                                     |   |
| O                                                                                                |   |
| O                                                                                                |   |
| S8-wms-combined_270362                                                                           |   |
| Caudoviricetes                                                                                   |   |
| Unclassified                                                                                     |   |
| O                                                                                                |   |
| O                                                                                                |   |
| S9-wms-combined_5526                                                                             |   |
| Caudoviricetes                                                                                   |   |
| Unclassified                                                                                     |   |
| O                                                                                                |   |
| O                                                                                                |   |
| d__Bacteria;p__Bacteroidota;c__Bacteroidia;o__Bacteroidales;f__Rikenellaceae;g__Alistipes_A      |   |
| ME                                                                                               |   |
| S5-wms-combined_183113                                                                           |   |
| n.a.                                                                                             |   |
| n.a.                                                                                             |   |
| n.a.                                                                                             |   |
| n.a.                                                                                             |   |
| S5-wms-combined_204782                                                                           |   |
| n.a.                                                                                             |   |
| n.a.                                                                                             |   |
| n.a.                                                                                             |   |
| n.a.                                                                                             |   |
| Shared                                                                                           |   |
| S8-wms-combined_23583                                                                            |   |
| n.a.                                                                                             |   |
| n.a.                                                                                             |   |
| n.a.                                                                                             |   |
| n.a.                                                                                             |   |
| d__Bacteria;p__Bacteroidota;c__Bacteroidia;o__Bacteroidales;f__Rikenellaceae;g__Tidjanibacter    |   |
| Shared                                                                                           |   |
| S12-wms-combined_2450                                                                            |   |
| Caudoviricetes                                                                                   |   |
| Winoviridae                                                                                      |   |
| O                                                                                                |   |
| O                                                                                                |   |
| d__Bacteria;p__Bacteroidota;c__Bacteroidia;o__Bacteroidales;f__Tannerellaceae;g__Marseille-P3160 |   |
| SHHC                                                                                             |   |
| S4-wms-combined_14411                                                                            |   |
| Caudoviricetes                                                                                   |   |
| Unclassified                                                                                     |   |
| Unclassified                                                                                     |   |
| Unclassified                                                                                     |   |
| S6-wms_54578                                                                                     |   |
| Caudoviricetes                                                                                   |   |
| Unclassified                                                                                     |   |
| Unclassified                                                                                     |   |
| Unclassified                                                                                     |   |
| d__Bacteria;p__Bacteroidota;c__Bacteroidia;o__Bacteroidales;f__Tannerellaceae;g__Parabacteroides |   |
| ME                                                                                               |   |

|                                                                                                              |
|--------------------------------------------------------------------------------------------------------------|
| S17-wms-combined_171305                                                                                      |
| Caudoviricetes                                                                                               |
| Unclassified                                                                                                 |
| O                                                                                                            |
| O                                                                                                            |
| S5-wms-combined_94482                                                                                        |
| n.a.                                                                                                         |
| n.a.                                                                                                         |
| n.a.                                                                                                         |
| n.a.                                                                                                         |
| S7-wms_123954                                                                                                |
| n.a.                                                                                                         |
| n.a.                                                                                                         |
| n.a.                                                                                                         |
| n.a.                                                                                                         |
| Shared                                                                                                       |
| S1-wms-combined_32863                                                                                        |
| n.a.                                                                                                         |
| n.a.                                                                                                         |
| n.a.                                                                                                         |
| n.a.                                                                                                         |
| S1-wms-combined_394574                                                                                       |
| Caudoviricetes                                                                                               |
| Unclassified                                                                                                 |
| Unclassified                                                                                                 |
| Unclassified                                                                                                 |
| S2-wms-combined_75144                                                                                        |
| n.a.                                                                                                         |
| n.a.                                                                                                         |
| n.a.                                                                                                         |
| n.a.                                                                                                         |
| SHHC                                                                                                         |
| S4-wms_73990                                                                                                 |
| Caudoviricetes                                                                                               |
| Suoliviridae                                                                                                 |
| Boorivirinae                                                                                                 |
| Cohcovirus                                                                                                   |
| S4-wms-combined_10758                                                                                        |
| Caudoviricetes                                                                                               |
| Unclassified                                                                                                 |
| O                                                                                                            |
| O                                                                                                            |
| S8-wms-combined_180957                                                                                       |
| Caudoviricetes                                                                                               |
| Unclassified                                                                                                 |
| O                                                                                                            |
| O                                                                                                            |
| d_Bacteria;p_Bacteroidota;c_Bacteroidia;o_Bacteroidales;f_UBA11471;g_UBA11471                                |
| ME                                                                                                           |
| S1-wms-combined_246923                                                                                       |
| Caudoviricetes                                                                                               |
| Unclassified                                                                                                 |
| O                                                                                                            |
| O                                                                                                            |
| Shared                                                                                                       |
| S12-wms-combined_371541                                                                                      |
| n.a.                                                                                                         |
| n.a.                                                                                                         |
| n.a.                                                                                                         |
| n.a.                                                                                                         |
| S12-wms-combined_375343                                                                                      |
| n.a.                                                                                                         |
| n.a.                                                                                                         |
| n.a.                                                                                                         |
| n.a.                                                                                                         |
| d_Bacteria;p_Campylobacterota;c_Campylobacteriia;o_Campylobacteriales;f_Campylobacteraceae;g_Campylobacter_D |
| ME                                                                                                           |
| S5-wms-combined_106597                                                                                       |
| n.a.                                                                                                         |
| n.a.                                                                                                         |
| n.a.                                                                                                         |
| n.a.                                                                                                         |
| d_Bacteria;p_Cyanobacteria;c_Vampirotubridia;o_Gastranaerophilales;f_Gastranaerophilaceae;g_QAM01            |
| ME                                                                                                           |
| S5-wms-combined_199135                                                                                       |
| n.a.                                                                                                         |

|                                                                                                             |
|-------------------------------------------------------------------------------------------------------------|
| n.a.                                                                                                        |
| n.a.                                                                                                        |
| n.a.                                                                                                        |
| d_Bacteria;p_Desulfobacterota;c_Desulfovibrionia;o_Desulfovibrionales;f_Desulfovibrionaceae;g_Bilophila     |
| ME                                                                                                          |
| S1-wms-combined_143459                                                                                      |
| Caudoviricetes                                                                                              |
| Unclassified                                                                                                |
| O                                                                                                           |
| O                                                                                                           |
| S1-wms-combined_159544                                                                                      |
| Caudoviricetes                                                                                              |
| Peduviridae                                                                                                 |
| Unclassified                                                                                                |
| Phitrevirus                                                                                                 |
| S1-wms-combined_19031                                                                                       |
| Caudoviricetes                                                                                              |
| Unclassified                                                                                                |
| Unclassified                                                                                                |
| Unclassified                                                                                                |
| S1-wms-combined_231411                                                                                      |
| n.a.                                                                                                        |
| n.a.                                                                                                        |
| n.a.                                                                                                        |
| n.a.                                                                                                        |
| Shared                                                                                                      |
| S1-wms-combined_360285                                                                                      |
| Caudoviricetes                                                                                              |
| Unclassified                                                                                                |
| O                                                                                                           |
| O                                                                                                           |
| SHHC                                                                                                        |
| S6-wms-combined_119017                                                                                      |
| Caudoviricetes                                                                                              |
| Peduviridae                                                                                                 |
| Unclassified                                                                                                |
| Phitrevirus                                                                                                 |
| d_Bacteria;p_Desulfobacterota;c_Desulfovibrionia;o_Desulfovibrionales;f_Desulfovibrionaceae;g_Desulfovibrio |
| ME                                                                                                          |
| S11-wms-combined_268967                                                                                     |
| Caudoviricetes                                                                                              |
| Unclassified                                                                                                |
| Unclassified                                                                                                |
| Unclassified                                                                                                |
| S11-wms-combined_84326                                                                                      |
| Caudoviricetes                                                                                              |
| Unclassified                                                                                                |
| O                                                                                                           |
| O                                                                                                           |
| Shared                                                                                                      |
| S11-wms-combined_112733                                                                                     |
| Caudoviricetes                                                                                              |
| Unclassified                                                                                                |
| O                                                                                                           |
| O                                                                                                           |
| d_Bacteria;p_Firmicutes;c_Bacilli;o_Erysipelotrichales;f_Erysipelatoclostridiaceae;g_Erysipelatoclostridium |
| ME                                                                                                          |
| S7-wms-combined_169375                                                                                      |
| n.a.                                                                                                        |
| n.a.                                                                                                        |
| n.a.                                                                                                        |
| n.a.                                                                                                        |
| d_Bacteria;p_Firmicutes;c_Bacilli;o_Erysipelotrichales;f_Erysipelotrichaceae;g_Clostridium_AQ               |
| ME                                                                                                          |
| S5-wms-combined_156329                                                                                      |
| Caudoviricetes                                                                                              |
| Unclassified                                                                                                |
| O                                                                                                           |
| O                                                                                                           |
| S5-wms-combined_197186                                                                                      |
| n.a.                                                                                                        |
| n.a.                                                                                                        |
| n.a.                                                                                                        |
| n.a.                                                                                                        |
| d_Bacteria;p_Firmicutes;c_Bacilli;o_Lactobacillales;f_Lactobacillaceae;g_Lactocaseibacillus                 |
| ME                                                                                                          |

S5-wms\_212596

n.a.

n.a.

n.a.

n.a.

d\_Bacteria;p\_Firmicutes;c\_Bacilli;o\_Lactobacillales;f\_Streptococcaceae;g\_Streptococcus

ME

S9-wms\_19025

Caudoviricetes

Unclassified

O

O

S9-wms-combined\_20485

Caudoviricetes

Unclassified

Unclassified

O

d\_Bacteria;p\_Firmicutes;c\_Clostridia;o\_Christensenellales;f\_CAG-138;g\_SFEL01

SHHC

S12-wms-combined\_147628

Caudoviricetes

Unclassified

O

O

S8-wms-combined\_164289

n.a.

n.a.

n.a.

n.a.

S8-wms-combined\_264711

n.a.

n.a.

n.a.

n.a.

d\_Bacteria;p\_Firmicutes;c\_Clostridia;o\_Christensenellales;f\_CAG-138;g\_UBA1685

SHHC

S8-wms\_57121

n.a.

n.a.

n.a.

n.a.

S8-wms-combined\_146562

Caudoviricetes

Unclassified

O

O

S8-wms-combined\_211119

n.a.

n.a.

n.a.

n.a.

S8-wms-combined\_219796

Caudoviricetes

Unclassified

Unclassified

O

d\_Bacteria;p\_Firmicutes;c\_Clostridia;o\_Christensenellales;f\_CAG-74;g\_Firm-11

ME

S11-wms-combined\_267993

Caudoviricetes

Unclassified

O

O

d\_Bacteria;p\_Firmicutes;c\_Clostridia;o\_Christensenellales;f\_CAG-74;g\_Limiplasma

Shared

S8-wms-combined\_185611

n.a.

n.a.

n.a.

n.a.

d\_Bacteria;p\_Firmicutes;c\_Clostridia;o\_Christensenellales;f\_CAG-74;g\_SFFH01

Shared

S12-wms-combined\_299293

n.a.

n.a.

n.a.

|                                                                                                        |
|--------------------------------------------------------------------------------------------------------|
| n.a.                                                                                                   |
| d_Bacteria;p__Firmicutes;c__Clostridia;o__Christensenellales;f__CAG-74;g__UBA11524                     |
| Shared                                                                                                 |
| S12-wms-combined_151843                                                                                |
| Caudoviricetes                                                                                         |
| Unclassified                                                                                           |
| O                                                                                                      |
| O                                                                                                      |
| S12-wms-combined_293354                                                                                |
| Caudoviricetes                                                                                         |
| Unclassified                                                                                           |
| O                                                                                                      |
| O                                                                                                      |
| S1-wms_223620                                                                                          |
| Caudoviricetes                                                                                         |
| Unclassified                                                                                           |
| O                                                                                                      |
| O                                                                                                      |
| S1-wms-combined_302166                                                                                 |
| Caudoviricetes                                                                                         |
| Unclassified                                                                                           |
| O                                                                                                      |
| O                                                                                                      |
| S7-wms-combined_134452                                                                                 |
| n.a.                                                                                                   |
| n.a.                                                                                                   |
| n.a.                                                                                                   |
| n.a.                                                                                                   |
| S7-wms-combined_14529                                                                                  |
| Caudoviricetes                                                                                         |
| Unclassified                                                                                           |
| O                                                                                                      |
| O                                                                                                      |
| S8-wms-combined_215102                                                                                 |
| n.a.                                                                                                   |
| n.a.                                                                                                   |
| n.a.                                                                                                   |
| n.a.                                                                                                   |
| d_Bacteria;p__Firmicutes;c__Clostridia;o__Christensenellales;f__CAG-74;g__Ventricola                   |
| Shared                                                                                                 |
| S2-wms-combined_25727                                                                                  |
| Caudoviricetes                                                                                         |
| Unclassified                                                                                           |
| O                                                                                                      |
| O                                                                                                      |
| d_Bacteria;p__Firmicutes;c__Clostridia;o__Christensenellales;f__CAG-917;g__                            |
| SHHC                                                                                                   |
| S12-wms-combined_117447                                                                                |
| n.a.                                                                                                   |
| n.a.                                                                                                   |
| n.a.                                                                                                   |
| n.a.                                                                                                   |
| d_Bacteria;p__Firmicutes;c__Clostridia;o__Christensenellales;f__CAG-917;g__CAG-475                     |
| SHHC                                                                                                   |
| S12-wms-combined_164656                                                                                |
| n.a.                                                                                                   |
| n.a.                                                                                                   |
| n.a.                                                                                                   |
| n.a.                                                                                                   |
| d_Bacteria;p__Firmicutes;c__Clostridia;o__Christensenellales;f__Christensenellaceae;g__Christensenella |
| ME                                                                                                     |
| S5-wms-combined_66017                                                                                  |
| n.a.                                                                                                   |
| n.a.                                                                                                   |
| n.a.                                                                                                   |
| n.a.                                                                                                   |
| d_Bacteria;p__Firmicutes;c__Clostridia;o__Clostridiales;f__Clostridiaceae;g__Clostridium               |
| Shared                                                                                                 |
| S17-wms-combined_258087                                                                                |
| Caudoviricetes                                                                                         |
| Unclassified                                                                                           |
| Unclassified                                                                                           |
| O                                                                                                      |
| S2-wms-combined_58563                                                                                  |
| Caudoviricetes                                                                                         |
| Unclassified                                                                                           |



|                                                                                                 |
|-------------------------------------------------------------------------------------------------|
| Unclassified                                                                                    |
| O                                                                                               |
| d__Bacteria;p__Firmicutes;c__Clostridia;o__Eubacteriales;f__Eubacteriaceae;g__Eubacterium       |
| ME                                                                                              |
| S5-wms-combined_83412                                                                           |
| Caudoviricetes                                                                                  |
| Unclassified                                                                                    |
| Unclassified                                                                                    |
| Unclassified                                                                                    |
| d__Bacteria;p__Firmicutes;c__Clostridia;o__Lachnospirales;f__Anaerotignaceae;g__Anaerotignum    |
| ME                                                                                              |
| S9-wms-combined_3461                                                                            |
| n.a.                                                                                            |
| n.a.                                                                                            |
| n.a.                                                                                            |
| n.a.                                                                                            |
| Shared                                                                                          |
| S2-wms-combined_116221                                                                          |
| Caudoviricetes                                                                                  |
| Unclassified                                                                                    |
| O                                                                                               |
| O                                                                                               |
| S2-wms-combined_191613                                                                          |
| n.a.                                                                                            |
| n.a.                                                                                            |
| n.a.                                                                                            |
| n.a.                                                                                            |
| d__Bacteria;p__Firmicutes;c__Clostridia;o__Lachnospirales;f__Lachnospiraceae;g__Acetatifactor   |
| SHHC                                                                                            |
| S2-wms-combined_126440                                                                          |
| Caudoviricetes                                                                                  |
| Unclassified                                                                                    |
| O                                                                                               |
| O                                                                                               |
| S6-wms-combined_117756                                                                          |
| Caudoviricetes                                                                                  |
| Unclassified                                                                                    |
| Unclassified                                                                                    |
| Eponavirus                                                                                      |
| d__Bacteria;p__Firmicutes;c__Clostridia;o__Lachnospirales;f__Lachnospiraceae;g__Acetivibrio_A   |
| SHHC                                                                                            |
| S2-wms-combined_31084                                                                           |
| Caudoviricetes                                                                                  |
| Unclassified                                                                                    |
| O                                                                                               |
| O                                                                                               |
| d__Bacteria;p__Firmicutes;c__Clostridia;o__Lachnospirales;f__Lachnospiraceae;g__Agathobacter    |
| ME                                                                                              |
| S7-wms-combined_235165                                                                          |
| Caudoviricetes                                                                                  |
| Unclassified                                                                                    |
| Unclassified                                                                                    |
| Unclassified                                                                                    |
| Shared                                                                                          |
| S2-wms-combined_5791                                                                            |
| Caudoviricetes                                                                                  |
| Unclassified                                                                                    |
| O                                                                                               |
| O                                                                                               |
| SHHC                                                                                            |
| S2-wms-combined_207000                                                                          |
| Caudoviricetes                                                                                  |
| Unclassified                                                                                    |
| Unclassified                                                                                    |
| O                                                                                               |
| S2-wms-combined_222535                                                                          |
| n.a.                                                                                            |
| n.a.                                                                                            |
| n.a.                                                                                            |
| n.a.                                                                                            |
| d__Bacteria;p__Firmicutes;c__Clostridia;o__Lachnospirales;f__Lachnospiraceae;g__Anaerobutyricum |
| ME                                                                                              |
| S1-wms-combined_212892                                                                          |
| Caudoviricetes                                                                                  |
| Unclassified                                                                                    |
| O                                                                                               |

|                                                                                                |
|------------------------------------------------------------------------------------------------|
| O                                                                                              |
| S7-wms_151112                                                                                  |
| Caudoviricetes                                                                                 |
| Unclassified                                                                                   |
| O                                                                                              |
| O                                                                                              |
| S7-wms-combined_20921                                                                          |
| Caudoviricetes                                                                                 |
| Unclassified                                                                                   |
| O                                                                                              |
| O                                                                                              |
| d_Bacteria;p_Firmicutes;c_Clostridia;o_Lachnospirales;f_Lachnospiraceae;g_Anaerosacchariphilus |
| SHHC                                                                                           |
| S2-wms-combined_48661                                                                          |
| n.a.                                                                                           |
| n.a.                                                                                           |
| n.a.                                                                                           |
| n.a.                                                                                           |
| d_Bacteria;p_Firmicutes;c_Clostridia;o_Lachnospirales;f_Lachnospiraceae;g_Anaerostipes         |
| ME                                                                                             |
| S9-wms-combined_105462                                                                         |
| Caudoviricetes                                                                                 |
| Unclassified                                                                                   |
| O                                                                                              |
| O                                                                                              |
| d_Bacteria;p_Firmicutes;c_Clostridia;o_Lachnospirales;f_Lachnospiraceae;g_Bariatricus          |
| ME                                                                                             |
| S7-wms-combined_69024                                                                          |
| Caudoviricetes                                                                                 |
| Unclassified                                                                                   |
| O                                                                                              |
| O                                                                                              |
| d_Bacteria;p_Firmicutes;c_Clostridia;o_Lachnospirales;f_Lachnospiraceae;g_Blautia_A            |
| ME                                                                                             |
| S11-wms-combined_200084                                                                        |
| Caudoviricetes                                                                                 |
| Unclassified                                                                                   |
| O                                                                                              |
| O                                                                                              |
| S7-wms-combined_156351                                                                         |
| n.a.                                                                                           |
| n.a.                                                                                           |
| n.a.                                                                                           |
| n.a.                                                                                           |
| Shared                                                                                         |
| S2-wms_140933                                                                                  |
| Caudoviricetes                                                                                 |
| Unclassified                                                                                   |
| Unclassified                                                                                   |
| Unclassified                                                                                   |
| S5-wms-combined_26061                                                                          |
| Caudoviricetes                                                                                 |
| Unclassified                                                                                   |
| Unclassified                                                                                   |
| O                                                                                              |
| S9-wms-combined_10990                                                                          |
| n.a.                                                                                           |
| n.a.                                                                                           |
| n.a.                                                                                           |
| n.a.                                                                                           |
| SHHC                                                                                           |
| S2-wms-combined_176376                                                                         |
| Caudoviricetes                                                                                 |
| Unclassified                                                                                   |
| O                                                                                              |
| O                                                                                              |
| S4-wms_62635                                                                                   |
| Caudoviricetes                                                                                 |
| Unclassified                                                                                   |
| Unclassified                                                                                   |
| Unclassified                                                                                   |
| d_Bacteria;p_Firmicutes;c_Clostridia;o_Lachnospirales;f_Lachnospiraceae;g_CAG-81               |
| SHHC                                                                                           |
| S2-wms-combined_85381                                                                          |
| Caudoviricetes                                                                                 |
| Unclassified                                                                                   |

|                                                                                                |
|------------------------------------------------------------------------------------------------|
| Unclassified                                                                                   |
| Eponavirus                                                                                     |
| d__Bacteria;p__Firmicutes;c__Clostridia;o__Lachnospirales;f__Lachnospiraceae;g__COE1           |
| SHHC                                                                                           |
| S12-wms-combined_31761                                                                         |
| Caudoviricetes                                                                                 |
| Unclassified                                                                                   |
| Unclassified                                                                                   |
| O                                                                                              |
| d__Bacteria;p__Firmicutes;c__Clostridia;o__Lachnospirales;f__Lachnospiraceae;g__Dorea_A        |
| ME                                                                                             |
| S5-wms-combined_73301                                                                          |
| Caudoviricetes                                                                                 |
| Unclassified                                                                                   |
| O                                                                                              |
| O                                                                                              |
| Shared                                                                                         |
| S7-wms-combined_106253                                                                         |
| Caudoviricetes                                                                                 |
| Unclassified                                                                                   |
| O                                                                                              |
| O                                                                                              |
| SHHC                                                                                           |
| S4-wms-combined_64632                                                                          |
| Caudoviricetes                                                                                 |
| Unclassified                                                                                   |
| Unclassified                                                                                   |
| O                                                                                              |
| d__Bacteria;p__Firmicutes;c__Clostridia;o__Lachnospirales;f__Lachnospiraceae;g__Eisenbergiella |
| ME                                                                                             |
| S9-wms-combined_2042                                                                           |
| n.a.                                                                                           |
| n.a.                                                                                           |
| n.a.                                                                                           |
| n.a.                                                                                           |
| S9-wms-combined_97755                                                                          |
| Caudoviricetes                                                                                 |
| Unclassified                                                                                   |
| Unclassified                                                                                   |
| O                                                                                              |
| O                                                                                              |
| Shared                                                                                         |
| S2-wms-combined_200390                                                                         |
| Caudoviricetes                                                                                 |
| Unclassified                                                                                   |
| O                                                                                              |
| O                                                                                              |
| d__Bacteria;p__Firmicutes;c__Clostridia;o__Lachnospirales;f__Lachnospiraceae;g__Enterocloster  |
| ME                                                                                             |
| S17-wms-combined_223748                                                                        |
| n.a.                                                                                           |
| n.a.                                                                                           |
| n.a.                                                                                           |
| n.a.                                                                                           |
| S9-wms-combined_105822                                                                         |
| Caudoviricetes                                                                                 |
| Unclassified                                                                                   |
| Unclassified                                                                                   |
| O                                                                                              |
| O                                                                                              |
| Shared                                                                                         |
| S2-wms-combined_158821                                                                         |
| Caudoviricetes                                                                                 |
| Unclassified                                                                                   |
| Unclassified                                                                                   |
| O                                                                                              |
| O                                                                                              |
| S6-wms-combined_119138                                                                         |
| Caudoviricetes                                                                                 |
| Unclassified                                                                                   |
| O                                                                                              |
| O                                                                                              |
| S9-wms_64472                                                                                   |
| n.a.                                                                                           |
| n.a.                                                                                           |
| n.a.                                                                                           |
| n.a.                                                                                           |
| SHHC                                                                                           |
| S12-wms-combined_223043                                                                        |

|                                                                                               |
|-----------------------------------------------------------------------------------------------|
|                                                                                               |
| Caudoviricetes                                                                                |
| Unclassified                                                                                  |
| O                                                                                             |
| O                                                                                             |
| S6-wms_140743                                                                                 |
| Caudoviricetes                                                                                |
| Unclassified                                                                                  |
| O                                                                                             |
| O                                                                                             |
| d_Bacteria;p_Firmicutes;c_Clostridia;o_Lachnospirales;f_Lachnospiraceae;g_Eubacterium_I       |
| SHHC                                                                                          |
| S2-wms_192667                                                                                 |
| Caudoviricetes                                                                                |
| Unclassified                                                                                  |
| Unclassified                                                                                  |
| O                                                                                             |
| d_Bacteria;p_Firmicutes;c_Clostridia;o_Lachnospirales;f_Lachnospiraceae;g_Faecalimonas        |
| SHHC                                                                                          |
| S2-wms-combined_73327                                                                         |
| n.a.                                                                                          |
| n.a.                                                                                          |
| n.a.                                                                                          |
| n.a.                                                                                          |
| d_Bacteria;p_Firmicutes;c_Clostridia;o_Lachnospirales;f_Lachnospiraceae;g_Fusicatenibacter    |
| Shared                                                                                        |
| S7-wms-combined_123085                                                                        |
| n.a.                                                                                          |
| n.a.                                                                                          |
| n.a.                                                                                          |
| n.a.                                                                                          |
| d_Bacteria;p_Firmicutes;c_Clostridia;o_Lachnospirales;f_Lachnospiraceae;g_Lachnoclostridium_A |
| SHHC                                                                                          |
| S2-wms-combined_204225                                                                        |
| n.a.                                                                                          |
| n.a.                                                                                          |
| n.a.                                                                                          |
| n.a.                                                                                          |
| S2-wms-combined_74387                                                                         |
| Caudoviricetes                                                                                |
| Unclassified                                                                                  |
| O                                                                                             |
| O                                                                                             |
| S2-wms-combined_95987                                                                         |
| n.a.                                                                                          |
| n.a.                                                                                          |
| n.a.                                                                                          |
| n.a.                                                                                          |
| d_Bacteria;p_Firmicutes;c_Clostridia;o_Lachnospirales;f_Lachnospiraceae;g_Lachnospira         |
| ME                                                                                            |
| S1-wms-combined_100430                                                                        |
| Caudoviricetes                                                                                |
| Unclassified                                                                                  |
| Unclassified                                                                                  |
| O                                                                                             |
| O                                                                                             |
| Shared                                                                                        |
| S12-wms-combined_120133                                                                       |
| Caudoviricetes                                                                                |
| Unclassified                                                                                  |
| O                                                                                             |
| O                                                                                             |
| S2-wms_161986                                                                                 |
| Caudoviricetes                                                                                |
| Unclassified                                                                                  |
| Unclassified                                                                                  |
| O                                                                                             |
| S7-wms-combined_157260                                                                        |
| Caudoviricetes                                                                                |
| Unclassified                                                                                  |
| Unclassified                                                                                  |
| O                                                                                             |
| SHHC                                                                                          |
| S12-wms-combined_302876                                                                       |
| Caudoviricetes                                                                                |
| Unclassified                                                                                  |
| O                                                                                             |
| O                                                                                             |

d\_Bacteria;p\_Firmicutes;c\_Clostridia;o\_Lachnospirales;f\_Lachnospiraceae;g\_Mediterraneibacter

ME

S11-wms-combined\_282227

Caudoviricetes

Unclassified

O

O

S9-wms-combined\_26410

Caudoviricetes

Unclassified

O

O

Shared

S4-wms-combined\_121978

Caudoviricetes

Unclassified

O

O

S7-wms-combined\_157434

n.a.

n.a.

n.a.

n.a.

d\_Bacteria;p\_Firmicutes;c\_Clostridia;o\_Lachnospirales;f\_Lachnospiraceae;g\_Roseburia

Shared

S12-wms-combined\_259783

Caudoviricetes

Unclassified

Unclassified

Unclassified

S2-wms\_246296

n.a.

n.a.

n.a.

n.a.

S2-wms-combined\_157934

Caudoviricetes

Unclassified

Unclassified

O

S2-wms-combined\_218002

Caudoviricetes

Unclassified

O

O

S6-wms-combined\_32530

Caudoviricetes

Unclassified

O

O

SHHC

S2-wms-combined\_165833

Caudoviricetes

Unclassified

Unclassified

Mushuvirus

S4-wms-combined\_24659

n.a.

n.a.

n.a.

n.a.

S8-wms-combined\_217866

Caudoviricetes

Unclassified

Unclassified

Eponavirus

d\_Bacteria;p\_Firmicutes;c\_Clostridia;o\_Lachnospirales;f\_Lachnospiraceae;g\_UBA9502

Shared

S11-wms-combined\_179605

n.a.

n.a.

n.a.

n.a.

d\_Bacteria;p\_Firmicutes;c\_Clostridia;o\_Oscillospirales;f\_Acutalibacteraceae;g\_Acutalibacter

ME

S9-wms-combined\_27311

|                                                                                              |
|----------------------------------------------------------------------------------------------|
| n.a.                                                                                         |
| n.a.                                                                                         |
| n.a.                                                                                         |
| n.a.                                                                                         |
| d_Bacteria;p_Firmicutes;c_Clostridia;o_Oscillospirales;f_Acutalibacteraceae;g_CAG-180        |
| Shared                                                                                       |
| S7-wms-combined_218379                                                                       |
| Caudoviricetes                                                                               |
| Unclassified                                                                                 |
| O                                                                                            |
| O                                                                                            |
| d_Bacteria;p_Firmicutes;c_Clostridia;o_Oscillospirales;f_Acutalibacteraceae;g_CAG-217        |
| Shared                                                                                       |
| S12-wms-combined_117628                                                                      |
| Caudoviricetes                                                                               |
| Unclassified                                                                                 |
| Unclassified                                                                                 |
| O                                                                                            |
| S2-wms-combined_225908                                                                       |
| n.a.                                                                                         |
| Unclassified                                                                                 |
| O                                                                                            |
| O                                                                                            |
| d_Bacteria;p_Firmicutes;c_Clostridia;o_Oscillospirales;f_Acutalibacteraceae;g_Ruminococcus_E |
| ME                                                                                           |
| S7-wms-combined_28138                                                                        |
| Caudoviricetes                                                                               |
| Unclassified                                                                                 |
| O                                                                                            |
| O                                                                                            |
| Shared                                                                                       |
| S2-wms_130687                                                                                |
| Caudoviricetes                                                                               |
| Unclassified                                                                                 |
| Unclassified                                                                                 |
| Unclassified                                                                                 |
| Unclassified                                                                                 |
| S5-wms_49310                                                                                 |
| Caudoviricetes                                                                               |
| Unclassified                                                                                 |
| Unclassified                                                                                 |
| Unclassified                                                                                 |
| Unclassified                                                                                 |
| S5-wms-combined_108794                                                                       |
| Caudoviricetes                                                                               |
| Unclassified                                                                                 |
| Unclassified                                                                                 |
| O                                                                                            |
| S5-wms-combined_7292                                                                         |
| Caudoviricetes                                                                               |
| Unclassified                                                                                 |
| Unclassified                                                                                 |
| Unclassified                                                                                 |
| Unclassified                                                                                 |
| S9-wms-combined_9931                                                                         |
| Caudoviricetes                                                                               |
| Unclassified                                                                                 |
| Unclassified                                                                                 |
| O                                                                                            |
| d_Bacteria;p_Firmicutes;c_Clostridia;o_Oscillospirales;f_Acutalibacteraceae;g_UBA1417        |
| Shared                                                                                       |
| S5-wms-combined_117095                                                                       |
| n.a.                                                                                         |
| SHHC                                                                                         |
| S12-wms-combined_263377                                                                      |
| Caudoviricetes                                                                               |
| Unclassified                                                                                 |
| O                                                                                            |
| O                                                                                            |
| S12-wms-combined_264425                                                                      |
| n.a.                                                                                         |
| d_Bacteria;p_Firmicutes;c_Clostridia;o_Oscillospirales;f_Butyricocaceae;g_Agathobaculum      |
| SHHC                                                                                         |

S2-wms-combined\_199384

**Caudoviricetes**

Unclassified

**O**

**O**

**d\_Bacteria;p\_Firmicutes;c\_Clostridia;o\_Oscillospirales;f\_Oscillospiraceae;g\_**

**SHHC**

S2-wms-combined\_64692

**Caudoviricetes**

Unclassified

**Unclassified**

**O**

**d\_Bacteria;p\_Firmicutes;c\_Clostridia;o\_Oscillospirales;f\_Oscillospiraceae;g\_An92**

**ME**

S11-wms-combined\_119215

**Caudoviricetes**

Unclassified

**O**

**O**

S17-wms-combined\_79709

**Caudoviricetes**

Unclassified

**O**

**O**

**Shared**

S2-wms-combined\_137119

**Caudoviricetes**

Unclassified

**Unclassified**

**O**

S8-wms\_82880

**Caudoviricetes**

Unclassified

**Unclassified**

Brigitvirus

**d\_Bacteria;p\_Firmicutes;c\_Clostridia;o\_Oscillospirales;f\_Oscillospiraceae;g\_CAG-103**

**Shared**

S7-wms-combined\_139683

**Caudoviricetes**

Unclassified

**O**

**O**

S8-wms-combined\_40666

**n.a.**

**n.a.**

**n.a.**

**n.a.**

**d\_Bacteria;p\_Firmicutes;c\_Clostridia;o\_Oscillospirales;f\_Oscillospiraceae;g\_CAG-110**

**ME**

S1-wms-combined\_227003

**n.a.**

**n.a.**

**n.a.**

**n.a.**

**Shared**

S12-wms-combined\_264845

**n.a.**

**n.a.**

**n.a.**

**n.a.**

**d\_Bacteria;p\_Firmicutes;c\_Clostridia;o\_Oscillospirales;f\_Oscillospiraceae;g\_CAG-170**

**ME**

S1-wms\_130214

**Caudoviricetes**

Unclassified

**O**

**O**

**Shared**

S1-wms\_185046

**n.a.**

**n.a.**

**n.a.**

**n.a.**

S2-wms-combined\_238929

**Caudoviricetes**

Unclassified

O  
O  
S3-wms\_23958  
**Caudoviricetes**  
Unclassified  
O  
O  


---

d\_Bacteria;p\_Firmicutes;c\_Clostridia;o\_Oscillospirales;f\_Oscillospiraceae;g\_CAG-83  
ME  
S11-wms\_14390  
**n.a.**  
**n.a.**  
**n.a.**  
**n.a.**  
S1-wms-combined\_72167  
**Caudoviricetes**  
Unclassified  
O  
O  
Shared  
S11-wms-combined\_3507  
**Caudoviricetes**  
Unclassified  
O  
O  
S12-wms\_373775  
**n.a.**  
**n.a.**  
**n.a.**  
**n.a.**  
S12-wms-combined\_148741  
**n.a.**  
**n.a.**  
**n.a.**  
**n.a.**  
S12-wms-combined\_23517  
**Caudoviricetes**  
Unclassified  
O  
O  
S12-wms-combined\_270839  
**n.a.**  
**n.a.**  
**n.a.**  
**n.a.**  
S12-wms-combined\_334806  
**n.a.**  
**n.a.**  
**n.a.**  
**n.a.**  
S12-wms-combined\_63649  
**n.a.**  
**n.a.**  
**n.a.**  
**n.a.**  
S1-wms-combined\_169788  
**n.a.**  
**n.a.**  
**n.a.**  
**n.a.**  
S1-wms-combined\_373308  
**n.a.**  
**n.a.**  
**n.a.**  
**n.a.**  
S1-wms-combined\_57370  
**Caudoviricetes**  
Unclassified  
O  
O  
S1-wms-combined\_94988  
**n.a.**  
**n.a.**  
**n.a.**  
**n.a.**  
S2-wms-combined\_159670



n.a.  
n.a.  
n.a.  
n.a.  
S5-wms-combined\_134381  
Caudoviricetes  
Unclassified  
Unclassified  
Lagaffevirus  
S5-wms-combined\_179241  
n.a.  
n.a.  
n.a.  
n.a.  
S8-wms\_30498  
Caudoviricetes  
Unclassified  
Unclassified  
Mushuvirus  
S8-wms\_48935  
Caudoviricetes  
Unclassified  
Unclassified  
Toutatisvirus  
S8-wms-combined\_169835  
n.a.  
n.a.  
n.a.  
n.a.  
SHHC  
S12-wms-combined\_157167  
n.a.  
n.a.  
n.a.  
n.a.

d\_Bacteria;p\_Firmicutes;c\_Clostridia;o\_Oscillospirales;f\_Oscillospiraceae;g\_Dysosmobacter

ME  
S11-wms-combined\_283220  
Caudoviricetes  
Unclassified  
Unclassified  
Mushuvirus  
S11-wms-combined\_49632  
Caudoviricetes  
Unclassified  
O  
O

Shared  
S11-wms-combined\_116589  
n.a.  
n.a.  
n.a.  
n.a.  
S12-wms-combined\_184338  
Caudoviricetes  
Unclassified  
O  
O

S12-wms-combined\_329242  
n.a.  
n.a.  
n.a.  
n.a.  
S1-wms\_102342  
Caudoviricetes  
Unclassified  
O  
O

S5-wms-combined\_205046  
n.a.  
n.a.  
n.a.  
n.a.  
S6-wms-combined\_118427  
Caudoviricetes  
Unclassified

|                                                                                       |                |
|---------------------------------------------------------------------------------------|----------------|
|                                                                                       | Unclassified   |
|                                                                                       | O              |
| d__Bacteria;p__Firmicutes;c__Clostridia;o__Oscillospirales;f__Oscillospiraceae;g__ER4 |                |
| ME                                                                                    |                |
| S1-wms-combined_185336                                                                |                |
|                                                                                       | n.a.           |
|                                                                                       | n.a.           |
|                                                                                       | n.a.           |
|                                                                                       | n.a.           |
| S1-wms-combined_186878                                                                |                |
|                                                                                       | n.a.           |
|                                                                                       | n.a.           |
|                                                                                       | n.a.           |
|                                                                                       | n.a.           |
| S1-wms-combined_353757                                                                |                |
|                                                                                       | Caudoviricetes |
|                                                                                       | Unclassified   |
|                                                                                       | O              |
|                                                                                       | O              |
| S1-wms-combined_40115                                                                 |                |
|                                                                                       | n.a.           |
|                                                                                       | n.a.           |
|                                                                                       | n.a.           |
|                                                                                       | n.a.           |
| S1-wms-combined_41369                                                                 |                |
|                                                                                       | Caudoviricetes |
|                                                                                       | Unclassified   |
|                                                                                       | O              |
|                                                                                       | O              |
| Shared                                                                                |                |
| S12-wms-combined_129799                                                               |                |
|                                                                                       | Caudoviricetes |
|                                                                                       | Unclassified   |
|                                                                                       | Unclassified   |
|                                                                                       | O              |
| S12-wms-combined_210942                                                               |                |
|                                                                                       | n.a.           |
|                                                                                       | n.a.           |
|                                                                                       | n.a.           |
|                                                                                       | n.a.           |
| S12-wms-combined_393703                                                               |                |
|                                                                                       | n.a.           |
|                                                                                       | n.a.           |
|                                                                                       | n.a.           |
|                                                                                       | n.a.           |
| S12-wms-combined_48648                                                                |                |
|                                                                                       | n.a.           |
|                                                                                       | n.a.           |
|                                                                                       | n.a.           |
|                                                                                       | n.a.           |
| S1-wms_236105                                                                         |                |
|                                                                                       | Caudoviricetes |
|                                                                                       | Unclassified   |
|                                                                                       | O              |
|                                                                                       | O              |
| S1-wms_296850                                                                         |                |
|                                                                                       | Caudoviricetes |
|                                                                                       | Unclassified   |
|                                                                                       | Unclassified   |
|                                                                                       | Toutatisvirus  |
| S1-wms-combined_132934                                                                |                |
|                                                                                       | Caudoviricetes |
|                                                                                       | Unclassified   |
|                                                                                       | O              |
|                                                                                       | O              |
| S1-wms-combined_156637                                                                |                |
|                                                                                       | n.a.           |
|                                                                                       | n.a.           |
|                                                                                       | n.a.           |
|                                                                                       | n.a.           |
| S1-wms-combined_164485                                                                |                |
|                                                                                       | n.a.           |
|                                                                                       | n.a.           |
|                                                                                       | n.a.           |
|                                                                                       | n.a.           |
| S1-wms-combined_17651                                                                 |                |

n.a.  
n.a.  
n.a.  
S1-wms-combined\_331896  
n.a.  
n.a.  
n.a.  
S1-wms-combined\_351889  
Caudoviricetes  
Unclassified  
Unclassified  
O  
S2-wms-combined\_140996  
Caudoviricetes  
Unclassified  
Unclassified  
O  
S2-wms-combined\_93845  
Caudoviricetes  
Unclassified  
O  
O  
SHHC  
S12-wms\_235125  
n.a.  
n.a.  
n.a.  
n.a.  
S8-wms-combined\_134098  
n.a.  
n.a.  
n.a.  
n.a.  
S8-wms-combined\_246389  
Caudoviricetes  
Unclassified  
Unclassified  
O  
d\_Bacteria;p\_Firmicutes;c\_Clostridia;o\_Oscillospirales;f\_Oscillospiraceae;g\_Evtepia  
ME  
S17-wms-combined\_136622  
n.a.  
n.a.  
n.a.  
n.a.  
d\_Bacteria;p\_Firmicutes;c\_Clostridia;o\_Oscillospirales;f\_Oscillospiraceae;g\_F23-B02  
Shared  
S2-wms-combined\_52568  
n.a.  
n.a.  
n.a.  
n.a.  
S8-wms-combined\_68780  
n.a.  
n.a.  
n.a.  
n.a.  
SHHC  
S12-wms-combined\_129554  
Caudoviricetes  
Unclassified  
Unclassified  
Eponavirus  
d\_Bacteria;p\_Firmicutes;c\_Clostridia;o\_Oscillospirales;f\_Oscillospiraceae;g\_Faecousia  
Shared  
S11-wms-combined\_329493  
n.a.  
n.a.  
n.a.  
n.a.  
d\_Bacteria;p\_Firmicutes;c\_Clostridia;o\_Oscillospirales;f\_Oscillospiraceae;g\_Flavonifractor  
ME  
S17-wms-combined\_146850  
n.a.

n.a.  
n.a.  
n.a.  
S17-wms-combined\_157468  
n.a.  
n.a.  
n.a.  
S17-wms-combined\_175924  
Caudoviricetes  
Unclassified  
Unclassified  
Mushuvirus  
S17-wms-combined\_260343  
Caudoviricetes  
Unclassified  
Unclassified  
Toutatisvirus  
S17-wms-combined\_39687  
n.a.  
n.a.  
n.a.  
n.a.  
S17-wms-combined\_66123  
Caudoviricetes  
Unclassified  
Unclassified  
O  
S1-wms-combined\_374219  
n.a.  
n.a.  
n.a.  
n.a.  
S5-wms-combined\_163165  
n.a.  
n.a.  
n.a.  
n.a.  
Shared  
S11-wms-combined\_120257  
Caudoviricetes  
Unclassified  
Unclassified  
O  
S17-wms-combined\_185239  
n.a.  
n.a.  
n.a.  
n.a.  
S17-wms-combined\_247494  
Caudoviricetes  
Unclassified  
O  
O  
S2-wms-combined\_6605  
n.a.  
n.a.  
n.a.  
n.a.  
S5-wms-combined\_145067  
Caudoviricetes  
Unclassified  
O  
O  
S9-wms-combined\_122742  
n.a.  
n.a.  
n.a.  
n.a.  
S9-wms-combined\_124857  
n.a.  
n.a.  
n.a.  
n.a.

S17-wms-combined\_75892

Caudoviricetes

Unclassified

Unclassified

O

d\_Bacteria;p\_Firmicutes;c\_Clostridia;o\_Oscillospirales;f\_Oscillospiraceae;g\_Intestinimonas

ME

S11-wms-combined\_299954

n.a.

n.a.

n.a.

n.a.

Shared

S2-wms-combined\_122457

Caudoviricetes

Unclassified

Unclassified

O

S2-wms-combined\_196783

Caudoviricetes

Unclassified

O

O

S2-wms-combined\_24549

Caudoviricetes

Unclassified

O

O

S2-wms-combined\_72725

n.a.

n.a.

n.a.

n.a.

S5-wms\_52566

n.a.

n.a.

n.a.

n.a.

d\_Bacteria;p\_Firmicutes;c\_Clostridia;o\_Oscillospirales;f\_Oscillospiraceae;g\_Lawsonibacter

Shared

S17-wms-combined\_259811

Caudoviricetes

Unclassified

O

O

S1-wms\_4277

Caudoviricetes

Unclassified

Unclassified

Mushuvirus

S2-wms-combined\_126134

n.a.

n.a.

n.a.

n.a.

S5-wms\_10783

n.a.

n.a.

n.a.

n.a.

S7-wms-combined\_31068

n.a.

n.a.

n.a.

n.a.

d\_Bacteria;p\_Firmicutes;c\_Clostridia;o\_Oscillospirales;f\_Oscillospiraceae;g\_Marseille-P3106

ME

S17-wms-combined\_162786

n.a.

n.a.

n.a.

n.a.

Shared

S6-wms-combined\_41246

n.a.

n.a.

|                                                                                                       |
|-------------------------------------------------------------------------------------------------------|
| n.a.                                                                                                  |
| n.a.                                                                                                  |
| S7-wms-combined_84688                                                                                 |
| n.a.                                                                                                  |
| n.a.                                                                                                  |
| n.a.                                                                                                  |
| n.a.                                                                                                  |
| d_Bacteria;p__Firmicutes;c__Clostridia;o__Oscillospirales;f__Oscillospiraceae;g__Pseudoflavonifractor |
| ME                                                                                                    |
| S11-wms_32691                                                                                         |
| n.a.                                                                                                  |
| n.a.                                                                                                  |
| n.a.                                                                                                  |
| n.a.                                                                                                  |
| d_Bacteria;p__Firmicutes;c__Clostridia;o__Oscillospirales;f__Oscillospiraceae;g__UBA738               |
| Shared                                                                                                |
| S1-wms-combined_136097                                                                                |
| n.a.                                                                                                  |
| n.a.                                                                                                  |
| n.a.                                                                                                  |
| n.a.                                                                                                  |
| d_Bacteria;p__Firmicutes;c__Clostridia;o__Oscillospirales;f__Oscillospiraceae;g__UBA9475              |
| SHHC                                                                                                  |
| S8-wms-combined_25607                                                                                 |
| Caudoviricetes                                                                                        |
| Unclassified                                                                                          |
| O                                                                                                     |
| O                                                                                                     |
| d_Bacteria;p__Firmicutes;c__Clostridia;o__Oscillospirales;f__Ruminococcaceae;g__Faecalibacterium      |
| ME                                                                                                    |
| S17-wms-combined_90378                                                                                |
| Caudoviricetes                                                                                        |
| Unclassified                                                                                          |
| Unclassified                                                                                          |
| Lughvirus                                                                                             |
| S1-wms_29288                                                                                          |
| Caudoviricetes                                                                                        |
| Unclassified                                                                                          |
| O                                                                                                     |
| O                                                                                                     |
| S1-wms-combined_131270                                                                                |
| Caudoviricetes                                                                                        |
| Unclassified                                                                                          |
| O                                                                                                     |
| O                                                                                                     |
| S1-wms-combined_164894                                                                                |
| Caudoviricetes                                                                                        |
| Unclassified                                                                                          |
| O                                                                                                     |
| O                                                                                                     |
| S1-wms-combined_68998                                                                                 |
| Caudoviricetes                                                                                        |
| Unclassified                                                                                          |
| Unclassified                                                                                          |
| Taransivirus                                                                                          |
| Shared                                                                                                |
| S11-wms_3116                                                                                          |
| Caudoviricetes                                                                                        |
| Unclassified                                                                                          |
| Unclassified                                                                                          |
| Mushuvirus                                                                                            |
| S11-wms-combined_140009                                                                               |
| Caudoviricetes                                                                                        |
| Unclassified                                                                                          |
| Unclassified                                                                                          |
| Lughvirus                                                                                             |
| S11-wms-combined_236214                                                                               |
| Caudoviricetes                                                                                        |
| Unclassified                                                                                          |
| O                                                                                                     |
| O                                                                                                     |
| S17-wms-combined_193958                                                                               |
| Caudoviricetes                                                                                        |
| Unclassified                                                                                          |
| Unclassified                                                                                          |
| Mushuvirus                                                                                            |

S17-wms-combined\_56006  
Caudoviricetes  
Unclassified  
O  
O

S17-wms-combined\_56061  
n.a.  
n.a.  
n.a.  
n.a.

S1-wms-combined\_118167  
Caudoviricetes  
Unclassified  
O  
O

S1-wms-combined\_23248  
Caudoviricetes  
Unclassified  
Unclassified  
Lughvirus

S1-wms-combined\_285012  
Caudoviricetes  
Unclassified  
Unclassified  
O

S1-wms-combined\_304377  
Caudoviricetes  
Unclassified  
Unclassified  
Oengusvirus

S1-wms-combined\_52708  
n.a.  
n.a.  
n.a.  
n.a.

S2-wms\_124416  
Caudoviricetes  
Unclassified  
O  
O

S2-wms-combined\_13246  
Caudoviricetes  
Unclassified  
Unclassified  
O

S2-wms-combined\_166665  
Caudoviricetes  
Unclassified  
O  
O

S2-wms-combined\_181849  
n.a.  
n.a.  
n.a.  
n.a.

S2-wms-combined\_57293  
n.a.  
Unclassified  
O  
O

S3-wms\_22744  
Caudoviricetes  
Unclassified  
Unclassified  
Lagaffevirus

S4-wms-combined\_42647  
Caudoviricetes  
Unclassified  
Unclassified  
Lughvirus

S6-wms\_132588  
Caudoviricetes  
Unclassified  
O  
O

S6-wms-combined\_110950

n.a.  
n.a.  
n.a.  
S6-wms-combined\_126236  
Caudoviricetes  
Unclassified  
Unclassified  
Toutatisvirus  
S6-wms-combined\_138710  
n.a.  
n.a.  
n.a.  
n.a.  
S6-wms-combined\_56464  
Caudoviricetes  
Unclassified  
O  
O  
S7-wms\_113137  
Caudoviricetes  
Unclassified  
Unclassified  
Mushuvirus  
S7-wms-combined\_111004  
Caudoviricetes  
Unclassified  
Unclassified  
Taranisvirus  
S7-wms-combined\_137858  
n.a.  
n.a.  
n.a.  
n.a.  
SHHC  
S12-wms\_193565  
Caudoviricetes  
Unclassified  
Unclassified  
Mushuvirus  
S12-wms-combined\_264077  
Caudoviricetes  
Unclassified  
O  
O  
S12-wms-combined\_345948  
Caudoviricetes  
Unclassified  
Unclassified  
Lughvirus  
S12-wms-combined\_71235  
Caudoviricetes  
Unclassified  
Unclassified  
Lughvirus  
S2-wms-combined\_127080  
n.a.  
n.a.  
n.a.  
n.a.  
S6-wms-combined\_140731  
n.a.  
n.a.  
n.a.  
n.a.  
S6-wms-combined\_49909  
Caudoviricetes  
Unclassified  
O  
O  
S8-wms\_152831  
Caudoviricetes  
Unclassified  
Unclassified  
Toutatisvirus  
S8-wms\_190781



Caudoviricetes  
Unclassified  
O  
O  
S8-wms-combined\_225114

Caudoviricetes  
Unclassified  
O  
O

d\_Bacteria;p\_Firmicutes;c\_Clostridia;o\_Oscillospirales;f\_Ruminococcaceae;g\_Gemmiger

ME

S17-wms-combined\_72837

Caudoviricetes  
Unclassified  
O  
O

S1-wms-combined\_166392

Caudoviricetes  
Unclassified  
O  
O

S1-wms-combined\_220022

n.a.  
n.a.  
n.a.  
n.a.

S1-wms-combined\_227917

Caudoviricetes  
Unclassified  
O  
O

Shared

S11-wms-combined\_264050

Caudoviricetes  
Unclassified  
Unclassified  
O

S11-wms-combined\_46816

n.a.  
n.a.  
n.a.  
n.a.

S1-wms-combined\_279492

Caudoviricetes  
Unclassified  
O  
O

S2-wms-combined\_62839

Caudoviricetes  
Unclassified  
O  
O

S3-wms-combined\_45305

Caudoviricetes  
Unclassified  
O  
O

S4-wms-combined\_113721

n.a.  
n.a.  
n.a.  
n.a.

S7-wms-combined\_134458

Caudoviricetes  
Unclassified  
Unclassified  
Toutatisvirus

S8-wms-combined\_49369

n.a.  
n.a.  
n.a.  
n.a.

SHHC

S12-wms-combined\_323943

Caudoviricetes  
Unclassified

Unclassified  
O  
S8-wms\_20528  
Caudoviricetes  
Unclassified  
Unclassified  
O

---

d\_Bacteria;p\_Firmicutes;c\_Clostridia;o\_Oscillospirales;f\_Ruminococcaceae;g\_Negativibacillus

ME  
S9-wms-combined\_36459  
Caudoviricetes  
Unclassified  
O  
O  
Shared  
S7-wms-combined\_238231  
n.a.  
n.a.  
n.a.

---

d\_Bacteria;p\_Firmicutes;c\_Clostridia;o\_Oscillospirales;f\_Ruminococcaceae;g\_Ruminiclostridium\_E

ME  
S7-wms\_80255  
Caudoviricetes  
Unclassified  
O  
O  
Shared  
S11-wms-combined\_168048  
Caudoviricetes  
Unclassified  
O  
O

---

d\_Bacteria;p\_Firmicutes;c\_Clostridia;o\_Oscillospirales;f\_Ruminococcaceae;g\_Ruminococcus\_D

Shared  
S2-wms-combined\_101826  
Caudoviricetes  
Unclassified  
Unclassified  
Unclassified  
S7-wms\_127801  
Caudoviricetes  
Unclassified  
O  
O  
S7-wms-combined\_224523  
Caudoviricetes  
Unclassified  
O  
O  
S7-wms-combined\_71592  
Caudoviricetes  
Unclassified  
O  
O  
SHHC  
S12-wms\_223235  
n.a.  
n.a.  
n.a.  
n.a.  
S2-wms-combined\_30750  
n.a.  
n.a.  
n.a.  
n.a.

---

d\_Bacteria;p\_Firmicutes;c\_Clostridia;o\_Oscillospirales;f\_Ruminococcaceae;g\_Ruthenibacterium

ME  
S9-wms\_104169  
Faserviricetes  
Inoviridae  
Unclassified  
Inovirus  
Shared  
S5-wms-combined\_66662  
n.a.

|                                                                                                                 |
|-----------------------------------------------------------------------------------------------------------------|
| Unclassified                                                                                                    |
| Unclassified                                                                                                    |
| O                                                                                                               |
| S5-wms-combined_72410                                                                                           |
| Caudoviricetes                                                                                                  |
| Unclassified                                                                                                    |
| Unclassified                                                                                                    |
| O                                                                                                               |
| d_Bacteria;p__Firmicutes;c__Clostridia;o__Oscillospirales;f__Ruminococcaceae;g__UBA3818                         |
| SHHC                                                                                                            |
| S12-wms-combined_52101                                                                                          |
| Caudoviricetes                                                                                                  |
| Unclassified                                                                                                    |
| Unclassified                                                                                                    |
| O                                                                                                               |
| d_Bacteria;p__Firmicutes;c__Clostridia;o__Oscillospirales;f__Ruminococcaceae;g__UMGS363                         |
| Shared                                                                                                          |
| S12-wms_336780                                                                                                  |
| n.a.                                                                                                            |
| n.a.                                                                                                            |
| n.a.                                                                                                            |
| n.a.                                                                                                            |
| d_Bacteria;p__Firmicutes;c__Negativicutes;o__Acidaminococcales;f__Acidaminococcaceae;g__Phascolarctobacterium_A |
| SHHC                                                                                                            |
| S4-wms-combined_118531                                                                                          |
| Caudoviricetes                                                                                                  |
| Unclassified                                                                                                    |
| O                                                                                                               |
| O                                                                                                               |
| S4-wms-combined_57963                                                                                           |
| Caudoviricetes                                                                                                  |
| Unclassified                                                                                                    |
| Unclassified                                                                                                    |
| O                                                                                                               |
| d_Bacteria;p__Firmicutes;c__Negativicutes;o__Selenomonadales;f__Selenomonadaceae;g__Megamonas                   |
| SHHC                                                                                                            |
| S2-wms-combined_197577                                                                                          |
| Caudoviricetes                                                                                                  |
| Unclassified                                                                                                    |
| Unclassified                                                                                                    |
| Unclassified                                                                                                    |
| d_Bacteria;p__Firmicutes;c__Negativicutes;o__Veillonellales;f__Dialisteraceae;g__Dialister                      |
| Shared                                                                                                          |
| S17-wms-combined_95360                                                                                          |
| Caudoviricetes                                                                                                  |
| Unclassified                                                                                                    |
| O                                                                                                               |
| O                                                                                                               |
| S2-wms-combined_135014                                                                                          |
| Caudoviricetes                                                                                                  |
| Unclassified                                                                                                    |
| Unclassified                                                                                                    |
| O                                                                                                               |
| S2-wms-combined_135154                                                                                          |
| n.a.                                                                                                            |
| n.a.                                                                                                            |
| n.a.                                                                                                            |
| n.a.                                                                                                            |
| S2-wms-combined_185494                                                                                          |
| Caudoviricetes                                                                                                  |
| Autographiviridae                                                                                               |
| O                                                                                                               |
| O                                                                                                               |
| S7-wms-combined_74829                                                                                           |
| Caudoviricetes                                                                                                  |
| Unclassified                                                                                                    |
| O                                                                                                               |
| O                                                                                                               |
| S9-wms-combined_53991                                                                                           |
| Caudoviricetes                                                                                                  |
| Unclassified                                                                                                    |
| O                                                                                                               |
| O                                                                                                               |
| SHHC                                                                                                            |
| S6-wms-combined_65225                                                                                           |
| n.a.                                                                                                            |

n.a.  
n.a.  
n.a.  
**d\_Bacteria;p\_Firmicutes;x\_Negativicutes;o\_Veillonellales;f\_Veillonellaceae;g\_Veillonella**  
ME  
S9-wms\_114971  
Caudoviricetes  
Unclassified  
O  
O  
**d\_Bacteria;p\_Patescibacteria;c\_Paceibacteria;o\_Paceibacteriales;f\_UBA5633;g\_MWCK01**  
SHHC  
S12-wms\_401372  
Caudoviricetes  
Unclassified  
Unclassified  
Unclassified  
**d\_Bacteria;p\_Proteobacteria;c\_Alphaproteobacteria;o\_RF32;f\_CAG-239;g\_S1-20**  
ME  
S1-wms-combined\_92523  
n.a.  
Unclassified  
O  
O  
**d\_Bacteria;p\_Proteobacteria;c\_Alphaproteobacteria;o\_RF32;f\_CAG-239;g\_CAG-267**  
ME  
S11-wms-combined\_204522  
Caudoviricetes  
Unclassified  
O  
O  
Shared  
S11-wms-combined\_193148  
n.a.  
n.a.  
n.a.  
n.a.  
SHHC  
S6-wms-combined\_745  
n.a.  
n.a.  
n.a.  
n.a.  
**d\_Bacteria;p\_Proteobacteria;c\_Alphaproteobacteria;o\_RF32;f\_CAG-239;g\_CAG-495**  
Shared  
S11-wms-combined\_101337  
Caudoviricetes  
Unclassified  
O  
O  
SHHC  
S12-wms-combined\_313953  
Caudoviricetes  
Unclassified  
O  
O  
**d\_Bacteria;p\_Proteobacteria;c\_Gammaproteobacteria;o\_Burkholderiales;f\_Burkholderiaceae;g\_Oxalobacter**  
ME  
S5-wms-combined\_3201  
Caudoviricetes  
Unclassified  
O  
O  
**d\_Bacteria;p\_Proteobacteria;c\_Gammaproteobacteria;o\_Burkholderiales;f\_Burkholderiaceae;g\_Sutterella**  
Shared  
S2-wms-combined\_84608  
Caudoviricetes  
Unclassified  
O  
O  
**d\_Bacteria;p\_Proteobacteria;c\_Gammaproteobacteria;o\_Enterobacteriales;f\_Enterobacteriaceae;g\_Escherichia**  
ME  
S5-wms-combined\_18356  
Caudoviricetes  
Peduoviridae  
Unclassified

Evevirus  
S9-wms-combined\_64277  
**Caudoviricetes**  
Unclassified  
**Unclassified**  
Bcepmuvirus

SHHC  
S2-wms\_128831  
**Caudoviricetes**  
Unclassified  
**Unclassified**  
Unclassified

**d\_\_Bacteria;p\_\_Proteobacteria;c\_\_Gammaproteobacteria;o\_\_Enterobacterales;f\_\_Enterobacteriaceae;g\_\_Klebsiella**

ME  
S9-wms-combined\_93232  
**Caudoviricetes**  
Unclassified  
**O**  
**O**

**d\_\_Bacteria;p\_\_Proteobacteria;c\_\_Gammaproteobacteria;o\_\_Enterobacterales;f\_\_Enterobacteriaceae;g\_\_Salmonella**

ME  
S11-wms-combined\_154845  
**Caudoviricetes**  
Peduoviridae  
**Unclassified**  
Quadrangintavirus

**d\_\_Bacteria;p\_\_Verrucomicrobiota;c\_\_Verrucomicrobiae;o\_\_Verrucomicrobiales;f\_\_Akkermansiaceae;g\_\_Akkermansia**

ME  
S7-wms-combined\_217226  
**Caudoviricetes**  
Unclassified  
**O**  
**O**

Shared  
S12-wms-combined\_168259  
**Caudoviricetes**  
Unclassified  
**O**  
**O**

S12-wms-combined\_282594  
**Caudoviricetes**  
Unclassified  
**O**  
**O**

S1-wms-combined\_308848  
**n.a.**  
**n.a.**  
**n.a.**  
**n.a.**

S2-wms-combined\_135139  
**n.a.**  
**n.a.**  
**n.a.**  
**n.a.**

S2-wms-combined\_201205  
**Caudoviricetes**  
Unclassified  
**Unclassified**  
**O**

S2-wms-combined\_7756  
**Caudoviricetes**  
Unclassified  
**O**  
**O**

S5-wms-combined\_52741  
**Caudoviricetes**  
Unclassified  
**O**  
**O**

S8-wms-combined\_246185  
**Caudoviricetes**  
Unclassified  
**O**  
**O**

Table S9-7. VLP and WMS: host comparisons

| Shared_hosts_seen_in_both_datasets                                                                          | Unique_hosts_in_VLP                                                                                     | Unique_hosts_in_WMS                                                                                            |
|-------------------------------------------------------------------------------------------------------------|---------------------------------------------------------------------------------------------------------|----------------------------------------------------------------------------------------------------------------|
| d_Bacteria;p_Actinobacteriota;c_Actinomycetia;o_Actinomycetales;f_Bifidobacteriaceae;g_Bifidobacterium      | d_Bacteria;p_Actinobacteriota;c_Actinomycetia;o_Actinomycetales;f_Actinomycetaceae;g_Actinomycetes      | d_Bacteria;p_Actinobacteriota;c_Coribacteriia;o_Coribacteriales;f_Eggerthellaceae;g_Eggerthella                |
| d_Bacteria;p_Actinobacteriota;c_Coribacteriia;o_Coribacteriales;f_Coribacteriaceae;g_Collinsella            | d_Bacteria;p_Actinobacteriota;c_Actinomycetia;o_Actinomycetales;f_Actinomycetaceae;g_Pauljensenia       | d_Bacteria;p_Bacteroidia;c_Bacteroidia;o_Bacteroidales;f_Bacteroidaceae;g_Bacteroides_G                        |
| d_Bacteria;p_Actinobacteriota;c_Coribacteriia;o_Coribacteriales;f_Eggerthellaceae;g_Adlercreutzia           | d_Bacteria;p_Actinobacteriota;c_Actinomycetia;o_Actinomycetales;f_Micrococcaceae;g_Rothia               | d_Bacteria;p_Bacteroidia;c_Bacteroidia;o_Bacteroidales;f_Rikenellaceae;g_Tidjanibacter                         |
| d_Bacteria;p_Actinobacteriota;c_Coribacteriia;o_Coribacteriales;f_Eggerthellaceae;g_Eggerthella             | d_Bacteria;p_Actinobacteriota;c_Actinomycetia;o_Mycobacteriales;f_Mycobacteriaceae;g_Mycobacterium      | d_Bacteria;p_Campylobacteriota;c_Campylobacteriia;o_Campylobacteriales;f_Campylobacteriaceae;g_Campylobacter_D |
| d_Bacteria;p_Bacteroidia;c_Bacteroidia;o_Bacteroidales;f_Bacteroidaceae;g_Bacteroides                       | d_Bacteria;p_Actinobacteriota;c_Coribacteriia;o_Coribacteriales;f_Eggerthellaceae;g_Gordonibacter       | d_Bacteria;p_Desulfobacterota;c_Desulfovibrionia;o_Desulfovibrionales;f_Desulfovibrionaceae;g_Desulfovibrio    |
| d_Bacteria;p_Bacteroidia;c_Bacteroidia;o_Bacteroidales;f_Bacteroidaceae;g_Prevotella                        | d_Bacteria;p_Bacteroidia;c_Bacteroidia;o_Bacteroidales;f_Bacteroidaceae;g_Phocaicola                    | d_Bacteria;p_Firmicutes;c_Clostridia;o_Christensenellales;f_CAG-74;g_SFFH01                                    |
| d_Bacteria;p_Bacteroidia;c_Bacteroidia;o_Bacteroidales;f_Prevotellaceae;g_Prevotellamassilia                | d_Bacteria;p_Bacteroidia;c_Bacteroidia;o_Bacteroidales;f_Coprothaceae;g_Coprothacter                    | d_Bacteria;p_Firmicutes;c_Clostridia;o_Christensenellales;f_CAG-917;g_                                         |
| d_Bacteria;p_Bacteroidia;c_Bacteroidia;o_Bacteroidales;f_Barnesiellaceae;g_Barnesiella                      | d_Bacteria;p_Bacteroidia;c_Bacteroidia;o_Bacteroidales;f_Marinifilaceae;g_Butyricimonas                 | d_Bacteria;p_Firmicutes;c_Clostridia;o_Lachnospirales;f_Lachnospiraceae;g_Acetivibrio_A                        |
| d_Bacteria;p_Bacteroidia;c_Bacteroidia;o_Bacteroidales;f_Muribaculaceae;g_UBA7173                           | d_Bacteria;p_Bacteroidia;c_Bacteroidia;o_Bacteroidales;f_Marinifilaceae;g_Butyricimonas                 | d_Bacteria;p_Firmicutes;c_Clostridia;o_Lachnospirales;f_Lachnospiraceae;g_Anaerosacchariphilus                 |
| d_Bacteria;p_Bacteroidia;c_Bacteroidia;o_Bacteroidales;f_Rikenellaceae;g_Alistipes                          | d_Bacteria;p_Bacteroidia;c_Bacteroidia;o_Bacteroidales;f_P3;g_Phil12                                    | d_Bacteria;p_Firmicutes;c_Clostridia;o_Lachnospirales;f_Lachnospiraceae;g_CAG-81                               |
| d_Bacteria;p_Bacteroidia;c_Bacteroidia;o_Bacteroidales;f_Rikenellaceae;g_Alistipes_A                        | d_Bacteria;p_Cyanobacteriia;c_Vampirovibrionia;o_Gastranaerophilales;f_Gastranaerophilaceae;g_CAG-306   | d_Bacteria;p_Firmicutes;c_Clostridia;o_Lachnospirales;f_Lachnospiraceae;g_COE1                                 |
| d_Bacteria;p_Bacteroidia;c_Bacteroidia;o_Bacteroidales;f_Tannerellaceae;g_Marseille-P3160                   | d_Bacteria;p_Desulfobacterota;c_Desulfovibrionia;o_Desulfovibrionales;f_Desulfovibrionaceae;g_Mailhella | d_Bacteria;p_Firmicutes;c_Clostridia;o_Lachnospirales;f_Lachnospiraceae;g_Fuscitenibacter                      |
| d_Bacteria;p_Bacteroidia;c_Bacteroidia;o_Bacteroidales;f_Tannerellaceae;g_Parabacteroides                   | d_Bacteria;p_Firmicutes;c_Bacilli;o_Erysipelotrichales;f_Erysipelatoclostridiaceae;g_Catenibacterium    | d_Bacteria;p_Firmicutes;c_Clostridia;o_Lachnospirales;f_Lachnospiraceae;g_HGM12998                             |
| d_Bacteria;p_Bacteroidia;c_Bacteroidia;o_Bacteroidales;f_UBA11471;g_UBA11471                                | d_Bacteria;p_Firmicutes;c_Bacilli;o_Erysipelotrichales;f_Erysipelatoclostridiaceae;g_Faecalibacillus    | d_Bacteria;p_Firmicutes;c_Clostridia;o_Oscillospirales;f_Oscillospiraceae;g_F23-B02                            |
| d_Bacteria;p_Cyanobacteriia;c_Vampirovibrionia;o_Gastranaerophilales;f_Gastranaerophilaceae;g_QAM001        | d_Bacteria;p_Firmicutes;c_Bacilli;o_Erysipelotrichales;f_Erysipelatoclostridiaceae;g_Massiliomicrobiota | d_Bacteria;p_Firmicutes;c_Clostridia;o_Oscillospirales;f_Oscillospiraceae;g_Faecocisia                         |
| d_Bacteria;p_Desulfobacterota;c_Desulfovibrionia;o_Desulfovibrionales;f_Desulfovibrionaceae;g_Bilophia      | d_Bacteria;p_Firmicutes;c_Bacilli;o_Erysipelotrichales;f_Erysipelotrichaceae;g_Holdemania               | d_Bacteria;p_Firmicutes;c_Clostridia;o_Oscillospirales;f_Oscillospiraceae;g_HGM12998                           |
| d_Bacteria;p_Firmicutes;c_Bacilli;o_Erysipelotrichales;f_Erysipelatoclostridiaceae;g_Erysipelatoclostridium | d_Bacteria;p_Firmicutes;c_Bacilli;o_Erysipelotrichales;f_Erysipelotrichaceae;g_Holdemania               | d_Bacteria;p_Firmicutes;c_Clostridia;o_Oscillospirales;f_Oscillospiraceae;g_Marseille-P3106                    |
| d_Bacteria;p_Firmicutes;c_Bacilli;o_Erysipelotrichales;f_Erysipelotrichaceae;g_Clostridium_AQ               | d_Bacteria;p_Firmicutes;c_Bacilli;o_Haloplasmatales;f_Turicibacteriaceae;g_Turicibacter                 | d_Bacteria;p_Firmicutes;c_Clostridia;o_Oscillospirales;f_Oscillospiraceae;g_Pseudoflavonifractor               |
| d_Bacteria;p_Firmicutes;c_Bacilli;o_Lactobacillales;f_Lactobacillaceae;g_Lactocaseibacillus                 | d_Bacteria;p_Firmicutes;c_Bacilli;o_Lactobacillales;f_Lactobacillaceae;g_Lactobacillus                  | d_Bacteria;p_Firmicutes;c_Clostridia;o_Oscillospirales;f_Oscillospiraceae;g_UBA738                             |
| d_Bacteria;p_Firmicutes;c_Bacilli;o_Lactobacillales;f_Streptococcaceae;g_Streptococcus                      | d_Bacteria;p_Firmicutes;c_Bacilli;o_Lactobacillales;f_Lactobacillaceae;g_Leuconostoc                    | d_Bacteria;p_Firmicutes;c_Clostridia;o_Oscillospirales;f_Oscillospiraceae;g_UMGS363                            |
| d_Bacteria;p_Firmicutes;c_Clostridia;o_Christensenellales;f_CAG-138;g_SFE01                                 | d_Bacteria;p_Firmicutes;c_Bacilli;o_Lactobacillales;f_Lactobacillaceae;g_Limosilactobacillus            | d_Bacteria;p_Firmicutes;c_Negativicutes;o_Acidaminococcales;f_Acidaminococcaceae;g_Phascocartobacterium_A      |
| d_Bacteria;p_Firmicutes;c_Clostridia;o_Christensenellales;f_CAG-138;g_UBA1685                               | d_Bacteria;p_Firmicutes;c_Bacilli;o_Lactobacillales;f_Streptococcaceae;g_Lactococcus                    | d_Bacteria;p_Firmicutes;c_Negativicutes;o_Selenomonadales;f_Selenomonadaceae;g_Megamonas                       |
| d_Bacteria;p_Firmicutes;c_Clostridia;o_Christensenellales;f_CAG-74;g_Firm-11                                | d_Bacteria;p_Firmicutes;c_Bacilli;o_ML615J-28;f_CAG-313;g_CAG-313                                       | d_Bacteria;p_Patescibacteriia;c_Paceibacteriia;o_Paceibacteriales;f_UBA5633;g_MWCK01                           |
| d_Bacteria;p_Firmicutes;c_Clostridia;o_Christensenellales;f_CAG-74;g_Limiplasma                             | d_Bacteria;p_Firmicutes;c_Bacilli;o_RF39;f_UBA660;g_CAG-302                                             | d_Bacteria;p_Proteobacteriia;c_Gammaproteobacteria;o_Burkholderiales;f_Burkholderiaceae;g_Oxalobacter          |
| d_Bacteria;p_Firmicutes;c_Clostridia;o_Christensenellales;f_CAG-74;g_UBA11524                               | d_Bacteria;p_Firmicutes;c_Bacilli;o_RF39;f_UBA660;g_CAG-460                                             | d_Bacteria;p_Proteobacteriia;c_Gammaproteobacteria;o_Enterobacteriales;f_Enterobacteriaceae;g_Klebsiella       |
| d_Bacteria;p_Firmicutes;c_Clostridia;o_Christensenellales;f_CAG-74;g_Ventricola                             | d_Bacteria;p_Firmicutes;c_Bacilli;o_RF39;f_UBA660;g_CAG-877                                             |                                                                                                                |
| d_Bacteria;p_Firmicutes;c_Clostridia;o_Christensenellales;f_CAG-917;g_CAG-475                               | d_Bacteria;p_Firmicutes;c_Clostridia;o_Activobacteriales;f_Activobacteriaceae;g_Ruminoclostridium       | Stats:                                                                                                         |
| d_Bacteria;p_Firmicutes;c_Clostridia;o_Christensenellales;f_Christensenellaceae;g_Christensenella           | d_Bacteria;p_Firmicutes;c_Clostridia;o_Christensenellales;f_Borkfalkiaceae;g_QAL501                     | Hosts interact with ME-vOTUs uniquely: 6/25 (24%)                                                              |
| d_Bacteria;p_Firmicutes;c_Clostridia;o_Clostridiales;f_Clostridiaceae;g_Clostridium                         | d_Bacteria;p_Firmicutes;c_Clostridia;o_Christensenellales;f_CAG-138;g_UBA5394                           | Hosts interact with SHHC-vOTUs uniquely: 10/25 (40%)                                                           |
| d_Bacteria;p_Firmicutes;c_Clostridia;o_Eubacteriales;f_Eubacteriaceae;g_Eubacterium                         | d_Bacteria;p_Firmicutes;c_Clostridia;o_Christensenellales;f_CAG-74;g_Alectryococcumicrobium             | Hosts interact with common viruses (vOTUs) shared in both ME and SHHC: 9/25 (36%)                              |
| d_Bacteria;p_Firmicutes;c_Clostridia;o_Lachnospirales;f_Anaerotrignaceae;g_Anaerotrignum                    | d_Bacteria;p_Firmicutes;c_Clostridia;o_Christensenellales;f_CAG-74;g_SFTH01                             |                                                                                                                |
| d_Bacteria;p_Firmicutes;c_Clostridia;o_Lachnospirales;f_Lachnospiraceae;g_Acetatifactor                     | d_Bacteria;p_Firmicutes;c_Clostridia;o_Christensenellales;f_NSJ-53;g_NSJ-53                             |                                                                                                                |
| d_Bacteria;p_Firmicutes;c_Clostridia;o_Lachnospirales;f_Lachnospiraceae;g_Agathobacter                      | d_Bacteria;p_Firmicutes;c_Clostridia;o_Christensenellales;f_QAND01;g_UMGS1975                           |                                                                                                                |
| d_Bacteria;p_Firmicutes;c_Clostridia;o_Lachnospirales;f_Lachnospiraceae;g_Anaerobutyrum                     | d_Bacteria;p_Firmicutes;c_Clostridia;o_Clostridiales;f_Clostridiaceae;g_Clostridium_J                   |                                                                                                                |
| d_Bacteria;p_Firmicutes;c_Clostridia;o_Lachnospirales;f_Lachnospiraceae;g_Anaerotrignum                     | d_Bacteria;p_Firmicutes;c_Clostridia;o_Lachnospirales;f_Anaerotrignaceae;g_UMGS1670                     |                                                                                                                |
| d_Bacteria;p_Firmicutes;c_Clostridia;o_Lachnospirales;f_Lachnospiraceae;g_Banatrius                         | d_Bacteria;p_Firmicutes;c_Clostridia;o_Lachnospirales;f_CAG-274;g_CAG-274                               |                                                                                                                |
| d_Bacteria;p_Firmicutes;c_Clostridia;o_Lachnospirales;f_Lachnospiraceae;g_Blautia_A                         | d_Bacteria;p_Firmicutes;c_Clostridia;o_Lachnospirales;f_Lachnospiraceae;g_                              |                                                                                                                |
| d_Bacteria;p_Firmicutes;c_Clostridia;o_Lachnospirales;f_Lachnospiraceae;g_Dorea_A                           | d_Bacteria;p_Firmicutes;c_Clostridia;o_Lachnospirales;f_Lachnospiraceae;g_Blautia                       |                                                                                                                |
| d_Bacteria;p_Firmicutes;c_Clostridia;o_Lachnospirales;f_Lachnospiraceae;g_Eisenbergiella                    | d_Bacteria;p_Firmicutes;c_Clostridia;o_Lachnospirales;f_Lachnospiraceae;g_CAG-127                       |                                                                                                                |
| d_Bacteria;p_Firmicutes;c_Clostridia;o_Lachnospirales;f_Lachnospiraceae;g_Enterocloster                     | d_Bacteria;p_Firmicutes;c_Clostridia;o_Lachnospirales;f_Lachnospiraceae;g_CAG-317                       |                                                                                                                |
| d_Bacteria;p_Firmicutes;c_Clostridia;o_Lachnospirales;f_Lachnospiraceae;g_Eubacterium_I                     | d_Bacteria;p_Firmicutes;c_Clostridia;o_Lachnospirales;f_Lachnospiraceae;g_Clostridium_AP                |                                                                                                                |
| d_Bacteria;p_Firmicutes;c_Clostridia;o_Lachnospirales;f_Lachnospiraceae;g_Faecalimonas                      | d_Bacteria;p_Firmicutes;c_Clostridia;o_Lachnospirales;f_Lachnospiraceae;g_Coproccoccus                  |                                                                                                                |
| d_Bacteria;p_Firmicutes;c_Clostridia;o_Lachnospirales;f_Anaerotrignaceae;g_Anaerotrignum                    | d_Bacteria;p_Firmicutes;c_Clostridia;o_Lachnospirales;f_Lachnospiraceae;g_Dorea                         |                                                                                                                |
| d_Bacteria;p_Firmicutes;c_Clostridia;o_Lachnospirales;f_Lachnospiraceae;g_Mediterraneibacter                | d_Bacteria;p_Firmicutes;c_Clostridia;o_Lachnospirales;f_Lachnospiraceae;g_Eubacterium_F                 |                                                                                                                |
| d_Bacteria;p_Firmicutes;c_Clostridia;o_Lachnospirales;f_Lachnospiraceae;g_Roseburia                         | d_Bacteria;p_Firmicutes;c_Clostridia;o_Lachnospirales;f_Lachnospiraceae;g_Eubacterium_G                 |                                                                                                                |
| d_Bacteria;p_Firmicutes;c_Clostridia;o_Lachnospirales;f_Lachnospiraceae;g_UBA9502                           | d_Bacteria;p_Firmicutes;c_Clostridia;o_Lachnospirales;f_Lachnospiraceae;g_Frisingococcus                |                                                                                                                |
| d_Bacteria;p_Firmicutes;c_Clostridia;o_Oscillospirales;f_Acutalibacteraceae;g_Acutalibacter                 | d_Bacteria;p_Firmicutes;c_Clostridia;o_Lachnospirales;f_Lachnospiraceae;g_Hungateella                   |                                                                                                                |
| d_Bacteria;p_Firmicutes;c_Clostridia;o_Oscillospirales;f_Acutalibacteraceae;g_CAG-180                       | d_Bacteria;p_Firmicutes;c_Clostridia;o_Lachnospirales;f_Lachnospiraceae;g_Marvinbryantia                |                                                                                                                |
| d_Bacteria;p_Firmicutes;c_Clostridia;o_Oscillospirales;f_Acutalibacteraceae;g_CAG-217                       | d_Bacteria;p_Firmicutes;c_Clostridia;o_Lachnospirales;f_Lachnospiraceae;g_Massilistercora               |                                                                                                                |
| d_Bacteria;p_Firmicutes;c_Clostridia;o_Oscillospirales;f_Acutalibacteraceae;g_Ruminococcus_E                | d_Bacteria;p_Firmicutes;c_Clostridia;o_Lachnospirales;f_Lachnospiraceae;g_Muricorpes                    |                                                                                                                |
| d_Bacteria;p_Firmicutes;c_Clostridia;o_Oscillospirales;f_Acutalibacteraceae;g_UBA1417                       | d_Bacteria;p_Firmicutes;c_Clostridia;o_Lachnospirales;f_Lachnospiraceae;g_OF09-33X0                     |                                                                                                                |
| d_Bacteria;p_Firmicutes;c_Clostridia;o_Oscillospirales;f_Butyricoccaceae;g_Agathobaculum                    | d_Bacteria;p_Firmicutes;c_Clostridia;o_Lachnospirales;f_Lachnospiraceae;g_RUG115                        |                                                                                                                |
| d_Bacteria;p_Firmicutes;c_Clostridia;o_Oscillospirales;f_Oscillospiraceae;g_                                | d_Bacteria;p_Firmicutes;c_Clostridia;o_Lachnospirales;f_Lachnospiraceae;g_Ruminococcus_B                |                                                                                                                |
| d_Bacteria;p_Firmicutes;c_Clostridia;o_Oscillospirales;f_Oscillospiraceae;g_An92                            | d_Bacteria;p_Firmicutes;c_Clostridia;o_Lachnospirales;f_Lachnospiraceae;g_Sellimonas                    |                                                                                                                |
| d_Bacteria;p_Firmicutes;c_Clostridia;o_Oscillospirales;f_Oscillospiraceae;g_CAG-103                         | d_Bacteria;p_Firmicutes;c_Clostridia;o_Lachnospirales;f_Lachnospiraceae;g_Ventrimonas                   |                                                                                                                |
| d_Bacteria;p_Firmicutes;c_Clostridia;o_Oscillospirales;f_Oscillospiraceae;g_CAG-110                         | d_Bacteria;p_Firmicutes;c_Clostridia;o_Monoglobales;f_Monoglobaceae;g_Monoglobus                        |                                                                                                                |
| d_Bacteria;p_Firmicutes;c_Clostridia;o_Oscillospirales;f_Oscillospiraceae;g_CAG-170                         | d_Bacteria;p_Firmicutes;c_Clostridia;o_Oscillospirales;f_Acutalibacteraceae;g_An172                     |                                                                                                                |
| d_Bacteria;p_Firmicutes;c_Clostridia;o_Oscillospirales;f_Oscillospiraceae;g_CAG-83                          | d_Bacteria;p_Firmicutes;c_Clostridia;o_Oscillospirales;f_Acutalibacteraceae;g_Eubacterium_R             |                                                                                                                |
| d_Bacteria;p_Firmicutes;c_Clostridia;o_Oscillospirales;f_Oscillospiraceae;g_Dysosmobacter                   | d_Bacteria;p_Firmicutes;c_Clostridia;o_Oscillospirales;f_Acutalibacteraceae;g_Fimivivinus               |                                                                                                                |
| d_Bacteria;p_Firmicutes;c_Clostridia;o_Oscillospirales;f_Oscillospiraceae;g_ER4                             | d_Bacteria;p_Firmicutes;c_Clostridia;o_Oscillospirales;f_Acutalibacteraceae;g_Hydrogeniclostridium      |                                                                                                                |
| d_Bacteria;p_Firmicutes;c_Clostridia;o_Oscillospirales;f_Oscillospiraceae;g_Evepia                          | d_Bacteria;p_Firmicutes;c_Clostridia;o_Oscillospirales;f_Acutalibacteraceae;g_Pseudomonococcus          |                                                                                                                |
| d_Bacteria;p_Firmicutes;c_Clostridia;o_Oscillospirales;f_Oscillospiraceae;g_Flavonifractor                  | d_Bacteria;p_Firmicutes;c_Clostridia;o_Oscillospirales;f_Acutalibacteraceae;g_UBA1691                   |                                                                                                                |
| d_Bacteria;p_Firmicutes;c_Clostridia;o_Oscillospirales;f_Oscillospiraceae;g_Intestinimonas                  | d_Bacteria;p_Firmicutes;c_Clostridia;o_Oscillospirales;f_Acutalibacteraceae;g_UBA737                    |                                                                                                                |
| d_Bacteria;p_Firmicutes;c_Clostridia;o_Oscillospirales;f_Oscillospiraceae;g_Lawsonibacter                   | d_Bacteria;p_Firmicutes;c_Clostridia;o_Oscillospirales;f_Acutalibacteraceae;g_UMGS1071                  |                                                                                                                |
| d_Bacteria;p_Firmicutes;c_Clostridia;o_Oscillospirales;f_Oscillospiraceae;g_UBA9475                         | d_Bacteria;p_Firmicutes;c_Clostridia;o_Oscillospirales;f_Acutalibacteraceae;g_UMGS1591                  |                                                                                                                |
| d_Bacteria;p_Firmicutes;c_Clostridia;o_Oscillospirales;f_Ruminococcaceae;g_Faecalibacterium                 | d_Bacteria;p_Firmicutes;c_Clostridia;o_Oscillospirales;f_Acutalibacteraceae;g_UMGS263                   |                                                                                                                |
| d_Bacteria;p_Firmicutes;c_Clostridia;o_Oscillospirales;f_Ruminococcaceae;g_Gemmiger                         | d_Bacteria;p_Firmicutes;c_Clostridia;o_Oscillospirales;f_Acutalibacteraceae;g_UMGS856                   |                                                                                                                |
| d_Bacteria;p_Firmicutes;c_Clostridia;o_Oscillospirales;f_Ruminococcaceae;g_Negativibacillus                 | d_Bacteria;p_Firmicutes;c_Clostridia;o_Oscillospirales;f_CAG-272;g_CAG-272                              |                                                                                                                |

d\_\_Bacteria;p\_\_Firmicutes;c\_\_Clostridia;o\_\_Oscillospirales;f\_\_Ruminococcaceae;g\_\_Ruminiclostridium\_E  
d\_\_Bacteria;p\_\_Firmicutes;c\_\_Clostridia;o\_\_Oscillospirales;f\_\_Ruminococcaceae;g\_\_Ruminococcus\_D  
d\_\_Bacteria;p\_\_Firmicutes;c\_\_Clostridia;o\_\_Oscillospirales;f\_\_Ruminococcaceae;g\_\_Ruthenibacterium  
d\_\_Bacteria;p\_\_Firmicutes;c\_\_Clostridia;o\_\_Oscillospirales;f\_\_Ruminococcaceae;g\_\_UBA3818  
d\_\_Bacteria;p\_\_Firmicutes;c\_\_Negativicutes;o\_\_Veillonellales;f\_\_Dialisteraceae;g\_\_Dialister  
d\_\_Bacteria;p\_\_Firmicutes;c\_\_Negativicutes;o\_\_Veillonellales;f\_\_Veillonellaceae;g\_\_Veillonella  
d\_\_Bacteria;p\_\_Proteobacteria;c\_\_Alphaproteobacteria;o\_\_RF32;f\_\_CAG-239;g\_\_51-20  
d\_\_Bacteria;p\_\_Proteobacteria;c\_\_Alphaproteobacteria;o\_\_RF32;f\_\_CAG-239;g\_\_CAG-267  
d\_\_Bacteria;p\_\_Proteobacteria;c\_\_Alphaproteobacteria;o\_\_RF32;f\_\_CAG-239;g\_\_CAG-495  
d\_\_Bacteria;p\_\_Proteobacteria;c\_\_Gammaproteobacteria;o\_\_Burkholderiales;f\_\_Burkholderiaceae;g\_\_Sutterella  
d\_\_Bacteria;p\_\_Proteobacteria;c\_\_Gammaproteobacteria;o\_\_Enterobacterales;f\_\_Enterobacteriaceae;g\_\_Escherichia  
d\_\_Bacteria;p\_\_Proteobacteria;c\_\_Gammaproteobacteria;o\_\_Enterobacterales;f\_\_Enterobacteriaceae;g\_\_Salmonella  
d\_\_Bacteria;p\_\_Verrucomicrobiota;c\_\_Verrucomicrobiae;o\_\_Verrucomicrobiales;f\_\_Akermansia

Stats:

Hosts interact with ME-vOTUs uniquely: 11/81 (13.6%)

Hosts interact with SHHC-vOTUs uniquely: 6/81 (7.4%)

Hosts interact with communal viruses shared in both ME and SHHC: 64/81 (79%)

d\_\_Bacteria;p\_\_Firmicutes;c\_\_Clostridia;o\_\_Oscillospirales;f\_\_CAG-272;g\_\_QALR01  
d\_\_Bacteria;p\_\_Firmicutes;c\_\_Clostridia;o\_\_Oscillospirales;f\_\_Oscillospiraceae;g\_\_Enterococcus  
d\_\_Bacteria;p\_\_Firmicutes;c\_\_Clostridia;o\_\_Oscillospirales;f\_\_Oscillospiraceae;g\_\_UBA5446  
d\_\_Bacteria;p\_\_Firmicutes;c\_\_Clostridia;o\_\_Oscillospirales;f\_\_Oscillospiraceae;g\_\_UMGS1766  
d\_\_Bacteria;p\_\_Firmicutes;c\_\_Clostridia;o\_\_Oscillospirales;f\_\_Ruminococcaceae;g\_\_Anaerotruncus  
d\_\_Bacteria;p\_\_Firmicutes;c\_\_Clostridia;o\_\_Oscillospirales;f\_\_Ruminococcaceae;g\_\_CAG-353  
d\_\_Bacteria;p\_\_Firmicutes;c\_\_Clostridia;o\_\_Oscillospirales;f\_\_Ruminococcaceae;g\_\_D5  
d\_\_Bacteria;p\_\_Firmicutes;c\_\_Clostridia;o\_\_Oscillospirales;f\_\_Ruminococcaceae;g\_\_Massimaliae  
d\_\_Bacteria;p\_\_Firmicutes;c\_\_Clostridia;o\_\_Oscillospirales;f\_\_Ruminococcaceae;g\_\_Massiliclostridium  
d\_\_Bacteria;p\_\_Firmicutes;c\_\_Clostridia;o\_\_Oscillospirales;f\_\_Ruminococcaceae;g\_\_Phocaea  
d\_\_Bacteria;p\_\_Firmicutes;c\_\_Clostridia;o\_\_Oscillospirales;f\_\_Ruminococcaceae;g\_\_QAMM01  
d\_\_Bacteria;p\_\_Firmicutes;c\_\_Clostridia;o\_\_Oscillospirales;f\_\_Ruminococcaceae;g\_\_Ruminococcus\_C  
d\_\_Bacteria;p\_\_Firmicutes;c\_\_Clostridia;o\_\_Oscillospirales;f\_\_UMGS1783;g\_\_UMGS1783  
d\_\_Bacteria;p\_\_Firmicutes;c\_\_Clostridia;o\_\_Peptostreptococcales;f\_\_Anaerovoracaceae;g\_\_CAG-145  
d\_\_Bacteria;p\_\_Firmicutes;c\_\_Clostridia;o\_\_Peptostreptococcales;f\_\_Peptostreptococcaceae;g\_\_GCA-900066495  
d\_\_Bacteria;p\_\_Firmicutes;c\_\_Clostridia;o\_\_TAN877;f\_\_CAG-508;g\_\_CAG-269  
d\_\_Bacteria;p\_\_Firmicutes;c\_\_Clostridia;o\_\_TAN877;f\_\_CAG-508;g\_\_CAG-354  
d\_\_Bacteria;p\_\_Firmicutes;c\_\_Clostridia;o\_\_UBA1212;f\_\_UBA1255;g\_\_Egeriisoma  
d\_\_Bacteria;p\_\_Firmicutes;c\_\_Negativicutes;o\_\_Acidaminococcales;f\_\_Acidaminococcaceae;g\_\_Phascolarctobacterium  
d\_\_Bacteria;p\_\_Firmicutes;c\_\_Negativicutes;o\_\_Veillonellales;f\_\_Megaspaeiaceae;g\_\_Caecibacter  
d\_\_Bacteria;p\_\_Patescibacteria;c\_\_Paceibacteria;o\_\_UBA9983\_A;f\_\_UBA1006;g\_\_01-FULL-36-10b  
d\_\_Bacteria;p\_\_Proteobacteria;c\_\_Gammaproteobacteria;o\_\_Burkholderiales;f\_\_Burkholderiaceae;g\_\_Duodenibacillus  
d\_\_Bacteria;p\_\_Proteobacteria;c\_\_Gammaproteobacteria;o\_\_Burkholderiales;f\_\_Burkholderiaceae;g\_\_Parasutterella  
d\_\_Bacteria;p\_\_Proteobacteria;c\_\_Gammaproteobacteria;o\_\_Enterobacterales;f\_\_Pasteurellaceae;g\_\_Glaesserella  
d\_\_Bacteria;p\_\_Spirochaetota;c\_\_Spirochaetia;o\_\_Sphaerochaetales;f\_\_Sphaerochaetaceae;g\_\_UBA9732  
d\_\_Bacteria;p\_\_Verrucomicrobiota;c\_\_Lentisphaeria;o\_\_Victivallales;f\_\_Victivallaceae;g\_\_Victivallis
